# Supplementary material
Source: MDPI journal article supplement (https://www.mdpi.com/2304-6740/7/10/117)
Supplement: s1 [file s1]

# Supplementary Materials: Reduction of 2,2'-Bipyridine by Quasi-Linear 3d-Metal(I) Silylamides – A Structural and Spectroscopic Study

Igor Müller, Christian Schneider, Clemens Pietzonka, Florian Kraus and C. Gunnar Werncke

## Table of Contents

|                                                             |    |
|-------------------------------------------------------------|----|
| 1. NMR Spectra.....                                         | 1  |
| 2. IR Spectra .....                                         | 4  |
| 3. UV/Vis Spectra.....                                      | 9  |
| 4. Magnetic Data.....                                       | 18 |
| 5. Cyclic Voltammetry .....                                 | 21 |
| 6. X-Ray Diffraction Analysis and Molecular Structures..... | 26 |
| References .....                                            | 35 |

## 1. NMR Spectra

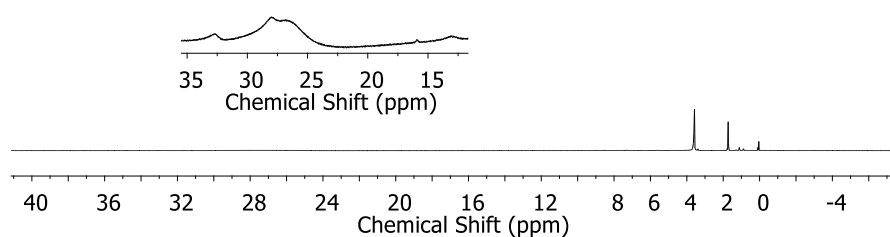

**Figure S1.**  $^1\text{H}$  NMR spectrum of  $[\text{K}\{18\text{c}6\}][\text{Cr}(\text{N}(\text{SiMe}_3)_2)(\text{bipy})]$  (1) in  $\text{THF-d}_8$  (500.1 MHz).

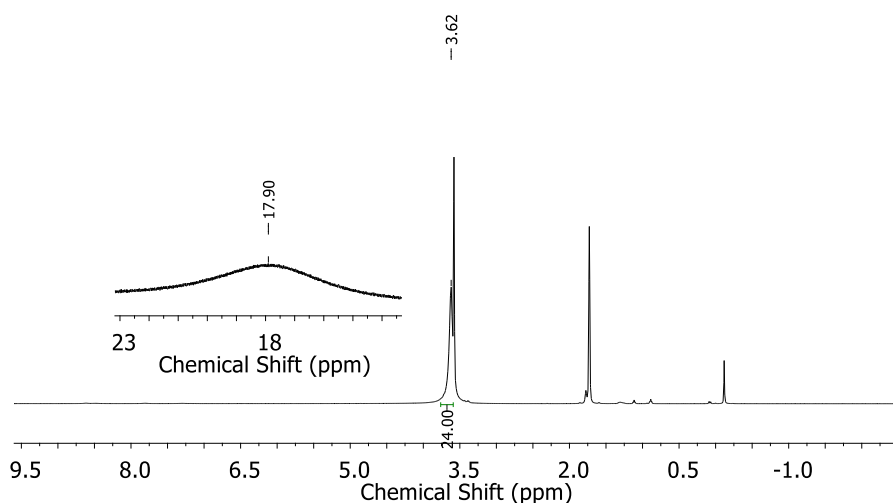

**Figure S2.**  $^1\text{H}$  NMR spectrum of  $[\text{K}\{18\text{c}6\}][\text{Mn}(\text{N}(\text{SiMe}_3)_2)(\text{bipy})]$  (2) in  $\text{THF-d}_8$  (500.1 MHz).

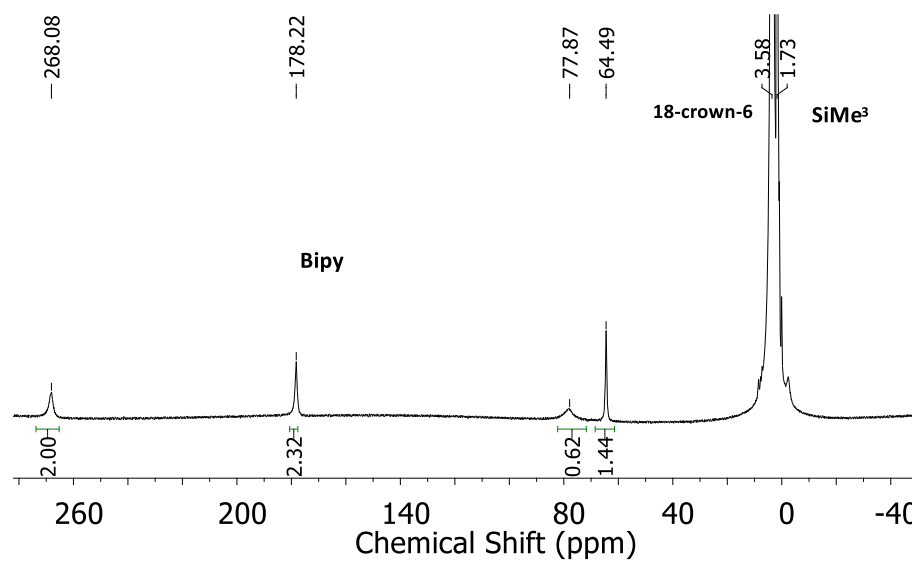

**Figure S3.** <sup>1</sup>H NMR spectrum of [K{18c6}][Fe(N(SiMe<sub>3</sub>)<sub>2</sub>)<sub>2</sub>(bipy)] (3) in THF-d<sub>8</sub> (500.1 MHz).

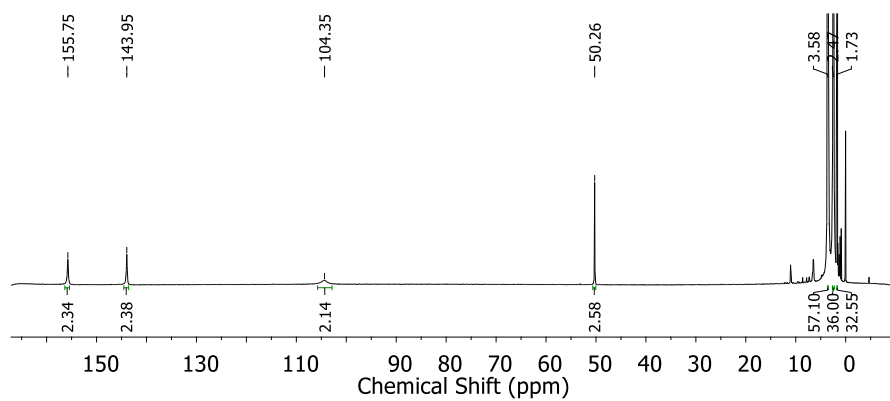

**Figure S4.** <sup>1</sup>H NMR spectrum of [K{18c6}][Co(N(SiMe<sub>3</sub>)<sub>2</sub>)<sub>2</sub>(bipy)] (4) in THF-d<sub>8</sub> (500.1 MHz).

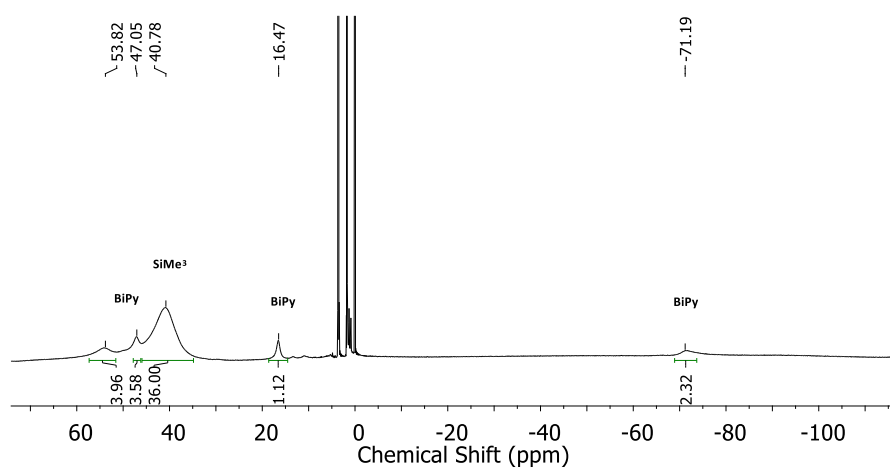

**Figure S5.** <sup>1</sup>H NMR spectrum of [Cr(N(SiMe<sub>3</sub>)<sub>2</sub>)<sub>2</sub>(bipy)] (5) in THF-d<sub>8</sub> (500.1 MHz).

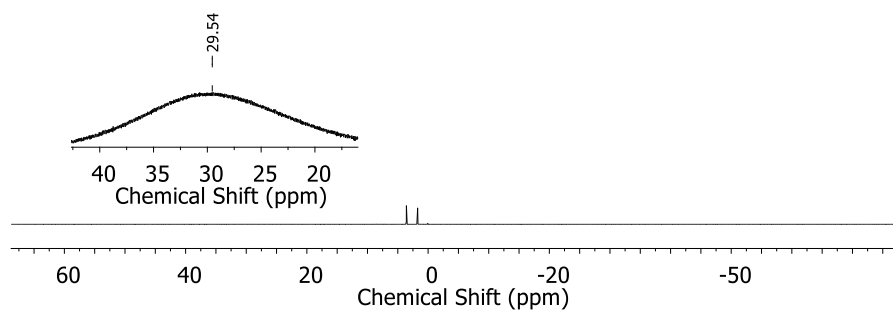

**Figure S6.**  $^1\text{H}$  NMR spectrum of  $[\text{Mn}(\text{N}(\text{SiMe}_3)_2)_2(\text{bipy})]$  (6) in  $\text{THF-d}_8$  (500.1 MHz).

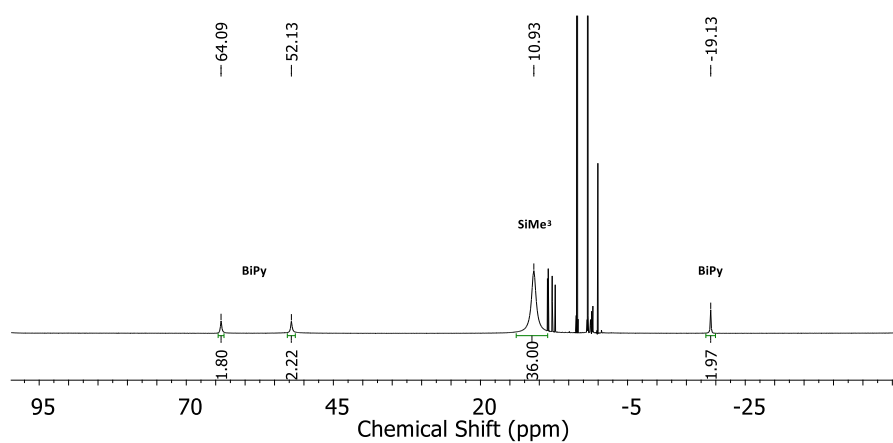

**Figure S7.**  $^1\text{H}$  NMR spectrum of  $[\text{Fe}(\text{N}(\text{SiMe}_3)_2)_2(\text{bipy})]$  (7) in  $\text{THF-d}_8$  (500.1 MHz).

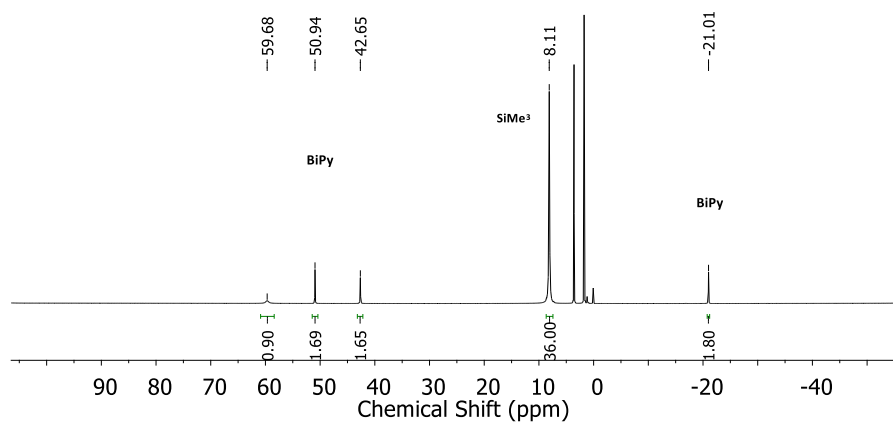

**Figure S8.**  $^1\text{H}$  NMR spectrum of  $[\text{Co}(\text{N}(\text{SiMe}_3)_2)_2(\text{bipy})]$  (8) in  $\text{THF-d}_8$  (500.1 MHz).

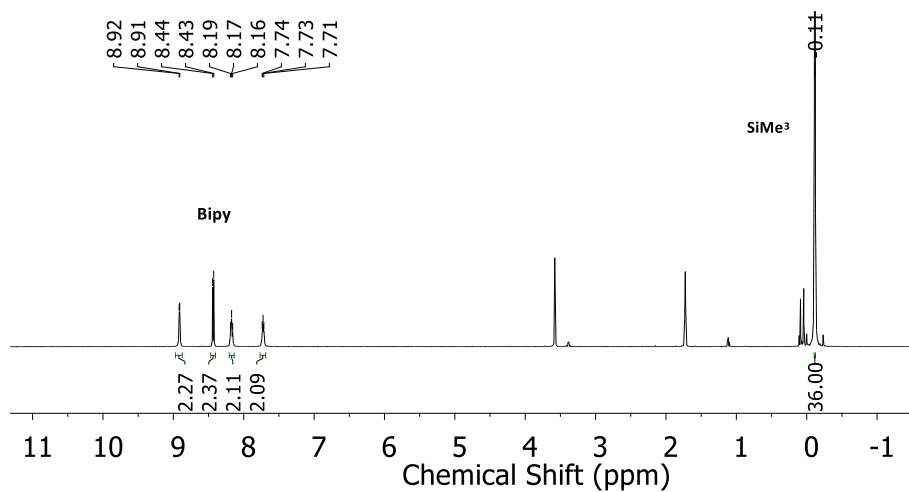

**Figure S9.** <sup>1</sup>H NMR spectrum of [Zn(N(SiMe<sub>3</sub>)<sub>2</sub>)<sub>2</sub>(bipy)] (9) in THF-d<sub>8</sub> (500.1 MHz).

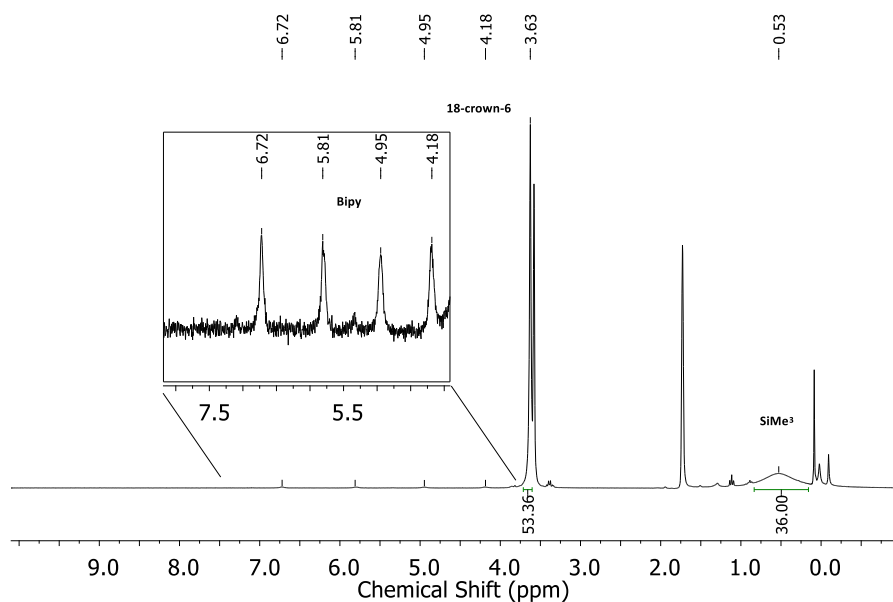

**Figure S10.** <sup>1</sup>H NMR spectrum of [K{18c6}][Zn(N(SiMe<sub>3</sub>)<sub>2</sub>)<sub>2</sub>(BiPy)] (10) in THF-d<sub>8</sub> (500.1 MHz).

## 2. IR Spectra

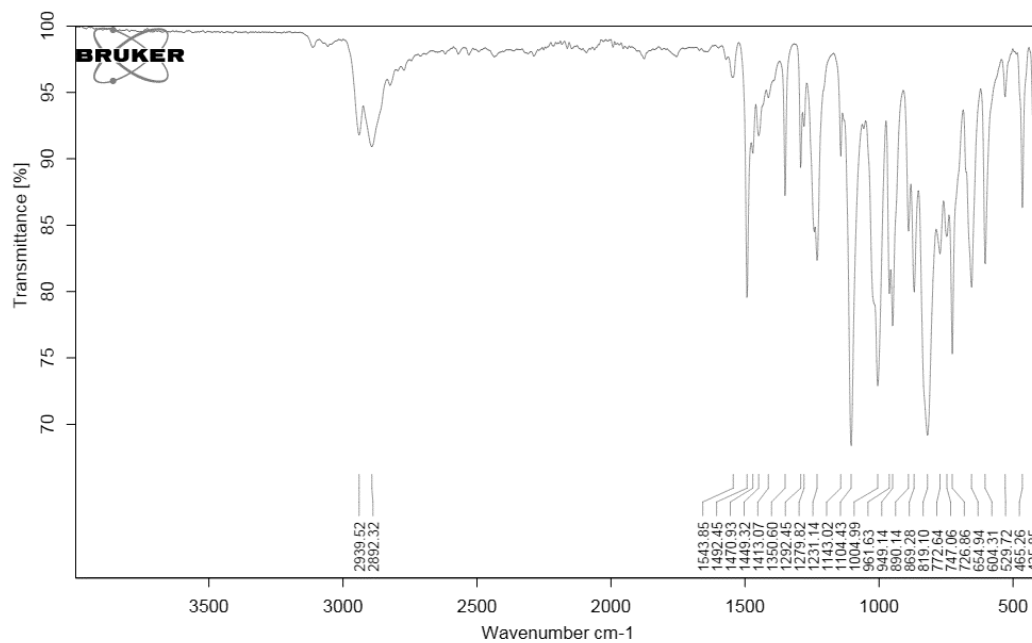

Figure S11. IR spectrum of  $[K\{18c6\}][Cr(N(SiMe_3)_2)_2(bipy)]$  (1).

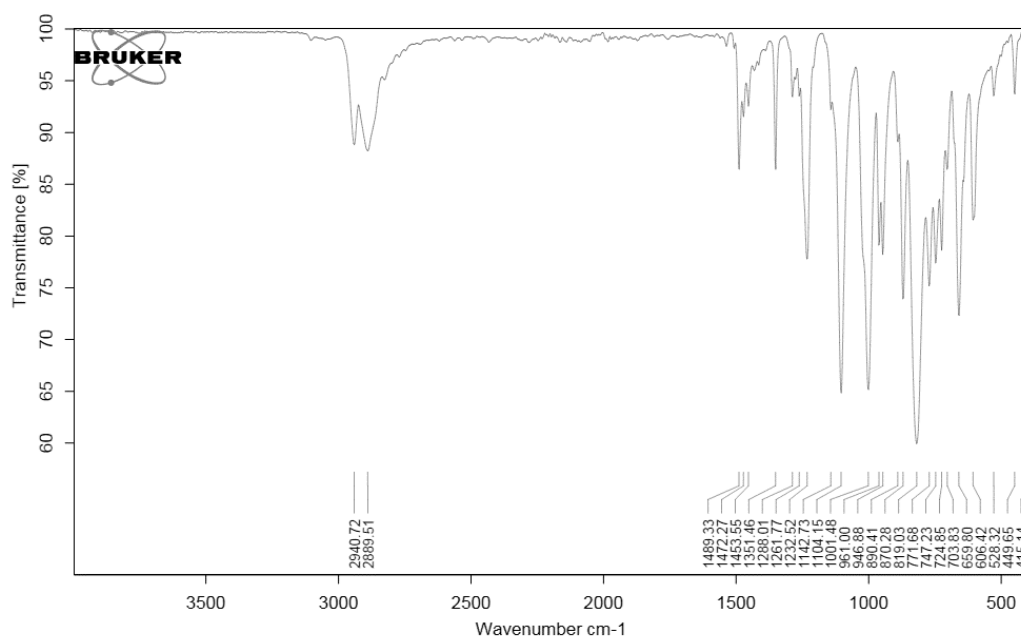

Figure S12. IR spectrum of  $[K\{18c6\}][Mn(N(SiMe_3)_2)_2(bipy)]$  (2).

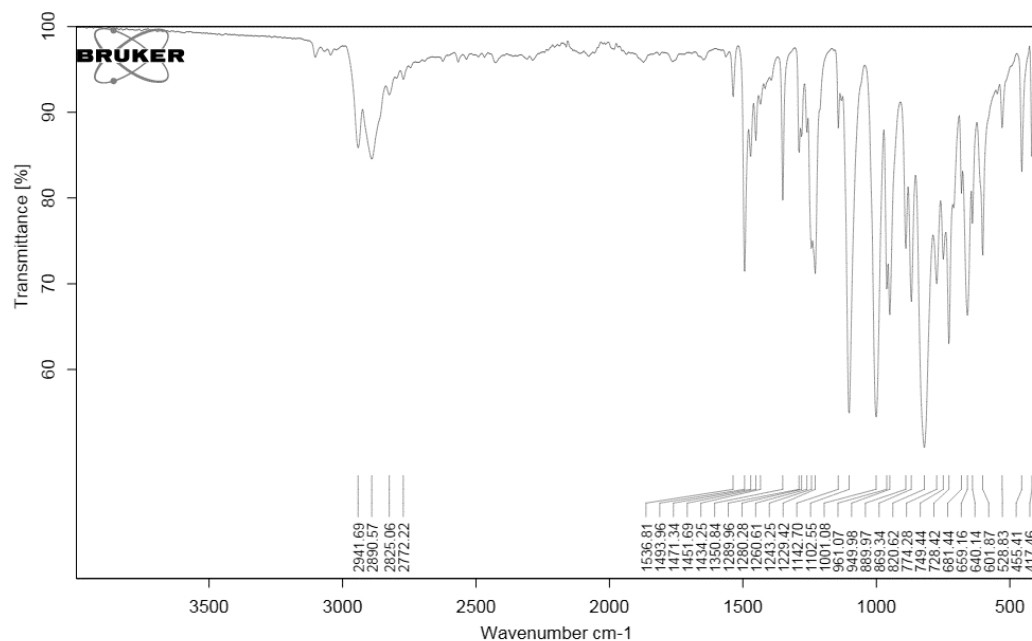

Figure S13. IR spectrum of  $[K\{18c6\}][Fe(N(SiMe_3)_2(bipy))]$  (3).

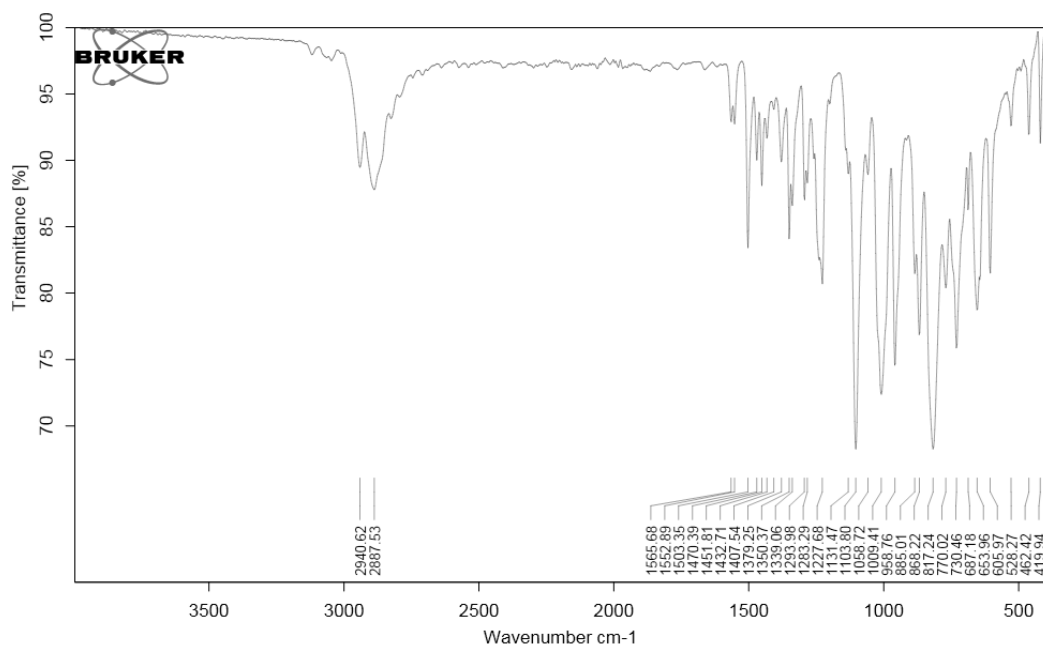

Figure S14. IR spectrum of  $[K\{18c6\}][Co(N(SiMe_3)_2(bipy))]$  (4).

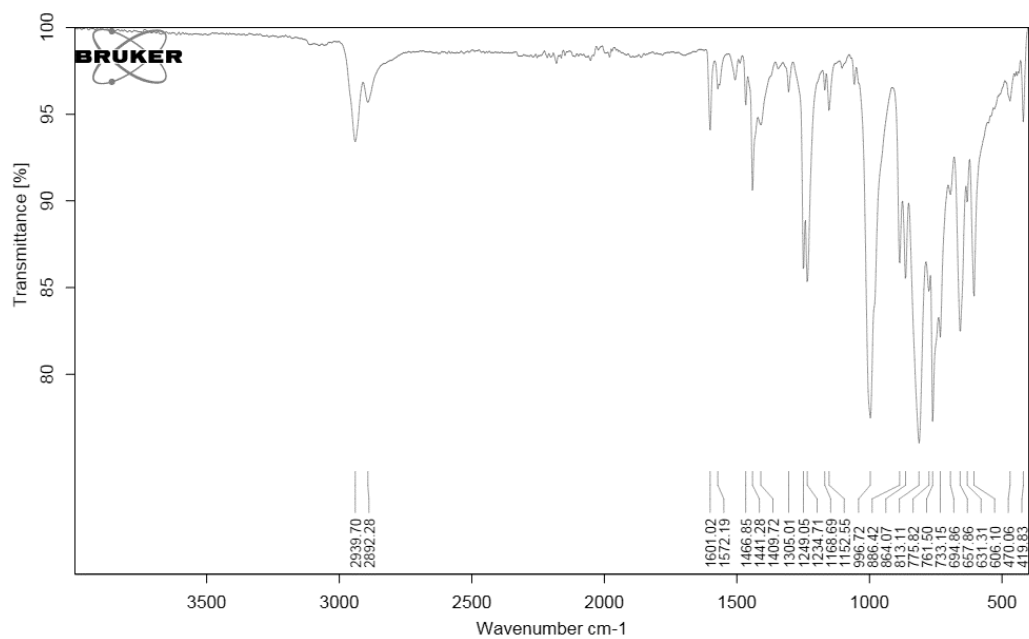

Figure S15. IR spectrum of  $[\text{Cr}(\text{N}(\text{SiMe}_3)_2)_2(\text{bipy})]$  (5).

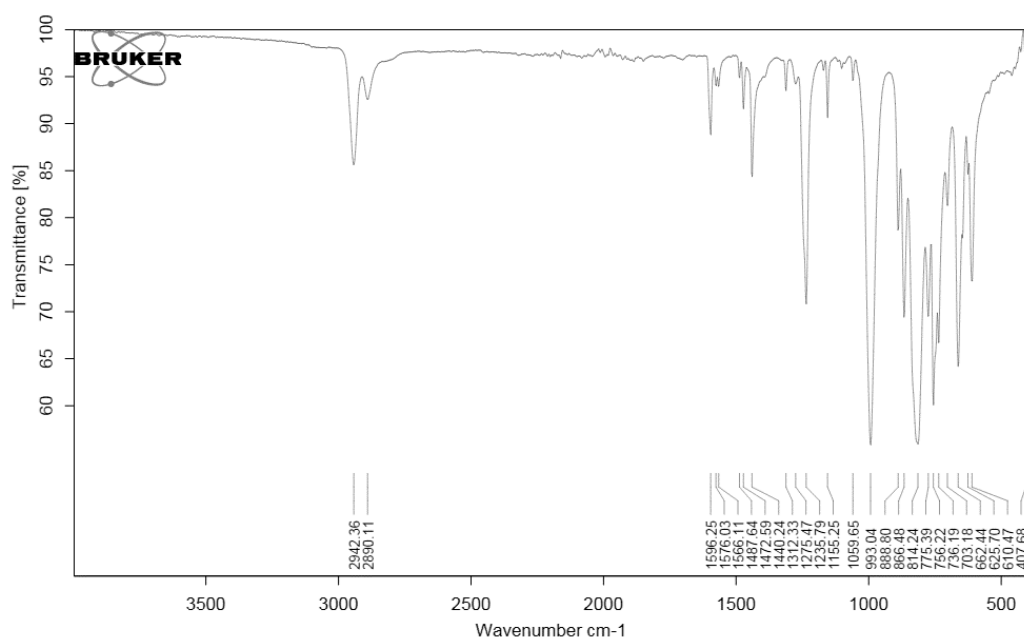

Figure S16. IR spectrum of  $[\text{Mn}(\text{N}(\text{SiMe}_3)_2)_2(\text{bipy})]$  (6).

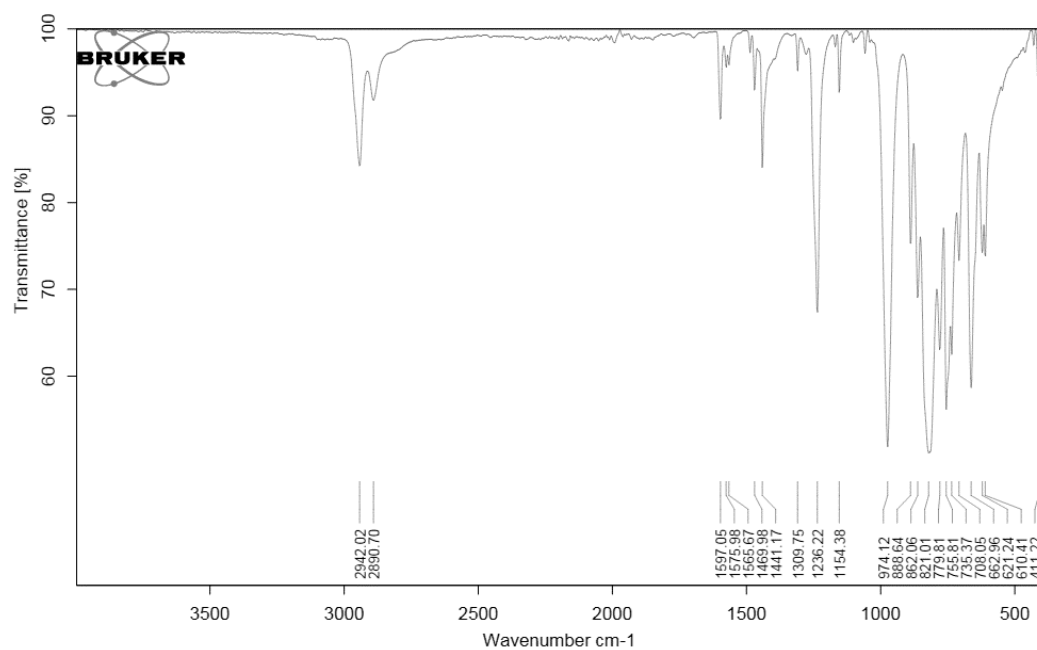Figure S17. IR spectrum of  $[\text{Fe}(\text{N}(\text{SiMe}_3)_2)_2(\text{bipy})]$  (7).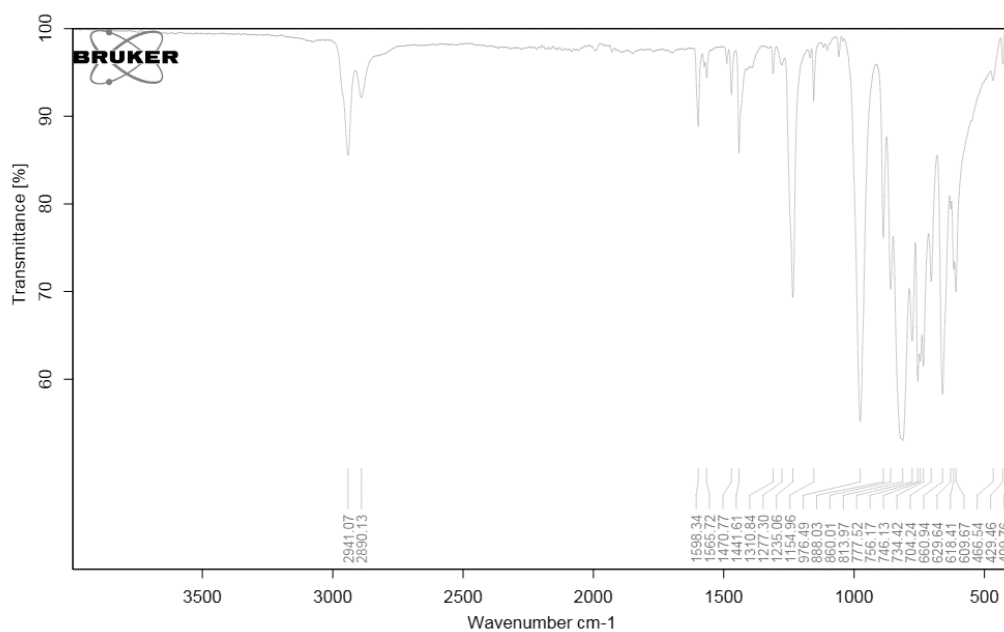Figure S18. IR spectrum of  $[\text{Co}(\text{N}(\text{SiMe}_3)_2)_2(\text{bipy})]$  (8).

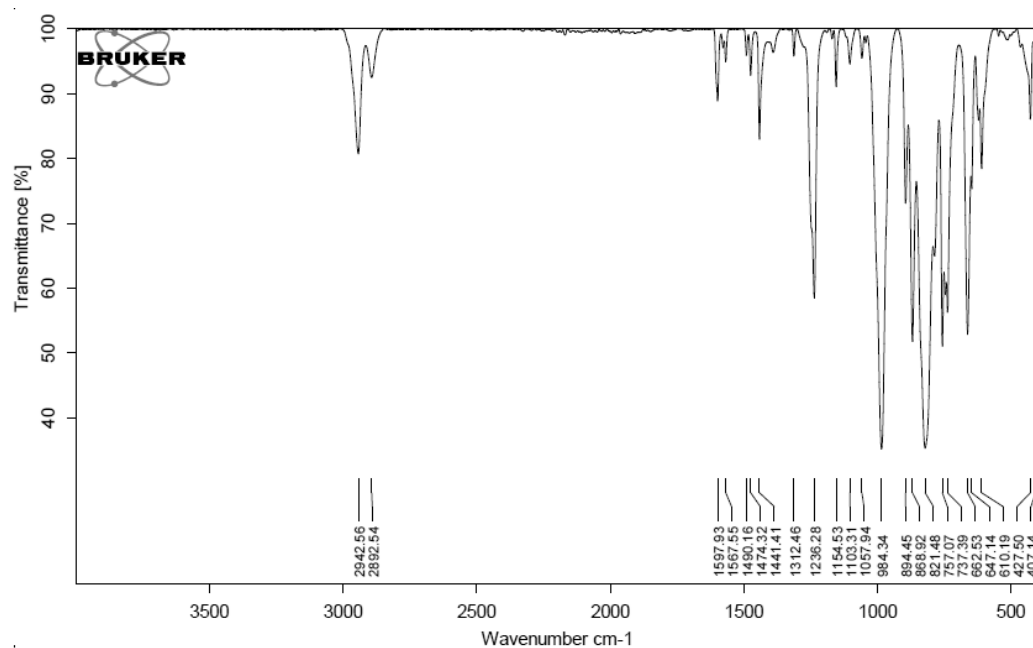

Figure S19. IR spectrum of  $[\text{Zn}(\text{N}(\text{SiMe}_3)_2)_2(\text{bipy})]$  (9).

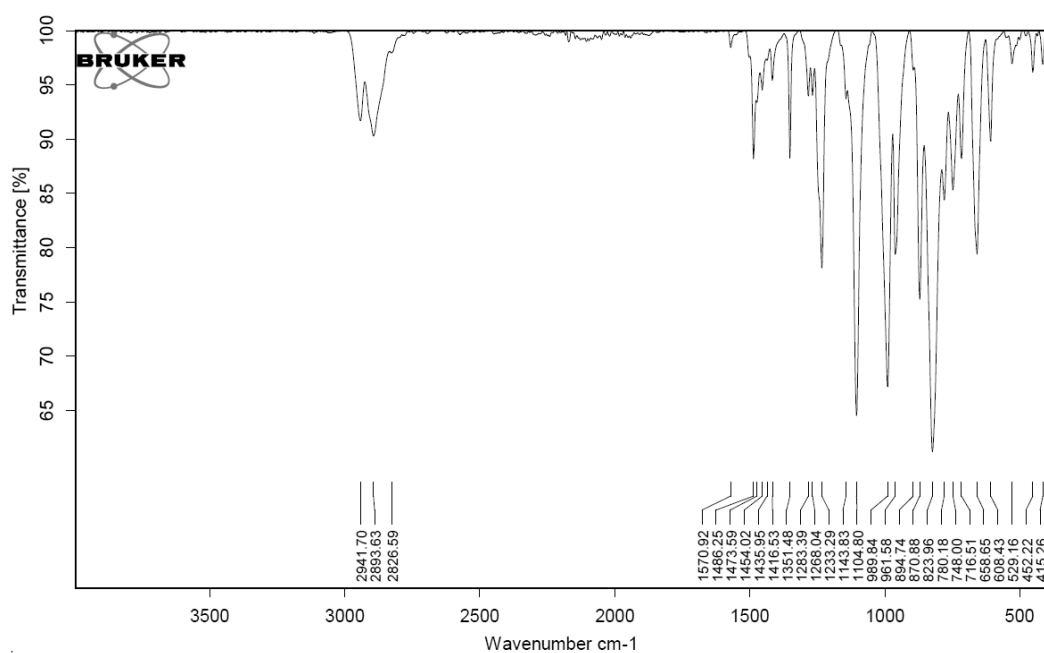

Figure S20. IR spectrum of  $[\text{K}\{18\text{c}6\}][\text{Zn}(\text{N}(\text{SiMe}_3)_2)_2(\text{bipy})]$  (10).

### 3. UV/Vis Spectra

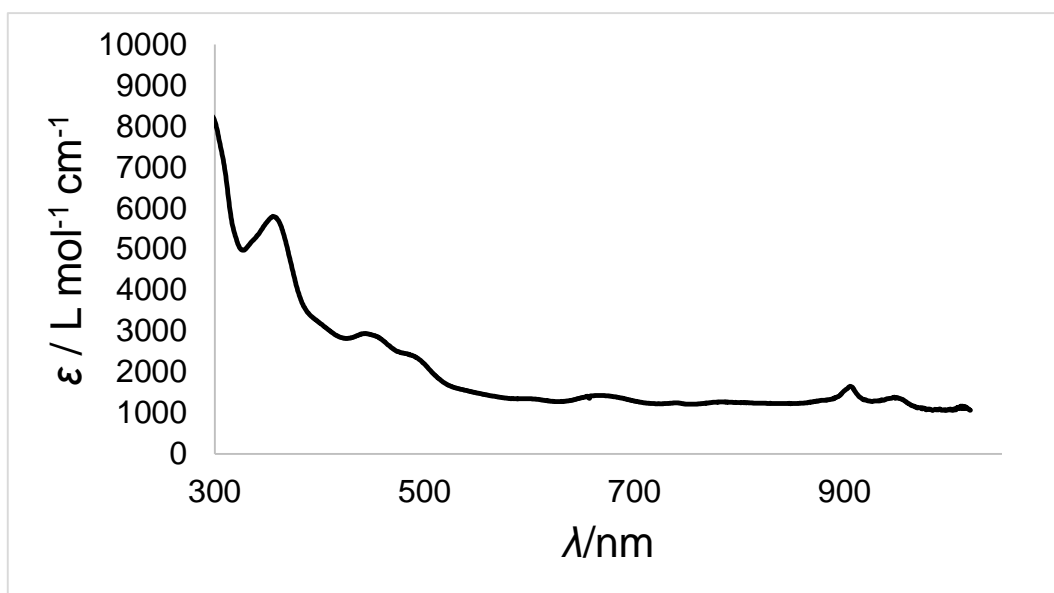

**Figure S21.** UV/Vis spectrum of  $[\text{K}\{18\text{c}6\}][\text{Cr}(\text{N}(\text{SiMe}_3)_2)_2(\text{bipy})]$  (**1**) in  $\text{Et}_2\text{O}$ .

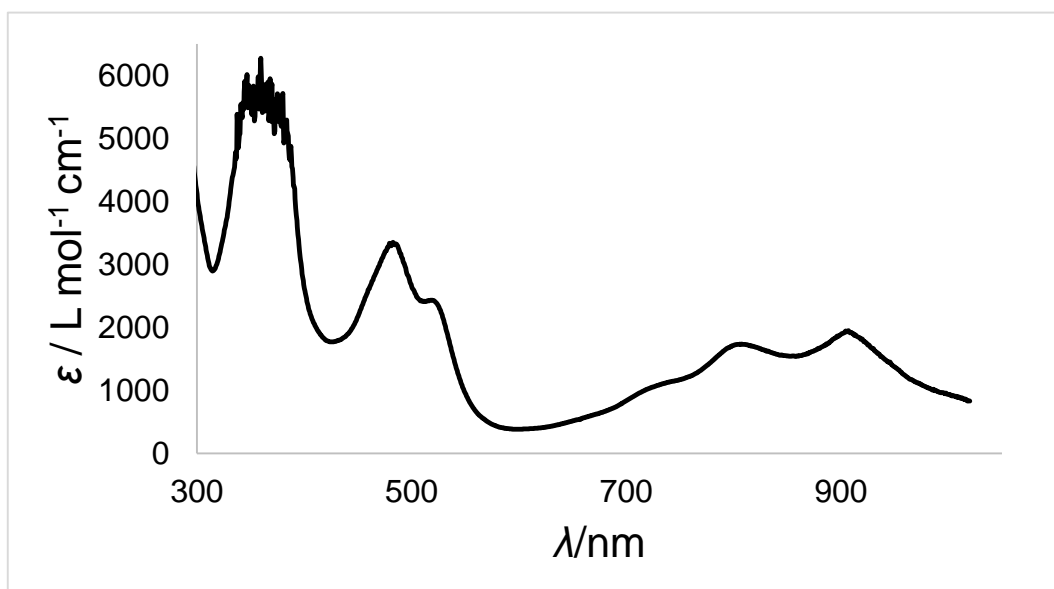

**Figure S22.** UV/Vis spectrum of  $[\text{K}\{18\text{c}6\}][\text{Mn}(\text{N}(\text{SiMe}_3)_2)_2(\text{bipy})]$  (**2**) in  $\text{Et}_2\text{O}$ .

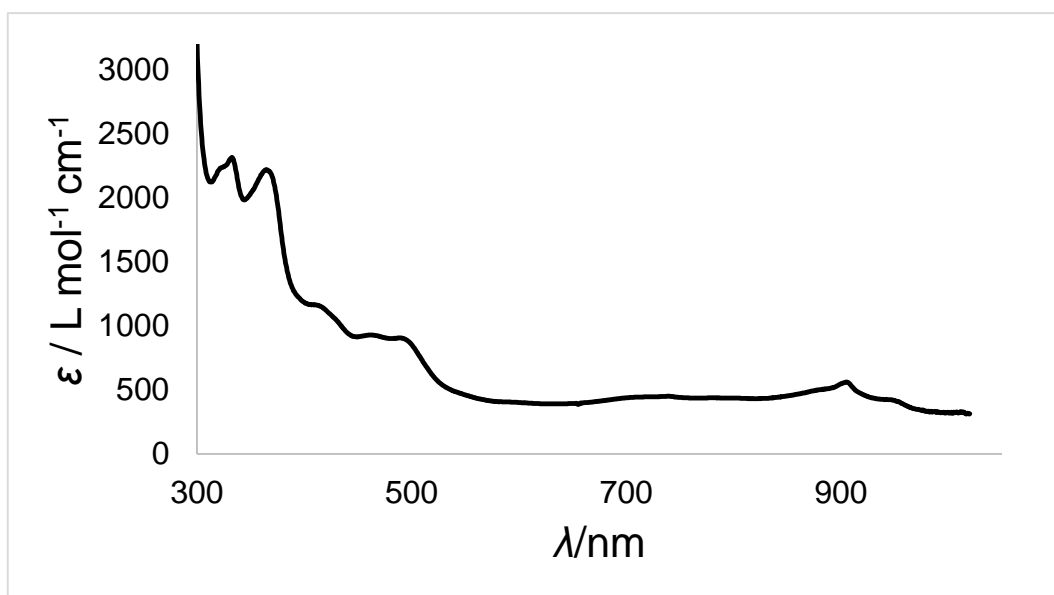

**Figure S23.** UV/Vis spectrum of  $[\text{K}\{18\text{c}6\}][\text{Fe}(\text{N}(\text{SiMe}_3)_2)_2(\text{bipy})]$  (**3**) in  $\text{Et}_2\text{O}$ .

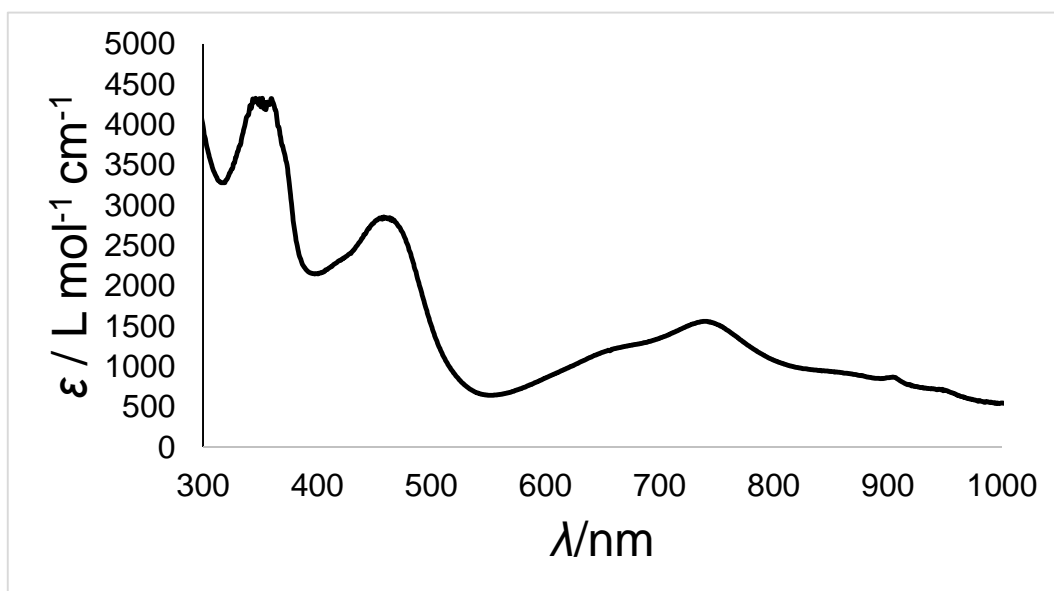

**Figure S24.** UV/Vis spectrum of  $[\text{K}\{18\text{c}6\}][\text{Co}(\text{N}(\text{SiMe}_3)_2)_2(\text{bipy})]$  (**4**) in  $\text{Et}_2\text{O}$ .

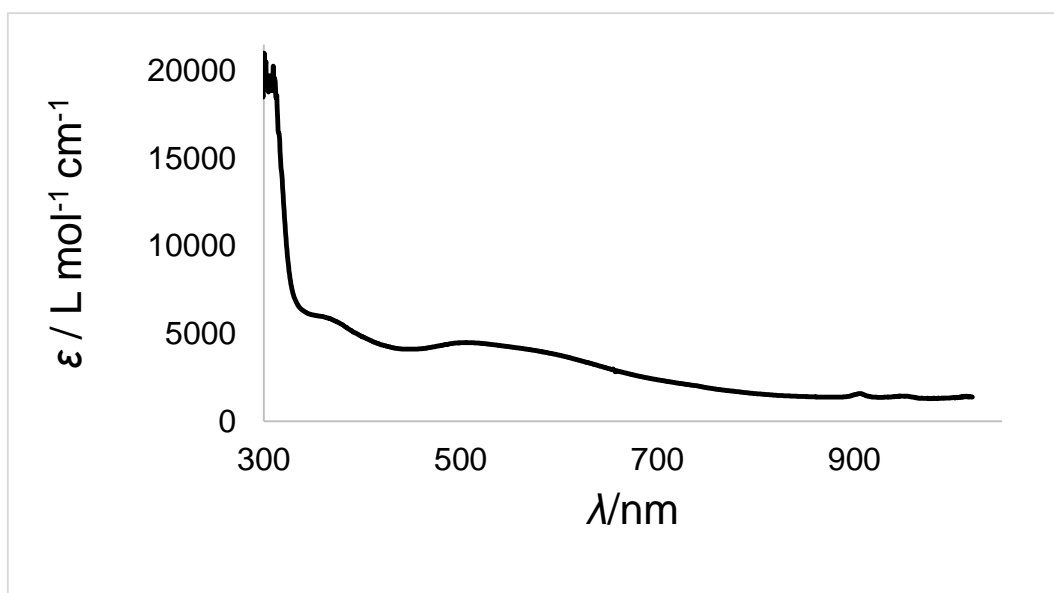

Figure S25. UV/Vis spectrum of [Cr(N(SiMe<sub>3</sub>)<sub>2</sub>)<sub>2</sub>(bipy)] (5) in Et<sub>2</sub>O.

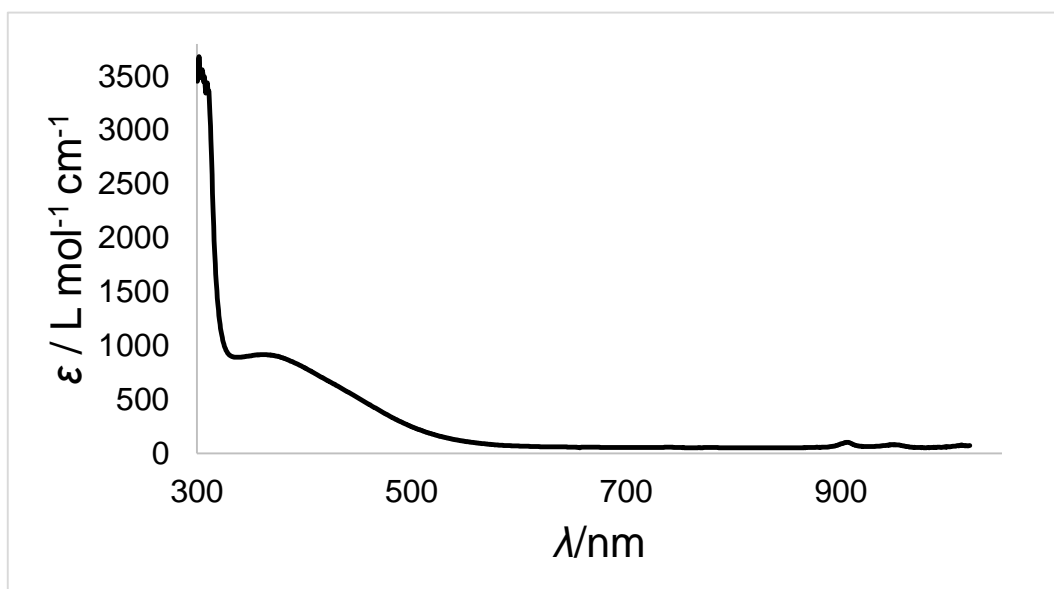

Figure S26. UV/Vis spectrum of [Mn(N(SiMe<sub>3</sub>)<sub>2</sub>)<sub>2</sub>(bipy)] (6) in Et<sub>2</sub>O.

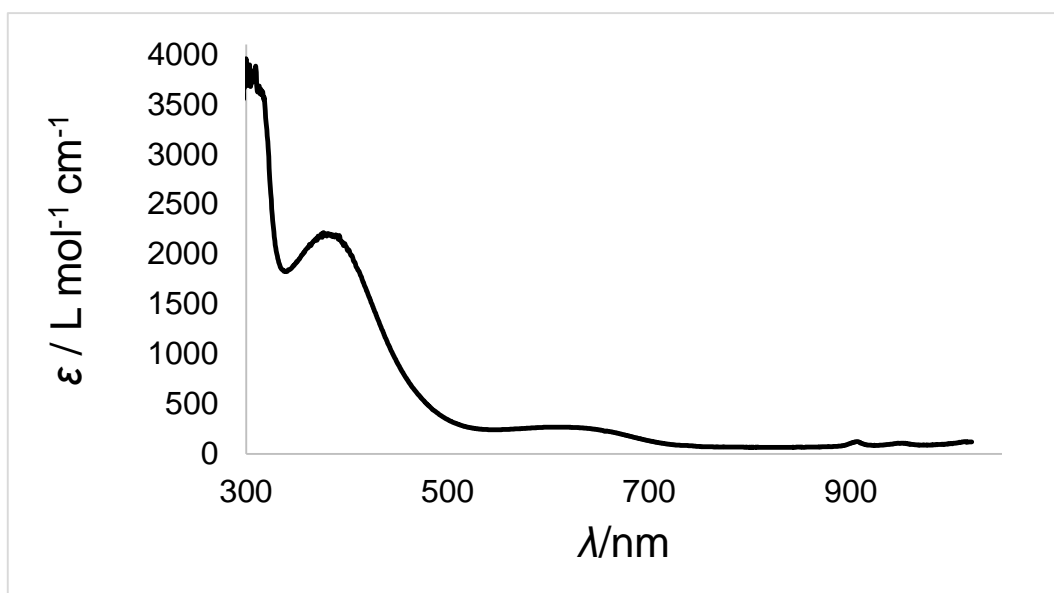

Figure S27. UV/Vis spectrum of [Fe(N(SiMe<sub>3</sub>)<sub>2</sub>)<sub>2</sub>(bipy)] (7) in Et<sub>2</sub>O.

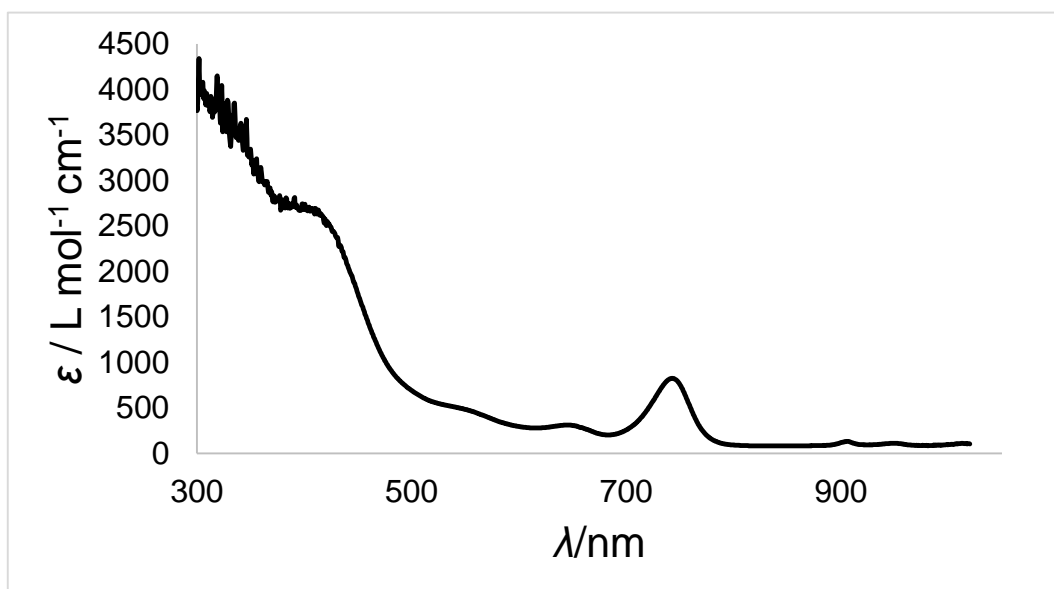

Figure S28. UV/Vis spectrum of [Co(N(SiMe<sub>3</sub>)<sub>2</sub>)<sub>2</sub>(bipy)] (8) in Et<sub>2</sub>O.

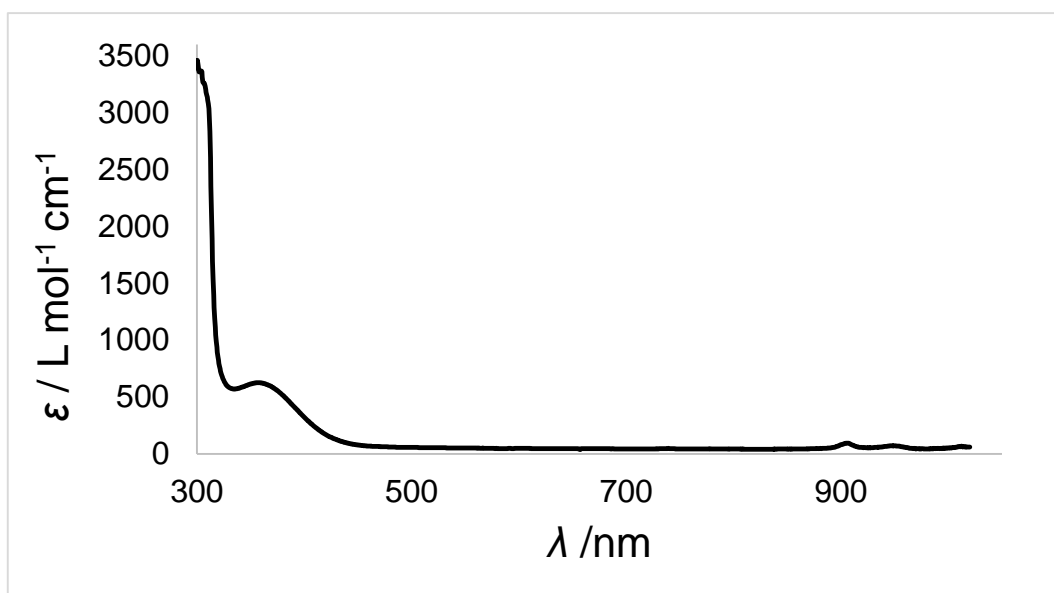

**Figure S29.** UV/Vis spectrum of [Zn(N(SiMe<sub>3</sub>)<sub>2</sub>)<sub>2</sub>(bipy)] (9) in Et<sub>2</sub>O.

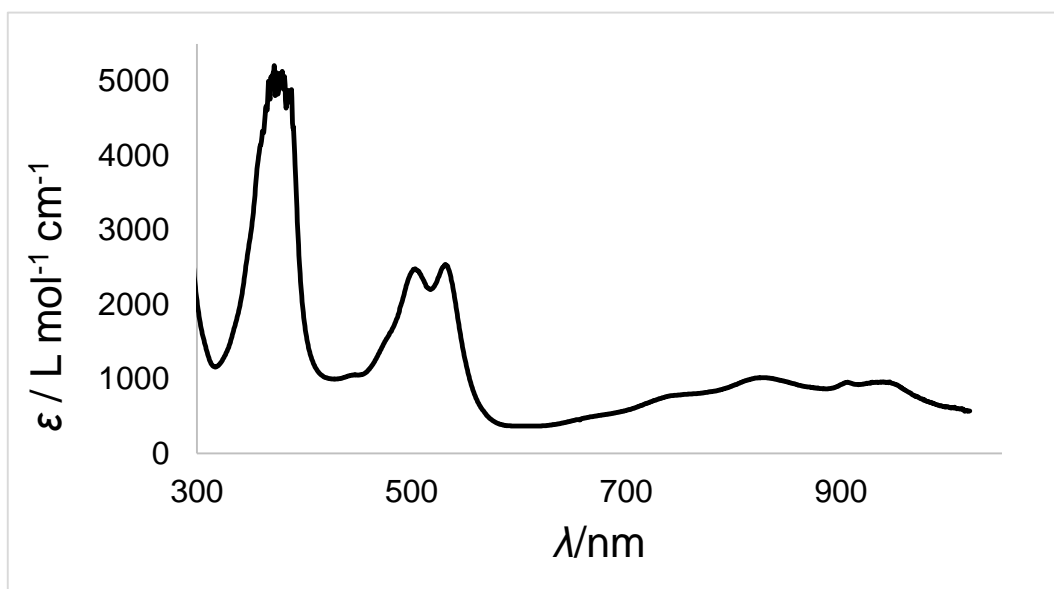

**Figure S30.** UV/Vis spectrum of [K{18c6}][Zn(N(SiMe<sub>3</sub>)<sub>2</sub>)<sub>2</sub>(bipy)] (10) in Et<sub>2</sub>O.

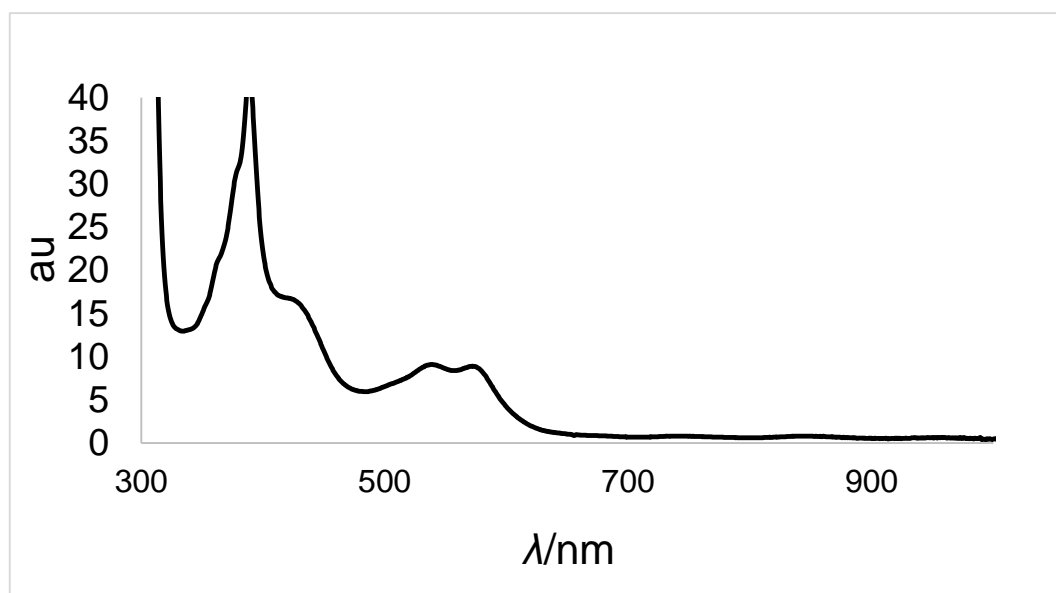

**Figure S31.** UV/Vis spectrum of  $[K\{18c6\}][(bipy)]$  in  $Et_2O$ .  $[K\{18c6\}][(bipy)]$  was obtained in-situ from a reaction of 2,2'-bipyridine with  $KCs$  in the presence of 18-crown-6 in  $Et_2O$ .

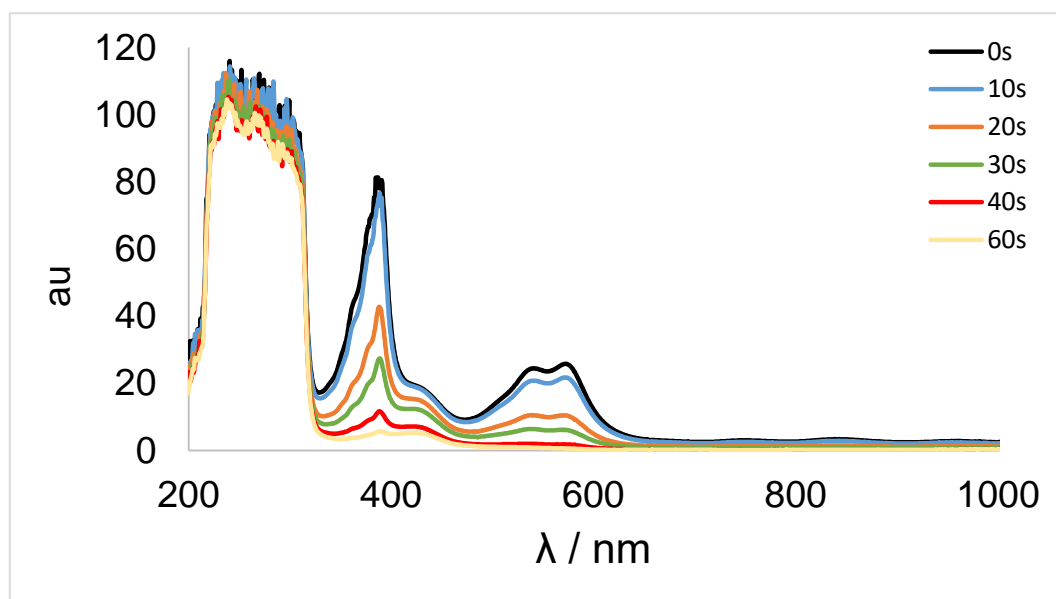

**Figure S32.** Time-dependent UV/Vis spectra of in-situ synthesized  $[K\{18c6\}][(bipy)]$  in  $Et_2O$ .

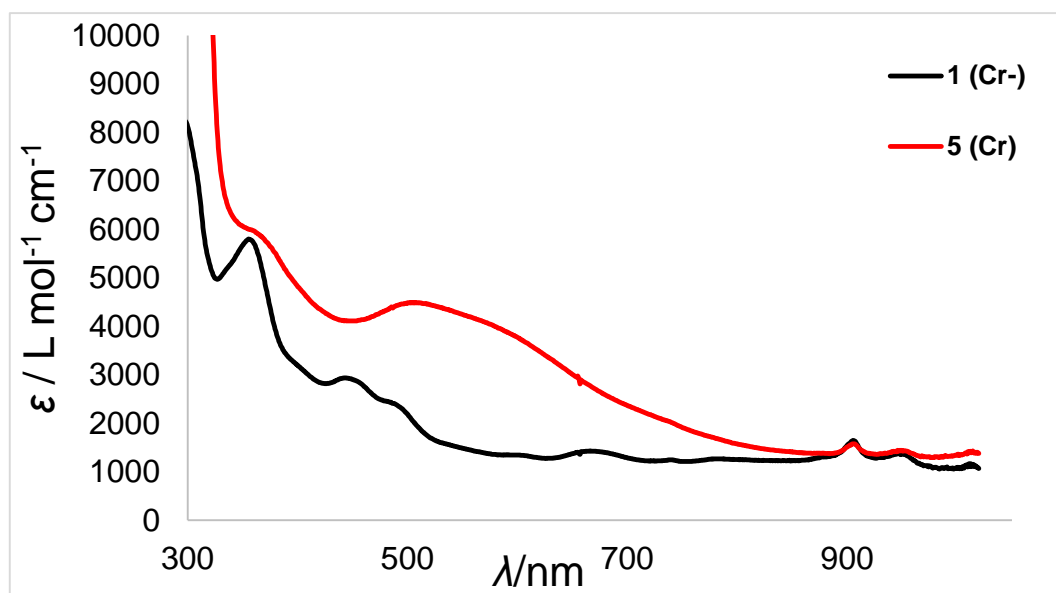

**Figure S33.** Overlay of UV/Vis spectra of  $[K\{18c6\}][Cr(N(SiMe_3)_2)_2(bipy)]$  (1) and  $[Cr(N(SiMe_3)_2)_2(bipy)]$  (5) in Et<sub>2</sub>O.

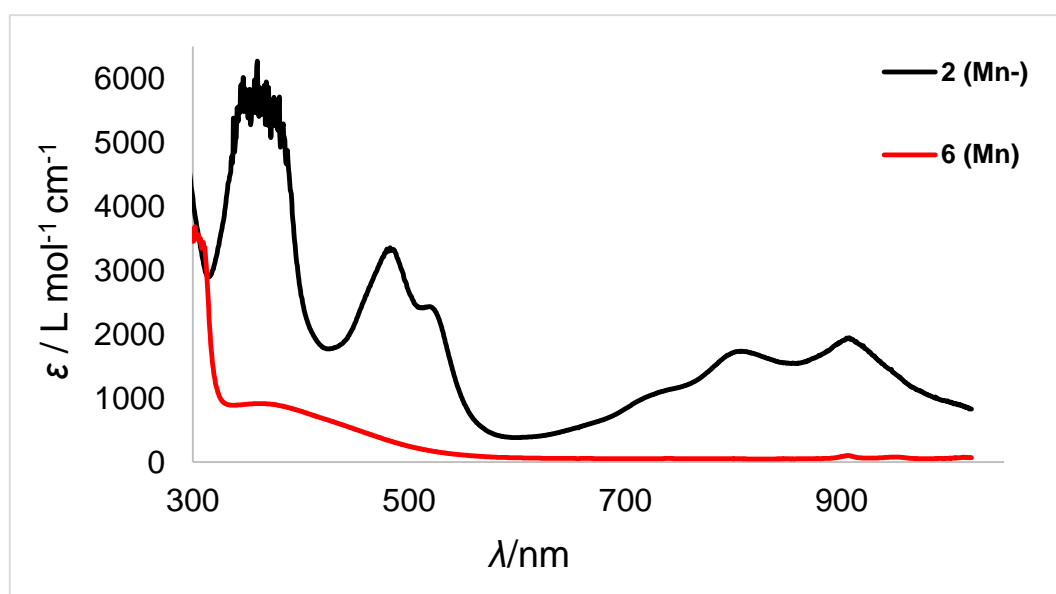

**Figure S34.** Overlay of UV/Vis spectra of  $[K\{18c6\}][Mn(N(SiMe_3)_2)_2(bipy)]$  (2) and  $[Mn(N(SiMe_3)_2)_2(bipy)]$  (6) in Et<sub>2</sub>O.

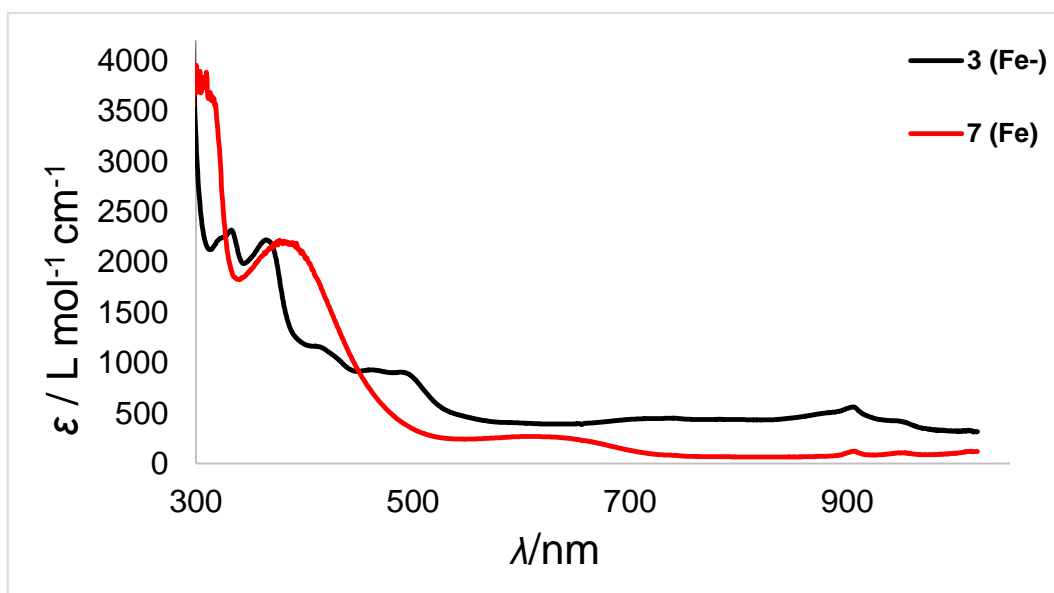

**Figure S35.** Overlay of UV/Vis spectra of  $[K\{18c6\}][Fe(N(SiMe_3)_2)_2(bipy)]$  (3) and  $[Fe(N(SiMe_3)_2)_2(bipy)]$  (7) in Et<sub>2</sub>O.

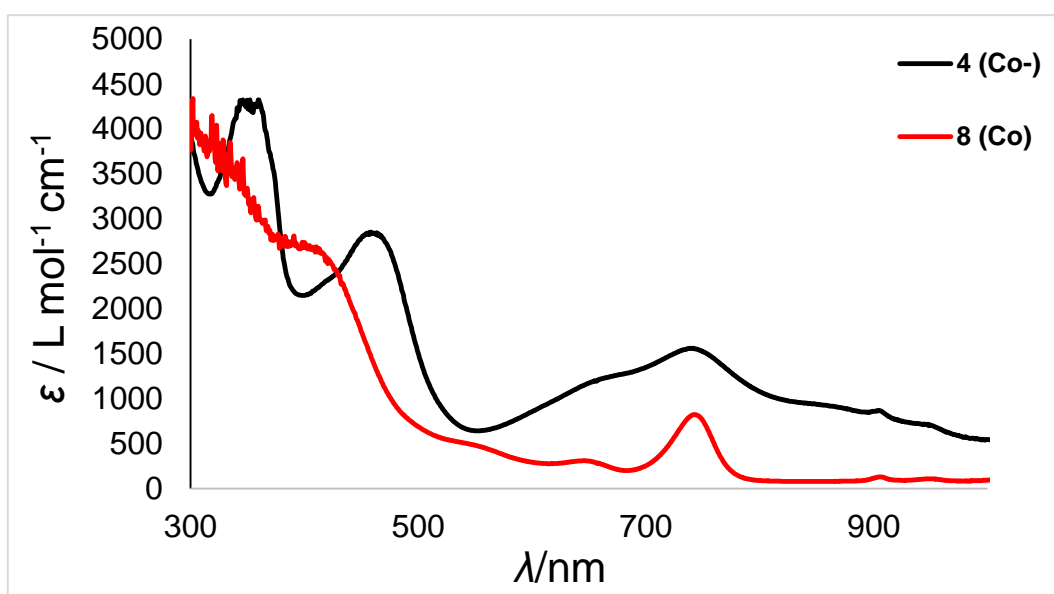

**Figure S36.** Overlay of UV/Vis spectra of  $[K\{18c6\}][Co(N(SiMe_3)_2)_2(bipy)]$  (4)  $[Co(N(SiMe_3)_2)_2(bipy)]$  (8) in Et<sub>2</sub>O.

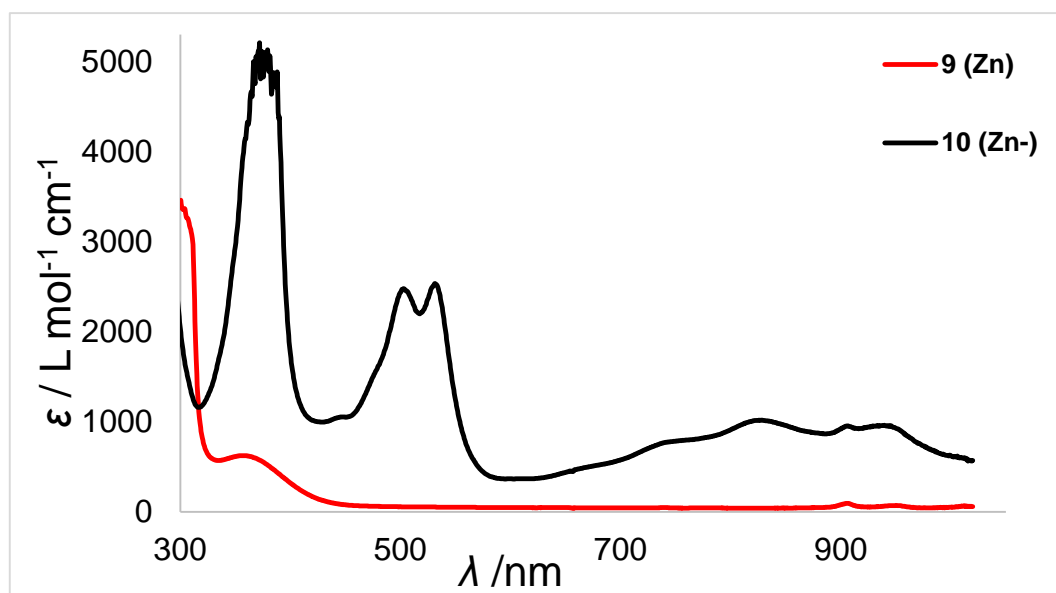

**Figure S37.** Overlay of UV/Vis spectra of  $[\text{Zn}(\text{N}(\text{SiMe}_3)_2)_2(\text{bipy})]$  (**9**) and  $[\text{K}\{18\text{c}6\}][\text{Zn}(\text{N}(\text{SiMe}_3)_2)_2(\text{bipy})]$  (**10**) in  $\text{Et}_2\text{O}$ .

#### 4. Magnetic Data

Magnetic data of compounds **1–4** and **10** were recorded on dried crystalline samples and were corrected for diamagnetic contributions from the sample holder and the diamagnetic susceptibility of the respective compound using Pascal constants. Obtained paramagnetic susceptibility  $\chi_{\text{para}}$  was fit using the Curie-Weiss-law  $\chi_{\text{CW}} = \left(\frac{N_A \mu_B^2 n_{\text{eff}}}{3k_B}\right)^2 \frac{1}{T - \theta}$  ( $n_{\text{eff}}$  = effective magnetic moment in Bohr's magnetons per formula unit,  $\theta$  = Weiss temperature) with contributions from a temperature independent paramagnetism  $\chi_{\text{TIP}}$  using the overall equation  $\chi_{\text{para}} T = (\chi_{\text{TIP}} + \chi_{\text{CW}}) T$ .

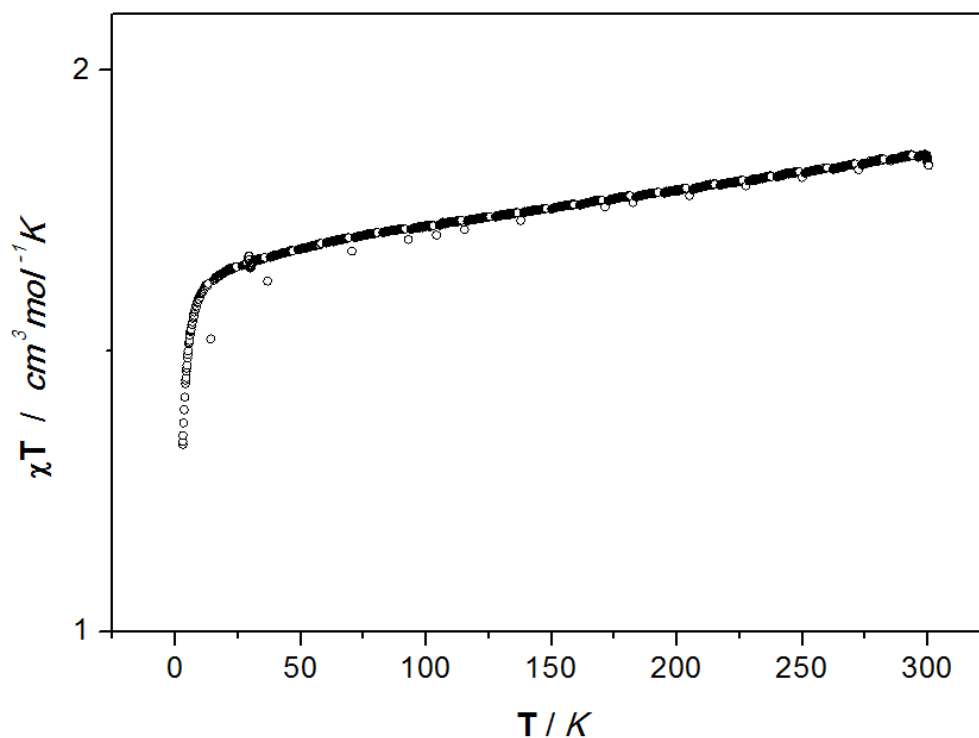

**Figure S38.** Temperature dependence of the molar magnetic susceptibility times temperature product ( $\chi T$  vs.  $T$ ) for compound  $K\{18c6\}[Cr(N(SiMe_3)_2)_2(bipy)]$  (1). Data were collected under an applied dc field of 1 T in a temperature range of 3 to 300 K.

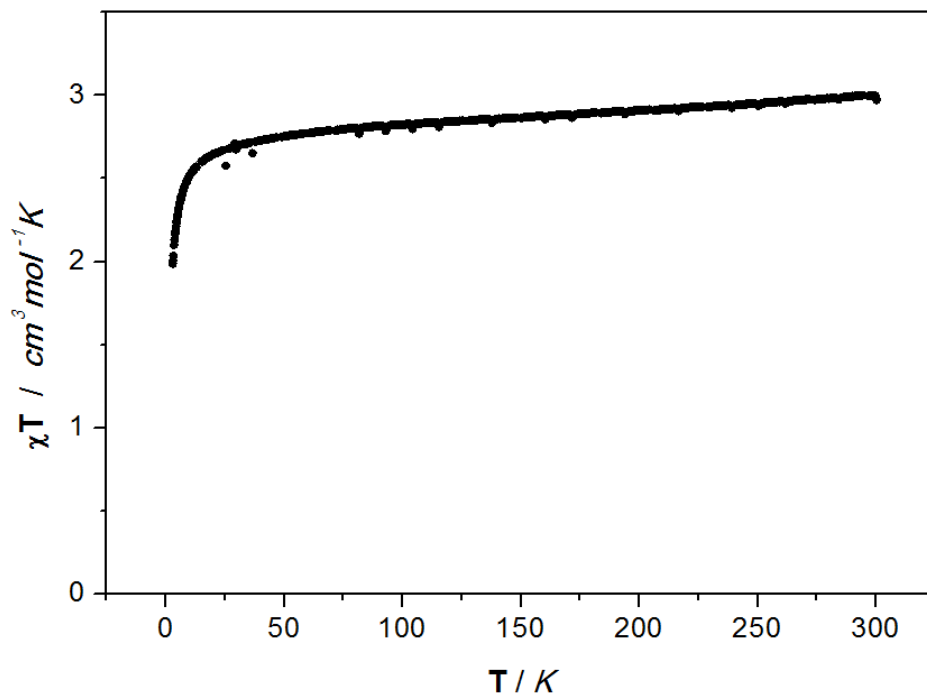

**Figure S39.** Temperature dependence of the molar magnetic susceptibility times temperature product ( $\chi T$  vs.  $T$ ) for compound  $K\{18c6\}[Mn(N(SiMe_3)_2)_2(bipy)]$  (2). Data was collected under an applied dc field of 1 T in a temperature range of 3 to 300 K.

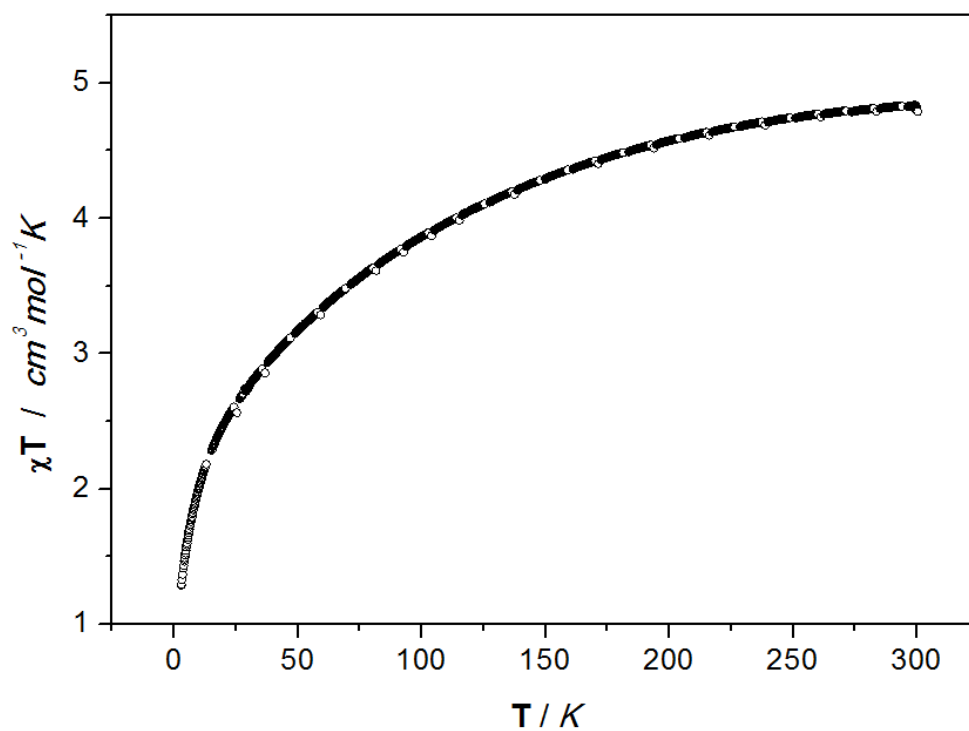

**Figure S40.** Temperature dependence of the molar magnetic susceptibility times temperature product ( $\chi T$  vs.  $T$ ) for compound  $K\{18c6\}[Fe(N(SiMe_3)_2)_2(bipy)]$  (**3**). Data was collected under an applied dc field of 1 T in a temperature range of 3 to 300 K.

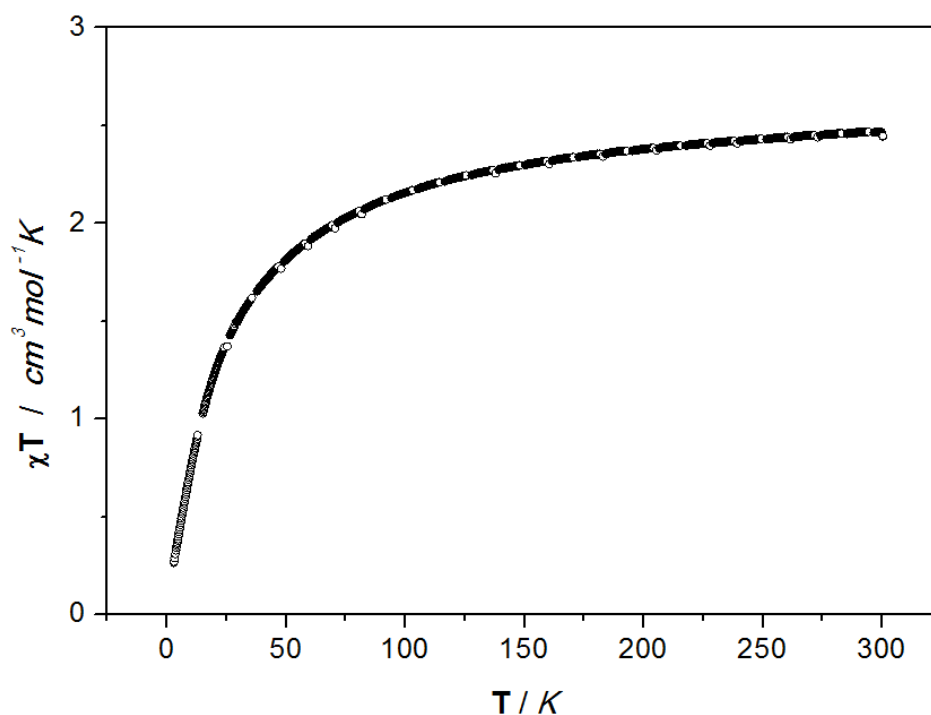

**Figure S41.** Temperature dependence of the molar magnetic susceptibility times temperature product ( $\chi T$  vs.  $T$ ) for compound  $K\{18c6\}[Co(N(SiMe_3)_2)_2(bipy)]$  (**4**). Data was collected under an applied dc field of 1 T in a temperature range of 3 to 300 K.

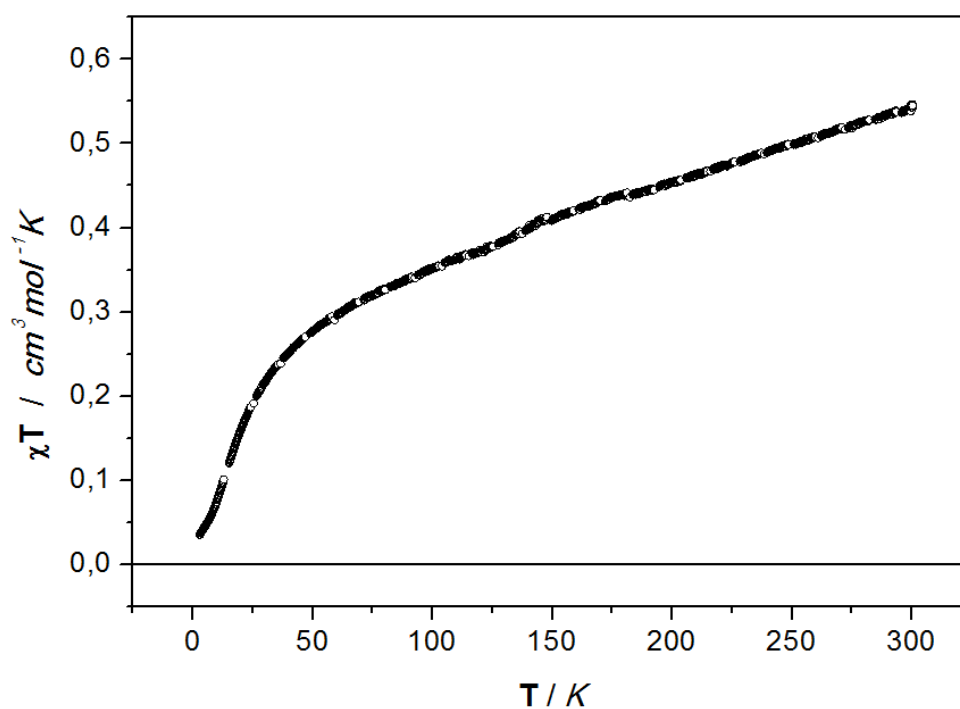

**Figure S42.** Temperature dependence of the molar magnetic susceptibility times temperature product ( $\chi T$  vs.  $T$ ) for compound  $K\{18c6\}[[Zn(N(SiMe_3)_2)_2(bipy)]]$  (**10**). Data was collected under an applied dc field of 1 T in a temperature range of 3 to 300 K.

## 5. Cyclic Voltammetry

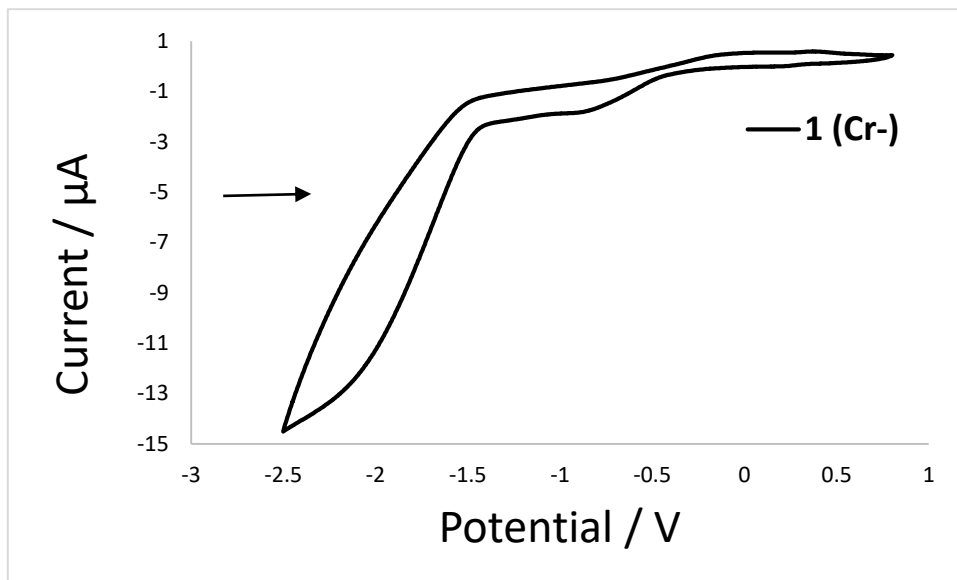

**Figure S33.** Cyclic voltammogram for complex **1** in THF (1 mM, 500 mV/s, 0.1 M  $[NBu_4][PF_6]$ ).

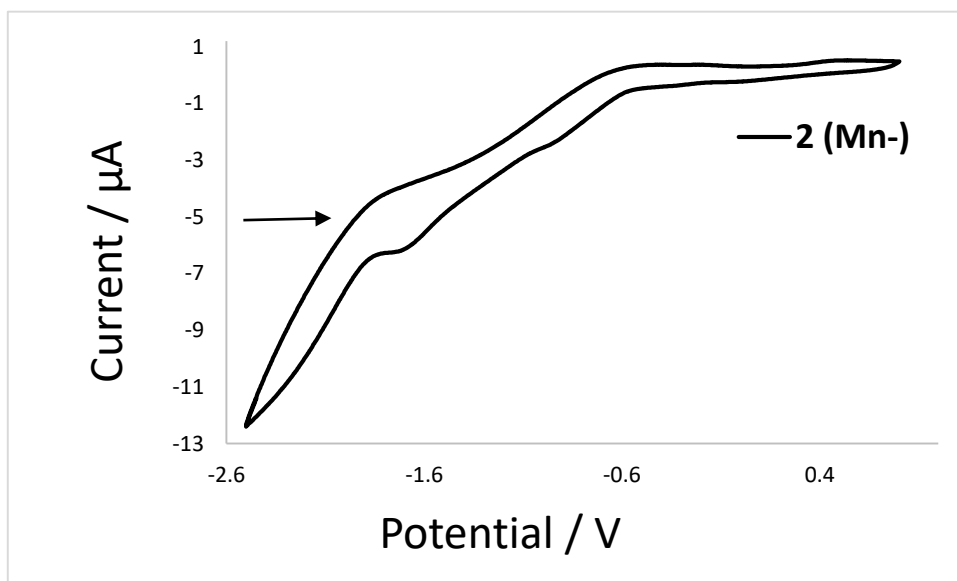

**Figure S44.** Cyclic voltammogram for complex **2** in THF (1 mM, 500 mV/s, 0.1 M  $[NBu_4][PF_6]$ ).

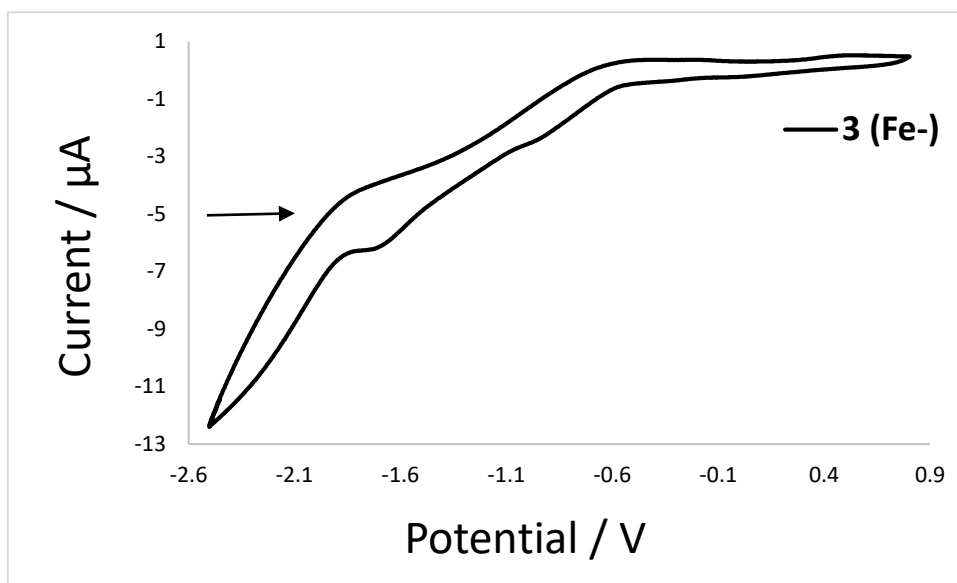

**Figure S44.** Cyclic voltammogram for complex 3 in THF (1 mM, 500 mV/s, 0.1 M  $[\text{NBu}_4][\text{PF}_6]$ ).

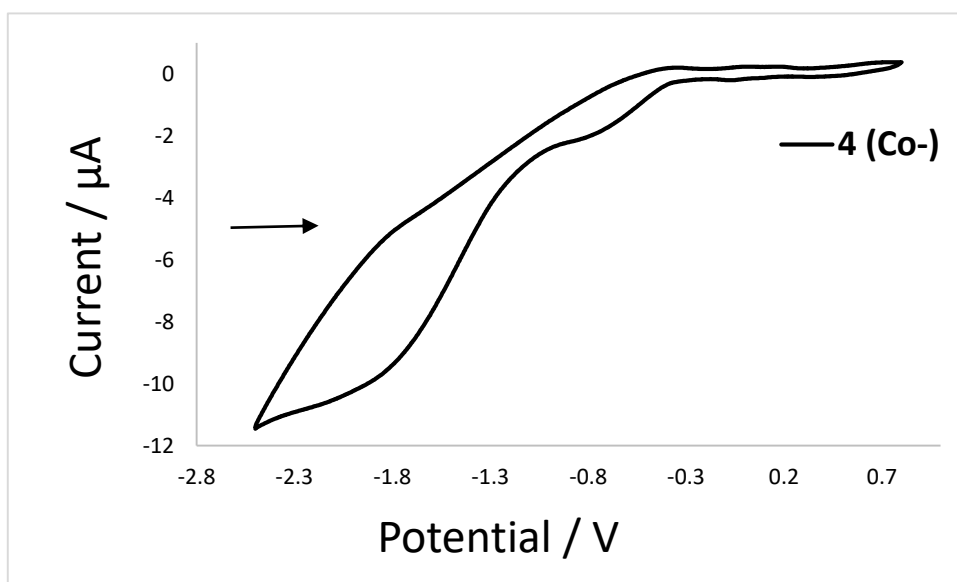

**Figure S46.** Cyclic voltammogram for complex 4 in THF (1 mM, 500 mV/s, 0.1 M  $[\text{NBu}_4][\text{PF}_6]$ ).

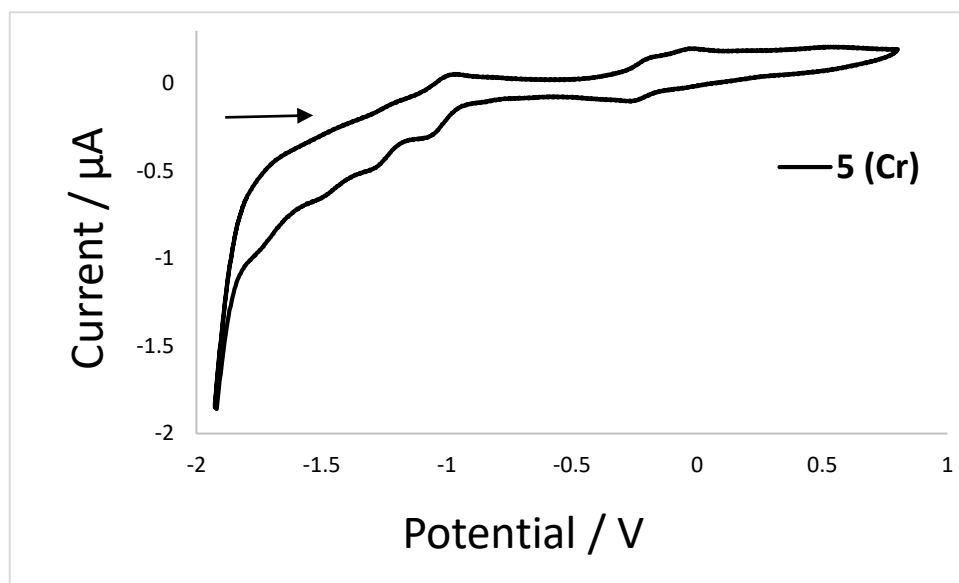

**Figure S47.** Cyclic voltammogram for complex 5 in THF (1 mM, 500 mV/s, 0.1 M  $[\text{NBu}_4][\text{PF}_6]$ ).

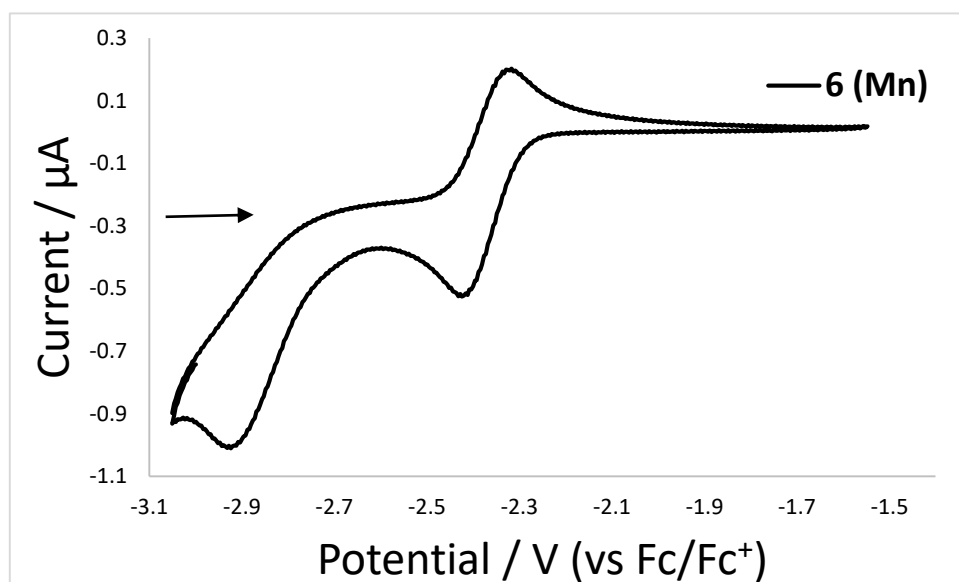

**Figure S48.** Cyclic voltammogram for complex 6 in THF (1 mM, 500 mV/s, 0.1 M  $[\text{NBu}_4][\text{PF}_6]$ ).

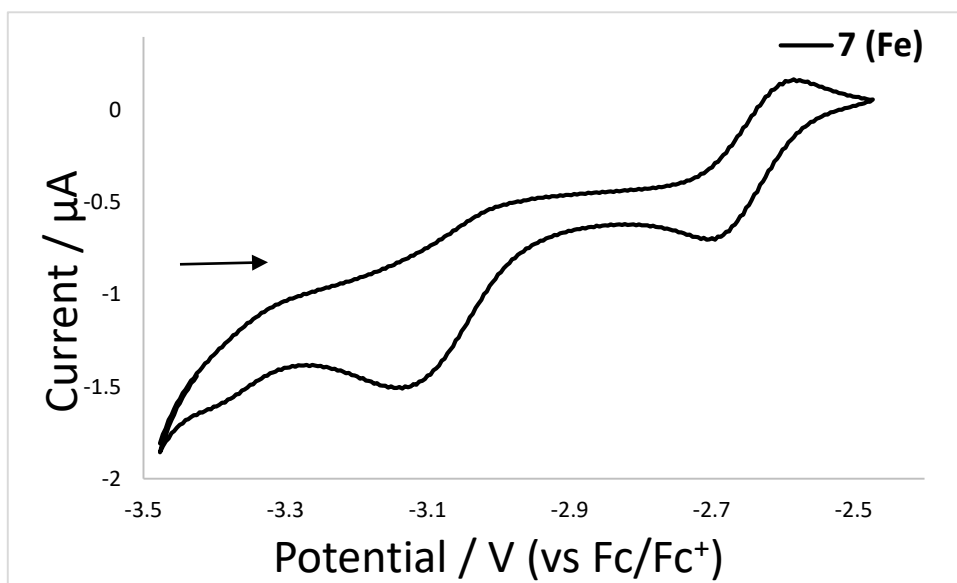

**Figure S49.** Cyclic voltammogram for complex 7 in THF (1 mM, 500 mV/s, 0.1 M [NBu<sub>4</sub>][PF<sub>6</sub>]).

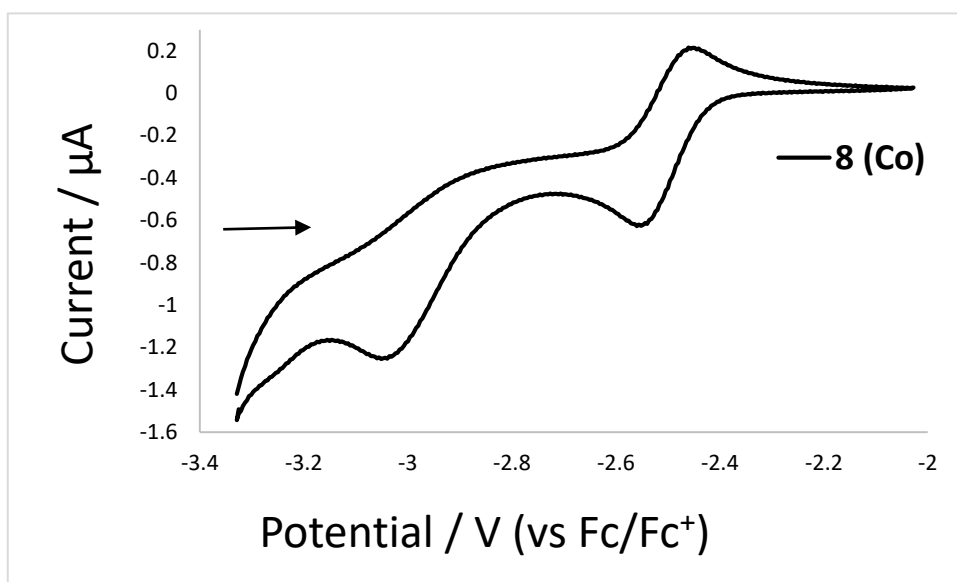

**Figure S50.** Cyclic voltammogram for complex 8 in THF (1 mM, 500 mV/s, 0.1 M [NBu<sub>4</sub>][PF<sub>6</sub>]).

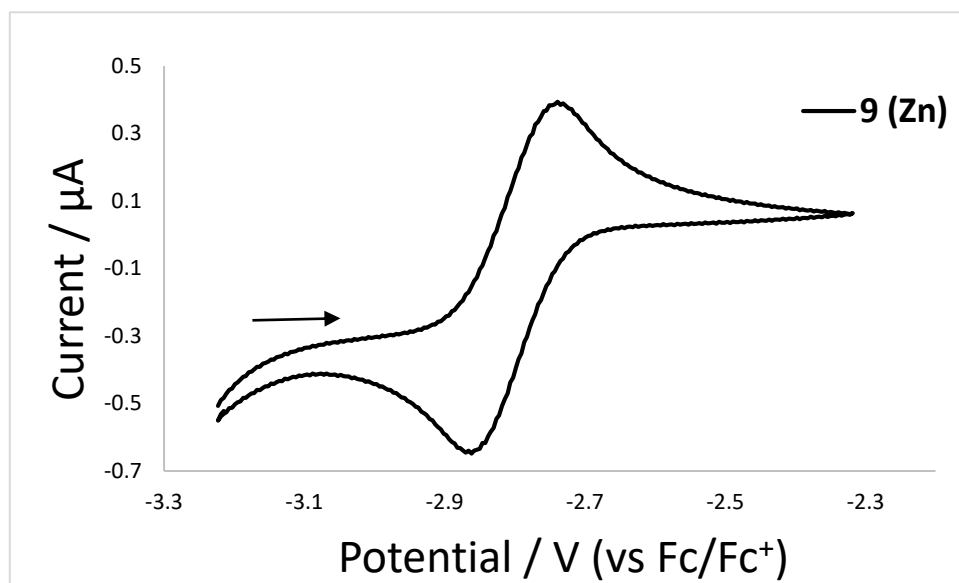

**Figure S51.** Cyclic voltammogram for complex **9** in THF (1 mM, 500 mV/s, 0.1 M [NBu<sub>4</sub>][PF<sub>6</sub>]).

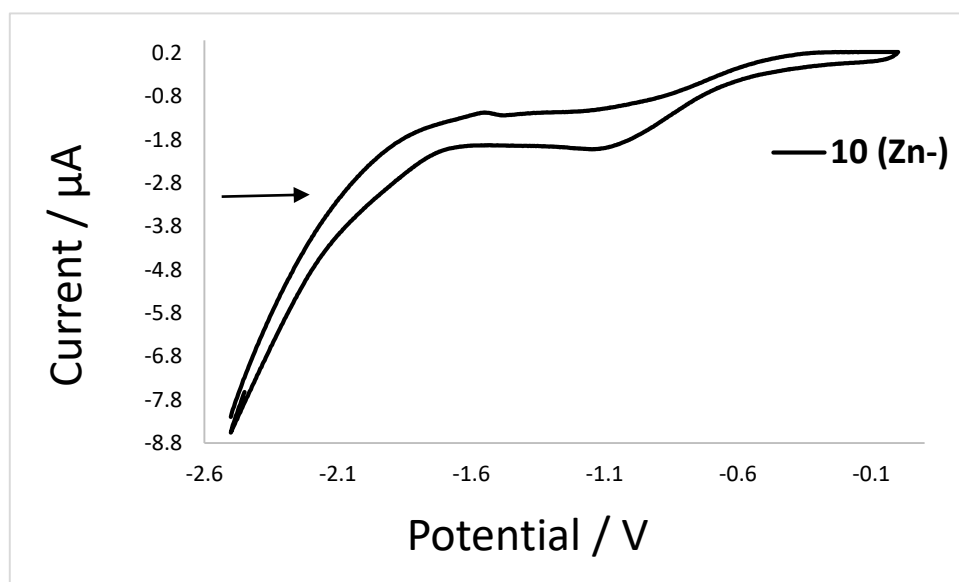

**Figure S52.** Cyclic voltammogram for complex **10** in THF (1 mM, 500 mV/s, 0.1 M [NBu<sub>4</sub>][PF<sub>6</sub>]).

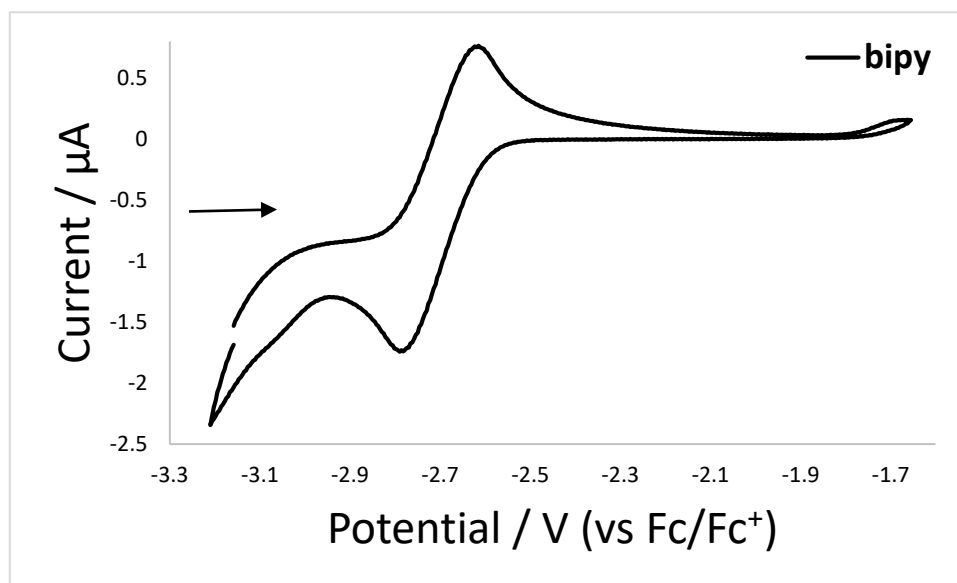

**Figure S53.** Cyclic voltammogram for 2,2'-bipyridine in THF (1 mM, 500 mV/s, 0.1 M [NBu<sub>4</sub>][PF<sub>6</sub>]).

## 6. X-Ray Diffraction Analysis and Molecular Structures

Data for **3** (CCDC 1918204), **4** (CCDC 1918205), **10** (CCDC 1918207) were collected at 100 K on a Bruker Quest D8 diffractometer using a graphite-monochromated Mo-K $\alpha$  radiation and equipped with an Oxford Instrument Cooler Device. Data for **8** (CCDC 1918202), **1** (CCDC 1918208), **9** (CCDC 1918206) was collected at 100 K a STOE IPDS2 diffractometer and data for **2** (CCDC 1918203) were collected at 100 K a STOE IPDS2T diffractometer using a graphite-monochromated Mo-K $\alpha$  radiation ( $\lambda = 0.71073$  Å) and equipped with an Oxford Cryosystems Cryostream Cooler Device. The structures have been solved using either OLEX SHELXT V2014/1 [1] and refined by means of least-squares procedures on a  $F^2$  with the aid of the program SHELXL-2016/6 [2] included in the software package WinGX version 1.63 [3] or using CRYSTALS [4].

The Atomic Scattering Factors were taken from International Tables for X-Ray Crystallography [5]. All non-hydrogen atoms were refined anisotropically. All hydrogens atoms were refined by using a riding model. Absorption corrections were introduced by using the MULTISCAN and X-Red program [6,7]. Drawings of molecules are performed with the program DIAMOND with 50% probability displacement ellipsoids for non-H atoms. Depiction of H atoms is omitted for clarity.

**Table S1.** Crystal data and structure refinement for **1**.

| Identification Code                                          | K(18c6)Cr5                                                                       |
|--------------------------------------------------------------|----------------------------------------------------------------------------------|
| Empirical formula                                            | C <sub>42</sub> H <sub>84</sub> CrKN <sub>4</sub> O <sub>8</sub> Si <sub>4</sub> |
| Formula weight                                               | 976.59                                                                           |
| Temperature/K                                                | 100.0                                                                            |
| Crystal system                                               | triclinic                                                                        |
| Space group                                                  | P-1                                                                              |
| <i>a</i> /Å                                                  | 11.6269(2)                                                                       |
| <i>b</i> /Å                                                  | 21.5546(4)                                                                       |
| <i>c</i> /Å                                                  | 21.8560(4)                                                                       |
| $\alpha$ /°                                                  | 95.633(2)                                                                        |
| $\beta$ /°                                                   | 89.8920(10)                                                                      |
| $\gamma$ /°                                                  | 90.377(2)                                                                        |
| Volume/Å <sup>3</sup>                                        | 5450.83(17)                                                                      |
| <i>Z</i>                                                     | 4                                                                                |
| $\rho_{\text{calc}}$ g/cm <sup>3</sup>                       | 1.190                                                                            |
| $\mu$ /mm <sup>-1</sup>                                      | 0.422                                                                            |
| <i>F</i> (000)                                               | 2108.0                                                                           |
| Crystal size/mm <sup>3</sup>                                 | 0.3494 × 0.2903 × 0.2027                                                         |
| Radiation                                                    | Mo-K $\alpha$ ( $\lambda$ = 0.71073)                                             |
| 2 $\theta$ range for data collection/°                       | 3.504 to 50                                                                      |
| Index ranges                                                 | −13 ≤ <i>h</i> ≤ 13, −25 ≤ <i>k</i> ≤ 25, −25 ≤ <i>l</i> ≤ 25                    |
| Reflections collected                                        | 88325                                                                            |
| Independent reflections                                      | 19148 [ <i>R</i> <sub>int</sub> = 0.0630, <i>R</i> <sub>sigma</sub> = 0.0368]    |
| Data/restraints/parameters                                   | 19148/0/1112                                                                     |
| Goodness-of-fit on <i>F</i> <sup>2</sup>                     | 1.073                                                                            |
| Final <i>R</i> indexes [ <i>I</i> ≥ 2 $\sigma$ ( <i>I</i> )] | <i>R</i> <sub>1</sub> = 0.0512, <i>wR</i> <sub>2</sub> = 0.1293                  |
| Final <i>R</i> indexes [all data]                            | <i>R</i> <sub>1</sub> = 0.0571, <i>wR</i> <sub>2</sub> = 0.1323                  |
| Largest diff. peak/hole/e Å <sup>-3</sup>                    | 0.79/−0.47                                                                       |

**Table S2.** Crystal data and structure refinement for **2**. The structure was refined as an inversion twin, twin ratio refined to 0.085(13).

| Identification Code                                          | K(18c6)Mn6                                                                       |
|--------------------------------------------------------------|----------------------------------------------------------------------------------|
| Empirical formula                                            | C <sub>34</sub> H <sub>68</sub> KMnN <sub>4</sub> O <sub>6</sub> Si <sub>4</sub> |
| Formula weight                                               | 835.32                                                                           |
| Temperature/K                                                | 100.0                                                                            |
| Crystal system                                               | monoclinic                                                                       |
| Space group                                                  | C2                                                                               |
| <i>a</i> /Å                                                  | 34.8403(17)                                                                      |
| <i>b</i> /Å                                                  | 18.4715(11)                                                                      |
| <i>c</i> /Å                                                  | 14.5302(8)                                                                       |
| $\alpha$ /°                                                  | 90                                                                               |
| $\beta$ /°                                                   | 96.555(4)                                                                        |
| $\gamma$ /°                                                  | 90                                                                               |
| Volume/Å <sup>3</sup>                                        | 9289.8(9)                                                                        |
| <i>Z</i>                                                     | 8                                                                                |
| $\rho_{\text{calc}}$ g/cm <sup>3</sup>                       | 1.194                                                                            |
| $\mu$ /mm <sup>−1</sup>                                      | 0.518                                                                            |
| <i>F</i> (000)                                               | 3584.0                                                                           |
| Crystal size/mm <sup>3</sup>                                 | 0.27 × 0.18 × 0.07                                                               |
| Radiation                                                    | Mo-K $\alpha$ ( $\lambda$ = 0.71073)                                             |
| 2 $\theta$ range for data collection/°                       | 3.668 to 54.998                                                                  |
| Index ranges                                                 | −45 ≤ <i>h</i> ≤ 43, −24 ≤ <i>k</i> ≤ 24, −18 ≤ <i>l</i> ≤ 18                    |
| Reflections collected                                        | 52126                                                                            |
| Independent reflections                                      | 21354 [ <i>R</i> <sub>int</sub> = 0.0285, <i>R</i> <sub>sigma</sub> = 0.0488]    |
| Data/restraints/parameters                                   | 21354/1546/1264                                                                  |
| Goodness-of-fit on <i>F</i> <sup>2</sup>                     | 0.917                                                                            |
| Final <i>R</i> indexes [ <i>I</i> ≥ 2 $\sigma$ ( <i>I</i> )] | <i>R</i> <sub>1</sub> = 0.0376, <i>wR</i> <sub>2</sub> = 0.0780                  |
| Final <i>R</i> indexes [all data]                            | <i>R</i> <sub>1</sub> = 0.0521, <i>wR</i> <sub>2</sub> = 0.0815                  |
| Largest diff. peak/hole / e Å <sup>−3</sup>                  | 0.81/−0.39                                                                       |

**Table 3.** Crystal data and structure refinement for **3**.

| Identification Code                                          | K(18c6)Fe7                                                                       |
|--------------------------------------------------------------|----------------------------------------------------------------------------------|
| Empirical formula                                            | C <sub>42</sub> H <sub>83</sub> FeKN <sub>4</sub> O <sub>8</sub> Si <sub>4</sub> |
| Formula weight                                               | 978.61                                                                           |
| Temperature/K                                                | 100.0                                                                            |
| Crystal system                                               | triclinic                                                                        |
| Space group                                                  | P-1                                                                              |
| <i>a</i> /Å                                                  | 10.8613(5)                                                                       |
| <i>b</i> /Å                                                  | 13.2627(6)                                                                       |
| <i>c</i> /Å                                                  | 19.8669(9)                                                                       |
| $\alpha$ /°                                                  | 77.5970(10)                                                                      |
| $\beta$ /°                                                   | 80.062(2)                                                                        |
| $\gamma$ /°                                                  | 83.452(2)                                                                        |
| Volume/Å <sup>3</sup>                                        | 2744.3(2)                                                                        |
| <i>Z</i>                                                     | 2                                                                                |
| $\rho_{\text{calc}}$ g/cm <sup>3</sup>                       | 1.184                                                                            |
| $\mu$ /mm <sup>-1</sup>                                      | 0.485                                                                            |
| <i>F</i> (000)                                               | 1055.0                                                                           |
| Crystal size/mm <sup>3</sup>                                 | 0.21 × 0.2 × 0.11                                                                |
| Radiation                                                    | Mo-K $\alpha$ ( $\lambda$ = 0.71073)                                             |
| 2 $\theta$ range for data collection/°                       | 4.646 to 55.124                                                                  |
| Index ranges                                                 | −14 ≤ <i>h</i> ≤ 14, −17 ≤ <i>k</i> ≤ 17, −25 ≤ <i>l</i> ≤ 25                    |
| Reflections collected                                        | 103782                                                                           |
| Independent reflections                                      | 12642 [ <i>R</i> <sub>int</sub> = 0.0332, <i>R</i> <sub>sigma</sub> = 0.0201]    |
| Data/restraints/parameters                                   | 12642/276/683                                                                    |
| Goodness-of-fit on <i>F</i> <sup>2</sup>                     | 1.054                                                                            |
| Final <i>R</i> indexes [ <i>I</i> ≥ 2 $\sigma$ ( <i>I</i> )] | <i>R</i> <sub>1</sub> = 0.0279, <i>wR</i> <sub>2</sub> = 0.0618                  |
| Final <i>R</i> indexes [all data]                            | <i>R</i> <sub>1</sub> = 0.0383, <i>wR</i> <sub>2</sub> = 0.0658                  |
| Largest diff. peak/hole/e Å <sup>-3</sup>                    | 0.34/−0.24                                                                       |

**Table S4.** Crystal data and structure refinement for **4**.

| Identification Code                                          | K(18c6)Co8                                                                       |
|--------------------------------------------------------------|----------------------------------------------------------------------------------|
| Empirical formula                                            | C <sub>42</sub> H <sub>84</sub> CoKN <sub>4</sub> O <sub>8</sub> Si <sub>4</sub> |
| Formula weight                                               | 983.52                                                                           |
| Temperature/K                                                | 100.0                                                                            |
| Crystal system                                               | triclinic                                                                        |
| Space group                                                  | P-1                                                                              |
| <i>a</i> /Å                                                  | 10.8097(5)                                                                       |
| <i>b</i> /Å                                                  | 13.2648(6)                                                                       |
| <i>c</i> /Å                                                  | 19.9051(10)                                                                      |
| $\alpha$ /°                                                  | 77.712(2)                                                                        |
| $\beta$ /°                                                   | 80.199(2)                                                                        |
| $\gamma$ /°                                                  | 83.606(2)                                                                        |
| Volume/Å <sup>3</sup>                                        | 2739.7(2)                                                                        |
| <i>Z</i>                                                     | 2                                                                                |
| $\rho_{\text{calc}}$ g/cm <sup>3</sup>                       | 1.192                                                                            |
| $\mu$ /mm <sup>-1</sup>                                      | 0.524                                                                            |
| <i>F</i> (000)                                               | 1060.0                                                                           |
| Crystal size / mm <sup>3</sup>                               | 0.23 × 0.14 × 0.07                                                               |
| Radiation                                                    | Mo-K $\alpha$ ( $\lambda$ = 0.71073)                                             |
| 2 $\theta$ range for data collection/°                       | 4.238 to 55.058                                                                  |
| Index ranges                                                 | −14 ≤ <i>h</i> ≤ 14, −16 ≤ <i>k</i> ≤ 17, −25 ≤ <i>l</i> ≤ 25                    |
| Reflections collected                                        | 89930                                                                            |
| Independent reflections                                      | 12549 [ <i>R</i> <sub>int</sub> = 0.0853, <i>R</i> <sub>sigma</sub> = 0.0565]    |
| Data/restraints/parameters                                   | 12549/57/584                                                                     |
| Goodness-of-fit on <i>F</i> <sup>2</sup>                     | 1.017                                                                            |
| Final <i>R</i> indexes [ <i>I</i> ≥ 2 $\sigma$ ( <i>I</i> )] | <i>R</i> <sub>1</sub> = 0.0420, <i>wR</i> <sub>2</sub> = 0.0739                  |
| Final <i>R</i> indexes [all data]                            | <i>R</i> <sub>1</sub> = 0.0780, <i>wR</i> <sub>2</sub> = 0.0831                  |
| Largest diff. peak/hole/e Å <sup>-3</sup>                    | 0.29/−0.49                                                                       |

**Table S5.** Crystal data and structure refinement for 8. The structure was refined as an inversion twin, twin ratio refined to 0.495(10).

| Identification Code                                          | Co4                                                                            |
|--------------------------------------------------------------|--------------------------------------------------------------------------------|
| Empirical formula                                            | C <sub>44</sub> H <sub>88</sub> Co <sub>2</sub> N <sub>8</sub> Si <sub>8</sub> |
| Formula weight                                               | 1071.80                                                                        |
| Temperature/K                                                | 100                                                                            |
| Crystal system                                               | orthorhombic                                                                   |
| Space group                                                  | Pca2 <sub>1</sub>                                                              |
| <i>a</i> /Å                                                  | 18.7674(9)                                                                     |
| <i>b</i> /Å                                                  | 18.1030(8)                                                                     |
| <i>c</i> /Å                                                  | 17.5930(7)                                                                     |
| $\alpha$ /°                                                  | 90                                                                             |
| $\beta$ /°                                                   | 90                                                                             |
| $\gamma$ /°                                                  | 90                                                                             |
| Volume/Å <sup>3</sup>                                        | 5977.2(5)                                                                      |
| <i>Z</i>                                                     | 4                                                                              |
| $\rho_{\text{calc}}$ g/cm <sup>3</sup>                       | 1.191                                                                          |
| $\mu$ /mm <sup>-1</sup>                                      | 0.751                                                                          |
| <i>F</i> (000)                                               | 2296.0                                                                         |
| Crystal size/mm <sup>3</sup>                                 | 0.31 × 0.2 × 0.2                                                               |
| Radiation                                                    | Mo K $\alpha$ ( $\lambda$ = 0.71073)                                           |
| 2 $\theta$ range for data collection/°                       | 3.89 to 51.998                                                                 |
| Index ranges                                                 | −23 ≤ <i>h</i> ≤ 21, −19 ≤ <i>k</i> ≤ 22, −19 ≤ <i>l</i> ≤ 21                  |
| Reflections collected                                        | 20518                                                                          |
| Independent reflections                                      | 10939 [ <i>R</i> <sub>int</sub> = 0.0219, <i>R</i> <sub>sigma</sub> = 0.0228]  |
| Data/restraints/parameters                                   | 10939/1/588                                                                    |
| Goodness-of-fit on <i>F</i> <sup>2</sup>                     | 1.014                                                                          |
| Final <i>R</i> indexes [ <i>I</i> ≥ 2 $\sigma$ ( <i>I</i> )] | <i>R</i> <sub>1</sub> = 0.0280, <i>wR</i> <sub>2</sub> = 0.0670                |
| Final <i>R</i> indexes [all data]                            | <i>R</i> <sub>1</sub> = 0.0307, <i>wR</i> <sub>2</sub> = 0.0679                |
| Largest diff. peak/hole/e Å <sup>-3</sup>                    | 0.45/−0.25                                                                     |

**Table S6.** Crystal data and structure refinement for **9**. The structure was refined as an inversion twin, twin ratio refined to 0.292(9).

| Identification Code                                          | Zn9                                                                            |
|--------------------------------------------------------------|--------------------------------------------------------------------------------|
| Empirical formula                                            | C <sub>44</sub> H <sub>88</sub> N <sub>8</sub> Si <sub>8</sub> Zn <sub>2</sub> |
| Formula weight                                               | 1084.68                                                                        |
| Temperature/K                                                | 100                                                                            |
| Crystal system                                               | orthorhombic                                                                   |
| Space group                                                  | Pca2 <sub>1</sub>                                                              |
| <i>a</i> /Å                                                  | 18.8806(12)                                                                    |
| <i>b</i> /Å                                                  | 18.0560(13)                                                                    |
| <i>c</i> /Å                                                  | 17.6133(17)                                                                    |
| $\alpha$ /°                                                  | 90                                                                             |
| $\beta$ /°                                                   | 90                                                                             |
| $\gamma$ /°                                                  | 90                                                                             |
| Volume / Å <sup>3</sup>                                      | 6004.5(8)                                                                      |
| <i>Z</i>                                                     | 4                                                                              |
| $\rho_{\text{calc}}$ g/cm <sup>3</sup>                       | 1.200                                                                          |
| $\mu$ /mm <sup>−1</sup>                                      | 0.994                                                                          |
| <i>F</i> (000)                                               | 2320.0                                                                         |
| Crystal size/mm <sup>3</sup>                                 | 0.254 × 0.189 × 0.085                                                          |
| Radiation                                                    | Mo-K $\alpha$ ( $\lambda$ = 0.71073)                                           |
| 2 $\theta$ range for data collection/°                       | 4.314 to 51.996                                                                |
| Index ranges                                                 | −23 ≤ <i>h</i> ≤ 23, −21 ≤ <i>k</i> ≤ 22, −21 ≤ <i>l</i> ≤ 21                  |
| Reflections collected                                        | 52603                                                                          |
| Independent reflections                                      | 11789 [ <i>R</i> <sub>int</sub> = 0.0737, <i>R</i> <sub>sigma</sub> = 0.0589]  |
| Data/restraints/parameters                                   | 11789/1/584                                                                    |
| Goodness-of-fit on <i>F</i> <sup>2</sup>                     | 0.969                                                                          |
| Final <i>R</i> indexes [ <i>I</i> ≥ 2 $\sigma$ ( <i>I</i> )] | <i>R</i> <sub>1</sub> = 0.0340, <i>wR</i> <sub>2</sub> = 0.0700                |
| Final <i>R</i> indexes [all data]                            | <i>R</i> <sub>1</sub> = 0.0445, <i>wR</i> <sub>2</sub> = 0.0718                |
| Largest diff. peak/hole/e Å <sup>−3</sup>                    | 0.58/−0.21                                                                     |

**Table S7.** Crystal data and structure refinement for **10**.

| Identification Code                                          | <b>K(18c6)Zn10</b>                                                                |
|--------------------------------------------------------------|-----------------------------------------------------------------------------------|
| Empirical formula                                            | C <sub>38</sub> H <sub>78</sub> KN <sub>4</sub> O <sub>7</sub> Si <sub>4</sub> Zn |
| Formula weight                                               | 919.87                                                                            |
| Temperature/K                                                | 100.0                                                                             |
| Crystal system                                               | monoclinic                                                                        |
| Space group                                                  | P2 <sub>1</sub> /c                                                                |
| <i>a</i> /Å                                                  | 12.1899(7)                                                                        |
| <i>b</i> /Å                                                  | 18.4365(10)                                                                       |
| <i>c</i> /Å                                                  | 22.8273(13)                                                                       |
| $\alpha$ /°                                                  | 90                                                                                |
| $\beta$ /°                                                   | 95.423(2)                                                                         |
| $\gamma$ /°                                                  | 90                                                                                |
| Volume/Å <sup>3</sup>                                        | 5107.2(5)                                                                         |
| <i>Z</i>                                                     | 4                                                                                 |
| $\rho_{\text{calc}}$ g/cm <sup>3</sup>                       | 1.196                                                                             |
| $\mu$ /mm <sup>−1</sup>                                      | 0.700                                                                             |
| <i>F</i> (000)                                               | 1980.0                                                                            |
| Crystal size / mm <sup>3</sup>                               | 0.492 × 0.383 × 0.15                                                              |
| Radiation                                                    | Mo K $\alpha$ ( $\lambda$ = 0.71073)                                              |
| 2 $\theta$ range for data collection/°                       | 4.268 to 49.998                                                                   |
| Index ranges                                                 | −14 ≤ <i>h</i> ≤ 14, −21 ≤ <i>k</i> ≤ 21, −27 ≤ <i>l</i> ≤ 27                     |
| Reflections collected                                        | 96672                                                                             |
| Independent reflections                                      | 8987 [ <i>R</i> <sub>int</sub> = 0.0946, <i>R</i> <sub>sigma</sub> = 0.0427]      |
| Data/restraints/parameters                                   | 8987/1293/603                                                                     |
| Goodness-of-fit on <i>F</i> <sup>2</sup>                     | 1.077                                                                             |
| Final <i>R</i> indexes [ <i>I</i> ≥ 2 $\sigma$ ( <i>I</i> )] | <i>R</i> <sub>1</sub> = 0.1301, <i>wR</i> <sub>2</sub> = 0.2536                   |
| Final <i>R</i> indexes [all data]                            | <i>R</i> <sub>1</sub> = 0.1530, <i>wR</i> <sub>2</sub> = 0.2636                   |
| Largest diff. peak/hole/e Å <sup>−3</sup>                    | 1.75/−1.94                                                                        |

**Table S 8.** Crystal data and structure refinement for **1-4, 10**.

| Identification code                                          | K(18c6)Cr5                                                                       | K(18c6)Mn6                                                                       | K(18c6)Fe7                                                                       | K(18c6)Co8                                                                       | K(18c6)Zn10                                                                       |
|--------------------------------------------------------------|----------------------------------------------------------------------------------|----------------------------------------------------------------------------------|----------------------------------------------------------------------------------|----------------------------------------------------------------------------------|-----------------------------------------------------------------------------------|
| Empirical formula                                            | C <sub>42</sub> H <sub>84</sub> CrKN <sub>4</sub> O <sub>8</sub> Si <sub>4</sub> | C <sub>34</sub> H <sub>68</sub> KMnN <sub>4</sub> O <sub>6</sub> Si <sub>4</sub> | C <sub>42</sub> H <sub>83</sub> FeKN <sub>4</sub> O <sub>8</sub> Si <sub>4</sub> | C <sub>42</sub> H <sub>84</sub> CoKN <sub>4</sub> O <sub>8</sub> Si <sub>4</sub> | C <sub>38</sub> H <sub>78</sub> KN <sub>4</sub> O <sub>7</sub> Si <sub>4</sub> Zn |
| Formula weight                                               | 976.59                                                                           | 835.32                                                                           | 978.61                                                                           | 983.52                                                                           | 919.87                                                                            |
| Temperature / K                                              | 100.0                                                                            | 100.0                                                                            | 100.0                                                                            | 100.0                                                                            | 100.0                                                                             |
| Crystal system                                               | triclinic                                                                        | monoclinic                                                                       | triclinic                                                                        | triclinic                                                                        | monoclinic                                                                        |
| Space group                                                  | P-1                                                                              | C2                                                                               | P-1                                                                              | P-1                                                                              | P2 <sub>1</sub> /c                                                                |
| <i>a</i> /Å                                                  | 11.6269(2)                                                                       | 34.8403(17)                                                                      | 10.8613(5)                                                                       | 10.8097(5)                                                                       | 12.1899(7)                                                                        |
| <i>b</i> /Å                                                  | 21.5546(4)                                                                       | 18.4715(11)                                                                      | 13.2627(6)                                                                       | 13.2648(6)                                                                       | 18.4365(10)                                                                       |
| <i>c</i> /Å                                                  | 21.8560(4)                                                                       | 14.5302(8)                                                                       | 19.8669(9)                                                                       | 19.9051(10)                                                                      | 22.8273(13)                                                                       |
| $\alpha$ /°                                                  | 95.633(2)                                                                        | 90                                                                               | 77.5970(10)                                                                      | 77.712(2)                                                                        | 90                                                                                |
| $\beta$ /°                                                   | 89.8920(10)                                                                      | 96.555(4)                                                                        | 80.062(2)                                                                        | 80.199(2)                                                                        | 95.423(2)                                                                         |
| $\gamma$ /°                                                  | 90.377(2)                                                                        | 90                                                                               | 83.452(2)                                                                        | 83.606(2)                                                                        | 90                                                                                |
| Volume/Å <sup>3</sup>                                        | 5450.83(17)                                                                      | 9289.8(9)                                                                        | 2744.3(2)                                                                        | 2739.7(2)                                                                        | 5107.2(5)                                                                         |
| <i>Z</i>                                                     | 4                                                                                | 8                                                                                | 2                                                                                | 2                                                                                | 4                                                                                 |
| $\rho_{\text{calc}}$ g/cm <sup>3</sup>                       | 1.190                                                                            | 1.194                                                                            | 1.184                                                                            | 1.192                                                                            | 1.196                                                                             |
| $\mu$ /mm <sup>-1</sup>                                      | 0.422                                                                            | 0.518                                                                            | 0.485                                                                            | 0.524                                                                            | 0.700                                                                             |
| <i>F</i> (000)                                               | 2108.0                                                                           | 3584.0                                                                           | 1055.0                                                                           | 1060.0                                                                           | 1980.0                                                                            |
| Crystal size/mm <sup>3</sup>                                 | 0.3494 × 0.2903 × 0.2027                                                         | 0.27 × 0.18 × 0.07                                                               | 0.21 × 0.2 × 0.11                                                                | 0.23 × 0.14 × 0.07                                                               | 0.492 × 0.383 × 0.15                                                              |
| Radiation                                                    | Mo K $\alpha$ ( $\lambda$ = 0.71073)                                              |
| 2 $\theta$ range for data collection/°                       | 3.504 to 50                                                                      | 3.668 to 54.998                                                                  | 4.646 to 55.124                                                                  | 4.238 to 55.058                                                                  | 4.268 to 49.998                                                                   |
| Index ranges                                                 | −13 ≤ <i>h</i> ≤ 13, −25 ≤ <i>k</i> ≤ 25, −25 ≤ <i>l</i> ≤ 25                    | −45 ≤ <i>h</i> ≤ 43, −24 ≤ <i>k</i> ≤ 24, −18 ≤ <i>l</i> ≤ 18                    | −14 ≤ <i>h</i> ≤ 14, −17 ≤ <i>k</i> ≤ 17, −25 ≤ <i>l</i> ≤ 25                    | −14 ≤ <i>h</i> ≤ 14, −16 ≤ <i>k</i> ≤ 17, −25 ≤ <i>l</i> ≤ 25                    | −14 ≤ <i>h</i> ≤ 14, −21 ≤ <i>k</i> ≤ 21, −27 ≤ <i>l</i> ≤ 27                     |
| Reflections collected                                        | 88325                                                                            | 52126                                                                            | 103782                                                                           | 89930                                                                            | 96672                                                                             |
| Independent reflections                                      | 19148 [ <i>R</i> <sub>int</sub> = 0.0630, <i>R</i> <sub>sigma</sub> = 0.0368]    | 21354 [ <i>R</i> <sub>int</sub> = 0.0285, <i>R</i> <sub>sigma</sub> = 0.0488]    | 12642 [ <i>R</i> <sub>int</sub> = 0.0332, <i>R</i> <sub>sigma</sub> = 0.0201]    | 12549 [ <i>R</i> <sub>int</sub> = 0.0853, <i>R</i> <sub>sigma</sub> = 0.0565]    | 8987 [ <i>R</i> <sub>int</sub> = 0.0946, <i>R</i> <sub>sigma</sub> = 0.0427]      |
| Data/restraints/parameters                                   | 19148/0/1112                                                                     | 21354/1546/1264                                                                  | 12642/276/683                                                                    | 12549/57/584                                                                     | 8987/1293/603                                                                     |
| Goodness-of-fit on <i>F</i> <sup>2</sup>                     | 1.073                                                                            | 0.917                                                                            | 1.054                                                                            | 1.017                                                                            | 1.077                                                                             |
| Final <i>R</i> indexes [ <i>I</i> ≥ 2 $\sigma$ ( <i>I</i> )] | <i>R</i> <sub>1</sub> = 0.0512, <i>wR</i> <sub>2</sub> = 0.1293                  | <i>R</i> <sub>1</sub> = 0.0376, <i>wR</i> <sub>2</sub> = 0.0780                  | <i>R</i> <sub>1</sub> = 0.0279, <i>wR</i> <sub>2</sub> = 0.0618                  | <i>R</i> <sub>1</sub> = 0.0420, <i>wR</i> <sub>2</sub> = 0.0739                  | <i>R</i> <sub>1</sub> = 0.1301, <i>wR</i> <sub>2</sub> = 0.2536                   |
| Final <i>R</i> indexes [all data]                            | <i>R</i> <sub>1</sub> = 0.0571, <i>wR</i> <sub>2</sub> = 0.1323                  | <i>R</i> <sub>1</sub> = 0.0521, <i>wR</i> <sub>2</sub> = 0.0815                  | <i>R</i> <sub>1</sub> = 0.0383, <i>wR</i> <sub>2</sub> = 0.0658                  | <i>R</i> <sub>1</sub> = 0.0780, <i>wR</i> <sub>2</sub> = 0.0831                  | <i>R</i> <sub>1</sub> = 0.1530, <i>wR</i> <sub>2</sub> = 0.2636                   |
| Largest diff. peak/hole/e Å <sup>-3</sup>                    | 0.79/−0.47                                                                       | 0.81/−0.39                                                                       | 0.34/−0.24                                                                       | 0.29/−0.49                                                                       | 1.75/−1.94                                                                        |

**Table S9.** Crystal data and structure refinement for **4** and **9**.

| Identification Code                                          | Co4                                                                            | Zn9                                                                            |
|--------------------------------------------------------------|--------------------------------------------------------------------------------|--------------------------------------------------------------------------------|
| Empirical formula                                            | C <sub>44</sub> H <sub>88</sub> Co <sub>2</sub> N <sub>8</sub> Si <sub>8</sub> | C <sub>44</sub> H <sub>88</sub> N <sub>8</sub> Si <sub>8</sub> Zn <sub>2</sub> |
| Formula weight                                               | 1071.80                                                                        | 1084.68                                                                        |
| Temperature / K                                              | 100                                                                            | 100                                                                            |
| Crystal system                                               | orthorhombic                                                                   | orthorhombic                                                                   |
| Space group                                                  | Pca2 <sub>1</sub>                                                              | Pca2 <sub>1</sub>                                                              |
| <i>a</i> /Å                                                  | 18.7674(9)                                                                     | 18.8806(12)                                                                    |
| <i>b</i> /Å                                                  | 18.1030(8)                                                                     | 18.0560(13)                                                                    |
| <i>c</i> /Å                                                  | 17.5930(7)                                                                     | 17.6133(17)                                                                    |
| $\alpha$ /°                                                  | 90                                                                             | 90                                                                             |
| $\beta$ /°                                                   | 90                                                                             | 90                                                                             |
| $\gamma$ /°                                                  | 90                                                                             | 90                                                                             |
| Volume / Å <sup>3</sup>                                      | 5977.2(5)                                                                      | 6004.5(8)                                                                      |
| <i>Z</i>                                                     | 4                                                                              | 4                                                                              |
| $\rho_{\text{calc}}$ g/cm <sup>3</sup>                       | 1.191                                                                          | 1.200                                                                          |
| $\mu$ /mm <sup>−1</sup>                                      | 0.751                                                                          | 0.994                                                                          |
| <i>F</i> (000)                                               | 2296.0                                                                         | 2320.0                                                                         |
| Crystal size / mm <sup>3</sup>                               | 0.31 × 0.2 × 0.2                                                               | 0.254 × 0.189 × 0.085                                                          |
| Radiation                                                    | Mo K $\alpha$ ( $\lambda$ = 0.71073)                                           | Mo K $\alpha$ ( $\lambda$ = 0.71073)                                           |
| 2 $\theta$ range for data collection/°                       | 3.89 to 51.998                                                                 | 4.314 to 51.996                                                                |
| Index ranges                                                 | −23 ≤ <i>h</i> ≤ 21, −19 ≤ <i>k</i> ≤ 22, −19 ≤ <i>l</i> ≤ 21                  | −23 ≤ <i>h</i> ≤ 23, −21 ≤ <i>k</i> ≤ 22, −21 ≤ <i>l</i> ≤ 21                  |
| Reflections collected                                        | 20518                                                                          | 52603                                                                          |
| Independent reflections                                      | 10939 [ <i>R</i> <sub>int</sub> = 0.0219, <i>R</i> <sub>sigma</sub> = 0.0228]  | 11789 [ <i>R</i> <sub>int</sub> = 0.0737, <i>R</i> <sub>sigma</sub> = 0.0589]  |
| Data/restraints/parameters                                   | 10939/1/588                                                                    | 11789/1/584                                                                    |
| Goodness-of-fit on <i>F</i> <sup>2</sup>                     | 1.014                                                                          | 0.969                                                                          |
| Final <i>R</i> indexes [ <i>I</i> ≥ 2 $\sigma$ ( <i>I</i> )] | <i>R</i> <sub>1</sub> = 0.0280, <i>wR</i> <sub>2</sub> = 0.0670                | <i>R</i> <sub>1</sub> = 0.0340, <i>wR</i> <sub>2</sub> = 0.0700                |
| Final <i>R</i> indexes [all data]                            | <i>R</i> <sub>1</sub> = 0.0307, <i>wR</i> <sub>2</sub> = 0.0679                | <i>R</i> <sub>1</sub> = 0.0445, <i>wR</i> <sub>2</sub> = 0.0718                |
| Largest diff. peak/hole/e Å <sup>−3</sup>                    | 0.45/−0.25                                                                     | 0.58/−0.21                                                                     |

## References

- O. V. Dolomanov, L. J. Bourhis, R. J. Gildea, J. A. K. Howard, H. Puschmann, OLEX2: A Complete Structure Solution, Re-refinement and Analysis Program. *J. Appl. Crystallogr.* **2009**, *42*, 339–441.
- G. M. Sheldrick, *Acta Cryst.* **2015**, *71*, 3–8.
- L. Farrugia, *J. Appl. Crystallogr.*, **1999**, *32*, 837–838.
- P. W. Betteridge, J. R. Carruthers, R. I. Cooper, K. Prout, D. J. Watkin *J. Appl. Cryst.* **2003**, *36*, 1487.
- International Tables for X-ray crystallography (Kynoch Press, Birmingham, England, **1974**) Vol. IV.
- Bruker AXS Inc. SADABS, 2016/2; Bruker AXS Inc.: Madison, WI, USA, 2016.
- Stoe & Cie. X-Area, X-Red 1.63.1.0, 2002; Stoe & Cie: Darmstadt, Germany, 2016.
