# Supplementary material
Source: MDPI journal article supplement (https://www.mdpi.com/2304-6740/7/10/117)
Supplement: s1 [file s1]

# checkCIF/PLATON report

You have not supplied any structure factors. As a result the full set of tests cannot be run.

THIS REPORT IS FOR GUIDANCE ONLY. IF USED AS PART OF A REVIEW PROCEDURE FOR PUBLICATION, IT SHOULD NOT REPLACE THE EXPERTISE OF AN EXPERIENCED CRYSTALLOGRAPHIC REFEREE.

No syntax errors found.      CIF dictionary      Interpreting this report

## Datablock: k18c6cr5

---

Bond precision:    C-C = 0.0072 A

Wavelength=0.71073

Cell:                a=11.6269(2)                b=21.5546(4)                c=21.8560(4)  
                      alpha=95.633(2)            beta=89.892(1)            gamma=90.377(2)  
Temperature:        100 K

|                | Calculated                         | Reported                           |
|----------------|------------------------------------|------------------------------------|
| Volume         | 5450.83(17)                        | 5450.83(17)                        |
| Space group    | P -1                               | P -1                               |
| Hall group     | -P 1                               | -P 1                               |
| Moiety formula | C22 H44 Cr N4 Si4, C20 H40<br>K O8 | C22 H44 Cr N4 Si4, C20 H40<br>K O8 |
| Sum formula    | C42 H84 Cr K N4 O8 Si4             | C42 H84 Cr K N4 O8 Si4             |
| Mr             | 976.59                             | 976.59                             |
| Dx, g cm-3     | 1.190                              | 1.190                              |
| Z              | 4                                  | 4                                  |
| Mu (mm-1)      | 0.422                              | 0.422                              |
| F000           | 2108.0                             | 2108.0                             |
| F000'          | 2112.07                            |                                    |
| h, k, lmax     | 14, 27, 27                         | 14, 27, 27                         |
| Nref           | 23810                              | 23726                              |
| Tmin, Tmax     | 0.863, 0.918                       | 0.624, 0.848                       |
| Tmin'          | 0.863                              |                                    |

Correction method= # Reported T Limits: Tmin=0.624 Tmax=0.848  
AbsCorr = NUMERICAL

Data completeness= 0.996

Theta(max)= 27.000

R(reflections)= 0.0563( 20467)

wR2(reflections)= 0.1502( 23726)

S = 1.075

Npar= 1112

---

The following ALERTS were generated. Each ALERT has the format

**test-name\_ALERT\_alert-type\_alert-level.**

Click on the hyperlinks for more details of the test.

---

 **Alert level C**

|                   |                                                |              |
|-------------------|------------------------------------------------|--------------|
| PLAT155_ALERT_4_C | The Triclinic Unitcell is NOT Reduced .....    | Please Do !  |
| PLAT241_ALERT_2_C | High 'MainMol' Ueq as Compared to Neighbors of | 001V Check   |
| PLAT241_ALERT_2_C | High 'MainMol' Ueq as Compared to Neighbors of | 0013 Check   |
| PLAT241_ALERT_2_C | High 'MainMol' Ueq as Compared to Neighbors of | C03B Check   |
| PLAT241_ALERT_2_C | High 'MainMol' Ueq as Compared to Neighbors of | 0017 Check   |
| PLAT241_ALERT_2_C | High 'MainMol' Ueq as Compared to Neighbors of | C03A Check   |
| PLAT242_ALERT_2_C | Low 'MainMol' Ueq as Compared to Neighbors of  | Si2A Check   |
| PLAT242_ALERT_2_C | Low 'MainMol' Ueq as Compared to Neighbors of  | Si2B Check   |
| PLAT242_ALERT_2_C | Low 'MainMol' Ueq as Compared to Neighbors of  | K003 Check   |
| PLAT242_ALERT_2_C | Low 'MainMol' Ueq as Compared to Neighbors of  | K005 Check   |
| PLAT242_ALERT_2_C | Low 'MainMol' Ueq as Compared to Neighbors of  | C02T Check   |
| PLAT242_ALERT_2_C | Low 'MainMol' Ueq as Compared to Neighbors of  | K006 Check   |
| PLAT242_ALERT_2_C | Low 'MainMol' Ueq as Compared to Neighbors of  | C01M Check   |
| PLAT242_ALERT_2_C | Low 'MainMol' Ueq as Compared to Neighbors of  | C03C Check   |
| PLAT341_ALERT_3_C | Low Bond Precision on C-C Bonds .....          | 0.00721 Ang. |
| PLAT360_ALERT_2_C | Short C(sp3)-C(sp3) Bond C03A - C03C .         | 1.43 Ang.    |

---

 **Alert level G**

|                   |                                                  |             |
|-------------------|--------------------------------------------------|-------------|
| PLAT083_ALERT_2_G | SHELXL Second Parameter in WGHT Unusually Large  | 12.47 Why ? |
| PLAT720_ALERT_4_G | Number of Unusual/Non-Standard Labels .....      | 139 Note    |
| PLAT790_ALERT_4_G | Centre of Gravity not Within Unit Cell: Resd. #  | 2 Note      |
|                   | C22 H44 Cr N4 Si4                                |             |
| PLAT794_ALERT_5_G | Tentative Bond Valency for Cr1A (II) .           | 1.93 Info   |
| PLAT794_ALERT_5_G | Tentative Bond Valency for Cr1B (II) .           | 1.92 Info   |
| PLAT870_ALERT_4_G | ALERTS Related to Twinning Effects Suppressed .. | ! Info      |

- 
- 0 **ALERT level A** = Most likely a serious problem - resolve or explain  
0 **ALERT level B** = A potentially serious problem, consider carefully  
16 **ALERT level C** = Check. Ensure it is not caused by an omission or oversight  
6 **ALERT level G** = General information/check it is not something unexpected

- 0 ALERT type 1 CIF construction/syntax error, inconsistent or missing data  
15 ALERT type 2 Indicator that the structure model may be wrong or deficient  
1 ALERT type 3 Indicator that the structure quality may be low  
4 ALERT type 4 Improvement, methodology, query or suggestion  
2 ALERT type 5 Informative message, check
- 
-

It is advisable to attempt to resolve as many as possible of the alerts in all categories. Often the minor alerts point to easily fixed oversights, errors and omissions in your CIF or refinement strategy, so attention to these fine details can be worthwhile. In order to resolve some of the more serious problems it may be necessary to carry out additional measurements or structure refinements. However, the purpose of your study may justify the reported deviations and the more serious of these should normally be commented upon in the discussion or experimental section of a paper or in the "special\_details" fields of the CIF. checkCIF was carefully designed to identify outliers and unusual parameters, but every test has its limitations and alerts that are not important in a particular case may appear. Conversely, the absence of alerts does not guarantee there are no aspects of the results needing attention. It is up to the individual to critically assess their own results and, if necessary, seek expert advice.

### **Publication of your CIF in IUCr journals**

A basic structural check has been run on your CIF. These basic checks will be run on all CIFs submitted for publication in IUCr journals (*Acta Crystallographica*, *Journal of Applied Crystallography*, *Journal of Synchrotron Radiation*); however, if you intend to submit to *Acta Crystallographica Section C* or *E* or *IUCrData*, you should make sure that full publication checks are run on the final version of your CIF prior to submission.

### **Publication of your CIF in other journals**

Please refer to the *Notes for Authors* of the relevant journal for any special instructions relating to CIF submission.



# checkCIF/PLATON report

You have not supplied any structure factors. As a result the full set of tests cannot be run.

THIS REPORT IS FOR GUIDANCE ONLY. IF USED AS PART OF A REVIEW PROCEDURE FOR PUBLICATION, IT SHOULD NOT REPLACE THE EXPERTISE OF AN EXPERIENCED CRYSTALLOGRAPHIC REFEREE.

No syntax errors found.      CIF dictionary      Interpreting this report

## Datablock: k18c6mn6

---

|                        |                                 |                                                         |
|------------------------|---------------------------------|---------------------------------------------------------|
| Bond precision:        | C-C = 0.0085 A                  | Wavelength=0.71073                                      |
| Cell:                  | a=34.8403 (17)                  | b=18.4715 (11)      c=14.5302 (8)                       |
|                        | alpha=90                        | beta=96.555 (4)      gamma=90                           |
| Temperature:           | 150 K                           |                                                         |
|                        | Calculated                      | Reported                                                |
| Volume                 | 9289.8 (9)                      | 9289.8 (9)                                              |
| Space group            | C 2                             | C 1 2 1                                                 |
| Hall group             | C 2y                            | C 2y                                                    |
| Moiety formula         | C12 H24 K O6, C22 H44 Mn N4 Si4 | 0.25(C124 H248 K3 Mn4 N16 O18 Si16), 0.25(C12 H24 K O6) |
| Sum formula            | C34 H68 K Mn N4 O6 Si4          | C34 H68 K Mn N4 O6 Si4                                  |
| Mr                     | 835.32                          | 835.32                                                  |
| Dx, g cm <sup>-3</sup> | 1.194                           | 1.194                                                   |
| Z                      | 8                               | 8                                                       |
| Mu (mm <sup>-1</sup> ) | 0.518                           | 0.518                                                   |
| F000                   | 3584.0                          | 3584.0                                                  |
| F000'                  | 3591.94                         |                                                         |
| h, k, lmax             | 45, 24, 18                      | 45, 24, 18                                              |
| Nref                   | 21359 [ 11012]                  | 21354                                                   |
| Tmin, Tmax             | 0.894, 0.964                    | 0.789, 0.976                                            |
| Tmin'                  | 0.869                           |                                                         |

Correction method= # Reported T Limits: Tmin=0.789 Tmax=0.976  
AbsCorr = NUMERICAL

Data completeness= 1.94/1.00      Theta (max)= 27.499

R(reflections)= 0.0368 ( 16849)      wR2(reflections)= 0.0786 ( 21354)

S = 0.911      Npar= 1270

---

The following ALERTS were generated. Each ALERT has the format

**test-name\_ALERT\_alert-type\_alert-level.**

Click on the hyperlinks for more details of the test.



### Alert level C

|                   |                                                  |         |        |
|-------------------|--------------------------------------------------|---------|--------|
| PLAT094_ALERT_2_C | Ratio of Maximum / Minimum Residual Density .... | 3.90    | Report |
| PLAT215_ALERT_3_C | Disordered C19# has ADP max/min Ratio .....      | 3.5     | Note   |
| PLAT215_ALERT_3_C | Disordered C20# has ADP max/min Ratio .....      | 3.8     | Note   |
| PLAT220_ALERT_2_C | Non-Solvent Resd 4 C Ueq(max)/Ueq(min) Range     | 3.3     | Ratio  |
| PLAT230_ALERT_2_C | Hirshfeld Test Diff for O00N --C01W .            | 5.5     | s.u.   |
| PLAT234_ALERT_4_C | Large Hirshfeld Difference Si2B --C2 .           | 0.18    | Ang.   |
| PLAT241_ALERT_2_C | High 'MainMol' Ueq as Compared to Neighbors of   | C3B     | Check  |
| PLAT241_ALERT_2_C | High 'MainMol' Ueq as Compared to Neighbors of   | C8B     | Check  |
| PLAT241_ALERT_2_C | High 'MainMol' Ueq as Compared to Neighbors of   | C022    | Check  |
| PLAT242_ALERT_2_C | Low 'MainMol' Ueq as Compared to Neighbors of    | K005    | Check  |
| PLAT242_ALERT_2_C | Low 'MainMol' Ueq as Compared to Neighbors of    | Si1B    | Check  |
| PLAT242_ALERT_2_C | Low 'MainMol' Ueq as Compared to Neighbors of    | Si2B    | Check  |
| PLAT242_ALERT_2_C | Low 'MainMol' Ueq as Compared to Neighbors of    | Si3B    | Check  |
| PLAT242_ALERT_2_C | Low 'MainMol' Ueq as Compared to Neighbors of    | Si1A    | Check  |
| PLAT242_ALERT_2_C | Low 'MainMol' Ueq as Compared to Neighbors of    | Si3A    | Check  |
| PLAT242_ALERT_2_C | Low 'MainMol' Ueq as Compared to Neighbors of    | Si4A    | Check  |
| PLAT341_ALERT_3_C | Low Bond Precision on C-C Bonds .....            | 0.00854 | Ang.   |



### Alert level G

|                   |                                                  |        |        |
|-------------------|--------------------------------------------------|--------|--------|
| PLAT002_ALERT_2_G | Number of Distance or Angle Restraints on AtSite | 54     | Note   |
| PLAT003_ALERT_2_G | Number of Uiso or Uij Restrained non-H Atoms ... | 54     | Report |
| PLAT033_ALERT_4_G | Flack x Value Deviates > 3.0 * sigma from Zero . | 0.086  | Note   |
| PLAT042_ALERT_1_G | Calc. and Reported MoietyFormula Strings Differ  | Please | Check  |
| PLAT171_ALERT_4_G | The CIF-Embedded .res File Contains EADP Records | 2      | Report |
| PLAT172_ALERT_4_G | The CIF-Embedded .res File Contains DFIX Records | 1      | Report |
| PLAT176_ALERT_4_G | The CIF-Embedded .res File Contains SADI Records | 2      | Report |
| PLAT178_ALERT_4_G | The CIF-Embedded .res File Contains SIMU Records | 1      | Report |
| PLAT186_ALERT_4_G | The CIF-Embedded .res File Contains ISOR Records | 1      | Report |
| PLAT187_ALERT_4_G | The CIF-Embedded .res File Contains RIGU Records | 1      | Report |
| PLAT300_ALERT_4_G | Atom Site Occupancy of O1_1 Constrained at       | 0.5    | Check  |
| PLAT300_ALERT_4_G | Atom Site Occupancy of O2_1 Constrained at       | 0.5    | Check  |
| PLAT300_ALERT_4_G | Atom Site Occupancy of O3_1 Constrained at       | 0.5    | Check  |
| PLAT300_ALERT_4_G | Atom Site Occupancy of O4_1 Constrained at       | 0.5    | Check  |
| PLAT300_ALERT_4_G | Atom Site Occupancy of O5_1 Constrained at       | 0.5    | Check  |
| PLAT300_ALERT_4_G | Atom Site Occupancy of O6_1 Constrained at       | 0.5    | Check  |
| PLAT300_ALERT_4_G | Atom Site Occupancy of C1_1 Constrained at       | 0.5    | Check  |
| PLAT300_ALERT_4_G | Atom Site Occupancy of C2_1 Constrained at       | 0.5    | Check  |
| PLAT300_ALERT_4_G | Atom Site Occupancy of C3_1 Constrained at       | 0.5    | Check  |
| PLAT300_ALERT_4_G | Atom Site Occupancy of C4_1 Constrained at       | 0.5    | Check  |
| PLAT300_ALERT_4_G | Atom Site Occupancy of C5_1 Constrained at       | 0.5    | Check  |
| PLAT300_ALERT_4_G | Atom Site Occupancy of C6_1 Constrained at       | 0.5    | Check  |
| PLAT300_ALERT_4_G | Atom Site Occupancy of C7_1 Constrained at       | 0.5    | Check  |
| PLAT300_ALERT_4_G | Atom Site Occupancy of C8_1 Constrained at       | 0.5    | Check  |
| PLAT300_ALERT_4_G | Atom Site Occupancy of C9_1 Constrained at       | 0.5    | Check  |
| PLAT300_ALERT_4_G | Atom Site Occupancy of C10_1 Constrained at      | 0.5    | Check  |
| PLAT300_ALERT_4_G | Atom Site Occupancy of C11_1 Constrained at      | 0.5    | Check  |
| PLAT300_ALERT_4_G | Atom Site Occupancy of C12_1 Constrained at      | 0.5    | Check  |
| PLAT300_ALERT_4_G | Atom Site Occupancy of H1A_1 Constrained at      | 0.5    | Check  |
| PLAT300_ALERT_4_G | Atom Site Occupancy of H1B_1 Constrained at      | 0.5    | Check  |
| PLAT300_ALERT_4_G | Atom Site Occupancy of H2A_1 Constrained at      | 0.5    | Check  |
| PLAT300_ALERT_4_G | Atom Site Occupancy of H2B_1 Constrained at      | 0.5    | Check  |
| PLAT300_ALERT_4_G | Atom Site Occupancy of H3A_1 Constrained at      | 0.5    | Check  |
| PLAT300_ALERT_4_G | Atom Site Occupancy of H3B_1 Constrained at      | 0.5    | Check  |
| PLAT300_ALERT_4_G | Atom Site Occupancy of H4A_1 Constrained at      | 0.5    | Check  |

|                   |                                                  |                |       |        |
|-------------------|--------------------------------------------------|----------------|-------|--------|
| PLAT300_ALERT_4_G | Atom Site Occupancy of H4B_1                     | Constrained at | 0.5   | Check  |
| PLAT300_ALERT_4_G | Atom Site Occupancy of H5A_1                     | Constrained at | 0.5   | Check  |
| PLAT300_ALERT_4_G | Atom Site Occupancy of H5B_1                     | Constrained at | 0.5   | Check  |
| PLAT300_ALERT_4_G | Atom Site Occupancy of H6A_1                     | Constrained at | 0.5   | Check  |
| PLAT300_ALERT_4_G | Atom Site Occupancy of H6B_1                     | Constrained at | 0.5   | Check  |
| PLAT300_ALERT_4_G | Atom Site Occupancy of H7A_1                     | Constrained at | 0.5   | Check  |
| PLAT300_ALERT_4_G | Atom Site Occupancy of H7B_1                     | Constrained at | 0.5   | Check  |
| PLAT300_ALERT_4_G | Atom Site Occupancy of H8A_1                     | Constrained at | 0.5   | Check  |
| PLAT300_ALERT_4_G | Atom Site Occupancy of H8B_1                     | Constrained at | 0.5   | Check  |
| PLAT300_ALERT_4_G | Atom Site Occupancy of H9A_1                     | Constrained at | 0.5   | Check  |
| PLAT300_ALERT_4_G | Atom Site Occupancy of H9B_1                     | Constrained at | 0.5   | Check  |
| PLAT300_ALERT_4_G | Atom Site Occupancy of H10A_1                    | Constrained at | 0.5   | Check  |
| PLAT300_ALERT_4_G | Atom Site Occupancy of H10B_1                    | Constrained at | 0.5   | Check  |
| PLAT300_ALERT_4_G | Atom Site Occupancy of H11A_1                    | Constrained at | 0.5   | Check  |
| PLAT300_ALERT_4_G | Atom Site Occupancy of H11B_1                    | Constrained at | 0.5   | Check  |
| PLAT300_ALERT_4_G | Atom Site Occupancy of H12A_1                    | Constrained at | 0.5   | Check  |
| PLAT300_ALERT_4_G | Atom Site Occupancy of H12B_1                    | Constrained at | 0.5   | Check  |
| PLAT300_ALERT_4_G | Atom Site Occupancy of C21B                      | Constrained at | 0.8   | Check  |
| PLAT300_ALERT_4_G | Atom Site Occupancy of C22B                      | Constrained at | 0.8   | Check  |
| PLAT300_ALERT_4_G | Atom Site Occupancy of C23B                      | Constrained at | 0.8   | Check  |
| PLAT300_ALERT_4_G | Atom Site Occupancy of C2                        | Constrained at | 0.2   | Check  |
| PLAT300_ALERT_4_G | Atom Site Occupancy of C3                        | Constrained at | 0.2   | Check  |
| PLAT300_ALERT_4_G | Atom Site Occupancy of C9                        | Constrained at | 0.2   | Check  |
| PLAT300_ALERT_4_G | Atom Site Occupancy of H21A                      | Constrained at | 0.8   | Check  |
| PLAT300_ALERT_4_G | Atom Site Occupancy of H21B                      | Constrained at | 0.8   | Check  |
| PLAT300_ALERT_4_G | Atom Site Occupancy of H21C                      | Constrained at | 0.8   | Check  |
| PLAT300_ALERT_4_G | Atom Site Occupancy of H22A                      | Constrained at | 0.8   | Check  |
| PLAT300_ALERT_4_G | Atom Site Occupancy of H22B                      | Constrained at | 0.8   | Check  |
| PLAT300_ALERT_4_G | Atom Site Occupancy of H22C                      | Constrained at | 0.8   | Check  |
| PLAT300_ALERT_4_G | Atom Site Occupancy of H23A                      | Constrained at | 0.8   | Check  |
| PLAT300_ALERT_4_G | Atom Site Occupancy of H23B                      | Constrained at | 0.8   | Check  |
| PLAT300_ALERT_4_G | Atom Site Occupancy of H23C                      | Constrained at | 0.8   | Check  |
| PLAT300_ALERT_4_G | Atom Site Occupancy of H2A                       | Constrained at | 0.2   | Check  |
| PLAT300_ALERT_4_G | Atom Site Occupancy of H2C                       | Constrained at | 0.2   | Check  |
| PLAT300_ALERT_4_G | Atom Site Occupancy of H2D                       | Constrained at | 0.2   | Check  |
| PLAT300_ALERT_4_G | Atom Site Occupancy of H3A                       | Constrained at | 0.2   | Check  |
| PLAT300_ALERT_4_G | Atom Site Occupancy of H3C                       | Constrained at | 0.2   | Check  |
| PLAT300_ALERT_4_G | Atom Site Occupancy of H3D                       | Constrained at | 0.2   | Check  |
| PLAT300_ALERT_4_G | Atom Site Occupancy of H9A                       | Constrained at | 0.2   | Check  |
| PLAT300_ALERT_4_G | Atom Site Occupancy of H9C                       | Constrained at | 0.2   | Check  |
| PLAT300_ALERT_4_G | Atom Site Occupancy of H9D                       | Constrained at | 0.2   | Check  |
| PLAT301_ALERT_3_G | Main Residue Disorder .....(Resd 1 )             |                | 95%   | Note   |
| PLAT301_ALERT_3_G | Main Residue Disorder .....(Resd 2 )             |                | 95%   | Note   |
| PLAT301_ALERT_3_G | Main Residue Disorder .....(Resd 3 )             |                | 10%   | Note   |
| PLAT412_ALERT_2_G | Short Intra XH3 .. XHn H19B ..H9D .              |                | 1.90  | Ang.   |
|                   | x,y,z =                                          | 1_555          |       | Check  |
| PLAT720_ALERT_4_G | Number of Unusual/Non-Standard Labels .....      |                | 179   | Note   |
| PLAT779_ALERT_4_G | Suspect or Irrelevant (Bond) Angle(s) in CIF . # |                | 246   | Check  |
|                   | O3_1 -C5_1 -K005 1.555 1.555 1.555               |                | 44.40 | Deg.   |
| PLAT789_ALERT_4_G | Atoms with Negative _atom_site_disorder_group #  |                | 126   | Check  |
| PLAT794_ALERT_5_G | Tentative Bond Valency for Mn0A (II) .           |                | 1.98  | Info   |
| PLAT811_ALERT_5_G | No ADDSYM Analysis: Too Many Excluded Atoms .... |                |       | ! Info |
| PLAT860_ALERT_3_G | Number of Least-Squares Restraints .....         |                | 1546  | Note   |
| PLAT870_ALERT_4_G | ALERTS Related to Twinning Effects Suppressed .. |                |       | ! Info |

---

0 **ALERT level A** = Most likely a serious problem - resolve or explain  
 0 **ALERT level B** = A potentially serious problem, consider carefully  
 17 **ALERT level C** = Check. Ensure it is not caused by an omission or oversight  
 87 **ALERT level G** = General information/check it is not something unexpected

1 ALERT type 1 CIF construction/syntax error, inconsistent or missing data

16 ALERT type 2 Indicator that the structure model may be wrong or deficient  
7 ALERT type 3 Indicator that the structure quality may be low  
78 ALERT type 4 Improvement, methodology, query or suggestion  
2 ALERT type 5 Informative message, check

---

It is advisable to attempt to resolve as many as possible of the alerts in all categories. Often the minor alerts point to easily fixed oversights, errors and omissions in your CIF or refinement strategy, so attention to these fine details can be worthwhile. In order to resolve some of the more serious problems it may be necessary to carry out additional measurements or structure refinements. However, the purpose of your study may justify the reported deviations and the more serious of these should normally be commented upon in the discussion or experimental section of a paper or in the "special\_details" fields of the CIF. checkCIF was carefully designed to identify outliers and unusual parameters, but every test has its limitations and alerts that are not important in a particular case may appear. Conversely, the absence of alerts does not guarantee there are no aspects of the results needing attention. It is up to the individual to critically assess their own results and, if necessary, seek expert advice.

### **Publication of your CIF in IUCr journals**

A basic structural check has been run on your CIF. These basic checks will be run on all CIFs submitted for publication in IUCr journals (*Acta Crystallographica*, *Journal of Applied Crystallography*, *Journal of Synchrotron Radiation*); however, if you intend to submit to *Acta Crystallographica Section C* or *E* or *IUCrData*, you should make sure that full publication checks are run on the final version of your CIF prior to submission.

### **Publication of your CIF in other journals**

Please refer to the *Notes for Authors* of the relevant journal for any special instructions relating to CIF submission.

---



# checkCIF/PLATON report

You have not supplied any structure factors. As a result the full set of tests cannot be run.

THIS REPORT IS FOR GUIDANCE ONLY. IF USED AS PART OF A REVIEW PROCEDURE FOR PUBLICATION, IT SHOULD NOT REPLACE THE EXPERTISE OF AN EXPERIENCED CRYSTALLOGRAPHIC REFEREE.

No syntax errors found.      CIF dictionary      Interpreting this report

## Datablock: k18c6fe7

---

Bond precision:    C-C = 0.0020 A

Wavelength=0.71073

Cell:                a=10.8613(5)                b=13.2627(6)                c=19.8669(9)  
                      alpha=77.597(1)        beta=80.062(2)        gamma=83.452(2)  
Temperature:        100 K

|                | Calculated                      | Reported                              |
|----------------|---------------------------------|---------------------------------------|
| Volume         | 2744.3(2)                       | 2744.3(2)                             |
| Space group    | P -1                            | P -1                                  |
| Hall group     | -P 1                            | -P 1                                  |
| Moiety formula | C20 H40 K O8, C22 H44 Fe N4 Si4 | C22 H44 Fe N4 Si4, 2(C10 H20 K0.5 O4) |
| Sum formula    | C42 H84 Fe K N4 O8 Si4          | C42 H84 Fe K N4 O8 Si4                |
| Mr             | 980.44                          | 980.44                                |
| Dx, g cm-3     | 1.186                           | 1.187                                 |
| Z              | 2                               | 2                                     |
| Mu (mm-1)      | 0.485                           | 0.485                                 |
| F000           | 1058.0                          | 1058.0                                |
| F000'          | 1060.08                         |                                       |
| h, k, lmax     | 14, 17, 25                      | 14, 17, 25                            |
| Nref           | 12672                           | 12642                                 |
| Tmin, Tmax     | 0.903, 0.948                    | 0.900, 0.950                          |
| Tmin'          | 0.903                           |                                       |

Correction method= # Reported T Limits: Tmin=0.900 Tmax=0.950  
AbsCorr = MULTISCAN

Data completeness= 0.998

Theta(max)= 27.562

R(reflections)= 0.0280( 10773)

wR2(reflections)= 0.0675( 12642)

S = 1.060

Npar= 648

---

The following ALERTS were generated. Each ALERT has the format

**test-name\_ALERT\_alert-type\_alert-level.**

Click on the hyperlinks for more details of the test.



### Alert level C

|                   |                         |                             |     |        |
|-------------------|-------------------------|-----------------------------|-----|--------|
| PLAT213_ALERT_2_C | Atom C3S                | has ADP max/min Ratio ..... | 3.4 | oblate |
| PLAT230_ALERT_2_C | Hirshfeld Test Diff for | Si3 --C31 .                 | 5.4 | s.u.   |
| PLAT230_ALERT_2_C | Hirshfeld Test Diff for | Si3 --C33 .                 | 5.9 | s.u.   |



### Alert level G

|                   |                                                  |                   |             |
|-------------------|--------------------------------------------------|-------------------|-------------|
| PLAT002_ALERT_2_G | Number of Distance or Angle Restraints on AtSite | 20                | Note        |
| PLAT003_ALERT_2_G | Number of Uiso or Uij Restrained non-H Atoms ... | 20                | Report      |
| PLAT042_ALERT_1_G | Calc. and Reported MoietyFormula Strings Differ  | Please            | Check       |
| PLAT066_ALERT_1_G | Predicted and Reported Tmin&Tmax Range Identical | ?                 | Check       |
| PLAT175_ALERT_4_G | The CIF-Embedded .res File Contains SAME Records | 2                 | Report      |
| PLAT178_ALERT_4_G | The CIF-Embedded .res File Contains SIMU Records | 2                 | Report      |
| PLAT186_ALERT_4_G | The CIF-Embedded .res File Contains ISOR Records | 2                 | Report      |
| PLAT187_ALERT_4_G | The CIF-Embedded .res File Contains RIGU Records | 2                 | Report      |
| PLAT230_ALERT_2_G | Hirshfeld Test Diff for                          | C2SA --C3SA .     | 7.0 s.u.    |
| PLAT232_ALERT_2_G | Hirshfeld Test Diff (M-X)                        | Fe1 --N2 .        | 6.6 s.u.    |
| PLAT301_ALERT_3_G | Main Residue Disorder .....                      | (Resd 1 )         | 34% Note    |
| PLAT302_ALERT_4_G | Anion/Solvent/Minor-Residue Disorder (Resd 2 )   |                   | 34% Note    |
| PLAT720_ALERT_4_G | Number of Unusual/Non-Standard Labels .....      | 71                | Note        |
| PLAT779_ALERT_4_G | Suspect or Irrelevant (Bond) Angle(s) in CIF . # | 339               | Check       |
|                   | O1S -C2S -K2                                     | 1.555 1.555 1.555 | 44.20 Deg.  |
| PLAT794_ALERT_5_G | Tentative Bond Valency for Fe1 (II)              | .                 | 1.90 Info   |
| PLAT860_ALERT_3_G | Number of Least-Squares Restraints .....         | 560               | Note        |
| PLAT883_ALERT_1_G | No Info/Value for _atom_sites_solution_primary . |                   | Please Do ! |
| PLAT933_ALERT_2_G | Number of OMIT Records in Embedded .res File ... | 2                 | Note        |

0 **ALERT level A** = Most likely a serious problem - resolve or explain  
 0 **ALERT level B** = A potentially serious problem, consider carefully  
 3 **ALERT level C** = Check. Ensure it is not caused by an omission or oversight  
 18 **ALERT level G** = General information/check it is not something unexpected

3 ALERT type 1 CIF construction/syntax error, inconsistent or missing data  
 8 ALERT type 2 Indicator that the structure model may be wrong or deficient  
 2 ALERT type 3 Indicator that the structure quality may be low  
 7 ALERT type 4 Improvement, methodology, query or suggestion  
 1 ALERT type 5 Informative message, check

It is advisable to attempt to resolve as many as possible of the alerts in all categories. Often the minor alerts point to easily fixed oversights, errors and omissions in your CIF or refinement strategy, so attention to these fine details can be worthwhile. In order to resolve some of the more serious problems it may be necessary to carry out additional measurements or structure refinements. However, the purpose of your study may justify the reported deviations and the more serious of these should normally be commented upon in the discussion or experimental section of a paper or in the "special\_details" fields of the CIF. checkCIF was carefully designed to identify outliers and unusual parameters, but every test has its limitations and alerts that are not important in a particular case may appear. Conversely, the absence of alerts does not guarantee there are no aspects of the results needing attention. It is up to the individual to critically assess their own results and, if necessary, seek expert advice.

### **Publication of your CIF in IUCr journals**

A basic structural check has been run on your CIF. These basic checks will be run on all CIFs submitted for publication in IUCr journals (*Acta Crystallographica*, *Journal of Applied Crystallography*, *Journal of Synchrotron Radiation*); however, if you intend to submit to *Acta Crystallographica Section C* or *E* or *IUCrData*, you should make sure that full publication checks are run on the final version of your CIF prior to submission.

### **Publication of your CIF in other journals**

Please refer to the *Notes for Authors* of the relevant journal for any special instructions relating to CIF submission.



# checkCIF/PLATON report

You have not supplied any structure factors. As a result the full set of tests cannot be run.

THIS REPORT IS FOR GUIDANCE ONLY. IF USED AS PART OF A REVIEW PROCEDURE FOR PUBLICATION, IT SHOULD NOT REPLACE THE EXPERTISE OF AN EXPERIENCED CRYSTALLOGRAPHIC REFEREE.

No syntax errors found.      CIF dictionary      Interpreting this report

## Datablock: k18c6co8

---

Bond precision:    C-C = 0.0034 Å

Wavelength=0.71073

Cell:                a=10.8097(5)                b=13.2648(6)                c=19.9051(10)  
                      alpha=77.712(2)        beta=80.199(2)        gamma=83.606(2)  
Temperature:        100 K

|                        | Calculated                      | Reported                              |
|------------------------|---------------------------------|---------------------------------------|
| Volume                 | 2739.7(2)                       | 2739.7(2)                             |
| Space group            | P -1                            | P -1                                  |
| Hall group             | -P 1                            | -P 1                                  |
| Moiety formula         | C20 H40 K O8, C22 H44 Co N4 Si4 | C22 H44 Co N4 Si4, 2(C10 H20 K0.5 O4) |
| Sum formula            | C42 H84 Co K N4 O8 Si4          | C42 H84 Co K N4 O8 Si4                |
| Mr                     | 983.52                          | 983.52                                |
| Dx, g cm <sup>-3</sup> | 1.192                           | 1.192                                 |
| Z                      | 2                               | 2                                     |
| Mu (mm <sup>-1</sup> ) | 0.524                           | 0.524                                 |
| F000                   | 1060.0                          | 1060.0                                |
| F000'                  | 1062.08                         |                                       |
| h, k, lmax             | 14, 17, 25                      | 14, 17, 25                            |
| Nref                   | 12595                           | 12549                                 |
| Tmin, Tmax             | 0.916, 0.964                    | 0.704, 0.746                          |
| Tmin'                  | 0.886                           |                                       |

Correction method= # Reported T Limits: Tmin=0.704 Tmax=0.746  
AbsCorr = MULTISCAN

Data completeness= 0.996

Theta(max)= 27.529

R(reflections)= 0.0420( 9015)

wR2(reflections)= 0.0830( 12549)

S = 1.017

Npar= 584

---

The following ALERTS were generated. Each ALERT has the format

**test-name\_ALERT\_alert-type\_alert-level.**

Click on the hyperlinks for more details of the test.

---

 **Alert level C**

|                   |                |           |                    |                   |       |      |       |
|-------------------|----------------|-----------|--------------------|-------------------|-------|------|-------|
| PLAT220_ALERT_2_C | Non-Solvent    | Resd 3    | C                  | Ueq(max)/Ueq(min) | Range | 3.6  | Ratio |
| PLAT230_ALERT_2_C | Hirshfeld Test | Diff for  | Si21               | --C212            | .     | 5.2  | s.u.  |
| PLAT230_ALERT_2_C | Hirshfeld Test | Diff for  | Si22               | --C222            | .     | 5.2  | s.u.  |
| PLAT241_ALERT_2_C | High           | 'MainMol' | Ueq as Compared to | Neighbors of      |       | O300 | Check |
| PLAT241_ALERT_2_C | High           | 'MainMol' | Ueq as Compared to | Neighbors of      |       | C303 | Check |
| PLAT242_ALERT_2_C | Low            | 'MainMol' | Ueq as Compared to | Neighbors of      |       | K2   | Check |
| PLAT242_ALERT_2_C | Low            | 'MainMol' | Ueq as Compared to | Neighbors of      |       | C304 | Check |

---

 **Alert level G**

|                   |                                |                                 |       |              |
|-------------------|--------------------------------|---------------------------------|-------|--------------|
| PLAT003_ALERT_2_G | Number of Uiso or Uij          | Restrained non-H Atoms ...      | 8     | Report       |
| PLAT042_ALERT_1_G | Calc. and Reported             | MoietyFormula Strings Differ    |       | Please Check |
| PLAT154_ALERT_1_G | The s.u.'s on the              | Cell Angles are Equal ..(Note)  | 0.002 | Degree       |
| PLAT187_ALERT_4_G | The CIF-Embedded               | .res File Contains RIGU Records | 1     | Report       |
| PLAT301_ALERT_3_G | Main Residue                   | Disorder .....(Resd 1 )         | 21%   | Note         |
| PLAT720_ALERT_4_G | Number of Unusual/Non-Standard | Labels .....                    | 20    | Note         |
| PLAT860_ALERT_3_G | Number of Least-Squares        | Restraints .....                | 57    | Note         |
| PLAT883_ALERT_1_G | No Info/Value for              | _atom_sites_solution_primary .  |       | Please Do !  |

---

0 **ALERT level A** = Most likely a serious problem - resolve or explain  
0 **ALERT level B** = A potentially serious problem, consider carefully  
7 **ALERT level C** = Check. Ensure it is not caused by an omission or oversight  
8 **ALERT level G** = General information/check it is not something unexpected

3 ALERT type 1 CIF construction/syntax error, inconsistent or missing data  
8 ALERT type 2 Indicator that the structure model may be wrong or deficient  
2 ALERT type 3 Indicator that the structure quality may be low  
2 ALERT type 4 Improvement, methodology, query or suggestion  
0 ALERT type 5 Informative message, check

---

It is advisable to attempt to resolve as many as possible of the alerts in all categories. Often the minor alerts point to easily fixed oversights, errors and omissions in your CIF or refinement strategy, so attention to these fine details can be worthwhile. In order to resolve some of the more serious problems it may be necessary to carry out additional measurements or structure refinements. However, the purpose of your study may justify the reported deviations and the more serious of these should normally be commented upon in the discussion or experimental section of a paper or in the "special\_details" fields of the CIF. checkCIF was carefully designed to identify outliers and unusual parameters, but every test has its limitations and alerts that are not important in a particular case may appear. Conversely, the absence of alerts does not guarantee there are no aspects of the results needing attention. It is up to the individual to critically assess their own results and, if necessary, seek expert advice.

### **Publication of your CIF in IUCr journals**

A basic structural check has been run on your CIF. These basic checks will be run on all CIFs submitted for publication in IUCr journals (*Acta Crystallographica*, *Journal of Applied Crystallography*, *Journal of Synchrotron Radiation*); however, if you intend to submit to *Acta Crystallographica Section C* or *E* or *IUCrData*, you should make sure that full publication checks are run on the final version of your CIF prior to submission.

### **Publication of your CIF in other journals**

Please refer to the *Notes for Authors* of the relevant journal for any special instructions relating to CIF submission.



# checkCIF/PLATON report

You have not supplied any structure factors. As a result the full set of tests cannot be run.

THIS REPORT IS FOR GUIDANCE ONLY. IF USED AS PART OF A REVIEW PROCEDURE FOR PUBLICATION, IT SHOULD NOT REPLACE THE EXPERTISE OF AN EXPERIENCED CRYSTALLOGRAPHIC REFEREE.

No syntax errors found.      CIF dictionary      Interpreting this report

## Datablock: co4

---

Bond precision:    C-C = 0.0051 A                      Wavelength=0.71073

Cell:                      a=18.7674 (9)              b=18.1030 (8)              c=17.5930 (7)  
                            alpha=90              beta=90              gamma=90  
Temperature:              100 K

|                        | Calculated        | Reported          |
|------------------------|-------------------|-------------------|
| Volume                 | 5977.2 (5)        | 5977.2 (5)        |
| Space group            | P c a 21          | P c a 21          |
| Hall group             | P 2c -2ac         | P 2c -2ac         |
| Moiety formula         | C22 H44 Co N4 Si4 | C22 H44 Co N4 Si4 |
| Sum formula            | C22 H44 Co N4 Si4 | C22 H44 Co N4 Si4 |
| Mr                     | 535.90            | 535.90            |
| Dx, g cm <sup>-3</sup> | 1.191             | 1.191             |
| Z                      | 8                 | 8                 |
| Mu (mm <sup>-1</sup> ) | 0.751             | 0.751             |
| F000                   | 2296.0            | 2296.0            |
| F000'                  | 2301.71           |                   |
| h, k, lmax             | 23, 22, 21        | 23, 22, 21        |
| Nref                   | 11744 [ 6081]     | 10939             |
| Tmin, Tmax             | 0.835, 0.861      | 0.829, 0.935      |
| Tmin'                  | 0.792             |                   |

Correction method= # Reported T Limits: Tmin=0.829 Tmax=0.935  
AbsCorr = NUMERICAL

Data completeness= 1.80/0.93                      Theta(max)= 25.999

R(reflections)= 0.0280 ( 10341)              wR2(reflections)= 0.0679 ( 10939)

S = 1.014                      Npar= 588

---

The following ALERTS were generated. Each ALERT has the format  
**test-name\_ALERT\_alert-type\_alert-level.**  
Click on the hyperlinks for more details of the test.

---

### Alert level C

STRVA01\_ALERT\_4\_C                      Flack test results are ambiguous.  
From the CIF: `_refine_ls_abs_structure_Flack`      0.495  
From the CIF: `_refine_ls_abs_structure_Flack_su`      0.010

---

### Alert level G

PLAT164\_ALERT\_4\_G Nr. of Refined C-H H-Atoms in Heavy-Atom Struct.                      1 Note  
PLAT870\_ALERT\_4\_G ALERTS Related to Twinning Effects Suppressed ..                      ! Info

---

- 0 **ALERT level A** = Most likely a serious problem - resolve or explain
  - 0 **ALERT level B** = A potentially serious problem, consider carefully
  - 1 **ALERT level C** = Check. Ensure it is not caused by an omission or oversight
  - 2 **ALERT level G** = General information/check it is not something unexpected
  
  - 0 ALERT type 1 CIF construction/syntax error, inconsistent or missing data
  - 0 ALERT type 2 Indicator that the structure model may be wrong or deficient
  - 0 ALERT type 3 Indicator that the structure quality may be low
  - 3 ALERT type 4 Improvement, methodology, query or suggestion
  - 0 ALERT type 5 Informative message, check
- 
- 

It is advisable to attempt to resolve as many as possible of the alerts in all categories. Often the minor alerts point to easily fixed oversights, errors and omissions in your CIF or refinement strategy, so attention to these fine details can be worthwhile. In order to resolve some of the more serious problems it may be necessary to carry out additional measurements or structure refinements. However, the purpose of your study may justify the reported deviations and the more serious of these should normally be commented upon in the discussion or experimental section of a paper or in the "special\_details" fields of the CIF. checkCIF was carefully designed to identify outliers and unusual parameters, but every test has its limitations and alerts that are not important in a particular case may appear. Conversely, the absence of alerts does not guarantee there are no aspects of the results needing attention. It is up to the individual to critically assess their own results and, if necessary, seek expert advice.

### Publication of your CIF in IUCr journals

A basic structural check has been run on your CIF. These basic checks will be run on all CIFs submitted for publication in IUCr journals (*Acta Crystallographica*, *Journal of Applied Crystallography*, *Journal of Synchrotron Radiation*); however, if you intend to submit to *Acta Crystallographica Section C* or *E* or *IUCrData*, you should make sure that full publication checks are run on the final version of your CIF prior to submission.

### Publication of your CIF in other journals

Please refer to the *Notes for Authors* of the relevant journal for any special instructions relating to CIF submission.

---



# checkCIF/PLATON report

You have not supplied any structure factors. As a result the full set of tests cannot be run.

THIS REPORT IS FOR GUIDANCE ONLY. IF USED AS PART OF A REVIEW PROCEDURE FOR PUBLICATION, IT SHOULD NOT REPLACE THE EXPERTISE OF AN EXPERIENCED CRYSTALLOGRAPHIC REFEREE.

No syntax errors found.      CIF dictionary      Interpreting this report

## Datablock: zn9

---

Bond precision:    C-C = 0.0072 Å                      Wavelength=0.71073

Cell:                a=18.8806(12)            b=18.0560(13)            c=17.6133(17)  
                      alpha=90                beta=90                gamma=90

Temperature:        100 K

|                        | Calculated        | Reported             |
|------------------------|-------------------|----------------------|
| Volume                 | 6004.5(8)         | 6004.5(8)            |
| Space group            | P c a 21          | P c a 21             |
| Hall group             | P 2c -2ac         | P 2c -2ac            |
| Moiety formula         | C22 H44 N4 Si4 Zn | 2(C22 H44 N4 Si4 Zn) |
| Sum formula            | C22 H44 N4 Si4 Zn | C44 H88 N8 Si8 Zn2   |
| Mr                     | 542.36            | 1084.68              |
| Dx, g cm <sup>-3</sup> | 1.200             | 1.200                |
| Z                      | 8                 | 4                    |
| Mu (mm <sup>-1</sup> ) | 0.994             | 0.994                |
| F000                   | 2320.0            | 2320.0               |
| F000'                  | 2325.18           |                      |
| h, k, lmax             | 23, 22, 21        | 23, 22, 21           |
| Nref                   | 11796[ 6108]      | 11789                |
| Tmin, Tmax             |                   | 0.873, 0.874         |
| Tmin'                  |                   |                      |

Correction method= # Reported T Limits: Tmin=0.873 Tmax=0.874  
AbsCorr = SPHERE

Data completeness= 1.93/1.00                      Theta(max)= 25.998

R(reflections)= 0.0340( 9936)                      wR2(reflections)= 0.0718( 11789)

S = 0.969                                              Npar= 584

---

The following ALERTS were generated. Each ALERT has the format

**test-name\_ALERT\_alert-type\_alert-level.**

Click on the hyperlinks for more details of the test.



### Alert level C

PLAT094\_ALERT\_2\_C Ratio of Maximum / Minimum Residual Density .... 2.70 Report  
 PLAT341\_ALERT\_3\_C Low Bond Precision on C-C Bonds ..... 0.00722 Ang.



### Alert level G

PLAT042\_ALERT\_1\_G Calc. and Reported MoietyFormula Strings Differ Please Check  
 PLAT045\_ALERT\_1\_G Calculated and Reported Z Differ by a Factor ... 2.00 Check  
 PLAT794\_ALERT\_5\_G Tentative Bond Valency for Zn1 (II) . 1.69 Info  
 PLAT794\_ALERT\_5\_G Tentative Bond Valency for Zn2 (II) . 1.67 Info  
 PLAT870\_ALERT\_4\_G ALERTS Related to Twinning Effects Suppressed .. ! Info

- 
- 0 **ALERT level A** = Most likely a serious problem - resolve or explain  
 0 **ALERT level B** = A potentially serious problem, consider carefully  
 2 **ALERT level C** = Check. Ensure it is not caused by an omission or oversight  
 5 **ALERT level G** = General information/check it is not something unexpected
- 2 ALERT type 1 CIF construction/syntax error, inconsistent or missing data  
 1 ALERT type 2 Indicator that the structure model may be wrong or deficient  
 1 ALERT type 3 Indicator that the structure quality may be low  
 1 ALERT type 4 Improvement, methodology, query or suggestion  
 2 ALERT type 5 Informative message, check
- 

It is advisable to attempt to resolve as many as possible of the alerts in all categories. Often the minor alerts point to easily fixed oversights, errors and omissions in your CIF or refinement strategy, so attention to these fine details can be worthwhile. In order to resolve some of the more serious problems it may be necessary to carry out additional measurements or structure refinements. However, the purpose of your study may justify the reported deviations and the more serious of these should normally be commented upon in the discussion or experimental section of a paper or in the "special\_details" fields of the CIF. checkCIF was carefully designed to identify outliers and unusual parameters, but every test has its limitations and alerts that are not important in a particular case may appear. Conversely, the absence of alerts does not guarantee there are no aspects of the results needing attention. It is up to the individual to critically assess their own results and, if necessary, seek expert advice.

### Publication of your CIF in IUCr journals

A basic structural check has been run on your CIF. These basic checks will be run on all CIFs submitted for publication in IUCr journals (*Acta Crystallographica*, *Journal of Applied Crystallography*, *Journal of Synchrotron Radiation*); however, if you intend to submit to *Acta Crystallographica Section C* or *E* or *IUCrData*, you should make sure that full publication checks are run on the final version of your CIF prior to submission.

### Publication of your CIF in other journals

Please refer to the *Notes for Authors* of the relevant journal for any special instructions relating to CIF submission.



# checkCIF/PLATON report

You have not supplied any structure factors. As a result the full set of tests cannot be run.

THIS REPORT IS FOR GUIDANCE ONLY. IF USED AS PART OF A REVIEW PROCEDURE FOR PUBLICATION, IT SHOULD NOT REPLACE THE EXPERTISE OF AN EXPERIENCED CRYSTALLOGRAPHIC REFEREE.

No syntax errors found.      CIF dictionary      Interpreting this report

## Datablock: k18c6zn10

---

Bond precision:    Si- C = 0.0135 A                      Wavelength=0.71073

Cell:                      a=12.1899(7)              b=18.4365(10)              c=22.8273(13)  
                            alpha=90                      beta=95.423(2)              gamma=90  
Temperature:              100 K

|                | Calculated                      | Reported                        |
|----------------|---------------------------------|---------------------------------|
| Volume         | 5107.2(5)                       | 5107.2(5)                       |
| Space group    | P 21/c                          | P 1 21/c 1                      |
| Hall group     | -P 2ybc                         | -P 2ybc                         |
| Moiety formula | C22 H44 N4 Si4 Zn, C16 H34 K O7 | C22 H44 N4 Si4 Zn, C16 H34 K O7 |
| Sum formula    | C38 H78 K N4 O7 Si4 Zn          | C38 H78 K N4 O7 Si4 Zn          |
| Mr             | 919.90                          | 919.87                          |
| Dx, g cm-3     | 1.196                           | 1.196                           |
| Z              | 4                               | 4                               |
| Mu (mm-1)      | 0.700                           | 0.700                           |
| F000           | 1980.0                          | 1980.0                          |
| F000'          | 1983.82                         |                                 |
| h, k, lmax     | 14, 21, 27                      | 14, 21, 27                      |
| Nref           | 8993                            | 8987                            |
| Tmin, Tmax     | 0.732, 0.900                    | 0.665, 0.745                    |
| Tmin'          | 0.702                           |                                 |

Correction method= # Reported T Limits: Tmin=0.665 Tmax=0.745  
AbsCorr = MULTII-SCAN

Data completeness= 0.999                      Theta(max)= 24.999

R(reflections)= 0.1281( 7347)                      wR2(reflections)= 0.2596( 8987)

S = 1.086                      Npar= 693

---

The following ALERTS were generated. Each ALERT has the format

**test-name\_ALERT\_alert-type\_alert-level.**

Click on the hyperlinks for more details of the test.



### Alert level C

|                   |                                                   |       |        |
|-------------------|---------------------------------------------------|-------|--------|
| PLAT082_ALERT_2_C | High R1 Value .....                               | 0.13  | Report |
| PLAT084_ALERT_3_C | High wR2 Value (i.e. > 0.25) .....                | 0.26  | Report |
| PLAT220_ALERT_2_C | Non-Solvent Resd 1 C Ueq(max)/Ueq(min) Range      | 3.9   | Ratio  |
| PLAT222_ALERT_3_C | Non-Solv. Resd 1 H Uiso(max)/Uiso(min) Range      | 4.9   | Ratio  |
| PLAT230_ALERT_2_C | Hirshfeld Test Diff for Si1 --C21 .               | 6.8   | s.u.   |
| PLAT242_ALERT_2_C | Low 'MainMol' Ueq as Compared to Neighbors of Si1 | Check |        |
| PLAT242_ALERT_2_C | Low 'MainMol' Ueq as Compared to Neighbors of K1  | Check |        |



### Alert level G

|                   |                                                  |        |        |
|-------------------|--------------------------------------------------|--------|--------|
| PLAT002_ALERT_2_G | Number of Distance or Angle Restraints on AtSite | 91     | Note   |
| PLAT003_ALERT_2_G | Number of Uiso or Uij Restrained non-H Atoms ... | 79     | Report |
| PLAT083_ALERT_2_G | SHELXL Second Parameter in WGHT Unusually Large  | 100.83 | Why ?  |
| PLAT171_ALERT_4_G | The CIF-Embedded .res File Contains EADP Records | 20     | Report |
| PLAT172_ALERT_4_G | The CIF-Embedded .res File Contains DFIX Records | 1      | Report |
| PLAT176_ALERT_4_G | The CIF-Embedded .res File Contains SADI Records | 70     | Report |
| PLAT178_ALERT_4_G | The CIF-Embedded .res File Contains SIMU Records | 9      | Report |
| PLAT186_ALERT_4_G | The CIF-Embedded .res File Contains ISOR Records | 11     | Report |
| PLAT187_ALERT_4_G | The CIF-Embedded .res File Contains RIGU Records | 9      | Report |
| PLAT230_ALERT_2_G | Hirshfeld Test Diff for Si3A --N4 .              | 6.0    | s.u.   |
| PLAT232_ALERT_2_G | Hirshfeld Test Diff (M-X) Zn1 --N1A .            | 6.0    | s.u.   |
| PLAT300_ALERT_4_G | Atom Site Occupancy of Si3 Constrained at        | 0.5    | Check  |
| PLAT300_ALERT_4_G | Atom Site Occupancy of Si3A Constrained at       | 0.5    | Check  |
| PLAT300_ALERT_4_G | Atom Site Occupancy of Si6 Constrained at        | 0.5    | Check  |
| PLAT300_ALERT_4_G | Atom Site Occupancy of Si6A Constrained at       | 0.5    | Check  |
| PLAT300_ALERT_4_G | Atom Site Occupancy of N1 Constrained at         | 0.5    | Check  |
| PLAT300_ALERT_4_G | Atom Site Occupancy of N1A Constrained at        | 0.5    | Check  |
| PLAT300_ALERT_4_G | Atom Site Occupancy of N2 Constrained at         | 0.5    | Check  |
| PLAT300_ALERT_4_G | Atom Site Occupancy of N2A Constrained at        | 0.5    | Check  |
| PLAT300_ALERT_4_G | Atom Site Occupancy of C1 Constrained at         | 0.5    | Check  |
| PLAT300_ALERT_4_G | Atom Site Occupancy of C1A Constrained at        | 0.5    | Check  |
| PLAT300_ALERT_4_G | Atom Site Occupancy of C2 Constrained at         | 0.5    | Check  |
| PLAT300_ALERT_4_G | Atom Site Occupancy of C2A Constrained at        | 0.5    | Check  |
| PLAT300_ALERT_4_G | Atom Site Occupancy of C3 Constrained at         | 0.5    | Check  |
| PLAT300_ALERT_4_G | Atom Site Occupancy of C3A Constrained at        | 0.5    | Check  |
| PLAT300_ALERT_4_G | Atom Site Occupancy of C4 Constrained at         | 0.5    | Check  |
| PLAT300_ALERT_4_G | Atom Site Occupancy of C4A Constrained at        | 0.5    | Check  |
| PLAT300_ALERT_4_G | Atom Site Occupancy of C5 Constrained at         | 0.5    | Check  |
| PLAT300_ALERT_4_G | Atom Site Occupancy of C5A Constrained at        | 0.5    | Check  |
| PLAT300_ALERT_4_G | Atom Site Occupancy of C6 Constrained at         | 0.5    | Check  |
| PLAT300_ALERT_4_G | Atom Site Occupancy of C6A Constrained at        | 0.5    | Check  |
| PLAT300_ALERT_4_G | Atom Site Occupancy of C7 Constrained at         | 0.5    | Check  |
| PLAT300_ALERT_4_G | Atom Site Occupancy of C7A Constrained at        | 0.5    | Check  |
| PLAT300_ALERT_4_G | Atom Site Occupancy of C8 Constrained at         | 0.5    | Check  |
| PLAT300_ALERT_4_G | Atom Site Occupancy of C8A Constrained at        | 0.5    | Check  |
| PLAT300_ALERT_4_G | Atom Site Occupancy of C9 Constrained at         | 0.5    | Check  |
| PLAT300_ALERT_4_G | Atom Site Occupancy of C9A Constrained at        | 0.5    | Check  |
| PLAT300_ALERT_4_G | Atom Site Occupancy of C10 Constrained at        | 0.5    | Check  |
| PLAT300_ALERT_4_G | Atom Site Occupancy of C10A Constrained at       | 0.5    | Check  |
| PLAT300_ALERT_4_G | Atom Site Occupancy of C19 Constrained at        | 0.5    | Check  |
| PLAT300_ALERT_4_G | Atom Site Occupancy of C20 Constrained at        | 0.5    | Check  |
| PLAT300_ALERT_4_G | Atom Site Occupancy of C23 Constrained at        | 0.5    | Check  |
| PLAT300_ALERT_4_G | Atom Site Occupancy of C23A Constrained at       | 0.5    | Check  |
| PLAT300_ALERT_4_G | Atom Site Occupancy of C24 Constrained at        | 0.5    | Check  |
| PLAT300_ALERT_4_G | Atom Site Occupancy of C24A Constrained at       | 0.5    | Check  |

[illegible]

[illegible]

[illegible]

|                   |                                                  |       |        |
|-------------------|--------------------------------------------------|-------|--------|
| PLAT779_ALERT_4_G | Suspect or Irrelevant (Bond) Angle(s) in CIF . # | 204   | Check  |
| K1                | -C34 -H34A 1.555 1.555 1.555                     | 31.20 | Deg.   |
| PLAT779_ALERT_4_G | Suspect or Irrelevant (Bond) Angle(s) in CIF . # | 319   | Check  |
| O3                | -C62 -K1 1.555 1.555 1.555                       | 41.60 | Deg.   |
| PLAT779_ALERT_4_G | Suspect or Irrelevant (Bond) Angle(s) in CIF . # | 365   | Check  |
| O13               | -C40 -K1 1.555 1.555 1.555                       | 41.20 | Deg.   |
| PLAT789_ALERT_4_G | Atoms with Negative _atom_site_disorder_group #  | 26    | Check  |
| PLAT811_ALERT_5_G | No ADDSYM Analysis: Too Many Excluded Atoms .... |       | ! Info |
| PLAT860_ALERT_3_G | Number of Least-Squares Restraints .....         | 1954  | Note   |
| PLAT933_ALERT_2_G | Number of OMIT Records in Embedded .res File ... | 1     | Note   |

---

0 **ALERT level A** = Most likely a serious problem - resolve or explain  
 0 **ALERT level B** = A potentially serious problem, consider carefully  
 7 **ALERT level C** = Check. Ensure it is not caused by an omission or oversight  
 236 **ALERT level G** = General information/check it is not something unexpected

0 ALERT type 1 CIF construction/syntax error, inconsistent or missing data  
 13 ALERT type 2 Indicator that the structure model may be wrong or deficient  
 4 ALERT type 3 Indicator that the structure quality may be low  
 225 ALERT type 4 Improvement, methodology, query or suggestion  
 1 ALERT type 5 Informative message, check

---

It is advisable to attempt to resolve as many as possible of the alerts in all categories. Often the minor alerts point to easily fixed oversights, errors and omissions in your CIF or refinement strategy, so attention to these fine details can be worthwhile. In order to resolve some of the more serious problems it may be necessary to carry out additional measurements or structure refinements. However, the purpose of your study may justify the reported deviations and the more serious of these should normally be commented upon in the discussion or experimental section of a paper or in the "special\_details" fields of the CIF. checkCIF was carefully designed to identify outliers and unusual parameters, but every test has its limitations and alerts that are not important in a particular case may appear. Conversely, the absence of alerts does not guarantee there are no aspects of the results needing attention. It is up to the individual to critically assess their own results and, if necessary, seek expert advice.

### Publication of your CIF in IUCr journals

A basic structural check has been run on your CIF. These basic checks will be run on all CIFs submitted for publication in IUCr journals (*Acta Crystallographica*, *Journal of Applied Crystallography*, *Journal of Synchrotron Radiation*); however, if you intend to submit to *Acta Crystallographica Section C* or *E* or *IUCrData*, you should make sure that full publication checks are run on the final version of your CIF prior to submission.

### Publication of your CIF in other journals

Please refer to the *Notes for Authors* of the relevant journal for any special instructions relating to CIF submission.
