# Supplementary material
Source: MDPI journal article supplement (https://www.mdpi.com/2304-6740/7/10/117)
Supplement: s1 [file s1]

Archive with 12 entries (10 files):
- inorganics-584457-Supplementary Materials/
- inorganics-584457-Supplementary Materials/CIF and CIFcheck files/
- inorganics-584457-Supplementary Materials/CIF and CIFcheck files/Cifcheck.pdf
- inorganics-584457-Supplementary Materials/CIF and CIFcheck files/Co8.cif
- inorganics-584457-Supplementary Materials/CIF and CIFcheck files/K(18c6)Co4.cif
- inorganics-584457-Supplementary Materials/CIF and CIFcheck files/K(18c6)Cr1.cif
- inorganics-584457-Supplementary Materials/CIF and CIFcheck files/K(18c6)Fe3.cif
- inorganics-584457-Supplementary Materials/CIF and CIFcheck files/K(18c6)Mn2.cif
- inorganics-584457-Supplementary Materials/CIF and CIFcheck files/K(18c6)Zn10.cif
- inorganics-584457-Supplementary Materials/CIF and CIFcheck files/Zn9.cif
- inorganics-584457-Supplementary Materials/inorganics-584457-Supplementary Materials.docx
- inorganics-584457-Supplementary Materials/inorganics-584457-Supplementary Materials.pdf
