# Supplementary material
Source: MDPI journal article supplement (https://www.mdpi.com/2304-6740/7/10/117)
Supplement: s1 [file s1 › inorganics-584457-Supplementary Materials/CIF and CIFcheck files/Co8.cif]

####################################################################### 
# 
# This file contains crystal structure data downloaded from the 
# Cambridge Structural Database (CSD) hosted by the Cambridge 
# Crystallographic Data Centre (CCDC).
# 
# Full information about CCDC data access policies and citation 
# guidelines are available at http://www.ccdc.cam.ac.uk/access/V1 
# 
# Audit and citation data items may have been added by the CCDC. 
# Please retain this information to preserve the provenance of 
# this file and to allow appropriate attribution of the data. 
# 
#######################################################################

data_co4
_database_code_depnum_ccdc_archive 'CCDC 1918202'
loop_
_audit_author_name
_audit_author_address
'Igor Mueller'
;Philipps University Marburg
Germany
;
_audit_update_record             
;
2019-05-23 deposited with the CCDC.	2019-08-14 downloaded from the CCDC.
;
_audit_creation_date             2019-05-23
_audit_creation_method           
;
Olex2 1.2-alpha
(compiled 2018.07.26 svn.r3523 for OlexSys, GUI svn.r5532)
;
_shelx_SHELXL_version_number     2018/3
_audit_contact_author_address    Philipps-University
_audit_contact_author_email      gunnar.werncke@chemie.uni-marburg.de
_audit_contact_author_name       C.
_audit_contact_author_phone      +4964212825637
_publ_contact_author_id_orcid    299638391
_publ_section_references         
;
Dolomanov, O.V., Bourhis, L.J., Gildea, R.J, Howard, J.A.K. & Puschmann, H.
 (2009), J. Appl. Cryst. 42, 339-341.

Sheldrick, G.M. (2015). Acta Cryst. C71, 3-8.
;
_chemical_name_common            ?
_chemical_name_systematic        ?
_chemical_formula_moiety         'C22 H44 Co N4 Si4'
_chemical_formula_sum            'C22 H44 Co N4 Si4'
_chemical_formula_weight         535.90
_chemical_absolute_configuration ad
_chemical_melting_point          ?
loop_
_atom_type_symbol
_atom_type_description
_atom_type_scat_dispersion_real
_atom_type_scat_dispersion_imag
_atom_type_scat_source
C C 0.0033 0.0016 'International Tables Vol C Tables 4.2.6.8 and 6.1.1.4'
H H 0.0000 0.0000 'International Tables Vol C Tables 4.2.6.8 and 6.1.1.4'
Co Co 0.3494 0.9721 'International Tables Vol C Tables 4.2.6.8 and 6.1.1.4'
N N 0.0061 0.0033 'International Tables Vol C Tables 4.2.6.8 and 6.1.1.4'
Si Si 0.0817 0.0704 'International Tables Vol C Tables 4.2.6.8 and 6.1.1.4'

_shelx_space_group_comment       
;
The symmetry employed for this shelxl refinement is uniquely defined
by the following loop, which should always be used as a source of
symmetry information in preference to the above space-group names.
They are only intended as comments.
;
_space_group_crystal_system      orthorhombic
_space_group_IT_number           29
_space_group_name_H-M_alt        'P c a 21'
_space_group_name_Hall           'P 2c -2ac'
loop_
_space_group_symop_operation_xyz
'x, y, z'
'-x, -y, z+1/2'
'x+1/2, -y, z'
'-x+1/2, y, z+1/2'

_cell_length_a                   18.7674(9)
_cell_length_b                   18.1030(8)
_cell_length_c                   17.5930(7)
_cell_angle_alpha                90
_cell_angle_beta                 90
_cell_angle_gamma                90
_cell_volume                     5977.2(5)
_cell_formula_units_Z            8
_cell_measurement_reflns_used    28582
_cell_measurement_temperature    100
_cell_measurement_theta_max      30.00
_cell_measurement_theta_min      1.485
_shelx_estimated_absorpt_T_max   0.864
_shelx_estimated_absorpt_T_min   0.801
_exptl_absorpt_coefficient_mu    0.751
_exptl_absorpt_correction_T_max  0.9352
_exptl_absorpt_correction_T_min  0.8292
_exptl_absorpt_correction_type   numerical
_exptl_absorpt_process_details   'STOE X-Area'
_exptl_absorpt_special_details   ?
_exptl_crystal_colour            'clear dark red'
_exptl_crystal_colour_lustre     clear
_exptl_crystal_colour_modifier   dark
_exptl_crystal_colour_primary    red
_exptl_crystal_density_diffrn    1.191
_exptl_crystal_density_meas      ?
_exptl_crystal_density_method    ?
_exptl_crystal_description       block
_exptl_crystal_F_000             2296
_exptl_crystal_preparation       ?
_exptl_crystal_size_max          0.31
_exptl_crystal_size_mid          0.2
_exptl_crystal_size_min          0.2
_exptl_transmission_factor_max   ?
_exptl_transmission_factor_min   ?
_diffrn_reflns_av_R_equivalents  0.0219
_diffrn_reflns_av_unetI/netI     0.0228
_diffrn_reflns_Laue_measured_fraction_full 0.998
_diffrn_reflns_Laue_measured_fraction_max 0.998
_diffrn_reflns_limit_h_max       21
_diffrn_reflns_limit_h_min       -23
_diffrn_reflns_limit_k_max       22
_diffrn_reflns_limit_k_min       -19
_diffrn_reflns_limit_l_max       21
_diffrn_reflns_limit_l_min       -19
_diffrn_reflns_number            20518
_diffrn_reflns_point_group_measured_fraction_full 0.934
_diffrn_reflns_point_group_measured_fraction_max 0.931
_diffrn_reflns_theta_full        25.242
_diffrn_reflns_theta_max         25.999
_diffrn_reflns_theta_min         1.945
_diffrn_ambient_temperature      100
_diffrn_detector_area_resol_mean ?
_diffrn_measured_fraction_theta_full 0.998
_diffrn_measured_fraction_theta_max 0.998
_diffrn_measurement_device_type  'STOE IPDS-2'
_diffrn_measurement_method       '\w scans'
_diffrn_radiation_type           MoK\a
_diffrn_radiation_wavelength     0.71073
_diffrn_source                   ?
_diffrn_standards_number         0
_reflns_Friedel_coverage         0.803
_reflns_Friedel_fraction_full    0.866
_reflns_Friedel_fraction_max     0.860
_reflns_number_gt                10341
_reflns_number_total             10939
_reflns_special_details          
;
 Reflections were merged by SHELXL according to the crystal
 class for the calculation of statistics and refinement.
 
 _reflns_Friedel_fraction is defined as the number of unique
 Friedel pairs measured divided by the number that would be
 possible theoretically, ignoring centric projections and
 systematic absences. Completness statistics refer to single and
 composite reflections containing twin component 1 only.
;
_reflns_threshold_expression     'I > 2\s(I)'
_computing_cell_refinement       ?
_computing_data_collection       ?
_computing_data_reduction        ?
_computing_molecular_graphics    'Olex2 (Dolomanov et al., 2009)'
_computing_publication_material  'Olex2 (Dolomanov et al., 2009)'
_computing_structure_refinement  'ShelXL (Sheldrick, 2015)'
_computing_structure_solution    'XT (Sheldrick, 2015)'
_refine_diff_density_max         0.454
_refine_diff_density_min         -0.251
_refine_diff_density_rms         0.055
_refine_ls_abs_structure_details 
;
 Refined as an inversion twin.
;
_refine_ls_abs_structure_Flack   0.495(10)
_refine_ls_extinction_coef       .
_refine_ls_extinction_method     none
_refine_ls_goodness_of_fit_ref   1.014
_refine_ls_hydrogen_treatment    mixed
_refine_ls_matrix_type           full
_refine_ls_number_parameters     588
_refine_ls_number_reflns         10939
_refine_ls_number_restraints     1
_refine_ls_R_factor_all          0.0307
_refine_ls_R_factor_gt           0.0280
_refine_ls_restrained_S_all      1.014
_refine_ls_shift/su_max          0.001
_refine_ls_shift/su_mean         0.000
_refine_ls_structure_factor_coef Fsqd
_refine_ls_weighting_details     
'w=1/[\s^2^(Fo^2^)+(0.0514P)^2^] where P=(Fo^2^+2Fc^2^)/3'
_refine_ls_weighting_scheme      calc
_refine_ls_wR_factor_gt          0.0670
_refine_ls_wR_factor_ref         0.0679
_refine_special_details          
;
 Refined as a 2-component inversion twin.
;
_olex2_refinement_description    
;
1. Twinned data refinement
 Scales: 0.505(10)
 0.495(10)
2. Fixed Uiso
 At 1.2 times of:
  All C(H) groups
 At 1.5 times of:
  All C(H,H,H) groups
3.a Aromatic/amide H refined with riding coordinates:
 C1A(H1A), C2A(H2A), C3A(H3A), C4A(H4A), C7A(H7A), C8A(H8A), C9A(H9A),
 C10A(H10A), C1B(H1B), C2B(H2B), C3B(H3B), C7B(H7B), C8B(H8B), C9B(H9B),
 C10B(H10B)
3.b Idealised Me refined as rotating group:
 C11A(H11A,H11B,H11C), C12A(H12A,H12B,H12C), C13A(H13A,H13B,H13C), C14A(H14A,
 H14B,H14C), C15A(H15A,H15B,H15C), C16A(H16A,H16B,H16C), C17A(H17A,H17B,H17C),
 C18A(H18A,H18B,H18C), C19A(H19A,H19B,H19C), C20A(H20A,H20B,H20C), C21A(H21A,
 H21B,H21C), C22A(H22A,H22B,H22C), C11B(H11D,H11E,H11F), C12B(H12D,H12E,H12F),
 C13B(H13D,H13E,H13F), C14B(H14D,H14E,H14F), C15B(H15D,H15E,H15F), C16B(H16D,
 H16E,H16F), C17B(H17D,H17E,H17F), C18B(H18D,H18E,H18F), C19B(H19D,H19E,H19F),
 C20B(H20D,H20E,H20F), C21B(H21D,H21E,H21F), C22B(H22D,H22E,H22F)
;
_atom_sites_solution_hydrogens   mixed
_atom_sites_solution_primary     dual
_atom_sites_solution_secondary   ?
loop_
_atom_site_label
_atom_site_type_symbol
_atom_site_fract_x
_atom_site_fract_y
_atom_site_fract_z
_atom_site_U_iso_or_equiv
_atom_site_adp_type
_atom_site_occupancy
_atom_site_site_symmetry_order
_atom_site_calc_flag
_atom_site_refinement_flags_posn
_atom_site_refinement_flags_adp
_atom_site_refinement_flags_occupancy
_atom_site_disorder_assembly
_atom_site_disorder_group
Co1A Co 0.60402(2) 0.95667(2) 0.60855(2) 0.01765(9) Uani 1 1 d . . . . .
Si1A Si 0.71692(4) 0.83978(4) 0.64845(5) 0.01819(16) Uani 1 1 d . . . . .
Si2A Si 0.69498(4) 0.96850(4) 0.75894(5) 0.01888(17) Uani 1 1 d . . . . .
Si3A Si 0.66617(5) 1.10782(5) 0.54611(5) 0.02414(18) Uani 1 1 d . . . . .
Si4A Si 0.50957(5) 1.09552(5) 0.57578(5) 0.02509(19) Uani 1 1 d . . . . .
N1A N 0.57793(14) 0.90532(14) 0.50379(15) 0.0210(5) Uani 1 1 d . . . . .
N2A N 0.51592(14) 0.89113(15) 0.63776(15) 0.0229(5) Uani 1 1 d . . . . .
N3A N 0.67756(14) 0.91975(14) 0.67798(14) 0.0191(5) Uani 1 1 d . . . . .
N4A N 0.59404(14) 1.06107(14) 0.58135(15) 0.0220(5) Uani 1 1 d . . . . .
C1A C 0.60858(18) 0.92012(19) 0.43711(19) 0.0256(7) Uani 1 1 d . . . . .
H1A H 0.651750 0.947520 0.436772 0.031 Uiso 1 1 calc R . . . .
C2A C 0.58029(19) 0.89736(19) 0.3685(2) 0.0297(7) Uani 1 1 d . . . . .
H2A H 0.603794 0.908557 0.322121 0.036 Uiso 1 1 calc R . . . .
C3A C 0.5173(2) 0.85806(19) 0.3686(2) 0.0318(7) Uani 1 1 d . . . . .
H3A H 0.496771 0.841816 0.322151 0.038 Uiso 1 1 calc R . . . .
C4A C 0.48420(19) 0.84258(19) 0.4372(2) 0.0289(7) Uani 1 1 d . . . . .
H4A H 0.440659 0.815843 0.438486 0.035 Uiso 1 1 calc R . . . .
C5A C 0.51620(17) 0.86709(17) 0.50438(19) 0.0232(6) Uani 1 1 d . . . . .
C6A C 0.48468(18) 0.85424(18) 0.5802(2) 0.0256(7) Uani 1 1 d . . . . .
C7A C 0.4275(2) 0.8070(2) 0.5933(2) 0.0403(9) Uani 1 1 d . . . . .
H7A H 0.405968 0.781355 0.552149 0.048 Uiso 1 1 calc R . . . .
C8A C 0.4025(2) 0.7976(3) 0.6661(3) 0.0478(11) Uani 1 1 d . . . . .
H8A H 0.362417 0.766928 0.675452 0.057 Uiso 1 1 calc R . . . .
C9A C 0.4364(2) 0.8333(2) 0.7256(2) 0.0380(9) Uani 1 1 d . . . . .
H9A H 0.421062 0.826442 0.776561 0.046 Uiso 1 1 calc R . . . .
C10A C 0.49310(19) 0.8793(2) 0.7087(2) 0.0293(7) Uani 1 1 d . . . . .
H10A H 0.516904 0.903453 0.749383 0.035 Uiso 1 1 calc R . . . .
C11A C 0.64984(19) 0.76382(17) 0.6318(2) 0.0285(7) Uani 1 1 d . . . . .
H11A H 0.620278 0.757703 0.677298 0.043 Uiso 1 1 calc GR . . . .
H11B H 0.674900 0.717508 0.621008 0.043 Uiso 1 1 calc GR . . . .
H11C H 0.619501 0.776817 0.588489 0.043 Uiso 1 1 calc GR . . . .
C12A C 0.76728(19) 0.85001(19) 0.55679(19) 0.0275(7) Uani 1 1 d . . . . .
H12A H 0.734179 0.863742 0.516092 0.041 Uiso 1 1 calc GR . . . .
H12B H 0.790380 0.803067 0.544060 0.041 Uiso 1 1 calc GR . . . .
H12C H 0.803555 0.888568 0.562404 0.041 Uiso 1 1 calc GR . . . .
C13A C 0.78260(19) 0.7987(2) 0.7170(2) 0.0306(7) Uani 1 1 d . . . . .
H13A H 0.806264 0.756362 0.693257 0.046 Uiso 1 1 calc GR . . . .
H13B H 0.757549 0.782460 0.762919 0.046 Uiso 1 1 calc GR . . . .
H13C H 0.818282 0.835991 0.730625 0.046 Uiso 1 1 calc GR . . . .
C14A C 0.70167(19) 0.90976(19) 0.84707(19) 0.0279(7) Uani 1 1 d . . . . .
H14A H 0.661100 0.875738 0.849132 0.042 Uiso 1 1 calc GR . . . .
H14B H 0.701267 0.941575 0.892131 0.042 Uiso 1 1 calc GR . . . .
H14C H 0.746138 0.881399 0.845774 0.042 Uiso 1 1 calc GR . . . .
C15A C 0.62301(19) 1.03748(19) 0.7804(2) 0.0284(7) Uani 1 1 d . . . . .
H15A H 0.578618 1.011370 0.792186 0.043 Uiso 1 1 calc GR . . . .
H15B H 0.615666 1.069392 0.736079 0.043 Uiso 1 1 calc GR . . . .
H15C H 0.637169 1.067667 0.824086 0.043 Uiso 1 1 calc GR . . . .
C16A C 0.78017(19) 1.02333(19) 0.7542(2) 0.0298(7) Uani 1 1 d . . . . .
H16A H 0.790867 1.043781 0.804541 0.045 Uiso 1 1 calc GR . . . .
H16B H 0.774708 1.063725 0.717615 0.045 Uiso 1 1 calc GR . . . .
H16C H 0.819242 0.991021 0.738126 0.045 Uiso 1 1 calc GR . . . .
C17A C 0.6937(2) 1.18822(19) 0.6076(2) 0.0352(8) Uani 1 1 d . . . . .
H17A H 0.656169 1.225870 0.606976 0.053 Uiso 1 1 calc GR . . . .
H17B H 0.738052 1.209457 0.588015 0.053 Uiso 1 1 calc GR . . . .
H17C H 0.701120 1.171100 0.659881 0.053 Uiso 1 1 calc GR . . . .
C18A C 0.74771(19) 1.04841(19) 0.5372(2) 0.0296(7) Uani 1 1 d . . . . .
H18A H 0.755561 1.021756 0.584993 0.044 Uiso 1 1 calc GR . . . .
H18B H 0.789142 1.079580 0.526248 0.044 Uiso 1 1 calc GR . . . .
H18C H 0.741008 1.012863 0.495832 0.044 Uiso 1 1 calc GR . . . .
C19A C 0.6496(2) 1.1452(2) 0.4477(2) 0.0362(8) Uani 1 1 d . . . . .
H19A H 0.614076 1.184814 0.450295 0.054 Uiso 1 1 calc GR . . . .
H19B H 0.631821 1.105455 0.414970 0.054 Uiso 1 1 calc GR . . . .
H19C H 0.694138 1.164687 0.426817 0.054 Uiso 1 1 calc GR . . . .
C20A C 0.5055(2) 1.1990(2) 0.5889(2) 0.0395(9) Uani 1 1 d . . . . .
H20A H 0.455827 1.215436 0.586364 0.059 Uiso 1 1 calc GR . . . .
H20B H 0.533012 1.223181 0.548530 0.059 Uiso 1 1 calc GR . . . .
H20C H 0.525669 1.212148 0.638442 0.059 Uiso 1 1 calc GR . . . .
C21A C 0.4654(2) 1.0726(2) 0.4830(2) 0.0324(8) Uani 1 1 d . . . . .
H21A H 0.418876 1.096990 0.480401 0.049 Uiso 1 1 calc GR . . . .
H21B H 0.458960 1.018974 0.479134 0.049 Uiso 1 1 calc GR . . . .
H21C H 0.495367 1.089750 0.440893 0.049 Uiso 1 1 calc GR . . . .
C22A C 0.4492(2) 1.0582(2) 0.6520(2) 0.0391(9) Uani 1 1 d . . . . .
H22A H 0.407239 1.090115 0.656809 0.059 Uiso 1 1 calc GR . . . .
H22B H 0.474836 1.056996 0.700551 0.059 Uiso 1 1 calc GR . . . .
H22C H 0.434055 1.008108 0.638492 0.059 Uiso 1 1 calc GR . . . .
Co1B Co 0.38069(2) 0.51972(2) 0.36876(2) 0.01667(9) Uani 1 1 d . . . . .
Si1B Si 0.28757(5) 0.66257(5) 0.34579(5) 0.02179(18) Uani 1 1 d . . . . .
Si2B Si 0.26642(5) 0.53452(5) 0.23980(5) 0.02306(18) Uani 1 1 d . . . . .
Si3B Si 0.30595(4) 0.38888(4) 0.45497(5) 0.01718(16) Uani 1 1 d . . . . .
Si4B Si 0.45077(4) 0.36363(4) 0.38519(5) 0.01925(17) Uani 1 1 d . . . . .
N1B N 0.43751(14) 0.56843(14) 0.45881(15) 0.0210(5) Uani 1 1 d . . . . .
N2B N 0.46804(14) 0.56822(15) 0.31234(15) 0.0215(5) Uani 1 1 d . . . . .
N3B N 0.30308(14) 0.57326(14) 0.31913(15) 0.0188(5) Uani 1 1 d . . . . .
N4B N 0.37608(13) 0.41585(13) 0.39970(15) 0.0182(5) Uani 1 1 d . . . . .
C1B C 0.42268(18) 0.55897(18) 0.53273(19) 0.0252(7) Uani 1 1 d . . . . .
H1B H 0.379898 0.534257 0.546351 0.030 Uiso 1 1 calc R . . . .
C2B C 0.4673(2) 0.5838(2) 0.58999(19) 0.0320(8) Uani 1 1 d . . . . .
H2B H 0.455344 0.576475 0.641918 0.038 Uiso 1 1 calc R . . . .
C3B C 0.5294(2) 0.6194(2) 0.5699(2) 0.0368(9) Uani 1 1 d . . . . .
H3B H 0.560767 0.637237 0.608044 0.044 Uiso 1 1 calc R . . . .
C4B C 0.5457(2) 0.6291(2) 0.4940(2) 0.0308(7) Uani 1 1 d . . . . .
H4B H 0.590(2) 0.652(2) 0.480(2) 0.033(11) Uiso 1 1 d . . . . .
C5B C 0.49835(17) 0.60292(17) 0.43929(18) 0.0218(6) Uani 1 1 d . . . . .
C6B C 0.51062(16) 0.61079(16) 0.35657(19) 0.0222(6) Uani 1 1 d . . . . .
C7B C 0.55889(18) 0.6604(2) 0.3254(2) 0.0302(7) Uani 1 1 d . . . . .
H7B H 0.589021 0.688953 0.357308 0.036 Uiso 1 1 calc R . . . .
C8B C 0.5625(2) 0.6676(2) 0.2473(2) 0.0365(8) Uani 1 1 d . . . . .
H8B H 0.594413 0.702107 0.224949 0.044 Uiso 1 1 calc R . . . .
C9B C 0.5191(2) 0.6241(2) 0.2020(2) 0.0331(8) Uani 1 1 d . . . . .
H9B H 0.521231 0.627503 0.148176 0.040 Uiso 1 1 calc R . . . .
C10B C 0.47265(18) 0.57555(18) 0.23686(19) 0.0257(7) Uani 1 1 d . . . . .
H10B H 0.442599 0.546017 0.205792 0.031 Uiso 1 1 calc R . . . .
C11B C 0.3579(2) 0.7273(2) 0.3089(3) 0.0448(10) Uani 1 1 d . . . . .
H11D H 0.403821 0.715341 0.332524 0.067 Uiso 1 1 calc GR . . . .
H11E H 0.344852 0.778279 0.321422 0.067 Uiso 1 1 calc GR . . . .
H11F H 0.361826 0.721997 0.253653 0.067 Uiso 1 1 calc GR . . . .
C12B C 0.2863(3) 0.6772(2) 0.4511(2) 0.0504(12) Uani 1 1 d . . . . .
H12D H 0.249477 0.645998 0.474023 0.076 Uiso 1 1 calc GR . . . .
H12E H 0.275994 0.729216 0.462110 0.076 Uiso 1 1 calc GR . . . .
H12F H 0.332916 0.664165 0.472451 0.076 Uiso 1 1 calc GR . . . .
C13B C 0.2001(2) 0.6993(2) 0.3103(3) 0.0426(10) Uani 1 1 d . . . . .
H13D H 0.194922 0.687436 0.256189 0.064 Uiso 1 1 calc GR . . . .
H13E H 0.198747 0.752960 0.317115 0.064 Uiso 1 1 calc GR . . . .
H13F H 0.161111 0.676523 0.338939 0.064 Uiso 1 1 calc GR . . . .
C14B C 0.1691(2) 0.5126(2) 0.2507(3) 0.0456(10) Uani 1 1 d . . . . .
H14D H 0.151750 0.488057 0.204647 0.068 Uiso 1 1 calc GR . . . .
H14E H 0.142342 0.558469 0.258724 0.068 Uiso 1 1 calc GR . . . .
H14F H 0.162328 0.479884 0.294516 0.068 Uiso 1 1 calc GR . . . .
C15B C 0.2760(3) 0.5943(2) 0.1529(2) 0.0453(11) Uani 1 1 d . . . . .
H15D H 0.254235 0.642642 0.162491 0.068 Uiso 1 1 calc GR . . . .
H15E H 0.252119 0.570641 0.109763 0.068 Uiso 1 1 calc GR . . . .
H15F H 0.326664 0.600857 0.141135 0.068 Uiso 1 1 calc GR . . . .
C16B C 0.3090(2) 0.44381(18) 0.2146(2) 0.0291(7) Uani 1 1 d . . . . .
H16D H 0.359498 0.451722 0.202843 0.044 Uiso 1 1 calc GR . . . .
H16E H 0.284993 0.422643 0.170249 0.044 Uiso 1 1 calc GR . . . .
H16F H 0.304845 0.409757 0.257715 0.044 Uiso 1 1 calc GR . . . .
C17B C 0.24032(18) 0.46564(18) 0.47017(19) 0.0250(7) Uani 1 1 d . . . . .
H17D H 0.202279 0.448696 0.504117 0.038 Uiso 1 1 calc GR . . . .
H17E H 0.219766 0.480267 0.421225 0.038 Uiso 1 1 calc GR . . . .
H17F H 0.264624 0.508050 0.493109 0.038 Uiso 1 1 calc GR . . . .
C18B C 0.25244(18) 0.31097(18) 0.41246(19) 0.0261(7) Uani 1 1 d . . . . .
H18D H 0.213242 0.298080 0.446794 0.039 Uiso 1 1 calc GR . . . .
H18E H 0.283250 0.267827 0.405225 0.039 Uiso 1 1 calc GR . . . .
H18F H 0.233029 0.326503 0.363287 0.039 Uiso 1 1 calc GR . . . .
C19B C 0.33517(18) 0.35870(17) 0.55269(18) 0.0238(6) Uani 1 1 d . . . . .
H19D H 0.356108 0.400777 0.579696 0.036 Uiso 1 1 calc GR . . . .
H19E H 0.370710 0.319284 0.548070 0.036 Uiso 1 1 calc GR . . . .
H19F H 0.293895 0.340335 0.581097 0.036 Uiso 1 1 calc GR . . . .
C20B C 0.4350(2) 0.26123(18) 0.3927(2) 0.0295(7) Uani 1 1 d . . . . .
H20D H 0.403542 0.245277 0.351322 0.044 Uiso 1 1 calc GR . . . .
H20E H 0.412577 0.250005 0.441643 0.044 Uiso 1 1 calc GR . . . .
H20F H 0.480564 0.235094 0.388925 0.044 Uiso 1 1 calc GR . . . .
C21B C 0.52401(19) 0.3883(2) 0.4540(2) 0.0339(8) Uani 1 1 d . . . . .
H21D H 0.539406 0.439246 0.444943 0.051 Uiso 1 1 calc GR . . . .
H21E H 0.564430 0.354754 0.446678 0.051 Uiso 1 1 calc GR . . . .
H21F H 0.506255 0.383635 0.506176 0.051 Uiso 1 1 calc GR . . . .
C22B C 0.48832(19) 0.37611(19) 0.28738(19) 0.0273(7) Uani 1 1 d . . . . .
H22D H 0.452733 0.361204 0.249608 0.041 Uiso 1 1 calc GR . . . .
H22E H 0.531074 0.345528 0.281708 0.041 Uiso 1 1 calc GR . . . .
H22F H 0.500790 0.428142 0.279645 0.041 Uiso 1 1 calc GR . . . .

loop_
_atom_site_aniso_label
_atom_site_aniso_U_11
_atom_site_aniso_U_22
_atom_site_aniso_U_33
_atom_site_aniso_U_23
_atom_site_aniso_U_13
_atom_site_aniso_U_12
Co1A 0.01906(18) 0.01800(18) 0.01588(19) 0.00164(15) -0.00098(15) 0.00072(15)
Si1A 0.0196(4) 0.0174(4) 0.0175(4) -0.0009(3) -0.0015(3) 0.0015(3)
Si2A 0.0212(4) 0.0200(4) 0.0155(4) -0.0012(3) -0.0008(3) 0.0006(3)
Si3A 0.0341(5) 0.0190(4) 0.0193(4) 0.0020(3) 0.0028(4) -0.0027(3)
Si4A 0.0301(5) 0.0251(4) 0.0200(4) 0.0024(3) 0.0004(4) 0.0097(4)
N1A 0.0219(13) 0.0207(12) 0.0203(13) -0.0008(10) -0.0016(10) 0.0017(10)
N2A 0.0206(13) 0.0264(13) 0.0217(14) 0.0020(10) 0.0009(10) 0.0013(11)
N3A 0.0221(13) 0.0202(12) 0.0150(12) 0.0002(9) -0.0009(10) 0.0021(10)
N4A 0.0280(14) 0.0196(12) 0.0184(13) 0.0031(9) -0.0002(10) 0.0027(10)
C1A 0.0258(16) 0.0290(16) 0.0220(17) 0.0005(12) 0.0019(12) 0.0015(13)
C2A 0.0347(18) 0.0338(17) 0.0206(16) -0.0020(14) 0.0006(14) 0.0051(14)
C3A 0.0404(19) 0.0311(16) 0.0239(17) -0.0054(14) -0.0086(15) 0.0047(14)
C4A 0.0293(17) 0.0292(17) 0.0280(18) -0.0011(13) -0.0064(13) -0.0018(14)
C5A 0.0237(16) 0.0205(14) 0.0253(17) 0.0003(12) -0.0048(13) 0.0021(12)
C6A 0.0243(16) 0.0250(15) 0.0276(17) 0.0071(12) -0.0042(13) -0.0017(13)
C7A 0.038(2) 0.047(2) 0.036(2) 0.0096(16) -0.0068(16) -0.0173(18)
C8A 0.039(2) 0.061(3) 0.043(2) 0.016(2) 0.0009(18) -0.023(2)
C9A 0.034(2) 0.047(2) 0.032(2) 0.0152(16) 0.0050(15) -0.0050(17)
C10A 0.0287(17) 0.0365(18) 0.0227(18) 0.0051(13) 0.0034(14) 0.0003(14)
C11A 0.0265(17) 0.0183(14) 0.041(2) -0.0016(13) -0.0037(13) 0.0000(12)
C12A 0.0304(17) 0.0268(16) 0.0252(17) -0.0017(13) 0.0058(13) 0.0063(13)
C13A 0.0326(18) 0.0306(17) 0.0286(18) -0.0043(13) -0.0059(14) 0.0111(14)
C14A 0.0352(18) 0.0305(17) 0.0181(16) -0.0001(12) -0.0017(13) 0.0000(14)
C15A 0.0321(18) 0.0295(17) 0.0234(18) -0.0071(13) -0.0012(13) 0.0057(14)
C16A 0.0307(18) 0.0314(17) 0.0273(18) -0.0042(13) -0.0011(14) -0.0070(14)
C17A 0.047(2) 0.0261(16) 0.0320(18) -0.0010(15) -0.0008(17) -0.0059(15)
C18A 0.0291(18) 0.0318(17) 0.0279(18) -0.0009(13) 0.0066(14) -0.0046(14)
C19A 0.052(2) 0.0334(18) 0.0236(18) 0.0085(14) 0.0051(16) -0.0045(16)
C20A 0.052(2) 0.0313(18) 0.035(2) -0.0035(15) -0.0062(17) 0.0183(17)
C21A 0.0336(19) 0.0333(18) 0.0303(19) -0.0003(14) -0.0056(14) 0.0087(15)
C22A 0.033(2) 0.051(2) 0.034(2) 0.0101(17) 0.0089(16) 0.0184(17)
Co1B 0.01842(18) 0.01679(18) 0.01481(19) 0.00156(15) -0.00166(15) -0.00119(14)
Si1B 0.0289(5) 0.0186(4) 0.0179(4) -0.0024(3) -0.0062(3) 0.0050(3)
Si2B 0.0295(5) 0.0213(4) 0.0184(4) -0.0033(3) -0.0085(3) 0.0028(3)
Si3B 0.0186(4) 0.0178(4) 0.0152(4) 0.0009(3) 0.0004(3) -0.0009(3)
Si4B 0.0202(4) 0.0205(4) 0.0171(4) 0.0019(3) 0.0010(3) 0.0023(3)
N1B 0.0223(13) 0.0204(12) 0.0203(13) 0.0013(10) -0.0027(11) -0.0022(10)
N2B 0.0207(13) 0.0224(12) 0.0213(13) 0.0019(10) 0.0028(10) -0.0001(10)
N3B 0.0216(13) 0.0189(12) 0.0160(12) -0.0010(9) -0.0029(10) -0.0001(10)
N4B 0.0203(12) 0.0179(12) 0.0163(12) 0.0015(9) 0.0004(9) -0.0001(10)
C1B 0.0276(17) 0.0280(16) 0.0202(16) 0.0010(12) -0.0012(13) -0.0047(13)
C2B 0.042(2) 0.0356(18) 0.0188(18) 0.0006(13) -0.0067(14) -0.0063(15)
C3B 0.043(2) 0.0390(19) 0.028(2) -0.0013(15) -0.0157(16) -0.0118(17)
C4B 0.0269(18) 0.0343(18) 0.0310(19) 0.0024(14) -0.0067(14) -0.0096(15)
C5B 0.0231(15) 0.0187(14) 0.0236(16) 0.0004(12) -0.0026(12) 0.0002(12)
C6B 0.0195(15) 0.0216(14) 0.0255(17) 0.0030(12) -0.0005(12) -0.0008(11)
C7B 0.0231(16) 0.0334(18) 0.0341(19) 0.0047(14) -0.0005(14) -0.0044(14)
C8B 0.0302(18) 0.0377(19) 0.041(2) 0.0099(16) 0.0105(16) -0.0081(15)
C9B 0.0341(19) 0.0382(19) 0.0270(18) 0.0076(15) 0.0076(15) -0.0005(15)
C10B 0.0286(17) 0.0278(16) 0.0206(16) 0.0003(13) 0.0029(13) 0.0002(13)
C11B 0.049(2) 0.0209(17) 0.065(3) -0.0010(17) 0.001(2) -0.0025(17)
C12B 0.091(4) 0.035(2) 0.025(2) -0.0079(16) -0.010(2) 0.030(2)
C13B 0.041(2) 0.036(2) 0.051(3) -0.0153(18) -0.0182(18) 0.0176(17)
C14B 0.031(2) 0.050(2) 0.056(3) -0.021(2) -0.0131(19) 0.0013(17)
C15B 0.084(3) 0.0326(19) 0.0189(18) 0.0007(14) -0.013(2) 0.007(2)
C16B 0.0386(19) 0.0235(15) 0.0251(17) -0.0072(12) -0.0070(14) 0.0034(14)
C17B 0.0245(16) 0.0248(15) 0.0257(17) 0.0012(12) 0.0027(13) 0.0028(12)
C18B 0.0256(16) 0.0272(16) 0.0255(17) -0.0012(13) -0.0018(13) -0.0056(13)
C19B 0.0277(16) 0.0254(15) 0.0181(15) 0.0017(12) 0.0001(12) -0.0011(13)
C20B 0.0349(18) 0.0221(15) 0.0313(18) 0.0030(13) 0.0064(14) 0.0067(13)
C21B 0.0276(17) 0.0402(19) 0.034(2) -0.0039(15) -0.0073(15) 0.0061(15)
C22B 0.0291(18) 0.0295(17) 0.0235(17) 0.0037(13) 0.0064(13) 0.0065(13)

_geom_special_details            
;
 All esds (except the esd in the dihedral angle between two l.s. planes)
 are estimated using the full covariance matrix.  The cell esds are taken
 into account individually in the estimation of esds in distances, angles
 and torsion angles; correlations between esds in cell parameters are only
 used when they are defined by crystal symmetry.  An approximate (isotropic)
 treatment of cell esds is used for estimating esds involving l.s. planes.
;
loop_
_geom_bond_atom_site_label_1
_geom_bond_atom_site_label_2
_geom_bond_distance
_geom_bond_site_symmetry_2
_geom_bond_publ_flag
Co1A N1A 2.121(3) . ?
Co1A N2A 2.099(3) . ?
Co1A N3A 1.960(3) . ?
Co1A N4A 1.959(3) . ?
Si1A N3A 1.706(3) . ?
Si1A C11A 1.887(3) . ?
Si1A C12A 1.878(3) . ?
Si1A C13A 1.878(3) . ?
Si2A N3A 1.707(3) . ?
Si2A C14A 1.884(3) . ?
Si2A C15A 1.878(3) . ?
Si2A C16A 1.884(3) . ?
Si3A N4A 1.713(3) . ?
Si3A C17A 1.886(4) . ?
Si3A C18A 1.877(4) . ?
Si3A C19A 1.884(4) . ?
Si4A N4A 1.707(3) . ?
Si4A C20A 1.889(4) . ?
Si4A C21A 1.878(4) . ?
Si4A C22A 1.882(4) . ?
N1A C1A 1.334(4) . ?
N1A C5A 1.350(4) . ?
N2A C6A 1.347(4) . ?
N2A C10A 1.338(4) . ?
C1A H1A 0.9500 . ?
C1A C2A 1.381(5) . ?
C2A H2A 0.9500 . ?
C2A C3A 1.380(5) . ?
C3A H3A 0.9500 . ?
C3A C4A 1.385(5) . ?
C4A H4A 0.9500 . ?
C4A C5A 1.399(5) . ?
C5A C6A 1.478(5) . ?
C6A C7A 1.391(5) . ?
C7A H7A 0.9500 . ?
C7A C8A 1.375(6) . ?
C8A H8A 0.9500 . ?
C8A C9A 1.385(6) . ?
C9A H9A 0.9500 . ?
C9A C10A 1.383(5) . ?
C10A H10A 0.9500 . ?
C11A H11A 0.9800 . ?
C11A H11B 0.9800 . ?
C11A H11C 0.9800 . ?
C12A H12A 0.9800 . ?
C12A H12B 0.9800 . ?
C12A H12C 0.9800 . ?
C13A H13A 0.9800 . ?
C13A H13B 0.9800 . ?
C13A H13C 0.9800 . ?
C14A H14A 0.9800 . ?
C14A H14B 0.9800 . ?
C14A H14C 0.9800 . ?
C15A H15A 0.9800 . ?
C15A H15B 0.9800 . ?
C15A H15C 0.9800 . ?
C16A H16A 0.9800 . ?
C16A H16B 0.9800 . ?
C16A H16C 0.9800 . ?
C17A H17A 0.9800 . ?
C17A H17B 0.9800 . ?
C17A H17C 0.9800 . ?
C18A H18A 0.9800 . ?
C18A H18B 0.9800 . ?
C18A H18C 0.9800 . ?
C19A H19A 0.9800 . ?
C19A H19B 0.9800 . ?
C19A H19C 0.9800 . ?
C20A H20A 0.9800 . ?
C20A H20B 0.9800 . ?
C20A H20C 0.9800 . ?
C21A H21A 0.9800 . ?
C21A H21B 0.9800 . ?
C21A H21C 0.9800 . ?
C22A H22A 0.9800 . ?
C22A H22B 0.9800 . ?
C22A H22C 0.9800 . ?
Co1B N1B 2.103(3) . ?
Co1B N2B 2.108(3) . ?
Co1B N3B 1.955(3) . ?
Co1B N4B 1.959(2) . ?
Si1B N3B 1.708(3) . ?
Si1B C11B 1.881(4) . ?
Si1B C12B 1.873(4) . ?
Si1B C13B 1.877(4) . ?
Si2B N3B 1.707(3) . ?
Si2B C14B 1.880(4) . ?
Si2B C15B 1.882(4) . ?
Si2B C16B 1.879(3) . ?
Si3B N4B 1.708(3) . ?
Si3B C17B 1.876(3) . ?
Si3B C18B 1.886(3) . ?
Si3B C19B 1.885(3) . ?
Si4B N4B 1.710(3) . ?
Si4B C20B 1.882(3) . ?
Si4B C21B 1.885(4) . ?
Si4B C22B 1.873(3) . ?
N1B C1B 1.341(4) . ?
N1B C5B 1.346(4) . ?
N2B C6B 1.356(4) . ?
N2B C10B 1.337(4) . ?
C1B H1B 0.9500 . ?
C1B C2B 1.385(5) . ?
C2B H2B 0.9500 . ?
C2B C3B 1.378(6) . ?
C3B H3B 0.9500 . ?
C3B C4B 1.382(6) . ?
C4B H4B 0.96(4) . ?
C4B C5B 1.393(5) . ?
C5B C6B 1.480(5) . ?
C6B C7B 1.389(5) . ?
C7B H7B 0.9500 . ?
C7B C8B 1.381(6) . ?
C8B H8B 0.9500 . ?
C8B C9B 1.387(6) . ?
C9B H9B 0.9500 . ?
C9B C10B 1.381(5) . ?
C10B H10B 0.9500 . ?
C11B H11D 0.9800 . ?
C11B H11E 0.9800 . ?
C11B H11F 0.9800 . ?
C12B H12D 0.9800 . ?
C12B H12E 0.9800 . ?
C12B H12F 0.9800 . ?
C13B H13D 0.9800 . ?
C13B H13E 0.9800 . ?
C13B H13F 0.9800 . ?
C14B H14D 0.9800 . ?
C14B H14E 0.9800 . ?
C14B H14F 0.9800 . ?
C15B H15D 0.9800 . ?
C15B H15E 0.9800 . ?
C15B H15F 0.9800 . ?
C16B H16D 0.9800 . ?
C16B H16E 0.9800 . ?
C16B H16F 0.9800 . ?
C17B H17D 0.9800 . ?
C17B H17E 0.9800 . ?
C17B H17F 0.9800 . ?
C18B H18D 0.9800 . ?
C18B H18E 0.9800 . ?
C18B H18F 0.9800 . ?
C19B H19D 0.9800 . ?
C19B H19E 0.9800 . ?
C19B H19F 0.9800 . ?
C20B H20D 0.9800 . ?
C20B H20E 0.9800 . ?
C20B H20F 0.9800 . ?
C21B H21D 0.9800 . ?
C21B H21E 0.9800 . ?
C21B H21F 0.9800 . ?
C22B H22D 0.9800 . ?
C22B H22E 0.9800 . ?
C22B H22F 0.9800 . ?

loop_
_geom_angle_atom_site_label_1
_geom_angle_atom_site_label_2
_geom_angle_atom_site_label_3
_geom_angle
_geom_angle_site_symmetry_1
_geom_angle_site_symmetry_3
_geom_angle_publ_flag
N2A Co1A N1A 77.48(11) . . ?
N3A Co1A N1A 123.67(10) . . ?
N3A Co1A N2A 102.08(11) . . ?
N4A Co1A N1A 100.87(11) . . ?
N4A Co1A N2A 122.00(11) . . ?
N4A Co1A N3A 123.26(11) . . ?
N3A Si1A C11A 112.13(14) . . ?
N3A Si1A C12A 113.30(14) . . ?
N3A Si1A C13A 115.11(14) . . ?
C12A Si1A C11A 105.92(16) . . ?
C13A Si1A C11A 104.44(16) . . ?
C13A Si1A C12A 105.07(16) . . ?
N3A Si2A C14A 114.05(14) . . ?
N3A Si2A C15A 111.94(14) . . ?
N3A Si2A C16A 113.47(15) . . ?
C15A Si2A C14A 104.95(16) . . ?
C15A Si2A C16A 105.60(16) . . ?
C16A Si2A C14A 106.08(16) . . ?
N4A Si3A C17A 112.95(16) . . ?
N4A Si3A C18A 113.04(14) . . ?
N4A Si3A C19A 112.28(16) . . ?
C18A Si3A C17A 105.47(17) . . ?
C18A Si3A C19A 105.32(18) . . ?
C19A Si3A C17A 107.18(17) . . ?
N4A Si4A C20A 113.12(17) . . ?
N4A Si4A C21A 112.27(15) . . ?
N4A Si4A C22A 112.79(15) . . ?
C21A Si4A C20A 107.92(17) . . ?
C21A Si4A C22A 105.96(19) . . ?
C22A Si4A C20A 104.18(19) . . ?
C1A N1A Co1A 125.2(2) . . ?
C1A N1A C5A 118.7(3) . . ?
C5A N1A Co1A 114.6(2) . . ?
C6A N2A Co1A 116.1(2) . . ?
C10A N2A Co1A 124.9(2) . . ?
C10A N2A C6A 118.8(3) . . ?
Si1A N3A Co1A 113.85(14) . . ?
Si1A N3A Si2A 127.57(16) . . ?
Si2A N3A Co1A 118.58(14) . . ?
Si3A N4A Co1A 119.32(15) . . ?
Si4A N4A Co1A 117.10(15) . . ?
Si4A N4A Si3A 122.20(16) . . ?
N1A C1A H1A 118.6 . . ?
N1A C1A C2A 122.9(3) . . ?
C2A C1A H1A 118.6 . . ?
C1A C2A H2A 120.6 . . ?
C3A C2A C1A 118.8(3) . . ?
C3A C2A H2A 120.6 . . ?
C2A C3A H3A 120.4 . . ?
C2A C3A C4A 119.3(3) . . ?
C4A C3A H3A 120.4 . . ?
C3A C4A H4A 120.7 . . ?
C3A C4A C5A 118.7(3) . . ?
C5A C4A H4A 120.7 . . ?
N1A C5A C4A 121.7(3) . . ?
N1A C5A C6A 115.5(3) . . ?
C4A C5A C6A 122.8(3) . . ?
N2A C6A C5A 115.2(3) . . ?
N2A C6A C7A 121.1(3) . . ?
C7A C6A C5A 123.6(3) . . ?
C6A C7A H7A 120.2 . . ?
C8A C7A C6A 119.5(4) . . ?
C8A C7A H7A 120.2 . . ?
C7A C8A H8A 120.3 . . ?
C7A C8A C9A 119.4(4) . . ?
C9A C8A H8A 120.3 . . ?
C8A C9A H9A 120.9 . . ?
C10A C9A C8A 118.2(4) . . ?
C10A C9A H9A 120.9 . . ?
N2A C10A C9A 122.9(3) . . ?
N2A C10A H10A 118.6 . . ?
C9A C10A H10A 118.6 . . ?
Si1A C11A H11A 109.5 . . ?
Si1A C11A H11B 109.5 . . ?
Si1A C11A H11C 109.5 . . ?
H11A C11A H11B 109.5 . . ?
H11A C11A H11C 109.5 . . ?
H11B C11A H11C 109.5 . . ?
Si1A C12A H12A 109.5 . . ?
Si1A C12A H12B 109.5 . . ?
Si1A C12A H12C 109.5 . . ?
H12A C12A H12B 109.5 . . ?
H12A C12A H12C 109.5 . . ?
H12B C12A H12C 109.5 . . ?
Si1A C13A H13A 109.5 . . ?
Si1A C13A H13B 109.5 . . ?
Si1A C13A H13C 109.5 . . ?
H13A C13A H13B 109.5 . . ?
H13A C13A H13C 109.5 . . ?
H13B C13A H13C 109.5 . . ?
Si2A C14A H14A 109.5 . . ?
Si2A C14A H14B 109.5 . . ?
Si2A C14A H14C 109.5 . . ?
H14A C14A H14B 109.5 . . ?
H14A C14A H14C 109.5 . . ?
H14B C14A H14C 109.5 . . ?
Si2A C15A H15A 109.5 . . ?
Si2A C15A H15B 109.5 . . ?
Si2A C15A H15C 109.5 . . ?
H15A C15A H15B 109.5 . . ?
H15A C15A H15C 109.5 . . ?
H15B C15A H15C 109.5 . . ?
Si2A C16A H16A 109.5 . . ?
Si2A C16A H16B 109.5 . . ?
Si2A C16A H16C 109.5 . . ?
H16A C16A H16B 109.5 . . ?
H16A C16A H16C 109.5 . . ?
H16B C16A H16C 109.5 . . ?
Si3A C17A H17A 109.5 . . ?
Si3A C17A H17B 109.5 . . ?
Si3A C17A H17C 109.5 . . ?
H17A C17A H17B 109.5 . . ?
H17A C17A H17C 109.5 . . ?
H17B C17A H17C 109.5 . . ?
Si3A C18A H18A 109.5 . . ?
Si3A C18A H18B 109.5 . . ?
Si3A C18A H18C 109.5 . . ?
H18A C18A H18B 109.5 . . ?
H18A C18A H18C 109.5 . . ?
H18B C18A H18C 109.5 . . ?
Si3A C19A H19A 109.5 . . ?
Si3A C19A H19B 109.5 . . ?
Si3A C19A H19C 109.5 . . ?
H19A C19A H19B 109.5 . . ?
H19A C19A H19C 109.5 . . ?
H19B C19A H19C 109.5 . . ?
Si4A C20A H20A 109.5 . . ?
Si4A C20A H20B 109.5 . . ?
Si4A C20A H20C 109.5 . . ?
H20A C20A H20B 109.5 . . ?
H20A C20A H20C 109.5 . . ?
H20B C20A H20C 109.5 . . ?
Si4A C21A H21A 109.5 . . ?
Si4A C21A H21B 109.5 . . ?
Si4A C21A H21C 109.5 . . ?
H21A C21A H21B 109.5 . . ?
H21A C21A H21C 109.5 . . ?
H21B C21A H21C 109.5 . . ?
Si4A C22A H22A 109.5 . . ?
Si4A C22A H22B 109.5 . . ?
Si4A C22A H22C 109.5 . . ?
H22A C22A H22B 109.5 . . ?
H22A C22A H22C 109.5 . . ?
H22B C22A H22C 109.5 . . ?
N1B Co1B N2B 77.63(11) . . ?
N3B Co1B N1B 120.41(10) . . ?
N3B Co1B N2B 99.36(11) . . ?
N3B Co1B N4B 124.53(11) . . ?
N4B Co1B N1B 102.45(10) . . ?
N4B Co1B N2B 124.39(10) . . ?
N3B Si1B C11B 112.04(16) . . ?
N3B Si1B C12B 114.08(16) . . ?
N3B Si1B C13B 113.10(15) . . ?
C12B Si1B C11B 105.2(2) . . ?
C12B Si1B C13B 105.6(2) . . ?
C13B Si1B C11B 106.2(2) . . ?
N3B Si2B C14B 113.26(17) . . ?
N3B Si2B C15B 112.92(16) . . ?
N3B Si2B C16B 112.34(14) . . ?
C14B Si2B C15B 107.3(2) . . ?
C16B Si2B C14B 104.68(18) . . ?
C16B Si2B C15B 105.70(18) . . ?
N4B Si3B C17B 112.06(14) . . ?
N4B Si3B C18B 113.47(14) . . ?
N4B Si3B C19B 112.20(14) . . ?
C17B Si3B C18B 105.12(15) . . ?
C17B Si3B C19B 106.01(15) . . ?
C19B Si3B C18B 107.44(15) . . ?
N4B Si4B C20B 113.89(14) . . ?
N4B Si4B C21B 111.78(15) . . ?
N4B Si4B C22B 112.26(14) . . ?
C20B Si4B C21B 107.65(17) . . ?
C22B Si4B C20B 104.02(16) . . ?
C22B Si4B C21B 106.69(18) . . ?
C1B N1B Co1B 124.9(2) . . ?
C1B N1B C5B 118.9(3) . . ?
C5B N1B Co1B 115.6(2) . . ?
C6B N2B Co1B 115.1(2) . . ?
C10B N2B Co1B 124.0(2) . . ?
C10B N2B C6B 118.4(3) . . ?
Si1B N3B Co1B 118.26(14) . . ?
Si2B N3B Co1B 117.50(14) . . ?
Si2B N3B Si1B 123.00(15) . . ?
Si3B N4B Co1B 117.81(14) . . ?
Si3B N4B Si4B 123.97(15) . . ?
Si4B N4B Co1B 116.93(14) . . ?
N1B C1B H1B 118.7 . . ?
N1B C1B C2B 122.6(3) . . ?
C2B C1B H1B 118.7 . . ?
C1B C2B H2B 120.8 . . ?
C3B C2B C1B 118.4(3) . . ?
C3B C2B H2B 120.8 . . ?
C2B C3B H3B 120.1 . . ?
C2B C3B C4B 119.7(3) . . ?
C4B C3B H3B 120.1 . . ?
C3B C4B H4B 119(3) . . ?
C3B C4B C5B 118.8(3) . . ?
C5B C4B H4B 122(3) . . ?
N1B C5B C4B 121.5(3) . . ?
N1B C5B C6B 115.3(3) . . ?
C4B C5B C6B 123.1(3) . . ?
N2B C6B C5B 114.7(3) . . ?
N2B C6B C7B 121.7(3) . . ?
C7B C6B C5B 123.5(3) . . ?
C6B C7B H7B 120.4 . . ?
C8B C7B C6B 119.1(3) . . ?
C8B C7B H7B 120.4 . . ?
C7B C8B H8B 120.4 . . ?
C7B C8B C9B 119.3(3) . . ?
C9B C8B H8B 120.4 . . ?
C8B C9B H9B 120.7 . . ?
C10B C9B C8B 118.5(3) . . ?
C10B C9B H9B 120.7 . . ?
N2B C10B C9B 123.0(3) . . ?
N2B C10B H10B 118.5 . . ?
C9B C10B H10B 118.5 . . ?
Si1B C11B H11D 109.5 . . ?
Si1B C11B H11E 109.5 . . ?
Si1B C11B H11F 109.5 . . ?
H11D C11B H11E 109.5 . . ?
H11D C11B H11F 109.5 . . ?
H11E C11B H11F 109.5 . . ?
Si1B C12B H12D 109.5 . . ?
Si1B C12B H12E 109.5 . . ?
Si1B C12B H12F 109.5 . . ?
H12D C12B H12E 109.5 . . ?
H12D C12B H12F 109.5 . . ?
H12E C12B H12F 109.5 . . ?
Si1B C13B H13D 109.5 . . ?
Si1B C13B H13E 109.5 . . ?
Si1B C13B H13F 109.5 . . ?
H13D C13B H13E 109.5 . . ?
H13D C13B H13F 109.5 . . ?
H13E C13B H13F 109.5 . . ?
Si2B C14B H14D 109.5 . . ?
Si2B C14B H14E 109.5 . . ?
Si2B C14B H14F 109.5 . . ?
H14D C14B H14E 109.5 . . ?
H14D C14B H14F 109.5 . . ?
H14E C14B H14F 109.5 . . ?
Si2B C15B H15D 109.5 . . ?
Si2B C15B H15E 109.5 . . ?
Si2B C15B H15F 109.5 . . ?
H15D C15B H15E 109.5 . . ?
H15D C15B H15F 109.5 . . ?
H15E C15B H15F 109.5 . . ?
Si2B C16B H16D 109.5 . . ?
Si2B C16B H16E 109.5 . . ?
Si2B C16B H16F 109.5 . . ?
H16D C16B H16E 109.5 . . ?
H16D C16B H16F 109.5 . . ?
H16E C16B H16F 109.5 . . ?
Si3B C17B H17D 109.5 . . ?
Si3B C17B H17E 109.5 . . ?
Si3B C17B H17F 109.5 . . ?
H17D C17B H17E 109.5 . . ?
H17D C17B H17F 109.5 . . ?
H17E C17B H17F 109.5 . . ?
Si3B C18B H18D 109.5 . . ?
Si3B C18B H18E 109.5 . . ?
Si3B C18B H18F 109.5 . . ?
H18D C18B H18E 109.5 . . ?
H18D C18B H18F 109.5 . . ?
H18E C18B H18F 109.5 . . ?
Si3B C19B H19D 109.5 . . ?
Si3B C19B H19E 109.5 . . ?
Si3B C19B H19F 109.5 . . ?
H19D C19B H19E 109.5 . . ?
H19D C19B H19F 109.5 . . ?
H19E C19B H19F 109.5 . . ?
Si4B C20B H20D 109.5 . . ?
Si4B C20B H20E 109.5 . . ?
Si4B C20B H20F 109.5 . . ?
H20D C20B H20E 109.5 . . ?
H20D C20B H20F 109.5 . . ?
H20E C20B H20F 109.5 . . ?
Si4B C21B H21D 109.5 . . ?
Si4B C21B H21E 109.5 . . ?
Si4B C21B H21F 109.5 . . ?
H21D C21B H21E 109.5 . . ?
H21D C21B H21F 109.5 . . ?
H21E C21B H21F 109.5 . . ?
Si4B C22B H22D 109.5 . . ?
Si4B C22B H22E 109.5 . . ?
Si4B C22B H22F 109.5 . . ?
H22D C22B H22E 109.5 . . ?
H22D C22B H22F 109.5 . . ?
H22E C22B H22F 109.5 . . ?

_shelx_res_file                  
;
TITL pimx003_pca21_2604_a.res in Pca2(1)
    co4.res
    created by SHELXL-2018/3 at 15:48:29 on 23-May-2019
REM Old TITL PIMX003_Pca21_2604 in Pca2(1)
REM SHELXT solution in Pca2(1)
REM R1 0.063, Rweak 0.018, Alpha 0.006, Orientation as input
REM Flack x = 0.493 ( 0.007 ) from Parsons' quotients
REM Formula found by SHELXT: C44 N8 Si8 Co2
CELL 0.71073 18.7674 18.103 17.593 90 90 90
ZERR 8 0.0009 0.0008 0.0007 0 0 0
LATT -1
SYMM -X,-Y,0.5+Z
SYMM 0.5+X,-Y,+Z
SYMM 0.5-X,+Y,0.5+Z
SFAC C H Co N Si
UNIT 176 352 8 32 32

L.S. 5
PLAN  20
SIZE 0.2 0.2 0.31
TEMP -173.15
BOND $H
list 4
fmap 2
acta
TWIN -1 0 0 0 -1 0 0 0 -1 2
OMIT 0 52
REM <olex2.extras>
REM <HklSrc "%.\\PIMX003.hkl">
REM </olex2.extras>

WGHT    0.051400
BASF   0.49486
FVAR       0.39564
CO1A  3    0.604025    0.956669    0.608548    11.00000    0.01906    0.01800 =
         0.01588    0.00164   -0.00098    0.00072
SI1A  5    0.716915    0.839781    0.648454    11.00000    0.01963    0.01742 =
         0.01751   -0.00086   -0.00147    0.00151
SI2A  5    0.694977    0.968504    0.758945    11.00000    0.02116    0.02001 =
         0.01548   -0.00121   -0.00077    0.00058
SI3A  5    0.666166    1.107816    0.546106    11.00000    0.03407    0.01903 =
         0.01931    0.00204    0.00278   -0.00268
SI4A  5    0.509566    1.095522    0.575779    11.00000    0.03010    0.02514 =
         0.02004    0.00241    0.00035    0.00967
N1A   4    0.577932    0.905319    0.503791    11.00000    0.02187    0.02071 =
         0.02032   -0.00084   -0.00156    0.00171
N2A   4    0.515923    0.891133    0.637757    11.00000    0.02064    0.02639 =
         0.02169    0.00199    0.00094    0.00133
N3A   4    0.677564    0.919752    0.677979    11.00000    0.02208    0.02022 =
         0.01500    0.00024   -0.00093    0.00205
N4A   4    0.594044    1.061069    0.581349    11.00000    0.02801    0.01955 =
         0.01836    0.00312   -0.00022    0.00270
C1A   1    0.608577    0.920123    0.437110    11.00000    0.02583    0.02902 =
         0.02197    0.00053    0.00191    0.00150
AFIX  43
H1A   2    0.651750    0.947520    0.436772    11.00000   -1.20000
AFIX   0
C2A   1    0.580287    0.897364    0.368537    11.00000    0.03470    0.03384 =
         0.02062   -0.00201    0.00062    0.00509
AFIX  43
H2A   2    0.603794    0.908557    0.322121    11.00000   -1.20000
AFIX   0
C3A   1    0.517251    0.858063    0.368617    11.00000    0.04038    0.03107 =
         0.02386   -0.00538   -0.00861    0.00466
AFIX  43
H3A   2    0.496771    0.841816    0.322151    11.00000   -1.20000
AFIX   0
C4A   1    0.484199    0.842578    0.437151    11.00000    0.02935    0.02924 =
         0.02802   -0.00105   -0.00636   -0.00176
AFIX  43
H4A   2    0.440659    0.815843    0.438486    11.00000   -1.20000
AFIX   0
C5A   1    0.516197    0.867087    0.504377    11.00000    0.02365    0.02054 =
         0.02533    0.00033   -0.00480    0.00210
C6A   1    0.484680    0.854244    0.580240    11.00000    0.02433    0.02498 =
         0.02762    0.00710   -0.00424   -0.00170
C7A   1    0.427548    0.806978    0.593268    11.00000    0.03847    0.04683 =
         0.03564    0.00957   -0.00679   -0.01728
AFIX  43
H7A   2    0.405968    0.781355    0.552149    11.00000   -1.20000
AFIX   0
C8A   1    0.402533    0.797604    0.666061    11.00000    0.03918    0.06114 =
         0.04311    0.01613    0.00093   -0.02322
AFIX  43
H8A   2    0.362417    0.766928    0.675452    11.00000   -1.20000
AFIX   0
C9A   1    0.436380    0.833314    0.725582    11.00000    0.03447    0.04749 =
         0.03200    0.01516    0.00496   -0.00496
AFIX  43
H9A   2    0.421062    0.826442    0.776561    11.00000   -1.20000
AFIX   0
C10A  1    0.493102    0.879260    0.708745    11.00000    0.02868    0.03647 =
         0.02270    0.00508    0.00336    0.00026
AFIX  43
H10A  2    0.516904    0.903453    0.749383    11.00000   -1.20000
AFIX   0
C11A  1    0.649837    0.763824    0.631813    11.00000    0.02653    0.01825 =
         0.04072   -0.00162   -0.00370    0.00003
AFIX 137
H11A  2    0.620278    0.757703    0.677298    11.00000   -1.50000
H11B  2    0.674900    0.717508    0.621008    11.00000   -1.50000
H11C  2    0.619501    0.776817    0.588489    11.00000   -1.50000
AFIX   0
C12A  1    0.767279    0.850013    0.556793    11.00000    0.03035    0.02680 =
         0.02522   -0.00171    0.00582    0.00635
AFIX 137
H12A  2    0.734179    0.863742    0.516092    11.00000   -1.50000
H12B  2    0.790380    0.803067    0.544060    11.00000   -1.50000
H12C  2    0.803555    0.888568    0.562404    11.00000   -1.50000
AFIX   0
C13A  1    0.782605    0.798743    0.717008    11.00000    0.03256    0.03061 =
         0.02863   -0.00425   -0.00591    0.01113
AFIX 137
H13A  2    0.806264    0.756362    0.693257    11.00000   -1.50000
H13B  2    0.757549    0.782460    0.762919    11.00000   -1.50000
H13C  2    0.818282    0.835991    0.730625    11.00000   -1.50000
AFIX   0
C14A  1    0.701674    0.909755    0.847068    11.00000    0.03518    0.03048 =
         0.01813   -0.00013   -0.00168    0.00003
AFIX 137
H14A  2    0.661100    0.875738    0.849132    11.00000   -1.50000
H14B  2    0.701267    0.941575    0.892131    11.00000   -1.50000
H14C  2    0.746138    0.881399    0.845774    11.00000   -1.50000
AFIX   0
C15A  1    0.623006    1.037477    0.780387    11.00000    0.03211    0.02954 =
         0.02342   -0.00711   -0.00119    0.00572
AFIX 137
H15A  2    0.578618    1.011370    0.792186    11.00000   -1.50000
H15B  2    0.615666    1.069392    0.736079    11.00000   -1.50000
H15C  2    0.637169    1.067667    0.824086    11.00000   -1.50000
AFIX   0
C16A  1    0.780165    1.023334    0.754243    11.00000    0.03072    0.03139 =
         0.02725   -0.00417   -0.00114   -0.00698
AFIX 137
H16A  2    0.790867    1.043781    0.804541    11.00000   -1.50000
H16B  2    0.774708    1.063725    0.717615    11.00000   -1.50000
H16C  2    0.819242    0.991021    0.738126    11.00000   -1.50000
AFIX   0
C17A  1    0.693681    1.188216    0.607633    11.00000    0.04749    0.02606 =
         0.03204   -0.00097   -0.00079   -0.00586
AFIX 137
H17A  2    0.656169    1.225870    0.606976    11.00000   -1.50000
H17B  2    0.738052    1.209457    0.588015    11.00000   -1.50000
H17C  2    0.701120    1.171100    0.659881    11.00000   -1.50000
AFIX   0
C18A  1    0.747712    1.048406    0.537235    11.00000    0.02908    0.03176 =
         0.02786   -0.00091    0.00656   -0.00457
AFIX 137
H18A  2    0.755561    1.021756    0.584993    11.00000   -1.50000
H18B  2    0.789142    1.079580    0.526248    11.00000   -1.50000
H18C  2    0.741008    1.012863    0.495832    11.00000   -1.50000
AFIX   0
C19A  1    0.649558    1.145174    0.447749    11.00000    0.05152    0.03341 =
         0.02365    0.00852    0.00515   -0.00449
AFIX 137
H19A  2    0.614076    1.184814    0.450295    11.00000   -1.50000
H19B  2    0.631821    1.105455    0.414970    11.00000   -1.50000
H19C  2    0.694138    1.164687    0.426817    11.00000   -1.50000
AFIX   0
C20A  1    0.505533    1.199026    0.588852    11.00000    0.05222    0.03126 =
         0.03488   -0.00347   -0.00615    0.01829
AFIX 137
H20A  2    0.455827    1.215436    0.586364    11.00000   -1.50000
H20B  2    0.533012    1.223181    0.548530    11.00000   -1.50000
H20C  2    0.525669    1.212148    0.638442    11.00000   -1.50000
AFIX   0
C21A  1    0.465415    1.072565    0.482957    11.00000    0.03357    0.03325 =
         0.03034   -0.00026   -0.00564    0.00873
AFIX 137
H21A  2    0.418876    1.096990    0.480401    11.00000   -1.50000
H21B  2    0.458960    1.018974    0.479134    11.00000   -1.50000
H21C  2    0.495367    1.089750    0.440893    11.00000   -1.50000
AFIX   0
C22A  1    0.449192    1.058216    0.652043    11.00000    0.03263    0.05084 =
         0.03383    0.01012    0.00887    0.01841
AFIX 137
H22A  2    0.407239    1.090115    0.656809    11.00000   -1.50000
H22B  2    0.474836    1.056996    0.700551    11.00000   -1.50000
H22C  2    0.434055    1.008108    0.638492    11.00000   -1.50000
AFIX   0

CO1B  3    0.380694    0.519720    0.368763    11.00000    0.01842    0.01679 =
         0.01481    0.00156   -0.00166   -0.00119
SI1B  5    0.287568    0.662571    0.345793    11.00000    0.02890    0.01859 =
         0.01789   -0.00243   -0.00621    0.00505
SI2B  5    0.266425    0.534521    0.239798    11.00000    0.02949    0.02129 =
         0.01841   -0.00327   -0.00852    0.00281
SI3B  5    0.305951    0.388884    0.454973    11.00000    0.01859    0.01778 =
         0.01517    0.00086    0.00036   -0.00092
SI4B  5    0.450774    0.363630    0.385192    11.00000    0.02015    0.02048 =
         0.01713    0.00188    0.00099    0.00226
N1B   4    0.437506    0.568433    0.458813    11.00000    0.02227    0.02037 =
         0.02029    0.00130   -0.00267   -0.00223
N2B   4    0.468044    0.568223    0.312342    11.00000    0.02074    0.02240 =
         0.02130    0.00186    0.00278   -0.00012
N3B   4    0.303083    0.573259    0.319129    11.00000    0.02164    0.01886 =
         0.01604   -0.00099   -0.00294   -0.00014
N4B   4    0.376085    0.415848    0.399696    11.00000    0.02034    0.01793 =
         0.01635    0.00151    0.00044   -0.00013
C1B   1    0.422685    0.558975    0.532726    11.00000    0.02755    0.02800 =
         0.02017    0.00103   -0.00125   -0.00473
AFIX  43
H1B   2    0.379898    0.534257    0.546351    11.00000   -1.20000
AFIX   0
C2B   1    0.467278    0.583811    0.589987    11.00000    0.04163    0.03563 =
         0.01878    0.00061   -0.00671   -0.00630
AFIX  43
H2B   2    0.455344    0.576475    0.641918    11.00000   -1.20000
AFIX   0
C3B   1    0.529357    0.619411    0.569876    11.00000    0.04330    0.03900 =
         0.02812   -0.00135   -0.01575   -0.01179
AFIX  43
H3B   2    0.560767    0.637237    0.608044    11.00000   -1.20000
AFIX   0
C4B   1    0.545742    0.629078    0.493959    11.00000    0.02691    0.03435 =
         0.03100    0.00241   -0.00674   -0.00957
H4B   2    0.590102    0.652162    0.480219    11.00000    0.03329
C5B   1    0.498349    0.602918    0.439285    11.00000    0.02311    0.01869 =
         0.02362    0.00043   -0.00261    0.00020
C6B   1    0.510617    0.610790    0.356565    11.00000    0.01952    0.02165 =
         0.02549    0.00299   -0.00048   -0.00075
C7B   1    0.558893    0.660392    0.325383    11.00000    0.02307    0.03341 =
         0.03413    0.00470   -0.00047   -0.00438
AFIX  43
H7B   2    0.589021    0.688953    0.357308    11.00000   -1.20000
AFIX   0
C8B   1    0.562521    0.667646    0.247333    11.00000    0.03015    0.03774 =
         0.04147    0.00991    0.01049   -0.00814
AFIX  43
H8B   2    0.594413    0.702107    0.224949    11.00000   -1.20000
AFIX   0
C9B   1    0.519087    0.624062    0.202010    11.00000    0.03411    0.03823 =
         0.02697    0.00758    0.00762   -0.00051
AFIX  43
H9B   2    0.521231    0.627503    0.148176    11.00000   -1.20000
AFIX   0
C10B  1    0.472650    0.575545    0.236858    11.00000    0.02861    0.02781 =
         0.02064    0.00033    0.00288    0.00019
AFIX  43
H10B  2    0.442599    0.546017    0.205792    11.00000   -1.20000
AFIX   0
C11B  1    0.357944    0.727297    0.308934    11.00000    0.04873    0.02088 =
         0.06485   -0.00104    0.00079   -0.00247
AFIX 137
H11D  2    0.403821    0.715341    0.332524    11.00000   -1.50000
H11E  2    0.344852    0.778279    0.321422    11.00000   -1.50000
H11F  2    0.361826    0.721997    0.253653    11.00000   -1.50000
AFIX   0
C12B  1    0.286343    0.677235    0.451149    11.00000    0.09093    0.03496 =
         0.02542   -0.00793   -0.00966    0.02976
AFIX 137
H12D  2    0.249477    0.645998    0.474023    11.00000   -1.50000
H12E  2    0.275994    0.729216    0.462110    11.00000   -1.50000
H12F  2    0.332916    0.664165    0.472451    11.00000   -1.50000
AFIX   0
C13B  1    0.200140    0.699256    0.310264    11.00000    0.04105    0.03625 =
         0.05063   -0.01529   -0.01824    0.01757
AFIX 137
H13D  2    0.194922    0.687436    0.256189    11.00000   -1.50000
H13E  2    0.198747    0.752960    0.317115    11.00000   -1.50000
H13F  2    0.161111    0.676523    0.338939    11.00000   -1.50000
AFIX   0
C14B  1    0.169061    0.512611    0.250729    11.00000    0.03062    0.04985 =
         0.05618   -0.02108   -0.01309    0.00129
AFIX 137
H14D  2    0.151750    0.488057    0.204647    11.00000   -1.50000
H14E  2    0.142342    0.558469    0.258724    11.00000   -1.50000
H14F  2    0.162328    0.479884    0.294516    11.00000   -1.50000
AFIX   0
C15B  1    0.276010    0.594333    0.152881    11.00000    0.08443    0.03260 =
         0.01890    0.00066   -0.01349    0.00683
AFIX 137
H15D  2    0.254235    0.642642    0.162491    11.00000   -1.50000
H15E  2    0.252119    0.570641    0.109763    11.00000   -1.50000
H15F  2    0.326664    0.600857    0.141135    11.00000   -1.50000
AFIX   0
C16B  1    0.309038    0.443808    0.214642    11.00000    0.03863    0.02353 =
         0.02513   -0.00716   -0.00703    0.00343
AFIX 137
H16D  2    0.359498    0.451722    0.202843    11.00000   -1.50000
H16E  2    0.284993    0.422643    0.170249    11.00000   -1.50000
H16F  2    0.304845    0.409757    0.257715    11.00000   -1.50000
AFIX   0
C17B  1    0.240318    0.465639    0.470171    11.00000    0.02453    0.02482 =
         0.02572    0.00125    0.00267    0.00279
AFIX 137
H17D  2    0.202279    0.448696    0.504117    11.00000   -1.50000
H17E  2    0.219766    0.480267    0.421225    11.00000   -1.50000
H17F  2    0.264624    0.508050    0.493109    11.00000   -1.50000
AFIX   0
C18B  1    0.252441    0.310965    0.412464    11.00000    0.02560    0.02724 =
         0.02551   -0.00118   -0.00183   -0.00557
AFIX 137
H18D  2    0.213242    0.298080    0.446794    11.00000   -1.50000
H18E  2    0.283250    0.267827    0.405225    11.00000   -1.50000
H18F  2    0.233029    0.326503    0.363287    11.00000   -1.50000
AFIX   0
C19B  1    0.335175    0.358696    0.552691    11.00000    0.02767    0.02545 =
         0.01813    0.00173    0.00007   -0.00110
AFIX 137
H19D  2    0.356108    0.400777    0.579696    11.00000   -1.50000
H19E  2    0.370710    0.319284    0.548070    11.00000   -1.50000
H19F  2    0.293895    0.340335    0.581097    11.00000   -1.50000
AFIX   0
C20B  1    0.434971    0.261233    0.392666    11.00000    0.03492    0.02209 =
         0.03135    0.00299    0.00645    0.00668
AFIX 137
H20D  2    0.403542    0.245277    0.351322    11.00000   -1.50000
H20E  2    0.412577    0.250005    0.441643    11.00000   -1.50000
H20F  2    0.480564    0.235094    0.388925    11.00000   -1.50000
AFIX   0
C21B  1    0.524007    0.388274    0.454008    11.00000    0.02760    0.04018 =
         0.03397   -0.00386   -0.00726    0.00615
AFIX 137
H21D  2    0.539406    0.439246    0.444943    11.00000   -1.50000
H21E  2    0.564430    0.354754    0.446678    11.00000   -1.50000
H21F  2    0.506255    0.383635    0.506176    11.00000   -1.50000
AFIX   0
C22B  1    0.488318    0.376114    0.287378    11.00000    0.02905    0.02946 =
         0.02350    0.00374    0.00644    0.00648
AFIX 137
H22D  2    0.452733    0.361204    0.249608    11.00000   -1.50000
H22E  2    0.531074    0.345528    0.281708    11.00000   -1.50000
H22F  2    0.500790    0.428142    0.279645    11.00000   -1.50000
AFIX   0
HKLF 4


REM  pimx003_pca21_2604_a.res in Pca2(1)
REM wR2 = 0.0679, GooF = S = 1.014, Restrained GooF = 1.014 for all data
REM R1 = 0.0280 for 10341 Fo > 4sig(Fo) and 0.0307 for all 10939 data
REM 588 parameters refined using 1 restraints

END

WGHT      0.0513      0.0000

REM Highest difference peak  0.454,  deepest hole -0.251,  1-sigma level  0.055
Q1    1   0.6036  1.0141  0.5909  11.00000  0.05    0.45
Q2    1   0.3703  0.4651  0.3919  11.00000  0.05    0.43
Q3    1   0.3636  0.4707  0.3691  11.00000  0.05    0.43
Q4    1   0.7360  0.9976  0.7584  11.00000  0.05    0.38
Q5    1   0.5730  0.9972  0.6124  11.00000  0.05    0.36
Q6    1   0.2715  0.4292  0.4579  11.00000  0.05    0.36
Q7    1   0.6381  0.9187  0.6120  11.00000  0.05    0.35
Q8    1   0.6841  0.7994  0.6447  11.00000  0.05    0.35
Q9    1   0.3103  0.6154  0.3241  11.00000  0.05    0.34
Q10   1   0.3487  0.5613  0.3647  11.00000  0.05    0.34
Q11   1   0.2848  0.6132  0.3172  11.00000  0.05    0.33
Q12   1   0.7136  0.8877  0.6696  11.00000  0.05    0.33
Q13   1   0.2942  0.4883  0.2269  11.00000  0.05    0.33
Q14   1   0.6645  1.0072  0.7708  11.00000  0.05    0.33
Q15   1   0.7074  1.0765  0.5458  11.00000  0.05    0.32
Q16   1   0.2376  0.6734  0.3176  11.00000  0.05    0.32
Q17   1   0.3313  0.5299  0.3334  11.00000  0.05    0.32
Q18   1   0.4063  0.5590  0.3743  11.00000  0.05    0.31
Q19   1   0.2740  0.3516  0.4334  11.00000  0.05    0.31
Q20   1   0.6130  0.9016  0.6368  11.00000  0.05    0.30
;
_shelx_res_checksum              52427
_shelx_hkl_file                  
;
 -24   0  -2  308.63   13.60   4-0.46716-0.44236 0.88054-0.88380 0.07614-0.15666
 -24   0   6  321.01   16.67   3-0.46727-0.44193 0.88056-0.88136 0.07524 0.16906
 -24   1  -6   24.58   11.21   3-0.46800-0.43993 0.88067-0.84367 0.06879-0.31018
 -23   3 -11   47.21   10.57   2-0.46906-0.40089 0.88078-0.76638 0.05905-0.50356
 -22  -1  -1  130.42   13.99   4-0.46601-0.36722 0.88028-0.92217 0.08594-0.12626
 -22   0  -6    3.72    8.60   2-0.46960-0.36351 0.88080-0.88427 0.05401-0.29571
 -22   0   9  289.67   11.73   3-0.46841-0.36577 0.88072-0.88135 0.06512 0.29930
 -22   2  13  140.34   10.49   2-0.46948-0.36351 0.88079-0.80303 0.05514 0.47203
 -22   3 -12   31.82   10.28   2-0.47003-0.36072 0.88080-0.76570 0.04985-0.53410
 -22   4 -13  205.78   10.54   3-0.46902-0.36382 0.88077-0.72691 0.05944-0.58384
 -21  -1   7   69.49   11.93   4-0.46733-0.32781 0.88057-0.92142 0.07466 0.20916
 -21   0  -7    8.88    8.41   2-0.46924-0.32562 0.88079-0.88346 0.05743-0.33920
 -21   0  10    1.70   10.22   2-0.46911-0.32359 0.88078-0.88100 0.05864 0.34495
 -21   1  -9   36.21   10.11   3-0.46827-0.32554 0.88071-0.84393 0.06636-0.42838
 -21   1  12   14.18   10.75   2-0.46937-0.32614 0.88079-0.84170 0.05621 0.42998
 -21   2 -11   32.10    9.75   2-0.46947-0.32369 0.88079-0.80520 0.05527-0.49863
 -21   3  15   65.89   10.58   2-0.46982-0.32538 0.88080-0.76392 0.05192 0.55687
 -20  -1  -5  112.42    8.48   3-0.46907-0.28785 0.88078-0.92247 0.05902-0.26006
 -20  -1   8  380.18   11.44   3-0.46863-0.28984 0.88074-0.92094 0.06308 0.26039
 -20   0  -8   79.14    8.60   2-0.46986-0.28563 0.88080-0.88336 0.05147-0.37384
 -20   1 -10    8.61    8.76   3-0.46959-0.28644 0.88080-0.84340 0.05409-0.45650
 -20   3 -13  134.08    9.86   2-0.46962-0.28586 0.88080-0.76523 0.05384-0.57838
 -20   4 -14  121.16    9.63   3-0.46901-0.28755 0.88077-0.72693 0.05958-0.62502
 -20   5 -15    0.17   10.01   3-0.46893-0.28478 0.88077-0.68309 0.06030-0.67379
 -19  -2  -1   42.20   10.72   4-0.46736-0.25092 0.88057-0.96177 0.07439-0.11410
 -19  -2   5  184.26   12.82   4-0.46609-0.25388 0.88030-0.96021 0.08525 0.11748
 -19  -1  -6  160.45    8.45   3-0.46941-0.24925 0.88079-0.92237 0.05579-0.29766
 -19  -1   9   60.49    9.72   3-0.46822-0.25082 0.88070-0.92106 0.06677 0.29737
 -19   1  13   31.16    8.41   2-0.46983-0.25048 0.88080-0.84275 0.05182 0.47571
 -19   2 -12  102.07    9.14   2-0.46935-0.24846 0.88079-0.80493 0.05638-0.54057
 -19   3  16   11.13    9.99   3-0.46954-0.25143 0.88080-0.76322 0.05456 0.59448
 -18  -2   6   15.69   10.80   3-0.46867-0.21235 0.88075-0.96023 0.06270 0.18107
 -18   0  -9  256.79    9.18   3-0.46918-0.21190 0.88078-0.88316 0.05794-0.42056
 -18   0  12   90.73    9.94   3-0.46847-0.21300 0.88073-0.88110 0.06450 0.42132
 -18   1 -11  115.82    9.00   2-0.46981-0.21032 0.88080-0.84394 0.05198-0.49538
 -18   2  15   11.23    9.31   2-0.46981-0.21280 0.88080-0.80297 0.05193 0.55581
 -18   4 -15   45.17    9.70   2-0.46995-0.20880 0.88080-0.72626 0.05065-0.65640
 -18   5 -16   21.29   10.34   2-0.46976-0.21005 0.88080-0.68664 0.05242-0.69733
 -18   6 -17   50.76   10.07   2-0.47030-0.20838 0.88079-0.64783 0.04721-0.73396
 -17  -2  -4  276.02    8.99   3-0.46940-0.17435 0.88079-0.96120 0.05589-0.21655
 -17  -2   7   16.86    9.25   3-0.46828-0.17433 0.88071-0.96020 0.06626 0.21746
 -17  -1  -7   93.47    9.37   3-0.46836-0.17426 0.88072-0.92230 0.06554-0.34724
 -17  -1  10  105.82    8.18   3-0.46934-0.17443 0.88079-0.92058 0.05644 0.34834
 -17   0  12   -8.61    7.82   3-0.46978-0.18171 0.88080-0.88326 0.05227 0.43113
 -17   1  14   48.30    8.96   3-0.46935-0.17463 0.88079-0.84142 0.05633 0.51025
 -17   3 -14   43.72    9.24   3-0.46930-0.17269 0.88079-0.76551 0.05681-0.62142
 -17   4 -15   49.81    8.93   3-0.46881-0.17352 0.88076-0.72626 0.06138-0.66664
 -17   4  18  108.22   10.02   3-0.46890-0.17441 0.88077-0.72275 0.06054 0.66775
 -17   5 -16  328.83    9.73   3-0.46879-0.17471 0.88076-0.68720 0.06156-0.70652
 -17   6 -17   15.46   10.41   2-0.46938-0.17317 0.88079-0.64809 0.05607-0.74287
 -17   7 -18  108.77   10.18   2-0.47009-0.17156 0.88080-0.60841 0.04924-0.77601
 -16   0 -10  427.47    8.92   2-0.47018-0.13467 0.88079-0.88316 0.04839-0.45134
 -16   2 -13   82.79    8.80   2-0.46943-0.13484 0.88079-0.80472 0.05564-0.57989
 -16   3  17   40.07    9.53   2-0.46938-0.13677 0.88079-0.76235 0.05613 0.63135
 -16   4  18  179.68   10.50   2-0.46961-0.13702 0.88080-0.72433 0.05387 0.67456
 -16   5  19   26.76   11.03   2-0.46959-0.13663 0.88080-0.68405 0.05411 0.71546
 -16   7 -18   86.96   10.91   2-0.46937-0.13486 0.88079-0.60869 0.05618-0.78306
 -15  -2  -5  138.57    8.59   3-0.46916-0.09786 0.88078-0.96150 0.05813-0.25919
 -15  -2   8  659.31   11.30   3-0.46869-0.10040 0.88075-0.95963 0.06256 0.26128
 -15  -1  -8  359.10    8.80   2-0.46958-0.09777 0.88080-0.92223 0.05417-0.37623
 -15   0 -10   -6.74    8.06   3-0.46923-0.09541 0.88079-0.87985 0.05748-0.46758
 -15   2 -13  126.18    8.53   3-0.46869-0.09940 0.88075-0.80463 0.06255-0.58716
 -15   2  16  110.97    8.71   3-0.46911-0.09952 0.88078-0.80127 0.05866 0.58856
 -15   3  17   23.18    8.74   2-0.46976-0.09907 0.88080-0.76334 0.05249 0.63701
 -15   4  18   19.81    7.34   2-0.47031-0.09879 0.88079-0.72362 0.04707 0.68182
 -15   5  19  139.31    7.99   2-0.47018-0.09856 0.88079-0.68516 0.04837 0.72049
 -15   7 -18    9.75    9.46   3-0.46858-0.09743 0.88074-0.60756 0.06355-0.78952
 -15   8 -19   24.82   10.95   2-0.46980-0.09614 0.88080-0.56862 0.05212-0.81811
 -14  -2   8  599.36    9.94   2-0.46957-0.06124 0.88080-0.96048 0.05424 0.26980
 -14  -1  -8   46.97    8.13   3-0.46881-0.06040 0.88076-0.92220 0.06142-0.38410
 -14  -1  11  710.03    9.54   3-0.46909-0.06234 0.88078-0.91960 0.05877 0.38614
 -14   0  13  215.99    8.69   3-0.46929-0.06221 0.88079-0.88027 0.05695 0.46867
 -14   1 -12  640.38    9.45   2-0.46986-0.05923 0.88080-0.84397 0.05145-0.53500
 -14   2  16  151.40    8.84   2-0.46948-0.06094 0.88079-0.80238 0.05514 0.59212
 -14   3  17   75.79    6.58   2-0.47036-0.06016 0.88079-0.76359 0.04663 0.64139
 -14   6  20   95.03   10.14   2-0.47007-0.06036 0.88080-0.64511 0.04947 0.76045
 -14   8 -19   22.15   10.87   2-0.46960-0.05893 0.88080-0.56908 0.05404-0.82136
 -13  -3   3 1482.64   22.77   5-0.46498-0.02759 0.87999-0.99922 0.09439 0.02734
 -13  -1  11   87.03    8.20   2-0.46940-0.02255 0.88079-0.92001 0.05593 0.38929
 -13   0  13   -1.95    7.88   2-0.46951-0.02340 0.88080-0.88081 0.05488 0.47101
 -13   1 -12  476.70    9.36   2-0.46955-0.02195 0.88080-0.84385 0.05450-0.53802
 -13   2  16  292.28    9.42   2-0.46963-0.02331 0.88080-0.80302 0.05371 0.59377
 -13   6  20   44.35    7.84   2-0.47031-0.02166 0.88079-0.64485 0.04707 0.76262
 -13   8 -19  282.84   10.92   3-0.46933-0.02141 0.88079-0.56930 0.05654-0.82310
 -12  -3   3  684.36   16.72   4-0.46638 0.01169 0.88037-0.99906 0.08282 0.03908
 -12  -1  11   64.30    8.23   3-0.46942 0.01512 0.88079-0.92011 0.05575 0.38922
 -12   0  13  229.25    8.33   2-0.46948 0.01408 0.88079-0.88108 0.05518 0.47070
 -12   1 -12  406.43    8.80   2-0.46951 0.01583 0.88080-0.84381 0.05485-0.53830
 -12   2  16  111.67    8.54   2-0.46972 0.01478 0.88080-0.80268 0.05284 0.59435
 -12   6  20   15.28    7.53   2-0.47036 0.01477 0.88079-0.64440 0.04663 0.76304
 -12   7  21   41.54   10.70   2-0.46948 0.01377 0.88079-0.60448 0.05514 0.79509
 -12   8 -19   44.81   10.19   3-0.46933 0.01681 0.88079-0.56855 0.05656-0.82378
 -11  -2   8  409.27    9.20   2-0.46975 0.05313 0.88080-0.96030 0.05255 0.27132
 -11  -1  -8   39.73    7.67   3-0.46873 0.05325 0.88075-0.92242 0.06211-0.38454
 -11  -1  11   30.13    7.98   3-0.46924 0.05296 0.88079-0.91967 0.05741 0.38674
 -11   0  13   -6.87    7.99   3-0.46939 0.04696 0.88079-0.88151 0.05596 0.46761
 -11   1 -12  253.48    8.39   2-0.46978 0.05457 0.88080-0.84369 0.05229-0.53597
 -11   2  16  275.33    8.89   2-0.46953 0.05213 0.88080-0.80225 0.05463 0.59269
 -11   3  17  187.66    6.59   2-0.47049 0.05240 0.88078-0.76300 0.04533 0.64235
 -11   6  20  335.29    8.22   2-0.47018 0.05181 0.88079-0.64507 0.04837 0.76073
 -11   7  21   10.82   10.21   2-0.46946 0.05188 0.88079-0.60437 0.05531 0.79348
 -11   8 -19   52.18    9.63   2-0.46949 0.05492 0.88080-0.56863 0.05501-0.82211
 -10  -2  -5  313.29    8.94   3-0.46878 0.09062 0.88076-0.96113 0.06169-0.26272
 -10  -2   8  597.85    9.77   3-0.46915 0.08996 0.88078-0.95911 0.05826 0.26557
 -10  -1  -8 1143.82   10.70   3-0.46938 0.09124 0.88079-0.92209 0.05604-0.37805
 -10   0 -10   40.37    8.01   3-0.46909 0.09176 0.88078-0.88322 0.05879-0.46186
 -10   1 -12  644.59    7.31   2-0.47040 0.09286 0.88078-0.84416 0.04620-0.52991
 -10   2  16  150.61    8.84   3-0.46924 0.08989 0.88079-0.80132 0.05741 0.58927
 -10   3  17  653.62    9.33   2-0.47004 0.08997 0.88080-0.76319 0.04980 0.63781
 -10   4  18  542.94    7.78   2-0.47045 0.08985 0.88078-0.72355 0.04577 0.68244
 -10   5  19   28.96    6.58   2-0.47031 0.09080 0.88079-0.68393 0.04707 0.72201
 -10   6  20   52.81    8.88   2-0.46969 0.08981 0.88080-0.64411 0.05309 0.75789
 -10   7  21   13.65    9.43   2-0.46928 0.09010 0.88079-0.60425 0.05703 0.79002
 -10   8 -19   90.01    9.26   2-0.46982 0.09305 0.88080-0.56893 0.05188-0.81851
 -10  10 -20   71.90    9.37   3-0.46881 0.09096 0.88076-0.49014 0.06138-0.86813
  -9   0 -10   -1.96    8.06   3-0.46976 0.13362 0.88080-0.87840 0.05249-0.46082
  -9   2 -13  128.95    8.20   3-0.46927 0.12961 0.88079-0.80457 0.05712-0.58141
  -9   3  17  701.97    9.38   2-0.46948 0.12694 0.88079-0.76226 0.05512 0.63250
  -9   4  18   50.81    8.26   2-0.46982 0.12791 0.88080-0.72408 0.05184 0.67565
  -9   5  19   25.84    9.09   2-0.46973 0.12860 0.88080-0.68379 0.05271 0.71626
  -9   6  20  169.61    9.69   2-0.46941 0.12739 0.88079-0.64364 0.05580 0.75277
  -9   7 -18  280.04    8.95   3-0.46915 0.12915 0.88078-0.60868 0.05822-0.78436
  -9   8 -19   -4.37    6.57   2-0.47040 0.13771 0.88078-0.56283 0.04620-0.81647
  -9  10 -20   -0.97    9.75   3-0.46942 0.13741 0.88079-0.48388 0.05575-0.86558
  -8  -2  -4 2096.55   15.15   3-0.46874 0.16642 0.88075-0.96096 0.06202-0.22264
  -8  -2   7 1757.26   12.73   3-0.46926 0.16586 0.88079-0.95907 0.05720 0.22606
  -8  -1  10 1211.34   10.64   2-0.46961 0.16629 0.88080-0.92043 0.05386 0.35075
  -8   0  12  308.57    6.47   2-0.47045 0.16697 0.88078-0.88123 0.04577 0.43941
  -8   1  14  109.01    8.20   2-0.46954 0.16707 0.88080-0.84164 0.05455 0.51092
  -8   2 -13   51.91    6.08   2-0.47036 0.16998 0.88079-0.80483 0.04663-0.57052
  -8   3 -14  284.28    8.66   3-0.46909 0.16693 0.88078-0.76546 0.05877-0.62328
  -8   4  18   51.67    8.27   3-0.46922 0.16588 0.88078-0.72219 0.05758 0.66927
  -8   5  19   90.47    8.72   3-0.46913 0.16545 0.88078-0.68273 0.05842 0.70957
  -8   6 -17   50.51    8.56   3-0.46910 0.16785 0.88078-0.64760 0.05875-0.74491
  -8   7 -18  202.32    8.60   2-0.46988 0.16842 0.88080-0.60821 0.05134-0.77728
  -8   9  22   17.38   10.89   3-0.46931 0.16498 0.88079-0.52502 0.05670 0.83325
  -8  10 -20   92.66    9.07   2-0.47009 0.16854 0.88080-0.49065 0.04924-0.85626
  -7  -2   6 1483.58   13.18   2-0.46952 0.20471 0.88080-0.95977 0.05473 0.18823
  -7  -1  -7  124.96    9.19   2-0.47009 0.20600 0.88080-0.92174 0.04928-0.33035
  -7   0  12   16.30    7.54   2-0.46926 0.20409 0.88079-0.87986 0.05719 0.42618
  -7   1 -11   30.97    8.44   3-0.46945 0.20562 0.88079-0.84345 0.05540-0.49820
  -7   2  15  454.34    6.74   2-0.47023 0.20400 0.88079-0.80214 0.04794 0.55856
  -7   3 -14  276.32    6.87   2-0.47036 0.20653 0.88079-0.76557 0.04663-0.61115
  -7   4 -15  489.86    9.55   2-0.46968 0.20555 0.88080-0.72613 0.05327-0.65792
  -7   5 -16   25.84    8.39   3-0.46954 0.20609 0.88080-0.68562 0.05458-0.69992
  -7   6 -17   24.75    7.94   2-0.47009 0.20640 0.88080-0.64698 0.04924-0.73573
  -7   8  21  113.69   10.00   2-0.46972 0.20369 0.88080-0.56613 0.05284 0.79682
  -7   9 -19  379.64    9.39   3-0.46924 0.20534 0.88079-0.52963 0.05738-0.82448
  -6  -2  -2 1569.71   17.57   3-0.46914 0.24276 0.88078-0.96030 0.05833-0.13794
  -6  -2   5 3488.89   18.68   3-0.46906 0.24171 0.88078-0.95897 0.05908 0.14339
  -6  -1   9 2217.63   13.03   3-0.46928 0.24140 0.88079-0.91942 0.05705 0.30691
  -6   1  13  218.62    6.51   2-0.47049 0.24268 0.88078-0.84125 0.04533 0.48013
  -6   2 -12  353.44    8.44   3-0.46897 0.24235 0.88077-0.80464 0.05989-0.54395
  -6   3  16    2.33    5.92   2-0.47000 0.23641 0.88080-0.76384 0.05011 0.59790
  -6   6  19  193.35    6.92   2-0.47045 0.24177 0.88078-0.64468 0.04577 0.72293
  -6   7  20   16.24    9.17   2-0.46973 0.24136 0.88080-0.60449 0.05271 0.75701
  -6   8 -18  -10.00    8.24   3-0.46914 0.24997 0.88078-0.56211 0.05835-0.78998
  -6   9 -19   30.59    6.41   2-0.47031 0.24501 0.88079-0.52944 0.04707-0.81373
  -6  10  22   17.92   10.53   2-0.46960 0.24120 0.88080-0.48608 0.05399 0.83814
  -6  11 -20   68.55    9.48   2-0.46968 0.24476 0.88080-0.45040 0.05321-0.86002
  -5  -2   2 1645.01   23.56   3-0.46866 0.27987 0.88075-0.95943 0.06275 0.01878
  -5  -1   8 1163.54   12.16   2-0.46962 0.28038 0.88080-0.92013 0.05381 0.26947
  -5   0  -8   -1.72    9.22   3-0.46932 0.28414 0.88079-0.87902 0.05661-0.38465
  -5   1 -10  116.72    8.99   3-0.46935 0.28093 0.88079-0.84375 0.05637-0.45920
  -5   3 -13  476.44    9.29   3-0.46934 0.28087 0.88079-0.76543 0.05642-0.58086
  -5   4  17  346.87    8.66   3-0.46936 0.27827 0.88079-0.72208 0.05624 0.63070
  -5   5  18   17.52    8.53   2-0.46948 0.27892 0.88079-0.68277 0.05511 0.67276
  -5   6  19  702.41    9.73   3-0.46931 0.27790 0.88079-0.64321 0.05679 0.71107
  -5   7 -17 1845.58   10.85   3-0.46918 0.28058 0.88078-0.60820 0.05793-0.74424
  -5   8 -18  298.70    6.80   2-0.47027 0.28266 0.88079-0.56894 0.04750-0.77392
  -5   9  21  151.95    7.37   2-0.47014 0.27899 0.88080-0.52638 0.04880 0.80111
  -5  10 -19    9.35    8.31   2-0.46946 0.28161 0.88079-0.48852 0.05536-0.82737
  -5  12 -20  203.85    9.29   3-0.46882 0.28049 0.88076-0.41179 0.06131-0.86842
  -4  -1   7  105.59   10.26   3-0.46941 0.31846 0.88079-0.91949 0.05583 0.22602
  -4   0  10 1055.80   10.79   2-0.46945 0.31739 0.88079-0.88034 0.05547 0.34877
  -4   1  12  316.18    8.65   2-0.46990 0.31796 0.88080-0.84128 0.05114 0.43380
  -4   2 -11  207.61    8.46   3-0.46895 0.31842 0.88077-0.80433 0.06015-0.50353
  -4   3  15  370.73    6.84   2-0.47040 0.31792 0.88078-0.76269 0.04620 0.56023
  -4   4 -14 1546.80    8.96   2-0.47036 0.31991 0.88079-0.72569 0.04663-0.61099
  -4   5 -15  165.95    8.09   2-0.46999 0.32006 0.88080-0.68643 0.05024-0.65480
  -4   6 -16  137.22    6.37   2-0.47018 0.32034 0.88079-0.64722 0.04837-0.69352
  -4   8  20   24.77    8.52   2-0.47000 0.31740 0.88080-0.56526 0.05011 0.75910
  -4   9 -18   47.49    8.11   3-0.46882 0.31936 0.88076-0.52906 0.06135-0.78783
  -4  10 -19    1.15    6.31   2-0.47049 0.32739 0.88078-0.48331 0.04533-0.81350
  -4  11  22   85.46   10.63   2-0.46949 0.31596 0.88079-0.44785 0.05506 0.83447
  -4  12 -20   30.18    7.35   2-0.47027 0.32083 0.88079-0.41078 0.04750-0.85487
  -3  -1   5  254.05    8.92   2-0.47045 0.35784 0.88078-0.91973 0.04577 0.15584
  -3   0   9   -1.34    9.41   2-0.46955 0.35531 0.88080-0.88049 0.05444 0.30973
  -3   2  13  151.31    6.22   2-0.47018 0.35557 0.88079-0.80179 0.04837 0.47692
  -3   3 -12  177.20    8.40   2-0.46952 0.35746 0.88080-0.76469 0.05475-0.53802
  -3   4  16  153.08    8.93   2-0.46940 0.35427 0.88079-0.72265 0.05589 0.59053
  -3   5  17  305.31    9.12   2-0.46976 0.35473 0.88080-0.68384 0.05242 0.63475
  -3   6  18  359.05    9.03   2-0.46968 0.35446 0.88080-0.64474 0.05325 0.67455
  -3   7  19  479.54    9.64   2-0.46936 0.35354 0.88079-0.60406 0.05628 0.71167
  -3   8 -17  106.03    8.41   3-0.46932 0.35729 0.88079-0.56905 0.05661-0.74235
  -3   9 -18  334.82    6.85   2-0.47062 0.35900 0.88077-0.52955 0.04403-0.77025
  -3  10  21    8.36    9.81   3-0.46954 0.35491 0.88080-0.48577 0.05459 0.79660
  -3  11 -19  127.25    8.97   2-0.46969 0.35808 0.88080-0.44986 0.05311-0.81973
  -3  13 -20   68.43    9.25   2-0.46989 0.35863 0.88080-0.37122 0.05126-0.85793
  -2   0  -5 3580.64   19.03   3-0.46899 0.39356 0.88077-0.88193 0.05977-0.26058
  -2   1  -8 2280.82   11.32   2-0.47058 0.39534 0.88077-0.84313 0.04446-0.36608
  -2   2 -10  267.69    6.65   2-0.47071 0.39569 0.88077-0.80415 0.04316-0.44536
  -2   3  14   70.67    8.32   2-0.46950 0.39318 0.88080-0.76243 0.05495 0.51054
  -2   5 -14  189.13    6.55   2-0.47027 0.39569 0.88079-0.68664 0.04750-0.61174
  -2   6 -15  478.33    7.14   2-0.47018 0.39596 0.88079-0.64719 0.04837-0.65326
  -2   7 -16  183.62    6.13   2-0.47053 0.39631 0.88078-0.60759 0.04490-0.69012
  -2   8  19   11.98    6.40   2-0.47040 0.39360 0.88078-0.56471 0.04620 0.72282
  -2   9  20   28.34    9.30   2-0.46942 0.39228 0.88079-0.52489 0.05573 0.75295
  -2  10 -18  210.84    8.67   2-0.46979 0.39606 0.88080-0.48941 0.05216-0.77859
  -2  11  21   49.31    7.25   2-0.47014 0.39311 0.88080-0.44722 0.04880 0.80122
  -2  12 -19  151.70    9.64   3-0.46940 0.39543 0.88079-0.41083 0.05589-0.82306
  -2  14 -20   53.55    9.41   2-0.47000 0.39674 0.88080-0.33186 0.05015-0.85729
  -1   0   6   -2.05   11.20   3-0.46964 0.42947 0.88080-0.88130 0.05358 0.19166
  -1   1   9   34.01    6.37   2-0.47075 0.43229 0.88076-0.84192 0.04273 0.31861
  -1   2  -9 3780.71   13.10   2-0.47027 0.43300 0.88079-0.80380 0.04750-0.40963
  -1   3  13  687.72    7.26   2-0.47036 0.43154 0.88079-0.76236 0.04663 0.47868
  -1   4 -12  765.67    9.58   2-0.46960 0.43247 0.88080-0.72536 0.05395-0.53741
  -1   5  16  161.52    8.33   3-0.46916 0.42967 0.88078-0.68268 0.05814 0.58789
  -1   6  17   62.12    8.57   2-0.46937 0.43018 0.88079-0.64330 0.05616 0.63034
  -1   7  18  869.39    9.57   3-0.46914 0.42927 0.88078-0.60357 0.05838 0.66905
  -1   8 -16   74.22    8.47   3-0.46941 0.43423 0.88079-0.56823 0.05583-0.70077
  -1   9 -17  125.00    6.35   2-0.47053 0.43452 0.88078-0.52928 0.04490-0.73050
  -1  10  20  188.20    8.94   2-0.46990 0.43001 0.88080-0.48657 0.05108 0.75805
  -1  11 -18  312.57    9.52   3-0.46940 0.43305 0.88079-0.45058 0.05586-0.78233
  -1  12  21    8.94    7.46   2-0.47027 0.43143 0.88079-0.40704 0.04750 0.80292
  -1  13 -19   91.76    9.59   2-0.46942 0.43426 0.88079-0.37091 0.05573-0.82244
  -1  15 -20  142.79    8.15   2-0.47045 0.43547 0.88078-0.29302 0.04577-0.85263
   0   1   8  827.10   11.27   3-0.46935 0.46895 0.88079-0.84048 0.05635 0.26658
   0   2  -8 4625.88   14.90   2-0.47071 0.47114 0.88077-0.80378 0.04316-0.36478
   0   3  12  823.87    7.65   2-0.47071 0.46969 0.88077-0.76200 0.04316 0.44198
   0   4  14  710.71    9.51   3-0.46899 0.46774 0.88077-0.72199 0.05974 0.50631
   0   5  15   -9.89    8.07   3-0.46973 0.46485 0.88080-0.68380 0.05271 0.55910
   0   6  16  118.36    6.24   2-0.47040 0.46901 0.88078-0.64465 0.04620 0.60053
   0   7  17    3.44    5.77   2-0.47036 0.46934 0.88079-0.60396 0.04663 0.64117
   0   8  18   -1.35    7.92   3-0.46964 0.46357 0.88080-0.56542 0.05358 0.67937
   0   9  19    3.82    8.20   2-0.46946 0.46728 0.88079-0.52553 0.05531 0.70826
   0  10 -17    3.55    7.80   2-0.47009 0.47164 0.88080-0.48853 0.04924-0.73586
   0  11  20  472.47    9.72   2-0.47008 0.46781 0.88080-0.44745 0.04934 0.75977
   0  12 -18  204.56    9.29   3-0.46941 0.47111 0.88079-0.41096 0.05583-0.78216
   0  13  21   -0.82    9.89   3-0.46978 0.46331 0.88080-0.36872 0.05227 0.80369
   0  14 -19   -7.58    9.20   3-0.46969 0.47807 0.88080-0.32650 0.05314-0.81695
   1   1   6  346.59   11.70   3-0.46927 0.50686 0.88079-0.84079 0.05715 0.18419
   1   2   9 3881.09   14.44   2-0.46984 0.50717 0.88080-0.80163 0.05173 0.31186
   1   3  11 1274.08    8.73   2-0.47036 0.50748 0.88079-0.76219 0.04663 0.39779
   1   4  13  191.63    8.59   3-0.46928 0.50616 0.88079-0.72205 0.05700 0.46785
   1   5  14  991.29    8.10   2-0.47053 0.50722 0.88078-0.68360 0.04490 0.52125
   1   6 -13   33.37    5.86   2-0.47053 0.51057 0.88078-0.64648 0.04490-0.56876
   1   7 -14  760.28    7.42   2-0.47036 0.50953 0.88079-0.60747 0.04663-0.61125
   1   9  18  310.08    6.96   2-0.47027 0.50616 0.88079-0.52615 0.04750 0.68050
   1  10  19  198.99    9.34   3-0.46929 0.50523 0.88079-0.48507 0.05689 0.71107
   1  11 -17   83.36    8.11   2-0.47007 0.51035 0.88080-0.44943 0.04947-0.73494
   1  12  20   81.01    9.12   2-0.46984 0.50635 0.88080-0.40756 0.05171 0.75751
   1  13 -18   71.07    8.52   2-0.46988 0.51037 0.88080-0.37077 0.05128-0.77759
   1  14  21   75.35   11.46   2-0.46956 0.50663 0.88080-0.32853 0.05435 0.79495
   1  16 -19   11.79   10.84   3-0.46933 0.50972 0.88079-0.25237 0.05653-0.82401
   2   2   7 2667.78   12.69   2-0.47062 0.54578 0.88077-0.80166 0.04403 0.23846
   2   3  10  106.19    9.21   3-0.46935 0.54442 0.88079-0.76154 0.05636 0.34716
   2   4  -9  174.81    9.04   3-0.46900 0.54548 0.88077-0.72494 0.05965-0.42225
   2   5  13  229.76    6.38   2-0.47071 0.54506 0.88077-0.68310 0.04316 0.48232
   2   6 -12  518.33    8.64   2-0.46998 0.54665 0.88080-0.64645 0.05033-0.53406
   2   7 -13   96.90    8.18   2-0.46952 0.54698 0.88080-0.60656 0.05479-0.57883
   2   8 -14  293.12    8.62   2-0.46974 0.54674 0.88080-0.56764 0.05263-0.61738
   2   9 -15  263.32    6.25   2-0.47049 0.54783 0.88078-0.52869 0.04533-0.65021
   2  10  18  216.20    6.88   2-0.47027 0.54431 0.88079-0.48675 0.04750 0.68039
   2  11  19  124.44    8.44   3-0.46910 0.54342 0.88078-0.44580 0.05872 0.70862
   2  13  20    5.77   10.12   3-0.46919 0.54406 0.88078-0.36697 0.05791 0.75214
   2  15 -18  380.85    9.98   3-0.46904 0.54596 0.88078-0.29309 0.05924-0.78650
   3   3   8 1255.66    9.39   2-0.47031 0.58323 0.88079-0.76225 0.04707 0.27563
   3   4  -8 1268.62    9.92   2-0.47062 0.58457 0.88077-0.72489 0.04403-0.36588
   3   5  12   73.02    6.07   2-0.47018 0.58287 0.88079-0.68308 0.04837 0.43603
   3   6 -11  107.79    5.99   2-0.47009 0.58503 0.88080-0.64587 0.04924-0.49227
   3   7 -12  469.34    8.73   3-0.46937 0.58389 0.88079-0.60744 0.05619-0.54043
   3   8 -13  504.19    8.97   3-0.46929 0.58394 0.88079-0.56810 0.05691-0.58175
   3   9 -14  580.02    8.97   2-0.46968 0.58442 0.88080-0.52812 0.05323-0.61792
   3  11  18   19.33    8.37   2-0.46982 0.58267 0.88080-0.44677 0.05184 0.67606
   3  12 -16  130.10    8.66   3-0.46942 0.58487 0.88079-0.41045 0.05566-0.70141
   3  13  19  136.80    7.57   2-0.47027 0.58270 0.88079-0.36884 0.04750 0.72163
   3  14 -17  156.06    9.35   3-0.46944 0.58499 0.88079-0.33218 0.05548-0.74162
   3  15  20   34.01   10.42   2-0.46971 0.58270 0.88080-0.28805 0.05296 0.75767
   3  17 -18   -0.40   10.88   3-0.46923 0.58539 0.88079-0.21279 0.05748-0.78392
   4   3  -3 1301.76   17.03   3-0.46922 0.62034 0.88078-0.76370 0.05756-0.17835
   4   3   6 3188.31   15.87   3-0.46898 0.61992 0.88077-0.76164 0.05985 0.18228
   4   4  -6  331.89   10.57   3-0.46916 0.62090 0.88078-0.72471 0.05818-0.29985
   4   5  -8   56.90    9.03   3-0.46904 0.62188 0.88078-0.68516 0.05925-0.38072
   4   7 -11  305.07    8.48   2-0.46967 0.62194 0.88080-0.60682 0.05337-0.49672
   4   8 -12  166.58    7.99   3-0.46933 0.62242 0.88079-0.56757 0.05657-0.54077
   4   9 -13 1022.48    9.97   3-0.46948 0.62201 0.88079-0.52830 0.05511-0.57978
   4  10 -14    6.76    5.92   2-0.47027 0.62312 0.88079-0.48787 0.04750-0.61318
   4  11  17  162.62    6.66   2-0.47040 0.62049 0.88078-0.44709 0.04620 0.64131
   4  12  18  159.75    8.93   3-0.46918 0.61872 0.88078-0.40695 0.05793 0.66919
   4  14  19   84.76   10.07   3-0.46931 0.62006 0.88079-0.32698 0.05673 0.71065
   4  16 -17    6.00    9.86   3-0.46935 0.62295 0.88079-0.25207 0.05632-0.74224
   5   5   9  887.41   10.58   2-0.46968 0.65848 0.88080-0.68340 0.05325 0.31034
   5   6  11 1422.17   10.50   3-0.46933 0.65755 0.88079-0.64320 0.05654 0.38798
   5   8 -11 1819.41   10.95   2-0.46990 0.65992 0.88080-0.56727 0.05114-0.49443
   5   9 -12  301.85    8.58   2-0.46972 0.66010 0.88080-0.52763 0.05284-0.53650
   5  10 -13  270.16    6.61   2-0.47031 0.66091 0.88079-0.48878 0.04707-0.57132
   5  11  16  129.45    6.69   2-0.47049 0.65894 0.88078-0.44658 0.04533 0.60214
   5  12  17    7.67    9.14   2-0.46946 0.65725 0.88079-0.40657 0.05531 0.63165
   5  13 -15  581.61    9.44   2-0.47013 0.66116 0.88080-0.37114 0.04887-0.65386
   5  14  18   21.28    9.59   2-0.46963 0.65827 0.88080-0.32782 0.05375 0.67500
   5  15 -16   24.50    6.64   2-0.47036 0.66220 0.88079-0.29095 0.04663-0.69232
   5  16 -16   18.91    8.94   3-0.46886 0.66129 0.88076-0.25109 0.06094-0.70861
   5  16  19   11.05   10.01   2-0.46928 0.65650 0.88079-0.25019 0.05707 0.70927
   6   5  -4  418.75   11.76   2-0.46957 0.69652 0.88080-0.68454 0.05431-0.21529
   6   6   9   -1.92    8.56   3-0.46946 0.69763 0.88079-0.64360 0.05531 0.30989
   6   7  -8  454.17    8.89   3-0.46880 0.69670 0.88076-0.60641 0.06154-0.38474
   6   7  11   13.73    7.94   3-0.46912 0.69520 0.88078-0.60373 0.05851 0.38580
   6   8  12  233.58    6.46   2-0.47031 0.69658 0.88079-0.56497 0.04707 0.43824
   6  11  15  110.11    6.46   2-0.47018 0.69699 0.88079-0.44654 0.04837 0.55777
   6  12  16  230.51    9.02   2-0.46932 0.69505 0.88079-0.40667 0.05661 0.58978
   6  13 -14   73.30    8.11   2-0.47003 0.69894 0.88080-0.36945 0.04986-0.61423
   6  14  17    2.75    9.50   3-0.46964 0.69195 0.88080-0.32879 0.05358 0.63996
   6  15 -15   36.64    8.63   2-0.46999 0.69885 0.88080-0.29127 0.05022-0.65510
   6  16  18   18.45   10.35   3-0.46936 0.69532 0.88079-0.24892 0.05625 0.67175
   6  18 -16    8.60    9.68   3-0.46976 0.69790 0.88080-0.17426 0.05250-0.69642
   7   7   9  611.40    9.17   3-0.46933 0.73366 0.88079-0.60372 0.05654 0.30700
   7   8  -8 1277.89   11.30   2-0.46988 0.73519 0.88080-0.56670 0.05130-0.37344
   7   9  12  169.26    8.37   3-0.46930 0.73316 0.88079-0.52504 0.05688 0.42821
   7  10  13  628.30    9.34   2-0.46952 0.73360 0.88080-0.48622 0.05473 0.47106
   7  11  14  357.30    9.01   2-0.46937 0.73321 0.88079-0.44635 0.05617 0.50951
   7  12 -12  190.04    8.61   3-0.46937 0.73577 0.88079-0.41008 0.05617-0.54082
   7  14  16   85.75    9.37   2-0.46949 0.73387 0.88079-0.32835 0.05500 0.59173
   7  15 -14   72.08    8.65   2-0.47030 0.73761 0.88079-0.29099 0.04718-0.61118
   7  16  17   18.96   10.59   3-0.46928 0.73306 0.88079-0.24894 0.05705 0.63037
   7  18 -15   31.88    9.42   2-0.46987 0.73698 0.88080-0.17305 0.05142-0.65519
   7  19 -15   38.22   10.71   3-0.46916 0.73723 0.88078-0.13323 0.05812-0.66415
   8   7   6   15.91    7.80   2-0.46969 0.77315 0.88080-0.60408 0.05317 0.18692
   8   9  10   36.13    7.95   2-0.46981 0.77259 0.88080-0.52600 0.05202 0.35113
   8  13  14   14.53    8.57   2-0.46973 0.77277 0.88080-0.36718 0.05278 0.51440
   8  14 -12   28.71    8.35   3-0.46929 0.77464 0.88079-0.33003 0.05694-0.54133
   8  16 -13   18.32    8.92   3-0.46930 0.77462 0.88079-0.25126 0.05680-0.58226
   8  17  16   14.77    9.69   2-0.46973 0.77311 0.88080-0.20851 0.05273 0.59645
   8  19 -14   13.68   10.04   3-0.46940 0.77413 0.88079-0.13345 0.05589-0.62063
   9   8  -2  162.01   16.69   5-0.46461 0.80569 0.87988-0.56488 0.09733-0.17799
   9   8   5  726.80   10.11   2-0.46961 0.81024 0.88080-0.56519 0.05387 0.14818
   9   9   8  170.82    9.28   3-0.46866 0.80844 0.88075-0.52528 0.06277 0.26042
   9  11  -8  352.75    9.33   2-0.46953 0.81096 0.88080-0.44843 0.05463-0.37742
   9  12  -9  682.03    9.93   3-0.46938 0.81105 0.88079-0.40948 0.05607-0.41948
   9  13 -10  521.48    9.49   2-0.46985 0.81127 0.88080-0.36973 0.05158-0.45473
   9  15 -11  301.07   10.48   3-0.46818 0.80992 0.88070-0.29098 0.06713-0.51115
   9  15  14  158.44    9.26   2-0.46934 0.80893 0.88079-0.28849 0.05650 0.50918
   9  17 -12   -8.87   10.04   3-0.46859 0.81521 0.88074-0.20767 0.06341-0.54256
   9  17  15  299.36   10.11   3-0.46913 0.80820 0.88078-0.20987 0.05845 0.54753
   9  18  15   14.02    9.60   2-0.46989 0.81120 0.88080-0.16933 0.05125 0.55717
   9  20 -13  206.52   11.31   2-0.46962 0.81173 0.88080-0.09456 0.05379-0.57820
  10   9   3   26.63    9.56   3-0.46879 0.84783 0.88076-0.52558 0.06163 0.05845
  10  12  -7  133.74    8.80   2-0.46956 0.84875 0.88080-0.40891 0.05436-0.33676
  10  13  -8  910.90   10.77   3-0.46940 0.84888 0.88079-0.36993 0.05587-0.37922
  10  13  11  278.26    9.98   3-0.46872 0.84630 0.88075-0.36729 0.06228 0.38205
  10  16 -10  105.52   10.04   3-0.46849 0.84821 0.88073-0.25113 0.06432-0.46823
  10  16  13  101.89    9.09   3-0.46915 0.84708 0.88078-0.24860 0.05822 0.46667
  10  18 -11   47.11    9.32   2-0.46942 0.85009 0.88079-0.17185 0.05573-0.49974
  10  19  14   19.40   11.04   2-0.46947 0.84774 0.88079-0.13081 0.05525 0.51153
  11  12   7  298.44   10.13   3-0.46885 0.88487 0.88076-0.40693 0.06107 0.22173
  11  16  -8   42.21   10.03   3-0.46789 0.88569 0.88066-0.25047 0.06973-0.39275
  11  16  11   68.14    8.69   2-0.46940 0.88562 0.88079-0.24915 0.05587 0.38862
  11  18  -9   27.10   10.50   3-0.46797 0.88618 0.88067-0.17134 0.06906-0.43242
  11  18  12   25.70    9.68   3-0.46938 0.88602 0.88079-0.16959 0.05611 0.42868
  11  21 -10   16.30   10.59   2-0.46953 0.88849 0.88080-0.05298 0.05463-0.45782
  12  13   4   14.62    9.68   3-0.46875 0.92407 0.88075-0.36694 0.06197 0.09985
  12  14  -3  496.59   16.54   5-0.46541 0.92043 0.88012-0.32900 0.09083-0.21205
  12  18  -7   10.94   10.35   3-0.46890 0.92417 0.88077-0.17228 0.06055-0.34280
  12  18  10   27.82   10.30   3-0.46865 0.92352 0.88074-0.16962 0.06292 0.34094
  13  17   6   20.20   10.08   3-0.46845 0.96061 0.88073-0.21012 0.06473 0.17779
  13  18   7   32.06   10.50   3-0.46824 0.96073 0.88070-0.17033 0.06662 0.21554
  13  19  -4    0.59   15.37   4-0.46695 0.96247 0.88050-0.13035 0.07793-0.23980
  13  20   8   40.51   11.84   3-0.46845 0.96111 0.88073-0.09152 0.06472 0.25772
  13  21  -5   25.22   13.99   3-0.46774 0.96129 0.88064-0.05318 0.07106-0.27241
  14  20   2   32.66   16.86   5-0.46449 0.99561 0.87984-0.09107 0.09831-0.01739
  14  21   3   21.23   15.13   4-0.46669 0.99765 0.88044-0.05169 0.08024 0.04113
 -25   0   3   -0.06    5.47   3-0.46672-0.47721 0.88092-0.87861 0.06415 0.05040
 -25   1  -4   16.34   10.95   4-0.46451-0.48055 0.88053-0.84372 0.08336-0.24498
 -25   1   8   19.20   13.47   4-0.46479-0.48201 0.88059-0.84277 0.08100 0.24317
 -25   2  -7    9.02   10.03   3-0.46581-0.48061 0.88079-0.80417 0.07221-0.35386
 -24   2  -8   50.29    9.42   4-0.46555-0.44289 0.88075-0.80506 0.07452-0.39822
 -24   3 -10   16.22    9.85   4-0.46585-0.44000 0.88080-0.76485 0.07187-0.47353
 -23  -1   2    0.25    5.31   3-0.46765-0.39796 0.88099-0.91810 0.05547 0.02616
 -23   0  -4    0.34    9.84   4-0.46502-0.40705 0.88064-0.88265 0.07911-0.24051
 -23   0   8   -1.88   12.09   6-0.46150-0.41548 0.87957-0.88412 0.10744 0.21729
 -23   1  -7   14.05    9.22   4-0.46567-0.40473 0.88077-0.84402 0.07350-0.35578
 -23   1  11   14.52   12.57   4-0.46380-0.40734 0.88034-0.84195 0.08931 0.35536
 -23   2  -9   10.17    9.47   4-0.46557-0.40487 0.88075-0.80491 0.07439-0.43703
 -23   4 -12    2.81   10.85   4-0.46565-0.40184 0.88076-0.72245 0.07369-0.56506
 -22   1  -8   27.33    8.81   3-0.46571-0.36654 0.88078-0.84383 0.07315-0.39533
 -22   2 -10   16.20    8.98   3-0.46593-0.36402 0.88081-0.80385 0.07124-0.47332
 -21  -1  -3   60.34    9.96   4-0.46461-0.33051 0.88055-0.92260 0.08260-0.20459
 -21   2  14   48.37   10.46   3-0.46609-0.32788 0.88084-0.80273 0.06977 0.49841
 -21   3 -12   96.44    9.69   3-0.46575-0.32833 0.88078-0.76487 0.07274-0.55661
 -20  -2   3   10.01    5.24   3-0.46575-0.29123 0.88078-0.95603 0.07282 0.05096
 -20   0  11   45.41    8.93   3-0.46572-0.29030 0.88078-0.88159 0.07302 0.37274
 -20   1  13   16.81    9.62   3-0.46593-0.29030 0.88081-0.84140 0.07118 0.45601
 -20   2 -11  295.16    9.29   4-0.46557-0.29148 0.88075-0.80505 0.07436-0.51914
 -20   3  16   43.66   10.79   3-0.46596-0.29035 0.88082-0.76284 0.07090 0.57766
 -19   0  -8   -2.34    8.16   4-0.46565-0.25265 0.88076-0.88054 0.07369-0.40397
 -19   1 -10   62.58    8.82   3-0.46575-0.25250 0.88078-0.84386 0.07282-0.47603
 -19   2  15   13.45    9.56   3-0.46635-0.25388 0.88087-0.80213 0.06748 0.54028
 -19   3 -13   31.59    9.18   3-0.46586-0.25206 0.88080-0.76422 0.07185-0.59576
 -19   4 -14  126.80    9.22   4-0.46553-0.25310 0.88074-0.72649 0.07466-0.64078
 -19   5 -15   55.98    9.67   4-0.46525-0.25287 0.88069-0.68670 0.07708-0.68330
 -19   6 -16  178.47   10.19   4-0.46564-0.25333 0.88076-0.64788 0.07373-0.71998
 -18  -1  10  346.42   10.40   4-0.46481-0.21792 0.88060-0.92090 0.08090 0.32340
 -18   1  14   62.77    9.27   3-0.46583-0.21447 0.88080-0.84164 0.07209 0.49526
 -18   2 -12  169.63    9.07   3-0.46577-0.21514 0.88079-0.80403 0.07257-0.55648
 -18   3  17   15.93    9.74   4-0.46508-0.21653 0.88066-0.76279 0.07857 0.60885
 -18   4  18   40.07   11.19   3-0.46578-0.21462 0.88079-0.72296 0.07253 0.65622
 -17   0  -9    3.19    8.15   4-0.46565-0.17776 0.88076-0.88310 0.07369-0.43669
 -17   1 -11   87.57    8.16   3-0.46636-0.17654 0.88087-0.84309 0.06740-0.51020
 -17   2  16  270.79    9.69   4-0.46520-0.17924 0.88068-0.80180 0.07753 0.56944
 -17   3  17   -3.05    9.27   4-0.46609-0.18591 0.88084-0.76482 0.06978 0.61621
 -16  -2  -4   65.27    8.93   4-0.46496-0.14026 0.88063-0.96116 0.07962-0.24093
 -16  -2   8  105.80    9.91   4-0.46455-0.14186 0.88054-0.96027 0.08308 0.24023
 -16  -1  11  320.47    9.95   4-0.46476-0.14230 0.88058-0.92039 0.08131 0.36358
 -16   0  13   55.26    8.67   3-0.46555-0.13995 0.88075-0.88095 0.07449 0.45127
 -16   1 -11  344.95    8.62   4-0.46555-0.13989 0.88075-0.84426 0.07451-0.51944
 -16   2  16   31.30    9.24   3-0.46629-0.13868 0.88087-0.80238 0.06800 0.57963
 -16   3 -14   11.75    6.32   3-0.46633-0.13803 0.88087-0.76392 0.06762-0.63215
 -16   4 -15   69.68    9.31   3-0.46586-0.13888 0.88080-0.72498 0.07177-0.67627
 -16   5 -16   65.83    9.64   3-0.46586-0.13712 0.88080-0.68545 0.07183-0.71662
 -16   6 -17  103.01    7.78   3-0.46643-0.13855 0.88088-0.64650 0.06675-0.75164
 -15  -1  11  106.55    8.23   3-0.46612-0.10239 0.88084-0.92063 0.06950 0.37583
 -15   0  13    2.38    8.15   4-0.46597-0.10480 0.88082-0.88238 0.07080 0.45772
 -15   1  15   18.13    8.60   4-0.46541-0.10288 0.88072-0.84071 0.07572 0.53059
 -15   3 -14  164.72    8.33   3-0.46572-0.10137 0.88078-0.76479 0.07301-0.63794
 -15   4 -15   38.94    8.43   4-0.46546-0.10210 0.88073-0.72592 0.07531-0.68173
 -15   5 -16   57.16    8.61   4-0.46554-0.10094 0.88075-0.68631 0.07465-0.72173
 -15   6 -17  264.90    9.94   3-0.46586-0.10190 0.88080-0.64665 0.07186-0.75731
 -14  -3   3  267.30   16.80   6-0.45923-0.07116 0.87859-0.99766 0.12423-0.00274
 -14  -2  -5   76.79    8.27   3-0.46583-0.06313 0.88080-0.96045 0.07209-0.27355
 -14   0 -10  416.92    6.78   3-0.46653-0.06424 0.88090-0.88213 0.06588-0.46855
 -14   1  15   32.46    8.67   3-0.46582-0.06425 0.88080-0.84152 0.07214 0.53514
 -14   2 -13  133.82    8.31   3-0.46610-0.06294 0.88084-0.80333 0.06972-0.59390
 -14   3 -14   27.92    8.23   4-0.46546-0.06390 0.88073-0.76524 0.07531-0.64215
 -14   6 -17  154.06    9.09   4-0.46562-0.06313 0.88076-0.64757 0.07389-0.76070
 -14   7 -18   88.90    7.51   3-0.46624-0.06292 0.88086-0.60659 0.06848-0.79374
 -13  -2  -5  527.50    9.70   4-0.46562-0.02668 0.88076-0.96133 0.07388-0.27613
 -13  -1  -8  238.33    8.27   3-0.46623-0.02605 0.88086-0.92115 0.06855-0.39021
 -13   0 -10   -2.47    7.70   4-0.46575-0.02364 0.88078-0.88137 0.07282-0.47360
 -13   1  15  129.13    8.79   3-0.46617-0.02618 0.88085-0.84162 0.06906 0.53798
 -13   2 -13  577.17    9.56   3-0.46581-0.02639 0.88079-0.80347 0.07221-0.59635
 -13   4  19  175.84    9.54   4-0.46505-0.02777 0.88065-0.72298 0.07884 0.68905
 -13   6 -17  127.25    8.87   4-0.46538-0.02574 0.88072-0.64709 0.07601-0.76324
 -13   7 -18  212.09    9.15   3-0.46601-0.02580 0.88083-0.60680 0.07049-0.79561
 -12  -2  -5  907.40   10.59   4-0.46549 0.01109 0.88074-0.96125 0.07500-0.27717
 -12  -1  -8  286.36    8.39   3-0.46619 0.01201 0.88085-0.92109 0.06887-0.39082
 -12   0 -10  262.46    8.07   3-0.46603 0.01162 0.88083-0.88176 0.07031-0.47316
 -12   1  15  107.23    8.56   3-0.46633 0.01222 0.88087-0.84111 0.06768 0.53906
 -12   2 -13  114.97    8.00   3-0.46581 0.01244 0.88079-0.80357 0.07224-0.59656
 -12   4  19  427.43    9.59   4-0.46505 0.00969 0.88065-0.72304 0.07879 0.68933
 -12   6 -17    6.48    8.22   4-0.46525 0.01207 0.88069-0.64717 0.07715-0.76346
 -12   7 -18   54.00    8.57   3-0.46603 0.01359 0.88083-0.60666 0.07035-0.79598
 -12  10 -20   15.74    7.77   3-0.46643 0.01479 0.88088-0.48852 0.06675-0.87334
 -11  -3   3  978.70   17.95   5-0.46241 0.04550 0.87990-0.99857 0.10044 0.02104
 -11  -2  -5  792.59   10.11   4-0.46575 0.04895 0.88078-0.96074 0.07282-0.27448
 -11   0 -10   -4.33    5.50   3-0.46643 0.05377 0.88088-0.87844 0.06675-0.47625
 -11   1  15   19.41    8.31   3-0.46595 0.04854 0.88082-0.84138 0.07100 0.53639
 -11   2 -13  244.62    7.99   3-0.46595 0.04988 0.88082-0.80321 0.07103-0.59498
 -11   6 -17  264.49    8.79   4-0.46553 0.05021 0.88074-0.64761 0.07471-0.76147
 -11   7 -18   37.38    8.62   3-0.46624 0.05165 0.88086-0.60695 0.06848-0.79415
 -11  10 -20  191.65    7.93   3-0.46662 0.05055 0.88091-0.48963 0.06502-0.87136
 -10  -1  11  154.57    8.17   3-0.46650 0.08740 0.88089-0.92026 0.06615 0.37899
 -10   0  13  311.17    6.98   3-0.46691 0.08735 0.88094-0.88062 0.06241 0.46346
 -10   1  15  746.09    9.59   4-0.46558 0.08564 0.88075-0.84095 0.07429 0.53223
 -10   2 -13  164.44    6.18   3-0.46653 0.08809 0.88090-0.80348 0.06588-0.59005
 -10   3 -14  632.30    9.26   4-0.46565 0.08805 0.88077-0.76504 0.07364-0.63918
 -10   5 -16   66.12    8.05   4-0.46537 0.08915 0.88071-0.68618 0.07604-0.72310
 -10   6 -17   15.18    8.65   4-0.46572 0.08857 0.88078-0.64655 0.07305-0.75882
 -10   7 -18  173.05    6.82   3-0.46662 0.08868 0.88091-0.60707 0.06502-0.79074
 -10   9 -19  343.88    9.05   4-0.46525 0.08838 0.88069-0.52969 0.07711-0.84451
  -9  -2   8  185.99    8.60   4-0.46561 0.12484 0.88076-0.95944 0.07396 0.24947
  -9  -1  11  512.12    8.91   4-0.46548 0.12350 0.88073-0.91984 0.07517 0.36961
  -9   0  13   -0.48    7.97   3-0.46594 0.12427 0.88081-0.88047 0.07108 0.45505
  -9   2  16   23.07    6.21   3-0.46662 0.12609 0.88091-0.80157 0.06502 0.58231
  -9   3 -14  282.35    8.06   3-0.46613 0.12554 0.88084-0.76401 0.06947-0.63401
  -9   4 -15 1221.09   10.10   3-0.46575 0.12571 0.88078-0.72533 0.07276-0.67795
  -9   5 -16  302.35    8.53   3-0.46578 0.12584 0.88079-0.68613 0.07253-0.71760
  -9   6 -17  327.03    6.68   3-0.46633 0.12590 0.88087-0.64672 0.06762-0.75331
  -9   7  21  297.47    7.88   3-0.46662 0.12583 0.88091-0.60490 0.06502 0.78474
  -9   8  22   31.38   10.10   4-0.46555 0.12497 0.88075-0.56519 0.07451 0.81399
  -9   9 -19   -5.92    8.88   4-0.46570 0.13351 0.88077-0.52271 0.07325-0.84289
  -9  11 -20   38.81    9.47   4-0.46529 0.12651 0.88070-0.45081 0.07677-0.88441
  -8  -1  -7 1619.24   12.11   3-0.46580 0.16276 0.88079-0.92110 0.07231-0.35438
  -8   1 -11  795.73    9.71   3-0.46599 0.16329 0.88082-0.84261 0.07070-0.51417
  -8   2  16  455.17    8.79   3-0.46567 0.16144 0.88077-0.80147 0.07344 0.57351
  -8   3  17  570.51    7.28   3-0.46677 0.16303 0.88092-0.76262 0.06371 0.62379
  -8   4 -15  634.38    7.15   3-0.46667 0.16413 0.88091-0.72530 0.06458-0.66962
  -8   5 -16  306.19    6.70   3-0.46667 0.16417 0.88091-0.68595 0.06458-0.70991
  -8   6  20  107.54    7.39   3-0.46681 0.16367 0.88093-0.64354 0.06328 0.74592
  -8   7  21   25.08   10.01   3-0.46589 0.16248 0.88081-0.60421 0.07156 0.77842
  -8   9 -19  304.82    7.18   3-0.46638 0.16370 0.88088-0.52907 0.06718-0.83351
  -8  11 -20   42.61    9.69   3-0.46583 0.16500 0.88080-0.44968 0.07205-0.87860
  -7  -2  -3  230.77   10.83   4-0.46575 0.20109 0.88078-0.96019 0.07282-0.19309
  -7  -1  10  608.06    9.80   3-0.46594 0.20041 0.88081-0.92003 0.07110 0.33321
  -7   0  -9    0.40    6.13   3-0.46681 0.20584 0.88093-0.87848 0.06328-0.43185
  -7   1  14   43.94    7.70   3-0.46633 0.20110 0.88087-0.84169 0.06762 0.49836
  -7   2 -12  990.53    9.63   4-0.46542 0.20132 0.88072-0.80398 0.07563-0.56046
  -7   3  17   17.48    8.23   4-0.46562 0.20001 0.88076-0.76195 0.07392 0.61363
  -7   4  18  109.29    8.54   3-0.46611 0.20126 0.88084-0.72329 0.06961 0.65837
  -7   5  19    4.67    8.39   3-0.46607 0.20022 0.88083-0.68320 0.06996 0.70019
  -7   6  20   68.40    8.90   3-0.46577 0.20150 0.88079-0.64408 0.07262 0.73602
  -7   8 -18   49.90    8.44   3-0.46576 0.20259 0.88078-0.56764 0.07271-0.79883
  -7   9  22   97.29    8.29   3-0.46662 0.20247 0.88091-0.52568 0.06502 0.82467
  -7  11 -20   56.97    7.15   3-0.46681 0.20387 0.88093-0.44997 0.06328-0.87023
  -6  -1  -6 1192.28   10.30   3-0.46662 0.23934 0.88091-0.92131 0.06502-0.30640
  -6   0  12   55.05    8.02   4-0.46517 0.23776 0.88067-0.88092 0.07781 0.40585
  -6   2  15  411.64    6.59   3-0.46696 0.23907 0.88094-0.80177 0.06198 0.54498
  -6   3 -13  557.05    9.43   4-0.46561 0.23955 0.88076-0.76466 0.07402-0.59909
  -6   7 -17  126.40    8.53   3-0.46578 0.23929 0.88079-0.60761 0.07254-0.75819
  -6   8  21   61.45    7.18   3-0.46696 0.23946 0.88094-0.56517 0.06198 0.78766
  -6   9  22   12.97   10.36   4-0.46545 0.23828 0.88073-0.52558 0.07542 0.81502
  -6  10 -19   25.09    8.83   3-0.46575 0.24085 0.88078-0.48866 0.07275-0.83935
  -6  12 -20   63.80    9.84   3-0.46573 0.24110 0.88078-0.41045 0.07293-0.88014
  -5  -2   3 1604.41   19.72   4-0.46504 0.27559 0.88065-0.95945 0.07888 0.04285
  -5  -1  -5    5.34    9.88   3-0.46575 0.27737 0.88078-0.92089 0.07282-0.27331
  -5   0  11   -0.94    6.16   3-0.46672 0.27262 0.88092-0.88179 0.06415 0.38116
  -5   1  13  484.29    6.80   3-0.46672 0.27662 0.88092-0.84103 0.06415 0.46161
  -5   2  15  674.75    8.94   4-0.46520 0.27413 0.88068-0.80122 0.07756 0.52892
  -5   3  16   69.60    6.09   3-0.46667 0.27713 0.88091-0.76215 0.06458 0.58234
  -5   4 -14  192.45    6.49   3-0.46653 0.27760 0.88090-0.72558 0.06588-0.63042
  -5   5 -15   96.45    8.13   3-0.46622 0.27790 0.88086-0.68604 0.06866-0.67318
  -5   6 -16  100.58    6.20   3-0.46653 0.27839 0.88090-0.64620 0.06588-0.71137
  -5   7  20  206.69    6.85   3-0.46667 0.27719 0.88091-0.60498 0.06458 0.74437
  -5   8  21   21.97    9.40   4-0.46568 0.27609 0.88077-0.56465 0.07337 0.77586
  -5   9 -18   63.43    7.86   4-0.46541 0.27851 0.88072-0.52907 0.07576-0.80234
  -5  10  22   14.35    7.77   3-0.46681 0.27726 0.88093-0.48602 0.06328 0.82714
  -4  -1  -4  762.75   10.93   3-0.46633 0.31523 0.88087-0.92083 0.06762-0.22806
  -4   0  -7 2727.17   14.29   3-0.46613 0.31470 0.88084-0.88175 0.06944-0.35115
  -4   1  -9 4132.38   14.77   4-0.46568 0.31475 0.88077-0.84286 0.07335-0.43668
  -4   2  14  136.74    6.48   3-0.46710 0.31457 0.88095-0.80178 0.06068 0.50489
  -4   4  17  330.82    8.66   3-0.46565 0.31290 0.88077-0.72279 0.07363 0.61344
  -4   5  18  587.96    9.49   3-0.46587 0.31391 0.88080-0.68368 0.07169 0.65628
  -4   6  19   34.66    8.74   3-0.46573 0.31380 0.88078-0.64370 0.07299 0.69562
  -4   7  20  134.30    8.93   4-0.46513 0.31299 0.88067-0.60433 0.07816 0.73049
  -4   8 -17   66.25    8.43   4-0.46560 0.31525 0.88076-0.56899 0.07405-0.76025
  -4   9  21   31.42    7.28   3-0.46700 0.31517 0.88095-0.52576 0.06155 0.78818
  -4  10  22   36.68    9.67   4-0.46553 0.31411 0.88074-0.48627 0.07472 0.81363
  -4  11 -19   24.51    8.37   3-0.46603 0.31718 0.88083-0.44911 0.07028-0.83598
  -4  13 -20   83.44    7.71   3-0.46643 0.31708 0.88088-0.37045 0.06675-0.87370
  -3  -1   6  377.53   11.17   4-0.46544 0.35164 0.88073-0.91975 0.07549 0.16699
  -3   0  -6   -9.56   10.52   4-0.46584 0.35606 0.88080-0.87846 0.07195-0.31789
  -3   1  12   40.78    8.11   4-0.46522 0.35106 0.88068-0.84098 0.07736 0.40774
  -3   2 -10  465.55    9.04   4-0.46539 0.35281 0.88072-0.80366 0.07589-0.47944
  -3   3  15   38.70    6.37   3-0.46648 0.35226 0.88089-0.76225 0.06632 0.53983
  -3   4 -13  403.52    6.73   3-0.46633 0.35316 0.88087-0.72480 0.06762-0.59208
  -3   5 -14  191.36    8.51   3-0.46578 0.35345 0.88079-0.68561 0.07254-0.63700
  -3   6 -15  361.20    8.91   3-0.46585 0.35311 0.88080-0.64647 0.07189-0.67695
  -3   7 -16  318.28    6.69   3-0.46648 0.35370 0.88089-0.60738 0.06632-0.71199
  -3   8  20  478.54    7.35   3-0.46657 0.35264 0.88090-0.56518 0.06545 0.74361
  -3   9  21  117.23    9.09   4-0.46539 0.35076 0.88072-0.52576 0.07589 0.77291
  -3  10 -18   28.66    8.77   3-0.46584 0.35450 0.88080-0.48833 0.07195-0.79809
  -3  11  22   37.23   10.46   3-0.46602 0.35236 0.88083-0.44734 0.07041 0.82028
  -3  12 -19   22.85    9.38   4-0.46563 0.35434 0.88076-0.41014 0.07384-0.84103
  -3  14 -20  252.64    9.83   3-0.46622 0.35376 0.88086-0.33174 0.06862-0.87515
  -2  -1   2 1587.62   24.26   4-0.46518 0.38984 0.88068-0.91977 0.07771 0.00352
  -2   0   8  862.54    8.98   3-0.46700 0.39101 0.88095-0.88052 0.06155 0.26222
  -2   1  11  207.69    9.24   3-0.46572 0.38964 0.88078-0.84085 0.07300 0.37123
  -2   2  13   32.77    8.21   4-0.46555 0.38919 0.88075-0.80133 0.07454 0.45045
  -2   3 -11  250.53    8.88   3-0.46611 0.39062 0.88084-0.76434 0.06965-0.51325
  -2   4  16  778.31    9.26   4-0.46517 0.38800 0.88067-0.72248 0.07782 0.56910
  -2   5  17  173.13    8.75   3-0.46576 0.38923 0.88078-0.68365 0.07268 0.61443
  -2   6  18  182.76    8.86   3-0.46581 0.38964 0.88079-0.64425 0.07224 0.65542
  -2   7  19   19.30    8.79   4-0.46554 0.38936 0.88075-0.60375 0.07461 0.69311
  -2   9 -17   25.04    7.79   3-0.46609 0.39223 0.88084-0.52795 0.06976-0.75391
  -2  10  21  130.99    9.86   3-0.46601 0.39041 0.88083-0.48695 0.07049 0.77931
  -2  11 -18    6.36    8.03   4-0.46537 0.39184 0.88071-0.44895 0.07607-0.80370
  -2  12  22   38.71   10.05   3-0.46643 0.39131 0.88088-0.40719 0.06675 0.82355
  -2  13 -19  133.71    9.59   4-0.46551 0.39317 0.88074-0.37128 0.07490-0.84179
  -2  15 -20   20.16    8.03   3-0.46662 0.39437 0.88091-0.29135 0.06502-0.87213
  -1   1  10   83.06    8.87   4-0.46540 0.42691 0.88072-0.84085 0.07585 0.32767
  -1   2  12  838.19    9.70   3-0.46590 0.42743 0.88081-0.80156 0.07142 0.41382
  -1   4  15  920.88    9.38   3-0.46632 0.42809 0.88087-0.72290 0.06771 0.53894
  -1   5 -13 3247.74   11.39   3-0.46677 0.42948 0.88092-0.68552 0.06371-0.58822
  -1   6 -14 1074.44    8.29   3-0.46653 0.42951 0.88090-0.64651 0.06588-0.63094
  -1   7 -15  135.81    6.16   3-0.46677 0.43037 0.88092-0.60680 0.06371-0.66875
  -1   8  19  115.02    6.71   3-0.46648 0.42830 0.88089-0.56559 0.06632 0.70227
  -1   9  20  146.86    9.41   4-0.46558 0.42679 0.88075-0.52560 0.07424 0.73363
  -1  10 -17  281.01    8.57   4-0.46568 0.42974 0.88077-0.48904 0.07338-0.75964
  -1  11  21   81.74    9.40   3-0.46643 0.42920 0.88088-0.44700 0.06675 0.78286
  -1  12 -18   78.54    8.40   4-0.46512 0.42975 0.88066-0.40982 0.07826-0.80519
  -1  14 -19   -1.26    9.46   4-0.46570 0.43723 0.88077-0.32540 0.07325-0.83901
   0   0   3    2.42   12.57   3-0.46700 0.46683 0.88095-0.88085 0.06155 0.06002
   0   1  -5   -6.54    8.55   3-0.46643 0.47122 0.88088-0.83864 0.06675-0.27116
   0   2  11    4.87    8.82   3-0.46570 0.46524 0.88078-0.80125 0.07318 0.37143
   0   3  13    2.89    7.81   4-0.46514 0.46487 0.88067-0.76153 0.07802 0.44749
   0   4 -11    1.24    6.01   3-0.46691 0.47371 0.88094-0.71927 0.06241-0.50815
   0   5 -12    9.87    8.26   4-0.46561 0.46701 0.88076-0.68496 0.07404-0.55939
   0   8 -15   -0.12    8.01   4-0.46575 0.47381 0.88078-0.56135 0.07282-0.67897
   0   9 -16    9.55    6.05   3-0.46681 0.46906 0.88093-0.52736 0.06328-0.70893
   0  10  20   31.17    9.43   3-0.46584 0.46600 0.88080-0.48598 0.07196 0.73710
   0  11 -17   -4.20    8.89   4-0.46560 0.47473 0.88076-0.44330 0.07412-0.76089
   0  12  21    2.53    9.23   4-0.46609 0.46102 0.88084-0.40862 0.06978 0.78579
   0  13 -18  396.61    8.84   4-0.46536 0.46790 0.88071-0.37068 0.07618-0.80286
   0  15 -19   -0.76    9.21   4-0.46604 0.47482 0.88083-0.28706 0.07022-0.83252
   1   1  -3 1168.19   15.92   3-0.46643 0.50393 0.88088-0.84232 0.06675-0.18693
   1   2  -6 4215.81   17.81   4-0.46547 0.50376 0.88073-0.80284 0.07526-0.31731
   1   4 -10  235.67    6.83   3-0.46662 0.50511 0.88091-0.72478 0.06502-0.46826
   1   6  16  639.26    9.32   3-0.46568 0.50278 0.88077-0.64371 0.07338 0.57360
   1   7  17   61.97    8.31   3-0.46578 0.50296 0.88079-0.60431 0.07255 0.61488
   1   8  18   23.78    8.09   4-0.46548 0.50298 0.88073-0.56473 0.07515 0.65148
   1   9 -15  313.36    8.02   4-0.46518 0.50515 0.88068-0.52781 0.07771-0.68324
   1  10 -16  540.53    7.35   3-0.46657 0.50567 0.88090-0.48915 0.06545-0.71112
   1  11  20   30.28    9.34   3-0.46589 0.50387 0.88081-0.44703 0.07152 0.73688
   1  12 -17  190.57    9.15   4-0.46567 0.50634 0.88077-0.41000 0.07344-0.75915
   1  13  21   -0.98   10.96   4-0.46589 0.49855 0.88081-0.36974 0.07152 0.78217
   1  14 -18   78.07    9.71   3-0.46597 0.50655 0.88082-0.33037 0.07087-0.79696
   2   2   8  620.76   10.65   4-0.46558 0.54078 0.88075-0.80124 0.07430 0.24919
   2   3  -7 1020.99    9.70   3-0.46648 0.54250 0.88089-0.76383 0.06632-0.34831
   2   4  12  261.75    6.50   3-0.46696 0.54267 0.88094-0.72271 0.06198 0.42351
   2   6  15  453.93    9.00   3-0.46610 0.54161 0.88084-0.64389 0.06970 0.53683
   2   7  16  183.67    6.57   3-0.46643 0.54229 0.88088-0.60448 0.06675 0.58025
   2   8  17  118.55    8.13   3-0.46622 0.54237 0.88086-0.56533 0.06860 0.61846
   2   9  18  169.96    8.55   3-0.46566 0.54124 0.88077-0.52532 0.07357 0.65380
   2  10 -15   15.51    7.97   4-0.46517 0.54341 0.88067-0.48809 0.07777-0.68338
   2  11 -16  516.92    7.17   3-0.46686 0.54392 0.88093-0.44996 0.06285-0.70874
   2  12  20   53.02   10.13   4-0.46556 0.54123 0.88075-0.40647 0.07442 0.73394
   2  13 -17  152.31    8.43   3-0.46633 0.54402 0.88087-0.37043 0.06761-0.75339
   2  16 -18   15.11   10.41   4-0.46557 0.54395 0.88075-0.25221 0.07437-0.80087
   3   2   5 2823.05   16.86   3-0.46615 0.57982 0.88085-0.80182 0.06923 0.13305
   3   4  11  307.99    9.11   3-0.46576 0.57909 0.88078-0.72277 0.07270 0.37206
   3   5  -9   51.77    8.40   4-0.46520 0.58022 0.88068-0.68506 0.07753-0.43985
   3   6  14  107.23    8.28   3-0.46592 0.57977 0.88081-0.64462 0.07126 0.49440
   3   7  15  189.41    6.24   3-0.46672 0.58038 0.88092-0.60434 0.06415 0.54227
   3   8  16  370.05    6.67   3-0.46672 0.58030 0.88092-0.56516 0.06415 0.58314
   3   9  17  209.42    8.25   3-0.46622 0.58022 0.88086-0.52575 0.06865 0.61906
   3  10  18   20.02    8.57   4-0.46546 0.57897 0.88073-0.48550 0.07532 0.65232
   3  11 -15  258.28    8.76   4-0.46568 0.58129 0.88077-0.44942 0.07337-0.67869
   3  12  19   28.01    8.84   3-0.46619 0.58115 0.88085-0.40671 0.06887 0.70256
   3  13 -16   92.33    8.33   4-0.46494 0.58130 0.88063-0.36987 0.07975-0.72523
   3  14  20  171.16   10.00   3-0.46643 0.58129 0.88088-0.32900 0.06675 0.74227
   3  15 -17   17.90    9.32   4-0.46562 0.58163 0.88076-0.29142 0.07394-0.75998
   4   4   9  501.43    7.56   3-0.46696 0.61847 0.88094-0.72281 0.06198 0.30217
   4   5  11  321.77    6.84   3-0.46691 0.61845 0.88094-0.68344 0.06241 0.38285
   4   6  13  238.67    8.62   4-0.46546 0.61609 0.88073-0.64334 0.07531 0.45016
   4   7  14  314.46    8.24   3-0.46632 0.61802 0.88087-0.60472 0.06770 0.49848
   4   8  15   30.08    5.86   3-0.46672 0.61906 0.88092-0.56522 0.06415 0.54172
   4   9  16   62.27    5.83   3-0.46653 0.61817 0.88090-0.52530 0.06588 0.58155
   4  10  17  420.45    9.23   3-0.46580 0.61734 0.88079-0.48654 0.07231 0.61527
   4  12 -15   42.71    6.37   3-0.46672 0.62074 0.88092-0.40945 0.06415-0.66895
   4  13  19   63.17    9.91   4-0.46558 0.61711 0.88075-0.36778 0.07423 0.69339
   4  14 -16  132.25    8.55   3-0.46653 0.62031 0.88090-0.33097 0.06588-0.71156
   4  15  20   45.44   10.56   4-0.46531 0.61667 0.88070-0.28903 0.07660 0.73037
   4  17 -17   34.51   10.20   3-0.46596 0.62031 0.88082-0.21230 0.07092-0.75563
   4  18 -17  119.31   10.39   4-0.46487 0.61958 0.88061-0.17351 0.08036-0.76609
   5   4   7  293.55   10.39   3-0.46581 0.65511 0.88079-0.72315 0.07225 0.21059
   5   5  -6  296.16   10.10   4-0.46554 0.65574 0.88075-0.68471 0.07457-0.31604
   5   6  -8  101.97    8.32   3-0.46644 0.65636 0.88089-0.64577 0.06661-0.38893
   5   7  13  393.07    8.81   4-0.46552 0.65428 0.88074-0.60398 0.07477 0.45083
   5   8  14  191.48    8.23   3-0.46610 0.65587 0.88084-0.56522 0.06970 0.49652
   5   9  15  166.14    8.15   3-0.46618 0.65614 0.88085-0.52577 0.06899 0.53787
   5  10  16   85.92    8.86   3-0.46579 0.65604 0.88079-0.48618 0.07239 0.57411
   5  12 -14  179.34    8.11   3-0.46627 0.65737 0.88086-0.40952 0.06820-0.63284
   5  13  18  147.46    9.53   3-0.46585 0.65611 0.88080-0.36819 0.07186 0.65634
   5  14 -15    0.34    8.68   4-0.46570 0.65683 0.88077-0.33051 0.07325-0.67815
   5  15  19  183.02   10.98   3-0.46573 0.65600 0.88078-0.28935 0.07292 0.69510
   5  17 -16   14.02    9.15   4-0.46509 0.65690 0.88066-0.21240 0.07845-0.72397
   6   5   7   39.06    6.48   3-0.46662 0.69415 0.88091-0.68383 0.06502 0.21676
   6   6  -6   41.99    8.36   4-0.46526 0.69424 0.88069-0.64451 0.07702-0.31836
   6   9  14  106.13    7.96   4-0.46553 0.69248 0.88074-0.52472 0.07469 0.49134
   6  10  15   29.89    8.01   4-0.46529 0.69311 0.88070-0.48597 0.07678 0.52897
   6  11 -12   37.73    7.97   4-0.46512 0.69533 0.88066-0.44806 0.07825-0.56192
   6  12 -13  273.84    8.48   3-0.46658 0.69546 0.88090-0.40998 0.06541-0.59026
   6  13  17  144.29    9.50   3-0.46590 0.69410 0.88081-0.36819 0.07147 0.61602
   6  14 -14   94.47    8.81   4-0.46568 0.69593 0.88077-0.33050 0.07341-0.63786
   6  15  18   63.81   10.09   3-0.46591 0.69489 0.88081-0.28881 0.07139 0.65645
   6  16 -15  247.75    9.38   3-0.46623 0.69526 0.88086-0.25208 0.06858-0.67356
   7   6   7  288.72    9.10   3-0.46624 0.73175 0.88086-0.64410 0.06843 0.21487
   7   7  -6 2809.91   15.27   3-0.46624 0.73216 0.88086-0.60546 0.06848-0.30990
   7   8  11  470.13    8.47   3-0.46616 0.73166 0.88085-0.56529 0.06918 0.37605
   7   9  -9  864.66   10.26   3-0.46640 0.73256 0.88088-0.52730 0.06703-0.42970
   7  10 -10  251.09    8.50   3-0.46589 0.73240 0.88081-0.48786 0.07153-0.47452
   7  11 -11 1094.20   10.16   3-0.46630 0.73273 0.88087-0.44867 0.06789-0.51146
   7  12  15   97.04    6.43   3-0.46672 0.73277 0.88092-0.40673 0.06415 0.54247
   7  13  16  144.49    8.86   4-0.46557 0.73109 0.88075-0.36762 0.07438 0.57199
   7  14 -13   59.89    8.61   3-0.46597 0.73358 0.88082-0.32970 0.07085-0.59451
   7  15  17  167.30   10.04   3-0.46578 0.73187 0.88079-0.28885 0.07253 0.61492
   7  16 -14  447.28    9.56   3-0.46637 0.73297 0.88088-0.25225 0.06733-0.63217
   8   7  -3  911.61   16.20   4-0.46407 0.76766 0.88041-0.60488 0.08705-0.20739
   8   7   7  143.97    7.94   4-0.46514 0.76744 0.88067-0.60445 0.07806 0.20557
   8   8   9   -3.12    7.81   3-0.46589 0.76913 0.88081-0.56504 0.07152 0.29263
   8   9  -7  164.38    8.57   4-0.46534 0.77005 0.88071-0.52691 0.07631-0.35832
   8  10  12  290.01    8.61   4-0.46565 0.76861 0.88077-0.48605 0.07368 0.41168
   8  11  13   36.57    8.40   3-0.46580 0.76950 0.88079-0.44644 0.07231 0.45292
   8  12  14   39.34    8.54   4-0.46546 0.76863 0.88073-0.40669 0.07534 0.49042
   8  13 -11  327.47    9.05   4-0.46549 0.77072 0.88074-0.36980 0.07507-0.51883
   8  14  15  119.38    6.64   3-0.46672 0.77133 0.88092-0.32868 0.06415 0.54226
   8  15  16  100.31    9.07   4-0.46521 0.76837 0.88068-0.28857 0.07747 0.56882
   8  16  16   16.67    7.23   3-0.46672 0.77072 0.88092-0.24971 0.06415 0.58401
   8  17 -13   30.79    9.26   4-0.46533 0.77146 0.88071-0.21155 0.07641-0.60050
   9   8   6 1790.03   12.54   4-0.46541 0.80618 0.88072-0.56466 0.07574 0.16746
   9  10  10  312.34    8.49   4-0.46567 0.80666 0.88077-0.48584 0.07349 0.33150
   9  11  11  136.37    8.01   3-0.46657 0.80831 0.88090-0.44653 0.06553 0.37940
   9  12  12  340.01    6.75   3-0.46662 0.80847 0.88091-0.40785 0.06502 0.42052
   9  13  13   71.81    8.98   3-0.46612 0.80835 0.88084-0.36778 0.06949 0.45633
   9  14  14   34.74    8.25   4-0.46533 0.80640 0.88071-0.32818 0.07646 0.48898
   9  16  15   21.28    9.35   4-0.46560 0.80708 0.88076-0.24932 0.07407 0.53286
   9  18 -12   32.98    9.60   4-0.46518 0.80959 0.88068-0.17126 0.07773-0.56191
  10   9   4  142.14    9.71   4-0.46529 0.84457 0.88070-0.52590 0.07677 0.08542
  10  10   7  564.15    9.52   3-0.46593 0.84555 0.88081-0.48656 0.07119 0.21267
  10  11   9   25.31    7.69   4-0.46561 0.84473 0.88076-0.44651 0.07396 0.28972
  10  12  10  331.21    8.40   3-0.46645 0.84643 0.88089-0.40764 0.06652 0.33811
  10  14  12  315.53    9.10   3-0.46611 0.84600 0.88084-0.32889 0.06964 0.41630
  10  15  -9  173.77   10.06   4-0.46405 0.84486 0.88041-0.28989 0.08724-0.44953
  10  15  13   71.84    8.42   4-0.46530 0.84430 0.88070-0.28861 0.07673 0.44857
  10  17  14    7.45    8.84   3-0.46559 0.84374 0.88076-0.21171 0.07417 0.49094
  10  18  14    5.97    9.35   3-0.46657 0.84666 0.88090-0.17098 0.06545 0.50191
  10  19 -11   41.64    9.72   4-0.46583 0.84700 0.88080-0.13292 0.07208-0.51521
  10  20 -11   23.19   11.18   4-0.46461 0.84621 0.88055-0.09313 0.08255-0.52526
  11  11   5    1.31    7.97   4-0.46570 0.88395 0.88077-0.44633 0.07325 0.12941
  11  13  -5  231.31   11.59   5-0.46329 0.88128 0.88019-0.36840 0.09338-0.29453
  11  13   9  154.28    8.30   4-0.46545 0.88252 0.88073-0.36766 0.07540 0.28847
  11  14  10  652.57    9.70   3-0.46568 0.88277 0.88077-0.32866 0.07338 0.33174
  11  15  -7  147.07   10.20   4-0.46404 0.88283 0.88041-0.28971 0.08729-0.36920
  11  15  11   84.15    8.20   4-0.46536 0.88232 0.88071-0.28816 0.07621 0.36872
  11  17  12  179.41    9.49   3-0.46591 0.88424 0.88081-0.21041 0.07138 0.41437
  11  19  -9   21.84   10.99   4-0.46404 0.88356 0.88041-0.13149 0.08732-0.44990
  11  19  13   56.13    9.66   4-0.46533 0.88298 0.88071-0.13158 0.07642 0.44869
  12  13   5  325.63   10.82   4-0.46492 0.92050 0.88062-0.36773 0.07994 0.12306
  12  14   7  218.33   10.00   4-0.46519 0.92048 0.88068-0.32846 0.07764 0.20608
  12  15   8   99.17    8.04   3-0.46589 0.92219 0.88081-0.28898 0.07152 0.25258
  12  16   9    5.66    8.78   4-0.46576 0.92214 0.88078-0.24937 0.07273 0.29214
  12  17  -6   92.07   11.98   4-0.46388 0.92014 0.88036-0.21074 0.08860-0.32974
  12  17  10  204.87   10.44   4-0.46518 0.92027 0.88068-0.21007 0.07771 0.32711
  12  19  -7   53.89   11.12   4-0.46446 0.92125 0.88051-0.13191 0.08385-0.36619
  12  19  11    8.16   11.00   4-0.46492 0.92057 0.88062-0.13137 0.07994 0.36570
  12  20  11   20.79   10.28   3-0.46588 0.92202 0.88080-0.09207 0.07166 0.37427
  13  15   1  190.67   17.75   7-0.45897 0.95320 0.87847-0.28782 0.12612-0.08528
  13  15   2  143.05   13.06   5-0.46268 0.95646 0.87999-0.28877 0.09831-0.01675
  13  16   5   27.96   10.09   4-0.46535 0.95946 0.88071-0.24888 0.07623 0.12558
  13  17  -2   56.28   18.52   8-0.45511 0.95003 0.87637-0.20685 0.15245-0.23278
  13  19   8    4.95   11.16   4-0.46524 0.95928 0.88069-0.13092 0.07720 0.24761
  14  20   3   56.65   14.76   5-0.46285 0.99517 0.88005-0.09176 0.09696 0.02502
  14  21   4   11.09   13.70   4-0.46399 0.99553 0.88039-0.05308 0.08768 0.07503
 -26   1  -1   14.84   13.49   5-0.46281-0.52097 0.87990-0.84373 0.09861-0.13865
 -26   1   0   38.19   16.30   7-0.45892-0.52587 0.87830-0.84257 0.12732-0.12669
 -26   2  -5   23.63   10.29   5-0.46390-0.51959 0.88024-0.80452 0.09000-0.29235
 -24   0  -1  187.43   14.52   6-0.46051-0.44837 0.87902-0.88139 0.11595-0.15639
 -24   1  -5   23.17   10.85   6-0.46202-0.44550 0.87962-0.84237 0.10466-0.30737
 -24   1  10   21.78   11.51   5-0.46288-0.44496 0.87992-0.84216 0.09807 0.30667
 -23   3 -10    1.71    9.35   4-0.46385-0.41185 0.88022-0.76643 0.09038-0.49546
 -22  -1   0   10.95   13.49   7-0.45901-0.37355 0.87834-0.92003 0.12670-0.12662
 -22  -1   6   42.95   14.24   6-0.46014-0.37276 0.87886-0.92042 0.11863 0.12388
 -22   0  -5  827.27   11.26   5-0.46371-0.37025 0.88018-0.88269 0.09146-0.29336
 -22   1  12    1.39    9.80   5-0.46369-0.37426 0.88018-0.84270 0.09167 0.38805
 -22   2  14    0.49   11.63   5-0.46276-0.37603 0.87988-0.80371 0.09903 0.46183
 -22   3 -11   94.43   10.30   4-0.46418-0.36799 0.88031-0.76429 0.08775-0.53185
 -22   4 -12   26.71    9.70   5-0.46298-0.36912 0.87995-0.72564 0.09730-0.58274
 -21   0  -6   -2.42    8.59   5-0.46366-0.33188 0.88017-0.88060 0.09189-0.34149
 -21   1  13   44.82   10.97   5-0.46248-0.33198 0.87979-0.84211 0.10118 0.42565
 -21   2 -10   58.82    9.24   5-0.46374-0.33047 0.88019-0.80462 0.09128-0.49568
 -21   4 -13  117.97    7.63   4-0.46501-0.33002 0.88052-0.72562 0.08085-0.60567
 -21   5 -14    7.54    9.68   4-0.46454-0.33092 0.88041-0.68680 0.08475-0.64887
 -20  -1  -4  266.97   10.43   5-0.46308-0.29460 0.87999-0.92121 0.09650-0.25796
 -20  -1   9   69.64    9.86   5-0.46197-0.29416 0.87960-0.92028 0.10505 0.25950
 -20   0  -7    9.13    8.11   5-0.46401-0.29332 0.88027-0.88225 0.08909-0.37109
 -20   1  -9   73.91    8.86   5-0.46393-0.29236 0.88024-0.84328 0.08976-0.45342
 -20   2  15   34.79   10.39   4-0.46406-0.29192 0.88028-0.80303 0.08869 0.51971
 -20   3 -12   37.70    9.22   5-0.46378-0.29295 0.88020-0.76490 0.09093-0.57561
 -19  -2   0    1.98   11.39   6-0.46061-0.25854 0.87906-0.95988 0.11520-0.11539
 -19  -1  -5  107.41    8.21   5-0.46372-0.25587 0.88019-0.92213 0.09140-0.29338
 -19   0  12    0.02    8.64   5-0.46393-0.26111 0.88024-0.88266 0.08973 0.39123
 -19   1  14   -0.72    9.19   5-0.46374-0.26126 0.88019-0.84295 0.09124 0.47045
 -19   2 -11   37.72    9.10   5-0.46352-0.25595 0.88012-0.80455 0.09302-0.53786
 -19   3  17   13.51    9.92   5-0.46351-0.25481 0.88012-0.76295 0.09305 0.59402
 -18  -2  -2   25.02    9.30   5-0.46321-0.21703 0.88003-0.96082 0.09544-0.17660
 -18  -2   7   95.96    9.72   5-0.46212-0.21911 0.87966-0.95936 0.10391 0.17962
 -18  -1  -6  382.00    8.93   4-0.46458-0.21777 0.88042-0.92077 0.08443-0.32637
 -18   0  -8  227.36    8.74   5-0.46336-0.21849 0.88008-0.88284 0.09427-0.41802
 -18   1 -10  343.06    9.36   5-0.46390-0.21813 0.88024-0.84308 0.08995-0.49354
 -18   2  16  178.93   10.19   4-0.46372-0.21683 0.88019-0.80196 0.09138 0.55644
 -18   3 -13    5.08    8.39   4-0.46470-0.21734 0.88045-0.76523 0.08345-0.60759
 -18   4 -14  142.24    9.61   4-0.46393-0.21699 0.88025-0.72525 0.08970-0.65490
 -18   5 -15   49.19    9.83   4-0.46388-0.21708 0.88023-0.68634 0.09010-0.69552
 -18   6 -16   -2.10    9.37   5-0.46406-0.21112 0.88028-0.64187 0.08864-0.73843
 -18   7 -17   45.75    8.34   4-0.46517-0.21556 0.88055-0.60799 0.07955-0.76530
 -17  -2  -3  141.39    9.36   5-0.46321-0.18051 0.88003-0.96015 0.09545-0.21660
 -17  -1  11   99.73    9.41   5-0.46303-0.18021 0.87997-0.92004 0.09691 0.34799
 -17   0  13   -5.01    8.61   5-0.46390-0.18546 0.88024-0.88251 0.08994 0.43205
 -17   1  15    7.78    8.57   4-0.46339-0.17848 0.88009-0.84064 0.09402 0.51104
 -17   2 -12   84.55    8.20   4-0.46449-0.17843 0.88040-0.80395 0.08515-0.56893
 -17   3 -13   68.23    8.46   5-0.46331-0.17969 0.88006-0.76467 0.09465-0.62037
 -17   6 -16  351.77    9.86   5-0.46328-0.18072 0.88005-0.64740 0.09488-0.74160
 -17   7 -17  105.73   10.40   4-0.46395-0.17921 0.88025-0.60712 0.08953-0.77523
 -16  -1  -7  124.04    8.15   4-0.46486-0.14097 0.88048-0.92116 0.08213-0.36480
 -16   0  -9   70.87    8.14   4-0.46410-0.14086 0.88029-0.88206 0.08832-0.45137
 -16   1  15   47.89    9.31   4-0.46411-0.14010 0.88029-0.84270 0.08828 0.51937
 -16   2 -12  170.14    8.83   5-0.46352-0.14205 0.88013-0.80456 0.09299-0.57812
 -16   3  18    3.19    9.31   4-0.46385-0.13803 0.88022-0.76112 0.09038 0.63323
 -16   4  19   19.09   10.69   5-0.46357-0.14183 0.88014-0.72289 0.09259 0.67575
 -16   7 -17   -5.62    9.64   5-0.46350-0.13838 0.88012-0.60218 0.09319-0.78728
 -16   8 -18    1.72    9.72   5-0.46412-0.13416 0.88030-0.56253 0.08821-0.81674
 -15  -2  -4  237.32    9.83   5-0.46271-0.10503 0.87987-0.96023 0.09937-0.26086
 -15  -1  -7   54.55    8.13   5-0.46365-0.10423 0.88016-0.92173 0.09197-0.37535
 -15   0  -9   -2.50    7.71   5-0.46303-0.10538 0.87997-0.88197 0.09686-0.46097
 -15   1 -11  114.40    8.13   4-0.46433-0.10308 0.88035-0.84264 0.08649-0.52997
 -15   3  18   52.90    9.84   4-0.46388-0.10241 0.88023-0.76273 0.09011 0.63792
 -15   4  19   30.88   10.26   4-0.46414-0.10230 0.88030-0.72352 0.08806 0.68206
 -15   5  20   44.13   11.01   4-0.46406-0.10148 0.88028-0.68424 0.08864 0.72156
 -15   8 -18   31.63   10.13   4-0.46386-0.10403 0.88022-0.56795 0.09032-0.81734
 -14  -2   9  381.40    9.05   4-0.46372-0.06704 0.88018-0.95955 0.09143 0.27284
 -14   0  14 1019.52   10.24   5-0.46300-0.06758 0.87996-0.88015 0.09715 0.46908
 -14   1 -11  685.68    9.53   5-0.46379-0.06656 0.88020-0.84304 0.09088-0.53502
 -14   2  17  206.33    8.72   5-0.46345-0.06622 0.88010-0.80114 0.09357 0.59403
 -14   3  18  130.80    9.12   4-0.46428-0.06455 0.88034-0.76317 0.08688 0.64221
 -14   4 -15  141.88    6.66   4-0.46501-0.06503 0.88052-0.72548 0.08085-0.68623
 -14   4  19  135.35    7.84   4-0.46475-0.06420 0.88046-0.72396 0.08302 0.68612
 -14   5 -16   73.04    6.82   4-0.46512-0.06442 0.88054-0.68624 0.07999-0.72551
 -14   5  20   12.90   10.07   4-0.46434-0.06618 0.88036-0.68435 0.08641 0.72546
 -14   8 -18   10.70    9.24   5-0.46331-0.06617 0.88006-0.56707 0.09470-0.82182
 -14   9 -19   44.56    8.12   4-0.46501-0.06434 0.88052-0.52892 0.08085-0.84698
 -13  -3   4  372.42   13.81   6-0.46103-0.03144 0.87924-0.99826 0.11212 0.05007
 -13  -2   9  336.75    9.22   4-0.46418-0.02841 0.88031-0.96024 0.08775 0.27677
 -13  -1  12  461.46    8.80   5-0.46337-0.02938 0.88008-0.91947 0.09423 0.39109
 -13   0  14   -2.67    8.20   5-0.46358-0.03382 0.88014-0.88134 0.09254 0.47033
 -13   1 -11   86.64    8.58   5-0.46353-0.02879 0.88013-0.84356 0.09292-0.53743
 -13   2  17  165.17    9.23   4-0.46375-0.02771 0.88019-0.80146 0.09121 0.59650
 -13   3 -14   19.46    6.45   4-0.46512-0.02629 0.88054-0.76462 0.07999-0.64497
 -13   3  18   29.99    8.73   4-0.46470-0.02564 0.88045-0.76290 0.08345 0.64514
 -13   4 -15  144.67    6.73   4-0.46465-0.02757 0.88043-0.72491 0.08388-0.68926
 -13   5 -16   37.81    6.63   4-0.46480-0.02656 0.88047-0.68588 0.08258-0.72814
 -13   5  20   33.56    7.53   4-0.46491-0.02523 0.88050-0.68435 0.08172 0.72793
 -13   6  21   99.96   10.39   4-0.46422-0.02617 0.88032-0.64489 0.08738 0.76308
 -13   9 -19    2.06    7.79   4-0.46480-0.02106 0.88047-0.52325 0.08258-0.85260
 -12  -3   4  850.57   15.10   5-0.46161 0.00699 0.87947-0.99841 0.10778 0.05438
 -12  -2   9   61.32    8.25   4-0.46434 0.01080 0.88035-0.96009 0.08645 0.27820
 -12  -1  12  393.89    8.85   5-0.46346 0.00872 0.88011-0.91953 0.09349 0.39172
 -12   0  14  199.50    8.63   5-0.46360 0.00932 0.88015-0.88023 0.09237 0.47331
 -12   1 -11   64.20    7.55   5-0.46339 0.00885 0.88009-0.84332 0.09402-0.53835
 -12   2  17   18.11    8.61   4-0.46380 0.00977 0.88021-0.80155 0.09080 0.59681
 -12   3 -14  457.86    6.68   4-0.46506 0.01044 0.88053-0.76441 0.08042-0.64556
 -12   3  18  165.83    6.99   4-0.46470 0.01098 0.88045-0.76314 0.08345 0.64515
 -12   4 -15   69.08    6.16   4-0.46460 0.01097 0.88042-0.72500 0.08432-0.68953
 -12   5 -16  208.07    6.72   4-0.46480 0.01069 0.88047-0.68610 0.08258-0.72825
 -12   5  20   29.62    7.20   4-0.46501 0.01201 0.88052-0.68386 0.08085 0.72864
 -12   6  21   -5.51    9.75   5-0.46412 0.00265 0.88030-0.64658 0.08821 0.76203
 -12   9 -19    8.67    7.26   4-0.46480 0.01046 0.88047-0.52878 0.08258-0.84933
 -11  -2   9  254.94    8.97   4-0.46396 0.04720 0.88025-0.95981 0.08945 0.27504
 -11  -1  12  246.18    8.24   5-0.46308 0.04647 0.87999-0.91955 0.09648 0.38878
 -11   0  14   -1.00    8.00   5-0.46353 0.04260 0.88013-0.88113 0.09297 0.46965
 -11   1 -11   30.33    7.86   5-0.46358 0.04733 0.88014-0.84258 0.09255-0.53734
 -11   2  17   19.41    8.41   4-0.46374 0.04779 0.88019-0.80099 0.09129 0.59561
 -11   3 -14  601.97    7.02   4-0.46532 0.04854 0.88059-0.76464 0.07825-0.64343
 -11   3  18  104.26    8.32   4-0.46449 0.04879 0.88040-0.76313 0.08515 0.64330
 -11   4 -15    6.57    6.06   4-0.46480 0.04807 0.88047-0.72509 0.08258-0.68774
 -11   4  19   59.27    6.80   4-0.46496 0.04942 0.88051-0.72382 0.08129 0.68718
 -11   5 -16  107.43    6.27   4-0.46501 0.04856 0.88052-0.68621 0.08085-0.72651
 -11   5  20   82.04    7.28   4-0.46480 0.04970 0.88047-0.68383 0.08258 0.72698
 -11   6  21   86.27   10.32   4-0.46415 0.04939 0.88031-0.64463 0.08792 0.76198
 -11   8 -18   12.50    8.40   5-0.46333 0.04705 0.88007-0.56710 0.09455-0.82293
 -11   9 -19   16.79    6.89   4-0.46501 0.04852 0.88052-0.52879 0.08085-0.84795
 -11  11 -20  183.89    9.92   4-0.46447 0.04787 0.88039-0.45008 0.08534-0.89220
 -10  -2   9  366.33    9.09   5-0.46326 0.08423 0.88005-0.95887 0.09507 0.26909
 -10   1 -11  152.03    8.23   4-0.46402 0.08556 0.88027-0.84232 0.08903-0.53285
 -10   2  17  199.94    8.48   5-0.46310 0.08456 0.87999-0.80123 0.09634 0.59106
 -10   3  18  190.64    9.12   4-0.46410 0.08633 0.88029-0.76279 0.08838 0.63964
 -10   4 -15  789.53    7.39   4-0.46532 0.08681 0.88059-0.72530 0.07825-0.68361
 -10   4  19  142.71    8.76   4-0.46452 0.08633 0.88040-0.72367 0.08493 0.68359
 -10   5  20  159.44    9.15   4-0.46438 0.08677 0.88037-0.68414 0.08605 0.72311
 -10   6  21   50.46    9.71   4-0.46387 0.08639 0.88023-0.64392 0.09025 0.75921
 -10   8 -18  336.43    9.28   5-0.46369 0.08509 0.88017-0.56853 0.09168-0.81881
 -10  11 -20   71.14    7.70   4-0.46480 0.08620 0.88047-0.45002 0.08258-0.88930
  -9  -2  -4  715.19   10.91   5-0.46390 0.12282 0.88024-0.96011 0.08999-0.25117
  -9  -1  -7 1080.37   10.91   4-0.46411 0.12296 0.88029-0.92081 0.08827-0.37047
  -9   0  -9   -6.82    8.27   5-0.46369 0.12544 0.88018-0.87864 0.09167-0.46119
  -9   1 -11  480.91    6.80   4-0.46512 0.12440 0.88054-0.84294 0.07999-0.52397
  -9   1  15    1.25    6.07   4-0.46480 0.11905 0.88047-0.84280 0.08258 0.52335
  -9   3  18   20.94    8.80   5-0.46351 0.12360 0.88012-0.76170 0.09312 0.63470
  -9   4  19  487.47    9.83   4-0.46392 0.12328 0.88024-0.72298 0.08984 0.67854
  -9   5  20   46.29    9.58   4-0.46384 0.12425 0.88022-0.68325 0.09042 0.71838
  -9   6  21   31.97    9.19   5-0.46342 0.12391 0.88009-0.64329 0.09384 0.75446
  -9   8 -18   62.18    9.01   4-0.46411 0.12433 0.88029-0.56733 0.08829-0.81454
  -8  -2   8 1539.97   12.06   5-0.46362 0.16014 0.88015-0.95883 0.09223 0.23164
  -8  -1  11  805.61    9.48   4-0.46393 0.16055 0.88024-0.91992 0.08977 0.35552
  -8   0  -9 2479.19   11.01   4-0.46522 0.16219 0.88056-0.88219 0.07912-0.44234
  -8   0  13  177.30    5.95   4-0.46480 0.16160 0.88047-0.88065 0.08258 0.44343
  -8   1  15   20.77    7.93   5-0.46375 0.16096 0.88019-0.84065 0.09121 0.51538
  -8   2 -12  412.18    8.86   4-0.46388 0.16079 0.88023-0.80295 0.09015-0.57438
  -8   7 -17  276.03    8.50   5-0.46369 0.16071 0.88018-0.60760 0.09167-0.77825
  -8   8 -18  203.66    6.73   4-0.46501 0.16220 0.88052-0.56803 0.08085-0.80729
  -8   8  22   18.41    7.88   4-0.46480 0.16328 0.88047-0.56519 0.08258 0.80764
  -8  10 -19   18.98    8.99   5-0.46385 0.16147 0.88022-0.48842 0.09039-0.85792
  -8  12 -20    8.62    9.59   5-0.46383 0.16176 0.88022-0.40953 0.09057-0.89817
  -7  -2   7   19.49    8.90   4-0.46407 0.20039 0.88028-0.95959 0.08863 0.19383
  -7  -1  -6  821.55   11.28   5-0.46354 0.19849 0.88013-0.92106 0.09289-0.33479
  -7   0  13    4.76    7.54   4-0.46376 0.20003 0.88020-0.87866 0.09106 0.43139
  -7   2  16  119.19    7.79   4-0.46444 0.20006 0.88038-0.80190 0.08561 0.56123
  -7   3 -13  322.37    8.80   4-0.46391 0.19881 0.88024-0.76396 0.08992-0.61419
  -7   4 -14   36.39    8.22   5-0.46325 0.19871 0.88004-0.72429 0.09513-0.66059
  -7   5 -15   20.35    7.92   5-0.46337 0.19871 0.88008-0.68542 0.09418-0.70087
  -7   6 -16  929.26    9.45   5-0.46378 0.19879 0.88020-0.64647 0.09093-0.73695
  -7   7 -17  389.65    6.75   4-0.46470 0.19954 0.88045-0.60698 0.08345-0.76962
  -7   7  21   19.99    7.35   4-0.46501 0.20126 0.88052-0.60475 0.08085 0.76940
  -7   8  22  148.48   10.92   4-0.46385 0.20031 0.88022-0.56563 0.09039 0.79889
  -7  10 -19   -3.63    6.62   4-0.46480 0.20662 0.88047-0.48303 0.08258-0.85118
  -7  12 -20   64.66    7.25   4-0.46480 0.20024 0.88047-0.41084 0.08258-0.88973
  -6  -2   6  413.84   10.78   5-0.46368 0.23648 0.88017-0.95898 0.09175 0.15135
  -6  -1  10 1176.14   10.75   5-0.46362 0.23595 0.88016-0.91918 0.09218 0.31242
  -6   0  -8 4183.68   15.32   4-0.46437 0.23686 0.88036-0.88133 0.08613-0.40865
  -6   1 -10 1135.04    8.43   4-0.46512 0.23779 0.88054-0.84245 0.07999-0.48346
  -6   1  14   19.12    6.05   4-0.46475 0.23933 0.88046-0.84089 0.08302 0.48330
  -6   3  17   87.44    8.47   4-0.46428 0.23773 0.88034-0.76248 0.08691 0.60002
  -6   4 -14   28.85    6.18   4-0.46491 0.23739 0.88050-0.72471 0.08172-0.64710
  -6   4  18   35.46    6.20   4-0.46491 0.23894 0.88050-0.72328 0.08172 0.64630
  -6   5 -15  546.84    7.10   4-0.46470 0.23751 0.88045-0.68516 0.08345-0.68884
  -6   5  19  384.97    7.18   4-0.46501 0.23799 0.88052-0.68411 0.08085 0.68800
  -6   6 -16   11.26    6.25   4-0.46517 0.23795 0.88055-0.64605 0.07955-0.72553
  -6   6  20   14.17    6.49   4-0.46465 0.23864 0.88043-0.64390 0.08388 0.72559
  -6   7  21   70.48    9.37   4-0.46387 0.23757 0.88023-0.60470 0.09020 0.75895
  -6   9 -18  231.58    9.06   4-0.46395 0.23702 0.88025-0.52774 0.08955-0.81594
  -6  11 -19   65.82    8.55   5-0.46341 0.23653 0.88009-0.44940 0.09385-0.86170
  -6  13 -20   23.90    9.64   5-0.46385 0.23754 0.88022-0.37015 0.09040-0.89831
  -5  -2   4  432.69   14.69   5-0.46305 0.27425 0.87998-0.95866 0.09676 0.06524
  -5  -1   9  382.64    9.87   4-0.46416 0.27499 0.88031-0.91989 0.08789 0.27613
  -5   2 -11 1531.07    8.95   4-0.46449 0.27499 0.88039-0.80263 0.08518-0.52925
  -5   4  18    5.68    8.01   5-0.46347 0.27468 0.88011-0.72194 0.09342 0.63340
  -5   5  19   -0.99    8.66   5-0.46369 0.26900 0.88018-0.68408 0.09167 0.67644
  -5   6  20  212.39    8.54   5-0.46328 0.27464 0.88005-0.64326 0.09491 0.71325
  -5   8 -17   79.37    8.15   4-0.46386 0.27493 0.88022-0.56717 0.09032-0.77656
  -5   9  22   10.56    9.38   4-0.46419 0.27618 0.88032-0.52530 0.08763 0.80372
  -5  11 -19   33.40    6.64   4-0.46480 0.27650 0.88047-0.44949 0.08258-0.84962
  -5  13 -20   63.75    7.62   4-0.46522 0.27731 0.88056-0.37173 0.07912-0.88613
  -5  14 -20  110.29   10.01   5-0.46335 0.27500 0.88007-0.33163 0.09434-0.90260
  -4  -1   8 1177.43   12.32   4-0.46389 0.31228 0.88023-0.91967 0.09008 0.23386
  -4   0  11 2398.17   12.50   4-0.46386 0.31197 0.88023-0.88003 0.09028 0.35501
  -4   1  13   62.03    8.34   4-0.46428 0.31310 0.88034-0.84105 0.08691 0.43855
  -4   3 -12  817.80    7.44   4-0.46512 0.31368 0.88054-0.76361 0.07999-0.56424
  -4   3  16   79.60    6.03   4-0.46470 0.31367 0.88045-0.76283 0.08345 0.56338
  -4   4 -13  205.41    8.44   4-0.46388 0.31231 0.88023-0.72427 0.09013-0.61471
  -4   5 -14  511.98    9.03   5-0.46362 0.31240 0.88016-0.68576 0.09219-0.65741
  -4   6 -15  554.97    9.36   5-0.46382 0.31254 0.88021-0.64618 0.09065-0.69633
  -4   7 -16  411.02    6.73   4-0.46449 0.31317 0.88039-0.60626 0.08518-0.73111
  -4   8  21   59.58    9.74   4-0.46417 0.31439 0.88031-0.56544 0.08782 0.76120
  -4  10 -18   76.99    8.71   4-0.46410 0.31309 0.88029-0.48790 0.08839-0.81496
  -4  12 -19   41.47    8.88   4-0.46389 0.31325 0.88023-0.40922 0.09009-0.85712
  -4  14 -20   51.71    7.81   4-0.46480 0.31426 0.88047-0.33130 0.08258-0.88978
  -4  15 -20   54.79    9.96   5-0.46315 0.31324 0.88001-0.29105 0.09591-0.90409
  -3  -1  -2 2160.80   22.91   5-0.46371 0.35015 0.88018-0.92023 0.09151-0.17125
  -3   0  10    0.38    9.22   4-0.46406 0.35077 0.88028-0.88021 0.08864 0.31609
  -3   1  -8 1512.60   11.89   4-0.46426 0.35043 0.88033-0.84185 0.08707-0.40970
  -3   2  14  198.54    8.46   4-0.46449 0.35105 0.88039-0.80209 0.08518 0.48063
  -3   4  17  240.45    8.79   5-0.46359 0.34993 0.88015-0.72228 0.09245 0.59454
  -3   5  18  183.02    8.93   4-0.46398 0.35054 0.88026-0.68354 0.08933 0.63840
  -3   6  19  414.48    9.24   4-0.46387 0.35043 0.88023-0.64429 0.09018 0.67811
  -3   7  20  214.13    8.77   5-0.46343 0.34990 0.88010-0.60410 0.09369 0.71446
  -3   9 -17  205.68    8.25   4-0.46416 0.35081 0.88031-0.52759 0.08788-0.77374
  -3  10  22   52.36   10.43   4-0.46386 0.35154 0.88023-0.48601 0.09027 0.79897
  -3  11 -18   15.93    7.95   5-0.46331 0.35136 0.88006-0.44860 0.09470-0.82185
  -3  13 -19  145.16   10.01   5-0.46358 0.35125 0.88014-0.37051 0.09253-0.85994
  -3  15 -20   48.59    7.95   4-0.46480 0.35261 0.88047-0.29153 0.08258-0.88929
  -2  -1   3  687.65   18.10   4-0.46419 0.38911 0.88031-0.91953 0.08766 0.03385
  -2   0   9 1182.50   10.99   5-0.46351 0.38779 0.88012-0.87972 0.09311 0.27085
  -2   1  -7  844.02   11.43   5-0.46369 0.38785 0.88018-0.84203 0.09166-0.37374
  -2   2  -9  196.01    9.22   4-0.46396 0.38871 0.88025-0.80237 0.08952-0.45214
  -2   3  15  200.88    9.09   4-0.46387 0.38805 0.88023-0.76207 0.09021 0.51590
  -2   4 -12  288.18    6.47   4-0.46449 0.38880 0.88039-0.72393 0.08518-0.56954
  -2   5 -13  273.07    9.02   5-0.46373 0.38854 0.88019-0.68513 0.09135-0.61590
  -2   6 -14  290.71    8.83   5-0.46368 0.38827 0.88017-0.64631 0.09175-0.65675
  -2   7 -15  235.84    8.40   4-0.46402 0.38832 0.88027-0.60601 0.08904-0.69414
  -2   8 -16   52.26    5.76   4-0.46512 0.39043 0.88054-0.56688 0.07999-0.72535
  -2   8  20   29.72    6.62   4-0.46465 0.39048 0.88043-0.56484 0.08388 0.72547
  -2   9  21   33.19    9.00   5-0.46352 0.38896 0.88013-0.52510 0.09299 0.75559
  -2  10 -17   26.36    8.03   5-0.46334 0.38929 0.88007-0.48715 0.09446-0.78176
  -2  11  22   53.67    9.69   4-0.46432 0.39028 0.88035-0.44658 0.08655 0.80401
  -2  14 -19   74.07    9.72   5-0.46363 0.38953 0.88016-0.33117 0.09217-0.85946
  -1   0  -3   -4.27   11.95   4-0.46522 0.43036 0.88056-0.87860 0.07912-0.20340
  -1   0   7   -0.97    7.54   4-0.46486 0.42507 0.88048-0.88084 0.08215 0.20264
  -1   1  -6  341.76   11.44   4-0.46410 0.42636 0.88029-0.84173 0.08833-0.32951
  -1   2  -8 1286.57   11.41   5-0.46334 0.42550 0.88007-0.80253 0.09446-0.41714
  -1   3 -10  543.91    7.57   4-0.46512 0.42755 0.88054-0.76341 0.07999-0.48339
  -1   3  14  107.09    6.53   4-0.46491 0.42709 0.88050-0.76192 0.08172 0.48422
  -1   5  17  292.61    8.52   5-0.46328 0.42554 0.88005-0.68230 0.09494 0.59235
  -1   6  18   81.95    8.16   5-0.46357 0.42594 0.88014-0.64321 0.09265 0.63437
  -1   9 -16  215.55    8.45   4-0.46401 0.42688 0.88027-0.52676 0.08909-0.73495
  -1  10  21   47.25    9.73   4-0.46401 0.42776 0.88027-0.48646 0.08908 0.76050
  -1  15 -19   87.00   10.12   4-0.46395 0.42726 0.88025-0.29072 0.08959-0.85612
   0   0   4 5322.86   22.55   4-0.46496 0.46519 0.88051-0.88024 0.08129 0.08070
   0   1   9   13.98    9.09   4-0.46395 0.46434 0.88025-0.84075 0.08960 0.27378
   0   2  -7   -0.07    9.90   4-0.46385 0.46406 0.88022-0.80212 0.09038-0.37431
   0   3  -9    1.74    6.12   4-0.46449 0.46447 0.88039-0.76286 0.08518-0.44875
   0   4  15    0.54    8.11   4-0.46385 0.46378 0.88022-0.72136 0.09038 0.51176
   0   5  16 1092.97    9.73   4-0.46432 0.46434 0.88035-0.68356 0.08661 0.56084
   0   6 -13    2.18    5.82   4-0.46512 0.46537 0.88054-0.64526 0.07999-0.60542
   0   6  17  -12.42    6.38   4-0.46486 0.46104 0.88048-0.64456 0.08215 0.60784
   0   7 -14   19.55    5.86   4-0.46517 0.46639 0.88055-0.60598 0.07955-0.64407
   0   7  18   73.01    6.23   4-0.46470 0.46522 0.88045-0.60514 0.08345 0.64415
   0   8  19    0.31    8.61   5-0.46396 0.45987 0.88025-0.56605 0.08951 0.68249
   0  10 -16   54.73    8.37   5-0.46358 0.46500 0.88014-0.48813 0.09250-0.73843
   0  11  21   -4.64    9.18   5-0.46406 0.45980 0.88028-0.44760 0.08864 0.76570
   0  14 -18    9.19    8.53   5-0.46331 0.46465 0.88006-0.32960 0.09470-0.82183
   0  16 -19   -3.70    7.69   4-0.46501 0.47246 0.88052-0.24668 0.08085-0.84610
   1   1   7 2143.06   13.92   4-0.46423 0.50231 0.88033-0.84059 0.08734 0.19626
   1   2  10  399.60    7.08   4-0.46465 0.50243 0.88043-0.80127 0.08388 0.32066
   1   3  -8  445.86    7.68   4-0.46491 0.50293 0.88050-0.76321 0.08172-0.40422
   1   3  12  464.02    6.81   4-0.46501 0.50275 0.88052-0.76199 0.08085 0.40481
   1   4  14  855.11    9.72   5-0.46368 0.50119 0.88017-0.72179 0.09177 0.47446
   1   5 -11  178.67    6.52   4-0.46470 0.50292 0.88045-0.68453 0.08345-0.52693
   1   5  15  104.99    6.33   4-0.46512 0.50305 0.88054-0.68324 0.07999 0.52674
   1   6 -12  475.70    9.17   5-0.46381 0.50217 0.88021-0.64539 0.09066-0.57498
   1   7 -13  905.19    9.46   5-0.46369 0.50203 0.88018-0.60599 0.09167-0.61656
   1   8 -14  108.96    8.09   4-0.46414 0.50289 0.88030-0.56623 0.08800-0.65267
   1   9  19  124.32    8.48   4-0.46458 0.50356 0.88042-0.52600 0.08444 0.68372
   1  10  20  179.80    8.73   5-0.46346 0.50168 0.88011-0.48533 0.09347 0.71458
   1  11 -16  555.68    9.41   5-0.46357 0.50241 0.88014-0.44894 0.09259-0.73875
   1  12  21    5.99   10.42   4-0.46401 0.50386 0.88027-0.40675 0.08908 0.76080
   1  13 -17   48.22    8.44   5-0.46344 0.50316 0.88010-0.36908 0.09367-0.78129
   1  15 -18    3.42    9.15   4-0.46428 0.50305 0.88034-0.29100 0.08691-0.81372
   2   1   2 1578.81   22.55   5-0.46372 0.53949 0.88018-0.84056 0.09144-0.01066
   2   1   3  666.17   17.68   5-0.46337 0.53884 0.88008-0.84058 0.09419 0.02661
   2   2  -4 3393.62   20.77   5-0.46357 0.53909 0.88014-0.80205 0.09264-0.25379
   2   3  11  236.67    9.01   4-0.46386 0.53978 0.88023-0.76188 0.09026 0.35411
   2   4  13  316.00    8.40   5-0.46328 0.53900 0.88005-0.72185 0.09492 0.43084
   2   5 -10  113.15    8.48   4-0.46446 0.54055 0.88039-0.68440 0.08546-0.48823
   2   5  14  176.17    6.48   4-0.46527 0.54101 0.88058-0.68321 0.07869 0.48763
   2   9 -14  199.87    8.46   5-0.46384 0.54059 0.88022-0.52717 0.09044-0.65520
   2  10  19   81.02    8.53   4-0.46457 0.54234 0.88041-0.48626 0.08454 0.68353
   2  11  20   18.07    9.13   5-0.46334 0.53961 0.88007-0.44590 0.09443 0.71269
   2  12 -16  145.41    8.71   4-0.46394 0.54091 0.88025-0.40857 0.08961-0.73494
   2  13  21   95.61   10.22   5-0.46351 0.54111 0.88012-0.36779 0.09309 0.75511
   2  14 -17  162.21    8.87   4-0.46420 0.54104 0.88032-0.33008 0.08755-0.77336
   2  17 -18   59.48    9.93   4-0.46418 0.54155 0.88031-0.21186 0.08775-0.81346
   3   2   6 1256.74   12.64   5-0.46367 0.57757 0.88017-0.80060 0.09180 0.15093
   3   3  -5  246.22   11.07   4-0.46438 0.57790 0.88037-0.76284 0.08605-0.28710
   3   3   9  786.15    8.34   4-0.46527 0.57891 0.88058-0.76181 0.07869 0.28584
   3   4  -7 1897.76   13.38   5-0.46333 0.57719 0.88007-0.72332 0.09452-0.37714
   3   5  13  398.93    6.68   4-0.46470 0.57829 0.88045-0.68319 0.08345 0.44276
   3  10 -14   72.25    8.44   4-0.46405 0.57855 0.88028-0.48706 0.08878-0.65379
   3  11  19   98.52    9.87   4-0.46414 0.57905 0.88030-0.44707 0.08802 0.68023
   3  13  20   51.14    9.63   4-0.46445 0.58080 0.88038-0.36737 0.08551 0.72520
   3  16 -17   32.66    9.88   5-0.46395 0.57871 0.88025-0.25099 0.08960-0.77581
   4   3   7 1119.63   11.78   4-0.46403 0.61591 0.88027-0.76160 0.08895 0.19455
   4   4  10  847.41   10.01   5-0.46368 0.61530 0.88017-0.72160 0.09176 0.31282
   4   5  12  986.18    9.86   5-0.46352 0.61488 0.88013-0.68196 0.09297 0.39245
   4   6  -9  285.81    9.23   4-0.46408 0.61601 0.88028-0.64446 0.08856-0.45157
   4  10 -13   29.93    8.31   5-0.46347 0.61765 0.88011-0.48601 0.09342-0.61770
   4  11 -14   69.35    6.06   4-0.46501 0.61769 0.88052-0.44844 0.08085-0.64553
   4  11  18   45.64    6.78   4-0.46480 0.61872 0.88047-0.44643 0.08258 0.64476
   4  12  19   39.41    8.90   5-0.46327 0.61611 0.88005-0.40675 0.09502 0.67302
   4  13 -15   46.05    8.34   5-0.46389 0.61686 0.88023-0.36860 0.09003-0.69508
   4  14  20   49.10    9.97   5-0.46348 0.61674 0.88011-0.32774 0.09333 0.71454
   4  15 -16  301.22    9.16   4-0.46443 0.61688 0.88038-0.29057 0.08569-0.73122
   5   5  10  225.73    8.57   4-0.46455 0.65438 0.88041-0.68304 0.08465 0.32000
   5   6  12  444.51    8.71   4-0.46386 0.65362 0.88023-0.64338 0.09029 0.39502
   5   7  -9 4614.94   15.95   4-0.46391 0.65389 0.88024-0.60498 0.08992-0.45290
   5  10 -12  174.84    8.46   5-0.46354 0.65418 0.88013-0.48784 0.09287-0.57721
   5  11 -13  150.80    6.36   4-0.46475 0.65554 0.88046-0.44782 0.08302-0.60740
   5  11  17   38.61    6.71   4-0.46501 0.65632 0.88052-0.44646 0.08085 0.60638
   5  12  18  130.71    9.22   4-0.46372 0.65419 0.88018-0.40667 0.09142 0.63609
   5  13 -14   -1.01    7.92   5-0.46358 0.66065 0.88014-0.36269 0.09254-0.65682
   5  14  19   31.73   10.40   4-0.46392 0.65530 0.88024-0.32758 0.08984 0.67940
   5  15 -15  614.28    9.99   5-0.46369 0.65415 0.88018-0.29122 0.09166-0.69775
   5  18 -16   21.13   10.27   4-0.46393 0.65479 0.88024-0.17206 0.08975-0.73582
   5  19 -16   26.71   10.22   5-0.46303 0.65534 0.87997-0.13166 0.09685-0.74367
   6   4   2 1591.49   19.10   5-0.46250 0.68968 0.87979-0.72210 0.10101-0.02005
   6   4   3 3812.44   22.21   5-0.46249 0.68978 0.87979-0.72194 0.10109 0.02036
   6   5   8  564.10    9.93   5-0.46365 0.69119 0.88017-0.68245 0.09195 0.23174
   6   6  10  183.19    6.14   4-0.46480 0.69238 0.88047-0.64359 0.08258 0.32184
   6   7  12   92.93    8.32   5-0.46369 0.69161 0.88018-0.60364 0.09163 0.39311
   6   8  -9  235.93    8.35   4-0.46476 0.69265 0.88046-0.56587 0.08294-0.44574
   6   8  13  150.06    6.28   4-0.46501 0.69303 0.88052-0.56495 0.08085 0.44485
   6   9 -10  252.89    8.74   4-0.46394 0.69208 0.88025-0.52627 0.08967-0.49283
   6  10 -11   93.71    7.98   4-0.46407 0.69249 0.88028-0.48640 0.08860-0.53182
   6  11  16  205.59    8.57   4-0.46470 0.69295 0.88045-0.44703 0.08345 0.56368
   6  12  17   93.81    9.30   5-0.46367 0.69197 0.88017-0.40624 0.09185 0.59503
   6  13 -13   36.24    8.06   5-0.46333 0.69318 0.88007-0.36829 0.09451-0.61901
   6  14  18   19.06    9.62   4-0.46411 0.69350 0.88029-0.32763 0.08831 0.64030
   6  15 -14   32.23    8.55   5-0.46335 0.69295 0.88007-0.28906 0.09438-0.66012
   6  17 -15    8.79    9.06   4-0.46470 0.69298 0.88045-0.21170 0.08345-0.68893
   6  18 -15  102.58    9.55   5-0.46340 0.69273 0.88009-0.17200 0.09399-0.70020
   7   5   1  252.46   15.39   6-0.46113 0.72592 0.87928-0.68237 0.11137-0.07076
   7   5   2  474.63   14.28   5-0.46309 0.72841 0.87999-0.68313 0.09640-0.01535
   7   5   3 2470.52   18.62   5-0.46307 0.72853 0.87999-0.68267 0.09656 0.02507
   7   6   8 3205.39   14.23   5-0.46345 0.72875 0.88011-0.64274 0.09354 0.23030
   7   7  10 1551.37   10.79   4-0.46403 0.72969 0.88027-0.60411 0.08896 0.31600
   7   9  13   52.18    8.73   4-0.46383 0.73029 0.88022-0.52464 0.09054 0.43460
   7  10  14  321.74    9.27   4-0.46401 0.73015 0.88027-0.48616 0.08908 0.47760
   7  11  15  208.20    8.77   4-0.46378 0.72995 0.88020-0.44614 0.09097 0.51562
   7  13 -12  341.53    8.79   5-0.46387 0.73008 0.88023-0.36870 0.09021-0.57466
   7  14  17   50.46    9.67   4-0.46386 0.73117 0.88023-0.32735 0.09027 0.59706
   7  15 -13  148.95    9.02   5-0.46355 0.73024 0.88014-0.29069 0.09274-0.61778
   7  16  18   69.21   10.71   5-0.46355 0.73126 0.88013-0.24788 0.09277 0.63439
   7  17 -14   -6.21    8.83   5-0.46430 0.73461 0.88035-0.20791 0.08670-0.64555
   7  18 -14  126.13    9.59   5-0.46331 0.73078 0.88006-0.17173 0.09470-0.66042
   8   8  -5  309.53   10.64   5-0.46224 0.76577 0.87970-0.56498 0.10297-0.30435
   8   9  11   97.39    7.85   4-0.46468 0.76875 0.88044-0.52522 0.08365 0.36140
   8  10  -8   76.08    8.50   5-0.46368 0.76813 0.88017-0.48654 0.09176-0.41459
   8  11  -9   45.32    8.13   5-0.46346 0.76837 0.88011-0.44682 0.09352-0.45689
   8  12 -10  279.96    8.80   4-0.46396 0.76794 0.88025-0.40807 0.08946-0.49263
   8  13  15   15.03    8.21   5-0.46411 0.77006 0.88029-0.36595 0.08827 0.52070
   8  14  16   74.06    8.82   5-0.46309 0.76758 0.87999-0.32691 0.09643 0.54970
   8  15 -12   24.47    8.34   4-0.46435 0.76842 0.88036-0.29040 0.08635-0.56966
   8  16  17   17.47    9.58   5-0.46320 0.76660 0.88003-0.24913 0.09557 0.59065
   8  17  17    9.36   10.20   4-0.46431 0.76992 0.88035-0.20894 0.08666 0.60198
   8  18 -13   28.34    9.64   5-0.46379 0.76884 0.88021-0.17119 0.09084-0.61580
   9   9   9 1499.04   10.86   5-0.46366 0.80486 0.88017-0.52478 0.09186 0.27252
   9  10  -6  508.83   10.94   5-0.46312 0.80463 0.88000-0.48653 0.09618-0.33808
   9  11  12  174.32    8.09   5-0.46326 0.80442 0.88005-0.44590 0.09506 0.38959
   9  12  13  416.42    8.69   5-0.46331 0.80434 0.88006-0.40640 0.09470 0.43096
   9  13  -9  156.73   10.09   5-0.46220 0.80404 0.87969-0.36772 0.10330-0.46610
   9  14 -10   66.17    7.96   4-0.46417 0.80632 0.88031-0.32832 0.08779-0.49106
   9  15  15  343.14   10.16   4-0.46376 0.80559 0.88020-0.28884 0.09108 0.51574
   9  16 -11  144.59    8.76   5-0.46374 0.80622 0.88019-0.25061 0.09129-0.53530
   9  17  16   26.97    9.63   5-0.46341 0.80632 0.88009-0.20900 0.09386 0.55224
   9  19 -12  155.94   10.38   5-0.46369 0.80626 0.88017-0.13268 0.09168-0.57622
   9  20 -12   14.65   11.24   5-0.46220 0.80426 0.87969-0.09323 0.10332-0.58674
  10   9   5   37.51    7.64   5-0.46353 0.84290 0.88013-0.52460 0.09294 0.10908
  10  10  -3   47.81   12.15   6-0.45976 0.83938 0.87869-0.48477 0.12140-0.24223
  10  10   8  188.39    8.08   5-0.46333 0.84272 0.88007-0.48496 0.09449 0.22860
  10  11  -5  273.34   10.38   5-0.46304 0.84252 0.87998-0.44680 0.09678-0.29828
  10  12  11  140.06    8.01   5-0.46336 0.84241 0.88007-0.40693 0.09432 0.35018
  10  13  12  261.33    9.02   5-0.46342 0.84278 0.88009-0.36689 0.09383 0.39134
  10  14  -8  304.14   10.43   5-0.46208 0.84177 0.87964-0.32878 0.10423-0.42697
  10  16  14   44.57    9.40   5-0.46364 0.84418 0.88016-0.24810 0.09202 0.47371
  10  17 -10  190.12    9.27   4-0.46396 0.84390 0.88025-0.21087 0.08949-0.49271
  10  18  15   25.58   11.62   5-0.46288 0.84403 0.87992-0.16915 0.09808 0.50795
  10  21 -11   17.44   10.88   4-0.46402 0.84486 0.88027-0.05282 0.08897-0.53227
  11  11   6  218.45    8.79   5-0.46364 0.88091 0.88016-0.44611 0.09205 0.15098
  11  12   8   91.07    8.33   4-0.46392 0.88215 0.88024-0.40651 0.08979 0.23340
  11  14  -6  528.24   12.30   5-0.46292 0.88044 0.87994-0.32891 0.09774-0.33982
  11  16  12   51.69    9.10   4-0.46398 0.88306 0.88026-0.24862 0.08931 0.39621
  11  17  -8  185.33   10.55   5-0.46242 0.88020 0.87977-0.21047 0.10163-0.42458
  11  18  13   54.88   10.08   5-0.46389 0.88333 0.88023-0.16936 0.09001 0.43596
  11  20  -9   18.54   10.81   5-0.46225 0.88010 0.87971-0.09274 0.10290-0.46536
  12  13   6   38.17    9.39   5-0.46268 0.91853 0.87986-0.36608 0.09963 0.14289
  12  15  -4  101.76   12.58   6-0.46053 0.91595 0.87903-0.28840 0.11581-0.27702
  12  15   9   20.76    9.31   5-0.46322 0.91853 0.88003-0.28797 0.09542 0.26796
  12  16  -5   51.44   12.01   6-0.46160 0.91722 0.87946-0.24922 0.10787-0.30928
  12  16  10   39.86    9.60   5-0.46261 0.91895 0.87983-0.24804 0.10015 0.30435
  12  18  11   14.84    9.38   4-0.46370 0.91942 0.88018-0.16995 0.09154 0.35327
  12  20  -7    8.44   11.61   5-0.46281 0.91979 0.87990-0.09161 0.09858-0.38115
  12  21  -7   31.52   13.19   6-0.46088 0.91698 0.87918-0.05218 0.11319-0.39529
  13  15   3  123.62   11.96   5-0.46232 0.95660 0.87973-0.28833 0.10236 0.01897
  13  15   4  128.50   11.67   5-0.46181 0.95514 0.87954-0.28831 0.10629 0.05592
  13  16   6  265.95   10.95   5-0.46304 0.95665 0.87998-0.24912 0.09679 0.14639
  13  17   7   97.46    8.94   4-0.46381 0.95811 0.88021-0.20965 0.09074 0.19215
  13  18  -3   99.88   15.64   7-0.45866 0.95288 0.87817-0.16926 0.12917-0.25033
  13  18   8   51.05   10.82   5-0.46361 0.95763 0.88015-0.16965 0.09231 0.23067
  13  20  -4  191.70   15.80   7-0.45932 0.95363 0.87848-0.09093 0.12453-0.28629
  13  20   9   22.29   11.87   5-0.46320 0.95877 0.88003-0.08959 0.09555 0.26871
  14  19   2   25.79   17.85   7-0.45792 0.98996 0.87780-0.12867 0.13427-0.05287
  14  20   4    5.82   12.87   5-0.46274 0.99350 0.87987-0.09228 0.09917 0.06276
  14  21   5   24.74   13.79   5-0.46154 0.99409 0.87944-0.05086 0.10834 0.09441
 -26   2  -4   -4.60   13.35   7-0.45880-0.52502 0.87807-0.80000 0.12628-0.29609
 -25   1  -3   28.11   11.82   6-0.46000-0.48536 0.87862-0.84273 0.11770-0.23957
 -25   2  -6  118.04   12.29   6-0.46141-0.48483 0.87920-0.80349 0.10732-0.35005
 -25   3  -8   81.11   10.81   5-0.46159-0.48503 0.87927-0.76431 0.10599-0.42866
 -24   0   7   11.75   13.59   7-0.45853-0.44950 0.87794-0.88106 0.12820 0.15508
 -24   2  -7   32.38   11.39   6-0.46088-0.44711 0.87899-0.80421 0.11126-0.39548
 -24   3  -9   -5.21   10.48   6-0.46159-0.44453 0.87927-0.76029 0.10600-0.47684
 -23   0  -3    1.70   10.36   6-0.46004-0.41058 0.87864-0.88156 0.11745-0.23900
 -23   0   9   -3.15   11.67   7-0.45903-0.41563 0.87818-0.88050 0.12466 0.23235
 -23   1  -6   24.55   10.62   6-0.46115-0.40936 0.87910-0.84315 0.10925-0.35276
 -23   2  -8  105.16   11.47   6-0.46092-0.40936 0.87901-0.80387 0.11098-0.43491
 -23   4 -11    1.37   10.32   6-0.46110-0.40773 0.87908-0.72139 0.10967-0.56229
 -22   0  10   41.03    9.48   5-0.46114-0.37034 0.87910-0.88144 0.10937 0.29591
 -22   1  -7  609.82   12.32   6-0.46115-0.37234 0.87910-0.84282 0.10928-0.39215
 -22   2  -9  120.45    9.45   5-0.46158-0.37072 0.87927-0.80316 0.10600-0.46931
 -22   5 -13   26.38   10.03   5-0.46182-0.37025 0.87936-0.68543 0.10423-0.62904
 -21  -1  -2   32.85   11.20   7-0.45851-0.33575 0.87793-0.91965 0.12830-0.20964
 -21  -1   8   76.90   10.64   6-0.46018-0.33445 0.87870-0.92020 0.11644 0.20747
 -21   0  11    0.03    8.85   6-0.46127-0.33884 0.87915-0.88168 0.10837 0.33051
 -21   1  -8   61.29    8.96   5-0.46181-0.33252 0.87935-0.84244 0.10430-0.42699
 -21   2  15   35.84   10.64   5-0.46123-0.33164 0.87913-0.80173 0.10868 0.49820
 -21   3 -11  124.98    9.79   6-0.46118-0.33334 0.87911-0.76461 0.10902-0.55391
 -20   0  12   59.08   10.41   6-0.46060-0.29541 0.87888-0.88073 0.11332 0.37166
 -20   1  14   27.97    9.07   6-0.46088-0.29469 0.87899-0.84140 0.11128 0.45398
 -20   2 -10   56.53   10.12   6-0.46037-0.29647 0.87878-0.80295 0.11502-0.51942
 -20   4 -13   23.51    6.97   5-0.46252-0.29350 0.87960-0.72471 0.09887-0.62528
 -20   5 -14   39.00    9.50   5-0.46200-0.29382 0.87942-0.68545 0.10282-0.66791
 -20   6 -15   35.03    8.07   5-0.46246-0.29394 0.87958-0.64629 0.09930-0.70577
 -19  -2   6  191.97   11.69   6-0.45919-0.26051 0.87826-0.95883 0.12355 0.11926
 -19  -1  10   60.42    8.38   5-0.46122-0.25706 0.87913-0.92053 0.10871 0.29595
 -19   0  -7   -5.90    9.62   6-0.46028-0.25710 0.87874-0.87828 0.11571-0.40587
 -19   1  -9   65.29    8.78   6-0.46105-0.25743 0.87906-0.84322 0.10999-0.47428
 -19   2  16   20.70    9.66   5-0.46134-0.25783 0.87918-0.80206 0.10786 0.53922
 -19   3 -12   56.81    9.29   6-0.46125-0.25747 0.87914-0.76395 0.10849-0.59354
 -19   4 -13   92.46    9.02   6-0.46049-0.25844 0.87883-0.72488 0.11417-0.64026
 -19   6 -15   23.68    9.58   6-0.46070-0.25862 0.87892-0.64575 0.11260-0.71984
 -19   7 -16   64.60   11.30   6-0.46139-0.25651 0.87920-0.60642 0.10747-0.75394
 -18  -1  11  117.67    9.45   6-0.45970-0.22149 0.87849-0.91985 0.11993 0.32495
 -18   0  13  273.00    9.48   5-0.46150-0.21959 0.87924-0.88096 0.10666 0.41983
 -18   1  15  267.39    9.86   6-0.46094-0.21976 0.87902-0.84039 0.11082 0.49585
 -18   2 -11  147.55    9.07   6-0.46108-0.22003 0.87907-0.80389 0.10977-0.55442
 -17  -2   8  581.81   10.05   5-0.46129-0.18282 0.87916-0.95958 0.10823 0.21578
 -17  -1  -6   90.89    8.23   5-0.46161-0.18161 0.87928-0.92066 0.10582-0.34803
 -17   0  -8   11.94    9.30   6-0.45980-0.18150 0.87854-0.87971 0.11915-0.44155
 -17   1 -10  106.03    8.64   5-0.46155-0.18153 0.87925-0.84209 0.10630-0.50968
 -17   3  18   46.57   10.31   5-0.46142-0.18065 0.87921-0.76241 0.10726 0.62137
 -17   4 -14   95.19    6.81   5-0.46224-0.18166 0.87951-0.72430 0.10103-0.66648
 -17   5 -15   31.67    7.18   5-0.46229-0.18079 0.87953-0.68503 0.10060-0.70697
 -16  -2  -3  236.57    9.77   6-0.45938-0.14618 0.87835-0.95954 0.12217-0.24346
 -16  -2   9  162.31    9.61   6-0.45975-0.14574 0.87851-0.95890 0.11955 0.24444
 -16   0  14  108.61    8.49   6-0.46058-0.14438 0.87887-0.88018 0.11351 0.45225
 -16   2  17  106.56    9.54   5-0.46136-0.14271 0.87919-0.80165 0.10766 0.58040
 -16   3 -13   69.60    8.35   5-0.46152-0.14340 0.87924-0.76315 0.10652-0.63141
 -16   4 -14   95.83    8.84   6-0.46116-0.14361 0.87910-0.72464 0.10921-0.67520
 -16   5 -15  280.75    9.87   6-0.46121-0.14459 0.87913-0.68541 0.10881-0.71477
 -16   6 -16  271.97    9.43   5-0.46166-0.14446 0.87930-0.64582 0.10545-0.75073
 -16   9 -18   27.58   11.00   6-0.46110-0.14420 0.87908-0.52747 0.10966-0.83806
 -15  -2   9   27.53    7.90   5-0.46176-0.10563 0.87933-0.96012 0.10470 0.25926
 -15  -1  12   77.32    8.42   5-0.46133-0.10580 0.87917-0.92011 0.10794 0.37710
 -15   0  14   -4.50    8.61   6-0.46153-0.11241 0.87925-0.88242 0.10643 0.45672
 -15   2 -12  312.19    8.46   5-0.46183-0.10653 0.87936-0.80263 0.10413-0.58812
 -15   2  17   41.00    8.86   5-0.46230-0.10412 0.87953-0.80198 0.10052 0.58792
 -15   3 -13   28.14    7.94   6-0.46071-0.10552 0.87892-0.76377 0.11253-0.63794
 -15   6 -16  254.94    9.65   6-0.46107-0.10652 0.87907-0.64633 0.10990-0.75650
 -15   7 -17  473.47    9.90   5-0.46203-0.10641 0.87943-0.60677 0.10260-0.78857
 -14  -3   4  169.23   12.47   7-0.45799-0.07204 0.87767-0.99715 0.13197 0.03030
 -14  -2  -4  696.93   11.12   6-0.46054-0.06958 0.87885-0.95937 0.11381-0.27513
 -14  -1  -7  327.29    9.03   5-0.46176-0.06866 0.87934-0.92019 0.10465-0.38679
 -14  -1  12  589.91    9.25   5-0.46223-0.06841 0.87950-0.92024 0.10106 0.38503
 -14   0  -9  744.40    9.46   5-0.46152-0.06911 0.87925-0.88095 0.10647-0.46938
 -14   1  16  430.45    9.85   6-0.46111-0.06881 0.87909-0.84042 0.10957 0.53713
 -14   2 -12  185.78    8.62   6-0.46125-0.06848 0.87914-0.80295 0.10849-0.59314
 -14   7 -17   15.55    9.29   6-0.46139-0.06781 0.87919-0.60545 0.10747-0.79372
 -14  10 -19   22.36   10.09   5-0.46165-0.06659 0.87929-0.48791 0.10551-0.87093
 -13  -1  -7  198.03    8.85   6-0.46137-0.03034 0.87919-0.92072 0.10760-0.39011
 -13   0  -9    1.56    8.06   6-0.46124-0.02893 0.87914-0.87784 0.10859-0.47905
 -13   1  16  197.86    9.17   5-0.46139-0.03009 0.87919-0.84087 0.10750 0.53979
 -13   2 -12   37.97    8.47   6-0.46093-0.02987 0.87901-0.80301 0.11093-0.59608
 -13   7 -17   72.37    9.59   6-0.46123-0.03035 0.87913-0.60634 0.10867-0.79526
 -13   8 -18   78.89    7.56   5-0.46279-0.02937 0.87969-0.56750 0.09671-0.82344
 -13  10 -19  319.96   10.54   5-0.46155-0.03079 0.87926-0.48838 0.10623-0.87259
 -12  -1  -7 1687.15   11.91   6-0.46125 0.00696 0.87914-0.92070 0.10849-0.39097
 -12   0  -9  488.23    8.71   6-0.46116 0.00723 0.87911-0.88176 0.10919-0.47237
 -12   1  16  112.92    8.78   5-0.46146 0.00817 0.87922-0.84099 0.10692 0.54019
 -12   2 -12  143.41    7.88   6-0.46084 0.00674 0.87898-0.80301 0.11155-0.59662
 -12   7 -17   10.70    8.82   6-0.46120 0.00747 0.87912-0.60559 0.10887-0.79626
 -12   8 -18   11.24    6.94   5-0.46279 0.00869 0.87969-0.56655 0.09671-0.82447
 -12  10 -19  328.35   10.27   5-0.46155 0.00714 0.87925-0.48823 0.10630-0.87311
 -11  -3   4  152.38    9.96   6-0.46011 0.04423 0.87867-0.99781 0.11695 0.04504
 -11  -2  -4  889.50   11.98   6-0.45964 0.04311 0.87846-0.95873 0.12033-0.28135
 -11  -1  -7  278.67    8.82   6-0.46144 0.04526 0.87921-0.92038 0.10712-0.38883
 -11   0  -9    3.81    7.78   5-0.46138 0.04436 0.87919-0.88088 0.10757-0.47175
 -11   1  16   47.33    8.74   5-0.46139 0.04640 0.87920-0.84072 0.10746 0.53849
 -11   2 -12   10.47    8.08   5-0.46117 0.04424 0.87911-0.80263 0.10910-0.59534
 -11   7 -17   74.81    8.77   6-0.46132 0.04578 0.87917-0.60594 0.10802-0.79460
 -11  10 -19   23.17    9.24   5-0.46156 0.04664 0.87926-0.48777 0.10618-0.87206
 -10  -3   3   92.61   12.96   7-0.45772 0.07998 0.87753-0.99646 0.13380-0.01208
 -10  -2  -4 1016.82   11.42   6-0.46132 0.08280 0.87917-0.95950 0.10802-0.26909
 -10  -1  -7  861.27    8.58   5-0.46246 0.08318 0.87958-0.92058 0.09930-0.38170
 -10  -1  12  649.05    9.50   5-0.46191 0.08322 0.87939-0.91970 0.10351 0.38221
 -10   0  -9  964.28    9.58   5-0.46195 0.08299 0.87940-0.88093 0.10326-0.46615
 -10   0  14  246.31    8.55   5-0.46222 0.08365 0.87950-0.88043 0.10116 0.46543
 -10   1  16   71.59    8.20   6-0.46081 0.08297 0.87897-0.84025 0.11176 0.53463
 -10   2 -12  426.86    8.88   5-0.46141 0.08318 0.87920-0.80236 0.10729-0.59133
 -10   6 -16  107.05    8.15   6-0.46065 0.08314 0.87890-0.64546 0.11300-0.75958
 -10   7 -17   72.03    8.26   5-0.46163 0.08398 0.87929-0.60598 0.10562-0.79134
 -10   7  22    4.82    7.92   5-0.46257 0.08480 0.87962-0.60435 0.09844 0.79145
 -10  10 -19    5.34    7.07   5-0.46212 0.08409 0.87947-0.48722 0.10189-0.86948
 -10  12 -20  288.28    8.43   5-0.46235 0.08316 0.87954-0.41103 0.10016-0.90804
  -9  -2   9 1667.93   11.96   5-0.46127 0.12045 0.87915-0.95857 0.10834 0.25578
  -9  -1  12   32.31    7.86   6-0.46087 0.12109 0.87899-0.91908 0.11138 0.37319
  -9   0  14   -3.64    8.61   6-0.46133 0.11540 0.87917-0.88120 0.10794 0.45692
  -9   2 -12  203.60    6.15   5-0.46246 0.12134 0.87958-0.80293 0.09930-0.58372
  -9   2  17  225.93    8.45   5-0.46193 0.12175 0.87940-0.80140 0.10335 0.58435
  -9   3 -13  550.00    8.99   6-0.46114 0.12089 0.87910-0.76391 0.10931-0.63406
  -9   5 -15  249.92    8.20   6-0.46064 0.12069 0.87890-0.68517 0.11306-0.71851
  -9   6 -16   78.97    8.42   6-0.46131 0.12124 0.87917-0.64574 0.10804-0.75407
  -9   7 -17   73.07    6.38   5-0.46240 0.12198 0.87956-0.60620 0.09973-0.78610
  -9   7  22   48.04    9.67   5-0.46179 0.12235 0.87935-0.60403 0.10443 0.78669
  -9  10 -19  115.57    7.10   5-0.46279 0.12239 0.87969-0.48893 0.09671-0.86387
  -9  12 -20   13.37    7.51   5-0.46279 0.12284 0.87969-0.40860 0.09671-0.90456
  -8  -2  -3  126.28   11.99   6-0.46037 0.15907 0.87878-0.95843 0.11501-0.23552
  -8   1 -10 1205.28   10.21   6-0.46070 0.15826 0.87892-0.84180 0.11260-0.51591
  -8   2  17   23.65    8.73   6-0.46104 0.15892 0.87906-0.80049 0.11009 0.57647
  -8   3 -13 1207.74    8.33   5-0.46224 0.15914 0.87951-0.76341 0.10103-0.62600
  -8   3  18  168.73    8.55   5-0.46209 0.15991 0.87945-0.76204 0.10214 0.62617
  -8   4 -14  648.67    9.06   5-0.46146 0.15844 0.87922-0.72374 0.10697-0.67167
  -8   4  19  217.56    6.79   5-0.46268 0.16035 0.87966-0.72268 0.09757 0.67114
  -8   5 -15    7.85    8.18   5-0.46150 0.15887 0.87924-0.68351 0.10662-0.71250
  -8   5  20  214.26    7.48   5-0.46257 0.16065 0.87962-0.68348 0.09844 0.71098
  -8   6 -16  201.33    6.59   5-0.46224 0.15916 0.87951-0.64548 0.10103-0.74708
  -8   6  21   -0.91    9.13   5-0.46212 0.15998 0.87947-0.64342 0.10189 0.74761
  -8   7  22   26.34   10.37   6-0.46113 0.15927 0.87909-0.60360 0.10943 0.78030
  -8   9 -18  173.64    8.69   6-0.46132 0.15863 0.87917-0.52743 0.10801-0.83475
  -8  11 -19   49.14    8.89   6-0.46098 0.15881 0.87903-0.44727 0.11056-0.88027
  -8  13 -20    4.55   10.45   6-0.46134 0.15977 0.87917-0.36892 0.10788-0.91570
  -7  -1  11    4.55    8.11   5-0.46156 0.19694 0.87926-0.91945 0.10621 0.33775
  -7   0  -8   -7.22    8.79   6-0.46136 0.19918 0.87918-0.87714 0.10773-0.43636
  -7   1 -10  594.67    7.46   5-0.46257 0.19711 0.87962-0.84191 0.09844-0.50192
  -7   1  15   88.15    8.19   5-0.46179 0.19725 0.87935-0.84078 0.10442 0.50235
  -7   3  18  134.86    8.65   6-0.46098 0.19663 0.87903-0.76085 0.11052 0.61697
  -7   4  19   43.92    8.55   5-0.46144 0.19714 0.87922-0.72237 0.10706 0.66149
  -7   5  20  109.49    9.26   5-0.46145 0.19735 0.87922-0.68297 0.10698 0.70207
  -7   6  21   49.62    9.92   6-0.46112 0.19725 0.87909-0.64255 0.10951 0.73932
  -7   9 -18  191.98    6.62   5-0.46246 0.19786 0.87958-0.52790 0.09930-0.82593
  -7  11 -19   40.65    8.56   5-0.46184 0.19716 0.87936-0.44805 0.10405-0.87201
  -7  13 -20  175.23    7.85   5-0.46235 0.19728 0.87954-0.37072 0.10016-0.90756
  -6  -1  -5 2016.08   14.50   6-0.46076 0.23420 0.87895-0.91984 0.11215-0.31316
  -6   0  13  815.58    9.03   6-0.46072 0.23368 0.87893-0.87927 0.11243 0.41266
  -6   2 -11 1677.45   10.95   5-0.46166 0.23431 0.87930-0.80193 0.10544-0.54905
  -6   2  16  307.20    6.49   5-0.46246 0.23552 0.87958-0.80143 0.09930 0.54795
  -6   8 -17  332.64    8.41   5-0.46189 0.23445 0.87938-0.56660 0.10368-0.78982
  -6   8  22   24.88    7.27   5-0.46235 0.23619 0.87954-0.56451 0.10016 0.78990
  -6  14 -20   17.58   10.74   5-0.46145 0.23553 0.87922-0.32924 0.10703-0.91435
  -5   0  -7   -0.96    9.03   6-0.46156 0.27552 0.87926-0.87666 0.10621-0.39305
  -5   0  12   -2.09    5.93   5-0.46246 0.26891 0.87958-0.88108 0.09930 0.38631
  -5   1  -9  351.14    7.37   5-0.46201 0.27269 0.87943-0.84123 0.10276-0.46589
  -5   1  14   14.11    6.16   5-0.46224 0.27369 0.87951-0.84062 0.10103 0.46504
  -5   3 -12  314.55    6.44   5-0.46224 0.27265 0.87951-0.76315 0.10103-0.58530
  -5   3  17  181.23    8.35   5-0.46212 0.27321 0.87947-0.76171 0.10189 0.58569
  -5   4 -13  382.47    9.12   6-0.46119 0.27225 0.87912-0.72409 0.10896-0.63322
  -5   5 -14  383.11    8.75   6-0.46091 0.27225 0.87900-0.68455 0.11109-0.67584
  -5   6 -15  743.80    9.67   6-0.46131 0.27250 0.87916-0.64527 0.10807-0.71338
  -5   7 -16  154.30    6.09   5-0.46224 0.27338 0.87951-0.60587 0.10103-0.74685
  -5   7  21  113.87    8.96   5-0.46207 0.27398 0.87945-0.60430 0.10233 0.74696
  -5   8  22   18.38    9.24   6-0.46105 0.27308 0.87906-0.56415 0.11003 0.77811
  -5  10 -18  120.40    6.35   5-0.46212 0.27299 0.87947-0.48764 0.10189-0.82909
  -5  12 -19    9.61    8.59   5-0.46190 0.27346 0.87939-0.40781 0.10362-0.87102
  -4   2 -10  721.28    9.99   5-0.46146 0.30994 0.87922-0.80186 0.10692-0.50984
  -4   2  15  115.01    6.03   5-0.46268 0.31143 0.87966-0.80103 0.09757 0.50895
  -4   4  18   67.34    8.60   6-0.46101 0.31007 0.87904-0.72191 0.11034 0.61684
  -4   5  19   61.66    8.65   5-0.46133 0.31068 0.87917-0.68289 0.10793 0.65955
  -4   6  20  314.14    9.45   6-0.46112 0.31014 0.87909-0.64290 0.10946 0.69890
  -4   9 -17   93.96    7.95   5-0.46168 0.31072 0.87931-0.52720 0.10527-0.79058
  -4   9  22    4.96    7.49   5-0.46235 0.31218 0.87954-0.52509 0.10016 0.79064
  -4  11 -18   78.52    8.78   6-0.46103 0.31151 0.87905-0.44850 0.11018-0.83750
  -4  13 -19   78.43    9.43   6-0.46132 0.31116 0.87917-0.36927 0.10803-0.87549
  -3  -1   7  461.88   10.87   5-0.46181 0.34837 0.87935-0.91881 0.10429 0.17893
  -3   1  13   62.09    8.61   6-0.46089 0.34788 0.87900-0.84009 0.11121 0.41316
  -3   3 -11  734.95    7.53   5-0.46246 0.34879 0.87958-0.76292 0.09930-0.54328
  -3   3  16  427.77    8.63   5-0.46201 0.34864 0.87943-0.76129 0.10276 0.54448
  -3   4 -12 1301.88    9.83   6-0.46089 0.34775 0.87900-0.72377 0.11117-0.59515
  -3   7 -15  176.56    8.85   6-0.46113 0.34832 0.87909-0.60605 0.10943-0.71457
  -3   8 -16  398.19    6.76   5-0.46235 0.34889 0.87954-0.56637 0.10016-0.74618
  -3   8  21  114.14    9.15   5-0.46190 0.34983 0.87939-0.56467 0.10362 0.74620
  -3   9  22  101.72    9.46   6-0.46059 0.34804 0.87887-0.52447 0.11345 0.77588
  -3  14 -19   54.03    9.86   6-0.46120 0.34974 0.87912-0.32941 0.10892-0.87678
  -2  -1   4  989.66   13.25   5-0.46218 0.38691 0.87949-0.91878 0.10146 0.06047
  -2   1  12  340.40    8.88   5-0.46137 0.38589 0.87919-0.84015 0.10762 0.37758
  -2   2  14  531.52    9.54   6-0.46118 0.38533 0.87911-0.80025 0.10906 0.45660
  -2   5  18   88.90    8.61   5-0.46124 0.38650 0.87914-0.68220 0.10856 0.61873
  -2   6  19  102.17    8.95   5-0.46128 0.38614 0.87915-0.64309 0.10833 0.65957
  -2   7  20    5.04    8.57   5-0.46133 0.38614 0.87917-0.60316 0.10794 0.69636
  -2   9 -16  441.13    8.89   6-0.46101 0.38624 0.87905-0.52733 0.11030-0.75626
  -2  10  22   20.00   10.12   5-0.46146 0.38704 0.87922-0.48496 0.10695 0.78309
  -2  12 -18   54.18    6.79   5-0.46257 0.38890 0.87962-0.40844 0.09844-0.82541
  -2  15 -19   55.16   10.14   5-0.46139 0.38742 0.87920-0.28956 0.10745-0.87498
  -1   0   8    5.13    9.81   6-0.46104 0.42327 0.87906-0.87891 0.11010 0.21347
  -1   1  11  842.46   10.14   6-0.46123 0.42346 0.87913-0.83969 0.10865 0.33584
  -1   2  13  568.42    9.17   5-0.46158 0.42414 0.87927-0.80071 0.10601 0.41973
  -1   4 -11 1411.95    8.89   5-0.46246 0.42456 0.87958-0.72317 0.09930-0.54340
  -1   4  16 1065.89    9.59   5-0.46200 0.42435 0.87942-0.72177 0.10287 0.54437
  -1   5 -12 1768.38   10.89   6-0.46129 0.42377 0.87915-0.68415 0.10825-0.59245
  -1   6 -13   50.42    8.14   6-0.46096 0.42392 0.87903-0.64438 0.11066-0.63547
  -1   7 -14  755.09    9.38   6-0.46131 0.42397 0.87917-0.60532 0.10805-0.67282
  -1   7  19   76.79    6.62   5-0.46279 0.42611 0.87969-0.60431 0.09671 0.67151
  -1   8 -15  102.30    6.02   5-0.46235 0.42534 0.87954-0.56563 0.10016-0.70575
  -1   8  20  327.48    8.78   5-0.46194 0.42498 0.87940-0.56477 0.10331 0.70587
  -1   9  21  142.89    9.22   6-0.46089 0.42371 0.87900-0.52444 0.11118 0.73717
  -1  11 -17   58.49    6.04   5-0.46246 0.42537 0.87958-0.44793 0.09930-0.78587
  -1  11  22  196.84   10.10   5-0.46186 0.42565 0.87937-0.44631 0.10395 0.78607
  -1  13 -18   67.74    7.02   5-0.46257 0.42672 0.87962-0.36863 0.09844-0.82542
  -1  16 -19   14.30    9.67   5-0.46208 0.42562 0.87945-0.25006 0.10223-0.86936
   0   0   5   -2.07    8.93   5-0.46212 0.46104 0.87947-0.87979 0.10189 0.10267
   0   2  12  955.51    9.90   5-0.46145 0.46168 0.87922-0.80038 0.10700 0.37857
   0   3  14 3366.65   12.77   6-0.46085 0.46086 0.87898-0.76065 0.11151 0.45404
   0   4 -10  721.49   10.31   6-0.46114 0.46136 0.87910-0.72320 0.10933-0.51228
   0   9 -15    3.63    8.13   6-0.46127 0.46198 0.87915-0.52525 0.10837-0.71383
   0   9  20  179.13    7.11   5-0.46274 0.46412 0.87968-0.52524 0.09714 0.71175
   0  10  21    3.80    9.51   6-0.46127 0.45666 0.87915-0.48662 0.10837 0.74343
   0  12 -17   -0.47    6.03   5-0.46246 0.47001 0.87958-0.40181 0.09930-0.78533
   0  12  22   78.70   10.42   5-0.46190 0.46379 0.87939-0.40673 0.10362 0.78602
   0  15 -18  231.46   10.06   6-0.46101 0.46272 0.87905-0.29062 0.11028-0.83711
   1   6  17   62.40    8.77   5-0.46125 0.50000 0.87914-0.64264 0.10855 0.57823
   1   7  18  857.40    9.78   5-0.46129 0.49954 0.87915-0.60336 0.10825 0.61959
   1   8  19   98.12    8.46   6-0.46087 0.49986 0.87899-0.56304 0.11136 0.65631
   1  10 -15  195.72    8.30   6-0.46113 0.50019 0.87910-0.48744 0.10938-0.71485
   1  11  21   99.38   10.03   5-0.46130 0.50064 0.87916-0.44572 0.10816 0.74081
   1  14 -17   55.95    8.65   6-0.46058 0.50093 0.87887-0.32850 0.11347-0.80019
   1  16 -18   47.87    7.49   5-0.46229 0.50249 0.87953-0.25002 0.10060-0.82722
   1  17 -18   70.85   10.17   6-0.46081 0.50165 0.87896-0.21168 0.11183-0.83840
   2   1   4  974.95   16.05   5-0.46144 0.53728 0.87921-0.83984 0.10710 0.05392
   2   2   9  202.95    9.30   5-0.46172 0.53779 0.87932-0.80056 0.10500 0.25827
   2   4  -8 1235.30   12.13   6-0.46098 0.53687 0.87904-0.72283 0.11052-0.43257
   2   5  15  426.77    8.79   6-0.46073 0.53675 0.87893-0.68207 0.11239 0.49372
   2   6 -11  596.86    7.25   5-0.46268 0.53866 0.87966-0.64404 0.09757-0.54147
   2   6  16  114.02    8.38   5-0.46172 0.53826 0.87932-0.64331 0.10498 0.54188
   2   7 -12  552.86    6.88   5-0.46224 0.53808 0.87951-0.60474 0.10103-0.58570
   2   7  17   43.16    7.92   5-0.46207 0.53912 0.87945-0.60367 0.10233 0.58504
   2   8 -13  621.51    7.28   5-0.46263 0.53890 0.87964-0.56583 0.09800-0.62276
   2   8  18   16.14    8.01   5-0.46178 0.53962 0.87934-0.56349 0.10449 0.62353
   2   9  19  121.00    9.02   6-0.46113 0.53817 0.87909-0.52418 0.10943 0.65824
   2  11 -15   88.54    8.50   6-0.46131 0.53834 0.87916-0.44757 0.10810-0.71318
   2  12  21   27.24    9.63   6-0.46094 0.53802 0.87902-0.40595 0.11085 0.73752
   2  13 -16   13.66    8.58   6-0.46086 0.53806 0.87899-0.36750 0.11140-0.75789
   2  15 -17   66.51    8.69   5-0.46173 0.53903 0.87932-0.28981 0.10491-0.79031
   3   3  10 1399.54   11.38   6-0.46130 0.57509 0.87916-0.76055 0.10818 0.29595
   3   4  12 1293.63   10.32   5-0.46171 0.57580 0.87932-0.72139 0.10505 0.38063
   3   6 -10  471.86    7.21   5-0.46279 0.57695 0.87969-0.64413 0.09671-0.50015
   3   6  15  376.16    8.71   5-0.46173 0.57596 0.87932-0.64307 0.10488 0.50181
   3   7 -11 1047.05    9.86   5-0.46159 0.57538 0.87927-0.60412 0.10600-0.54961
   3   7  16  307.18    6.48   5-0.46246 0.57690 0.87958-0.60347 0.09930 0.54794
   3   8 -12  955.12    9.53   5-0.46163 0.57556 0.87928-0.56500 0.10569-0.58970
   3   8  17   91.68    6.22   5-0.46246 0.57706 0.87958-0.56378 0.09930 0.58868
   3   9 -13  834.53    7.61   5-0.46252 0.57672 0.87960-0.52605 0.09887-0.62372
   3   9  18  334.89    8.72   5-0.46185 0.57661 0.87937-0.52482 0.10398 0.62422
   3  10  19  155.46    8.85   6-0.46092 0.57554 0.87901-0.48462 0.11095 0.65700
   3  12 -15  223.64    6.76   5-0.46224 0.57683 0.87951-0.40799 0.10103-0.70677
   3  12  20   35.56    9.21   5-0.46212 0.57795 0.87947-0.40592 0.10189 0.70664
   3  14 -16  399.92    7.30   5-0.46224 0.57645 0.87951-0.32945 0.10103-0.74707
   3  17 -17   77.81    9.84   5-0.46203 0.57729 0.87943-0.21092 0.10265-0.78835
   3  18 -17    0.61    9.97   5-0.46133 0.57798 0.87917-0.16798 0.10794-0.79816
   4   5  -7  731.77   10.75   6-0.46065 0.61228 0.87890-0.68327 0.11296-0.39471
   4   6  14  366.99    8.59   6-0.46119 0.61321 0.87912-0.64211 0.10894 0.45678
   4   7 -10   95.84    7.93   5-0.46208 0.61441 0.87945-0.60400 0.10223-0.50554
   4   7  15    5.40    5.79   5-0.46218 0.61473 0.87949-0.60295 0.10146 0.50565
   4   8 -11   58.31    7.95   5-0.46153 0.61403 0.87925-0.56424 0.10643-0.55014
   4   8  16  100.93    6.06   5-0.46246 0.61561 0.87958-0.56426 0.09930 0.54766
   4   9 -12  239.05    7.95   5-0.46195 0.61390 0.87940-0.52545 0.10324-0.58756
   4   9  17   99.02    6.23   5-0.46224 0.61522 0.87951-0.52454 0.10103 0.58637
   4  10  18   70.20    9.01   5-0.46138 0.61454 0.87919-0.48508 0.10757 0.62024
   4  12 -14   14.80    8.47   6-0.46114 0.61453 0.87910-0.40698 0.10938-0.67477
   4  13  20   67.67    9.71   6-0.46105 0.61399 0.87906-0.36686 0.11004 0.69762
   4  14 -15  327.24    9.28   6-0.46091 0.61381 0.87901-0.32941 0.11105-0.71663
   4  16 -16   43.01    9.10   5-0.46207 0.61523 0.87945-0.24973 0.10233-0.74711
   4  17 -16   35.71    9.14   6-0.46071 0.61526 0.87893-0.20893 0.11251-0.75959
   5   4  -3 3165.79   22.16   6-0.46118 0.65031 0.87911-0.72211 0.10906-0.22960
   5   4   8   27.08    6.31   5-0.46252 0.65266 0.87960-0.72178 0.09887 0.22292
   5   5  11 1320.74   10.15   6-0.46065 0.65004 0.87890-0.68145 0.11301 0.33137
   5   7  14  191.17    8.21   5-0.46124 0.65128 0.87914-0.60300 0.10858 0.45743
   5   8 -10  136.36    5.92   5-0.46246 0.65265 0.87958-0.56488 0.09930-0.50281
   5   8  15 1557.50   10.01   5-0.46190 0.65221 0.87939-0.56411 0.10362 0.50359
   5   9 -11  368.29    6.72   5-0.46235 0.65224 0.87954-0.52572 0.10016-0.54426
   5   9  16  180.68    8.02   5-0.46196 0.65274 0.87941-0.52448 0.10317 0.54426
   5  10  17   74.39    9.19   5-0.46145 0.65222 0.87922-0.48502 0.10700 0.58046
   5  12 -13  456.79    8.82   6-0.46048 0.65110 0.87883-0.40783 0.11424-0.63890
   5  13  19  379.16   10.58   5-0.46144 0.65258 0.87921-0.36736 0.10709 0.66134
   5  16 -15  364.71    9.90   6-0.46120 0.65211 0.87912-0.25070 0.10889-0.71476
   6   4   1 3633.13   30.90   7-0.45872 0.68592 0.87803-0.72028 0.12684-0.08642
   6   4   4   55.98    9.46   6-0.46118 0.68863 0.87911-0.72104 0.10907 0.05008
   6   6  11  196.19    7.97   6-0.46090 0.68809 0.87900-0.64223 0.11115 0.33292
   6   8  14    3.24    7.81   6-0.46076 0.68875 0.87894-0.56284 0.11218 0.45380
   6   9  15  199.05    8.74   6-0.46123 0.68907 0.87913-0.52422 0.10864 0.49765
   6  10  16   48.38    8.85   6-0.46099 0.69042 0.87904-0.48327 0.11047 0.53597
   6  12 -12   66.04    8.00   6-0.46056 0.68950 0.87886-0.40717 0.11364-0.59760
   6  13  18  103.68    9.88   5-0.46150 0.69075 0.87924-0.36690 0.10667 0.62158
   6  15  19   39.86   10.93   5-0.46140 0.69142 0.87920-0.28728 0.10739 0.66180
   6  16 -14   -4.30    8.59   6-0.46092 0.69655 0.87901-0.24293 0.11097-0.67431
   6  19 -15   22.88   10.28   6-0.46154 0.69018 0.87925-0.13107 0.10632-0.71117
   7   5   4  937.29   12.13   5-0.46142 0.72688 0.87921-0.68213 0.10727 0.05449
   7   6  -3  610.98   15.21   6-0.45894 0.72414 0.87814-0.64202 0.12532-0.24595
   7   8  -7  500.60    9.44   5-0.46161 0.72708 0.87928-0.56442 0.10581-0.38765
   7   8  12   63.91    5.60   5-0.46235 0.72848 0.87954-0.56398 0.10016 0.38501
   7  12 -11  123.56    8.24   6-0.46144 0.72773 0.87921-0.40710 0.10709-0.55034
   7  12  16  155.43    6.64   5-0.46246 0.72955 0.87958-0.40643 0.09930 0.54808
   7  13  17   87.99    9.60   6-0.46119 0.72833 0.87912-0.36541 0.10895 0.57798
   7  15  18  103.23   10.79   5-0.46134 0.72930 0.87918-0.28686 0.10783 0.61995
   7  16 -13   21.35    8.57   6-0.46057 0.72782 0.87887-0.24818 0.11356-0.63836
   7  19 -14   10.00   10.11   5-0.46150 0.72863 0.87924-0.13060 0.10661-0.67178
   7  20 -14   26.07    9.99   6-0.46062 0.72870 0.87889-0.09074 0.11317-0.67835
   8   6   2  955.71   14.97   6-0.46023 0.76345 0.87872-0.64237 0.11608-0.03510
   8   6   3   35.53    8.40   6-0.46109 0.76370 0.87908-0.64291 0.10971 0.01098
   8   6   4  156.97   10.15   6-0.46005 0.76301 0.87864-0.64231 0.11737 0.04390
   8   7   8  182.81    8.41   5-0.46150 0.76526 0.87924-0.60356 0.10663 0.21643
   8   8  10   27.89    7.45   5-0.46199 0.76718 0.87942-0.56337 0.10296 0.30159
   8   9  12  530.09    8.87   6-0.46079 0.76395 0.87896-0.52381 0.11198 0.37298
   8  10  13   80.40    8.28   5-0.46148 0.76616 0.87923-0.48477 0.10681 0.41870
   8  11  14   25.55    8.58   5-0.46150 0.76693 0.87924-0.44457 0.10666 0.46011
   8  12  15  579.41    9.71   6-0.46121 0.76496 0.87912-0.40612 0.10886 0.49766
   8  14 -11  152.48    8.55   6-0.46133 0.76567 0.87917-0.32829 0.10796-0.55171
   8  15  17    1.49    9.30   6-0.46098 0.75993 0.87903-0.28915 0.11053 0.58083
   8  16 -12  158.91    8.87   6-0.46139 0.76564 0.87920-0.25002 0.10743-0.59163
   8  19 -13   26.15    9.18   5-0.46170 0.76613 0.87931-0.13144 0.10512-0.62847
   8  20 -13    5.16   10.50   6-0.46098 0.76632 0.87903-0.09110 0.11053-0.63547
   9   8   7 1742.35   12.06   5-0.46191 0.80394 0.87939-0.56402 0.10355 0.18002
   9   9  -4    9.54   11.06   7-0.45871 0.80045 0.87803-0.52311 0.12696-0.28806
   9  10  11  362.69    8.65   5-0.46167 0.80387 0.87930-0.48528 0.10534 0.33987
   9  11  -7  243.06    9.07   6-0.46111 0.80294 0.87909-0.44644 0.10958-0.39207
   9  12  -8   39.50    8.21   6-0.46110 0.80387 0.87908-0.40610 0.10967-0.43220
   9  13  14  139.29    8.45   5-0.46207 0.80490 0.87945-0.36677 0.10230 0.46424
   9  14  15  259.66    9.21   6-0.46105 0.80296 0.87906-0.32680 0.11000 0.49660
   9  15 -10   46.79    9.44   6-0.45994 0.80195 0.87859-0.28801 0.11820-0.52194
   9  16  16  155.87   10.63   5-0.46128 0.80423 0.87915-0.24823 0.10828 0.53874
   9  17 -11  294.52    9.75   6-0.46090 0.80356 0.87900-0.21060 0.11116-0.55566
  10   9   6 1128.72   11.31   6-0.46089 0.83976 0.87900-0.52393 0.11121 0.13147
  10  11  10  127.77    8.17   5-0.46167 0.84200 0.87930-0.44550 0.10534 0.29989
  10  12  -6  906.19   12.40   6-0.46039 0.83985 0.87879-0.40636 0.11493-0.35682
  10  13  -7   32.94    9.76   6-0.46046 0.84034 0.87882-0.36674 0.11439-0.39666
  10  14  13   24.28    8.50   5-0.46218 0.84338 0.87949-0.32677 0.10146 0.42429
  10  15  14   43.93    9.23   6-0.46109 0.84164 0.87908-0.28650 0.10975 0.45596
  10  16  -9   88.11    9.78   6-0.45990 0.83970 0.87858-0.24924 0.11848-0.48101
  10  17  15   19.84    9.89   5-0.46118 0.84126 0.87911-0.20816 0.10902 0.49779
  10  18 -10    6.22    9.21   5-0.46153 0.84262 0.87925-0.16942 0.10642-0.51014
  11  11   7  233.90   10.23   6-0.46048 0.87791 0.87883-0.44503 0.11421 0.16894
  11  12   9  163.39    9.29   6-0.46059 0.87772 0.87888-0.40551 0.11339 0.25040
  11  13  10  134.85    8.51   5-0.46151 0.87999 0.87924-0.36661 0.10659 0.29832
  11  14  11   12.92    8.52   5-0.46156 0.88093 0.87926-0.32625 0.10618 0.33992
  11  15  12  336.33    9.40   5-0.46122 0.87948 0.87913-0.28796 0.10876 0.37667
  11  17  13   77.32    9.91   5-0.46176 0.88203 0.87934-0.20856 0.10465 0.42110
  11  21  -9   -3.22   10.20   6-0.46133 0.88402 0.87917-0.04841 0.10794-0.46443
  12  14   8   12.37    7.90   6-0.46149 0.91876 0.87923-0.32616 0.10675 0.21785
  12  17  11   34.88    9.13   5-0.46126 0.91767 0.87914-0.20821 0.10848 0.33658
  12  18  -6  260.11   11.92   6-0.45970 0.91589 0.87849-0.16959 0.11991-0.36230
  12  19  12   12.52   10.31   6-0.46103 0.91731 0.87905-0.12921 0.11017 0.37569
  13  15   5   25.63    9.37   6-0.45979 0.95339 0.87853-0.28683 0.11924 0.08329
  13  16   7  117.45   10.21   6-0.46009 0.95361 0.87866-0.24778 0.11709 0.16627
  13  17   8  328.24   11.41   6-0.46061 0.95432 0.87888-0.20866 0.11329 0.21074
  13  18   9   94.20   11.19   6-0.45998 0.95373 0.87862-0.16909 0.11785 0.24651
  13  19   9   14.36    9.66   5-0.46155 0.95683 0.87926-0.12914 0.10625 0.25890
  13  21  -4    2.21   14.94   8-0.45605 0.95058 0.87663-0.04964 0.14503-0.30573
  14  19   3   89.03   14.70   7-0.45882 0.99120 0.87808-0.12898 0.12617-0.00420
  14  19   4  153.41   14.71   6-0.45875 0.99056 0.87805-0.12901 0.12666 0.03596
  14  20   5   17.67   12.94   7-0.45899 0.99269 0.87816-0.08870 0.12494 0.07832
  14  21   6    4.45   13.78   6-0.45934 0.99123 0.87833-0.05069 0.12245 0.12087
 -26   1   1   12.77   16.76   9-0.45198-0.53165 0.87306-0.83832 0.17551-0.13483
 -24   0   0   11.81   13.29   8-0.45565-0.45321 0.87540-0.88010 0.15272-0.15278
 -24   1  -4  396.61   12.11   7-0.45756-0.45223 0.87649-0.84131 0.14017-0.30202
 -24   1  11    4.03   13.28   8-0.45700-0.45159 0.87618-0.84086 0.14390 0.30175
 -24   4 -10   31.45   11.06   6-0.45996-0.44724 0.87769-0.72426 0.12362-0.52817
 -23   1  12   21.18   11.79   7-0.45908-0.41014 0.87727-0.84090 0.12977 0.35543
 -22  -1   1  114.03   15.55   9-0.45253-0.38057 0.87344-0.91684 0.17219-0.13210
 -22  -1   7  609.56   16.17   8-0.45574-0.37775 0.87546-0.91783 0.15215 0.13074
 -22   0  -4   88.21   10.14   7-0.45829-0.37386 0.87687-0.88040 0.13521-0.29708
 -22   1  13   43.46   11.66   7-0.45889-0.37315 0.87718-0.84033 0.13109 0.39492
 -22   3 -10  113.22    9.95   7-0.45960-0.37210 0.87752-0.76323 0.12617-0.53129
 -21   0  -5    6.59    9.68   7-0.45806-0.33599 0.87675-0.88019 0.13681-0.33964
 -21   2  -9   14.40    8.60   7-0.45843-0.33444 0.87694-0.80143 0.13431-0.49893
 -21   4 -12   30.46   10.13   6-0.46035-0.33311 0.87787-0.72421 0.12082-0.60627
 -21   5 -13   36.01   10.56   7-0.45982-0.33341 0.87763-0.68444 0.12463-0.65064
 -21   6 -14   16.92   10.78   7-0.45973-0.33232 0.87759-0.64451 0.12526-0.69067
 -20  -1  -3   72.62    9.93   7-0.45795-0.29892 0.87669-0.91988 0.13755-0.25905
 -20   0  -6  749.17   10.17   7-0.45930-0.29867 0.87738-0.88096 0.12827-0.37081
 -20   1  -8  358.59    9.43   7-0.45903-0.29857 0.87725-0.84140 0.13012-0.45361
 -20   2  16   17.78   10.34   6-0.45971-0.29532 0.87758-0.80092 0.12542 0.52145
 -20   3 -11   23.25    8.85   7-0.45904-0.29782 0.87725-0.76272 0.13009-0.57657
 -20   7 -15   16.62   10.18   7-0.45849-0.29647 0.87697-0.60501 0.13388-0.74072
 -19  -2   1   43.84   15.00  10-0.45172-0.26678 0.87288-0.95516 0.17711-0.13677
 -19  -1  -4   20.24    9.49   7-0.45804-0.26007 0.87674-0.91939 0.13692-0.29925
 -19   0  13   -7.96    8.91   7-0.45967-0.26399 0.87756-0.88063 0.12569 0.39443
 -19   1  15   14.02    9.42   6-0.45972-0.25656 0.87758-0.83943 0.12533 0.47962
 -19   5 -14   20.98    8.97   6-0.46074-0.25742 0.87804-0.68475 0.11807-0.68368
 -18  -2  -1  318.60   12.10   8-0.45694-0.22499 0.87615-0.95781 0.14428-0.18440
 -18  -2   8   88.04   11.30   7-0.45791-0.22292 0.87667-0.95759 0.13780 0.18555
 -18  -1  -5   49.85    7.91   7-0.45975-0.22004 0.87759-0.91997 0.12513-0.32784
 -18   1  -9  107.73    8.65   7-0.45900-0.22204 0.87723-0.84177 0.13034-0.49453
 -18   2  17   28.85    9.71   6-0.45946-0.21917 0.87746-0.80032 0.12717 0.55818
 -18   3 -12   41.81    8.86   7-0.45980-0.21996 0.87762-0.76276 0.12473-0.61013
 -18   3  18   83.58   10.27   6-0.46051-0.21868 0.87794-0.76239 0.11970 0.60905
 -18   4 -13   88.15    9.00   7-0.45914-0.22197 0.87730-0.72335 0.12937-0.65568
 -18   5 -14   59.35    9.06   7-0.45907-0.22152 0.87727-0.68396 0.12985-0.69679
 -18   6 -15  148.36   10.38   7-0.45960-0.22067 0.87752-0.64526 0.12617-0.73298
 -18   7 -16   67.43    9.78   6-0.46051-0.21893 0.87795-0.60634 0.11969-0.76593
 -17  -2  -2  304.17   11.35   8-0.45724-0.18645 0.87631-0.95781 0.14230-0.22289
 -17  -1  12   97.65    9.60   7-0.45849-0.18490 0.87697-0.91820 0.13388 0.35091
 -17   0  14   -2.15    8.85   7-0.45964-0.18852 0.87754-0.88044 0.12591 0.43535
 -17   2 -11  133.60    8.89   7-0.45971-0.18304 0.87758-0.80246 0.12541-0.56990
 -17   2  17   12.49    9.09   6-0.46070-0.18258 0.87803-0.80169 0.11836 0.56909
 -17   7 -16  103.15   10.60   7-0.45926-0.18305 0.87736-0.60572 0.12856-0.77566
 -17   8 -17  106.79    8.32   6-0.46082-0.18216 0.87808-0.56711 0.11750-0.80447
 -16  -1  -6   30.61    8.18   7-0.45985-0.14468 0.87764-0.91965 0.12442-0.36756
 -16  -1  12  458.82    9.08   6-0.46032-0.14551 0.87786-0.91993 0.12110 0.36429
 -16   0  -8   21.60    7.98   7-0.45932-0.14508 0.87739-0.88093 0.12811-0.45258
 -16   1 -10   38.38    8.03   6-0.46063-0.14362 0.87800-0.84134 0.11886-0.52296
 -16   1  16   52.15    9.25   6-0.45983-0.14408 0.87763-0.84030 0.12456 0.52242
 -16   8 -17   18.57   10.55   7-0.45962-0.14402 0.87754-0.56567 0.12601-0.81305
 -15   1 -10   46.97    8.38   7-0.45951-0.10699 0.87748-0.84123 0.12678-0.53161
 -15   1  16   10.91    6.64   6-0.46093-0.10507 0.87813-0.84109 0.11663 0.53018
 -15   3  19   57.70   10.29   6-0.45959-0.10497 0.87752-0.76016 0.12627 0.64072
 -15   4 -14   34.27    6.24   6-0.46093-0.10510 0.87813-0.72524 0.11663-0.68172
 -15   4  20   33.88   11.14   6-0.45979-0.10596 0.87761-0.72161 0.12484 0.68366
 -15   5 -15   89.28    6.80   6-0.46105-0.10560 0.87818-0.68520 0.11577-0.72186
 -15   8 -17  164.28    9.55   7-0.45891-0.10801 0.87719-0.56609 0.13101-0.81822
 -15   9 -18  118.74    7.97   6-0.46105-0.10640 0.87818-0.52828 0.11577-0.84329
 -14  -3   5  855.49   14.09   8-0.45675-0.07337 0.87604-0.99587 0.14553 0.05706
 -14  -2  10   21.26    8.02   6-0.45967-0.06843 0.87756-0.95790 0.12568 0.27854
 -14   2  18   45.42    9.02   7-0.45901-0.06867 0.87724-0.79917 0.13027 0.59655
 -14   3 -13   73.62    8.30   6-0.46064-0.06836 0.87800-0.76308 0.11877-0.64387
 -14   3  19  134.55   10.32   6-0.45994-0.06798 0.87768-0.76141 0.12380 0.64408
 -14   4 -14  140.06    8.98   6-0.46006-0.06911 0.87774-0.72308 0.12293-0.68843
 -14   4  20   29.30   10.24   6-0.46034-0.06769 0.87787-0.72205 0.12095 0.68792
 -14   5 -15  474.76    9.02   6-0.46025-0.06995 0.87783-0.68435 0.12159-0.72684
 -14   6 -16  119.19    6.80   6-0.46123-0.06857 0.87826-0.64616 0.11448-0.76110
 -14   9 -18   42.31    9.38   6-0.46026-0.06819 0.87783-0.52668 0.12147-0.84811
 -13  -3   5  692.04   12.45   7-0.45881-0.03337 0.87714-0.99697 0.13164 0.07074
 -13  -2  -4  326.92    8.87   7-0.46008-0.03191 0.87775-0.95871 0.12277-0.28408
 -13  -2  10  773.31    9.90   6-0.46014-0.03184 0.87778-0.95861 0.12237 0.28219
 -13  -1  13   10.05    8.20   7-0.45899-0.03120 0.87723-0.91790 0.13043 0.39479
 -13   0  15    7.77    8.07   6-0.45954-0.03041 0.87750-0.87782 0.12656 0.47720
 -13   2  18  131.88    8.83   7-0.45936-0.03211 0.87741-0.79930 0.12782 0.59930
 -13   3 -13   20.33    8.67   6-0.46019-0.03105 0.87780-0.76235 0.12196-0.64743
 -13   3  19   60.70    8.89   6-0.46013-0.03035 0.87777-0.76124 0.12245 0.64700
 -13   4 -14   12.22    8.58   7-0.45973-0.03150 0.87759-0.72268 0.12524-0.69142
 -13   4  20   69.92    7.55   6-0.46070-0.02955 0.87803-0.72184 0.11836 0.69070
 -13   5 -15   61.50    9.10   6-0.45991-0.03063 0.87767-0.68382 0.12402-0.72990
 -13   5  21   81.60   10.63   6-0.46046-0.02966 0.87792-0.68281 0.12009 0.72930
 -13   6 -16  217.29    7.15   6-0.46082-0.03124 0.87808-0.64574 0.11750-0.76376
 -13   9 -18    5.05   10.12   6-0.46009-0.03149 0.87776-0.52631 0.12267-0.85039
 -13  11 -19   99.45   11.44   7-0.45962-0.03140 0.87753-0.44862 0.12604-0.89375
 -12  -3   5  898.13   13.41   7-0.45915 0.00494 0.87731-0.99721 0.12932 0.07306
 -12  -2  -4  381.01    8.98   7-0.45983 0.00564 0.87763-0.95852 0.12455-0.28595
 -12  -2  10  300.80    8.52   6-0.46041 0.00632 0.87790-0.95848 0.12044 0.28391
 -12  -1  13  695.04    9.67   7-0.45925 0.00469 0.87736-0.91748 0.12861 0.39667
 -12   0  15  235.40    8.36   7-0.45924 0.00518 0.87735-0.87829 0.12872 0.47707
 -12   2  18  123.14    9.02   7-0.45940 0.00612 0.87743-0.79939 0.12758 0.59984
 -12   3 -13  494.21    8.95   6-0.45999 0.00575 0.87771-0.76234 0.12342-0.64797
 -12   3  19   42.28    8.72   6-0.46027 0.00742 0.87783-0.76142 0.12146 0.64733
 -12   4 -14  207.40    8.52   7-0.45963 0.00615 0.87754-0.72335 0.12595-0.69124
 -12   4  20  181.81    7.58   6-0.46082 0.00757 0.87808-0.72197 0.11750 0.69104
 -12   5 -15  173.82    8.65   7-0.45978 0.00623 0.87761-0.68373 0.12488-0.73045
 -12   5  21   34.77    9.73   6-0.46051 0.00790 0.87794-0.68252 0.11973 0.73002
 -12   6 -16   25.71    6.06   6-0.46070 0.00705 0.87803-0.64457 0.11836-0.76521
 -12   9 -18  129.44    9.66   6-0.45994 0.00669 0.87768-0.52689 0.12378-0.85048
 -12  11 -19   74.67   10.63   7-0.45954 0.00678 0.87750-0.44819 0.12658-0.89440
 -11  -3   5   25.55    9.12   7-0.45859 0.04363 0.87702-0.99646 0.13322 0.06842
 -11  -2  10  684.40    9.88   6-0.46004 0.04393 0.87773-0.95816 0.12304 0.28121
 -11  -1  13   96.05    8.24   7-0.45896 0.04357 0.87721-0.91753 0.13067 0.39388
 -11   0  15   -6.22    7.93   7-0.45893 0.04382 0.87720-0.87801 0.13086 0.47535
 -11   2  18  330.12    8.90   7-0.45922 0.04270 0.87734-0.79925 0.12881 0.59839
 -11   3 -13   90.64    7.82   6-0.46020 0.04514 0.87780-0.76272 0.12192-0.64578
 -11   3  19   42.71    9.55   6-0.46014 0.04520 0.87778-0.76095 0.12237 0.64620
 -11   4 -14  258.42    8.72   7-0.45978 0.04361 0.87761-0.72304 0.12492-0.69005
 -11   4  20   60.52    9.25   6-0.46058 0.04617 0.87797-0.72185 0.11922 0.68953
 -11   5 -15  538.45    9.11   6-0.45995 0.04348 0.87769-0.68381 0.12367-0.72895
 -11   5  21   59.21    9.63   6-0.46034 0.04588 0.87787-0.68261 0.12095 0.72844
 -11   6 -16   23.69    6.14   6-0.46093 0.04486 0.87813-0.64500 0.11663-0.76342
 -11   6  22    4.28   10.83   6-0.45979 0.04431 0.87761-0.64220 0.12483 0.76441
 -11   9 -18    9.30    9.09   6-0.46016 0.04430 0.87778-0.52597 0.12224-0.84981
 -11  11 -19   13.38    9.99   7-0.45960 0.04496 0.87752-0.44694 0.12617-0.89383
 -10  -3   2  141.34   18.56  10-0.45130 0.07366 0.87260-0.99225 0.17957-0.09836
 -10  -3   4  785.24   14.40   7-0.45809 0.07973 0.87677-0.99616 0.13658 0.02566
 -10  -2  10  216.86    8.70   7-0.45948 0.08135 0.87747-0.95684 0.12702 0.27692
 -10   3 -13  567.52    6.93   6-0.46093 0.08246 0.87813-0.76317 0.11663-0.64135
 -10   3  19   60.25    9.27   6-0.45981 0.08306 0.87763-0.76066 0.12467 0.64265
 -10   4 -14  502.13    8.68   6-0.46031 0.08205 0.87786-0.72328 0.12111-0.68610
 -10   4  20   18.53    9.44   6-0.46009 0.08322 0.87776-0.72144 0.12267 0.68637
 -10   5 -15   11.16    7.99   6-0.46058 0.08298 0.87797-0.68429 0.11922-0.72491
 -10   5  21  127.00   10.24   6-0.45995 0.08317 0.87769-0.68256 0.12371 0.72507
 -10   6  22   -0.33   10.56   7-0.45955 0.07574 0.87750-0.64373 0.12655 0.76058
 -10   9 -18   26.66    8.40   6-0.46032 0.08313 0.87786-0.52591 0.12107-0.84682
 -10  11 -19   53.60    9.84   6-0.45999 0.08256 0.87771-0.44722 0.12338-0.89090
  -9   1 -10  172.00    8.51   7-0.45975 0.11997 0.87759-0.84055 0.12514-0.52844
  -9   1  16   61.85    8.12   6-0.46050 0.12057 0.87794-0.83993 0.11979 0.52754
  -9   3  19  244.35    8.70   7-0.45911 0.11851 0.87729-0.75941 0.12957 0.63842
  -9   4 -14  476.45    6.88   6-0.46117 0.12062 0.87823-0.72376 0.11491-0.67969
  -9   4  20   76.69    9.34   7-0.45963 0.12017 0.87754-0.72044 0.12594 0.68181
  -9   5  21  345.66   10.50   7-0.45948 0.11890 0.87747-0.68092 0.12703 0.72153
  -9   8 -17  108.93    8.33   7-0.45914 0.11891 0.87730-0.56543 0.12936-0.81643
  -9   9 -18  145.93    6.96   6-0.46129 0.12064 0.87828-0.52823 0.11405-0.84073
  -9  11 -19   85.61    7.19   6-0.46076 0.11994 0.87805-0.44872 0.11793-0.88579
  -8  -2   9  374.88    9.37   6-0.45981 0.15767 0.87762-0.95735 0.12472 0.23883
  -8  -1  -6 1929.22   13.10   6-0.46047 0.15767 0.87793-0.91886 0.12000-0.36116
  -8  -1  12   69.03    8.01   6-0.45991 0.15842 0.87767-0.91835 0.12400 0.36026
  -8   0  -8  248.79    9.41   7-0.45965 0.15712 0.87755-0.88001 0.12585-0.44796
  -8   0  14 1456.39    8.79   6-0.46076 0.15794 0.87805-0.87904 0.11793 0.44779
  -8   1  16  698.04    9.32   7-0.45953 0.15651 0.87749-0.83863 0.12665 0.51995
  -8   8 -17   92.68    8.72   6-0.45993 0.15773 0.87768-0.56553 0.12386-0.80964
  -7  -2  -2 1638.36   18.58   7-0.45844 0.19366 0.87695-0.95695 0.13424-0.21396
  -7  -2   8  264.47    7.02   6-0.46093 0.19683 0.87813-0.95756 0.11663 0.20628
  -7   0  14    7.51    7.53   7-0.45928 0.19533 0.87737-0.87727 0.12844 0.43613
  -7   2 -11 1118.51   10.13   6-0.46015 0.19504 0.87778-0.80109 0.12228-0.56563
  -7   2  17   41.32    8.26   6-0.46022 0.19676 0.87781-0.80016 0.12181 0.56478
  -7   7 -16  146.36    8.65   7-0.45965 0.19520 0.87755-0.60521 0.12581-0.77176
  -7   7  22  112.44    7.99   6-0.46082 0.19733 0.87808-0.60304 0.11750 0.77179
  -7   8 -17   21.88    6.06   6-0.46135 0.19682 0.87830-0.56610 0.11361-0.80050
  -7  10 -18   -4.59    8.71   7-0.45979 0.20241 0.87761-0.47989 0.12483-0.85365
  -7  12 -19   85.98    9.49   7-0.45978 0.19586 0.87761-0.40777 0.12490-0.89184
  -7  14 -20   95.49    8.01   6-0.46117 0.19670 0.87823-0.33073 0.11491-0.92299
  -6  -2  -1   63.90   14.45   7-0.45864 0.23377 0.87705-0.95618 0.13286-0.17242
  -6  -2   7 1366.85   12.51   6-0.46052 0.23401 0.87795-0.95743 0.11963 0.16313
  -6  -1  11  557.20    9.33   6-0.45970 0.23290 0.87757-0.91755 0.12546 0.31893
  -6   1  -9 2224.01   12.61   7-0.45960 0.23236 0.87752-0.84036 0.12617-0.48902
  -6   1  15  220.73    6.37   6-0.46070 0.23393 0.87803-0.83983 0.11836 0.48757
  -6   3 -12  121.26    6.06   6-0.46070 0.23444 0.87803-0.76272 0.11836-0.60236
  -6   3  18   92.45    8.66   6-0.45994 0.23387 0.87768-0.76066 0.12379 0.60375
  -6   4 -13 1179.29   10.27   7-0.45966 0.23236 0.87755-0.72274 0.12576-0.65060
  -6   4  19   20.59    6.40   6-0.46082 0.23519 0.87808-0.72102 0.11750 0.65015
  -6   5 -14  134.61    8.45   7-0.45953 0.23223 0.87749-0.68357 0.12670-0.69173
  -6   5  20   27.47    6.70   6-0.46082 0.23467 0.87808-0.68203 0.11750 0.69117
  -6   6 -15  303.12    9.28   6-0.46001 0.23307 0.87772-0.64420 0.12328-0.72831
  -6   6  21  363.63    9.36   6-0.46032 0.23357 0.87786-0.64274 0.12109 0.72827
  -6   7 -16   64.41    6.15   6-0.46123 0.23400 0.87826-0.60614 0.11448-0.76001
  -6   7  22   -1.82   10.07   7-0.45955 0.22726 0.87750-0.60397 0.12655 0.76271
  -6  10 -18    4.82    6.50   6-0.46129 0.23479 0.87828-0.48627 0.11405-0.84158
  -6  12 -19   36.25    6.85   6-0.46129 0.23516 0.87828-0.40806 0.11405-0.88206
  -5  -2   5 4076.12   18.31   6-0.46087 0.27256 0.87810-0.95729 0.11707 0.08495
  -5  -1  -4   95.79   10.81   7-0.45960 0.27184 0.87753-0.91809 0.12616-0.28613
  -5  -1  10  122.62    6.63   6-0.46058 0.27254 0.87797-0.91806 0.11922 0.28381
  -5   2  16  181.59    6.23   6-0.46117 0.27233 0.87823-0.80050 0.11491 0.53164
  -5   4  19   44.49    8.07   7-0.45913 0.27081 0.87730-0.71969 0.12947 0.63753
  -5   5  20  107.86    8.48   7-0.45922 0.27054 0.87734-0.68062 0.12884 0.67926
  -5   9 -17  637.49    7.12   6-0.46064 0.27139 0.87800-0.52686 0.11879-0.80523
  -5  11 -18   16.81    8.58   7-0.45971 0.27176 0.87758-0.44610 0.12542-0.85253
  -5  13 -19  414.04    9.48   6-0.46020 0.27101 0.87780-0.36904 0.12195-0.88886
  -4  -1  -3  855.06   15.60   7-0.45965 0.30892 0.87755-0.91796 0.12581-0.24542
  -4  -1   9 4106.09   15.34   6-0.46048 0.30941 0.87793-0.91784 0.11992 0.24358
  -4   0  -6  100.54    7.73   6-0.46070 0.30961 0.87803-0.87967 0.11836-0.35899
  -4   0  12 4181.86   14.33   6-0.45993 0.30866 0.87768-0.87843 0.12386 0.36127
  -4   1  -8 1161.14   11.10   6-0.46005 0.30867 0.87774-0.84007 0.12297-0.44470
  -4   1  14 1289.46    9.83   6-0.46042 0.30901 0.87790-0.83880 0.12037 0.44537
  -4   3 -11 1405.13   10.67   7-0.45971 0.30818 0.87758-0.76164 0.12542-0.56918
  -4   3  17   54.82    5.99   6-0.46070 0.31066 0.87803-0.76044 0.11836 0.56809
  -4   7 -15   15.69    8.43   7-0.45941 0.30886 0.87743-0.60336 0.12750-0.73478
  -4   7  21   43.14    7.18   6-0.46105 0.31108 0.87818-0.60276 0.11577 0.73336
  -4   8 -16  112.57    6.28   6-0.46076 0.30927 0.87805-0.56615 0.11793-0.76369
  -4   8  22  111.05   10.19   6-0.45985 0.30951 0.87764-0.56355 0.12443 0.76463
  -4  10 -17  383.86    8.42   7-0.45894 0.30815 0.87720-0.48630 0.13080-0.81733
  -4  14 -19   89.57   10.06   7-0.45974 0.30978 0.87759-0.32910 0.12517-0.89179
  -3  -1   8 1480.62   12.28   7-0.45912 0.34600 0.87729-0.91654 0.12949 0.19385
  -3   0  -5    3.76   11.15   7-0.45974 0.34633 0.87759-0.87817 0.12522-0.32730
  -3   0  11   10.46    8.25   7-0.46007 0.34676 0.87775-0.87864 0.12284 0.32403
  -3   2  -9  647.75   10.02   7-0.45972 0.34594 0.87758-0.80068 0.12536-0.48771
  -3   2  15  117.25    6.51   6-0.46064 0.34692 0.87800-0.79973 0.11879 0.48720
  -3   4  18  415.99    9.15   7-0.45936 0.34578 0.87741-0.72001 0.12786 0.59956
  -3   5 -13  407.59    7.13   6-0.46093 0.34763 0.87813-0.68369 0.11663-0.64085
  -3   5  19    4.04    8.52   7-0.45967 0.34765 0.87756-0.68050 0.12569 0.64312
  -3   6 -14  106.04    6.46   6-0.46111 0.34769 0.87821-0.64452 0.11534-0.68025
  -3   6  20   85.85    9.06   6-0.45970 0.34701 0.87757-0.64166 0.12547 0.68229
  -3   7  21  233.16    8.98   7-0.45893 0.34535 0.87720-0.60229 0.13087 0.71818
  -3   9 -16  121.25    7.70   7-0.45899 0.34659 0.87723-0.52577 0.13043-0.77632
  -3  10 -17  198.33    6.72   6-0.46129 0.34806 0.87828-0.48731 0.11405-0.80041
  -3  12 -18   12.72    6.30   6-0.46093 0.34821 0.87813-0.40689 0.11663-0.84413
  -3  15 -19   72.18   10.21   6-0.45980 0.34760 0.87762-0.28860 0.12475-0.89181
  -2   0  -4 3304.88   18.20   6-0.46093 0.38550 0.87813-0.87917 0.11663-0.27634
  -2   0  10 7325.73   18.30   6-0.45991 0.38442 0.87767-0.87793 0.12397 0.28027
  -2   3 -10  108.13    6.16   6-0.46093 0.38575 0.87813-0.76177 0.11663-0.51901
  -2   3  16   71.93    8.86   6-0.45976 0.38464 0.87760-0.76004 0.12503 0.52114
  -2   4  17  458.68    7.33   6-0.46123 0.38564 0.87826-0.72143 0.11448 0.57281
  -2   8 -15   48.70    8.44   6-0.45987 0.38459 0.87765-0.56436 0.12428-0.72977
  -2   8  21  136.38    9.06   6-0.46052 0.38527 0.87795-0.56327 0.11965 0.72947
  -2   9  22   67.35    9.37   7-0.45913 0.38444 0.87730-0.52307 0.12944 0.75934
  -2  11 -17   72.32    7.81   6-0.46033 0.38609 0.87786-0.44668 0.12100-0.80657
  -2  13 -18   54.18    6.69   6-0.46070 0.38631 0.87803-0.36817 0.11836-0.84525
  -2  16 -19   25.36    9.90   6-0.46039 0.38602 0.87789-0.24938 0.12058-0.88778
  -1   3  -9  576.95    9.93   7-0.45920 0.42112 0.87733-0.76104 0.12899-0.49162
  -1   3  15  126.99    6.54   6-0.46093 0.42362 0.87813-0.76050 0.11663 0.48911
  -1   5  18  295.03    8.54   7-0.45906 0.42104 0.87726-0.68047 0.12993 0.59747
  -1   6  19  247.16    8.61   7-0.45928 0.42161 0.87737-0.64117 0.12844 0.63919
  -1  10 -16  501.85    6.88   6-0.46082 0.42351 0.87808-0.48681 0.11750-0.76326
  -1  10  22    0.71   10.20   6-0.45985 0.42312 0.87764-0.48315 0.12440 0.76524
  -1  12 -17  187.96    8.99   6-0.45998 0.42310 0.87770-0.40652 0.12348-0.80918
  -1  14 -18   70.73    6.99   6-0.46105 0.42441 0.87818-0.32963 0.11577-0.84283
  -1  15 -18   17.04    8.93   7-0.45887 0.42291 0.87717-0.28775 0.13129-0.85881
   0   0   6 3793.35   17.67   6-0.46022 0.46053 0.87781-0.87768 0.12180 0.12015
   0   1  -4 3106.29   21.04   7-0.45941 0.45892 0.87743-0.83910 0.12751-0.28782
   0   1  10  815.14    8.02   6-0.46064 0.46090 0.87800-0.83864 0.11879 0.28467
   0   4  16 1250.60    9.90   7-0.45928 0.45918 0.87737-0.71933 0.12841 0.51841
   0   5 -11    5.20    8.58   6-0.45990 0.46005 0.87767-0.68118 0.12406-0.56797
   0   5  17    5.12    8.33   7-0.45994 0.46154 0.87768-0.68033 0.12377 0.56681
   0   6 -12  234.66    8.62   7-0.45951 0.45995 0.87748-0.64319 0.12678-0.61082
   0   6  18  201.55    6.64   6-0.46082 0.46117 0.87808-0.64205 0.11750 0.61023
   0   7 -13    4.19    7.89   6-0.45979 0.46039 0.87761-0.60258 0.12483-0.65069
   0   7  19   12.17    8.23   7-0.46008 0.46222 0.87775-0.60160 0.12276 0.64951
   0   8 -14  437.07    6.76   6-0.46070 0.46099 0.87803-0.56503 0.11836-0.68322
   0   8  20   12.58    9.12   6-0.45988 0.46105 0.87766-0.56193 0.12420 0.68504
   0  11 -16   53.04    8.05   6-0.46032 0.46157 0.87786-0.44658 0.12107-0.76572
   0  11  22   21.30   10.47   6-0.46009 0.46134 0.87775-0.44375 0.12273 0.76708
   0  13 -17   -3.33    8.35   7-0.46009 0.46727 0.87776-0.36193 0.12267-0.80598
   0  16 -18   39.98   10.36   7-0.45984 0.46125 0.87764-0.24862 0.12447-0.85122
   1   1   8  831.24    8.81   6-0.46135 0.49938 0.87830-0.83877 0.11361 0.20913
   1   2  11  120.82    6.44   6-0.46117 0.49950 0.87823-0.79936 0.11491 0.32894
   1   3  13  649.09    7.22   6-0.46141 0.49933 0.87833-0.75996 0.11318 0.41216
   1   4  -9 1048.10    8.90   6-0.46123 0.49912 0.87826-0.72220 0.11448-0.47658
   1   4  15  897.66   10.09   6-0.45970 0.49760 0.87757-0.71989 0.12547 0.48066
   1   5  16  152.38    6.43   6-0.46117 0.49936 0.87823-0.68167 0.11491 0.53195
   1   9 -14  502.62    8.81   7-0.45985 0.49814 0.87764-0.52485 0.12441-0.68909
   1   9  20  125.09    8.60   6-0.46046 0.49933 0.87792-0.52337 0.12009 0.68880
   1  10  21   47.13    9.09   7-0.45898 0.49863 0.87722-0.48303 0.13052 0.71829
   1  12 -16  234.50    6.90   6-0.46082 0.49948 0.87808-0.40780 0.11750-0.76351
   1  12  22   -3.06   11.36   7-0.45976 0.49345 0.87760-0.40644 0.12504 0.76786
   1  15 -17   19.28    8.95   7-0.45921 0.49896 0.87733-0.28693 0.12893-0.81711
   2   3  -6   18.97    9.80   6-0.46005 0.53470 0.87773-0.76141 0.12301-0.36294
   2   3  12 1222.23   10.24   6-0.46017 0.53622 0.87779-0.75986 0.12216 0.36289
   2   4  14  218.15    8.85   7-0.45952 0.53549 0.87749-0.71936 0.12673 0.43876
   2  10 -14  576.37    8.86   7-0.45978 0.53584 0.87761-0.48518 0.12489-0.68982
   2  10  20   28.07    8.57   6-0.46052 0.53757 0.87795-0.48373 0.11965 0.68907
   2  14 -16    3.52    8.43   6-0.45973 0.53830 0.87759-0.32488 0.12526-0.77681
   2  16 -17   14.78    9.03   6-0.46070 0.53764 0.87803-0.24841 0.11836-0.80508
   2  17 -17   37.29    9.61   7-0.45899 0.53737 0.87723-0.20880 0.13043-0.81648
   3   2   7  532.17    8.21   6-0.46105 0.57459 0.87818-0.79914 0.11577 0.16628
   3   5  -8   53.24    8.77   7-0.45893 0.57307 0.87720-0.68154 0.13083-0.45231
   3   5  14  185.81    6.66   6-0.46093 0.57497 0.87813-0.68142 0.11663 0.44924
   3  11 -14   21.47    7.92   6-0.46031 0.57472 0.87785-0.44527 0.12116-0.68538
   3  11  20   74.99   10.02   6-0.46001 0.57558 0.87772-0.44412 0.12330 0.68512
   3  13 -15  427.20    8.97   7-0.45969 0.57410 0.87756-0.36685 0.12557-0.73100
   3  13  21   35.34   10.09   6-0.46056 0.57612 0.87797-0.36501 0.11933 0.73022
   3  15 -16  272.00    9.02   6-0.46062 0.57500 0.87799-0.28899 0.11889-0.76458
   4   3   8  171.58    7.18   6-0.46129 0.61273 0.87828-0.76000 0.11405 0.20816
   4   4  -5  328.41   11.09   6-0.46022 0.61093 0.87781-0.72114 0.12178-0.32209
   4   4  11   24.24    8.70   6-0.46020 0.61169 0.87781-0.72051 0.12189 0.32121
   4   5  13  395.55    8.77   6-0.45973 0.61150 0.87759-0.68010 0.12524 0.40019
   4  11 -13  368.87    8.82   7-0.45942 0.61172 0.87744-0.44578 0.12746-0.65209
   4  11  19   18.38    7.02   6-0.46082 0.61365 0.87808-0.44359 0.11750 0.65154
   4  12  20   27.13    9.34   6-0.45931 0.61151 0.87738-0.40413 0.12821 0.67883
   4  15 -15   90.49    8.67   7-0.45907 0.61262 0.87727-0.28717 0.12988-0.73542
   4  18 -16   11.00   10.35   7-0.45975 0.61283 0.87759-0.16912 0.12514-0.77121
   4  19 -16   44.73   10.20   7-0.45863 0.61304 0.87705-0.12934 0.13293-0.77878
   5   3   3 1515.42   15.20   7-0.45950 0.64867 0.87748-0.75866 0.12687-0.00605
   5   3   4  342.65   10.91   7-0.45908 0.64778 0.87727-0.75876 0.12983 0.03168
   5   4   9  493.48    9.88   6-0.45980 0.64948 0.87762-0.71939 0.12479 0.23878
   5   6  -7 1464.24   11.88   6-0.46005 0.64919 0.87774-0.64195 0.12299-0.40450
   5   6  13  381.79    8.91   6-0.46015 0.65009 0.87778-0.64149 0.12231 0.40317
   5  11 -12  556.60    8.81   7-0.45891 0.64896 0.87719-0.44500 0.13101-0.61548
   5  11  18    9.58    6.63   6-0.46105 0.65194 0.87818-0.44360 0.11577 0.61314
   5  12  19    0.11    9.53   6-0.45973 0.64974 0.87759-0.40344 0.12526 0.64271
   5  14 -14   41.97    8.57   6-0.46064 0.65182 0.87800-0.32742 0.11874-0.68286
   5  14  20  118.59   10.89   6-0.45983 0.65132 0.87763-0.32589 0.12454 0.68415
   5  17 -15  212.18    9.91   7-0.45985 0.65054 0.87764-0.20915 0.12443-0.72924
   6   4   5 1898.91   14.00   6-0.45993 0.68710 0.87768-0.71978 0.12387 0.07816
   6   5  -3  541.13   14.38   7-0.45867 0.68542 0.87706-0.68034 0.13267-0.25310
   6   5   9  875.29    9.97   6-0.46049 0.68807 0.87794-0.68071 0.11984 0.24408
   6   7  -7   93.11    8.17   6-0.46048 0.68765 0.87793-0.60277 0.11993-0.40119
   6   7  13  200.59    8.33   6-0.45995 0.68789 0.87769-0.60182 0.12371 0.40170
   6  11 -11  350.73    8.67   7-0.45927 0.68729 0.87736-0.44483 0.12850-0.57235
   6  11  17   46.40    6.61   6-0.46082 0.68990 0.87808-0.44390 0.11750 0.56978
   6  12  18   20.27    8.97   7-0.45948 0.68816 0.87747-0.40347 0.12704 0.60132
   6  14 -13   14.32    8.54   7-0.45996 0.68740 0.87769-0.32638 0.12361-0.64747
   6  14  19  127.62   10.74   6-0.46000 0.68977 0.87771-0.32552 0.12335 0.64551
   6  17 -14  128.76    9.47   7-0.45926 0.68828 0.87736-0.20894 0.12852-0.69374
   7   5   5  180.41    8.58   6-0.46027 0.72535 0.87784-0.68092 0.12139 0.08079
   7   6   9  371.60    8.96   6-0.46021 0.72578 0.87781-0.64119 0.12187 0.24200
   7   7  -5  801.53   12.27   7-0.45870 0.72371 0.87708-0.60146 0.13240-0.33381
   7   7  11  254.12    6.16   6-0.46082 0.72620 0.87808-0.60187 0.11750 0.32712
   7   8  13  167.81    7.91   7-0.45915 0.72470 0.87731-0.56110 0.12929 0.39604
   7   9  -8  676.65    9.99   6-0.46015 0.72520 0.87778-0.52352 0.12230-0.44422
   7   9  14  296.14    9.04   6-0.46006 0.72604 0.87774-0.52286 0.12290 0.44336
   7  10  -9  150.15    8.58   6-0.45986 0.72537 0.87765-0.48366 0.12433-0.48725
   7  10  15   85.34    8.06   6-0.46033 0.72675 0.87786-0.48319 0.12098 0.48548
   7  11 -10  489.05    8.83   6-0.46052 0.72566 0.87795-0.44530 0.11962-0.52229
   7  11  16  272.55    9.10   6-0.45984 0.72598 0.87764-0.44435 0.12448 0.52257
   7  12  17    6.64    8.69   7-0.45874 0.72541 0.87710-0.40307 0.13215 0.55602
   7  14 -12   27.36    8.29   6-0.46070 0.72753 0.87803-0.32570 0.11836-0.60230
   7  14  18  159.41   10.29   6-0.45982 0.72672 0.87763-0.32577 0.12464 0.60341
   7  17 -13   19.65    9.05   7-0.45907 0.72613 0.87727-0.20789 0.12985-0.65430
   8   6   1 1107.29   20.49   8-0.45608 0.75913 0.87565-0.63895 0.14997-0.10930
   8   6   5  178.31    8.24   7-0.45945 0.76247 0.87745-0.63989 0.12721 0.07442
   8   7   9  417.59    8.62   7-0.45919 0.76233 0.87733-0.60024 0.12903 0.23473
   8   8  11   14.12    7.88   7-0.45941 0.76259 0.87743-0.56077 0.12753 0.31741
   8  13 -10  251.81    8.67   7-0.45947 0.76316 0.87746-0.36590 0.12711-0.53063
   8  13  16   67.71    8.69   6-0.46059 0.76569 0.87798-0.36447 0.11912 0.52810
   8  14  17   62.50    9.19   7-0.45918 0.76342 0.87732-0.32401 0.12908 0.55724
   8  15 -11  100.51    9.97   7-0.45800 0.76143 0.87672-0.28633 0.13720-0.58004
   8  16  18   -1.07   10.08   7-0.45924 0.75755 0.87735-0.24829 0.12871 0.60276
   8  17 -12   33.70    9.12   7-0.45967 0.76393 0.87756-0.20768 0.12571-0.60975
   9   8   8    6.92    8.10   7-0.45977 0.80138 0.87761-0.56103 0.12497 0.19918
   9   9  10   70.30    7.71   6-0.46032 0.80195 0.87786-0.52279 0.12109 0.28358
   9  10  12   70.25    7.83   7-0.45882 0.80034 0.87714-0.48218 0.13159 0.35224
   9  11  13  743.76    9.61   7-0.45956 0.80073 0.87751-0.44338 0.12645 0.39952
   9  12  14  244.72    9.30   7-0.45953 0.80106 0.87749-0.40344 0.12668 0.43953
   9  13  15  150.38    8.71   7-0.45870 0.80029 0.87708-0.36440 0.13240 0.47401
   9  15  16   22.80    9.63   6-0.45977 0.80234 0.87760-0.28506 0.12499 0.52297
   9  18 -11   67.23    9.36   7-0.45934 0.80203 0.87740-0.16802 0.12797-0.57198
  10   9   7   86.91    9.36   7-0.45875 0.83810 0.87711-0.52120 0.13208 0.15069
  10  10   9  420.95    8.69   6-0.46006 0.83964 0.87774-0.48341 0.12293 0.24151
  10  11  11  154.96    8.06   7-0.45910 0.83788 0.87728-0.44275 0.12966 0.31497
  10  12  12  397.18    9.23   6-0.45972 0.83926 0.87758-0.40416 0.12533 0.36034
  10  13  13   35.62    8.63   6-0.45970 0.83966 0.87757-0.36351 0.12549 0.40083
  10  14  14   86.91    8.66   7-0.45901 0.83885 0.87724-0.32410 0.13029 0.43524
  10  16  15   33.07   10.07   7-0.45972 0.84018 0.87758-0.24558 0.12535 0.48219
  10  19 -10   76.18    9.59   7-0.46003 0.83981 0.87773-0.12896 0.12313-0.52619
  10  20 -10   69.98   11.03   7-0.45830 0.83807 0.87688-0.08895 0.13515-0.53732
  10  21 -10  104.42   12.41   7-0.45753 0.83765 0.87647-0.04896 0.14038-0.54325
  11  10   3   81.12   10.78   7-0.45747 0.87440 0.87644-0.48162 0.14078-0.01897
  11  10   4  274.69   10.30   7-0.45779 0.87445 0.87661-0.48135 0.13866 0.02306
  11  12  -3  303.81   14.11   8-0.45605 0.87300 0.87564-0.40243 0.15012-0.27070
  11  13  11  120.61    9.58   7-0.45892 0.87566 0.87719-0.36401 0.13090 0.31378
  11  14  12   55.45    9.99   7-0.45871 0.87680 0.87709-0.32389 0.13235 0.35262
  11  16  -7  179.66   10.41   7-0.45903 0.87598 0.87725-0.24696 0.13016-0.41213
  11  16  13  109.77    9.02   6-0.46041 0.87944 0.87790-0.24607 0.12041 0.40579
  11  17  14  146.63   11.36   7-0.45887 0.87600 0.87717-0.20608 0.13125 0.43485
  11  18  -8    6.45    8.94   7-0.45957 0.87702 0.87751-0.16795 0.12642-0.44857
  11  18  14  118.69   10.92   6-0.46021 0.87953 0.87781-0.16790 0.12186 0.44436
  12  12   2    5.47   12.18   8-0.45652 0.91207 0.87591-0.40139 0.14705-0.06555
  12  12   3  719.49   13.75   7-0.45805 0.91354 0.87674-0.40310 0.13690-0.01547
  12  12   4  165.59    9.99   7-0.45832 0.91334 0.87689-0.40295 0.13506 0.02703
  12  13   7  889.05   10.60   6-0.46001 0.91580 0.87772-0.36500 0.12330 0.16022
  12  14   9   27.86    8.17   7-0.45949 0.91482 0.87747-0.32379 0.12697 0.23702
  12  15  10   53.02    8.54   6-0.45977 0.91583 0.87760-0.28515 0.12500 0.27958
  12  16  11   72.26    8.88   7-0.45942 0.91525 0.87744-0.24519 0.12743 0.31736
  12  18  12   76.15   10.37   6-0.45988 0.91695 0.87765-0.16701 0.12423 0.36119
  12  19  -6   33.52   12.30   8-0.45640 0.91174 0.87584-0.12663 0.14784-0.38923
  13  15   6  299.62   10.79   7-0.45840 0.95127 0.87693-0.28505 0.13448 0.10900
  13  19  10   37.45   11.79   7-0.45892 0.95324 0.87719-0.12593 0.13092 0.27354
  13  22  -4    4.45   15.85   9-0.45481 0.94778 0.87490-0.00831 0.15806-0.31810
  14  19   5  375.11   14.27   7-0.45785 0.98930 0.87664-0.12723 0.13826 0.06497
  14  20   6   20.29   13.32   7-0.45826 0.98988 0.87686-0.08805 0.13543 0.10880
 -25   0   2    0.59    5.50   7-0.45889-0.47969 0.87780-0.87824 0.12511-0.04473
 -25   0   3    0.03    5.50   7-0.45764-0.48403 0.87718-0.87675 0.13372-0.02060
 -25   1  -2   19.37   12.36   8-0.45411-0.49193 0.87519-0.83978 0.15696-0.23750
 -25   2  -5   13.58   11.48   8-0.45530-0.48893 0.87590-0.80086 0.14928-0.35100
 -25   3  -7    7.61   10.00   8-0.45617-0.48940 0.87639-0.76239 0.14364-0.42759
 -24   0   8   90.78   14.65   9-0.45327-0.45440 0.87466-0.87758 0.16223 0.16219
 -24   3  -8   37.46   10.46   8-0.45615-0.45092 0.87638-0.76199 0.14377-0.46841
 -23   0  -2    0.41   11.44   7-0.45536-0.41741 0.87594-0.88074 0.14890-0.23088
 -23   0  10    2.50   12.26   9-0.45328-0.41647 0.87468-0.87763 0.16213 0.24263
 -23   1  -5   57.53   10.69   8-0.45517-0.41511 0.87582-0.84054 0.15018-0.35275
 -23   3  -9   15.21    9.31   8-0.45654-0.41058 0.87660-0.76168 0.14119-0.50439
 -22   0  11   54.90   11.32   8-0.45589-0.37516 0.87624-0.87831 0.14543 0.30006
 -22   1  -6   49.52    9.95   8-0.45497-0.37717 0.87570-0.83998 0.15147-0.39396
 -22   2  -8   38.16    9.10   8-0.45615-0.37545 0.87638-0.80134 0.14373-0.46891
 -22   4 -11  160.72    9.84   7-0.45667-0.37564 0.87667-0.72164 0.14027-0.58394
 -22   5 -12    7.24   10.46   8-0.45618-0.37527 0.87640-0.68286 0.14355-0.62901
 -22   6 -13   79.41   11.14   8-0.45625-0.37494 0.87644-0.64352 0.14306-0.66932
 -21  -1   9   23.74   10.71   8-0.45497-0.33838 0.87570-0.91778 0.15145 0.21296
 -21   0  12   -3.11   10.95   8-0.45540-0.34454 0.87596-0.87934 0.14863 0.33171
 -21   1  -7   65.45    8.38   8-0.45619-0.33826 0.87640-0.84019 0.14351-0.42713
 -21   1  14   18.16    9.86   8-0.45677-0.33682 0.87672-0.84043 0.13961 0.42654
 -20  -2   2   12.37    5.72   7-0.45790-0.29998 0.87731-0.95383 0.13200-0.05044
 -20  -2   5   73.99   15.86  11-0.44755-0.30888 0.87071-0.95230 0.19601 0.00661
 -20  -1  10   -2.45    9.99   8-0.45551-0.30672 0.87602-0.91896 0.14792 0.25170
 -20   0  13  116.59   11.25   8-0.45480-0.30114 0.87561-0.87823 0.15252 0.37372
 -20   1  15   27.53   11.22   8-0.45520-0.29931 0.87584-0.83877 0.14997 0.45642
 -20   4 -12   63.19    9.83   7-0.45658-0.29950 0.87662-0.72177 0.14088-0.62589
 -20   5 -13   85.32    9.78   8-0.45637-0.29948 0.87650-0.68282 0.14231-0.66813
 -20   6 -14  117.05   10.76   7-0.45651-0.29932 0.87658-0.64308 0.14135-0.70648
 -19  -2   7   43.43   11.23   8-0.45429-0.26430 0.87530-0.95694 0.15579 0.12746
 -19  -1  11  120.17   10.37   8-0.45606-0.26274 0.87633-0.91768 0.14435 0.30065
 -19   2 -10   88.91    8.40   7-0.45701-0.26082 0.87685-0.80049 0.13800-0.54169
 -19   2  17   57.16   10.62   8-0.45596-0.26066 0.87627-0.79936 0.14501 0.54235
 -19   3 -11  129.54    8.92   8-0.45538-0.26414 0.87594-0.76145 0.14882-0.59384
 -19   7 -15  110.95   10.18   8-0.45587-0.26282 0.87622-0.60435 0.14561-0.75342
 -18  -1  12   37.64   10.00   8-0.45424-0.22528 0.87527-0.91739 0.15610 0.33001
 -18   0  -7   31.38    8.24   7-0.45657-0.22241 0.87661-0.87944 0.14100-0.42322
 -18   0  14   47.90    9.13   7-0.45630-0.22249 0.87647-0.87886 0.14274 0.42332
 -18   1  16   73.35   10.94   8-0.45552-0.22333 0.87603-0.83811 0.14788 0.49864
 -18   8 -16   28.40    9.91   8-0.45566-0.22512 0.87610-0.56429 0.14698-0.79535
 -17  -2   9   88.75    8.11   7-0.45652-0.18671 0.87659-0.95744 0.14131 0.22274
 -17  -1  -5  216.33    9.89   8-0.45522-0.18855 0.87585-0.91789 0.14982-0.35165
 -17   1  -9   74.38    8.12   8-0.45582-0.18770 0.87619-0.84026 0.14595-0.51038
 -17   1  16    7.12    8.91   7-0.45752-0.18371 0.87712-0.83935 0.13459 0.51231
 -17   3 -12   13.97    8.28   7-0.45692-0.18470 0.87680-0.76103 0.13865-0.62322
 -17   3  19   -4.02   11.01   8-0.45617-0.19158 0.87639-0.76141 0.14362 0.61978
 -17   4 -13   20.72    8.85   8-0.45641-0.18615 0.87653-0.72171 0.14202-0.66794
 -17   5 -14   68.99    9.44   8-0.45643-0.18591 0.87654-0.68238 0.14191-0.70810
 -17   6 -15   75.74    9.21   7-0.45691-0.18479 0.87680-0.64336 0.13868-0.74397
 -17   9 -17   77.35   11.20   8-0.45622-0.18598 0.87642-0.52560 0.14330-0.83099
 -16  -2  10  801.59   11.76   8-0.45482-0.15091 0.87562-0.95619 0.15240 0.25258
 -16   0  15 1112.97   12.25   8-0.45517-0.15010 0.87582-0.87720 0.15018 0.45671
 -16   2 -11  130.56    8.08   7-0.45696-0.14803 0.87682-0.80028 0.13837-0.58231
 -16   2  18   44.44   10.10   8-0.45609-0.14682 0.87635-0.79912 0.14414 0.58332
 -16   3 -12  336.33    8.84   8-0.45573-0.15088 0.87614-0.76166 0.14652-0.63131
 -16   3  19   29.65    9.88   7-0.45694-0.14770 0.87681-0.76111 0.13847 0.63186
 -16   6 -15   -3.49    8.55   8-0.45617-0.14479 0.87639-0.63763 0.14362-0.75747
 -16   7 -16   58.93    9.08   7-0.45702-0.14648 0.87686-0.60431 0.13794-0.78398
 -15  -3   4   79.86   13.08   9-0.45144-0.11613 0.87347-0.99363 0.17341-0.01107
 -15  -2  -3  513.78   10.96   8-0.45522-0.11314 0.87585-0.95665 0.14984-0.27040
 -15  -2  10  173.96    8.49   7-0.45712-0.11095 0.87691-0.95739 0.13728 0.26770
 -15  -1  -6  267.55    8.91   7-0.45661-0.11171 0.87663-0.91788 0.14071-0.38233
 -15  -1  13   90.91    8.80   7-0.45630-0.10988 0.87647-0.91764 0.14276 0.38250
 -15   0  -8   -4.81    7.87   8-0.45643-0.10907 0.87654-0.87540 0.14190-0.47217
 -15   0  15   -6.34    8.84   8-0.45649-0.11595 0.87657-0.87975 0.14147 0.46151
 -15   2 -11  258.43    8.81   8-0.45601-0.11212 0.87631-0.80103 0.14465-0.58904
 -15   2  18   34.78    9.05   7-0.45702-0.10859 0.87686-0.79984 0.13793 0.59048
 -15   7 -16   30.51    9.60   8-0.45625-0.11045 0.87644-0.60344 0.14309-0.79038
 -15  10 -18  132.13   11.15   7-0.45660-0.11018 0.87663-0.48545 0.14078-0.86782
 -14  -1  -6  347.19    8.85   8-0.45568-0.07495 0.87612-0.91860 0.14684-0.38914
 -14  -1  13  677.41    9.79   7-0.45739-0.07302 0.87705-0.91788 0.13543 0.39033
 -14   0  -8  180.74    8.07   8-0.45540-0.07509 0.87596-0.87904 0.14865-0.47176
 -14   0  15  316.08    9.08   7-0.45767-0.07254 0.87720-0.87824 0.13355 0.47280
 -14   1 -10  325.44    6.88   7-0.45752-0.07296 0.87712-0.84019 0.13459-0.53820
 -14   1  17   39.52    9.18   8-0.45581-0.07227 0.87619-0.83797 0.14601 0.54095
 -14   7 -16   44.83    8.60   8-0.45569-0.07354 0.87613-0.60340 0.14674-0.79456
 -14   8 -17   26.68    7.13   7-0.45726-0.07054 0.87699-0.56391 0.13631-0.82329
 -14  10 -18   49.31   10.69   8-0.45620-0.07194 0.87641-0.48570 0.14341-0.87157
 -13  -3   6  449.12   10.95   8-0.45484-0.03728 0.87563-0.99525 0.15231 0.09106
 -13  -2  11   79.50    9.71   8-0.45460-0.03625 0.87548-0.95587 0.15382 0.29160
 -13   1 -10   87.42    8.36   7-0.45673-0.03439 0.87670-0.83948 0.13989-0.54287
 -13   1  17   29.36    9.12   8-0.45625-0.03425 0.87644-0.83834 0.14307 0.54391
 -13   8 -17    8.19    9.10   7-0.45701-0.03350 0.87685-0.56407 0.13803-0.82538
 -13  10 -18   41.29    9.85   8-0.45588-0.03486 0.87623-0.48483 0.14550-0.87421
 -12  -3   6  249.15   10.05   8-0.45541 0.00129 0.87596-0.99545 0.14857 0.09474
 -12  -2  11  416.32   10.24   8-0.45502 0.00148 0.87574-0.95560 0.15110 0.29426
 -12   1 -10  360.22    8.42   7-0.45659 0.00171 0.87663-0.83929 0.14082-0.54399
 -12   1  17  119.77    8.76   7-0.45639 0.00351 0.87651-0.83813 0.14219 0.54510
 -12   8 -17   36.99    8.46   7-0.45669 0.00452 0.87668-0.56396 0.14017-0.82599
 -12  10 -18   14.64    8.96   8-0.45580 0.00259 0.87619-0.48470 0.14605-0.87486
 -12  12 -19   81.92   10.04   8-0.45601 0.00294 0.87630-0.40789 0.14466-0.91318
 -11  -3   6  475.72   10.98   8-0.45477 0.03871 0.87559-0.99493 0.15275 0.09071
 -11   1 -10   49.54    7.72   7-0.45683 0.04325 0.87675-0.83914 0.13926-0.54221
 -11   1  17  199.17    8.92   8-0.45620 0.04080 0.87641-0.83791 0.14341 0.54373
 -11   8 -17   32.58    8.42   7-0.45701 0.04189 0.87685-0.56427 0.13803-0.82459
 -11  10 -18  115.53    8.71   8-0.45593 0.03982 0.87626-0.48586 0.14522-0.87319
 -11  12 -19   23.04   10.27   8-0.45615 0.04139 0.87638-0.40619 0.14372-0.91290
 -10  -3   5  659.42   11.89   8-0.45536 0.07705 0.87594-0.99523 0.14890 0.05411
 -10  -1  -6 2612.43   13.68   8-0.45572 0.07666 0.87614-0.91809 0.14655-0.38844
 -10  -1  13   12.53    7.75   7-0.45717 0.07953 0.87694-0.91736 0.13695 0.38899
 -10   0  15  701.67    9.30   7-0.45738 0.07913 0.87705-0.87803 0.13553 0.47115
 -10   1 -10  602.35    7.08   7-0.45777 0.07853 0.87725-0.84022 0.13286-0.53628
 -10   1  17  298.22    8.71   8-0.45567 0.07806 0.87611-0.83738 0.14687 0.54027
 -10   2  18   51.82    6.48   7-0.45777 0.08127 0.87725-0.79917 0.13286 0.59490
 -10   7 -16  182.52    8.21   8-0.45568 0.07673 0.87612-0.60376 0.14683-0.79340
 -10   8 -17  166.72    6.64   7-0.45752 0.07959 0.87712-0.56493 0.13459-0.82122
 -10  10 -18  103.57    9.40   8-0.45624 0.07872 0.87643-0.48614 0.14312-0.87027
 -10  12 -19  114.31    9.91   8-0.45638 0.07871 0.87651-0.40705 0.14223-0.90995
  -9  -2  -3  565.95   10.93   8-0.45607 0.11544 0.87634-0.95702 0.14427-0.26463
  -9  -2  10   84.97    8.33   7-0.45688 0.11714 0.87678-0.95656 0.13888 0.26500
  -9  -1  -6  285.93    9.13   7-0.45701 0.11637 0.87685-0.91765 0.13805-0.37910
  -9  -1  13   84.31    8.23   8-0.45611 0.11717 0.87636-0.91658 0.14398 0.38089
  -9   0  -8   -1.19    8.64   8-0.45656 0.11888 0.87661-0.87443 0.14104-0.46970
  -9   0  15   -5.07    8.54   8-0.45636 0.11131 0.87650-0.87885 0.14233 0.46282
  -9   2 -11   74.80    8.04   8-0.45616 0.11564 0.87639-0.80032 0.14371-0.58790
  -9   2  18   19.12    8.82   7-0.45677 0.11776 0.87672-0.79908 0.13962 0.58872
  -9   6  22   14.34    7.66   7-0.45777 0.11998 0.87725-0.64159 0.13286 0.75705
  -9   7 -16  265.05    8.67   8-0.45634 0.11547 0.87649-0.60429 0.14249-0.78814
  -9  10 -18  121.58    8.77   7-0.45682 0.11699 0.87675-0.48618 0.13928-0.86581
  -9  12 -19  141.06    9.26   7-0.45690 0.11722 0.87679-0.40701 0.13874-0.90572
  -8   2 -11  368.02    6.66   7-0.45758 0.15443 0.87715-0.80074 0.13415-0.57808
  -8   2  18    4.29    8.89   8-0.45571 0.15402 0.87614-0.79839 0.14663 0.58107
  -8   3 -12   46.17    8.19   8-0.45590 0.15292 0.87624-0.76082 0.14537-0.63011
  -8   3  19   11.31    8.11   7-0.45685 0.15559 0.87677-0.75956 0.13907 0.63063
  -8   4  20   14.34    6.70   7-0.45764 0.15719 0.87718-0.72009 0.13372 0.67502
  -8   5  21    6.43    6.97   7-0.45752 0.15728 0.87712-0.68069 0.13459 0.71475
  -8   6 -15   27.34    8.27   8-0.45610 0.15293 0.87636-0.64387 0.14405-0.74928
  -8   6  22  283.62   10.82   7-0.45673 0.15533 0.87670-0.64253 0.13988 0.74970
  -8   7 -16   29.08    6.15   7-0.45745 0.15571 0.87708-0.60375 0.13502-0.78144
  -8  10 -18  118.53    6.75   7-0.45783 0.15536 0.87728-0.48647 0.13243-0.85947
  -8  12 -19   67.78    7.11   7-0.45796 0.15566 0.87734-0.40768 0.13157-0.89950
  -7  -2   9   44.74    8.76   8-0.45620 0.19346 0.87641-0.95554 0.14341 0.21897
  -7  -1  -5   83.73   10.30   8-0.45572 0.19150 0.87614-0.91740 0.14657-0.34703
  -7  -1  12   46.77    8.07   7-0.45701 0.19275 0.87685-0.91727 0.13803 0.34628
  -7   1  -9  459.26    9.50   8-0.45591 0.19021 0.87625-0.83930 0.14530-0.50822
  -7   1  16  140.96    8.33   7-0.45699 0.19265 0.87684-0.83806 0.13818 0.50900
  -7   3 -12   12.17    5.89   7-0.45764 0.19311 0.87718-0.76044 0.13372-0.61921
  -7   3  19   23.43    8.37   8-0.45602 0.19308 0.87631-0.75837 0.14461 0.62150
  -7   4 -13  200.76    8.71   7-0.45657 0.19114 0.87661-0.72086 0.14096-0.66548
  -7   4  20  157.33    9.60   7-0.45633 0.19301 0.87648-0.71982 0.14258 0.66584
  -7   5 -14  477.89    9.08   7-0.45665 0.19095 0.87666-0.68209 0.14043-0.70525
  -7   5  21  144.65   10.33   7-0.45633 0.19298 0.87648-0.68008 0.14254 0.70644
  -7   6 -15  414.52    7.36   7-0.45752 0.19226 0.87712-0.64347 0.13459-0.74035
  -7   6  22  192.19    9.81   8-0.45584 0.19257 0.87621-0.64013 0.14581 0.74299
  -7   9 -17  202.47    8.85   8-0.45634 0.19194 0.87649-0.52455 0.14248-0.82901
  -7  11 -18   69.71    8.55   8-0.45573 0.19100 0.87615-0.44631 0.14651-0.87387
  -7  13 -19   31.05    9.80   7-0.45647 0.19328 0.87656-0.36635 0.14166-0.90984
  -6  -2   8 1009.97   11.26   8-0.45622 0.22960 0.87642-0.95543 0.14330 0.18057
  -6   0  -7 4327.56   14.97   7-0.45752 0.22984 0.87712-0.87874 0.13459-0.41652
  -6   0  14  599.83    9.04   8-0.45596 0.22964 0.87628-0.87637 0.14500 0.42131
  -6   2  17   46.71    5.93   7-0.45764 0.23227 0.87718-0.79926 0.13372 0.55284
  -6   8 -16   94.83    8.16   8-0.45584 0.22887 0.87621-0.56363 0.14579-0.79305
  -6   8  23   17.36   10.57   7-0.45707 0.23305 0.87688-0.56211 0.13760 0.79287
  -6   9 -17  234.95    6.32   7-0.45796 0.23099 0.87734-0.52575 0.13157-0.81809
  -6  11 -18    9.88    8.30   7-0.45697 0.23143 0.87683-0.44541 0.13831-0.86439
  -6  13 -19   -3.54    7.05   7-0.45777 0.23927 0.87725-0.36106 0.13286-0.90087
  -6  14 -19  197.48    9.48   8-0.45548 0.22896 0.87600-0.32779 0.14813-0.91619
  -5  -2   6  897.75   12.40   7-0.45734 0.26874 0.87702-0.95615 0.13583 0.10703
  -5  -1  11    2.98    8.38   7-0.45636 0.26865 0.87650-0.91449 0.14233 0.29914
  -5   0  13   -3.67    5.68   7-0.45790 0.26516 0.87731-0.87891 0.13200 0.39402
  -5   1  15   90.55    6.14   7-0.45764 0.26961 0.87718-0.83795 0.13372 0.47249
  -5   2 -10 1812.10    9.73   7-0.45808 0.26828 0.87741-0.80074 0.13071-0.53403
  -5   2  17  226.83    8.40   8-0.45551 0.26729 0.87602-0.79737 0.14797 0.53941
  -5   3 -11 1479.21   10.35   8-0.45560 0.26554 0.87607-0.76045 0.14736-0.59133
  -5   3  18  219.49    8.30   7-0.45720 0.26873 0.87695-0.75969 0.13674 0.59072
  -5   6  21   99.07    6.89   7-0.45783 0.27021 0.87728-0.64199 0.13243 0.71654
  -5   7 -15  269.59    9.18   8-0.45593 0.26603 0.87626-0.60341 0.14522-0.75090
  -5   7  22    6.93    9.03   7-0.45694 0.27042 0.87682-0.60117 0.13846 0.75111
  -5   8 -16   23.00    6.20   7-0.45771 0.26965 0.87722-0.56388 0.13329-0.77980
  -5   8  23  192.94   10.17   8-0.45557 0.26801 0.87606-0.56183 0.14753 0.78188
  -5  10 -17   70.53    8.58   8-0.45601 0.26800 0.87630-0.48484 0.14467-0.83186
  -5  12 -18  134.30    8.55   8-0.45591 0.26769 0.87625-0.40684 0.14534-0.87282
  -5  14 -19   46.00    9.50   7-0.45691 0.26957 0.87680-0.32769 0.13870-0.90501
  -4  -1  10 1900.21   12.23   8-0.45567 0.30508 0.87611-0.91550 0.14688 0.25787
  -4   2  16  238.10    6.48   7-0.45790 0.30730 0.87731-0.79892 0.13200 0.51505
  -4   4 -12  720.14    7.24   7-0.45739 0.30566 0.87705-0.72158 0.13545-0.61979
  -4   4  19  272.78    8.81   8-0.45597 0.30542 0.87628-0.71874 0.14493 0.62318
  -4   5 -13  404.77    9.34   7-0.45678 0.30492 0.87673-0.68167 0.13957-0.66384
  -4   5  20   13.18    9.02   8-0.45627 0.30667 0.87645-0.67952 0.14298 0.66523
  -4   6 -14  357.09    6.88   7-0.45739 0.30584 0.87705-0.64327 0.13545-0.70076
  -4   6  21   74.87    8.86   8-0.45594 0.30654 0.87626-0.64037 0.14516 0.70314
  -4   9 -16   63.69    8.04   8-0.45551 0.30448 0.87602-0.52410 0.14792-0.79450
  -4   9  23   52.44   10.29   7-0.45710 0.30826 0.87690-0.52288 0.13743 0.79396
  -4  12 -18  128.28    6.61   7-0.45783 0.30729 0.87728-0.40715 0.13243-0.85943
  -4  15 -19   94.72    9.59   7-0.45678 0.30766 0.87673-0.28861 0.13957-0.90612
  -3   1  -7  437.66   10.11   7-0.45691 0.34284 0.87680-0.83887 0.13869-0.42010
  -3   1  14  254.46    8.58   8-0.45623 0.34369 0.87642-0.83737 0.14324 0.42232
  -3   3  17    4.05    7.70   7-0.45714 0.34525 0.87692-0.75877 0.13717 0.55044
  -3   8 -15  771.99    9.36   8-0.45607 0.34209 0.87634-0.56413 0.14426-0.75038
  -3   8  22    1.91    9.85   7-0.45682 0.34608 0.87675-0.56161 0.13932 0.75060
  -3  11 -17    0.16    7.79   8-0.45662 0.35084 0.87664-0.43937 0.14061-0.82608
  -3  13 -18  187.07    7.27   7-0.45726 0.34477 0.87699-0.36704 0.13631-0.86321
  -3  16 -19   23.95    9.80   7-0.45703 0.34544 0.87686-0.24859 0.13789-0.90433
  -2  -1   6  641.26    9.41   7-0.45733 0.38240 0.87702-0.91629 0.13588 0.10661
  -2   1  -6  653.38   12.22   8-0.45560 0.37935 0.87607-0.83822 0.14739-0.38851
  -2   1  13 3859.64   13.35   7-0.45684 0.38193 0.87676-0.83778 0.13914 0.38691
  -2   2  -8  612.59   10.29   7-0.45662 0.38048 0.87664-0.79925 0.14062-0.46259
  -2   2  15  812.22    9.32   7-0.45638 0.38144 0.87651-0.79777 0.14224 0.46438
  -2   4 -11  814.83    7.71   7-0.45790 0.38185 0.87731-0.72153 0.13200-0.57561
  -2   4  18  141.47    8.26   8-0.45558 0.38084 0.87606-0.71868 0.14748 0.57994
  -2   5 -12  125.07    8.46   7-0.45682 0.38107 0.87675-0.68087 0.13927-0.62373
  -2   5  19   62.12    8.57   8-0.45626 0.38194 0.87644-0.67983 0.14301 0.62447
  -2   6 -13  499.98    9.44   7-0.45678 0.38073 0.87673-0.64201 0.13955-0.66393
  -2   6  20  106.29    9.17   7-0.45627 0.38203 0.87645-0.64026 0.14293 0.66504
  -2   7 -14   30.15    6.28   7-0.45771 0.38233 0.87722-0.60376 0.13329-0.69808
  -2   7  21   60.77    8.72   8-0.45568 0.38203 0.87612-0.60102 0.14684 0.70081
  -2  10 -16   37.98    8.21   7-0.45657 0.38201 0.87661-0.48410 0.14098-0.78614
  -2  10  23   13.31   10.89   7-0.45631 0.38320 0.87647-0.48250 0.14272 0.78683
  -2  12 -17   81.44    8.58   8-0.45632 0.38169 0.87648-0.40638 0.14260-0.82924
  -2  14 -18   11.51    6.79   7-0.45733 0.38332 0.87702-0.32681 0.13588-0.86308
  -1   0   9   -3.44    6.30   7-0.45726 0.41724 0.87699-0.87769 0.13631 0.22946
  -1   1  -5  676.64   13.60   8-0.45565 0.41720 0.87610-0.83798 0.14704-0.34773
  -1   1  12  197.12    8.77   7-0.45684 0.41980 0.87676-0.83765 0.13918 0.34543
  -1   2  14  273.90    8.85   7-0.45714 0.42030 0.87692-0.79840 0.13717 0.42808
  -1   4  17  138.43    8.18   7-0.45709 0.42034 0.87690-0.72030 0.13746 0.54968
  -1   7  20  181.22    6.76   7-0.45790 0.42103 0.87731-0.60222 0.13200 0.67691
  -1   8 -14  103.47    8.27   8-0.45586 0.41806 0.87622-0.56359 0.14565-0.71099
  -1   8  21   79.71    8.93   7-0.45694 0.42030 0.87682-0.56232 0.13846 0.71095
  -1   9 -15  314.81    6.75   7-0.45777 0.42065 0.87725-0.52503 0.13286-0.73850
  -1   9  22   31.68    9.42   8-0.45574 0.42000 0.87615-0.52174 0.14645 0.74153
  -1  11 -16  554.14    9.17   8-0.45614 0.41842 0.87638-0.44561 0.14380-0.79029
  -1  13 -17   43.48    8.81   8-0.45630 0.42006 0.87646-0.36626 0.14278-0.82934
  -1  16 -18   52.14   10.26   8-0.45602 0.42063 0.87631-0.24799 0.14459-0.87193
   0   0   7    1.51    9.98   7-0.45649 0.45686 0.87657-0.87638 0.14147 0.14161
   0   1  11    1.39    8.41   7-0.45636 0.45654 0.87650-0.83602 0.14233 0.29938
   0   2  13    2.78    7.78   7-0.45714 0.45811 0.87692-0.79775 0.13717 0.38842
   0   3  -8  110.59    6.86   7-0.45726 0.45774 0.87699-0.76029 0.13631-0.45777
   0   3  15    2.13    8.31   8-0.45623 0.45288 0.87643-0.75883 0.14319 0.46520
   0   9  21    2.03    6.98   7-0.45777 0.45457 0.87725-0.52436 0.13286 0.71887
   0  10 -15    0.11    7.77   8-0.45669 0.46367 0.87668-0.47847 0.14018-0.74430
   0  10  22  402.98   10.67   8-0.45615 0.45729 0.87638-0.48275 0.14372 0.74591
   0  12 -16  196.51    9.11   8-0.45619 0.45733 0.87641-0.40631 0.14346-0.78987
   0  14 -17    6.03    8.36   8-0.45660 0.45786 0.87663-0.32708 0.14075-0.82567
   0  17 -18   53.14    9.92   7-0.45737 0.46026 0.87704-0.20866 0.13556-0.86215
   1   1   9   40.57    9.35   7-0.45681 0.49507 0.87674-0.83798 0.13939 0.22231
   1   2  -5 1248.22   11.99   7-0.45739 0.49471 0.87705-0.79922 0.13545-0.33655
   1   2  12  836.29    9.68   8-0.45620 0.49503 0.87641-0.79696 0.14344 0.34165
   1   3  -7 1810.81   11.39   7-0.45739 0.49490 0.87705-0.76004 0.13545-0.41749
   1   3  14  113.04    8.77   8-0.45620 0.49489 0.87641-0.75807 0.14340 0.42134
   1   5 -10  555.54    7.40   7-0.45790 0.49566 0.87731-0.68168 0.13200-0.53549
   1   5  17  291.47    8.53   8-0.45567 0.49482 0.87611-0.67880 0.14691 0.54026
   1   6 -11 1027.72   10.25   7-0.45662 0.49421 0.87664-0.64144 0.14064-0.58443
   1   6  18   77.38    8.73   7-0.45635 0.49500 0.87649-0.64073 0.14242 0.58490
   1   7 -12  148.14    8.24   7-0.45662 0.49446 0.87664-0.60233 0.14064-0.62457
   1   7  19   93.61    9.08   7-0.45632 0.49572 0.87648-0.60084 0.14262 0.62540
   1   8 -13    3.16    6.00   7-0.45764 0.49626 0.87718-0.56263 0.13372-0.65928
   1   8  20  325.96    8.84   8-0.45581 0.49494 0.87619-0.56094 0.14596 0.66214
   1  11 -15  339.74    9.03   7-0.45680 0.49509 0.87674-0.44501 0.13945-0.74478
   1  11  22  200.36   11.35   7-0.45618 0.49576 0.87640-0.44351 0.14357 0.74575
   1  13 -16  278.51    9.29   7-0.45659 0.49519 0.87663-0.36589 0.14082-0.78677
   1  16 -17   55.65    9.90   8-0.45607 0.49637 0.87634-0.24774 0.14426-0.83108
   2   1   6  653.84   12.36   7-0.45709 0.53326 0.87689-0.83739 0.13749 0.10427
   2   2  10  275.39    6.88   7-0.45790 0.53426 0.87731-0.79829 0.13200 0.27197
   2   5  -9  583.85    7.73   7-0.45733 0.53298 0.87702-0.68131 0.13588-0.49864
   2   5  16  668.68    9.47   8-0.45606 0.53284 0.87633-0.67894 0.14435 0.50242
   2   6 -10  542.89    9.25   8-0.45555 0.53092 0.87604-0.64104 0.14771-0.55157
   2   6  17  316.80    8.41   7-0.45697 0.53391 0.87683-0.64086 0.13827 0.54930
   2   7  18  198.06    6.78   7-0.45733 0.53418 0.87702-0.60164 0.13588 0.59193
   2   8 -12   33.06    8.02   8-0.45576 0.53241 0.87616-0.56145 0.14633-0.63136
   2   8  19   16.64    8.32   7-0.45694 0.53488 0.87682-0.56113 0.13846 0.63004
   2   9 -13   42.96    7.83   7-0.45690 0.53346 0.87679-0.52356 0.13873-0.66236
   2   9  20   35.96    9.32   7-0.45623 0.53359 0.87643-0.52157 0.14322 0.66435
   2  11  21   38.33    8.06   7-0.45777 0.53674 0.87725-0.44381 0.13286 0.71656
   2  12 -15  429.25    7.14   7-0.45758 0.53415 0.87715-0.40625 0.13415-0.73990
   2  12  22   24.93   10.32   8-0.45551 0.53399 0.87602-0.40322 0.14792 0.74230
   2  15 -16   10.09    8.71   7-0.45596 0.53445 0.87628-0.28486 0.14498-0.79463
   2  18 -17  122.07   10.96   8-0.45644 0.53439 0.87654-0.16951 0.14182-0.82722
   3   2   8  207.38    9.63   7-0.45680 0.57122 0.87674-0.79801 0.13946 0.18250
   3   3  11  746.74    9.50   7-0.45710 0.57161 0.87690-0.75866 0.13744 0.30718
   3   4  13  400.10    6.76   7-0.45739 0.57178 0.87705-0.71954 0.13545 0.39014
   3   5  15  380.77    8.64   8-0.45571 0.57030 0.87614-0.67870 0.14662 0.45961
   3   6  16  260.17    8.50   7-0.45714 0.57185 0.87692-0.64079 0.13717 0.50960
   3   7  17  200.47    6.44   7-0.45777 0.57250 0.87725-0.60181 0.13286 0.55462
   3   8  18  134.23    6.45   7-0.45771 0.57246 0.87722-0.56222 0.13329 0.59495
   3   9 -12  146.96    8.09   8-0.45562 0.56969 0.87608-0.52262 0.14723-0.63211
   3   9  19  178.33    8.65   7-0.45697 0.57219 0.87683-0.52259 0.13832 0.63046
   3  10 -13   50.28    6.02   7-0.45739 0.57211 0.87705-0.48448 0.13545-0.65981
   3  10  20  145.49    9.23   8-0.45596 0.57116 0.87628-0.48223 0.14497 0.66290
   3  12 -14  158.43    8.18   8-0.45567 0.57049 0.87611-0.40474 0.14693-0.71302
   3  12  21  103.84    9.96   7-0.45698 0.57316 0.87683-0.40497 0.13824 0.71142
   3  14 -15   89.14    8.79   8-0.45588 0.57077 0.87623-0.32654 0.14554-0.75202
   3  16 -16   20.35    6.69   7-0.45764 0.57385 0.87718-0.24783 0.13372-0.77943
   3  17 -16  480.29   10.21   8-0.45576 0.57060 0.87616-0.20888 0.14630-0.79320
   4   3   9  749.41   10.49   7-0.45679 0.60913 0.87673-0.75837 0.13949 0.22416
   4   6  -8  414.02    9.42   8-0.45635 0.60769 0.87649-0.64099 0.14243-0.46525
   4   6  15  537.45    9.14   7-0.45648 0.60928 0.87657-0.64008 0.14155 0.46498
   4   7  16  406.85    6.77   7-0.45764 0.61005 0.87718-0.60157 0.13372 0.51315
   4   8  17   47.56    6.34   7-0.45790 0.61160 0.87731-0.56123 0.13200 0.55548
   4   9  18   51.98    6.44   7-0.45752 0.61098 0.87712-0.52323 0.13459 0.59225
   4  10 -12  244.33    8.61   8-0.45631 0.60818 0.87647-0.48373 0.14268-0.62716
   4  10  19   17.27    9.26   7-0.45654 0.61025 0.87660-0.48195 0.14119 0.62722
   4  13 -14   99.03    8.11   7-0.45732 0.61021 0.87702-0.36597 0.13592-0.70098
   4  13  21    1.09   10.16   7-0.45636 0.60935 0.87650-0.36512 0.14233 0.70295
   4  16 -15   19.59    8.74   8-0.45578 0.60978 0.87617-0.24621 0.14620-0.75212
   5   3   2  609.24   14.33   8-0.45661 0.64618 0.87664-0.75820 0.14067-0.06024
   5   3   5  593.16   11.36   7-0.45654 0.64644 0.87660-0.75799 0.14114 0.06063
   5   5  -5 1069.69   12.81   7-0.45660 0.64568 0.87663-0.67980 0.14078-0.34243
   5   5  12  193.84    8.45   7-0.45637 0.64709 0.87650-0.67884 0.14228 0.34225
   5   7  -8    8.55    8.35   8-0.45604 0.64654 0.87632-0.60020 0.14448-0.46727
   5   7  15  281.81    8.68   7-0.45656 0.64754 0.87661-0.60087 0.14102 0.46567
   5   8  16   25.98    5.85   7-0.45739 0.64811 0.87705-0.56199 0.13545 0.51143
   5   9  17  668.70    9.27   7-0.45730 0.64799 0.87700-0.52277 0.13608 0.55182
   5  10 -11  137.15    8.25   8-0.45616 0.64618 0.87639-0.48363 0.14366-0.58789
   5  10  18  109.10    9.41   7-0.45662 0.64794 0.87664-0.48287 0.14064 0.58732
   5  11  19   21.33    8.97   8-0.45586 0.64615 0.87622-0.44254 0.14568 0.62035
   5  13 -13   87.71    8.51   8-0.45629 0.64727 0.87646-0.36507 0.14282-0.66731
   5  13  20   43.18   10.65   7-0.45645 0.64864 0.87655-0.36381 0.14178 0.66752
   5  15 -14  165.85    9.06   7-0.45667 0.64720 0.87667-0.28648 0.14033-0.70494
   5  18 -15   79.71    9.31   7-0.45720 0.64853 0.87695-0.16888 0.13671-0.74112
   5  19 -15   52.83   10.78   8-0.45618 0.64803 0.87640-0.12846 0.14355-0.74974
   5  20 -15   70.09   12.05   8-0.45465 0.64558 0.87552-0.08908 0.15349-0.75764
   6   4   6  627.19   10.26   7-0.45680 0.68478 0.87674-0.71875 0.13941 0.10299
   6   5  10   16.82    8.26   8-0.45622 0.68403 0.87642-0.67855 0.14332 0.26103
   6   6  -5  207.03    9.54   8-0.45621 0.68336 0.87642-0.64052 0.14332-0.34497
   6   6  12  222.53    8.43   7-0.45649 0.68501 0.87657-0.63999 0.14148 0.34337
   6   8  -8  118.92    8.57   7-0.45689 0.68426 0.87679-0.56177 0.13881-0.46128
   6   8  15  186.76    8.32   8-0.45619 0.68470 0.87640-0.56081 0.14349 0.46256
   6   9  -9  421.79    9.24   8-0.45631 0.68382 0.87647-0.52244 0.14270-0.50616
   6   9  16   81.54    8.89   7-0.45647 0.68604 0.87656-0.52149 0.14161 0.50492
   6  10 -10  159.21    8.26   7-0.45666 0.68421 0.87666-0.48267 0.14034-0.54386
   6  10  17  150.88    9.04   7-0.45627 0.68504 0.87645-0.48224 0.14295 0.54403
   6  13 -12  687.61    9.74   8-0.45606 0.68373 0.87633-0.36534 0.14437-0.62966
   6  13  19    3.17   10.28   8-0.45649 0.68192 0.87657-0.36550 0.14147 0.63244
   6  15 -13  390.81    9.48   8-0.45623 0.68450 0.87643-0.28689 0.14320-0.66853
   6  18 -14   -6.89    9.50   8-0.45643 0.69099 0.87654-0.16347 0.14190-0.70295
   6  19 -14   27.18   11.29   8-0.45468 0.68329 0.87554-0.12809 0.15329-0.71778
   7   5   6 1204.06   11.31   7-0.45728 0.72336 0.87699-0.67940 0.13623 0.10634
   7   6  10 1131.64   10.12   8-0.45601 0.72202 0.87631-0.63866 0.14466 0.25942
   7   7  12  139.61    8.21   8-0.45606 0.72240 0.87633-0.59930 0.14433 0.34028
   7  13 -11  288.04    8.82   7-0.45650 0.72218 0.87658-0.36479 0.14141-0.58541
   7  13  18   84.70    9.93   7-0.45630 0.72408 0.87647-0.36338 0.14276 0.58492
   7  15 -12  375.77    9.33   8-0.45632 0.72221 0.87648-0.28636 0.14264-0.62777
   7  15  19   18.47   11.25   7-0.45656 0.72419 0.87661-0.28483 0.14104 0.62723
   7  18 -13   12.53    9.39   7-0.45627 0.72359 0.87645-0.16740 0.14295-0.66833
   8   6   6 1014.00   10.56   8-0.45632 0.76018 0.87648-0.63903 0.14261 0.09985
   8   9  -6  367.92    9.19   7-0.45650 0.75963 0.87658-0.52193 0.14140-0.38344
   8   9  13   37.71    8.49   8-0.45635 0.76118 0.87650-0.52061 0.14240 0.38307
   8  10  -7  260.95   10.51   8-0.45462 0.75789 0.87550-0.48163 0.15369-0.43624
   8  10  14  231.04    8.29   7-0.45708 0.76164 0.87689-0.48301 0.13756 0.42903
   8  11  -8  364.49   10.32   8-0.45466 0.75782 0.87552-0.44220 0.15344-0.47645
   8  11  15  119.59    8.43   7-0.45709 0.76197 0.87689-0.44363 0.13748 0.46940
   8  12  -9  404.04    9.15   8-0.45634 0.75999 0.87649-0.40390 0.14249-0.50627
   8  12  16  284.90    9.66   7-0.45641 0.76143 0.87652-0.40372 0.14206 0.50525
   8  15  18   85.32   10.25   8-0.45600 0.76114 0.87630-0.28494 0.14476 0.58170
   8  18 -12   30.65    9.32   8-0.45652 0.76125 0.87659-0.16737 0.14127-0.62507
   8  19 -12   41.97   10.78   8-0.45443 0.75835 0.87539-0.12784 0.15488-0.63797
   9   7   2 1502.34   17.66   9-0.45345 0.79473 0.87478-0.59843 0.16109-0.08009
   9   7   3 1574.93   15.35   8-0.45559 0.79733 0.87607-0.59977 0.14742-0.02635
   9   7   4   99.49    8.28   8-0.45615 0.79765 0.87638-0.59970 0.14374 0.01729
   9   7   5 1022.19   12.20   8-0.45501 0.79674 0.87573-0.59904 0.15117 0.05080
   9   8   9  376.46    8.97   8-0.45575 0.79753 0.87616-0.55988 0.14637 0.21708
   9   9  11   97.27    8.27   8-0.45591 0.79823 0.87625-0.52032 0.14531 0.29845
   9  14  -9  769.92   10.14   8-0.45652 0.79796 0.87659-0.32530 0.14129-0.50476
   9  14  16   97.24    9.89   7-0.45636 0.79921 0.87650-0.32402 0.14234 0.50476
   9  16 -10   30.83    8.27   8-0.45617 0.79880 0.87639-0.24553 0.14360-0.54717
   9  16  17  261.44   11.64   7-0.45650 0.80012 0.87657-0.24592 0.14145 0.54626
   9  19 -11  136.80    9.90   8-0.45638 0.79883 0.87651-0.12833 0.14223-0.58636
   9  20 -11  159.55   11.64   8-0.45478 0.79682 0.87559-0.08816 0.15268-0.59661
  10   9   8   83.31    9.06   8-0.45487 0.83470 0.87564-0.52010 0.15211 0.17171
  10  10  10  463.90    8.77   8-0.45598 0.83590 0.87629-0.48079 0.14485 0.25917
  10  15  -8   37.78    8.19   8-0.45638 0.83663 0.87651-0.28521 0.14225-0.46499
  10  15  15   37.94    9.34   7-0.45638 0.83787 0.87651-0.28423 0.14222 0.46460
  10  17  -9  144.27    9.09   8-0.45640 0.83622 0.87652-0.20704 0.14209-0.50578
  10  17  16   17.81   10.81   7-0.45638 0.83770 0.87651-0.20581 0.14223 0.50515
  11  10   2  368.03   12.78   9-0.45377 0.87144 0.87498-0.48064 0.15905-0.07831
  11  10   5   40.05    9.75   8-0.45527 0.87349 0.87588-0.48051 0.14948 0.05322
  11  11   8  201.40    8.42   7-0.45705 0.87567 0.87687-0.44266 0.13777 0.18537
  11  12  10  102.17    8.17   7-0.45652 0.87512 0.87658-0.40282 0.14132 0.26343
  11  15  -6  177.76   10.92   8-0.45494 0.87248 0.87569-0.28464 0.15163-0.39403
  11  15  13   15.36    8.88   7-0.45680 0.87647 0.87674-0.28424 0.13944 0.38667
  11  16  14  413.88   10.07   8-0.45566 0.87352 0.87610-0.24527 0.14699 0.41910
  11  19  -8  337.22   10.57   8-0.45631 0.87437 0.87647-0.12806 0.14268-0.46638
  11  20  -8   25.17   11.45   8-0.45418 0.87268 0.87523-0.08663 0.15647-0.47918
  12  12   1  235.93   18.89  11-0.44488 0.90075 0.86865-0.39577 0.21074-0.17012
  12  12   5  494.97   11.16   8-0.45590 0.91209 0.87624-0.40253 0.14542 0.05650
  12  12   6  219.98   10.28   8-0.45449 0.91000 0.87542-0.40165 0.15451 0.08809
  12  13   8   56.55    7.83   8-0.45636 0.91262 0.87650-0.36334 0.14239 0.18079
  12  14  10   91.26    9.83   8-0.45502 0.91070 0.87574-0.32357 0.15109 0.25281
  12  15  11   63.49    9.74   8-0.45532 0.91151 0.87591-0.28367 0.14918 0.29496
  12  17  -5  300.91   13.21   8-0.45409 0.90935 0.87518-0.20522 0.15707-0.35910
  12  17  12    1.51    9.15   8-0.45636 0.91545 0.87650-0.20529 0.14233 0.34466
  12  18  13   41.67   11.35   8-0.45483 0.91257 0.87562-0.16476 0.15232 0.37338
  12  20  -6   99.90   12.92   9-0.45285 0.90853 0.87440-0.08628 0.16478-0.40728
  13  15   7   11.29    9.72   8-0.45512 0.94851 0.87579-0.28413 0.15049 0.13274
  13  16   8  106.85    9.02   7-0.45651 0.95143 0.87658-0.24498 0.14134 0.18210
  13  17   9  152.74    9.67   7-0.45674 0.95186 0.87671-0.20610 0.13984 0.22416
  13  18  10   72.69    9.85   8-0.45612 0.95088 0.87637-0.16595 0.14395 0.25964
  13  19  -3   41.32   15.98  10-0.45055 0.94530 0.87287-0.12335 0.17870-0.29963
  14  18   2  143.44   20.37  11-0.44589 0.97857 0.86944-0.15999 0.20524-0.12385
  14  18   3  202.23   16.28   9-0.45216 0.98459 0.87395-0.16426 0.16905-0.04717
  14  18   4   62.78   14.11   9-0.45273 0.98573 0.87433-0.16435 0.16552-0.00383
  14  18   5   17.71   12.63   9-0.45262 0.98522 0.87425-0.16370 0.16623 0.03596
  14  19   6   46.56   11.97   8-0.45484 0.98755 0.87563-0.12551 0.15229 0.09018
  14  20   7   13.85   12.07   8-0.45483 0.98730 0.87562-0.08705 0.15233 0.13109
 -26   2  -3   46.67   12.07   9-0.45272-0.53052 0.87460-0.80018 0.16582-0.28731
 -25   4  -8   31.47   12.13   9-0.45228-0.49280 0.87432-0.72108 0.16852-0.49119
 -24   2  -6  135.58   10.21   8-0.45420-0.45332 0.87554-0.79953 0.15637-0.39918
 -24   4  -9  119.46   11.06   9-0.45338-0.45381 0.87503-0.72170 0.16163-0.52646
 -23   2  -7  233.87    9.61   8-0.45441-0.41577 0.87567-0.79961 0.15500-0.43786
 -23   4 -10   15.07    9.75   8-0.45465-0.41259 0.87581-0.72245 0.15350-0.55826
 -23   5 -11   17.83   10.48   9-0.45363-0.41516 0.87519-0.68269 0.16001-0.60439
 -22  -1   8   21.43   12.26  10-0.45022-0.38186 0.87291-0.91445 0.18108 0.14296
 -22   0  -3  158.33   11.59  10-0.45095-0.38205 0.87342-0.87671 0.17669-0.29858
 -22   1  14    6.19   12.21   9-0.45162-0.38139 0.87388-0.83690 0.17260 0.39456
 -22   3  -9  142.99   10.94   9-0.45267-0.37943 0.87457-0.76064 0.16609-0.53033
 -21  -1  -1  144.40   12.25  10-0.45109-0.34355 0.87352-0.91556 0.17584-0.21696
 -21   3 -10   54.02    8.83   8-0.45504-0.33784 0.87604-0.76191 0.15093-0.55588
 -21   4 -11   30.97   10.05   9-0.45345-0.33922 0.87507-0.72170 0.16119-0.60633
 -21   5 -12   30.17   10.17   9-0.45287-0.33952 0.87470-0.68217 0.16486-0.65025
 -21   6 -13   76.34   10.58   9-0.45319-0.33944 0.87490-0.64281 0.16285-0.68912
 -21   7 -14   26.80   11.44   9-0.45380-0.33855 0.87529-0.60385 0.15894-0.72381
 -20   0  -5  661.54   11.40   9-0.45158-0.30592 0.87385-0.87687 0.17286-0.37546
 -20   2  -9    2.25    9.10   8-0.45414-0.30151 0.87550-0.80019 0.15675-0.52184
 -19   0  -6    2.82    7.86   8-0.45401-0.26454 0.87542-0.87866 0.15760-0.40153
 -19   0  14   -1.74   11.16   9-0.45279-0.26677 0.87465-0.87647 0.16532 0.40160
 -19   1  -8  108.06    8.78   8-0.45425-0.26340 0.87556-0.83922 0.15609-0.47924
 -19   1  16    7.55   11.01   9-0.45178-0.26900 0.87398-0.83683 0.17162 0.47724
 -19   4 -12   89.39    9.48   9-0.45390-0.26308 0.87535-0.72146 0.15834-0.64309
 -19   5 -13  249.50   10.06   9-0.45376-0.26394 0.87527-0.68191 0.15919-0.68447
 -19   6 -14   76.60    9.54   8-0.45422-0.26205 0.87555-0.64343 0.15628-0.72138
 -18  -2   9  343.85   10.78   9-0.45186-0.23046 0.87404-0.95442 0.17110 0.19262
 -18  -1  -4    1.30    9.26   9-0.45204-0.22930 0.87416-0.91681 0.17003-0.33138
 -18   2 -10   48.80    8.19   8-0.45432-0.22484 0.87561-0.79982 0.15562-0.55940
 -18   2  18   11.15   11.66   9-0.45243-0.22829 0.87442-0.79659 0.16759 0.55963
 -18   3 -11  203.28    9.00   9-0.45279-0.22784 0.87465-0.76043 0.16536-0.61075
 -18   7 -15   74.12   10.15   9-0.45361-0.22485 0.87517-0.60347 0.16017-0.76685
 -17  -2  10   22.56    9.41   9-0.45184-0.19087 0.87403-0.95401 0.17122 0.23258
 -17  -1  13   25.74   10.02   9-0.45194-0.18986 0.87409-0.91544 0.17064 0.35512
 -17   0  -7   -5.55    8.22   9-0.45374-0.18780 0.87525-0.87503 0.15932-0.44939
 -17   0  15    4.37    9.10   9-0.45279-0.19124 0.87465-0.87625 0.16532 0.44217
 -17   2  18   37.25   10.32   8-0.45419-0.18880 0.87553-0.79813 0.15643 0.57171
 -17   8 -16  272.42   10.93   9-0.45375-0.18759 0.87526-0.56423 0.15928-0.80561
 -16  -2  -2  418.60   11.75  10-0.45054-0.15531 0.87314-0.95414 0.17914-0.26023
 -16  -1  -5  797.62   11.64   9-0.45173-0.15395 0.87395-0.91584 0.17190-0.37425
 -16  -1  13  364.76    9.45   8-0.45426-0.15226 0.87557-0.91639 0.15602 0.36996
 -16   1  -9  457.00    9.22   9-0.45349-0.15150 0.87510-0.83918 0.16091-0.52499
 -16   1  17  446.27   11.04   9-0.45342-0.15286 0.87505-0.83631 0.16137 0.52588
 -16   4 -13   11.04    8.14   8-0.45500-0.14783 0.87602-0.72220 0.15117-0.67777
 -16   5 -14  145.97    6.61   8-0.45507-0.14972 0.87606-0.68305 0.15074-0.71678
 -16   8 -16   20.85    9.18   9-0.45263-0.15144 0.87455-0.56363 0.16633-0.81353
 -16   9 -17   23.59    7.73   8-0.45487-0.14753 0.87594-0.52494 0.15202-0.83963
 -15  -3   5  803.82   14.31   9-0.45098-0.11762 0.87344-0.99316 0.17648 0.02575
 -15  -2  11  256.58   10.18   9-0.45211-0.11618 0.87420-0.95431 0.16960 0.27506
 -15   1  17   23.80    8.94   8-0.45467-0.11204 0.87582-0.83764 0.15331 0.53366
 -15   3 -12   41.87    8.47   8-0.45405-0.11138 0.87544-0.75994 0.15737-0.64245
 -15   3  20    8.28   10.38   9-0.45275-0.11457 0.87462-0.75692 0.16562 0.64244
 -15   4 -13   92.50    8.49   9-0.45365-0.11120 0.87519-0.72125 0.15992-0.68561
 -15   5 -14    2.88    8.91   9-0.45378-0.10756 0.87527-0.67656 0.15911-0.73025
 -15   6 -15  233.48    8.95   8-0.45479-0.11203 0.87589-0.64386 0.15255-0.75856
 -15   9 -17   35.42   10.30   9-0.45382-0.11120 0.87530-0.52453 0.15880-0.84540
 -14  -3   6  533.15   11.20   9-0.45256-0.07809 0.87450-0.99420 0.16677 0.07613
 -14  -2  -3  365.83   10.46   9-0.45246-0.07742 0.87444-0.95523 0.16738-0.28859
 -14  -2  11  384.00    9.17   8-0.45371-0.07688 0.87523-0.95502 0.15954 0.28550
 -14   2 -11  382.78    8.70   8-0.45470-0.07485 0.87584-0.80027 0.15316-0.59700
 -14   3 -12   44.23    8.85   9-0.45334-0.07476 0.87500-0.76043 0.16187-0.64702
 -14   3  20   10.49   10.64   8-0.45353-0.07652 0.87512-0.75736 0.16067 0.64732
 -14   4 -13   85.73    8.21   9-0.45272-0.07523 0.87461-0.72034 0.16577-0.69132
 -14   4  21   38.40   11.76   8-0.45392-0.07502 0.87536-0.71852 0.15821 0.69030
 -14   5 -14   14.81    8.80   8-0.45337-0.07531 0.87502-0.68196 0.16169-0.72918
 -14   6 -15   20.35    8.90   8-0.45393-0.07380 0.87537-0.64226 0.15812-0.76448
 -14   9 -17   23.95   10.14   9-0.45333-0.07453 0.87499-0.52462 0.16197-0.84931
 -14  11 -18   15.91   10.18   9-0.45273-0.07484 0.87461-0.44565 0.16575-0.89311
 -13  -3   7  341.65   10.14   9-0.45144-0.04116 0.87376-0.99309 0.17368 0.10931
 -13  -1  -6  174.71    8.96   8-0.45403-0.03725 0.87543-0.91700 0.15751-0.39939
 -13  -1  14  105.47    8.40   9-0.45281-0.03981 0.87466-0.91509 0.16521 0.39973
 -13   0  -8  -12.15    8.24   9-0.45404-0.03491 0.87544-0.87405 0.15739-0.48665
 -13   0  16   -3.39    8.36   9-0.45307-0.04448 0.87483-0.87608 0.16361 0.47861
 -13   2 -11   84.00    8.50   8-0.45402-0.03634 0.87542-0.79974 0.15756-0.60111
 -13   2  19  110.80    8.98   9-0.45276-0.03894 0.87463-0.79660 0.16553 0.60180
 -13   3 -12  436.19    8.76   9-0.45274-0.03843 0.87462-0.75993 0.16566-0.65063
 -13   3  20   74.12   10.59   8-0.45387-0.03771 0.87533-0.75774 0.15852 0.65007
 -13   4  21   37.45   11.11   8-0.45409-0.03754 0.87547-0.71886 0.15711 0.69280
 -13   6 -15  205.76    9.18   9-0.45356-0.03706 0.87514-0.64310 0.16047-0.76635
 -13   7 -16  147.81    7.04   8-0.45513-0.03524 0.87610-0.60458 0.15031-0.79712
 -13   9 -17   96.59    9.07   9-0.45283-0.03696 0.87468-0.52402 0.16508-0.85207
 -12  -3   7  612.06   10.94   9-0.45206-0.00287 0.87417-0.99334 0.16989 0.11309
 -12  -1  -6 1794.68   12.35   9-0.45383-0.00026 0.87531-0.91703 0.15877-0.40075
 -12  -1  14  369.46    9.06   9-0.45311-0.00219 0.87486-0.91462 0.16332 0.40237
 -12   0  -8 1332.79   10.58   8-0.45395-0.00015 0.87538-0.87795 0.15797-0.48061
 -12   0  16  129.30    8.29   9-0.45288-0.00179 0.87471-0.87546 0.16477 0.48142
 -12   2 -11  409.71    8.51   8-0.45389 0.00011 0.87534-0.79956 0.15841-0.60227
 -12   2  19  281.80    9.35   9-0.45283-0.00180 0.87467-0.79656 0.16513 0.60286
 -12   3  20  145.36   10.56   8-0.45394 0.00006 0.87538-0.75787 0.15803 0.65078
 -12   4  21   14.66   10.58   8-0.45419-0.00049 0.87553-0.71896 0.15642 0.69351
 -12   6 -15   67.13    8.48   9-0.45330 0.00147 0.87498-0.64282 0.16212-0.76737
 -12   7 -16   31.43    6.26   8-0.45500 0.00398 0.87602-0.60389 0.15117-0.79832
 -12   9 -17  317.99    9.06   9-0.45266-0.00002 0.87456-0.52457 0.16618-0.85248
 -11  -2  11  467.25    9.15   8-0.45447 0.03760 0.87570-0.95525 0.15464 0.29078
 -11  -1  -6   55.50    8.40   9-0.45399 0.04002 0.87541-0.91687 0.15774-0.39876
 -11  -1  14   13.77    8.00   8-0.45324 0.03717 0.87494-0.91401 0.16250 0.40164
 -11   0  -8   -1.64    8.02   8-0.45448 0.03878 0.87570-0.87786 0.15460-0.47893
 -11   0  16   10.25    8.00   8-0.45347 0.03794 0.87508-0.87409 0.16108 0.48208
 -11   2 -11  458.88    9.09   8-0.45406 0.03814 0.87545-0.79946 0.15727-0.60102
 -11   2  19  215.65    9.09   9-0.45266 0.03556 0.87457-0.79624 0.16614 0.60201
 -11   3 -12  380.81    8.47   9-0.45272 0.03756 0.87460-0.75991 0.16580-0.65040
 -11   3  20  251.96   10.32   8-0.45380 0.03704 0.87529-0.75745 0.15892 0.65000
 -11   4  21   97.06   10.70   8-0.45424 0.03840 0.87556-0.71822 0.15613 0.69302
 -11   5  22  240.77   11.34   8-0.45400 0.03785 0.87541-0.67885 0.15767 0.73167
 -11   6 -15    8.88    8.58   9-0.45358 0.03901 0.87515-0.64197 0.16034-0.76699
 -11   7 -16   16.40    6.39   8-0.45513 0.04128 0.87610-0.60317 0.15031-0.79773
 -11   9 -17   94.27    8.59   9-0.45278 0.03867 0.87464-0.52451 0.16544-0.85157
 -10  -3   6 1768.84   14.43   9-0.45295 0.07379 0.87475-0.99368 0.16435 0.07854
 -10  -2  -3  557.75   11.64   9-0.45232 0.07409 0.87434-0.95469 0.16828-0.28925
 -10  -2  11  302.60    8.99   8-0.45371 0.07497 0.87523-0.95454 0.15956 0.28533
 -10   0  -8 1901.96   10.29   8-0.45526 0.07662 0.87617-0.87896 0.14945-0.47202
 -10   2 -11  282.43    6.81   8-0.45494 0.07673 0.87598-0.80053 0.15160-0.59568
 -10   3 -12  731.20    9.36   9-0.45329 0.07576 0.87497-0.76015 0.16219-0.64661
 -10   3  20  184.28    9.77   9-0.45346 0.07479 0.87508-0.75682 0.16112 0.64728
 -10   4 -13  205.61    8.04   9-0.45272 0.07567 0.87461-0.72021 0.16576-0.69087
 -10   4  21  135.06   10.48   8-0.45380 0.07554 0.87529-0.71802 0.15895 0.68998
 -10   5 -14  616.55    9.57   9-0.45306 0.07590 0.87482-0.68169 0.16368-0.72890
 -10   5  22   -5.69   10.78   9-0.45357 0.06804 0.87515-0.68040 0.16039 0.72789
 -10   6 -15  103.23    8.50   8-0.45390 0.07780 0.87535-0.64266 0.15834-0.76334
 -10   9 -17   27.00    9.01   9-0.45337 0.07765 0.87502-0.52436 0.16171-0.84892
 -10  11 -18  238.67    9.28   9-0.45274 0.07591 0.87462-0.44604 0.16566-0.89263
 -10  13 -19    5.07   10.44   8-0.45388 0.07903 0.87534-0.36642 0.15846-0.92780
  -9  -3   3  303.14   13.85  10-0.45053 0.10997 0.87313-0.99192 0.17924-0.05760
  -9  -3   4   47.55   10.07   9-0.45230 0.11341 0.87433-0.99305 0.16841-0.00636
  -9  -3   5  563.66   11.62   9-0.45173 0.11099 0.87395-0.99281 0.17195 0.03029
  -9   1  17   51.57    7.99   8-0.45440 0.11385 0.87566-0.83702 0.15511 0.53255
  -9   3 -12  321.74    8.89   8-0.45411 0.11388 0.87548-0.75997 0.15697-0.64103
  -9   3  20  105.82    8.75   9-0.45254 0.11183 0.87449-0.75698 0.16688 0.64152
  -9   4 -13  225.07    8.68   9-0.45365 0.11419 0.87520-0.72111 0.15991-0.68446
  -9   4  21   43.74    9.00   9-0.45327 0.11322 0.87496-0.71721 0.16232 0.68547
  -9   5 -14   35.81    8.54   8-0.45383 0.11506 0.87531-0.68101 0.15874-0.72426
  -9   5  22   17.61    9.59   9-0.45279 0.11228 0.87465-0.67747 0.16533 0.72495
  -9   6 -15  637.83    7.29   8-0.45487 0.11479 0.87594-0.64344 0.15202-0.75789
  -9   9 -17   58.36    8.91   8-0.45394 0.11601 0.87537-0.52404 0.15807-0.84466
  -9  11 -18    3.91    9.36   8-0.45366 0.11608 0.87521-0.44500 0.15982-0.88877
  -9  13 -19   58.27    9.58   8-0.45424 0.11684 0.87556-0.36758 0.15611-0.92330
  -8  -2  10  157.95    8.24   8-0.45463 0.15183 0.87580-0.95473 0.15360 0.25120
  -8  -1  13  257.06    8.23   8-0.45430 0.15111 0.87560-0.91499 0.15572 0.37046
  -8   0  15  157.78    6.21   8-0.45487 0.15203 0.87594-0.87589 0.15202 0.45468
  -8   1  -9  553.21    9.76   9-0.45341 0.15126 0.87505-0.83848 0.16142-0.52439
  -8   1  17  104.08    9.16   9-0.45340 0.15064 0.87504-0.83574 0.16149 0.52512
  -8   4 -13   30.11    6.29   8-0.45500 0.15441 0.87602-0.72101 0.15117-0.67646
  -8   5 -14  391.92    6.77   8-0.45520 0.15291 0.87613-0.68296 0.14988-0.71523
  -8   9 -17  126.16    6.68   8-0.45507 0.15374 0.87606-0.52575 0.15074-0.83746
  -8  11 -18  344.40    8.90   8-0.45427 0.15325 0.87558-0.44588 0.15596-0.88263
  -8  13 -19  185.08    7.66   8-0.45526 0.15500 0.87617-0.36853 0.14945-0.91725
  -8  14 -19   33.35    9.60   9-0.45292 0.15312 0.87473-0.32653 0.16454-0.93330
  -7   0  -7   -4.44    9.34   9-0.45374 0.19189 0.87525-0.87370 0.15932-0.44743
  -7   0  15   -3.23    8.11   9-0.45337 0.18259 0.87502-0.87570 0.16168 0.44346
  -7   2  18  414.03    9.17   8-0.45418 0.18857 0.87552-0.79652 0.15651 0.57148
  -7   7  23   10.10   10.29   8-0.45441 0.18934 0.87566-0.59998 0.15503 0.77522
  -7   8 -16  611.42    9.36   8-0.45381 0.19011 0.87530-0.56342 0.15889-0.80479
  -7  14 -19   49.08   10.22   9-0.45375 0.19234 0.87526-0.32719 0.15925-0.92575
  -6  -1  12  465.59    8.94   8-0.45424 0.22685 0.87556-0.91479 0.15614 0.32940
  -6   1  16   44.54    5.88   8-0.45494 0.22857 0.87598-0.83636 0.15160 0.49464
  -6   2 -10  241.29    6.68   8-0.45474 0.22770 0.87586-0.79962 0.15288-0.55616
  -6   3  19    3.07    8.56   8-0.45394 0.22625 0.87538-0.75703 0.15803 0.60996
  -6   4  20   20.44    8.25   8-0.45461 0.22809 0.87578-0.71844 0.15374 0.65434
  -6   5  21  148.00    8.94   8-0.45451 0.22686 0.87572-0.67937 0.15440 0.69526
  -6   6  22   26.63   10.24   8-0.45408 0.22744 0.87546-0.63919 0.15718 0.73224
  -6   7 -15  149.28    8.99   9-0.45367 0.22797 0.87521-0.60317 0.15976-0.76505
  -6   7  23  280.14   10.54   9-0.45315 0.22556 0.87488-0.59853 0.16310 0.76647
  -6  10 -17  146.13    8.87   9-0.45382 0.22888 0.87530-0.48471 0.15883-0.84487
  -6  12 -18    9.65    8.96   8-0.45388 0.22979 0.87534-0.40532 0.15845-0.88543
  -6  15 -19   62.11   10.99   9-0.45300 0.22878 0.87478-0.28814 0.16404-0.93036
  -5  -2   7  513.80   11.07   8-0.45415 0.26527 0.87551-0.95441 0.15668 0.12645
  -5   0  -6    4.33    9.61   8-0.45383 0.26501 0.87531-0.87645 0.15875-0.40163
  -5   0  14    8.04    7.98   9-0.45340 0.26352 0.87504-0.87405 0.16149 0.40366
  -5   1  -8 1058.49    8.73   8-0.45474 0.26540 0.87586-0.83869 0.15288-0.47557
  -5   4 -12  585.26    9.13   8-0.45406 0.26540 0.87545-0.72054 0.15730-0.64110
  -5   4  20   86.69    8.63   9-0.45271 0.26353 0.87459-0.71650 0.16588 0.64290
  -5   5 -13  616.12    9.66   8-0.45383 0.26538 0.87530-0.68102 0.15879-0.68303
  -5   5  21  101.04    8.80   9-0.45289 0.26344 0.87471-0.67771 0.16475 0.68375
  -5   6 -14   45.28    8.06   8-0.45467 0.26744 0.87582-0.64260 0.15331-0.71859
  -5   9 -16  170.34    8.24   9-0.45302 0.26592 0.87480-0.52377 0.16390-0.80990
  -5  13 -18  154.86    8.62   9-0.45273 0.26589 0.87461-0.36651 0.16575-0.89215
  -5  15 -19  217.15    8.23   8-0.45487 0.26840 0.87594-0.28865 0.15202-0.91953
  -5  16 -19   11.99   10.09   8-0.45338 0.26780 0.87503-0.24640 0.16164-0.93189
  -4   0  13  328.20    8.51   8-0.45445 0.30301 0.87569-0.87558 0.15477 0.37108
  -4   1  15  100.81    6.17   8-0.45474 0.30339 0.87586-0.83571 0.15288 0.45335
  -4   2  -9  649.81    9.97   8-0.45406 0.30303 0.87545-0.79872 0.15731-0.51980
  -4   2  17  146.92    8.36   9-0.45277 0.30124 0.87464-0.79568 0.16548 0.52159
  -4   3  18  117.80    6.32   8-0.45474 0.30334 0.87586-0.75721 0.15288 0.57490
  -4   7  22  217.78    7.60   8-0.45487 0.30268 0.87594-0.60014 0.15202 0.73784
  -4   8 -15   33.44    8.56   9-0.45302 0.30327 0.87480-0.56321 0.16390-0.76916
  -4   8  23   46.33   10.87   8-0.45360 0.30229 0.87516-0.55911 0.16025 0.76964
  -4  11 -17  201.41    8.35   8-0.45419 0.30505 0.87553-0.44570 0.15642-0.84213
  -4  13 -18   58.40    6.63   8-0.45494 0.30705 0.87598-0.36822 0.15160-0.87807
  -4  16 -19   30.37    8.07   8-0.45513 0.30856 0.87610-0.24861 0.15031-0.91858
  -3  -1   9  182.99    9.41   8-0.45438 0.34097 0.87565-0.91474 0.15522 0.20834
  -3   0  12    0.65    6.13   8-0.45526 0.33703 0.87617-0.87701 0.14945 0.33660
  -3   2  16  374.22    6.71   8-0.45481 0.34071 0.87590-0.79671 0.15245 0.49486
  -3   3 -10 1402.51    8.90   8-0.45546 0.34226 0.87628-0.76059 0.14816-0.55160
  -3   4 -11  305.23    8.98   9-0.45345 0.34089 0.87507-0.72014 0.16118-0.60441
  -3   4  19  188.98    8.76   9-0.45327 0.33913 0.87496-0.71697 0.16233 0.60553
  -3   5 -12   69.32    7.91   9-0.45295 0.34139 0.87475-0.68039 0.16434-0.64869
  -3   5  20  235.57    9.29   8-0.45366 0.33963 0.87520-0.67799 0.15986 0.64866
  -3   6 -13  251.81    9.09   9-0.45315 0.34139 0.87488-0.64148 0.16307-0.68729
  -3   6  21    7.97    9.24   8-0.45367 0.33962 0.87521-0.63782 0.15980 0.68827
  -3   7 -14 1368.74   10.53   8-0.45408 0.34152 0.87546-0.60227 0.15717-0.72191
  -3   9  23    8.37    7.90   8-0.45513 0.34169 0.87610-0.52099 0.15031 0.77982
  -3  10 -16   29.45    8.32   9-0.45370 0.34321 0.87523-0.48346 0.15956-0.80573
  -3  12 -17  535.08    9.57   9-0.45339 0.34226 0.87503-0.40608 0.16155-0.84778
  -3  14 -18  100.50    8.68   8-0.45473 0.34423 0.87586-0.32824 0.15294-0.88009
  -2  -1   7  846.31   11.88   8-0.45439 0.37890 0.87565-0.91461 0.15517 0.12804
  -2   0  11 2543.86   10.94   8-0.45500 0.37911 0.87602-0.87503 0.15117 0.29407
  -2   3  17  725.38    9.34   8-0.45390 0.37783 0.87535-0.75680 0.15834 0.52915
  -2   8  22   35.09    9.46   8-0.45428 0.37873 0.87558-0.55993 0.15590 0.73417
  -2   9 -15  263.90    8.80   8-0.45404 0.38009 0.87543-0.52394 0.15745-0.76258
  -2   9  23  261.17   10.23   9-0.45263 0.37686 0.87454-0.52010 0.16636 0.76394
  -2  11 -16  500.16    8.64   9-0.45273 0.37940 0.87461-0.44483 0.16575-0.81167
  -2  13 -17  151.87    9.60   9-0.45304 0.38037 0.87481-0.36591 0.16379-0.84978
  -2  15 -18  373.65    7.91   8-0.45513 0.38244 0.87610-0.28951 0.15031-0.87786
  -2  16 -18   15.62    9.23   9-0.45286 0.38045 0.87470-0.24696 0.16489-0.89162
  -1   0  -2    1.45   19.66   9-0.45341 0.41548 0.87504-0.87543 0.16147-0.24285
  -1   0  10   13.76    8.83   8-0.45354 0.41507 0.87513-0.87441 0.16060 0.24279
  -1   2  -7  359.35    8.19   8-0.45526 0.41751 0.87617-0.79909 0.14945-0.43137
  -1   3  16   70.03    6.23   8-0.45526 0.41707 0.87617-0.75792 0.14945 0.49694
  -1   4 -10  235.46    6.79   8-0.45526 0.41778 0.87617-0.72075 0.14945-0.55273
  -1   5 -11  192.66    8.68   9-0.45380 0.41690 0.87529-0.68060 0.15894-0.60227
  -1   5  19  109.07    8.25   9-0.45303 0.41391 0.87480-0.67724 0.16383 0.60453
  -1   6 -12  478.43    9.15   9-0.45365 0.41727 0.87519-0.64130 0.15993-0.64386
  -1   6  20  142.03    8.56   9-0.45315 0.41450 0.87488-0.63844 0.16309 0.64506
  -1   7 -13  904.59    9.54   8-0.45434 0.41761 0.87562-0.60256 0.15546-0.68016
  -1  10 -15  193.50    8.28   9-0.45304 0.41781 0.87481-0.48401 0.16376-0.76915
  -1  10  23    3.53   11.11   9-0.45357 0.40977 0.87515-0.48244 0.16039 0.77170
  -1  14 -17   51.49    9.04   9-0.45337 0.41931 0.87502-0.32615 0.16170-0.84760
  -1  17 -18  124.91   10.79   8-0.45394 0.42008 0.87538-0.20885 0.15803-0.88351
   0   0   8 6563.93   18.80   9-0.45344 0.45332 0.87506-0.87420 0.16126 0.16176
   0   2  -6 1470.11   11.20   8-0.45513 0.45511 0.87610-0.79865 0.15031-0.39188
   0   4  -9    5.95    9.01   8-0.45355 0.45501 0.87513-0.71848 0.16058-0.52535
   0   4  17    5.93    9.16   8-0.45368 0.45278 0.87521-0.71622 0.15975 0.52654
   0   5  18  340.74    8.68   8-0.45454 0.45430 0.87574-0.67793 0.15421 0.57384
   0   6  19    1.87    6.03   8-0.45494 0.44935 0.87598-0.64035 0.15160 0.61921
   0   7  20  110.79    8.74   8-0.45453 0.45474 0.87574-0.59957 0.15425 0.65515
   0   8  21   -6.53    9.45   9-0.45374 0.44825 0.87525-0.56095 0.15932 0.69287
   0   9 -14  664.26    8.78   8-0.45441 0.45559 0.87566-0.52343 0.15504-0.72014
   0  13 -16  181.19    8.52   9-0.45268 0.45546 0.87458-0.36603 0.16605-0.81183
   0  15 -17    2.62    8.55   9-0.45368 0.45609 0.87521-0.28831 0.15975-0.84228
   1   1  -2  852.99   22.26   8-0.45449 0.49163 0.87571-0.83716 0.15450-0.23452
   1   1  10   77.42    9.00   9-0.45321 0.49053 0.87492-0.83506 0.16271 0.23982
   1   4  16 1093.34   10.20   8-0.45389 0.49159 0.87534-0.71716 0.15839 0.48899
   1   9  21  126.28    9.24   8-0.45434 0.49253 0.87562-0.52056 0.15546 0.69435
   1  10 -14   56.89    7.86   8-0.45388 0.49476 0.87534-0.48339 0.15842-0.72223
   1  10  22   12.30    9.42   8-0.45346 0.49049 0.87507-0.48029 0.16115 0.72432
   1  12 -15  124.55    8.33   9-0.45283 0.49303 0.87467-0.40461 0.16511-0.77039
   1  14 -16   -3.54    8.77   9-0.45368 0.50115 0.87521-0.31998 0.15975-0.80429
   1  17 -17   19.85   10.23   9-0.45383 0.49487 0.87531-0.20766 0.15877-0.84414
   1  18 -17  241.49   10.72   9-0.45254 0.49394 0.87449-0.16906 0.16692-0.85327
   2   1   7  834.62   11.69   8-0.45442 0.53049 0.87567-0.83538 0.15495 0.12799
   2   2  11 1866.23   11.55   8-0.45381 0.52950 0.87529-0.79563 0.15891 0.28598
   2   3  13 1039.50    7.95   8-0.45500 0.53083 0.87602-0.75685 0.15117 0.37475
   2   4  15  620.15    9.53   8-0.45387 0.52941 0.87533-0.71687 0.15851 0.44812
   2   7 -11 1351.86    8.68   8-0.45500 0.53153 0.87602-0.60195 0.15117-0.59539
   2  10  21  125.49    9.37   8-0.45432 0.53098 0.87561-0.48099 0.15558 0.69460
   2  11 -14   22.92    7.84   8-0.45420 0.53204 0.87553-0.44398 0.15640-0.72099
   2  13 -15  200.90    8.71   9-0.45380 0.53204 0.87529-0.36542 0.15894-0.76396
   2  16 -16   26.44    8.87   9-0.45286 0.53259 0.87470-0.24628 0.16489-0.81004
   3   2  -1  677.37   27.90   9-0.45129 0.56411 0.87365-0.79558 0.17464-0.21433
   3   2   9  664.45   10.02   9-0.45359 0.56680 0.87516-0.79547 0.16028 0.20307
   3   3  -4  503.81   13.08   8-0.45412 0.56740 0.87549-0.75816 0.15688-0.31768
   3   3  12  169.93    8.39   9-0.45316 0.56566 0.87489-0.75607 0.16304 0.32156
   3   4  -6  968.10   12.33   8-0.45407 0.56775 0.87545-0.71880 0.15724-0.39890
   3   4  14  270.25    8.57   9-0.45299 0.56603 0.87478-0.71650 0.16411 0.40145
   3   6  -9 1064.21    8.85   8-0.45513 0.56936 0.87610-0.64104 0.15031-0.51351
   3   7 -10 1457.94   10.89   8-0.45394 0.56839 0.87538-0.60094 0.15803-0.56114
   3   7  18  609.52    9.15   9-0.45285 0.56580 0.87469-0.59840 0.16496 0.56295
   3   8 -11   20.53    8.06   8-0.45431 0.56940 0.87561-0.56176 0.15565-0.59959
   3  11  21  184.74   10.81   8-0.45399 0.56781 0.87541-0.44153 0.15775 0.69176
   3  15 -15   55.33    8.44   9-0.45286 0.57012 0.87470-0.28570 0.16489-0.77049
   3  18 -16    8.64   10.21   8-0.45394 0.57128 0.87538-0.16778 0.15806-0.80376
   3  19 -16   71.62   10.32   9-0.45270 0.57059 0.87459-0.12790 0.16589-0.81160
   4   3  10 1501.67   11.29   9-0.45334 0.60435 0.87500-0.75578 0.16191 0.24218
   4   4  12  694.48    7.46   8-0.45513 0.60680 0.87610-0.71720 0.15031 0.33517
   4   5  14  516.91    8.82   8-0.45428 0.60602 0.87558-0.67751 0.15588 0.41062
   4   7  -9  352.77    9.22   8-0.45418 0.60663 0.87552-0.60085 0.15652-0.51938
   4   7  17  231.62    8.32   9-0.45283 0.60391 0.87467-0.59815 0.16512 0.52207
   4   8 -10  506.71    8.92   8-0.45378 0.60634 0.87528-0.56141 0.15910-0.56233
   4   8  18  212.65    8.29   9-0.45306 0.60420 0.87482-0.55868 0.16363 0.56393
   4   9 -11  122.00    7.65   8-0.45459 0.60724 0.87577-0.52262 0.15384-0.59781
   4  11  20   23.03    7.32   8-0.45487 0.60766 0.87594-0.44103 0.15202 0.65729
   4  12 -13   10.97    8.18   8-0.45388 0.60822 0.87534-0.40335 0.15846-0.68351
   4  12  21   54.43    9.83   9-0.45293 0.60543 0.87474-0.40105 0.16444 0.68459
   4  14 -14   38.61    8.68   9-0.45372 0.60831 0.87524-0.32479 0.15949-0.72425
   4  17 -15   12.04    9.84   9-0.45343 0.60815 0.87506-0.20675 0.16129-0.76669
   5   3   6 1296.55   12.17   8-0.45451 0.64419 0.87573-0.75678 0.15437 0.08819
   5   4  10  376.20    7.17   8-0.45520 0.64487 0.87613-0.71717 0.14988 0.25458
   5   6  14   64.54    6.04   8-0.45500 0.64437 0.87602-0.63858 0.15117 0.41462
   5   8  -9  298.89    8.52   8-0.45460 0.64481 0.87578-0.56207 0.15382-0.51675
   5   9 -10 1130.36    9.98   8-0.45471 0.64508 0.87584-0.52258 0.15311-0.55657
   5  12 -12   65.76    8.15   9-0.45279 0.64472 0.87465-0.40372 0.16532-0.64882
   5  12  20  196.34   10.29   8-0.45364 0.64315 0.87519-0.40149 0.15999 0.64895
   5  14 -13  376.65    8.78   9-0.45247 0.64438 0.87444-0.32526 0.16733-0.69204
   5  16 -14   42.08    9.18   8-0.45398 0.64664 0.87540-0.24568 0.15783-0.72229
   6   4   7   26.45    9.45   8-0.45420 0.68137 0.87554-0.71778 0.15639 0.12586
   6   7  14  186.29    6.26   8-0.45474 0.68252 0.87586-0.59877 0.15288 0.41307
   6  11  18   24.54    6.65   8-0.45513 0.68334 0.87610-0.44126 0.15031 0.57792
   6  12 -11   -1.60    7.67   9-0.45320 0.68950 0.87491-0.39710 0.16275-0.60524
   6  12  19   15.55    9.99   8-0.45362 0.68156 0.87518-0.40070 0.16012 0.60895
   6  14  20   18.46   10.84   9-0.45391 0.68317 0.87536-0.32211 0.15827 0.65267
   6  16 -13   37.51    9.15   9-0.45330 0.68451 0.87498-0.24591 0.16213-0.68634
   6  20 -14   28.56   10.78   9-0.45370 0.68448 0.87523-0.08850 0.15956-0.72406
   7   5   7  266.51    8.75   8-0.45468 0.72035 0.87582-0.67794 0.15331 0.12966
   7   8  -6   66.05    9.53   9-0.45199 0.71826 0.87413-0.55935 0.17031-0.41146
   7   8  14  419.82    9.29   8-0.45373 0.71909 0.87524-0.55898 0.15941 0.40688
   7   9  15  244.54    8.50   8-0.45463 0.72062 0.87579-0.52007 0.15362 0.45330
   7  10  16  234.55    6.77   8-0.45481 0.72052 0.87590-0.48097 0.15245 0.49491
   7  11  17    4.53    8.91   8-0.45421 0.71991 0.87554-0.44073 0.15632 0.53210
   7  12 -10  338.46    8.94   9-0.45365 0.72059 0.87519-0.40365 0.15993-0.56304
   7  12  18   97.20    9.23   9-0.45314 0.71907 0.87487-0.40081 0.16317 0.56407
   7  14  19   31.44   10.58   8-0.45386 0.72078 0.87533-0.32220 0.15857 0.61080
   7  16 -12   77.43    9.02   9-0.45317 0.72164 0.87489-0.24597 0.16295-0.64708
   7  19 -13   30.76    9.42   9-0.45408 0.72198 0.87546-0.12911 0.15714-0.68007
   7  20 -13    9.20   10.29   9-0.45333 0.72221 0.87500-0.08792 0.16194-0.68648
   8   6   7  191.05    8.67   9-0.45374 0.75707 0.87525-0.63784 0.15933 0.12413
   8   7  10   80.02    7.85   8-0.45429 0.75843 0.87559-0.59813 0.15578 0.24942
   8   8  12   56.10    8.60   8-0.45403 0.75820 0.87543-0.55887 0.15747 0.32860
   8  10  15  110.27    8.40   9-0.45285 0.75609 0.87469-0.47921 0.16499 0.44060
   8  13  17   52.93    7.04   8-0.45500 0.75996 0.87602-0.36175 0.15117 0.53639
   8  14 -10  143.81    8.51   9-0.45357 0.75888 0.87515-0.32504 0.16043-0.56380
   8  14  18   -7.33   10.62   9-0.45337 0.75198 0.87502-0.32324 0.16168 0.57135
   8  16 -11   15.99    8.72   9-0.45379 0.75937 0.87528-0.24538 0.15905-0.60247
   8  20 -12  121.42   10.82   9-0.45359 0.75994 0.87516-0.08829 0.16028-0.64436
   8  21 -12   24.14   10.88   9-0.45308 0.76054 0.87484-0.04793 0.16352-0.64804
   9   7   6  236.09    8.56   9-0.45347 0.79458 0.87508-0.59808 0.16104 0.08113
   9  10  -5  509.27   11.22   9-0.45251 0.79454 0.87447-0.48080 0.16709-0.36816
   9  10  13   97.56    8.36   9-0.45357 0.79474 0.87515-0.48022 0.16041 0.36508
   9  11  14   61.33    8.62   8-0.45410 0.79588 0.87548-0.44064 0.15701 0.40999
   9  12  -7  260.40   10.42   9-0.45155 0.79425 0.87383-0.40159 0.17305-0.45450
   9  12  15  507.35    9.83   8-0.45386 0.79566 0.87533-0.40192 0.15855 0.44864
   9  13  -8  148.05    8.59   9-0.45373 0.79655 0.87524-0.36357 0.15943-0.48194
   9  13  16  131.37    9.00   9-0.45320 0.79442 0.87491-0.36169 0.16277 0.48397
   9  15  17   21.65   10.37   8-0.45412 0.79617 0.87549-0.28294 0.15690 0.53175
   9  17 -10   34.68    8.83   9-0.45289 0.79706 0.87471-0.20532 0.16475-0.56782
   9  21 -11  110.92   11.01   9-0.45386 0.79755 0.87533-0.04946 0.15858-0.60174
  10  11  -4  109.33   10.90  10-0.45092 0.83100 0.87340-0.44011 0.17687-0.33728
  10  11  12  136.89    8.70   8-0.45377 0.83369 0.87527-0.44067 0.15913 0.32643
  10  12  13   62.88    7.99   8-0.45446 0.83504 0.87569-0.40081 0.15472 0.37154
  10  13  14  307.09    9.36   8-0.45424 0.83423 0.87556-0.36250 0.15612 0.41091
  10  14  -7  318.24   10.50   9-0.45286 0.83329 0.87470-0.32404 0.16490-0.44676
  10  14  15   69.29    9.33   9-0.45347 0.83380 0.87508-0.32113 0.16105 0.44511
  10  16  16   15.78   10.24   8-0.45399 0.83477 0.87541-0.24321 0.15774 0.49097
  10  18  -9   12.97    8.81   9-0.45348 0.83544 0.87509-0.16593 0.16101-0.52388
  11  10   6  337.93    9.34   9-0.45363 0.87099 0.87519-0.48023 0.16001 0.08303
  11  11   9  219.12    8.36   8-0.45377 0.87145 0.87527-0.44097 0.15915 0.20531
  11  12  11   53.59    8.03   9-0.45301 0.87014 0.87479-0.40058 0.16396 0.28021
  11  13  -4  325.93   12.37   9-0.45145 0.86943 0.87376-0.36171 0.17363-0.33405
  11  13  12  353.81    9.32   8-0.45366 0.87119 0.87520-0.36191 0.15986 0.32614
  11  14  -5  324.00   11.37   9-0.45237 0.87062 0.87437-0.32302 0.16799-0.36926
  11  14  13   70.11    9.11   9-0.45356 0.87141 0.87514-0.32167 0.16048 0.36570
  11  15  14   36.22   10.52   9-0.45222 0.87144 0.87428-0.28096 0.16888 0.39811
  11  17  -7  144.35    8.96   9-0.45367 0.87272 0.87521-0.20591 0.15978-0.44213
  11  17  15   44.20   10.29   9-0.45319 0.87131 0.87491-0.20286 0.16283 0.44395
  11  21  -8   74.05   12.17   9-0.45258 0.87163 0.87451-0.04814 0.16669-0.48827
  12  12   7  475.61   10.74   9-0.45212 0.90722 0.87421-0.40046 0.16954 0.11454
  12  13   9  249.20    8.70   9-0.45327 0.90825 0.87496-0.36175 0.16232 0.20197
  12  14  -2   45.84   15.77  12-0.44471 0.90130 0.86875-0.31711 0.21249-0.29245
  12  16  -4  124.68   12.58  10-0.45000 0.90702 0.87276-0.24213 0.18238-0.34309
  12  16  12   66.43    9.14   8-0.45406 0.91113 0.87545-0.24300 0.15730 0.32869
  12  17  13   18.21   10.73   9-0.45252 0.90927 0.87447-0.20277 0.16703 0.36007
  12  21  -6   54.53   12.08   9-0.45169 0.90921 0.87392-0.04663 0.17218-0.41415
  12  22  -6   35.83   13.95  10-0.45019 0.90705 0.87289-0.00652 0.18127-0.42170
  13  14   3  239.20   13.68  10-0.45012 0.94407 0.87284-0.32067 0.18170-0.05916
  13  14   4  578.06   14.03   9-0.45156 0.94549 0.87384-0.32153 0.17298-0.01015
  13  14   5  130.44   11.50   9-0.45172 0.94497 0.87394-0.32150 0.17200 0.03144
  13  15   8   51.92   10.18   9-0.45201 0.94554 0.87414-0.28214 0.17019 0.15372
  13  16   9  160.42    9.13   9-0.45343 0.94700 0.87506-0.24356 0.16132 0.20336
  13  17  10  200.14    9.98   9-0.45336 0.94703 0.87501-0.20413 0.16175 0.24331
  13  18  11    2.80   11.23   8-0.45298 0.94446 0.87477-0.16546 0.16414 0.28040
  13  19  11   -0.68   10.27   9-0.45381 0.94636 0.87530-0.12578 0.15889 0.29483
  14  18   6   92.68   12.29   9-0.45150 0.98320 0.87379-0.16365 0.17335 0.07054
  14  19   7   17.98   11.74   9-0.45200 0.98511 0.87413-0.12372 0.17027 0.11377
  14  20   8   -3.20   11.79   9-0.45204 0.98244 0.87416-0.08618 0.17003 0.16221
 -26   1   2    1.61   17.48  10-0.44789-0.53887 0.87119-0.83690 0.19530-0.11347
 -26   3  -5    3.14   10.62  10-0.45069-0.53242 0.87322-0.75892 0.17890-0.37991
 -25   1  -1   48.15   12.90  11-0.44729-0.49979 0.87074-0.83455 0.19867-0.23957
 -25   2  -4   65.76   11.71  10-0.44971-0.49685 0.87252-0.79784 0.18476-0.34684
 -25   3  -6   52.27   11.56  10-0.44948-0.49594 0.87236-0.75771 0.18608-0.42845
 -24   0   1  171.45   15.69  11-0.44573-0.46298 0.86953-0.87246 0.20740-0.16704
 -24   0   9   80.08   14.85  11-0.44701-0.46203 0.87053-0.87305 0.20024 0.16425
 -24   1  -3   78.08   11.24  10-0.44959-0.45832 0.87244-0.83620 0.18543-0.30706
 -24   3  -7  219.80   11.76  10-0.44974-0.45870 0.87255-0.75798 0.18454-0.46754
 -24   5 -10   35.69   10.81  10-0.45139-0.45478 0.87369-0.68059 0.17471-0.57731
 -23   3  -8   31.29    9.73  10-0.45086-0.41848 0.87334-0.75947 0.17787-0.50148
 -22  -1   2   33.24   17.38  13-0.43918-0.39325 0.86406-0.90689 0.24182-0.16127
 -22   0  12  116.90   12.10  10-0.44977-0.38235 0.87257-0.87436 0.18435 0.30182
 -22   2  -7   80.02   10.63  10-0.44912-0.38329 0.87210-0.79645 0.18817-0.47125
 -22   4 -10  133.21   10.45  10-0.45078-0.38095 0.87328-0.71972 0.17835-0.58315
 -22   5 -11  117.23    9.76  10-0.44991-0.38252 0.87267-0.67967 0.18353-0.62834
 -22   6 -12   20.98    9.80  10-0.44994-0.38216 0.87269-0.64085 0.18339-0.66799
 -21  -1  10   12.58   10.26  10-0.44935-0.34497 0.87226-0.91398 0.18687 0.21783
 -21   0  -4   -0.81    9.66   9-0.45105-0.34440 0.87346-0.87769 0.17676-0.33790
 -21   0  13   -1.91   10.73  10-0.44976-0.34566 0.87256-0.87473 0.18445 0.34175
 -21   1  -6   20.40    9.78  10-0.44962-0.34631 0.87246-0.83686 0.18523-0.42771
 -21   1  15   36.52   10.72   9-0.45106-0.34202 0.87347-0.83549 0.17668 0.43141
 -21   2  -8   73.21    9.13  10-0.45117-0.34230 0.87355-0.79787 0.17600-0.49942
 -20  -2   6  363.76   15.73  11-0.44568-0.31221 0.86950-0.95050 0.20765 0.03482
 -20  -1  -2  138.65   11.77  10-0.44896-0.30778 0.87198-0.91375 0.18912-0.27053
 -20  -1  11  198.95   11.07  10-0.45065-0.30732 0.87319-0.91441 0.17916 0.26611
 -20   1  -7   30.49    8.40  10-0.45133-0.30397 0.87366-0.83736 0.17505-0.45766
 -20   3 -10   13.43    9.22   9-0.45136-0.30462 0.87367-0.75909 0.17488-0.57790
 -20   4 -11  353.39    9.53  10-0.45039-0.30639 0.87301-0.71934 0.18068-0.62577
 -20   5 -12  152.90    9.49  10-0.44996-0.30647 0.87270-0.67953 0.18328-0.66869
 -20   6 -13   56.46    9.60  10-0.45057-0.30564 0.87313-0.64111 0.17964-0.70589
 -20   7 -14   22.82   10.75   9-0.45120-0.30404 0.87357-0.60196 0.17584-0.74013
 -19  -2   8  113.26   10.62  10-0.44987-0.26965 0.87264-0.95360 0.18378 0.13951
 -19  -1  -3   58.11    9.88  10-0.44962-0.26824 0.87246-0.91462 0.18526-0.30691
 -19  -1  12   28.93   10.30  10-0.45027-0.26897 0.87292-0.91428 0.18141 0.30457
 -19   2  -9  234.57    9.11  10-0.45081-0.26803 0.87330-0.79799 0.17819-0.54245
 -19   8 -15   27.36   10.59  10-0.45083-0.26706 0.87331-0.56268 0.17805-0.78384
 -18  -2   0   40.34   11.56  11-0.44607-0.23422 0.86980-0.95137 0.20552-0.20571
 -18   0  -6  401.03   10.31  10-0.44961-0.23177 0.87245-0.87506 0.18531-0.42804
 -18   0  15   31.63    9.17  10-0.45075-0.22943 0.87325-0.87436 0.17858 0.42805
 -18   1  -8  662.37    9.85  10-0.45114-0.23019 0.87353-0.83688 0.17619-0.49934
 -18   4 -12  190.68    9.36   9-0.45158-0.22868 0.87383-0.71946 0.17353-0.65782
 -18   5 -13  127.65    9.60   9-0.45144-0.22834 0.87373-0.67980 0.17442-0.69878
 -18   6 -14   98.17    7.09   9-0.45245-0.22762 0.87440-0.64198 0.16820-0.73384
 -18   9 -16   50.04   10.93  10-0.45111-0.22812 0.87350-0.52324 0.17639-0.82236
 -17  -2  -1   34.80   10.28  11-0.44720-0.19536 0.87067-0.95199 0.19919-0.24011
 -17   1  17   16.83   10.01   9-0.45142-0.19219 0.87372-0.83578 0.17450 0.51422
 -17   2 -10   25.51    8.10   9-0.45214-0.18910 0.87420-0.79879 0.17014-0.57334
 -17   3 -11  188.25    8.95  10-0.45050-0.19241 0.87308-0.75853 0.18003-0.62462
 -17   6 -14   84.23    9.69  10-0.45063-0.19168 0.87318-0.64046 0.17925-0.74526
 -17   7 -15   97.13    9.33   9-0.45190-0.18993 0.87404-0.60214 0.17159-0.77692
 -16  -2  11  139.71    9.46  10-0.45002-0.15591 0.87274-0.95261 0.18293 0.26182
 -16   0  -7 1471.14   11.45  10-0.45110-0.15455 0.87350-0.87605 0.17642-0.45927
 -16   2 -10  840.17    9.91  10-0.45044-0.15512 0.87304-0.79762 0.18039-0.58491
 -16   2  19   12.70    9.72  10-0.45042-0.15412 0.87303-0.79469 0.18051 0.58667
 -16   7 -15  180.49    9.52  10-0.45065-0.15401 0.87319-0.60154 0.17914-0.78522
 -16  10 -17    4.27   10.54  10-0.45112-0.14689 0.87351-0.47819 0.17633-0.86690
 -15  -3   6  385.50   10.76  10-0.44936-0.11902 0.87227-0.99168 0.18679 0.05573
 -15  -1  -5  457.54   10.89  10-0.44888-0.11882 0.87192-0.91338 0.18960-0.39189
 -15  -1  14  193.12    9.00  10-0.45090-0.11708 0.87336-0.91380 0.17763 0.38847
 -15   0  16   -0.90    8.89  10-0.45098-0.12315 0.87341-0.87546 0.17719 0.46681
 -15   1  -9   77.05    8.36   9-0.45149-0.11413 0.87377-0.83700 0.17406-0.53717
 -15   2  19   -5.82   10.29  10-0.45115-0.12352 0.87354-0.79745 0.17612 0.58996
 -15   8 -16  254.57    9.92   9-0.45134-0.11558 0.87366-0.56197 0.17499-0.82021
 -15  10 -17  141.63    9.84  10-0.45014-0.11636 0.87283-0.48267 0.18218-0.86902
 -14  -3   7  304.93   10.00  10-0.44981-0.08086 0.87260-0.99194 0.18413 0.09891
 -14  -1  14  641.92    9.76   9-0.45195-0.07863 0.87407-0.91493 0.17126 0.39506
 -14   0  16  883.05   10.12   9-0.45198-0.07866 0.87409-0.87538 0.17110 0.47611
 -14   1  -9   43.38    8.15  10-0.45057-0.07773 0.87313-0.83674 0.17965-0.54387
 -14   1  18  235.36    9.49  10-0.45008-0.07993 0.87279-0.83391 0.18254 0.54518
 -14   2  19  185.95    9.51   9-0.45214-0.07758 0.87420-0.79652 0.17014 0.59870
 -14   8 -16   81.03    9.63  10-0.45077-0.07701 0.87327-0.56187 0.17842-0.82473
 -13  -2  -3  394.44    9.43  10-0.45094-0.04103 0.87339-0.95417 0.17740-0.29849
 -13  -2  12   28.40    9.40  10-0.44989-0.04141 0.87266-0.95226 0.18365 0.30135
 -13   1  18   85.15    8.94  10-0.45070-0.04152 0.87322-0.83396 0.17888 0.54910
 -13   4 -13  135.84    6.25   9-0.45224-0.03916 0.87427-0.71989 0.16949-0.69433
 -13   5 -14  289.23    6.92   9-0.45259-0.03881 0.87449-0.68120 0.16735-0.73233
 -13   8 -16  133.54    8.93  10-0.45037-0.04021 0.87299-0.56150 0.18081-0.82752
 -13  11 -18  134.87    7.94   9-0.45231-0.03852 0.87431-0.44532 0.16906-0.89534
 -12  -2  -3  657.72   11.43  10-0.44991-0.00416 0.87267-0.95299 0.18356-0.30460
 -12  -2  12  138.81    8.35  10-0.45037-0.00416 0.87299-0.95222 0.18085 0.30381
 -12   1  18    9.53    8.88  10-0.45076-0.00387 0.87327-0.83443 0.17847 0.54970
 -12   3 -12  232.06    6.39   9-0.45259-0.00059 0.87449-0.75971 0.16735-0.65155
 -12   4 -13  292.61    8.18   9-0.45201-0.00126 0.87411-0.71958 0.17091-0.69562
 -12   5 -14  206.91    6.28   9-0.45245-0.00083 0.87440-0.68105 0.16820-0.73339
 -12   8 -16   24.82    8.34  10-0.45028-0.00290 0.87293-0.56119 0.18137-0.82864
 -12  11 -18   36.74    7.42   9-0.45231 0.00027 0.87431-0.44506 0.16906-0.89625
 -11  -3   7  257.57    8.56   9-0.45143 0.03502 0.87373-0.99312 0.17443 0.10874
 -11  -2  -3   37.11    7.82  10-0.45082 0.03646 0.87330-0.95370 0.17815-0.29973
 -11  -2  12   10.00    7.86  10-0.45029 0.03402 0.87293-0.95166 0.18131 0.30320
 -11   1  18   36.82    8.79  10-0.45067 0.03416 0.87320-0.83411 0.17902 0.54889
 -11   4 -13  531.86    7.01   9-0.45224 0.03649 0.87427-0.71986 0.16949-0.69425
 -11   5 -14 1085.31    8.21   9-0.45259 0.03693 0.87449-0.68095 0.16735-0.73244
 -11   8 -16   18.27    8.09  10-0.45044 0.03509 0.87304-0.56111 0.18041-0.82788
 -11  11 -18  137.71    7.38   9-0.45231 0.03714 0.87431-0.44485 0.16906-0.89554
 -10  -3   7  568.04    9.46  10-0.45057 0.07145 0.87313-0.99161 0.17965 0.10337
 -10  -1  14  330.69    8.73   9-0.45217 0.07347 0.87422-0.91434 0.16996 0.39598
 -10   0  16   61.88    8.02   9-0.45217 0.07467 0.87422-0.87422 0.16992 0.47769
 -10   1  -9 1001.84    9.62  10-0.45026 0.07207 0.87291-0.83594 0.18148-0.54510
 -10   1  18   33.66    8.31  10-0.45037 0.07290 0.87299-0.83357 0.18082 0.54569
 -10   2  19   56.26    6.82   9-0.45217 0.07449 0.87422-0.79605 0.16992 0.59884
 -10   8 -16   36.11    8.47  10-0.45075 0.07412 0.87326-0.56133 0.17853-0.82507
  -9  -3   6  638.43   11.34  10-0.45032 0.10923 0.87296-0.99158 0.18111 0.06158
  -9  -2  11   57.97    5.95   9-0.45245 0.11220 0.87440-0.95372 0.16820 0.27579
  -9  -1  14  253.73    8.93   9-0.45112 0.11012 0.87351-0.91342 0.17633 0.38921
  -9   0  16    7.78    8.55   9-0.45119 0.11041 0.87356-0.87357 0.17593 0.47167
  -9   1  -9  121.23    8.76   9-0.45136 0.11237 0.87368-0.83651 0.17485-0.53713
  -9   2  19  255.64    9.17   9-0.45137 0.11107 0.87369-0.79555 0.17479 0.59362
  -9   8 -16  267.47    8.86   9-0.45134 0.11173 0.87366-0.56162 0.17503-0.82055
  -9  12 -18   35.75    8.74  10-0.45057 0.11154 0.87313-0.40332 0.17965-0.90880
  -9  14 -19  147.09    9.96   9-0.45180 0.11280 0.87397-0.32688 0.17218-0.93879
  -8  -2  -2  475.10   13.81  10-0.44918 0.14706 0.87214-0.95202 0.18786-0.26810
  -8  -2  11  376.77    8.63  10-0.45058 0.14713 0.87314-0.95195 0.17955 0.26487
  -8  -1  -5 1163.25   12.00  10-0.45129 0.14891 0.87363-0.91448 0.17529-0.37649
  -8   0  -7  981.12   10.96  10-0.45074 0.14829 0.87325-0.87519 0.17859-0.46099
  -8   2  19  124.49    8.78  10-0.45048 0.14770 0.87307-0.79393 0.18017 0.58759
  -8   3  20   14.24    9.27   9-0.45154 0.14971 0.87380-0.75549 0.17377 0.63576
  -8   4  21   64.22    9.01   9-0.45203 0.15070 0.87413-0.71697 0.17077 0.67869
  -8   5  22   46.31    9.45   9-0.45177 0.14997 0.87395-0.67731 0.17237 0.71846
  -8   6  23   11.65   10.94   9-0.45121 0.14905 0.87358-0.63669 0.17576 0.75492
  -8   7 -15   84.03    8.26  10-0.45043 0.14908 0.87304-0.60084 0.18046-0.78603
  -8   8 -16   12.25    6.46   9-0.45259 0.15122 0.87449-0.56226 0.16735-0.81367
  -8  10 -17   77.59    8.74  10-0.45098 0.14979 0.87342-0.48328 0.17715-0.86316
  -8  12 -18   10.53    9.32  10-0.45110 0.15047 0.87350-0.40399 0.17644-0.90283
  -7  -2  10   53.26    8.22   9-0.45185 0.18783 0.87401-0.95326 0.17187 0.23200
  -7  -1  13  287.90    6.35   9-0.45231 0.18706 0.87431-0.91414 0.16906 0.35616
  -7   1  17  158.23    7.93   9-0.45182 0.18670 0.87399-0.83479 0.17206 0.51525
  -7   2 -10   37.05    6.26   9-0.45217 0.18845 0.87422-0.79844 0.16992-0.57229
  -7   3  20   45.70    8.52  10-0.45026 0.18513 0.87291-0.75471 0.18149 0.62714
  -7   4  21   22.13    9.38   9-0.45092 0.18618 0.87337-0.71513 0.17754 0.67165
  -7   5  22   98.47   10.21  10-0.45082 0.18646 0.87330-0.67581 0.17816 0.71115
  -7   6 -14  177.74    8.26  10-0.45036 0.18670 0.87299-0.63952 0.18088-0.74636
  -7   7 -15   86.88    8.31   9-0.45189 0.18874 0.87403-0.60159 0.17163-0.77678
  -7  10 -17   62.71    6.54   9-0.45238 0.18826 0.87436-0.48460 0.16863-0.85478
  -7  12 -18  109.74    6.82   9-0.45252 0.18933 0.87445-0.40592 0.16778-0.89457
  -7  15 -19   22.38    9.53   9-0.45165 0.18937 0.87387-0.28653 0.17309-0.93956
  -6  -2   9  483.38    7.53   9-0.45245 0.22538 0.87440-0.95329 0.16820 0.19520
  -6  -1  -4  535.42   11.94  10-0.45117 0.22469 0.87355-0.91425 0.17603-0.33651
  -6   0  15 1262.61   10.16   9-0.45103 0.22308 0.87345-0.87336 0.17687 0.42963
  -6   1  -8  158.55    9.67  10-0.45077 0.22444 0.87327-0.83608 0.17842-0.50073
  -6   2  18   -0.86    6.23   9-0.45245 0.21968 0.87440-0.79673 0.16820 0.56029
  -6   3 -11 1305.71    8.52   9-0.45266 0.22641 0.87454-0.75925 0.16692-0.61051
  -6   4 -12  361.23    8.76   9-0.45144 0.22514 0.87373-0.71871 0.17438-0.65828
  -6   5 -13  794.45    9.85   9-0.45143 0.22511 0.87373-0.67950 0.17443-0.69876
  -6   6 -14   17.41    5.94   9-0.45238 0.22655 0.87436-0.64143 0.16863-0.73345
  -6   9 -16   92.88    8.51  10-0.45098 0.22594 0.87341-0.52201 0.17718-0.82296
  -6  11 -17   60.41    8.07  10-0.45016 0.22411 0.87284-0.44286 0.18210-0.86860
  -6  13 -18  130.99    9.47  10-0.45099 0.22647 0.87342-0.36456 0.17711-0.90364
  -5  -2   8  207.45    9.72   9-0.45115 0.26251 0.87353-0.95246 0.17615 0.14649
  -5  -1  12  352.97    8.84   9-0.45114 0.26172 0.87353-0.91292 0.17618 0.30853
  -5   1  16   79.45    5.97   9-0.45259 0.26435 0.87449-0.83544 0.16735 0.47847
  -5   2  18    0.27    7.62  10-0.45019 0.26073 0.87287-0.79386 0.18189 0.54641
  -5   3  19   66.90    8.06   9-0.45189 0.26314 0.87403-0.75620 0.17163 0.59637
  -5   6  22  174.87    7.54   9-0.45231 0.26315 0.87431-0.63870 0.16906 0.72091
  -5   7  23   50.80   10.57   9-0.45121 0.26283 0.87357-0.59764 0.17580 0.75547
  -5   8 -15 1555.10   10.90  10-0.45053 0.26248 0.87310-0.56077 0.17986-0.78568
  -5  11 -17   52.37    6.10   9-0.45217 0.26556 0.87422-0.44423 0.16992-0.85606
  -5  14 -18   15.38    8.55  10-0.45012 0.26340 0.87282-0.32429 0.18232-0.90892
  -4  -2   3 1288.04   19.84  10-0.44962 0.29866 0.87246-0.95120 0.18527-0.06384
  -4  -2   5 2327.25   16.24   9-0.45118 0.30007 0.87355-0.95236 0.17596 0.02618
  -4  -1  11  148.99    9.16   9-0.45159 0.30064 0.87383-0.91304 0.17347 0.27004
  -4   0  -5  651.95   11.94  10-0.45065 0.29955 0.87319-0.87467 0.17915-0.38014
  -4   1  -7  110.38    9.17  10-0.45095 0.30012 0.87339-0.83605 0.17735-0.45882
  -4   3 -10 1491.51   11.16  10-0.45103 0.30025 0.87345-0.75712 0.17684-0.58018
  -4   4  20  132.09    9.19  10-0.45070 0.29869 0.87322-0.71477 0.17888 0.62966
  -4   5  21   92.34    9.26   9-0.45089 0.29994 0.87335-0.67545 0.17771 0.67115
  -4   6  22   26.93    9.06   9-0.45077 0.29992 0.87327-0.63595 0.17841 0.70876
  -4   7 -14  333.48    9.15  10-0.45110 0.30099 0.87350-0.60060 0.17644-0.74102
  -4  10 -16   73.64    8.29  10-0.45102 0.30209 0.87344-0.48223 0.17694-0.82266
  -4  12 -17   84.11    8.82  10-0.45091 0.30217 0.87337-0.40414 0.17759-0.86370
  -4  14 -18  287.03    7.73   9-0.45231 0.30256 0.87431-0.32641 0.16906-0.89584
  -3  -1  10  289.94    9.60  10-0.45085 0.33700 0.87333-0.91229 0.17793 0.22584
  -3   0  13    2.23    8.35  10-0.45078 0.33691 0.87328-0.87302 0.17834 0.34769
  -3   1  15    6.47    8.52  10-0.45117 0.33761 0.87355-0.83425 0.17601 0.43183
  -3   2  -8  190.59    9.47  10-0.45066 0.33833 0.87320-0.79646 0.17908-0.50072
  -3   3  18  322.61    6.77   9-0.45210 0.33823 0.87417-0.75613 0.17034 0.55698
  -3   7  22  127.75    7.45   9-0.45259 0.33927 0.87449-0.59923 0.16735 0.72282
  -3   8  23   50.28   10.65   9-0.45126 0.33910 0.87361-0.55808 0.17548 0.75520
  -3   9 -15   34.53    8.51  10-0.45090 0.33977 0.87336-0.52113 0.17767-0.78318
  -3  13 -17   17.71    8.30  10-0.45039 0.33931 0.87301-0.36333 0.18071-0.86798
  -3  15 -18   71.37    7.45   9-0.45231 0.34142 0.87431-0.28663 0.16906-0.89544
  -3  16 -18  148.96    9.61  10-0.45033 0.33983 0.87297-0.24656 0.18104-0.90789
  -2  -1   8 2321.79   13.65   9-0.45154 0.37579 0.87380-0.91286 0.17376 0.14938
  -2   0  12   50.01    8.56  10-0.45086 0.37483 0.87333-0.87287 0.17791 0.30665
  -2   1  14  316.80    6.72   9-0.45245 0.37627 0.87440-0.83472 0.16820 0.39741
  -2   2  16  110.54    8.53   9-0.45152 0.37602 0.87378-0.79530 0.17391 0.47150
  -2   3  -9 1187.00    8.95   9-0.45238 0.37748 0.87436-0.75826 0.16863-0.53104
  -2   4  19  418.03    9.06  10-0.45048 0.37392 0.87307-0.71478 0.18018 0.58780
  -2   5  20  243.01    9.42   9-0.45100 0.37454 0.87343-0.67626 0.17703 0.63142
  -2   6  21   -1.00    9.34  10-0.45094 0.36954 0.87339-0.63778 0.17740 0.67311
  -2   7 -13   80.64    8.27  10-0.45019 0.37628 0.87287-0.59967 0.18189-0.70632
  -2   7  22   81.72    9.36  10-0.45015 0.37440 0.87284-0.59698 0.18212 0.70707
  -2   8 -14  305.95    8.54   9-0.45184 0.37755 0.87400-0.56168 0.17196-0.73630
  -2  14 -17  149.88    9.00  10-0.45033 0.37704 0.87297-0.32456 0.18104-0.86774
  -2  17 -18   42.73   10.51   9-0.45113 0.37825 0.87352-0.20652 0.17628-0.90265
  -1   1  13  237.75    6.36   9-0.45245 0.41416 0.87440-0.83493 0.16820 0.35709
  -1   2  15   23.84    6.47   9-0.45245 0.41457 0.87440-0.79508 0.16820 0.43820
  -1   3  17  448.05    8.76  10-0.45060 0.41171 0.87315-0.75423 0.17945 0.50763
  -1   4  18   57.27    6.39   9-0.45217 0.41477 0.87422-0.71619 0.16992 0.55776
  -1   7  21  141.88    7.05   9-0.45259 0.41496 0.87449-0.59879 0.16735 0.68235
  -1   8  22   68.21   10.03   9-0.45147 0.41421 0.87375-0.55909 0.17420 0.71576
  -1   9 -14  513.41    8.52  10-0.45024 0.41408 0.87290-0.52058 0.18161-0.74674
  -1  12 -16  233.55    6.72   9-0.45245 0.41669 0.87440-0.40478 0.16820-0.81414
  -1  15 -17   15.99    9.45  10-0.45094 0.41576 0.87339-0.28482 0.17741-0.86397
   0   0   9   -2.51    8.68  10-0.45062 0.44768 0.87317-0.87270 0.17933 0.18529
   0   1  12 2055.24   11.49   9-0.45154 0.45121 0.87380-0.83394 0.17376 0.31146
   0   2  14  749.70    7.81   9-0.45259 0.45218 0.87449-0.79545 0.16735 0.39840
   0   3  16  261.93    8.71   9-0.45128 0.45107 0.87362-0.75532 0.17539 0.47109
   0   5 -10  441.08    9.51   9-0.45121 0.45242 0.87357-0.67829 0.17579-0.57843
   0   6 -11   10.10    8.51  10-0.45083 0.45208 0.87331-0.63818 0.17810-0.62281
   0   7 -12  733.56    9.47   9-0.45120 0.45235 0.87356-0.59978 0.17587-0.65980
   0   8 -13    2.25    6.08   9-0.45273 0.46022 0.87458-0.55555 0.16649-0.69235
   0   9  22  116.34    7.71   9-0.45245 0.45283 0.87440-0.51976 0.16820 0.72199
   0  10  23   21.49   10.87  10-0.45075 0.45138 0.87326-0.47806 0.17857 0.75125
   0  11 -15   -3.86    6.05   9-0.45266 0.46085 0.87454-0.43741 0.16692-0.77226
   0  16 -17    4.48    7.15   9-0.45231 0.45511 0.87431-0.24609 0.16906-0.85598
   0  17 -17   17.08    9.55   9-0.45082 0.45424 0.87331-0.20429 0.17812-0.86739
   1   2  13  565.32    8.76   9-0.45186 0.48942 0.87401-0.79465 0.17185 0.35333
   1   3  15  112.16    8.70   9-0.45139 0.48956 0.87369-0.75534 0.17471 0.43080
   1   4  -8 1481.62   10.14   9-0.45217 0.49068 0.87422-0.71845 0.16992-0.49183
   1   5  18  308.71    8.97  10-0.45076 0.48789 0.87326-0.67562 0.17850 0.54896
   1   6  19  241.83    8.90   9-0.45120 0.48889 0.87357-0.63722 0.17586 0.59235
   1   7  20  178.69    9.29   9-0.45113 0.48923 0.87352-0.59761 0.17628 0.63212
   1   8  21   67.34    9.02  10-0.45051 0.48899 0.87309-0.55712 0.18001 0.66836
   1   9 -13  237.39    8.51   9-0.45157 0.49100 0.87382-0.52127 0.17359-0.69782
   1  15 -16   18.71    9.21  10-0.45101 0.49155 0.87343-0.28450 0.17701-0.82324
   2   1   8 2332.97   13.51   9-0.45166 0.52717 0.87388-0.83409 0.17305 0.15001
   2   2  -3  844.48   17.21   9-0.45127 0.52641 0.87361-0.79589 0.17545-0.29542
   2   3  14   74.45    8.66  10-0.45085 0.52599 0.87333-0.75410 0.17795 0.38779
   2   4  -7 2640.97   12.93   9-0.45224 0.52842 0.87427-0.71823 0.16949-0.45106
   2   5  17  143.83    8.48   9-0.45114 0.52660 0.87352-0.67661 0.17622 0.51053
   2   6  18  190.40    6.67   9-0.45210 0.52820 0.87417-0.63750 0.17034 0.55715
   2   7  19   26.47    6.54   9-0.45231 0.52906 0.87431-0.59709 0.16906 0.59960
   2   8  20    9.25    8.67   9-0.45175 0.52861 0.87394-0.55725 0.17248 0.63728
   2   9  21   31.16    9.67   9-0.45095 0.52720 0.87340-0.51709 0.17735 0.67152
   2  10 -13  373.52    8.74   9-0.45139 0.52864 0.87369-0.48155 0.17471-0.69882
   2  11  22   45.42    8.26   9-0.45259 0.52995 0.87449-0.43967 0.16735 0.72281
   2  12 -14  273.33    8.64  10-0.44997 0.52759 0.87271-0.40209 0.18317-0.74828
   2  14 -15  208.78    9.11  10-0.45074 0.52899 0.87325-0.32445 0.17860-0.78423
   2  17 -16   98.27    9.90  10-0.45100 0.53024 0.87343-0.20577 0.17707-0.82270
   3   5  16  334.87    8.88   9-0.45099 0.56406 0.87342-0.67584 0.17713 0.46982
   3   6  17   -1.37    6.10   9-0.45238 0.56216 0.87436-0.63758 0.16863 0.52269
   3   8  19  350.31    7.03   9-0.45273 0.56656 0.87458-0.55905 0.16649 0.60203
   3   9  20  128.57    8.65   9-0.45189 0.56619 0.87403-0.51939 0.17163 0.63703
   3  10  21   14.70   10.30   9-0.45098 0.56459 0.87342-0.47733 0.17715 0.67062
   3  11 -13  628.78    7.40   9-0.45231 0.56751 0.87431-0.44313 0.16906-0.69371
   3  13 -14   53.39    8.89   9-0.45136 0.56714 0.87368-0.36330 0.17485-0.73911
   3  16 -15  198.90    9.09  10-0.45023 0.56687 0.87290-0.24463 0.18163-0.78678
   4   2   3 1265.72   15.81  10-0.45092 0.60209 0.87337-0.79428 0.17754-0.05624
   4   2   5 2274.82   15.47   9-0.45167 0.60291 0.87389-0.79492 0.17296 0.02892
   4   2   6  613.10   11.12  10-0.45068 0.60173 0.87321-0.79376 0.17895 0.06325
   4   4  13  205.05    8.69   9-0.45106 0.60253 0.87347-0.71505 0.17672 0.34821
   4   5  -6  634.87   11.09  10-0.45096 0.60312 0.87340-0.67749 0.17732-0.41886
   4   6  16  140.06    8.14   9-0.45183 0.60391 0.87399-0.63697 0.17201 0.47456
   4   9  19   55.15    6.80   9-0.45259 0.60513 0.87449-0.51853 0.16735 0.60083
   4  10  20   38.63    9.68   9-0.45140 0.60406 0.87370-0.47825 0.17462 0.63453
   4  11 -12   20.43    8.40  10-0.45086 0.60449 0.87334-0.44096 0.17786-0.66306
   4  15 -14  176.27    8.98  10-0.45081 0.60528 0.87330-0.28440 0.17816-0.74348
   4  18 -15    6.70    9.24   9-0.45181 0.60621 0.87398-0.16633 0.17215-0.77792
   4  19 -15   56.88   10.46  10-0.45044 0.60577 0.87304-0.12679 0.18043-0.78572
   5   3   1 2368.32   28.13  11-0.44805 0.63720 0.87132-0.75315 0.19435-0.15368
   5   3   7  138.03    7.60   9-0.45259 0.64124 0.87449-0.75602 0.16735 0.11467
   5   4  11  848.65    9.94   9-0.45147 0.64054 0.87375-0.71565 0.17421 0.27049
   5   5  13  594.94    7.08   9-0.45217 0.64133 0.87422-0.67668 0.16992 0.35547
   5   6  15  704.10    9.00  10-0.45064 0.63941 0.87318-0.63569 0.17920 0.42738
   5   7  16  143.20    8.13   9-0.45200 0.64157 0.87410-0.59786 0.17099 0.47607
   5   8  17   73.79    6.32   9-0.45266 0.64270 0.87454-0.55855 0.16692 0.52037
   5   9  18   56.10    6.56   9-0.45252 0.64288 0.87445-0.51932 0.16778 0.55946
   5  10  19   -3.90    8.74  10-0.45137 0.63762 0.87368-0.47931 0.17484 0.59989
   5  11 -11  449.94    8.79  10-0.44984 0.64110 0.87262-0.44060 0.18395-0.62785
   5  11  20   40.55    9.28  10-0.45069 0.64002 0.87321-0.43868 0.17892 0.62793
   5  13  21   11.06   11.49  10-0.45106 0.64243 0.87347-0.36002 0.17667 0.67416
   5  17 -14   44.33    8.95   9-0.45163 0.64341 0.87386-0.20584 0.17323-0.73743
   5  18 -14   31.84    9.10  10-0.45003 0.64307 0.87275-0.16445 0.18285-0.74812
   6   4   8  939.66   10.78   9-0.45159 0.67884 0.87383-0.71587 0.17349 0.14998
   6   5  11  290.44    6.55   9-0.45231 0.67948 0.87431-0.67680 0.16906 0.27542
   6   6  13  301.73    6.50   9-0.45245 0.67958 0.87440-0.63736 0.16820 0.35713
   6   7  -6    1.97    9.46   9-0.45095 0.68137 0.87339-0.59661 0.17738-0.42183
   6   7  15  145.24    7.81  10-0.45043 0.67758 0.87304-0.59600 0.18045 0.42584
   6   8  16   61.22    8.79   9-0.45139 0.67973 0.87369-0.55758 0.17471 0.47207
   6   9  17  226.51    8.61   9-0.45167 0.67983 0.87388-0.51857 0.17301 0.51462
   6  10  18   17.09    9.25  10-0.45115 0.67978 0.87353-0.47803 0.17614 0.55271
   6  11 -10   92.52    7.85  10-0.45004 0.67926 0.87276-0.44060 0.18280-0.58618
   6  11  19   57.38    8.99  10-0.45023 0.67895 0.87289-0.43757 0.18166 0.58641
   6  13  20   19.28   10.75   9-0.45140 0.68070 0.87371-0.35974 0.17460 0.63561
   6  14 -12  110.34    8.62   9-0.45159 0.68104 0.87383-0.32312 0.17347-0.65683
   6  17 -13   39.15    9.17  10-0.45084 0.68172 0.87332-0.20464 0.17802-0.70246
   7   5   8  429.92    9.19   9-0.45205 0.71722 0.87414-0.67681 0.17065 0.15274
   7   6  11  294.95    8.15   9-0.45203 0.71751 0.87412-0.63704 0.17082 0.27388
   7   7  13   31.09    8.12   9-0.45173 0.71745 0.87392-0.59730 0.17265 0.35238
   7   9  -7  375.17    9.18  10-0.45036 0.71695 0.87298-0.51931 0.18091-0.46340
   7   9  16  487.76    9.02  10-0.45033 0.71501 0.87297-0.51725 0.18104 0.46595
   7  10  -8  386.76    9.51  10-0.45025 0.71703 0.87291-0.47977 0.18154-0.50436
   7  10  17   58.71    8.56  10-0.45034 0.71587 0.87297-0.47759 0.18099 0.50548
   7  11  -9   56.02    8.19   9-0.45140 0.71842 0.87370-0.44068 0.17466-0.53720
   7  13  19   18.33   10.08   9-0.45115 0.71800 0.87353-0.35964 0.17615 0.59318
   7  14 -11  498.06    9.16   9-0.45189 0.71858 0.87403-0.32388 0.17165-0.61502
   7  17 -12  304.05    9.70  10-0.45043 0.71821 0.87304-0.20505 0.18046-0.66492
   8   6   8   21.35    8.16  10-0.45109 0.75457 0.87349-0.63626 0.17653 0.14717
   8   7  11   -2.74    7.70  10-0.45094 0.75247 0.87339-0.59594 0.17740 0.27275
   8   8  -4   46.87    9.69  10-0.44994 0.75363 0.87269-0.55801 0.18337-0.34418
   8   8  13   30.23    8.12  10-0.45050 0.75319 0.87308-0.55653 0.18006 0.34465
   8   9  14   -9.08    8.23  10-0.45151 0.75381 0.87378-0.51773 0.17398 0.39954
   8  11  16  139.33    6.70   9-0.45252 0.75669 0.87445-0.44024 0.16778 0.47943
   8  12  17   62.29    9.72   9-0.45151 0.75660 0.87378-0.39952 0.17397 0.51419
   8  13  -9  261.04    8.78  10-0.45010 0.75524 0.87280-0.36160 0.18241-0.54589
   8  13  18   82.77    9.34  10-0.45048 0.75432 0.87307-0.35900 0.18017 0.54665
   8  17 -11   40.72    8.86  10-0.45096 0.75661 0.87340-0.20434 0.17732-0.62102
   9   7   7 1299.22   11.11   9-0.45116 0.79239 0.87354-0.59718 0.17608 0.10753
   9   8  10  165.93    7.93   9-0.45205 0.79348 0.87414-0.55825 0.17068 0.23384
   9   9  12   62.99    8.20   9-0.45172 0.79395 0.87392-0.51811 0.17266 0.31174
   9  11  -6   66.96    7.85   9-0.45112 0.79327 0.87351-0.44079 0.17632-0.41814
   9  14  17   49.41   10.23   9-0.45131 0.79436 0.87364-0.32071 0.17516 0.51290
   9  15  -9   57.01    8.20   9-0.45145 0.79444 0.87374-0.28307 0.17433-0.53676
   9  18 -10   10.51    9.11  10-0.45012 0.79428 0.87282-0.16410 0.18232-0.58494
  10   8   4  946.74   12.73  10-0.44928 0.82845 0.87221-0.55644 0.18727-0.02476
  10   8   5  236.69   10.03  10-0.44945 0.82851 0.87234-0.55655 0.18626 0.01633
  10   9   9  220.14    8.37   9-0.45160 0.83119 0.87384-0.51847 0.17343 0.19097
  10  10  11  146.32    8.14   9-0.45190 0.83175 0.87404-0.47916 0.17156 0.27350
  10  11  13   69.30    8.12  10-0.45005 0.82902 0.87277-0.43812 0.18271 0.34223
  10  12  -5   66.65    9.48  10-0.44942 0.82976 0.87232-0.39952 0.18643-0.38771
  10  12  14  218.62    9.32  10-0.45051 0.82971 0.87309-0.39884 0.17996 0.38603
  10  13  -6  209.01   10.42  10-0.45040 0.83063 0.87302-0.36125 0.18062-0.42221
  10  13  15   12.50    8.61  10-0.45023 0.82916 0.87289-0.35952 0.18166 0.42422
  10  15  16    4.10   10.06   9-0.45168 0.83237 0.87389-0.28077 0.17291 0.47492
  10  16  -8  157.53    8.76  10-0.45126 0.83189 0.87361-0.24385 0.17548-0.49791
  10  19  -9   56.87    9.53  10-0.45108 0.83262 0.87349-0.12501 0.17656-0.53959
  10  20  -9   35.47   10.82  10-0.44896 0.83042 0.87199-0.08469 0.18911-0.55087
  11  10   1  160.04   16.13  12-0.44215 0.85980 0.86662-0.47290 0.22661-0.18581
  11  10   7   51.87    7.97   9-0.45131 0.86957 0.87364-0.47824 0.17518 0.10797
  11  11  10  406.96    9.06  10-0.45070 0.86770 0.87322-0.43874 0.17884 0.22603
  11  16  -6  134.25   10.15  10-0.44844 0.86748 0.87160-0.24168 0.19215-0.43398
  11  16  15   60.94   10.28  10-0.45088 0.86953 0.87335-0.24060 0.17776 0.42844
  11  18  -7   54.50   10.61  10-0.44935 0.86798 0.87227-0.16372 0.18683-0.46854
  12  12   8   11.81    9.30  10-0.44907 0.90574 0.87206-0.39775 0.18850 0.13540
  12  13  10   72.39    9.39  10-0.45002 0.90481 0.87275-0.35934 0.18290 0.22175
  12  14  11  384.68    9.45   9-0.45103 0.90658 0.87345-0.32115 0.17689 0.26857
  12  15  -3   96.89   12.90  11-0.44587 0.90224 0.86965-0.27864 0.20660-0.32729
  12  15  12   60.02    9.10   9-0.45104 0.90741 0.87346-0.28089 0.17682 0.30836
  12  16  13   65.74    8.97  10-0.45044 0.90595 0.87304-0.24140 0.18038 0.34438
  12  18  -5   26.22   11.18  10-0.44893 0.90607 0.87196-0.16192 0.18931-0.39037
  13  14   2   39.20   15.03  12-0.44430 0.93822 0.86840-0.31618 0.21518-0.13347
  13  14   6  141.70   10.37  10-0.45003 0.94416 0.87275-0.32014 0.18286 0.06025
  13  16  10  100.16   10.48  10-0.45015 0.94333 0.87284-0.24156 0.18214 0.22261
  13  17  11   81.57   10.83  10-0.44969 0.94334 0.87251-0.20141 0.18484 0.25996
  13  20  -3  166.38   16.71  12-0.44439 0.93847 0.86847-0.08039 0.21469-0.33578
  14  17   4   40.50   13.63  11-0.44676 0.97842 0.87034-0.19936 0.20166-0.03921
  14  18   7  150.71   11.58  10-0.44948 0.98108 0.87236-0.16255 0.18609 0.09826
  14  19   8   58.85   11.78  10-0.44969 0.98199 0.87251-0.12324 0.18483 0.13905
 -26   2  -2  114.15   12.19  11-0.44670-0.53841 0.87024-0.79528 0.20395-0.28354
 -25   0   4    0.04    5.60  10-0.44964-0.49062 0.87243-0.87242 0.18725-0.02486
 -24   2  -5   19.05   10.91  11-0.44719-0.45923 0.87061-0.79394 0.20124-0.40172
 -24   4  -8    7.17   11.38  11-0.44693-0.46169 0.87041-0.71644 0.20266-0.52539
 -23   0  -1    1.86   12.01  12-0.44526-0.42497 0.86911-0.87102 0.21184-0.25143
 -23   0  11   -1.94   10.98  10-0.44845-0.42102 0.87157-0.87250 0.19407 0.25124
 -23   1  -4   28.56   10.55  11-0.44787-0.42127 0.87113-0.83444 0.19737-0.35885
 -23   2  -6   30.92    9.74  11-0.44829-0.42168 0.87145-0.79595 0.19500-0.43725
 -23   4  -9   32.28   10.15  11-0.44851-0.42094 0.87161-0.71745 0.19373-0.55720
 -23   5 -10    5.68   11.13  12-0.44624-0.42065 0.86988-0.67523 0.20651-0.60779
 -23   6 -11   54.53   11.73  11-0.44717-0.42246 0.87060-0.63761 0.20132-0.64588
 -22  -1   9   21.54   11.83  11-0.44528-0.38692 0.86912-0.91026 0.21176 0.15301
 -22   1  -5  326.05   11.19  11-0.44809-0.38484 0.87129-0.83422 0.19617-0.39804
 -21   3  -9   34.01    9.00  11-0.44841-0.34565 0.87154-0.75637 0.19432-0.55743
 -21   7 -13   55.54   10.24  11-0.44778-0.34684 0.87107-0.59867 0.19788-0.72334
 -20  -2   7   89.41   13.10  12-0.44371-0.31324 0.86785-0.94836 0.22019 0.06344
 -20   0  14  290.90   10.70  10-0.44900-0.30857 0.87197-0.87408 0.19093 0.37626
 -20   1  16   65.75   11.11  10-0.44899-0.30684 0.87196-0.83455 0.19103 0.45826
 -20   2  -8   43.87   10.15  11-0.44713-0.30866 0.87057-0.79457 0.20155-0.52501
 -19  -2   2  137.68   17.64  15-0.43345-0.28610 0.85872-0.94017 0.27104-0.19007
 -19  -2   9  241.38   11.85  11-0.44572-0.27395 0.86947-0.94975 0.20933 0.15506
 -19   0  -5   -2.96    9.27  11-0.44674-0.27356 0.87027-0.87003 0.20372-0.41273
 -19   0  15    1.71    9.17  11-0.44789-0.27636 0.87115-0.87243 0.19727 0.40381
 -19   1  -7  212.75   10.16  11-0.44751-0.27108 0.87086-0.83414 0.19943-0.48258
 -19   3 -10  316.69    9.36  11-0.44847-0.27024 0.87158-0.75607 0.19399-0.59787
 -19   4 -11  678.42    9.82  11-0.44753-0.27151 0.87087-0.71666 0.19931-0.64401
 -19   5 -12   26.70    8.74  11-0.44733-0.27094 0.87072-0.67709 0.20042-0.68566
 -19   6 -13  153.34    9.89  11-0.44799-0.26991 0.87122-0.63850 0.19670-0.72206
 -19   7 -14   12.65    9.52  10-0.44920-0.26918 0.87211-0.60011 0.18981-0.75446
 -18  -2  10   44.99    9.77  11-0.44717-0.23432 0.87060-0.95095 0.20131 0.20393
 -18  -1  13    4.89    8.99  11-0.44879-0.23375 0.87182-0.91310 0.19215 0.33479
 -18   1  17    9.32    9.42  10-0.44932-0.23277 0.87220-0.83429 0.18912 0.49991
 -18   2  -9  349.96    9.30  11-0.44791-0.23318 0.87116-0.79557 0.19716-0.56102
 -18   8 -15   34.46   10.47  10-0.44881-0.23122 0.87183-0.55995 0.19205-0.79664
 -17  -2  11  141.71    9.61  11-0.44693-0.19702 0.87041-0.95028 0.20267 0.24217
 -17  -1  -4  170.19   10.53  11-0.44715-0.19531 0.87058-0.91199 0.20146-0.36321
 -17  -1  14   54.79    9.96  11-0.44663-0.19655 0.87018-0.91126 0.20436 0.36218
 -17   0  16   -2.74    8.74  11-0.44797-0.20099 0.87120-0.87258 0.19684 0.44527
 -17   1  -8    3.19    8.30  11-0.44830-0.19511 0.87146-0.83414 0.19493-0.51775
 -17   2  19   -3.19   11.08  11-0.44845-0.20235 0.87157-0.79527 0.19407 0.57135
 -17   4 -12   92.80    6.59  10-0.44993-0.19309 0.87264-0.71820 0.18554-0.66992
 -17   5 -13   32.03    6.46  10-0.44993-0.19175 0.87264-0.67843 0.18554-0.71048
 -17   9 -16   40.76    8.04  10-0.44978-0.19204 0.87254-0.52157 0.18640-0.83221
 -16  -3   5   76.24   12.44  12-0.44380-0.16128 0.86792-0.98724 0.21969-0.01681
 -16  -1  14  129.13    9.24  10-0.44916-0.15651 0.87208-0.91293 0.19004 0.37685
 -16   0  16  172.59    9.24  10-0.44960-0.15639 0.87240-0.87362 0.18749 0.46054
 -16   1  18   46.95   10.22  11-0.44799-0.15710 0.87122-0.83213 0.19673 0.53154
 -16   3 -11  303.17    9.10  10-0.44861-0.15652 0.87168-0.75597 0.19317-0.63705
 -16   4 -12   -6.37    8.60  11-0.44827-0.15378 0.87143-0.71222 0.19514-0.68620
 -16   5 -13   37.40    8.77  11-0.44831-0.15655 0.87146-0.67745 0.19488-0.71993
 -16   6 -14   48.50    8.37  10-0.44911-0.15495 0.87205-0.63861 0.19033-0.75488
 -16   9 -16   68.65    9.89  11-0.44835-0.15566 0.87149-0.52012 0.19464-0.84064
 -16  11 -17   43.73   10.20  11-0.44793-0.15663 0.87117-0.44101 0.19708-0.88442
 -15  -3   7  257.97    9.87  11-0.44690-0.12137 0.87039-0.98957 0.20284 0.08054
 -15  -2  -2  369.57   10.64  11-0.44613-0.12194 0.86980-0.95067 0.20708-0.28757
 -15  -2  12  293.88    8.97  11-0.44776-0.12051 0.87105-0.95033 0.19801 0.28686
 -15   0  -7   -5.67    8.13  11-0.44883-0.11724 0.87184-0.87014 0.19194-0.48035
 -15   1  18   69.25    9.69  10-0.44912-0.11784 0.87206-0.83376 0.19025 0.53887
 -15   2 -10  173.47    8.67  10-0.44867-0.11848 0.87173-0.79528 0.19284-0.59599
 -15   6 -14  248.57    9.46  11-0.44811-0.11848 0.87131-0.63849 0.19604-0.76151
 -15   7 -15  108.51    6.80  10-0.44971-0.11738 0.87249-0.60003 0.18682-0.79229
 -14  -3   8   30.36    9.28  11-0.44706-0.08177 0.87051-0.98934 0.20196 0.12103
 -14  -2  12  178.42    8.51  10-0.44896-0.08094 0.87194-0.95201 0.19118 0.29465
 -14  -1  -5  470.30   10.50  11-0.44687-0.08290 0.87037-0.91148 0.20299-0.40461
 -14  -1  15   33.07    8.23  11-0.44727-0.08195 0.87068-0.91015 0.20076 0.40542
 -14   0  -7  415.48    8.92  11-0.44763-0.08176 0.87095-0.87340 0.19876-0.48163
 -14   2 -10   27.56    8.17  11-0.44786-0.08163 0.87112-0.79509 0.19744-0.60229
 -14   3  21  126.80   10.73  11-0.44792-0.08324 0.87117-0.75384 0.19709 0.65106
 -14   7 -15  128.35    9.47  10-0.44866-0.07992 0.87172-0.59902 0.19290-0.79766
 -14  10 -17   36.17    7.39  10-0.44956-0.07894 0.87238-0.48169 0.18768-0.87350
 -13  -3   8  317.71    8.80  10-0.44843-0.04429 0.87155-0.99055 0.19422 0.12940
 -13  -1  15  124.57    8.80  11-0.44791-0.04465 0.87116-0.91099 0.19717 0.40906
 -13   0  17   -6.15    8.39  11-0.44793-0.04974 0.87117-0.87196 0.19706 0.48613
 -13   1  -9   15.87    5.81  10-0.44986-0.04196 0.87259-0.83568 0.18597-0.54890
 -13   3  21   47.73   11.13  10-0.44835-0.04312 0.87149-0.75359 0.19467 0.65507
 -13   7 -15   37.32    8.54  11-0.44829-0.04256 0.87145-0.59878 0.19501-0.80066
 -13  10 -17   37.45    8.88  10-0.44910-0.04135 0.87204-0.48158 0.19037-0.87612
 -13  12 -18   25.70    9.73  10-0.44949-0.04125 0.87233-0.40338 0.18810-0.91467
 -12  -3   8  116.24    8.15  10-0.44874-0.00555 0.87178-0.99113 0.19242 0.13150
 -12  -1  15  130.45    8.47  11-0.44821-0.00563 0.87138-0.91126 0.19549 0.41057
 -12   0  17   12.50    8.34  11-0.44773-0.00702 0.87102-0.87134 0.19819 0.48946
 -12   1  -9  174.33    7.82  10-0.44927-0.00423 0.87217-0.83476 0.18937-0.55176
 -12   2  20  131.34    9.43  11-0.44739-0.00668 0.87076-0.79265 0.20013 0.60857
 -12   3  21   55.62   10.56  10-0.44853-0.00506 0.87162-0.75379 0.19366 0.65607
 -12   4  22   89.58   11.69  10-0.44873-0.00366 0.87177-0.71517 0.19250 0.69796
 -12   7 -15  115.14    8.65  11-0.44811-0.00460 0.87131-0.59887 0.19605-0.80166
 -12  10 -17   97.35    9.35  10-0.44879-0.00463 0.87181-0.48075 0.19216-0.87751
 -12  12 -18    8.51    9.24  10-0.44920-0.00340 0.87211-0.40281 0.18981-0.91583
 -11  -3   8  118.30    8.35  10-0.44859 0.03233 0.87167-0.99067 0.19327 0.13029
 -11  -1  15    7.12    8.28  10-0.44828 0.03175 0.87144-0.91034 0.19505 0.41114
 -11   0  17   -7.68    8.12  11-0.44800 0.02592 0.87123-0.87206 0.19663 0.48735
 -11   1  -9  361.52    6.58  10-0.44978 0.03360 0.87254-0.83544 0.18640-0.54958
 -11   2  20   77.29    9.23  11-0.44746 0.03188 0.87082-0.79197 0.19972 0.60849
 -11   3  21   11.17   10.15  11-0.44835 0.03163 0.87149-0.75357 0.19466 0.65544
 -11   4  22    5.00   10.72  10-0.44859 0.03207 0.87167-0.71460 0.19328 0.69769
 -11   7 -15  264.29    8.92  11-0.44824 0.03292 0.87141-0.59913 0.19529-0.80075
 -11  10 -17  112.12    8.75  10-0.44898 0.03383 0.87195-0.48105 0.19106-0.87668
 -11  12 -18  208.64    9.43  10-0.44943 0.03403 0.87228-0.40319 0.18849-0.91502
 -10  -3   8  728.06   10.13  11-0.44777 0.06886 0.87106-0.98933 0.19794 0.12543
 -10  -2  12  411.54    8.68  10-0.44942 0.07036 0.87227-0.95160 0.18854 0.29716
 -10  -1  15  727.87    9.33  11-0.44738 0.06817 0.87076-0.91046 0.20017 0.40620
 -10   3  21   73.48   10.00  11-0.44822 0.07064 0.87139-0.75252 0.19542 0.65344
 -10   4  22   19.45   10.53  11-0.44837 0.06973 0.87150-0.71385 0.19456 0.69558
 -10   7 -15   22.42    8.52  10-0.44860 0.07105 0.87167-0.59834 0.19327-0.79882
 -10  10 -17  305.48    7.24  10-0.44949 0.07145 0.87233-0.48112 0.18810-0.87435
 -10  12 -18   59.88    7.29  10-0.44978 0.07253 0.87254-0.40304 0.18640-0.91283
  -9  -3   7  265.24    8.69  11-0.44830 0.10773 0.87145-0.98982 0.19494 0.08820
  -9  -2  12  212.93    8.53  11-0.44828 0.10740 0.87144-0.95033 0.19504 0.28973
  -9  -1  -5  397.14    9.94  11-0.44851 0.10863 0.87161-0.91251 0.19376-0.39501
  -9   0  -7   -7.43    8.75  10-0.44860 0.10786 0.87168-0.87329 0.19322-0.47585
  -9   1  18    3.34    8.07  10-0.44956 0.10892 0.87238-0.83306 0.18768 0.54063
  -9   2 -10   99.20    8.40  11-0.44844 0.10951 0.87156-0.79506 0.19415-0.59734
  -9   4  22   15.24    9.18  11-0.44755 0.10628 0.87089-0.71324 0.19919 0.69143
  -9   5  23   20.21   10.25  11-0.44740 0.10647 0.87077-0.67352 0.20005 0.73016
  -9   6 -14  729.14    9.00  11-0.44767 0.10783 0.87098-0.63753 0.19851-0.76356
  -9   7 -15   97.21    8.15  10-0.44937 0.11015 0.87224-0.59971 0.18880-0.79328
  -9  10 -17  121.25    6.51  10-0.45029 0.11019 0.87290-0.48208 0.18341-0.86976
  -9  13 -18   47.51    9.10  11-0.44778 0.10852 0.87106-0.36134 0.19791-0.92656
  -8  -3   4  163.47   11.27  11-0.44621 0.14432 0.86985-0.98816 0.20667-0.04500
  -8  -3   5  618.67   12.20  11-0.44721 0.14460 0.87063-0.98908 0.20109 0.00129
  -8  -1  14  102.78    5.74  10-0.44978 0.14744 0.87254-0.91241 0.18640 0.37942
  -8   0  16  676.06    7.46  10-0.45015 0.14640 0.87280-0.87297 0.18426 0.46317
  -8   1  18  500.38    9.53  10-0.44839 0.14496 0.87152-0.83222 0.19442 0.53324
  -8   2 -10  152.92    6.43  10-0.45022 0.14815 0.87285-0.79622 0.18384-0.58724
  -8   3 -11   59.03    8.28  11-0.44820 0.14653 0.87138-0.75588 0.19551-0.63877
  -8   4 -12  863.97    9.38  11-0.44759 0.14571 0.87092-0.71610 0.19898-0.68330
  -8   5 -13   39.54    8.75  11-0.44785 0.14701 0.87112-0.67779 0.19748-0.72108
  -8   6 -14  122.95    8.72  10-0.44882 0.14687 0.87184-0.63776 0.19199-0.75676
  -8   9 -16  359.92    8.85  11-0.44814 0.14662 0.87134-0.52040 0.19584-0.84182
  -8  11 -17  124.06    8.77  11-0.44740 0.14682 0.87077-0.44032 0.20004-0.88628
  -8  13 -18  102.37    9.51  11-0.44848 0.14701 0.87158-0.36323 0.19395-0.92049
  -7  -2  11 1130.44   10.11  11-0.44822 0.18273 0.87139-0.95015 0.19541 0.24923
  -7  -1  14   25.36    8.17  11-0.44783 0.18291 0.87110-0.91045 0.19761 0.36830
  -7   0  16    8.21    7.94  11-0.44839 0.18292 0.87152-0.87135 0.19445 0.45294
  -7   1  -8  533.16    9.64  11-0.44746 0.18322 0.87082-0.83337 0.19970-0.52194
  -7   2  19   77.76    8.54  10-0.44912 0.18436 0.87206-0.79377 0.19024 0.57764
  -7   3 -11  293.88    6.50  10-0.45022 0.18547 0.87285-0.75664 0.18384-0.62754
  -7   4 -12  887.55    9.75  10-0.44925 0.18450 0.87215-0.71633 0.18951-0.67352
  -7   5 -13  702.81    7.53  10-0.44964 0.18499 0.87243-0.67780 0.18725-0.71218
  -7   6  23    4.32    7.99  10-0.45037 0.17917 0.87295-0.63864 0.18298 0.74689
  -7   9 -16  463.73    7.33  10-0.44949 0.18502 0.87233-0.52052 0.18810-0.83411
  -7  11 -17   17.36    8.68  11-0.44863 0.18518 0.87170-0.44065 0.19308-0.87887
  -7  13 -18   82.53    6.94  10-0.44978 0.18653 0.87254-0.36350 0.18640-0.91317
  -6  -2  10  244.70    9.27  10-0.44881 0.22177 0.87183-0.95079 0.19202 0.21209
  -6  -1  13  218.73    6.19  10-0.45008 0.22246 0.87275-0.91209 0.18469 0.34126
  -6   0  -6   26.58    9.03  10-0.44864 0.22280 0.87170-0.87325 0.19304-0.43347
  -6   1  17 1375.32    8.39  10-0.45015 0.22230 0.87280-0.83342 0.18426 0.50358
  -6   3  20    0.95    8.78  10-0.44875 0.22194 0.87179-0.75344 0.19237 0.61694
  -6   4  21   13.31    8.92  11-0.44879 0.22118 0.87182-0.71472 0.19213 0.66167
  -6   5  22   35.43    9.47  10-0.44949 0.22351 0.87233-0.67520 0.18810 0.70123
  -6   6  23   95.83   10.98  10-0.44862 0.22302 0.87169-0.63575 0.19315 0.73737
  -6   8 -15  193.96    8.82  11-0.44843 0.22309 0.87155-0.55907 0.19419-0.79906
  -6  14 -18    6.41    9.50  10-0.44858 0.22335 0.87166-0.32277 0.19338-0.92016
  -5  -2   9  564.67   10.06  11-0.44837 0.25901 0.87150-0.94997 0.19458 0.16903
  -5  -1  -3 1747.74   16.90  11-0.44764 0.25969 0.87095-0.91137 0.19870-0.31871
  -5   0  15    7.74    8.11  11-0.44838 0.25847 0.87151-0.87177 0.19450 0.41323
  -5   1  17  206.73    8.43  11-0.44780 0.25802 0.87108-0.83156 0.19780 0.48926
  -5   2  -9  552.05    7.89  10-0.45022 0.26127 0.87285-0.79575 0.18384-0.54661
  -5   4  21   74.59    8.75  11-0.44748 0.25856 0.87083-0.71320 0.19961 0.64953
  -5   5  22    7.53    9.11  10-0.44844 0.25990 0.87156-0.67340 0.19414 0.69022
  -5   7 -14  200.44    8.48  11-0.44856 0.26005 0.87164-0.59874 0.19350-0.75802
  -5  10 -16   71.82    8.49  10-0.44870 0.26092 0.87175-0.48028 0.19266-0.83787
  -5  12 -17   23.86    8.74  11-0.44857 0.26087 0.87166-0.40092 0.19339-0.87862
  -5  15 -18   45.96   10.37  11-0.44807 0.26131 0.87128-0.28338 0.19627-0.92310
  -4  -2   6  587.77    9.11  10-0.45022 0.29891 0.87285-0.95151 0.18384 0.05906
  -4  -2   7  268.51   10.11  11-0.44825 0.29712 0.87141-0.94987 0.19526 0.08720
  -4  -1  12  313.72    8.72  11-0.44764 0.29620 0.87096-0.90998 0.19867 0.28602
  -4   0  14  726.16    7.30  10-0.45022 0.29833 0.87285-0.87287 0.18384 0.38276
  -4   1  16  526.42    6.92  10-0.45008 0.29817 0.87275-0.83327 0.18469 0.46265
  -4   2  18  350.46    8.91  11-0.44806 0.29596 0.87128-0.79212 0.19630 0.53122
  -4   3  19  115.12    6.50  10-0.44986 0.29850 0.87259-0.75410 0.18597 0.58263
  -4   4 -11   20.94    6.05  10-0.44986 0.29997 0.87259-0.71760 0.18597-0.62882
  -4   5 -12  959.92    7.80  10-0.44949 0.29868 0.87233-0.67741 0.18810-0.67258
  -4   6 -13  230.58    6.78  10-0.45015 0.29953 0.87280-0.63873 0.18426-0.70910
  -4   7  23   20.38    7.54  10-0.44956 0.29901 0.87238-0.59634 0.18768 0.74321
  -4   9 -15  145.40    8.39  11-0.44820 0.29881 0.87138-0.51993 0.19552-0.80066
  -4  13 -17   88.32    8.94  11-0.44808 0.29869 0.87128-0.36225 0.19623-0.88333
  -4  15 -18  112.00    7.37  10-0.45015 0.30053 0.87280-0.28495 0.18426-0.91059
  -4  16 -18   91.93   10.20  11-0.44808 0.29938 0.87129-0.24413 0.19620-0.92274
  -3   0  -4    4.17   13.08  10-0.44851 0.33558 0.87161-0.87261 0.19377-0.35401
  -3   2  17  123.05    6.19  10-0.45022 0.33646 0.87285-0.79391 0.18384 0.50358
  -3   4  20  148.67    9.03  11-0.44829 0.33476 0.87145-0.71363 0.19500 0.61299
  -3   5  21  145.35    9.48  10-0.44855 0.33488 0.87164-0.67480 0.19351 0.65546
  -3   6  22  173.94    9.81  10-0.44836 0.33467 0.87149-0.63470 0.19464 0.69451
  -3   8 -14   91.85    8.64  11-0.44852 0.33654 0.87161-0.55878 0.19371-0.75832
  -3  11 -16   -0.91    6.06  10-0.44993 0.34431 0.87264-0.43576 0.18554-0.83198
  -3  14 -17  162.57    9.05  11-0.44775 0.33637 0.87104-0.32269 0.19809-0.88510
  -3  17 -18    2.59   10.30  11-0.44845 0.33693 0.87157-0.20398 0.19407-0.91952
  -2  -1   9  451.28    9.92  10-0.44855 0.37276 0.87164-0.91093 0.19352 0.16975
  -2   1  15   84.26    8.55  11-0.44789 0.37208 0.87114-0.83153 0.19731 0.40885
  -2   2  -7 2957.62   14.64  11-0.44759 0.37262 0.87092-0.79381 0.19898-0.48032
  -2   3  18  141.18    8.29  10-0.44914 0.37333 0.87207-0.75405 0.19015 0.53758
  -2   4 -10  752.56    7.87  10-0.45015 0.37501 0.87280-0.71696 0.18426-0.58767
  -2   5 -11   93.41    8.47  10-0.44896 0.37399 0.87194-0.67681 0.19116-0.63420
  -2   6 -12  499.97    8.72  10-0.44928 0.37424 0.87218-0.63766 0.18931-0.67349
  -2   8  23   14.04    9.88  10-0.44905 0.37431 0.87201-0.55633 0.19066 0.74001
  -2  10 -15   30.41    5.97  10-0.44964 0.37567 0.87243-0.48073 0.18725-0.79266
  -2  12 -16  135.82    8.37  10-0.44909 0.37526 0.87203-0.40185 0.19045-0.83565
  -2  15 -17   77.78    9.48  11-0.44805 0.37546 0.87126-0.28332 0.19639-0.88284
  -1  -1   4 3111.05   21.21  11-0.44794 0.41063 0.87118-0.91000 0.19700-0.03599
  -1  -1   5  700.23   14.14  11-0.44841 0.41100 0.87153-0.91044 0.19432 0.00708
  -1  -1   6  341.69   11.83  11-0.44758 0.41003 0.87091-0.90986 0.19902 0.04237
  -1   0  11   -1.79    6.22  10-0.44986 0.40865 0.87259-0.87306 0.18597 0.26068
  -1   1  14   41.35    8.74  11-0.44827 0.41007 0.87143-0.83166 0.19511 0.37033
  -1   2  16   45.17    8.40  11-0.44792 0.40979 0.87117-0.79150 0.19712 0.44997
  -1   3  -8  464.08    7.71  10-0.44993 0.41250 0.87264-0.75602 0.18554-0.50786
  -1   5  20  117.60    9.31  11-0.44815 0.41000 0.87134-0.67357 0.19578 0.61244
  -1   6  21    6.14    9.30  11-0.44800 0.41007 0.87123-0.63402 0.19663 0.65330
  -1   8 -13   11.99    8.09  10-0.44835 0.41188 0.87149-0.55780 0.19468-0.72079
  -1   9  23   83.11    8.04  10-0.45037 0.41268 0.87295-0.51804 0.18298 0.74735
  -1  11 -15  336.04    8.95  10-0.44867 0.41241 0.87173-0.44050 0.19284-0.79774
  -1  13 -16  287.41    8.72  10-0.44904 0.41278 0.87200-0.36223 0.19070-0.83605
  -1  16 -17   82.89    9.45  10-0.44871 0.41342 0.87175-0.24356 0.19262-0.87772
   0   1  13    8.78    7.93  11-0.44755 0.44720 0.87089-0.83077 0.19919 0.32672
   0   2  15   -6.05    8.43  11-0.44830 0.44384 0.87146-0.79287 0.19493 0.41371
   0   3  -7    4.64    9.82  10-0.44845 0.44922 0.87157-0.75414 0.19407-0.47846
   0   4  18  606.85    9.36  10-0.44862 0.44827 0.87169-0.71389 0.19315 0.53493
   0   5  19   -6.16    6.20  10-0.44971 0.44501 0.87249-0.67644 0.18682 0.58410
   0   6  20   43.14    6.64  10-0.45008 0.44986 0.87275-0.63627 0.18469 0.62418
   0   7  21   -3.16    6.91  10-0.44971 0.44465 0.87249-0.59786 0.18682 0.66464
   0   8  22   50.82   10.04  10-0.44862 0.44919 0.87169-0.55635 0.19315 0.69691
   0  10 -14  461.20    6.74  10-0.44964 0.45092 0.87243-0.48050 0.18725-0.75242
   0  12 -15    1.87    8.42  10-0.44875 0.45035 0.87179-0.40087 0.19237-0.79810
   0  14 -16   78.36    6.43  10-0.44986 0.45286 0.87259-0.32343 0.18597-0.83118
   0  18 -17    0.41   10.61  11-0.44872 0.45720 0.87176-0.15994 0.19258-0.87524
   1   0   4   -2.21   14.88  11-0.44872 0.48652 0.87176-0.87192 0.19258-0.02744
   1   0   5    1.80   12.46  10-0.44927 0.48718 0.87217-0.87181 0.18938 0.01291
   1   0   6   -4.01   10.97  11-0.44842 0.48503 0.87154-0.87155 0.19429 0.05094
   1   1  11  809.26    7.91  10-0.44964 0.48726 0.87243-0.83251 0.18725 0.25771
   1   2  14  287.58    8.90  11-0.44759 0.48507 0.87092-0.79173 0.19896 0.36689
   1   4  17  119.68    8.43  10-0.44937 0.48739 0.87224-0.71423 0.18883 0.49896
   1   5  -9  404.41    7.37  10-0.44956 0.48820 0.87238-0.67700 0.18768-0.55040
   1   6 -10  356.37    9.26  11-0.44843 0.48736 0.87155-0.63712 0.19423-0.59694
   1   7 -11  126.37    8.59  10-0.44861 0.48763 0.87168-0.59759 0.19317-0.63642
   1   8 -12  102.31    5.92  10-0.44993 0.48877 0.87264-0.55911 0.18554-0.66973
   1   9  22   53.03    9.29  10-0.44914 0.48842 0.87207-0.51688 0.19015 0.70091
   1  10  23   10.77   10.14  11-0.44790 0.48583 0.87115-0.47649 0.19725 0.73079
   1  11 -14  235.65    6.27  10-0.44956 0.48904 0.87238-0.44101 0.18768-0.75277
   1  13 -15  199.80    8.66  10-0.44945 0.48920 0.87230-0.36212 0.18834-0.79373
   1  16 -16   39.78    9.48  10-0.44861 0.48866 0.87168-0.24298 0.19320-0.83830
   2   1   9  454.75    9.78  10-0.44881 0.52463 0.87183-0.83213 0.19206 0.17118
   2   2  12  205.07    6.41  10-0.45022 0.52562 0.87285-0.79349 0.18384 0.30135
   2   3  -5 2795.63   16.82  10-0.44886 0.52477 0.87187-0.75459 0.19173-0.39260
   2   4  16  718.54    7.44  10-0.44942 0.52493 0.87227-0.71463 0.18853 0.45860
   2   5  -8  419.00   10.27  11-0.44840 0.52490 0.87153-0.67638 0.19438-0.51615
   2   8 -11   10.81    7.58  10-0.44805 0.52582 0.87126-0.55646 0.19638-0.64325
   2   9 -12  329.95    8.09  10-0.44927 0.52623 0.87217-0.51903 0.18938-0.67358
   2  10  22    1.58    9.85  11-0.44897 0.52046 0.87195-0.47902 0.19109 0.70477
   2  15 -15   90.50    8.89  11-0.44800 0.52660 0.87123-0.28195 0.19664-0.80231
   2  18 -16   88.70    9.69  10-0.44946 0.52759 0.87230-0.16535 0.18829-0.83363
   2  19 -16   40.88   10.95  11-0.44825 0.52711 0.87141-0.12472 0.19524-0.84099
   3   2  10  430.01    7.47  10-0.45037 0.56385 0.87295-0.79359 0.18298 0.22151
   3   3  13  202.10    8.66  10-0.44899 0.56258 0.87196-0.75375 0.19102 0.33461
   3   4  15   43.50    8.78  10-0.44872 0.56260 0.87176-0.71417 0.19254 0.41227
   3   5  -7  561.39   10.61  11-0.44852 0.56266 0.87162-0.67585 0.19368-0.47522
   3   6  18  385.35    8.79  11-0.44769 0.56076 0.87099-0.63413 0.19841 0.52914
   3   7  19  487.67    9.53  11-0.44816 0.56130 0.87135-0.59485 0.19573 0.57248
   3   8  20  494.22    9.50  11-0.44789 0.56089 0.87114-0.55537 0.19728 0.61130
   3  10 -12  409.27    6.80  10-0.44971 0.56476 0.87249-0.48012 0.18682-0.67121
   3  11  22   31.22   11.09  10-0.44880 0.56374 0.87182-0.43760 0.19208 0.69843
   3  12 -13  190.33    8.37  11-0.44775 0.56341 0.87104-0.40070 0.19806-0.72265
   3  14 -14  358.95    9.37  11-0.44821 0.56382 0.87139-0.32249 0.19545-0.76058
   3  17 -15   -2.15    9.24  11-0.44830 0.56420 0.87146-0.20293 0.19493-0.80066
   4   2   7  264.90    9.87  10-0.44881 0.59992 0.87183-0.79305 0.19204 0.09048
   4   3  11 1308.56    8.80  10-0.44993 0.60117 0.87264-0.75359 0.18554 0.25951
   4   5  15  154.02    6.27  10-0.45022 0.60185 0.87285-0.67516 0.18384 0.42240
   4   7  18  311.69    9.02  11-0.44827 0.59961 0.87143-0.59468 0.19510 0.53234
   4   8  19   89.18    9.00  11-0.44828 0.60014 0.87143-0.55556 0.19510 0.57257
   4   9  20  112.61    9.25  11-0.44753 0.59985 0.87087-0.51555 0.19933 0.60922
   4  10 -11  772.77    9.37  11-0.44828 0.60126 0.87143-0.47957 0.19509-0.63903
   4  11  21   -0.19    7.75  10-0.45008 0.59720 0.87275-0.44048 0.18469 0.66810
   4  13 -13  334.49    6.71  10-0.44986 0.60280 0.87259-0.36245 0.18597-0.71096
   4  16 -14   26.01    9.07  11-0.44820 0.60283 0.87138-0.24232 0.19554-0.76048
   4  20 -15   24.04   10.15  10-0.44932 0.60288 0.87220-0.08677 0.18912-0.79354
   5   3   8  865.18    8.66  10-0.45008 0.63954 0.87275-0.75398 0.18469 0.13906
   5   4  12  577.75    9.25  11-0.44799 0.63677 0.87122-0.71282 0.19672 0.28805
   5   5  14  367.40    8.71  11-0.44820 0.63711 0.87138-0.67346 0.19553 0.37017
   5   6  -6   27.14    8.72  10-0.44952 0.63977 0.87234-0.63688 0.18796-0.42894
   5   7  17 1776.05   10.54  11-0.44756 0.63616 0.87089-0.59457 0.19917 0.48819
   5   8  18  284.03    8.83  11-0.44808 0.63725 0.87129-0.55518 0.19622 0.53133
   5   9  19   79.82    8.69  11-0.44784 0.63724 0.87111-0.51533 0.19757 0.57016
   5  10 -10  559.80    8.95  11-0.44761 0.63847 0.87094-0.47910 0.19884-0.60211
   5  12  21  144.38   10.95  10-0.44857 0.63938 0.87165-0.39792 0.19343 0.65574
   5  13 -12  164.08    8.56  11-0.44837 0.64004 0.87151-0.36083 0.19454-0.67842
   5  15 -13  276.18    8.66  10-0.44909 0.64005 0.87204-0.28266 0.19043-0.71467
   5  19 -14    9.33    9.99  11-0.44848 0.63997 0.87159-0.12440 0.19392-0.75868
   5  20 -14   25.00    9.94  11-0.44780 0.64094 0.87108-0.08367 0.19779-0.76348
   6   4   9  779.94   10.16  10-0.44877 0.67627 0.87180-0.71406 0.19227 0.17179
   6   5  12  183.71    8.18  10-0.44854 0.67597 0.87163-0.67427 0.19357 0.29149
   6   6  14    5.75    8.04  11-0.44827 0.67586 0.87143-0.63389 0.19512 0.37135
   6   8  -7  764.75   10.24  11-0.44745 0.67570 0.87081-0.55704 0.19978-0.48198
   6   9  -8   44.66    9.48  11-0.44700 0.67591 0.87046-0.51728 0.20230-0.52435
   6  10  -9  472.19    9.35  11-0.44822 0.67698 0.87139-0.47903 0.19539-0.55837
   6  12  20   62.06   10.58  10-0.44860 0.67763 0.87167-0.39815 0.19327 0.61595
   6  13 -11   71.18    8.20  11-0.44786 0.67743 0.87112-0.36078 0.19747-0.64102
   6  15 -12  364.39    9.26  11-0.44831 0.67767 0.87146-0.28246 0.19489-0.67912
   6  18 -13  235.60    9.99  10-0.44868 0.67783 0.87174-0.16413 0.19277-0.71703
   6  19 -13  148.29    9.49  11-0.44730 0.67746 0.87069-0.12417 0.20062-0.72542
   7   5   9   72.10    8.19  10-0.44926 0.71504 0.87216-0.67443 0.18945 0.17493
   7   6  12  855.35    9.51  11-0.44841 0.71354 0.87154-0.63459 0.19430 0.29110
   7   7  14  221.97    8.04  11-0.44782 0.71243 0.87109-0.59460 0.19769 0.36803
   7   8  15   11.62    7.83  10-0.44906 0.71635 0.87201-0.55549 0.19060 0.41819
   7  11  18   52.40    8.80  10-0.44964 0.71641 0.87243-0.43822 0.18725 0.54004
   7  12  19   62.82    9.80  10-0.44832 0.71458 0.87147-0.39751 0.19483 0.57309
   7  13 -10   76.36    8.08  11-0.44825 0.71552 0.87141-0.36012 0.19526-0.59850
   7  15 -11   20.58    8.48  11-0.44823 0.71552 0.87140-0.28068 0.19533-0.63983
   7  18 -12   93.16    9.29  11-0.44835 0.71630 0.87149-0.16357 0.19466-0.67869
   8   6   9  654.11    9.26  10-0.44846 0.75163 0.87157-0.63477 0.19407 0.17004
   8   7  -2   44.94   13.45  12-0.44460 0.74744 0.86857-0.59343 0.21544-0.29585
   8   9  15  141.13    8.20  11-0.44789 0.75072 0.87114-0.51574 0.19730 0.40883
   8  10  16  210.65    9.11  11-0.44834 0.75178 0.87148-0.47640 0.19472 0.45242
   8  11  17  107.68    9.08  11-0.44812 0.75143 0.87132-0.43689 0.19597 0.49134
   8  12  -8  247.76    9.83  11-0.44677 0.75107 0.87029-0.39856 0.20355-0.52593
   8  14  19   21.68   10.95  10-0.44839 0.75243 0.87152-0.31873 0.19447 0.57416
   8  15 -10  109.03    8.43  10-0.44903 0.75377 0.87199-0.28140 0.19079-0.59385
   8  18 -11   49.36    9.06  11-0.44860 0.75427 0.87167-0.16247 0.19324-0.63646
   8  19 -11    8.92   10.45  11-0.44621 0.75077 0.86986-0.12323 0.20664-0.64937
   9   7   1  773.24   19.10  13-0.44198 0.78309 0.86641-0.59083 0.22924-0.18874
   9   7   8 1828.63   11.89  10-0.44883 0.79027 0.87184-0.59580 0.19193 0.13208
   9   8  11  605.44    9.09  10-0.44859 0.78982 0.87167-0.55634 0.19330 0.25191
   9   9  13  312.43    8.85  11-0.44807 0.78886 0.87128-0.51578 0.19626 0.32935
   9  10  14  110.41    8.24  10-0.44932 0.79128 0.87220-0.47751 0.18908 0.37779
   9  11  15   81.47    6.62  10-0.44993 0.79202 0.87264-0.43832 0.18554 0.42135
   9  12  16    5.38    8.43  11-0.44873 0.79347 0.87177-0.39675 0.19249 0.45837
   9  13  17  152.75   10.07  10-0.44849 0.79051 0.87159-0.35841 0.19388 0.49384
   9  14  -8   84.51    9.89  11-0.44740 0.79025 0.87077-0.31992 0.20006-0.52238
   9  15  18   51.60   10.48  10-0.44936 0.79278 0.87223-0.27990 0.18888 0.53922
   9  16  -9  267.02   10.40  11-0.44721 0.78946 0.87063-0.24172 0.20110-0.56424
   9  19 -10   -3.06    9.54  11-0.44816 0.79125 0.87134-0.12323 0.19578-0.59933
   9  20 -10   39.70   10.94  11-0.44632 0.78950 0.86994-0.08307 0.20607-0.60858
  10   8   3   28.09   10.00  11-0.44710 0.82665 0.87054-0.55480 0.20174-0.08055
  10   8   6   86.66    8.15  11-0.44856 0.82822 0.87165-0.55584 0.19345 0.04855
  10   8   7   57.92    9.19  11-0.44720 0.82622 0.87062-0.55486 0.20115 0.08161
  10   9  10   11.55    7.77  11-0.44856 0.82841 0.87164-0.51587 0.19349 0.21120
  10  10  12  398.03    8.85  10-0.44839 0.82745 0.87152-0.47698 0.19447 0.29118
  10  14  16   35.38    9.74  10-0.44878 0.82971 0.87181-0.31882 0.19219 0.45541
  10  15  -7   61.69    9.95  11-0.44631 0.82672 0.86993-0.27922 0.20613-0.48818
  10  15  17   26.86    9.67  11-0.44737 0.82681 0.87075-0.27849 0.20019 0.48629
  10  16  17    9.15   10.06  11-0.44871 0.83190 0.87175-0.23841 0.19264 0.49894
  10  17  -8   29.60   10.21  11-0.44709 0.82761 0.87054-0.20156 0.20178-0.52393
  10  21  -9    8.50   10.15  11-0.44841 0.82949 0.87154-0.04478 0.19431-0.55729
  11  10   8  546.83    9.26  10-0.44899 0.86680 0.87196-0.47775 0.19102 0.13304
  11  11  11   13.73    7.92  11-0.44767 0.86381 0.87098-0.43673 0.19850 0.24558
  11  12  12  226.50    9.09  10-0.44890 0.86692 0.87190-0.39896 0.19150 0.29422
  11  13  13   29.72    8.35  10-0.44966 0.86830 0.87245-0.35873 0.18710 0.33878
  11  14  14  148.17    8.88  10-0.44929 0.86778 0.87218-0.31962 0.18927 0.37729
  11  15  15    9.70    9.93  10-0.44831 0.86605 0.87146-0.27925 0.19487 0.41192
  11  19  -7   49.70   11.28  11-0.44654 0.86507 0.87011-0.12164 0.20482-0.48697
  12  12   9  150.83    9.48  11-0.44696 0.90222 0.87044-0.39686 0.20248 0.16143
  12  14  12  149.30   10.07  11-0.44755 0.90255 0.87088-0.31815 0.19922 0.28613
  12  15  13  111.84   10.50  11-0.44741 0.90240 0.87078-0.27855 0.20000 0.32544
  12  17  14   44.83   10.41  11-0.44848 0.90523 0.87158-0.20029 0.19396 0.37234
  12  19  -5  120.11   12.51  12-0.44447 0.90024 0.86847-0.12010 0.21610-0.41870
  13  14   7  413.14    9.81  10-0.44849 0.94223 0.87160-0.31980 0.19385 0.08950
  13  14   8  227.26   10.26  11-0.44651 0.93952 0.87009-0.31807 0.20500 0.11895
  13  15   9  233.45    9.25  10-0.44882 0.94319 0.87184-0.28068 0.19196 0.17237
  13  18  -2    3.42   15.91  14-0.43881 0.93264 0.86365-0.15498 0.24532-0.32556
  13  18  12  110.60   10.79  11-0.44833 0.94258 0.87148-0.16119 0.19477 0.29000
  13  21  -3    3.56   14.88  12-0.44269 0.93749 0.86700-0.04027 0.22557-0.34619
  13  22  -3   16.16   17.05  13-0.44160 0.93645 0.86608 0.00077 0.23119-0.35160
  14  17   3   97.14   15.49  12-0.44251 0.97434 0.86685-0.19683 0.22648-0.10515
  14  17   5  173.14   11.67  11-0.44711 0.97915 0.87056-0.20040 0.20164 0.00050
  14  17   6   39.82   10.52  11-0.44663 0.97844 0.87018-0.19997 0.20432 0.03841
  14  18   8   32.39   11.06  11-0.44677 0.97917 0.87029-0.16053 0.20355 0.11964
  14  19   9   20.65   11.69  11-0.44670 0.97915 0.87023-0.12087 0.20397 0.16018
 -26   1   3   24.74   18.89  15-0.43397-0.55002 0.85846-0.82363 0.27093-0.14899
 -26   3  -4   80.97   12.68  12-0.44415-0.53904 0.86750-0.75313 0.22047-0.38128
 -25   4  -7   -0.31   10.60  12-0.44607-0.49817 0.86904-0.71104 0.21015-0.49921
 -24   0  10   37.45   12.97  12-0.44306-0.46437 0.86660-0.86862 0.22618 0.17882
 -24   1  -2    3.95   11.76  13-0.44203-0.46573 0.86572-0.83001 0.23154-0.31176
 -24   5  -9   21.56   10.54  12-0.44554-0.46268 0.86862-0.67575 0.21301-0.57626
 -23   3  -7   -0.95   10.55  13-0.44268-0.42329 0.86628-0.75122 0.22817-0.50930
 -22   0  -2  108.81   11.38  12-0.44309-0.39001 0.86662-0.86991 0.22605-0.30650
 -22   0  13  100.70   11.69  12-0.44424-0.38878 0.86757-0.86973 0.21999 0.30628
 -22   3  -8   77.52    9.25  11-0.44596-0.38596 0.86896-0.75435 0.21074-0.53367
 -21  -1   0   11.19   12.41  13-0.44158-0.35270 0.86534-0.90755 0.23386-0.23348
 -21  -1  11   25.89   10.93  12-0.44466-0.35039 0.86791-0.90928 0.21774 0.22769
 -21   0  14    4.60   11.14  11-0.44541-0.34824 0.86852-0.86952 0.21372 0.35173
 -21   2  -7    6.16    9.77  12-0.44420-0.35039 0.86754-0.79205 0.22018-0.50265
 -21   4 -10   24.30    8.91  11-0.44691-0.34613 0.86970-0.71563 0.20556-0.60886
 -21   5 -11   18.95    9.72  11-0.44665-0.34653 0.86950-0.67674 0.20697-0.65153
 -21   6 -12  144.47    9.79  11-0.44675-0.34695 0.86957-0.63692 0.20642-0.69022
 -20  -1  12  115.33    9.26  11-0.44590-0.31119 0.86890-0.91030 0.21109 0.27488
 -20   0  -4   58.67    9.66  12-0.44357-0.31333 0.86702-0.86964 0.22353-0.38493
 -20   1  -6  271.06   10.14  12-0.44411-0.31355 0.86746-0.83105 0.22070-0.46228
 -20   3  -9  350.50    9.16  12-0.44475-0.31328 0.86798-0.75356 0.21729-0.58021
 -20   7 -13   -6.75    9.90  12-0.44532-0.30861 0.86845-0.59124 0.21419-0.74661
 -20   8 -14    5.45    9.88  11-0.44688-0.30962 0.86968-0.55849 0.20569-0.77093
 -19  -1  13   28.47    9.38  11-0.44573-0.27287 0.86877-0.90962 0.21202 0.31439
 -19   1  17    2.59    9.85  11-0.44696-0.27334 0.86974-0.83191 0.20527 0.48319
 -19   9 -15   31.78   10.15  11-0.44660-0.27091 0.86946-0.51887 0.20726-0.81197
 -18  -1  -3  100.31    9.59  12-0.44348-0.23788 0.86694-0.90926 0.22401-0.34486
 -18  -1  14   70.43   10.27  12-0.44389-0.23717 0.86729-0.90828 0.22183 0.34522
 -18   0  16  176.85   10.19  12-0.44561-0.23500 0.86868-0.86931 0.21265 0.43500
 -18   3 -10  405.30    9.45  12-0.44577-0.23578 0.86881-0.75408 0.21176-0.61498
 -18   4 -11   20.69    8.39  12-0.44481-0.23516 0.86804-0.71318 0.21693-0.66216
 -18   5 -12   68.10    8.54  12-0.44492-0.23606 0.86813-0.67521 0.21633-0.70048
 -18   6 -13   90.85    9.71  12-0.44576-0.23474 0.86879-0.63592 0.21184-0.73669
 -18   7 -14   68.40    7.42  11-0.44742-0.23209 0.87009-0.59843 0.20272-0.76820
 -18   9 -15   -6.41    9.66  12-0.44517-0.23185 0.86832-0.51186 0.21504-0.82830
 -17   0  -6    1.96    8.12  12-0.44587-0.19684 0.86889-0.87084 0.21122-0.45292
 -17   1  18   69.16   10.59  11-0.44618-0.19601 0.86913-0.83137 0.20956 0.51972
 -17   2  -9   97.55    8.62  12-0.44520-0.19875 0.86835-0.79280 0.21483-0.57819
 -17   7 -14   89.74    9.63  12-0.44540-0.19670 0.86851-0.59670 0.21378-0.77930
 -17   8 -15   82.42    7.45  11-0.44757-0.19378 0.87021-0.55851 0.20187-0.80774
 -17  10 -16   43.18   11.14  12-0.44587-0.19588 0.86889-0.47872 0.21122-0.85682
 -16  -3   4  462.56   18.55  14-0.43715-0.16872 0.86142-0.98187 0.25584-0.09364
 -16  -3   6  309.88   11.81  12-0.44353-0.16258 0.86699-0.98698 0.22373 0.01921
 -16  -2  12  160.88    8.52  12-0.44571-0.16003 0.86875-0.94850 0.21213 0.27359
 -16   1  -8  287.27    8.70  11-0.44599-0.15960 0.86898-0.83220 0.21058-0.53306
 -16   2  20   42.19   10.26  12-0.44495-0.15895 0.86815-0.78959 0.21619 0.59213
 -16   8 -15   -3.17    9.79  12-0.44595-0.15335 0.86895-0.55152 0.21079-0.82107
 -15  -3   8  142.94   10.01  12-0.44428-0.12372 0.86760-0.98706 0.21978 0.10407
 -15  -1  15   17.25    8.92  12-0.44599-0.12273 0.86898-0.90943 0.21060 0.39676
 -15   0  17    7.41    9.18  11-0.44598-0.12259 0.86897-0.86969 0.21063 0.47744
 -15   2  20   95.36   10.96  11-0.44592-0.12017 0.86893-0.79142 0.21094 0.59858
 -15   3 -11  286.62    6.64  11-0.44757-0.11972 0.87021-0.75556 0.20187-0.64567
 -15   4 -12   31.00    7.94  11-0.44687-0.11916 0.86967-0.71539 0.20576-0.69000
 -15   5 -13  185.99    6.69  11-0.44734-0.11967 0.87003-0.67650 0.20314-0.72805
 -15   8 -15  203.07    9.09  12-0.44477-0.12297 0.86800-0.55690 0.21716-0.82253
 -15   9 -16   51.92    7.40  11-0.44772-0.11873 0.87032-0.51960 0.20101-0.84713
 -15  11 -17   18.62    9.96  11-0.44726-0.11961 0.86997-0.44030 0.20357-0.89068
 -14  -2  13  126.74    9.72  12-0.44462-0.08526 0.86788-0.94725 0.21795 0.30820
 -14   0  17  159.15    9.08  11-0.44699-0.08278 0.86976-0.87136 0.20508 0.48264
 -14   1  19   41.88    9.15  12-0.44504-0.08338 0.86822-0.82880 0.21571 0.55233
 -14   2  20   20.85    9.68  11-0.44688-0.08223 0.86968-0.79193 0.20569 0.60410
 -14   3 -11  287.83    8.91  11-0.44613-0.08352 0.86909-0.75390 0.20979-0.65317
 -14   4 -12  212.67    8.97  12-0.44580-0.08365 0.86883-0.71462 0.21159-0.69591
 -14   5 -13  175.83    8.71  11-0.44611-0.08309 0.86907-0.67534 0.20994-0.73413
 -14   6 -14    9.34    6.48  11-0.44749-0.08187 0.87015-0.63686 0.20229-0.76785
 -14   9 -16   24.76    9.00  11-0.44672-0.08171 0.86955-0.51845 0.20657-0.85216
 -14  11 -17   50.87   10.63  11-0.44620-0.08205 0.86914-0.43927 0.20944-0.89540
 -13  -3   9   66.48    8.29  12-0.44552-0.04617 0.86860-0.98741 0.21315 0.15055
 -13  -2  13  571.59    9.50  12-0.44570-0.04698 0.86875-0.94797 0.21217 0.31372
 -13  -1  -5  366.24    9.36  12-0.44585-0.04613 0.86887-0.91051 0.21136-0.41273
 -13   0  -7    1.32    8.34  11-0.44673-0.04556 0.86956-0.87186 0.20654-0.48933
 -13   1  19    5.24    9.67  12-0.44548-0.04709 0.86857-0.82937 0.21334 0.55553
 -13   2 -10  804.87    9.50  11-0.44694-0.04473 0.86972-0.79346 0.20539-0.60848
 -13   2  20   16.23    7.92  11-0.44757-0.04357 0.87021-0.79205 0.20187 0.60774
 -13   3 -11  127.39    8.21  12-0.44555-0.04591 0.86863-0.75334 0.21298-0.65743
 -13   4 -12  178.32    7.88  12-0.44517-0.04683 0.86832-0.71422 0.21503-0.69969
 -13   5 -13  552.40    8.94  12-0.44560-0.04645 0.86867-0.67537 0.21272-0.73726
 -13   6 -14  195.51    8.35  11-0.44675-0.04433 0.86957-0.63673 0.20642-0.77097
 -13   9 -16  146.45    9.35  11-0.44617-0.04520 0.86912-0.51812 0.20960-0.85505
 -13  11 -17   95.94   10.06  12-0.44578-0.04535 0.86881-0.43925 0.21174-0.89800
 -13  13 -18   20.99    9.84  11-0.44645-0.04276 0.86934-0.36117 0.20809-0.93215
 -12  -3   9  134.29    8.45  11-0.44588-0.00824 0.86889-0.98796 0.21117 0.15296
 -12  -2  13  113.31    8.35  11-0.44592-0.00784 0.86892-0.94870 0.21096 0.31452
 -12  -1  -5  669.36   10.10  12-0.44534-0.00887 0.86846-0.91022 0.21411-0.41563
 -12   0  -7  365.70    8.78  11-0.44603-0.00796 0.86901-0.87124 0.21036-0.49233
 -12   1  19   -9.54    9.37  12-0.44576-0.01570 0.86879-0.83106 0.21185 0.55461
 -12   2 -10  310.58    8.73  11-0.44659-0.00712 0.86945-0.79305 0.20732-0.61049
 -12   3 -11  113.44    8.32  12-0.44513-0.00892 0.86829-0.75344 0.21526-0.65877
 -12   4 -12  476.97    8.60  12-0.44471-0.00998 0.86795-0.71363 0.21751-0.70169
 -12   5 -13  111.22    8.30  12-0.44536-0.00863 0.86847-0.67533 0.21402-0.73864
 -12   6 -14  294.35    8.73  11-0.44649-0.00713 0.86937-0.63616 0.20787-0.77263
 -12   9 -16    3.71    8.87  12-0.44579-0.00647 0.86882-0.51701 0.21164-0.85684
 -12  11 -17   59.90    9.53  12-0.44559-0.00699 0.86866-0.43858 0.21275-0.89942
 -12  13 -18   65.80    9.65  11-0.44680-0.00628 0.86962-0.36157 0.20612-0.93295
 -11  -3   9  826.37   10.42  12-0.44575 0.02902 0.86879-0.98754 0.21186 0.15232
 -11  -2  13  216.21    8.61  11-0.44588 0.02939 0.86889-0.94809 0.21118 0.31469
 -11  -1  -5   95.62    8.34  12-0.44548 0.03055 0.86857-0.91026 0.21335-0.41429
 -11   0  -7    1.12    8.23  12-0.44587 0.03032 0.86889-0.87011 0.21122-0.49327
 -11   1  19   -1.32    9.19  12-0.44572 0.02223 0.86876-0.83081 0.21206 0.55455
 -11   2 -10  685.66    8.92  11-0.44677 0.03094 0.86959-0.79331 0.20633-0.60929
 -11   3 -11  150.11    8.38  12-0.44530 0.02966 0.86843-0.75319 0.21431-0.65835
 -11   4 -12  488.33    8.54  12-0.44479 0.02817 0.86802-0.71352 0.21703-0.70123
 -11   5 -13   62.73    8.48  12-0.44536 0.03035 0.86847-0.67464 0.21402-0.73862
 -11   6 -14   85.18    7.80  11-0.44670 0.03183 0.86954-0.63668 0.20669-0.77151
 -11   9 -16   36.22    8.80  12-0.44603 0.03113 0.86901-0.51721 0.21038-0.85615
 -11  11 -17   62.09    9.44  12-0.44572 0.03064 0.86877-0.43899 0.21203-0.89870
 -11  13 -18   13.84    9.37  12-0.44626 0.03295 0.86919-0.36104 0.20913-0.93258
 -10  -3   9  787.08    9.98  12-0.44493 0.06585 0.86813-0.98630 0.21630 0.14809
 -10  -2  13  174.92    8.37  12-0.44532 0.06645 0.86845-0.94708 0.21421 0.31173
 -10  -1  -5 1315.00   11.69  11-0.44632 0.06791 0.86924-0.91022 0.20877-0.40966
 -10   0  -7 1147.43    9.17  11-0.44742 0.06963 0.87009-0.87244 0.20272-0.48490
 -10   0  17  279.71    7.01  11-0.44742 0.06829 0.87009-0.87095 0.20272 0.48466
 -10   1  19   36.73    8.40  12-0.44536 0.06716 0.86848-0.82885 0.21398 0.55361
 -10   2 -10  202.89    6.11  11-0.44765 0.06992 0.87027-0.79441 0.20144-0.60449
 -10   2  20  196.02    7.33  11-0.44726 0.06842 0.86997-0.79181 0.20357 0.60522
 -10   3 -11  148.84    8.32  12-0.44585 0.06791 0.86887-0.75351 0.21134-0.65502
 -10   4 -12   63.67    8.15  12-0.44537 0.06799 0.86849-0.71397 0.21392-0.69794
 -10   5 -13  195.19    8.66  12-0.44586 0.06822 0.86887-0.67493 0.21130-0.73575
 -10   6 -14   29.84    6.32  11-0.44726 0.06998 0.86997-0.63683 0.20357-0.76880
 -10   9 -16   87.91    8.29  11-0.44651 0.06942 0.86939-0.51823 0.20775-0.85324
 -10  11 -17   87.14    9.32  12-0.44594 0.06904 0.86894-0.43950 0.21088-0.89630
 -10  13 -18   27.05    7.36  11-0.44726 0.07026 0.86997-0.36154 0.20357-0.93030
  -9  -3   8  367.37    9.26  11-0.44588 0.10517 0.86889-0.98753 0.21118 0.11250
  -9  -2  -2   92.49   11.10  12-0.44341 0.10419 0.86689-0.94715 0.22436-0.30409
  -9  -1  15    8.98    7.97  12-0.44609 0.10365 0.86905-0.90979 0.21006 0.39952
  -9   0  17   -2.57    8.83  12-0.44618 0.09866 0.86913-0.87149 0.20952 0.47824
  -9   2  20   12.57    9.11  11-0.44620 0.10478 0.86914-0.79092 0.20944 0.60099
  -9   3 -11 1013.02    9.51  11-0.44697 0.10699 0.86975-0.75436 0.20518-0.64869
  -9   3  21   64.08    7.14  11-0.44757 0.10760 0.87021-0.75290 0.20187 0.64749
  -9   4 -12  289.06    8.73  11-0.44630 0.10626 0.86922-0.71422 0.20888-0.69279
  -9   5 -13  552.38    8.85  11-0.44670 0.10677 0.86954-0.67526 0.20667-0.73076
  -9   9 -16   14.76    6.09  11-0.44742 0.10781 0.87009-0.51817 0.20272-0.84924
  -9  11 -17  264.88    8.90  11-0.44681 0.10689 0.86962-0.44030 0.20606-0.89215
  -9  14 -18   81.28    9.29  12-0.44514 0.10552 0.86830-0.32073 0.21521-0.94181
  -8  -3   6  670.82   10.39  11-0.44662 0.14414 0.86947-0.98839 0.20713 0.03576
  -8  -3   7  388.82    9.28  12-0.44545 0.14271 0.86855-0.98671 0.21351 0.06991
  -8  -2  12  426.69    8.76  11-0.44667 0.14357 0.86951-0.94884 0.20688 0.27795
  -8  -1  15   12.24    8.37  12-0.44525 0.14178 0.86839-0.90767 0.21461 0.39229
  -8   0  17  245.53    8.86  12-0.44530 0.14225 0.86843-0.86804 0.21434 0.47324
  -8   1  -8 2181.89   12.35  12-0.44508 0.14220 0.86825-0.83130 0.21551-0.53819
  -8   2  20   55.97    9.29  12-0.44554 0.14245 0.86862-0.78887 0.21303 0.59575
  -8   3  21  127.65    9.14  11-0.44655 0.14329 0.86942-0.75137 0.20752 0.64218
  -8   4  22  386.15   10.05  11-0.44694 0.14371 0.86972-0.71287 0.20539 0.68458
  -8   5  23   13.97    9.97  11-0.44643 0.14285 0.86932-0.67237 0.20820 0.72459
  -8   8 -15   35.99    8.58  12-0.44550 0.14360 0.86859-0.55690 0.21322-0.81886
  -8  14 -18   13.80    9.67  11-0.44606 0.14518 0.86903-0.32030 0.21019-0.93665
  -7  -1  -4  420.30   11.32  12-0.44530 0.18067 0.86843-0.90949 0.21429-0.37477
  -7   1  18    8.65    6.36  11-0.44719 0.18148 0.86991-0.83031 0.20399 0.52443
  -7   3  21   24.91    8.85  12-0.44542 0.18029 0.86853-0.74976 0.21366 0.63456
  -7   4  22  137.48   10.12  11-0.44581 0.18092 0.86884-0.71084 0.21155 0.67771
  -7   5  23   54.11   10.76  12-0.44562 0.18073 0.86868-0.67072 0.21261 0.71751
  -7   8 -15   -5.01    5.80  11-0.44711 0.18904 0.86986-0.55129 0.20442-0.81333
  -7  10 -16  261.08    8.70  12-0.44539 0.18058 0.86850-0.47861 0.21383-0.85993
  -7  12 -17    0.28    8.91  12-0.44572 0.18912 0.86876-0.39272 0.21206-0.90059
  -7  14 -18  210.28    7.59  11-0.44757 0.18403 0.87021-0.32322 0.20187-0.92878
  -7  15 -18  139.67    9.47  12-0.44500 0.18043 0.86819-0.28097 0.21592-0.94308
  -6  -2  11 1649.08   11.24  12-0.44553 0.21802 0.86861-0.94689 0.21310 0.23179
  -6  -1  14   14.10    7.98  11-0.44583 0.21803 0.86885-0.90782 0.21146 0.35472
  -6   0  16  742.68    9.01  11-0.44653 0.21880 0.86941-0.86984 0.20760 0.43912
  -6   1  18  299.66    8.49  12-0.44527 0.21763 0.86841-0.82862 0.21446 0.51305
  -6   2  -9  504.70    9.55  11-0.44669 0.22025 0.86953-0.79282 0.20673-0.56886
  -6   2  19  158.69    6.46  11-0.44772 0.21968 0.87032-0.79184 0.20101 0.56733
  -6   7 -14  195.48    8.32  11-0.44643 0.22034 0.86933-0.59659 0.20816-0.77240
  -6  10 -16   64.22    6.15  11-0.44719 0.22150 0.86991-0.47923 0.20399-0.84991
  -6  12 -17   88.51    6.47  11-0.44734 0.22223 0.87003-0.40096 0.20314-0.88931
  -6  15 -18   59.12    9.30  11-0.44652 0.22110 0.86940-0.28194 0.20768-0.93408
  -5  -2  10 1822.60   12.15  12-0.44522 0.25569 0.86836-0.94676 0.21477 0.18983
  -5  -1  13  472.45    6.83  11-0.44742 0.25775 0.87009-0.90927 0.20272 0.32274
  -5   1  -7 1264.03   11.73  12-0.44585 0.25675 0.86887-0.83137 0.21133-0.49316
  -5   2  19  141.56    8.70  12-0.44566 0.25621 0.86872-0.78871 0.21238 0.55611
  -5   3 -10  266.36    6.73  11-0.44780 0.25955 0.87038-0.75455 0.20059-0.60325
  -5   3  20   10.94    6.27  11-0.44711 0.25730 0.86986-0.75129 0.20442 0.60523
  -5   4 -11  828.48    9.58  11-0.44636 0.25768 0.86927-0.71389 0.20855-0.65170
  -5   5 -12  218.25    8.70  11-0.44637 0.25817 0.86928-0.67465 0.20852-0.69212
  -5   6 -13  382.45    6.99  11-0.44742 0.25931 0.87009-0.63661 0.20272-0.72690
  -5   6  23   76.66    7.80  11-0.44726 0.25790 0.86997-0.63423 0.20357 0.72683
  -5   9 -15  158.32    8.56  12-0.44584 0.25747 0.86886-0.51747 0.21139-0.81666
  -5  11 -16  166.65    8.00  12-0.44499 0.25640 0.86818-0.43828 0.21600-0.86207
  -5  13 -17   65.40    8.90  12-0.44591 0.25809 0.86891-0.35983 0.21103-0.89714
  -5  16 -18   30.67   10.22  11-0.44622 0.25896 0.86916-0.24135 0.20932-0.93569
  -4  -2   8  913.33   11.47  11-0.44597 0.29477 0.86897-0.94776 0.21067 0.11257
  -4  -1  -2  568.88   16.37  12-0.44494 0.29433 0.86814-0.90846 0.21627-0.29576
  -4   0  15  113.19    8.02  11-0.44588 0.29516 0.86890-0.86834 0.21115 0.39480
  -4   1  17  157.42    8.50  12-0.44546 0.29400 0.86856-0.82831 0.21344 0.47364
  -4   2  -8  924.78   10.50  12-0.44562 0.29444 0.86868-0.79203 0.21262-0.53504
  -4   4  21   19.72    9.14  11-0.44577 0.29385 0.86881-0.71011 0.21176 0.63732
  -4   5  22  161.06    9.90  11-0.44580 0.29435 0.86883-0.67134 0.21162 0.67786
  -4   6  23    9.47    9.52  11-0.44553 0.29397 0.86861-0.63149 0.21308 0.71534
  -4   8 -14   26.05    8.43  12-0.44564 0.29507 0.86870-0.55610 0.21249-0.77754
  -4  11 -16   17.34    6.36  11-0.44757 0.29757 0.87021-0.43886 0.20187-0.84840
  -4  14 -17   81.97    9.22  12-0.44542 0.29534 0.86852-0.32021 0.21368-0.90062
  -4  17 -18   20.76    9.79  11-0.44643 0.29719 0.86932-0.20267 0.20820-0.93348
  -3  -1  -1  982.97   22.83  12-0.44628 0.33332 0.86921-0.90910 0.20899-0.24790
  -3  -1  11  400.43    7.02  11-0.44757 0.33370 0.87021-0.90940 0.20187 0.24253
  -3   0  14   -3.78    6.26  11-0.44696 0.32834 0.86974-0.87056 0.20527 0.36226
  -3   1  -6  360.32    8.70  11-0.44795 0.33498 0.87050-0.83295 0.19974-0.44019
  -3   1  16  158.37    6.33  11-0.44719 0.33351 0.86991-0.83041 0.20399 0.44262
  -3   2  18   12.56    8.40  12-0.44532 0.33139 0.86845-0.78895 0.21419 0.51419
  -3   3  -9  868.52    8.17  11-0.44734 0.33444 0.87003-0.75401 0.20314-0.56555
  -3   3  19   74.81    6.48  11-0.44749 0.33369 0.87015-0.75191 0.20229 0.56560
  -3   4 -10  149.03    9.03  12-0.44528 0.33207 0.86841-0.71353 0.21444-0.61727
  -3   6 -12  938.76    9.70  12-0.44545 0.33218 0.86855-0.63480 0.21352-0.69808
  -3   7 -13  422.18    8.72  11-0.44676 0.33430 0.86958-0.59629 0.20636-0.73032
  -3   7  23   91.07    7.80  11-0.44772 0.33428 0.87032-0.59419 0.20101 0.72939
  -3  10 -15  372.85    8.46  11-0.44651 0.33418 0.86939-0.47827 0.20774-0.81266
  -3  12 -16  137.85    8.40  11-0.44635 0.33462 0.86926-0.39895 0.20863-0.85424
  -3  15 -17   -2.41    9.24  12-0.44540 0.33437 0.86851-0.27979 0.21376-0.90042
  -2  -1  10  169.94    9.40  12-0.44565 0.36935 0.86871-0.90781 0.21242 0.19142
  -2   0  13   34.49    5.96  11-0.44711 0.37131 0.86986-0.86965 0.20442 0.32038
  -2   2  17   58.73    5.96  11-0.44711 0.37086 0.86986-0.79118 0.20442 0.48271
  -2   4  20  264.00    9.22  12-0.44569 0.36957 0.86874-0.71021 0.21222 0.59625
  -2   5  21  228.00    9.51  11-0.44603 0.36978 0.86901-0.67200 0.21038 0.63892
  -2   6  22   46.69    9.68  11-0.44587 0.37017 0.86888-0.63164 0.21123 0.67868
  -2   7  23   18.52    9.55  12-0.44493 0.36928 0.86813-0.59136 0.21631 0.71458
  -2   9 -14  207.30    8.05  11-0.44672 0.37244 0.86955-0.51755 0.20657-0.77079
  -2  11 -15   90.68    8.30  12-0.44546 0.37136 0.86856-0.43832 0.21344-0.81898
  -2  13 -16   11.09    8.52  11-0.44598 0.37205 0.86897-0.35869 0.21061-0.85657
  -2  16 -17   11.58    9.47  11-0.44610 0.37237 0.86907-0.24071 0.20998-0.89677
  -1  -1   3 1203.91   20.36  12-0.44498 0.40775 0.86817-0.90710 0.21602-0.09465
  -1  -1   7 2110.42   13.72  11-0.44626 0.40862 0.86919-0.90828 0.20909 0.07381
  -1   0  12    0.67    8.39  11-0.44618 0.40788 0.86913-0.86847 0.20952 0.27594
  -1   2  -6 4159.65   17.67  12-0.44538 0.40753 0.86850-0.79112 0.21387-0.45565
  -1   3  18  234.79    8.56  11-0.44590 0.40782 0.86891-0.75070 0.21107 0.51624
  -1   4  -9 1041.04    8.51  11-0.44703 0.40993 0.86980-0.71423 0.20484-0.56729
  -1   4  19  484.11    7.09  11-0.44765 0.40898 0.87027-0.71258 0.20144 0.56685
  -1   5 -10  574.14    9.63  12-0.44561 0.40813 0.86867-0.67386 0.21266-0.61605
  -1   6 -11 1038.26   10.10  12-0.44562 0.40819 0.86868-0.63439 0.21262-0.65669
  -1   7 -12  147.06    8.16  11-0.44673 0.40974 0.86956-0.59634 0.20652-0.69058
  -1   7  22   98.42    7.27  11-0.44787 0.40955 0.87044-0.59444 0.20016 0.68953
  -1   8  23  115.37    9.95  11-0.44663 0.40849 0.86948-0.55381 0.20709 0.72325
  -1  10 -14   51.22    8.40  12-0.44556 0.40983 0.86864-0.47715 0.21291-0.77782
  -1  12 -15  134.53    8.01  12-0.44502 0.40839 0.86821-0.39763 0.21580-0.82209
  -1  14 -16    3.10    9.07  12-0.44615 0.41654 0.86910-0.31395 0.20973-0.85363
  -1  17 -17    8.12    7.56  11-0.44757 0.41189 0.87021-0.20231 0.20187-0.88892
  -1  18 -17  241.20   10.89  12-0.44581 0.40968 0.86884-0.16297 0.21154-0.89798
   0   0  10 4104.87   13.18  11-0.44742 0.44725 0.87009-0.86962 0.20272 0.20130
   0   1  -3    4.14   16.78  12-0.44540 0.44568 0.86851-0.82934 0.21376-0.33539
   0   3  17   -0.78    6.31  11-0.44703 0.44190 0.86980-0.75201 0.20484 0.48526
   0   6  21   14.70    8.70  11-0.44558 0.44463 0.86865-0.63076 0.21279 0.63308
   0   9 -13   -1.14    5.90  11-0.44711 0.45447 0.86986-0.51113 0.20442-0.72982
   0   9  23    4.27    7.77  11-0.44757 0.44140 0.87021-0.51690 0.20187 0.73121
   0  11 -14  168.92    7.89  12-0.44501 0.44565 0.86819-0.43737 0.21588-0.78147
   0  13 -15   -6.28    8.90  12-0.44560 0.45432 0.86867-0.35263 0.21270-0.81848
   0  15 -16   95.26    6.69  11-0.44757 0.44985 0.87021-0.28223 0.20187-0.84776
   0  16 -16   48.85    8.92  12-0.44512 0.44761 0.86829-0.23970 0.21527-0.86193
   1   0   3    2.13   17.35  11-0.44660 0.48371 0.86946-0.86946 0.20723-0.08814
   1   0   7   -1.19    7.61  11-0.44719 0.48333 0.86991-0.86992 0.20399 0.08179
   1   0   8    7.27    9.37  11-0.44557 0.48258 0.86865-0.86732 0.21285 0.10880
   1   1  12  175.69    8.80  11-0.44597 0.48346 0.86897-0.82924 0.21067 0.27404
   1   2  -4 2092.40   18.38  12-0.44554 0.48322 0.86862-0.79095 0.21304-0.37397
   1   3  -6 1665.01   11.51  11-0.44780 0.48597 0.87038-0.75375 0.20059-0.44152
   1   3  16   71.83    6.16  11-0.44734 0.48494 0.87003-0.75143 0.20314 0.44314
   1   5  19  114.77    8.80  11-0.44601 0.48398 0.86899-0.67176 0.21048 0.55738
   1   6  20  127.22    8.51  11-0.44656 0.48406 0.86942-0.63288 0.20748 0.60115
   1   7  21  151.41    9.45  11-0.44626 0.48431 0.86919-0.59326 0.20910 0.64016
   1   8  22   75.80    9.90  12-0.44560 0.48328 0.86867-0.55211 0.21269 0.67680
   1  10 -13  328.99    8.63  11-0.44632 0.48541 0.86924-0.47739 0.20877-0.73272
   1  12 -14  282.35    9.00  12-0.44538 0.48424 0.86849-0.39822 0.21387-0.77941
   1  14 -15   10.75    8.83  11-0.44650 0.48615 0.86938-0.31919 0.20782-0.81389
   1  17 -16   84.92    7.40  11-0.44726 0.48761 0.86997-0.20278 0.20357-0.84961
   1  18 -16   27.33   10.48  12-0.44560 0.48627 0.86867-0.16119 0.21271-0.85924
   2   1  10  172.94    8.93  11-0.44597 0.52185 0.86896-0.82890 0.21070 0.19277
   2   2  13   37.78    8.22  11-0.44619 0.52180 0.86913-0.79002 0.20951 0.31601
   2   3  15  182.84    8.49  11-0.44679 0.52185 0.86961-0.75091 0.20618 0.39992
   2   4  17  498.14    8.61  12-0.44503 0.52074 0.86821-0.70897 0.21578 0.47147
   2   5  18   87.14    8.36  11-0.44671 0.52271 0.86955-0.67196 0.20662 0.52091
   2   6  -9  690.19    8.02  11-0.44696 0.52351 0.86974-0.63499 0.20527-0.56782
   2   6  19   82.60    6.33  11-0.44765 0.52355 0.87027-0.63303 0.20144 0.56685
   2   7 -10  409.54    8.97  11-0.44671 0.52342 0.86954-0.59553 0.20665-0.60931
   2   7  20    9.67    6.45  11-0.44772 0.52346 0.87032-0.59326 0.20101 0.60849
   2   8  21  134.06    6.95  11-0.44711 0.52280 0.86986-0.55432 0.20442 0.64479
   2   9  22   45.79   10.07  11-0.44592 0.52206 0.86892-0.51338 0.21098 0.67851
   2  11 -13  427.57    8.50  11-0.44678 0.52382 0.86960-0.43846 0.20627-0.73057
   2  13 -14  438.07    9.26  11-0.44639 0.52341 0.86929-0.35920 0.20839-0.77301
   2  16 -15   15.15    8.87  12-0.44578 0.52386 0.86881-0.23988 0.21174-0.81774
   3   2  11 1368.50    8.97  11-0.44711 0.56027 0.86986-0.79048 0.20442 0.23994
   3   3  14   98.21    8.25  12-0.44526 0.55836 0.86840-0.74895 0.21452 0.35131
   3   5  17  307.06    8.53  11-0.44666 0.55994 0.86950-0.67214 0.20693 0.48034
   3   6  -8  534.52    9.97  12-0.44595 0.56000 0.86894-0.63374 0.21082-0.53315
   3   7  -9  199.53    9.09  12-0.44546 0.55978 0.86856-0.59471 0.21345-0.57677
   3   8 -10 1386.48   10.45  12-0.44593 0.56026 0.86893-0.55533 0.21090-0.61447
   3   9 -11  152.22    5.91  11-0.44772 0.56286 0.87032-0.51764 0.20101-0.64438
   3   9  21  105.30    7.60  11-0.44726 0.56143 0.86997-0.51477 0.20357 0.64514
   3  10  22   56.93   10.84  12-0.44577 0.55972 0.86880-0.47310 0.21180 0.67781
   3  15 -14   64.02    8.79  12-0.44534 0.56128 0.86846-0.27890 0.21411-0.77958
   3  18 -15   23.33    9.25  11-0.44703 0.56367 0.86980-0.16207 0.20484-0.81038
   3  19 -15    4.76   10.15  12-0.44556 0.56207 0.86864-0.12164 0.21291-0.81855
   3  20 -15  134.18   10.63  12-0.44451 0.55931 0.86779-0.08182 0.21853-0.82538
   4   2   2 1219.01   17.32  12-0.44594 0.59719 0.86894-0.78988 0.21083-0.13034
   4   2   8  892.97    8.86  11-0.44711 0.59797 0.86986-0.79059 0.20442 0.11823
   4   3  12  796.14    9.73  11-0.44611 0.59768 0.86907-0.75048 0.20994 0.27520
   4   4  14 1539.90    9.02  11-0.44742 0.59811 0.87009-0.71162 0.20272 0.36320
   4   5  16  267.18    8.75  12-0.44587 0.59705 0.86889-0.67063 0.21122 0.43566
   4   6  -7  313.42    9.52  11-0.44663 0.59866 0.86948-0.63420 0.20709-0.48849
   4   6  17   15.38    5.81  11-0.44772 0.59915 0.87032-0.63248 0.20101 0.48684
   4   7  -8  267.60    9.11  12-0.44501 0.59702 0.86819-0.59382 0.21590-0.53890
   4   8  -9  276.85    8.78  12-0.44500 0.59709 0.86819-0.55453 0.21592-0.57935
   4   9 -10  457.41    8.76  11-0.44614 0.59864 0.86910-0.51560 0.20974-0.61287
   4  10  21   18.60    9.32  11-0.44633 0.59883 0.86925-0.47348 0.20870 0.64319
   4  11  22   91.26   10.29  12-0.44491 0.59768 0.86811-0.43293 0.21643 0.67231
   4  12 -12  149.87    8.38  12-0.44588 0.59871 0.86889-0.39772 0.21116-0.69541
   4  14 -13  117.79    8.69  12-0.44601 0.59853 0.86899-0.31916 0.21047-0.73506
   4  17 -14  102.07    9.27  12-0.44600 0.59960 0.86898-0.20076 0.21054-0.77511
   5   3   9  600.56    7.87  11-0.44772 0.63648 0.87032-0.75159 0.20101 0.16249
   5   6  16  108.63    8.44  11-0.44634 0.63637 0.86925-0.63196 0.20869 0.43782
   5   7  -7   89.31    8.35  11-0.44615 0.63645 0.86910-0.59442 0.20972-0.49072
   5   8  -8  384.28    9.27  12-0.44543 0.63557 0.86853-0.55428 0.21363-0.53690
   5   9  -9  771.73    9.49  12-0.44597 0.63608 0.86897-0.51549 0.21067-0.57385
   5  10  20   26.10    8.94  11-0.44675 0.63761 0.86957-0.47407 0.20643 0.60426
   5  11  21  141.73   10.62  12-0.44560 0.63560 0.86867-0.43347 0.21268 0.63616
   5  12 -11  188.67    8.35  12-0.44445 0.63464 0.86774-0.39666 0.21885-0.66331
   5  16 -13  345.20    9.62  11-0.44640 0.63707 0.86930-0.24028 0.20835-0.73274
   6   4  10  170.76    8.88  11-0.44607 0.67348 0.86904-0.71077 0.21016 0.19369
   6   5  13  756.69    9.07  12-0.44509 0.67218 0.86826-0.66946 0.21547 0.30998
   6   7  16   51.63    8.32  11-0.44625 0.67400 0.86918-0.59244 0.20917 0.43683
   6   8  17  294.65    7.05  11-0.44726 0.67457 0.86997-0.55417 0.20357 0.48374
   6   9  18  204.57    6.72  11-0.44749 0.67472 0.87015-0.51468 0.20229 0.52546
   6  10  19   17.63    8.86  11-0.44680 0.67439 0.86962-0.47397 0.20612 0.56296
   6  11  20   44.09   10.04  12-0.44560 0.67355 0.86867-0.43323 0.21272 0.59598
   6  16 -12   41.10    8.79  12-0.44549 0.67579 0.86858-0.23957 0.21328-0.69738
   6  20 -13  116.83   10.52  12-0.44615 0.67528 0.86911-0.08259 0.20969-0.73344
   6  21 -13    3.99   10.74  12-0.44571 0.67564 0.86876-0.04259 0.21209-0.73657
   7   5  10 1820.02   11.19  11-0.44646 0.71167 0.86935-0.67172 0.20801 0.19653
   7   6  13  113.45    7.97  12-0.44493 0.70986 0.86813-0.63013 0.21633 0.30849
   7   7  -4 1320.52   14.66  12-0.44479 0.71019 0.86802-0.59262 0.21707-0.37823
   7   8  16  585.06    9.55  12-0.44537 0.71032 0.86848-0.55154 0.21397 0.43292
   7   9  17  220.47    9.39  11-0.44589 0.71157 0.86890-0.51294 0.21111 0.47626
   7  10  18    1.32    9.29  11-0.44595 0.71080 0.86895-0.47308 0.21079 0.51705
   7  11  19   34.39    9.14  12-0.44477 0.71112 0.86800-0.43261 0.21716 0.55108
   7  12  -9  353.80    8.95  12-0.44487 0.71113 0.86809-0.39649 0.21661-0.58041
   7  13  20  119.90   10.19  11-0.44657 0.71273 0.86943-0.35629 0.20742 0.60163
   7  16 -11    6.04    9.01  11-0.44566 0.71426 0.86872-0.23841 0.21235-0.65827
   7  19 -12  156.05    9.18  11-0.44657 0.71268 0.86943-0.12257 0.20743-0.69116
   7  20 -12   22.57    9.95  11-0.44581 0.71366 0.86883-0.08155 0.21158-0.69625
   7  21 -12   30.39    9.98  12-0.44503 0.71308 0.86821-0.04100 0.21576-0.70046
   8   6  10  275.06    8.45  12-0.44582 0.74864 0.86884-0.63144 0.21150 0.19283
   8   7  12  216.02    6.36  11-0.44765 0.75067 0.87027-0.59351 0.20144 0.28370
   8   8  14  464.29    9.15  11-0.44635 0.74968 0.86926-0.55338 0.20860 0.35775
   8   9  -5  257.38   10.61  12-0.44501 0.74839 0.86819-0.51427 0.21589-0.41754
   8  10  -6  525.84   10.73  12-0.44358 0.74708 0.86703-0.47357 0.22346-0.46559
   8  11  -7  221.02   10.40  12-0.44485 0.74865 0.86806-0.43543 0.21675-0.49932
   8  12  18   18.01    7.16  11-0.44742 0.75086 0.87009-0.39550 0.20272 0.52582
   8  13  19  162.31   10.78  11-0.44573 0.74968 0.86877-0.35459 0.21201 0.55600
   8  14  -9  464.25   10.52  12-0.44440 0.74800 0.86770-0.31734 0.21915-0.58287
   8  16 -10   55.58    8.64  12-0.44565 0.75047 0.86871-0.23935 0.21245-0.61623
   8  20 -11   15.03   10.04  11-0.44589 0.75146 0.86890-0.08146 0.21114-0.65526
   8  21 -11  103.83   10.97  12-0.44509 0.75029 0.86826-0.04189 0.21546-0.66038
   9   7   9  719.23    9.60  11-0.44649 0.78783 0.86937-0.59281 0.20787 0.15634
   9   8  12  132.17    8.53  12-0.44545 0.78660 0.86855-0.55115 0.21348 0.27182
   9   9  -3 1001.42   16.03  13-0.44253 0.78376 0.86615-0.51180 0.22896-0.34985
   9  10  15  682.29    9.87  12-0.44548 0.78625 0.86857-0.47304 0.21334 0.39308
   9  11  16   43.37    8.90  12-0.44571 0.78739 0.86876-0.43325 0.21211 0.43463
   9  12  17  126.81    8.94  12-0.44527 0.78621 0.86840-0.39420 0.21450 0.47245
   9  13  -7  208.79   10.29  12-0.44341 0.78510 0.86688-0.35516 0.22438-0.50704
   9  14  18   41.38    9.63  11-0.44711 0.78924 0.86986-0.31655 0.20442 0.52346
   9  17  -9  138.42   10.07  12-0.44374 0.78588 0.86716-0.19812 0.22265-0.58601
   9  21 -10   15.43    9.95  12-0.44594 0.78881 0.86894-0.04231 0.21084-0.61380
  10   8   8   72.06    8.13  12-0.44557 0.82462 0.86865-0.55181 0.21285 0.11082
  10   9  11  154.94    8.32  12-0.44561 0.82478 0.86868-0.51221 0.21264 0.23232
  10  10  13   78.06    7.92  12-0.44481 0.82390 0.86804-0.47240 0.21693 0.30761
  10  11  14  533.71    9.81  11-0.44598 0.82524 0.86897-0.43473 0.21061 0.35592
  10  12  15  106.18    9.15  11-0.44621 0.82608 0.86915-0.39541 0.20938 0.39757
  10  13  16  124.36    9.55  11-0.44584 0.82550 0.86886-0.35496 0.21141 0.43535
  10  14  17   25.05   11.15  12-0.44465 0.82398 0.86790-0.31452 0.21783 0.46830
  10  18  -8   70.89   10.30  12-0.44376 0.82337 0.86718-0.15840 0.22250-0.54523
  11  10   9   21.63    7.78  11-0.44672 0.86484 0.86955-0.47343 0.20656 0.15766
  11  12  13  114.01    8.80  12-0.44560 0.86282 0.86867-0.39339 0.21271 0.31265
  11  13  14  162.26    9.19  11-0.44582 0.86300 0.86885-0.35567 0.21149 0.35469
  11  14  15   14.82    9.20  12-0.44531 0.86239 0.86844-0.31513 0.21424 0.39272
  11  15  -5  134.60   10.55  12-0.44358 0.86144 0.86703-0.27635 0.22346-0.42559
  11  16  16  115.25   11.12  11-0.44645 0.86508 0.86934-0.23754 0.20805 0.43917
  11  17  -6   21.65   10.32  12-0.44298 0.86140 0.86653-0.19627 0.22661-0.46846
  11  20  -7    7.30   10.89  12-0.44424 0.86167 0.86757-0.08080 0.21999-0.50148
  11  21  -7   15.26   11.54  12-0.44385 0.86293 0.86725-0.03947 0.22207-0.50441
  11  22  -7    0.38   12.01  13-0.44273 0.86071 0.86632 0.00020 0.22793-0.50987
  12  11   4  189.28   11.26  12-0.44316 0.89813 0.86668-0.43246 0.22565-0.06405
  12  11   5   10.80    9.77  12-0.44401 0.90013 0.86738-0.43247 0.22120-0.01920
  12  11   6   15.64    9.95  12-0.44430 0.89994 0.86762-0.43251 0.21969 0.02329
  12  12  10  288.36    9.80  12-0.44428 0.89910 0.86760-0.39345 0.21980 0.18453
  12  13  11   92.57    8.71  11-0.44651 0.90221 0.86939-0.35616 0.20773 0.23765
  12  16  14   23.91    9.87  11-0.44618 0.90211 0.86913-0.23690 0.20953 0.35756
  12  17  -4  255.01   13.19  13-0.44158 0.89715 0.86535-0.19571 0.23382-0.39577
  12  17  15   21.86   11.77  12-0.44457 0.89986 0.86784-0.19599 0.21825 0.38709
  12  20  -5   69.82   12.71  13-0.44159 0.89696 0.86535-0.07745 0.23377-0.43572
  13  14   9  114.92    9.97  12-0.44432 0.93693 0.86763-0.31471 0.21959 0.14445
  13  15  10  140.58    9.37  11-0.44610 0.94004 0.86906-0.27648 0.20999 0.19424
  13  16  11   66.81    9.55  11-0.44650 0.94113 0.86938-0.23677 0.20777 0.23711
  13  17  12   38.47   10.19  12-0.44595 0.94034 0.86895-0.19674 0.21080 0.27430
  13  18  13   67.35   11.70  12-0.44459 0.93788 0.86785-0.15685 0.21813 0.30685
  14  17   7   18.33   10.34  12-0.44477 0.97770 0.86800-0.19574 0.21716 0.06652
  14  17   8   16.88   10.71  12-0.44354 0.97476 0.86699-0.19590 0.22371 0.10013
  14  18   9  243.66   12.32  12-0.44459 0.97600 0.86785-0.15748 0.21815 0.14598
  14  19  10   12.24   12.00  12-0.44382 0.97559 0.86722-0.11728 0.22223 0.18263
 -25   0   4   -0.16    5.51  12-0.44319-0.49992 0.86753-0.86546 0.21953-0.06584
 -25   1   0    1.76   13.60  15-0.43492-0.50815 0.86029-0.82326 0.26083-0.26032
 -25   2  -3   48.34   11.38  13-0.44131-0.50484 0.86596-0.79065 0.22933-0.35193
 -25   3  -5   38.77   10.14  13-0.44159-0.50346 0.86619-0.75103 0.22788-0.43173
 -24   0   2  220.41   17.14  15-0.43268-0.47620 0.85819-0.86044 0.27129-0.19062
 -24   2  -4    6.52   10.78  14-0.43860-0.46885 0.86361-0.78773 0.24302-0.40422
 -24   3  -6    9.51    9.70  13-0.44151-0.46632 0.86613-0.75085 0.22829-0.47173
 -23  -1   7    7.20   17.43  16-0.43057-0.44038 0.85615-0.89937 0.28095 0.00126
 -23   0  12   -4.10   11.60  13-0.44022-0.43597 0.86502-0.86735 0.23490 0.24421
 -23   1  -3   25.88   10.41  13-0.43899-0.43166 0.86396-0.82769 0.24106-0.36346
 -23   4  -8    3.35   10.85  13-0.44041-0.43057 0.86519-0.71123 0.23391-0.55888
 -22  -1  10   90.38   10.92  13-0.43938-0.39220 0.86430-0.90611 0.23913 0.16496
 -22   2  -6   25.15   10.66  13-0.44045-0.39065 0.86523-0.78945 0.23370-0.47700
 -22   4  -9   13.77    8.98  12-0.44216-0.38872 0.86668-0.71154 0.22490-0.58819
 -22   5 -10   17.02    9.63  12-0.44169-0.39038 0.86628-0.67205 0.22735-0.63188
 -22   6 -11   15.15   10.14  13-0.44159-0.38960 0.86620-0.63232 0.22787-0.67205
 -22   7 -12   12.34    8.05  12-0.44287-0.38896 0.86726-0.59420 0.22122-0.70627
 -21   0  -3   12.42    9.66  13-0.44076-0.35331 0.86549-0.86779 0.23213-0.35379
 -21   1  -5   51.60    9.68  13-0.44064-0.35383 0.86539-0.82925 0.23277-0.43622
 -21   8 -13  119.93   11.52  13-0.44128-0.35297 0.86593-0.55428 0.22948-0.75571
 -20  -2   8   37.06   11.96  13-0.43933-0.31692 0.86426-0.94576 0.23935 0.08377
 -20  -1  -1  412.50   12.59  14-0.43820-0.31946 0.86326-0.90503 0.24499-0.28568
 -20  -1  13   15.71   10.72  13-0.43878-0.31619 0.86377-0.90615 0.24212 0.28330
 -20   0  15   66.35   10.11  12-0.44235-0.31281 0.86684-0.86953 0.22391 0.38353
 -20   4 -10   82.99    9.28  12-0.44175-0.31466 0.86633-0.71122 0.22707-0.63093
 -20   5 -11   36.28    9.28  13-0.44161-0.31431 0.86621-0.67213 0.22776-0.67256
 -20   6 -12   24.50    8.96  13-0.44186-0.31282 0.86642-0.63279 0.22647-0.71031
 -20   9 -14   63.03   10.46  13-0.44105-0.31588 0.86574-0.51500 0.23064-0.79850
 -19  -2  10   80.22   10.13  13-0.44032-0.27806 0.86512-0.94626 0.23435 0.16954
 -19  -1  -2  169.67   10.27  13-0.43967-0.27924 0.86455-0.90696 0.23768-0.31933
 -19   0  16    8.33   10.13  12-0.44135-0.27641 0.86599-0.86658 0.22911 0.41643
 -19   2  -8  127.20    8.80  12-0.44175-0.27764 0.86633-0.78958 0.22702-0.54972
 -19   7 -13   19.97    9.23  13-0.44118-0.27838 0.86585-0.59333 0.22997-0.75698
 -19   8 -14  142.72    7.97  12-0.44287-0.27710 0.86726-0.55490 0.22122-0.78599
 -18  -2  11  132.46    8.65  12-0.44169-0.23902 0.86628-0.94698 0.22735 0.21731
 -18   0  -5  521.56   10.60  13-0.44025-0.24153 0.86506-0.86772 0.23471-0.43718
 -18   1  -7  772.11    9.75  12-0.44201-0.24041 0.86655-0.82879 0.22569-0.50770
 -18   1  18   41.75    9.96  12-0.44252-0.23712 0.86697-0.82970 0.22305 0.50569
 -18   8 -14    3.09    9.18  13-0.44091-0.24056 0.86562-0.55369 0.23138-0.79863
 -17  -2  12   72.37    8.20  13-0.44131-0.20140 0.86596-0.94598 0.22930 0.25566
 -17  -1  15   -2.97   10.08  13-0.44008-0.20895 0.86490-0.90695 0.23560 0.36655
 -17   0  17    4.01    9.70  12-0.44138-0.20088 0.86602-0.86661 0.22896 0.45712
 -17   3 -10  233.23    9.05  12-0.44170-0.20217 0.86629-0.75040 0.22732-0.63106
 -17   4 -11  254.86    9.03  13-0.44139-0.20243 0.86603-0.71196 0.22888-0.67404
 -17   5 -12  693.17    9.88  13-0.44146-0.20287 0.86609-0.67233 0.22852-0.71343
 -17   6 -13   38.63    8.44  12-0.44208-0.19944 0.86661-0.63270 0.22532-0.74968
 -17   9 -15   78.46   10.00  13-0.44153-0.20125 0.86615-0.51502 0.22818-0.83438
 -17  11 -16   16.96   10.21  13-0.44107-0.20208 0.86576-0.43559 0.23053-0.87819
 -16  -3   7  285.95   10.35  13-0.44060-0.16496 0.86535-0.98556 0.23296 0.05008
 -16  -3   8  882.99   12.35  13-0.43872-0.16688 0.86372-0.98314 0.24238 0.08106
 -16  -2  -1  261.73   11.35  14-0.43775-0.16815 0.86286-0.94372 0.24718-0.28778
 -16  -1  -4  788.21   10.55  13-0.44172-0.16457 0.86630-0.90752 0.22722-0.38874
 -16  -1  15   47.09    8.43  12-0.44292-0.16085 0.86730-0.90860 0.22094 0.38582
 -16   0  -6  457.98    9.29  13-0.44164-0.16465 0.86624-0.86835 0.22762-0.46983
 -16   0  17   25.49    9.00  12-0.44271-0.16225 0.86713-0.86945 0.22203 0.46675
 -16   1  19   10.82   10.30  13-0.44104-0.16335 0.86573-0.82785 0.23071 0.53663
 -16   2  -9  168.00    8.34  13-0.44151-0.16380 0.86613-0.79016 0.22826-0.59224
 -16   6 -13  390.05    8.90  13-0.44094-0.16527 0.86564-0.63338 0.23123-0.75723
 -16   7 -14  246.10    9.03  12-0.44225-0.16417 0.86675-0.59356 0.22444-0.78903
 -16  10 -16    3.40    7.62  12-0.44335-0.15543 0.86766-0.47026 0.21868-0.86964
 -15  -3   9  263.26   10.12  13-0.43963-0.12791 0.86452-0.98409 0.23784 0.12588
 -15  -2  13  112.26    8.38  12-0.44166-0.12519 0.86626-0.94647 0.22750 0.29798
 -15   1  -8  343.00    8.52  12-0.44242-0.12586 0.86689-0.82927 0.22358-0.54601
 -15   1  19   28.22    9.60  12-0.44225-0.12422 0.86675-0.82908 0.22444 0.54498
 -15   7 -14  329.28    9.51  13-0.44137-0.12642 0.86601-0.59442 0.22898-0.79515
 -15  10 -16   51.68    9.33  12-0.44185-0.12415 0.86641-0.47563 0.22654-0.87164
 -15  12 -17    0.87   10.13  13-0.44197-0.11713 0.86652-0.39094 0.22588-0.91360
 -14  -3   9   38.60    8.08  12-0.44225-0.08610 0.86675-0.98663 0.22446 0.13961
 -14  -2  -2  119.69    9.52  13-0.44043-0.08936 0.86521-0.94558 0.23381-0.31469
 -14  -1  16  400.64    9.24  13-0.44084-0.08863 0.86556-0.90564 0.23172 0.41452
 -14   0  18  174.41   10.79  13-0.44016-0.08857 0.86498-0.86582 0.23519 0.49220
 -14   1  -8   57.26    8.05  13-0.44139-0.08796 0.86603-0.82935 0.22891-0.55299
 -14   8 -15  120.51    7.13  12-0.44262-0.08784 0.86706-0.55449 0.22249-0.82832
 -14  10 -16   54.31   10.05  13-0.44138-0.08785 0.86602-0.47497 0.22897-0.87628
 -14  12 -17   72.86   10.76  13-0.44159-0.08727 0.86620-0.39652 0.22786-0.91445
 -13  -3  10  125.20    9.63  13-0.44013-0.05154 0.86495-0.98435 0.23532 0.16873
 -13  -1  16  184.21    9.20  12-0.44149-0.04973 0.86611-0.90683 0.22840 0.41815
 -13   0  18   -1.84    9.03  13-0.44124-0.05617 0.86590-0.86741 0.22969 0.49401
 -13   2  21   35.60   10.06  13-0.44064-0.04862 0.86539-0.78708 0.23274 0.61447
 -13   8 -15  139.50    9.14  12-0.44183-0.04988 0.86640-0.55368 0.22662-0.83185
 -13  10 -16   96.45    8.76  13-0.44079-0.05095 0.86552-0.47554 0.23199-0.87876
 -13  12 -17  114.55    9.91  13-0.44136-0.05056 0.86600-0.39754 0.22908-0.91665
 -12  -3  10    4.76    8.05  12-0.44141-0.01257 0.86605-0.98444 0.22878 0.17470
 -12  -1  16  127.54    8.88  12-0.44181-0.01078 0.86638-0.90701 0.22673 0.42034
 -12   0  18   75.51    9.10  13-0.44135-0.01135 0.86600-0.86627 0.22909 0.49883
 -12   2  21   92.25    9.72  13-0.44069-0.01135 0.86543-0.78727 0.23251 0.61593
 -12   3  22  145.89   11.85  12-0.44162-0.00944 0.86622-0.74917 0.22770 0.66176
 -12   8 -15   50.59    8.49  12-0.44170-0.01162 0.86628-0.55315 0.22733-0.83346
 -12  12 -17  139.64    9.33  13-0.44111-0.01277 0.86579-0.39712 0.23032-0.91802
 -11  -3  10  455.91    9.35  13-0.44099 0.02482 0.86569-0.98439 0.23096 0.17302
 -11  -1  16   64.81    8.61  12-0.44179 0.02694 0.86637-0.90689 0.22682 0.41965
 -11   0  18    3.52    8.78  12-0.44157 0.02591 0.86618-0.86598 0.22800 0.49863
 -11   2  21   56.07    9.34  13-0.44066 0.02694 0.86541-0.78707 0.23263 0.61560
 -11   3  22   27.60   10.39  12-0.44163 0.02651 0.86623-0.74878 0.22767 0.66165
 -11   8 -15  217.34    8.82  12-0.44170 0.02532 0.86629-0.55380 0.22728-0.83257
 -11  12 -17    9.85    8.78  13-0.44124 0.02515 0.86590-0.39501 0.22969-0.91855
 -11  14 -18   87.33    7.87  12-0.44303 0.02622 0.86739-0.31970 0.22038-0.94732
 -10  -3  10  368.97   10.42  13-0.43984 0.06191 0.86470-0.98366 0.23681 0.16708
 -10  -1  16   89.08    8.66  13-0.44136 0.06412 0.86600-0.90616 0.22907 0.41695
 -10   0  18   -6.81    8.15  13-0.44107 0.05780 0.86576-0.86731 0.23053 0.49348
 -10   3  22   28.44   10.31  13-0.44139 0.06438 0.86602-0.74813 0.22893 0.65969
 -10   8 -15   17.96    8.09  12-0.44194 0.06471 0.86649-0.55328 0.22604-0.83063
 -10  10 -16  307.85    8.62  13-0.44103 0.06261 0.86572-0.47563 0.23074-0.87754
 -10  12 -17   57.65    9.39  13-0.44138 0.06376 0.86602-0.39586 0.22895-0.91619
 -10  14 -18  123.06    7.81  12-0.44335 0.06447 0.86766-0.31937 0.21868-0.94549
 -10  15 -18   53.77   10.15  13-0.44107 0.06271 0.86576-0.27827 0.23053-0.95849
  -9  -3   2  104.31   19.33  16-0.43062 0.09128 0.85621-0.97534 0.28070-0.19991
  -9  -3   9  169.36    8.68  12-0.44158 0.10178 0.86619-0.98506 0.22790 0.13570
  -9  -2  13  130.34    8.23  12-0.44279 0.10252 0.86719-0.94663 0.22165 0.30387
  -9  -1  16   63.10    8.18  13-0.44037 0.10162 0.86516-0.90487 0.23411 0.41205
  -9   1  -8  156.92    9.06  13-0.44160 0.10147 0.86620-0.82882 0.22785-0.55015
  -9   1  19  322.51    7.25  12-0.44319 0.10362 0.86753-0.82878 0.21953 0.54888
  -9   3  22   27.94    9.41  13-0.44041 0.10232 0.86519-0.74770 0.23391 0.65529
  -9   4  23  112.80   10.28  13-0.44081 0.10228 0.86553-0.70874 0.23188 0.69727
  -9   8 -15   96.37    6.40  12-0.44311 0.10301 0.86746-0.55530 0.21995-0.82524
  -9  10 -16   11.47    8.72  12-0.44158 0.10177 0.86618-0.47402 0.22794-0.87460
  -9  12 -17  144.08    9.13  12-0.44183 0.10078 0.86640-0.39649 0.22664-0.91247
  -9  15 -18  117.01   10.30  13-0.44154 0.10133 0.86615-0.27837 0.22814-0.95505
  -8  -3   3  940.27   17.51  13-0.43893 0.13670 0.86390-0.98291 0.24138-0.11978
  -8  -3   8  953.63   10.77  12-0.44162 0.13920 0.86622-0.98507 0.22769 0.09580
  -8  -2  13   45.16    7.93  13-0.44103 0.13978 0.86572-0.94476 0.23077 0.29436
  -8   1  19  111.32    9.00  12-0.44191 0.14086 0.86646-0.82801 0.22624 0.54156
  -8   7 -14  123.79    8.55  13-0.44160 0.13870 0.86620-0.59319 0.22782-0.79287
  -8  10 -16  210.20    6.84  12-0.44271 0.13936 0.86713-0.47582 0.22207-0.86829
  -8  12 -17   79.88    6.81  12-0.44303 0.14056 0.86739-0.39757 0.22037-0.90659
  -8  15 -18  123.80    9.47  12-0.44238 0.13946 0.86685-0.27889 0.22380-0.94997
  -8  16 -18    2.76    9.73  13-0.44041 0.13854 0.86519-0.23711 0.23391-0.96138
  -7  -3   5  498.02   12.86  13-0.43964 0.17582 0.86452-0.98315 0.23783-0.03601
  -7  -3   6 1195.53   13.63  13-0.44039 0.17599 0.86517-0.98372 0.23404 0.00851
  -7  -2  -1  899.31   17.56  13-0.43990 0.17553 0.86475-0.94441 0.23648-0.27624
  -7  -2  12  962.87    8.01  12-0.44311 0.17845 0.86746-0.94672 0.21995 0.26541
  -7  -1  15   78.03    8.18  12-0.44203 0.17909 0.86657-0.90671 0.22559 0.37991
  -7   0  -6   -3.29    6.94  12-0.44335 0.18035 0.86766-0.86551 0.21868-0.46646
  -7   0  17    0.15    7.91  13-0.44157 0.17679 0.86618-0.86789 0.22800 0.46269
  -7   1  19   39.94    8.68  13-0.44041 0.17838 0.86519-0.82638 0.23391 0.53279
  -7   2  -9   51.64    8.26  12-0.44222 0.17793 0.86672-0.78968 0.22462-0.58659
  -7   2  20   68.11    8.68  12-0.44251 0.17972 0.86696-0.78914 0.22310 0.58617
  -7   6 -13  118.90    8.47  13-0.44136 0.17676 0.86600-0.63242 0.22904-0.75383
  -7   7 -14  240.13    6.55  12-0.44327 0.17777 0.86759-0.59391 0.21910-0.78431
  -7  13 -17   92.62    9.09  13-0.44121 0.17740 0.86588-0.35630 0.22980-0.91710
  -7  16 -18   96.62   10.89  13-0.44157 0.17788 0.86618-0.23933 0.22800-0.95423
  -6   2  20    1.70    8.56  13-0.44116 0.20927 0.86583-0.78886 0.23011 0.57658
  -6   3 -10  758.62    7.71  12-0.44319 0.21540 0.86753-0.75104 0.21953-0.62340
  -6   3  21  212.83    9.35  12-0.44237 0.21690 0.86685-0.74888 0.22385 0.62507
  -6   4 -11  899.18    9.75  12-0.44203 0.21447 0.86656-0.71072 0.22561-0.66934
  -6   4  22   16.85    7.29  12-0.44287 0.21683 0.86726-0.71016 0.22122 0.66882
  -6   5 -12  190.73    8.54  12-0.44225 0.21467 0.86675-0.67174 0.22445-0.70842
  -6   5  23  206.49   10.04  12-0.44267 0.21765 0.86710-0.67088 0.22226 0.70803
  -6   6 -13  306.91    6.81  12-0.44351 0.21610 0.86779-0.63337 0.21783-0.74252
  -6   9 -15  198.38    8.31  12-0.44218 0.21477 0.86669-0.51447 0.22484-0.82973
  -6  11 -16  221.97    8.79  13-0.44154 0.21431 0.86616-0.43582 0.22811-0.87373
  -6  13 -17  160.66    6.90  12-0.44271 0.21538 0.86713-0.35715 0.22207-0.90848
  -6  16 -18   11.44    8.11  12-0.44335 0.21850 0.86766-0.23888 0.21868-0.94576
  -6  17 -18   63.51   10.94  13-0.44145 0.21555 0.86608-0.19917 0.22861-0.95559
  -5  -1  14   19.35    8.17  13-0.44149 0.25362 0.86611-0.90541 0.22838 0.33775
  -5   0  -5    4.38    9.88  12-0.44203 0.25277 0.86657-0.86708 0.22557-0.42768
  -5   0  16   -0.64    5.83  12-0.44287 0.24865 0.86726-0.86890 0.22122 0.42594
  -5   1  18  214.70    8.50  12-0.44158 0.25369 0.86619-0.82728 0.22791 0.49953
  -5   4  22   11.53    9.01  13-0.44102 0.25360 0.86571-0.70835 0.23079 0.65764
  -5   5  23  331.35   10.28  13-0.44091 0.25330 0.86562-0.66898 0.23139 0.69784
  -5   8 -14  203.12    8.90  13-0.44154 0.25240 0.86615-0.55360 0.22813-0.79298
  -5  14 -17  706.00    9.92  13-0.44168 0.25214 0.86627-0.31740 0.22740-0.91366
  -5  17 -18    5.78    7.82  12-0.44335 0.25647 0.86766-0.19945 0.21868-0.94528
  -4  -2   2 1242.95   22.59  13-0.43958 0.28929 0.86447-0.94328 0.23810-0.15700
  -4  -2   9  663.06   10.44  12-0.44196 0.29111 0.86651-0.94561 0.22595 0.13798
  -4  -1  13   63.75    7.97  12-0.44233 0.29184 0.86681-0.90646 0.22404 0.30190
  -4   2  19   16.11    8.62  12-0.44173 0.29123 0.86631-0.78769 0.22717 0.54126
  -4   3  -9  756.03    9.95  13-0.44094 0.28969 0.86564-0.74969 0.23123-0.59379
  -4   3  20   48.02    6.66  12-0.44359 0.29450 0.86785-0.74949 0.21741 0.59149
  -4   7 -13  180.14    8.82  12-0.44192 0.29032 0.86647-0.59244 0.22618-0.75063
  -4  10 -15  901.95    9.11  12-0.44216 0.29034 0.86667-0.47461 0.22493-0.83021
  -4  12 -16  118.70    8.20  12-0.44221 0.29105 0.86672-0.39606 0.22466-0.87022
  -4  15 -17  164.84    9.64  13-0.44152 0.29126 0.86614-0.27820 0.22821-0.91471
  -3  -1  12   55.04    8.78  12-0.44216 0.32870 0.86668-0.90702 0.22491 0.25897
  -3   0  15    0.07    8.39  13-0.44091 0.32836 0.86562-0.86565 0.23138 0.37512
  -3   1  17  158.12    8.78  13-0.44100 0.32860 0.86570-0.82590 0.23090 0.45595
  -3   3  20   55.51    8.31  13-0.44077 0.32912 0.86550-0.74707 0.23207 0.57601
  -3   4  21   82.83    9.17  12-0.44173 0.32998 0.86632-0.70935 0.22714 0.62151
  -3   5 -11   14.73    5.84  12-0.44359 0.33128 0.86785-0.67226 0.21741-0.66080
  -3   5  22  155.43    9.80  12-0.44195 0.33043 0.86649-0.67010 0.22603 0.66351
  -3   6  23   17.29   10.06  12-0.44160 0.32955 0.86620-0.62986 0.22782 0.70235
  -3   9 -14  585.57    9.23  12-0.44175 0.32781 0.86633-0.51372 0.22705-0.79194
  -3  11 -15  250.49    8.10  13-0.44079 0.32784 0.86551-0.43512 0.23199-0.83774
  -3  13 -16   97.54    8.82  13-0.44153 0.32936 0.86615-0.35646 0.22817-0.87357
  -3  16 -17   29.82    9.64  13-0.44165 0.32931 0.86625-0.23747 0.22757-0.91319
  -2  -1  11  232.46    9.18  13-0.44081 0.36567 0.86554-0.90493 0.23186 0.21207
  -2   0  14 1521.55   10.46  13-0.44137 0.36633 0.86601-0.86608 0.22901 0.33674
  -2   1  16   31.83    8.61  12-0.44222 0.36679 0.86672-0.82802 0.22461 0.42151
  -2   2  18   34.30    8.01  13-0.44099 0.36659 0.86569-0.78659 0.23094 0.49482
  -2   3  -8  600.31   10.21  13-0.44160 0.36588 0.86620-0.74962 0.22783-0.54971
  -2   3  19  219.64    6.61  12-0.44311 0.36853 0.86746-0.74931 0.21995 0.54845
  -2   7 -12  559.55    8.87  13-0.44058 0.36495 0.86534-0.59210 0.23303-0.71725
  -2   8 -13  626.83    7.47  12-0.44287 0.36691 0.86726-0.55387 0.22122-0.74623
  -2  14 -16    8.12    8.88  13-0.44148 0.36645 0.86611-0.31590 0.22842-0.87432
  -2  17 -17   31.92    7.36  12-0.44303 0.36973 0.86739-0.19918 0.22038-0.90678
  -2  18 -17  106.44   10.82  13-0.44135 0.36787 0.86599-0.15996 0.22913-0.91529
  -1  -1   8  863.71    9.08  12-0.44319 0.40587 0.86753-0.90656 0.21953 0.10383
  -1   0  13  -14.69    8.03  13-0.44107 0.39977 0.86576-0.86627 0.23053 0.29544
  -1   1  -4 3077.12   20.62  12-0.44222 0.40405 0.86672-0.82832 0.22460-0.38496
  -1   1  15  124.10    6.49  12-0.44279 0.40602 0.86719-0.82778 0.22165 0.38414
  -1   2  17  219.99    8.87  12-0.44192 0.40511 0.86647-0.78827 0.22619 0.46075
  -1   4  20  141.92    8.49  13-0.44102 0.40435 0.86571-0.70804 0.23081 0.57731
  -1   5  21  282.66    9.29  12-0.44159 0.40520 0.86620-0.66971 0.22787 0.62094
  -1   6  22   41.88    9.63  12-0.44157 0.40544 0.86618-0.62994 0.22797 0.66123
  -1   7  23   -7.28    9.47  13-0.44116 0.39869 0.86583-0.59220 0.23011 0.69925
  -1   9 -13  233.71    8.42  13-0.44092 0.40365 0.86563-0.51351 0.23132-0.75595
  -1  15 -16   20.32    8.39  12-0.44234 0.40651 0.86683-0.27700 0.22398-0.86971
   0   0  11    5.72    8.44  13-0.44158 0.44309 0.86619-0.86736 0.22793 0.22054
   0   1  14 1434.17   10.76  12-0.44216 0.44306 0.86667-0.82736 0.22494 0.34150
   0   2  -5   -1.40    8.38  12-0.44295 0.44757 0.86733-0.78519 0.22080-0.42487
   0   2  16  993.64    9.35  12-0.44250 0.44346 0.86696-0.78812 0.22314 0.42407
   0   3  18  888.71    9.11  13-0.44064 0.44141 0.86539-0.74713 0.23274 0.49473
   0   4  -8 5088.31   15.17  12-0.44279 0.44257 0.86719-0.71061 0.22165-0.54470
   0   4  19  -13.79    8.21  13-0.44206 0.43870 0.86659-0.71091 0.22546 0.54785
   0   5  -9   -5.71    8.59  13-0.44107 0.44707 0.86576-0.66434 0.23053-0.59696
   0   5  20  232.23    6.94  12-0.44359 0.44486 0.86785-0.67092 0.21741 0.59169
   0   7 -11   -6.23    8.25  12-0.44157 0.44262 0.86618-0.59091 0.22800-0.67278
   0   7  22   71.24    7.33  12-0.44327 0.44513 0.86759-0.59217 0.21910 0.67060
   0   8 -12 1285.58    8.36  12-0.44351 0.44364 0.86779-0.55438 0.21783-0.70259
   0   8  23    8.16   10.49  12-0.44206 0.44376 0.86659-0.55147 0.22546 0.70545
   0  14 -15    9.98    8.19  12-0.44134 0.44378 0.86599-0.31393 0.22914-0.83825
   0  17 -16  245.87   10.36  13-0.44160 0.44282 0.86620-0.19865 0.22783-0.87337
   1   0   9   -6.42    9.16  13-0.44136 0.47726 0.86600-0.86630 0.22905 0.13723
   1   1  13  236.19    8.25  13-0.44062 0.47907 0.86537-0.82615 0.23284 0.29196
   1   2  15   34.89    8.34  12-0.44201 0.48162 0.86655-0.78759 0.22568 0.38103
   1   3  17  446.48    9.42  13-0.44113 0.47997 0.86581-0.74736 0.23022 0.45687
   1   4  18   65.01    6.33  12-0.44351 0.48290 0.86779-0.71018 0.21783 0.51016
   1   9 -12   39.43    8.10  12-0.44197 0.48072 0.86652-0.51285 0.22589-0.70960
   1   9  23   69.63    9.87  12-0.44271 0.48326 0.86713-0.51325 0.22207 0.70841
   1  15 -15  182.42    9.06  12-0.44200 0.48052 0.86654-0.27716 0.22574-0.83087
   1  19 -16   13.11    8.16  12-0.44295 0.48347 0.86733-0.11982 0.22080-0.86617
   2   1  11  225.51    9.17  13-0.44135 0.51750 0.86599-0.82655 0.22911 0.21459
   2   2  14  533.01    9.18  13-0.44069 0.51707 0.86543-0.78677 0.23248 0.33301
   2   3  16   82.58    8.20  13-0.44075 0.51741 0.86548-0.74737 0.23220 0.41378
   2   6  20  109.71    8.99  13-0.44107 0.51856 0.86575-0.62891 0.23057 0.57766
   2   7  21   56.94    8.77  13-0.44100 0.51847 0.86570-0.58967 0.23089 0.61791
   2  10 -12  370.25    8.46  12-0.44183 0.51779 0.86640-0.47384 0.22661-0.71056
   2  12 -13  170.86    8.22  13-0.44050 0.51683 0.86527-0.39484 0.23347-0.75807
   2  14 -14  409.21    8.99  13-0.44150 0.51804 0.86612-0.31646 0.22836-0.79329
   2  17 -15   98.31    9.63  12-0.44198 0.51905 0.86652-0.19776 0.22587-0.83039
   2  18 -15   15.27    9.13  13-0.44066 0.51858 0.86541-0.15641 0.23263-0.83951
   3   1   4  935.63   15.29  12-0.44180 0.55562 0.86638-0.82684 0.22676-0.06556
   3   1   5  253.57    8.78  12-0.44359 0.55734 0.86785-0.82815 0.21741-0.01524
   3   1   6  359.25    8.29  12-0.44335 0.55771 0.86766-0.82771 0.21868 0.02381
   3   1   7  452.31   10.85  12-0.44208 0.55645 0.86661-0.82693 0.22533 0.05742
   3   2  12 1845.52   11.24  12-0.44193 0.55650 0.86648-0.78739 0.22610 0.25954
   3   4  -5 1022.72   12.87  13-0.44103 0.55431 0.86573-0.70950 0.23073-0.43150
   3   4  16  151.27    6.25  12-0.44319 0.55794 0.86753-0.70962 0.21953 0.42738
   3   6  19  405.43    9.36  12-0.44154 0.55650 0.86615-0.62970 0.22813 0.54015
   3   7  20  219.84    9.27  12-0.44174 0.55756 0.86632-0.59085 0.22708 0.58157
   3   8  21   88.06    9.62  12-0.44149 0.55720 0.86611-0.55056 0.22840 0.62036
   3  11 -12  470.51    8.79  12-0.44288 0.55684 0.86727-0.43517 0.22115-0.70567
   3  13 -13  264.42    8.83  12-0.44214 0.55621 0.86666-0.35584 0.22501-0.74940
   3  16 -14  400.93    9.64  13-0.44129 0.55586 0.86595-0.23797 0.22940-0.79514
   4   2   9  630.09    7.92  12-0.44319 0.59552 0.86753-0.78812 0.21953 0.14483
   4   3  13  164.93    8.73  13-0.44104 0.59327 0.86573-0.74729 0.23069 0.29441
   4   4  15  145.65    8.75  13-0.44151 0.59407 0.86613-0.70840 0.22827 0.37760
   4   6  18   95.26    8.68  13-0.44139 0.59470 0.86603-0.62918 0.22891 0.49831
   4   7  19  121.03    9.12  12-0.44202 0.59547 0.86655-0.59086 0.22567 0.54256
   4   8  20   23.62    9.28  12-0.44204 0.59536 0.86657-0.55116 0.22554 0.58317
   4   9  21   40.56   10.19  13-0.44131 0.59460 0.86596-0.51063 0.22934 0.61991
   4  11 -11   71.73    8.33  13-0.44049 0.59293 0.86526-0.43355 0.23349-0.67655
   4  15 -13  147.62    9.06  13-0.44133 0.59410 0.86598-0.27636 0.22920-0.75386
   4  18 -14  127.15    9.16  12-0.44283 0.59551 0.86723-0.15959 0.22142-0.78603
   4  19 -14   11.85   10.03  13-0.44148 0.59514 0.86610-0.11816 0.22845-0.79366
   4  20 -14  206.92   10.39  13-0.44036 0.59343 0.86515-0.07970 0.23418-0.79978
   5   3  10  263.15    6.82  12-0.44335 0.63357 0.86766-0.74889 0.21868 0.18583
   5   4  -2  286.91   15.42  13-0.43994 0.62870 0.86478-0.70796 0.23632-0.31626
   5   4  13  371.75    6.62  12-0.44287 0.63358 0.86726-0.70908 0.22122 0.30477
   5   5  -4   44.80   10.25  12-0.44216 0.63123 0.86667-0.67062 0.22494-0.38518
   5   5  15   82.94    7.79  12-0.44271 0.63351 0.86713-0.66990 0.22207 0.38378
   5   7  18   64.09    8.76  13-0.44147 0.63308 0.86610-0.58982 0.22847 0.49926
   5   8  19  678.18   10.41  12-0.44172 0.63308 0.86631-0.55150 0.22719 0.54152
   5   9  20   39.50    9.75  13-0.44143 0.63336 0.86606-0.51068 0.22870 0.58011
   5  14 -12   89.16    6.18  12-0.44335 0.63416 0.86766-0.31694 0.21868-0.70342
   5  17 -13  212.30    9.00  12-0.44257 0.63269 0.86702-0.19868 0.22276-0.74697
   5  18 -13  161.14    9.27  13-0.44064 0.63178 0.86539-0.15778 0.23274-0.75751
   6   4  11  911.95    9.90  13-0.44156 0.66973 0.86617-0.70801 0.22801 0.21689
   6   6  -4  129.08    9.62  13-0.44123 0.66857 0.86589-0.63023 0.22971-0.39026
   6   6  15  304.66    6.49  12-0.44295 0.67148 0.86733-0.63060 0.22080 0.38590
   6   8  18   -4.76    8.73  13-0.44120 0.66511 0.86586-0.55113 0.22990 0.50196
   6   9  19   25.00    9.30  13-0.44090 0.67033 0.86561-0.51006 0.23142 0.53744
   6  12 -10  130.43    7.99  12-0.44260 0.67061 0.86704-0.39486 0.22261-0.62566
   6  12  21   90.36   10.19  12-0.44222 0.67355 0.86673-0.39300 0.22460 0.62531
   6  14 -11  541.40    9.34  12-0.44182 0.66965 0.86639-0.31572 0.22668-0.67022
   6  17 -12   62.69    9.34  13-0.44125 0.67093 0.86591-0.19716 0.22961-0.71319
   7   5  11  454.66    8.89  12-0.44189 0.70822 0.86645-0.66899 0.22633 0.21859
   7   7  15   94.31    8.32  12-0.44226 0.70944 0.86676-0.59052 0.22441 0.38151
   7  11  -8  346.08   10.15  13-0.43988 0.70542 0.86473-0.43241 0.23660-0.55881
   7  12  20   43.41   10.51  12-0.44196 0.70992 0.86650-0.39316 0.22598 0.58351
   7  14 -10  414.23    9.13  13-0.44185 0.70768 0.86641-0.31586 0.22653-0.62978
   7  17 -11    7.56    9.00  13-0.44041 0.70710 0.86519-0.19550 0.23391-0.67779
   8   6  11  442.24    8.62  13-0.44125 0.74518 0.86591-0.62878 0.22963 0.21519
   8   7  13  359.98    8.89  12-0.44222 0.74698 0.86672-0.59028 0.22463 0.30152
   8   8  15   36.51    8.10  13-0.44101 0.74513 0.86570-0.54968 0.23087 0.37459
   8   9  16  367.08    9.05  12-0.44201 0.74701 0.86655-0.51187 0.22568 0.42184
   8  10  17   98.18    8.61  12-0.44239 0.74796 0.86687-0.47208 0.22371 0.46476
   8  11  18  291.20   10.02  12-0.44193 0.74768 0.86649-0.43289 0.22609 0.50218
   8  12  19   64.96    9.35  13-0.44105 0.74608 0.86574-0.39220 0.23063 0.53710
   8  17 -10  131.52    9.08  13-0.44102 0.74583 0.86571-0.19727 0.23080-0.63433
   9   7  10   18.28    8.01  12-0.44230 0.78504 0.86679-0.59007 0.22418 0.18036
   9   9  14  264.87    8.59  12-0.44272 0.78541 0.86714-0.51204 0.22200 0.34454
   9  12  -6   31.99    9.70  14-0.43837 0.78019 0.86341-0.38998 0.24415-0.48585
   9  13  18   28.74    9.38  12-0.44234 0.78671 0.86683-0.35331 0.22396 0.50529
   9  14  19  118.70   10.50  13-0.44071 0.78253 0.86545-0.31385 0.23239 0.53715
   9  15  -8   29.35    9.49  13-0.44027 0.78245 0.86507-0.27428 0.23463-0.55657
   9  18  -9  220.11   11.07  13-0.43905 0.78075 0.86401-0.15546 0.24078-0.60329
  10   8   2  296.56   13.11  14-0.43856 0.81809 0.86358-0.54856 0.24320-0.16216
  10   8   9   38.26    7.91  12-0.44165 0.82233 0.86625-0.55000 0.22755 0.13528
  10   9  12  469.11    8.87  13-0.44076 0.82035 0.86549-0.51029 0.23212 0.25322
  10  10  -2  684.13   17.44  14-0.43501 0.81430 0.86037-0.46653 0.26040-0.34037
  10  11  15   20.04    8.36  13-0.44039 0.82103 0.86518-0.43068 0.23401 0.37238
  10  12  16   40.21    8.53  13-0.44067 0.82100 0.86542-0.39162 0.23258 0.41374
  10  14  -6  505.85   11.26  13-0.44029 0.81970 0.86509-0.31398 0.23454-0.47601
  10  15  18   39.71   11.06  13-0.44128 0.82192 0.86593-0.27405 0.22949 0.49888
  10  16  -7  110.53   10.16  13-0.43940 0.81952 0.86432-0.23389 0.23901-0.52064
  10  19  -8    6.94   10.42  13-0.43983 0.81996 0.86469-0.11697 0.23685-0.55844
  11   9   5  943.95   12.45  13-0.44010 0.85771 0.86492-0.50997 0.23548-0.03265
  11   9   6  925.44   12.08  13-0.44054 0.85822 0.86530-0.51014 0.23325 0.01001
  11   9   7  668.63   11.26  13-0.43984 0.85734 0.86470-0.50966 0.23679 0.04662
  11  10  10  396.02    8.75  12-0.44233 0.86100 0.86682-0.47262 0.22403 0.18108
  11  11  12  158.49    8.74  12-0.44236 0.86131 0.86684-0.43286 0.22388 0.26206
  11  14  -4  151.15   11.67  14-0.43683 0.85466 0.86203-0.31055 0.25168-0.41259
  11  15  16   82.47    9.71  12-0.44234 0.86300 0.86683-0.27428 0.22396 0.42350
  12  11   3   17.49   11.84  14-0.43666 0.89263 0.86188-0.42779 0.25252-0.13101
  12  11   7  554.62    9.75  12-0.44183 0.89824 0.86640-0.43276 0.22665 0.05688
  12  11   8   39.16    9.40  13-0.44033 0.89677 0.86512-0.43045 0.23431 0.08926
  12  13  12  183.03    9.22  12-0.44156 0.89833 0.86617-0.35341 0.22804 0.25781
  12  14  13   30.10    9.08  12-0.44205 0.89975 0.86659-0.31364 0.22547 0.30134
  12  15  14   80.66    9.72  12-0.44169 0.89939 0.86628-0.27422 0.22733 0.33913
  12  16  15   91.95    9.63  13-0.44063 0.89752 0.86538-0.23419 0.23278 0.37295
  12  21  -5   54.65   12.20  13-0.43923 0.89586 0.86416-0.03648 0.23988-0.44109
  12  22  -5   43.72   13.81  14-0.43797 0.89404 0.86306 0.00362 0.24609-0.44648
  13  13   4  150.55   11.73  14-0.43805 0.93146 0.86313-0.35056 0.24571-0.08325
  13  13   5  641.11   12.65  13-0.43996 0.93400 0.86481-0.35226 0.23618-0.03342
  13  13   6  188.65   10.37  13-0.44041 0.93461 0.86519-0.35225 0.23392 0.00954
  13  13   7  313.30   10.66  13-0.43982 0.93352 0.86468-0.35228 0.23692 0.04683
  13  14  10   28.96    9.48  13-0.43954 0.93456 0.86444-0.31148 0.23833 0.16710
  13  15  11  180.14    9.17  13-0.44148 0.93617 0.86610-0.27437 0.22844 0.21692
  13  16  12   49.80    9.41  12-0.44156 0.93682 0.86617-0.23443 0.22803 0.25797
  13  17  13   24.57   10.38  13-0.44074 0.93580 0.86547-0.19390 0.23224 0.29362
  14  16   5   14.14   11.37  14-0.43812 0.97099 0.86319-0.23153 0.24535-0.04276
  14  16   6   49.35   10.21  13-0.43965 0.97150 0.86454-0.23355 0.23774 0.00569
  14  16   7    9.67   11.74  13-0.43979 0.97028 0.86466-0.23426 0.23703 0.04673
  14  17   9  114.39   11.24  13-0.44003 0.97181 0.86486-0.19476 0.23584 0.12913
  14  18  10   33.85   11.08  13-0.44032 0.97275 0.86511-0.15514 0.23437 0.17065
 -26   2  -1   19.23   12.12  14-0.43672-0.54657 0.86160-0.78645 0.25411-0.29468
 -26   3  -3   29.56   13.59  15-0.43487-0.54752 0.85988-0.74550 0.26301-0.38536
 -25   0   8    1.02   18.82  15-0.43231-0.51119 0.85745-0.86014 0.27500 0.04730
 -25   4  -6   13.28   12.13  14-0.43634-0.50608 0.86125-0.70716 0.25596-0.49762
 -24   0  11    2.84   13.06  14-0.43632-0.47079 0.86123-0.86365 0.25603 0.18773
 -24   4  -7  127.42   10.95  14-0.43853-0.46908 0.86323-0.70985 0.24520-0.52894
 -24   5  -8   18.39   11.35  14-0.43708-0.47164 0.86193-0.66956 0.25234-0.57692
 -23  -1   8   16.78   15.01  15-0.43160-0.43815 0.85676-0.89949 0.27827 0.04442
 -23   0   0    3.05   12.00  15-0.43365-0.43549 0.85873-0.86133 0.26879-0.26852
 -23   2  -5    1.91    9.47  13-0.44007-0.43051 0.86459-0.78973 0.23749-0.44122
 -23   5  -9   24.40   10.06  13-0.43908-0.43030 0.86372-0.67087 0.24245-0.60680
 -23   6 -10   33.87   10.81  14-0.43875-0.42964 0.86342-0.63090 0.24412-0.64859
 -22   0  14    6.53   11.94  14-0.43720-0.39615 0.86204-0.86401 0.25175 0.31388
 -22   1  -4   30.35    8.76  14-0.43897-0.39242 0.86362-0.82783 0.24301-0.40527
 -22   3  -7   77.42   10.31  14-0.43658-0.39542 0.86147-0.74660 0.25479-0.53825
 -21  -1  12   22.12   10.82  14-0.43810-0.35641 0.86285-0.90465 0.24732 0.23778
 -21   0  15   -3.25   11.93  14-0.43711-0.36467 0.86195-0.86425 0.25223 0.34892
 -21   3  -8  107.24    8.59  13-0.43998-0.35354 0.86451-0.75032 0.23794-0.56155
 -21   4  -9   12.87    9.17  14-0.43816-0.35575 0.86290-0.70941 0.24703-0.61107
 -21   5 -10   57.24    9.47  14-0.43770-0.35595 0.86248-0.66940 0.24932-0.65447
 -21   6 -11    2.41    9.62  13-0.43873-0.35599 0.86340-0.63151 0.24424-0.69100
 -21   7 -12   29.20   10.43  13-0.43941-0.35305 0.86401-0.59233 0.24082-0.72620
 -20  -2   9    4.99    9.75  14-0.43723-0.31851 0.86206-0.94254 0.25163 0.11075
 -20   0  16   28.26   11.49  14-0.43660-0.32037 0.86149-0.86318 0.25467 0.39181
 -20   2  -7   91.91    8.87  14-0.43823-0.31770 0.86296-0.78801 0.24671-0.53036
 -20   8 -13   -1.92   10.66  14-0.43834-0.31322 0.86306-0.54683 0.24613-0.77810
 -19  -2  11   32.13    9.96  14-0.43619-0.28125 0.86111-0.94208 0.25667 0.18702
 -19  -1  14    1.19    9.25  14-0.43847-0.28082 0.86318-0.90512 0.24550 0.32108
 -19   0  -4    5.19    9.38  14-0.43656-0.28346 0.86145-0.86511 0.25488-0.41740
 -19   1  -6  166.21    8.72  14-0.43816-0.28065 0.86290-0.82686 0.24702-0.49046
 -19   3  -9   38.27    8.45  13-0.43969-0.27703 0.86426-0.74994 0.23938-0.60315
 -19   4 -10   16.58    9.18  13-0.43870-0.27959 0.86338-0.70945 0.24438-0.64915
 -19   5 -11   19.39    9.23  14-0.43854-0.27932 0.86324-0.67001 0.24515-0.68983
 -19   6 -12   43.10    9.58  13-0.43943-0.27777 0.86403-0.63145 0.24069-0.72581
 -19   9 -14   33.36   10.57  14-0.43817-0.27912 0.86291-0.51268 0.24698-0.81337
 -18  -2  12  164.45   10.08  14-0.43673-0.24486 0.86160-0.94231 0.25406 0.23089
 -18  -1  15  307.27   11.12  14-0.43724-0.24456 0.86207-0.90288 0.25156 0.35472
 -18   0  17  111.58   10.39  13-0.43853-0.24131 0.86323-0.86418 0.24523 0.44218
 -18   2  -8   87.53    8.94  14-0.43854-0.24099 0.86324-0.78781 0.24514-0.56928
 -18   7 -13   94.91    9.90  14-0.43850-0.24107 0.86320-0.59132 0.24536-0.77114
 -18  10 -15    7.43   10.56  13-0.43910-0.24014 0.86373-0.47378 0.24238-0.84847
 -17  -2   0  396.00   13.42  15-0.43184-0.21224 0.85700-0.93830 0.27717-0.27729
 -17  -1  -3  110.86    9.67  14-0.43599-0.20719 0.86092-0.90315 0.25767-0.37929
 -17   1  -7   89.79    8.21  14-0.43895-0.20339 0.86361-0.82732 0.24310-0.52609
 -17   1  19   22.34   10.84  14-0.43890-0.20472 0.86356-0.82609 0.24338 0.52512
 -17   8 -14    8.88    9.86  13-0.43879-0.20313 0.86346-0.55202 0.24389-0.81005
 -17  10 -15   69.20    9.46  14-0.43721-0.20456 0.86204-0.47283 0.25171-0.85820
 -16  -3   9  248.52   10.03  14-0.43577-0.17019 0.86073-0.98035 0.25868 0.10474
 -16  -2  13   68.66    8.29  13-0.43932-0.16560 0.86393-0.94464 0.24128 0.28406
 -16  -1  16   45.17    8.68  14-0.43753-0.16651 0.86233-0.90327 0.25014 0.39564
 -16   0  18   36.19    9.22  14-0.43753-0.16647 0.86233-0.86325 0.25018 0.47648
 -16   3 -10  167.46    8.43  13-0.43981-0.16478 0.86436-0.74953 0.23879-0.64298
 -16   4 -11   92.97    8.78  13-0.43919-0.16488 0.86381-0.71003 0.24193-0.68630
 -16   5 -12   33.73    8.23  13-0.43969-0.16372 0.86425-0.67082 0.23942-0.72489
 -16   9 -15   34.68    7.07  13-0.44048-0.16299 0.86495-0.51498 0.23538-0.84269
 -16  11 -16    1.33    9.57  14-0.43923-0.15731 0.86385-0.42901 0.24171-0.89041
 -15  -3  10    2.22    9.16  15-0.43542-0.13323 0.86039-0.98087 0.26039 0.14412
 -15  -1  -4   12.03    8.01  13-0.43861-0.12926 0.86330-0.90527 0.24479-0.40715
 -15  -1  16   11.48    9.26  13-0.43957-0.12867 0.86415-0.90469 0.24002 0.40598
 -15   0  -6   -8.18    8.09  14-0.43906-0.12729 0.86370-0.86264 0.24255-0.49168
 -15   0  18   -3.82    9.52  14-0.43885-0.13570 0.86352-0.86611 0.24360 0.48078
 -15   2  -9   40.71    8.20  13-0.43954-0.12664 0.86412-0.78767 0.24016-0.60474
 -15   3 -10   -7.78    8.23  14-0.43817-0.12650 0.86291-0.74353 0.24697-0.65827
 -15   4 -11  149.78    8.41  14-0.43741-0.12960 0.86222-0.70806 0.25075-0.69571
 -15   5 -12  197.13    8.77  14-0.43801-0.12873 0.86277-0.66952 0.24777-0.73299
 -15   6 -13  141.68    9.11  13-0.43933-0.12679 0.86394-0.63131 0.24120-0.76642
 -15   9 -15   70.62    9.78  14-0.43883-0.12677 0.86350-0.51290 0.24372-0.85008
 -15  11 -16  171.37   10.57  14-0.43828-0.12795 0.86301-0.43401 0.24645-0.89265
 -14  -3  10  464.54    9.34  13-0.43871-0.09159 0.86339-0.98302 0.24430 0.15978
 -14  -2  14   86.80    8.85  13-0.43848-0.09036 0.86318-0.94304 0.24546 0.31982
 -14   0  -6  370.72   10.38  14-0.43663-0.09299 0.86151-0.86401 0.25454-0.49671
 -14   1  20   19.79    9.57  14-0.43773-0.09146 0.86251-0.82380 0.24919 0.55878
 -14   2  -9  382.27    9.05  14-0.43806-0.09154 0.86281-0.78730 0.24756-0.61136
 -14   2  21  131.65   10.61  13-0.43987-0.08905 0.86441-0.78613 0.23850 0.61092
 -14   6 -13   76.48    8.99  14-0.43823-0.09027 0.86296-0.63034 0.24670-0.77227
 -14   7 -14  108.70    6.58  13-0.44056-0.08829 0.86502-0.59354 0.23496-0.80107
 -14   9 -15  204.67    9.86  14-0.43786-0.09111 0.86263-0.51239 0.24853-0.85487
 -14  11 -16   91.68    9.49  14-0.43719-0.09144 0.86202-0.43293 0.25181-0.89758
 -14  13 -17   31.80   11.37  14-0.43872-0.08890 0.86340-0.35509 0.24425-0.93124
 -13  -2  -2  183.29   10.34  14-0.43750-0.05390 0.86231-0.94275 0.25028-0.33110
 -13  -2  14  806.32   10.17  13-0.43939-0.05321 0.86400-0.94396 0.24089 0.32495
 -13   1  -8  219.67    6.17  13-0.44048-0.05080 0.86495-0.82896 0.23538-0.55851
 -13   1  20   53.02   10.45  13-0.43863-0.05236 0.86332-0.82416 0.24469 0.56302
 -13   6 -13   30.01    7.82  14-0.43779-0.05371 0.86257-0.62949 0.24885-0.77624
 -13   7 -14  206.28    8.41  13-0.43965-0.05116 0.86422-0.59239 0.23962-0.80504
 -13  13 -17    7.06   10.44  13-0.43847-0.05173 0.86317-0.35481 0.24553-0.93410
 -12  -3  11  125.05    9.65  14-0.43720-0.01692 0.86203-0.98097 0.25178 0.19226
 -12  -2  -2  808.08   12.49  14-0.43634-0.01758 0.86125-0.94204 0.25596-0.33660
 -12  -2  14   59.33    8.19  13-0.44012-0.01410 0.86463-0.94408 0.23723 0.32817
 -12   1  -8  315.08    8.56  13-0.43956-0.01379 0.86415-0.82743 0.24003-0.56269
 -12   1  20   64.34    9.94  13-0.43877-0.01449 0.86344-0.82455 0.24403 0.56447
 -12   7 -14   47.78    8.58  13-0.43917-0.01338 0.86380-0.59130 0.24200-0.80725
 -12  10 -16    9.77    6.69  13-0.44081-0.01188 0.86523-0.47447 0.23369-0.88091
 -12  13 -17   41.01    9.77  14-0.43784-0.01433 0.86261-0.35482 0.24861-0.93537
 -11  -3  11  146.07    8.17  14-0.43716 0.02152 0.86200-0.98074 0.25196 0.19220
 -11  -2  -2  157.71   10.08  14-0.43633 0.02083 0.86124-0.94180 0.25601-0.33667
 -11  -2  14  150.02    8.16  13-0.43991 0.02328 0.86445-0.94406 0.23826 0.32728
 -11   1  -8   46.19    7.71  13-0.43962 0.02570 0.86419-0.82740 0.23975-0.56209
 -11   1  20   45.94    9.81  13-0.43881 0.02447 0.86348-0.82449 0.24380 0.56397
 -11   7 -14  190.43    8.56  13-0.43929 0.02417 0.86391-0.59161 0.24139-0.80666
 -11  10 -16  220.62    6.78  13-0.44097 0.02580 0.86537-0.47607 0.23285-0.87968
 -11  13 -17   19.90    9.70  14-0.43779 0.02403 0.86257-0.35406 0.24887-0.93540
 -10  -2  -2   36.07    9.72  14-0.43783 0.06127 0.86261-0.94254 0.24866-0.32911
 -10  -2  14   80.89    8.42  13-0.43933 0.06193 0.86394-0.94320 0.24121 0.32425
 -10   1  -8 1062.65    8.48  13-0.44081 0.06301 0.86523-0.82893 0.23369-0.55663
 -10   1  20   38.81    9.48  13-0.43840 0.06076 0.86312-0.82366 0.24583 0.56224
 -10   2  21   51.98    7.35  13-0.44048 0.06310 0.86495-0.78616 0.23538 0.61330
 -10   6 -13  213.58    8.06  14-0.43744 0.06003 0.86225-0.62933 0.25061-0.77555
 -10   7 -14   42.54    7.81  13-0.43968 0.06360 0.86425-0.59183 0.23943-0.80424
 -10  13 -17   28.13    9.54  14-0.43813 0.06234 0.86287-0.35419 0.24718-0.93353
  -9  -3  10  223.36    8.82  13-0.43852 0.09815 0.86322-0.98183 0.24526 0.15848
  -9  -2  14  343.85    9.09  14-0.43825 0.09745 0.86298-0.94201 0.24662 0.31855
  -9   0  -6    6.07    8.35  13-0.43834 0.09569 0.86306-0.86598 0.24616-0.49144
  -9   0  18    3.81    7.96  14-0.43880 0.09692 0.86347-0.86595 0.24385 0.48866
  -9   1  20   12.20    8.58  14-0.43778 0.09770 0.86255-0.82276 0.24894 0.55812
  -9   2  -9 1698.98   11.36  14-0.43826 0.09811 0.86299-0.78699 0.24654-0.60977
  -9   2  21  290.47    9.44  13-0.43962 0.09900 0.86419-0.78564 0.23976 0.60902
  -9   6 -13  150.76    8.54  14-0.43840 0.09898 0.86311-0.63055 0.24587-0.77042
  -9   7 -14   63.97    6.30  13-0.44089 0.10175 0.86530-0.59332 0.23327-0.79909
  -9   9 -15  188.13    8.71  14-0.43791 0.09837 0.86267-0.51214 0.24828-0.85378
  -9  11 -16   33.40    8.18  14-0.43745 0.09845 0.86226-0.43309 0.25055-0.89642
  -9  13 -17  191.96    9.72  13-0.43893 0.10002 0.86359-0.35523 0.24320-0.92980
  -8  -3   9  869.12   10.29  13-0.43901 0.13619 0.86366-0.98256 0.24281 0.12077
  -8  -1  -4  284.96   10.40  14-0.43895 0.13705 0.86360-0.90458 0.24312-0.40378
  -8  -1  16  671.39    9.33  13-0.43905 0.13575 0.86369-0.90358 0.24262 0.40377
  -8   0  -6 1095.64   11.44  13-0.43970 0.13747 0.86427-0.86620 0.23932-0.48070
  -8   0  18  331.31    9.07  13-0.43874 0.13594 0.86342-0.86369 0.24415 0.48306
  -8   2  -9  365.17    6.94  13-0.44031 0.13839 0.86480-0.78887 0.23622-0.59922
  -8   2  21   23.59    9.56  13-0.43859 0.13598 0.86328-0.78414 0.24491 0.60361
  -8   3 -10 2106.28   11.68  14-0.43810 0.13580 0.86284-0.74736 0.24735-0.65088
  -8   3  22   -7.46    9.23  14-0.43923 0.12948 0.86385-0.74801 0.24171 0.64921
  -8   4 -11  154.34    8.22  14-0.43768 0.13558 0.86247-0.70806 0.24941-0.69352
  -8   4  23   -2.34    9.57  14-0.43864 0.13561 0.86333-0.70733 0.24466 0.69213
  -8   5 -12  191.82    8.69  14-0.43837 0.13640 0.86309-0.66969 0.24600-0.73051
  -8   6 -13  140.38    8.25  13-0.43986 0.13856 0.86440-0.63158 0.23855-0.76332
  -8   9 -15  139.87    8.66  13-0.43910 0.13717 0.86374-0.51309 0.24237-0.84774
  -8  11 -16  133.89    8.89  14-0.43860 0.13756 0.86329-0.43382 0.24488-0.89082
  -8  13 -17   78.35    6.94  13-0.44015 0.13832 0.86466-0.35698 0.23707-0.92414
  -7  -3   4 1041.50   15.53  14-0.43664 0.17228 0.86153-0.98011 0.25448-0.09273
  -7  -3   7  145.02    9.12  13-0.43957 0.17542 0.86415-0.98280 0.23998 0.04251
  -7  -3   8  488.61    9.53  14-0.43813 0.17325 0.86287-0.98115 0.24720 0.07565
  -7  -2  13  305.20    8.41  13-0.43876 0.17388 0.86344-0.94279 0.24405 0.28069
  -7   3 -10 1210.57    8.46  13-0.44065 0.17638 0.86509-0.74981 0.23453-0.63801
  -7   3  22   11.82   10.07  14-0.43822 0.17374 0.86295-0.74448 0.24674 0.64271
  -7   4 -11  155.86    8.12  13-0.43991 0.17618 0.86445-0.70991 0.23830-0.68223
  -7   4  23    6.25   10.44  14-0.43853 0.17416 0.86323-0.70557 0.24519 0.68511
  -7   5 -12  124.94    6.52  13-0.44031 0.17641 0.86480-0.67093 0.23622-0.72058
  -7   9 -15  231.42    6.59  13-0.44089 0.17690 0.86530-0.51478 0.23327-0.83922
  -7  11 -16  280.98    6.99  13-0.44023 0.17636 0.86473-0.43565 0.23665-0.88298
  -7  14 -17   61.32    9.34  14-0.43831 0.17608 0.86303-0.31516 0.24632-0.93281
  -6  -2  12  348.69    6.54  13-0.44040 0.21287 0.86487-0.94361 0.23580 0.24889
  -6  -1  15  220.52    8.21  13-0.43997 0.21231 0.86450-0.90393 0.23799 0.36781
  -6   0  17  277.56    6.65  13-0.44048 0.21283 0.86495-0.86498 0.23538 0.45150
  -6   1  -7   27.32    6.67  13-0.44015 0.21425 0.86466-0.82806 0.23707-0.51795
  -6   1  19  177.72    9.20  13-0.43868 0.21148 0.86336-0.82410 0.24445 0.52289
  -6   8 -14   15.77    8.80  14-0.43900 0.21328 0.86365-0.55048 0.24285-0.80740
  -6  10 -15   38.99    8.00  14-0.43749 0.21242 0.86229-0.47171 0.25037-0.85604
  -6  12 -16  225.41    9.12  14-0.43784 0.21219 0.86261-0.39353 0.24862-0.89472
  -6  14 -17   -0.57    6.85  13-0.44015 0.22187 0.86466-0.30992 0.23707-0.92470
  -6  15 -17  455.31    9.35  14-0.43720 0.21111 0.86203-0.27483 0.25176-0.93821
  -5  -2  11 1526.16    9.46  13-0.44048 0.25104 0.86495-0.94381 0.23538 0.20903
  -5   0  17   -6.03    7.79  14-0.43813 0.24354 0.86287-0.86345 0.24718 0.43851
  -5   2  -8  214.36    9.17  13-0.43943 0.25122 0.86402-0.78750 0.24072-0.56257
  -5   2  20  462.41    9.53  13-0.43889 0.24940 0.86355-0.78480 0.24343 0.56476
  -5   3  21  144.89    6.96  13-0.44048 0.25120 0.86495-0.74691 0.23538 0.61328
  -5   7 -13  389.31    8.88  13-0.43910 0.25093 0.86374-0.59119 0.24236-0.76663
  -5  10 -15  357.88    6.84  13-0.43998 0.25173 0.86451-0.47414 0.23791-0.84386
  -5  12 -16   12.33    6.25  13-0.44023 0.25277 0.86473-0.39427 0.23665-0.88371
  -5  15 -17   12.33    8.94  14-0.43900 0.25238 0.86365-0.27642 0.24287-0.92744
  -4  -2  10  701.08   10.34  13-0.43915 0.28770 0.86378-0.94258 0.24209 0.16159
  -4  -1  14 1233.05   10.01  14-0.43814 0.28634 0.86288-0.90208 0.24717 0.31829
  -4   0  16 1585.51    8.72  13-0.43998 0.28801 0.86451-0.86437 0.23791 0.40846
  -4   1  -6 6892.52   20.32  13-0.43898 0.28798 0.86363-0.82590 0.24298-0.48400
  -4   1  18 1017.16    9.83  13-0.43906 0.28718 0.86370-0.82420 0.24258 0.48487
  -4   3  21  250.66    9.48  14-0.43799 0.28711 0.86275-0.74405 0.24788 0.60072
  -4   4 -10  819.59    9.67  13-0.43952 0.28882 0.86411-0.70897 0.24025-0.64319
  -4   4  22   34.34    9.57  13-0.43880 0.28809 0.86347-0.70533 0.24387 0.64535
  -4   5 -11  372.78    8.39  13-0.43953 0.28913 0.86411-0.66988 0.24022-0.68374
  -4   5  23   36.77   10.21  13-0.43874 0.28796 0.86342-0.66587 0.24415 0.68611
  -4   6 -12  234.54    6.38  13-0.44065 0.29018 0.86509-0.63209 0.23453-0.71846
  -4   6  24  103.05   10.90  14-0.43822 0.28758 0.86295-0.62588 0.24674 0.72300
  -4   9 -14   63.30    8.44  14-0.43869 0.28910 0.86337-0.51243 0.24443-0.80866
  -4  11 -15  433.94    8.51  14-0.43782 0.28777 0.86260-0.43280 0.24871-0.85441
  -4  13 -16  250.41    9.13  13-0.43892 0.28928 0.86358-0.35458 0.24327-0.88925
  -4  16 -17    7.99    9.00  13-0.43948 0.29040 0.86407-0.23613 0.24044-0.92740
  -4  17 -17   34.07    9.49  14-0.43745 0.28900 0.86226-0.19572 0.25055-0.93719
  -3  -2   5 2804.78   17.32  13-0.44001 0.32701 0.86454-0.94307 0.23777-0.03597
  -3  -2   6 1192.26   11.17  13-0.44048 0.32747 0.86495-0.94351 0.23538 0.00659
  -3  -2   7  534.33   11.10  13-0.43971 0.32661 0.86427-0.94280 0.23930 0.04286
  -3  -2   8  190.11    9.90  14-0.43818 0.32482 0.86292-0.94136 0.24693 0.07514
  -3  -1  13   75.41    8.48  14-0.43839 0.32449 0.86311-0.90207 0.24588 0.27900
  -3   2  -7  542.09   10.52  13-0.43923 0.32617 0.86385-0.78706 0.24171-0.52281
  -3   2  19  132.08    8.90  13-0.43889 0.32592 0.86355-0.78456 0.24339 0.52433
[truncated: 2,244,397 more chars]
