# Supplementary material
Source: MDPI journal article supplement (https://www.mdpi.com/2304-6740/7/10/117)
Supplement: s1 [file s1 › inorganics-584457-Supplementary Materials/CIF and CIFcheck files/K(18c6)Co4.cif]

####################################################################### 
# 
# This file contains crystal structure data downloaded from the 
# Cambridge Structural Database (CSD) hosted by the Cambridge 
# Crystallographic Data Centre (CCDC).
# 
# Full information about CCDC data access policies and citation 
# guidelines are available at http://www.ccdc.cam.ac.uk/access/V1 
# 
# Audit and citation data items may have been added by the CCDC. 
# Please retain this information to preserve the provenance of 
# this file and to allow appropriate attribution of the data. 
# 
#######################################################################

data_k(18c6)co8
_database_code_depnum_ccdc_archive 'CCDC 1918205'
loop_
_audit_author_name
_audit_author_address
'Igor Mueller'
;Philipps University Marburg
Germany
;
_audit_update_record             
;
2019-05-23 deposited with the CCDC.	2019-08-14 downloaded from the CCDC.
;
_audit_creation_date             2019-05-23
_audit_creation_method           
;
Olex2 1.2-alpha
(compiled 2018.07.26 svn.r3523 for OlexSys, GUI svn.r5532)
;
_shelx_SHELXL_version_number     2018/3
_audit_contact_author_address    Philipps-University
_audit_contact_author_email      gunnar.werncke@chemie.uni-marburg.de
_audit_contact_author_name       C.
_audit_contact_author_phone      +4964212825637
_publ_contact_author_id_orcid    299638391
_publ_section_references         
;
Dolomanov, O.V., Bourhis, L.J., Gildea, R.J, Howard, J.A.K. & Puschmann, H.
 (2009), J. Appl. Cryst. 42, 339-341.

Sheldrick, G.M. (2015). Acta Cryst. C71, 3-8.
;
_chemical_name_common            ?
_chemical_name_systematic        ?
_chemical_formula_moiety         'C22 H44 Co N4 Si4, 2(C10 H20 K0.5 O4)'
_chemical_formula_sum            'C42 H84 Co K N4 O8 Si4'
_chemical_formula_weight         983.52
_chemical_melting_point          ?
loop_
_atom_type_symbol
_atom_type_description
_atom_type_scat_dispersion_real
_atom_type_scat_dispersion_imag
_atom_type_scat_source
C C 0.0033 0.0016 'International Tables Vol C Tables 4.2.6.8 and 6.1.1.4'
H H 0.0000 0.0000 'International Tables Vol C Tables 4.2.6.8 and 6.1.1.4'
Co Co 0.3494 0.9721 'International Tables Vol C Tables 4.2.6.8 and 6.1.1.4'
K K 0.2009 0.2494 'International Tables Vol C Tables 4.2.6.8 and 6.1.1.4'
N N 0.0061 0.0033 'International Tables Vol C Tables 4.2.6.8 and 6.1.1.4'
O O 0.0106 0.0060 'International Tables Vol C Tables 4.2.6.8 and 6.1.1.4'
Si Si 0.0817 0.0704 'International Tables Vol C Tables 4.2.6.8 and 6.1.1.4'

_shelx_space_group_comment       
;
The symmetry employed for this shelxl refinement is uniquely defined
by the following loop, which should always be used as a source of
symmetry information in preference to the above space-group names.
They are only intended as comments.
;
_space_group_crystal_system      triclinic
_space_group_IT_number           2
_space_group_name_H-M_alt        'P -1'
_space_group_name_Hall           '-P 1'
loop_
_space_group_symop_operation_xyz
'x, y, z'
'-x, -y, -z'

_cell_length_a                   10.8097(5)
_cell_length_b                   13.2648(6)
_cell_length_c                   19.9051(10)
_cell_angle_alpha                77.712(2)
_cell_angle_beta                 80.199(2)
_cell_angle_gamma                83.606(2)
_cell_volume                     2739.7(2)
_cell_formula_units_Z            2
_cell_measurement_reflns_used    9838
_cell_measurement_temperature    100.0
_cell_measurement_theta_max      26.7563
_cell_measurement_theta_min      2.3772
_shelx_estimated_absorpt_T_max   0.964
_shelx_estimated_absorpt_T_min   0.889
_exptl_absorpt_coefficient_mu    0.524
_exptl_absorpt_correction_T_max  0.7456
_exptl_absorpt_correction_T_min  0.7042
_exptl_absorpt_correction_type   multi-scan
_exptl_absorpt_process_details   
;
SADABS 2016/2: Krause, L., Herbst-Irmer, R., Sheldrick G.M. & Stalke D., 
 J. Appl. Cryst. 48 (2015) 3-10
;
_exptl_crystal_colour            'clear dark green'
_exptl_crystal_colour_lustre     clear
_exptl_crystal_colour_modifier   dark
_exptl_crystal_colour_primary    green
_exptl_crystal_density_diffrn    1.192
_exptl_crystal_density_meas      ?
_exptl_crystal_density_method    ?
_exptl_crystal_description       plate
_exptl_crystal_F_000             1060
_exptl_crystal_size_max          0.23
_exptl_crystal_size_mid          0.14
_exptl_crystal_size_min          0.07
_exptl_transmission_factor_max   ?
_exptl_transmission_factor_min   ?
_diffrn_reflns_av_R_equivalents  0.0853
_diffrn_reflns_av_unetI/netI     0.0565
_diffrn_reflns_Laue_measured_fraction_full 0.999
_diffrn_reflns_Laue_measured_fraction_max 0.996
_diffrn_reflns_limit_h_max       14
_diffrn_reflns_limit_h_min       -14
_diffrn_reflns_limit_k_max       17
_diffrn_reflns_limit_k_min       -16
_diffrn_reflns_limit_l_max       25
_diffrn_reflns_limit_l_min       -25
_diffrn_reflns_number            89930
_diffrn_reflns_point_group_measured_fraction_full 0.999
_diffrn_reflns_point_group_measured_fraction_max 0.996
_diffrn_reflns_theta_full        25.242
_diffrn_reflns_theta_max         27.529
_diffrn_reflns_theta_min         2.119
_diffrn_ambient_temperature      100.0
_diffrn_detector                 'Bruker APEX2 area detector'
_diffrn_detector_area_resol_mean 7.9
_diffrn_detector_type            'CCD area detector'
_diffrn_measured_fraction_theta_full 0.999
_diffrn_measured_fraction_theta_max 0.996
_diffrn_measurement_device       'three-circle diffractometer'
_diffrn_measurement_device_type  'Bruker D8 QUEST'
_diffrn_measurement_method       '\w and \f scans'
_diffrn_radiation_monochromator  'mirror optics'
_diffrn_radiation_probe          x-ray
_diffrn_radiation_type           MoK\a
_diffrn_radiation_wavelength     0.71073
_diffrn_source                   'microfocus sealed X-ray tube'
_diffrn_source_type              'Incoatec I\ms'
_reflns_Friedel_coverage         0.000
_reflns_Friedel_fraction_full    .
_reflns_Friedel_fraction_max     .
_reflns_number_gt                9015
_reflns_number_total             12549
_reflns_special_details          
;
 Reflections were merged by SHELXL according to the crystal
 class for the calculation of statistics and refinement.
 
 _reflns_Friedel_fraction is defined as the number of unique
 Friedel pairs measured divided by the number that would be
 possible theoretically, ignoring centric projections and
 systematic absences.
;
_reflns_threshold_expression     'I > 2\s(I)'
_computing_cell_refinement       ?
_computing_data_collection       ?
_computing_data_reduction        ?
_computing_molecular_graphics    'Olex2 (Dolomanov et al., 2009)'
_computing_publication_material  'Olex2 (Dolomanov et al., 2009)'
_computing_structure_refinement  'ShelXL (Sheldrick, 2015)'
_computing_structure_solution    ?
_refine_diff_density_max         0.294
_refine_diff_density_min         -0.493
_refine_diff_density_rms         0.062
_refine_ls_extinction_coef       .
_refine_ls_extinction_method     none
_refine_ls_goodness_of_fit_ref   1.017
_refine_ls_hydrogen_treatment    constr
_refine_ls_matrix_type           full
_refine_ls_number_parameters     584
_refine_ls_number_reflns         12549
_refine_ls_number_restraints     57
_refine_ls_R_factor_all          0.0779
_refine_ls_R_factor_gt           0.0420
_refine_ls_restrained_S_all      1.015
_refine_ls_shift/su_max          0.001
_refine_ls_shift/su_mean         0.000
_refine_ls_structure_factor_coef Fsqd
_refine_ls_weighting_details     
'w=1/[\s^2^(Fo^2^)+(0.0280P)^2^+1.5905P] where P=(Fo^2^+2Fc^2^)/3'
_refine_ls_weighting_scheme      calc
_refine_ls_wR_factor_gt          0.0738
_refine_ls_wR_factor_ref         0.0830
_refine_special_details          ?
_olex2_refinement_description    
;
1. Fixed Uiso
 At 1.2 times of:
  All C(H) groups, All C(H,H) groups, All C(H,H,H,H) groups
 At 1.5 times of:
  All C(H,H,H) groups
2. Rigid body (RIGU) restrains
 O100, C101, C102, C103, C104, O200, C201, C204
 with sigma for 1-2 distances of 0.004 and sigma for 1-3 distances of 0.004
3. Others
 Sof(H10E)=Sof(H10F)=Sof(H10I)=Sof(H10J)=Sof(O200)=Sof(C201)=Sof(H20A)=
 Sof(H20B)=Sof(C204)=Sof(H20C)=Sof(H20D)=1-FVAR(1)
 Sof(O100)=Sof(C101)=Sof(H10A)=Sof(H10B)=Sof(H10C)=Sof(H10D)=Sof(H10G)=
 Sof(H10H)=Sof(C104)=Sof(H10K)=Sof(H10L)=FVAR(1)
4.a Secondary CH2 refined with riding coordinates:
 C2C(H2CA,H2CB), C3C(H3CA,H3CB), C5C(H5CA,H5CB), C6C(H6CA,H6CB), C8C(H8CA,
 H8CB), C16C(H16C,H16D), C2K(H2KA,H2KB), C3K(H3KA,H3KB), C5K(H5KA,H5KB),
 C6K(H6KA,H6KB), C8K(H8KA,H8KB), C16K(H16A,H16B), C301(H30A,H30B), C302(H30C,
 H30D), C303(H30E,H30F), C304(H30G,H30H), C101(H10A,H10B), C102(H10C,H10D),
 C102(H10E,H10F), C103(H10G,H10H), C103(H10I,H10J), C104(H10K,H10L), C201(H20A,
 H20B), C204(H20C,H20D)
4.b Aromatic/amide H refined with riding coordinates:
 C1(H1), C2(H2), C3(H3), C4(H4), C7(H7), C8(H8), C9(H9), C10(H10)
4.c Idealised Me refined as rotating group:
 C111(H11A,H11B,H11C), C112(H11D,H11E,H11F), C113(H11G,H11H,H11I), C121(H12A,
 H12B,H12C), C122(H12D,H12E,H12F), C123(H12G,H12H,H12I), C211(H21A,H21B,H21C),
 C212(H21D,H21E,H21F), C213(H21G,H21H,H21I), C221(H22A,H22B,H22C), C222(H22D,
 H22E,H22F), C223(H22G,H22H,H22I)
;
_atom_sites_solution_hydrogens   geom
_atom_sites_solution_primary     ?
_atom_sites_solution_secondary   ?
loop_
_atom_site_label
_atom_site_type_symbol
_atom_site_fract_x
_atom_site_fract_y
_atom_site_fract_z
_atom_site_U_iso_or_equiv
_atom_site_adp_type
_atom_site_occupancy
_atom_site_site_symmetry_order
_atom_site_calc_flag
_atom_site_refinement_flags_posn
_atom_site_refinement_flags_adp
_atom_site_refinement_flags_occupancy
_atom_site_disorder_assembly
_atom_site_disorder_group
Co1 Co 0.49321(2) 0.54946(2) 0.76110(2) 0.01471(7) Uani 1 1 d . . . . .
K1 K 0.000000 1.000000 0.500000 0.02129(14) Uani 1 2 d S T P . .
K2 K 0.000000 1.000000 1.000000 0.02292(14) Uani 1 2 d S T P . .
N1 N 0.39299(15) 0.57373(12) 0.68277(8) 0.0176(4) Uani 1 1 d . . . . .
N2 N 0.32253(15) 0.52501(12) 0.81554(8) 0.0169(3) Uani 1 1 d . . . . .
C1 C 0.43870(19) 0.58602(15) 0.61380(10) 0.0209(4) Uani 1 1 d . . . . .
H1 H 0.525535 0.596663 0.599746 0.025 Uiso 1 1 calc R . . . .
C2 C 0.3681(2) 0.58410(16) 0.56320(11) 0.0254(5) Uani 1 1 d . . . . .
H2 H 0.405154 0.593426 0.515678 0.030 Uiso 1 1 calc R . . . .
C3 C 0.2396(2) 0.56800(17) 0.58319(11) 0.0272(5) Uani 1 1 d . . . . .
H3 H 0.187746 0.567334 0.549283 0.033 Uiso 1 1 calc R . . . .
C4 C 0.19036(19) 0.55327(16) 0.65242(11) 0.0231(5) Uani 1 1 d . . . . .
H4 H 0.103880 0.541419 0.666633 0.028 Uiso 1 1 calc R . . . .
C5 C 0.26704(18) 0.55555(15) 0.70281(10) 0.0179(4) Uani 1 1 d . . . . .
C6 C 0.22633(18) 0.53639(15) 0.77638(10) 0.0179(4) Uani 1 1 d . . . . .
C7 C 0.10026(19) 0.53218(16) 0.80837(11) 0.0249(5) Uani 1 1 d . . . . .
H7 H 0.035078 0.539369 0.780752 0.030 Uiso 1 1 calc R . . . .
C8 C 0.0711(2) 0.51777(17) 0.87907(12) 0.0284(5) Uani 1 1 d . . . . .
H8 H -0.013897 0.514157 0.901046 0.034 Uiso 1 1 calc R . . . .
C9 C 0.1696(2) 0.50833(16) 0.91896(11) 0.0252(5) Uani 1 1 d . . . . .
H9 H 0.151896 0.499240 0.968196 0.030 Uiso 1 1 calc R . . . .
C10 C 0.29016(19) 0.51249(15) 0.88558(10) 0.0203(4) Uani 1 1 d . . . . .
H10 H 0.355632 0.506270 0.912901 0.024 Uiso 1 1 calc R . . . .
N11 N 0.61457(15) 0.42947(12) 0.74235(8) 0.0170(3) Uani 1 1 d . . . . .
Si11 Si 0.55056(5) 0.31445(4) 0.75386(3) 0.02007(13) Uani 1 1 d . . . . .
C111 C 0.4572(2) 0.30651(18) 0.68366(13) 0.0358(6) Uani 1 1 d . . . . .
H11A H 0.430261 0.236343 0.690922 0.054 Uiso 1 1 calc GR . . . .
H11B H 0.509702 0.322963 0.638107 0.054 Uiso 1 1 calc GR . . . .
H11C H 0.382926 0.356093 0.685432 0.054 Uiso 1 1 calc GR . . . .
C112 C 0.4437(2) 0.28059(17) 0.83863(13) 0.0365(6) Uani 1 1 d . . . . .
H11D H 0.428331 0.207154 0.847508 0.055 Uiso 1 1 calc GR . . . .
H11E H 0.363555 0.322789 0.836444 0.055 Uiso 1 1 calc GR . . . .
H11F H 0.483355 0.294105 0.876255 0.055 Uiso 1 1 calc GR . . . .
C113 C 0.6715(2) 0.20049(16) 0.75441(11) 0.0257(5) Uani 1 1 d . . . . .
H11G H 0.628995 0.136900 0.760589 0.039 Uiso 1 1 calc GR . . . .
H11H H 0.719434 0.195410 0.792739 0.039 Uiso 1 1 calc GR . . . .
H11I H 0.728899 0.209891 0.710175 0.039 Uiso 1 1 calc GR . . . .
Si12 Si 0.75659(5) 0.45298(4) 0.69316(3) 0.01815(12) Uani 1 1 d . . . . .
C121 C 0.7729(2) 0.42132(17) 0.60383(11) 0.0269(5) Uani 1 1 d . . . . .
H12A H 0.855806 0.438479 0.577869 0.040 Uiso 1 1 calc GR . . . .
H12B H 0.707074 0.461709 0.578939 0.040 Uiso 1 1 calc GR . . . .
H12C H 0.764152 0.347335 0.608315 0.040 Uiso 1 1 calc GR . . . .
C122 C 0.89346(19) 0.37826(17) 0.73351(12) 0.0289(5) Uani 1 1 d . . . . .
H12D H 0.972495 0.397768 0.703698 0.043 Uiso 1 1 calc GR . . . .
H12E H 0.886604 0.303930 0.738348 0.043 Uiso 1 1 calc GR . . . .
H12F H 0.892398 0.394255 0.779469 0.043 Uiso 1 1 calc GR . . . .
C123 C 0.7888(2) 0.59277(16) 0.67611(11) 0.0258(5) Uani 1 1 d . . . . .
H12G H 0.870609 0.602702 0.646633 0.039 Uiso 1 1 calc GR . . . .
H12H H 0.789923 0.613683 0.720333 0.039 Uiso 1 1 calc GR . . . .
H12I H 0.722642 0.635044 0.652444 0.039 Uiso 1 1 calc GR . . . .
N21 N 0.54487(14) 0.66736(12) 0.79606(8) 0.0166(3) Uani 1 1 d . . . . .
Si21 Si 0.62107(5) 0.63976(4) 0.86614(3) 0.01770(12) Uani 1 1 d . . . . .
C211 C 0.6660(2) 0.49822(17) 0.89234(11) 0.0282(5) Uani 1 1 d . . . . .
H21A H 0.702934 0.485448 0.935343 0.042 Uiso 1 1 calc GR . . . .
H21B H 0.727654 0.475407 0.855364 0.042 Uiso 1 1 calc GR . . . .
H21C H 0.590929 0.459651 0.900040 0.042 Uiso 1 1 calc GR . . . .
C212 C 0.77365(19) 0.70345(18) 0.85143(11) 0.0280(5) Uani 1 1 d . . . . .
H21D H 0.821501 0.673261 0.889505 0.042 Uiso 1 1 calc GR . . . .
H21E H 0.755487 0.777875 0.849925 0.042 Uiso 1 1 calc GR . . . .
H21F H 0.823197 0.692279 0.807228 0.042 Uiso 1 1 calc GR . . . .
C213 C 0.5253(2) 0.67768(17) 0.94673(11) 0.0259(5) Uani 1 1 d . . . . .
H21G H 0.574254 0.658259 0.985305 0.039 Uiso 1 1 calc GR . . . .
H21H H 0.447584 0.641829 0.958832 0.039 Uiso 1 1 calc GR . . . .
H21I H 0.504160 0.752643 0.937904 0.039 Uiso 1 1 calc GR . . . .
Si22 Si 0.47349(5) 0.78451(4) 0.76469(3) 0.01809(12) Uani 1 1 d . . . . .
C221 C 0.5102(2) 0.89451(16) 0.80323(12) 0.0285(5) Uani 1 1 d . . . . .
H22A H 0.483653 0.960710 0.774867 0.043 Uiso 1 1 calc GR . . . .
H22B H 0.601019 0.891052 0.804005 0.043 Uiso 1 1 calc GR . . . .
H22C H 0.465018 0.888711 0.850783 0.043 Uiso 1 1 calc GR . . . .
C222 C 0.29705(19) 0.78795(17) 0.78185(11) 0.0261(5) Uani 1 1 d . . . . .
H22D H 0.261448 0.857870 0.764109 0.039 Uiso 1 1 calc GR . . . .
H22E H 0.268817 0.769005 0.832029 0.039 Uiso 1 1 calc GR . . . .
H22F H 0.268755 0.738770 0.758374 0.039 Uiso 1 1 calc GR . . . .
C223 C 0.5177(2) 0.82523(16) 0.66766(11) 0.0238(5) Uani 1 1 d . . . . .
H22G H 0.474295 0.892834 0.651735 0.036 Uiso 1 1 calc GR . . . .
H22H H 0.492776 0.773973 0.644624 0.036 Uiso 1 1 calc GR . . . .
H22I H 0.608915 0.830067 0.656146 0.036 Uiso 1 1 calc GR . . . .
O1C O -0.01112(13) 0.90135(10) 0.63804(7) 0.0229(3) Uani 1 1 d . . . . .
C2C C -0.1358(2) 0.88687(17) 0.67346(11) 0.0284(5) Uani 1 1 d . . . . .
H2CA H -0.134543 0.863432 0.724023 0.034 Uiso 1 1 calc R . . . .
H2CB H -0.172104 0.833341 0.656571 0.034 Uiso 1 1 calc R . . . .
C3C C -0.2141(2) 0.98745(17) 0.66007(11) 0.0270(5) Uani 1 1 d . . . . .
H3CA H -0.297425 0.981637 0.689698 0.032 Uiso 1 1 calc R . . . .
H3CB H -0.172225 1.042856 0.671644 0.032 Uiso 1 1 calc R . . . .
O4C O -0.22958(13) 1.01240(11) 0.58877(7) 0.0233(3) Uani 1 1 d . . . . .
C5C C -0.3096(2) 1.10469(17) 0.57363(12) 0.0290(5) Uani 1 1 d . . . . .
H5CA H -0.274054 1.163277 0.585333 0.035 Uiso 1 1 calc R . . . .
H5CB H -0.394038 1.095890 0.601653 0.035 Uiso 1 1 calc R . . . .
C6C C -0.31981(19) 1.12625(18) 0.49814(12) 0.0294(5) Uani 1 1 d . . . . .
H6CA H -0.351164 1.066199 0.485877 0.035 Uiso 1 1 calc R . . . .
H6CB H -0.379566 1.187370 0.486861 0.035 Uiso 1 1 calc R . . . .
O7C O -0.19796(13) 1.14534(11) 0.45996(7) 0.0246(3) Uani 1 1 d . . . . .
C8C C -0.1987(2) 1.16961(17) 0.38678(11) 0.0266(5) Uani 1 1 d . . . . .
H8CA H -0.258208 1.230675 0.374816 0.032 Uiso 1 1 calc R . . . .
H8CB H -0.226285 1.110565 0.371435 0.032 Uiso 1 1 calc R . . . .
C16C C 0.06859(19) 0.80797(16) 0.64890(11) 0.0262(5) Uani 1 1 d . . . . .
H16C H 0.037213 0.754411 0.629659 0.031 Uiso 1 1 calc R . . . .
H16D H 0.069083 0.781860 0.699300 0.031 Uiso 1 1 calc R . . . .
O1K O 0.03812(14) 0.78767(11) 1.02184(8) 0.0264(3) Uani 1 1 d . . . . .
C2K C -0.0392(2) 0.73993(17) 0.98846(13) 0.0313(5) Uani 1 1 d . . . . .
H2KA H -0.029470 0.663780 1.003721 0.038 Uiso 1 1 calc R . . . .
H2KB H -0.014180 0.757138 0.937388 0.038 Uiso 1 1 calc R . . . .
C3K C -0.1729(2) 0.77915(17) 1.00772(12) 0.0310(5) Uani 1 1 d . . . . .
H3KA H -0.230207 0.740265 0.990780 0.037 Uiso 1 1 calc R . . . .
H3KB H -0.194577 0.769849 1.058913 0.037 Uiso 1 1 calc R . . . .
O4K O -0.18611(13) 0.88626(11) 0.97654(8) 0.0280(3) Uani 1 1 d . . . . .
C5K C -0.3120(2) 0.93006(18) 0.98721(13) 0.0337(6) Uani 1 1 d . . . . .
H5KA H -0.341759 0.925558 1.037549 0.040 Uiso 1 1 calc R . . . .
H5KB H -0.367828 0.891897 0.968665 0.040 Uiso 1 1 calc R . . . .
C6K C -0.3151(2) 1.04054(18) 0.95042(13) 0.0323(5) Uani 1 1 d . . . . .
H6KA H -0.277933 1.045352 0.900931 0.039 Uiso 1 1 calc R . . . .
H6KB H -0.403238 1.070998 0.952533 0.039 Uiso 1 1 calc R . . . .
O7K O -0.24515(13) 1.09516(12) 0.98326(8) 0.0280(3) Uani 1 1 d . . . . .
C8K C -0.2385(2) 1.20084(17) 0.94900(12) 0.0317(5) Uani 1 1 d . . . . .
H8KA H -0.324422 1.235505 0.948290 0.038 Uiso 1 1 calc R . . . .
H8KB H -0.196345 1.205182 0.900369 0.038 Uiso 1 1 calc R . . . .
C16K C 0.1657(2) 0.74725(18) 1.01246(14) 0.0360(6) Uani 1 1 d . . . . .
H16A H 0.200704 0.760258 0.962369 0.043 Uiso 1 1 calc R . . . .
H16B H 0.171450 0.671587 1.030437 0.043 Uiso 1 1 calc R . . . .
O300 O -0.11521(18) 0.84420(15) 0.47122(13) 0.0649(6) Uani 1 1 d . . . . .
C301 C -0.2434(3) 0.8341(2) 0.47087(18) 0.0619(9) Uani 1 1 d . . . . .
H30A H -0.271776 0.878914 0.428900 0.074 Uiso 1 1 calc R . . . .
H30B H -0.295417 0.854576 0.512518 0.074 Uiso 1 1 calc R . . . .
C302 C -0.2556(3) 0.7233(2) 0.47097(18) 0.0642(9) Uani 1 1 d . . . . .
H30C H -0.288521 0.686095 0.518154 0.077 Uiso 1 1 calc R . . . .
H30D H -0.312851 0.716880 0.438469 0.077 Uiso 1 1 calc R . . . .
C303 C -0.1273(3) 0.6820(3) 0.4482(2) 0.0929(14) Uani 1 1 d . . . . .
H30E H -0.107883 0.614210 0.478212 0.112 Uiso 1 1 calc R . . . .
H30F H -0.118514 0.672342 0.399617 0.112 Uiso 1 1 calc R . . . .
C304 C -0.0422(3) 0.7563(2) 0.45347(19) 0.0617(9) Uani 1 1 d . . . . .
H30G H 0.011313 0.725792 0.489548 0.074 Uiso 1 1 calc R . . . .
H30H H 0.013202 0.775864 0.408508 0.074 Uiso 1 1 calc R . . . .
O100 O 0.0353(9) 1.0514(5) 0.8587(3) 0.0557(16) Uani 0.698(18) 1 d . U . A 1
C101 C 0.1264(9) 1.1256(7) 0.8279(3) 0.060(2) Uani 0.698(18) 1 d . U . A 1
H10A H 0.197907 1.114417 0.854488 0.072 Uiso 0.698(18) 1 calc R . . A 1
H10B H 0.087469 1.196901 0.827592 0.072 Uiso 0.698(18) 1 calc R . . A 1
C102 C 0.1705(3) 1.1099(3) 0.75517(16) 0.0617(8) Uani 1 1 d . U . . .
H10C H 0.243106 1.057513 0.752919 0.074 Uiso 0.698(18) 1 calc R . . A 1
H10D H 0.193223 1.175392 0.723111 0.074 Uiso 0.698(18) 1 calc R . . A 1
H10E H 0.167526 1.186372 0.742453 0.074 Uiso 0.302(18) 1 calc R . . A 2
H10F H 0.246588 1.081146 0.728011 0.074 Uiso 0.302(18) 1 calc R . . A 2
C103 C 0.0544(3) 1.0720(2) 0.73999(16) 0.0521(7) Uani 1 1 d . U . . .
H10G H 0.074698 1.033686 0.701437 0.063 Uiso 0.698(18) 1 calc R . . A 1
H10H H -0.008994 1.130152 0.728004 0.063 Uiso 0.698(18) 1 calc R . . A 1
H10I H -0.007490 1.130790 0.726797 0.063 Uiso 0.302(18) 1 calc R . . A 2
H10J H 0.075631 1.033401 0.701607 0.063 Uiso 0.302(18) 1 calc R . . A 2
C104 C 0.0070(16) 0.9996(12) 0.8096(7) 0.046(2) Uani 0.698(18) 1 d . U . A 1
H10K H -0.084585 0.992863 0.814847 0.056 Uiso 0.698(18) 1 calc R . . A 1
H10L H 0.052294 0.930028 0.813211 0.056 Uiso 0.698(18) 1 calc R . . A 1
O200 O 0.0770(13) 1.0102(18) 0.8607(8) 0.059(3) Uani 0.302(18) 1 d . U . A 2
C201 C 0.1745(16) 1.073(2) 0.8344(7) 0.060(4) Uani 0.302(18) 1 d . U . A 2
H20A H 0.256169 1.034288 0.842267 0.072 Uiso 0.302(18) 1 calc R . . A 2
H20B H 0.164034 1.133290 0.857529 0.072 Uiso 0.302(18) 1 calc R . . A 2
C204 C 0.008(4) 1.010(3) 0.7987(19) 0.050(6) Uani 0.302(18) 1 d . U . A 2
H20C H 0.013542 0.938891 0.790548 0.060 Uiso 0.302(18) 1 calc R . . A 2
H20D H -0.081774 1.032365 0.811108 0.060 Uiso 0.302(18) 1 calc R . . A 2

loop_
_atom_site_aniso_label
_atom_site_aniso_U_11
_atom_site_aniso_U_22
_atom_site_aniso_U_33
_atom_site_aniso_U_23
_atom_site_aniso_U_13
_atom_site_aniso_U_12
Co1 0.01459(13) 0.01647(14) 0.01371(14) -0.00213(10) -0.00495(10) -0.00124(10)
K1 0.0194(3) 0.0212(3) 0.0207(3) 0.0002(3) -0.0035(3) 0.0017(2)
K2 0.0198(3) 0.0162(3) 0.0334(4) -0.0010(3) -0.0108(3) -0.0015(2)
N1 0.0179(8) 0.0202(9) 0.0148(8) -0.0024(7) -0.0049(7) -0.0001(7)
N2 0.0179(8) 0.0164(9) 0.0165(9) -0.0016(7) -0.0041(7) -0.0028(7)
C1 0.0218(11) 0.0225(11) 0.0179(10) -0.0021(9) -0.0043(8) -0.0009(8)
C2 0.0330(12) 0.0280(12) 0.0154(11) -0.0026(9) -0.0072(9) -0.0014(9)
C3 0.0327(12) 0.0291(12) 0.0234(12) -0.0047(10) -0.0158(10) -0.0013(10)
C4 0.0216(11) 0.0240(11) 0.0260(12) -0.0033(9) -0.0107(9) -0.0034(9)
C5 0.0173(10) 0.0157(10) 0.0214(11) -0.0020(8) -0.0068(8) -0.0018(8)
C6 0.0182(10) 0.0155(10) 0.0210(11) -0.0033(8) -0.0058(8) -0.0012(8)
C7 0.0168(10) 0.0294(12) 0.0295(12) -0.0058(10) -0.0053(9) -0.0032(9)
C8 0.0193(11) 0.0338(13) 0.0298(13) -0.0067(10) 0.0045(9) -0.0046(9)
C9 0.0276(12) 0.0274(12) 0.0193(11) -0.0048(9) 0.0018(9) -0.0049(9)
C10 0.0256(11) 0.0195(11) 0.0168(10) -0.0038(8) -0.0045(8) -0.0032(8)
N11 0.0174(8) 0.0167(9) 0.0180(9) -0.0047(7) -0.0048(7) -0.0007(7)
Si11 0.0213(3) 0.0171(3) 0.0224(3) -0.0042(2) -0.0034(2) -0.0033(2)
C111 0.0360(13) 0.0262(13) 0.0517(16) -0.0091(11) -0.0207(12) -0.0061(10)
C112 0.0390(14) 0.0194(12) 0.0439(15) -0.0023(11) 0.0122(11) -0.0075(10)
C113 0.0321(12) 0.0201(11) 0.0257(12) -0.0060(9) -0.0041(9) -0.0032(9)
Si12 0.0176(3) 0.0197(3) 0.0175(3) -0.0044(2) -0.0024(2) -0.0018(2)
C121 0.0291(12) 0.0305(12) 0.0214(11) -0.0079(9) -0.0007(9) -0.0030(9)
C122 0.0208(11) 0.0299(13) 0.0363(13) -0.0054(10) -0.0059(10) -0.0030(9)
C123 0.0261(11) 0.0242(12) 0.0256(12) -0.0046(9) 0.0031(9) -0.0058(9)
N21 0.0170(8) 0.0193(9) 0.0146(8) -0.0025(7) -0.0061(7) -0.0018(7)
Si21 0.0183(3) 0.0221(3) 0.0135(3) -0.0015(2) -0.0068(2) -0.0019(2)
C211 0.0345(13) 0.0294(12) 0.0206(11) 0.0001(9) -0.0134(10) 0.0031(10)
C212 0.0237(11) 0.0413(14) 0.0215(11) -0.0061(10) -0.0087(9) -0.0048(10)
C213 0.0274(12) 0.0330(13) 0.0182(11) -0.0048(9) -0.0030(9) -0.0070(9)
Si22 0.0188(3) 0.0175(3) 0.0186(3) -0.0018(2) -0.0074(2) -0.0006(2)
C221 0.0343(13) 0.0210(12) 0.0310(13) -0.0040(10) -0.0094(10) -0.0014(9)
C222 0.0247(11) 0.0248(12) 0.0271(12) -0.0020(9) -0.0058(9) 0.0028(9)
C223 0.0255(11) 0.0228(11) 0.0222(11) 0.0023(9) -0.0096(9) -0.0024(9)
O1C 0.0218(7) 0.0204(8) 0.0243(8) 0.0007(6) -0.0040(6) -0.0007(6)
C2C 0.0256(12) 0.0302(13) 0.0236(12) 0.0032(10) 0.0020(9) -0.0029(9)
C3C 0.0271(12) 0.0302(12) 0.0227(12) -0.0067(10) 0.0000(9) -0.0003(9)
O4C 0.0237(8) 0.0219(8) 0.0227(8) -0.0041(6) -0.0029(6) 0.0036(6)
C5C 0.0239(11) 0.0251(12) 0.0337(13) -0.0047(10) 0.0005(10) 0.0069(9)
C6C 0.0175(11) 0.0299(13) 0.0375(14) -0.0014(10) -0.0047(9) 0.0029(9)
O7C 0.0194(7) 0.0290(8) 0.0243(8) -0.0004(6) -0.0078(6) 0.0007(6)
C8C 0.0264(12) 0.0274(12) 0.0258(12) 0.0002(9) -0.0119(9) 0.0008(9)
C16C 0.0248(11) 0.0248(12) 0.0259(12) 0.0032(9) -0.0087(9) 0.0030(9)
O1K 0.0313(8) 0.0203(8) 0.0302(9) -0.0078(7) -0.0110(7) 0.0014(6)
C2K 0.0409(14) 0.0211(12) 0.0349(13) -0.0071(10) -0.0092(11) -0.0075(10)
C3K 0.0365(13) 0.0268(12) 0.0323(13) -0.0046(10) -0.0059(10) -0.0151(10)
O4K 0.0214(8) 0.0257(8) 0.0366(9) -0.0022(7) -0.0057(7) -0.0068(6)
C5K 0.0173(11) 0.0441(15) 0.0408(14) -0.0063(12) -0.0061(10) -0.0082(10)
C6K 0.0194(11) 0.0435(15) 0.0355(14) -0.0053(11) -0.0124(10) -0.0012(10)
O7K 0.0245(8) 0.0327(9) 0.0281(8) -0.0051(7) -0.0110(7) 0.0012(7)
C8K 0.0324(13) 0.0275(13) 0.0355(14) -0.0062(10) -0.0155(11) 0.0121(10)
C16K 0.0392(14) 0.0272(13) 0.0446(15) -0.0133(11) -0.0177(12) 0.0143(10)
O300 0.0433(12) 0.0429(12) 0.1164(19) -0.0424(12) 0.0019(12) -0.0081(9)
C301 0.0490(19) 0.064(2) 0.075(2) -0.0253(18) -0.0027(16) -0.0031(15)
C302 0.063(2) 0.066(2) 0.069(2) -0.0118(17) -0.0139(17) -0.0288(17)
C303 0.078(3) 0.056(2) 0.146(4) -0.053(2) 0.038(3) -0.0286(19)
C304 0.0538(19) 0.0436(18) 0.094(3) -0.0317(17) -0.0097(18) 0.0018(14)
O100 0.073(4) 0.063(3) 0.0366(18) -0.015(2) -0.003(2) -0.026(3)
C101 0.062(5) 0.073(4) 0.055(3) -0.019(3) -0.014(3) -0.031(3)
C102 0.064(2) 0.070(2) 0.0543(19) -0.0096(16) -0.0079(16) -0.0237(17)
C103 0.0530(18) 0.0545(19) 0.0561(19) -0.0233(15) -0.0167(15) 0.0024(14)
C104 0.033(4) 0.059(5) 0.051(5) -0.026(4) 0.002(4) -0.005(4)
O200 0.044(6) 0.098(11) 0.045(4) -0.038(6) -0.004(4) -0.004(5)
C201 0.049(7) 0.099(13) 0.049(5) -0.045(7) -0.008(5) -0.015(7)
C204 0.042(11) 0.068(13) 0.051(8) -0.030(6) -0.010(7) -0.014(9)

_geom_special_details            
;
 All esds (except the esd in the dihedral angle between two l.s. planes)
 are estimated using the full covariance matrix.  The cell esds are taken
 into account individually in the estimation of esds in distances, angles
 and torsion angles; correlations between esds in cell parameters are only
 used when they are defined by crystal symmetry.  An approximate (isotropic)
 treatment of cell esds is used for estimating esds involving l.s. planes.
;
loop_
_geom_bond_atom_site_label_1
_geom_bond_atom_site_label_2
_geom_bond_distance
_geom_bond_site_symmetry_2
_geom_bond_publ_flag
Co1 N1 1.9980(16) . ?
Co1 N2 1.9966(16) . ?
Co1 N11 2.0037(16) . ?
Co1 N21 2.0079(16) . ?
K1 O1C 2.7693(14) 2_576 ?
K1 O1C 2.7693(14) . ?
K1 O4C 2.8015(14) 2_576 ?
K1 O4C 2.8015(14) . ?
K1 O7C 2.8177(14) 2_576 ?
K1 O7C 2.8177(14) . ?
K1 O300 2.7332(18) 2_576 ?
K1 O300 2.7332(18) . ?
K2 O1K 2.7519(14) . ?
K2 O1K 2.7518(14) 2_577 ?
K2 O4K 2.7995(14) . ?
K2 O4K 2.7996(14) 2_577 ?
K2 O7K 2.8467(14) . ?
K2 O7K 2.8467(14) 2_577 ?
K2 O100 2.720(6) 2_577 ?
K2 O100 2.720(6) . ?
K2 O200 2.735(13) 2_577 ?
K2 O200 2.735(13) . ?
K2 C201 3.506(14) . ?
K2 C201 3.506(14) 2_577 ?
N1 C1 1.359(2) . ?
N1 C5 1.385(2) . ?
N2 C6 1.379(2) . ?
N2 C10 1.357(2) . ?
C1 H1 0.9500 . ?
C1 C2 1.369(3) . ?
C2 H2 0.9500 . ?
C2 C3 1.405(3) . ?
C3 H3 0.9500 . ?
C3 C4 1.371(3) . ?
C4 H4 0.9500 . ?
C4 C5 1.413(3) . ?
C5 C6 1.432(3) . ?
C6 C7 1.404(3) . ?
C7 H7 0.9500 . ?
C7 C8 1.365(3) . ?
C8 H8 0.9500 . ?
C8 C9 1.412(3) . ?
C9 H9 0.9500 . ?
C9 C10 1.360(3) . ?
C10 H10 0.9500 . ?
N11 Si11 1.7004(16) . ?
N11 Si12 1.6964(16) . ?
Si11 C111 1.884(2) . ?
Si11 C112 1.874(2) . ?
Si11 C113 1.885(2) . ?
C111 H11A 0.9800 . ?
C111 H11B 0.9800 . ?
C111 H11C 0.9800 . ?
C112 H11D 0.9800 . ?
C112 H11E 0.9800 . ?
C112 H11F 0.9800 . ?
C113 H11G 0.9800 . ?
C113 H11H 0.9800 . ?
C113 H11I 0.9800 . ?
Si12 C121 1.888(2) . ?
Si12 C122 1.886(2) . ?
Si12 C123 1.874(2) . ?
C121 H12A 0.9800 . ?
C121 H12B 0.9800 . ?
C121 H12C 0.9800 . ?
C122 H12D 0.9800 . ?
C122 H12E 0.9800 . ?
C122 H12F 0.9800 . ?
C123 H12G 0.9800 . ?
C123 H12H 0.9800 . ?
C123 H12I 0.9800 . ?
N21 Si21 1.6928(16) . ?
N21 Si22 1.6983(16) . ?
Si21 C211 1.871(2) . ?
Si21 C212 1.887(2) . ?
Si21 C213 1.887(2) . ?
C211 H21A 0.9800 . ?
C211 H21B 0.9800 . ?
C211 H21C 0.9800 . ?
C212 H21D 0.9800 . ?
C212 H21E 0.9800 . ?
C212 H21F 0.9800 . ?
C213 H21G 0.9800 . ?
C213 H21H 0.9800 . ?
C213 H21I 0.9800 . ?
Si22 C221 1.893(2) . ?
Si22 C222 1.877(2) . ?
Si22 C223 1.884(2) . ?
C221 H22A 0.9800 . ?
C221 H22B 0.9800 . ?
C221 H22C 0.9800 . ?
C222 H22D 0.9800 . ?
C222 H22E 0.9800 . ?
C222 H22F 0.9800 . ?
C223 H22G 0.9800 . ?
C223 H22H 0.9800 . ?
C223 H22I 0.9800 . ?
O1C C2C 1.424(2) . ?
O1C C16C 1.427(2) . ?
C2C H2CA 0.9900 . ?
C2C H2CB 0.9900 . ?
C2C C3C 1.497(3) . ?
C3C H3CA 0.9900 . ?
C3C H3CB 0.9900 . ?
C3C O4C 1.421(2) . ?
O4C C5C 1.426(2) . ?
C5C H5CA 0.9900 . ?
C5C H5CB 0.9900 . ?
C5C C6C 1.489(3) . ?
C6C H6CA 0.9900 . ?
C6C H6CB 0.9900 . ?
C6C O7C 1.424(2) . ?
O7C C8C 1.424(2) . ?
C8C H8CA 0.9900 . ?
C8C H8CB 0.9900 . ?
C8C C16C 1.495(3) 2_576 ?
C16C H16C 0.9900 . ?
C16C H16D 0.9900 . ?
O1K C2K 1.423(2) . ?
O1K C16K 1.419(3) . ?
C2K H2KA 0.9900 . ?
C2K H2KB 0.9900 . ?
C2K C3K 1.495(3) . ?
C3K H3KA 0.9900 . ?
C3K H3KB 0.9900 . ?
C3K O4K 1.426(3) . ?
O4K C5K 1.419(3) . ?
C5K H5KA 0.9900 . ?
C5K H5KB 0.9900 . ?
C5K C6K 1.492(3) . ?
C6K H6KA 0.9900 . ?
C6K H6KB 0.9900 . ?
C6K O7K 1.420(3) . ?
O7K C8K 1.426(3) . ?
C8K H8KA 0.9900 . ?
C8K H8KB 0.9900 . ?
C8K C16K 1.495(3) 2_577 ?
C16K H16A 0.9900 . ?
C16K H16B 0.9900 . ?
O300 C301 1.408(3) . ?
O300 C304 1.408(3) . ?
C301 H30A 0.9900 . ?
C301 H30B 0.9900 . ?
C301 C302 1.491(4) . ?
C302 H30C 0.9900 . ?
C302 H30D 0.9900 . ?
C302 C303 1.467(5) . ?
C303 H30E 0.9900 . ?
C303 H30F 0.9900 . ?
C303 C304 1.452(4) . ?
C304 H30G 0.9900 . ?
C304 H30H 0.9900 . ?
O100 C101 1.438(8) . ?
O100 C104 1.398(18) . ?
C101 H10A 0.9900 . ?
C101 H10B 0.9900 . ?
C101 C102 1.496(7) . ?
C102 H10C 0.9900 . ?
C102 H10D 0.9900 . ?
C102 H10E 0.9900 . ?
C102 H10F 0.9900 . ?
C102 C103 1.501(4) . ?
C102 C201 1.555(17) . ?
C103 H10G 0.9900 . ?
C103 H10H 0.9900 . ?
C103 H10I 0.9900 . ?
C103 H10J 0.9900 . ?
C103 C104 1.551(15) . ?
C103 C204 1.33(4) . ?
C104 H10K 0.9900 . ?
C104 H10L 0.9900 . ?
O200 C201 1.381(19) . ?
O200 C204 1.54(4) . ?
C201 H20A 0.9900 . ?
C201 H20B 0.9900 . ?
C204 H20C 0.9900 . ?
C204 H20D 0.9900 . ?

loop_
_geom_angle_atom_site_label_1
_geom_angle_atom_site_label_2
_geom_angle_atom_site_label_3
_geom_angle
_geom_angle_site_symmetry_1
_geom_angle_site_symmetry_3
_geom_angle_publ_flag
N1 Co1 N11 102.83(6) . . ?
N1 Co1 N21 121.61(6) . . ?
N2 Co1 N1 80.63(6) . . ?
N2 Co1 N11 120.18(6) . . ?
N2 Co1 N21 103.38(6) . . ?
N11 Co1 N21 121.91(6) . . ?
O1C K1 O1C 180.00(5) 2_576 . ?
O1C K1 O4C 61.47(4) . . ?
O1C K1 O4C 118.53(4) . 2_576 ?
O1C K1 O4C 118.53(4) 2_576 . ?
O1C K1 O4C 61.47(4) 2_576 2_576 ?
O1C K1 O7C 119.18(4) 2_576 2_576 ?
O1C K1 O7C 119.19(4) . . ?
O1C K1 O7C 60.82(4) 2_576 . ?
O1C K1 O7C 60.81(4) . 2_576 ?
O4C K1 O4C 180.0 . 2_576 ?
O4C K1 O7C 59.24(4) . . ?
O4C K1 O7C 120.76(4) 2_576 . ?
O4C K1 O7C 120.76(4) . 2_576 ?
O4C K1 O7C 59.24(4) 2_576 2_576 ?
O7C K1 O7C 180.0 2_576 . ?
O300 K1 O1C 89.01(6) . 2_576 ?
O300 K1 O1C 89.01(6) 2_576 . ?
O300 K1 O1C 90.99(6) . . ?
O300 K1 O1C 90.99(6) 2_576 2_576 ?
O300 K1 O4C 79.79(5) 2_576 2_576 ?
O300 K1 O4C 100.21(5) . 2_576 ?
O300 K1 O4C 79.79(5) . . ?
O300 K1 O4C 100.21(5) 2_576 . ?
O300 K1 O7C 88.93(5) 2_576 . ?
O300 K1 O7C 88.93(5) . 2_576 ?
O300 K1 O7C 91.07(5) 2_576 2_576 ?
O300 K1 O7C 91.07(5) . . ?
O300 K1 O300 180.0 2_576 . ?
O1K K2 O1K 179.999(13) 2_577 . ?
O1K K2 O4K 119.02(4) . 2_577 ?
O1K K2 O4K 60.98(4) 2_577 2_577 ?
O1K K2 O4K 60.98(4) . . ?
O1K K2 O4K 119.02(4) 2_577 . ?
O1K K2 O7K 119.07(4) 2_577 2_577 ?
O1K K2 O7K 119.07(4) . . ?
O1K K2 O7K 60.93(4) . 2_577 ?
O1K K2 O7K 60.93(4) 2_577 . ?
O1K K2 C201 78.3(4) . 2_577 ?
O1K K2 C201 101.7(4) . . ?
O1K K2 C201 101.7(4) 2_577 2_577 ?
O1K K2 C201 78.3(4) 2_577 . ?
O4K K2 O4K 180.00(6) . 2_577 ?
O4K K2 O7K 120.55(4) . 2_577 ?
O4K K2 O7K 59.45(4) 2_577 2_577 ?
O4K K2 O7K 59.44(4) . . ?
O4K K2 O7K 120.56(4) 2_577 . ?
O4K K2 C201 76.4(2) 2_577 . ?
O4K K2 C201 103.6(2) 2_577 2_577 ?
O4K K2 C201 76.4(2) . 2_577 ?
O4K K2 C201 103.6(2) . . ?
O7K K2 O7K 180.00(6) 2_577 . ?
O7K K2 C201 103.2(4) 2_577 2_577 ?
O7K K2 C201 76.8(4) . 2_577 ?
O7K K2 C201 103.2(4) . . ?
O7K K2 C201 76.8(4) 2_577 . ?
O100 K2 O1K 78.49(16) . 2_577 ?
O100 K2 O1K 101.51(16) 2_577 2_577 ?
O100 K2 O1K 101.51(16) . . ?
O100 K2 O1K 78.49(16) 2_577 . ?
O100 K2 O4K 81.94(14) . . ?
O100 K2 O4K 98.06(14) . 2_577 ?
O100 K2 O4K 98.06(14) 2_577 . ?
O100 K2 O4K 81.94(14) 2_577 2_577 ?
O100 K2 O7K 82.0(2) . . ?
O100 K2 O7K 98.0(2) . 2_577 ?
O100 K2 O7K 98.0(2) 2_577 . ?
O100 K2 O7K 82.0(2) 2_577 2_577 ?
O100 K2 O100 180.0 . 2_577 ?
O100 K2 O200 166.0(3) . 2_577 ?
O100 K2 O200 14.0(3) 2_577 2_577 ?
O100 K2 C201 155.3(2) . 2_577 ?
O100 K2 C201 24.7(2) 2_577 2_577 ?
O200 K2 O1K 89.7(5) . . ?
O200 K2 O1K 90.3(5) 2_577 . ?
O200 K2 O4K 97.6(3) 2_577 . ?
O200 K2 O4K 82.4(3) . . ?
O200 K2 O7K 94.3(4) . . ?
O200 K2 O7K 85.7(4) 2_577 . ?
O200 K2 O200 180.0 2_577 . ?
O200 K2 C201 21.3(4) 2_577 2_577 ?
O200 K2 C201 21.3(4) . . ?
O200 K2 C201 158.7(4) . 2_577 ?
O200 K2 C201 158.7(4) 2_577 . ?
C201 K2 C201 180.0 . 2_577 ?
C1 N1 Co1 126.88(13) . . ?
C1 N1 C5 117.24(16) . . ?
C5 N1 Co1 114.57(12) . . ?
C6 N2 Co1 115.22(13) . . ?
C10 N2 Co1 126.71(13) . . ?
C10 N2 C6 117.44(17) . . ?
N1 C1 H1 117.8 . . ?
N1 C1 C2 124.45(19) . . ?
C2 C1 H1 117.8 . . ?
C1 C2 H2 120.8 . . ?
C1 C2 C3 118.45(19) . . ?
C3 C2 H2 120.8 . . ?
C2 C3 H3 120.5 . . ?
C4 C3 C2 118.91(19) . . ?
C4 C3 H3 120.5 . . ?
C3 C4 H4 119.7 . . ?
C3 C4 C5 120.60(19) . . ?
C5 C4 H4 119.7 . . ?
N1 C5 C4 120.31(18) . . ?
N1 C5 C6 114.71(16) . . ?
C4 C5 C6 124.94(18) . . ?
N2 C6 C5 114.27(17) . . ?
N2 C6 C7 120.86(18) . . ?
C7 C6 C5 124.84(18) . . ?
C6 C7 H7 119.9 . . ?
C8 C7 C6 120.17(19) . . ?
C8 C7 H7 119.9 . . ?
C7 C8 H8 120.6 . . ?
C7 C8 C9 118.86(19) . . ?
C9 C8 H8 120.6 . . ?
C8 C9 H9 120.6 . . ?
C10 C9 C8 118.7(2) . . ?
C10 C9 H9 120.6 . . ?
N2 C10 C9 123.89(19) . . ?
N2 C10 H10 118.1 . . ?
C9 C10 H10 118.1 . . ?
Si11 N11 Co1 115.63(8) . . ?
Si12 N11 Co1 118.99(9) . . ?
Si12 N11 Si11 122.25(10) . . ?
N11 Si11 C111 113.79(9) . . ?
N11 Si11 C112 113.85(9) . . ?
N11 Si11 C113 113.37(9) . . ?
C111 Si11 C113 104.42(10) . . ?
C112 Si11 C111 106.44(12) . . ?
C112 Si11 C113 103.99(10) . . ?
Si11 C111 H11A 109.5 . . ?
Si11 C111 H11B 109.5 . . ?
Si11 C111 H11C 109.5 . . ?
H11A C111 H11B 109.5 . . ?
H11A C111 H11C 109.5 . . ?
H11B C111 H11C 109.5 . . ?
Si11 C112 H11D 109.5 . . ?
Si11 C112 H11E 109.5 . . ?
Si11 C112 H11F 109.5 . . ?
H11D C112 H11E 109.5 . . ?
H11D C112 H11F 109.5 . . ?
H11E C112 H11F 109.5 . . ?
Si11 C113 H11G 109.5 . . ?
Si11 C113 H11H 109.5 . . ?
Si11 C113 H11I 109.5 . . ?
H11G C113 H11H 109.5 . . ?
H11G C113 H11I 109.5 . . ?
H11H C113 H11I 109.5 . . ?
N11 Si12 C121 113.75(9) . . ?
N11 Si12 C122 113.60(9) . . ?
N11 Si12 C123 112.54(9) . . ?
C122 Si12 C121 105.66(10) . . ?
C123 Si12 C121 104.42(10) . . ?
C123 Si12 C122 106.07(10) . . ?
Si12 C121 H12A 109.5 . . ?
Si12 C121 H12B 109.5 . . ?
Si12 C121 H12C 109.5 . . ?
H12A C121 H12B 109.5 . . ?
H12A C121 H12C 109.5 . . ?
H12B C121 H12C 109.5 . . ?
Si12 C122 H12D 109.5 . . ?
Si12 C122 H12E 109.5 . . ?
Si12 C122 H12F 109.5 . . ?
H12D C122 H12E 109.5 . . ?
H12D C122 H12F 109.5 . . ?
H12E C122 H12F 109.5 . . ?
Si12 C123 H12G 109.5 . . ?
Si12 C123 H12H 109.5 . . ?
Si12 C123 H12I 109.5 . . ?
H12G C123 H12H 109.5 . . ?
H12G C123 H12I 109.5 . . ?
H12H C123 H12I 109.5 . . ?
Si21 N21 Co1 118.45(9) . . ?
Si21 N21 Si22 125.32(10) . . ?
Si22 N21 Co1 114.22(8) . . ?
N21 Si21 C211 112.52(9) . . ?
N21 Si21 C212 113.54(9) . . ?
N21 Si21 C213 113.86(9) . . ?
C211 Si21 C212 104.84(10) . . ?
C211 Si21 C213 104.96(10) . . ?
C212 Si21 C213 106.30(10) . . ?
Si21 C211 H21A 109.5 . . ?
Si21 C211 H21B 109.5 . . ?
Si21 C211 H21C 109.5 . . ?
H21A C211 H21B 109.5 . . ?
H21A C211 H21C 109.5 . . ?
H21B C211 H21C 109.5 . . ?
Si21 C212 H21D 109.5 . . ?
Si21 C212 H21E 109.5 . . ?
Si21 C212 H21F 109.5 . . ?
H21D C212 H21E 109.5 . . ?
H21D C212 H21F 109.5 . . ?
H21E C212 H21F 109.5 . . ?
Si21 C213 H21G 109.5 . . ?
Si21 C213 H21H 109.5 . . ?
Si21 C213 H21I 109.5 . . ?
H21G C213 H21H 109.5 . . ?
H21G C213 H21I 109.5 . . ?
H21H C213 H21I 109.5 . . ?
N21 Si22 C221 114.68(9) . . ?
N21 Si22 C222 113.29(9) . . ?
N21 Si22 C223 112.13(9) . . ?
C222 Si22 C221 103.83(10) . . ?
C222 Si22 C223 106.14(10) . . ?
C223 Si22 C221 105.99(10) . . ?
Si22 C221 H22A 109.5 . . ?
Si22 C221 H22B 109.5 . . ?
Si22 C221 H22C 109.5 . . ?
H22A C221 H22B 109.5 . . ?
H22A C221 H22C 109.5 . . ?
H22B C221 H22C 109.5 . . ?
Si22 C222 H22D 109.5 . . ?
Si22 C222 H22E 109.5 . . ?
Si22 C222 H22F 109.5 . . ?
H22D C222 H22E 109.5 . . ?
H22D C222 H22F 109.5 . . ?
H22E C222 H22F 109.5 . . ?
Si22 C223 H22G 109.5 . . ?
Si22 C223 H22H 109.5 . . ?
Si22 C223 H22I 109.5 . . ?
H22G C223 H22H 109.5 . . ?
H22G C223 H22I 109.5 . . ?
H22H C223 H22I 109.5 . . ?
C2C O1C K1 113.88(11) . . ?
C2C O1C C16C 111.50(15) . . ?
C16C O1C K1 114.15(11) . . ?
O1C C2C H2CA 109.9 . . ?
O1C C2C H2CB 109.9 . . ?
O1C C2C C3C 108.75(17) . . ?
H2CA C2C H2CB 108.3 . . ?
C3C C2C H2CA 109.9 . . ?
C3C C2C H2CB 109.9 . . ?
C2C C3C H3CA 109.9 . . ?
C2C C3C H3CB 109.9 . . ?
H3CA C3C H3CB 108.3 . . ?
O4C C3C C2C 109.09(17) . . ?
O4C C3C H3CA 109.9 . . ?
O4C C3C H3CB 109.9 . . ?
C3C O4C K1 112.27(11) . . ?
C3C O4C C5C 111.70(16) . . ?
C5C O4C K1 116.44(12) . . ?
O4C C5C H5CA 110.0 . . ?
O4C C5C H5CB 110.0 . . ?
O4C C5C C6C 108.47(17) . . ?
H5CA C5C H5CB 108.4 . . ?
C6C C5C H5CA 110.0 . . ?
C6C C5C H5CB 110.0 . . ?
C5C C6C H6CA 110.1 . . ?
C5C C6C H6CB 110.1 . . ?
H6CA C6C H6CB 108.4 . . ?
O7C C6C C5C 108.08(17) . . ?
O7C C6C H6CA 110.1 . . ?
O7C C6C H6CB 110.1 . . ?
C6C O7C K1 116.00(12) . . ?
C6C O7C C8C 112.25(15) . . ?
C8C O7C K1 113.50(11) . . ?
O7C C8C H8CA 110.0 . . ?
O7C C8C H8CB 110.0 . . ?
O7C C8C C16C 108.61(17) . 2_576 ?
H8CA C8C H8CB 108.3 . . ?
C16C C8C H8CA 110.0 2_576 . ?
C16C C8C H8CB 110.0 2_576 . ?
O1C C16C C8C 108.40(17) . 2_576 ?
O1C C16C H16C 110.0 . . ?
O1C C16C H16D 110.0 . . ?
C8C C16C H16C 110.0 2_576 . ?
C8C C16C H16D 110.0 2_576 . ?
H16C C16C H16D 108.4 . . ?
C2K O1K K2 114.35(12) . . ?
C16K O1K K2 115.66(13) . . ?
C16K O1K C2K 112.22(16) . . ?
O1K C2K H2KA 110.1 . . ?
O1K C2K H2KB 110.1 . . ?
O1K C2K C3K 108.08(18) . . ?
H2KA C2K H2KB 108.4 . . ?
C3K C2K H2KA 110.1 . . ?
C3K C2K H2KB 110.1 . . ?
C2K C3K H3KA 110.1 . . ?
C2K C3K H3KB 110.1 . . ?
H3KA C3K H3KB 108.4 . . ?
O4K C3K C2K 108.07(18) . . ?
O4K C3K H3KA 110.1 . . ?
O4K C3K H3KB 110.1 . . ?
C3K O4K K2 113.28(12) . . ?
C5K O4K K2 116.47(12) . . ?
C5K O4K C3K 112.97(16) . . ?
O4K C5K H5KA 110.1 . . ?
O4K C5K H5KB 110.1 . . ?
O4K C5K C6K 108.22(18) . . ?
H5KA C5K H5KB 108.4 . . ?
C6K C5K H5KA 110.1 . . ?
C6K C5K H5KB 110.1 . . ?
C5K C6K H6KA 110.0 . . ?
C5K C6K H6KB 110.0 . . ?
H6KA C6K H6KB 108.4 . . ?
O7K C6K C5K 108.47(18) . . ?
O7K C6K H6KA 110.0 . . ?
O7K C6K H6KB 110.0 . . ?
C6K O7K K2 113.76(12) . . ?
C6K O7K C8K 111.98(16) . . ?
C8K O7K K2 110.54(12) . . ?
O7K C8K H8KA 110.0 . . ?
O7K C8K H8KB 110.0 . . ?
O7K C8K C16K 108.42(18) . 2_577 ?
H8KA C8K H8KB 108.4 . . ?
C16K C8K H8KA 110.0 2_577 . ?
C16K C8K H8KB 110.0 2_577 . ?
O1K C16K C8K 108.48(18) . 2_577 ?
O1K C16K H16A 110.0 . . ?
O1K C16K H16B 110.0 . . ?
C8K C16K H16A 110.0 2_577 . ?
C8K C16K H16B 110.0 2_577 . ?
H16A C16K H16B 108.4 . . ?
C301 O300 K1 130.49(16) . . ?
C304 O300 K1 119.65(16) . . ?
C304 O300 C301 109.9(2) . . ?
O300 C301 H30A 110.3 . . ?
O300 C301 H30B 110.3 . . ?
O300 C301 C302 106.9(2) . . ?
H30A C301 H30B 108.6 . . ?
C302 C301 H30A 110.3 . . ?
C302 C301 H30B 110.3 . . ?
C301 C302 H30C 110.8 . . ?
C301 C302 H30D 110.8 . . ?
H30C C302 H30D 108.9 . . ?
C303 C302 C301 104.7(3) . . ?
C303 C302 H30C 110.8 . . ?
C303 C302 H30D 110.8 . . ?
C302 C303 H30E 110.3 . . ?
C302 C303 H30F 110.3 . . ?
H30E C303 H30F 108.5 . . ?
C304 C303 C302 107.2(3) . . ?
C304 C303 H30E 110.3 . . ?
C304 C303 H30F 110.3 . . ?
O300 C304 C303 108.1(3) . . ?
O300 C304 H30G 110.1 . . ?
O300 C304 H30H 110.1 . . ?
C303 C304 H30G 110.1 . . ?
C303 C304 H30H 110.1 . . ?
H30G C304 H30H 108.4 . . ?
C101 O100 K2 115.7(4) . . ?
C104 O100 K2 130.4(7) . . ?
C104 O100 C101 111.4(7) . . ?
O100 C101 H10A 110.4 . . ?
O100 C101 H10B 110.4 . . ?
O100 C101 C102 106.5(4) . . ?
H10A C101 H10B 108.6 . . ?
C102 C101 H10A 110.4 . . ?
C102 C101 H10B 110.4 . . ?
C101 C102 H10C 111.7 . . ?
C101 C102 H10D 111.7 . . ?
C101 C102 C103 100.2(4) . . ?
H10C C102 H10D 109.5 . . ?
H10E C102 H10F 108.5 . . ?
C103 C102 H10C 111.7 . . ?
C103 C102 H10D 111.7 . . ?
C103 C102 H10E 110.2 . . ?
C103 C102 H10F 110.2 . . ?
C103 C102 C201 107.3(6) . . ?
C201 C102 H10E 110.2 . . ?
C201 C102 H10F 110.2 . . ?
C102 C103 H10G 111.2 . . ?
C102 C103 H10H 111.2 . . ?
C102 C103 H10I 110.7 . . ?
C102 C103 H10J 110.7 . . ?
C102 C103 C104 102.7(7) . . ?
H10G C103 H10H 109.1 . . ?
H10I C103 H10J 108.8 . . ?
C104 C103 H10G 111.2 . . ?
C104 C103 H10H 111.2 . . ?
C204 C103 C102 105.3(17) . . ?
C204 C103 H10I 110.7 . . ?
C204 C103 H10J 110.7 . . ?
O100 C104 C103 102.1(10) . . ?
O100 C104 H10K 111.3 . . ?
O100 C104 H10L 111.3 . . ?
C103 C104 H10K 111.3 . . ?
C103 C104 H10L 111.3 . . ?
H10K C104 H10L 109.2 . . ?
C201 O200 K2 112.7(9) . . ?
C201 O200 C204 105.7(18) . . ?
C204 O200 K2 134.0(17) . . ?
K2 C201 H20A 99.7 . . ?
K2 C201 H20B 72.3 . . ?
C102 C201 K2 146.3(8) . . ?
C102 C201 H20A 110.3 . . ?
C102 C201 H20B 110.3 . . ?
O200 C201 K2 46.0(7) . . ?
O200 C201 C102 107.0(10) . . ?
O200 C201 H20A 110.3 . . ?
O200 C201 H20B 110.3 . . ?
H20A C201 H20B 108.6 . . ?
C103 C204 O200 114(3) . . ?
C103 C204 H20C 108.7 . . ?
C103 C204 H20D 108.7 . . ?
O200 C204 H20C 108.7 . . ?
O200 C204 H20D 108.7 . . ?
H20C C204 H20D 107.6 . . ?

loop_
_geom_torsion_atom_site_label_1
_geom_torsion_atom_site_label_2
_geom_torsion_atom_site_label_3
_geom_torsion_atom_site_label_4
_geom_torsion
_geom_torsion_site_symmetry_1
_geom_torsion_site_symmetry_2
_geom_torsion_site_symmetry_3
_geom_torsion_site_symmetry_4
_geom_torsion_publ_flag
Co1 N1 C1 C2 167.82(16) . . . . ?
Co1 N1 C5 C4 -169.66(15) . . . . ?
Co1 N1 C5 C6 8.2(2) . . . . ?
Co1 N2 C6 C5 4.9(2) . . . . ?
Co1 N2 C6 C7 -173.20(15) . . . . ?
Co1 N2 C10 C9 171.86(15) . . . . ?
Co1 N11 Si11 C111 73.27(13) . . . . ?
Co1 N11 Si11 C112 -48.95(13) . . . . ?
Co1 N11 Si11 C113 -167.58(9) . . . . ?
Co1 N11 Si12 C121 -108.47(11) . . . . ?
Co1 N11 Si12 C122 130.59(10) . . . . ?
Co1 N11 Si12 C123 10.03(13) . . . . ?
Co1 N21 Si21 C211 8.46(13) . . . . ?
Co1 N21 Si21 C212 127.35(11) . . . . ?
Co1 N21 Si21 C213 -110.83(11) . . . . ?
Co1 N21 Si22 C221 174.86(10) . . . . ?
Co1 N21 Si22 C222 55.90(12) . . . . ?
Co1 N21 Si22 C223 -64.21(11) . . . . ?
K1 O1C C2C C3C -49.2(2) . . . . ?
K1 O1C C16C C8C 51.96(19) . . . 2_576 ?
K1 O4C C5C C6C 48.5(2) . . . . ?
K1 O7C C8C C16C -47.99(19) . . . 2_576 ?
K1 O300 C301 C302 -164.6(2) . . . . ?
K1 O300 C304 C303 174.0(3) . . . . ?
K2 O1K C2K C3K -51.8(2) . . . . ?
K2 O1K C16K C8K 48.2(2) . . . 2_577 ?
K2 O4K C5K C6K 48.3(2) . . . . ?
K2 O7K C8K C16K -53.07(19) . . . 2_577 ?
K2 O100 C101 C102 156.7(7) . . . . ?
K2 O100 C104 C103 -179.1(6) . . . . ?
K2 O200 C201 C102 -156.1(14) . . . . ?
K2 O200 C204 C103 143(2) . . . . ?
N1 C1 C2 C3 -0.3(3) . . . . ?
N1 C5 C6 N2 -8.5(2) . . . . ?
N1 C5 C6 C7 169.50(18) . . . . ?
N2 C6 C7 C8 0.7(3) . . . . ?
C1 N1 C5 C4 -1.8(3) . . . . ?
C1 N1 C5 C6 176.02(17) . . . . ?
C1 C2 C3 C4 -1.0(3) . . . . ?
C2 C3 C4 C5 0.8(3) . . . . ?
C3 C4 C5 N1 0.6(3) . . . . ?
C3 C4 C5 C6 -176.96(19) . . . . ?
C4 C5 C6 N2 169.19(18) . . . . ?
C4 C5 C6 C7 -12.8(3) . . . . ?
C5 N1 C1 C2 1.7(3) . . . . ?
C5 C6 C7 C8 -177.2(2) . . . . ?
C6 N2 C10 C9 1.5(3) . . . . ?
C6 C7 C8 C9 0.6(3) . . . . ?
C7 C8 C9 C10 -0.9(3) . . . . ?
C8 C9 C10 N2 -0.2(3) . . . . ?
C10 N2 C6 C5 176.36(17) . . . . ?
C10 N2 C6 C7 -1.7(3) . . . . ?
Si11 N11 Si12 C121 50.61(14) . . . . ?
Si11 N11 Si12 C122 -70.33(14) . . . . ?
Si11 N11 Si12 C123 169.12(11) . . . . ?
Si12 N11 Si11 C111 -86.47(14) . . . . ?
Si12 N11 Si11 C112 151.31(12) . . . . ?
Si12 N11 Si11 C113 32.68(15) . . . . ?
Si21 N21 Si22 C221 11.31(15) . . . . ?
Si21 N21 Si22 C222 -107.64(13) . . . . ?
Si21 N21 Si22 C223 132.25(12) . . . . ?
Si22 N21 Si21 C211 171.37(12) . . . . ?
Si22 N21 Si21 C212 -69.75(14) . . . . ?
Si22 N21 Si21 C213 52.08(15) . . . . ?
O1C C2C C3C O4C 67.8(2) . . . . ?
C2C O1C C16C C8C -177.24(17) . . . 2_576 ?
C2C C3C O4C K1 -50.45(19) . . . . ?
C2C C3C O4C C5C 176.64(17) . . . . ?
C3C O4C C5C C6C 179.31(17) . . . . ?
O4C C5C C6C O7C -63.6(2) . . . . ?
C5C C6C O7C K1 48.8(2) . . . . ?
C5C C6C O7C C8C -178.43(17) . . . . ?
C6C O7C C8C C16C 178.03(17) . . . 2_576 ?
C16C O1C C2C C3C 179.89(17) . . . . ?
O1K C2K C3K O4K 67.6(2) . . . . ?
C2K O1K C16K C8K -178.18(18) . . . 2_577 ?
C2K C3K O4K K2 -49.11(19) . . . . ?
C2K C3K O4K C5K 175.70(18) . . . . ?
C3K O4K C5K C6K -178.01(18) . . . . ?
O4K C5K C6K O7K -65.9(2) . . . . ?
C5K C6K O7K K2 51.0(2) . . . . ?
C5K C6K O7K C8K 177.24(18) . . . . ?
C6K O7K C8K C16K 178.96(18) . . . 2_577 ?
C16K O1K C2K C3K 173.94(19) . . . . ?
O300 C301 C302 C303 -18.3(4) . . . . ?
C301 O300 C304 C303 -5.9(4) . . . . ?
C301 C302 C303 C304 14.7(5) . . . . ?
C302 C303 C304 O300 -6.1(5) . . . . ?
C304 O300 C301 C302 15.2(4) . . . . ?
O100 C101 C102 C103 30.0(5) . . . . ?
C101 O100 C104 C103 -18.0(12) . . . . ?
C101 C102 C103 C104 -40.0(8) . . . . ?
C102 C103 C104 O100 36.6(11) . . . . ?
C102 C103 C204 O200 7(3) . . . . ?
C103 C102 C201 K2 -26(2) . . . . ?
C103 C102 C201 O200 6.0(12) . . . . ?
C104 O100 C101 C102 -7.4(9) . . . . ?
C201 C102 C103 C204 -8(2) . . . . ?
C201 O200 C204 C103 -3(3) . . . . ?
C204 O200 C201 K2 154(2) . . . . ?
C204 O200 C201 C102 -2(2) . . . . ?

_shelx_res_file                  
;
TITL GW54_0m_a.res in P-1
    k{18c6}co8.res
    created by SHELXL-2018/3 at 15:11:46 on 23-May-2019
REM Old TITL GW54_0m in P-1
REM SHELXT solution in P-1
REM R1 0.289, Rweak 0.101, Alpha 0.172, Orientation as input
REM Formula found by SHELXT: C44 N2 O8 Si4 K Co
REM #####
REM PART 0
CELL 0.71073 10.8097 13.2648 19.9051 77.712 80.199 83.606
ZERR 2 0.0005 0.0006 0.001 0.002 0.002 0.002
LATT 1
SFAC C H Co K N O Si
UNIT 84 168 2 2 8 16 8
RIGU O100 > C204

L.S. 10
PLAN  10
SIZE 0.07 0.14 0.23
TEMP -173.15
BOND $H
LIST 4
conf
fmap 2
acta
REM <olex2.extras>
REM <HklSrc "%.\\GW54_0m.hkl">
REM </olex2.extras>

WGHT    0.028000    1.590500
FVAR       0.47275   0.69787
CO1   3    0.493210    0.549458    0.761103    11.00000    0.01459    0.01647 =
         0.01371   -0.00213   -0.00495   -0.00124
K1    4    0.000000    1.000000    0.500000    10.50000    0.01942    0.02119 =
         0.02071    0.00018   -0.00351    0.00171
K2    4    0.000000    1.000000    1.000000    10.50000    0.01984    0.01622 =
         0.03336   -0.00102   -0.01075   -0.00145
N1    5    0.392994    0.573732    0.682770    11.00000    0.01789    0.02017 =
         0.01479   -0.00237   -0.00488   -0.00012
N2    5    0.322525    0.525011    0.815536    11.00000    0.01793    0.01640 =
         0.01653   -0.00163   -0.00412   -0.00281
C1    1    0.438704    0.586018    0.613796    11.00000    0.02180    0.02255 =
         0.01788   -0.00212   -0.00433   -0.00093
AFIX  43
H1    2    0.525535    0.596663    0.599746    11.00000   -1.20000
AFIX   0
C2    1    0.368131    0.584096    0.563197    11.00000    0.03301    0.02804 =
         0.01539   -0.00256   -0.00716   -0.00137
AFIX  43
H2    2    0.405154    0.593426    0.515678    11.00000   -1.20000
AFIX   0
C3    1    0.239623    0.567998    0.583189    11.00000    0.03275    0.02910 =
         0.02344   -0.00469   -0.01578   -0.00130
AFIX  43
H3    2    0.187746    0.567334    0.549283    11.00000   -1.20000
AFIX   0
C4    1    0.190364    0.553270    0.652419    11.00000    0.02157    0.02402 =
         0.02600   -0.00335   -0.01069   -0.00345
AFIX  43
H4    2    0.103880    0.541419    0.666633    11.00000   -1.20000
AFIX   0
C5    1    0.267037    0.555554    0.702812    11.00000    0.01735    0.01566 =
         0.02137   -0.00200   -0.00675   -0.00177
C6    1    0.226332    0.536389    0.776379    11.00000    0.01820    0.01548 =
         0.02099   -0.00333   -0.00584   -0.00124
C7    1    0.100263    0.532176    0.808374    11.00000    0.01676    0.02935 =
         0.02946   -0.00584   -0.00527   -0.00317
AFIX  43
H7    2    0.035078    0.539369    0.780752    11.00000   -1.20000
AFIX   0
C8    1    0.071133    0.517769    0.879068    11.00000    0.01931    0.03377 =
         0.02982   -0.00675    0.00453   -0.00464
AFIX  43
H8    2   -0.013897    0.514157    0.901046    11.00000   -1.20000
AFIX   0
C9    1    0.169578    0.508329    0.918963    11.00000    0.02765    0.02739 =
         0.01927   -0.00477    0.00182   -0.00491
AFIX  43
H9    2    0.151896    0.499240    0.968196    11.00000   -1.20000
AFIX   0
C10   1    0.290158    0.512493    0.885576    11.00000    0.02563    0.01949 =
         0.01676   -0.00383   -0.00450   -0.00317
AFIX  43
H10   2    0.355632    0.506270    0.912901    11.00000   -1.20000
AFIX   0
N11   5    0.614574    0.429468    0.742346    11.00000    0.01744    0.01670 =
         0.01798   -0.00467   -0.00484   -0.00065
SI11  7    0.550565    0.314448    0.753862    11.00000    0.02128    0.01710 =
         0.02244   -0.00425   -0.00341   -0.00331
C111  1    0.457157    0.306509    0.683659    11.00000    0.03596    0.02616 =
         0.05172   -0.00910   -0.02070   -0.00606
AFIX 137
H11A  2    0.430261    0.236343    0.690922    11.00000   -1.50000
H11B  2    0.509702    0.322963    0.638107    11.00000   -1.50000
H11C  2    0.382926    0.356093    0.685432    11.00000   -1.50000
AFIX   0
C112  1    0.443706    0.280585    0.838627    11.00000    0.03902    0.01938 =
         0.04389   -0.00229    0.01224   -0.00749
AFIX 137
H11D  2    0.428331    0.207154    0.847508    11.00000   -1.50000
H11E  2    0.363555    0.322789    0.836444    11.00000   -1.50000
H11F  2    0.483355    0.294105    0.876255    11.00000   -1.50000
AFIX   0
C113  1    0.671483    0.200488    0.754407    11.00000    0.03206    0.02014 =
         0.02569   -0.00595   -0.00406   -0.00323
AFIX 137
H11G  2    0.628995    0.136900    0.760589    11.00000   -1.50000
H11H  2    0.719434    0.195410    0.792739    11.00000   -1.50000
H11I  2    0.728899    0.209891    0.710175    11.00000   -1.50000
AFIX   0
SI12  7    0.756594    0.452981    0.693159    11.00000    0.01759    0.01970 =
         0.01747   -0.00442   -0.00238   -0.00181
C121  1    0.772862    0.421320    0.603832    11.00000    0.02914    0.03051 =
         0.02137   -0.00794   -0.00073   -0.00302
AFIX 137
H12A  2    0.855806    0.438479    0.577869    11.00000   -1.50000
H12B  2    0.707074    0.461709    0.578939    11.00000   -1.50000
H12C  2    0.764152    0.347335    0.608315    11.00000   -1.50000
AFIX   0
C122  1    0.893455    0.378262    0.733514    11.00000    0.02083    0.02992 =
         0.03633   -0.00536   -0.00592   -0.00296
AFIX 137
H12D  2    0.972495    0.397768    0.703698    11.00000   -1.50000
H12E  2    0.886604    0.303930    0.738348    11.00000   -1.50000
H12F  2    0.892398    0.394255    0.779469    11.00000   -1.50000
AFIX   0
C123  1    0.788780    0.592770    0.676109    11.00000    0.02606    0.02417 =
         0.02558   -0.00464    0.00306   -0.00582
AFIX 137
H12G  2    0.870609    0.602702    0.646633    11.00000   -1.50000
H12H  2    0.789923    0.613683    0.720333    11.00000   -1.50000
H12I  2    0.722642    0.635044    0.652444    11.00000   -1.50000
AFIX   0
N21   5    0.544867    0.667356    0.796057    11.00000    0.01698    0.01926 =
         0.01465   -0.00247   -0.00609   -0.00184
SI21  7    0.621073    0.639764    0.866141    11.00000    0.01828    0.02210 =
         0.01346   -0.00152   -0.00675   -0.00191
C211  1    0.665995    0.498219    0.892341    11.00000    0.03453    0.02937 =
         0.02055    0.00012   -0.01337    0.00311
AFIX 137
H21A  2    0.702934    0.485448    0.935343    11.00000   -1.50000
H21B  2    0.727654    0.475407    0.855364    11.00000   -1.50000
H21C  2    0.590929    0.459651    0.900040    11.00000   -1.50000
AFIX   0
C212  1    0.773647    0.703446    0.851433    11.00000    0.02369    0.04126 =
         0.02146   -0.00610   -0.00874   -0.00482
AFIX 137
H21D  2    0.821501    0.673261    0.889505    11.00000   -1.50000
H21E  2    0.755487    0.777875    0.849925    11.00000   -1.50000
H21F  2    0.823197    0.692279    0.807228    11.00000   -1.50000
AFIX   0
C213  1    0.525254    0.677680    0.946729    11.00000    0.02738    0.03295 =
         0.01820   -0.00476   -0.00302   -0.00702
AFIX 137
H21G  2    0.574254    0.658259    0.985305    11.00000   -1.50000
H21H  2    0.447584    0.641829    0.958832    11.00000   -1.50000
H21I  2    0.504160    0.752643    0.937904    11.00000   -1.50000
AFIX   0
SI22  7    0.473487    0.784513    0.764691    11.00000    0.01876    0.01752 =
         0.01864   -0.00181   -0.00741   -0.00058
C221  1    0.510224    0.894512    0.803235    11.00000    0.03433    0.02100 =
         0.03103   -0.00402   -0.00944   -0.00139
AFIX 137
H22A  2    0.483653    0.960710    0.774867    11.00000   -1.50000
H22B  2    0.601019    0.891052    0.804005    11.00000   -1.50000
H22C  2    0.465018    0.888711    0.850783    11.00000   -1.50000
AFIX   0
C222  1    0.297052    0.787950    0.781850    11.00000    0.02467    0.02481 =
         0.02710   -0.00199   -0.00580    0.00281
AFIX 137
H22D  2    0.261448    0.857870    0.764109    11.00000   -1.50000
H22E  2    0.268817    0.769005    0.832029    11.00000   -1.50000
H22F  2    0.268755    0.738770    0.758374    11.00000   -1.50000
AFIX   0
C223  1    0.517668    0.825232    0.667659    11.00000    0.02554    0.02283 =
         0.02215    0.00235   -0.00962   -0.00244
AFIX 137
H22G  2    0.474295    0.892834    0.651735    11.00000   -1.50000
H22H  2    0.492776    0.773973    0.644624    11.00000   -1.50000
H22I  2    0.608915    0.830067    0.656146    11.00000   -1.50000
AFIX   0

O1C   6   -0.011116    0.901352    0.638042    11.00000    0.02182    0.02042 =
         0.02429    0.00068   -0.00402   -0.00074
C2C   1   -0.135782    0.886871    0.673465    11.00000    0.02557    0.03018 =
         0.02365    0.00318    0.00199   -0.00290
AFIX  23
H2CA  2   -0.134543    0.863432    0.724023    11.00000   -1.20000
H2CB  2   -0.172104    0.833341    0.656571    11.00000   -1.20000
AFIX   0
C3C   1   -0.214113    0.987446    0.660068    11.00000    0.02711    0.03017 =
         0.02273   -0.00673   -0.00004   -0.00029
AFIX  23
H3CA  2   -0.297425    0.981637    0.689698    11.00000   -1.20000
H3CB  2   -0.172225    1.042856    0.671644    11.00000   -1.20000
AFIX   0
O4C   6   -0.229580    1.012402    0.588775    11.00000    0.02370    0.02193 =
         0.02266   -0.00409   -0.00290    0.00360
C5C   1   -0.309621    1.104688    0.573635    11.00000    0.02395    0.02508 =
         0.03368   -0.00468    0.00051    0.00694
AFIX  23
H5CA  2   -0.274054    1.163277    0.585333    11.00000   -1.20000
H5CB  2   -0.394038    1.095890    0.601653    11.00000   -1.20000
AFIX   0
C6C   1   -0.319812    1.126255    0.498139    11.00000    0.01755    0.02993 =
         0.03747   -0.00142   -0.00473    0.00287
AFIX  23
H6CA  2   -0.351164    1.066199    0.485877    11.00000   -1.20000
H6CB  2   -0.379566    1.187370    0.486861    11.00000   -1.20000
AFIX   0
O7C   6   -0.197961    1.145344    0.459955    11.00000    0.01942    0.02902 =
         0.02428   -0.00038   -0.00781    0.00074
C8C   1   -0.198744    1.169608    0.386783    11.00000    0.02640    0.02736 =
         0.02582    0.00020   -0.01194    0.00078
AFIX  23
H8CA  2   -0.258208    1.230675    0.374816    11.00000   -1.20000
H8CB  2   -0.226285    1.110565    0.371435    11.00000   -1.20000
AFIX   0
C16C  1    0.068587    0.807972    0.648896    11.00000    0.02482    0.02479 =
         0.02591    0.00315   -0.00867    0.00303
AFIX  23
H16C  2    0.037213    0.754411    0.629659    11.00000   -1.20000
H16D  2    0.069083    0.781860    0.699300    11.00000   -1.20000
AFIX   0

O1K   6    0.038120    0.787668    1.021844    11.00000    0.03133    0.02034 =
         0.03024   -0.00782   -0.01103    0.00143
C2K   1   -0.039151    0.739925    0.988464    11.00000    0.04092    0.02107 =
         0.03492   -0.00710   -0.00925   -0.00751
AFIX  23
H2KA  2   -0.029470    0.663780    1.003721    11.00000   -1.20000
H2KB  2   -0.014180    0.757138    0.937388    11.00000   -1.20000
AFIX   0
C3K   1   -0.172881    0.779149    1.007721    11.00000    0.03648    0.02677 =
         0.03225   -0.00459   -0.00587   -0.01506
AFIX  23
H3KA  2   -0.230207    0.740265    0.990780    11.00000   -1.20000
H3KB  2   -0.194577    0.769849    1.058913    11.00000   -1.20000
AFIX   0
O4K   6   -0.186113    0.886263    0.976539    11.00000    0.02138    0.02573 =
         0.03663   -0.00221   -0.00568   -0.00679
C5K   1   -0.312000    0.930055    0.987211    11.00000    0.01726    0.04406 =
         0.04084   -0.00630   -0.00610   -0.00819
AFIX  23
H5KA  2   -0.341759    0.925558    1.037549    11.00000   -1.20000
H5KB  2   -0.367828    0.891897    0.968665    11.00000   -1.20000
AFIX   0
C6K   1   -0.315125    1.040538    0.950417    11.00000    0.01938    0.04351 =
         0.03553   -0.00533   -0.01236   -0.00123
AFIX  23
H6KA  2   -0.277933    1.045352    0.900931    11.00000   -1.20000
H6KB  2   -0.403238    1.070998    0.952533    11.00000   -1.20000
AFIX   0
O7K   6   -0.245153    1.095162    0.983256    11.00000    0.02445    0.03267 =
         0.02811   -0.00509   -0.01098    0.00119
C8K   1   -0.238539    1.200842    0.948997    11.00000    0.03241    0.02753 =
         0.03546   -0.00617   -0.01549    0.01206
AFIX  23
H8KA  2   -0.324422    1.235505    0.948290    11.00000   -1.20000
H8KB  2   -0.196345    1.205182    0.900369    11.00000   -1.20000
AFIX   0
C16K  1    0.165682    0.747253    1.012461    11.00000    0.03920    0.02717 =
         0.04460   -0.01334   -0.01769    0.01429
AFIX  23
H16A  2    0.200704    0.760258    0.962369    11.00000   -1.20000
H16B  2    0.171450    0.671587    1.030437    11.00000   -1.20000
AFIX   0

O300  6   -0.115214    0.844199    0.471219    11.00000    0.04333    0.04292 =
         0.11645   -0.04236    0.00193   -0.00809
C301  1   -0.243406    0.834134    0.470865    11.00000    0.04898    0.06408 =
         0.07519   -0.02529   -0.00274   -0.00314
AFIX  23
H30A  2   -0.271776    0.878914    0.428900    11.00000   -1.20000
H30B  2   -0.295417    0.854576    0.512518    11.00000   -1.20000
AFIX   0
C302  1   -0.255597    0.723271    0.470970    11.00000    0.06341    0.06628 =
         0.06910   -0.01179   -0.01387   -0.02878
AFIX  23
H30C  2   -0.288521    0.686095    0.518154    11.00000   -1.20000
H30D  2   -0.312851    0.716880    0.438469    11.00000   -1.20000
AFIX   0
C303  1   -0.127277    0.681957    0.448227    11.00000    0.07755    0.05619 =
         0.14586   -0.05319    0.03793   -0.02865
AFIX  23
H30E  2   -0.107883    0.614210    0.478212    11.00000   -1.20000
H30F  2   -0.118514    0.672342    0.399617    11.00000   -1.20000
AFIX   0
C304  1   -0.042207    0.756346    0.453468    11.00000    0.05380    0.04362 =
         0.09408   -0.03167   -0.00966    0.00179
AFIX  23
H30G  2    0.011313    0.725792    0.489548    11.00000   -1.20000
H30H  2    0.013202    0.775864    0.408508    11.00000   -1.20000
AFIX   0

PART 1
O100  6    0.035342    1.051380    0.858690    21.00000    0.07314    0.06291 =
         0.03656   -0.01516   -0.00330   -0.02618
C101  1    0.126377    1.125648    0.827906    21.00000    0.06214    0.07303 =
         0.05479   -0.01906   -0.01425   -0.03072
AFIX  23
H10A  2    0.197907    1.114417    0.854488    21.00000   -1.20000
H10B  2    0.087469    1.196901    0.827592    21.00000   -1.20000
AFIX   0
PART 0
C102  1    0.170545    1.109906    0.755169    11.00000    0.06390    0.06953 =
         0.05432   -0.00958   -0.00787   -0.02365
PART 1
AFIX  23
H10C  2    0.243106    1.057513    0.752919    21.00000   -1.20000
H10D  2    0.193223    1.175392    0.723111    21.00000   -1.20000
AFIX  23
PART 0
PART 2
H10E  2    0.167526    1.186372    0.742453   -21.00000   -1.20000
H10F  2    0.246588    1.081146    0.728011   -21.00000   -1.20000
AFIX   0
PART 0
C103  1    0.054380    1.072046    0.739993    11.00000    0.05295    0.05446 =
         0.05609   -0.02333   -0.01675    0.00239
PART 1
AFIX  23
H10G  2    0.074698    1.033686    0.701437    21.00000   -1.20000
H10H  2   -0.008994    1.130152    0.728004    21.00000   -1.20000
AFIX  23
PART 0
PART 2
H10I  2   -0.007490    1.130790    0.726797   -21.00000   -1.20000
H10J  2    0.075631    1.033401    0.701607   -21.00000   -1.20000
AFIX   0
PART 0
PART 1
C104  1    0.007023    0.999629    0.809583    21.00000    0.03332    0.05865 =
         0.05121   -0.02596    0.00193   -0.00511
AFIX  23
H10K  2   -0.084585    0.992863    0.814847    21.00000   -1.20000
H10L  2    0.052294    0.930028    0.813211    21.00000   -1.20000
AFIX   0
PART 0
PART 2
O200  6    0.076960    1.010156    0.860705   -21.00000    0.04372    0.09760 =
         0.04508   -0.03799   -0.00374   -0.00419
C201  1    0.174533    1.073126    0.834403   -21.00000    0.04875    0.09886 =
         0.04882   -0.04545   -0.00845   -0.01527
AFIX  23
H20A  2    0.256169    1.034288    0.842267   -21.00000   -1.20000
H20B  2    0.164034    1.133290    0.857529   -21.00000   -1.20000
AFIX   0
C204  1    0.008334    1.010419    0.798689   -21.00000    0.04173    0.06841 =
         0.05088   -0.02977   -0.01050   -0.01447
AFIX  23
H20C  2    0.013542    0.938891    0.790548   -21.00000   -1.20000
H20D  2   -0.081774    1.032365    0.811108   -21.00000   -1.20000
AFIX   0
HKLF 4


REM  GW54_0m_a.res in P-1
REM wR2 = 0.0830, GooF = S = 1.017, Restrained GooF = 1.015 for all data
REM R1 = 0.0420 for 9015 Fo > 4sig(Fo) and 0.0779 for all 12549 data
REM 584 parameters refined using 57 restraints

END

WGHT      0.0280      1.5904

REM Highest difference peak  0.294,  deepest hole -0.493,  1-sigma level  0.062
Q1    1  -0.0641  0.9010  0.6523  11.00000  0.05    0.29
Q2    1   0.7934  0.5245  0.6913  11.00000  0.05    0.29
Q3    1   0.6498  0.5589  0.8699  11.00000  0.05    0.29
Q4    1   0.3266  0.5562  0.6961  11.00000  0.05    0.28
Q5    1   0.5597  0.4111  0.7199  11.00000  0.05    0.28
Q6    1   0.7684  0.5246  0.6844  11.00000  0.05    0.28
Q7    1   0.5184  0.7228  0.7784  11.00000  0.05    0.28
Q8    1   0.1345  0.8121  0.6319  11.00000  0.05    0.27
Q9    1   0.6390  0.4473  0.7117  11.00000  0.05    0.27
Q10   1   0.1345  1.2140  0.8100  11.00000  0.05    0.26
;
_shelx_res_checksum              4934
_shelx_hkl_file                  
;
  -2   0   0 0.21720 3.53715   5
  -2   0   0 4.07485 4.67021   5
  -2   0   0 3.25040 3.38650   2
   2   0   0 2.53584 2.28634   4
   2   0   0 2.64753 4.55722   5
   2   0   0 1.57323 3.40682   5
   2   0   0 3.61833 3.49302   2
  -3   0   0 995.140 18.3778   4
  -3   0   0 955.508 22.3924   3
  -3   0   0 945.611 22.1006   5
  -3   0   0 957.443 21.0746   2
   3   0   0 952.567 21.4297   2
   3   0   0 976.401 18.5632   4
   3   0   0 925.284 21.4441   5
  -4   0   0 5680.70 97.4591   2
  -4   0   0 5715.44 99.4211   3
  -4   0   0 5543.24 93.5652   4
  -4   0   0 5746.37 99.2971   5
  -4   0   0 5523.18 98.1754   5
   4   0   0 5729.04 94.1677   4
   4   0   0 5544.59 98.3991   5
   4   0   0 5840.20 98.3950   2
  -5   0   0 62.7220 8.58004   5
  -5   0   0 54.9200 7.67626   2
  -5   0   0 45.9173 8.36460   3
  -5   0   0 49.2110 5.20075   4
  -5   0   0 44.8345 8.23728   5
   5   0   0 46.6869 8.16339   5
   5   0   0 54.3394 5.85977   4
   5   0   0 61.1496 8.29116   2
   5   0   0 71.8449 11.7156   5
  -6   0   0 528.771 21.6195   3
  -6   0   0 562.611 22.5013   3
  -6   0   0 558.268 14.9713   4
  -6   0   0 558.586 20.6053   5
  -6   0   0 548.094 19.6639   2
  -6   0   0 553.068 21.8339   5
   6   0   0 585.294 21.0093   5
   6   0   0 573.377 21.1232   2
   6   0   0 560.469 16.1268   4
  -7   0   0 385.573 18.9972   2
  -7   0   0 390.943 20.9466   3
  -7   0   0 360.045 21.8888   3
  -7   0   0 351.880 21.0485   5
  -7   0   0 381.214 19.8538   5
  -7   0   0 353.508 13.0021   4
   7   0   0 363.341 14.4093   4
   7   0   0 370.663 21.8954   2
   7   0   0 362.494 19.2155   5
   7   0   0 361.273 20.3147   5
  -8   0   0 493.709 25.2130   3
  -8   0   0 491.738 24.1991   5
  -8   0   0 441.179 25.0824   5
  -8   0   0 446.681 25.9576   3
  -8   0   0 473.684 22.9517   2
  -8   0   0 465.485 16.1184   4
   8   0   0 574.234 28.6928   5
   8   0   0 466.098 25.3167   5
   8   0   0 433.951 24.2589   2
   8   0   0 446.488 17.7854   4
  -9   0   0 48.1178 21.4220   5
  -9   0   0 34.2505 15.3907   3
  -9   0   0 43.0372 17.5610   3
  -9   0   0 36.6971 12.9300   2
  -9   0   0 31.8934 8.08691   4
  -9   0   0 40.5138 14.6460   5
   9   0   0 28.4597 12.5588   5
   9   0   0 53.4749 10.1147   4
   9   0   0 20.6721 13.1195   5
   9   0   0 41.7273 14.4630   2
 -10   0   0 179.141 30.5480   5
 -10   0   0 91.6703 19.0767   3
 -10   0   0 111.703 19.3130   5
 -10   0   0 139.730 19.2049   2
 -10   0   0 115.985 21.1572   3
 -10   0   0 154.731 15.3083   4
  10   0   0 117.640 13.6910   4
  10   0   0 112.164 17.0350   5
  10   0   0 123.287 17.1034   5
  10   0   0 115.134 19.7260   2
 -11   0   0 18.6288 10.6037   4
 -11   0   0 19.5930 19.3782   3
 -11   0   0 23.5270 21.6259   5
 -11   0   0 -1.4558 21.1878   3
 -11   0   0 9.27156 17.3134   2
 -11   0   0 31.9781 19.7570   5
  11   0   0 19.1167 21.2250   2
  11   0   0 12.2102 14.0992   4
  11   0   0 13.0839 15.4405   5
  11   0   0 31.3839 19.5940   5
 -12   0   0 29.9160 13.4250   4
 -12   0   0 20.3170 23.2101   3
 -12   0   0 28.1994 21.4576   2
 -12   0   0 -1.8258 25.8553   3
 -12   0   0 19.1869 23.0942   5
 -12   0   0 10.4473 23.8635   5
  12   0   0 27.3812 24.1524   5
  12   0   0 62.6189 17.4058   4
  12   0   0 53.1835 24.8711   5
 -13   0   0 120.454 18.5993   4
 -13   0   0 217.939 39.5482   5
 -13   0   0 131.727 31.1911   3
 -13   0   0 36.3169 37.6292   5
 -13   0   0 162.199 31.0175   2
 -13   0   0 123.987 37.7823   3
  13   0   0 138.336 29.8404   5
  13  -1   0 43.3219 30.2373   5
 -13   1   0 -30.873 28.1732   3
 -13   1   0 60.6287 36.9355   3
 -13   1   0 19.8201 26.7391   2
 -13   1   0 19.6927 25.7591   5
 -13   1   0 59.4680 34.7345   5
  12  -1   0 -5.8052 15.8704   4
  12  -1   0 35.5699 24.9755   5
  12  -1   0 -1.2859 24.4825   5
 -12   1   0 13.3038 21.0612   2
 -12   1   0 26.7697 29.1501   3
 -12   1   0 11.9347 12.0718   4
 -12   1   0 35.3998 25.9114   3
 -12   1   0 57.9438 25.4354   5
 -12   1   0 36.8307 24.3814   5
  11  -1   0 80.3264 14.9819   4
  11  -1   0 50.1166 19.3074   5
  11  -1   0 41.2716 16.5231   5
  11  -1   0 23.9522 24.0869   2
 -11   1   0 90.8005 24.3829   5
 -11   1   0 58.7579 20.6032   5
 -11   1   0 50.4397 10.7431   4
 -11   1   0 64.8425 19.1735   2
 -11   1   0 49.9008 28.9574   3
 -11   1   0 58.1968 23.6937   3
  10  -1   0 27.9499 15.4199   5
  10  -1   0 13.0898 13.6466   5
  10  -1   0 22.1091 10.9817   4
  10  -1   0 34.5360 17.4913   2
 -10   1   0 14.5347 17.4838   5
 -10   1   0 40.7300 17.1906   5
 -10   1   0 54.9002 16.5567   2
 -10   1   0 22.1522 8.29511   4
 -10   1   0 31.6407 19.3519   3
 -10   1   0 23.3742 17.8719   3
   9  -1   0 351.618 25.8375   5
   9  -1   0 377.494 27.9725   2
   9  -1   0 373.271 18.1992   4
   9  -1   0 369.680 24.8194   5
  -9   1   0 406.991 30.5766   2
  -9   1   0 363.346 26.2560   5
  -9   1   0 368.228 30.6270   3
  -9   1   0 370.760 28.6427   5
  -9   1   0 370.575 15.1098   4
  -9   1   0 321.600 28.2420   3
   8  -1   0 17.6378 7.68805   4
   8  -1   0 -3.0934 11.1605   2
   8  -1   0 -3.5934 9.55054   5
   8  -1   0 -0.8173 10.7332   5
  -8   1   0 21.5846 12.4571   5
  -8   1   0 13.5536 12.2599   3
  -8   1   0 7.78907 5.90799   4
  -8   1   0 6.25777 11.0463   5
  -8   1   0 7.78118 9.68083   2
  -8   1   0 13.7339 13.1763   3
   7  -1   0 263.607 13.2582   4
   7  -1   0 286.964 18.9336   5
   7  -1   0 285.171 17.7572   5
  -7   1   0 282.942 19.5558   5
  -7   1   0 281.152 17.7385   2
  -7   1   0 297.030 11.3438   4
  -7   1   0 305.979 20.8352   3
  -7   1   0 288.262 18.1151   5
  -7   1   0 286.581 21.9570   3
   6  -1   0 616.619 16.8623   4
   6  -1   0 633.124 21.6794   5
   6  -1   0 602.443 22.0041   5
   6  -1   0 644.161 22.8920   2
  -6   1   0 625.071 21.4052   2
  -6   1   0 645.854 15.2441   4
  -6   1   0 630.412 24.3723   3
  -6   1   0 607.111 21.5801   5
  -6   1   0 620.323 22.6411   5
   5  -1   0 74.1019 9.39334   5
   5  -1   0 50.0655 7.08311   5
   5  -1   0 56.1502 8.71248   2
   5  -1   0 67.6643 7.60489   4
  -5   1   0 69.9989 8.98608   2
  -5   1   0 77.2282 10.8412   3
  -5   1   0 61.8232 6.39229   4
  -5   1   0 72.1835 9.90344   5
  -5   1   0 63.3185 10.3584   5
   4  -1   0 51.7031 4.90063   4
   4  -1   0 57.6363 7.58596   2
   4  -1   0 43.0936 5.83559   5
   4  -1   0 41.3013 6.80679   5
  -4   1   0 45.0456 6.72054   2
  -4   1   0 46.3282 6.84489   5
  -4   1   0 58.3803 5.25733   4
  -4   1   0 57.0352 8.84055   3
  -4   1   0 38.8925 6.27984   5
   3  -1   0 2796.73 52.7202   5
   3  -1   0 2993.54 53.0861   2
   3  -1   0 2897.02 48.9588   4
   3  -1   0 2862.93 52.4109   5
  -3   1   0 2891.45 52.3347   2
  -3   1   0 2849.05 52.0655   5
  -3   1   0 2928.86 55.0469   3
  -3   1   0 2972.62 48.5808   4
  -3   1   0 2925.28 52.7328   5
   2  -1   0 702.667 16.3849   2
   2  -1   0 682.794 15.5263   5
   2  -1   0 687.202 13.3907   4
  -2   1   0 710.314 16.2267   2
  -2   1   0 692.630 15.1851   5
  -2   1   0 689.879 15.6442   5
  -2   1   0 714.809 13.2006   4
   1  -1   0 4284.07 69.6213   2
   1  -1   0 4242.21 67.9262   4
   1  -1   0 4172.08 68.5939   5
  -1   1   0 4024.58 70.2767   2
  -1   1   0 4307.93 67.9911   4
  -1   1   0 4173.69 68.6373   5
  -2  -1   0 317.740 10.0216   5
  -2  -1   0 327.183 8.67617   4
  -2  -1   0 326.686 9.52277   2
  -2  -1   0 321.629 10.4700   5
  -2  -1   0 328.434 8.81666   3
   2   1   0 317.645 9.99292   5
   2   1   0 331.497 8.60778   4
   2   1   0 315.288 10.2954   5
   2   1   0 325.361 9.51350   2
  -3  -1   0 329.038 12.6366   5
  -3  -1   0 348.738 9.78233   4
  -3  -1   0 325.521 11.1018   3
  -3  -1   0 331.516 11.2803   2
   3   1   0 337.889 9.75195   4
   3   1   0 412.674 14.8217   5
   3   1   0 341.842 11.4705   2
  -4  -1   0 594.188 16.9679   3
  -4  -1   0 588.786 14.5443   4
  -4  -1   0 583.263 16.8401   2
   4   1   0 622.316 17.5128   2
   4   1   0 702.847 21.2780   5
   4   1   0 593.300 14.8318   4
  -5  -1   0 1267.54 30.0520   3
  -5  -1   0 1324.70 26.4427   4
  -5  -1   0 1294.82 31.9649   5
  -5  -1   0 1267.54 30.8669   5
  -5  -1   0 1289.93 29.7276   2
  -5  -1   0 1293.56 30.5696   3
   5   1   0 1279.04 30.1855   2
   5   1   0 1290.88 31.1603   5
   5   1   0 1333.07 26.8481   4
  -6  -1   0 216.444 14.2248   2
  -6  -1   0 243.297 15.4166   5
  -6  -1   0 243.832 11.0237   4
  -6  -1   0 208.994 15.5871   3
  -6  -1   0 217.786 16.4455   5
  -6  -1   0 227.339 14.6819   3
   6   1   0 242.806 11.6145   4
   6   1   0 219.573 14.8824   5
   6   1   0 211.798 14.6016   2
   6   1   0 285.933 19.7948   5
  -7  -1   0 1000.26 30.5398   3
  -7  -1   0 1006.71 28.8256   2
  -7  -1   0 1007.68 30.5355   5
  -7  -1   0 1028.57 24.0559   4
  -7  -1   0 1026.89 29.9129   3
  -7  -1   0 1000.58 32.1401   5
   7   1   0 1003.80 30.5531   2
   7   1   0 1013.47 30.5666   5
   7   1   0 1008.72 31.4504   5
   7   1   0 996.715 24.8745   4
  -8  -1   0 481.634 24.2241   3
  -8  -1   0 454.175 24.7802   3
  -8  -1   0 464.930 17.0070   4
  -8  -1   0 482.141 26.1559   5
  -8  -1   0 465.424 23.9673   5
  -8  -1   0 475.634 22.5732   2
   8   1   0 512.686 25.8040   5
   8   1   0 465.609 23.5136   5
   8   1   0 501.295 18.5806   4
   8   1   0 483.710 24.4026   2
  -9  -1   0 192.005 21.2629   5
  -9  -1   0 206.427 14.4694   4
  -9  -1   0 201.390 22.8852   3
  -9  -1   0 209.182 24.8111   3
  -9  -1   0 197.335 21.3468   2
  -9  -1   0 186.053 19.3322   5
   9   1   0 176.048 21.8188   5
   9   1   0 175.171 16.3358   4
   9   1   0 207.777 23.7213   5
   9   1   0 180.133 19.0910   2
 -10  -1   0 36.6686 22.0264   5
 -10  -1   0 -0.2460 16.9812   3
 -10  -1   0 4.85225 14.4662   2
 -10  -1   0 24.0957 16.3771   3
 -10  -1   0 20.3558 16.6727   5
 -10  -1   0 20.8488 9.83787   4
  10   1   0 17.2512 16.5395   2
  10   1   0 20.1868 15.8084   5
  10   1   0 -9.0947 14.8292   5
  10   1   0 4.25937 10.8132   4
 -11  -1   0 29.9775 18.8229   3
 -11  -1   0 18.4769 21.3481   3
 -11  -1   0 14.1339 20.9845   5
 -11  -1   0 28.5358 19.8269   5
 -11  -1   0 -7.7801 16.8577   2
 -11  -1   0 31.2767 11.8800   4
  11   1   0 -2.9062 14.4076   4
  11   1   0 35.0061 18.0180   5
  11   1   0 23.1893 21.2048   5
  11   1   0 41.2745 21.9167   2
 -12  -1   0 -0.8098 13.6545   4
 -12  -1   0 -18.782 26.2086   5
 -12  -1   0 15.0295 20.7509   3
 -12  -1   0 21.0170 20.4211   2
 -12  -1   0 44.8682 26.6479   3
 -12  -1   0 14.1769 43.6484   5
  12   1   0 -8.0735 19.2561   5
  12   1   0 12.8313 17.7361   4
  12   1   0 -10.235 22.9245   5
 -13  -1   0 62.6417 28.0547   2
 -13  -1   0 62.9649 33.4064   5
 -13  -1   0 91.1444 27.3900   3
 -13  -1   0 58.4543 18.0694   4
 -13  -1   0 102.976 34.0258   3
 -13  -1   0 108.287 38.4113   5
  13   1   0 61.2570 21.3600   4
  13   1   0 93.3640 29.6505   5
  13  -2   0 21.1252 28.6478   5
 -13   2   0 49.1851 33.0853   3
 -13   2   0 -2.6051 27.1986   2
 -13   2   0 2.41532 39.5353   3
  12  -2   0 428.233 39.6540   5
  12  -2   0 485.286 26.4556   4
  12  -2   0 569.739 44.0833   5
 -12   2   0 479.685 56.4116   3
 -12   2   0 534.128 45.3212   5
 -12   2   0 444.532 48.8864   5
 -12   2   0 535.179 48.2090   3
 -12   2   0 500.104 39.0216   2
 -12   2   0 510.991 21.9190   4
  11  -2   0 143.150 14.8802   4
  11  -2   0 103.810 24.4255   5
  11  -2   0 89.3664 25.4831   2
  11  -2   0 132.172 21.1260   5
 -11   2   0 117.416 23.1810   5
 -11   2   0 214.475 30.3964   3
 -11   2   0 126.921 21.7553   2
 -11   2   0 116.307 11.0913   4
 -11   2   0 128.654 22.5617   5
 -11   2   0 119.660 25.0917   3
  10  -2   0 434.663 35.1619   2
  10  -2   0 507.742 21.3026   4
  10  -2   0 442.330 31.2108   5
  10  -2   0 489.535 31.0430   5
 -10   2   0 472.081 30.9194   2
 -10   2   0 467.893 16.6846   4
 -10   2   0 453.974 40.1038   3
 -10   2   0 449.486 35.2811   3
 -10   2   0 421.261 32.5707   5
 -10   2   0 491.013 32.7190   5
   9  -2   0 38.9555 16.1315   2
   9  -2   0 49.7332 13.9827   5
   9  -2   0 34.7524 13.7790   5
   9  -2   0 37.9480 9.69787   4
  -9   2   0 39.1049 16.7419   2
  -9   2   0 60.2872 15.4375   5
  -9   2   0 47.9189 16.4438   3
  -9   2   0 37.6521 18.9519   3
  -9   2   0 49.3277 7.61452   4
  -9   2   0 55.7219 16.6255   5
   8  -2   0 722.605 28.5664   5
   8  -2   0 688.589 20.6006   4
   8  -2   0 696.648 27.1293   5
   8  -2   0 672.749 30.1062   2
  -8   2   0 654.158 27.6319   5
  -8   2   0 680.596 34.1070   3
  -8   2   0 717.642 29.9241   5
  -8   2   0 702.296 31.6017   3
  -8   2   0 707.261 27.4283   2
  -8   2   0 709.699 17.8002   4
   7  -2   0 158.191 11.6947   4
   7  -2   0 163.127 18.0575   2
   7  -2   0 172.731 16.6841   5
   7  -2   0 165.204 15.3420   5
  -7   2   0 156.635 17.4277   5
  -7   2   0 150.972 8.87941   4
  -7   2   0 158.095 16.6561   5
  -7   2   0 181.741 21.8535   3
  -7   2   0 181.398 20.3431   3
  -7   2   0 178.484 16.7784   2
   6  -2   0 24.5365 9.24971   2
   6  -2   0 27.0092 7.55832   5
   6  -2   0 17.8936 6.35815   5
   6  -2   0 20.6280 5.83003   4
  -6   2   0 21.4828 4.49835   4
  -6   2   0 19.2763 8.24708   2
  -6   2   0 12.2775 7.90614   5
  -6   2   0 21.2239 8.44687   5
  -6   2   0 13.8991 10.3859   3
   5  -2   0 45.5180 5.64844   4
   5  -2   0 65.9579 9.29930   5
   5  -2   0 53.1723 12.1218   5
   5  -2   0 43.4792 8.63092   2
  -5   2   0 46.8326 8.24137   2
  -5   2   0 57.4186 10.7800   3
  -5   2   0 47.3540 8.04951   5
  -5   2   0 55.3384 8.61503   5
  -5   2   0 49.7582 4.60425   4
   4  -2   0 106.412 11.3734   2
   4  -2   0 127.938 9.92686   5
   4  -2   0 123.969 7.35235   4
  -4   2   0 118.999 13.2897   3
  -4   2   0 125.400 10.9563   2
  -4   2   0 118.455 6.24905   4
  -4   2   0 123.177 10.0783   5
  -4   2   0 119.862 9.38992   5
   3  -2   0 2016.13 35.2469   4
   3  -2   0 2022.47 39.9532   2
   3  -2   0 2030.14 38.2593   5
  -3   2   0 2004.86 38.4301   5
  -3   2   0 2029.81 42.7531   3
  -3   2   0 2014.71 37.8870   5
  -3   2   0 2082.76 39.6234   2
  -3   2   0 1974.42 35.1475   4
   2  -2   0 80.3318 5.11160   4
   2  -2   0 90.3943 5.87463   5
   2  -2   0 86.4367 6.05879   5
   2  -2   0 92.9406 8.54131   2
  -2   2   0 89.7433 5.96226   5
  -2   2   0 71.0364 6.25377   4
  -2   2   0 83.7210 5.74488   5
  -2   2   0 87.3257 7.82784   2
   1  -2   0 1216.29 23.4595   2
   1  -2   0 1170.08 20.6044   5
  -1   2   0 1184.60 20.5446   5
  -1   2   0 1176.46 23.1339   2
  -1   2   0 1191.91 20.7051   5
   0  -2   0 1778.82 30.5624   4
   0   2   0 1753.50 30.7403   2
   0   2   0 1746.16 30.3785   4
  -1  -2   0 4.99859 2.04142   5
  -1  -2   0 8.72433 3.14049   2
  -1  -2   0 12.8835 2.95653   4
  -1  -2   0 14.0301 2.81579   5
   1   2   0 10.8477 2.90395   5
   1   2   0 12.6410 1.96047   3
   1   2   0 10.9534 2.92283   2
   1   2   0 11.8941 2.89178   4
   1   2   0 13.3570 2.77323   5
   1   2   0 13.0215 1.92547   3
  -2  -2   0 2005.62 42.8163   5
  -2  -2   0 2285.09 40.6373   5
  -2  -2   0 2299.03 39.7398   4
  -2  -2   0 2244.50 39.6996   2
   2   2   0 2250.44 39.7288   2
   2   2   0 2283.65 40.7326   5
   2   2   0 2289.26 41.0942   5
   2   2   0 2303.06 39.6976   4
  -3  -2   0 151.773 6.75301   3
  -3  -2   0 155.367 9.01998   5
  -3  -2   0 152.151 9.97034   5
  -3  -2   0 156.116 8.86626   2
  -3  -2   0 155.378 7.81669   4
  -3  -2   0 131.032 7.28734   3
   3   2   0 151.910 8.57893   2
   3   2   0 152.206 7.66665   4
   3   2   0 161.706 9.11032   5
  -4  -2   0 916.341 21.5130   2
  -4  -2   0 868.960 20.0414   3
  -4  -2   0 892.678 19.6605   3
  -4  -2   0 894.712 19.9985   4
  -4  -2   0 878.386 23.6541   5
   4   2   0 867.478 19.8528   4
   4   2   0 901.335 22.9276   5
   4   2   0 845.696 21.1368   2
  -5  -2   0 35.4215 5.86012   4
  -5  -2   0 37.3650 7.44263   5
  -5  -2   0 39.1312 6.92890   3
  -5  -2   0 44.9809 7.24176   2
  -5  -2   0 44.7211 6.59974   3
  -5  -2   0 29.3292 7.98777   5
   5   2   0 32.3695 7.11925   2
   5   2   0 32.3767 7.93177   5
   5   2   0 37.5593 5.86588   4
   5   2   0 30.1288 6.36626   5
  -6  -2   0 410.826 16.4662   3
  -6  -2   0 395.840 20.0145   5
  -6  -2   0 398.962 14.3765   4
  -6  -2   0 378.569 17.0410   3
  -6  -2   0 401.342 16.9833   2
  -6  -2   0 410.634 18.5119   5
   6   2   0 417.689 18.9534   5
   6   2   0 415.540 18.4128   5
   6   2   0 404.941 14.6158   4
   6   2   0 412.385 17.7428   2
  -7  -2   0 3.81582 8.56892   5
  -7  -2   0 9.19666 9.38109   5
  -7  -2   0 2.96937 8.10804   3
  -7  -2   0 7.31290 6.12187   4
  -7  -2   0 11.9869 8.97015   3
  -7  -2   0 9.80036 8.44891   2
   7   2   0 2.41381 6.37755   4
   7   2   0 12.7544 9.12818   5
   7   2   0 7.86995 18.8982   5
   7   2   0 10.5589 8.51885   2
  -8  -2   0 438.835 17.3292   4
  -8  -2   0 468.210 22.1131   3
  -8  -2   0 424.349 22.8956   3
  -8  -2   0 393.771 24.9285   5
  -8  -2   0 436.895 21.7105   2
  -8  -2   0 457.276 24.0717   5
   8   2   0 481.940 25.1396   5
   8   2   0 399.918 23.0506   2
   8   2   0 414.048 18.3963   4
   8   2   0 430.938 23.4721   5
  -9  -2   0 3.81575 12.5505   3
  -9  -2   0 10.5114 12.9659   3
  -9  -2   0 10.1704 12.8123   5
  -9  -2   0 3.33179 11.8085   2
  -9  -2   0 -3.9328 8.75278   4
  -9  -2   0 12.3383 13.3397   5
   9   2   0 17.4246 9.85840   4
   9   2   0 13.8218 13.7928   5
   9   2   0 15.8321 15.0610   5
   9   2   0 7.88663 13.7341   2
 -10  -2   0 374.795 41.2947   5
 -10  -2   0 291.946 26.3501   3
 -10  -2   0 325.631 26.9953   2
 -10  -2   0 291.076 28.0208   3
 -10  -2   0 299.088 29.5555   5
 -10  -2   0 328.083 20.3142   4
  10   2   0 294.583 27.6644   5
  10   2   0 293.487 29.0926   2
  10   2   0 321.259 22.3032   4
 -11  -2   0 33.0553 23.5265   5
 -11  -2   0 32.5307 18.5977   2
 -11  -2   0 51.7006 21.1426   5
 -11  -2   0 30.1430 20.1403   3
 -11  -2   0 8.05686 16.8722   3
 -11  -2   0 47.9821 13.0964   4
  11   2   0 26.7210 21.5114   5
  11   2   0 23.6864 20.1337   5
  11   2   0 31.7226 14.8165   4
  11   2   0 36.2310 21.6455   2
 -12  -2   0 245.551 33.6104   5
 -12  -2   0 263.462 25.4292   4
 -12  -2   0 340.790 41.1605   3
 -12  -2   0 298.148 34.5693   3
 -12  -2   0 284.912 32.1757   5
 -12  -2   0 215.550 27.6627   2
  12   2   0 212.704 35.0174   5
  12   2   0 203.054 29.4617   5
  12   2   0 199.091 21.9920   4
 -13  -2   0 -19.268 18.2695   4
 -13  -2   0 -12.652 30.2475   3
 -13  -2   0 9.73436 24.7984   3
 -13  -2   0 1.91292 31.8478   5
 -13  -2   0 -7.5921 25.1327   2
 -13  -2   0 -9.1353 35.4681   5
  13   2   0 10.0248 21.2790   4
  13   2   0 16.7719 29.7371   5
  13   2   0 36.4220 21.5190   5
  13  -3   0 3.93493 30.0082   5
 -13   3   0 59.4158 35.7260   3
 -13   3   0 33.8855 27.2742   2
  12  -3   0 24.6425 24.5369   5
  12  -3   0 59.7627 23.0083   5
 -12   3   0 50.5446 23.4545   2
 -12   3   0 31.7048 24.4741   5
 -12   3   0 44.6402 29.7188   3
 -12   3   0 6.93518 27.2970   5
 -12   3   0 58.6220 35.4409   3
  11  -3   0 352.178 33.6151   5
  11  -3   0 277.663 31.3905   2
  11  -3   0 399.036 20.6635   4
  11  -3   0 425.623 36.7610   5
 -11   3   0 334.012 33.9945   2
 -11   3   0 403.866 40.3699   5
 -11   3   0 391.452 42.2630   3
 -11   3   0 353.530 47.8582   3
 -11   3   0 379.095 16.2565   4
 -11   3   0 372.349 34.9267   5
  10  -3   0 66.5398 11.1446   4
  10  -3   0 77.5117 16.9361   5
  10  -3   0 88.2261 21.2547   2
  10  -3   0 91.1897 17.7727   5
 -10   3   0 80.2152 8.13690   4
 -10   3   0 80.0549 22.4373   3
 -10   3   0 54.5035 23.6338   3
 -10   3   0 80.6573 18.4489   5
 -10   3   0 75.3343 18.5426   2
 -10   3   0 88.3951 20.8035   5
   9  -3   0 249.580 22.7312   5
   9  -3   0 280.981 15.5183   4
   9  -3   0 276.061 24.4371   5
   9  -3   0 196.507 21.3219   2
  -9   3   0 262.956 34.0513   3
  -9   3   0 248.111 24.7403   2
  -9   3   0 318.789 29.7566   3
  -9   3   0 224.244 26.1504   5
  -9   3   0 258.840 25.6197   5
  -9   3   0 258.360 12.0313   4
   8  -3   0 56.9827 8.54099   4
   8  -3   0 64.0005 13.8799   5
   8  -3   0 67.9182 15.2344   2
   8  -3   0 64.6055 13.1681   5
  -8   3   0 69.8970 13.2157   2
  -8   3   0 35.1294 13.5625   5
  -8   3   0 56.6614 15.0918   3
  -8   3   0 42.5504 13.2035   5
  -8   3   0 59.0081 18.1311   3
  -8   3   0 79.7994 8.73066   4
   7  -3   0 1594.36 43.3245   2
   7  -3   0 1623.18 32.5754   4
   7  -3   0 1643.53 40.9783   5
  -7   3   0 1628.70 46.8373   3
  -7   3   0 1610.48 40.8254   2
  -7   3   0 1619.79 30.4879   4
  -7   3   0 1634.84 40.1752   5
   6  -3   0 135.574 9.74676   4
   6  -3   0 132.645 13.2847   2
   6  -3   0 130.537 13.8468   5
  -6   3   0 153.227 13.8656   5
  -6   3   0 142.715 14.6647   2
  -6   3   0 129.929 17.8493   3
  -6   3   0 144.998 7.59070   4
  -6   3   0 137.495 13.3654   5
   5  -3   0 240.421 10.0067   4
   5  -3   0 255.710 15.9111   2
   5  -3   0 252.401 13.8570   5
  -5   3   0 236.612 14.9232   2
  -5   3   0 252.438 13.8428   5
  -5   3   0 258.292 8.86951   4
  -5   3   0 246.974 13.0865   5
  -5   3   0 232.852 18.4551   3
   4  -3   0 1.77996 4.05543   4
   4  -3   0 -7.8696 6.17052   2
   4  -3   0 0.66672 5.24821   5
   4  -3   0 -0.7931 4.69455   5
  -4   3   0 -3.7208 5.49276   5
  -4   3   0 1.24850 7.11978   3
  -4   3   0 1.85944 3.62941   4
  -4   3   0 8.26431 6.47622   2
  -4   3   0 3.29645 4.98858   5
   3  -3   0 1574.35 33.9552   2
   3  -3   0 1597.63 28.7647   4
   3  -3   0 1575.78 30.8326   5
  -3   3   0 1581.77 36.9579   3
  -3   3   0 1590.21 33.2365   2
  -3   3   0 1565.88 30.5949   5
  -3   3   0 1556.61 31.0875   5
  -3   3   0 1562.84 28.8281   4
   2  -3   0 4166.31 69.2904   5
   2  -3   0 4147.69 72.9873   2
   2  -3   0 4103.82 69.2793   5
  -2   3   0 4148.30 72.5575   2
  -2   3   0 4165.84 69.2893   5
  -2   3   0 4189.94 69.5733   4
  -2   3   0 4099.41 69.5548   5
  -1   3   0 1136.60 23.7935   2
   0   3   0 2024.57 36.4800   2
   0   3   0 2037.19 35.9417   4
  -1  -3   0 1399.03 24.9095   5
  -1  -3   0 1357.46 26.0202   2
  -1  -3   0 1289.85 25.7850   5
  -1  -3   0 1360.54 26.2789   4
   1   3   0 1388.33 26.1236   4
   1   3   0 1380.20 25.2605   5
   1   3   0 1375.35 25.7822   2
   1   3   0 1399.16 25.0888   5
   1   3   0 1388.41 25.1848   3
  -2  -3   0 523.029 13.7881   4
  -2  -3   0 523.021 13.6092   5
  -2  -3   0 542.419 13.8278   2
   2   3   0 545.923 13.4957   2
   2   3   0 535.757 13.7732   4
   2   3   0 530.801 13.8256   5
   2   3   0 537.667 14.2925   5
  -3  -3   0 122.729 8.86660   2
  -3  -3   0 116.453 8.07535   4
  -3  -3   0 129.088 8.67952   5
  -3  -3   0 142.170 9.87091   5
   3   3   0 133.979 8.85924   5
   3   3   0 125.791 8.35611   2
   3   3   0 120.850 9.26532   5
   3   3   0 134.758 8.08950   4
  -4  -3   0 95.7572 10.8873   5
  -4  -3   0 116.320 8.86232   4
  -4  -3   0 106.868 9.60926   2
  -4  -3   0 118.595 10.1641   5
  -4  -3   0 98.8593 6.71522   3
   4   3   0 112.966 10.5748   5
   4   3   0 87.1510 9.68077   5
   4   3   0 112.727 9.52612   2
   4   3   0 110.991 8.55401   4
  -5  -3   0 2402.82 49.8652   5
  -5  -3   0 2439.74 45.2035   3
  -5  -3   0 2457.32 46.6856   4
  -5  -3   0 2477.48 51.5001   5
  -5  -3   0 2502.00 44.4941   3
  -5  -3   0 2444.28 48.3309   2
   5   3   0 2430.13 48.2723   2
   5   3   0 2453.36 50.5155   5
   5   3   0 2398.91 46.4574   4
   5   3   0 2470.57 50.7936   5
  -6  -3   0 34.3934 6.64389   4
  -6  -3   0 47.1509 7.05570   3
  -6  -3   0 38.2510 7.44185   3
  -6  -3   0 48.1981 9.61759   5
  -6  -3   0 38.0313 8.30981   2
  -6  -3   0 39.2116 9.84090   5
   6   3   0 32.7024 8.35854   2
   6   3   0 30.9889 7.58096   5
   6   3   0 39.5906 6.90300   4
   6   3   0 44.3307 9.47154   5
  -7  -3   0 9.35683 8.36463   3
  -7  -3   0 17.1504 7.88554   3
  -7  -3   0 30.6577 10.1559   5
  -7  -3   0 5.90816 8.64711   2
  -7  -3   0 1.12000 9.69917   5
  -7  -3   0 24.7770 7.44582   4
   7   3   0 0.15326 10.1695   2
   7   3   0 20.6835 10.2074   5
   7   3   0 8.40208 9.69426   5
   7   3   0 17.2165 7.19338   4
  -8  -3   0 12.6067 11.0652   5
  -8  -3   0 28.1714 10.1027   3
  -8  -3   0 36.8253 11.3871   2
  -8  -3   0 21.7082 9.68473   3
  -8  -3   0 14.4322 8.66312   4
  -8  -3   0 5.25898 11.7894   5
   8   3   0 13.8949 10.6860   2
   8   3   0 30.0418 8.93445   4
   8   3   0 18.4880 9.87272   5
   8   3   0 14.9648 10.9307   5
  -9  -3   0 494.157 23.4187   3
  -9  -3   0 477.370 28.0984   5
  -9  -3   0 438.106 29.5016   5
  -9  -3   0 498.661 26.7930   2
  -9  -3   0 473.091 21.5929   4
  -9  -3   0 480.664 24.6744   3
   9   3   0 477.748 24.2457   4
   9   3   0 514.843 29.4795   5
   9   3   0 546.995 33.7548   5
   9   3   0 468.579 27.6721   2
 -10  -3   0 18.6273 15.8329   2
 -10  -3   0 -14.388 12.5645   3
 -10  -3   0 4.34550 18.2051   5
 -10  -3   0 -5.0566 15.8733   5
 -10  -3   0 -3.5519 10.7011   4
 -10  -3   0 -19.714 14.4433   3
  10   3   0 1.00858 16.4729   2
  10   3   0 4.24596 15.0266   5
  10   3   0 6.53503 11.9499   4
  10   3   0 11.9429 14.6759   5
 -11  -3   0 89.9135 15.1820   4
 -11  -3   0 94.3282 18.6657   3
 -11  -3   0 114.662 24.4884   5
 -11  -3   0 100.799 21.1608   3
 -11  -3   0 86.7990 22.3325   5
 -11  -3   0 96.0832 20.9999   2
  11   3   0 141.252 25.0018   2
  11   3   0 88.5470 23.3746   5
  11   3   0 148.532 23.5724   5
  11   3   0 114.963 17.5039   4
 -12  -3   0 193.690 26.8448   3
 -12  -3   0 212.699 29.6186   5
 -12  -3   0 153.283 22.8950   3
 -12  -3   0 173.679 19.3256   4
 -12  -3   0 139.227 26.5582   2
 -12  -3   0 167.467 32.9245   5
  12   3   0 205.704 30.4219   5
  12   3   0 153.814 24.3862   5
  12   3   0 147.281 20.9299   4
 -13  -3   0 320.670 62.3271   5
 -13  -3   0 300.918 46.0478   5
 -13  -3   0 357.024 34.1450   4
 -13  -3   0 368.933 43.3568   3
 -13  -3   0 307.775 37.9733   3
 -13  -3   0 342.285 35.1538   2
  13   3   0 325.537 37.4355   5
  13   3   0 369.453 40.5048   4
  13   3   0 296.158 36.8751   5
  13  -4   0 78.0613 28.9869   5
 -13   4   0 48.8183 37.8205   3
  12  -4   0 45.8288 23.4074   5
 -12   4   0 -7.9698 24.5991   5
 -12   4   0 51.9051 30.6412   3
 -12   4   0 25.8732 23.9767   2
  11  -4   0 44.8473 19.5948   5
  11  -4   0 65.5456 23.1827   5
  11  -4   0 51.2886 25.0233   2
 -11   4   0 19.9462 20.0374   2
 -11   4   0 30.1133 25.5687   5
 -11   4   0 50.7980 26.5144   3
 -11   4   0 86.8810 26.0444   5
 -11   4   0 27.4333 29.7681   3
  10  -4   0 34.0123 17.5817   5
  10  -4   0 62.8358 22.8155   2
 -10   4   0 73.3325 26.3488   3
 -10   4   0 62.9871 22.9684   3
 -10   4   0 44.7030 19.1707   2
 -10   4   0 48.7389 20.4301   5
 -10   4   0 57.5207 20.3855   5
   9  -4   0 256.955 25.1218   5
   9  -4   0 265.329 25.9201   2
   9  -4   0 228.595 14.4528   4
  -9   4   0 240.965 25.9618   5
  -9   4   0 235.381 25.6425   2
  -9   4   0 214.912 30.6889   3
  -9   4   0 220.667 24.9150   5
  -9   4   0 217.796 10.8753   4
  -9   4   0 206.460 26.3885   3
   8  -4   0 45.6008 15.3166   2
   8  -4   0 35.0674 11.7156   5
   8  -4   0 31.2554 7.61067   4
   8  -4   0 13.1742 9.06887   5
  -8   4   0 45.4918 15.7581   3
  -8   4   0 65.0575 14.0498   2
  -8   4   0 30.8545 12.3316   5
  -8   4   0 38.1419 14.1564   5
  -8   4   0 37.5635 5.55047   4
  -8   4   0 28.9612 18.2733   3
   7  -4   0 24.1853 9.86780   5
   7  -4   0 39.1506 12.7780   2
   7  -4   0 19.2401 11.0705   5
   7  -4   0 36.3620 6.52550   4
  -7   4   0 8.83839 12.7248   3
  -7   4   0 11.0614 13.9862   3
  -7   4   0 20.8702 10.1410   5
  -7   4   0 43.7041 10.8705   2
  -7   4   0 34.3662 5.21301   4
  -7   4   0 23.8125 10.3403   5
   6  -4   0 530.687 24.4029   2
   6  -4   0 451.907 24.2178   5
   6  -4   0 510.379 19.7620   5
   6  -4   0 476.516 14.2786   4
  -6   4   0 514.686 13.1538   4
  -6   4   0 528.111 27.1963   3
  -6   4   0 505.126 20.6044   5
  -6   4   0 494.436 19.5134   5
  -6   4   0 504.014 21.8092   2
   5  -4   0 268.426 13.8362   5
   5  -4   0 242.226 17.1246   2
   5  -4   0 260.716 10.3299   4
   5  -4   0 268.363 13.7414   5
  -5   4   0 245.791 19.9117   3
  -5   4   0 255.500 13.4751   5
  -5   4   0 258.383 9.83173   4
  -5   4   0 250.405 13.5791   5
  -5   4   0 265.207 16.0112   2
   4  -4   0 1664.93 33.9815   5
   4  -4   0 1661.66 33.8003   5
   4  -4   0 1646.30 38.2372   2
  -4   4   0 1627.12 33.6077   5
  -4   4   0 1617.15 31.0456   4
  -4   4   0 1676.73 37.2289   2
  -4   4   0 1651.98 42.0348   3
  -4   4   0 1654.57 34.4395   5
   3  -4   0 596.893 19.6717   2
   3  -4   0 617.153 15.4725   5
   3  -4   0 612.342 15.2053   5
  -3   4   0 599.350 22.4720   3
  -3   4   0 607.937 19.0184   2
  -3   4   0 595.296 15.6533   5
  -3   4   0 611.820 15.3103   4
  -3   4   0 621.892 15.3399   5
   2  -4   0 92.2918 5.77557   5
   2  -4   0 103.029 10.6402   2
   2  -4   0 82.2350 5.17113   5
  -2   4   0 92.8956 11.5914   3
  -2   4   0 92.7710 9.57008   2
  -2   4   0 89.0106 5.57400   5
  -2   4   0 88.0058 5.49819   5
  -2   4   0 84.3620 7.34245   4
  -1   4   0 8013.30 132.272   2
  -1   4   0 7803.85 134.852   3
  -1   4   0 7859.15 129.611   4
   0   4   0 685.484 18.3408   3
   0   4   0 682.890 15.8483   4
   0   4   0 688.545 16.7106   2
  -1  -4   0 2174.21 40.3987   2
  -1  -4   0 2244.36 40.7141   4
  -1  -4   0 2193.90 38.6733   5
  -1  -4   0 2159.42 37.9856   5
   1   4   0 2184.76 39.8323   2
   1   4   0 2172.04 40.1239   4
   1   4   0 2189.30 38.3959   5
   1   4   0 2227.13 38.6837   5
   1   4   0 2209.74 39.8059   3
  -2  -4   0 613.974 16.0606   5
  -2  -4   0 629.661 16.0825   2
  -2  -4   0 639.428 15.4049   5
  -2  -4   0 599.795 16.1720   4
   2   4   0 630.686 16.1682   4
   2   4   0 609.700 12.7187   3
   2   4   0 641.343 16.0044   5
   2   4   0 641.505 12.4103   3
   2   4   0 643.415 15.7465   5
   2   4   0 633.041 15.8034   2
  -3  -4   0 197.422 10.3042   4
  -3  -4   0 195.353 10.2465   2
  -3  -4   0 208.340 10.2345   5
   3   4   0 198.621 10.1637   2
   3   4   0 172.818 10.3446   5
   3   4   0 197.391 10.3027   5
   3   4   0 195.575 9.84279   4
  -4  -4   0 2079.19 41.1488   4
  -4  -4   0 2112.97 41.4902   2
  -4  -4   0 2039.29 42.3347   5
  -4  -4   0 2030.82 43.5454   5
   4   4   0 2110.06 43.0754   5
   4   4   0 2079.33 43.2809   5
   4   4   0 2170.58 41.1380   4
   4   4   0 2089.54 41.1006   2
  -5  -4   0 869.983 23.3700   2
  -5  -4   0 862.103 22.4143   4
  -5  -4   0 858.568 26.1533   5
  -5  -4   0 824.936 24.1632   5
   5   4   0 820.348 21.8213   4
   5   4   0 841.108 24.5867   5
   5   4   0 850.081 25.2314   5
   5   4   0 795.621 22.8548   2
  -6  -4   0 -2.8562 5.40767   3
  -6  -4   0 12.3190 5.08886   3
  -6  -4   0 -4.0672 7.63633   2
  -6  -4   0 -9.4752 9.15475   5
  -6  -4   0 5.02272 8.20719   5
  -6  -4   0 -4.1300 6.29143   4
   6   4   0 -2.2804 8.19011   5
   6   4   0 0.76759 8.09420   5
   6   4   0 8.17300 6.54598   4
   6   4   0 12.1430 7.52311   2
  -7  -4   0 0.04122 9.12435   2
  -7  -4   0 -0.9195 6.63270   3
  -7  -4   0 -4.2655 8.72071   5
  -7  -4   0 1.95112 6.50422   3
  -7  -4   0 7.76819 7.32984   4
  -7  -4   0 0.51192 10.4657   5
   7   4   0 2.15871 10.1169   5
   7   4   0 6.56678 7.38576   4
   7   4   0 -4.1256 9.24801   5
  -8  -4   0 63.3568 12.8992   2
  -8  -4   0 56.6447 14.4011   5
  -8  -4   0 70.1402 11.0452   4
  -8  -4   0 54.0996 13.4631   5
  -8  -4   0 78.9574 10.8793   3
  -8  -4   0 75.5881 9.84649   3
   8   4   0 75.5791 15.5618   5
   8   4   0 53.1448 12.8934   2
   8   4   0 67.8725 12.7177   4
   8   4   0 111.475 18.9334   5
  -9  -4   0 57.8445 11.9181   3
  -9  -4   0 66.4099 11.9572   4
  -9  -4   0 88.0290 21.9758   5
  -9  -4   0 28.2693 20.4891   5
  -9  -4   0 71.4719 11.4422   3
  -9  -4   0 53.2936 15.1415   2
   9   4   0 65.0505 14.1764   5
   9   4   0 69.6227 12.6394   4
   9   4   0 51.0963 12.2580   5
   9   4   0 35.6072 14.2077   2
 -10  -4   0 31.9469 12.1451   3
 -10  -4   0 40.1484 16.8951   2
 -10  -4   0 63.1433 13.2892   4
 -10  -4   0 72.1024 21.9580   5
 -10  -4   0 77.9502 18.7927   5
 -10  -4   0 54.8870 13.9007   3
  10   4   0 60.4155 17.5513   5
  10   4   0 37.0368 16.7976   2
  10   4   0 54.9992 13.9402   4
  10   4   0 54.9072 20.2654   5
 -11  -4   0 101.057 23.0774   5
 -11  -4   0 91.3680 21.2439   2
 -11  -4   0 121.172 23.7060   5
 -11  -4   0 113.125 16.1563   3
 -11  -4   0 126.369 19.4828   3
 -11  -4   0 109.341 17.0205   4
  11   4   0 179.816 28.9055   5
  11   4   0 80.5590 24.4516   2
  11   4   0 60.8167 18.7906   5
  11   4   0 121.880 18.1505   4
 -12  -4   0 548.565 37.1526   3
 -12  -4   0 518.152 32.8342   4
 -12  -4   0 479.756 50.7648   5
 -12  -4   0 610.368 54.0560   5
 -12  -4   0 466.707 30.5651   3
 -12  -4   0 520.791 40.2421   2
  12   4   0 507.879 35.9133   4
  12   4   0 506.837 44.5311   5
 -13  -4   0 44.2575 34.7566   5
 -13  -4   0 8.92608 20.5566   3
 -13  -4   0 2.98964 20.9298   4
 -13  -4   0 -30.381 25.6242   2
 -13  -4   0 -13.882 35.8183   5
  13   4   0 8.40883 31.3148   5
  13   4   0 1.69436 25.2131   5
  13   4   0 -30.719 23.1621   4
  12  -5   0 124.100 29.6068   5
 -12   5   0 138.428 26.9852   2
 -12   5   0 110.182 34.9779   3
  11  -5   0 -22.619 21.9099   5
  11  -5   0 4.92942 20.2571   5
 -11   5   0 12.0150 24.1760   5
 -11   5   0 -22.743 24.3853   5
 -11   5   0 56.3134 21.0479   2
 -11   5   0 -0.6878 27.2491   3
 -11   5   0 -26.227 31.5402   3
  10  -5   0 431.036 32.3881   5
  10  -5   0 343.517 33.5803   2
  10  -5   0 363.080 41.4116   5
 -10   5   0 441.528 35.3951   5
 -10   5   0 347.483 33.1657   2
 -10   5   0 348.123 36.9777   3
 -10   5   0 428.793 42.7791   3
 -10   5   0 433.964 33.3079   5
   9  -5   0 233.989 23.8682   5
   9  -5   0 239.651 25.3397   5
   9  -5   0 228.750 25.7755   2
  -9   5   0 291.047 33.6062   3
  -9   5   0 258.505 30.6265   3
  -9   5   0 222.089 26.0271   5
  -9   5   0 287.545 28.5998   2
  -9   5   0 232.264 26.1851   5
   8  -5   0 515.673 25.3031   5
   8  -5   0 575.136 32.7263   2
  -8   5   0 456.959 34.0297   3
  -8   5   0 458.311 25.1968   5
  -8   5   0 524.283 26.8798   5
  -8   5   0 507.533 13.3653   4
  -8   5   0 489.908 27.6960   2
  -8   5   0 553.535 37.4517   3
   7  -5   0 33.8767 10.4791   5
   7  -5   0 43.2002 11.6956   5
   7  -5   0 44.9101 14.4613   2
  -7   5   0 39.2025 16.1757   3
  -7   5   0 29.2907 10.6361   5
  -7   5   0 48.9198 12.3261   2
  -7   5   0 30.0276 11.3371   5
  -7   5   0 25.5840 14.1440   3
  -7   5   0 43.7830 5.70824   4
   6  -5   0 10.9638 7.88458   5
   6  -5   0 5.39536 7.22789   5
  -6   5   0 6.04047 8.52951   5
  -6   5   0 -4.9766 12.0197   3
  -6   5   0 16.6719 5.32642   4
  -6   5   0 -0.4776 9.59173   2
  -6   5   0 21.7355 12.2715   3
  -6   5   0 6.61508 7.67368   5
   5  -5   0 227.595 13.4252   5
   5  -5   0 224.538 18.6119   2
   5  -5   0 215.180 12.7509   5
  -5   5   0 219.572 13.5909   5
  -5   5   0 209.122 20.3461   3
  -5   5   0 220.019 13.0428   5
  -5   5   0 213.961 16.6330   2
  -5   5   0 234.236 10.5366   4
   4  -5   0 421.383 14.3904   5
   4  -5   0 450.305 14.3431   5
   4  -5   0 426.719 19.6307   2
  -4   5   0 428.187 14.7214   5
  -4   5   0 433.021 22.5799   3
  -4   5   0 419.991 13.5987   4
  -4   5   0 439.882 18.2541   2
  -4   5   0 441.829 14.4872   5
   3  -5   0 186.585 8.88718   5
   3  -5   0 187.374 14.6110   2
   3  -5   0 187.471 8.50663   5
  -3   5   0 184.842 16.3045   3
  -3   5   0 201.566 13.4493   2
  -3   5   0 185.200 10.2848   4
  -3   5   0 205.760 8.90639   5
  -3   5   0 200.397 9.19259   5
  -2   5   0 535.953 20.8526   3
  -2   5   0 550.016 14.1910   4
  -2   5   0 543.358 15.2393   4
  -2   5   0 522.305 17.8434   2
  -2   5   0 537.333 12.1273   5
  -2   5   0 528.208 12.0383   5
  -1   5   0 883.114 19.8668   4
  -1   5   0 909.731 22.7414   2
  -1   5   0 899.594 25.0591   3
   0   5   0 2.99828 4.19174   4
   0   5   0 6.25750 5.63348   3
   0   5   0 1.88999 4.95845   2
  -1  -5   0 3780.90 64.5183   5
  -1  -5   0 3942.37 68.5593   4
  -1  -5   0 3913.74 65.4040   5
  -1  -5   0 3875.00 68.3263   2
   1   5   0 3851.95 67.4496   2
   1   5   0 3847.53 65.2851   5
   1   5   0 3847.22 67.8383   3
   1   5   0 3885.73 65.3538   5
   1   5   0 3882.62 68.1511   3
   1   5   0 3805.07 67.6899   4
  -2  -5   0 9.28107 5.40762   2
  -2  -5   0 7.61720 4.13552   5
  -2  -5   0 8.87920 5.19839   5
  -2  -5   0 12.0921 5.35699   4
   2   5   0 10.1268 3.73794   3
   2   5   0 -0.0852 4.56256   4
   2   5   0 6.87714 4.32090   5
   2   5   0 9.36937 5.05387   2
   2   5   0 3.63634 4.35474   5
   2   5   0 6.71313 3.91611   3
  -3  -5   0 425.751 15.0194   2
  -3  -5   0 413.926 14.8721   4
  -3  -5   0 384.030 14.9698   5
  -3  -5   0 394.391 13.7540   5
   3   5   0 410.518 14.2862   5
   3   5   0 427.592 14.7911   5
   3   5   0 420.378 14.5204   4
   3   5   0 410.822 14.0888   2
  -4  -5   0 -0.6287 5.76701   4
  -4  -5   0 2.44182 5.92517   5
  -4  -5   0 10.3431 6.72252   2
   4   5   0 7.08420 5.25913   4
   4   5   0 12.3084 6.27715   2
   4   5   0 -0.2867 5.42657   5
   4   5   0 9.72832 6.34191   5
  -5  -5   0 524.346 19.8047   5
  -5  -5   0 558.597 18.6972   4
  -5  -5   0 532.682 19.3602   2
  -5  -5   0 486.266 20.6059   5
   5   5   0 552.001 20.0045   5
   5   5   0 562.548 21.0107   5
   5   5   0 522.975 17.7870   4
   5   5   0 517.883 18.5664   2
  -6  -5   0 51.0072 10.2991   5
  -6  -5   0 44.8033 11.1481   5
  -6  -5   0 69.6784 10.6251   2
  -6  -5   0 51.7726 9.32726   4
   6   5   0 60.1550 11.9473   5
   6   5   0 50.3405 9.10448   2
   6   5   0 48.1449 9.37713   5
   6   5   0 53.7269 8.36838   4
  -7  -5   0 580.343 22.0426   4
  -7  -5   0 587.594 25.1362   5
  -7  -5   0 586.048 23.7717   2
  -7  -5   0 536.555 26.4567   5
   7   5   0 499.105 24.3069   4
   7   5   0 547.262 24.6096   5
   7   5   0 544.319 23.0436   2
   7   5   0 550.290 25.3463   5
  -8  -5   0 73.2753 13.8336   2
  -8  -5   0 86.4766 10.7568   3
  -8  -5   0 76.4369 12.3785   4
  -8  -5   0 67.5278 14.2841   5
  -8  -5   0 76.8407 9.26018   3
  -8  -5   0 77.8012 16.6137   5
   8   5   0 71.0953 15.8297   5
   8   5   0 86.2211 12.3240   4
   8   5   0 75.1722 14.4797   2
   8   5   0 79.9967 14.9548   5
  -9  -5   0 247.798 28.1860   5
  -9  -5   0 283.883 17.6415   3
  -9  -5   0 274.791 21.3189   4
  -9  -5   0 261.487 26.3131   5
  -9  -5   0 243.809 15.5436   3
   9   5   0 271.120 25.2784   5
   9   5   0 271.768 26.9997   5
   9   5   0 285.897 25.4911   2
   9   5   0 281.921 21.5391   4
 -10  -5   0 -6.3557 10.2715   3
 -10  -5   0 -12.191 15.4370   2
 -10  -5   0 0.90301 11.6142   3
 -10  -5   0 14.4941 12.9983   4
 -10  -5   0 3.94635 20.6583   5
 -10  -5   0 -20.170 15.2193   5
  10   5   0 1.74966 15.6174   2
  10   5   0 25.7688 16.8701   5
  10   5   0 -7.8853 14.8346   5
  10   5   0 -2.2646 13.0575   4
 -11  -5   0 75.7297 15.7084   3
 -11  -5   0 48.3754 13.1131   3
 -11  -5   0 108.488 28.7188   5
 -11  -5   0 52.7540 21.3971   2
 -11  -5   0 34.4204 16.1361   4
 -11  -5   0 96.1794 25.6236   5
  11   5   0 46.1373 23.8193   5
  11   5   0 58.4851 26.4977   5
  11   5   0 12.7410 21.2608   2
  11   5   0 46.8759 16.5063   4
 -12  -5   0 135.026 36.5517   5
 -12  -5   0 64.7314 24.8662   5
 -12  -5   0 110.494 26.4635   2
 -12  -5   0 116.128 20.9820   4
 -12  -5   0 77.9065 15.9299   3
  12   5   0 142.323 29.1778   5
  12   5   0 132.557 29.1757   5
  12   5   0 91.9478 22.5344   4
 -13  -5   0 130.709 26.1234   4
 -13  -5   0 127.311 32.3052   5
 -13  -5   0 154.498 32.5451   2
  13   5   0 191.887 41.7471   5
  13   5   0 156.845 31.1179   5
  13   5   0 137.101 28.6320   4
  12  -6   0 31.8455 27.4557   5
 -12   6   0 6.25210 25.4989   2
 -12   6   0 62.8506 37.4191   3
  11  -6   0 97.9742 22.1822   5
  11  -6   0 39.5090 20.5866   5
 -11   6   0 92.3346 25.4593   2
 -11   6   0 54.1226 30.0233   3
 -11   6   0 86.4299 28.2086   5
  10  -6   0 -25.115 24.8842   2
  10  -6   0 -15.260 18.3229   5
  10  -6   0 -10.717 16.4429   5
 -10   6   0 31.4867 25.2800   3
 -10   6   0 6.94006 18.2268   2
 -10   6   0 -14.771 21.1105   5
 -10   6   0 -5.4823 30.4771   3
 -10   6   0 2.47667 20.4860   5
   9  -6   0 270.146 28.3894   2
   9  -6   0 238.577 24.0241   5
   9  -6   0 249.202 25.9887   5
  -9   6   0 277.135 29.0043   2
  -9   6   0 225.998 32.1737   3
  -9   6   0 218.294 27.0654   5
  -9   6   0 233.569 26.8115   5
  -9   6   0 289.453 31.5427   3
   8  -6   0 8.45998 12.1904   5
   8  -6   0 16.6457 11.9586   5
   8  -6   0 3.27330 17.3130   2
  -8   6   0 -2.2442 19.1152   3
  -8   6   0 3.90616 11.6876   5
  -8   6   0 -4.7519 13.6319   2
  -8   6   0 22.8272 18.9751   3
  -8   6   0 23.2292 13.7472   5
   7  -6   0 13.2710 9.83410   5
   7  -6   0 7.30636 9.48111   5
   7  -6   0 1.78610 14.1928   2
  -7   6   0 -14.691 15.0385   3
  -7   6   0 13.5324 12.8603   2
  -7   6   0 -0.3034 10.8436   5
  -7   6   0 13.4019 5.82189   4
  -7   6   0 15.5700 15.5194   3
  -7   6   0 7.58388 10.5266   5
   6  -6   0 165.988 18.0367   2
   6  -6   0 170.225 14.4791   5
   6  -6   0 162.435 14.9398   5
  -6   6   0 179.042 18.9669   2
  -6   6   0 197.483 22.3649   3
  -6   6   0 168.710 10.8764   4
  -6   6   0 147.040 18.4431   3
  -6   6   0 150.694 14.7382   5
  -6   6   0 155.731 15.0777   5
   5  -6   0 28.1372 7.50987   5
   5  -6   0 35.2502 12.0610   2
   5  -6   0 20.7550 7.86887   5
  -5   6   0 20.7301 7.39688   5
  -5   6   0 11.3672 7.24629   5
  -5   6   0 16.4578 6.39885   4
  -5   6   0 16.2930 13.2874   3
  -5   6   0 10.7543 10.9960   3
  -5   6   0 14.6575 9.45109   2
   4  -6   0 8.59294 9.38972   2
   4  -6   0 9.80300 5.71609   5
   4  -6   0 8.66106 5.19442   5
  -4   6   0 13.2116 5.68427   5
  -4   6   0 5.44832 5.84378   4
  -4   6   0 8.75978 8.46421   2
  -4   6   0 9.58975 10.4399   3
  -4   6   0 12.6887 5.69225   5
   3  -6   0 50.8190 5.22589   5
   3  -6   0 38.1402 5.11486   5
  -3   6   0 43.5153 5.34537   5
  -3   6   0 48.8792 10.6851   3
  -3   6   0 40.7719 8.80838   2
  -3   6   0 45.2386 5.40124   5
  -3   6   0 51.3770 5.87076   4
  -3   6   0 44.8077 6.98763   4
  -2   6   0 42.5680 5.86444   4
  -2   6   0 38.9740 6.84728   4
  -2   6   0 39.3116 7.99911   2
  -2   6   0 30.2595 9.15345   3
  -1   6   0 537.680 15.2887   4
  -1   6   0 507.603 17.7054   2
  -1   6   0 538.461 20.6418   3
  -1   6   0 529.729 18.4586   2
   0   6   0 42.9918 6.18622   4
   0   6   0 38.1800 7.97690   3
   0   6   0 40.5701 6.95967   2
  -1  -6   0 52.7259 5.46133   5
  -1  -6   0 56.7721 7.93277   2
  -1  -6   0 53.0840 5.40790   5
   1   6   0 52.2394 7.35297   3
   1   6   0 56.4948 5.28919   5
   1   6   0 57.3784 7.09106   2
   1   6   0 58.9014 6.05794   5
   1   6   0 61.6107 7.49028   3
   1   6   0 46.3723 6.26358   4
  -2  -6   0 481.567 14.7983   5
  -2  -6   0 458.146 16.3969   4
  -2  -6   0 452.704 13.4297   5
  -2  -6   0 474.094 16.5134   2
   2   6   0 453.270 13.9740   3
   2   6   0 472.976 14.1801   5
   2   6   0 440.359 15.1841   2
   2   6   0 474.761 15.6766   4
   2   6   0 470.097 13.4293   3
   2   6   0 486.923 14.0878   5
  -3  -6   0 133.652 11.7866   5
  -3  -6   0 130.237 9.91069   5
  -3  -6   0 136.498 11.6835   2
  -3  -6   0 137.015 11.4318   4
   3   6   0 135.082 11.0073   2
   3   6   0 144.913 10.0535   5
   3   6   0 128.934 10.5147   5
   3   6   0 149.220 10.9455   4
  -4  -6   0 -3.1026 6.28260   5
  -4  -6   0 4.81072 8.10312   5
  -4  -6   0 -6.3063 5.80718   4
  -4  -6   0 -7.9587 6.74183   2
   4   6   0 5.00538 6.46518   2
   4   6   0 1.72280 6.45885   5
   4   6   0 3.40684 7.30465   5
   4   6   0 5.68243 5.61459   4
  -5  -6   0 -1.2733 7.27897   4
  -5  -6   0 -1.3929 7.83283   2
  -5  -6   0 -2.8441 7.50497   5
   5   6   0 7.38225 6.91950   2
   5   6   0 6.98268 6.77834   4
   5   6   0 9.62290 6.82037   5
   5   6   0 5.55595 7.14343   5
  -6  -6   0 55.3055 9.91149   4
  -6  -6   0 47.2582 10.3153   2
  -6  -6   0 57.1984 10.9351   5
  -6  -6   0 42.3095 11.1525   5
   6   6   0 67.8157 11.6668   5
   6   6   0 72.9092 10.7808   2
  -7  -6   0 336.583 19.4036   4
  -7  -6   0 306.988 23.3436   5
  -7  -6   0 357.310 21.4900   2
  -7  -6   0 324.095 21.7346   5
   7   6   0 362.533 22.9983   5
   7   6   0 321.640 22.2769   5
   7   6   0 320.576 19.2303   4
   7   6   0 312.514 20.2983   2
  -8  -6   0 2.35534 12.5415   5
  -8  -6   0 2.59267 14.7497   5
  -8  -6   0 -1.9146 12.1115   2
  -8  -6   0 2.37293 10.3579   4
   8   6   0 9.48761 13.2835   5
   8   6   0 2.29679 11.7835   2
   8   6   0 -8.2210 13.2687   5
   8   6   0 -15.137 10.2641   4
  -9  -6   0 293.167 27.8534   5
  -9  -6   0 304.862 23.7586   4
  -9  -6   0 267.646 25.9148   2
  -9  -6   0 246.426 30.1440   5
   9   6   0 301.548 28.7038   5
   9   6   0 296.291 25.7327   2
   9   6   0 286.368 28.5264   5
   9   6   0 283.214 23.2075   4
 -10  -6   0 48.1639 15.4093   4
 -10  -6   0 21.9616 21.0902   5
 -10  -6   0 29.9642 18.1511   2
 -10  -6   0 28.3854 21.8462   5
  10   6   0 -3.7048 14.1819   4
  10   6   0 49.0165 17.0927   2
  10   6   0 35.8676 18.7979   5
  10   6   0 30.3258 19.9333   5
 -11  -6   0 176.665 21.3723   4
 -11  -6   0 213.830 28.2541   5
 -11  -6   0 208.768 30.6149   5
 -11  -6   0 147.508 24.7508   2
  11   6   0 190.139 27.2491   5
  11   6   0 139.721 24.6263   2
  11   6   0 164.785 21.2777   4
  11   6   0 215.930 30.4484   5
 -12  -6   0 -44.796 19.8558   4
 -12  -6   0 11.4775 31.7689   5
 -12  -6   0 2.36676 28.6105   5
 -12  -6   0 39.6368 26.0074   2
  12   6   0 -12.727 19.8089   5
  12   6   0 -48.012 20.9235   4
  12   6   0 12.2740 25.7246   5
 -13  -6   0 15.7311 32.0013   5
 -13  -6   0 -16.122 29.4077   2
  13   6   0 -5.0763 25.7581   4
  13   6   0 20.4617 33.0640   5
  13   6   0 -32.372 38.5602   5
 -12   7   0 99.7100 38.2205   3
 -12   7   0 42.6292 30.7235   2
  11  -7   0 -1.0352 22.5024   5
 -11   7   0 60.8064 32.5481   3
 -11   7   0 11.1141 24.1428   2
  10  -7   0 62.2711 20.5359   5
  10  -7   0 135.470 31.4194   2
  10  -7   0 95.1221 19.7373   5
 -10   7   0 39.6883 27.3265   3
 -10   7   0 56.1405 22.2325   2
 -10   7   0 54.0114 20.5082   5
   9  -7   0 93.5710 26.6841   2
   9  -7   0 61.6169 17.8382   5
   9  -7   0 39.2804 16.6709   5
  -9   7   0 44.9844 19.0523   5
  -9   7   0 52.6075 22.1513   3
  -9   7   0 86.6914 18.3979   5
  -9   7   0 28.1488 27.1375   3
  -9   7   0 64.7312 20.2930   2
   8  -7   0 337.167 35.6625   2
   8  -7   0 275.509 22.1884   5
   8  -7   0 256.585 22.8618   5
  -8   7   0 331.003 35.2090   3
  -8   7   0 291.068 38.3131   3
  -8   7   0 301.857 23.8971   5
  -8   7   0 272.230 28.1971   2
  -8   7   0 294.360 24.0188   5
   7  -7   0 40.2235 18.3435   2
   7  -7   0 22.9082 10.6129   5
   7  -7   0 5.72817 10.6147   5
  -7   7   0 10.5130 13.4521   2
  -7   7   0 15.3297 18.1789   3
  -7   7   0 20.7295 6.30437   4
  -7   7   0 15.3671 10.4307   5
  -7   7   0 19.5083 12.2333   5
  -7   7   0 17.8346 17.7984   3
  -7   7   0 52.1952 7.74133   4
   6  -7   0 14.9560 8.60858   5
   6  -7   0 29.8244 9.52244   5
   6  -7   0 6.91254 14.2593   2
  -6   7   0 19.9842 9.01515   5
  -6   7   0 36.9735 12.8047   2
  -6   7   0 23.8127 15.8973   3
  -6   7   0 37.4458 17.4988   3
  -6   7   0 28.0712 7.79592   4
  -6   7   0 33.5496 9.77851   5
  -6   7   0 27.1459 6.52996   4
   5  -7   0 56.6283 8.86007   5
   5  -7   0 42.0865 8.07202   5
  -5   7   0 56.3860 8.36934   5
  -5   7   0 44.3882 6.64890   4
  -5   7   0 49.1823 8.47218   4
  -5   7   0 47.0122 9.04876   5
  -5   7   0 64.3729 16.6472   3
  -5   7   0 69.5492 16.2403   3
  -5   7   0 74.1592 12.7119   2
   4  -7   0 571.116 16.0571   5
   4  -7   0 582.146 15.9054   5
  -4   7   0 612.348 19.1450   4
  -4   7   0 591.431 16.4641   4
  -4   7   0 580.074 28.7021   3
  -4   7   0 592.651 24.0653   2
  -4   7   0 571.111 16.7805   5
  -3   7   0 121.907 12.0720   4
  -3   7   0 132.261 8.32247   5
  -3   7   0 135.965 8.09538   5
  -3   7   0 137.094 15.6274   3
  -3   7   0 117.070 12.4538   2
  -3   7   0 128.319 9.55449   4
  -2   7   0 40.7854 9.21730   2
  -2   7   0 60.0798 8.16275   4
  -2   7   0 44.2490 10.5006   3
  -2   7   0 57.8353 6.91351   4
  -1   7   0 466.920 20.5591   3
  -1   7   0 433.679 17.6813   2
  -1   7   0 450.998 18.4666   2
  -1   7   0 440.117 14.9295   4
   0   7   0 381.432 17.6875   3
   0   7   0 351.779 17.9639   3
   0   7   0 342.629 13.7166   4
   0   7   0 364.428 15.4079   2
  -1  -7   0 699.611 14.6935   5
  -1  -7   0 728.080 21.8894   2
   1   7   0 711.941 20.0807   2
   1   7   0 697.097 21.5061   3
   1   7   0 701.061 15.9469   5
   1   7   0 686.162 20.5742   3
   1   7   0 697.209 19.7965   4
  -2  -7   0 40.8289 8.20179   4
  -2  -7   0 46.1913 5.91536   5
  -2  -7   0 46.2539 7.10410   5
  -2  -7   0 55.7445 8.69229   2
   2   7   0 47.9651 7.16599   3
   2   7   0 45.1287 7.52873   2
   2   7   0 51.8401 6.75559   3
   2   7   0 48.8630 6.64212   5
   2   7   0 59.1914 6.72319   5
   2   7   0 49.1488 7.52664   4
  -3  -7   0 606.228 20.6750   4
  -3  -7   0 587.594 17.6088   5
  -3  -7   0 607.263 20.3442   2
  -3  -7   0 602.066 19.3710   5
   3   7   0 625.416 19.1189   2
   3   7   0 598.768 14.1406   3
   3   7   0 627.624 18.6238   5
   3   7   0 585.416 14.9845   3
   3   7   0 604.937 19.6135   4
   3   7   0 618.959 18.7302   5
  -4  -7   0 314.599 16.8556   4
  -4  -7   0 322.316 15.3708   5
  -4  -7   0 330.626 18.1969   5
  -4  -7   0 324.183 16.7863   2
   4   7   0 310.444 15.6474   5
   4   7   0 321.941 15.5001   5
   4   7   0 304.005 15.9505   4
   4   7   0 340.671 15.7087   2
  -5  -7   0 736.243 24.2690   5
  -5  -7   0 700.364 26.2098   5
  -5  -7   0 735.986 24.8335   2
  -5  -7   0 788.150 25.0708   4
   5   7   0 738.932 24.9385   5
   5   7   0 784.450 23.6539   2
   5   7   0 755.711 24.3437   4
  -6  -7   0 9.28312 10.0001   5
  -6  -7   0 16.5776 9.17420   4
  -6  -7   0 2.55810 10.4990   2
   6   7   0 3.62460 9.97963   5
   6   7   0 16.3064 9.24497   2
   6   7   0 27.7998 9.24902   4
   6   7   0 7.04194 9.65462   5
  -7  -7   0 36.2188 12.2593   2
  -7  -7   0 51.0642 12.8012   5
  -7  -7   0 56.1954 16.5045   5
  -7  -7   0 46.6901 11.8954   4
   7   7   0 55.3377 14.8131   5
   7   7   0 54.6197 12.7593   2
   7   7   0 69.0689 15.6314   5
   7   7   0 68.3746 11.8475   4
  -8  -7   0 225.228 21.5498   4
  -8  -7   0 195.113 19.5759   5
  -8  -7   0 127.760 19.4131   5
  -8  -7   0 188.646 18.2835   2
   8   7   0 227.492 25.4310   5
   8   7   0 147.515 17.6503   5
   8   7   0 197.042 21.0432   4
   8   7   0 183.029 18.2179   2
  -9  -7   0 200.284 35.3389   5
  -9  -7   0 180.587 20.4657   2
  -9  -7   0 206.028 26.6716   5
  -9  -7   0 179.048 18.8187   4
   9   7   0 176.931 17.9174   4
   9   7   0 194.167 24.1469   5
   9   7   0 172.822 20.0270   2
   9   7   0 271.841 28.7977   5
 -10  -7   0 33.1973 22.8750   5
 -10  -7   0 39.6813 17.3976   4
 -10  -7   0 53.1617 20.2076   2
 -10  -7   0 60.0696 20.2970   5
  10   7   0 63.6462 19.9218   2
  10   7   0 71.8651 17.0476   4
  10   7   0 36.9858 15.5761   5
  10   7   0 42.1070 19.0270   5
 -11  -7   0 11.1616 23.0791   5
 -11  -7   0 27.2992 27.2281   5
 -11  -7   0 34.1376 23.1927   2
 -11  -7   0 -5.0925 18.4922   4
  11   7   0 -20.148 17.9119   5
  11   7   0 20.0649 18.6317   4
  11   7   0 -15.821 20.5072   2
  11   7   0 2.48097 21.9092   5
 -12  -7   0 55.8298 27.7595   2
 -12  -7   0 78.1254 24.7560   4
 -12  -7   0 19.2119 21.9343   5
  12   7   0 71.6526 29.7041   5
  12   7   0 8.89963 26.7311   5
  12   7   0 44.6766 23.5251   4
 -13  -7   0 -10.251 33.0810   5
 -13  -7   0 8.53879 30.3465   2
  13   7   0 2.97057 51.6549   5
  11  -8   0 66.7648 25.4586   5
 -11   8   0 25.2652 27.5486   2
 -11   8   0 1.28601 36.3458   3
  10  -8   0 81.5834 21.2488   5
  10  -8   0 85.2334 20.1743   5
 -10   8   0 79.0648 33.0077   3
 -10   8   0 71.2246 22.0908   5
 -10   8   0 71.7303 24.3891   2
   9  -8   0 178.532 19.6193   5
   9  -8   0 166.381 31.1263   2
   9  -8   0 147.793 19.5509   5
  -9   8   0 117.103 22.7951   2
  -9   8   0 154.949 31.7111   3
  -9   8   0 109.438 21.6649   5
  -9   8   0 166.625 34.9651   3
  -9   8   0 134.554 20.4053   5
   8  -8   0 144.962 17.7423   5
   8  -8   0 75.3668 25.4222   2
   8  -8   0 106.124 15.1337   5
  -8   8   0 118.188 18.7081   5
  -8   8   0 108.504 15.6880   5
  -8   8   0 108.677 30.0030   3
  -8   8   0 107.193 20.2225   2
  -8   8   0 104.050 24.1523   3
   7  -8   0 271.301 20.3360   5
   7  -8   0 256.521 25.8725   2
   7  -8   0 265.118 19.0863   5
  -7   8   0 248.406 19.8874   5
  -7   8   0 248.674 20.4437   5
  -7   8   0 245.758 12.4866   4
  -7   8   0 281.600 36.3477   3
  -7   8   0 290.049 33.7364   3
  -7   8   0 294.696 15.4658   4
   6  -8   0 4.89924 15.4948   5
   6  -8   0 3.38717 17.1657   2
   6  -8   0 1.33554 8.64308   5
  -6   8   0 10.2309 9.58574   5
  -6   8   0 -4.0518 8.41872   4
  -6   8   0 4.69419 8.90866   5
  -6   8   0 4.55318 6.28394   4
  -6   8   0 12.2856 12.8905   2
  -6   8   0 21.0191 18.1263   3
   5  -8   0 1344.30 30.3574   5
   5  -8   0 1418.75 30.5474   5
  -5   8   0 1428.59 31.6974   5
  -5   8   0 1401.94 29.8307   4
  -5   8   0 1421.27 32.3635   5
  -5   8   0 1414.02 49.5600   3
  -5   8   0 1360.47 39.2971   2
  -5   8   0 1411.36 47.4873   3
  -5   8   0 1348.38 32.3985   4
  -4   8   0 52.3480 9.47855   4
  -4   8   0 55.9901 7.64071   5
  -4   8   0 66.2549 16.1519   3
  -4   8   0 67.0235 7.61201   5
  -4   8   0 57.3310 7.71139   4
  -4   8   0 48.6082 15.6600   3
  -4   8   0 61.5522 12.9835   2
  -3   8   0 235.801 22.6211   3
  -3   8   0 229.049 18.1179   2
  -3   8   0 211.754 24.6450   3
  -3   8   0 256.702 12.4918   4
  -3   8   0 245.934 15.4472   4
  -2   8   0 4.22603 5.98967   4
  -2   8   0 4.59702 7.68543   4
  -2   8   0 14.2386 11.2505   3
  -2   8   0 6.50679 9.06243   2
  -2   8   0 0.39641 9.86200   3
  -1   8   0 2683.72 54.6012   2
  -1   8   0 2773.29 60.3505   3
  -1   8   0 2657.49 51.9420   4
  -1   8   0 2670.09 56.0021   2
  -1   8   0 2749.68 59.5535   3
   0   8   0 173.067 15.5294   3
   0   8   0 157.045 13.5180   2
   0   8   0 144.187 11.7014   4
   0   8   0 170.653 16.1840   3
   1   8   0 720.176 21.4480   4
   1   8   0 714.803 22.4444   3
   1   8   0 706.346 21.4544   2
   1   8   0 745.617 17.0217   5
   1   8   0 696.615 16.3338   5
   1   8   0 693.272 23.1278   3
  -2  -8   0 175.878 9.68416   5
  -2  -8   0 194.257 15.5772   2
  -2  -8   0 165.531 11.5057   5
   2   8   0 174.791 10.6866   5
   2   8   0 176.823 13.0701   3
   2   8   0 169.185 12.9541   2
   2   8   0 186.462 10.7279   5
   2   8   0 168.569 11.9033   3
   2   8   0 171.026 13.2221   4
  -3  -8   0 1284.11 30.4353   5
  -3  -8   0 1250.60 28.5668   5
  -3  -8   0 1301.55 33.4117   4
  -3  -8   0 1324.50 32.7517   2
   3   8   0 1250.30 32.2581   4
   3   8   0 1285.02 29.7570   5
   3   8   0 1223.23 26.9210   3
   3   8   0 1293.81 30.4499   2
   3   8   0 1253.26 25.8390   3
   3   8   0 1200.08 32.4426   5
  -4  -8   0 715.246 24.5316   2
  -4  -8   0 705.144 24.1328   5
  -4  -8   0 693.798 21.8540   5
  -4  -8   0 766.511 25.4869   4
   4   8   0 726.112 23.3995   5
   4   8   0 707.954 23.5029   4
   4   8   0 715.992 22.4787   2
   4   8   0 710.111 22.9644   5
  -5  -8   0 18.3406 10.2965   4
  -5  -8   0 16.8914 9.28942   5
  -5  -8   0 6.90449 10.4653   2
  -5  -8   0 6.37818 11.0264   5
   5   8   0 10.3705 8.58094   4
   5   8   0 9.10722 9.50523   2
   5   8   0 14.0994 8.81123   5
   5   8   0 8.32369 9.33172   5
  -6  -8   0 598.978 25.6383   2
  -6  -8   0 522.436 27.4648   5
  -6  -8   0 570.503 25.7795   4
  -6  -8   0 609.952 25.0422   5
   6   8   0 604.358 26.1433   5
   6   8   0 589.536 23.6206   2
   6   8   0 614.089 25.7593   5
   6   8   0 599.610 24.1762   4
  -7  -8   0 166.960 16.8436   4
  -7  -8   0 154.094 17.0730   5
  -7  -8   0 150.268 16.2313   2
   7   8   0 165.314 16.1077   2
   7   8   0 180.453 19.5592   4
   7   8   0 132.442 16.0639   5
   7   8   0 134.186 18.1265   5
  -8  -8   0 121.159 18.0035   5
  -8  -8   0 82.3407 15.5799   4
  -8  -8   0 113.811 17.6440   2
  -8  -8   0 113.996 20.7677   5
   8   8   0 130.928 16.8257   2
   8   8   0 92.9798 16.9661   5
   8   8   0 112.338 16.1997   5
   8   8   0 87.8792 15.1542   4
  -9  -8   0 4.43034 15.5679   4
  -9  -8   0 39.0581 17.5765   2
  -9  -8   0 2.77315 20.4213   5
  -9  -8   0 51.3950 17.4669   5
   9   8   0 21.3082 14.8599   4
   9   8   0 2.51072 18.5675   5
   9   8   0 1.51553 15.8119   2
   9   8   0 -4.3498 15.3734   5
 -10  -8   0 31.3636 20.7339   5
 -10  -8   0 8.88458 20.2861   2
 -10  -8   0 19.6990 19.6405   4
 -10  -8   0 3.39356 23.1440   5
  10   8   0 25.6189 19.5620   2
  10   8   0 53.6315 19.1512   5
  10   8   0 32.2316 18.1762   4
  10   8   0 26.2482 19.6371   5
 -11  -8   0 94.6815 29.7231   5
 -11  -8   0 84.0839 24.9591   2
 -11  -8   0 77.0600 22.9171   4
 -11  -8   0 90.3139 26.6265   5
  11   8   0 61.5527 27.5033   5
  11   8   0 90.7454 23.1388   4
  11   8   0 98.0251 25.4458   5
  11   8   0 57.3421 23.5812   2
 -12  -8   0 22.7298 26.2996   5
 -12  -8   0 67.0237 28.7098   2
  12   8   0 30.7652 24.3387   5
  12   8   0 20.3219 33.1493   5
 -11   9   0 28.7326 29.5441   2
  10  -9   0 -5.3380 18.7827   5
  10  -9   0 39.0363 22.0439   5
 -10   9   0 3.44141 30.0953   3
 -10   9   0 12.0387 24.4039   2
 -10   9   0 22.2978 22.5878   5
   9  -9   0 55.8788 17.5501   5
   9  -9   0 34.0725 16.4045   5
   9  -9   0 6.78367 30.1517   2
  -9   9   0 32.0935 28.4576   3
  -9   9   0 -4.5438 17.1864   5
  -9   9   0 10.2160 21.6571   2
   8  -9   0 493.543 26.6547   5
   8  -9   0 528.473 45.7867   2
   8  -9   0 467.920 25.4126   5
  -8   9   0 458.465 29.4777   5
  -8   9   0 479.511 45.2675   3
  -8   9   0 537.279 53.0157   3
  -8   9   0 511.551 36.2560   2
  -8   9   0 463.063 27.9592   5
   7  -9   0 47.0094 11.9773   5
   7  -9   0 60.9280 12.5530   5
  -7   9   0 90.1905 13.6394   5
  -7   9   0 76.1378 14.2893   5
  -7   9   0 63.7318 26.2820   3
  -7   9   0 68.6492 10.7576   4
  -7   9   0 32.8575 20.0583   3
  -7   9   0 60.3219 17.4284   2
  -7   9   0 77.2504 8.59454   4
   6  -9   0 349.611 17.9712   5
  -6   9   0 338.177 19.6080   5
  -6   9   0 369.545 15.1714   4
  -6   9   0 416.963 27.8478   2
  -6   9   0 372.842 19.5689   5
  -6   9   0 316.302 33.2651   3
  -6   9   0 342.067 18.7394   4
  -6   9   0 330.138 36.5037   3
  -5   9   0 -4.0690 11.7650   2
  -5   9   0 35.2884 10.0574   4
  -5   9   0 27.2574 9.02140   5
  -5   9   0 23.7888 7.49442   4
  -5   9   0 30.3614 18.4335   3
  -5   9   0 10.3967 8.05432   5
  -5   9   0 2.91953 17.0856   3
  -4   9   0 936.686 41.6362   3
  -4   9   0 931.709 24.2642   4
  -4   9   0 932.990 32.9690   2
  -4   9   0 932.858 27.9283   4
  -4   9   0 951.868 39.1144   3
  -3   9   0 26.6032 7.62536   4
  -3   9   0 15.9199 9.77835   4
  -3   9   0 26.8598 13.0286   3
  -3   9   0 18.9810 14.0963   3
  -3   9   0 17.4445 11.3724   2
  -2   9   0 34.7739 9.59695   4
  -2   9   0 24.4474 10.2353   2
  -2   9   0 28.3869 12.6877   3
  -2   9   0 17.1285 10.9148   2
  -2   9   0 20.3378 13.3101   3
  -2   9   0 25.1622 7.52115   4
  -1   9   0 148.879 20.2131   3
  -1   9   0 183.365 17.9337   2
  -1   9   0 172.401 16.4927   2
  -1   9   0 166.142 13.0138   4
  -1   9   0 160.469 18.5226   3
   0   9   0 2694.91 53.6902   4
   0   9   0 2666.06 58.2195   3
   0   9   0 2717.20 54.8087   2
   0   9   0 2678.82 59.3529   3
   1   9   0 174.623 14.3632   4
   1   9   0 157.792 16.1272   3
   1   9   0 151.391 15.1932   3
   1   9   0 163.555 14.7040   2
  -2  -9   0 1134.73 24.5637   5
  -2  -9   0 1213.85 26.7535   5
  -2  -9   0 1166.62 32.6830   2
   2   9   0 1189.58 30.7060   3
   2   9   0 1174.29 31.9181   4
   2   9   0 1222.71 26.8032   5
   2   9   0 1205.53 29.3163   3
   2   9   0 1200.05 30.1175   2
  -3  -9   0 983.704 24.7614   5
  -3  -9   0 1024.55 27.4230   5
  -3  -9   0 1046.21 30.9428   2
   3   9   0 1008.96 23.7062   3
   3   9   0 1054.25 26.8627   5
   3   9   0 1032.39 27.9404   2
   3   9   0 992.885 25.1563   3
   3   9   0 1031.01 26.5363   5
   3   9   0 1041.34 29.2882   4
  -4  -9   0 1356.40 35.3326   5
  -4  -9   0 1345.55 37.8137   4
  -4  -9   0 1420.50 37.1399   2
  -4  -9   0 1313.30 32.4548   5
   4   9   0 1370.61 34.3923   5
   4   9   0 1421.29 34.4059   2
   4   9   0 1381.03 35.6782   4
   4   9   0 1401.56 34.4516   5
  -5  -9   0 -1.3430 9.68107   5
  -5  -9   0 -4.4281 11.5790   2
  -5  -9   0 -17.951 9.91264   4
  -5  -9   0 -14.253 11.7075   5
   5   9   0 14.5254 9.71339   4
   5   9   0 19.7294 10.4203   5
   5   9   0 17.5276 10.5594   5
   5   9   0 5.54457 11.2614   2
  -6  -9   0 114.120 14.7560   5
  -6  -9   0 120.291 17.6707   5
  -6  -9   0 89.7783 22.8527   4
  -6  -9   0 98.9930 15.0708   2
   6   9   0 133.602 17.0525   5
   6   9   0 104.697 13.8349   2
   6   9   0 110.000 16.0155   5
   6   9   0 105.900 13.3461   4
  -7  -9   0 -6.6878 13.1279   4
  -7  -9   0 1.44118 15.5097   5
  -7  -9   0 2.34379 13.5395   2
  -7  -9   0 -8.3669 13.2553   5
   7   9   0 0.25968 11.9491   2
   7   9   0 20.2151 14.0201   5
   7   9   0 14.9648 12.0384   4
   7   9   0 8.04700 12.2629   5
  -8  -9   0 253.024 26.9994   5
  -8  -9   0 211.525 21.6380   4
  -8  -9   0 185.639 21.7668   2
   8   9   0 218.270 24.2945   2
   8   9   0 219.465 20.0294   4
   8   9   0 255.718 25.7310   5
   8   9   0 253.530 29.6684   5
  -9  -9   0 34.4124 18.8108   4
  -9  -9   0 118.864 21.5024   5
  -9  -9   0 85.8987 25.0032   5
  -9  -9   0 82.9777 20.6145   2
   9   9   0 39.7979 19.1890   5
   9   9   0 46.0511 17.2862   2
   9   9   0 55.9573 18.1876   5
   9   9   0 77.4316 18.2900   4
 -10  -9   0 115.196 23.3238   4
 -10  -9   0 83.4203 23.4677   2
 -10  -9   0 93.0368 24.7761   5
 -10  -9   0 115.269 30.8013   5
  10   9   0 122.865 24.2405   2
  10   9   0 142.108 26.4800   5
  10   9   0 121.830 26.4433   5
  10   9   0 123.454 23.2688   4
 -11  -9   0 -48.367 25.3089   5
 -11  -9   0 19.4014 25.4042   2
  11   9   0 -2.2023 25.3683   5
  11   9   0 11.9621 25.6143   5
 -12  -9   0 -7.8342 29.7068   2
 -12  -9   0 92.0257 32.0312   5
  10 -10   0 -15.095 20.2981   5
 -10  10   0 16.0169 26.6663   2
 -10  10   0 -18.853 32.9408   3
   9 -10   0 120.937 20.4824   5
  -9  10   0 117.329 22.9684   5
  -9  10   0 111.574 26.5413   2
  -9  10   0 89.6734 33.1995   3
   8 -10   0 84.8458 15.9174   5
  -8  10   0 83.1603 18.5849   5
  -8  10   0 75.3779 28.4791   3
  -8  10   0 75.7097 22.4143   2
   7 -10   0 154.988 19.1096   5
   7 -10   0 155.627 17.1540   5
  -7  10   0 187.199 23.4791   2
  -7  10   0 168.373 26.7568   3
  -7  10   0 193.226 17.9541   5
  -7  10   0 200.205 35.0777   3
  -7  10   0 165.467 14.4995   4
  -7  10   0 165.813 14.2087   4
  -7  10   0 215.041 22.4153   5
  -6  10   0 26.8036 21.3307   3
  -6  10   0 11.9164 15.2222   2
  -6  10   0 1.25144 10.9415   5
  -6  10   0 32.0331 23.6932   3
  -6  10   0 20.0885 11.0713   5
  -6  10   0 18.0415 10.9826   4
  -6  10   0 9.95758 8.25963   4
  -5  10   0 17.4324 18.2697   3
  -5  10   0 5.74159 13.6202   2
  -5  10   0 0.99017 8.04460   5
  -5  10   0 2.50903 11.1196   4
  -5  10   0 -4.8997 7.54617   4
  -5  10   0 -7.7165 13.2271   5
  -5  10   0 -5.9663 19.5387   3
  -4  10   0 62.5594 19.2039   3
  -4  10   0 43.3283 11.9132   4
  -4  10   0 48.9614 14.9157   2
  -4  10   0 57.0668 9.05153   4
  -4  10   0 51.0599 20.2523   3
  -3  10   0 66.1838 14.3142   2
  -3  10   0 50.0429 16.1888   3
  -3  10   0 35.6990 8.80158   4
  -3  10   0 51.2330 12.1788   4
  -3  10   0 34.2463 13.8092   2
  -3  10   0 44.0873 16.0808   3
  -2  10   0 580.790 32.0391   3
  -2  10   0 597.719 30.8592   3
  -2  10   0 548.182 20.3916   4
  -2  10   0 554.675 26.8772   2
  -2  10   0 560.632 25.9444   2
  -2  10   0 544.999 24.7223   4
  -1  10   0 89.7108 10.9528   4
  -1  10   0 94.1534 12.9453   2
  -1  10   0 95.6635 15.3036   3
  -1  10   0 88.6812 14.1134   2
  -1  10   0 98.1466 16.1474   3
   0  10   0 29.2317 11.5244   3
   0  10   0 50.3215 10.9356   4
   0  10   0 42.3037 10.6191   2
   0  10   0 50.3949 12.6485   3
   1  10   0 304.394 18.4368   2
   1  10   0 298.690 19.8271   3
   1  10   0 294.887 20.4909   3
   1  10   0 306.955 18.2006   4
   2  10   0 208.478 15.8994   3
   2  10   0 233.644 12.6691   5
   2  10   0 242.981 18.1169   4
   2  10   0 206.014 17.2217   3
   2  10   0 201.918 16.5830   2
   2  10   0 218.112 13.5465   5
  -3 -10   0 398.852 18.5838   5
  -3 -10   0 354.992 15.4420   5
  -3 -10   0 319.191 23.7671   2
   3  10   0 377.760 19.7859   2
   3  10   0 378.017 16.9920   5
   3  10   0 354.591 17.7115   3
   3  10   0 335.523 20.1110   4
   3  10   0 388.614 15.9301   3
   3  10   0 398.108 17.5384   5
  -4 -10   0 -16.879 10.4542   5
  -4 -10   0 10.0990 13.0940   2
  -4 -10   0 10.8427 8.84408   5
   4  10   0 1.10237 9.41293   5
   4  10   0 -5.4702 8.91828   5
   4  10   0 -5.9988 9.66074   2
   4  10   0 16.2175 9.42871   4
  -5 -10   0 410.492 22.1943   5
  -5 -10   0 413.402 25.9816   2
  -5 -10   0 456.105 24.8287   5
   5  10   0 459.783 23.1409   5
   5  10   0 432.913 22.8005   5
   5  10   0 436.300 23.1735   2
   5  10   0 434.216 23.4475   4
  -6 -10   0 42.2276 15.5656   2
  -6 -10   0 21.8764 12.5852   5
  -6 -10   0 54.3204 16.2256   5
   6  10   0 50.2559 12.8640   5
   6  10   0 14.4490 11.7978   4
   6  10   0 59.1276 14.5495   2
   6  10   0 45.4018 14.6727   5
  -7 -10   0 387.298 27.2354   5
  -7 -10   0 341.739 30.0982   4
  -7 -10   0 302.216 29.5052   5
  -7 -10   0 327.808 29.0093   2
   7  10   0 319.365 27.0426   5
   7  10   0 327.993 25.3267   2
   7  10   0 347.251 27.0757   5
   7  10   0 320.946 26.5256   4
  -8 -10   0 144.000 22.4585   4
  -8 -10   0 111.337 27.3921   5
  -8 -10   0 124.734 20.8984   5
  -8 -10   0 116.774 20.8102   2
   8  10   0 121.203 19.8311   4
   8  10   0 102.497 18.8937   5
   8  10   0 128.169 23.5344   5
   8  10   0 137.706 18.8812   2
  -9 -10   0 594.615 39.3878   2
  -9 -10   0 639.534 38.1752   5
   9  10   0 617.094 42.3656   5
   9  10   0 519.567 36.8388   4
   9  10   0 611.915 44.2335   5
   9  10   0 625.524 35.9863   2
 -10 -10   0 50.7994 27.3781   5
 -10 -10   0 62.5331 25.2181   2
 -10 -10   0 12.1822 23.4181   5
  10  10   0 41.0629 24.7125   5
  10  10   0 31.0699 23.8325   2
 -11 -10   0 183.222 28.8351   5
 -11 -10   0 171.679 31.3276   2
   9 -11   0 29.5501 16.2136   5
   9 -11   0 31.0057 18.7650   5
  -9  11   0 17.8681 19.5777   5
  -9  11   0 20.1530 36.2868   3
  -9  11   0 3.70777 26.4094   2
  -8  11   0 745.132 34.4198   5
  -8  11   0 682.360 21.9204   4
  -8  11   0 610.988 54.9736   3
  -8  11   0 679.312 45.2580   2
  -7  11   0 196.272 17.4913   4
  -7  11   0 184.181 16.8629   4
  -7  11   0 168.749 30.4640   3
  -7  11   0 146.192 24.2703   2
  -7  11   0 181.972 17.8246   5
  -7  11   0 202.766 22.0091   5
  -6  11   0 105.617 15.7519   4
  -6  11   0 137.079 13.1208   4
  -6  11   0 164.425 33.9790   3
  -6  11   0 129.150 26.9993   3
  -6  11   0 160.641 22.0938   2
  -5  11   0 42.3911 20.1483   3
  -5  11   0 -5.2748 13.2061   4
  -5  11   0 -5.3234 22.4863   3
  -5  11   0 18.0975 9.73503   4
  -4  11   0 16.2350 12.8551   4
  -4  11   0 26.9992 21.1707   3
  -4  11   0 4.80499 14.5399   2
  -4  11   0 -3.6533 8.78750   4
  -4  11   0 10.6814 17.3875   3
  -3  11   0 -10.709 13.4744   2
  -3  11   0 16.0244 15.6712   3
  -3  11   0 14.7124 13.8020   2
  -3  11   0 14.4276 9.75048   4
  -3  11   0 -3.9486 17.5748   3
  -3  11   0 5.42651 12.3882   4
  -2  11   0 54.3302 14.8286   2
  -2  11   0 66.2872 13.8964   4
  -2  11   0 54.1450 14.9711   2
  -2  11   0 55.6051 15.7327   3
  -2  11   0 40.1756 10.2448   4
  -2  11   0 59.8511 18.0947   3
  -1  11   0 7.76487 13.8408   3
  -1  11   0 5.88822 9.38935   4
  -1  11   0 18.7722 13.7307   2
  -1  11   0 3.09772 11.3106   4
  -1  11   0 -0.0892 14.2144   3
   0  11   0 303.028 25.3332   3
   0  11   0 278.972 19.1275   4
   0  11   0 313.859 21.7472   2
   0  11   0 282.997 24.0879   3
   1  11   0 71.7862 13.8541   3
   1  11   0 45.8378 11.3678   4
   1  11   0 90.7484 13.4494   2
   1  11   0 66.1954 13.0610   3
   2  11   0 3.14592 10.1109   4
   2  11   0 9.59515 7.56248   5
   2  11   0 -13.865 7.13913   5
   2  11   0 -13.069 10.1900   3
   2  11   0 -20.445 9.89564   2
   2  11   0 -0.6332 9.37070   3
  -3 -11   0 124.517 12.7751   5
  -3 -11   0 128.718 12.9324   5
  -3 -11   0 157.604 18.3960   2
   3  11   0 129.774 15.2496   4
   3  11   0 134.250 14.6775   3
   3  11   0 153.696 14.9291   5
   3  11   0 154.256 16.5227   3
  -4 -11   0 1393.91 36.7046   5
  -4 -11   0 1277.26 32.6816   5
  -4 -11   0 1421.60 42.1039   2
   4  11   0 1346.06 35.2487   5
   4  11   0 1255.86 37.5589   4
   4  11   0 1362.94 36.4805   2
   4  11   0 1329.23 35.5574   5
  -5 -11   0 114.895 16.2303   5
  -5 -11   0 127.719 18.6070   2
  -5 -11   0 105.735 13.8642   5
   5  11   0 102.720 14.5606   5
   5  11   0 104.559 15.2716   4
   5  11   0 106.669 16.0716   2
   5  11   0 96.9334 14.7005   5
  -6 -11   0 22.6713 12.9327   5
  -6 -11   0 60.9610 17.8823   2
  -6 -11   0 46.7438 17.2874   5
   6  11   0 23.8211 15.0619   5
   6  11   0 15.5069 14.0536   4
   6  11   0 32.2127 14.7790   2
   6  11   0 32.3799 13.8079   5
  -7 -11   0 -2.9886 14.9922   5
  -7 -11   0 -10.216 18.3722   2
  -7 -11   0 -5.9914 16.4344   5
   7  11   0 19.8602 16.4855   5
   7  11   0 14.6651 16.3747   4
   7  11   0 -2.7715 14.5506   2
   7  11   0 23.7996 17.1784   5
  -8 -11   0 498.273 38.6830   2
  -8 -11   0 479.937 32.9303   5
  -8 -11   0 430.341 37.2252   5
   8  11   0 403.888 34.3752   4
   8  11   0 550.390 37.8893   5
   8  11   0 407.702 37.2357   5
   8  11   0 502.309 33.0748   2
  -9 -11   0 36.6607 24.8369   2
  -9 -11   0 13.0861 19.4933   5
   9  11   0 18.7741 20.6969   2
   9  11   0 33.0087 23.9930   5
 -10 -11   0 151.242 28.6072   5
 -10 -11   0 188.267 29.7099   2
  10  11   0 216.453 38.7991   2
 -11 -11   0 19.7214 28.9426   5
 -11 -11   0 36.8109 30.8126   2
  -8  12   0 -9.8691 25.5883   2
  -8  12   0 -25.148 32.4963   3
  -8  12   0 15.2117 20.5354   5
  -7  12   0 290.093 37.1315   3
  -7  12   0 276.863 30.2731   2
  -7  12   0 351.848 22.0669   4
  -7  12   0 321.488 28.0869   4
  -6  12   0 15.7211 16.1946   4
  -6  12   0 -2.9714 26.1786   3
  -6  12   0 55.0436 21.3243   2
  -6  12   0 13.4404 29.1391   3
  -6  12   0 25.0399 11.7966   4
  -5  12   0 321.286 27.2750   4
  -5  12   0 232.543 34.7170   3
  -5  12   0 240.726 30.9012   3
  -5  12   0 258.645 23.5259   4
  -5  12   0 314.878 32.3269   2
  -4  12   0 66.4966 20.1345   2
  -4  12   0 76.0073 17.1799   4
  -4  12   0 52.0599 22.5446   3
  -4  12   0 81.3939 25.4650   3
  -4  12   0 83.7479 12.8376   4
  -3  12   0 600.205 32.7559   2
  -3  12   0 582.914 32.8223   2
  -3  12   0 554.704 41.7307   3
  -3  12   0 561.539 38.5661   3
  -3  12   0 545.101 24.5167   4
  -3  12   0 559.229 30.5262   4
  -2  12   0 6.00666 13.4002   4
  -2  12   0 15.4338 18.0845   3
  -2  12   0 1.70549 14.9593   2
  -2  12   0 7.29620 15.2410   2
  -2  12   0 -0.9867 10.7437   4
  -2  12   0 34.9244 17.4916   3
  -1  12   0 229.141 26.5801   3
  -1  12   0 185.781 19.7575   4
  -1  12   0 188.401 19.2526   2
  -1  12   0 215.963 29.5090   3
  -1  12   0 206.808 20.1266   4
  -1  12   0 194.261 21.0036   2
   0  12   0 54.8478 15.9708   3
   0  12   0 18.5117 17.7322   3
   0  12   0 43.5459 15.8447   2
   0  12   0 38.7434 11.9047   4
   0  12   0 54.9990 14.2600   2
   1  12   0 268.324 22.7312   2
   1  12   0 258.802 21.7545   4
   1  12   0 250.179 25.5945   3
   1  12   0 247.771 23.4962   3
   2  12   0 55.7240 13.3637   3
   2  12   0 62.1767 13.7675   2
   2  12   0 61.2564 13.2499   4
   2  12   0 67.6241 14.7257   3
  -3 -12   0 6.87365 8.02085   5
   3  12   0 10.3259 9.98362   5
   3  12   0 8.21617 11.5864   3
   3  12   0 4.59966 12.5088   2
   3  12   0 4.02496 10.1896   5
   3  12   0 25.4850 12.5993   4
   3  12   0 21.4817 10.2513   3
  -4 -12   0 15.6403 10.6300   5
  -4 -12   0 -8.7412 12.9112   5
  -4 -12   0 -5.8337 16.2584   2
   4  12   0 17.9051 12.2581   5
   4  12   0 26.5465 9.72984   3
   4  12   0 -5.6379 7.84504   3
   4  12   0 -3.5375 12.4231   4
   4  12   0 -3.9432 13.3723   2
  -5 -12   0 375.197 26.7122   5
  -5 -12   0 396.778 31.8298   2
  -5 -12   0 362.799 22.5421   5
   5  12   0 334.525 24.4454   5
   5  12   0 327.807 27.5817   4
   5  12   0 327.812 26.1887   2
   5  12   0 326.934 25.4588   5
  -6 -12   0 25.4023 14.3897   5
  -6 -12   0 -11.776 16.9133   5
   6  12   0 -21.172 14.9449   5
   6  12   0 17.6907 16.1685   4
   6  12   0 0.87526 15.1089   2
   6  12   0 4.65739 16.2293   5
  -7 -12   0 15.1272 16.6954   5
  -7 -12   0 29.3924 21.7305   2
  -7 -12   0 36.3161 21.5491   5
   7  12   0 13.5182 17.1822   2
   7  12   0 9.22972 18.2083   4
   7  12   0 9.81407 18.3786   5
   7  12   0 12.0600 18.1376   5
  -8 -12   0 11.7647 18.6766   5
  -8 -12   0 -1.3258 23.9913   2
  -8 -12   0 11.5918 22.7929   5
   8  12   0 -2.3088 22.0601   5
   8  12   0 21.4978 20.4360   2
  -9 -12   0 92.8138 28.4531   2
  -9 -12   0 43.3636 22.2860   5
   9  12   0 91.6110 25.1587   2
 -10 -12   0 6.04555 29.7140   2
 -10 -12   0 27.6888 26.9234   5
  -7  13   0 67.8364 26.5312   2
  -7  13   0 53.7950 18.8002   4
  -7  13   0 59.1090 36.1850   3
  -6  13   0 -1.1976 24.1602   4
  -6  13   0 14.2980 19.0786   4
  -6  13   0 12.5806 22.9365   2
  -6  13   0 -2.2562 26.8469   3
  -5  13   0 46.2396 27.7626   3
  -5  13   0 26.8547 21.6926   2
  -5  13   0 96.9391 28.5809   3
  -5  13   0 67.7718 15.2467   4
  -5  13   0 68.3876 19.2448   4
  -5  13   0 69.4043 24.2920   2
  -4  13   0 262.890 22.7995   4
  -4  13   0 333.507 35.3124   2
  -4  13   0 249.075 32.3641   3
  -4  13   0 310.090 37.5255   3
  -4  13   0 269.721 24.4562   4
  -4  13   0 283.441 28.1494   2
  -3  13   0 90.9908 25.6592   3
  -3  13   0 121.644 22.0593   2
  -3  13   0 101.082 24.0943   3
  -3  13   0 108.094 15.2764   4
  -3  13   0 127.647 20.3995   4
  -2  13   0 206.692 22.2932   4
  -2  13   0 176.068 24.5133   3
  -2  13   0 228.318 24.3340   2
  -2  13   0 215.470 27.3924   3
  -2  13   0 184.745 22.2034   2
  -2  13   0 183.171 17.6482   4
  -1  13   0 1.89109 19.4326   3
  -1  13   0 -4.7853 16.4758   3
  -1  13   0 12.5390 16.9228   2
  -1  13   0 12.1340 15.7896   2
  -1  13   0 5.83957 12.0835   4
   0  13   0 132.405 22.4130   3
   0  13   0 134.118 17.9242   2
   0  13   0 138.287 20.6971   2
   0  13   0 108.075 15.5990   4
   0  13   0 137.563 19.8855   3
   1  13   0 6.05861 16.5903   3
   1  13   0 5.77899 14.5732   3
   1  13   0 16.1832 13.7277   4
   1  13   0 12.4453 14.1590   2
   2  13   0 55.4074 14.5916   4
   2  13   0 60.1417 15.3780   2
   2  13   0 56.5906 14.9974   3
   2  13   0 72.1507 16.6325   3
   3  13   0 32.2717 15.4781   4
   3  13   0 33.6734 12.1058   3
   3  13   0 38.5337 15.1752   2
   3  13   0 38.3605 14.5205   3
   3  13   0 22.5161 11.7392   5
   3  13   0 37.7121 12.1302   5
  -4 -13   0 419.837 24.2460   5
  -4 -13   0 371.898 20.6344   5
  -4 -13   0 379.993 34.7802   2
   4  13   0 424.757 24.1276   5
   4  13   0 389.662 30.5804   4
   4  13   0 336.706 26.6469   2
   4  13   0 376.697 25.3767   5
   4  13   0 358.285 18.0529   3
  -5 -13   0 151.217 17.0491   5
  -5 -13   0 178.651 20.4820   5
   5  13   0 140.714 18.9313   5
   5  13   0 113.259 20.4049   4
   5  13   0 140.428 19.6784   2
  -6 -13   0 51.9781 15.8466   5
  -6 -13   0 53.3749 20.3664   5
  -6 -13   0 43.0620 22.2074   2
   6  13   0 54.5895 18.5739   5
   6  13   0 47.1141 18.0683   2
  -7 -13   0 43.2870 24.6747   2
  -7 -13   0 4.49179 21.3948   5
  -7 -13   0 25.0764 18.0271   5
   7  13   0 12.7118 20.4665   2
   7  13   0 23.8186 23.1945   5
  -8 -13   0 154.434 30.5804   2
  -8 -13   0 162.786 27.8684   5
  -8 -13   0 141.625 24.2289   5
   8  13   0 165.816 26.7973   2
  -9 -13   0 -2.1973 23.1312   5
  -9 -13   0 51.3303 30.9578   2
  -6  14   0 -38.901 32.6787   3
  -6  14   0 17.3978 21.1321   4
  -6  14   0 17.1562 26.4021   2
  -6  14   0 3.82189 33.3060   2
  -5  14   0 51.5581 22.6618   4
  -5  14   0 -31.104 29.0508   3
  -5  14   0 2.51825 16.5968   4
  -5  14   0 -19.744 24.5303   2
  -5  14   0 0.70836 28.8450   2
  -4  14   0 27.2161 29.7507   3
  -4  14   0 44.3840 28.3721   3
  -4  14   0 17.4030 23.5173   2
  -4  14   0 28.6672 24.2710   4
  -4  14   0 31.4394 16.3861   4
  -4  14   0 35.5147 25.3982   2
  -3  14   0 272.598 27.4505   2
  -3  14   0 227.617 31.3314   3
  -3  14   0 263.311 26.7803   4
  -3  14   0 268.732 28.5250   2
  -3  14   0 233.114 36.2182   3
  -3  14   0 252.861 26.7053   4
  -2  14   0 -2.8450 24.2393   3
  -2  14   0 13.9832 19.9340   4
  -2  14   0 -1.8079 14.9940   4
  -2  14   0 21.5138 20.2924   2
  -2  14   0 21.3603 19.5510   2
  -2  14   0 18.0484 22.1804   3
  -1  14   0 9.82377 17.9287   2
  -1  14   0 -5.6106 19.1541   3
  -1  14   0 25.9410 20.0972   4
  -1  14   0 25.9483 22.9113   3
  -1  14   0 -0.3949 14.8418   4
   0  14   0 31.8956 18.8076   3
   0  14   0 27.2475 20.7124   2
   0  14   0 42.1774 17.3916   2
   0  14   0 3.33677 19.6723   4
   0  14   0 -7.7508 19.5046   3
   0  14   0 28.3788 15.6293   4
   1  14   0 24.7175 16.6229   4
   1  14   0 27.5395 18.0194   3
   1  14   0 56.7532 20.6788   3
   1  14   0 43.8210 16.4545   2
   2  14   0 19.5025 17.7716   3
   2  14   0 -13.577 15.5743   4
   2  14   0 -6.6481 15.4846   2
   2  14   0 -3.4674 15.0778   3
   3  14   0 94.5954 18.5293   2
   3  14   0 96.2318 15.7267   3
   3  14   0 104.733 14.4297   5
   3  14   0 139.463 19.4288   3
   3  14   0 120.077 20.7827   4
   4  14   0 142.581 17.6719   5
   4  14   0 153.092 19.9030   2
   4  14   0 132.779 31.0505   4
   4  14   0 99.9917 13.5002   3
   4  14   0 113.212 17.5608   5
  -5 -14   0 363.185 24.7354   5
  -5 -14   0 439.766 30.2892   5
  -5 -14   0 491.747 41.8632   2
   5  14   0 369.878 32.2144   5
   5  14   0 369.820 33.3868   2
  -6 -14   0 0.13044 16.8623   5
  -6 -14   0 97.6786 27.9299   2
  -6 -14   0 7.46990 21.1764   5
   6  14   0 -11.912 20.1416   2
   6  14   0 18.0402 21.5969   5
  -7 -14   0 1.58945 20.3438   5
  -7 -14   0 -24.984 24.3581   5
  -7 -14   0 -7.8814 27.7909   2
   7  14   0 29.5746 24.2277   2
  -8 -14   0 45.3145 27.6675   5
  -8 -14   0 38.0226 31.2456   2
   8  14   0 8.50780 26.4960   2
  -5  15   0 34.5367 26.4161   4
  -5  15   0 45.1142 29.6078   2
  -5  15   0 -23.816 33.2451   3
  -5  15   0 1.46682 36.0575   2
  -4  15   0 -12.427 24.8245   4
  -4  15   0 36.9257 31.3135   3
  -4  15   0 43.4058 31.1864   2
  -4  15   0 -32.028 26.5766   2
  -4  15   0 15.5152 20.4186   4
  -3  15   0 -21.266 25.3307   2
  -3  15   0 9.65955 25.3080   2
  -3  15   0 26.4606 32.4455   3
  -3  15   0 -15.070 23.6814   4
  -3  15   0 19.6063 27.6259   3
  -3  15   0 -6.3350 18.5116   4
  -2  15   0 62.2748 24.0193   2
  -2  15   0 -49.246 24.3718   3
  -2  15   0 60.5031 32.5622   3
  -2  15   0 -15.983 18.5735   4
  -2  15   0 -6.8997 23.5601   2
  -2  15   0 85.5447 26.2544   4
  -1  15   0 59.2104 26.2745   4
  -1  15   0 116.141 24.2104   2
  -1  15   0 92.7305 29.5280   3
  -1  15   0 121.150 26.7927   3
  -1  15   0 85.3542 20.1423   4
  -1  15   0 108.969 26.2574   2
   0  15   0 8.58682 20.3332   2
   0  15   0 -4.3684 25.2392   3
   0  15   0 -7.4047 23.6653   4
   0  15   0 -18.315 17.9372   4
   0  15   0 -2.9374 22.6521   2
   0  15   0 4.06545 23.7754   3
   1  15   0 11.2246 18.3611   4
   1  15   0 45.2376 22.9670   2
   1  15   0 18.0774 19.3806   2
   1  15   0 26.4622 20.0423   3
   1  15   0 50.5188 23.3235   3
   2  15   0 15.6309 19.8359   2
   2  15   0 15.9265 18.6073   3
   3  15   0 66.2382 20.5272   3
   3  15   0 42.8846 17.4513   3
   3  15   0 59.5684 20.8879   2
   4  15   0 117.001 17.6708   5
   4  15   0 50.8276 21.7982   2
   5  15   0 19.6389 20.4391   5
   5  15   0 -0.6336 23.9431   2
  -6 -15   0 2.00408 18.3006   5
  -6 -15   0 -20.282 31.0871   2
   6  15   0 19.9760 26.2903   2
  -7 -15   0 124.418 36.3835   2
   7  15   0 12.5714 27.3010   2
  -3  16   0 81.6222 31.7512   4
  -3  16   0 7.70408 24.8835   4
  -3  16   0 2.48040 30.3252   2
  -3  16   0 28.7764 32.4717   2
  -3  16   0 67.5163 33.9622   3
  -2  16   0 40.5922 30.4569   2
  -2  16   0 43.4910 31.5216   3
  -2  16   0 79.1515 30.5050   4
  -2  16   0 12.9289 22.3742   4
  -2  16   0 11.0154 28.9644   2
  -2  16   0 -21.256 34.6713   3
  -1  16   0 30.0077 27.9816   2
  -1  16   0 -9.8846 19.2341   4
  -1  16   0 2.54958 27.8227   3
  -1  16   0 44.9586 27.5113   2
  -1  16   0 39.8741 30.1587   4
  -1  16   0 -21.476 34.9997   3
   0  16   0 72.3054 28.8403   2
   0  16   0 60.0104 25.8178   2
   0  16   0 71.9585 32.4613   3
   0  16   0 0.07010 28.7948   4
   0  16   0 21.0864 26.0634   3
   1  16   0 39.6044 24.5499   3
   1  16   0 90.9214 28.1384   2
   1  16   0 88.0900 26.0405   2
   1  16   0 25.0950 28.8080   4
   1  16   0 103.790 30.8444   3
   2  16   0 106.381 26.2450   3
   2  16   0 46.6722 22.9725   3
   2  16   0 22.7034 27.8572   2
   2  16   0 -6.5551 24.2932   2
   3  16   0 -14.880 24.8259   2
   3  16   0 -16.813 19.3951   3
   4  16   0 -5.8223 26.6136   2
   5  16   0 4.89274 29.5219   2
   4  16  -1 -32.207 26.4331   2
   3  16  -1 2.42205 26.9275   2
   2  16  -1 -1.4191 29.7778   4
   2  16  -1 -14.861 21.6103   3
   2  16  -1 -17.761 25.0843   2
   1  16  -1 26.3919 25.8374   2
   1  16  -1 44.5252 26.4409   3
   1  16  -1 30.0901 29.0204   3
   1  16  -1 16.9684 28.8759   2
   1  16  -1 39.2269 30.9472   4
   0  16  -1 -25.651 25.9124   3
   0  16  -1 55.6178 34.1289   3
   0  16  -1 37.2186 29.3845   2
   0  16  -1 14.2467 26.1997   2
   0  16  -1 -13.629 29.0569   4
  -1  16  -1 71.9306 30.1620   3
  -1  16  -1 81.8813 29.9220   2
  -1  16  -1 77.5914 36.9672   3
  -1  16  -1 43.9929 29.1111   2
  -1  16  -1 94.4150 31.6622   4
  -2  16  -1 146.658 34.6329   4
  -2  16  -1 118.370 25.5076   4
  -2  16  -1 135.146 34.9106   3
  -2  16  -1 154.523 38.6619   3
  -2  16  -1 152.943 33.3754   2
  -2  16  -1 161.502 33.0785   2
   6  15  -1 68.0661 28.2226   2
  -6 -15   1 55.6443 25.1622   5
  -6 -15   1 67.2212 33.6296   2
  -6 -15   1 95.4797 20.5160   5
   5  15  -1 84.4922 27.1062   2
   5  15  -1 87.5251 21.7593   5
   4  15  -1 -52.933 21.1923   2
   4  15  -1 -17.370 17.1701   5
   3  15  -1 27.0573 20.8807   3
   3  15  -1 -13.463 20.4780   2
   3  15  -1 -10.273 16.8580   3
   2  15  -1 25.8039 21.4297   2
   2  15  -1 -13.429 17.8901   3
   1  15  -1 15.2040 25.0028   2
   1  15  -1 26.9559 23.7427   3
   1  15  -1 24.2687 20.4638   2
   1  15  -1 3.35658 18.2181   4
   1  15  -1 37.0074 25.0715   4
   1  15  -1 -40.279 19.2947   3
   0  15  -1 46.5285 19.7927   4
   0  15  -1 73.7154 26.6344   4
   0  15  -1 67.3647 27.5088   3
   0  15  -1 33.5496 24.9579   2
   0  15  -1 68.0973 22.2623   2
   0  15  -1 3.42430 22.2085   3
  -1  15  -1 29.8754 20.3276   4
  -1  15  -1 49.1293 27.9518   3
  -1  15  -1 -13.327 22.7099   3
  -1  15  -1 15.4107 24.3197   2
  -1  15  -1 0.27139 22.7049   2
  -1  15  -1 39.3700 26.1537   4
  -2  15  -1 37.2509 26.6137   3
  -2  15  -1 84.6308 25.9739   2
  -2  15  -1 33.1639 18.5282   4
  -2  15  -1 51.0390 25.8937   2
  -2  15  -1 63.8863 32.5091   3
  -2  15  -1 37.1632 27.0934   4
  -3  15  -1 127.347 21.9187   4
  -3  15  -1 101.753 34.3274   3
  -3  15  -1 130.388 29.0290   4
  -3  15  -1 187.370 31.4974   2
  -3  15  -1 164.838 30.0794   2
  -3  15  -1 99.9171 31.1514   3
  -4  15  -1 97.9479 30.8607   2
  -4  15  -1 11.8741 25.5615   4
  -4  15  -1 15.5140 29.2236   2
  -4  15  -1 48.8816 22.1548   4
  -4  15  -1 1.56151 32.1245   3
  -5  15  -1 60.6753 31.0538   2
  -5  15  -1 -18.007 34.6057   3
  -5  15  -1 -22.178 27.8523   4
  -8 -14   1 118.145 33.8479   2
   7  14  -1 25.9723 25.6842   2
  -7 -14   1 90.3927 22.5785   5
  -7 -14   1 71.9254 26.1290   5
  -7 -14   1 158.700 32.5164   2
   6  14  -1 396.844 38.6399   2
   6  14  -1 441.720 37.3315   5
  -6 -14   1 554.295 37.5995   5
  -6 -14   1 450.859 30.5382   5
  -6 -14   1 568.056 50.0610   2
   5  14  -1 163.328 24.3213   2
  -5 -14   1 149.074 19.9843   5
  -5 -14   1 147.088 17.5183   5
  -5 -14   1 159.922 29.0692   2
   4  14  -1 110.556 20.6399   2
   4  14  -1 85.1100 16.3646   5
   3  14  -1 23.6645 18.0116   2
   3  14  -1 54.0056 18.4361   4
   3  14  -1 25.9452 14.1570   3
   3  14  -1 43.1144 17.1672   3
   2  14  -1 92.4796 20.6642   3
   2  14  -1 53.0990 17.9098   2
   2  14  -1 48.0865 18.0606   4
   2  14  -1 87.6421 17.7677   3
   1  14  -1 99.6788 19.0640   4
   1  14  -1 75.3915 23.0095   4
   1  14  -1 97.0799 19.9441   3
   1  14  -1 91.3503 18.6286   2
   1  14  -1 95.4171 22.8578   3
   0  14  -1 54.0303 22.3515   4
   0  14  -1 15.5312 20.3539   2
   0  14  -1 -6.3498 20.6618   3
   0  14  -1 1.81219 15.6024   4
   0  14  -1 31.3479 19.5933   3
   0  14  -1 38.4476 18.6479   2
  -1  14  -1 8.81788 20.1149   4
  -1  14  -1 1.30358 20.5916   3
  -1  14  -1 12.2176 18.4883   2
  -1  14  -1 -13.321 22.6473   3
  -1  14  -1 -8.5990 14.8427   4
  -1  14  -1 -16.052 20.3803   2
  -2  14  -1 49.4461 21.4347   2
  -2  14  -1 35.7842 15.8037   4
  -2  14  -1 68.7758 24.5796   3
  -2  14  -1 84.4570 22.6043   4
  -2  14  -1 66.7442 23.5014   2
  -2  14  -1 52.8113 26.0851   3
  -3  14  -1 -6.8199 21.1860   2
  -3  14  -1 6.54952 23.1482   2
  -3  14  -1 3.39587 24.3216   3
  -3  14  -1 1.58788 21.0600   4
  -3  14  -1 47.4801 15.7602   4
  -3  14  -1 24.7108 29.3563   3
  -4  14  -1 -16.738 26.5906   3
  -4  14  -1 38.0117 28.7299   3
  -4  14  -1 7.09035 21.3507   4
  -4  14  -1 9.43248 24.7174   2
  -4  14  -1 38.7549 17.3742   4
  -4  14  -1 46.9746 27.1922   2
  -5  14  -1 2.30005 29.6108   2
  -5  14  -1 31.4920 40.3605   4
  -5  14  -1 20.9171 17.8877   4
  -5  14  -1 -15.671 30.4191   3
  -5  14  -1 -15.467 25.6534   2
  -6  14  -1 18.9067 34.4768   3
  -6  14  -1 33.0494 27.9240   2
  -6  14  -1 10.6685 23.4824   4
  -9 -13   1 60.6343 32.5877   2
   8  13  -1 18.1776 24.4515   2
  -8 -13   1 -28.747 21.3355   5
  -8 -13   1 9.13947 28.6683   2
   7  13  -1 -19.127 21.4438   5
   7  13  -1 18.1749 21.2494   2
  -7 -13   1 6.45563 22.0841   5
  -7 -13   1 18.0749 18.4756   5
  -7 -13   1 19.7284 26.5465   2
   6  13  -1 34.7815 19.0939   2
   6  13  -1 26.0987 19.9191   5
  -6 -13   1 -6.0383 19.2955   5
  -6 -13   1 46.6215 23.5709   2
  -6 -13   1 17.3705 15.6283   5
   5  13  -1 61.7946 16.9064   5
   5  13  -1 17.2913 17.6195   2
   5  13  -1 45.7416 16.5805   5
   5  13  -1 12.6710 17.0406   4
  -5 -13   1 84.9590 24.3629   2
  -5 -13   1 39.6697 14.5091   5
  -5 -13   1 36.4845 17.3890   5
   4  13  -1 50.0958 17.1154   4
   4  13  -1 70.9564 15.3611   5
   4  13  -1 52.7748 10.2266   3
   4  13  -1 61.5363 17.2349   2
  -4 -13   1 75.1887 14.4181   5
  -4 -13   1 49.3548 12.3369   5
   3  13  -1 51.5818 12.7378   3
   3  13  -1 83.5209 12.6334   5
   3  13  -1 69.5209 15.8199   3
   3  13  -1 49.4865 12.4509   5
   3  13  -1 64.7131 17.0187   2
   3  13  -1 77.7824 16.6592   4
   2  13  -1 15.6269 15.4762   3
   2  13  -1 15.4492 14.3156   4
   2  13  -1 14.7001 13.3491   3
   2  13  -1 24.5543 14.3393   2
   1  13  -1 279.106 26.5779   3
   1  13  -1 279.295 35.5852   3
   1  13  -1 303.291 26.1793   2
   1  13  -1 312.417 25.7992   4
   0  13  -1 92.5767 19.8359   2
   0  13  -1 73.8846 19.7239   4
   0  13  -1 76.7350 20.9064   3
   0  13  -1 55.5070 17.8574   3
   0  13  -1 59.8443 15.2466   4
   0  13  -1 91.0529 17.6546   2
  -1  13  -1 18.8990 12.9656   4
  -1  13  -1 24.1979 17.6136   4
  -1  13  -1 27.0288 18.0845   3
  -1  13  -1 6.86948 16.5817   2
  -1  13  -1 18.7186 18.4412   2
  -1  13  -1 27.6873 19.7695   3
  -2  13  -1 50.4190 14.6464   4
  -2  13  -1 32.7360 20.0315   3
  -2  13  -1 50.7022 19.2751   2
  -2  13  -1 86.1394 24.8687   3
  -3  13  -1 137.884 16.0089   4
  -3  13  -1 163.451 23.4851   2
  -3  13  -1 151.097 22.3921   4
  -3  13  -1 121.157 25.8439   3
  -3  13  -1 137.068 27.9926   3
  -3  13  -1 165.300 23.1921   2
  -4  13  -1 43.0757 22.0888   2
  -4  13  -1 0.40157 12.8291   4
  -4  13  -1 30.4051 28.5265   3
  -4  13  -1 -23.294 23.5208   3
  -4  13  -1 7.76195 20.2684   2
  -4  13  -1 -16.499 16.9225   4
  -5  13  -1 31.7512 22.7224   2
  -5  13  -1 2.27660 28.4004   3
  -5  13  -1 33.0281 18.9313   4
  -5  13  -1 8.93712 14.5713   4
  -5  13  -1 -23.764 23.5029   2
  -5  13  -1 6.56515 26.4992   3
  -6  13  -1 76.2238 16.6968   4
  -6  13  -1 59.5341 24.9630   2
  -6  13  -1 33.2316 30.6533   3
  -6  13  -1 42.8926 20.6261   4
  -6  13  -1 76.1283 29.7805   2
  -7  13  -1 106.553 22.2688   4
  -7  13  -1 96.3676 29.4311   2
  -7  13  -1 79.8918 36.6929   3
 -10 -12   1 15.8809 25.9482   5
 -10 -12   1 55.5280 31.2557   2
   9  12  -1 28.5977 21.7637   2
  -9 -12   1 -14.306 21.3218   5
  -9 -12   1 63.9010 28.0183   2
   8  12  -1 17.6947 24.2907   5
   8  12  -1 8.16180 22.3635   2
  -8 -12   1 12.0015 22.0195   5
  -8 -12   1 4.00570 24.9241   2
  -8 -12   1 -4.5296 19.0351   5
   7  12  -1 242.752 23.6303   2
   7  12  -1 253.435 25.8201   5
  -7 -12   1 194.092 21.1990   5
  -7 -12   1 217.478 23.8842   5
  -7 -12   1 218.224 27.9586   2
   6  12  -1 27.7753 17.2683   5
   6  12  -1 19.0256 17.4065   4
   6  12  -1 16.6144 17.4782   5
   6  12  -1 32.4073 17.3382   2
  -6 -12   1 13.0637 15.2823   5
  -6 -12   1 29.6867 17.3083   5
  -6 -12   1 32.4333 21.5440   2
   5  12  -1 16.1769 14.1460   5
   5  12  -1 -14.498 14.5952   2
   5  12  -1 -2.3371 13.9939   4
   5  12  -1 -6.8744 13.8188   5
  -5 -12   1 3.96044 12.8463   5
  -5 -12   1 9.38087 15.2149   5
  -5 -12   1 11.4482 18.6593   2
   4  12  -1 29.3093 12.0239   5
   4  12  -1 14.4859 12.0306   5
   4  12  -1 23.3138 14.1471   4
   4  12  -1 44.8009 15.1986   2
   4  12  -1 16.4956 7.90301   3
  -4 -12   1 18.6330 10.9961   5
  -4 -12   1 36.7614 19.0493   2
  -4 -12   1 31.4105 13.5175   5
   3  12  -1 22.4176 10.4162   3
   3  12  -1 17.2890 12.4802   4
   3  12  -1 26.7254 14.0678   2
   3  12  -1 9.58685 9.98693   5
   3  12  -1 29.3961 12.2155   3
   2  12  -1 133.207 16.2132   2
   2  12  -1 122.500 16.2176   4
   2  12  -1 124.859 15.2853   3
   2  12  -1 130.925 17.0920   3
   1  12  -1 199.726 25.5183   3
   1  12  -1 211.669 23.4878   3
   1  12  -1 212.232 21.6986   4
   1  12  -1 227.191 23.2905   2
   0  12  -1 -1.9747 14.3360   3
   0  12  -1 21.3843 11.7569   4
   0  12  -1 16.4938 13.6029   2
   0  12  -1 20.9984 16.6617   3
  -1  12  -1 3.37182 14.6458   2
  -1  12  -1 16.7544 15.7598   3
  -1  12  -1 -4.4286 16.3247   3
  -1  12  -1 -7.9149 15.1188   2
  -1  12  -1 1.38321 14.5643   4
  -1  12  -1 -16.987 10.2488   4
  -2  12  -1 177.623 20.1824   4
  -2  12  -1 195.756 21.0190   2
  -2  12  -1 185.005 19.7082   4
  -2  12  -1 171.042 21.8338   3
  -2  12  -1 150.999 24.1755   3
  -2  12  -1 159.555 21.4241   2
  -3  12  -1 32.8153 18.8039   3
  -3  12  -1 35.6432 11.7335   4
  -3  12  -1 12.2188 17.9378   2
  -3  12  -1 32.5449 17.4599   2
  -3  12  -1 27.6645 15.8608   4
  -3  12  -1 30.3122 21.6492   3
  -4  12  -1 101.223 20.8356   2
  -4  12  -1 95.4248 25.6481   3
  -4  12  -1 128.021 20.8078   2
  -4  12  -1 95.3075 18.3953   4
  -4  12  -1 115.133 23.8583   3
  -4  12  -1 101.203 13.7261   4
  -5  12  -1 110.517 26.4745   3
  -5  12  -1 121.618 14.8627   4
  -5  12  -1 114.357 22.3006   2
  -5  12  -1 108.247 29.4382   3
  -5  12  -1 116.909 19.3028   4
  -6  12  -1 240.265 53.2235   3
  -6  12  -1 265.878 27.7949   2
  -6  12  -1 260.180 34.7801   3
  -6  12  -1 213.077 21.4249   4
  -7  12  -1 66.0803 25.8181   2
  -7  12  -1 70.5349 14.7309   4
  -7  12  -1 52.5592 19.0524   4
  -7  12  -1 93.9360 33.9090   3
  -8  12  -1 94.1330 20.5788   5
  -8  12  -1 44.1478 33.1572   3
  -8  12  -1 80.6548 29.1910   2
 -10 -11   1 17.4008 26.9931   2
 -10 -11   1 5.16556 23.7053   5
   9  11  -1 60.2547 26.2591   5
   9  11  -1 56.8620 22.5999   2
  -9 -11   1 24.7839 20.2838   5
  -9 -11   1 42.6395 30.5802   5
  -9 -11   1 18.4005 25.1256   2
   8  11  -1 65.2293 18.6256   4
   8  11  -1 58.0030 21.9059   5
   8  11  -1 100.965 20.8307   2
   8  11  -1 27.2954 20.6169   5
  -8 -11   1 68.7469 19.8468   5
  -8 -11   1 125.191 25.5946   2
  -8 -11   1 15.0552 21.5225   5
   7  11  -1 125.777 18.6587   2
   7  11  -1 107.411 20.5230   5
   7  11  -1 102.379 19.2668   5
   7  11  -1 113.982 19.7563   4
  -7 -11   1 119.060 22.3088   2
  -7 -11   1 163.502 20.7024   5
  -7 -11   1 143.949 20.7672   5
   6  11  -1 17.7158 14.8964   4
   6  11  -1 26.4770 13.7051   5
   6  11  -1 43.9630 15.5539   2
   6  11  -1 25.5891 14.6157   5
  -6 -11   1 31.0011 18.4427   2
  -6 -11   1 43.7518 16.4683   5
  -6 -11   1 31.0509 14.8127   5
   5  11  -1 10.2014 13.0318   2
   5  11  -1 1.17440 11.6474   5
   5  11  -1 -2.2747 11.6861   4
   5  11  -1 11.0452 11.3883   5
  -5 -11   1 32.3005 13.8505   5
  -5 -11   1 24.6012 16.6275   2
  -5 -11   1 9.53144 11.6793   5
   4  11  -1 19.9406 12.7516   2
   4  11  -1 17.2938 10.5353   5
   4  11  -1 8.59761 12.0321   4
   4  11  -1 -7.9639 10.8095   5
  -4 -11   1 -4.3740 9.82739   5
  -4 -11   1 -2.3047 11.6109   5
  -4 -11   1 15.8723 15.0902   2
   3  11  -1 -2.2918 8.66747   5
   3  11  -1 4.45255 11.7400   2
   3  11  -1 -1.9826 9.79471   3
   3  11  -1 4.91228 10.8525   4
   3  11  -1 -4.7386 8.50320   5
   3  11  -1 8.90193 8.36472   3
  -3 -11   1 -25.084 14.1604   2
  -3 -11   1 8.34414 9.80136   5
   2  11  -1 19.4647 7.90718   5
   2  11  -1 8.56915 10.7464   3
   2  11  -1 20.9666 7.95983   5
   2  11  -1 -2.5939 10.9390   2
   2  11  -1 2.72364 9.88578   3
   2  11  -1 -3.5021 11.0854   4
   1  11  -1 137.724 15.7326   3
   1  11  -1 103.324 13.6660   4
   1  11  -1 134.221 15.3807   2
   1  11  -1 94.2884 14.8517   3
   0  11  -1 2.98065 11.8533   3
   0  11  -1 -1.1292 11.3490   2
   0  11  -1 12.3934 9.95379   4
   0  11  -1 -6.5455 13.3876   3
  -1  11  -1 53.8294 10.9218   4
  -1  11  -1 56.1171 14.2975   4
  -1  11  -1 80.2497 15.3798   2
  -1  11  -1 58.2967 15.1359   2
  -1  11  -1 52.5280 15.7391   3
  -1  11  -1 74.4675 17.4262   3
  -2  11  -1 32.1929 15.8707   3
  -2  11  -1 67.9790 15.4142   2
  -2  11  -1 48.3586 11.0084   4
  -2  11  -1 62.8931 14.0815   4
  -2  11  -1 53.8813 15.0056   2
  -2  11  -1 58.5774 17.6782   3
  -3  11  -1 46.5311 18.5724   3
  -3  11  -1 16.3759 10.1606   4
  -3  11  -1 32.8690 13.9453   4
  -3  11  -1 42.1282 16.0460   2
  -3  11  -1 38.9879 15.4693   2
  -3  11  -1 34.4050 17.6910   3
  -4  11  -1 106.578 22.4202   3
  -4  11  -1 101.252 16.0638   4
  -4  11  -1 110.454 24.4279   3
  -4  11  -1 131.234 20.3123   2
  -4  11  -1 126.662 19.4780   2
  -5  11  -1 -9.1546 13.4288   4
  -5  11  -1 -1.0167 22.7731   3
  -5  11  -1 2.00838 20.4956   3
  -5  11  -1 -8.9245 9.58776   4
  -5  11  -1 -14.052 16.3377   2
  -6  11  -1 133.272 28.3651   3
  -6  11  -1 83.2060 30.8001   3
  -6  11  -1 77.1786 16.0111   4
  -6  11  -1 108.559 22.0406   2
  -6  11  -1 110.249 12.5143   4
  -7  11  -1 35.8953 13.7150   5
  -7  11  -1 60.9064 21.9706   2
  -7  11  -1 43.1368 13.9524   5
  -7  11  -1 41.7359 15.4580   4
  -7  11  -1 36.0743 11.5572   4
  -7  11  -1 23.2069 24.8834   3
  -8  11  -1 3.84101 14.7664   4
  -8  11  -1 13.1267 11.6774   4
  -8  11  -1 25.9383 23.7795   2
  -8  11  -1 7.63766 17.8296   5
  -8  11  -1 18.7694 29.7929   3
  -9  11  -1 75.9942 34.7829   3
  -9  11  -1 40.3201 19.5081   5
  -9  11  -1 37.1898 27.6894   2
   9 -11   1 37.7361 17.6787   5
 -11 -10   1 57.7396 26.6525   5
 -11 -10   1 50.6134 29.6273   2
  10  10  -1 39.9392 21.7377   2
  10  10  -1 41.2507 25.0741   5
 -10 -10   1 18.2541 25.0356   2
 -10 -10   1 54.9397 22.6395   5
   9  10  -1 -13.533 25.2833   5
   9  10  -1 -32.844 21.7010   5
   9  10  -1 -13.256 19.0646   4
   9  10  -1 19.7425 20.4404   2
  -9 -10   1 -9.5890 21.9757   2
  -9 -10   1 21.8248 20.3568   5
   8  10  -1 -7.7154 16.5263   2
   8  10  -1 -0.2922 19.7275   5
   8  10  -1 -0.1077 16.0394   5
   8  10  -1 -19.009 15.2244   4
  -8 -10   1 22.5903 19.5608   2
  -8 -10   1 3.42385 19.2832   5
  -8 -10   1 12.3697 27.8482   5
   7  10  -1 40.0726 16.0415   5
   7  10  -1 56.2915 17.1770   5
   7  10  -1 40.7458 14.8280   4
   7  10  -1 52.6141 16.0113   2
  -7 -10   1 61.7946 17.4002   5
  -7 -10   1 44.9538 22.1507   2
  -7 -10   1 80.4906 18.1289   5
   6  10  -1 -4.7372 12.2116   5
   6  10  -1 3.34442 11.9557   4
   6  10  -1 -19.436 12.0357   2
   6  10  -1 1.94699 11.9460   5
  -6 -10   1 9.21286 14.7705   2
  -6 -10   1 -7.6334 12.2552   5
  -6 -10   1 -8.0074 14.7468   5
   5  10  -1 16.6545 11.9244   5
   5  10  -1 11.0724 11.1682   4
   5  10  -1 -14.676 10.2625   5
   5  10  -1 -5.5580 11.7216   2
  -5 -10   1 -8.6857 13.5597   2
  -5 -10   1 -3.7064 10.0274   5
  -5 -10   1 -2.0530 12.1689   5
   4  10  -1 193.500 17.1594   5
   4  10  -1 218.264 19.2533   2
   4  10  -1 221.253 19.4359   4
   4  10  -1 184.017 16.2650   5
  -4 -10   1 172.451 18.3109   5
  -4 -10   1 184.891 15.8860   5
  -4 -10   1 189.557 18.6458   2
   3  10  -1 61.8065 10.4438   3
   3  10  -1 70.9661 10.1267   5
   3  10  -1 40.9039 9.55225   5
   3  10  -1 72.2262 12.8585   2
   3  10  -1 81.0326 12.3574   4
   3  10  -1 67.0584 9.07882   3
  -3 -10   1 63.9899 9.25867   5
  -3 -10   1 70.7799 14.4983   2
  -3 -10   1 54.1308 10.4135   5
   2  10  -1 7.28937 6.97449   5
   2  10  -1 14.4818 9.49148   4
   2  10  -1 17.2829 10.0517   2
   2  10  -1 12.8892 10.0369   3
   2  10  -1 13.7556 8.65607   3
  -2 -10   1 8.84879 12.0678   2
   1  10  -1 5.30685 9.10447   3
   1  10  -1 2.92357 8.54206   4
   1  10  -1 14.5660 10.6391   3
   1  10  -1 15.0939 10.3990   2
   0  10  -1 5.35088 10.2483   2
   0  10  -1 8.03229 8.58004   4
   0  10  -1 13.0834 11.7638   3
   0  10  -1 13.2716 10.5381   3
  -1  10  -1 100.106 16.4805   3
  -1  10  -1 107.845 14.2955   2
  -1  10  -1 105.157 15.8179   2
  -1  10  -1 102.165 14.0901   4
  -1  10  -1 108.965 18.0312   4
  -1  10  -1 106.530 16.5395   3
  -2  10  -1 107.640 17.7473   3
  -2  10  -1 103.785 15.5824   2
  -2  10  -1 121.268 12.0211   4
  -2  10  -1 134.700 14.5648   4
  -2  10  -1 75.3401 16.5866   3
  -3  10  -1 176.282 22.6266   3
  -3  10  -1 186.888 19.3123   2
  -3  10  -1 170.500 21.0180   3
  -3  10  -1 151.459 15.0815   4
  -3  10  -1 188.618 16.9681   4
  -3  10  -1 155.612 18.1574   2
  -4  10  -1 86.8488 16.5594   2
  -4  10  -1 86.8447 11.1577   4
  -4  10  -1 66.4088 18.9323   3
  -4  10  -1 84.8438 13.8787   4
  -4  10  -1 75.8183 19.9037   3
  -5  10  -1 2.09215 8.96136   4
  -5  10  -1 -0.5633 13.8477   2
  -5  10  -1 31.7766 20.8610   3
  -5  10  -1 3.75445 17.5311   3
  -5  10  -1 23.1983 12.4007   4
  -6  10  -1 -2.2511 24.2225   3
  -6  10  -1 18.8118 12.7528   4
  -6  10  -1 15.5290 9.56234   4
  -6  10  -1 13.3015 15.7322   2
  -6  10  -1 -6.5222 10.4002   5
  -6  10  -1 -0.3185 19.8521   3
  -7  10  -1 45.5112 28.6719   3
  -7  10  -1 56.7061 14.8859   5
  -7  10  -1 26.0951 24.7394   3
  -7  10  -1 40.0367 20.3225   2
  -7  10  -1 34.8054 10.1581   4
  -7  10  -1 44.1047 21.7273   5
  -7  10  -1 58.4160 13.3149   4
   7 -10   1 48.0601 11.5809   5
  -8  10  -1 -3.6405 9.62230   4
  -8  10  -1 1.82942 24.0447   3
  -8  10  -1 3.25244 12.2684   4
  -8  10  -1 23.0202 21.4566   2
  -8  10  -1 -9.7097 19.0517   5
   8 -10   1 -6.0881 13.4879   5
   8 -10   1 6.04575 12.8710   5
  -9  10  -1 -3.0572 31.4887   3
  -9  10  -1 -5.1139 24.2821   5
  -9  10  -1 1.12236 23.4983   2
   9 -10   1 19.4834 15.9552   5
   9 -10   1 15.6700 16.6972   5
 -10  10  -1 17.5542 27.9197   2
 -10  10  -1 39.3968 36.9388   3
  10 -10   1 74.7745 21.6905   5
  10 -10   1 43.1615 19.5281   5
 -12  -9   1 -50.049 30.4664   2
 -12  -9   1 -35.824 28.7202   5
  11   9  -1 37.2597 25.4191   5
 -11  -9   1 24.9451 26.7515   2
 -11  -9   1 -19.894 28.0730   5
  10   9  -1 119.595 27.1424   5
  10   9  -1 73.9642 21.6177   5
  10   9  -1 121.672 22.5141   4
  10   9  -1 45.2220 22.7772   2
 -10  -9   1 105.896 30.1192   5
 -10  -9   1 65.7583 23.3747   5
 -10  -9   1 89.7553 24.3230   2
   9   9  -1 79.3944 19.2784   2
   9   9  -1 97.9833 23.9100   5
   9   9  -1 59.7866 18.4617   4
   9   9  -1 100.027 22.2615   5
  -9  -9   1 113.179 22.0913   5
  -9  -9   1 85.0163 25.6390   5
  -9  -9   1 81.5674 21.4689   2
   8   9  -1 -2.8175 15.3748   5
   8   9  -1 -4.0200 15.2534   2
   8   9  -1 -1.0045 17.0848   5
   8   9  -1 7.27992 14.0516   4
  -8  -9   1 8.72845 14.3584   5
  -8  -9   1 18.4304 16.8281   2
   7   9  -1 65.1819 17.1088   5
   7   9  -1 73.9724 16.9601   5
   7   9  -1 64.5764 14.6268   2
   7   9  -1 52.0464 13.3812   4
  -7  -9   1 66.4259 17.2331   2
  -7  -9   1 135.689 21.7859   5
  -7  -9   1 62.9808 15.8980   5
   6   9  -1 18.0085 11.0839   4
   6   9  -1 0.55670 11.4503   2
   6   9  -1 3.97573 10.8303   5
   6   9  -1 4.67728 10.4455   5
  -6  -9   1 2.25462 13.0851   2
  -6  -9   1 -5.4422 21.2063   5
  -6  -9   1 31.5306 13.7152   5
   5   9  -1 3.79678 10.4121   5
   5   9  -1 -4.8258 10.4148   2
   5   9  -1 -3.1200 9.91306   5
   5   9  -1 11.0261 9.21130   4
  -5  -9   1 5.74606 9.32499   5
  -5  -9   1 -6.2351 11.3775   5
  -5  -9   1 8.20736 12.5122   2
   4   9  -1 3.25782 9.84751   2
   4   9  -1 -3.0480 7.70723   5
   4   9  -1 3.61661 8.82151   5
   4   9  -1 14.1462 8.86937   4
  -4  -9   1 5.87271 10.1277   5
  -4  -9   1 11.2658 11.8800   2
  -4  -9   1 0.74233 8.46336   5
   3   9  -1 148.914 15.8159   4
   3   9  -1 133.907 11.1191   3
   3   9  -1 129.362 13.0715   3
   3   9  -1 128.691 13.2806   5
   3   9  -1 143.008 13.1958   2
   3   9  -1 144.626 12.7263   5
  -3  -9   1 149.732 12.0075   5
  -3  -9   1 140.354 14.2723   5
  -3  -9   1 140.835 14.6710   2
   2   9  -1 73.3662 10.3378   3
   2   9  -1 81.6787 10.6259   4
   2   9  -1 86.0221 8.49230   5
   2   9  -1 75.0506 9.72509   3
   2   9  -1 79.0115 11.2323   2
   2   9  -1 83.1512 8.66927   5
  -2  -9   1 66.0068 7.22386   5
  -2  -9   1 83.5568 8.44408   5
  -2  -9   1 66.8344 12.6826   2
   1   9  -1 49.4018 10.8267   3
   1   9  -1 30.4134 9.42486   2
   1   9  -1 36.1860 9.70643   3
   0   9  -1 165.147 17.6446   3
   0   9  -1 151.770 15.8496   2
   0   9  -1 187.555 18.4584   3
   0   9  -1 157.812 13.9253   4
  -1   9  -1 273.636 19.0940   4
  -1   9  -1 246.650 15.2614   4
  -1   9  -1 267.424 20.3072   2
  -1   9  -1 231.167 21.6775   3
  -1   9  -1 276.139 21.6709   3
  -1   9  -1 245.547 18.3535   2
  -2   9  -1 152.558 15.5335   2
  -2   9  -1 116.376 14.8532   2
  -2   9  -1 131.081 11.4734   4
  -2   9  -1 128.013 16.8205   3
  -2   9  -1 133.826 13.4050   4
  -2   9  -1 136.584 17.4078   3
  -3   9  -1 186.894 17.6184   4
  -3   9  -1 165.241 16.8183   2
  -3   9  -1 167.255 13.6129   4
  -3   9  -1 185.737 25.8336   3
  -3   9  -1 168.032 23.0930   3
  -4   9  -1 11.9530 16.4033   3
  -4   9  -1 23.7025 10.9506   4
  -4   9  -1 3.78217 13.4084   3
  -4   9  -1 12.3614 12.2416   2
  -4   9  -1 16.5445 7.72774   4
  -5   9  -1 -2.1384 17.5314   3
  -5   9  -1 9.73978 8.31403   5
  -5   9  -1 4.41995 7.30146   4
  -5   9  -1 -4.0853 7.52380   5
  -5   9  -1 0.87142 12.9092   2
  -5   9  -1 9.48259 10.0091   4
  -5   9  -1 -17.923 27.6115   3
  -6   9  -1 37.2967 16.1944   2
  -6   9  -1 10.9212 10.5785   4
  -6   9  -1 31.6739 8.41490   4
  -6   9  -1 19.9236 19.2240   3
  -6   9  -1 16.5988 10.5275   5
  -6   9  -1 39.4849 21.6401   3
  -6   9  -1 23.0277 9.70209   5
   6  -9   1 19.7573 9.30452   5
   6  -9   1 21.4679 9.10140   5
  -7   9  -1 22.7388 21.2604   3
  -7   9  -1 22.5989 8.74912   4
  -7   9  -1 10.5901 23.4556   3
  -7   9  -1 16.8259 11.3484   5
  -7   9  -1 20.9886 10.4585   4
  -7   9  -1 21.9795 13.1121   5
  -7   9  -1 23.0736 17.6451   2
   7  -9   1 27.6787 11.9004   5
   7  -9   1 3.39043 10.6017   5
  -8   9  -1 16.6545 13.9974   5
  -8   9  -1 52.0014 23.6989   3
  -8   9  -1 11.6520 10.7684   4
  -8   9  -1 43.1640 28.7818   3
  -8   9  -1 -1.9002 8.67943   4
  -8   9  -1 -4.3312 15.1037   5
  -8   9  -1 15.4543 18.9534   2
   8  -9   1 3.51664 14.0393   5
  -9   9  -1 6.83754 17.0646   5
  -9   9  -1 32.3459 22.0903   2
  -9   9  -1 29.6341 27.7926   3
   9  -9   1 -2.4975 29.3339   2
   9  -9   1 -8.6631 16.9975   5
 -10   9  -1 54.8494 21.6081   5
 -10   9  -1 46.6645 35.0841   3
 -10   9  -1 6.46932 24.6906   2
  10  -9   1 11.8199 20.4222   5
 -11   9  -1 147.693 31.5742   2
 -12  -8   1 -17.691 28.8792   2
 -12  -8   1 -40.382 30.4959   5
  11   8  -1 155.856 30.1083   5
  11   8  -1 181.983 25.3367   4
  11   8  -1 205.088 36.0521   5
 -11  -8   1 144.308 30.0104   5
 -11  -8   1 202.190 28.8049   2
 -11  -8   1 167.438 28.7761   5
  10   8  -1 292.936 32.5920   4
  10   8  -1 351.656 35.3318   2
  10   8  -1 444.149 39.1651   5
  10   8  -1 299.227 36.6406   5
 -10  -8   1 376.276 35.5399   2
 -10  -8   1 361.780 43.5873   5
 -10  -8   1 302.330 35.4786   5
   9   8  -1 -1.4565 18.8574   5
   9   8  -1 -14.664 15.9733   2
   9   8  -1 -29.760 13.7936   4
   9   8  -1 12.1828 18.8643   5
  -9  -8   1 -6.7945 15.7621   5
  -9  -8   1 24.3041 20.2205   5
  -9  -8   1 2.03564 16.3350   4
  -9  -8   1 -17.678 17.3322   2
   8   8  -1 47.2500 16.9418   5
   8   8  -1 33.0998 13.8503   4
   8   8  -1 19.6511 14.3082   5
   8   8  -1 3.21049 12.7027   2
  -8  -8   1 -16.054 17.5654   5
  -8  -8   1 -1.4067 14.5772   4
  -8  -8   1 -11.161 13.8572   5
  -8  -8   1 4.89175 17.8757   2
   7   8  -1 13.0404 12.2475   2
   7   8  -1 -24.366 11.3107   5
   7   8  -1 -9.9843 10.6547   4
   7   8  -1 12.0009 11.8372   5
  -7  -8   1 -6.1589 13.9993   4
  -7  -8   1 15.3301 12.5809   5
  -7  -8   1 12.2943 13.6563   2
   6   8  -1 159.411 18.1157   2
   6   8  -1 157.771 14.5831   4
   6   8  -1 178.822 19.0732   5
   6   8  -1 181.916 18.4928   5
  -6  -8   1 164.402 18.8360   5
  -6  -8   1 172.906 16.8762   2
  -6  -8   1 149.795 17.3584   5
  -6  -8   1 168.480 17.0771   4
   5   8  -1 89.7325 12.2377   2
   5   8  -1 66.2728 10.4818   4
   5   8  -1 109.331 13.5350   5
   5   8  -1 75.8429 11.8003   5
  -5  -8   1 67.9624 12.5209   2
  -5  -8   1 72.1964 13.1188   5
  -5  -8   1 92.2937 11.8359   5
  -5  -8   1 74.7682 12.1783   4
   4   8  -1 203.814 15.2497   5
   4   8  -1 179.086 13.9198   5
   4   8  -1 225.595 15.9104   2
   4   8  -1 207.093 15.5687   4
  -4  -8   1 180.312 17.4462   2
  -4  -8   1 194.342 16.8183   5
  -4  -8   1 164.967 13.8319   5
   3   8  -1 69.2351 9.33258   5
   3   8  -1 51.4833 9.49246   2
   3   8  -1 60.6788 7.48745   3
   3   8  -1 51.0699 9.74249   5
   3   8  -1 66.3581 8.58127   3
  -3  -8   1 62.5804 11.2390   2
  -3  -8   1 68.0742 8.40025   5
  -3  -8   1 72.2392 9.46344   5
   2   8  -1 644.684 18.0577   5
   2   8  -1 629.115 21.0924   2
   2   8  -1 656.589 21.3432   4
   2   8  -1 675.991 18.0954   5
   2   8  -1 672.017 19.9127   3
   2   8  -1 650.294 20.8438   3
  -2  -8   1 678.895 18.4776   5
  -2  -8   1 667.306 17.0705   5
  -2  -8   1 664.798 23.8517   2
   1   8  -1 233.750 15.2651   3
   1   8  -1 251.875 9.71642   5
   1   8  -1 241.967 13.9345   4
   1   8  -1 230.507 14.9800   2
   1   8  -1 263.448 16.2137   3
   1   8  -1 254.944 9.78771   5
   0   8  -1 250.973 13.7196   4
   0   8  -1 220.799 17.0872   3
   0   8  -1 223.862 17.2494   3
   0   8  -1 211.923 15.2613   2
  -1   8  -1 268.168 19.5111   3
  -1   8  -1 261.985 18.0075   2
  -1   8  -1 279.214 14.1759   4
  -1   8  -1 291.330 20.1834   3
  -1   8  -1 289.846 17.3874   2
  -2   8  -1 695.851 29.1550   3
  -2   8  -1 740.372 30.1443   3
  -2   8  -1 750.051 25.7668   2
  -2   8  -1 755.233 23.8286   4
  -2   8  -1 697.849 26.1271   2
  -2   8  -1 689.854 20.6450   4
  -3   8  -1 12.6140 10.3250   2
  -3   8  -1 6.17065 11.6909   3
  -3   8  -1 -6.5938 13.8245   3
  -3   8  -1 7.53787 8.00257   4
  -3   8  -1 6.49714 6.25334   4
  -4   8  -1 356.943 27.8112   3
  -4   8  -1 339.700 18.1417   4
  -4   8  -1 334.909 22.6302   2
  -4   8  -1 344.339 14.9248   4
  -4   8  -1 331.306 13.2787   5
  -4   8  -1 355.145 12.5446   5
  -4   8  -1 307.739 26.2615   3
  -5   8  -1 1250.60 28.4117   4
  -5   8  -1 1216.07 29.3325   5
  -5   8  -1 1246.65 38.1784   2
  -5   8  -1 1180.99 27.9642   5
  -5   8  -1 1255.55 46.7972   3
  -5   8  -1 1251.80 45.1605   3
  -5   8  -1 1202.99 31.0436   4
   5  -8   1 1237.05 27.2924   5
   5  -8   1 1169.50 26.8180   5
  -6   8  -1 140.869 12.4204   4
  -6   8  -1 138.818 16.0640   5
  -6   8  -1 167.076 29.5890   3
  -6   8  -1 124.244 21.3518   3
  -6   8  -1 132.171 14.4982   5
  -6   8  -1 142.126 17.6337   2
  -6   8  -1 135.696 12.7952   4
   6  -8   1 125.872 14.5117   5
  -7   8  -1 41.8860 8.67202   4
  -7   8  -1 29.8177 11.3675   5
  -7   8  -1 44.1394 21.7189   3
  -7   8  -1 54.3172 12.5355   5
  -7   8  -1 63.6732 23.3099   3
  -7   8  -1 61.7606 17.3054   2
  -7   8  -1 59.5609 10.3506   4
   7  -8   1 58.7478 12.5188   5
   7  -8   1 52.7474 11.7387   5
   7  -8   1 65.5378 21.0097   2
  -8   8  -1 32.7573 9.59936   4
  -8   8  -1 8.27165 25.3363   3
  -8   8  -1 23.7018 14.2265   5
  -8   8  -1 9.46824 13.6415   5
  -8   8  -1 41.6914 18.4533   2
  -8   8  -1 23.0402 8.00706   4
  -8   8  -1 53.0715 23.1430   3
   8  -8   1 21.5709 13.4255   5
   8  -8   1 40.7451 13.3368   5
   8  -8   1 49.2312 23.9675   2
  -9   8  -1 9.23211 29.4455   3
  -9   8  -1 -1.9800 18.4422   5
  -9   8  -1 5.84414 21.9897   3
  -9   8  -1 -1.0850 17.1309   5
  -9   8  -1 33.6363 20.2896   2
   9  -8   1 -39.165 26.4250   2
   9  -8   1 -12.360 14.7384   5
   9  -8   1 5.94741 14.4172   5
 -10   8  -1 -13.812 21.5590   2
 -10   8  -1 -7.4958 28.9772   3
 -10   8  -1 15.9500 22.1048   5
  10  -8   1 -27.860 16.6081   5
  10  -8   1 31.1097 19.0032   5
 -11   8  -1 15.4128 26.2082   2
 -11   8  -1 -19.158 32.5819   3
  11  -8   1 31.6763 24.2407   5
  12   7  -1 28.9083 25.3703   5
  12   7  -1 0.01802 29.2492   5
  12   7  -1 -2.9530 24.0996   4
 -12  -7   1 -26.265 25.6780   2
 -12  -7   1 -1.7559 31.2321   5
  11   7  -1 26.1347 27.8374   2
  11   7  -1 -27.403 18.8470   4
  11   7  -1 34.2644 27.8325   5
  11   7  -1 -9.8578 24.8432   5
 -11  -7   1 10.5812 22.6937   2
 -11  -7   1 14.2505 28.9726   5
 -11  -7   1 28.5901 26.5063   5
  10   7  -1 218.017 25.0376   2
  10   7  -1 198.152 20.4639   4
  10   7  -1 235.115 24.6168   5
  10   7  -1 277.940 33.4134   5
 -10  -7   1 224.392 22.4994   4
 -10  -7   1 220.547 28.0196   5
 -10  -7   1 235.999 29.2075   5
 -10  -7   1 263.143 25.6739   2
   9   7  -1 253.456 26.7316   2
   9   7  -1 248.148 23.4951   4
   9   7  -1 270.484 29.8735   5
   9   7  -1 236.503 27.6711   5
  -9  -7   1 292.379 32.4233   5
  -9  -7   1 249.497 29.0721   5
  -9  -7   1 231.395 22.3252   2
  -9  -7   1 250.149 26.5419   4
   8   7  -1 7.51921 12.2549   4
   8   7  -1 -1.6493 11.3137   5
   8   7  -1 -5.5590 12.0413   2
   8   7  -1 19.0225 14.5815   5
  -8  -7   1 -2.8150 15.3802   5
  -8  -7   1 7.49419 12.3782   4
  -8  -7   1 -3.3870 13.2673   2
  -8  -7   1 2.77176 13.8229   5
   7   7  -1 25.5631 14.4210   5
   7   7  -1 2.01178 11.6954   5
   7   7  -1 -0.1744 10.7760   2
   7   7  -1 -17.840 8.73348   4
  -7  -7   1 5.00663 11.8976   2
  -7  -7   1 -5.9353 10.9294   4
  -7  -7   1 -3.5410 10.8366   5
  -7  -7   1 -3.1607 11.8460   5
   6   7  -1 65.6851 13.2958   5
   6   7  -1 53.0624 10.4279   4
   6   7  -1 64.0261 13.0960   5
   6   7  -1 76.1384 11.6296   2
  -6  -7   1 49.1424 11.9368   2
  -6  -7   1 54.9533 11.7538   4
  -6  -7   1 59.4508 11.9018   5
   5   7  -1 457.559 20.8817   5
   5   7  -1 476.548 19.6623   4
   5   7  -1 470.870 20.2630   2
   5   7  -1 465.241 20.2882   5
  -5  -7   1 463.076 21.8638   5
  -5  -7   1 468.074 20.0311   5
  -5  -7   1 455.626 21.4076   2
  -5  -7   1 482.177 21.3149   4
   4   7  -1 45.1273 8.60088   5
   4   7  -1 46.5656 8.49587   4
   4   7  -1 38.7384 8.68379   2
   4   7  -1 43.4970 8.37472   5
  -4  -7   1 41.0577 9.25008   5
  -4  -7   1 66.4266 10.5791   2
  -4  -7   1 56.8675 8.82747   5
  -4  -7   1 46.2700 9.62418   4
   3   7  -1 179.763 12.2527   5
   3   7  -1 187.495 8.42640   3
   3   7  -1 168.304 12.9145   4
   3   7  -1 178.495 11.3400   5
   3   7  -1 183.433 13.2766   2
   3   7  -1 174.584 9.75580   3
  -3  -7   1 174.291 12.8670   5
  -3  -7   1 165.761 11.0672   5
  -3  -7   1 196.230 14.5133   2
   2   7  -1 995.145 24.3830   3
   2   7  -1 971.530 22.8263   5
   2   7  -1 1007.09 23.7067   3
   2   7  -1 1026.64 25.6162   4
   2   7  -1 980.533 25.1811   2
   2   7  -1 992.286 22.6764   5
  -2  -7   1 992.574 22.0313   5
  -2  -7   1 991.286 27.0914   2
  -2  -7   1 1013.63 23.0975   5
   1   7  -1 40.4294 4.99014   5
   1   7  -1 39.5456 7.64483   3
   1   7  -1 37.4340 8.00261   3
   1   7  -1 29.9074 6.69200   4
   1   7  -1 38.2735 4.78718   5
   1   7  -1 49.3567 8.06794   2
  -1  -7   1 31.1674 8.54507   2
   0   7  -1 1532.71 33.3147   4
   0   7  -1 1548.05 34.7019   2
   0   7  -1 1556.40 37.1675   3
   0   7  -1 1514.04 37.2112   3
  -1   7  -1 86.9993 10.1522   2
  -1   7  -1 89.2206 11.8973   3
  -1   7  -1 78.3385 8.16199   4
  -1   7  -1 84.9256 11.3770   3
  -2   7  -1 625.006 22.9254   2
  -2   7  -1 609.992 25.5904   3
  -2   7  -1 590.278 25.5962   3
  -2   7  -1 622.542 20.0948   4
  -2   7  -1 608.815 17.9844   4
  -3   7  -1 141.139 12.9504   4
  -3   7  -1 150.381 10.7683   4
  -3   7  -1 144.777 13.7462   2
  -3   7  -1 147.982 18.7179   3
  -3   7  -1 159.112 19.6491   3
  -4   7  -1 24.0210 12.2656   3
  -4   7  -1 16.5712 7.85918   4
  -4   7  -1 31.7713 10.2667   2
  -4   7  -1 24.1267 15.0578   3
  -4   7  -1 22.4720 5.75313   5
   4  -7   1 16.1325 5.63623   5
  -5   7  -1 611.224 26.4445   2
  -5   7  -1 580.061 20.0480   4
  -5   7  -1 593.300 18.7255   5
  -5   7  -1 625.421 32.1367   3
  -5   7  -1 583.725 19.9279   5
  -5   7  -1 588.623 32.4295   3
   5  -7   1 580.893 18.0995   5
   5  -7   1 593.919 28.5596   2
   5  -7   1 609.240 18.6592   5
  -6   7  -1 440.429 18.6948   5
  -6   7  -1 404.295 31.4118   3
  -6   7  -1 414.182 17.6824   4
  -6   7  -1 384.285 24.5787   2
  -6   7  -1 438.264 20.0710   5
  -6   7  -1 444.531 33.2526   3
   6  -7   1 517.790 30.3645   2
   6  -7   1 416.010 18.5083   5
   6  -7   1 420.063 18.3396   5
  -7   7  -1 205.677 19.2198   5
  -7   7  -1 244.666 15.0855   4
  -7   7  -1 208.935 18.3144   5
  -7   7  -1 240.887 31.2897   3
  -7   7  -1 233.574 28.4620   3
   7  -7   1 260.891 19.0284   5
   7  -7   1 236.816 24.2498   2
   7  -7   1 205.952 17.4066   5
  -8   7  -1 35.2529 8.41948   4
  -8   7  -1 6.02412 18.7064   3
  -8   7  -1 24.2839 14.2091   5
  -8   7  -1 46.4488 22.7058   3
  -8   7  -1 45.7227 16.7552   2
  -8   7  -1 38.3792 13.0307   5
   8  -7   1 12.3680 12.0442   5
   8  -7   1 26.5416 13.0314   5
   8  -7   1 27.7731 20.5928   2
  -9   7  -1 64.7262 17.5186   5
  -9   7  -1 50.8691 28.5966   3
  -9   7  -1 32.8936 23.2718   3
  -9   7  -1 37.8279 20.3649   2
  -9   7  -1 72.4721 18.0918   5
   9  -7   1 54.1756 16.0441   5
   9  -7   1 54.0016 15.2733   5
   9  -7   1 101.477 27.2368   2
 -10   7  -1 108.804 29.8412   3
 -10   7  -1 148.398 22.8513   5
 -10   7  -1 131.952 24.5438   2
  10  -7   1 129.150 22.2621   5
  10  -7   1 124.501 20.5587   5
  10  -7   1 84.8028 29.9893   2
 -11   7  -1 35.0587 31.8115   3
 -11   7  -1 41.8934 26.2682   2
  11  -7   1 27.9803 20.6766   5
  11  -7   1 -5.8752 22.0718   5
 -12   7  -1 64.5441 35.6015   2
 -12   7  -1 91.2447 38.6136   3
  13   6  -1 217.368 30.3781   4
  13   6  -1 263.996 38.0959   5
  13   6  -1 204.138 40.0549   5
 -13  -6   1 345.823 44.9163   5
 -13  -6   1 214.940 35.0371   2
  12   6  -1 108.235 31.9388   5
  12   6  -1 144.551 25.7385   4
  12   6  -1 71.2479 29.0057   5
 -12  -6   1 62.6383 31.8649   5
 -12  -6   1 153.368 28.3723   2
 -12  -6   1 115.508 27.1811   5
  11   6  -1 175.704 22.8012   5
  11   6  -1 204.859 29.8874   5
  11   6  -1 183.873 26.4932   2
  11   6  -1 229.642 22.9348   4
 -11  -6   1 198.043 29.4572   5
 -11  -6   1 233.177 23.4741   4
 -11  -6   1 200.948 26.3645   2
 -11  -6   1 251.182 32.9918   5
  10   6  -1 239.115 20.6327   4
  10   6  -1 348.445 33.6930   5
  10   6  -1 265.103 31.4099   5
  10   6  -1 271.541 30.6560   2
 -10  -6   1 284.514 32.3162   2
 -10  -6   1 280.096 28.8936   5
 -10  -6   1 308.613 27.7564   4
 -10  -6   1 300.555 33.7380   5
   9   6  -1 96.7970 18.2599   5
   9   6  -1 102.112 20.3394   5
   9   6  -1 74.5546 17.1142   2
   9   6  -1 103.190 14.9950   4
  -9  -6   1 76.4184 18.0160   5
  -9  -6   1 57.7203 17.3133   5
  -9  -6   1 100.821 17.8899   2
  -9  -6   1 76.1602 14.8150   4
   8   6  -1 162.297 20.1967   5
   8   6  -1 114.535 13.8498   4
   8   6  -1 156.476 18.9065   5
   8   6  -1 151.685 16.6896   2
  -8  -6   1 125.635 19.7149   5
  -8  -6   1 149.344 15.2428   4
  -8  -6   1 147.798 17.4211   5
  -8  -6   1 153.812 17.5720   2
   7   6  -1 787.937 29.9068   5
   7   6  -1 818.754 28.2365   2
   7   6  -1 824.692 30.9499   5
   7   6  -1 779.289 26.3718   4
  -7  -6   1 795.386 31.8892   5
  -7  -6   1 774.449 28.3465   2
  -7  -6   1 816.665 27.7130   4
  -7  -6   1 770.579 29.6833   5
   6   6  -1 350.757 21.1826   4
   6   6  -1 423.244 21.5397   5
   6   6  -1 428.283 20.6815   2
  -6  -6   1 419.723 22.2129   5
  -6  -6   1 427.109 21.3451   5
  -6  -6   1 440.980 21.2667   2
  -6  -6   1 427.013 20.3137   4
   5   6  -1 1053.11 29.1339   5
   5   6  -1 1082.15 30.0488   5
   5   6  -1 999.513 27.6149   2
   5   6  -1 1062.32 27.5270   4
  -5  -6   1 1042.42 28.8964   5
  -5  -6   1 1020.62 28.6694   4
  -5  -6   1 1021.29 28.5620   2
   4   6  -1 951.648 25.3817   5
   4   6  -1 953.090 26.0775   5
   4   6  -1 931.493 24.8584   4
   4   6  -1 926.641 24.8528   2
  -4  -6   1 933.187 24.9218   5
  -4  -6   1 915.812 26.3285   5
  -4  -6   1 928.981 25.7643   2
  -4  -6   1 948.953 26.0435   4
   3   6  -1 386.397 14.3725   5
   3   6  -1 406.767 15.2349   5
   3   6  -1 390.264 15.2285   4
   3   6  -1 414.252 15.7323   2
  -3  -6   1 387.064 16.5605   4
  -3  -6   1 370.537 13.9660   5
  -3  -6   1 384.272 16.3934   2
  -3  -6   1 408.833 15.7521   5
   2   6  -1 128.096 9.18938   5
   2   6  -1 138.878 9.02859   3
   2   6  -1 117.168 8.23561   5
   2   6  -1 127.142 10.9149   2
   2   6  -1 122.121 10.1816   4
   2   6  -1 99.1034 9.36112   3
  -2  -6   1 116.138 12.0913   2
  -2  -6   1 108.791 9.34147   5
  -2  -6   1 123.345 8.48566   5
   1   6  -1 124.859 10.8940   2
   1   6  -1 133.658 6.97607   5
   1   6  -1 129.224 11.4875   3
   1   6  -1 128.344 10.0815   4
   1   6  -1 123.330 7.61044   5
  -1  -6   1 135.414 7.41642   5
  -1  -6   1 139.301 6.77601   5
  -1  -6   1 129.050 12.6632   2
   0   6  -1 96.0274 9.17853   4
   0   6  -1 100.161 12.2324   3
   0   6  -1 85.3275 9.01977   2
  -1   6  -1 1005.26 25.9080   2
  -1   6  -1 985.492 23.3099   4
  -1   6  -1 1005.31 28.7935   3
  -2   6  -1 376.843 14.8939   4
  -2   6  -1 387.327 17.6889   2
  -2   6  -1 371.829 20.1422   3
  -3   6  -1 589.796 14.1315   5
  -3   6  -1 549.978 18.1654   4
  -3   6  -1 625.245 26.1165   3
  -3   6  -1 583.436 21.7211   2
  -3   6  -1 623.915 14.9128   5
  -4   6  -1 4.48656 9.97439   3
  -4   6  -1 5.27912 8.96848   2
  -4   6  -1 5.46350 5.78441   5
  -4   6  -1 20.8383 11.1979   3
  -4   6  -1 2.59088 6.39679   4
  -4   6  -1 14.3083 5.30194   5
   4  -6   1 15.9321 5.57351   5
   4  -6   1 3.42430 5.12471   5
   4  -6   1 -7.6735 9.41441   2
  -5   6  -1 10.1529 6.86345   5
  -5   6  -1 1.52298 11.8910   3
  -5   6  -1 -6.6705 6.49774   4
  -5   6  -1 26.0545 11.6836   3
  -5   6  -1 6.57439 6.73655   5
  -5   6  -1 5.33737 9.68439   2
   5  -6   1 10.1662 7.10164   5
   5  -6   1 12.4968 6.95071   5
   5  -6   1 5.73595 11.5203   2
  -6   6  -1 138.984 14.3574   5
  -6   6  -1 108.294 17.2814   3
  -6   6  -1 157.005 20.8249   3
  -6   6  -1 110.299 14.4015   2
  -6   6  -1 118.380 11.9308   4
  -6   6  -1 116.526 14.3480   5
   6  -6   1 114.295 16.9784   2
   6  -6   1 116.472 13.8741   5
   6  -6   1 124.149 12.0643   5
  -7   6  -1 -5.4738 9.85615   5
  -7   6  -1 -0.0552 15.8088   3
  -7   6  -1 10.6403 12.2168   2
  -7   6  -1 14.2645 16.2020   3
  -7   6  -1 3.01954 7.09092   4
  -7   6  -1 -3.7145 10.3620   5
   7  -6   1 5.41834 11.0079   5
   7  -6   1 11.3046 14.8702   2
   7  -6   1 4.48982 9.12574   5
  -8   6  -1 18.8356 19.0368   3
  -8   6  -1 8.38622 12.5816   5
  -8   6  -1 -6.5330 13.6299   2
  -8   6  -1 -1.2170 6.84772   4
  -8   6  -1 7.50126 11.7047   5
  -8   6  -1 -31.088 16.2161   3
   8  -6   1 14.9098 12.6224   5
   8  -6   1 -20.803 17.0977   2
   8  -6   1 4.66245 11.8016   5
  -9   6  -1 -1.4714 6.59685   4
  -9   6  -1 14.1882 15.2264   5
  -9   6  -1 -22.815 20.1353   3
  -9   6  -1 4.33222 16.9088   5
  -9   6  -1 8.18715 23.6873   3
  -9   6  -1 -10.871 16.4586   2
   9  -6   1 -52.480 18.7782   2
   9  -6   1 12.8574 15.2946   5
   9  -6   1 16.3232 13.3117   5
 -10   6  -1 207.214 25.1502   5
 -10   6  -1 210.797 25.2348   2
 -10   6  -1 238.825 31.5106   3
 -10   6  -1 254.086 37.2845   3
 -10   6  -1 242.837 26.7212   5
  10  -6   1 218.053 26.5499   5
  10  -6   1 198.450 21.5357   5
  10  -6   1 195.837 32.5574   2
 -11   6  -1 147.950 27.5632   5
 -11   6  -1 112.740 24.8509   2
 -11   6  -1 87.8082 29.9831   3
  11  -6   1 127.236 21.1235   5
  11  -6   1 89.6320 22.4335   5
 -12   6  -1 119.709 30.0972   2
 -12   6  -1 96.0085 36.4210   3
  12  -6   1 56.0405 24.3211   5
  13   5  -1 113.705 28.7099   4
  13   5  -1 -4.9487 30.1856   5
  13   5  -1 118.279 40.7874   5
 -13  -5   1 44.5665 35.9046   5
 -13  -5   1 103.217 31.5471   2
  12   5  -1 24.4889 19.4278   5
  12   5  -1 26.9533 21.2808   4
  12   5  -1 10.7411 25.1249   5
 -12  -5   1 -12.713 26.0845   5
 -12  -5   1 72.8575 17.5600   3
 -12  -5   1 94.2785 37.3285   5
 -12  -5   1 -18.850 24.3625   2
 -12  -5   1 -15.243 15.0699   3
  11   5  -1 -21.927 20.7213   2
  11   5  -1 4.35899 21.3066   5
  11   5  -1 -16.171 16.0700   5
  11   5  -1 31.3463 16.4585   4
 -11  -5   1 33.0995 15.0567   3
 -11  -5   1 8.46301 19.9652   2
 -11  -5   1 -16.493 12.5077   3
 -11  -5   1 1.85204 16.2175   4
 -11  -5   1 8.86063 22.9030   5
 -11  -5   1 -3.6569 21.0142   5
  10   5  -1 107.920 20.5281   2
  10   5  -1 156.740 28.5599   5
  10   5  -1 135.750 16.8204   4
  10   5  -1 81.9027 14.3145   5
 -10  -5   1 121.257 24.9521   5
 -10  -5   1 98.1312 13.8743   3
 -10  -5   1 115.053 20.6890   5
 -10  -5   1 86.4641 19.9308   2
 -10  -5   1 94.6291 16.2881   4
 -10  -5   1 117.630 12.8528   3
   9   5  -1 316.308 26.7859   5
   9   5  -1 309.477 22.3018   4
   9   5  -1 315.370 26.5270   2
   9   5  -1 268.753 25.8291   5
  -9  -5   1 281.355 28.7066   5
  -9  -5   1 334.816 22.4460   4
  -9  -5   1 291.166 17.9074   3
  -9  -5   1 267.501 26.9730   5
  -9  -5   1 296.211 16.5418   3
  -9  -5   1 282.599 26.5815   2
   8   5  -1 64.7722 16.8888   5
   8   5  -1 62.0512 13.7936   2
   8   5  -1 62.2989 11.7035   4
   8   5  -1 73.4491 17.6267   5
  -8  -5   1 68.5535 15.0922   5
  -8  -5   1 65.2941 11.7458   4
  -8  -5   1 60.3513 8.35084   3
  -8  -5   1 59.7586 9.01127   3
  -8  -5   1 61.2679 14.8180   5
  -8  -5   1 55.4083 13.7554   2
   7   5  -1 -0.3887 9.63677   2
   7   5  -1 4.93300 10.6239   5
   7   5  -1 -8.6617 8.90612   5
  -7  -5   1 8.50850 11.0711   5
  -7  -5   1 7.76020 9.96412   2
  -7  -5   1 14.2805 11.4646   5
  -7  -5   1 6.04485 8.82405   4
   6   5  -1 1514.02 38.3313   5
   6   5  -1 1496.73 36.5364   2
   6   5  -1 1490.17 39.0003   5
   6   5  -1 1507.45 34.5514   4
  -6  -5   1 1501.17 35.4676   4
  -6  -5   1 1464.37 39.3834   5
  -6  -5   1 1451.81 37.5673   5
  -6  -5   1 1518.24 36.9671   2
   5   5  -1 2442.51 48.9268   4
   5   5  -1 2431.24 52.4510   5
   5   5  -1 2517.35 49.8938   2
   5   5  -1 2494.31 51.9542   5
  -5  -5   1 2464.35 52.7912   5
  -5  -5   1 2495.60 50.3995   2
  -5  -5   1 2465.55 49.9005   4
  -5  -5   1 2488.06 51.3898   5
   4   5  -1 357.291 15.0172   5
   4   5  -1 342.742 14.1931   4
   4   5  -1 359.913 15.8488   5
   4   5  -1 334.645 14.7241   2
  -4  -5   1 346.808 15.6423   2
  -4  -5   1 356.937 15.2588   4
  -4  -5   1 341.382 14.9901   5
   3   5  -1 269.829 13.0177   2
   3   5  -1 269.094 12.6441   5
   3   5  -1 282.256 12.1129   5
   3   5  -1 275.438 12.4221   4
  -3  -5   1 269.164 13.5415   2
  -3  -5   1 268.186 13.4619   5
  -3  -5   1 284.758 13.3417   4
  -3  -5   1 290.326 12.3596   5
   2   5  -1 1331.52 26.8754   5
   2   5  -1 1250.21 27.8383   4
   2   5  -1 1315.58 28.0929   2
   2   5  -1 1309.36 27.1305   5
   2   5  -1 1292.80 25.8378   3
  -2  -5   1 1304.65 27.2621   5
  -2  -5   1 1267.39 26.3573   5
  -2  -5   1 1326.69 28.9420   2
  -2  -5   1 1342.70 29.2054   4
   1   5  -1 46.6705 4.71056   5
   1   5  -1 34.6098 5.46526   4
   1   5  -1 44.1317 6.23227   3
   1   5  -1 41.9350 6.38464   2
   1   5  -1 44.7278 5.21908   5
  -1  -5   1 44.3006 7.09926   2
  -1  -5   1 48.0399 5.72985   5
  -1  -5   1 43.7556 5.30214   5
   0   5  -1 104.311 10.8293   3
   0   5  -1 101.184 9.72874   2
   0   5  -1 107.990 8.50331   4
  -1   5  -1 360.180 16.4131   3
  -1   5  -1 365.396 12.4030   4
  -2   5  -1 709.216 24.3122   3
  -2   5  -1 735.064 21.7338   2
  -2   5  -1 701.739 18.8004   4
  -3   5  -1 4.54498 5.72180   4
  -3   5  -1 8.88033 7.12227   2
  -3   5  -1 13.0598 4.27363   5
  -3   5  -1 7.10946 4.11784   5
  -3   5  -1 11.9421 8.31281   3
   3  -5   1 8.49426 4.09279   5
   3  -5   1 20.5253 8.23159   2
   3  -5   1 13.4985 4.40955   5
  -4   5  -1 19.3267 6.24710   4
  -4   5  -1 19.4687 5.68022   5
  -4   5  -1 9.60410 8.16643   2
  -4   5  -1 19.6218 10.5608   3
  -4   5  -1 30.0180 6.06006   5
   4  -5   1 22.0621 5.96283   5
   4  -5   1 23.7059 9.32310   2
   4  -5   1 20.5284 5.71521   5
  -5   5  -1 119.221 10.5450   4
  -5   5  -1 119.954 11.6536   5
  -5   5  -1 125.800 11.3638   5
  -5   5  -1 127.712 12.7991   2
  -5   5  -1 129.641 16.3930   3
  -5   5  -1 133.104 16.2755   3
   5  -5   1 137.446 14.3489   2
   5  -5   1 131.810 11.2466   5
   5  -5   1 127.745 11.4674   5
  -6   5  -1 34.0849 6.81650   4
  -6   5  -1 18.8924 10.7075   2
  -6   5  -1 25.5411 12.2155   3
  -6   5  -1 20.4021 8.80223   5
  -6   5  -1 38.2300 14.4655   3
  -6   5  -1 24.7436 8.44506   5
   6  -5   1 41.1003 7.38583   4
   6  -5   1 48.9577 12.8560   2
   6  -5   1 41.4560 9.10594   5
   6  -5   1 24.6030 8.33078   5
  -7   5  -1 7.91727 6.24952   4
  -7   5  -1 5.50730 14.3515   3
  -7   5  -1 12.0361 15.1231   3
  -7   5  -1 -6.0556 10.5346   2
  -7   5  -1 14.6229 9.62588   5
  -7   5  -1 8.15449 9.73086   5
   7  -5   1 3.78720 8.82909   5
   7  -5   1 1.91011 12.0397   2
   7  -5   1 10.6376 10.2956   5
   7  -5   1 38.3590 7.60404   4
  -8   5  -1 17.1108 12.4432   5
  -8   5  -1 11.3516 17.1035   3
  -8   5  -1 15.4254 12.3659   5
  -8   5  -1 13.4617 6.40241   4
  -8   5  -1 -2.5424 17.0261   3
  -8   5  -1 21.2030 14.6868   2
   8  -5   1 2.03469 11.0452   5
   8  -5   1 22.2456 7.90652   4
   8  -5   1 3.89110 15.7871   2
  -9   5  -1 25.7219 15.9919   5
  -9   5  -1 38.7585 7.24918   4
  -9   5  -1 21.0129 22.8756   3
  -9   5  -1 29.2179 18.2034   3
  -9   5  -1 42.0440 16.4516   2
  -9   5  -1 31.9313 14.6285   5
   9  -5   1 32.5020 15.9279   5
   9  -5   1 71.4554 17.2857   5
   9  -5   1 56.6082 9.86178   4
   9  -5   1 62.0785 20.4137   2
 -10   5  -1 225.371 33.0749   3
 -10   5  -1 184.907 27.1464   5
 -10   5  -1 169.187 26.6246   3
 -10   5  -1 197.817 23.9724   2
 -10   5  -1 148.733 21.3755   5
  10  -5   1 153.484 21.5210   5
  10  -5   1 224.160 29.5242   2
  10  -5   1 231.919 24.2063   5
 -11   5  -1 75.0706 33.5587   3
 -11   5  -1 56.7384 29.6532   3
 -11   5  -1 38.2447 23.5757   5
 -11   5  -1 86.0177 26.6491   5
 -11   5  -1 50.1356 22.2972   2
  11  -5   1 56.2821 19.7289   5
 -12   5  -1 -8.6103 30.6302   3
 -12   5  -1 1.93908 26.5084   2
  12  -5   1 -17.529 23.1380   5
  13   4  -1 69.4534 26.1119   4
  13   4  -1 12.1700 32.7408   5
  13   4  -1 8.71103 27.4645   5
 -13  -4   1 -54.888 32.0168   5
 -13  -4   1 42.6491 33.0171   5
 -13  -4   1 6.36187 27.3216   2
  12   4  -1 59.0515 20.1437   4
  12   4  -1 73.8251 29.6222   5
  12   4  -1 29.7119 25.4437   5
 -12  -4   1 23.1022 18.2296   3
 -12  -4   1 41.6852 23.0579   2
 -12  -4   1 10.7992 29.3470   5
 -12  -4   1 47.6317 18.2384   4
 -12  -4   1 -4.7878 26.0748   5
 -12  -4   1 69.2882 22.3064   3
  11   4  -1 288.790 27.2502   4
  11   4  -1 259.336 29.1880   2
  11   4  -1 265.169 30.2569   5
  11   4  -1 304.664 31.2619   5
 -11  -4   1 303.446 33.4362   2
 -11  -4   1 235.213 28.2003   5
 -11  -4   1 254.814 23.9023   3
 -11  -4   1 199.927 29.3663   5
 -11  -4   1 254.298 28.6943   3
 -11  -4   1 286.712 26.4405   4
  10   4  -1 25.1475 23.6677   5
  10   4  -1 26.1773 17.5067   2
  10   4  -1 -0.0772 12.4284   4
  10   4  -1 3.34239 13.5655   5
 -10  -4   1 19.8981 11.9386   3
 -10  -4   1 -15.672 16.0711   2
 -10  -4   1 8.75996 13.3025   3
 -10  -4   1 -16.594 11.9239   4
 -10  -4   1 34.1417 16.9420   5
 -10  -4   1 32.8107 24.5625   5
   9   4  -1 36.6779 14.8130   2
   9   4  -1 27.5763 13.2855   5
   9   4  -1 53.1547 35.4355   5
   9   4  -1 38.7715 11.5104   4
  -9  -4   1 47.0032 11.7143   4
  -9  -4   1 28.3357 11.8387   3
  -9  -4   1 54.5910 16.2869   5
  -9  -4   1 36.7619 10.7081   3
  -9  -4   1 29.9524 16.7488   2
  -9  -4   1 51.0285 16.3683   5
   8   4  -1 -11.323 7.75189   5
   8   4  -1 6.19103 11.8729   5
   8   4  -1 -1.0684 11.4439   2
   8   4  -1 -4.4114 9.81415   4
  -8  -4   1 -10.428 7.77667   3
  -8  -4   1 0.91031 12.5350   5
  -8  -4   1 12.1590 9.10866   3
  -8  -4   1 2.66654 12.1019   5
  -8  -4   1 7.77483 9.10485   4
  -8  -4   1 -0.5909 11.3863   2
   7   4  -1 10.0857 8.24330   5
   7   4  -1 2.95996 7.40744   4
   7   4  -1 12.2702 9.85820   2
   7   4  -1 14.7872 9.14852   5
  -7  -4   1 13.2962 10.3298   5
  -7  -4   1 16.0289 9.32073   2
  -7  -4   1 15.7342 6.96331   3
  -7  -4   1 -5.4846 10.1491   5
  -7  -4   1 7.17903 7.73963   4
  -7  -4   1 18.0515 7.18786   3
   6   4  -1 104.205 11.3456   2
   6   4  -1 78.3318 9.20628   5
   6   4  -1 102.417 12.1124   5
   6   4  -1 111.078 9.78808   4
  -6  -4   1 88.4116 11.4253   5
  -6  -4   1 89.9330 12.3872   5
  -6  -4   1 87.3908 9.37801   3
  -6  -4   1 107.310 9.98743   4
  -6  -4   1 100.984 8.93121   3
  -6  -4   1 96.9197 11.2177   2
   5   4  -1 79.6915 8.98661   2
   5   4  -1 47.1624 7.42631   5
   5   4  -1 73.3302 7.70458   4
   5   4  -1 88.6639 10.3386   5
  -5  -4   1 77.2146 8.33534   4
  -5  -4   1 79.5163 10.0116   5
  -5  -4   1 70.4350 10.6336   5
  -5  -4   1 71.1898 9.23468   2
   4   4  -1 1413.75 30.1698   4
   4   4  -1 1422.24 32.0901   5
   4   4  -1 1404.47 32.6223   5
   4   4  -1 1379.02 30.6876   2
  -4  -4   1 1411.37 31.8522   5
  -4  -4   1 1383.38 30.5395   4
  -4  -4   1 1359.12 32.5725   5
  -4  -4   1 1432.82 31.4178   2
   3   4  -1 20.5167 5.76451   2
   3   4  -1 18.9007 5.71265   5
   3   4  -1 21.4483 4.85743   4
   3   4  -1 25.4376 6.03529   5
  -3  -4   1 19.1152 6.06066   2
  -3  -4   1 21.1007 5.32249   4
  -3  -4   1 23.2611 5.83565   5
   2   4  -1 729.300 15.0286   3
   2   4  -1 728.761 17.1470   5
   2   4  -1 701.662 17.3011   5
   2   4  -1 701.394 17.5526   4
   2   4  -1 701.328 17.6926   2
  -2  -4   1 723.769 16.9498   5
  -2  -4   1 696.113 17.6335   5
  -2  -4   1 696.758 18.1553   4
  -2  -4   1 735.233 18.3201   2
   1   4  -1 1277.61 24.0193   5
   1   4  -1 1239.54 25.8499   4
   1   4  -1 1263.73 26.0334   2
   1   4  -1 1249.65 25.5856   3
   1   4  -1 1272.90 23.6952   5
  -1  -4   1 1253.64 26.6753   2
  -1  -4   1 1262.45 23.5351   5
  -1  -4   1 1262.86 23.9899   5
   0   4  -1 311.598 12.8083   3
   0   4  -1 310.510 10.7136   4
   0   4  -1 292.192 11.6186   2
  -1   4  -1 2348.48 47.1510   3
  -1   4  -1 2345.65 43.3595   4
  -2   4  -1 1828.03 35.3364   4
  -2   4  -1 1844.92 32.5769   5
  -2   4  -1 1827.23 38.0767   2
  -2   4  -1 1851.68 32.2399   5
  -2   4  -1 1871.33 41.1433   3
   2  -4   1 1829.20 31.9328   5
  -3   4  -1 4681.19 80.5272   5
  -3   4  -1 4739.26 89.4610   3
  -3   4  -1 4774.62 85.1193   2
  -3   4  -1 4818.92 81.1731   4
  -3   4  -1 4711.32 79.9706   5
   3  -4   1 4644.09 79.8297   5
   3  -4   1 4688.46 79.9921   5
   3  -4   1 4686.64 85.5303   2
  -4   4  -1 123.591 12.8327   2
  -4   4  -1 112.011 13.4283   3
  -4   4  -1 118.149 9.57251   5
  -4   4  -1 131.806 9.20250   4
  -4   4  -1 116.333 9.37063   5
   4  -4   1 119.562 9.46292   5
   4  -4   1 115.826 9.25938   4
   4  -4   1 122.533 9.53269   5
   4  -4   1 130.401 13.8882   2
  -5   4  -1 456.040 16.5232   5
  -5   4  -1 463.467 24.4871   3
  -5   4  -1 465.767 19.9038   2
  -5   4  -1 474.156 14.1608   4
  -5   4  -1 453.415 24.2743   3
  -5   4  -1 459.782 17.1862   5
   5  -4   1 436.741 14.3969   4
   5  -4   1 500.038 21.8035   2
   5  -4   1 490.340 17.2677   5
   5  -4   1 470.593 16.6852   5
  -6   4  -1 207.292 14.4531   5
  -6   4  -1 199.175 14.8011   5
  -6   4  -1 194.173 21.4905   3
  -6   4  -1 219.362 22.4575   3
  -6   4  -1 226.678 17.6031   2
  -6   4  -1 220.823 10.9596   4
   6  -4   1 219.703 11.9028   4
   6  -4   1 211.500 14.8951   5
   6  -4   1 220.775 20.3472   2
   6  -4   1 204.681 15.4509   5
  -7   4  -1 735.871 25.6911   5
  -7   4  -1 789.762 27.4419   5
  -7   4  -1 798.255 28.7756   2
  -7   4  -1 764.563 33.9161   3
  -7   4  -1 729.318 35.2604   3
  -7   4  -1 773.268 18.6560   4
   7  -4   1 747.451 31.3612   2
   7  -4   1 745.841 26.0409   5
   7  -4   1 776.587 20.6360   4
   7  -4   1 723.960 26.6776   5
  -8   4  -1 52.9489 16.6804   3
  -8   4  -1 86.2215 7.86551   4
  -8   4  -1 73.4320 13.8329   5
  -8   4  -1 88.5069 15.1402   2
  -8   4  -1 85.5218 20.7755   3
  -8   4  -1 90.6531 13.4761   5
   8  -4   1 96.0813 14.7609   5
   8  -4   1 87.1179 9.72445   4
   8  -4   1 81.4630 17.7244   2
   8  -4   1 75.4077 12.9788   5
  -9   4  -1 332.824 27.8863   2
  -9   4  -1 288.526 35.2696   3
  -9   4  -1 332.678 34.3659   3
  -9   4  -1 286.985 26.6348   5
  -9   4  -1 329.482 27.3763   5
  -9   4  -1 305.410 13.2665   4
   9  -4   1 364.569 31.6357   2
   9  -4   1 291.503 25.1326   5
   9  -4   1 283.168 17.0695   4
 -10   4  -1 181.263 26.5856   3
 -10   4  -1 230.052 30.7173   3
 -10   4  -1 184.068 13.0115   4
 -10   4  -1 192.175 23.6358   5
 -10   4  -1 190.574 23.7536   5
 -10   4  -1 194.905 23.6080   2
  10  -4   1 180.739 17.3209   4
  10  -4   1 220.574 25.3310   5
  10  -4   1 191.707 27.1444   2
 -11   4  -1 134.454 27.9034   5
 -11   4  -1 134.150 29.2550   3
 -11   4  -1 121.806 33.4058   3
 -11   4  -1 146.527 23.7903   2
 -11   4  -1 189.684 13.8660   4
 -11   4  -1 178.233 28.9964   5
  11  -4   1 159.747 24.6053   5
  11  -4   1 130.946 29.6921   2
  11  -4   1 158.371 13.7146   4
 -12   4  -1 -5.9546 29.7428   3
 -12   4  -1 -1.9627 23.4133   5
 -12   4  -1 -4.7400 21.9994   2
  12  -4   1 0.49040 23.2257   5
 -13   4  -1 45.1957 35.8428   3
  13  -4   1 67.4132 32.9881   5
  13   3  -1 52.0632 24.6588   5
  13   3  -1 21.1175 30.5057   5
  13   3  -1 63.3950 24.2998   4
 -13  -3   1 96.4079 39.8840   5
 -13  -3   1 8.98276 34.2973   5
 -13  -3   1 81.0412 23.8781   3
 -13  -3   1 70.1669 28.3892   2
  12   3  -1 -6.4061 23.3794   5
  12   3  -1 53.2617 27.6286   5
  12   3  -1 19.8052 18.0480   4
 -12  -3   1 -38.505 25.4257   5
 -12  -3   1 6.52160 18.1054   3
 -12  -3   1 5.75367 28.4461   5
 -12  -3   1 -20.371 16.0204   4
 -12  -3   1 13.9714 23.4932   3
 -12  -3   1 11.9411 21.8457   2
  11   3  -1 30.8804 15.1198   4
  11   3  -1 34.7340 22.2447   2
  11   3  -1 14.4192 19.4097   5
  11   3  -1 44.2719 19.6527   5
 -11  -3   1 53.6233 19.7748   5
 -11  -3   1 16.1169 19.1131   2
 -11  -3   1 57.5243 20.1187   3
 -11  -3   1 33.7446 13.9456   4
 -11  -3   1 41.3287 23.1138   5
 -11  -3   1 31.0017 16.3544   3
  10   3  -1 36.8297 13.3672   4
  10   3  -1 66.1511 17.3271   5
  10   3  -1 13.1796 15.9950   2
  10   3  -1 15.3202 14.7236   5
 -10  -3   1 20.0822 17.1045   2
 -10  -3   1 16.6054 16.6284   5
 -10  -3   1 32.4701 14.9990   3
 -10  -3   1 1.58153 12.8798   3
 -10  -3   1 36.1092 17.5768   5
 -10  -3   1 22.9079 11.4782   4
   9   3  -1 21.3545 9.47392   4
   9   3  -1 21.3700 15.1152   5
   9   3  -1 30.8533 14.8255   5
   9   3  -1 17.0887 13.6202   2
  -9  -3   1 3.35079 14.2138   5
  -9  -3   1 19.4106 12.5108   3
  -9  -3   1 85.3188 27.5535   5
  -9  -3   1 20.0284 10.3960   4
  -9  -3   1 34.3947 11.9445   3
   8   3  -1 38.7721 13.0185   5
   8   3  -1 23.9662 11.9457   2
   8   3  -1 28.0755 8.67396   4
   8   3  -1 19.6615 8.94730   5
  -8  -3   1 14.7596 12.6421   5
  -8  -3   1 28.3134 10.7363   3
  -8  -3   1 27.3247 8.98921   4
  -8  -3   1 25.8275 12.5007   5
  -8  -3   1 36.7119 9.73921   3
  -8  -3   1 16.2451 11.8689   2
   7   3  -1 3.97931 9.90919   5
   7   3  -1 7.70119 6.95762   4
   7   3  -1 0.62553 9.58978   2
   7   3  -1 -0.0363 9.21186   5
  -7  -3   1 11.2032 6.75641   4
  -7  -3   1 1.26095 7.46934   3
  -7  -3   1 -0.2718 7.51190   3
  -7  -3   1 8.74418 9.75670   2
  -7  -3   1 -13.712 8.93480   5
  -7  -3   1 12.1438 17.7980   5
   6   3  -1 -0.2148 8.04502   5
   6   3  -1 1.09149 5.55795   4
   6   3  -1 11.9888 7.13793   2
   6   3  -1 -5.7165 6.59799   5
  -6  -3   1 3.73416 7.94970   5
  -6  -3   1 -2.2264 5.96577   3
  -6  -3   1 -0.7015 5.78696   4
  -6  -3   1 3.20421 8.39860   5
  -6  -3   1 2.56751 5.71263   3
  -6  -3   1 8.49787 8.18508   2
   5   3  -1 158.176 13.5667   5
   5   3  -1 161.148 12.0162   2
   5   3  -1 170.710 12.7805   5
   5   3  -1 157.627 10.4136   4
  -5  -3   1 157.648 12.5797   2
  -5  -3   1 157.724 9.17293   3
  -5  -3   1 142.461 14.3071   5
  -5  -3   1 163.987 10.7945   4
  -5  -3   1 137.823 12.4817   5
   4   3  -1 34.5139 6.98799   5
   4   3  -1 29.8902 5.42615   4
   4   3  -1 26.5824 6.27849   2
   4   3  -1 31.2315 7.05027   5
  -4  -3   1 28.0497 6.54127   5
  -4  -3   1 28.5058 5.76015   4
  -4  -3   1 31.3599 6.72266   2
  -4  -3   1 28.7028 7.37661   5
   3   3  -1 5.11899 4.37858   2
   3   3  -1 -1.0761 4.86866   5
   3   3  -1 2.16897 5.19957   5
   3   3  -1 -0.8328 3.82218   4
  -3  -3   1 -4.2012 4.76447   2
  -3  -3   1 1.73378 4.69703   5
  -3  -3   1 1.71454 4.16838   4
  -3  -3   1 -1.8424 4.70445   5
   2   3  -1 2181.10 40.6676   5
   2   3  -1 2222.98 40.2677   4
   2   3  -1 2233.83 40.4747   5
   2   3  -1 2230.35 40.4793   2
  -2  -3   1 2222.71 40.7164   2
  -2  -3   1 2232.49 40.3555   5
  -2  -3   1 2121.58 40.4562   4
   1   3  -1 1269.58 25.3452   2
   1   3  -1 1287.59 24.4889   3
   1   3  -1 1272.08 25.2027   4
   1   3  -1 1310.61 24.1455   5
   1   3  -1 1288.66 23.7271   5
  -1  -3   1 1301.60 23.7583   5
  -1  -3   1 1277.87 25.6822   2
   0   3  -1 1594.68 30.6251   2
   0   3  -1 1620.04 31.5541   3
   0  -3   1 1589.74 30.9304   2
  -1   3  -1 1911.28 37.1086   2
  -1   3  -1 1943.63 38.8510   3
  -1   3  -1 1949.13 35.6112   4
  -2   3  -1 271.906 12.3059   2
  -2   3  -1 282.891 8.20412   5
  -2   3  -1 276.400 8.40562   5
  -2   3  -1 281.587 9.96482   4
  -2   3  -1 280.755 14.2508   3
   2  -3   1 282.404 12.6853   2
   2  -3   1 279.098 9.76125   4
   2  -3   1 275.191 8.21934   5
   2  -3   1 282.149 8.41098   5
  -3   3  -1 680.688 16.2330   5
  -3   3  -1 656.587 16.5884   5
  -3   3  -1 656.843 15.8935   4
  -3   3  -1 668.438 19.6166   2
  -3   3  -1 673.863 22.5125   3
   3  -3   1 682.629 16.0454   4
   3  -3   1 674.585 16.2726   5
   3  -3   1 684.393 20.2198   2
   3  -3   1 681.861 16.4458   5
  -4   3  -1 293.196 14.9397   2
  -4   3  -1 316.168 10.8778   4
  -4   3  -1 294.634 11.8951   5
  -4   3  -1 316.590 18.2461   3
  -4   3  -1 290.271 12.4458   5
   4  -3   1 292.661 11.1080   4
   4  -3   1 278.963 15.4041   2
   4  -3   1 294.182 12.1524   5
   4  -3   1 254.650 14.1292   5
  -5   3  -1 199.166 12.8507   5
  -5   3  -1 243.985 10.0133   4
  -5   3  -1 242.692 15.1615   2
  -5   3  -1 218.116 12.5473   5
  -5   3  -1 219.061 18.5034   3
   5  -3   1 202.539 12.5708   5
   5  -3   1 241.811 16.1398   2
   5  -3   1 205.547 10.9743   4
   5  -3   1 220.887 12.9529   5
  -6   3  -1 883.701 31.8021   3
  -6   3  -1 868.455 27.3253   2
  -6   3  -1 871.961 26.4541   5
  -6   3  -1 888.217 19.8205   4
  -6   3  -1 861.048 32.2583   3
  -6   3  -1 854.637 25.0297   5
   6  -3   1 857.734 28.6521   2
   6  -3   1 871.944 21.3981   4
   6  -3   1 846.065 25.5676   5
  -7   3  -1 114.380 16.0496   3
  -7   3  -1 145.974 14.2064   2
  -7   3  -1 119.798 9.25862   4
  -7   3  -1 137.407 15.5508   5
  -7   3  -1 121.664 16.4095   5
   7  -3   1 147.013 12.3073   4
   7  -3   1 136.195 15.5778   2
   7  -3   1 158.442 16.2671   5
  -8   3  -1 425.542 31.5381   3
  -8   3  -1 409.136 24.8201   5
  -8   3  -1 429.673 14.0377   4
  -8   3  -1 403.913 23.0664   5
  -8   3  -1 458.090 24.8079   2
  -8   3  -1 393.308 28.4388   3
   8  -3   1 394.463 16.7916   4
   8  -3   1 394.718 28.3740   5
   8  -3   1 403.907 26.9387   2
   8  -3   1 425.203 23.2949   5
  -9   3  -1 -10.186 18.7701   3
  -9   3  -1 4.52934 13.7495   2
  -9   3  -1 14.8322 16.0473   5
  -9   3  -1 4.19574 15.3283   3
  -9   3  -1 19.6489 25.2091   5
  -9   3  -1 10.8664 6.73344   4
   9  -3   1 3.72929 12.6854   5
   9  -3   1 14.2944 9.50691   4
   9  -3   1 13.0840 12.2814   5
   9  -3   1 9.22012 15.7230   2
 -10   3  -1 395.359 35.1589   3
 -10   3  -1 371.045 15.7185   4
 -10   3  -1 377.894 30.7270   2
 -10   3  -1 384.277 40.0623   3
 -10   3  -1 293.344 31.6271   5
 -10   3  -1 366.971 31.9460   5
  10  -3   1 339.738 29.9351   5
  10  -3   1 368.982 20.3782   4
  10  -3   1 363.204 34.7794   2
  10  -3   1 354.031 28.5721   5
 -11   3  -1 61.1119 21.6090   5
 -11   3  -1 89.0616 25.2941   5
 -11   3  -1 58.5225 28.4751   3
 -11   3  -1 58.4850 9.93543   4
 -11   3  -1 99.5399 27.3621   3
 -11   3  -1 52.0085 19.0578   2
  11  -3   1 103.132 27.9120   2
  11  -3   1 56.2741 20.5422   5
  11  -3   1 92.6176 14.1875   4
  11  -3   1 95.3759 22.3743   5
 -12   3  -1 22.9079 26.9810   5
 -12   3  -1 20.5301 32.9405   3
 -12   3  -1 -13.085 25.5669   5
 -12   3  -1 -13.287 19.9410   2
 -12   3  -1 9.30629 10.6590   4
 -12   3  -1 -10.421 27.9677   3
  12  -3   1 -18.343 14.3455   4
  12  -3   1 26.2182 24.7948   5
  12  -3   1 9.78434 21.3382   5
 -13   3  -1 20.9382 33.5432   3
 -13   3  -1 9.61242 27.3507   2
  13  -3   1 -22.905 25.3174   5
  13   2  -1 -16.443 28.7983   5
  13   2  -1 20.8204 21.8071   4
  13   2  -1 47.1250 29.6359   5
 -13  -2   1 -19.995 30.6256   5
 -13  -2   1 -66.349 26.3905   2
 -13  -2   1 -13.906 25.7263   3
 -13  -2   1 -13.793 30.2665   3
 -13  -2   1 50.9976 36.3674   5
  12   2  -1 36.0315 23.8600   5
  12   2  -1 -8.2337 17.1622   4
  12   2  -1 12.3765 20.3410   5
 -12  -2   1 10.2106 20.7189   3
 -12  -2   1 2.04441 15.7367   4
 -12  -2   1 3.25389 22.8764   5
 -12  -2   1 -15.167 21.8447   2
 -12  -2   1 6.07703 24.5908   3
 -12  -2   1 -1.2809 27.0280   5
  11   2  -1 -18.386 20.3742   2
  11   2  -1 35.4398 22.7540   5
  11   2  -1 29.6299 14.6134   4
  11   2  -1 8.92979 19.3037   5
 -11  -2   1 34.4869 17.8030   3
 -11  -2   1 56.7217 32.1986   5
 -11  -2   1 45.9364 19.4478   2
 -11  -2   1 31.9485 13.4905   4
 -11  -2   1 38.5227 20.8263   3
 -11  -2   1 47.9912 40.3701   5
  10   2  -1 52.9998 16.7251   2
  10   2  -1 -8.1469 16.0853   5
  10   2  -1 -4.2768 11.1631   4
  10   2  -1 3.88135 10.5586   5
 -10  -2   1 7.35460 10.5722   4
 -10  -2   1 -9.2180 15.1292   5
 -10  -2   1 -8.4497 13.7034   3
 -10  -2   1 -1.5675 15.7428   3
 -10  -2   1 -6.4036 15.0245   2
 -10  -2   1 4.16171 17.3759   5
   9   2  -1 829.055 26.3295   4
   9   2  -1 1049.72 43.4362   5
   9   2  -1 778.156 32.9198   2
   9   2  -1 844.213 33.3430   5
  -9  -2   1 841.613 36.8541   5
  -9  -2   1 857.040 25.8188   4
  -9  -2   1 800.008 30.8699   3
  -9  -2   1 877.645 34.8338   5
  -9  -2   1 822.882 32.7176   3
  -9  -2   1 792.096 35.4715   2
   8   2  -1 70.8141 12.9082   5
   8   2  -1 82.8595 9.95249   4
   8   2  -1 78.0729 13.6384   5
   8   2  -1 95.1612 12.9211   2
  -8  -2   1 85.0730 14.6386   5
  -8  -2   1 85.4299 12.7352   2
  -8  -2   1 101.976 12.8899   3
  -8  -2   1 113.038 21.3619   5
  -8  -2   1 78.5024 13.3464   3
  -8  -2   1 98.4942 10.0661   4
   7   2  -1 186.430 21.2166   5
   7   2  -1 111.584 11.3197   4
  -7  -2   1 104.336 13.3539   5
  -7  -2   1 117.519 12.9009   2
  -7  -2   1 129.343 14.1596   3
  -7  -2   1 113.165 12.3377   3
  -7  -2   1 152.395 11.8507   4
  -7  -2   1 109.938 14.0914   5
   6   2  -1 34.8960 8.56949   2
   6   2  -1 18.5582 7.29549   5
   6   2  -1 13.1881 5.65091   4
   6   2  -1 23.0368 9.09752   5
  -6  -2   1 10.8912 8.54511   5
  -6  -2   1 16.7310 5.90929   4
  -6  -2   1 16.7639 6.98737   3
  -6  -2   1 18.3012 7.87951   5
  -6  -2   1 19.6560 7.44031   2
   5   2  -1 50.9573 9.09044   5
   5   2  -1 45.2784 6.07863   4
   5   2  -1 33.4909 6.94380   2
   5   2  -1 32.2460 6.94588   5
  -5  -2   1 27.9725 5.97134   4
  -5  -2   1 35.0465 7.53234   5
  -5  -2   1 34.2640 7.64733   2
  -5  -2   1 44.9874 9.04745   5
  -5  -2   1 37.2118 6.38164   3
   4   2  -1 222.723 11.9603   5
   4   2  -1 222.530 9.66184   4
   4   2  -1 219.500 11.3505   2
   4   2  -1 286.096 16.0564   5
  -4  -2   1 215.924 12.8727   5
  -4  -2   1 240.260 11.6042   2
  -4  -2   1 218.592 12.1710   5
  -4  -2   1 234.255 9.78128   4
  -4  -2   1 224.496 9.74999   3
   3   2  -1 27.0902 5.43516   5
   3   2  -1 16.6726 4.65910   2
   3   2  -1 25.7997 4.32673   4
  -3  -2   1 25.6434 7.30552   5
  -3  -2   1 18.4083 4.18066   4
  -3  -2   1 26.8005 5.74754   5
  -3  -2   1 27.9429 5.38898   2
   2   2  -1 1.58505 2.19357   3
   2   2  -1 -4.6150 3.07871   4
   2   2  -1 0.64059 3.50628   5
   2   2  -1 0.77828 3.97362   5
   2   2  -1 3.85189 3.92837   2
  -2  -2   1 -2.9857 3.97541   2
  -2  -2   1 1.51134 3.84341   5
  -2  -2   1 1.47578 3.25848   4
   1   2  -1 141.286 7.07187   2
   1   2  -1 132.012 6.03189   3
   1   2  -1 145.741 6.35675   5
   1   2  -1 148.383 6.05483   5
   1   2  -1 141.971 6.56858   4
  -1  -2   1 146.364 6.12096   5
  -1  -2   1 143.983 5.77757   3
  -1  -2   1 136.855 7.24469   2
   0   2  -1 362.289 9.97146   2
   0   2  -1 350.814 7.08382   5
   0   2  -1 354.765 10.3314   3
   0   2  -1 349.056 7.16704   5
   0  -2   1 345.805 7.19752   5
   0  -2   1 354.189 10.2299   3
   0  -2   1 353.465 10.1612   2
  -1   2  -1 70.4641 8.01836   3
  -1   2  -1 66.6997 4.00770   5
  -1   2  -1 62.2990 5.87992   2
  -1   2  -1 64.1954 3.65159   5
  -1   2  -1 57.4436 6.12561   4
   1  -2   1 65.1819 6.00706   4
   1  -2   1 70.5190 4.20784   5
   1  -2   1 68.6714 3.84018   5
  -2   2  -1 1178.82 27.4949   3
  -2   2  -1 1201.03 25.5313   2
  -2   2  -1 1219.53 22.8659   5
  -2   2  -1 1197.38 22.9762   4
  -2   2  -1 1171.19 22.9993   5
   2  -2   1 1204.46 22.9713   4
   2  -2   1 1185.49 22.8560   5
   2  -2   1 1197.50 25.8230   2
   2  -2   1 1205.13 22.8651   5
  -3   2  -1 345.982 11.2035   5
  -3   2  -1 339.285 11.5899   5
  -3   2  -1 352.715 10.2593   4
  -3   2  -1 354.752 15.7119   3
  -3   2  -1 351.122 13.3715   2
   3  -2   1 354.904 13.9674   2
   3  -2   1 341.550 10.4852   4
   3  -2   1 320.057 10.9594   5
   3  -2   1 326.582 11.0321   5
  -4   2  -1 6.91361 7.44250   3
  -4   2  -1 -1.3995 5.56567   2
  -4   2  -1 1.89147 3.67774   4
  -4   2  -1 5.12857 5.01375   5
  -4   2  -1 3.48283 4.97785   5
   4  -2   1 2.99634 4.74830   5
   4  -2   1 -0.1589 4.52012   4
   4  -2   1 2.19094 5.88443   2
  -5   2  -1 1680.51 31.3792   4
  -5   2  -1 1654.66 35.9194   5
  -5   2  -1 1671.45 41.5481   3
  -5   2  -1 1670.64 37.4711   2
  -5   2  -1 1591.53 36.6549   5
   5  -2   1 1657.49 36.5673   5
   5  -2   1 1715.13 38.8766   2
   5  -2   1 1657.83 32.5866   4
  -6   2  -1 36.5590 8.15056   5
  -6   2  -1 41.8244 9.40936   5
  -6   2  -1 50.8718 11.3349   3
  -6   2  -1 52.1118 5.80286   4
  -6   2  -1 57.8898 9.51005   2
  -6   2  -1 55.1930 12.2437   3
   6  -2   1 29.2385 8.77123   5
   6  -2   1 41.6878 6.76212   4
   6  -2   1 44.1382 8.48072   5
   6  -2   1 61.3949 10.5542   2
  -7   2  -1 1452.43 37.9666   2
  -7   2  -1 1504.40 29.6452   4
  -7   2  -1 1519.23 44.0212   3
  -7   2  -1 1488.76 39.2580   5
  -7   2  -1 1473.73 42.9238   3
   7  -2   1 1409.38 37.1251   5
   7  -2   1 1463.46 38.1133   5
   7  -2   1 1514.19 32.1471   4
   7  -2   1 1517.99 40.5543   2
  -8   2  -1 111.560 17.8767   3
  -8   2  -1 88.4845 15.0069   5
  -8   2  -1 99.6473 13.5616   2
  -8   2  -1 93.7152 8.10634   4
  -8   2  -1 82.5232 13.6445   5
  -8   2  -1 91.1579 17.9095   3
   8  -2   1 93.3331 15.9180   2
   8  -2   1 112.458 10.6065   4
   8  -2   1 104.322 15.7857   5
   8  -2   1 106.591 14.4290   5
  -9   2  -1 91.0557 15.4208   5
  -9   2  -1 76.9647 17.3715   5
  -9   2  -1 75.0142 22.8724   2
  -9   2  -1 87.4291 8.73380   4
  -9   2  -1 91.2508 20.0340   3
  -9   2  -1 70.8008 17.3099   3
   9  -2   1 65.1811 15.9551   2
   9  -2   1 86.2922 11.2608   4
   9  -2   1 89.0825 15.1816   5
   9  -2   1 87.0145 16.4046   5
 -10   2  -1 16.6846 20.9514   3
 -10   2  -1 43.0627 18.1051   3
 -10   2  -1 30.7901 17.7349   5
 -10   2  -1 22.9358 16.9055   5
 -10   2  -1 16.1242 15.1358   2
 -10   2  -1 23.6718 8.36511   4
  10  -2   1 26.3154 17.6123   2
  10  -2   1 13.2065 15.9970   5
  10  -2   1 35.1768 11.3603   4
  10  -2   1 16.8344 15.0174   5
 -11   2  -1 46.2115 10.2817   4
 -11   2  -1 48.4853 21.4062   5
 -11   2  -1 41.5687 17.5925   2
 -11   2  -1 48.6241 23.9164   3
 -11   2  -1 39.3260 25.2790   3
 -11   2  -1 59.0428 23.8172   5
  11  -2   1 33.9925 19.5834   5
  11  -2   1 44.1639 13.9172   4
  11  -2   1 52.4830 20.6083   5
  11  -2   1 40.2846 24.7501   2
 -12   2  -1 63.9868 28.2869   3
 -12   2  -1 61.6002 32.4447   3
 -12   2  -1 15.7058 11.6370   4
 -12   2  -1 22.1425 20.7117   2
 -12   2  -1 -6.2379 24.3608   5
 -12   2  -1 37.7742 29.0741   5
  12  -2   1 35.4430 15.8466   4
  12  -2   1 66.9866 24.8455   5
  12  -2   1 11.8099 24.8867   5
 -13   2  -1 18.8729 26.6222   2
 -13   2  -1 -20.459 39.9020   3
 -13   2  -1 32.1254 32.2110   3
 -13   2  -1 16.6575 13.6164   4
  13  -2   1 -21.782 25.6631   5
  13   1  -1 47.1075 30.2818   5
 -13  -1   1 14.4313 27.1993   2
 -13  -1   1 24.6945 33.9119   3
 -13  -1   1 39.6820 38.5561   5
 -13  -1   1 17.0525 26.4677   3
 -13  -1   1 23.7378 33.1851   5
  12   1  -1 -10.106 16.0765   4
  12   1  -1 13.7921 17.3170   5
  12   1  -1 26.1030 24.3113   5
 -12  -1   1 1.50755 14.5353   4
 -12  -1   1 -0.5301 25.7329   5
 -12  -1   1 -14.754 20.3989   2
 -12  -1   1 -5.8254 24.9670   3
 -12  -1   1 8.02069 26.6364   5
 -12  -1   1 -3.9513 21.4954   3
  11   1  -1 35.1187 21.0721   5
  11   1  -1 -8.9427 21.0399   2
  11   1  -1 5.24101 19.0675   5
  11   1  -1 -1.2698 12.9973   4
 -11  -1   1 -4.3555 20.1473   5
 -11  -1   1 35.4352 21.0334   3
 -11  -1   1 19.6789 17.9472   2
 -11  -1   1 9.70654 17.2661   3
 -11  -1   1 8.21377 11.2252   4
 -11  -1   1 -29.075 20.3197   5
  10   1  -1 108.380 19.4249   2
  10   1  -1 119.037 18.5320   5
  10   1  -1 119.862 20.3006   5
  10   1  -1 108.742 13.4886   4
 -10  -1   1 113.384 19.5513   5
 -10  -1   1 92.8200 21.5665   5
 -10  -1   1 108.683 18.5922   3
 -10  -1   1 122.448 18.3285   2
 -10  -1   1 107.619 21.5706   3
 -10  -1   1 111.733 12.5292   4
   9   1  -1 63.1833 11.6337   5
   9   1  -1 109.750 16.9305   2
   9   1  -1 112.836 11.6748   4
   9   1  -1 112.978 17.3530   5
  -9  -1   1 155.361 23.1956   5
  -9  -1   1 110.171 17.5069   3
  -9  -1   1 92.7215 15.9510   3
  -9  -1   1 101.257 17.5026   2
  -9  -1   1 108.272 10.4782   4
  -9  -1   1 92.9368 17.1233   5
   8   1  -1 210.300 20.5310   5
   8   1  -1 220.359 20.5199   2
   8   1  -1 201.795 14.2241   4
   8   1  -1 197.301 18.7274   5
  -8  -1   1 210.551 19.7020   3
  -8  -1   1 212.308 13.4935   4
  -8  -1   1 221.122 19.0536   2
  -8  -1   1 175.554 19.8737   5
  -8  -1   1 267.207 29.8766   5
  -8  -1   1 207.034 20.5131   3
   7   1  -1 169.571 11.9362   4
   7   1  -1 211.331 21.7898   5
   7   1  -1 150.793 15.3750   5
  -7  -1   1 167.950 15.6404   2
  -7  -1   1 153.982 10.8141   4
  -7  -1   1 178.620 16.1686   3
  -7  -1   1 184.619 16.8798   5
  -7  -1   1 164.926 17.7795   5
   6   1  -1 262.384 15.1851   2
   6   1  -1 245.699 15.7277   5
   6   1  -1 257.355 11.5547   4
   6   1  -1 289.640 20.8178   5
  -6  -1   1 327.722 20.5518   5
  -6  -1   1 239.267 17.0311   5
  -6  -1   1 267.154 11.1958   4
  -6  -1   1 243.511 14.7894   2
  -6  -1   1 242.399 15.4451   3
   5   1  -1 6.22228 6.17081   5
   5   1  -1 4.31877 6.21530   2
   5   1  -1 11.6971 4.73324   4
   5   1  -1 14.1395 6.44302   5
  -5  -1   1 -1.4130 5.89387   2
  -5  -1   1 8.93951 6.62359   3
  -5  -1   1 12.2080 4.55241   4
  -5  -1   1 15.5425 7.69262   5
  -5  -1   1 9.33543 6.69363   5
   4   1  -1 1966.53 38.6514   2
   4   1  -1 1925.06 39.4434   5
   4   1  -1 1933.03 35.4179   4
   4   1  -1 1922.75 40.0132   5
  -4  -1   1 1937.40 39.4678   5
  -4  -1   1 1910.72 40.2071   5
  -4  -1   1 1893.71 37.9326   2
  -4  -1   1 1942.01 35.4324   4
  -4  -1   1 1955.39 38.0752   3
   3   1  -1 746.965 19.3461   5
   3   1  -1 743.683 17.9875   2
   3   1  -1 777.113 16.1506   4
  -3  -1   1 771.160 18.0199   2
  -3  -1   1 777.730 17.5603   3
  -3  -1   1 765.496 18.9011   5
  -3  -1   1 776.039 16.2499   4
   2   1  -1 190.839 8.92043   5
   2   1  -1 201.680 7.12071   3
   2   1  -1 191.416 8.00027   2
   2   1  -1 201.653 6.83036   4
  -2  -1   1 169.656 8.04341   3
  -2  -1   1 197.893 8.58808   5
  -2  -1   1 198.819 8.25691   2
  -2  -1   1 198.617 6.96300   4
   1   1  -1 623.659 12.9344   5
   1   1  -1 623.433 11.6455   3
   1   1  -1 639.051 12.3270   4
   1   1  -1 645.229 12.7661   5
  -1  -1   1 610.958 12.6483   2
  -1  -1   1 624.419 12.7348   5
  -1  -1   1 592.054 11.7909   3
  -1   1  -1 295.390 8.53788   4
  -1   1  -1 303.046 7.20081   5
  -1   1  -1 316.971 7.05581   5
  -1   1  -1 317.947 9.54901   3
  -1   1  -1 308.864 8.76845   2
   1  -1   1 304.743 9.43081   3
   1  -1   1 308.114 7.74040   4
   1  -1   1 309.747 8.76587   2
   1  -1   1 307.898 7.09532   5
  -2   1  -1 54.5119 6.54251   3
  -2   1  -1 62.7359 5.92638   2
  -2   1  -1 58.1080 5.56352   4
  -2   1  -1 61.0135 5.98813   5
  -2   1  -1 48.3668 5.55745   5
   2  -1   1 59.4682 5.74005   4
   2  -1   1 46.8402 5.61729   2
   2  -1   1 51.9855 5.92856   5
  -3   1  -1 75.4464 5.87776   4
  -3   1  -1 60.4444 7.09617   5
  -3   1  -1 52.4829 7.04418   3
  -3   1  -1 53.1488 6.21440   2
  -3   1  -1 63.3459 6.49282   5
   3  -1   1 55.7736 4.82063   4
   3  -1   1 60.6936 6.89178   2
   3  -1   1 58.0227 6.96305   5
  -4   1  -1 76.4886 7.98601   2
  -4   1  -1 75.6576 9.19417   5
  -4   1  -1 80.9148 9.16487   5
  -4   1  -1 84.0309 9.85581   3
  -4   1  -1 79.4164 6.54215   4
   4  -1   1 83.4387 8.73967   5
   4  -1   1 83.0872 8.45566   2
   4  -1   1 87.6076 7.61072   4
   4  -1   1 73.8838 8.35673   5
  -5   1  -1 5.70551 3.97798   4
  -5   1  -1 4.93534 6.73688   5
  -5   1  -1 6.18007 6.88430   5
  -5   1  -1 16.3703 8.30458   3
  -5   1  -1 10.5184 6.44199   2
   5  -1   1 0.53607 5.10736   5
   5  -1   1 4.60082 6.76429   2
   5  -1   1 1.06688 6.00685   5
   5  -1   1 9.80015 5.10199   4
  -6   1  -1 686.192 25.6627   3
  -6   1  -1 708.895 22.8712   2
  -6   1  -1 705.091 16.8567   4
  -6   1  -1 724.513 23.0471   5
  -6   1  -1 675.230 23.5543   5
  -6   1  -1 701.875 26.2190   3
   6  -1   1 667.307 22.2921   5
   6  -1   1 695.030 18.6133   4
   6  -1   1 669.635 23.7582   2
   6  -1   1 659.290 22.7032   5
  -7   1  -1 210.930 16.6723   2
  -7   1  -1 175.856 15.9880   5
  -7   1  -1 160.300 18.7819   3
  -7   1  -1 184.332 20.1152   3
  -7   1  -1 181.661 10.2018   4
  -7   1  -1 169.091 16.9457   5
   7  -1   1 177.147 16.6225   5
   7  -1   1 165.162 12.0987   4
   7  -1   1 182.967 15.8869   5
  -8   1  -1 84.6149 16.6979   3
  -8   1  -1 97.4362 10.5208   4
  -8   1  -1 118.169 16.1611   3
  -8   1  -1 121.615 17.2096   5
  -8   1  -1 105.295 13.6815   2
  -8   1  -1 116.288 15.3410   5
   8  -1   1 76.2249 10.0210   4
   8  -1   1 112.498 15.1944   2
   8  -1   1 137.199 17.0119   5
   8  -1   1 123.570 16.5255   5
  -9   1  -1 240.179 13.6850   4
  -9   1  -1 224.760 28.7042   3
  -9   1  -1 246.567 23.2305   5
  -9   1  -1 244.817 26.0302   5
  -9   1  -1 268.575 23.7315   2
  -9   1  -1 231.718 25.8678   3
   9  -1   1 231.964 17.2380   4
   9  -1   1 275.342 24.3935   5
   9  -1   1 233.382 21.8815   5
   9  -1   1 220.355 25.4478   2
 -10   1  -1 17.5670 8.56719   4
 -10   1  -1 -10.349 14.9372   5
 -10   1  -1 37.0019 17.1894   3
 -10   1  -1 34.8871 20.7452   3
 -10   1  -1 9.41667 14.8441   2
 -10   1  -1 6.53430 18.1191   5
  10  -1   1 17.0667 11.3452   4
  10  -1   1 -1.1842 13.5849   5
  10  -1   1 43.3067 17.3167   2
  10  -1   1 18.0761 12.7575   5
 -11   1  -1 17.9231 19.1845   5
 -11   1  -1 31.6735 21.7430   5
 -11   1  -1 10.2361 9.72381   4
 -11   1  -1 -28.472 16.3593   2
 -11   1  -1 -5.3957 22.5546   3
 -11   1  -1 -20.972 23.3185   3
  11  -1   1 5.40626 16.1618   5
  11  -1   1 14.1157 13.6407   4
  11  -1   1 14.9584 22.2677   2
  11  -1   1 10.2589 19.0613   5
 -12   1  -1 -6.5467 12.0414   4
 -12   1  -1 50.8605 27.7461   5
 -12   1  -1 18.2593 20.7313   2
 -12   1  -1 50.6800 27.6127   3
 -12   1  -1 28.6203 25.1779   3
 -12   1  -1 33.4334 23.3044   5
  12  -1   1 -20.971 21.0951   5
  12  -1   1 14.7047 21.8566   5
  12  -1   1 8.14262 15.8712   4
 -13   1  -1 84.2295 33.4146   5
 -13   1  -1 26.6984 30.0357   3
 -13   1  -1 71.8924 15.6082   4
 -13   1  -1 55.0132 27.7730   5
 -13   1  -1 4.56966 26.6458   2
 -13   1  -1 60.3899 37.9063   3
  13  -1   1 32.3929 27.6828   5
  13   0  -1 37.9361 30.3420   5
 -13   0   1 50.4889 29.1291   2
 -13   0   1 40.6475 29.6225   3
 -13   0   1 -28.377 30.9844   5
 -13   0   1 15.6302 34.9521   3
 -13   0   1 38.0751 34.3936   5
  12   0  -1 58.5365 27.1387   5
  12   0  -1 -12.933 15.0067   4
  12   0  -1 19.3645 23.3484   5
 -12   0   1 38.4933 29.0011   5
 -12   0   1 5.82410 27.0120   3
 -12   0   1 19.3490 21.7129   2
 -12   0   1 35.8745 27.1452   5
 -12   0   1 -4.1494 21.7933   3
  11   0  -1 55.1056 20.8703   5
  11   0  -1 -12.525 20.7465   2
  11   0  -1 13.7974 17.8161   5
  11   0  -1 -2.2199 12.9054   4
 -11   0   1 7.96476 19.2403   3
 -11   0   1 15.2738 17.8885   2
 -11   0   1 -4.7045 22.0316   5
 -11   0   1 14.7830 21.8186   3
 -11   0   1 25.1553 10.9925   4
 -11   0   1 -10.530 18.8645   5
  10   0  -1 129.683 19.6927   5
  10   0  -1 117.445 15.7219   5
  10   0  -1 152.824 13.9680   4
  10   0  -1 152.953 20.3634   2
 -10   0   1 152.834 15.2509   4
 -10   0   1 131.339 18.1904   2
 -10   0   1 143.555 19.5821   5
 -10   0   1 162.233 23.0804   5
 -10   0   1 127.885 22.5504   3
 -10   0   1 130.478 20.6066   3
   9   0  -1 46.6738 15.7128   5
   9   0  -1 31.4419 10.7826   5
   9   0  -1 60.1764 15.2114   2
   9   0  -1 48.1003 9.78310   4
  -9   0   1 37.3661 8.26563   4
  -9   0   1 49.9980 15.2307   3
  -9   0   1 60.5007 19.2811   3
  -9   0   1 74.7150 19.3257   2
  -9   0   1 59.0449 15.3467   5
  -9   0   1 28.5986 17.3302   5
   8   0  -1 90.0154 9.41883   4
   8   0  -1 96.4665 14.9383   5
   8   0  -1 60.6827 10.3640   5
   8   0  -1 89.5282 14.4743   2
  -8   0   1 98.9830 14.5965   3
  -8   0   1 99.8444 15.2244   5
  -8   0   1 92.2506 15.4056   3
  -8   0   1 66.2523 12.5166   2
  -8   0   1 82.5102 8.44718   4
  -8   0   1 67.7556 13.1000   5
   7   0  -1 254.649 17.6276   5
   7   0  -1 225.280 17.9284   5
   7   0  -1 234.659 12.0745   4
  -7   0   1 225.999 17.5941   5
  -7   0   1 351.221 28.5117   5
  -7   0   1 253.399 19.0053   3
  -7   0   1 211.699 16.8040   2
  -7   0   1 228.407 11.1441   4
   6   0  -1 682.565 22.9195   2
   6   0  -1 674.315 22.8055   5
   6   0  -1 664.215 17.3303   4
   6   0  -1 662.768 23.3671   5
  -6   0   1 678.164 22.8935   5
  -6   0   1 690.002 23.9491   3
  -6   0   1 640.748 23.6892   5
  -6   0   1 664.193 21.7637   2
  -6   0   1 696.873 16.6466   4
   5   0  -1 124.738 8.13946   4
   5   0  -1 165.009 16.2275   5
   5   0  -1 131.379 11.6632   2
   5   0  -1 166.461 15.1462   5
  -5   0   1 106.045 11.4539   5
  -5   0   1 134.863 11.6323   2
  -5   0   1 113.283 12.6364   5
  -5   0   1 136.404 12.6839   3
  -5   0   1 120.960 7.46333   4
   4   0  -1 257.940 8.53378   4
   4   0  -1 246.967 12.0321   5
   4   0  -1 240.814 12.5519   5
   4   0  -1 240.265 11.8659   2
  -4   0   1 256.966 8.30341   4
  -4   0   1 250.404 11.9943   5
  -4   0   1 268.402 12.8614   3
  -4   0   1 250.575 11.5657   2
   3   0  -1 79.4617 7.78913   5
   3   0  -1 75.7733 8.27950   5
   3   0  -1 69.5554 7.82592   2
   3   0  -1 80.3124 5.01370   4
  -3   0   1 68.9665 8.46844   3
  -3   0   1 89.6083 10.1404   5
  -3   0   1 69.9971 7.52140   2
  -3   0   1 85.5969 10.1451   5
  -3   0   1 71.2740 4.90694   4
   2   0  -1 7.28334 2.23274   4
   2   0  -1 3.50129 4.00959   5
   2   0  -1 2.04356 3.91687   3
   2   0  -1 11.8361 7.24442   5
   2   0  -1 5.34892 3.73395   2
  -2   0   1 2.47367 4.17018   3
  -2   0   1 6.01462 7.19428   5
  -2   0   1 8.10897 3.58730   2
  -2   0   1 4.94779 3.92793   5
   1   0  -1 21.3128 2.63184   2
   1   0  -1 17.4230 2.30459   5
   1   0  -1 16.3969 1.85530   4
  -1   0   1 12.0386 2.24548   5
  -1   0   1 21.1891 2.49394   3
  -2   0  -1 1936.09 35.0327   2
  -2   0  -1 1973.37 36.3027   3
  -2   0  -1 1876.30 35.3692   5
  -2   0  -1 1959.14 35.2315   5
  -2   0  -1 1973.61 33.5780   4
   2   0   1 1942.57 35.2423   2
   2   0   1 1916.46 35.9798   3
   2   0   1 1932.58 35.1816   5
   2   0   1 1971.37 33.7731   4
  -3   0  -1 693.962 17.0304   2
  -3   0  -1 698.741 14.7318   4
  -3   0  -1 684.974 17.8350   5
  -3   0  -1 675.575 18.4107   3
   3   0   1 693.152 15.1183   4
   3   0   1 694.032 17.2430   5
   3   0   1 672.667 17.6053   5
   3   0   1 696.111 17.5610   2
  -4   0  -1 49.0930 4.72742   4
  -4   0  -1 41.3669 6.56656   2
  -4   0  -1 40.8445 7.22083   3
  -4   0  -1 59.5766 9.88175   5
  -4   0  -1 53.7655 7.33952   5
   4   0   1 36.7473 6.31871   5
   4   0   1 35.4351 5.46296   5
   4   0   1 44.9760 6.81110   2
   4   0   1 46.6296 5.10362   4
  -5   0  -1 16.7520 7.79658   5
  -5   0  -1 25.2354 7.42567   5
  -5   0  -1 19.3657 4.40267   4
  -5   0  -1 20.1498 6.52668   2
  -5   0  -1 7.03230 7.50655   3
   5   0   1 21.7768 5.25429   4
   5   0   1 8.81981 6.01140   5
   5   0   1 10.3548 5.31155   5
   5   0   1 7.13527 6.52223   2
  -6   0  -1 48.9826 5.87744   4
  -6   0  -1 47.7064 9.93918   3
  -6   0  -1 51.8204 10.4187   3
  -6   0  -1 58.7100 8.86030   2
  -6   0  -1 42.9631 9.62298   5
  -6   0  -1 46.3442 8.93595   5
   6   0   1 38.7184 8.12702   5
   6   0   1 50.9976 9.37254   2
   6   0   1 47.7207 9.07468   5
   6   0   1 58.8871 6.93261   4
  -7   0  -1 315.929 21.4406   3
  -7   0  -1 360.977 19.0663   5
  -7   0  -1 370.511 13.0662   4
  -7   0  -1 329.950 20.3734   3
  -7   0  -1 330.962 20.1397   5
  -7   0  -1 332.713 18.3823   2
   7   0   1 333.213 19.9898   2
   7   0   1 333.099 18.8198   5
   7   0   1 356.066 14.9238   4
   7   0   1 343.610 19.5231   5
  -8   0  -1 21.0468 6.90123   4
  -8   0  -1 33.0137 12.9553   3
  -8   0  -1 20.9659 11.7022   3
  -8   0  -1 34.4077 12.2472   5
  -8   0  -1 49.6104 12.6058   5
  -8   0  -1 24.1281 10.6783   2
   8   0   1 17.9322 12.1272   2
   8   0   1 19.1151 8.25839   4
   8   0   1 35.3549 11.5623   5
   8   0   1 26.3421 10.5150   5
  -9   0  -1 306.632 26.1011   3
  -9   0  -1 309.885 15.4430   4
  -9   0  -1 304.604 38.3859   3
  -9   0  -1 314.764 24.6600   5
  -9   0  -1 270.843 27.5789   5
  -9   0  -1 326.658 23.7727   2
   9   0   1 288.460 18.2840   4
   9   0   1 287.519 25.7402   2
   9   0   1 297.247 25.0270   5
   9   0   1 294.869 23.5827   5
 -10   0  -1 207.240 20.2669   2
 -10   0  -1 224.477 22.6210   5
 -10   0  -1 255.350 28.0546   3
 -10   0  -1 268.035 31.2487   5
 -10   0  -1 199.756 15.9180   4
 -10   0  -1 180.019 23.8285   3
  10   0   1 238.640 26.8331   5
  10   0   1 181.498 19.2221   4
  10   0   1 216.735 23.4557   2
 -11   0  -1 66.7355 11.5592   4
 -11   0  -1 74.8341 20.4824   3
 -11   0  -1 47.4062 18.6040   2
 -11   0  -1 33.1995 22.0800   5
 -11   0  -1 72.2448 20.3449   5
 -11   0  -1 55.3545 22.9055   3
  11   0   1 52.3650 19.3461   5
  11   0   1 70.7357 15.2924   4
  11   0   1 93.7642 23.4230   2
  11   0   1 51.6434 21.0557   5
 -12   0  -1 -9.4308 12.6716   4
 -12   0  -1 -4.7440 25.7569   3
 -12   0  -1 35.2202 22.9697   3
 -12   0  -1 19.6618 25.9214   5
 -12   0  -1 2.77609 23.3596   5
 -12   0  -1 -15.228 19.8313   2
  12   0   1 -24.818 25.7965   4
  12   0   1 -8.0569 24.9145   5
  12   0   1 21.4775 23.6767   5
 -13   0  -1 99.6374 36.5400   3
 -13   0  -1 97.0106 30.5848   3
 -13   0  -1 61.1044 27.0474   2
 -13   0  -1 109.254 33.8777   5
 -13   0  -1 87.9904 37.5422   5
 -13   0  -1 67.4069 17.2597   4
  13   0   1 44.3624 27.8508   5
  13   0   1 43.7095 20.3999   4
  13  -1  -1 -26.950 28.9424   5
 -13   1   1 67.1764 39.2458   3
 -13   1   1 -7.4812 24.4522   5
 -13   1   1 39.6924 30.5231   5
 -13   1   1 -32.522 29.1401   3
 -13   1   1 23.7751 26.5896   2
  12  -1  -1 20.0121 24.2442   5
  12  -1  -1 4.48728 24.2761   5
  12  -1  -1 24.9803 15.7402   4
 -12   1   1 38.2570 26.8647   5
 -12   1   1 -14.694 23.3602   3
 -12   1   1 37.1714 29.5348   3
 -12   1   1 -13.933 19.6077   2
 -12   1   1 -21.515 22.7955   5
  11  -1  -1 110.419 22.1075   5
  11  -1  -1 86.1669 14.2067   4
  11  -1  -1 83.5767 22.2938   5
  11  -1  -1 99.4116 25.3157   2
 -11   1   1 99.7385 12.0145   4
 -11   1   1 102.042 24.4480   5
 -11   1   1 118.679 24.9194   5
 -11   1   1 138.327 27.6565   3
 -11   1   1 60.7024 27.5288   3
 -11   1   1 99.5576 20.5164   2
  10  -1  -1 401.845 32.5339   2
  10  -1  -1 414.364 31.3517   5
  10  -1  -1 434.341 20.4497   4
  10  -1  -1 432.508 29.0436   5
 -10   1   1 425.472 32.9184   3
 -10   1   1 455.663 34.2031   5
 -10   1   1 401.597 31.1693   5
 -10   1   1 393.326 37.0287   3
 -10   1   1 396.047 28.2524   2
 -10   1   1 432.837 17.5619   4
   9  -1  -1 13.1596 13.8547   2
   9  -1  -1 -1.1110 10.8596   5
   9  -1  -1 -14.172 12.9194   5
   9  -1  -1 -0.1970 7.88428   4
  -9   1   1 10.2520 14.5801   5
  -9   1   1 1.11723 15.7193   3
  -9   1   1 3.66050 6.65032   4
  -9   1   1 -10.451 14.6487   3
  -9   1   1 -3.3086 12.7349   5
   8  -1  -1 198.762 20.3860   5
   8  -1  -1 175.525 12.9060   4
   8  -1  -1 197.836 18.8852   2
   8  -1  -1 216.258 18.6305   5
  -8   1   1 209.955 20.8947   5
  -8   1   1 252.975 22.1692   5
  -8   1   1 218.814 24.2465   3
  -8   1   1 213.052 19.4396   2
  -8   1   1 177.702 22.0926   3
  -8   1   1 218.411 11.0288   4
   7  -1  -1 936.250 30.1368   5
   7  -1  -1 938.217 29.3130   5
   7  -1  -1 932.974 22.2043   4
   7  -1  -1 822.715 33.9058   2
  -7   1   1 942.232 31.9311   3
  -7   1   1 915.291 29.2703   5
  -7   1   1 904.862 30.3189   5
  -7   1   1 917.637 20.4443   4
  -7   1   1 923.542 28.1956   2
   6  -1  -1 370.355 18.0730   5
   6  -1  -1 353.754 12.1926   4
   6  -1  -1 390.439 18.6167   2
   6  -1  -1 351.076 17.1776   5
  -6   1   1 361.988 18.3250   5
  -6   1   1 368.822 16.9316   2
  -6   1   1 374.309 19.6933   3
  -6   1   1 364.565 11.0843   4
   5  -1  -1 3.91666 6.58392   5
   5  -1  -1 7.65193 6.76698   2
   5  -1  -1 -5.9940 5.91774   5
   5  -1  -1 3.92568 4.11682   4
  -5   1   1 2.38986 6.44049   5
  -5   1   1 2.47752 7.14066   3
  -5   1   1 2.68979 6.70509   5
  -5   1   1 4.46638 3.40903   4
  -5   1   1 4.57284 6.09799   2
   4  -1  -1 524.751 16.4190   5
   4  -1  -1 552.735 17.3537   5
   4  -1  -1 526.061 11.9132   4
   4  -1  -1 529.335 16.9391   2
  -4   1   1 516.178 17.7654   5
  -4   1   1 503.267 16.7480   5
  -4   1   1 534.519 11.4346   4
  -4   1   1 531.708 18.4734   3
  -4   1   1 514.480 16.1375   2
   3  -1  -1 82.4729 8.43906   2
   3  -1  -1 79.2771 4.56828   4
   3  -1  -1 74.5875 8.41662   5
   3  -1  -1 86.6858 7.47219   5
  -3   1   1 83.5932 7.89276   5
  -3   1   1 78.0601 9.62710   3
  -3   1   1 77.5806 4.71858   4
  -3   1   1 83.6990 8.04808   2
  -3   1   1 82.1879 7.88646   5
   2  -1  -1 1823.00 33.3629   2
   2  -1  -1 1790.77 35.3915   3
   2  -1  -1 1789.66 33.3486   5
  -2   1   1 1815.40 33.3728   5
  -2   1   1 1833.00 29.4597   4
  -2   1   1 1831.26 33.1129   2
  -2   1   1 1752.92 32.9864   5
  -2   1   1 1777.47 35.0383   3
   1  -1  -1 1134.96 20.5988   5
   1  -1  -1 1109.13 22.0781   3
   1  -1  -1 1130.47 20.4063   2
  -1   1   1 1154.76 22.1636   3
  -1   1   1 1133.04 20.5695   5
  -1   1   1 1098.53 20.3139   5
  -1  -1  -1 16.1490 2.25927   4
  -1  -1  -1 13.8960 2.50693   5
  -1  -1  -1 22.0195 2.79786   3
  -1  -1  -1 24.1217 2.34480   2
   1   1   1 19.2906 2.40847   3
   1   1   1 16.5926 2.47953   5
   1   1   1 22.1176 2.57464   4
   1   1   1 22.3217 3.15514   2
  -2  -1  -1 64.7059 5.61977   2
  -2  -1  -1 50.3068 5.82325   3
  -2  -1  -1 49.6119 5.37828   5
  -2  -1  -1 55.1915 5.20229   4
  -2  -1  -1 62.1691 6.13984   5
   2   1   1 53.3672 5.17391   4
   2   1   1 38.0245 5.35942   5
   2   1   1 61.2955 5.84310   2
   2   1   1 74.3856 7.93913   5
  -3  -1  -1 376.369 14.7360   5
  -3  -1  -1 306.307 9.48942   4
  -3  -1  -1 316.080 10.6807   2
  -3  -1  -1 314.263 11.6637   5
  -3  -1  -1 300.742 11.1873   3
   3   1   1 323.601 9.78669   4
   3   1   1 309.491 11.4769   5
   3   1   1 289.787 10.7687   2
  -4  -1  -1 3.04384 5.44850   5
  -4  -1  -1 3.65521 5.03891   5
  -4  -1  -1 -2.6045 5.17516   3
  -4  -1  -1 -5.0096 3.36232   4
  -4  -1  -1 -1.5420 4.68329   2
   4   1   1 -0.3483 3.87689   4
   4   1   1 3.80991 4.88593   2
   4   1   1 -1.4665 4.62076   5
   4   1   1 -5.9936 5.01889   5
  -5  -1  -1 587.170 19.7801   3
  -5  -1  -1 605.243 15.4862   4
  -5  -1  -1 564.020 17.9423   2
  -5  -1  -1 558.286 20.0694   5
   5   1   1 563.489 19.2428   5
   5   1   1 590.189 19.1423   2
   5   1   1 581.334 19.6513   5
   5   1   1 620.327 16.3773   4
  -6  -1  -1 581.657 21.1613   3
  -6  -1  -1 592.368 20.1019   2
  -6  -1  -1 599.526 16.5218   4
  -6  -1  -1 579.421 22.5665   5
  -6  -1  -1 554.499 21.4895   3
   6   1   1 729.660 25.8743   5
   6   1   1 580.872 21.4059   5
   6   1   1 571.049 17.4347   4
   6   1   1 579.883 20.9692   2
  -7  -1  -1 28.9263 8.92447   2
  -7  -1  -1 25.2940 6.42076   4
  -7  -1  -1 17.5646 9.40793   3
  -7  -1  -1 3.88433 8.40309   5
  -7  -1  -1 15.4189 8.20809   5
  -7  -1  -1 27.2696 10.2676   3
   7   1   1 15.9963 9.19623   2
   7   1   1 65.3595 19.5519   5
   7   1   1 8.57868 6.70051   4
   7   1   1 12.4150 7.46288   5
  -8  -1  -1 33.0864 11.3394   5
  -8  -1  -1 20.0204 10.9091   3
  -8  -1  -1 8.06877 11.6457   3
  -8  -1  -1 33.8872 7.60458   4
  -8  -1  -1 20.1938 10.3784   2
  -8  -1  -1 14.8254 12.0317   5
   8   1   1 13.6120 11.3115   5
   8   1   1 29.0719 8.30671   4
   8   1   1 27.2099 12.0380   2
   8   1   1 25.2153 9.97742   5
  -9  -1  -1 685.558 30.3553   5
  -9  -1  -1 648.812 29.9298   3
  -9  -1  -1 697.946 32.5977   5
  -9  -1  -1 678.536 21.9046   4
  -9  -1  -1 674.805 28.2386   2
  -9  -1  -1 680.811 32.1293   3
   9   1   1 655.857 31.0873   2
   9   1   1 663.728 23.8764   4
 -10  -1  -1 90.6698 18.4542   5
 -10  -1  -1 109.101 12.1026   4
 -10  -1  -1 125.607 17.6658   2
 -10  -1  -1 103.571 20.2049   3
 -10  -1  -1 100.465 18.9722   3
 -10  -1  -1 78.0906 17.4955   5
  10   1   1 89.3517 19.4706   5
  10   1   1 104.534 19.5382   2
  10   1   1 111.476 20.9413   5
  10   1   1 121.967 14.2810   4
 -11  -1  -1 11.4769 21.6621   3
 -11  -1  -1 19.7509 21.8246   5
 -11  -1  -1 4.95661 18.0295   3
 -11  -1  -1 38.2505 19.6986   5
 -11  -1  -1 -1.1202 16.8471   2
 -11  -1  -1 31.9851 11.7251   4
  11   1   1 30.7840 18.1329   5
  11   1   1 49.7974 21.3278   2
  11   1   1 23.4754 16.0066   5
 -12  -1  -1 12.4007 21.1242   2
 -12  -1  -1 -30.793 25.1046   5
 -12  -1  -1 37.3214 22.2821   3
 -12  -1  -1 14.1424 23.6446   5
 -12  -1  -1 25.9355 13.9005   4
 -12  -1  -1 90.9557 26.8890   3
  12   1   1 38.3466 22.2394   5
  12   1   1 69.6323 23.8180   5
  12   1   1 50.7138 18.8235   4
 -13  -1  -1 4.43325 26.4477   3
 -13  -1  -1 5.16351 32.9164   3
 -13  -1  -1 55.9061 25.8737   2
 -13  -1  -1 15.4383 17.0207   4
 -13  -1  -1 6.38125 32.9164   5
 -13  -1  -1 -25.298 28.8155   5
  13   1   1 1.48456 20.8397   4
  13   1   1 -10.887 26.7079   5
  13  -2  -1 10.7360 33.0316   5
 -13   2   1 -25.784 41.2473   3
 -13   2   1 39.7156 32.3455   3
 -13   2   1 35.1812 26.7691   2
  12  -2  -1 38.3669 18.7518   5
  12  -2  -1 -13.731 23.0841   5
  12  -2  -1 8.50014 13.4298   4
 -12   2   1 10.0374 31.6604   3
 -12   2   1 44.1758 28.2712   5
 -12   2   1 6.08992 21.0830   2
 -12   2   1 16.6032 27.2758   3
 -12   2   1 44.6633 31.1048   5
  11  -2  -1 4.74899 19.0952   5
  11  -2  -1 18.6891 11.5936   4
  11  -2  -1 22.4065 15.9172   5
  11  -2  -1 29.7060 26.0206   2
 -11   2   1 24.3046 9.82498   4
 -11   2   1 -1.4727 22.1340   3
 -11   2   1 28.7162 20.0358   5
 -11   2   1 7.27547 18.3550   2
 -11   2   1 40.2985 24.3439   5
 -11   2   1 43.0507 27.0360   3
  10  -2  -1 186.009 17.1444   4
  10  -2  -1 168.716 22.8184   2
  10  -2  -1 205.944 23.5471   5
  10  -2  -1 160.272 19.2964   5
 -10   2   1 178.190 21.3930   5
 -10   2   1 158.717 24.5796   5
 -10   2   1 156.619 13.2270   4
 -10   2   1 157.038 23.5643   3
 -10   2   1 167.344 26.2995   3
 -10   2   1 177.447 20.3880   2
   9  -2  -1 657.407 29.7988   5
   9  -2  -1 680.065 31.7946   5
   9  -2  -1 692.043 21.3390   4
   9  -2  -1 668.031 33.6672   2
  -9   2   1 662.992 30.8241   2
  -9   2   1 680.970 18.0727   4
  -9   2   1 657.017 31.1769   5
  -9   2   1 676.134 35.0056   3
  -9   2   1 668.420 38.3609   3
  -9   2   1 679.612 34.2767   5
   8  -2  -1 2.63897 6.81554   4
   8  -2  -1 4.48293 11.2836   5
   8  -2  -1 20.2236 12.8660   2
   8  -2  -1 -0.4318 9.94418   5
  -8   2   1 12.4966 12.9977   5
  -8   2   1 8.34823 5.16995   4
  -8   2   1 19.0933 13.7130   3
  -8   2   1 -1.2635 10.8596   2
  -8   2   1 9.32222 11.5761   5
  -8   2   1 -1.0813 14.4217   3
   7  -2  -1 -2.5402 9.12755   5
   7  -2  -1 3.72409 9.76265   2
   7  -2  -1 4.12673 6.97598   5
   7  -2  -1 2.02192 5.81805   4
  -7   2   1 7.48133 10.1377   5
  -7   2   1 8.72085 10.9877   3
  -7   2   1 19.3202 10.2230   5
  -7   2   1 2.74234 4.27934   4
  -7   2   1 6.77392 8.63874   2
   6  -2  -1 115.562 12.3313   2
   6  -2  -1 97.3915 8.64898   4
   6  -2  -1 86.1210 10.4635   5
   6  -2  -1 105.954 12.2791   5
  -6   2   1 87.1926 12.6221   3
  -6   2   1 96.3770 10.3176   2
  -6   2   1 91.0496 11.5069   5
  -6   2   1 84.4603 6.44319   4
   5  -2  -1 1210.61 23.4951   4
   5  -2  -1 1185.10 29.7708   5
   5  -2  -1 1190.91 29.2660   5
   5  -2  -1 1239.27 30.7916   2
  -5   2   1 1217.28 29.6140   2
  -5   2   1 1209.09 30.1223   5
  -5   2   1 1253.38 22.2339   4
  -5   2   1 1221.14 33.2252   3
  -5   2   1 1199.03 29.5370   5
   4  -2  -1 260.045 8.12914   4
   4  -2  -1 297.935 12.8758   5
   4  -2  -1 283.675 13.9682   2
  -4   2   1 290.486 13.0671   2
  -4   2   1 272.070 12.5382   5
  -4   2   1 272.635 12.5662   5
  -4   2   1 249.634 15.6003   3
   3  -2  -1 9.21725 4.60886   5
   3  -2  -1 10.5918 5.35929   2
  -3   2   1 -0.2197 5.83818   3
  -3   2   1 4.60507 2.00847   4
  -3   2   1 -1.2450 4.68661   2
  -3   2   1 1.02315 4.28953   5
  -3   2   1 -1.1265 4.24067   5
   2  -2  -1 1.91403 3.53131   5
   2  -2  -1 7.59107 4.53642   2
   2  -2  -1 3.08100 2.76282   5
  -2   2   1 3.75904 5.07718   3
  -2   2   1 6.05134 3.39570   5
  -2   2   1 5.24898 3.71181   5
  -2   2   1 5.32989 4.11242   2
   1  -2  -1 75.8418 8.29687   3
   1  -2  -1 85.8073 5.16432   5
   1  -2  -1 78.5042 4.61032   5
   1  -2  -1 79.8817 6.31803   2
  -1   2   1 82.3715 5.04819   5
  -1   2   1 82.6378 4.83755   5
  -1   2   1 78.8528 3.45462   4
  -1   2   1 92.9621 7.85938   3
  -1   2   1 79.0589 6.04084   2
   0  -2  -1 224.001 6.14833   4
   0  -2  -1 215.614 5.80832   5
   0  -2  -1 219.801 7.63694   3
   0  -2  -1 231.453 5.94426   5
   0   2   1 223.930 7.82424   3
   0   2   1 219.186 5.96051   5
   0   2   1 215.429 5.83516   5
   0   2   1 226.960 5.99526   4
  -1  -2  -1 90.7709 5.12893   4
  -1  -2  -1 84.7537 5.02178   5
  -1  -2  -1 87.5678 4.16844   3
  -1  -2  -1 78.6241 5.18656   2
   1   2   1 85.8730 4.24709   2
   1   2   1 83.2173 5.28139   5
   1   2   1 88.8376 4.27408   3
   1   2   1 87.9482 5.15674   5
   1   2   1 85.1783 4.98902   4
  -2  -2  -1 434.084 11.0184   2
  -2  -2  -1 443.914 11.2587   4
  -2  -2  -1 414.853 12.4527   5
  -2  -2  -1 425.261 11.9967   5
  -2  -2  -1 410.805 9.62849   3
   2   2   1 435.819 11.2424   4
   2   2   1 424.382 9.47816   3
   2   2   1 430.313 12.4315   5
   2   2   1 448.658 12.1899   5
   2   2   1 431.380 10.9044   2
  -3  -2  -1 2126.43 39.4261   2
  -3  -2  -1 2211.38 41.3521   5
  -3  -2  -1 2135.42 38.5102   3
  -3  -2  -1 2136.42 39.0874   4
   3   2   1 2149.44 41.3145   5
   3   2   1 2176.43 39.7220   2
   3   2   1 2217.08 39.3517   4
  -4  -2  -1 142.701 9.17176   3
  -4  -2  -1 138.507 10.1182   5
  -4  -2  -1 153.010 8.60623   4
  -4  -2  -1 139.412 9.31544   2
   4   2   1 150.716 11.1576   5
   4   2   1 137.894 9.75546   2
   4   2   1 144.852 8.64566   4
   4   2   1 143.557 10.2471   5
  -5  -2  -1 53.9834 7.38275   3
  -5  -2  -1 60.4229 9.14750   5
  -5  -2  -1 50.5076 7.60823   3
  -5  -2  -1 38.7638 6.88029   2
  -5  -2  -1 63.4775 10.1077   5
  -5  -2  -1 55.6242 6.22629   4
   5   2   1 62.5439 9.39089   5
   5   2   1 52.9614 7.58913   2
   5   2   1 60.1339 9.20360   5
   5   2   1 55.6892 6.74936   4
  -6  -2  -1 165.637 13.5050   5
  -6  -2  -1 160.261 12.5153   3
  -6  -2  -1 126.334 14.1886   5
  -6  -2  -1 164.000 10.5907   4
  -6  -2  -1 152.936 13.7261   3
  -6  -2  -1 150.757 12.6930   2
   6   2   1 119.491 12.9634   5
   6   2   1 155.519 13.7656   5
   6   2   1 138.437 11.0091   4
   6   2   1 134.583 12.6622   2
  -7  -2  -1 388.538 19.4897   3
  -7  -2  -1 385.434 15.1830   4
  -7  -2  -1 356.498 18.3861   2
  -7  -2  -1 388.938 19.4348   5
  -7  -2  -1 355.568 18.3028   3
   7   2   1 368.054 19.9756   2
   7   2   1 387.521 16.2874   4
   7   2   1 386.691 19.8787   5
  -8  -2  -1 7.89187 9.66346   2
  -8  -2  -1 1.42585 9.23605   3
  -8  -2  -1 -3.1141 11.2634   5
  -8  -2  -1 -6.5892 6.89249   4
  -8  -2  -1 -9.4989 9.70802   3
  -8  -2  -1 1.55362 10.4430   5
   8   2   1 2.21426 10.4431   2
   8   2   1 2.03672 8.08922   4
   8   2   1 14.1256 8.20089   5
   8   2   1 1.74710 13.7391   5
  -9  -2  -1 -4.5660 12.4749   5
  -9  -2  -1 -7.2614 11.8240   3
  -9  -2  -1 -6.1394 8.50871   4
  -9  -2  -1 2.01594 11.9569   3
  -9  -2  -1 4.23670 11.7985   2
  -9  -2  -1 -4.0741 12.3761   5
   9   2   1 18.6058 10.3228   4
   9   2   1 6.10242 13.6041   5
   9   2   1 5.70261 9.81206   5
   9   2   1 -5.4417 12.6186   2
 -10  -2  -1 90.5988 17.3603   2
 -10  -2  -1 89.9145 12.0699   4
 -10  -2  -1 58.1083 21.6077   5
 -10  -2  -1 107.502 17.8381   3
 -10  -2  -1 116.377 19.1387   3
 -10  -2  -1 138.662 26.5697   5
  10   2   1 110.705 19.9389   5
  10   2   1 97.1941 18.6609   2
  10   2   1 136.804 20.6375   5
 -11  -2  -1 7.51496 32.7609   5
 -11  -2  -1 22.4085 19.7016   5
 -11  -2  -1 11.8193 17.2359   3
 -11  -2  -1 30.6955 17.2754   2
 -11  -2  -1 34.0066 20.5749   3
 -11  -2  -1 22.5638 12.2332   4
  11   2   1 22.2017 19.9129   5
  11   2   1 -1.7704 20.4381   2
  11   2   1 34.0830 15.6328   4
  11   2   1 14.5708 16.1115   5
 -12  -2  -1 24.0169 14.6722   4
 -12  -2  -1 27.0185 20.5130   3
 -12  -2  -1 80.1205 28.0632   5
 -12  -2  -1 48.7227 25.4693   5
 -12  -2  -1 33.5865 21.8159   2
 -12  -2  -1 35.2618 25.6311   3
  12   2   1 111.864 34.5603   5
  12   2   1 31.2531 19.4669   4
  12   2   1 38.5269 26.1434   5
 -13  -2  -1 -33.506 25.6270   2
 -13  -2  -1 11.0090 27.7960   3
 -13  -2  -1 52.6382 29.9595   3
 -13  -2  -1 32.8122 18.4045   4
 -13  -2  -1 47.4671 28.3391   5
 -13  -2  -1 66.3792 36.3271   5
  13   2   1 0.48029 29.0023   5
  13   2   1 -10.891 21.3014   4
  13   2   1 9.77620 30.2154   5
  13  -3  -1 37.6710 27.9648   5
 -13   3   1 53.7277 28.0343   2
 -13   3   1 54.9260 34.9981   3
  12  -3  -1 116.614 29.3916   5
  12  -3  -1 125.091 28.2493   5
 -12   3   1 75.0487 25.5530   5
 -12   3   1 90.5095 30.8622   5
 -12   3   1 62.1686 30.3703   3
 -12   3   1 109.619 24.9689   2
 -12   3   1 51.3919 35.3589   3
  11  -3  -1 149.921 28.1817   2
  11  -3  -1 143.148 21.0895   5
  11  -3  -1 118.771 22.8299   5
 -11   3   1 242.028 29.9703   5
 -11   3   1 158.252 28.6523   3
 -11   3   1 192.535 31.0444   5
 -11   3   1 126.171 32.2132   3
 -11   3   1 164.936 23.1887   2
  10  -3  -1 238.035 22.3913   5
  10  -3  -1 193.995 26.4820   2
  10  -3  -1 224.160 22.9488   5
 -10   3   1 298.303 31.7973   5
 -10   3   1 215.713 26.8685   3
 -10   3   1 209.186 29.3522   3
 -10   3   1 197.689 21.8829   5
 -10   3   1 261.154 29.2822   2
   9  -3  -1 15.5867 7.86200   4
   9  -3  -1 23.4419 14.5772   5
   9  -3  -1 19.4598 15.0175   5
   9  -3  -1 12.7947 16.5317   2
  -9   3   1 22.0596 17.5569   3
  -9   3   1 15.7569 5.83057   4
  -9   3   1 37.3299 15.0837   2
  -9   3   1 46.0343 16.7731   5
  -9   3   1 4.88720 18.9241   3
  -9   3   1 4.25106 13.7862   5
   8  -3  -1 209.906 19.3260   5
   8  -3  -1 192.274 11.7067   4
   8  -3  -1 216.594 24.2614   2
   8  -3  -1 205.415 20.4958   5
  -8   3   1 183.924 8.95256   4
  -8   3   1 178.075 21.8440   5
  -8   3   1 170.691 19.5865   3
  -8   3   1 206.238 28.6252   3
  -8   3   1 186.069 20.6671   2
   7  -3  -1 185.612 17.6575   5
   7  -3  -1 186.587 15.5773   5
   7  -3  -1 199.160 20.5649   2
   7  -3  -1 184.434 10.2412   4
  -7   3   1 209.229 18.0668   2
  -7   3   1 183.325 7.85477   4
  -7   3   1 183.751 21.5841   3
  -7   3   1 189.168 17.6059   5
   6  -3  -1 218.959 17.6219   2
   6  -3  -1 216.102 9.29375   4
   6  -3  -1 200.843 15.4343   5
  -6   3   1 216.221 16.2290   2
  -6   3   1 194.054 15.4763   5
  -6   3   1 199.506 18.6968   3
  -6   3   1 215.761 15.0147   5
  -6   3   1 201.828 7.26433   4
   5  -3  -1 137.529 14.3158   2
   5  -3  -1 141.955 12.3690   5
  -5   3   1 154.218 12.8553   2
  -5   3   1 161.596 6.04871   4
  -5   3   1 157.903 12.2202   5
  -5   3   1 164.936 16.2212   3
  -5   3   1 148.936 12.3863   5
   4  -3  -1 895.422 24.5801   2
   4  -3  -1 845.943 21.7097   5
   4  -3  -1 882.339 22.4732   5
  -4   3   1 891.132 23.4029   2
  -4   3   1 882.181 27.7541   3
  -4   3   1 887.462 22.5150   5
  -4   3   1 905.253 22.1030   5
   3  -3  -1 527.095 14.8729   5
   3  -3  -1 550.203 17.1599   2
   3  -3  -1 564.336 14.7828   5
  -3   3   1 563.157 19.9195   3
  -3   3   1 543.750 14.9742   5
  -3   3   1 567.628 16.5963   2
  -3   3   1 529.672 14.7223   5
  -3   3   1 517.415 11.7448   4
   2  -3  -1 340.368 10.2299   5
   2  -3  -1 343.005 10.0864   5
   2  -3  -1 344.875 12.6458   2
  -2   3   1 349.406 10.1260   5
  -2   3   1 345.185 15.0781   3
  -2   3   1 350.204 8.08182   4
  -2   3   1 349.384 10.0815   5
  -2   3   1 329.341 11.8377   2
   1  -3  -1 7067.57 114.105   5
   1  -3  -1 7200.36 116.889   2
   1  -3  -1 6908.59 114.466   5
  -1   3   1 6989.48 119.547   3
  -1   3   1 7100.95 114.475   5
  -1   3   1 6997.12 116.571   2
  -1   3   1 7103.41 114.500   4
  -1   3   1 7076.04 114.481   5
   0  -3  -1 369.244 8.68014   5
   0  -3  -1 373.064 12.2108   3
   0  -3  -1 386.829 9.83885   4
   0  -3  -1 374.073 8.40466   5
   0   3   1 369.727 10.0506   2
   0   3   1 388.690 9.75333   4
   0   3   1 370.446 8.77336   5
   0   3   1 374.149 11.9211   3
   0   3   1 360.505 8.85059   5
  -1  -3  -1 2221.36 38.6334   5
  -1  -3  -1 2257.81 38.6657   2
  -1  -3  -1 2216.00 39.1742   5
  -1  -3  -1 2236.87 38.8407   3
  -1  -3  -1 2207.02 39.4572   4
   1   3   1 2196.87 39.0649   5
   1   3   1 2226.21 38.2924   2
   1   3   1 2234.27 38.9395   5
   1   3   1 2238.01 39.4314   4
  -2  -3  -1 77.3037 6.80951   5
  -2  -3  -1 75.0618 6.56650   2
  -2  -3  -1 83.5288 6.99566   4
  -2  -3  -1 79.5574 3.72513   3
   2   3   1 92.5619 7.07063   5
   2   3   1 88.1682 7.26149   5
   2   3   1 82.1318 6.72222   4
   2   3   1 94.4977 6.35590   2
  -3  -3  -1 197.750 10.4921   5
  -3  -3  -1 202.389 10.0549   5
  -3  -3  -1 207.464 9.35655   2
  -3  -3  -1 213.207 9.60622   4
   3   3   1 219.933 10.4446   5
   3   3   1 202.848 10.7387   5
   3   3   1 227.218 9.42404   2
   3   3   1 209.681 9.35499   4
  -4  -3  -1 103.576 10.7050   5
  -4  -3  -1 122.118 9.02405   4
  -4  -3  -1 109.323 7.80537   3
  -4  -3  -1 131.944 9.49160   2
  -4  -3  -1 122.186 10.1808   5
   4   3   1 124.982 8.89976   4
   4   3   1 114.659 9.35734   2
   4   3   1 116.427 10.0417   5
   4   3   1 119.534 11.2335   5
  -5  -3  -1 11.7604 5.57902   4
  -5  -3  -1 3.87130 6.81612   5
  -5  -3  -1 15.1772 6.52462   2
  -5  -3  -1 7.63499 4.79932   3
  -5  -3  -1 7.36708 7.07397   5
  -5  -3  -1 5.73650 5.62823   3
   5   3   1 10.7270 5.33902   4
   5   3   1 4.88191 8.91324   5
   5   3   1 7.77267 7.33674   5
   5   3   1 -1.1517 5.79995   2
  -6  -3  -1 247.177 15.4602   5
  -6  -3  -1 259.770 17.1387   5
  -6  -3  -1 253.244 12.8789   3
  -6  -3  -1 282.345 14.6991   2
  -6  -3  -1 261.804 14.0479   3
  -6  -3  -1 269.422 13.0980   4
   6   3   1 261.799 13.2793   4
   6   3   1 259.333 16.5337   5
   6   3   1 273.267 15.2609   2
  -7  -3  -1 48.9536 9.55205   2
  -7  -3  -1 25.0866 10.8109   5
  -7  -3  -1 39.3712 7.96712   4
  -7  -3  -1 34.8822 8.85882   3
  -7  -3  -1 25.7235 9.65531   5
  -7  -3  -1 41.2302 8.29989   3
   7   3   1 30.8158 9.02713   5
   7   3   1 51.0221 13.6816   5
   7   3   1 40.5308 10.4898   2
   7   3   1 36.9805 8.10141   4
  -8  -3  -1 78.7922 10.1151   4
  -8  -3  -1 101.342 16.3488   5
  -8  -3  -1 129.941 24.6914   5
  -8  -3  -1 81.4617 11.2173   3
  -8  -3  -1 71.1707 11.7108   3
  -8  -3  -1 114.916 13.7348   2
   8   3   1 58.9880 10.3087   5
   8   3   1 84.6133 14.9860   5
   8   3   1 92.6236 10.8658   4
   8   3   1 75.1651 12.7053   2
  -9  -3  -1 54.4726 13.5327   3
  -9  -3  -1 59.7719 13.6819   2
  -9  -3  -1 51.4798 10.3686   4
  -9  -3  -1 51.6488 12.8073   3
  -9  -3  -1 59.2305 15.7159   5
  -9  -3  -1 48.2179 14.3210   5
   9   3   1 57.5928 14.5037   5
   9   3   1 106.559 23.2174   5
   9   3   1 38.3035 14.9256   2
 -10  -3  -1 13.9902 15.1200   2
 -10  -3  -1 18.1893 16.2550   5
 -10  -3  -1 19.5673 17.3627   5
 -10  -3  -1 25.3765 11.8349   4
 -10  -3  -1 25.9142 13.8123   3
 -10  -3  -1 -4.5468 14.8904   3
  10   3   1 14.5677 12.4094   5
  10   3   1 41.0618 23.3301   5
  10   3   1 10.8357 17.1352   2
  10   3   1 23.2575 12.5130   4
 -11  -3  -1 56.6188 19.5630   3
 -11  -3  -1 59.8693 20.2700   2
 -11  -3  -1 53.7555 17.5828   3
 -11  -3  -1 47.0956 20.6966   5
 -11  -3  -1 66.8142 14.6376   4
 -11  -3  -1 22.1033 22.8717   5
  11   3   1 34.6662 20.9311   5
  11   3   1 58.6230 24.1892   5
  11   3   1 79.2861 16.3769   4
  11   3   1 0.46153 21.2146   2
 -12  -3  -1 30.9333 15.6464   4
 -12  -3  -1 -3.7223 23.2415   5
 -12  -3  -1 -0.2743 21.1713   2
 -12  -3  -1 37.9245 27.7205   5
 -12  -3  -1 39.4683 19.9299   3
 -12  -3  -1 71.3052 24.3216   3
  12   3   1 -14.261 23.8816   5
  12   3   1 -3.4426 17.9258   4
  12   3   1 24.2139 23.6283   5
 -13  -3  -1 155.231 21.5618   4
 -13  -3  -1 130.120 39.1206   5
 -13  -3  -1 86.9703 24.8744   3
 -13  -3  -1 111.518 29.6225   2
 -13  -3  -1 160.443 29.4918   3
 -13  -3  -1 133.866 33.0105   5
  13   3   1 64.0868 24.3007   4
  13   3   1 205.518 36.7278   5
  13   3   1 158.117 31.7268   5
  13  -4  -1 33.9693 32.9123   5
 -13   4   1 22.9156 36.7470   3
  12  -4  -1 -5.0970 22.4082   5
 -12   4   1 -5.6225 25.0230   5
 -12   4   1 26.9964 31.0583   3
 -12   4   1 -17.610 22.7948   2
  11  -4  -1 59.6130 18.7225   5
  11  -4  -1 46.5791 20.7404   5
  11  -4  -1 51.8936 28.7925   2
 -11   4   1 23.8398 23.7920   5
 -11   4   1 83.5331 33.5428   3
 -11   4   1 54.4825 22.8983   5
 -11   4   1 67.2039 27.0844   3
 -11   4   1 80.9428 22.1853   2
  10  -4  -1 385.384 38.3096   2
  10  -4  -1 324.388 31.8568   5
  10  -4  -1 331.621 28.9975   5
 -10   4   1 368.546 33.5440   5
 -10   4   1 353.044 42.2789   3
 -10   4   1 293.244 31.0008   2
 -10   4   1 297.272 44.2292   5
 -10   4   1 389.493 39.6923   3
   9  -4  -1 64.4595 18.8566   2
   9  -4  -1 100.138 16.7307   5
  -9   4   1 41.5951 14.8454   2
  -9   4   1 78.9185 18.5215   5
  -9   4   1 47.1027 24.8429   3
  -9   4   1 60.0850 22.5720   3
  -9   4   1 27.7993 15.1585   5
   8  -4  -1 147.143 16.1635   5
   8  -4  -1 171.972 20.3672   2
  -8   4   1 176.138 23.6698   3
  -8   4   1 164.405 18.7864   5
  -8   4   1 162.611 17.1853   5
  -8   4   1 161.123 16.8488   2
  -8   4   1 197.139 26.6294   3
   7  -4  -1 -1.2242 11.7997   2
   7  -4  -1 0.80204 8.25467   5
   7  -4  -1 0.86060 9.14790   5
  -7   4   1 16.8770 10.8746   5
  -7   4   1 28.5440 13.0160   3
  -7   4   1 9.31004 9.99194   2
  -7   4   1 2.18441 8.90464   5
   6  -4  -1 961.758 28.1731   5
   6  -4  -1 971.655 27.6237   5
   6  -4  -1 946.783 30.7307   2
  -6   4   1 1022.56 29.0058   5
  -6   4   1 966.778 27.7159   5
  -6   4   1 992.884 29.1309   2
  -6   4   1 963.892 34.4829   3
   5  -4  -1 1084.25 30.7908   2
   5  -4  -1 1102.38 27.9948   5
  -5   4   1 1107.63 29.3872   2
  -5   4   1 1116.49 20.6207   4
  -5   4   1 1106.46 34.5545   3
  -5   4   1 1079.66 28.0939   5
  -5   4   1 1136.62 27.7754   5
   4  -4  -1 498.573 19.3082   2
   4  -4  -1 506.610 16.4399   5
   4  -4  -1 543.449 16.5709   5
  -4   4   1 509.955 18.3247   2
  -4   4   1 523.023 12.3297   4
  -4   4   1 537.317 16.3826   5
  -4   4   1 494.641 22.7831   3
  -4   4   1 514.552 16.4982   5
   3  -4  -1 1558.00 30.0711   5
   3  -4  -1 1499.60 30.3197   5
   3  -4  -1 1518.47 34.0006   2
  -3   4   1 1515.07 37.5908   3
  -3   4   1 1522.03 30.4500   5
  -3   4   1 1547.09 33.1139   2
  -3   4   1 1550.61 30.2804   5
  -3   4   1 1501.15 28.2281   4
   2  -4  -1 1360.69 25.4634   5
   2  -4  -1 1350.43 29.7117   2
   2  -4  -1 1337.09 25.9208   5
  -2   4   1 1370.59 25.9375   5
  -2   4   1 1392.53 25.9827   5
  -2   4   1 1365.72 29.0583   2
  -2   4   1 1372.46 33.0413   3
  -2   4   1 1385.64 25.9670   4
  -2   4   1 1395.89 25.0905   4
   1  -4  -1 1141.23 21.0979   5
  -1   4   1 1202.81 27.9086   3
  -1   4   1 1170.91 21.2222   5
  -1   4   1 1146.37 21.3718   5
  -1   4   1 1171.61 24.8233   2
  -1   4   1 1195.04 22.4665   4
   0  -4  -1 9096.18 150.022   4
   0   4   1 9218.22 149.827   4
   0   4   1 9153.52 152.533   3
   0   4   1 9257.25 148.000   5
   0   4   1 9095.62 149.907   2
   0   4   1 9162.90 147.915   5
  -1  -4  -1 61.7393 6.82206   4
  -1  -4  -1 77.5177 7.08777   2
  -1  -4  -1 67.9861 6.71512   5
  -1  -4  -1 69.9768 5.36644   5
   1   4   1 69.9524 6.80157   3
   1   4   1 71.7149 6.29194   2
   1   4   1 71.2469 6.95341   4
   1   4   1 61.8461 5.78818   5
   1   4   1 74.5270 6.12211   5
  -2  -4  -1 1076.59 22.2475   2
  -2  -4  -1 1053.40 23.3651   5
  -2  -4  -1 1042.27 22.9977   4
  -2  -4  -1 1127.13 22.8431   5
   2   4   1 1090.27 23.1233   4
   2   4   1 1078.35 22.9208   5
   2   4   1 1070.13 23.1238   5
   2   4   1 1080.83 21.8627   2
   2   4   1 1078.26 19.7872   3
  -3  -4  -1 235.908 10.6312   5
  -3  -4  -1 217.439 10.3723   4
  -3  -4  -1 215.155 10.2382   2
   3   4   1 214.552 11.1697   5
   3   4   1 232.417 10.4093   4
   3   4   1 231.268 11.0327   5
   3   4   1 233.312 9.99484   2
  -4  -4  -1 110.189 11.2853   5
  -4  -4  -1 116.738 9.82415   4
  -4  -4  -1 130.986 10.4939   2
  -4  -4  -1 110.686 10.3402   5
   4   4   1 114.599 10.6712   5
   4   4   1 127.203 11.6486   5
   4   4   1 127.107 9.55287   4
   4   4   1 143.984 10.3433   2
  -5  -4  -1 804.415 23.6879   5
  -5  -4  -1 834.552 22.3002   2
  -5  -4  -1 859.584 21.8654   4
  -5  -4  -1 796.116 25.0129   5
  -5  -4  -1 776.889 17.4930   3
   5   4   1 783.175 21.2519   4
   5   4   1 778.996 24.1334   5
   5   4   1 785.889 23.8956   5
   5   4   1 802.597 22.0235   2
  -6  -4  -1 519.593 19.6124   2
  -6  -4  -1 500.887 22.0977   5
  -6  -4  -1 497.704 14.5705   3
  -6  -4  -1 508.144 20.5622   5
  -6  -4  -1 494.881 15.6899   3
  -6  -4  -1 498.929 17.8966   4
   6   4   1 534.619 17.9594   4
   6   4   1 499.652 19.1446   2
   6   4   1 477.692 20.9794   5
   6   4   1 506.158 20.9544   5
  -7  -4  -1 28.4576 7.10650   3
  -7  -4  -1 45.4712 10.6834   2
  -7  -4  -1 32.3062 8.16936   4
  -7  -4  -1 34.2992 8.18968   3
  -7  -4  -1 36.5109 10.3875   5
  -7  -4  -1 33.0691 9.69317   5
   7   4   1 44.3276 11.9048   5
   7   4   1 25.4337 10.3374   2
   7   4   1 32.3127 8.95898   4
   7   4   1 42.6780 11.2502   5
  -8  -4  -1 273.913 23.4530   5
  -8  -4  -1 273.143 20.0285   2
  -8  -4  -1 317.124 17.6582   4
  -8  -4  -1 302.556 22.3230   5
  -8  -4  -1 278.506 17.3355   3
  -8  -4  -1 280.561 16.3794   3
   8   4   1 317.066 22.1437   5
   8   4   1 281.801 22.1537   5
   8   4   1 238.868 20.6497   4
   8   4   1 240.825 20.4853   2
  -9  -4  -1 -19.948 13.2459   5
  -9  -4  -1 16.0070 11.1524   3
  -9  -4  -1 7.92446 20.3036   5
  -9  -4  -1 -2.9634 9.95958   3
  -9  -4  -1 8.03792 12.7650   2
  -9  -4  -1 -0.0585 10.0559   4
   9   4   1 5.25494 10.7383   5
   9   4   1 5.25802 10.6365   4
   9   4   1 2.18613 13.0390   2
   9   4   1 -31.149 24.6318   5
 -10  -4  -1 -3.0981 13.8228   3
 -10  -4  -1 6.60975 11.5033   4
 -10  -4  -1 6.88567 15.3495   2
 -10  -4  -1 -1.9479 16.7928   5
 -10  -4  -1 7.31945 18.2814   5
 -10  -4  -1 9.75328 11.5730   3
  10   4   1 16.3307 13.2703   4
  10   4   1 20.6074 14.8746   5
  10   4   1 4.56290 23.6567   5
  10   4   1 -10.706 15.6424   2
 -11  -4  -1 10.8338 20.0674   2
 -11  -4  -1 9.51193 14.8922   3
 -11  -4  -1 7.72583 23.3173   5
 -11  -4  -1 14.6534 13.2804   4
 -11  -4  -1 -9.8569 16.2640   3
 -11  -4  -1 7.75756 19.7150   5
  11   4   1 5.02609 17.9938   5
  11   4   1 -25.765 17.5882   5
  11   4   1 4.80039 14.9373   4
  11   4   1 -4.9206 19.8852   2
 -12  -4  -1 -14.252 24.2840   5
 -12  -4  -1 1.81113 16.3089   3
 -12  -4  -1 5.03632 23.3096   2
 -12  -4  -1 16.2339 16.8262   4
 -12  -4  -1 58.8175 29.6173   5
 -12  -4  -1 36.2901 21.1735   3
  12   4   1 11.9015 18.7560   4
  12   4   1 47.2709 28.7701   5
  12   4   1 29.3945 23.3631   5
 -13  -4  -1 5.54760 19.5645   3
 -13  -4  -1 30.8252 20.4341   4
 -13  -4  -1 32.1869 36.4013   5
 -13  -4  -1 -34.308 26.4069   2
 -13  -4  -1 56.9931 31.0419   5
  13   4   1 89.2721 32.3604   5
  13   4   1 54.6760 25.9101   4
  13   4   1 42.7544 31.2583   5
  12  -5  -1 35.4121 25.3214   5
 -12   5   1 86.1862 34.1849   3
 -12   5   1 -35.573 24.0471   2
  11  -5  -1 -17.747 21.2533   5
  11  -5  -1 -15.136 21.2448   5
 -11   5   1 97.6647 28.4393   5
 -11   5   1 40.1110 33.9422   3
 -11   5   1 22.0768 28.1356   3
 -11   5   1 -1.5385 24.5769   5
 -11   5   1 -7.0744 19.8704   2
  10  -5  -1 30.2235 24.4757   2
  10  -5  -1 -4.9826 16.2163   5
  10  -5  -1 17.4813 16.8618   5
 -10   5   1 8.02346 19.7588   5
 -10   5   1 2.73545 23.9552   3
 -10   5   1 16.3552 18.4482   2
 -10   5   1 -5.4406 18.6272   5
 -10   5   1 -13.604 25.3928   3
   9  -5  -1 -22.369 12.8409   5
   9  -5  -1 13.5157 18.3920   2
   9  -5  -1 10.4037 14.4683   5
  -9   5   1 20.8926 20.0770   3
  -9   5   1 6.44240 21.8648   3
  -9   5   1 -13.143 14.8124   5
  -9   5   1 -0.4773 14.8918   2
  -9   5   1 4.63014 14.6577   5
   8  -5  -1 4.38064 15.9603   2
   8  -5  -1 -3.7655 15.2590   5
  -8   5   1 1.11258 12.6776   2
  -8   5   1 5.25507 17.9556   3
  -8   5   1 -11.223 16.5885   3
  -8   5   1 -3.7577 13.6662   5
  -8   5   1 0.93432 10.9377   5
   7  -5  -1 33.5961 14.5931   2
   7  -5  -1 20.0099 10.2197   5
   7  -5  -1 5.35470 9.50391   5
  -7   5   1 2.04350 10.6092   2
  -7   5   1 12.3236 9.38944   5
  -7   5   1 3.98658 10.1855   5
  -7   5   1 5.84400 12.4642   3
   6  -5  -1 9.07642 8.34878   5
   6  -5  -1 36.3256 9.14823   5
  -6   5   1 -0.8326 11.3841   3
  -6   5   1 14.3562 8.56590   5
  -6   5   1 -0.5035 7.75793   5
  -6   5   1 1.77784 9.16124   2
   5  -5  -1 250.892 18.8815   2
   5  -5  -1 252.486 13.8025   5
   5  -5  -1 260.324 14.5501   5
  -5   5   1 230.524 20.4108   3
  -5   5   1 256.021 9.32357   4
  -5   5   1 270.830 14.2935   5
  -5   5   1 268.112 16.4297   2
  -5   5   1 244.157 14.3149   5
   4  -5  -1 124.815 9.80367   5
   4  -5  -1 128.896 10.2601   5
   4  -5  -1 127.483 12.3869   2
  -4   5   1 121.196 16.9742   3
  -4   5   1 129.347 12.9521   2
  -4   5   1 119.938 10.3082   5
  -4   5   1 111.454 9.71923   5
  -4   5   1 131.331 8.35102   4
   3  -5  -1 486.967 18.6614   2
   3  -5  -1 479.662 13.3699   5
   3  -5  -1 477.142 13.9894   5
  -3   5   1 470.325 13.5312   4
  -3   5   1 453.245 21.2335   3
  -3   5   1 480.430 11.9447   4
  -3   5   1 483.635 13.7667   5
  -3   5   1 472.165 13.7500   5
  -3   5   1 474.889 17.2550   2
   2  -5  -1 203.530 8.05887   5
   2  -5  -1 205.192 12.9207   2
   2  -5  -1 218.132 7.36383   5
  -2   5   1 201.359 14.9581   3
  -2   5   1 208.775 8.26676   4
  -2   5   1 203.734 11.9202   2
  -2   5   1 192.737 7.65269   5
  -2   5   1 212.521 8.41548   5
  -1   5   1 1186.13 29.5068   3
  -1   5   1 1181.70 26.5667   2
  -1   5   1 1202.16 23.9394   4
   0  -5  -1 2290.68 42.3538   4
   0   5   1 2304.72 41.9627   4
   0   5   1 2303.51 45.0301   3
   0   5   1 2281.24 39.2996   5
   0   5   1 2281.81 42.2795   2
  -1  -5  -1 309.404 9.10525   5
  -1  -5  -1 318.995 11.8334   2
  -1  -5  -1 310.095 10.0705   5
  -1  -5  -1 336.902 11.8154   4
   1   5   1 311.125 10.7555   2
   1   5   1 315.715 11.7333   3
   1   5   1 306.934 11.3704   4
   1   5   1 309.107 9.68364   5
  -2  -5  -1 513.717 14.9309   2
  -2  -5  -1 502.624 15.1126   5
  -2  -5  -1 504.874 13.8339   5
  -2  -5  -1 500.003 15.4500   4
   2   5   1 522.769 12.5760   3
   2   5   1 506.960 14.6660   5
   2   5   1 513.402 14.1250   2
   2   5   1 515.872 15.1346   4
   2   5   1 522.141 14.4224   5
  -3  -5  -1 2805.45 51.4423   2
  -3  -5  -1 2781.09 52.5830   4
  -3  -5  -1 2818.49 52.1094   5
  -3  -5  -1 2746.39 53.3296   5
   3   5   1 2827.03 52.3179   4
   3   5   1 2821.54 52.8303   5
   3   5   1 2808.27 51.1113   2
   3   5   1 2799.06 52.9539   5
  -4  -5  -1 691.236 20.2603   5
  -4  -5  -1 685.111 19.4052   2
  -4  -5  -1 665.417 19.5778   4
   4   5   1 726.357 19.1824   2
   4   5   1 678.241 19.2986   4
   4   5   1 657.121 20.4000   5
   4   5   1 690.493 21.2653   5
  -5  -5  -1 874.005 23.9277   2
  -5  -5  -1 880.972 27.1172   5
  -5  -5  -1 869.309 25.0498   5
  -5  -5  -1 903.735 23.9585   4
   5   5   1 884.684 23.5224   4
   5   5   1 911.752 23.8239   2
   5   5   1 819.193 26.9726   5
   5   5   1 897.927 25.7915   5
  -6  -5  -1 302.310 19.2670   5
  -6  -5  -1 282.961 15.4309   4
  -6  -5  -1 286.887 17.5020   5
  -6  -5  -1 307.098 16.7724   2
   6   5   1 301.720 17.7326   5
   6   5   1 330.831 18.5807   5
   6   5   1 308.539 16.4737   2
   6   5   1 302.808 15.8564   4
  -7  -5  -1 1268.84 31.9560   4
  -7  -5  -1 1210.51 25.4600   3
  -7  -5  -1 1226.80 32.8530   2
  -7  -5  -1 1199.42 36.9984   5
  -7  -5  -1 1230.87 24.4374   3
   7   5   1 1229.60 35.8243   5
   7   5   1 1167.68 35.2262   4
   7   5   1 1133.72 40.4195   2
  -8  -5  -1 10.8818 11.9213   5
  -8  -5  -1 -7.0840 10.7636   2
  -8  -5  -1 20.6808 9.87211   4
  -8  -5  -1 -10.026 7.71626   3
  -8  -5  -1 5.11369 7.07932   3
  -8  -5  -1 13.5031 13.5192   5
   8   5   1 8.15668 10.9326   2
   8   5   1 15.4423 11.2400   5
   8   5   1 7.67245 9.44067   4
   8   5   1 13.7918 13.1619   5
  -9  -5  -1 -3.1970 13.1993   2
  -9  -5  -1 26.8566 10.1168   3
  -9  -5  -1 28.4209 17.2710   5
  -9  -5  -1 8.58885 8.62592   3
  -9  -5  -1 9.79188 14.0653   5
  -9  -5  -1 11.9888 10.9051   4
   9   5   1 8.15683 13.5463   2
   9   5   1 2.21358 11.4035   4
   9   5   1 26.2157 13.4283   5
   9   5   1 31.6542 14.1836   5
 -10  -5  -1 457.392 32.8074   5
 -10  -5  -1 424.694 20.5290   3
 -10  -5  -1 480.926 38.4125   5
 -10  -5  -1 442.941 23.3089   3
 -10  -5  -1 460.634 25.9513   4
 -10  -5  -1 415.761 30.3478   2
  10   5   1 476.412 34.5347   5
  10   5   1 578.160 42.1716   5
  10   5   1 452.194 27.0778   4
  10   5   1 446.236 31.2796   2
 -11  -5  -1 143.034 27.4071   5
 -11  -5  -1 140.127 24.4304   5
 -11  -5  -1 120.397 22.4702   2
 -11  -5  -1 123.941 17.9033   4
 -11  -5  -1 119.361 14.8399   3
 -11  -5  -1 179.336 23.6615   3
  11   5   1 123.001 19.5968   4
  11   5   1 91.4134 23.2231   2
  11   5   1 214.550 33.7155   5
  11   5   1 134.988 25.5318   5
 -12  -5  -1 41.9204 19.0826   4
 -12  -5  -1 63.2411 19.5638   3
 -12  -5  -1 65.1205 31.9130   5
 -12  -5  -1 80.4798 26.2373   5
 -12  -5  -1 55.8058 23.5484   2
 -12  -5  -1 39.1786 15.6135   3
  12   5   1 54.9383 27.7038   5
  12   5   1 33.3620 21.1286   4
  12   5   1 45.4154 25.9810   5
 -13  -5  -1 22.3305 22.9725   4
 -13  -5  -1 62.9238 29.8058   2
 -13  -5  -1 62.7179 31.4481   5
  13   5   1 43.8603 34.1733   5
  13   5   1 36.8114 27.1395   4
  13   5   1 53.6018 34.3306   5
  12  -6  -1 16.1722 26.0212   5
 -12   6   1 82.2210 38.0118   3
 -12   6   1 120.451 29.7788   2
  11  -6  -1 85.2157 22.5418   5
  11  -6  -1 77.1475 23.3586   5
 -11   6   1 46.5387 29.3088   3
 -11   6   1 48.3042 24.3395   2
 -11   6   1 33.1387 24.9043   5
  10  -6  -1 -14.759 16.6678   5
  10  -6  -1 13.3024 17.1074   5
  10  -6  -1 28.5689 26.7617   2
 -10   6   1 -28.876 29.5779   3
 -10   6   1 40.2131 19.9455   2
 -10   6   1 -21.370 23.6561   3
 -10   6   1 30.2891 21.4238   5
 -10   6   1 33.4000 21.4295   5
   9  -6  -1 5.45733 15.6435   5
   9  -6  -1 24.0814 22.3432   2
   9  -6  -1 8.65007 12.5071   5
  -9   6   1 1.59265 16.9231   5
  -9   6   1 12.7937 23.1866   3
  -9   6   1 8.41393 16.2159   5
  -9   6   1 -23.767 18.6752   3
  -9   6   1 -22.482 16.1894   2
   8  -6  -1 42.1556 13.7332   5
   8  -6  -1 33.7193 12.4160   5
   8  -6  -1 24.0436 18.4426   2
  -8   6   1 27.8666 13.6952   5
  -8   6   1 30.2558 16.7291   3
  -8   6   1 43.9116 21.5832   3
  -8   6   1 13.6157 13.8608   5
  -8   6   1 82.4500 18.2417   2
   7  -6  -1 107.878 13.5493   5
   7  -6  -1 110.603 13.4076   5
   7  -6  -1 101.890 18.4156   2
  -7   6   1 108.168 14.9182   2
  -7   6   1 103.001 13.3153   5
  -7   6   1 104.818 13.6027   5
  -7   6   1 102.053 18.6547   3
   6  -6  -1 35.8083 13.2581   2
   6  -6  -1 54.0806 9.96881   5
   6  -6  -1 52.7177 9.95808   5
  -6   6   1 42.7721 14.5802   3
  -6   6   1 46.1954 9.82607   5
  -6   6   1 50.5964 11.9661   2
  -6   6   1 40.6652 10.2801   5
   5  -6  -1 80.6684 9.08269   5
   5  -6  -1 65.7950 9.34855   5
   5  -6  -1 92.3792 13.7214   2
  -5   6   1 65.7235 6.89458   4
  -5   6   1 91.9977 15.2403   3
  -5   6   1 78.3043 9.50887   5
  -5   6   1 81.7884 9.50843   5
  -5   6   1 79.4805 6.92641   4
  -5   6   1 98.6387 12.2997   2
   4  -6  -1 23.1796 6.03850   5
   4  -6  -1 29.3265 9.98645   2
   4  -6  -1 12.3072 6.47661   5
  -4   6   1 27.5272 6.34751   5
  -4   6   1 11.4281 8.04498   2
  -4   6   1 18.5542 6.30507   5
  -4   6   1 21.6833 4.51374   4
  -4   6   1 21.2568 5.86328   4
  -4   6   1 12.8665 10.8036   3
   3  -6  -1 953.336 20.1297   5
   3  -6  -1 938.882 20.7626   5
   3  -6  -1 983.048 27.5215   2
  -3   6   1 935.676 20.8293   5
  -3   6   1 922.101 25.7634   2
  -3   6   1 925.932 20.8623   5
  -3   6   1 913.541 30.3791   3
  -3   6   1 944.799 22.1015   4
  -3   6   1 949.185 20.2160   4
  -2   6   1 -4.9642 5.78313   2
  -2   6   1 -2.1616 7.29331   3
  -2   6   1 -0.9022 4.09483   5
  -2   6   1 -0.5505 3.39173   5
  -2   6   1 4.44266 4.30434   4
  -1   6   1 12.2604 4.37304   4
  -1   6   1 4.63699 6.15988   2
  -1   6   1 11.1788 7.21072   3
   0   6   1 229.348 13.2064   3
   0   6   1 232.980 11.7833   2
   0   6   1 219.303 10.5370   4
  -1  -6  -1 35.9397 6.92084   2
  -1  -6  -1 25.3078 4.02911   5
  -1  -6  -1 29.9789 6.16521   4
  -1  -6  -1 29.7016 5.23872   5
   1   6   1 23.2721 4.52906   5
   1   6   1 27.9934 5.56657   4
   1   6   1 28.3464 6.23039   3
   1   6   1 28.0211 4.77115   5
   1   6   1 28.7621 5.92593   2
  -2  -6  -1 1123.01 26.8176   4
  -2  -6  -1 1157.43 24.3670   5
  -2  -6  -1 1182.81 26.3751   2
  -2  -6  -1 1159.91 25.6822   5
   2   6   1 1186.63 26.6251   4
   2   6   1 1154.53 25.2835   5
   2   6   1 1170.24 25.2543   5
   2   6   1 1172.24 24.2578   3
   2   6   1 1145.02 25.1300   2
  -3  -6  -1 79.9226 8.26066   2
  -3  -6  -1 70.5526 7.81405   4
  -3  -6  -1 84.2877 8.99149   5
  -3  -6  -1 87.5566 9.41907   5
   3   6   1 86.4369 9.72511   4
   3   6   1 64.0792 7.21640   5
   3   6   1 82.1584 5.74809   3
   3   6   1 85.6568 9.50139   2
   3   6   1 81.4766 10.0623   5
  -4  -6  -1 253.476 13.7183   4
  -4  -6  -1 270.247 13.4208   5
  -4  -6  -1 214.853 14.7501   5
  -4  -6  -1 253.862 13.9213   2
   4   6   1 256.940 13.3777   4
   4   6   1 256.578 14.1175   5
   4   6   1 285.918 14.2369   5
   4   6   1 253.175 12.9912   2
  -5  -6  -1 267.623 15.4944   5
  -5  -6  -1 255.841 15.1348   2
  -5  -6  -1 288.462 15.4060   4
   5   6   1 265.992 15.9067   5
   5   6   1 264.388 14.5175   4
   5   6   1 257.131 14.4643   2
   5   6   1 288.924 16.5709   5
  -6  -6  -1 725.431 24.1467   2
  -6  -6  -1 679.181 27.0568   5
  -6  -6  -1 681.777 24.7368   5
  -6  -6  -1 695.802 23.4559   4
   6   6   1 690.157 32.1013   4
   6   6   1 739.010 26.0956   5
   6   6   1 708.767 23.0121   2
   6   6   1 626.805 30.5964   5
  -7  -6  -1 51.6898 11.7051   2
  -7  -6  -1 62.5743 10.8250   4
  -7  -6  -1 50.2395 13.9818   5
  -7  -6  -1 65.4308 13.1048   5
   7   6   1 49.0536 11.2272   2
   7   6   1 49.6702 11.4881   5
   7   6   1 61.3273 10.9297   4
  -8  -6  -1 113.292 18.6869   5
  -8  -6  -1 101.230 15.8657   5
  -8  -6  -1 84.9019 13.7297   4
  -8  -6  -1 128.437 15.7499   2
   8   6   1 103.405 14.5201   2
   8   6   1 105.781 16.1301   5
   8   6   1 96.6300 14.6280   5
   8   6   1 103.982 13.8378   4
  -9  -6  -1 296.882 29.1935   2
  -9  -6  -1 300.422 22.7503   4
  -9  -6  -1 301.297 31.2134   5
  -9  -6  -1 284.729 27.0681   5
   9   6   1 258.995 24.7938   2
   9   6   1 298.315 23.9537   4
   9   6   1 322.778 28.5870   5
   9   6   1 301.678 27.7778   5
 -10  -6  -1 566.065 33.9721   2
 -10  -6  -1 616.417 40.8146   5
 -10  -6  -1 595.032 36.3710   5
 -10  -6  -1 607.942 30.4587   4
  10   6   1 584.571 30.3690   4
  10   6   1 589.094 37.5612   5
  10   6   1 613.518 37.3214   5
  10   6   1 548.465 32.7014   2
 -11  -6  -1 68.7452 22.2912   5
 -11  -6  -1 61.5836 17.3388   4
 -11  -6  -1 36.6189 21.1604   2
 -11  -6  -1 31.4016 26.5833   5
  11   6   1 53.5842 19.2284   5
  11   6   1 55.8538 22.7000   2
  11   6   1 55.9086 18.6835   4
  11   6   1 54.7958 23.1513   5
 -12  -6  -1 153.527 23.1413   4
 -12  -6  -1 100.866 34.5476   5
 -12  -6  -1 119.886 29.3739   5
 -12  -6  -1 67.7185 26.5489   2
  12   6   1 139.759 25.6442   4
  12   6   1 102.104 31.8306   5
  12   6   1 86.5062 28.6158   5
 -13  -6  -1 2.49505 24.1997   4
 -13  -6  -1 9.61413 28.8076   5
 -13  -6  -1 86.9363 30.8841   2
  13   6   1 -50.569 36.9900   5
  13   6   1 -0.0708 33.0849   5
  13   6   1 53.7553 26.9801   4
 -12   7   1 36.5628 28.7730   2
 -12   7   1 37.7578 38.0872   3
  11  -7  -1 45.9995 24.0628   5
 -11   7   1 31.7531 24.3595   2
 -11   7   1 74.0505 33.6330   3
  10  -7  -1 130.763 30.8934   2
  10  -7  -1 156.712 23.1585   5
  10  -7  -1 177.613 22.2780   5
 -10   7   1 167.910 26.5935   5
 -10   7   1 183.354 33.5980   3
 -10   7   1 134.453 23.6312   2
   9  -7  -1 231.731 26.5918   5
   9  -7  -1 191.608 30.1669   2
   9  -7  -1 221.609 24.6381   5
  -9   7   1 218.706 35.0957   3
  -9   7   1 206.794 30.0138   3
  -9   7   1 187.800 23.7885   5
  -9   7   1 189.331 20.3273   5
  -9   7   1 192.740 23.4664   2
   8  -7  -1 17.6968 20.0897   2
   8  -7  -1 70.7438 14.1620   5
   8  -7  -1 43.2923 12.6259   5
  -8   7   1 44.5741 21.4929   3
  -8   7   1 43.4566 15.9770   5
  -8   7   1 42.2493 24.4428   3
  -8   7   1 49.7944 16.3852   2
  -8   7   1 39.9834 15.1329   5
   7  -7  -1 381.908 31.8512   2
   7  -7  -1 340.506 21.3647   5
   7  -7  -1 346.853 19.6804   5
  -7   7   1 334.719 21.0212   5
  -7   7   1 303.667 34.1524   3
  -7   7   1 330.404 21.8510   5
  -7   7   1 380.593 32.8336   3
  -7   7   1 364.156 25.4431   2
   6  -7  -1 45.1256 9.99025   5
   6  -7  -1 26.3277 16.1874   2
   6  -7  -1 34.6269 10.2410   5
  -6   7   1 51.8325 7.09352   4
  -6   7   1 54.0535 11.1642   5
  -6   7   1 54.4412 5.81452   4
  -6   7   1 57.0472 13.1006   2
  -6   7   1 52.4205 11.2899   5
  -6   7   1 67.8974 16.6217   3
   5  -7  -1 639.403 28.2799   2
   5  -7  -1 625.136 19.2059   5
   5  -7  -1 618.200 20.1107   5
  -5   7   1 615.233 20.4778   5
  -5   7   1 613.832 20.1813   5
  -5   7   1 584.797 17.5652   4
  -5   7   1 625.307 25.4357   2
  -5   7   1 617.582 15.5800   4
  -5   7   1 590.281 30.9020   3
   4  -7  -1 120.071 9.33663   5
   4  -7  -1 114.364 10.5851   5
   4  -7  -1 127.977 14.3087   2
  -4   7   1 135.938 19.0702   3
  -4   7   1 119.472 10.7380   5
  -4   7   1 105.622 11.2093   4
  -4   7   1 107.338 8.68282   4
  -4   7   1 109.561 12.5589   2
  -3   7   1 6.54516 6.17829   4
  -3   7   1 -0.4621 7.56710   2
  -3   7   1 -1.6531 8.85561   3
  -3   7   1 3.81632 4.50650   4
  -3   7   1 6.98806 4.99132   5
  -3   7   1 5.14478 4.55082   5
  -2   7   1 839.132 24.6256   2
  -2   7   1 853.118 28.5133   3
  -2   7   1 824.801 20.0107   4
  -1   7   1 19.9548 7.38550   2
  -1   7   1 15.5939 7.82872   2
  -1   7   1 22.9681 8.26186   3
  -1   7   1 19.3330 5.52552   4
   0   7   1 3289.20 63.7925   3
   0   7   1 3203.87 59.8213   2
   0   7   1 3226.68 59.3958   4
  -1  -7  -1 115.152 11.0079   4
  -1  -7  -1 101.290 8.13889   5
  -1  -7  -1 104.523 6.18831   5
   1   7   1 100.715 8.63064   2
   1   7   1 101.954 7.66830   5
   1   7   1 102.085 7.69543   5
   1   7   1 92.0681 10.1925   4
   1   7   1 95.6758 11.2522   3
  -2  -7  -1 18.3098 6.47861   5
  -2  -7  -1 7.53423 7.10716   2
  -2  -7  -1 13.2465 4.76645   5
  -2  -7  -1 10.7282 6.65618   4
   2   7   1 9.76637 5.46101   5
   2   7   1 3.92186 5.55034   2
   2   7   1 16.3301 5.18783   5
   2   7   1 6.66044 5.02617   3
   2   7   1 10.9432 5.67422   4
  -3  -7  -1 681.280 18.9132   5
  -3  -7  -1 671.897 20.8955   5
  -3  -7  -1 674.042 20.5223   2
  -3  -7  -1 671.336 21.4832   4
   3   7   1 693.162 15.7051   3
   3   7   1 711.273 20.8550   4
   3   7   1 699.581 20.4009   5
   3   7   1 682.087 19.9305   5
   3   7   1 684.711 19.2986   2
   3   7   1 676.312 16.3345   3
  -4  -7  -1 -4.3606 8.16712   5
  -4  -7  -1 -2.4494 6.21528   5
  -4  -7  -1 -0.9049 7.28853   2
  -4  -7  -1 -2.5760 6.72617   4
   4   7   1 -2.6188 5.89349   4
   4   7   1 1.43928 6.80389   5
   4   7   1 -7.0530 6.20890   2
   4   7   1 1.02803 5.77680   5
  -5  -7  -1 71.2733 10.8866   5
  -5  -7  -1 89.6616 11.1047   2
  -5  -7  -1 61.5332 11.7011   5
  -5  -7  -1 86.9802 10.9245   4
   5   7   1 72.0965 10.8354   5
   5   7   1 63.3950 9.97958   5
   5   7   1 76.1481 9.58807   2
  -6  -7  -1 161.025 16.6907   4
  -6  -7  -1 199.620 17.6911   5
  -6  -7  -1 197.986 17.3825   2
  -6  -7  -1 195.432 26.3996   5
   6   7   1 143.462 17.5460   5
   6   7   1 190.682 17.9107   5
   6   7   1 174.427 16.1007   4
   6   7   1 194.801 16.3081   2
  -7  -7  -1 358.977 26.1106   5
  -7  -7  -1 316.575 21.9333   5
  -7  -7  -1 329.100 21.1153   2
  -7  -7  -1 359.349 21.3159   4
   7   7   1 353.300 23.7393   5
   7   7   1 324.531 23.4676   5
   7   7   1 324.012 20.4048   4
   7   7   1 348.930 20.7874   2
  -8  -7  -1 -1.9948 13.1711   5
  -8  -7  -1 20.1984 13.0759   2
  -8  -7  -1 -1.2726 15.6853   5
  -8  -7  -1 -3.7963 11.4964   4
   8   7   1 -0.1253 11.6457   2
   8   7   1 14.8783 11.1972   4
   8   7   1 12.2712 15.6495   5
   8   7   1 1.73983 13.9987   5
  -9  -7  -1 51.7266 16.9752   2
  -9  -7  -1 43.9008 17.4649   5
  -9  -7  -1 55.1317 19.5778   5
  -9  -7  -1 33.5880 14.2325   4
   9   7   1 46.8432 15.8664   2
   9   7   1 56.0699 16.7842   5
   9   7   1 67.7463 15.2360   4
   9   7   1 43.3003 12.9920   5
 -10  -7  -1 201.560 20.9375   4
 -10  -7  -1 205.240 23.5302   2
 -10  -7  -1 177.941 23.9406   5
 -10  -7  -1 195.928 28.0032   5
  10   7   1 181.312 21.6124   2
  10   7   1 174.613 20.5833   4
  10   7   1 150.251 20.1553   5
  10   7   1 234.586 28.7292   5
 -11  -7  -1 82.7046 23.7349   2
 -11  -7  -1 172.520 27.5757   5
 -11  -7  -1 107.905 21.1612   4
 -11  -7  -1 112.651 29.5005   5
  11   7   1 132.305 22.0925   4
  11   7   1 67.8388 23.4162   2
  11   7   1 114.100 22.6814   5
  11   7   1 149.241 30.5550   5
 -12  -7  -1 21.5530 27.8467   5
 -12  -7  -1 72.5845 39.1996   5
 -12  -7  -1 -31.036 24.6403   2
 -12  -7  -1 -9.6716 21.6885   4
  12   7   1 -4.7279 30.7601   5
  12   7   1 30.2887 24.5420   4
  12   7   1 2.22650 32.0357   5
 -13  -7  -1 62.3178 32.5655   2
 -13  -7  -1 50.9145 26.7195   4
 -13  -7  -1 1.95480 35.0421   5
  13   7   1 115.350 40.7874   5
  11  -8  -1 117.710 28.8046   5
 -11   8   1 106.773 29.2744   2
 -11   8   1 70.3363 37.9962   3
  10  -8  -1 10.2142 19.4028   5
  10  -8  -1 10.5633 18.8277   5
 -10   8   1 26.2217 23.9935   5
 -10   8   1 -11.629 28.2939   3
 -10   8   1 29.3825 23.3759   2
   9  -8  -1 63.9347 28.3894   2
   9  -8  -1 103.869 17.4598   5
   9  -8  -1 97.5319 18.9750   5
  -9   8   1 75.0817 20.3264   5
  -9   8   1 66.0224 32.6826   3
  -9   8   1 83.7249 19.9297   5
  -9   8   1 107.166 21.3716   2
  -9   8   1 80.8793 26.7393   3
   8  -8  -1 85.4721 14.6579   5
   8  -8  -1 63.2132 23.2935   2
   8  -8  -1 83.7723 16.3541   5
  -8   8   1 63.9223 17.0109   5
  -8   8   1 61.0862 23.5816   3
  -8   8   1 99.3480 28.5063   3
  -8   8   1 60.7394 18.0889   2
  -8   8   1 62.8765 15.1538   5
   7  -8  -1 46.1263 19.1759   2
   7  -8  -1 57.0654 13.5386   5
   7  -8  -1 53.1018 11.5125   5
  -7   8   1 58.2789 22.5696   3
  -7   8   1 46.3901 13.1182   5
  -7   8   1 55.2818 18.8206   2
  -7   8   1 26.7734 18.8070   3
  -7   8   1 46.1845 12.8094   5
   6  -8  -1 395.866 18.1929   5
   6  -8  -1 419.951 31.6656   2
  -6   8   1 425.834 20.5403   5
  -6   8   1 448.925 25.8224   2
  -6   8   1 412.089 20.1401   5
  -6   8   1 409.265 16.0073   4
  -6   8   1 433.152 35.3402   3
  -6   8   1 381.962 42.6677   3
  -6   8   1 397.336 13.3468   4
   5  -8  -1 30.5685 8.14753   5
   5  -8  -1 19.1834 14.6973   2
   5  -8  -1 44.0387 8.21401   5
  -5   8   1 30.6841 12.1066   2
  -5   8   1 29.3626 9.02518   5
  -5   8   1 42.3901 6.44452   4
  -5   8   1 37.2385 8.30468   4
  -5   8   1 29.4485 8.78008   5
  -5   8   1 49.8268 15.9398   3
   4  -8  -1 20.6294 6.00585   5
   4  -8  -1 21.8998 6.72248   5
  -4   8   1 25.5937 8.07381   4
  -4   8   1 28.2738 7.50229   5
  -4   8   1 18.5764 12.0991   3
  -4   8   1 27.8404 6.28330   4
  -4   8   1 31.6426 7.47668   5
  -4   8   1 29.4647 11.1087   2
  -3   8   1 78.2082 8.75553   5
  -3   8   1 60.5480 10.6212   2
  -3   8   1 55.7727 8.83401   4
  -3   8   1 73.4531 7.43380   4
  -3   8   1 59.2663 13.8437   3
  -2   8   1 753.754 28.7173   3
  -2   8   1 760.374 24.8604   2
  -2   8   1 723.520 19.8145   4
  -1   8   1 111.133 11.2022   2
  -1   8   1 110.354 11.8555   2
  -1   8   1 128.650 15.7732   3
  -1   8   1 114.203 10.5235   4
   0   8   1 1492.17 33.0822   4
   0   8   1 1519.96 37.3984   3
   0   8   1 1470.64 33.4765   2
   1   8   1 286.640 13.9489   2
   1   8   1 310.239 10.7160   5
   1   8   1 294.209 15.5984   3
   1   8   1 285.578 14.3739   4
   1   8   1 295.617 11.2205   5
  -2  -8  -1 214.426 15.1587   2
  -2  -8  -1 213.611 14.9335   4
  -2  -8  -1 223.338 12.0963   5
  -2  -8  -1 201.040 9.99723   5
   2   8   1 217.770 11.4390   5
   2   8   1 215.204 12.4983   2
   2   8   1 195.110 13.3150   4
   2   8   1 205.534 12.2980   3
   2   8   1 216.676 13.5846   3
  -3  -8  -1 363.897 14.5186   5
  -3  -8  -1 376.782 17.0464   5
  -3  -8  -1 377.183 17.9191   2
  -3  -8  -1 368.399 17.9238   4
   3   8   1 368.821 13.4999   3
   3   8   1 381.597 15.7978   5
   3   8   1 348.876 12.3601   3
   3   8   1 356.199 16.5998   4
   3   8   1 361.380 15.5353   2
   3   8   1 367.721 15.6644   5
  -4  -8  -1 16.2472 8.05323   5
  -4  -8  -1 20.9569 9.19304   2
  -4  -8  -1 15.5103 9.15352   5
  -4  -8  -1 6.76024 8.13668   4
   4   8   1 20.1404 9.11424   5
   4   8   1 18.5323 7.73430   4
   4   8   1 26.2856 8.37089   5
   4   8   1 32.4298 8.18373   2
  -5  -8  -1 213.030 17.3128   2
  -5  -8  -1 214.498 20.1534   5
  -5  -8  -1 211.955 15.8244   5
  -5  -8  -1 223.101 17.3270   4
   5   8   1 221.240 15.4591   2
   5   8   1 221.618 16.7457   5
   5   8   1 192.743 16.9001   5
   5   8   1 205.430 16.4192   4
  -6  -8  -1 6.26350 10.1072   4
  -6  -8  -1 2.45616 10.7675   2
  -6  -8  -1 -10.590 9.52714   5
  -6  -8  -1 21.3250 12.7458   5
   6   8   1 -0.4714 10.4611   5
   6   8   1 6.28080 9.78558   2
   6   8   1 11.0741 9.62739   4
   6   8   1 -0.9422 9.58325   5
  -7  -8  -1 43.1031 13.2158   2
  -7  -8  -1 60.9660 13.6061   4
  -7  -8  -1 49.8286 19.3352   5
  -7  -8  -1 60.5117 14.3456   5
   7   8   1 46.2058 11.9120   2
   7   8   1 29.9697 13.4320   5
   7   8   1 44.7950 12.7061   5
   7   8   1 57.9084 12.5399   4
  -8  -8  -1 105.339 17.0368   2
  -8  -8  -1 98.0986 20.2986   5
  -8  -8  -1 88.0819 15.1858   4
   8   8   1 107.113 15.4811   2
   8   8   1 83.5522 17.3084   5
   8   8   1 146.175 20.6655   5
   8   8   1 105.000 15.3359   4
  -9  -8  -1 168.089 19.5541   4
  -9  -8  -1 181.984 20.4877   2
  -9  -8  -1 201.313 22.2667   5
  -9  -8  -1 173.660 26.0774   5
   9   8   1 182.883 19.7121   4
   9   8   1 199.937 24.2064   5
   9   8   1 177.523 24.3483   5
   9   8   1 181.986 20.0548   2
 -10  -8  -1 32.0503 20.3911   2
 -10  -8  -1 30.1789 23.8247   5
 -10  -8  -1 62.2150 19.1520   4
 -10  -8  -1 44.4047 20.9998   5
  10   8   1 36.6423 19.8804   2
  10   8   1 38.6730 18.9266   5
  10   8   1 29.6754 19.3305   5
  10   8   1 39.0766 17.9006   4
 -11  -8  -1 -27.439 19.6764   4
 -11  -8  -1 -21.994 22.7075   5
 -11  -8  -1 -20.210 21.2498   2
 -11  -8  -1 1.52271 27.1904   5
  11   8   1 0.60585 20.7239   4
  11   8   1 -10.412 20.2080   2
  11   8   1 -11.510 21.8888   5
  11   8   1 -34.254 26.4774   5
 -12  -8  -1 7.04190 28.9259   5
 -12  -8  -1 -16.562 23.3501   4
 -12  -8  -1 2.50343 26.5506   2
  12   8   1 44.0182 32.3579   5
  12   8   1 19.7568 28.5856   5
 -11   9   1 17.2693 29.1512   2
  10  -9  -1 56.5509 20.4387   5
  10  -9  -1 66.5004 23.3186   5
 -10   9   1 66.6494 33.8186   3
 -10   9   1 16.3814 25.0219   2
   9  -9  -1 -34.640 29.2982   2
   9  -9  -1 -17.788 15.3732   5
   9  -9  -1 -0.9839 17.0109   5
  -9   9   1 -1.5369 26.6252   3
  -9   9   1 16.9950 20.2309   5
  -9   9   1 -9.1559 20.8389   2
   8  -9  -1 33.4364 15.0426   5
   8  -9  -1 67.9561 25.8017   2
   8  -9  -1 44.8041 13.8877   5
  -8   9   1 30.9469 15.4044   5
  -8   9   1 39.0824 24.9820   3
  -8   9   1 22.8040 20.2760   2
  -8   9   1 31.9060 28.9124   3
  -8   9   1 39.0851 17.5434   5
   7  -9  -1 96.3223 22.9340   2
   7  -9  -1 87.9069 13.0721   5
   7  -9  -1 80.0862 13.8912   5
  -7   9   1 63.6490 21.6124   3
  -7   9   1 83.9355 14.5786   5
  -7   9   1 109.716 15.3244   5
  -7   9   1 77.5885 7.60081   4
  -7   9   1 91.3010 18.0206   2
  -7   9   1 76.8508 25.3962   3
   6  -9  -1 87.2474 11.8407   5
   6  -9  -1 82.6763 11.1470   5
  -6   9   1 94.2060 10.5930   4
  -6   9   1 93.9881 12.6595   5
  -6   9   1 97.2245 16.2123   2
  -6   9   1 71.7622 23.1964   3
  -6   9   1 89.7885 10.9035   4
  -6   9   1 90.4211 22.2919   3
  -6   9   1 91.5953 12.8654   5
   5  -9  -1 103.221 11.7433   5
   5  -9  -1 101.784 10.0772   5
  -5   9   1 117.199 11.6573   5
  -5   9   1 104.045 11.4164   4
  -5   9   1 111.163 11.3814   5
  -5   9   1 101.651 21.2929   3
  -5   9   1 112.212 15.8720   2
  -5   9   1 110.125 22.0861   3
  -5   9   1 109.273 9.31612   4
  -4   9   1 -17.008 8.27687   4
  -4   9   1 -1.1642 12.6091   3
  -4   9   1 1.59170 6.19120   4
  -4   9   1 5.50618 7.16248   5
  -4   9   1 3.81907 10.5054   2
  -4   9   1 11.4364 7.23958   5
  -3   9   1 246.957 19.5136   2
  -3   9   1 233.730 13.0760   4
  -3   9   1 263.792 23.7094   3
  -3   9   1 228.668 16.9125   4
  -2   9   1 14.5671 8.45217   4
  -2   9   1 18.0412 9.59854   2
  -2   9   1 7.39346 10.3337   2
  -2   9   1 4.36449 6.01316   4
  -2   9   1 17.5809 11.8851   3
  -1   9   1 250.424 20.3371   3
  -1   9   1 237.355 18.1067   2
  -1   9   1 221.142 16.3331   2
  -1   9   1 246.235 14.0685   4
   0   9   1 171.312 17.0881   3
   0   9   1 165.889 14.4772   2
   0   9   1 166.758 13.4744   4
   1   9   1 53.0302 9.68831   3
   1   9   1 74.6518 9.65529   4
   1   9   1 54.2977 10.7850   3
   1   9   1 54.1228 9.07577   2
   1   9   1 53.1593 6.71997   5
   1   9   1 55.3429 6.15708   5
  -2  -9  -1 -4.1305 8.84353   2
  -2  -9  -1 -1.8223 6.84772   5
  -2  -9  -1 7.88358 5.60772   5
   2   9   1 -11.685 7.40426   3
   2   9   1 1.58198 7.14369   3
   2   9   1 -1.7696 6.83021   2
   2   9   1 0.20060 6.24913   5
   2   9   1 6.02832 6.10024   5
  -3  -9  -1 38.8955 10.3437   4
  -3  -9  -1 21.2445 10.2362   2
  -3  -9  -1 25.8488 7.43518   5
  -3  -9  -1 32.5433 9.42045   5
   3   9   1 27.3995 7.46298   3
   3   9   1 30.8660 8.19857   5
   3   9   1 25.8286 6.77470   3
   3   9   1 28.1484 8.01902   5
   3   9   1 37.5236 8.88224   2
   3   9   1 20.8278 8.46298   4
  -4  -9  -1 53.2089 11.6085   4
  -4  -9  -1 69.8496 11.9078   2
  -4  -9  -1 70.8733 11.4888   5
  -4  -9  -1 67.1609 9.71546   5
   4   9   1 72.4999 10.4039   2
   4   9   1 55.5373 10.2427   5
   4   9   1 60.6733 10.4664   5
   4   9   1 51.1000 10.1787   4
  -5  -9  -1 9.46522 11.9276   5
  -5  -9  -1 -1.0572 10.0011   4
  -5  -9  -1 -1.7205 8.33208   5
  -5  -9  -1 -3.9293 11.2250   2
   5   9   1 0.11059 9.24099   5
   5   9   1 9.01092 9.66487   5
   5   9   1 4.56514 8.93831   4
   5   9   1 7.08537 9.17988   2
  -6  -9  -1 231.940 24.6391   5
  -6  -9  -1 233.033 20.3342   5
  -6  -9  -1 218.838 21.3908   4
  -6  -9  -1 220.402 21.7165   2
   6   9   1 237.449 20.9741   5
   6   9   1 225.487 20.6159   5
   6   9   1 203.526 18.5538   2
   6   9   1 256.960 19.9871   4
  -7  -9  -1 38.8267 14.0848   5
  -7  -9  -1 44.5627 13.7434   2
  -7  -9  -1 52.9643 13.9902   4
  -7  -9  -1 21.4360 18.1486   5
   7   9   1 62.6377 15.2050   5
   7   9   1 45.3627 12.9883   2
   7   9   1 63.1874 13.5208   4
   7   9   1 38.6318 14.9588   5
  -8  -9  -1 -17.138 14.7374   5
  -8  -9  -1 -10.889 14.4965   4
  -8  -9  -1 -1.2609 21.9212   5
  -8  -9  -1 -3.3355 15.2496   2
   8   9   1 -16.963 12.7794   4
   8   9   1 2.70228 14.0972   2
   8   9   1 3.65800 16.4522   5
   8   9   1 0.84663 17.3140   5
  -9  -9  -1 30.0293 18.6051   5
  -9  -9  -1 0.50600 22.9073   5
  -9  -9  -1 48.4513 17.7924   2
  -9  -9  -1 33.4429 18.0288   4
   9   9   1 48.6059 16.9639   4
   9   9   1 64.7859 18.4950   5
   9   9   1 7.02706 19.0503   5
   9   9   1 25.5328 16.3866   2
 -10  -9  -1 56.5718 25.7182   5
 -10  -9  -1 51.2140 22.2147   2
 -10  -9  -1 46.7795 19.8398   4
 -10  -9  -1 83.9939 22.7827   5
  10   9   1 52.2595 25.1989   5
  10   9   1 51.5007 20.1777   4
  10   9   1 39.8887 21.2165   2
  10   9   1 42.1957 19.5158   5
 -11  -9  -1 113.493 24.2870   4
 -11  -9  -1 28.5480 25.5624   2
 -11  -9  -1 144.449 28.9672   5
  11   9   1 87.2719 24.1468   5
  11   9   1 101.482 31.1481   5
  11   9   1 93.3712 25.5407   2
 -12  -9  -1 7.51268 26.1538   5
 -12  -9  -1 -39.110 27.5721   2
 -12  -9  -1 80.5156 28.6211   4
  10 -10  -1 -27.834 20.2043   5
  10 -10  -1 -10.480 17.1446   5
 -10  10   1 -34.391 25.2632   2
 -10  10   1 23.7400 33.2979   3
   9 -10  -1 7.16646 18.3826   5
   9 -10  -1 -11.363 16.5742   5
  -9  10   1 -45.405 20.5374   5
  -9  10   1 3.34697 31.1914   3
  -9  10   1 -38.211 21.8126   2
   8 -10  -1 80.9683 15.5738   5
   8 -10  -1 84.0519 16.7639   5
  -8  10   1 76.8822 22.4692   2
  -8  10   1 101.519 19.1617   5
  -8  10   1 76.9172 27.1513   3
   7 -10  -1 -5.0716 12.6259   5
  -7  10   1 28.2516 14.6350   5
  -7  10   1 7.96231 22.3694   3
  -7  10   1 7.36111 14.8762   5
  -7  10   1 -3.9167 17.1328   2
  -7  10   1 -10.428 25.3650   3
  -7  10   1 1.33084 9.62546   4
   6 -10  -1 43.7538 10.3856   5
  -6  10   1 35.4365 22.5044   3
  -6  10   1 55.1168 23.8362   3
  -6  10   1 43.1095 12.4677   5
  -6  10   1 40.8014 10.9839   4
  -6  10   1 36.9303 12.3063   5
  -6  10   1 41.1014 8.52716   4
  -5  10   1 32.9373 8.43409   4
  -5  10   1 43.2638 10.2533   5
  -5  10   1 40.5558 14.8944   2
  -5  10   1 15.5608 18.2030   3
  -5  10   1 41.5018 9.98578   5
  -5  10   1 26.4198 21.0877   3
  -5  10   1 35.4145 11.0121   4
  -4  10   1 20.2199 7.69375   4
  -4  10   1 39.3581 11.3575   4
  -4  10   1 12.8200 17.8817   3
  -4  10   1 36.3249 13.4224   2
  -4  10   1 29.9175 17.1522   3
  -3  10   1 67.1702 9.40682   4
  -3  10   1 50.2384 17.4061   3
  -3  10   1 49.4041 11.6026   4
  -3  10   1 77.2778 13.9135   2
  -3  10   1 62.2951 16.6485   3
  -2  10   1 38.8844 10.9544   4
  -2  10   1 22.9623 13.4340   3
  -2  10   1 14.2698 7.58497   4
  -2  10   1 12.1501 11.9419   2
  -2  10   1 18.4163 14.7207   3
  -2  10   1 26.4015 11.6399   2
  -1  10   1 320.227 23.9517   3
  -1  10   1 349.034 17.4573   4
  -1  10   1 336.453 25.7997   3
  -1  10   1 319.992 21.7140   2
  -1  10   1 380.345 20.5085   2
   0  10   1 38.3496 11.7486   3
   0  10   1 31.1096 10.2588   4
   0  10   1 53.1503 13.4030   3
   0  10   1 45.5619 10.5038   2
   1  10   1 22.0366 8.90146   4
   1  10   1 15.0591 9.93782   3
   1  10   1 16.2807 10.2907   3
   1  10   1 20.8844 9.18826   2
  -2 -10  -1 330.742 14.7051   5
   2  10   1 314.104 19.0211   4
   2  10   1 328.093 17.3576   3
   2  10   1 329.427 13.8260   5
   2  10   1 318.329 18.8419   3
   2  10   1 306.912 17.3496   2
   2  10   1 320.639 15.3767   5
  -3 -10  -1 40.8751 10.4343   5
  -3 -10  -1 52.0671 12.7572   2
  -3 -10  -1 47.9780 8.41123   5
   3  10   1 50.8606 10.3580   2
   3  10   1 44.6784 9.11538   3
   3  10   1 34.7498 9.99669   4
   3  10   1 49.2862 9.14102   5
   3  10   1 54.3308 8.61492   3
  -4 -10  -1 52.5056 13.0063   4
  -4 -10  -1 73.3885 13.1317   5
  -4 -10  -1 66.9923 10.6321   5
  -4 -10  -1 64.0753 13.8302   2
   4  10   1 59.4360 11.3438   2
   4  10   1 66.0621 11.1455   5
   4  10   1 55.9799 11.5651   4
   4  10   1 77.8430 11.3303   5
  -5 -10  -1 -2.5313 12.8853   2
  -5 -10  -1 -4.8903 12.8840   5
   5  10   1 -3.2238 10.6642   5
   5  10   1 -14.589 10.3033   5
   5  10   1 6.02440 10.6227   4
  -6 -10  -1 0.17239 11.5482   5
  -6 -10  -1 -2.2821 15.0625   5
  -6 -10  -1 -24.773 13.3462   2
  -6 -10  -1 -20.100 12.7724   4
   6  10   1 -3.5593 10.8921   4
   6  10   1 -9.2951 11.9197   5
   6  10   1 27.0209 13.4757   5
   6  10   1 -6.1868 11.2683   2
  -7 -10  -1 70.5604 16.0923   5
  -7 -10  -1 75.7025 17.2589   4
  -7 -10  -1 65.3083 20.0011   5
  -7 -10  -1 77.4547 17.2389   2
   7  10   1 43.5740 14.8173   2
   7  10   1 51.3260 14.4955   4
   7  10   1 85.8240 16.7602   5
   7  10   1 71.3725 16.5839   5
  -8 -10  -1 41.1636 18.3646   2
  -8 -10  -1 9.32197 16.9632   5
  -8 -10  -1 26.1899 20.8636   5
  -8 -10  -1 23.9345 17.1165   4
   8  10   1 23.0622 18.5848   5
   8  10   1 45.8730 16.9732   4
   8  10   1 27.6926 15.4089   2
   8  10   1 32.0429 19.9047   5
  -9 -10  -1 -1.2458 18.1787   5
  -9 -10  -1 -17.415 18.5407   4
  -9 -10  -1 9.33548 19.2302   2
   9  10   1 29.2902 18.9348   4
   9  10   1 -12.014 22.8628   5
   9  10   1 30.1023 37.5452   5
   9  10   1 39.3625 18.3450   2
 -10 -10  -1 36.1779 25.0770   2
 -10 -10  -1 29.8400 22.9142   5
 -10 -10  -1 -11.961 21.4136   4
 -10 -10  -1 32.0836 26.9839   5
  10  10   1 -5.7609 21.8075   2
  10  10   1 29.3768 27.3358   5
  10  10   1 50.2997 26.2385   5
 -11 -10  -1 -36.663 24.7478   5
 -11 -10  -1 -10.325 25.5919   4
 -11 -10  -1 3.57052 24.8606   2
   9 -11  -1 -7.6865 19.2729   5
   9 -11  -1 -3.9806 17.9413   5
  -9  11   1 -48.178 24.9058   2
  -9  11   1 23.5021 33.8975   3
  -9  11   1 -14.274 21.8547   5
   8 -11  -1 47.2957 15.9636   5
  -8  11   1 -7.4603 28.8040   3
  -8  11   1 36.9172 22.3419   2
  -8  11   1 38.6163 19.5005   5
  -7  11   1 48.6812 21.3909   2
  -7  11   1 33.3406 15.8059   5
  -7  11   1 36.8250 12.4726   4
  -7  11   1 31.4826 25.1147   3
  -7  11   1 44.8864 13.8565   5
  -7  11   1 65.6485 10.2708   4
  -6  11   1 -14.290 10.8830   5
  -6  11   1 8.04014 22.0479   3
  -6  11   1 7.84359 12.2816   4
  -6  11   1 -15.014 26.5996   3
  -6  11   1 24.7799 12.7490   5
  -6  11   1 5.38374 9.15732   4
  -6  11   1 -19.343 16.2949   2
  -5  11   1 -12.954 12.3600   4
  -5  11   1 5.67000 19.1979   3
  -5  11   1 3.11344 14.8901   2
  -5  11   1 -7.0625 21.9537   3
  -5  11   1 -1.9802 8.59473   4
  -4  11   1 20.0063 9.38422   4
  -4  11   1 15.2826 12.3101   4
  -4  11   1 -3.5418 19.9909   3
  -4  11   1 24.3035 19.0118   3
  -4  11   1 15.0483 14.1008   2
  -3  11   1 -4.6355 13.4995   2
  -3  11   1 15.9857 9.57613   4
  -3  11   1 51.7114 14.3547   2
  -3  11   1 28.5417 17.1864   3
  -3  11   1 9.50603 17.9687   3
  -3  11   1 33.8468 12.9047   4
  -2  11   1 15.7835 16.5254   3
  -2  11   1 27.2332 15.5568   2
  -2  11   1 38.3629 12.5156   4
  -2  11   1 17.7760 11.1041   4
  -2  11   1 47.0927 15.6396   3
  -2  11   1 37.6874 14.0331   2
  -1  11   1 135.639 18.8693   3
  -1  11   1 121.195 17.5733   3
  -1  11   1 143.063 16.9998   2
  -1  11   1 139.850 15.6251   2
  -1  11   1 134.140 12.8209   4
   0  11   1 16.1029 12.2499   3
   0  11   1 2.43201 13.0145   3
   0  11   1 0.92558 9.06170   4
   0  11   1 15.0745 10.6011   2
   0  11   1 8.52780 12.5794   2
   1  11   1 112.951 13.2858   2
   1  11   1 132.644 18.6105   3
   1  11   1 129.812 13.6881   4
   1  11   1 121.422 15.5976   3
   2  11   1 21.6857 7.71133   5
   2  11   1 20.6063 10.0303   3
   2  11   1 19.6602 8.12984   5
   2  11   1 1.25758 10.4982   4
   2  11   1 15.8060 11.2731   3
   2  11   1 -2.0080 9.44898   2
  -3 -11  -1 -9.0330 13.4854   2
  -3 -11  -1 3.33490 7.58491   5
  -3 -11  -1 -8.2912 10.1623   5
   3  11   1 3.82779 10.2435   2
   3  11   1 -4.7863 9.32587   3
   3  11   1 3.55576 8.56486   5
   3  11   1 -7.8013 8.29195   3
   3  11   1 -10.371 8.86454   5
   3  11   1 -21.197 9.56987   4
  -4 -11  -1 96.3752 16.7954   2
  -4 -11  -1 78.5408 14.1026   5
  -4 -11  -1 85.2159 11.5336   5
   4  11   1 83.1526 14.2564   4
   4  11   1 95.7614 15.7656   2
   4  11   1 79.5841 8.66248   3
   4  11   1 102.480 9.86940   3
   4  11   1 82.5073 12.9205   5
  -5 -11  -1 162.254 15.6744   5
  -5 -11  -1 153.325 17.7759   5
  -5 -11  -1 171.491 19.3885   2
   5  11   1 200.012 20.8992   5
   5  11   1 168.610 16.5554   4
   5  11   1 159.355 16.2934   2
   5  11   1 163.964 18.0175   5
  -6 -11  -1 30.3561 13.0675   5
  -6 -11  -1 44.5588 16.6645   2
  -6 -11  -1 21.5715 15.8058   4
  -6 -11  -1 7.98949 15.9972   5
   6  11   1 14.2997 13.8428   5
   6  11   1 32.7709 14.4344   4
   6  11   1 24.9885 12.6588   2
   6  11   1 21.4519 14.1722   5
  -7 -11  -1 116.755 17.8703   5
  -7 -11  -1 100.428 20.0823   5
  -7 -11  -1 86.4458 19.6201   4
  -7 -11  -1 87.4339 19.1668   2
   7  11   1 94.6670 20.1680   5
   7  11   1 91.2143 17.1896   2
   7  11   1 113.192 18.9641   4
   7  11   1 101.119 18.9513   5
  -8 -11  -1 -0.3300 19.6074   2
  -8 -11  -1 11.9999 17.3158   5
  -8 -11  -1 -18.011 19.3845   5
  -8 -11  -1 -25.358 18.7676   4
   8  11   1 29.8635 18.6875   4
   8  11   1 17.8915 20.1099   5
   8  11   1 17.9251 16.3934   2
   8  11   1 3.13727 18.4633   5
  -9 -11  -1 -20.439 21.4783   4
  -9 -11  -1 -27.504 27.3357   5
  -9 -11  -1 25.9206 20.3105   5
  -9 -11  -1 -7.1047 21.6292   2
   9  11   1 -23.367 21.2899   5
   9  11   1 -3.7585 19.5739   2
 -10 -11  -1 15.1570 23.2320   5
 -10 -11  -1 -41.987 24.1298   2
  10  11   1 -37.199 23.0895   2
 -11 -11  -1 -7.4066 29.0417   5
 -11 -11  -1 11.8514 29.2233   2
  -8  12   1 166.643 29.7781   2
  -8  12   1 91.2106 34.5533   3
  -8  12   1 160.733 24.2055   5
  -7  12   1 140.462 32.9057   3
  -7  12   1 160.412 13.3502   4
  -7  12   1 186.706 26.1235   2
  -7  12   1 205.376 19.3540   5
  -7  12   1 181.089 17.3982   4
  -6  12   1 45.3527 11.6904   4
  -6  12   1 60.2369 20.4413   2
  -6  12   1 44.2776 27.3692   3
  -6  12   1 49.9246 15.4811   4
  -6  12   1 12.0960 32.3920   3
  -5  12   1 30.6236 14.5990   4
  -5  12   1 21.4654 27.3635   3
  -5  12   1 18.8920 11.0888   4
  -5  12   1 25.7584 23.6376   3
  -5  12   1 1.37138 17.0257   2
  -4  12   1 58.8395 19.5273   2
  -4  12   1 44.1695 15.4317   4
  -4  12   1 45.4717 17.1347   2
  -4  12   1 49.4125 12.8192   4
  -4  12   1 30.8395 23.1732   3
  -4  12   1 23.3586 20.1543   3
  -3  12   1 214.509 21.2601   2
  -3  12   1 223.231 19.8743   4
  -3  12   1 203.454 18.7546   4
  -3  12   1 226.601 26.3015   3
  -3  12   1 218.837 29.2813   3
  -3  12   1 244.316 22.8664   2
  -2  12   1 341.808 35.2707   3
  -2  12   1 391.485 21.4577   4
  -2  12   1 326.962 27.4580   2
  -2  12   1 363.634 31.2282   3
  -2  12   1 392.794 27.3004   4
  -2  12   1 391.396 28.0714   2
  -1  12   1 180.716 17.7500   2
  -1  12   1 168.376 19.5853   2
  -1  12   1 201.466 25.8801   3
  -1  12   1 159.235 15.1934   4
  -1  12   1 190.876 23.4285   3
   0  12   1 274.067 25.2436   2
   0  12   1 221.646 24.6573   3
   0  12   1 229.365 31.3716   3
   0  12   1 260.776 26.6066   2
   0  12   1 252.638 20.5684   4
   1  12   1 -4.2578 12.9987   3
   1  12   1 2.53291 11.1449   4
   1  12   1 1.28934 12.0331   3
   1  12   1 17.9648 12.0379   2
   2  12   1 188.959 22.1141   3
   2  12   1 167.257 19.7582   3
   2  12   1 149.934 14.7782   5
   2  12   1 148.301 16.3877   4
   2  12   1 182.519 19.3726   2
   2  12   1 155.539 13.5925   5
  -3 -12  -1 -0.0740 7.94803   5
   3  12   1 -12.293 10.1081   5
   3  12   1 -4.6784 12.0946   2
   3  12   1 -4.0695 9.69238   3
   3  12   1 12.1132 11.8457   4
   3  12   1 0.06932 11.3017   3
   3  12   1 -9.0556 8.82714   5
  -4 -12  -1 -14.126 12.6226   5
  -4 -12  -1 -26.113 15.7012   2
  -4 -12  -1 1.86385 10.0334   5
   4  12   1 34.7127 12.1725   5
   4  12   1 5.31655 9.39751   3
   4  12   1 6.77094 11.4576   5
   4  12   1 2.16141 12.4792   2
   4  12   1 -4.2932 8.65120   3
   4  12   1 -7.6508 12.6289   4
  -5 -12  -1 104.009 14.3432   5
  -5 -12  -1 94.4072 17.5493   5
  -5 -12  -1 118.721 19.8938   2
   5  12   1 130.167 16.5508   2
   5  12   1 102.451 15.5049   5
   5  12   1 108.209 17.1045   4
  -6 -12  -1 24.9907 18.0063   2
  -6 -12  -1 15.1759 17.1673   5
  -6 -12  -1 16.4240 14.2134   5
   6  12   1 35.0512 15.2597   2
   6  12   1 13.3284 16.6474   5
   6  12   1 20.7706 15.0701   5
   6  12   1 2.85303 15.7541   4
  -7 -12  -1 26.7533 20.6480   2
  -7 -12  -1 23.7783 20.9956   5
  -7 -12  -1 7.54566 16.3772   5
   7  12   1 -10.636 18.0759   5
   7  12   1 1.72048 19.2454   5
   7  12   1 13.8066 16.9327   2
   7  12   1 -6.9047 18.2924   4
  -8 -12  -1 2.50838 17.7509   5
  -8 -12  -1 -2.3070 23.1301   5
  -8 -12  -1 -49.004 21.2040   2
   8  12   1 -33.322 21.7361   5
   8  12   1 31.7870 19.2527   2
  -9 -12  -1 20.5205 25.8128   2
  -9 -12  -1 30.8258 21.0048   5
   9  12   1 26.6171 27.0852   5
   9  12   1 10.3894 23.5449   2
 -10 -12  -1 25.7622 25.1138   5
 -10 -12  -1 22.6905 28.5799   2
  -7  13   1 20.8036 32.6107   3
  -7  13   1 35.4346 25.5547   2
  -6  13   1 6.29875 30.4872   3
  -6  13   1 -2.3578 13.2988   4
  -6  13   1 1.74602 18.0847   4
  -6  13   1 -29.323 22.0788   2
  -5  13   1 -8.7619 14.4593   4
  -5  13   1 -7.0433 17.2436   4
  -5  13   1 -2.0969 27.9152   3
  -5  13   1 19.7544 20.9494   2
  -5  13   1 33.4735 23.5989   2
  -5  13   1 10.3437 26.4667   3
  -4  13   1 -1.0332 23.4365   3
  -4  13   1 -4.7224 19.5612   2
  -4  13   1 -14.799 16.5695   4
  -4  13   1 -15.752 18.2871   2
  -4  13   1 18.5159 13.0549   4
  -4  13   1 -10.445 25.9483   3
  -3  13   1 26.3954 21.0119   3
  -3  13   1 28.6456 18.7114   2
  -3  13   1 1.77816 12.5897   4
  -3  13   1 32.6880 23.4733   3
  -3  13   1 61.3219 17.4927   4
  -3  13   1 28.9457 18.1464   2
  -2  13   1 145.965 19.9235   4
  -2  13   1 137.906 22.8136   3
  -2  13   1 98.2481 15.0071   4
  -2  13   1 129.617 19.7498   2
  -2  13   1 136.184 25.0745   3
  -2  13   1 100.705 19.2634   2
  -1  13   1 489.122 34.1009   3
  -1  13   1 511.797 29.5675   2
  -1  13   1 489.073 31.7290   4
  -1  13   1 533.131 33.2667   2
  -1  13   1 498.484 26.1398   4
  -1  13   1 568.954 38.3336   3
   0  13   1 10.0902 17.3080   3
   0  13   1 10.4472 15.9685   3
   0  13   1 1.26677 16.0727   2
   0  13   1 12.9326 12.8278   4
   0  13   1 18.7878 15.0508   2
   1  13   1 46.1918 14.0335   4
   1  13   1 57.2230 15.1947   2
   1  13   1 53.0181 20.1681   3
   1  13   1 51.3178 15.5471   3
   2  13   1 126.349 18.0399   3
   2  13   1 144.907 17.3566   2
   2  13   1 147.752 17.7463   4
   2  13   1 129.905 16.7592   3
   3  13   1 20.7570 14.7845   4
   3  13   1 37.1801 14.5148   3
   3  13   1 22.0199 11.9107   3
   3  13   1 48.6385 14.8040   2
   3  13   1 35.4974 11.7683   5
  -4 -13  -1 40.0391 19.3749   2
  -4 -13  -1 51.7861 11.9120   5
  -4 -13  -1 55.6201 14.6398   5
   4  13   1 50.2251 14.8441   5
   4  13   1 60.5738 12.4482   3
   4  13   1 16.1654 10.6649   3
   4  13   1 50.0584 15.3004   2
   4  13   1 38.3021 13.4403   5
   4  13   1 45.7342 16.4244   4
  -5 -13  -1 245.829 21.5349   5
  -5 -13  -1 260.941 28.4688   5
  -5 -13  -1 350.967 33.8760   2
   5  13   1 240.970 28.2663   5
   5  13   1 279.192 26.3953   2
   5  13   1 298.340 25.4733   5
   5  13   1 232.433 22.9828   4
  -6 -13  -1 29.2741 19.4299   5
  -6 -13  -1 80.7931 37.3291   2
  -6 -13  -1 90.4493 16.6731   5
   6  13   1 59.0122 30.1006   4
   6  13   1 79.5143 18.2357   2
   6  13   1 110.779 21.1923   5
  -7 -13  -1 -28.031 23.5515   2
  -7 -13  -1 14.7181 21.9790   5
  -7 -13  -1 -4.7134 17.2670   5
   7  13   1 6.27238 18.6889   2
   7  13   1 7.30264 19.9795   5
  -8 -13  -1 62.5454 26.0135   5
  -8 -13  -1 7.94379 20.3554   5
  -8 -13  -1 78.5389 27.8013   2
   8  13   1 -58.677 21.7421   2
   8  13   1 -5.7252 24.2411   5
  -9 -13  -1 -9.2931 22.1078   5
  -9 -13  -1 85.5884 30.5692   2
   9  13   1 -15.894 24.8308   2
  -6  14   1 1.63908 32.7563   3
  -6  14   1 9.04644 31.0323   2
  -6  14   1 -13.367 19.5134   4
  -6  14   1 -13.303 26.2481   2
  -5  14   1 68.4363 28.5091   2
  -5  14   1 55.8815 21.2344   4
  -5  14   1 19.5408 30.4209   3
  -5  14   1 26.4399 16.0167   4
  -5  14   1 24.3326 23.5097   2
  -4  14   1 9.49972 23.0345   2
  -4  14   1 16.3930 15.2263   4
  -4  14   1 48.8957 29.7996   3
  -4  14   1 -33.899 25.3606   3
  -4  14   1 7.84819 22.3688   2
  -4  14   1 11.6082 19.6693   4
  -3  14   1 -22.094 22.3221   3
  -3  14   1 5.51696 20.2238   2
  -3  14   1 40.9907 21.3606   2
  -3  14   1 -32.831 21.0411   4
  -3  14   1 21.1621 28.7844   3
  -3  14   1 12.7585 14.4077   4
  -2  14   1 26.9808 19.0470   4
  -2  14   1 11.9622 14.7446   4
  -2  14   1 29.8460 21.2880   3
  -2  14   1 -9.4483 18.0828   2
  -2  14   1 23.4708 18.3326   2
  -2  14   1 7.31886 23.6015   3
  -1  14   1 34.6798 15.4960   4
  -1  14   1 64.9710 23.9762   3
  -1  14   1 70.5807 18.5538   2
  -1  14   1 67.3536 20.0704   2
  -1  14   1 76.5100 20.7469   4
  -1  14   1 73.2411 21.3453   3
   0  14   1 0.07944 18.5027   2
   0  14   1 26.0516 21.0547   3
   0  14   1 16.8507 17.4087   3
   0  14   1 1.31530 14.2783   4
   0  14   1 30.7698 16.2380   2
   1  14   1 29.3908 15.3557   2
   1  14   1 7.55295 17.3397   3
   1  14   1 -0.4112 18.7528   2
   1  14   1 10.8396 15.3666   4
   1  14   1 37.4594 19.6811   3
   2  14   1 34.5760 16.8309   2
   2  14   1 48.8703 16.3213   3
   2  14   1 23.5335 17.9867   3
   2  14   1 25.5889 16.2356   4
   3  14   1 291.393 19.7962   5
   3  14   1 352.736 27.0418   2
   3  14   1 313.076 24.4362   3
   3  14   1 332.099 28.6432   3
   3  14   1 285.003 22.4268   5
   3  14   1 305.233 30.0938   4
   4  14   1 102.576 19.3981   4
   4  14   1 201.432 20.5877   2
   4  14   1 205.132 23.1929   3
   4  14   1 142.520 17.8936   5
   4  14   1 164.771 18.4060   5
   4  14   1 138.678 14.2871   3
  -5 -14  -1 242.110 29.1265   5
  -5 -14  -1 235.480 22.8492   5
  -5 -14  -1 240.928 47.2883   2
   5  14   1 226.335 27.7404   5
   5  14   1 243.748 22.6102   2
  -6 -14  -1 460.708 42.8478   2
  -6 -14  -1 447.721 37.0759   5
  -6 -14  -1 380.274 28.1337   5
   6  14   1 423.069 34.8176   5
   6  14   1 461.004 33.4994   2
  -7 -14  -1 312.383 30.7576   5
  -7 -14  -1 241.451 24.9112   5
  -7 -14  -1 369.873 34.1739   2
   7  14   1 328.491 37.7878   5
   7  14   1 302.091 28.1439   2
  -8 -14  -1 55.4289 31.4284   2
  -8 -14  -1 77.1873 24.1512   5
   8  14   1 21.1353 27.6428   2
  -5  15   1 110.701 26.3859   4
  -5  15   1 34.3534 29.0502   2
  -5  15   1 172.959 35.8933   2
  -5  15   1 50.0742 34.8780   3
  -4  15   1 3.35657 26.5490   2
  -4  15   1 12.8006 29.7535   2
  -4  15   1 -0.8868 23.8870   4
  -4  15   1 -20.264 30.2253   3
  -4  15   1 -46.847 18.6142   4
  -3  15   1 48.0924 18.9594   4
  -3  15   1 33.4768 24.1721   4
  -3  15   1 71.5892 31.5375   3
  -3  15   1 86.8240 28.7719   3
  -3  15   1 60.5955 27.7449   2
  -3  15   1 77.1349 26.1087   2
  -2  15   1 74.4804 23.7968   2
  -2  15   1 51.6317 31.6186   3
  -2  15   1 107.726 24.9000   2
  -2  15   1 59.9076 24.0451   4
  -2  15   1 45.5300 26.8266   3
  -2  15   1 57.8820 18.6222   4
  -1  15   1 -12.282 22.2033   2
  -1  15   1 -0.5720 20.5194   2
  -1  15   1 25.6089 27.2903   3
  -1  15   1 5.99112 22.1047   4
  -1  15   1 9.57746 17.5613   4
  -1  15   1 -40.911 22.9238   3
   0  15   1 13.1637 17.9738   4
   0  15   1 6.77597 23.8754   3
   0  15   1 18.2907 19.3231   2
   0  15   1 3.60463 24.0311   3
   0  15   1 -1.4143 23.3995   4
   0  15   1 19.5645 39.2900   2
   1  15   1 -8.8149 17.4492   2
   1  15   1 41.1326 22.4786   2
   1  15   1 12.5059 19.3283   3
   1  15   1 7.44817 23.1672   3
   1  15   1 -0.3124 18.3716   4
   2  15   1 78.7060 31.9017   3
   2  15   1 79.0193 19.2302   4
   2  15   1 85.9766 19.7804   3
   2  15   1 65.2356 19.2327   2
   3  15   1 18.2744 18.9442   3
   3  15   1 -9.4103 18.2926   2
   3  15   1 -36.215 15.5803   3
   4  15   1 203.516 19.6745   5
   4  15   1 122.553 15.7218   3
   4  15   1 135.540 22.5602   2
  -5 -15  -1 26.6625 14.7952   5
   5  15   1 24.2262 22.2404   2
   5  15   1 24.4655 19.7270   5
  -6 -15  -1 66.8366 24.3985   5
  -6 -15  -1 80.5646 30.5726   2
  -6 -15  -1 80.6037 19.3530   5
   6  15   1 70.6783 24.4948   2
  -7 -15  -1 -12.084 31.9753   2
   7  15   1 -26.025 26.9951   2
  -3  16   1 54.1623 24.0688   4
  -3  16   1 114.867 31.5554   2
  -3  16   1 77.9305 34.9217   3
  -3  16   1 137.790 34.1274   2
  -3  16   1 130.933 31.5804   4
  -2  16   1 120.103 30.2702   2
  -2  16   1 57.5051 29.4496   4
  -2  16   1 64.5247 31.0086   3
  -2  16   1 101.073 30.1099   2
  -2  16   1 99.6336 24.6035   4
  -2  16   1 122.116 37.9909   3
  -1  16   1 96.9325 26.9671   2
  -1  16   1 73.8944 35.6263   3
  -1  16   1 30.9775 29.2995   4
  -1  16   1 44.2993 26.6950   2
  -1  16   1 59.9961 22.8866   4
  -1  16   1 64.8364 29.3938   3
   0  16   1 -0.1641 20.1478   4
   0  16   1 -4.2363 23.1441   2
   0  16   1 -31.123 29.8236   3
   0  16   1 19.0944 27.0549   4
   0  16   1 -2.3645 24.2408   3
   0  16   1 -16.952 25.6898   2
   1  16   1 47.2863 26.0096   2
   1  16   1 64.9060 23.8867   2
   1  16   1 46.1453 29.2307   3
   2  16   1 8.55950 25.4449   3
   2  16   1 36.9702 26.2928   2
   2  16   1 15.2608 22.0825   3
   2  16   1 23.4600 23.2786   2
   3  16   1 50.4281 23.4070   2
   3  16   1 -10.131 18.4750   3
   4  16   1 4.52268 24.2885   2
   5  16   1 28.9668 18.6512   5
   5  16   1 -14.259 26.7612   2
   4  16  -2 46.7218 28.2743   2
   3  16  -2 28.9712 28.3569   2
   3  16  -2 46.5669 32.5993   4
   2  16  -2 -5.8212 20.9385   3
   2  16  -2 36.8043 32.0504   4
   2  16  -2 39.1158 28.0668   2
   1  16  -2 16.3903 38.9719   3
   1  16  -2 -11.111 30.2041   2
   1  16  -2 -5.9396 26.9663   2
   1  16  -2 -19.735 30.2422   4
   1  16  -2 58.1344 27.8750   3
   0  16  -2 12.1321 28.0644   2
   0  16  -2 43.8611 30.8269   2
   0  16  -2 -1.2491 26.4164   3
   0  16  -2 38.4498 35.1935   3
   0  16  -2 0.27996 31.2207   4
  -1  16  -2 39.0888 32.3421   4
  -1  16  -2 5.38861 29.0271   2
  -1  16  -2 18.9093 36.9916   3
  -1  16  -2 40.8970 31.5366   2
  -1  16  -2 -21.609 28.4097   3
  -2  16  -2 42.1332 34.6456   2
  -2  16  -2 -3.2772 30.8611   4
  -2  16  -2 -57.123 30.6912   2
  -2  16  -2 59.0517 42.2737   3
  -2  16  -2 -24.055 30.8856   3
  -6 -15   2 65.3246 23.7521   5
  -6 -15   2 -0.5345 33.3391   2
  -6 -15   2 34.1856 19.1291   5
   5  15  -2 159.950 29.2545   2
   5  15  -2 142.130 22.8110   5
   4  15  -2 41.2866 24.7920   2
   4  15  -2 37.8147 17.9530   5
   3  15  -2 40.9283 22.9867   2
   3  15  -2 38.1003 17.9014   3
   2  15  -2 111.992 28.4227   4
   2  15  -2 98.5160 21.8924   3
   2  15  -2 90.6816 24.5513   2
   1  15  -2 38.2259 20.9700   3
   1  15  -2 35.2453 26.9912   4
   1  15  -2 62.2722 26.0603   3
   1  15  -2 2.11845 21.6474   2
   0  15  -2 25.1773 23.7495   2
   0  15  -2 44.4360 18.2201   4
   0  15  -2 -14.786 24.6372   4
   0  15  -2 3.68324 25.8020   2
   0  15  -2 38.5248 27.7628   3
   0  15  -2 0.16928 21.8324   3
  -1  15  -2 29.3763 27.7272   2
  -1  15  -2 75.0899 30.2649   3
  -1  15  -2 20.3600 18.4763   4
  -1  15  -2 37.3901 25.2348   3
  -1  15  -2 64.2388 27.0312   4
  -1  15  -2 46.5830 24.7549   2
  -2  15  -2 19.7622 33.1937   3
  -2  15  -2 12.2940 26.6738   2
  -2  15  -2 32.5145 27.4203   2
  -2  15  -2 49.2647 27.1729   4
  -2  15  -2 40.6850 21.6263   4
  -2  15  -2 37.8027 28.0044   3
  -3  15  -2 58.5080 30.1498   3
  -3  15  -2 38.8669 29.6577   2
  -3  15  -2 20.3034 27.3038   4
  -3  15  -2 0.74198 26.9876   2
  -3  15  -2 57.7197 36.9661   3
  -3  15  -2 37.7289 22.4734   4
  -4  15  -2 39.2430 31.8580   3
  -4  15  -2 -26.082 27.1236   4
  -4  15  -2 12.1849 28.1701   2
  -4  15  -2 9.84856 22.5488   4
   7  14  -2 52.3538 35.8456   2
  -7 -14   2 -1.1706 30.3435   2
  -7 -14   2 6.16189 21.3143   5
  -7 -14   2 -23.486 21.6057   5
   6  14  -2 29.8027 25.2591   2
   6  14  -2 108.897 22.9297   5
  -6 -14   2 110.091 24.2041   5
  -6 -14   2 94.3725 19.9188   5
  -6 -14   2 108.906 31.9866   2
   5  14  -2 34.5916 18.7183   5
   5  14  -2 27.7111 22.9431   2
  -5 -14   2 27.0709 18.4066   5
  -5 -14   2 14.5149 15.4581   5
  -5 -14   2 29.4932 28.2934   2
   4  14  -2 288.336 26.7156   2
   4  14  -2 241.362 25.7557   5
   3  14  -2 71.5517 18.9466   3
   3  14  -2 6.79556 14.0208   3
   3  14  -2 9.42763 18.8751   2
   2  14  -2 39.6343 19.3651   3
   2  14  -2 -11.387 15.6436   3
   2  14  -2 44.9440 17.8661   4
   2  14  -2 18.5316 17.8169   2
   1  14  -2 39.8114 18.7004   2
   1  14  -2 0.19328 22.5939   4
   1  14  -2 14.9013 21.7405   3
   1  14  -2 -8.0224 15.8790   4
   1  14  -2 -19.461 16.6288   3
   0  14  -2 121.053 19.6495   4
   0  14  -2 171.164 22.8882   2
   0  14  -2 196.932 27.2720   3
   0  14  -2 172.556 25.7926   2
   0  14  -2 170.530 23.8093   3
   0  14  -2 182.934 27.0772   4
  -1  14  -2 17.1988 20.5668   2
  -1  14  -2 17.9334 16.8643   4
  -1  14  -2 -22.108 21.6315   2
  -1  14  -2 -18.914 21.7738   4
  -1  14  -2 39.0787 24.2928   3
  -1  14  -2 6.37278 20.6589   3
  -2  14  -2 83.2688 23.5530   4
  -2  14  -2 128.333 24.0860   2
  -2  14  -2 109.544 25.1447   2
  -2  14  -2 61.8232 25.5719   3
  -2  14  -2 76.9896 17.8882   4
  -2  14  -2 99.4433 28.4850   3
  -3  14  -2 -5.0118 30.9956   3
  -3  14  -2 -19.540 15.1612   4
  -3  14  -2 16.5253 22.5379   4
  -3  14  -2 1.92088 25.2985   3
  -3  14  -2 -31.820 22.9232   2
  -3  14  -2 -8.4567 24.7674   2
  -4  14  -2 26.5779 33.5575   3
  -4  14  -2 9.78493 17.5535   4
  -4  14  -2 -5.7038 21.3032   4
  -4  14  -2 23.3049 28.6128   3
  -4  14  -2 9.14467 28.3674   2
  -4  14  -2 27.6179 25.1605   2
  -5  14  -2 83.6318 33.2690   3
  -5  14  -2 87.7969 29.0046   2
  -5  14  -2 98.1066 25.2173   4
  -5  14  -2 115.367 21.2688   4
  -5  14  -2 89.3417 29.5267   2
  -6  14  -2 36.3885 34.5617   4
  -6  14  -2 64.4333 31.1600   2
  -6  14  -2 45.6376 36.9039   3
  -9 -13   2 72.5033 33.7505   2
  -8 -13   2 43.7568 23.9932   5
  -8 -13   2 42.2887 30.0596   2
   7  13  -2 249.916 28.5223   5
   7  13  -2 198.282 26.8451   2
  -7 -13   2 261.661 27.9253   5
  -7 -13   2 231.522 25.0893   5
  -7 -13   2 188.788 31.1048   2
   6  13  -2 -20.929 19.0357   5
   6  13  -2 7.10106 19.8492   2
  -6 -13   2 33.1182 26.1816   2
  -6 -13   2 21.7562 16.7941   5
  -6 -13   2 34.6350 20.5782   5
   5  13  -2 24.2002 16.8577   5
   5  13  -2 30.3025 19.0993   2
  -5 -13   2 55.0555 24.5799   2
  -5 -13   2 22.5887 14.2541   5
  -5 -13   2 51.8241 17.4477   5
   4  13  -2 175.913 15.5009   3
   4  13  -2 184.962 21.4372   4
   4  13  -2 193.636 18.4956   5
   4  13  -2 194.530 21.4676   2
  -4 -13   2 195.234 21.7395   5
  -4 -13   2 208.574 27.5081   2
  -4 -13   2 211.135 19.8180   5
   3  13  -2 62.5029 12.7778   5
   3  13  -2 91.3549 16.1723   3
   3  13  -2 61.6996 17.9034   4
   3  13  -2 44.5639 12.9060   3
   3  13  -2 35.8195 12.2148   5
   3  13  -2 94.5397 18.2177   2
   2  13  -2 -3.9310 15.4551   2
   2  13  -2 -14.676 12.8900   3
   2  13  -2 17.0800 15.7646   3
   2  13  -2 -21.309 14.3727   4
   1  13  -2 379.684 35.5615   4
   1  13  -2 340.615 28.7323   2
   1  13  -2 360.442 28.9563   3
   1  13  -2 321.374 26.8827   4
   0  13  -2 113.487 21.9366   4
   0  13  -2 91.0041 16.0973   4
   0  13  -2 103.427 20.9149   3
   0  13  -2 88.8132 21.5172   3
   0  13  -2 131.577 20.1218   2
  -1  13  -2 162.029 23.4248   3
  -1  13  -2 176.091 22.5753   4
  -1  13  -2 166.113 18.0114   4
  -1  13  -2 158.853 21.7782   2
  -1  13  -2 136.832 25.0663   3
  -1  13  -2 124.457 24.6515   2
  -2  13  -2 24.2203 18.6515   2
  -2  13  -2 26.4232 14.3459   4
  -2  13  -2 1.82567 19.3658   2
  -2  13  -2 23.4584 19.1001   3
  -2  13  -2 31.4911 18.0248   4
  -2  13  -2 -18.594 22.3472   3
  -3  13  -2 212.344 22.9430   4
  -3  13  -2 243.499 26.9563   2
  -3  13  -2 206.644 31.9373   3
  -3  13  -2 213.020 28.4441   3
  -3  13  -2 227.813 26.2384   4
  -3  13  -2 221.489 25.7874   2
  -4  13  -2 8.31439 29.4557   3
  -4  13  -2 25.1094 23.0393   2
  -4  13  -2 -15.119 22.6538   3
  -4  13  -2 23.4653 22.7355   2
  -4  13  -2 1.97094 12.3744   4
  -4  13  -2 16.6080 21.6238   4
  -5  13  -2 -6.8003 20.0247   4
  -5  13  -2 28.1301 15.1847   4
  -5  13  -2 14.4115 23.1809   2
  -5  13  -2 5.26418 25.3196   3
  -5  13  -2 34.5828 26.4157   2
  -6  13  -2 59.2995 17.1715   4
  -6  13  -2 90.1617 22.6447   4
  -6  13  -2 76.6893 30.7794   3
  -6  13  -2 102.057 28.9981   2
  -6  13  -2 94.8018 27.7967   2
  -7  13  -2 28.4640 21.8113   4
  -7  13  -2 62.4253 28.3656   2
  -7  13  -2 -9.6271 32.6242   3
  -9 -12   2 13.3673 28.7975   2
  -9 -12   2 -3.9159 23.5014   5
   8  12  -2 142.300 28.8573   5
   8  12  -2 165.028 27.0246   2
  -8 -12   2 133.011 24.1725   5
  -8 -12   2 178.370 25.5482   5
  -8 -12   2 179.522 30.0926   2
   7  12  -2 12.7423 21.9489   5
   7  12  -2 31.0471 19.3094   2
  -7 -12   2 53.3871 24.5468   2
  -7 -12   2 22.6117 17.1942   5
  -7 -12   2 43.1647 21.1033   5
   6  12  -2 24.9496 18.4101   2
   6  12  -2 44.9940 18.8948   4
   6  12  -2 48.2796 19.4266   5
   6  12  -2 53.4562 18.3711   5
  -6 -12   2 64.2015 18.5264   5
  -6 -12   2 38.6451 16.1925   5
  -6 -12   2 58.7056 22.8913   2
   5  12  -2 10.2450 15.5801   5
   5  12  -2 11.8195 14.7169   2
   5  12  -2 -0.4619 14.5793   5
   5  12  -2 -13.650 15.1619   4
  -5 -12   2 0.18968 19.6492   2
  -5 -12   2 -10.780 14.5127   5
  -5 -12   2 -1.8836 13.0090   5
   4  12  -2 105.968 17.4456   2
   4  12  -2 101.064 14.4957   5
   4  12  -2 85.1038 16.5529   4
   4  12  -2 119.023 15.3344   5
  -4 -12   2 118.823 13.6555   5
  -4 -12   2 100.410 14.9782   5
  -4 -12   2 108.121 22.6290   2
   3  12  -2 7.72528 10.0914   5
   3  12  -2 7.71703 10.3477   3
   3  12  -2 9.19486 13.8175   4
   3  12  -2 11.6037 14.1529   2
   3  12  -2 24.1549 12.6392   3
  -3 -12   2 29.0583 18.8181   2
   2  12  -2 27.5495 14.3103   2
   2  12  -2 -4.7482 12.8785   4
   2  12  -2 35.5974 12.2778   3
   2  12  -2 11.0710 13.8930   3
   1  12  -2 35.0255 15.4527   3
   1  12  -2 34.6514 14.2337   2
   1  12  -2 29.7005 14.9738   3
   1  12  -2 34.3780 13.5353   4
   0  12  -2 460.625 32.8102   3
   0  12  -2 504.348 28.6723   2
   0  12  -2 527.268 25.5922   4
   0  12  -2 465.244 32.3122   4
   0  12  -2 484.564 30.4126   3
  -1  12  -2 139.930 22.1861   3
  -1  12  -2 146.150 20.8424   3
  -1  12  -2 128.859 20.5056   2
  -1  12  -2 109.388 14.7639   4
  -1  12  -2 156.740 19.0857   2
  -1  12  -2 127.098 19.6359   4
  -2  12  -2 108.317 21.2510   3
  -2  12  -2 98.7088 14.3488   4
  -2  12  -2 102.806 22.4851   3
  -2  12  -2 115.316 19.2313   2
  -2  12  -2 102.754 19.8740   2
  -2  12  -2 99.4068 18.3071   4
  -3  12  -2 138.763 24.5245   2
  -3  12  -2 129.985 15.0180   4
  -3  12  -2 123.528 23.1473   3
  -3  12  -2 163.349 20.5681   4
  -3  12  -2 131.915 25.5064   3
  -3  12  -2 144.103 21.7402   2
  -4  12  -2 289.272 32.8094   2
  -4  12  -2 339.689 39.6025   3
  -4  12  -2 343.927 22.9034   4
  -4  12  -2 290.075 24.2399   4
  -4  12  -2 289.917 27.3581   2
  -4  12  -2 367.685 43.1810   3
  -5  12  -2 60.0303 21.9180   2
  -5  12  -2 42.4773 17.6102   4
  -5  12  -2 64.0008 29.8575   3
  -5  12  -2 37.6632 13.3550   4
  -5  12  -2 24.1217 22.7374   2
  -5  12  -2 33.3633 24.0679   3
  -6  12  -2 468.569 26.0553   4
  -6  12  -2 520.668 40.1864   2
  -6  12  -2 502.921 32.9880   4
  -6  12  -2 431.817 48.5610   3
  -7  12  -2 60.9639 19.1473   4
  -7  12  -2 80.2648 21.0383   4
  -7  12  -2 82.1791 28.9594   3
  -7  12  -2 34.1809 23.8676   2
  -8  12  -2 517.334 59.5640   3
  -8  12  -2 494.986 47.7981   2
  -8  12  -2 413.033 31.8601   4
 -10 -11   2 31.5146 29.5971   2
 -10 -11   2 19.8399 27.5320   5
   9  11  -2 77.1495 23.4291   2
   9  11  -2 97.0057 28.8292   5
  -9 -11   2 112.877 22.9529   5
  -9 -11   2 70.6335 27.8393   2
  -9 -11   2 85.7919 25.1290   5
   8  11  -2 14.7957 19.5993   2
   8  11  -2 25.3072 22.4966   5
  -8 -11   2 26.1404 22.2540   5
  -8 -11   2 -14.356 23.7491   2
  -8 -11   2 -21.087 17.9950   5
   7  11  -2 4.76540 16.3281   5
   7  11  -2 16.8855 17.2460   4
   7  11  -2 44.8022 20.3646   5
   7  11  -2 -3.9283 15.9748   2
  -7 -11   2 28.8821 21.4228   2
  -7 -11   2 51.5101 18.4546   5
  -7 -11   2 15.6371 15.5706   5
   6  11  -2 48.3321 14.8966   5
   6  11  -2 27.6190 16.5216   5
   6  11  -2 28.9419 15.0991   4
   6  11  -2 28.0987 15.8246   2
  -6 -11   2 43.1416 14.6217   5
  -6 -11   2 92.8820 20.2886   2
  -6 -11   2 13.3433 16.1532   5
   5  11  -2 10.6676 13.7803   4
   5  11  -2 32.2851 12.3228   5
   5  11  -2 5.62016 13.1854   5
   5  11  -2 16.2468 14.2433   2
  -5 -11   2 25.1242 12.7951   5
  -5 -11   2 12.7758 18.0088   2
  -5 -11   2 38.0658 14.4239   5
   4  11  -2 41.4999 11.9210   5
   4  11  -2 44.3076 13.4551   4
   4  11  -2 59.8991 14.8202   2
   4  11  -2 60.4853 11.7605   5
  -4 -11   2 44.9041 11.4243   5
  -4 -11   2 24.0101 16.4232   2
  -4 -11   2 47.1237 12.8025   5
   3  11  -2 129.042 15.6379   2
   3  11  -2 128.221 12.5371   5
   3  11  -2 118.092 15.4705   4
   3  11  -2 147.399 15.7670   5
   3  11  -2 137.457 18.3279   3
   3  11  -2 111.236 11.9682   3
  -3 -11   2 106.994 18.8068   2
  -3 -11   2 138.397 16.6319   5
  -3 -11   2 110.980 11.1713   5
   2  11  -2 -2.1916 11.5650   2
   2  11  -2 0.10302 10.7926   4
   2  11  -2 -19.199 9.81924   3
   2  11  -2 15.5260 11.8487   3
   2  11  -2 8.02152 7.89597   5
   1  11  -2 4.62475 12.8081   3
   1  11  -2 15.0543 12.1349   2
   1  11  -2 -4.2161 11.5553   3
   1  11  -2 -0.6773 9.74507   4
   0  11  -2 -9.1359 11.8305   2
   0  11  -2 5.49809 13.8008   3
   0  11  -2 -6.9634 13.2538   4
   0  11  -2 19.4108 14.4677   3
   0  11  -2 12.7045 9.97924   4
  -1  11  -2 33.1583 14.2582   2
  -1  11  -2 9.05981 14.1000   2
  -1  11  -2 10.7706 14.5080   3
  -1  11  -2 23.2974 16.0776   3
  -1  11  -2 11.9112 13.8863   4
  -1  11  -2 20.2751 10.2953   4
  -2  11  -2 26.8506 15.0302   2
  -2  11  -2 1.35906 14.3947   2
  -2  11  -2 1.69234 16.9111   3
  -2  11  -2 5.69059 15.3187   3
  -2  11  -2 -10.034 12.5276   4
  -2  11  -2 10.6932 10.2110   4
  -3  11  -2 60.3185 17.3611   2
  -3  11  -2 81.2053 20.1569   3
  -3  11  -2 76.4340 13.1258   4
  -3  11  -2 84.7670 15.8077   4
  -3  11  -2 70.9302 17.2414   2
  -3  11  -2 73.4307 20.2836   3
  -4  11  -2 20.3767 19.5315   3
  -4  11  -2 22.8821 11.0272   4
  -4  11  -2 44.2124 17.6550   2
  -4  11  -2 18.7173 30.4478   2
  -4  11  -2 39.8805 22.6534   3
  -4  11  -2 25.6163 14.9620   4
  -5  11  -2 223.201 21.0637   4
  -5  11  -2 288.155 39.0250   3
  -5  11  -2 193.942 29.0259   3
  -5  11  -2 217.068 24.0258   2
  -5  11  -2 264.475 25.8642   4
  -6  11  -2 145.234 34.0482   3
  -6  11  -2 121.667 18.5354   4
  -6  11  -2 147.830 16.0574   4
  -6  11  -2 168.114 30.4274   3
  -6  11  -2 150.517 23.6279   2
  -7  11  -2 465.626 30.0197   4
  -7  11  -2 436.482 23.2658   4
  -7  11  -2 461.177 23.6026   5
  -7  11  -2 372.839 47.4585   3
  -7  11  -2 413.730 24.0397   5
  -7  11  -2 347.911 38.9537   2
  -8  11  -2 244.679 21.7746   4
  -8  11  -2 216.954 29.5162   2
  -8  11  -2 255.027 27.9669   5
  -8  11  -2 247.470 35.2903   3
  -8  11  -2 299.754 28.8765   4
  -9  11  -2 61.2681 29.7144   2
  -9  11  -2 120.155 21.0188   5
  -9  11  -2 144.310 39.8187   3
 -11 -10   2 81.7737 28.5541   5
 -11 -10   2 45.0135 31.9975   2
  10  10  -2 359.419 35.0889   5
 -10 -10   2 432.410 45.6776   2
 -10 -10   2 349.617 39.9114   5
   9  10  -2 35.6669 21.4947   2
   9  10  -2 7.66717 19.9098   4
   9  10  -2 46.0109 25.4785   5
   9  10  -2 16.5050 26.4498   5
  -9 -10   2 -3.5774 20.6860   5
  -9 -10   2 36.9664 23.4137   2
  -9 -10   2 5.42982 32.1612   5
   8  10  -2 126.227 23.2984   5
   8  10  -2 167.540 25.6252   5
   8  10  -2 153.092 21.3028   4
   8  10  -2 156.905 22.5197   2
  -8 -10   2 140.783 24.4368   2
  -8 -10   2 176.122 21.8454   5
   7  10  -2 178.358 20.4126   5
   7  10  -2 161.520 18.6536   2
   7  10  -2 169.663 19.3215   4
   7  10  -2 155.861 21.1990   5
  -7 -10   2 184.530 19.9096   5
  -7 -10   2 182.384 23.0338   2
  -7 -10   2 156.511 21.1012   5
   6  10  -2 82.4766 15.7905   2
   6  10  -2 100.336 16.8969   5
   6  10  -2 116.105 18.0057   5
   6  10  -2 106.851 15.5268   4
  -6 -10   2 80.6860 18.6442   5
  -6 -10   2 111.280 19.3818   2
  -6 -10   2 82.5004 14.9647   5
   5  10  -2 7.07936 10.3829   5
   5  10  -2 5.18948 12.4947   2
   5  10  -2 21.9509 12.1536   5
   5  10  -2 10.9511 11.5794   4
  -5 -10   2 21.6228 15.4265   2
  -5 -10   2 -7.2003 12.3418   5
  -5 -10   2 5.14754 11.1786   5
   4  10  -2 1638.22 41.7343   2
   4  10  -2 1613.46 39.0638   5
   4  10  -2 1558.85 41.6437   4
   4  10  -2 1557.36 39.0953   5
  -4 -10   2 1599.53 39.9272   5
  -4 -10   2 1691.52 45.5938   2
   3  10  -2 272.109 20.5240   2
   3  10  -2 287.940 15.8807   5
   3  10  -2 276.724 16.7163   5
   3  10  -2 309.708 18.3828   3
   3  10  -2 313.056 20.4390   4
   3  10  -2 292.443 15.9989   3
  -3 -10   2 280.123 15.2887   5
  -3 -10   2 304.737 25.1800   2
  -3 -10   2 293.566 17.2202   5
   2  10  -2 247.355 24.0248   2
   2  10  -2 263.123 19.4576   4
   2  10  -2 310.780 18.0849   3
   2  10  -2 282.496 14.2466   5
   2  10  -2 266.848 13.6809   5
   2  10  -2 272.015 19.8106   3
  -2 -10   2 277.007 23.8885   2
   1  10  -2 26.6431 11.4893   3
   1  10  -2 42.5614 11.2101   3
   1  10  -2 24.3561 9.39021   4
   0  10  -2 44.9218 13.6328   3
   0  10  -2 57.4991 11.1237   4
   0  10  -2 73.9624 14.4444   3
  -1  10  -2 8.81145 11.6345   4
  -1  10  -2 -10.974 11.1197   2
  -1  10  -2 -11.632 8.90554   4
  -1  10  -2 -5.5979 12.4160   2
  -1  10  -2 8.93934 12.8768   3
  -1  10  -2 7.60464 12.7140   3
  -2  10  -2 7.95261 13.4812   2
  -2  10  -2 12.9983 12.8459   2
  -2  10  -2 7.98889 12.0765   4
  -2  10  -2 16.7978 13.9214   3
  -2  10  -2 1.95091 13.6968   3
  -2  10  -2 6.33759 9.29713   4
  -3  10  -2 14.5761 13.7960   2
  -3  10  -2 22.7592 17.0181   3
  -3  10  -2 9.90746 15.0474   3
  -3  10  -2 -3.6632 9.69772   4
  -3  10  -2 36.8529 14.2714   2
  -3  10  -2 2.64550 12.2502   4
  -4  10  -2 173.703 16.9200   4
  -4  10  -2 168.156 16.4862   4
  -4  10  -2 183.093 25.8638   3
  -4  10  -2 167.506 26.7645   3
  -4  10  -2 175.400 20.0290   2
  -5  10  -2 36.7953 10.2260   4
  -5  10  -2 6.81743 18.3366   3
  -5  10  -2 3.32839 12.6331   4
  -5  10  -2 -19.035 18.4357   3
  -6  10  -2 74.4386 11.2348   5
  -6  10  -2 52.3586 24.9365   3
  -6  10  -2 21.5564 22.4857   3
  -6  10  -2 56.1424 11.2199   4
  -6  10  -2 75.3154 18.1470   2
  -6  10  -2 50.5428 14.3381   4
  -6  10  -2 68.6793 11.8830   5
  -7  10  -2 21.4829 13.6260   4
  -7  10  -2 41.3784 26.7219   3
  -7  10  -2 -0.3649 13.6694   5
  -7  10  -2 -11.281 25.9395   3
  -7  10  -2 3.62906 12.6276   5
  -7  10  -2 13.9569 10.8811   4
  -7  10  -2 25.2270 19.3768   2
  -8  10  -2 419.165 33.1784   5
  -8  10  -2 403.542 21.5671   4
  -8  10  -2 444.737 39.4150   2
  -8  10  -2 463.473 25.3009   4
  -8  10  -2 396.889 46.6870   3
   8 -10   2 421.376 23.1656   5
   8 -10   2 439.361 23.9185   5
  -9  10  -2 2.87125 11.2316   4
  -9  10  -2 -6.9237 20.4956   5
  -9  10  -2 -11.000 30.6548   3
  -9  10  -2 -3.8514 24.7164   2
  -9  10  -2 -0.7032 13.2368   4
   9 -10   2 22.2704 16.3543   5
   9 -10   2 17.6286 15.9826   5
 -10  10  -2 47.0050 30.4474   2
 -10  10  -2 34.4995 42.0910   3
  10 -10   2 41.6633 25.5445   5
  10 -10   2 27.2524 19.6792   5
 -11  -9   2 97.7954 33.2477   5
 -11  -9   2 58.7394 28.6972   2
  10   9  -2 15.3628 20.1485   2
  10   9  -2 45.6831 20.1983   4
  10   9  -2 57.8522 27.3365   5
  10   9  -2 91.4087 27.0830   5
 -10  -9   2 73.3124 25.0587   2
 -10  -9   2 72.8888 28.3469   5
 -10  -9   2 52.8520 24.9778   5
   9   9  -2 -6.9445 17.1614   4
   9   9  -2 12.8380 20.0666   5
   9   9  -2 -24.608 20.7193   5
   9   9  -2 -13.523 17.6632   2
  -9  -9   2 -9.6557 25.2128   5
  -9  -9   2 17.1872 19.9725   2
  -9  -9   2 11.9707 19.5372   5
   8   9  -2 -26.362 17.8777   5
   8   9  -2 5.07430 15.1218   4
   8   9  -2 -4.7629 15.0054   2
   8   9  -2 3.44123 15.3446   5
  -8  -9   2 -14.865 17.5784   2
  -8  -9   2 -13.421 16.4304   5
   7   9  -2 357.009 27.7054   5
   7   9  -2 318.715 25.5825   5
   7   9  -2 417.582 25.9380   2
   7   9  -2 372.801 25.3726   4
  -7  -9   2 378.966 26.3958   5
  -7  -9   2 353.519 34.4952   5
   6   9  -2 245.707 22.5550   2
   6   9  -2 272.692 21.4991   5
   6   9  -2 240.011 22.6787   5
   6   9  -2 241.442 21.1273   4
  -6  -9   2 211.922 21.0897   5
  -6  -9   2 265.623 25.4280   5
  -6  -9   2 250.997 25.6132   2
   5   9  -2 380.936 22.4696   5
   5   9  -2 421.477 23.1487   2
   5   9  -2 416.543 21.9094   4
   5   9  -2 412.836 20.8976   5
  -5  -9   2 364.167 20.2480   5
  -5  -9   2 381.184 24.0106   5
  -5  -9   2 425.599 25.5897   2
   4   9  -2 549.483 23.3581   2
   4   9  -2 495.740 20.3487   5
   4   9  -2 480.201 22.4191   4
   4   9  -2 525.799 22.1468   5
  -4  -9   2 525.783 22.8119   5
  -4  -9   2 547.556 26.6310   2
  -4  -9   2 476.744 19.7447   5
   3   9  -2 1894.67 39.9951   5
   3   9  -2 1870.33 38.1665   3
   3   9  -2 1893.13 40.3223   5
   3   9  -2 1902.98 39.7747   3
   3   9  -2 1843.60 42.9841   2
   3   9  -2 1837.59 43.4656   4
  -3  -9   2 1829.04 38.6576   5
  -3  -9   2 1828.91 40.1868   5
  -3  -9   2 1891.07 46.2786   2
   2   9  -2 248.223 15.8197   3
   2   9  -2 247.036 16.7966   4
   2   9  -2 233.436 16.8995   3
   2   9  -2 238.537 13.0349   5
   2   9  -2 258.149 12.7318   5
   2   9  -2 232.902 17.6462   2
  -2  -9   2 224.295 12.6701   5
  -2  -9   2 227.102 20.7754   2
  -2  -9   2 227.585 11.7182   5
   1   9  -2 614.981 22.6092   4
   1   9  -2 616.871 23.6839   2
   1   9  -2 628.459 24.7957   3
   1   9  -2 626.005 24.0834   3
   0   9  -2 2.51599 9.09627   2
   0   9  -2 1.47265 9.96423   3
   0   9  -2 1.01358 8.92339   4
   0   9  -2 -5.1282 9.43450   3
  -1   9  -2 1191.57 34.0687   2
  -1   9  -2 1170.76 30.8223   4
  -1   9  -2 1211.61 38.5007   3
  -1   9  -2 1228.92 34.7605   4
  -1   9  -2 1175.32 37.9422   3
  -2   9  -2 25.6712 11.3635   4
  -2   9  -2 27.5815 8.54767   4
  -2   9  -2 27.5889 13.6200   3
  -2   9  -2 47.8365 12.5145   2
  -2   9  -2 44.2063 14.4763   3
  -2   9  -2 30.7458 13.2855   2
  -3   9  -2 283.259 23.2249   2
  -3   9  -2 323.209 23.8334   2
  -3   9  -2 341.560 27.1535   3
  -3   9  -2 296.510 28.1469   3
  -3   9  -2 310.802 20.8142   4
  -3   9  -2 266.962 16.1943   4
  -4   9  -2 10.6272 10.5170   4
  -4   9  -2 28.3422 8.59120   4
  -4   9  -2 1.04475 15.3431   3
  -4   9  -2 7.47053 16.5603   3
  -4   9  -2 11.7929 13.5853   2
  -5   9  -2 945.203 29.7769   4
  -5   9  -2 864.749 25.5699   4
  -5   9  -2 903.240 22.6657   5
  -5   9  -2 893.369 43.8390   3
  -5   9  -2 954.366 36.5442   2
  -5   9  -2 908.281 23.9395   5
  -6   9  -2 10.7713 11.7584   4
  -6   9  -2 -3.2473 19.7901   3
  -6   9  -2 -4.2642 8.63544   5
  -6   9  -2 -6.2854 16.1261   2
  -6   9  -2 -0.0060 10.3331   5
  -6   9  -2 -3.2779 18.8234   3
  -6   9  -2 16.0621 9.24373   4
  -7   9  -2 6.86717 12.7040   5
  -7   9  -2 6.04181 11.3032   4
  -7   9  -2 12.1860 16.7084   2
  -7   9  -2 2.17191 11.0276   5
  -7   9  -2 7.59358 20.8383   3
  -7   9  -2 4.29279 9.51187   4
  -7   9  -2 -11.369 23.4482   3
   7  -9   2 -5.1673 10.9503   5
   7  -9   2 -0.8875 10.5005   5
  -8   9  -2 46.3654 20.1921   2
  -8   9  -2 32.5380 10.7328   4
  -8   9  -2 40.9787 25.2086   3
  -8   9  -2 38.7095 29.7718   3
  -8   9  -2 23.3714 12.0108   4
  -8   9  -2 30.4344 16.4953   5
  -8   9  -2 22.8076 14.3967   5
   8  -9   2 22.1416 13.1286   5
   8  -9   2 33.4549 13.9635   5
  -9   9  -2 152.255 19.8468   5
  -9   9  -2 189.443 20.4875   4
  -9   9  -2 165.313 28.2547   2
  -9   9  -2 162.270 34.4819   3
  -9   9  -2 174.697 17.4297   4
   9  -9   2 192.317 20.2693   5
   9  -9   2 149.433 19.0820   5
 -10   9  -2 99.2105 28.5106   2
 -10   9  -2 77.5930 21.6544   5
 -10   9  -2 90.3857 33.6133   3
  10  -9   2 48.7080 21.0037   5
  10  -9   2 102.137 21.7915   5
 -11   9  -2 13.3982 26.9420   2
 -12  -8   2 -23.040 29.1732   5
 -12  -8   2 39.0265 30.6727   2
  11   8  -2 76.5863 28.8775   5
  11   8  -2 113.093 28.9784   5
  11   8  -2 54.7549 21.6855   4
 -11  -8   2 120.560 26.5028   2
 -11  -8   2 68.5652 28.0129   5
  10   8  -2 51.3695 22.1069   2
  10   8  -2 27.2544 18.6360   4
  10   8  -2 4.98779 21.8805   5
  10   8  -2 19.1751 22.4224   5
 -10  -8   2 -8.7673 20.5356   2
 -10  -8   2 75.4796 29.5005   5
 -10  -8   2 8.78477 22.9620   5
   9   8  -2 10.9126 16.5842   2
   9   8  -2 42.1842 20.2293   5
   9   8  -2 62.0265 22.0424   5
   9   8  -2 8.14648 15.4331   4
  -9  -8   2 41.1816 17.5731   5
  -9  -8   2 31.2286 21.1645   5
  -9  -8   2 37.1421 18.9497   2
   8   8  -2 20.3726 17.6134   5
   8   8  -2 32.6023 14.2883   4
   8   8  -2 9.86018 16.1777   5
   8   8  -2 11.3560 14.1381   2
  -8  -8   2 34.1182 16.2191   2
  -8  -8   2 15.1474 15.8242   5
  -8  -8   2 12.6658 16.1943   5
   7   8  -2 112.536 15.9687   2
   7   8  -2 103.056 16.0219   5
   7   8  -2 134.863 15.3093   4
   7   8  -2 88.7413 17.0223   5
  -7  -8   2 126.073 17.4904   2
  -7  -8   2 26.9663 24.1050   5
   6   8  -2 170.085 18.3782   5
   6   8  -2 179.311 19.7558   2
   6   8  -2 160.233 16.0462   5
   6   8  -2 131.448 13.8689   4
  -6  -8   2 156.749 16.8013   2
  -6  -8   2 161.913 18.7483   5
  -6  -8   2 125.416 15.8232   5
   5   8  -2 27.1953 10.5436   5
   5   8  -2 34.3495 9.64141   5
   5   8  -2 34.5835 9.80223   4
   5   8  -2 25.4545 10.6916   2
  -5  -8   2 20.8490 9.71904   5
  -5  -8   2 39.0658 13.7435   5
  -5  -8   2 22.9168 12.1360   2
   4   8  -2 442.590 20.2671   2
   4   8  -2 440.594 20.0024   4
   4   8  -2 428.465 19.3942   5
   4   8  -2 429.044 18.4424   5
  -4  -8   2 399.319 17.9269   5
  -4  -8   2 432.158 19.9247   5
  -4  -8   2 512.106 23.3081   2
   3   8  -2 84.5393 9.97809   5
   3   8  -2 66.4460 9.18830   3
   3   8  -2 86.7350 10.6354   5
   3   8  -2 82.0926 8.80236   3
   3   8  -2 67.1626 9.38094   4
   3   8  -2 83.1217 10.7243   2
  -3  -8   2 81.0588 12.1530   2
  -3  -8   2 73.0451 9.01867   5
  -3  -8   2 75.5449 10.3115   5
   2   8  -2 48.3492 9.23113   2
   2   8  -2 41.8417 8.95466   3
   2   8  -2 42.9829 6.65073   5
   2   8  -2 51.7451 7.07460   5
   2   8  -2 44.9477 8.85163   4
   2   8  -2 44.2241 8.19143   3
  -2  -8   2 44.9355 6.92271   5
  -2  -8   2 29.1682 10.8744   2
  -2  -8   2 48.4745 7.59086   5
   1   8  -2 61.7302 7.24447   5
   1   8  -2 37.4708 9.13743   2
   1   8  -2 51.1566 9.12618   4
   1   8  -2 49.3875 5.96418   5
   1   8  -2 44.3164 9.77066   3
   0   8  -2 437.959 21.3153   3
   0   8  -2 426.522 19.3543   2
   0   8  -2 435.573 17.5397   4
  -1   8  -2 7.79251 8.31905   4
  -1   8  -2 15.1789 10.0439   3
  -1   8  -2 24.0782 9.54039   2
  -1   8  -2 13.7537 7.03862   4
  -2   8  -2 862.668 27.0389   4
  -2   8  -2 884.693 24.2503   4
  -2   8  -2 904.038 33.2512   3
  -2   8  -2 885.948 30.1918   2
  -2   8  -2 905.434 28.9131   2
  -3   8  -2 -6.3772 11.2223   3
  -3   8  -2 -3.7889 9.63912   2
  -3   8  -2 2.19309 8.57872   4
  -3   8  -2 -3.9520 6.64875   4
  -4   8  -2 1042.04 29.7727   4
  -4   8  -2 980.711 33.8047   2
  -4   8  -2 1031.87 23.3633   5
  -4   8  -2 1040.08 39.4240   3
  -4   8  -2 1041.61 41.0666   3
  -5   8  -2 15.6321 15.9151   3
  -5   8  -2 30.8058 9.16389   5
  -5   8  -2 26.2409 10.1601   4
  -5   8  -2 30.1227 7.67732   5
  -5   8  -2 10.0801 16.2292   3
  -5   8  -2 47.2550 14.2797   2
  -6   8  -2 190.830 15.2546   5
  -6   8  -2 206.509 20.7863   2
  -6   8  -2 162.313 22.4816   3
  -6   8  -2 177.178 23.0794   3
  -6   8  -2 200.598 16.6805   5
  -6   8  -2 195.929 17.7610   4
   6  -8   2 216.465 15.8260   5
  -7   8  -2 26.3973 19.5513   3
  -7   8  -2 0.64959 20.2048   3
  -7   8  -2 6.04155 9.90094   4
  -7   8  -2 -8.5541 11.2420   5
  -7   8  -2 -2.3109 14.4445   2
  -7   8  -2 9.18106 10.4438   5
   7  -8   2 1.98352 10.7489   5
   7  -8   2 16.0022 10.6512   5
  -8   8  -2 244.963 25.1602   5
  -8   8  -2 273.302 34.7872   3
  -8   8  -2 296.137 19.0404   4
  -8   8  -2 290.481 40.4152   3
  -8   8  -2 281.072 23.8462   5
  -8   8  -2 306.218 27.7209   2
   8  -8   2 326.360 23.0888   5
   8  -8   2 339.318 32.9986   2
  -9   8  -2 20.7200 21.3483   2
  -9   8  -2 -13.973 17.3816   5
  -9   8  -2 -48.594 21.7801   3
  -9   8  -2 -1.4866 10.4053   4
  -9   8  -2 22.4042 31.8596   3
  -9   8  -2 20.6256 16.0415   5
   9  -8   2 23.2629 15.1581   5
   9  -8   2 40.0679 27.8821   2
 -10   8  -2 36.8766 28.4350   3
 -10   8  -2 30.9984 24.3422   2
 -10   8  -2 71.4732 23.2870   5
  10  -8   2 41.9106 19.1543   5
 -11   8  -2 14.8164 27.1557   2
 -11   8  -2 16.0937 33.5417   3
  11  -8   2 -14.759 22.1635   5
  12   7  -2 79.0818 32.6245   5
  12   7  -2 76.5465 29.0237   5
  12   7  -2 75.9554 23.9134   4
 -12  -7   2 81.0554 26.8659   5
 -12  -7   2 133.340 30.4085   2
  11   7  -2 82.7327 21.7079   4
  11   7  -2 49.1878 27.3156   5
  11   7  -2 30.2700 22.9225   5
 -11  -7   2 58.5761 29.1776   5
 -11  -7   2 74.7750 27.9726   5
 -11  -7   2 54.0562 24.1416   2
  10   7  -2 14.4531 19.5228   2
  10   7  -2 15.0413 21.9723   5
  10   7  -2 37.9746 16.8441   4
  10   7  -2 15.4079 21.7798   5
 -10  -7   2 14.1164 17.0547   5
 -10  -7   2 14.0533 20.6891   5
 -10  -7   2 2.55023 19.7167   2
   9   7  -2 36.8383 16.4703   2
   9   7  -2 52.4697 20.0923   5
   9   7  -2 20.0060 16.4409   5
   9   7  -2 2.56031 13.8391   4
  -9  -7   2 36.4889 18.0226   2
  -9  -7   2 15.5375 18.5830   5
  -9  -7   2 26.2593 14.9500   5
   8   7  -2 323.105 23.2095   4
   8   7  -2 347.250 25.1924   2
   8   7  -2 352.259 27.7637   5
   8   7  -2 323.623 26.6101   5
  -8  -7   2 347.886 28.7096   5
  -8  -7   2 293.670 31.2117   2
  -8  -7   2 341.316 30.2945   5
   7   7  -2 329.493 21.3119   4
   7   7  -2 378.464 23.3606   2
   7   7  -2 354.414 31.0805   5
   7   7  -2 329.606 23.6431   5
  -7  -7   2 312.961 25.5119   5
  -7  -7   2 336.049 23.0515   5
  -7  -7   2 362.996 24.0767   2
   6   7  -2 57.9014 10.8792   4
   6   7  -2 43.5892 10.8044   5
   6   7  -2 39.1758 11.5891   5
   6   7  -2 22.9153 10.9202   2
  -6  -7   2 31.3960 12.3108   2
  -6  -7   2 26.1165 10.4356   5
   5   7  -2 33.9579 8.89300   4
   5   7  -2 33.4227 10.1946   5
   5   7  -2 31.2774 9.14616   5
   5   7  -2 29.4827 10.1629   2
  -5  -7   2 38.2909 10.9993   2
  -5  -7   2 23.6609 8.91310   5
  -5  -7   2 33.1441 10.3373   5
   4   7  -2 97.0042 15.4732   5
   4   7  -2 113.703 11.1845   2
   4   7  -2 96.1100 10.7984   5
  -4  -7   2 111.259 12.8613   2
  -4  -7   2 84.6011 9.91199   5
  -4  -7   2 102.051 11.7864   5
   3   7  -2 67.2925 9.22361   3
   3   7  -2 54.5066 6.18732   3
   3   7  -2 53.6860 8.23172   5
   3   7  -2 45.6372 7.81400   4
   3   7  -2 54.3517 7.90699   5
   3   7  -2 57.4655 9.16807   2
  -3  -7   2 46.2637 7.44851   5
  -3  -7   2 59.2969 10.5657   2
  -3  -7   2 56.6391 8.87850   5
   2   7  -2 153.181 12.4158   3
   2   7  -2 175.145 11.1746   5
   2   7  -2 169.715 9.67139   5
   2   7  -2 170.211 13.2530   2
   2   7  -2 146.503 12.1627   4
  -2  -7   2 160.610 15.1216   2
  -2  -7   2 174.412 10.4110   5
  -2  -7   2 170.610 10.0936   5
   1   7  -2 4.44819 4.04631   5
   1   7  -2 9.54059 5.92954   4
   1   7  -2 8.67468 4.54150   5
   1   7  -2 8.62212 7.10331   3
   1   7  -2 2.63364 6.73698   2
  -1  -7   2 3.13049 4.07573   5
  -1  -7   2 11.3132 8.19117   2
  -1  -7   2 3.02622 4.33799   5
   0   7  -2 171.069 15.2963   3
   0   7  -2 152.545 13.4336   2
   0   7  -2 163.874 11.8312   4
  -1   7  -2 1028.08 31.4071   3
  -1   7  -2 1065.97 28.1102   4
  -1   7  -2 1019.39 28.3691   2
  -1   7  -2 1079.57 26.0685   4
  -2   7  -2 40.6608 10.4820   2
  -2   7  -2 36.7311 8.83288   4
  -2   7  -2 26.3803 10.8428   3
  -3   7  -2 58.8284 11.8237   2
  -3   7  -2 57.6707 13.6134   3
  -3   7  -2 62.7456 9.84702   4
  -4   7  -2 0.56490 9.87880   2
  -4   7  -2 -1.5025 7.53134   4
  -4   7  -2 3.97664 7.55516   5
  -4   7  -2 2.22483 4.94033   5
  -4   7  -2 -5.2655 12.0204   3
  -5   7  -2 111.035 18.1565   3
  -5   7  -2 114.521 15.2438   2
  -5   7  -2 73.9966 16.1298   3
  -5   7  -2 112.663 11.4473   5
  -5   7  -2 112.764 12.5162   5
  -5   7  -2 115.558 11.9582   4
   5  -7   2 93.9809 10.8090   5
   5  -7   2 105.079 11.8306   5
  -6   7  -2 -9.6990 8.68253   5
  -6   7  -2 24.8768 16.1354   3
  -6   7  -2 -14.450 8.23148   4
  -6   7  -2 7.39583 8.35839   5
  -6   7  -2 -1.6214 16.0475   3
  -6   7  -2 3.33394 13.0204   2
   6  -7   2 -3.0062 8.03401   5
   6  -7   2 6.86244 14.5029   2
  -7   7  -2 22.7160 18.1648   3
  -7   7  -2 4.89820 17.3371   3
  -7   7  -2 1.21105 8.95683   4
  -7   7  -2 6.74461 9.83331   5
  -7   7  -2 21.3285 16.3077   2
   7  -7   2 7.47633 9.66999   5
   7  -7   2 -3.9536 17.6825   2
   7  -7   2 11.7542 10.1263   5
  -8   7  -2 27.3658 18.9428   3
  -8   7  -2 42.1862 16.0816   2
  -8   7  -2 44.6759 23.0880   3
  -8   7  -2 47.8203 13.8241   5
  -8   7  -2 34.9208 9.97759   4
  -8   7  -2 32.8637 14.0084   5
   8  -7   2 36.8824 13.4673   5
   8  -7   2 14.3831 19.4736   2
   8  -7   2 34.5736 12.2485   5
  -9   7  -2 814.893 23.0864   4
  -9   7  -2 818.220 34.8882   5
  -9   7  -2 709.246 55.3030   3
  -9   7  -2 782.763 49.3440   3
  -9   7  -2 767.345 36.2352   5
  -9   7  -2 797.721 40.6993   2
   9  -7   2 786.953 32.7104   5
   9  -7   2 823.617 33.6964   5
   9  -7   2 845.269 49.0175   2
 -10   7  -2 7.34405 22.2097   2
 -10   7  -2 16.5882 27.0129   3
 -10   7  -2 22.7741 19.4690   5
  10  -7   2 -30.417 33.6611   2
  10  -7   2 12.4111 16.6692   5
  10  -7   2 -12.863 15.5515   5
 -11   7  -2 1.57971 24.8017   2
 -11   7  -2 14.0903 31.1870   3
  11  -7   2 24.3047 21.4446   5
  11  -7   2 14.8971 20.0910   5
 -12   7  -2 30.1524 36.8625   3
  12   6  -2 34.6277 28.1716   5
  12   6  -2 2.63982 30.0268   5
  12   6  -2 21.9774 23.7860   4
 -12  -6   2 41.0271 26.4499   2
 -12  -6   2 -5.6039 30.1497   5
  11   6  -2 71.3702 26.4438   5
  11   6  -2 38.8955 17.7712   4
  11   6  -2 22.0188 24.0374   2
  11   6  -2 49.4336 25.4061   5
 -11  -6   2 79.4130 23.9506   2
 -11  -6   2 45.4060 26.9462   5
 -11  -6   2 88.8851 28.6689   5
  10   6  -2 307.776 26.8857   4
  10   6  -2 242.219 24.7256   2
  10   6  -2 284.703 29.1048   5
  10   6  -2 329.219 33.6820   5
 -10  -6   2 293.771 33.7607   2
 -10  -6   2 236.270 27.4280   5
 -10  -6   2 283.358 31.2714   5
   9   6  -2 11.4773 16.2086   2
   9   6  -2 20.4937 18.5047   5
   9   6  -2 -0.3456 12.0984   4
   9   6  -2 20.2677 17.5531   5
  -9  -6   2 -0.7598 15.3898   5
  -9  -6   2 15.7868 16.2267   2
  -9  -6   2 11.1178 17.2778   5
   8   6  -2 337.095 26.7507   5
   8   6  -2 288.805 20.8954   4
   8   6  -2 254.587 24.7177   5
   8   6  -2 241.508 22.9426   2
  -8  -6   2 248.460 22.2907   4
  -8  -6   2 270.346 23.9394   2
  -8  -6   2 279.250 24.1237   5
  -8  -6   2 312.284 27.5836   5
   7   6  -2 -2.0606 11.3032   5
   7   6  -2 8.67743 10.4877   2
   7   6  -2 -6.3725 9.07032   4
   7   6  -2 14.8994 11.7813   5
  -7  -6   2 -15.277 9.59533   4
  -7  -6   2 5.00230 11.2702   2
  -7  -6   2 -6.9301 11.3369   5
  -7  -6   2 -13.381 11.8720   5
   6   6  -2 433.133 20.8570   2
   6   6  -2 384.262 26.6050   5
   6   6  -2 357.263 24.3824   5
   6   6  -2 426.630 19.1877   4
  -6  -6   2 401.885 21.2446   5
  -6  -6   2 413.564 21.0324   4
  -6  -6   2 424.849 21.5359   2
  -6  -6   2 404.716 22.6473   5
   5   6  -2 751.620 23.1758   4
   5   6  -2 749.431 25.3445   5
   5   6  -2 720.315 24.0637   2
   5   6  -2 718.846 24.1202   5
  -5  -6   2 733.006 25.0375   2
  -5  -6   2 704.097 24.2440   5
   4   6  -2 137.377 13.2852   5
   4   6  -2 145.565 12.0444   5
   4   6  -2 162.675 13.4944   2
   4   6  -2 156.212 12.2135   4
  -4  -6   2 153.003 14.6057   5
  -4  -6   2 162.119 14.8116   2
  -4  -6   2 146.717 12.5262   5
   3   6  -2 9.46966 5.68553   4
   3   6  -2 9.90382 6.68415   2
   3   6  -2 8.97406 6.18724   5
   3   6  -2 9.74440 6.11525   5
  -3  -6   2 -0.7097 6.62349   5
  -3  -6   2 2.57103 7.59528   2
  -3  -6   2 3.42333 5.89020   5
   2   6  -2 216.475 12.9942   2
   2   6  -2 210.749 9.93847   5
   2   6  -2 212.959 11.9890   4
   2   6  -2 177.024 11.3648   3
   2   6  -2 210.205 10.8596   5
  -2  -6   2 212.594 11.0090   5
  -2  -6   2 219.269 10.4556   5
  -2  -6   2 205.016 14.1727   2
   1   6  -2 172.863 12.8497   3
   1   6  -2 176.017 7.90764   5
   1   6  -2 152.193 10.9324   4
   1   6  -2 182.301 12.6693   2
   1   6  -2 177.125 8.95694   5
  -1  -6   2 174.153 8.04081   5
  -1  -6   2 188.230 13.7367   2
  -1  -6   2 168.605 8.09477   5
   0   6  -2 9.66982 7.32740   3
   0   6  -2 19.0632 6.00958   4
   0   6  -2 1.41135 6.62894   2
  -1   6  -2 13.5221 7.59292   2
  -1   6  -2 -1.7017 7.24459   3
  -1   6  -2 6.87638 6.46522   4
  -2   6  -2 178.868 15.1651   2
  -2   6  -2 204.804 12.8940   4
  -2   6  -2 203.428 17.1386   3
  -3   6  -2 -0.3511 6.60249   4
  -3   6  -2 4.93333 3.87173   5
  -3   6  -2 15.3445 9.33569   3
  -3   6  -2 8.89348 4.58195   5
  -3   6  -2 11.6563 8.41920   2
  -4   6  -2 0.96204 10.5198   3
  -4   6  -2 -8.8967 8.36010   2
  -4   6  -2 -5.2816 5.56787   5
  -4   6  -2 0.09456 4.95358   5
  -4   6  -2 -9.4487 6.03365   4
   4  -6   2 -1.2163 5.45345   5
   4  -6   2 -1.9294 4.91363   5
  -5   6  -2 49.0096 8.61850   5
  -5   6  -2 38.4893 11.2585   2
  -5   6  -2 43.7111 14.7995   3
  -5   6  -2 41.0466 8.49824   4
  -5   6  -2 43.2424 7.58044   5
   5  -6   2 49.6209 7.76956   5
   5  -6   2 33.1669 15.3088   2
  -6   6  -2 -11.143 10.6016   2
  -6   6  -2 -14.541 7.03345   5
  -6   6  -2 3.69041 8.75894   5
  -6   6  -2 4.85328 13.1385   3
  -6   6  -2 -1.8765 7.40191   4
  -6   6  -2 -4.5838 13.8476   3
   6  -6   2 -10.659 12.7739   2
   6  -6   2 13.0119 8.44178   5
   6  -6   2 14.1870 8.32397   5
  -7   6  -2 93.0833 13.1187   5
  -7   6  -2 85.3951 15.7919   2
  -7   6  -2 85.4028 17.9170   3
  -7   6  -2 105.165 10.3067   4
  -7   6  -2 100.209 13.7020   5
  -7   6  -2 108.239 21.2400   3
   7  -6   2 112.601 13.4964   5
   7  -6   2 115.557 13.2376   5
   7  -6   2 115.879 18.2822   2
  -8   6  -2 541.581 19.1766   4
  -8   6  -2 556.745 38.2324   3
  -8   6  -2 585.952 31.8564   2
  -8   6  -2 485.221 38.4316   3
  -8   6  -2 542.625 25.9918   5
  -8   6  -2 496.602 26.2610   5
   8  -6   2 527.631 35.0090   2
   8  -6   2 516.359 25.2303   5
   8  -6   2 518.628 25.2715   5
  -9   6  -2 201.707 20.9398   5
  -9   6  -2 134.891 13.9095   4
  -9   6  -2 150.077 19.9040   5
  -9   6  -2 126.612 29.9263   3
  -9   6  -2 171.064 22.8044   2
  -9   6  -2 185.023 28.5732   3
   9  -6   2 155.176 18.4967   5
   9  -6   2 143.007 17.1665   5
   9  -6   2 167.874 26.1857   2
 -10   6  -2 175.879 30.0463   3
 -10   6  -2 111.167 32.2555   3
 -10   6  -2 159.161 24.7383   2
 -10   6  -2 139.096 14.4349   4
 -10   6  -2 151.755 24.2969   5
 -10   6  -2 182.890 27.3136   5
  10  -6   2 147.506 20.3866   5
  10  -6   2 156.203 21.7034   5
  10  -6   2 163.338 30.3575   2
 -11   6  -2 14.6761 24.8422   5
 -11   6  -2 36.2299 23.6025   2
 -11   6  -2 5.61364 25.6401   3
  11  -6   2 51.8781 20.5096   5
  11  -6   2 39.9981 21.8344   5
 -12   6  -2 12.5156 36.3288   3
 -12   6  -2 35.7398 28.2457   2
  12  -6   2 -18.813 25.2900   5
  13   5  -2 31.3419 27.0861   4
  13   5  -2 57.3403 39.0505   5
  13   5  -2 58.0741 56.6996   5
 -13  -5   2 0.82328 28.1310   2
 -13  -5   2 -10.797 38.3697   5
  12   5  -2 301.597 26.9789   4
  12   5  -2 238.104 28.3551   5
 -12  -5   2 310.871 32.7610   2
 -12  -5   2 303.444 47.5612   5
 -12  -5   2 219.153 19.7733   3
 -12  -5   2 428.733 44.7257   5
  11   5  -2 79.1710 18.0002   4
  11   5  -2 72.9674 25.0003   5
  11   5  -2 86.0560 21.7874   2
  11   5  -2 60.4148 26.1462   5
 -11  -5   2 65.5607 21.4453   5
 -11  -5   2 82.0273 16.1876   3
 -11  -5   2 95.9025 23.4522   2
 -11  -5   2 20.3305 26.5411   5
  10   5  -2 -0.7320 12.9507   4
  10   5  -2 -16.942 17.7690   5
  10   5  -2 -12.474 13.2586   5
  10   5  -2 28.9465 18.4762   2
 -10  -5   2 22.5733 19.5098   5
 -10  -5   2 -13.112 11.0652   3
 -10  -5   2 14.5703 20.6522   5
 -10  -5   2 2.44794 17.6573   2
 -10  -5   2 13.5360 12.1833   3
   9   5  -2 31.9250 12.3106   4
   9   5  -2 13.4454 15.1897   5
   9   5  -2 33.8574 15.3177   2
   9   5  -2 47.3392 16.2987   5
  -9  -5   2 28.2053 14.2358   5
  -9  -5   2 53.0382 10.4252   3
  -9  -5   2 -7.1511 16.4050   5
  -9  -5   2 14.8842 10.3466   3
  -9  -5   2 27.6449 15.8735   2
  -9  -5   2 26.4150 12.9344   4
   8   5  -2 303.470 20.1547   4
   8   5  -2 326.551 25.6552   5
   8   5  -2 300.052 22.9091   2
   8   5  -2 282.374 23.9974   5
  -8  -5   2 296.118 14.8762   3
  -8  -5   2 298.613 24.1820   2
  -8  -5   2 288.219 20.7435   4
  -8  -5   2 304.681 24.6092   5
  -8  -5   2 308.313 15.6354   3
  -8  -5   2 262.985 26.6172   5
   7   5  -2 10.4718 9.88025   4
   7   5  -2 8.82144 10.0510   2
   7   5  -2 4.83645 8.64332   5
   7   5  -2 16.1571 11.8489   5
  -7  -5   2 0.96058 9.44455   3
  -7  -5   2 -3.1499 9.15842   4
  -7  -5   2 4.65878 11.8382   5
  -7  -5   2 -1.0280 10.4710   2
  -7  -5   2 13.1695 12.0819   5
   6   5  -2 4.59479 8.71180   5
   6   5  -2 -2.1170 9.58716   5
   6   5  -2 -0.1591 7.06948   4
   6   5  -2 1.22647 10.1612   2
  -6  -5   2 -1.5121 8.02384   4
  -6  -5   2 -5.3055 8.57281   5
  -6  -5   2 4.52585 9.08129   2
  -6  -5   2 -2.1967 9.84353   5
   5   5  -2 60.9298 8.68669   5
   5   5  -2 65.8739 8.50917   4
   5   5  -2 59.8874 9.87213   5
   5   5  -2 67.8467 9.34889   2
  -5  -5   2 71.5249 10.4407   5
  -5  -5   2 73.3752 10.5625   2
  -5  -5   2 70.6469 10.6775   5
  -5  -5   2 77.2135 9.89115   4
   4   5  -2 1479.45 32.7417   4
   4   5  -2 1477.19 33.8029   5
   4   5  -2 1464.54 34.3116   5
   4   5  -2 1467.85 33.4012   2
  -4  -5   2 1462.41 33.8893   2
  -4  -5   2 1499.41 33.9601   4
  -4  -5   2 1468.41 33.6752   5
   3   5  -2 240.256 13.0283   2
   3   5  -2 252.491 11.6521   5
   3   5  -2 223.821 12.7972   5
   3   5  -2 247.613 12.1093   4
  -3  -5   2 243.885 13.3790   5
  -3  -5   2 238.411 11.8301   5
  -3  -5   2 236.921 13.4982   2
   2   5  -2 669.852 16.8090   5
   2   5  -2 677.846 17.5163   5
   2   5  -2 670.417 18.5451   4
   2   5  -2 654.727 18.7780   2
   2   5  -2 695.563 17.1700   3
  -2  -5   2 656.088 16.8158   5
  -2  -5   2 643.587 17.5092   5
  -2  -5   2 634.994 19.5109   2
   1   5  -2 195.625 7.72150   5
   1   5  -2 194.628 8.67772   5
   1   5  -2 185.384 11.2329   3
   1   5  -2 189.184 11.3880   2
   1   5  -2 197.462 10.5833   4
  -1  -5   2 204.890 12.6197   2
  -1  -5   2 203.257 8.24241   5
  -1  -5   2 195.737 8.17909   5
   0   5  -2 2.85404 6.05587   3
   0   5  -2 4.06198 4.67455   4
   0   5  -2 -8.6288 5.27133   2
  -1   5  -2 1576.34 34.3871   2
  -1   5  -2 1542.70 36.6741   3
  -1   5  -2 1578.68 33.4501   4
  -2   5  -2 97.8536 11.1348   3
  -2   5  -2 110.616 12.6524   2
  -2   5  -2 101.749 10.4914   4
  -3   5  -2 662.242 19.5059   4
  -3   5  -2 691.923 22.9660   2
  -3   5  -2 690.434 15.9377   5
  -3   5  -2 679.044 16.5055   5
  -3   5  -2 663.882 26.0483   3
   3  -5   2 682.143 15.9755   5
   3  -5   2 694.364 15.5312   5
  -4   5  -2 93.6166 8.65047   5
  -4   5  -2 88.2008 8.55335   4
  -4   5  -2 70.3311 12.4158   3
  -4   5  -2 99.5819 9.44646   5
  -4   5  -2 85.4758 10.8347   2
   4  -5   2 86.9861 8.72004   5
   4  -5   2 78.2382 11.5585   2
  -5   5  -2 458.275 26.1575   3
  -5   5  -2 473.232 17.4594   5
  -5   5  -2 438.919 21.4359   2
  -5   5  -2 449.716 16.1908   5
  -5   5  -2 459.862 16.3112   4
   5  -5   2 411.029 22.7696   2
   5  -5   2 464.772 16.8101   5
   5  -5   2 434.547 15.7503   4
   5  -5   2 449.775 16.3502   5
  -6   5  -2 0.80736 12.3555   3
  -6   5  -2 1.03463 9.67343   2
  -6   5  -2 -0.8784 8.14382   5
  -6   5  -2 4.69311 7.99870   5
  -6   5  -2 -2.0912 6.34874   4
   6  -5   2 -15.918 7.13611   5
   6  -5   2 7.76412 8.07549   5
   6  -5   2 -17.604 11.2370   2
   6  -5   2 -8.4598 6.47812   4
  -7   5  -2 112.169 13.4562   5
  -7   5  -2 111.134 19.2388   3
  -7   5  -2 107.680 12.2093   5
  -7   5  -2 108.625 12.2138   4
  -7   5  -2 92.4428 18.7315   3
  -7   5  -2 127.318 16.0199   2
   7  -5   2 119.649 13.4637   4
   7  -5   2 117.729 12.6902   5
   7  -5   2 94.5767 12.2152   5
   7  -5   2 104.613 16.6091   2
  -8   5  -2 120.474 23.1034   3
  -8   5  -2 116.245 10.2392   4
  -8   5  -2 157.089 29.3366   3
  -8   5  -2 121.630 15.0642   5
  -8   5  -2 135.496 16.4633   5
   8  -5   2 131.613 20.3421   2
   8  -5   2 130.845 11.7304   4
   8  -5   2 111.058 14.2648   5
   8  -5   2 150.658 22.7175   5
  -9   5  -2 498.659 30.1058   5
  -9   5  -2 611.871 18.6845   4
  -9   5  -2 556.232 32.7304   2
  -9   5  -2 565.993 30.0637   5
  -9   5  -2 548.670 39.5349   3
  -9   5  -2 633.400 44.8336   3
   9  -5   2 567.347 29.2598   5
   9  -5   2 570.121 29.0216   5
   9  -5   2 527.342 37.8173   2
   9  -5   2 564.130 21.9724   4
 -10   5  -2 37.1979 22.6754   3
 -10   5  -2 52.6120 19.5121   5
 -10   5  -2 41.6453 19.6878   5
 -10   5  -2 56.2361 28.7305   3
 -10   5  -2 53.5960 19.8044   2
 -10   5  -2 65.8386 9.28997   4
  10  -5   2 52.3530 16.5032   5
  10  -5   2 53.9863 24.1447   2
  10  -5   2 47.1715 17.1849   5
  10  -5   2 73.8563 12.5123   4
 -11   5  -2 60.0895 28.4430   5
 -11   5  -2 92.9103 34.7724   3
 -11   5  -2 87.2663 25.7738   5
 -11   5  -2 45.8449 9.97791   4
 -11   5  -2 63.4476 23.7922   2
 -11   5  -2 63.8352 26.2874   3
  11  -5   2 67.9164 21.7602   5
  11  -5   2 101.480 22.2175   5
  11  -5   2 72.3619 14.0598   4
 -12   5  -2 34.6339 25.6780   2
 -12   5  -2 77.9667 34.8527   3
  12  -5   2 17.8186 22.4566   5
  13   4  -2 98.8268 25.5488   5
  13   4  -2 164.109 36.3078   5
  13   4  -2 117.786 27.4805   4
 -13  -4   2 177.339 33.1790   2
 -13  -4   2 110.825 32.0838   5
  12   4  -2 210.275 31.8263   5
  12   4  -2 144.979 22.5971   4
  12   4  -2 142.897 31.1373   5
 -12  -4   2 190.980 34.0351   5
 -12  -4   2 116.121 20.2197   3
 -12  -4   2 204.912 24.7858   3
 -12  -4   2 182.365 34.0122   5
 -12  -4   2 166.728 27.5673   2
  11   4  -2 96.4415 24.6087   2
  11   4  -2 110.521 25.4507   5
  11   4  -2 68.9710 22.7743   5
  11   4  -2 113.768 18.3744   4
 -11  -4   2 97.3462 23.0107   5
 -11  -4   2 104.496 17.2505   3
 -11  -4   2 141.819 24.3972   2
 -11  -4   2 141.845 25.5728   5
 -11  -4   2 128.264 20.3772   3
  10   4  -2 -4.8602 16.9335   5
  10   4  -2 19.0191 14.1995   5
  10   4  -2 3.54173 17.5496   2
  10   4  -2 -15.530 12.5256   4
 -10  -4   2 11.7748 12.7896   4
 -10  -4   2 1.30377 11.7506   3
 -10  -4   2 24.7580 19.6511   5
 -10  -4   2 5.52871 13.6038   3
 -10  -4   2 1.77933 17.4068   5
 -10  -4   2 22.1895 16.6805   2
   9   4  -2 25.8878 17.4265   5
   9   4  -2 44.3244 16.5479   5
   9   4  -2 46.2271 14.8620   2
   9   4  -2 29.2692 11.2842   4
  -9  -4   2 40.7925 14.9767   2
  -9  -4   2 49.6702 12.4576   4
  -9  -4   2 28.0538 15.9163   5
  -9  -4   2 48.5614 11.2437   3
  -9  -4   2 73.8190 23.9271   5
  -9  -4   2 47.3740 12.1407   3
   8   4  -2 26.0123 12.1491   5
   8   4  -2 10.2902 11.7288   5
   8   4  -2 -2.5217 11.2538   2
  -8  -4   2 -17.359 12.1417   5
  -8  -4   2 10.1451 17.0311   5
  -8  -4   2 2.86587 8.40265   3
  -8  -4   2 0.61009 9.50952   4
  -8  -4   2 -6.0628 11.9964   2
  -8  -4   2 9.07862 8.96390   3
   7   4  -2 79.5422 11.8986   5
   7   4  -2 96.7926 10.4021   4
   7   4  -2 93.9412 12.6654   2
   7   4  -2 137.016 20.0695   5
  -7  -4   2 83.9741 13.2688   5
  -7  -4   2 94.4024 13.2533   2
  -7  -4   2 107.922 11.4716   4
  -7  -4   2 88.8493 11.9871   3
  -7  -4   2 109.041 11.9625   3
  -7  -4   2 68.4428 13.6146   5
   6   4  -2 52.7216 11.3191   5
   6   4  -2 51.8222 10.3491   2
   6   4  -2 52.6765 8.33570   4
   6   4  -2 47.3909 9.39863   5
  -6  -4   2 41.3665 9.98624   5
  -6  -4   2 62.1575 8.89320   4
  -6  -4   2 66.0665 10.7999   2
  -6  -4   2 50.4331 11.2936   5
  -6  -4   2 55.6338 7.04190   3
   5   4  -2 1027.44 28.2942   5
   5   4  -2 1043.68 25.5211   4
   5   4  -2 1033.00 27.0046   2
   5   4  -2 1052.39 29.2714   5
  -5  -4   2 1048.83 29.5054   5
  -5  -4   2 1027.76 27.7244   2
  -5  -4   2 1026.55 26.3378   4
  -5  -4   2 1016.18 28.0431   5
  -5  -4   2 1095.97 23.4209   3
   4   4  -2 7.69692 6.05818   5
   4   4  -2 6.22325 6.20577   2
   4   4  -2 3.40849 5.16953   4
   4   4  -2 7.67800 3.39308   3
   4   4  -2 8.59516 7.32548   5
  -4  -4   2 7.55790 6.77237   5
  -4  -4   2 14.0437 6.34740   5
  -4  -4   2 -2.0620 6.65201   2
  -4  -4   2 10.1452 5.92893   4
   3   4  -2 16.2019 5.06726   5
   3   4  -2 20.8610 5.17774   4
   3   4  -2 26.7693 6.37532   2
   3   4  -2 16.1635 5.87572   5
   3   4  -2 21.9121 3.26119   3
  -3  -4   2 19.6451 6.55001   2
  -3  -4   2 21.2015 3.77188   3
  -3  -4   2 26.5182 6.49209   5
   2   4  -2 488.000 13.8119   5
   2   4  -2 506.316 14.5924   5
   2   4  -2 508.849 12.8962   3
   2   4  -2 509.942 14.8329   4
   2   4  -2 508.045 15.2629   2
  -2  -4   2 481.159 14.6123   5
  -2  -4   2 493.939 15.8665   2
  -2  -4   2 508.221 14.1417   5
  -2  -4   2 492.585 12.9398   3
   1   4  -2 719.293 18.0025   3
   1   4  -2 705.071 18.1957   2
   1   4  -2 704.767 15.8842   5
   1   4  -2 703.128 17.7947   4
   1   4  -2 716.388 15.4329   5
  -1  -4   2 706.838 18.9149   2
  -1  -4   2 714.534 15.6572   5
  -1  -4   2 688.851 15.3563   5
  -1  -4   2 699.584 17.5873   3
   0   4  -2 477.514 10.6051   5
   0   4  -2 478.989 10.1622   5
   0   4  -2 470.882 16.0451   3
   0   4  -2 478.398 15.0124   2
   0  -4   2 475.764 15.6560   2
   0  -4   2 465.655 15.5412   3
  -1   4  -2 262.588 11.6766   4
  -1   4  -2 252.324 13.8213   3
  -2   4  -2 399.223 13.7964   4
  -2   4  -2 395.964 10.3691   5
  -2   4  -2 370.815 15.7429   2
  -2   4  -2 405.161 9.89867   5
  -2   4  -2 383.751 17.6658   3
   2  -4   2 399.051 9.40200   5
   2  -4   2 396.114 10.0439   5
  -3   4  -2 65.0126 8.69202   2
  -3   4  -2 71.0416 6.95773   5
  -3   4  -2 79.6300 11.0723   3
  -3   4  -2 68.0828 7.24331   4
  -3   4  -2 75.3672 7.48389   5
   3  -4   2 77.3557 6.89165   5
   3  -4   2 74.6332 10.1262   2
   3  -4   2 75.1042 7.32027   4
  -4   4  -2 632.784 21.9578   2
  -4   4  -2 602.400 16.8686   5
  -4   4  -2 628.988 17.9099   5
  -4   4  -2 605.484 24.9209   3
  -4   4  -2 619.709 17.6437   4
   4  -4   2 613.361 17.0666   5
   4  -4   2 613.920 17.5875   4
   4  -4   2 640.019 17.4868   5
   4  -4   2 600.249 22.4671   2
  -5   4  -2 736.870 19.5997   4
  -5   4  -2 741.295 24.5807   2
  -5   4  -2 727.160 29.3601   3
  -5   4  -2 744.839 20.7098   5
  -5   4  -2 734.089 21.7708   5
   5  -4   2 704.975 20.5733   5
   5  -4   2 706.779 19.7808   4
   5  -4   2 743.159 26.2922   2
   5  -4   2 723.391 21.1202   5
  -6   4  -2 257.051 19.3240   5
  -6   4  -2 264.259 12.8658   4
  -6   4  -2 243.359 14.9682   5
  -6   4  -2 238.635 26.3198   3
  -6   4  -2 242.241 18.5271   2
   6  -4   2 258.047 20.9926   2
   6  -4   2 255.260 16.0216   5
   6  -4   2 261.371 13.6729   4
   6  -4   2 254.987 15.3867   5
  -7   4  -2 67.8521 10.3863   5
  -7   4  -2 88.4837 12.9086   5
  -7   4  -2 71.5768 14.7568   3
  -7   4  -2 90.2756 13.8057   2
  -7   4  -2 55.6153 15.9601   3
  -7   4  -2 85.7089 8.49977   4
   7  -4   2 70.1422 11.9068   5
   7  -4   2 57.6109 19.1705   5
   7  -4   2 68.9834 14.3931   2
   7  -4   2 75.1177 9.34285   4
  -8   4  -2 9.20302 12.4754   5
  -8   4  -2 10.3928 11.1283   5
  -8   4  -2 4.23051 12.6196   2
  -8   4  -2 10.6479 6.76322   4
  -8   4  -2 -1.9006 16.2534   3
  -8   4  -2 10.0129 15.4439   3
   8  -4   2 22.2947 12.6920   5
   8  -4   2 2.19946 14.7595   2
   8  -4   2 -0.1701 8.66972   4
   8  -4   2 19.5668 10.2960   5
  -9   4  -2 100.681 23.1152   3
  -9   4  -2 100.828 9.51731   4
  -9   4  -2 83.5986 16.9424   5
  -9   4  -2 91.3897 17.4497   2
  -9   4  -2 95.4624 22.6690   3
  -9   4  -2 100.787 18.3591   5
   9  -4   2 106.070 11.8822   4
   9  -4   2 108.510 20.8154   2
   9  -4   2 56.3205 14.9288   5
   9  -4   2 87.9524 15.7756   5
 -10   4  -2 -2.2002 16.7997   5
 -10   4  -2 -26.141 16.8891   5
 -10   4  -2 -4.7690 7.67708   4
 -10   4  -2 5.73608 19.8797   3
 -10   4  -2 -23.845 22.5337   3
 -10   4  -2 -21.828 16.7098   2
  10  -4   2 -8.7324 16.0824   5
  10  -4   2 -7.3171 15.0055   5
  10  -4   2 1.87815 10.9968   4
  10  -4   2 -32.570 20.3728   2
 -11   4  -2 53.4785 21.2988   2
 -11   4  -2 64.5969 32.2854   3
 -11   4  -2 51.7669 24.3181   5
 -11   4  -2 14.8396 24.1682   5
 -11   4  -2 42.4896 10.1182   4
 -11   4  -2 54.1170 25.5400   3
  11  -4   2 73.5704 14.2454   4
  11  -4   2 57.4663 29.6928   2
  11  -4   2 54.5646 19.3914   5
 -12   4  -2 9.32903 10.2019   4
 -12   4  -2 9.22238 31.0727   3
 -12   4  -2 27.3136 30.6318   5
 -12   4  -2 16.4820 23.3842   2
  12  -4   2 37.6502 25.0320   5
 -13   4  -2 23.1710 36.0119   3
  13  -4   2 92.9465 29.1890   5
  13   3  -2 -23.690 29.4424   5
  13   3  -2 13.9058 22.5203   4
  13   3  -2 12.3366 24.4093   5
 -13  -3   2 -10.045 22.9021   3
 -13  -3   2 1.27178 26.6937   2
 -13  -3   2 -11.248 36.2536   5
 -13  -3   2 -37.914 34.1684   5
  12   3  -2 80.0132 27.7326   5
  12   3  -2 125.956 20.2309   4
  12   3  -2 105.329 27.1245   5
 -12  -3   2 81.4377 25.5300   3
 -12  -3   2 66.8828 22.5204   5
 -12  -3   2 88.9273 29.8057   5
 -12  -3   2 107.376 21.6359   3
 -12  -3   2 124.270 26.6260   2
  11   3  -2 51.9544 16.5102   4
  11   3  -2 81.7732 24.4533   2
  11   3  -2 69.9564 23.2826   5
  11   3  -2 130.190 31.8496   5
 -11  -3   2 79.5070 20.9943   2
 -11  -3   2 73.7739 26.1694   5
 -11  -3   2 78.3381 17.1816   3
 -11  -3   2 35.0100 20.4110   5
 -11  -3   2 56.7710 19.5903   3
  10   3  -2 38.5182 24.2227   5
  10   3  -2 47.1734 12.8721   4
  10   3  -2 29.3140 15.6871   2
  10   3  -2 45.4210 18.6945   5
 -10  -3   2 25.9369 13.3921   3
 -10  -3   2 24.0279 17.3710   5
 -10  -3   2 58.7325 13.7195   4
 -10  -3   2 44.2920 16.0252   3
 -10  -3   2 44.1182 16.8667   2
 -10  -3   2 65.4628 20.7293   5
   9   3  -2 -0.0696 13.0611   5
   9   3  -2 -0.4160 13.5858   5
   9   3  -2 5.48989 10.1190   4
   9   3  -2 27.4530 13.5699   2
  -9  -3   2 3.16641 10.9299   3
  -9  -3   2 -9.0752 11.6709   3
  -9  -3   2 -21.468 9.89046   4
  -9  -3   2 -1.7166 12.3245   5
  -9  -3   2 -17.949 12.6257   2
  -9  -3   2 18.0783 14.9254   5
   8   3  -2 702.983 29.0961   5
   8   3  -2 686.342 22.8170   4
   8   3  -2 710.026 30.0683   5
   8   3  -2 651.034 27.6892   2
  -8  -3   2 656.210 24.9398   3
  -8  -3   2 645.675 27.6701   2
  -8  -3   2 712.943 23.6347   4
  -8  -3   2 680.830 23.5360   3
  -8  -3   2 686.367 29.6880   5
   7   3  -2 19.8700 10.1717   2
   7   3  -2 21.9987 10.7625   5
   7   3  -2 12.4838 10.4119   5
   7   3  -2 15.6202 7.35811   4
  -7  -3   2 16.8565 7.77979   3
  -7  -3   2 3.89291 10.2779   5
  -7  -3   2 11.8464 9.74841   2
  -7  -3   2 16.2215 7.81526   4
  -7  -3   2 19.6713 10.5176   5
   6   3  -2 2.86541 7.61057   2
   6   3  -2 5.62428 5.89189   4
   6   3  -2 -4.1364 6.90093   5
   6   3  -2 -2.1056 7.11319   5
  -6  -3   2 7.59844 7.78158   2
  -6  -3   2 9.32024 12.9348   5
  -6  -3   2 11.3056 6.55946   4
  -6  -3   2 6.03757 6.07896   3
  -6  -3   2 1.74654 8.34450   5
   5   3  -2 683.197 22.7494   5
   5   3  -2 698.835 21.9352   5
   5   3  -2 678.310 18.6145   4
   5   3  -2 702.657 21.1861   2
  -5  -3   2 664.916 23.1388   5
  -5  -3   2 672.316 19.2879   4
  -5  -3   2 676.621 17.2892   3
  -5  -3   2 664.261 21.9831   5
  -5  -3   2 682.116 21.1877   2
   4   3  -2 785.215 19.5624   4
   4   3  -2 779.093 20.7338   2
   4   3  -2 768.680 22.7164   5
   4   3  -2 767.563 17.3384   3
   4   3  -2 774.883 21.6894   5
  -4  -3   2 767.792 20.0958   4
  -4  -3   2 773.932 17.5463   3
  -4  -3   2 775.255 22.7541   5
  -4  -3   2 809.293 21.5630   2
  -4  -3   2 759.793 21.6630   5
   3   3  -2 411.797 13.7083   2
   3   3  -2 393.140 13.4225   5
   3   3  -2 390.234 9.80424   3
   3   3  -2 399.202 12.5553   4
   3   3  -2 421.795 14.8296   5
  -3  -3   2 410.628 14.0111   2
  -3  -3   2 375.844 13.1353   4
  -3  -3   2 397.200 13.8484   5
  -3  -3   2 331.131 13.7236   3
  -3  -3   2 399.304 14.3486   5
   2   3  -2 6.55708 3.92554   4
   2   3  -2 10.3757 4.64038   2
   2   3  -2 11.6612 4.05520   5
   2   3  -2 12.1439 5.02919   5
  -2  -3   2 6.48576 4.94357   2
  -2  -3   2 -0.7757 4.65394   3
  -2  -3   2 -1.1327 2.80996   5
  -2  -3   2 10.9016 4.56390   5
   1   3  -2 11.4623 4.58128   3
   1   3  -2 16.2752 4.32639   4
   1   3  -2 14.0030 4.72796   2
   1   3  -2 15.4441 3.57704   5
   1   3  -2 19.9387 4.02408   5
  -1  -3   2 14.0210 5.03007   2
  -1  -3   2 16.0234 4.50307   3
  -1  -3   2 19.1997 4.06618   5
  -1  -3   2 20.5881 4.70992   5
   0   3  -2 36.1954 5.90284   3
   0   3  -2 36.0438 3.64086   5
   0   3  -2 29.7758 5.43626   2
   0   3  -2 37.2882 4.25187   5
   0  -3   2 35.9953 3.32425   5
   0  -3   2 34.3045 3.54972   5
   0  -3   2 27.2965 5.66574   2
   0  -3   2 34.7748 5.91284   3
  -1   3  -2 1142.93 24.0927   4
  -1   3  -2 1126.40 20.6037   5
  -1   3  -2 1141.67 20.4624   5
  -1   3  -2 1159.12 26.9618   3
   1  -3   2 1111.23 26.5951   3
  -2   3  -2 1147.25 28.9794   3
  -2   3  -2 1172.72 27.0635   2
  -2   3  -2 1193.22 22.3597   5
  -2   3  -2 1135.99 22.5571   5
  -2   3  -2 1187.24 24.8000   4
   2  -3   2 1153.15 22.1818   5
   2  -3   2 1175.02 24.5034   4
   2  -3   2 1179.80 22.4986   5
  -3   3  -2 19.5334 4.38204   5
  -3   3  -2 21.8703 5.01639   5
  -3   3  -2 17.8825 5.18802   4
  -3   3  -2 20.9411 7.95172   3
  -3   3  -2 1.13311 5.96912   2
   3  -3   2 12.6884 4.99761   4
   3  -3   2 12.9571 6.83889   2
   3  -3   2 17.9044 4.77806   5
   3  -3   2 22.2383 4.80481   5
  -4   3  -2 205.356 10.5807   4
  -4   3  -2 176.776 15.9939   3
  -4   3  -2 204.159 10.5749   5
  -4   3  -2 202.908 13.4182   2
  -4   3  -2 194.532 11.2036   5
   4  -3   2 195.208 10.4691   5
   4  -3   2 176.815 13.8328   5
   4  -3   2 194.635 10.8508   4
   4  -3   2 189.874 14.4291   2
  -5   3  -2 568.710 18.9093   5
  -5   3  -2 570.840 16.1853   4
  -5   3  -2 602.624 21.3502   2
  -5   3  -2 556.960 24.5652   3
  -5   3  -2 563.687 18.0838   5
   5  -3   2 557.527 17.0304   4
   5  -3   2 574.500 18.8874   5
   5  -3   2 548.342 22.2608   2
   5  -3   2 570.927 18.3555   5
  -6   3  -2 1062.71 30.6499   2
  -6   3  -2 1092.25 29.7644   5
  -6   3  -2 1073.63 36.4059   3
  -6   3  -2 1073.76 28.1781   5
  -6   3  -2 1095.39 24.1974   4
   6  -3   2 1073.42 28.9208   5
   6  -3   2 1130.16 33.0518   2
   6  -3   2 1107.19 25.7251   4
   6  -3   2 920.381 27.6187   5
  -7   3  -2 455.518 31.4025   3
  -7   3  -2 417.818 27.2390   3
  -7   3  -2 473.271 22.8499   2
  -7   3  -2 433.894 20.4341   5
  -7   3  -2 449.921 15.1040   4
  -7   3  -2 458.357 22.8445   5
   7  -3   2 439.247 17.0515   4
   7  -3   2 479.482 21.6699   5
   7  -3   2 468.894 25.2164   2
  -8   3  -2 572.134 25.7892   5
  -8   3  -2 594.706 31.9563   3
  -8   3  -2 614.340 34.8553   3
  -8   3  -2 590.969 17.8517   4
  -8   3  -2 595.477 28.1465   5
  -8   3  -2 605.442 27.3235   2
   8  -3   2 599.024 26.2635   5
   8  -3   2 586.534 20.7348   4
   8  -3   2 580.808 30.2653   2
  -9   3  -2 283.257 34.8826   3
  -9   3  -2 261.590 25.6006   2
  -9   3  -2 279.355 14.3388   4
  -9   3  -2 247.631 29.4066   3
  -9   3  -2 222.540 26.7983   5
  -9   3  -2 298.968 24.7405   5
   9  -3   2 254.999 23.7239   5
   9  -3   2 243.168 23.1951   5
   9  -3   2 300.846 29.6864   2
   9  -3   2 249.117 18.1590   4
 -10   3  -2 389.206 30.9826   2
 -10   3  -2 282.447 33.9843   3
 -10   3  -2 408.961 33.7137   5
 -10   3  -2 294.912 39.0697   3
 -10   3  -2 299.172 29.4290   5
 -10   3  -2 315.566 15.9013   4
  10  -3   2 398.450 36.1346   2
  10  -3   2 323.390 28.7273   5
  10  -3   2 324.161 21.3477   4
  10  -3   2 297.868 28.9154   5
 -11   3  -2 127.921 23.3244   2
 -11   3  -2 120.274 24.4797   5
 -11   3  -2 120.291 26.5946   3
 -11   3  -2 120.419 11.6842   4
 -11   3  -2 174.364 24.3851   5
 -11   3  -2 214.235 33.9373   3
  11  -3   2 120.612 21.5316   5
  11  -3   2 119.716 16.4026   4
  11  -3   2 168.084 24.7941   5
  11  -3   2 183.532 31.4753   2
 -12   3  -2 435.751 43.3884   5
 -12   3  -2 427.077 39.9031   2
 -12   3  -2 404.008 44.9130   5
 -12   3  -2 393.304 20.8935   4
 -12   3  -2 422.842 51.6075   3
 -12   3  -2 428.992 57.9865   3
  12  -3   2 387.848 37.7614   5
  12  -3   2 361.184 38.8362   5
  12  -3   2 385.537 28.5632   4
 -13   3  -2 4.69341 33.3529   3
 -13   3  -2 24.4516 28.1934   2
  13  -3   2 10.7945 29.2235   5
  13   2  -2 84.9912 28.3979   5
 -13  -2   2 136.801 34.5463   5
 -13  -2   2 90.1260 30.1986   2
 -13  -2   2 104.745 33.1784   3
 -13  -2   2 106.157 29.8537   3
 -13  -2   2 167.961 42.1329   5
  12   2  -2 7.27117 16.7888   4
  12   2  -2 16.7961 25.2174   5
  12   2  -2 35.2574 24.7094   5
 -12  -2   2 55.7590 25.4889   5
 -12  -2   2 -8.8898 22.1069   2
 -12  -2   2 14.6538 28.7127   5
 -12  -2   2 1.12933 23.8511   3
 -12  -2   2 13.9679 20.6292   3
  11   2  -2 319.393 36.6670   2
  11   2  -2 385.627 34.5172   5
  11   2  -2 343.477 36.0435   5
  11   2  -2 246.438 25.5063   4
 -11  -2   2 256.401 26.8274   2
 -11  -2   2 277.573 34.2602   5
 -11  -2   2 343.126 35.9594   3
 -11  -2   2 236.736 29.8066   3
 -11  -2   2 220.278 29.2147   5
  10   2  -2 40.0194 18.2698   5
  10   2  -2 24.2981 11.7926   4
  10   2  -2 0.53002 16.2662   2
  10   2  -2 -4.3230 15.8863   5
 -10  -2   2 14.5903 11.6697   4
 -10  -2   2 18.7927 16.9229   3
 -10  -2   2 3.00708 15.4793   2
 -10  -2   2 21.4386 15.1810   3
 -10  -2   2 12.6741 16.7654   5
 -10  -2   2 22.9937 19.6913   5
   9   2  -2 454.436 20.8668   4
   9   2  -2 611.445 35.6153   5
   9   2  -2 477.617 29.3108   5
   9   2  -2 481.274 27.4223   2
  -9  -2   2 509.899 21.2531   4
  -9  -2   2 485.229 31.9179   5
  -9  -2   2 526.086 26.3443   3
  -9  -2   2 433.991 30.1719   2
  -9  -2   2 508.733 29.6153   5
  -9  -2   2 495.371 27.6922   3
   8   2  -2 304.886 21.5732   2
   8   2  -2 471.420 30.7347   5
   8   2  -2 327.257 16.3989   4
   8   2  -2 342.323 21.8633   5
  -8  -2   2 322.622 24.6326   5
  -8  -2   2 465.453 30.7713   5
  -8  -2   2 306.095 21.3822   3
  -8  -2   2 387.497 22.4650   2
  -8  -2   2 349.232 20.3506   3
  -8  -2   2 366.638 17.2177   4
   7   2  -2 828.072 28.4397   5
   7   2  -2 835.704 29.2127   5
   7   2  -2 820.837 27.2753   2
   7   2  -2 789.213 21.7272   4
  -7  -2   2 793.120 29.6952   5
  -7  -2   2 808.009 24.9857   3
  -7  -2   2 806.563 26.5990   2
  -7  -2   2 825.477 22.3915   4
   6   2  -2 150.830 17.1878   5
   6   2  -2 129.187 13.2436   2
   6   2  -2 126.679 15.0591   5
   6   2  -2 121.393 10.2320   4
  -6  -2   2 110.355 11.9550   5
  -6  -2   2 133.831 16.1349   5
  -6  -2   2 138.669 13.9090   2
  -6  -2   2 119.115 11.9088   3
  -6  -2   2 115.895 10.1148   4
   5   2  -2 25.9971 7.10254   2
   5   2  -2 23.8944 5.46368   4
   5   2  -2 30.6537 7.96463   5
   5   2  -2 24.5755 7.31806   5
  -5  -2   2 34.9163 8.78623   5
  -5  -2   2 38.2165 7.78521   2
  -5  -2   2 29.9416 8.09772   5
  -5  -2   2 23.3251 6.38082   3
  -5  -2   2 21.6435 5.56724   4
   4   2  -2 159.504 10.6894   2
   4   2  -2 163.739 12.0581   5
   4   2  -2 140.560 9.44511   3
   4   2  -2 157.877 8.85546   4
  -4  -2   2 148.307 10.7911   2
  -4  -2   2 156.772 12.0865   5
  -4  -2   2 149.940 9.02988   3
  -4  -2   2 152.915 9.07227   4
  -4  -2   2 132.930 11.1229   5
   3   2  -2 1550.94 28.6839   3
   3   2  -2 1544.20 30.8995   2
   3   2  -2 1553.68 29.3917   4
   3   2  -2 1548.10 31.6195   5
  -3  -2   2 1513.16 29.7817   4
  -3  -2   2 1535.99 31.7576   5
  -3  -2   2 1462.58 31.9039   5
  -3  -2   2 1515.01 28.5778   3
  -3  -2   2 1495.70 30.8820   2
   2   2  -2 588.899 12.8236   3
   2   2  -2 562.304 13.8882   4
   2   2  -2 578.611 15.4301   5
   2   2  -2 583.453 14.8250   5
   2   2  -2 592.291 14.9220   2
  -2  -2   2 584.065 15.0549   5
  -2  -2   2 582.802 15.1587   2
   1   2  -2 2585.08 44.7041   3
   1   2  -2 2606.20 45.4457   2
   1   2  -2 2556.82 44.8190   5
   1   2  -2 2521.98 44.4695   5
  -1  -2   2 2592.24 45.6473   2
  -1  -2   2 2551.68 44.6490   5
   0   2  -2 4441.14 74.8160   3
   0   2  -2 4353.75 71.8632   5
   0   2  -2 4426.26 73.9942   2
   0   2  -2 4353.95 73.9367   4
   0   2  -2 4371.69 71.8117   5
   0  -2   2 4339.10 71.8671   5
   0  -2   2 4494.34 75.0239   3
   0  -2   2 4169.10 71.8736   5
  -1   2  -2 549.468 11.6173   5
  -1   2  -2 535.211 11.7773   5
  -1   2  -2 539.202 16.0219   3
  -1   2  -2 541.443 13.9279   4
   1  -2   2 548.157 11.5421   5
   1  -2   2 553.637 13.7993   4
   1  -2   2 531.052 16.1015   3
   1  -2   2 486.262 12.5519   5
  -2   2  -2 544.682 13.3715   5
  -2   2  -2 553.091 16.0522   2
  -2   2  -2 544.713 12.9329   5
  -2   2  -2 547.074 14.1296   4
  -2   2  -2 537.173 17.8431   3
   2  -2   2 562.557 14.1917   4
   2  -2   2 543.359 12.9548   5
   2  -2   2 530.430 17.4350   3
   2  -2   2 532.167 16.2821   2
  -3   2  -2 145.920 8.33610   5
  -3   2  -2 136.894 10.8365   2
  -3   2  -2 149.262 8.74397   5
  -3   2  -2 158.219 8.61498   4
  -3   2  -2 145.409 12.7209   3
   3  -2   2 156.119 8.58125   5
   3  -2   2 150.029 11.3656   2
   3  -2   2 152.292 8.88011   4
   3  -2   2 142.551 8.43190   5
  -4   2  -2 55.6485 8.02467   2
  -4   2  -2 47.0708 5.85843   4
  -4   2  -2 48.7703 7.20538   5
  -4   2  -2 41.2191 8.98674   3
  -4   2  -2 51.7875 6.76024   5
   4  -2   2 44.0930 8.33872   2
   4  -2   2 54.7618 6.45858   4
   4  -2   2 50.6138 6.21086   5
  -5   2  -2 14.0658 5.23284   4
  -5   2  -2 10.4417 6.58082   5
  -5   2  -2 10.3498 7.03270   2
  -5   2  -2 21.9617 8.98768   3
  -5   2  -2 12.1176 6.92830   5
   5  -2   2 8.81364 5.99966   4
   5  -2   2 19.9750 7.75514   2
   5  -2   2 16.5186 7.30152   5
  -6   2  -2 217.313 14.3976   5
  -6   2  -2 226.632 15.9974   2
  -6   2  -2 219.080 15.1891   5
  -6   2  -2 221.665 10.8852   4
  -6   2  -2 220.009 19.6661   3
   6  -2   2 223.656 12.8948   4
   6  -2   2 187.528 14.1552   5
   6  -2   2 215.214 16.7850   2
   6  -2   2 220.392 14.3450   5
  -7   2  -2 857.670 29.4565   5
  -7   2  -2 946.080 29.4001   2
  -7   2  -2 932.809 21.9139   4
  -7   2  -2 979.855 35.3004   3
  -7   2  -2 900.789 28.3715   5
   7  -2   2 907.051 30.8549   2
   7  -2   2 904.602 28.7848   5
   7  -2   2 931.399 24.2718   4
   7  -2   2 880.132 28.2273   5
  -8   2  -2 671.195 34.4379   3
  -8   2  -2 638.675 28.7005   5
  -8   2  -2 689.476 27.4007   2
  -8   2  -2 615.348 26.6841   5
  -8   2  -2 632.676 18.3361   4
  -8   2  -2 641.639 31.9714   3
   8  -2   2 590.645 25.8613   5
   8  -2   2 644.037 28.8509   2
   8  -2   2 635.599 26.8975   5
   8  -2   2 648.975 21.7077   4
  -9   2  -2 343.217 25.1749   5
  -9   2  -2 318.664 33.3634   2
  -9   2  -2 345.769 28.5627   5
  -9   2  -2 351.516 15.4817   4
  -9   2  -2 342.479 33.2032   3
  -9   2  -2 348.048 29.5115   3
   9  -2   2 360.910 27.8637   2
   9  -2   2 353.324 19.6587   4
   9  -2   2 314.462 24.6207   5
   9  -2   2 364.248 25.6348   5
 -10   2  -2 -11.223 16.8981   3
 -10   2  -2 8.15582 20.0220   3
 -10   2  -2 10.8641 15.5075   5
 -10   2  -2 10.4153 14.5744   2
 -10   2  -2 -15.980 16.0626   5
 -10   2  -2 21.4106 7.90909   4
  10  -2   2 37.5623 17.0961   5
  10  -2   2 -20.478 16.5277   2
  10  -2   2 16.1789 13.9120   5
  10  -2   2 -2.6661 11.4107   4
 -11   2  -2 199.477 16.5340   4
 -11   2  -2 232.008 26.7925   5
 -11   2  -2 212.217 27.9713   5
 -11   2  -2 256.376 31.5716   3
 -11   2  -2 220.192 22.9650   2
 -11   2  -2 213.332 27.7591   3
  11  -2   2 249.914 28.0228   5
  11  -2   2 191.709 17.8578   4
  11  -2   2 200.145 23.6287   5
  11  -2   2 122.736 26.4782   2
 -12   2  -2 19.8752 27.5479   5
 -12   2  -2 9.35840 23.4496   5
 -12   2  -2 20.8049 20.8163   2
 -12   2  -2 24.7412 11.8377   4
 -12   2  -2 24.9735 28.9796   3
 -12   2  -2 16.0479 31.5841   3
  12  -2   2 32.7363 24.7698   5
  12  -2   2 62.8790 23.4172   5
  12  -2   2 24.5173 15.9959   4
 -13   2  -2 30.2872 32.2288   3
 -13   2  -2 17.6503 27.0106   2
 -13   2  -2 100.711 52.1019   3
 -13   2  -2 11.7248 13.4197   4
  13  -2   2 -3.8292 28.3130   5
  13   1  -2 -23.022 31.4730   5
 -13  -1   2 -60.482 29.0568   2
 -13  -1   2 -37.165 38.0175   5
 -13  -1   2 37.2290 35.0426   5
 -13  -1   2 7.45115 25.3602   3
 -13  -1   2 16.3439 34.6596   3
  12   1  -2 59.3285 28.0797   5
  12   1  -2 49.4325 24.6223   5
 -12  -1   2 58.1026 39.5559   5
 -12  -1   2 85.5028 24.1103   2
 -12  -1   2 54.9519 23.5024   5
 -12  -1   2 29.6982 22.1385   3
 -12  -1   2 41.2012 26.5234   3
  11   1  -2 198.601 18.1979   4
  11   1  -2 224.146 28.1704   5
  11   1  -2 209.870 27.5206   5
  11   1  -2 163.304 27.0843   2
 -11  -1   2 227.454 30.7353   5
 -11  -1   2 170.993 22.2353   3
 -11  -1   2 188.284 26.8637   3
 -11  -1   2 172.475 22.8898   2
 -11  -1   2 325.298 37.5810   5
  10   1  -2 382.667 21.1919   4
  10   1  -2 414.149 32.1297   5
  10   1  -2 420.216 31.0128   2
  10   1  -2 377.778 28.5702   5
 -10  -1   2 354.821 29.4016   2
 -10  -1   2 363.999 30.1337   3
 -10  -1   2 388.523 31.8280   5
 -10  -1   2 553.667 47.7229   5
 -10  -1   2 402.899 31.6624   3
 -10  -1   2 397.283 20.5643   4
   9   1  -2 49.1454 12.3609   5
   9   1  -2 73.4481 10.6756   4
   9   1  -2 107.061 29.9986   5
   9   1  -2 81.7333 16.3419   2
  -9  -1   2 76.6774 16.7563   3
  -9  -1   2 80.0300 15.8716   3
  -9  -1   2 119.348 22.9128   5
  -9  -1   2 68.7673 16.5872   5
  -9  -1   2 80.0257 24.6059   2
  -9  -1   2 70.2781 10.1998   4
   8   1  -2 720.620 21.2935   4
   8   1  -2 724.186 28.2893   2
   8   1  -2 758.281 30.4800   5
   8   1  -2 718.828 28.4551   5
  -8  -1   2 736.563 31.0829   5
  -8  -1   2 681.054 27.6661   3
  -8  -1   2 685.654 26.7264   2
  -8  -1   2 720.795 21.0173   4
   7   1  -2 196.773 16.8938   5
   7   1  -2 189.026 16.6238   2
   7   1  -2 312.679 29.0845   5
   7   1  -2 191.142 11.8245   4
  -7  -1   2 194.920 11.6606   4
  -7  -1   2 208.157 16.4068   2
  -7  -1   2 197.615 18.9538   5
  -7  -1   2 184.507 17.5713   5
  -7  -1   2 175.273 16.2182   3
   6   1  -2 276.760 15.7507   2
   6   1  -2 248.738 11.1897   4
   6   1  -2 255.868 16.9015   5
  -6  -1   2 274.523 11.5644   4
  -6  -1   2 242.717 17.0323   5
  -6  -1   2 256.175 15.1633   2
  -6  -1   2 258.738 16.6969   5
  -6  -1   2 252.718 15.5161   3
   5   1  -2 270.401 10.5193   4
   5   1  -2 273.556 13.9339   2
   5   1  -2 260.754 14.4416   5
  -5  -1   2 257.875 14.9719   5
  -5  -1   2 275.306 13.8261   2
  -5  -1   2 268.922 13.9370   3
  -5  -1   2 275.674 15.6627   5
  -5  -1   2 257.101 10.5047   4
   4   1  -2 1288.53 29.3704   5
   4   1  -2 1260.45 28.1981   2
   4   1  -2 1329.02 25.2736   4
   4   1  -2 1273.71 28.4757   3
  -4  -1   2 1255.94 28.1690   2
  -4  -1   2 1282.21 27.7828   3
  -4  -1   2 1275.75 25.3867   4
  -4  -1   2 1246.23 29.8090   5
   3   1  -2 635.236 17.1376   5
   3   1  -2 608.434 15.8918   3
   3   1  -2 630.777 17.7451   5
   3   1  -2 621.030 16.3113   2
   3   1  -2 620.901 14.1035   4
  -3  -1   2 620.895 16.5309   2
  -3  -1   2 622.074 14.4408   4
  -3  -1   2 611.659 17.1565   5
  -3  -1   2 628.849 15.7347   3
   2   1  -2 218.243 8.75168   2
   2   1  -2 208.245 9.08261   5
   2   1  -2 201.195 9.78874   5
   2   1  -2 200.044 7.97041   3
   2   1  -2 204.424 7.26611   4
  -2  -1   2 207.757 9.39222   5
  -2  -1   2 219.860 9.10835   2
  -2  -1   2 229.917 8.62217   3
  -2  -1   2 209.576 9.30562   5
   1   1  -2 2597.15 45.2356   2
   1   1  -2 2632.18 45.0819   3
   1   1  -2 2640.42 45.6931   5
   1   1  -2 2631.28 45.4210   5
  -1  -1   2 2656.10 45.4464   2
  -1  -1   2 2653.30 45.5464   5
   0   1  -2 6039.07 98.4493   5
   0   1  -2 6103.52 99.1279   2
   0   1  -2 5986.84 98.3608   5
   0   1  -2 6127.73 99.2838   4
   0   1  -2 6344.84 100.201   3
   0  -1   2 6075.08 98.4727   5
   0  -1   2 6134.15 99.2232   4
   0  -1   2 6001.29 99.1337   2
   0  -1   2 5541.65 101.492   3
  -1   1  -2 375.374 10.9809   2
  -1   1  -2 371.647 11.9431   3
  -1   1  -2 375.590 9.44901   5
  -1   1  -2 388.134 10.2912   4
  -1   1  -2 373.847 9.23199   5
   1  -1   2 383.504 12.1024   3
   1  -1   2 373.164 9.45200   5
   1  -1   2 402.653 10.5216   4
  -2   1  -2 914.727 19.3425   5
  -2   1  -2 888.783 20.4037   2
  -2   1  -2 927.108 18.8951   5
  -2   1  -2 912.541 18.8991   4
  -2   1  -2 852.530 22.0397   3
   2  -1   2 894.303 20.5296   2
   2  -1   2 885.045 18.8741   5
   2  -1   2 922.301 19.0321   4
   2  -1   2 892.573 22.0577   3
  -3   1  -2 1191.99 28.8804   3
  -3   1  -2 1240.15 24.1394   4
  -3   1  -2 1181.92 26.3623   2
  -3   1  -2 1202.65 25.3203   5
  -3   1  -2 1203.22 25.9842   5
   3  -1   2 1209.42 26.9940   2
   3  -1   2 1206.85 25.5995   5
   3  -1   2 1233.04 24.5370   4
  -4   1  -2 893.413 26.0991   3
  -4   1  -2 959.978 20.4129   4
  -4   1  -2 945.452 22.8961   5
  -4   1  -2 927.395 23.6418   2
   4  -1   2 933.115 24.4154   2
   4  -1   2 933.084 21.0977   4
   4  -1   2 962.985 23.3734   5
   4  -1   2 946.340 23.1930   5
  -5   1  -2 20.2012 6.14249   5
  -5   1  -2 12.5567 6.73580   5
  -5   1  -2 20.7728 5.12306   4
  -5   1  -2 14.7582 7.36969   2
  -5   1  -2 7.69638 8.13572   3
   5  -1   2 11.5104 6.81883   5
   5  -1   2 8.86414 6.10074   5
   5  -1   2 5.52095 5.64250   4
   5  -1   2 16.1943 7.27944   2
  -6   1  -2 18.3621 8.84200   5
  -6   1  -2 13.3048 9.36932   3
  -6   1  -2 10.7722 7.80916   2
  -6   1  -2 10.7570 6.81435   5
  -6   1  -2 18.6605 5.29767   4
   6  -1   2 15.9559 6.68792   5
   6  -1   2 2.52194 7.89229   5
   6  -1   2 12.6664 6.11564   4
   6  -1   2 15.5328 8.68375   2
  -7   1  -2 62.6733 11.0350   2
  -7   1  -2 68.7447 13.9818   3
  -7   1  -2 65.5695 7.20149   4
  -7   1  -2 76.3996 12.9093   5
  -7   1  -2 55.7724 10.1516   5
   7  -1   2 54.7796 8.47918   4
   7  -1   2 49.0753 18.5021   2
   7  -1   2 69.8257 11.1223   5
   7  -1   2 74.2989 11.5434   5
  -8   1  -2 479.159 16.7951   4
  -8   1  -2 531.311 24.3971   2
  -8   1  -2 482.650 27.4011   5
  -8   1  -2 531.991 29.8937   3
  -8   1  -2 510.397 24.1902   5
  -8   1  -2 514.067 28.4241   3
   8  -1   2 470.959 19.4392   4
   8  -1   2 485.029 24.6075   5
   8  -1   2 510.481 24.2121   5
   8  -1   2 473.583 26.5833   2
  -9   1  -2 232.132 22.7175   2
  -9   1  -2 214.050 28.6832   3
  -9   1  -2 211.896 22.5069   5
  -9   1  -2 226.351 26.5228   3
  -9   1  -2 243.520 25.8635   5
  -9   1  -2 239.076 14.3386   4
   9  -1   2 187.880 21.6745   5
   9  -1   2 240.066 23.2261   5
   9  -1   2 231.397 25.9150   2
   9  -1   2 249.044 17.8255   4
 -10   1  -2 54.1064 17.1433   5
 -10   1  -2 43.5748 20.7924   3
 -10   1  -2 55.9551 19.0161   5
 -10   1  -2 69.6953 16.6955   2
 -10   1  -2 58.6323 18.7856   3
 -10   1  -2 55.6520 9.95246   4
  10  -1   2 54.4864 16.4419   5
  10  -1   2 48.7445 18.4382   2
  10  -1   2 63.6287 12.9748   4
  10  -1   2 56.7706 16.5973   5
 -11   1  -2 19.2583 20.1364   5
 -11   1  -2 47.2357 11.2738   4
 -11   1  -2 23.8646 20.1123   3
 -11   1  -2 43.5877 19.4461   2
 -11   1  -2 58.2791 23.7424   3
 -11   1  -2 35.5629 19.0483   5
  11  -1   2 8.01438 15.4163   4
  11  -1   2 25.1064 17.9571   5
  11  -1   2 -2.5727 14.0871   5
  11  -1   2 -5.8860 22.8780   2
 -12   1  -2 99.3949 14.0260   4
 -12   1  -2 78.2341 29.7438   3
 -12   1  -2 72.7928 27.1437   3
 -12   1  -2 101.317 25.9710   5
 -12   1  -2 62.7645 22.2625   2
 -12   1  -2 64.3877 30.6752   5
  12  -1   2 62.4899 23.9096   5
  12  -1   2 125.491 19.7355   4
  12  -1   2 63.9420 22.5893   5
 -13   1  -2 37.0571 31.2407   5
 -13   1  -2 78.4014 32.0053   3
 -13   1  -2 30.2413 27.0987   2
 -13   1  -2 109.921 40.6250   3
 -13   1  -2 32.6389 27.7754   5
 -13   1  -2 47.0451 16.1169   4
  13  -1   2 26.8020 27.6025   5
  13   0  -2 -32.317 30.7172   5
 -13   0   2 -8.1641 27.5949   2
 -13   0   2 -30.486 27.6364   3
 -13   0   2 -71.665 32.2574   5
 -13   0   2 30.2557 37.1264   3
 -13   0   2 -53.890 35.9310   5
  12   0  -2 18.6334 23.9250   5
  12   0  -2 30.9199 16.2280   4
  12   0  -2 44.4724 20.3079   5
 -12   0   2 51.8994 22.6423   5
 -12   0   2 86.6188 24.4750   2
 -12   0   2 45.1372 23.7930   3
 -12   0   2 0.93939 27.4325   3
 -12   0   2 30.3574 26.8095   5
  11   0  -2 20.6486 22.7214   2
  11   0  -2 53.5963 13.6424   4
  11   0  -2 59.8972 21.5374   5
  11   0  -2 96.3722 24.3551   5
 -11   0   2 46.0238 22.5216   5
 -11   0   2 60.8774 23.9366   3
 -11   0   2 43.6093 20.2116   3
 -11   0   2 68.0972 23.8955   5
 -11   0   2 46.5960 19.5817   2
  10   0  -2 69.5030 19.0079   5
  10   0  -2 48.2076 18.5074   2
  10   0  -2 77.5056 18.1366   5
  10   0  -2 44.4015 11.2770   4
 -10   0   2 70.8286 16.7219   2
 -10   0   2 59.3192 19.5917   5
 -10   0   2 63.8333 19.3732   5
 -10   0   2 55.1104 20.1241   3
 -10   0   2 69.0288 18.4398   3
 -10   0   2 57.5428 10.1204   4
   9   0  -2 87.4522 16.6243   2
   9   0  -2 64.9636 13.5977   5
   9   0  -2 78.7663 10.4988   4
   9   0  -2 78.3963 17.5378   5
  -9   0   2 59.8371 21.4779   5
  -9   0   2 88.1081 16.7763   3
  -9   0   2 93.4578 17.7549   5
  -9   0   2 82.1946 9.66451   4
   8   0  -2 80.7513 14.5118   5
   8   0  -2 73.7438 13.6619   2
   8   0  -2 95.7281 9.23464   4
   8   0  -2 88.4453 11.9817   5
  -8   0   2 119.494 15.4918   3
  -8   0   2 105.413 16.7550   5
  -8   0   2 117.558 10.9255   4
  -8   0   2 104.994 14.3863   5
  -8   0   2 90.3884 12.6069   2
   7   0  -2 247.348 18.8243   2
   7   0  -2 307.755 19.9107   5
   7   0  -2 257.603 12.1160   4
  -7   0   2 265.020 19.7803   3
  -7   0   2 270.383 17.4662   2
  -7   0   2 269.837 18.8556   5
  -7   0   2 294.019 20.1448   5
  -7   0   2 268.365 11.6830   4
   6   0  -2 275.150 16.0651   2
   6   0  -2 273.074 16.0668   5
   6   0  -2 270.744 10.9605   4
   6   0  -2 277.406 17.0914   5
  -6   0   2 289.822 17.7960   5
  -6   0   2 268.576 16.9282   3
  -6   0   2 287.902 15.4753   2
  -6   0   2 258.441 10.5200   4
  -6   0   2 262.084 16.4926   5
   5   0  -2 971.762 20.2054   4
   5   0  -2 925.079 25.6921   5
   5   0  -2 979.033 26.8353   5
   5   0  -2 966.432 25.5234   2
  -5   0   2 966.756 20.2042   4
  -5   0   2 975.485 24.7665   2
  -5   0   2 911.872 26.4701   5
  -5   0   2 950.003 26.0285   5
  -5   0   2 997.447 26.5003   3
   4   0  -2 502.658 12.0813   4
   4   0  -2 488.825 17.6754   3
   4   0  -2 486.771 17.1613   5
   4   0  -2 510.137 16.3369   2
  -4   0   2 525.654 15.9529   2
  -4   0   2 615.095 20.7080   5
  -4   0   2 478.870 16.5945   5
  -4   0   2 511.354 17.1690   3
  -4   0   2 485.105 12.0675   4
   3   0  -2 3972.10 71.1439   5
   3   0  -2 4080.96 69.8773   2
   3   0  -2 3971.18 70.6080   5
   3   0  -2 4036.81 71.1083   3
   3   0  -2 4065.49 66.4609   4
  -3   0   2 4026.12 66.6591   4
  -3   0   2 4046.12 70.9370   5
  -3   0   2 4004.33 69.5519   2
  -3   0   2 3960.95 70.5897   3
  -3   0   2 3928.48 70.9470   5
   2   0  -2 6053.77 100.992   5
   2   0  -2 6025.03 98.0133   4
   2   0  -2 6115.05 101.537   5
   2   0  -2 6257.27 101.297   3
   2   0  -2 5979.70 100.184   2
  -2   0   2 5923.19 100.884   3
  -2   0   2 6086.00 101.411   5
  -2   0   2 5860.55 99.9846   2
  -2   0   2 6057.30 101.320   5
   1   0  -2 6733.00 108.622   2
   1   0  -2 6797.05 109.500   3
   1   0  -2 6751.05 109.468   5
   1   0  -2 6648.64 109.630   5
   1   0  -2 6432.62 108.253   4
  -1   0   2 6611.44 109.440   3
  -1   0   2 6738.56 109.636   5
   0   0   2 665.061 16.4585   5
  -1   0  -2 6076.54 98.1072   4
  -1   0  -2 5910.50 98.4806   5
  -1   0  -2 5690.22 99.3936   2
  -1   0  -2 6013.17 98.3906   5
  -1   0  -2 6030.86 99.5970   3
   1   0   2 6209.81 99.7924   3
   1   0   2 6038.22 98.1154   4
   1   0   2 5993.54 98.1452   2
  -2   0  -2 931.549 18.3108   4
  -2   0  -2 895.757 19.5764   5
  -2   0  -2 887.389 19.0014   5
  -2   0  -2 892.421 20.8406   3
  -2   0  -2 882.420 19.1705   2
   2   0   2 879.423 20.6906   3
   2   0   2 878.226 19.1545   5
   2   0   2 889.181 19.3738   5
   2   0   2 910.524 18.4127   4
   2   0   2 894.272 19.3038   2
  -3   0  -2 1237.80 27.1631   5
  -3   0  -2 1259.60 24.6624   4
  -3   0  -2 1274.75 28.5160   3
  -3   0  -2 1282.02 26.7122   5
  -3   0  -2 1270.67 26.5380   2
   3   0   2 1253.86 26.8865   2
   3   0   2 1279.49 28.1927   3
   3   0   2 1270.31 26.7851   5
   3   0   2 1286.77 27.0099   5
   3   0   2 1274.16 25.1548   4
  -4   0  -2 0.32758 5.60788   5
  -4   0  -2 -1.9471 5.19670   5
  -4   0  -2 1.28485 5.00048   2
  -4   0  -2 7.75612 6.27813   3
  -4   0  -2 -2.5133 3.78139   4
   4   0   2 2.94839 5.29591   5
   4   0   2 0.53211 4.76155   5
   4   0   2 -3.9151 5.04985   2
   4   0   2 1.49046 4.40699   4
  -5   0  -2 2200.93 47.3632   5
  -5   0  -2 2313.46 49.1102   3
  -5   0  -2 2259.54 46.6381   5
  -5   0  -2 2314.18 42.2737   4
  -5   0  -2 2280.46 46.1083   2
   5   0   2 2302.16 47.1450   5
   5   0   2 2318.99 47.1918   2
   5   0   2 2270.48 47.2232   5
   5   0   2 2339.99 43.4712   4
  -6   0  -2 46.2699 8.52960   2
  -6   0  -2 64.0583 6.71649   4
  -6   0  -2 49.3568 8.91338   5
  -6   0  -2 50.3516 8.04781   5
  -6   0  -2 46.7755 10.1203   3
   6   0   2 59.6925 8.27833   5
   6   0   2 57.9514 7.81481   4
   6   0   2 61.9732 9.40282   5
   6   0   2 75.0589 10.1582   2
  -7   0  -2 598.969 17.6104   4
  -7   0  -2 613.016 23.5133   5
  -7   0  -2 600.343 26.1762   3
  -7   0  -2 611.448 24.7045   5
  -7   0  -2 585.486 22.5311   2
   7   0   2 608.353 24.3008   2
   7   0   2 594.687 23.5340   5
   7   0   2 613.230 19.5398   4
  -8   0  -2 193.210 21.0540   3
  -8   0  -2 208.322 22.5785   3
  -8   0  -2 194.142 20.1630   5
  -8   0  -2 202.929 12.9918   4
  -8   0  -2 204.693 18.8209   5
  -8   0  -2 208.669 18.6826   2
   8   0   2 195.534 15.0996   4
   8   0   2 196.791 18.3041   2
   8   0   2 206.171 19.7165   5
   8   0   2 207.464 19.1409   5
  -9   0  -2 121.779 13.3042   4
  -9   0  -2 107.281 16.6316   5
  -9   0  -2 144.983 17.9229   5
  -9   0  -2 114.995 17.9810   3
  -9   0  -2 142.092 16.5164   2
   9   0   2 159.773 18.0612   5
   9   0   2 128.882 12.9182   4
   9   0   2 105.985 16.7547   2
   9   0   2 103.139 15.1819   5
 -10   0  -2 78.1160 16.7718   5
 -10   0  -2 61.3207 17.6775   3
 -10   0  -2 77.3538 19.4423   3
 -10   0  -2 46.4918 20.0107   5
 -10   0  -2 73.4353 17.0364   2
 -10   0  -2 60.7475 10.5684   4
  10   0   2 42.3255 18.0198   2
  10   0   2 102.218 18.7888   5
  10   0   2 72.0298 13.3553   4
  10   0   2 73.6367 18.6218   5
 -11   0  -2 39.9880 19.6377   5
 -11   0  -2 19.3475 21.2124   5
 -11   0  -2 11.3357 17.9157   2
 -11   0  -2 -9.8519 21.4553   3
 -11   0  -2 19.0853 11.1605   4
 -11   0  -2 15.7978 18.8968   3
  11   0   2 42.0514 14.6919   4
  11   0   2 23.8629 15.4645   5
  11   0   2 48.5201 19.7046   5
  11   0   2 23.2635 21.5996   2
 -12   0  -2 -14.169 22.9233   3
 -12   0  -2 10.3308 25.0939   5
 -12   0  -2 -22.999 21.2381   5
 -12   0  -2 -2.3840 25.9101   3
 -12   0  -2 -15.727 12.2428   4
 -12   0  -2 -14.371 19.1332   2
  12   0   2 -19.066 17.4675   4
  12   0   2 -5.5062 22.4894   5
  12   0   2 2.91993 21.5453   5
 -13   0  -2 66.6020 29.4028   3
 -13   0  -2 21.1622 37.7452   5
 -13   0  -2 23.4906 28.6598   5
 -13   0  -2 34.4168 16.1420   4
 -13   0  -2 90.7364 36.9897   3
 -13   0  -2 7.77006 25.0779   2
  13   0   2 18.6301 21.4940   4
  13   0   2 50.9094 29.1059   5
  13  -1  -2 9.53357 27.0909   5
 -13   1   2 -61.642 29.2502   3
 -13   1   2 -34.881 26.7482   5
 -13   1   2 55.1842 36.8836   5
 -13   1   2 2.44130 39.4993   3
 -13   1   2 66.5592 28.8103   2
  12  -1  -2 85.6651 16.3229   4
  12  -1  -2 90.2125 28.2760   5
  12  -1  -2 120.989 25.5889   5
 -12   1   2 153.185 33.0495   5
 -12   1   2 95.4344 27.1911   3
 -12   1   2 102.204 30.5240   5
 -12   1   2 127.871 32.9012   3
 -12   1   2 68.4641 23.0794   2
  11  -1  -2 10.5147 19.0129   5
  11  -1  -2 39.9607 24.0776   2
  11  -1  -2 39.0406 19.9285   5
  11  -1  -2 -19.221 12.1912   4
 -11   1   2 8.81915 16.7653   2
 -11   1   2 3.92041 22.6100   5
 -11   1   2 58.2478 20.6117   5
 -11   1   2 6.39111 23.8348   3
 -11   1   2 -1.7951 21.2098   3
  10  -1  -2 71.9001 11.0063   4
  10  -1  -2 53.9064 17.7585   2
  10  -1  -2 75.8803 18.5608   5
  10  -1  -2 57.4521 12.9355   5
 -10   1   2 49.3053 20.7449   5
 -10   1   2 82.5832 23.0241   3
 -10   1   2 81.3756 17.9747   5
 -10   1   2 77.8859 19.6546   3
 -10   1   2 62.8305 16.2562   2
   9  -1  -2 62.4136 16.2923   2
   9  -1  -2 96.5829 17.1995   5
   9  -1  -2 73.2644 17.1145   5
   9  -1  -2 69.4740 9.57543   4
  -9   1   2 30.1533 17.5396   3
  -9   1   2 76.7196 16.5707   2
  -9   1   2 72.0416 8.81064   4
  -9   1   2 61.4466 17.4823   5
  -9   1   2 88.4329 17.3765   3
  -9   1   2 72.5180 16.8241   5
   8  -1  -2 2.08611 11.4011   5
   8  -1  -2 13.8132 12.0442   2
   8  -1  -2 -5.4878 10.4760   5
   8  -1  -2 5.16767 6.46429   4
  -8   1   2 1.02568 9.98621   5
  -8   1   2 10.7093 10.0116   2
  -8   1   2 12.8189 12.7918   3
  -8   1   2 -2.4269 12.3109   5
  -8   1   2 6.82553 5.97627   4
   7  -1  -2 2.06618 8.79155   5
   7  -1  -2 -0.8652 9.63638   5
   7  -1  -2 -4.0287 5.27617   4
   7  -1  -2 -0.9413 9.30350   2
  -7   1   2 4.03475 8.65234   5
  -7   1   2 -2.1117 9.86659   5
  -7   1   2 2.10436 4.78112   4
  -7   1   2 -0.2200 9.89038   3
  -7   1   2 -2.7963 8.59940   2
   6  -1  -2 157.113 8.76313   4
   6  -1  -2 164.667 14.8745   2
   6  -1  -2 157.596 14.8135   5
   6  -1  -2 129.972 13.3898   5
  -6   1   2 151.321 15.1061   5
  -6   1   2 157.703 7.92771   4
  -6   1   2 160.788 14.4529   5
  -6   1   2 158.672 16.2037   3
  -6   1   2 163.749 14.0670   2
   5  -1  -2 413.480 11.0297   4
   5  -1  -2 387.813 16.7658   2
  -5   1   2 417.958 17.0883   5
  -5   1   2 411.312 10.4995   4
  -5   1   2 395.612 18.6845   3
  -5   1   2 398.821 15.9641   2
  -5   1   2 408.428 17.5616   5
   4  -1  -2 2163.98 43.2751   5
   4  -1  -2 2182.94 43.2780   2
   4  -1  -2 2186.38 44.2767   5
   4  -1  -2 2235.49 37.6068   4
  -4   1   2 2210.00 42.7436   2
  -4   1   2 2113.90 43.8605   5
  -4   1   2 2205.25 44.1053   5
  -4   1   2 2216.45 45.7600   3
  -4   1   2 2224.98 37.4804   4
   3  -1  -2 78.9128 8.71442   5
   3  -1  -2 90.3100 8.26067   5
   3  -1  -2 103.093 10.2502   3
   3  -1  -2 89.0428 8.33595   2
   3  -1  -2 92.4266 4.09034   4
  -3   1   2 94.0379 7.91444   2
  -3   1   2 124.497 13.3636   5
  -3   1   2 85.3116 4.19093   4
  -3   1   2 75.9732 9.84789   3
  -3   1   2 85.0346 8.53593   5
   2  -1  -2 112.322 8.29241   5
   2  -1  -2 129.801 7.45659   2
   2  -1  -2 113.202 9.38168   3
   2  -1  -2 125.902 7.54916   5
  -2   1   2 134.121 7.16421   2
  -2   1   2 115.618 7.64332   5
  -2   1   2 131.035 8.02232   5
  -2   1   2 122.252 9.29051   3
   1  -1  -2 40.0461 4.31199   5
   1  -1  -2 38.5804 3.93931   2
   1  -1  -2 42.8200 4.89311   3
  -1   1   2 36.2669 3.88415   2
  -1   1   2 32.0073 4.31447   3
  -1   1   2 39.0343 4.32105   5
  -1   1   2 34.2791 2.97764   4
  -1   1   2 35.4266 3.86495   5
   0  -1  -2 5873.12 93.1201   4
   0   1   2 5662.54 94.3271   4
   0   1   2 5714.18 94.3767   5
  -1  -1  -2 170.609 4.81521   2
  -1  -1  -2 159.756 6.46345   5
  -1  -1  -2 178.503 5.83381   4
  -1  -1  -2 177.657 6.70879   3
  -1  -1  -2 156.895 7.41925   5
   1   1   2 165.849 6.59857   5
   1   1   2 164.029 5.76969   4
   1   1   2 164.282 4.89189   2
   1   1   2 166.398 6.28116   5
  -2  -1  -2 280.049 8.70694   2
  -2  -1  -2 267.652 10.2971   5
  -2  -1  -2 279.525 8.82339   4
  -2  -1  -2 258.372 10.2437   3
   2   1   2 258.869 11.7220   5
   2   1   2 277.653 9.15342   2
   2   1   2 262.411 8.92577   4
   2   1   2 264.625 9.96953   3
  -3  -1  -2 0.70781 4.33937   5
  -3  -1  -2 1.97011 3.40563   4
  -3  -1  -2 3.84078 4.09304   2
  -3  -1  -2 -1.5638 4.73052   5
  -3  -1  -2 7.09805 5.05734   3
   3   1   2 5.44844 6.24909   5
   3   1   2 0.86657 6.15588   5
   3   1   2 6.14184 4.46488   2
   3   1   2 2.89357 3.75359   4
   3   1   2 3.77655 4.51397   3
  -4  -1  -2 307.415 12.1372   2
  -4  -1  -2 315.098 10.7309   4
  -4  -1  -2 317.242 13.0799   5
  -4  -1  -2 380.531 16.9797   5
  -4  -1  -2 322.853 13.8574   3
   4   1   2 299.986 11.3287   4
   4   1   2 303.391 12.8836   2
   4   1   2 305.417 13.7196   5
  -5  -1  -2 68.8011 9.14015   3
  -5  -1  -2 77.0811 8.11119   4
  -5  -1  -2 64.9926 9.65975   5
  -5  -1  -2 63.1001 8.34300   5
  -5  -1  -2 71.4878 8.02119   2
   5   1   2 75.9107 8.85607   2
   5   1   2 106.365 12.9922   5
   5   1   2 80.6328 7.39371   4
   5   1   2 129.668 14.2751   5
  -6  -1  -2 1310.72 34.9424   5
  -6  -1  -2 1372.83 32.2480   2
  -6  -1  -2 1375.25 28.9079   4
  -6  -1  -2 1326.49 34.5214   3
  -6  -1  -2 1352.65 33.8257   5
   6   1   2 1367.15 29.9850   4
   6   1   2 1333.10 34.2780   5
   6   1   2 1397.31 33.9911   2
  -7  -1  -2 85.0819 8.36227   4
  -7  -1  -2 71.3265 10.4320   2
  -7  -1  -2 71.0853 12.1192   5
  -7  -1  -2 56.0314 9.29546   5
  -7  -1  -2 64.9496 11.8659   3
   7   1   2 78.0125 9.08410   4
   7   1   2 66.8341 10.8042   5
   7   1   2 146.846 24.6345   5
   7   1   2 90.4337 12.0842   2
  -8  -1  -2 512.938 22.8115   2
  -8  -1  -2 490.854 25.3608   3
  -8  -1  -2 500.226 24.0602   5
  -8  -1  -2 503.175 17.8766   4
  -8  -1  -2 506.997 25.0120   3
  -8  -1  -2 481.137 25.4978   5
   8   1   2 506.528 24.0941   5
   8   1   2 486.408 25.3546   2
   8   1   2 469.139 19.6827   4
   8   1   2 493.095 24.7744   5
  -9  -1  -2 91.3444 14.3151   2
  -9  -1  -2 120.442 25.6091   5
  -9  -1  -2 86.9223 10.0494   4
  -9  -1  -2 68.3086 16.2319   3
  -9  -1  -2 61.4408 15.0607   3
  -9  -1  -2 72.5340 14.6239   5
   9   1   2 88.0346 16.7951   2
   9   1   2 64.6469 15.7485   5
   9   1   2 66.1176 11.5976   4
   9   1   2 42.6332 11.2569   5
 -10  -1  -2 420.077 32.8131   3
 -10  -1  -2 408.137 29.5082   5
 -10  -1  -2 469.015 34.6396   5
 -10  -1  -2 429.019 20.4392   4
 -10  -1  -2 436.878 28.4656   2
 -10  -1  -2 430.538 30.2141   3
  10   1   2 466.427 29.7389   5
  10   1   2 444.743 31.3511   2
  10   1   2 407.493 30.0688   5
  10   1   2 465.455 24.5366   4
 -11  -1  -2 -11.893 18.5027   3
 -11  -1  -2 3.73471 11.3391   4
 -11  -1  -2 5.28982 20.1650   3
 -11  -1  -2 1.22088 20.7959   5
 -11  -1  -2 10.8066 17.4004   2
 -11  -1  -2 22.3778 18.2146   5
  11   1   2 -0.8779 14.4982   4
  11   1   2 -3.9227 19.9328   2
  11   1   2 -9.2997 18.5951   5
  11   1   2 19.3898 19.2120   5
 -12  -1  -2 253.282 32.6472   5
 -12  -1  -2 261.861 26.7851   2
 -12  -1  -2 280.424 36.1348   3
 -12  -1  -2 285.399 29.7092   5
 -12  -1  -2 344.892 23.4783   4
 -12  -1  -2 282.906 32.5828   3
  12   1   2 273.944 30.7710   4
  12   1   2 239.319 27.6048   5
 -13  -1  -2 122.827 29.5855   3
 -13  -1  -2 82.7930 33.7974   3
 -13  -1  -2 107.375 32.7050   5
 -13  -1  -2 114.570 25.9656   2
 -13  -1  -2 76.6901 17.8500   4
 -13  -1  -2 126.259 39.8929   5
  13   1   2 118.960 33.8269   5
  13   1   2 115.118 23.3218   4
  13   1   2 141.672 30.6083   5
  13  -2  -2 185.185 33.2067   5
 -13   2   2 137.890 35.8420   3
 -13   2   2 82.9920 29.0011   2
  12  -2  -2 0.99586 17.1844   5
  12  -2  -2 12.2601 24.2682   5
 -12   2   2 0.91469 27.1602   5
 -12   2   2 10.9800 27.3984   5
 -12   2   2 30.5789 33.2119   3
 -12   2   2 -35.279 25.2204   3
 -12   2   2 0.62495 21.5367   2
  11  -2  -2 172.873 29.2707   2
  11  -2  -2 223.065 29.7577   5
  11  -2  -2 195.880 17.8769   4
  11  -2  -2 223.171 26.3440   5
 -11   2   2 196.115 27.8856   5
 -11   2   2 251.709 31.9672   5
 -11   2   2 239.336 32.4297   3
 -11   2   2 230.435 24.9441   2
 -11   2   2 224.913 28.9599   3
  10  -2  -2 20.8695 15.6008   5
  10  -2  -2 76.4282 20.7414   2
  10  -2  -2 56.2874 10.2264   4
  10  -2  -2 63.8682 19.1199   5
 -10   2   2 37.0487 19.4503   5
 -10   2   2 74.7104 22.0004   3
 -10   2   2 17.1268 21.8955   3
 -10   2   2 34.6948 17.2776   2
 -10   2   2 48.4580 20.6626   5
   9  -2  -2 135.419 18.0554   5
   9  -2  -2 98.6918 18.2048   2
   9  -2  -2 92.7342 16.7708   5
   9  -2  -2 140.686 13.4021   4
  -9   2   2 136.491 20.5199   3
  -9   2   2 121.411 17.3298   5
  -9   2   2 104.108 15.8912   2
  -9   2   2 123.387 10.7544   4
  -9   2   2 110.124 18.7632   5
   8  -2  -2 12.5769 10.6402   5
   8  -2  -2 10.6024 12.7650   2
   8  -2  -2 7.74725 11.2686   5
   8  -2  -2 19.7187 7.02638   4
  -8   2   2 14.7565 11.1800   2
  -8   2   2 13.0214 13.3083   3
  -8   2   2 11.8878 12.5627   5
  -8   2   2 13.8620 5.25957   4
  -8   2   2 9.55277 12.3792   5
   7  -2  -2 445.335 22.5513   5
   7  -2  -2 419.423 20.7946   5
   7  -2  -2 437.492 22.8698   2
   7  -2  -2 446.736 13.6269   4
  -7   2   2 428.720 22.8165   5
  -7   2   2 449.734 20.9410   2
  -7   2   2 448.246 11.8256   4
  -7   2   2 449.878 22.0047   5
  -7   2   2 458.374 25.7298   3
   6  -2  -2 -4.0753 8.05051   2
   6  -2  -2 -0.2001 7.75965   5
   6  -2  -2 1.00056 8.30215   5
   6  -2  -2 8.98514 4.45227   4
  -6   2   2 1.26906 9.11341   3
  -6   2   2 2.37729 7.51211   2
  -6   2   2 6.89406 8.19198   5
  -6   2   2 5.57167 3.51802   4
  -6   2   2 5.28332 8.21799   5
   5  -2  -2 238.008 7.94530   4
   5  -2  -2 240.923 14.2373   5
   5  -2  -2 228.180 13.3806   5
   5  -2  -2 228.403 14.6525   2
  -5   2   2 236.223 16.6016   3
  -5   2   2 224.020 13.6273   2
  -5   2   2 226.212 14.3845   5
  -5   2   2 209.404 13.8674   5
   4  -2  -2 45.3069 7.06987   5
   4  -2  -2 36.4667 7.36875   2
   4  -2  -2 44.0283 7.11888   5
  -4   2   2 32.0741 7.80461   3
  -4   2   2 35.3529 6.57715   2
  -4   2   2 40.5629 7.67018   5
  -4   2   2 30.8742 6.80750   5
   3  -2  -2 434.994 14.2656   5
   3  -2  -2 452.786 14.5233   2
   3  -2  -2 422.752 16.8576   3
  -3   2   2 441.167 13.6647   2
  -3   2   2 446.953 13.9193   5
  -3   2   2 427.353 16.8533   3
  -3   2   2 436.500 14.0102   5
   2  -2  -2 612.026 17.9864   3
   2  -2  -2 589.986 14.9019   2
   2  -2  -2 577.285 14.8100   5
  -2   2   2 590.117 14.3364   2
  -2   2   2 567.410 14.7216   5
  -2   2   2 592.662 17.8309   3
  -2   2   2 548.353 14.3522   5
   1  -2  -2 4573.84 78.6502   3
   1  -2  -2 4598.40 73.3073   4
   1  -2  -2 4474.34 75.9041   5
   1  -2  -2 4589.41 75.2668   2
  -1   2   2 4532.62 75.8657   5
  -1   2   2 4489.76 73.3290   4
  -1   2   2 4487.22 78.2933   3
  -1   2   2 4617.09 74.9776   2
  -1   2   2 4524.35 75.7512   5
   0  -2  -2 82.1858 3.58518   2
   0  -2  -2 81.5512 5.42013   5
   0  -2  -2 89.2148 6.61073   3
   0  -2  -2 88.7871 4.50193   4
   0   2   2 92.1921 4.51881   4
   0   2   2 89.3021 5.63250   5
   0   2   2 88.0932 5.51802   5
   0   2   2 97.1192 6.42185   3
[truncated: 2,630,062 more chars]
