# Supplementary material
Source: MDPI journal article supplement (https://www.mdpi.com/2304-6740/7/10/117)
Supplement: s1 [file s1 › inorganics-584457-Supplementary Materials/CIF and CIFcheck files/K(18c6)Cr1.cif]

####################################################################### 
# 
# This file contains crystal structure data downloaded from the 
# Cambridge Structural Database (CSD) hosted by the Cambridge 
# Crystallographic Data Centre (CCDC).
# 
# Full information about CCDC data access policies and citation 
# guidelines are available at http://www.ccdc.cam.ac.uk/access/V1 
# 
# Audit and citation data items may have been added by the CCDC. 
# Please retain this information to preserve the provenance of 
# this file and to allow appropriate attribution of the data. 
# 
#######################################################################

data_k(18c6)cr5
_database_code_depnum_ccdc_archive 'CCDC 1918208'
loop_
_audit_author_name
_audit_author_address
'Igor Mueller'
;Philipps University Marburg
Germany
;
_audit_update_record             
;
2019-05-23 deposited with the CCDC.	2019-08-14 downloaded from the CCDC.
;
_audit_creation_date             2019-05-23
_audit_creation_method           
;
Olex2 1.2-alpha
(compiled 2018.07.26 svn.r3523 for OlexSys, GUI svn.r5532)
;
_shelx_SHELXL_version_number     2014/7
_audit_contact_author_address    Philipps-University
_audit_contact_author_email      gunnar.werncke@chemie.uni-marburg.de
_audit_contact_author_name       C.
_audit_contact_author_phone      +4964212825637
_publ_contact_author_id_orcid    299638391
_publ_section_references         
;
Dolomanov, O.V., Bourhis, L.J., Gildea, R.J, Howard, J.A.K. & Puschmann, H.
 (2009), J. Appl. Cryst. 42, 339-341.

Sheldrick, G.M. (2008). Acta Cryst. A64, 112-122.
;
_chemical_name_common            ?
_chemical_name_systematic        ?
_chemical_formula_moiety         'C22 H44 Cr N4 Si4, C20 H40 K O8'
_chemical_formula_sum            'C42 H84 Cr K N4 O8 Si4'
_chemical_formula_weight         976.59
_chemical_melting_point          ?
loop_
_atom_type_symbol
_atom_type_description
_atom_type_scat_dispersion_real
_atom_type_scat_dispersion_imag
_atom_type_scat_source
C C 0.0033 0.0016 'International Tables Vol C Tables 4.2.6.8 and 6.1.1.4'
H H 0.0000 0.0000 'International Tables Vol C Tables 4.2.6.8 and 6.1.1.4'
Cr Cr 0.3209 0.6236 'International Tables Vol C Tables 4.2.6.8 and 6.1.1.4'
K K 0.2009 0.2494 'International Tables Vol C Tables 4.2.6.8 and 6.1.1.4'
N N 0.0061 0.0033 'International Tables Vol C Tables 4.2.6.8 and 6.1.1.4'
O O 0.0106 0.0060 'International Tables Vol C Tables 4.2.6.8 and 6.1.1.4'
Si Si 0.0817 0.0704 'International Tables Vol C Tables 4.2.6.8 and 6.1.1.4'

_shelx_space_group_comment       
;
The symmetry employed for this shelxl refinement is uniquely defined
by the following loop, which should always be used as a source of
symmetry information in preference to the above space-group names.
They are only intended as comments.
;
_space_group_crystal_system      triclinic
_space_group_IT_number           2
_space_group_name_H-M_alt        'P -1'
_space_group_name_Hall           '-P 1'
loop_
_space_group_symop_operation_xyz
'x, y, z'
'-x, -y, -z'

_cell_length_a                   11.6269(2)
_cell_length_b                   21.5546(4)
_cell_length_c                   21.8560(4)
_cell_angle_alpha                95.633(2)
_cell_angle_beta                 89.8920(10)
_cell_angle_gamma                90.377(2)
_cell_volume                     5450.83(17)
_cell_formula_units_Z            4
_cell_measurement_reflns_used    124112
_cell_measurement_temperature    100.0
_cell_measurement_theta_max      27.26
_cell_measurement_theta_min      1.75
_shelx_estimated_absorpt_T_max   0.919
_shelx_estimated_absorpt_T_min   0.867
_exptl_absorpt_coefficient_mu    0.422
_exptl_absorpt_correction_T_max  0.8481
_exptl_absorpt_correction_T_min  0.6245
_exptl_absorpt_correction_type   numerical
_exptl_absorpt_process_details   'X-Area X-Red 1.63.1.0 (STOE, 2016)'
_exptl_absorpt_special_details   ?
_exptl_crystal_colour            'clear dark green'
_exptl_crystal_colour_lustre     clear
_exptl_crystal_colour_modifier   dark
_exptl_crystal_colour_primary    green
_exptl_crystal_density_diffrn    1.190
_exptl_crystal_density_meas      ?
_exptl_crystal_density_method    ?
_exptl_crystal_description       block
_exptl_crystal_F_000             2108
_exptl_crystal_preparation       ?
_exptl_crystal_size_max          0.3494
_exptl_crystal_size_mid          0.2903
_exptl_crystal_size_min          0.2027
_exptl_transmission_factor_max   ?
_exptl_transmission_factor_min   ?
_diffrn_reflns_av_R_equivalents  0.0685
_diffrn_reflns_av_unetI/netI     0.0423
_diffrn_reflns_Laue_measured_fraction_full 1.000
_diffrn_reflns_Laue_measured_fraction_max 0.983
_diffrn_reflns_limit_h_max       14
_diffrn_reflns_limit_h_min       -14
_diffrn_reflns_limit_k_max       27
_diffrn_reflns_limit_k_min       -27
_diffrn_reflns_limit_l_max       27
_diffrn_reflns_limit_l_min       -27
_diffrn_reflns_number            106690
_diffrn_reflns_point_group_measured_fraction_full 1.000
_diffrn_reflns_point_group_measured_fraction_max 0.983
_diffrn_reflns_theta_full        25.242
_diffrn_reflns_theta_max         27.000
_diffrn_reflns_theta_min         1.752
_diffrn_ambient_temperature      100.0
_diffrn_detector_area_resol_mean ?
_diffrn_measured_fraction_theta_full 1.000
_diffrn_measured_fraction_theta_max 0.983
_diffrn_measurement_device_type  'STOE IPDS-2'
_diffrn_measurement_method       ?
_diffrn_radiation_type           MoK\a
_diffrn_radiation_wavelength     0.71073
_diffrn_source                   ?
_reflns_Friedel_coverage         0.000
_reflns_Friedel_fraction_full    .
_reflns_Friedel_fraction_max     .
_reflns_number_gt                20467
_reflns_number_total             23726
_reflns_special_details          
;
 Reflections were merged by SHELXL according to the crystal
 class for the calculation of statistics and refinement.
 
 _reflns_Friedel_fraction is defined as the number of unique
 Friedel pairs measured divided by the number that would be
 possible theoretically, ignoring centric projections and
 systematic absences.
;
_reflns_threshold_expression     'I > 2\s(I)'
_computing_cell_refinement       ?
_computing_data_collection       ?
_computing_data_reduction        ?
_computing_molecular_graphics    'Olex2 (Dolomanov et al., 2009)'
_computing_publication_material  'Olex2 (Dolomanov et al., 2009)'
_computing_structure_refinement  'XL (Sheldrick, 2008)'
_computing_structure_solution    'SIR2004 (Burla et al.,  2007)'
_refine_diff_density_max         1.019
_refine_diff_density_min         -0.541
_refine_diff_density_rms         0.140
_refine_ls_extinction_coef       .
_refine_ls_extinction_method     none
_refine_ls_goodness_of_fit_ref   1.075
_refine_ls_hydrogen_treatment    constr
_refine_ls_matrix_type           full
_refine_ls_number_parameters     1112
_refine_ls_number_reflns         23726
_refine_ls_number_restraints     0
_refine_ls_R_factor_all          0.0675
_refine_ls_R_factor_gt           0.0563
_refine_ls_restrained_S_all      1.075
_refine_ls_shift/su_max          0.001
_refine_ls_shift/su_mean         0.000
_refine_ls_structure_factor_coef Fsqd
_refine_ls_weighting_details     
'w=1/[\s^2^(Fo^2^)+(0.0409P)^2^+12.4696P] where P=(Fo^2^+2Fc^2^)/3'
_refine_ls_weighting_scheme      calc
_refine_ls_wR_factor_gt          0.1447
_refine_ls_wR_factor_ref         0.1502
_refine_special_details          
;
 Refined as a 2-component twin.
;
_olex2_refinement_description    
;
1. Twinned data refinement
 Scales: 0.6437(8)
 0.3563(8)
2. Fixed Uiso
 At 1.2 times of:
  All C(H) groups, All C(H,H) groups
 At 1.5 times of:
  All C(H,H,H) groups
3.a Secondary CH2 refined with riding coordinates:
 C01G(H01A,H01B), C01K(H01C,H01D), C01Q(H01E,H01F), C02G(H02A,H02B), C02K(H02C,
 H02D), C02N(H02E,H02F), C02W(H02G,H02H), C024(H02I,H02J), C028(H02K,H02L),
 C033(H03A,H03B), C01A(H01G,H01H), C01B(H01I,H01J), C01D(H01K,H01L), C01H(H01M,
 H01N), C01R(H01O,H01P), C02L(H02M,H02N), C015(H01Q,H01R), C018(H01S,H01T),
 C027(H02O,H02P), C029(H02Q,H02R), C01O(H01U,H01V), C01Y(H01W,H01X), C02A(H02S,
 H02T), C02P(H02U,H02V), C02T(H02W,H02X), C02V(H02Y,H), C03B(H03C,H03D),
 C03D(H03E,H03F), C023(H02Z,HA), C030(H03G,H03H), C01E(H01Y,HB), C01F(H01Z,HC),
 C01I(H01,HD), C01M(H0AA,HE), C02C(H02,HF), C02F(H1AA,HG), C02Z(H2AA,HH),
 C03A(H03I,H03J), C03C(H03K,H03L), C020(H3AA,HI)
3.b Aromatic/amide H refined with riding coordinates:
 C1A(H1A), C2A(H2A), C3A(H3A), C4A(H4A), C7A(H7A), C8A(H8A), C9A(H9A),
 C10A(H10A), C1B(H1B), C2B(H2B), C3B(H3B), C4B(H4B), C7B(H7B), C8B(H8B),
 C9B(H9B), C10B(H10B)
3.c Idealised Me refined as rotating group:
 C11A(H11A,H11B,H11C), C12A(H12A,H12B,H12C), C13A(H13A,H13B,H13C), C14A(H14A,
 H14B,H14C), C15A(H15A,H15B,H15C), C16A(H16A,H16B,H16C), C17A(H17A,H17B,H17C),
 C18A(H18A,H18B,H18C), C19A(H19A,H19B,H19C), C20A(H20A,H20B,H20C), C21A(H21A,
 H21B,H21C), C22A(H22A,H22B,H22C), C11B(H11D,H11E,H11F), C12B(H12D,H12E,H12F),
 C13B(H13D,H13E,H13F), C14B(H14D,H14E,H14F), C15B(H15D,H15E,H15F), C16B(H16D,
 H16E,H16F), C17B(H17D,H17E,H17F), C18B(H18D,H18E,H18F), C19B(H19D,H19E,H19F),
 C20B(H20D,H20E,H20F), C21B(H21D,H21E,H21F), C22B(H22D,H22E,H22F)
;
_atom_sites_solution_hydrogens   geom
_atom_sites_solution_primary     direct
_atom_sites_solution_secondary   ?
loop_
_atom_site_label
_atom_site_type_symbol
_atom_site_fract_x
_atom_site_fract_y
_atom_site_fract_z
_atom_site_U_iso_or_equiv
_atom_site_adp_type
_atom_site_occupancy
_atom_site_site_symmetry_order
_atom_site_calc_flag
_atom_site_refinement_flags_posn
_atom_site_refinement_flags_adp
_atom_site_refinement_flags_occupancy
_atom_site_disorder_assembly
_atom_site_disorder_group
Cr1A Cr 0.61521(5) 0.24910(3) 0.74074(3) 0.02647(14) Uani 1 1 d . . . . .
Si1A Si 0.52193(10) 0.13384(6) 0.80688(5) 0.0317(3) Uani 1 1 d . . . . .
Si2A Si 0.43884(11) 0.25600(6) 0.86339(5) 0.0343(3) Uani 1 1 d . . . . .
Si3A Si 0.38751(10) 0.24177(6) 0.65087(5) 0.0311(2) Uani 1 1 d . . . . .
Si4A Si 0.50852(11) 0.36463(6) 0.68204(6) 0.0319(3) Uani 1 1 d . . . . .
N1A N 0.7434(3) 0.25585(16) 0.67459(15) 0.0267(7) Uani 1 1 d . . . . .
N2A N 0.7651(3) 0.24274(17) 0.79083(17) 0.0302(8) Uani 1 1 d . . . . .
N3A N 0.5129(3) 0.21194(17) 0.80781(14) 0.0274(7) Uani 1 1 d . . . . .
N4A N 0.4936(3) 0.28668(16) 0.68580(15) 0.0266(7) Uani 1 1 d . . . . .
C1A C 0.7272(4) 0.2564(2) 0.61386(19) 0.0319(9) Uani 1 1 d . . . . .
H1A H 0.6504 0.2537 0.5990 0.038 Uiso 1 1 calc R . . . .
C2A C 0.8139(4) 0.2605(2) 0.57184(19) 0.0334(9) Uani 1 1 d . . . . .
H2A H 0.7970 0.2603 0.5293 0.040 Uiso 1 1 calc R . . . .
C3A C 0.9283(4) 0.2651(2) 0.5927(2) 0.0371(10) Uani 1 1 d . . . . .
H3A H 0.9900 0.2691 0.5648 0.044 Uiso 1 1 calc R . . . .
C4A C 0.9481(4) 0.2637(2) 0.6539(2) 0.0325(9) Uani 1 1 d . . . . .
H4A H 1.0248 0.2671 0.6688 0.039 Uiso 1 1 calc R . . . .
C5A C 0.8565(3) 0.25720(19) 0.69594(18) 0.0274(8) Uani 1 1 d . . . . .
C6A C 0.8686(3) 0.2514(2) 0.75961(19) 0.0266(8) Uani 1 1 d . . . . .
C7A C 0.9749(4) 0.2523(2) 0.7907(2) 0.0338(9) Uani 1 1 d . . . . .
H7A H 1.0441 0.2590 0.7691 0.041 Uiso 1 1 calc R . . . .
C8A C 0.9788(4) 0.2436(2) 0.8513(2) 0.0386(10) Uani 1 1 d . . . . .
H8A H 1.0504 0.2435 0.8721 0.046 Uiso 1 1 calc R . . . .
C9A C 0.8739(4) 0.2345(2) 0.8832(2) 0.0398(10) Uani 1 1 d . . . . .
H9A H 0.8739 0.2282 0.9256 0.048 Uiso 1 1 calc R . . . .
C10A C 0.7727(4) 0.2351(2) 0.8506(2) 0.0353(10) Uani 1 1 d . . . . .
H10A H 0.7030 0.2297 0.8723 0.042 Uiso 1 1 calc R . . . .
C11A C 0.5277(6) 0.2809(4) 0.9343(3) 0.072(2) Uani 1 1 d . . . . .
H11A H 0.5734 0.2455 0.9452 0.108 Uiso 1 1 calc GR . . . .
H11B H 0.4765 0.2947 0.9685 0.108 Uiso 1 1 calc GR . . . .
H11C H 0.5792 0.3152 0.9258 0.108 Uiso 1 1 calc GR . . . .
C12A C 0.3823(6) 0.3300(3) 0.8407(2) 0.0575(15) Uani 1 1 d . . . . .
H12A H 0.4418 0.3509 0.8182 0.086 Uiso 1 1 calc GR . . . .
H12B H 0.3603 0.3569 0.8776 0.086 Uiso 1 1 calc GR . . . .
H12C H 0.3149 0.3216 0.8143 0.086 Uiso 1 1 calc GR . . . .
C13A C 0.3108(5) 0.2140(3) 0.8937(3) 0.0609(16) Uani 1 1 d . . . . .
H13A H 0.2616 0.1980 0.8593 0.091 Uiso 1 1 calc GR . . . .
H13B H 0.2669 0.2431 0.9219 0.091 Uiso 1 1 calc GR . . . .
H13C H 0.3375 0.1793 0.9156 0.091 Uiso 1 1 calc GR . . . .
C14A C 0.5660(5) 0.1063(3) 0.8834(2) 0.0515(13) Uani 1 1 d . . . . .
H14A H 0.6393 0.1258 0.8965 0.077 Uiso 1 1 calc GR . . . .
H14B H 0.5745 0.0608 0.8787 0.077 Uiso 1 1 calc GR . . . .
H14C H 0.5068 0.1179 0.9143 0.077 Uiso 1 1 calc GR . . . .
C15A C 0.6349(4) 0.1014(2) 0.7504(2) 0.0441(12) Uani 1 1 d . . . . .
H15A H 0.6294 0.1220 0.7125 0.066 Uiso 1 1 calc GR . . . .
H15B H 0.6225 0.0564 0.7409 0.066 Uiso 1 1 calc GR . . . .
H15C H 0.7115 0.1088 0.7684 0.066 Uiso 1 1 calc GR . . . .
C16A C 0.3860(5) 0.0905(3) 0.7863(3) 0.0521(13) Uani 1 1 d . . . . .
H16A H 0.3264 0.1033 0.8166 0.078 Uiso 1 1 calc GR . . . .
H16B H 0.3993 0.0456 0.7861 0.078 Uiso 1 1 calc GR . . . .
H16C H 0.3608 0.0997 0.7454 0.078 Uiso 1 1 calc GR . . . .
C17A C 0.2632(4) 0.2280(3) 0.7038(2) 0.0453(12) Uani 1 1 d . . . . .
H17A H 0.2924 0.2119 0.7412 0.068 Uiso 1 1 calc GR . . . .
H17B H 0.2098 0.1975 0.6830 0.068 Uiso 1 1 calc GR . . . .
H17C H 0.2230 0.2673 0.7148 0.068 Uiso 1 1 calc GR . . . .
C18A C 0.4392(4) 0.1626(2) 0.6194(2) 0.0453(12) Uani 1 1 d . . . . .
H18A H 0.5070 0.1672 0.5935 0.068 Uiso 1 1 calc GR . . . .
H18B H 0.3781 0.1409 0.5949 0.068 Uiso 1 1 calc GR . . . .
H18C H 0.4596 0.1385 0.6535 0.068 Uiso 1 1 calc GR . . . .
C19A C 0.3203(5) 0.2742(3) 0.5830(3) 0.0573(15) Uani 1 1 d . . . . .
H19A H 0.2772 0.3119 0.5969 0.086 Uiso 1 1 calc GR . . . .
H19B H 0.2680 0.2431 0.5623 0.086 Uiso 1 1 calc GR . . . .
H19C H 0.3807 0.2845 0.5542 0.086 Uiso 1 1 calc GR . . . .
C20A C 0.3726(4) 0.4092(2) 0.6988(3) 0.0473(12) Uani 1 1 d . . . . .
H20A H 0.3089 0.3880 0.6759 0.071 Uiso 1 1 calc GR . . . .
H20B H 0.3816 0.4514 0.6863 0.071 Uiso 1 1 calc GR . . . .
H20C H 0.3561 0.4116 0.7429 0.071 Uiso 1 1 calc GR . . . .
C21A C 0.5550(5) 0.3892(3) 0.6047(3) 0.0499(13) Uani 1 1 d . . . . .
H21A H 0.6281 0.3692 0.5926 0.075 Uiso 1 1 calc GR . . . .
H21B H 0.5647 0.4345 0.6078 0.075 Uiso 1 1 calc GR . . . .
H21C H 0.4962 0.3764 0.5739 0.075 Uiso 1 1 calc GR . . . .
C22A C 0.6212(5) 0.3984(2) 0.7366(3) 0.0475(12) Uani 1 1 d . . . . .
H22A H 0.5988 0.3918 0.7788 0.071 Uiso 1 1 calc GR . . . .
H22B H 0.6291 0.4431 0.7329 0.071 Uiso 1 1 calc GR . . . .
H22C H 0.6948 0.3778 0.7267 0.071 Uiso 1 1 calc GR . . . .
Cr1B Cr 1.39972(5) 0.24621(3) 0.25225(3) 0.02554(13) Uani 1 1 d . . . . .
Si1B Si 1.51362(11) 0.19781(6) 0.37082(5) 0.0303(2) Uani 1 1 d . . . . .
Si2B Si 1.61739(11) 0.14920(6) 0.25045(5) 0.0313(2) Uani 1 1 d . . . . .
Si3B Si 1.57535(11) 0.36969(6) 0.25747(5) 0.0303(2) Uani 1 1 d . . . . .
Si4B Si 1.49594(10) 0.30820(6) 0.13606(5) 0.0286(2) Uani 1 1 d . . . . .
N1B N 1.2475(3) 0.29356(17) 0.24001(16) 0.0301(7) Uani 1 1 d . . . . .
N2B N 1.2727(3) 0.17912(16) 0.26204(15) 0.0267(7) Uani 1 1 d . . . . .
N3B N 1.5223(3) 0.19361(16) 0.29318(15) 0.0260(7) Uani 1 1 d . . . . .
N4B N 1.5008(3) 0.31351(16) 0.21412(15) 0.0267(7) Uani 1 1 d . . . . .
C1B C 1.2395(4) 0.3542(2) 0.2279(2) 0.0357(10) Uani 1 1 d . . . . .
H1B H 1.3088 0.3770 0.2236 0.043 Uiso 1 1 calc R . . . .
C2B C 1.1383(4) 0.3840(2) 0.2215(2) 0.0411(11) Uani 1 1 d . . . . .
H2B H 1.1375 0.4262 0.2126 0.049 Uiso 1 1 calc R . . . .
C3B C 1.0336(4) 0.3510(2) 0.2283(2) 0.0410(11) Uani 1 1 d . . . . .
H3B H 0.9617 0.3711 0.2251 0.049 Uiso 1 1 calc R . . . .
C4B C 1.0382(4) 0.2900(2) 0.2396(2) 0.0343(10) Uani 1 1 d . . . . .
H4B H 0.9692 0.2668 0.2430 0.041 Uiso 1 1 calc R . . . .
C5B C 1.1467(3) 0.26118(19) 0.24621(18) 0.0264(8) Uani 1 1 d . . . . .
C6B C 1.1594(3) 0.1975(2) 0.25653(18) 0.0271(8) Uani 1 1 d . . . . .
C7B C 1.0670(4) 0.1545(2) 0.26204(19) 0.0332(9) Uani 1 1 d . . . . .
H7B H 0.9898 0.1682 0.2593 0.040 Uiso 1 1 calc R . . . .
C8B C 1.0882(4) 0.0943(2) 0.2712(2) 0.0364(10) Uani 1 1 d . . . . .
H8B H 1.0267 0.0658 0.2754 0.044 Uiso 1 1 calc R . . . .
C9B C 1.2039(4) 0.0748(2) 0.2745(2) 0.0358(10) Uani 1 1 d . . . . .
H9B H 1.2216 0.0327 0.2799 0.043 Uiso 1 1 calc R . . . .
C10B C 1.2905(4) 0.1183(2) 0.2698(2) 0.0314(9) Uani 1 1 d . . . . .
H10B H 1.3677 0.1046 0.2721 0.038 Uiso 1 1 calc R . . . .
C11B C 1.4231(5) 0.2657(3) 0.4001(2) 0.0504(13) Uani 1 1 d . . . . .
H11D H 1.4628 0.3046 0.3928 0.076 Uiso 1 1 calc GR . . . .
H11E H 1.4098 0.2648 0.4443 0.076 Uiso 1 1 calc GR . . . .
H11F H 1.3491 0.2635 0.3785 0.076 Uiso 1 1 calc GR . . . .
C12B C 1.4465(5) 0.1282(3) 0.4040(2) 0.0453(12) Uani 1 1 d . . . . .
H12D H 1.3695 0.1205 0.3867 0.068 Uiso 1 1 calc GR . . . .
H12E H 1.4409 0.1366 0.4488 0.068 Uiso 1 1 calc GR . . . .
H12F H 1.4945 0.0914 0.3937 0.068 Uiso 1 1 calc GR . . . .
C13B C 1.6545(5) 0.2083(3) 0.4126(2) 0.0465(12) Uani 1 1 d . . . . .
H13D H 1.7028 0.1717 0.4020 0.070 Uiso 1 1 calc GR . . . .
H13E H 1.6404 0.2130 0.4571 0.070 Uiso 1 1 calc GR . . . .
H13F H 1.6937 0.2456 0.4006 0.070 Uiso 1 1 calc GR . . . .
C14B C 1.6710(7) 0.0805(3) 0.2881(3) 0.071(2) Uani 1 1 d . . . . .
H14D H 1.7117 0.0950 0.3260 0.107 Uiso 1 1 calc GR . . . .
H14E H 1.7237 0.0563 0.2601 0.107 Uiso 1 1 calc GR . . . .
H14F H 1.6058 0.0541 0.2977 0.107 Uiso 1 1 calc GR . . . .
C15B C 1.7535(4) 0.1925(3) 0.2331(2) 0.0493(13) Uani 1 1 d . . . . .
H15D H 1.7359 0.2242 0.2053 0.074 Uiso 1 1 calc GR . . . .
H15E H 1.8095 0.1631 0.2135 0.074 Uiso 1 1 calc GR . . . .
H15F H 1.7857 0.2128 0.2714 0.074 Uiso 1 1 calc GR . . . .
C16B C 1.5581(4) 0.1161(2) 0.1742(2) 0.0427(11) Uani 1 1 d . . . . .
H16D H 1.4833 0.0965 0.1804 0.064 Uiso 1 1 calc GR . . . .
H16E H 1.6113 0.0849 0.1550 0.064 Uiso 1 1 calc GR . . . .
H16F H 1.5489 0.1497 0.1475 0.064 Uiso 1 1 calc GR . . . .
C17B C 1.6960(5) 0.3402(3) 0.3024(3) 0.0490(13) Uani 1 1 d . . . . .
H17D H 1.6665 0.3089 0.3283 0.074 Uiso 1 1 calc GR . . . .
H17E H 1.7305 0.3749 0.3286 0.074 Uiso 1 1 calc GR . . . .
H17F H 1.7542 0.3212 0.2742 0.074 Uiso 1 1 calc GR . . . .
C18B C 1.6496(6) 0.4294(3) 0.2136(2) 0.0541(15) Uani 1 1 d . . . . .
H18D H 1.6904 0.4084 0.1783 0.081 Uiso 1 1 calc GR . . . .
H18E H 1.7048 0.4533 0.2406 0.081 Uiso 1 1 calc GR . . . .
H18F H 1.5924 0.4578 0.1991 0.081 Uiso 1 1 calc GR . . . .
C19B C 1.4816(5) 0.4161(3) 0.3150(2) 0.0509(13) Uani 1 1 d . . . . .
H19D H 1.4326 0.4438 0.2937 0.076 Uiso 1 1 calc GR . . . .
H19E H 1.5300 0.4409 0.3449 0.076 Uiso 1 1 calc GR . . . .
H19F H 1.4333 0.3876 0.3364 0.076 Uiso 1 1 calc GR . . . .
C20B C 1.6384(4) 0.2866(3) 0.0987(2) 0.0435(12) Uani 1 1 d . . . . .
H20D H 1.6970 0.3173 0.1136 0.065 Uiso 1 1 calc GR . . . .
H20E H 1.6313 0.2861 0.0540 0.065 Uiso 1 1 calc GR . . . .
H20F H 1.6611 0.2452 0.1091 0.065 Uiso 1 1 calc GR . . . .
C21B C 1.3877(5) 0.2471(2) 0.1057(2) 0.0432(11) Uani 1 1 d . . . . .
H21D H 1.3996 0.2089 0.1256 0.065 Uiso 1 1 calc GR . . . .
H21E H 1.3976 0.2382 0.0611 0.065 Uiso 1 1 calc GR . . . .
H21F H 1.3097 0.2625 0.1145 0.065 Uiso 1 1 calc GR . . . .
C22B C 1.4486(5) 0.3806(2) 0.1021(2) 0.0396(11) Uani 1 1 d . . . . .
H22D H 1.3780 0.3962 0.1225 0.059 Uiso 1 1 calc GR . . . .
H22E H 1.4340 0.3708 0.0581 0.059 Uiso 1 1 calc GR . . . .
H22F H 1.5091 0.4124 0.1080 0.059 Uiso 1 1 calc GR . . . .
K003 K 0.0000 0.0000 1.0000 0.0302(3) Uani 1 2 d S T P . .
O00O O -0.1852(3) 0.06821(15) 1.05448(14) 0.0372(7) Uani 1 1 d . . . . .
O00S O 0.0507(3) 0.11550(15) 1.06568(14) 0.0372(7) Uani 1 1 d . . . . .
O00U O -0.2278(3) -0.03208(16) 0.96627(14) 0.0381(7) Uani 1 1 d . . . . .
O01V O -0.0145(4) 0.0398(3) 0.8887(2) 0.095(2) Uani 1 1 d . . . . .
C01G C -0.2867(4) 0.0634(3) 1.0179(2) 0.0421(11) Uani 1 1 d . . . . .
H01A H -0.2736 0.0828 0.9792 0.051 Uiso 1 1 calc R . . . .
H01B H -0.3507 0.0855 1.0404 0.051 Uiso 1 1 calc R . . . .
C01K C -0.0541(4) 0.0766(2) 0.7943(2) 0.0389(10) Uani 1 1 d . . . . .
H01C H -0.0802 0.1194 0.7891 0.047 Uiso 1 1 calc R . . . .
H01D H -0.0766 0.0486 0.7575 0.047 Uiso 1 1 calc R . . . .
C01Q C -0.3163(4) -0.0034(3) 1.0041(2) 0.0404(11) Uani 1 1 d . . . . .
H01E H -0.3226 -0.0237 1.0427 0.048 Uiso 1 1 calc R . . . .
H01F H -0.3910 -0.0079 0.9825 0.048 Uiso 1 1 calc R . . . .
C02G C 0.1589(4) 0.1178(2) 1.0978(2) 0.0400(11) Uani 1 1 d . . . . .
H02A H 0.1554 0.0911 1.1321 0.048 Uiso 1 1 calc R . . . .
H02B H 0.1761 0.1611 1.1150 0.048 Uiso 1 1 calc R . . . .
C02K C 0.2495(4) 0.0954(2) 1.0536(2) 0.0434(11) Uani 1 1 d . . . . .
H02C H 0.2493 0.1204 1.0179 0.052 Uiso 1 1 calc R . . . .
H02D H 0.3259 0.0999 1.0734 0.052 Uiso 1 1 calc R . . . .
C02N C -0.1041(5) 0.0540(3) 0.8519(3) 0.0532(14) Uani 1 1 d . . . . .
H02E H -0.1525 0.0868 0.8736 0.064 Uiso 1 1 calc R . . . .
H02F H -0.1527 0.0166 0.8413 0.064 Uiso 1 1 calc R . . . .
C02W C -0.1506(5) 0.1316(2) 1.0700(2) 0.0425(12) Uani 1 1 d . . . . .
H02G H -0.2115 0.1542 1.0947 0.051 Uiso 1 1 calc R . . . .
H02H H -0.1389 0.1525 1.0321 0.051 Uiso 1 1 calc R . . . .
C024 C 0.0748(5) 0.0752(3) 0.8045(3) 0.0539(14) Uani 1 1 d . . . . .
H02I H 0.1097 0.0388 0.7804 0.065 Uiso 1 1 calc R . . . .
H02J H 0.1119 0.1137 0.7927 0.065 Uiso 1 1 calc R . . . .
C028 C -0.0405(4) 0.1332(2) 1.1063(2) 0.0383(10) Uani 1 1 d . . . . .
H02K H -0.0265 0.1757 1.1265 0.046 Uiso 1 1 calc R . . . .
H02L H -0.0460 0.1041 1.1386 0.046 Uiso 1 1 calc R . . . .
C033 C 0.0863(5) 0.0704(4) 0.8713(3) 0.080(2) Uani 1 1 d . . . . .
H03A H 0.1553 0.0460 0.8799 0.096 Uiso 1 1 calc R . . . .
H03B H 0.0929 0.1123 0.8940 0.096 Uiso 1 1 calc R . . . .
K004 K 1.0000 0.0000 0.5000 0.0297(3) Uani 1 2 d S T P . .
O00F O 0.9574(3) 0.05976(15) 0.61806(14) 0.0341(7) Uani 1 1 d . . . . .
O00G O 1.1902(3) 0.03970(16) 0.57390(13) 0.0347(7) Uani 1 1 d . . . . .
O00H O 0.7769(3) 0.04374(15) 0.52953(13) 0.0333(7) Uani 1 1 d . . . . .
O00X O 1.0329(3) 0.11818(18) 0.47915(18) 0.0514(9) Uani 1 1 d . . . . .
C01A C 1.1575(4) 0.0549(2) 0.63603(19) 0.0361(10) Uani 1 1 d . . . . .
H01G H 1.2218 0.0764 0.6591 0.043 Uiso 1 1 calc R . . . .
H01H H 1.1390 0.0163 0.6553 0.043 Uiso 1 1 calc R . . . .
C01B C 0.7563(4) 0.0589(2) 0.5933(2) 0.0367(10) Uani 1 1 d . . . . .
H01I H 0.7492 0.0204 0.6143 0.044 Uiso 1 1 calc R . . . .
H01J H 0.6840 0.0827 0.5995 0.044 Uiso 1 1 calc R . . . .
C01D C 0.8571(4) 0.0977(2) 0.6190(2) 0.0370(10) Uani 1 1 d . . . . .
H01K H 0.8705 0.1330 0.5940 0.044 Uiso 1 1 calc R . . . .
H01L H 0.8401 0.1149 0.6617 0.044 Uiso 1 1 calc R . . . .
C01H C 1.0551(4) 0.0962(2) 0.6382(2) 0.0345(10) Uani 1 1 d . . . . .
H01M H 1.0427 0.1154 0.6807 0.041 Uiso 1 1 calc R . . . .
H01N H 1.0674 0.1299 0.6112 0.041 Uiso 1 1 calc R . . . .
C01R C 0.9857(4) 0.1988(2) 0.4198(2) 0.0388(10) Uani 1 1 d . . . . .
H01O H 0.9497 0.2327 0.4470 0.047 Uiso 1 1 calc R . . . .
H01P H 0.9655 0.2039 0.3766 0.047 Uiso 1 1 calc R . . . .
C02L C 1.1161(5) 0.1987(3) 0.4285(2) 0.0454(12) Uani 1 1 d . . . . .
H02M H 1.1563 0.1989 0.3886 0.054 Uiso 1 1 calc R . . . .
H02N H 1.1415 0.2353 0.4562 0.054 Uiso 1 1 calc R . . . .
C015 C 0.6834(4) 0.0108(2) 0.4998(2) 0.0350(10) Uani 1 1 d . . . . .
H01Q H 0.6122 0.0356 0.5056 0.042 Uiso 1 1 calc R . . . .
H01R H 0.6712 -0.0294 0.5174 0.042 Uiso 1 1 calc R . . . .
C018 C 1.2882(4) 0.0005(2) 0.5672(2) 0.0351(10) Uani 1 1 d . . . . .
H01S H 1.2718 -0.0395 0.5841 0.042 Uiso 1 1 calc R . . . .
H01T H 1.3542 0.0208 0.5899 0.042 Uiso 1 1 calc R . . . .
C027 C 0.9475(5) 0.1353(3) 0.4372(3) 0.0495(13) Uani 1 1 d . . . . .
H02O H 0.8708 0.1379 0.4570 0.059 Uiso 1 1 calc R . . . .
H02P H 0.9439 0.1046 0.4005 0.059 Uiso 1 1 calc R . . . .
C029 C 1.1386(5) 0.1384(3) 0.4572(3) 0.0599(16) Uani 1 1 d . . . . .
H02Q H 1.1705 0.1065 0.4261 0.072 Uiso 1 1 calc R . . . .
H02R H 1.1944 0.1457 0.4914 0.072 Uiso 1 1 calc R . . . .
K005 K 1.0000 0.5000 0.5000 0.0302(3) Uani 1 2 d S T P . .
O00Q O 1.0946(3) 0.39311(15) 0.44037(14) 0.0365(7) Uani 1 1 d . . . . .
O00R O 1.1504(3) 0.58562(15) 0.56415(14) 0.0360(7) Uani 1 1 d . . . . .
O00W O 1.2402(3) 0.49075(15) 0.48154(15) 0.0376(7) Uani 1 1 d . . . . .
O013 O 0.9725(4) 0.4332(3) 0.5954(2) 0.0750(15) Uani 1 1 d . . . . .
C01O C 1.2842(4) 0.4303(2) 0.4666(3) 0.0430(12) Uani 1 1 d . . . . .
H01U H 1.2823 0.4064 0.5030 0.052 Uiso 1 1 calc R . . . .
H01V H 1.3648 0.4325 0.4521 0.052 Uiso 1 1 calc R . . . .
C01Y C 1.2590(4) 0.5915(2) 0.5342(2) 0.0396(11) Uani 1 1 d . . . . .
H01W H 1.3103 0.6200 0.5601 0.048 Uiso 1 1 calc R . . . .
H01X H 1.2481 0.6089 0.4943 0.048 Uiso 1 1 calc R . . . .
C02A C 1.0183(4) 0.3632(2) 0.3967(2) 0.0381(10) Uani 1 1 d . . . . .
H02S H 1.0488 0.3219 0.3811 0.046 Uiso 1 1 calc R . . . .
H02T H 1.0100 0.3884 0.3615 0.046 Uiso 1 1 calc R . . . .
C02P C 1.0945(4) 0.6442(2) 0.5737(2) 0.0349(10) Uani 1 1 d . . . . .
H02U H 1.0838 0.6615 0.5338 0.042 Uiso 1 1 calc R . . . .
H02V H 1.1429 0.6738 0.6002 0.042 Uiso 1 1 calc R . . . .
C02T C 0.8841(5) 0.4319(3) 0.6401(2) 0.0471(12) Uani 1 1 d . . . . .
H02W H 0.8470 0.3903 0.6373 0.057 Uiso 1 1 calc R . . . .
H02X H 0.8248 0.4633 0.6336 0.057 Uiso 1 1 calc R . . . .
C02V C 1.2077(4) 0.3990(2) 0.4156(2) 0.0434(12) Uani 1 1 d . . . . .
H02Y H 1.2056 0.4245 0.3804 0.052 Uiso 1 1 calc R . . . .
H H 1.2382 0.3573 0.4010 0.052 Uiso 1 1 calc R . . . .
C03B C 0.9377(6) 0.4459(5) 0.7002(4) 0.100(3) Uani 1 1 d . . . . .
H03C H 0.9350 0.4089 0.7235 0.120 Uiso 1 1 calc R . . . .
H03D H 0.8968 0.4805 0.7241 0.120 Uiso 1 1 calc R . . . .
C03D C 1.0620(6) 0.4646(4) 0.6888(4) 0.085(2) Uani 1 1 d . . . . .
H03E H 1.0705 0.5101 0.6873 0.102 Uiso 1 1 calc R . . . .
H03F H 1.1147 0.4505 0.7201 0.102 Uiso 1 1 calc R . . . .
C023 C 1.3112(4) 0.5284(2) 0.5241(2) 0.0388(11) Uani 1 1 d . . . . .
H02Z H 1.3900 0.5314 0.5073 0.047 Uiso 1 1 calc R . . . .
HA H 1.3159 0.5094 0.5635 0.047 Uiso 1 1 calc R . . . .
C030 C 1.0804(5) 0.4293(4) 0.6267(3) 0.0665(19) Uani 1 1 d . . . . .
H03G H 1.1429 0.4486 0.6041 0.080 Uiso 1 1 calc R . . . .
H03H H 1.1002 0.3853 0.6308 0.080 Uiso 1 1 calc R . . . .
K006 K 1.0000 0.5000 1.0000 0.0349(3) Uani 1 2 d S T P . .
O00I O 0.7775(3) 0.45583(17) 0.96436(15) 0.0422(8) Uani 1 1 d . . . . .
O00K O 0.9624(3) 0.44638(17) 0.87888(15) 0.0433(8) Uani 1 1 d . . . . .
O00L O 0.8077(3) 0.53292(16) 1.07253(16) 0.0419(8) Uani 1 1 d . . . . .
O017 O 1.0265(4) 0.3830(2) 1.0247(3) 0.0825(16) Uani 1 1 d . . . . .
C01E C 0.8356(5) 0.5431(3) 1.1365(2) 0.0474(12) Uani 1 1 d . . . . .
H01Y H 0.8531 0.5030 1.1528 0.057 Uiso 1 1 calc R . . . .
HB H 0.7699 0.5625 1.1599 0.057 Uiso 1 1 calc R . . . .
C01F C 1.0626(5) 0.4150(3) 0.8571(3) 0.0508(13) Uani 1 1 d . . . . .
H01Z H 1.0523 0.3994 0.8133 0.061 Uiso 1 1 calc R . . . .
HC H 1.0754 0.3786 0.8806 0.061 Uiso 1 1 calc R . . . .
C01I C 0.7059(4) 0.4972(3) 1.0616(2) 0.0444(12) Uani 1 1 d . . . . .
H01 H 0.6402 0.5188 1.0831 0.053 Uiso 1 1 calc R . . . .
HD H 0.7146 0.4560 1.0774 0.053 Uiso 1 1 calc R . . . .
C01M C 0.9552(5) 0.2930(3) 1.0636(3) 0.0534(14) Uani 1 1 d . . . . .
H0AA H 0.9408 0.2821 1.1059 0.064 Uiso 1 1 calc R . . . .
HE H 0.9064 0.2663 1.0346 0.064 Uiso 1 1 calc R . . . .
C02C C 0.6839(4) 0.4890(3) 0.9934(3) 0.0466(12) Uani 1 1 d . . . . .
H02 H 0.6114 0.4655 0.9847 0.056 Uiso 1 1 calc R . . . .
HF H 0.6768 0.5302 0.9774 0.056 Uiso 1 1 calc R . . . .
C02F C 0.8628(5) 0.4070(3) 0.8739(3) 0.0535(14) Uani 1 1 d . . . . .
H1AA H 0.8749 0.3700 0.8966 0.064 Uiso 1 1 calc R . . . .
HG H 0.8479 0.3925 0.8302 0.064 Uiso 1 1 calc R . . . .
C02Z C 0.9325(6) 0.3613(3) 1.0586(3) 0.0668(18) Uani 1 1 d . . . . .
H2AA H 0.8591 0.3666 1.0369 0.080 Uiso 1 1 calc R . . . .
HH H 0.9283 0.3845 1.0999 0.080 Uiso 1 1 calc R . . . .
C03A C 1.0776(6) 0.2862(4) 1.0473(6) 0.114(4) Uani 1 1 d . . . . .
H03I H 1.1217 0.2740 1.0829 0.136 Uiso 1 1 calc R . . . .
H03J H 1.0871 0.2534 1.0127 0.136 Uiso 1 1 calc R . . . .
C03C C 1.1186(6) 0.3448(4) 1.0302(4) 0.078(2) Uani 1 1 d . . . . .
H03K H 1.1722 0.3640 1.0619 0.094 Uiso 1 1 calc R . . . .
H03L H 1.1605 0.3386 0.9906 0.094 Uiso 1 1 calc R . . . .
C020 C 0.7633(5) 0.4435(3) 0.9003(2) 0.0498(13) Uani 1 1 d . . . . .
H3AA H 0.7580 0.4832 0.8813 0.060 Uiso 1 1 calc R . . . .
HI H 0.6912 0.4197 0.8914 0.060 Uiso 1 1 calc R . . . .

loop_
_atom_site_aniso_label
_atom_site_aniso_U_11
_atom_site_aniso_U_22
_atom_site_aniso_U_33
_atom_site_aniso_U_23
_atom_site_aniso_U_13
_atom_site_aniso_U_12
Cr1A 0.0202(3) 0.0358(3) 0.0231(3) 0.0015(3) -0.0013(2) 0.0025(3)
Si1A 0.0256(6) 0.0382(7) 0.0318(6) 0.0061(5) -0.0019(5) 0.0029(5)
Si2A 0.0307(6) 0.0468(7) 0.0248(6) -0.0001(5) 0.0029(5) 0.0026(5)
Si3A 0.0250(5) 0.0381(6) 0.0293(6) -0.0011(5) -0.0059(5) 0.0019(5)
Si4A 0.0251(6) 0.0352(6) 0.0354(6) 0.0033(5) -0.0010(5) 0.0035(5)
N1A 0.0194(16) 0.0335(18) 0.0272(17) 0.0029(14) -0.0005(13) 0.0036(14)
N2A 0.0217(17) 0.0369(19) 0.0322(18) 0.0039(15) -0.0063(14) -0.0007(14)
N3A 0.0234(16) 0.0392(19) 0.0195(15) 0.0028(13) 0.0005(13) 0.0013(15)
N4A 0.0175(15) 0.0351(18) 0.0270(16) 0.0013(14) -0.0029(13) 0.0028(14)
C1A 0.029(2) 0.039(2) 0.029(2) 0.0046(18) -0.0018(17) -0.0019(18)
C2A 0.030(2) 0.044(3) 0.026(2) 0.0032(18) 0.0002(17) 0.0004(19)
C3A 0.030(2) 0.044(3) 0.037(2) 0.004(2) 0.0057(18) 0.002(2)
C4A 0.022(2) 0.039(2) 0.035(2) -0.0028(18) 0.0033(17) -0.0005(18)
C5A 0.0217(19) 0.032(2) 0.0273(19) -0.0026(16) -0.0009(15) 0.0017(16)
C6A 0.0210(17) 0.0278(18) 0.031(2) 0.0001(15) -0.0021(16) 0.0052(17)
C7A 0.022(2) 0.039(2) 0.040(2) -0.0017(19) -0.0037(17) -0.0005(17)
C8A 0.031(2) 0.044(3) 0.041(2) 0.001(2) -0.0103(19) -0.002(2)
C9A 0.038(2) 0.047(3) 0.035(2) 0.006(2) -0.012(2) 0.000(2)
C10A 0.027(2) 0.048(3) 0.031(2) 0.0049(19) -0.0015(17) -0.0020(19)
C11A 0.055(4) 0.118(6) 0.039(3) -0.016(3) 0.003(3) -0.003(4)
C12A 0.072(4) 0.056(3) 0.043(3) -0.002(2) 0.015(3) 0.014(3)
C13A 0.047(3) 0.073(4) 0.063(4) 0.007(3) 0.019(3) 0.002(3)
C14A 0.052(3) 0.057(3) 0.048(3) 0.017(3) -0.007(2) 0.001(3)
C15A 0.036(3) 0.046(3) 0.050(3) -0.002(2) 0.001(2) 0.010(2)
C16A 0.041(3) 0.046(3) 0.069(4) 0.007(3) -0.011(3) -0.005(2)
C17A 0.027(2) 0.054(3) 0.053(3) -0.003(2) -0.001(2) -0.001(2)
C18A 0.039(3) 0.045(3) 0.049(3) -0.008(2) 0.000(2) 0.002(2)
C19A 0.059(4) 0.063(4) 0.049(3) 0.000(3) -0.023(3) 0.002(3)
C20A 0.035(3) 0.041(3) 0.065(3) 0.001(2) 0.005(2) 0.009(2)
C21A 0.045(3) 0.051(3) 0.058(3) 0.026(3) 0.001(2) -0.003(2)
C22A 0.041(3) 0.044(3) 0.056(3) -0.003(2) -0.012(2) -0.001(2)
Cr1B 0.0206(3) 0.0305(3) 0.0256(3) 0.0030(2) -0.0007(3) 0.0016(3)
Si1B 0.0277(6) 0.0388(6) 0.0248(5) 0.0052(5) -0.0011(4) 0.0015(5)
Si2B 0.0284(6) 0.0364(6) 0.0287(6) -0.0002(5) -0.0031(5) 0.0071(5)
Si3B 0.0321(6) 0.0326(6) 0.0256(5) -0.0006(5) 0.0011(5) -0.0035(5)
Si4B 0.0274(6) 0.0341(6) 0.0241(5) 0.0022(4) -0.0024(4) 0.0022(5)
N1B 0.0253(17) 0.0354(19) 0.0297(17) 0.0031(15) -0.0001(14) 0.0038(15)
N2B 0.0216(16) 0.0314(18) 0.0275(17) 0.0043(14) -0.0005(13) 0.0017(14)
N3B 0.0239(17) 0.0297(17) 0.0243(16) 0.0015(13) -0.0045(13) 0.0017(14)
N4B 0.0248(17) 0.0296(17) 0.0257(16) 0.0023(13) 0.0001(14) 0.0012(14)
C1B 0.036(2) 0.034(2) 0.036(2) 0.0004(19) 0.0010(19) 0.0066(19)
C2B 0.039(3) 0.042(3) 0.042(3) 0.002(2) -0.002(2) 0.013(2)
C3B 0.032(2) 0.051(3) 0.040(2) 0.000(2) -0.0041(19) 0.012(2)
C4B 0.026(2) 0.044(3) 0.032(2) -0.0038(19) -0.0012(17) 0.0066(19)
C5B 0.0228(18) 0.032(2) 0.0238(18) 0.0001(16) 0.0009(15) 0.0038(16)
C6B 0.0202(18) 0.039(2) 0.0223(18) 0.0020(16) -0.0007(14) -0.0016(16)
C7B 0.022(2) 0.049(3) 0.028(2) -0.0006(18) -0.0002(16) -0.0035(19)
C8B 0.030(2) 0.042(3) 0.036(2) -0.0008(19) 0.0017(18) -0.0055(19)
C9B 0.033(2) 0.037(2) 0.038(2) 0.0042(19) -0.0049(19) -0.0038(19)
C10B 0.028(2) 0.030(2) 0.036(2) 0.0035(17) -0.0019(17) -0.0024(17)
C11B 0.059(3) 0.057(3) 0.036(3) 0.005(2) 0.011(2) 0.015(3)
C12B 0.044(3) 0.057(3) 0.037(2) 0.016(2) -0.007(2) -0.014(2)
C13B 0.045(3) 0.062(3) 0.033(2) 0.008(2) -0.010(2) -0.010(3)
C14B 0.107(6) 0.062(4) 0.045(3) 0.005(3) 0.009(3) 0.051(4)
C15B 0.025(2) 0.073(4) 0.046(3) -0.015(3) 0.001(2) 0.002(2)
C16B 0.042(3) 0.049(3) 0.035(2) -0.010(2) -0.001(2) -0.002(2)
C17B 0.042(3) 0.053(3) 0.050(3) -0.005(2) -0.015(2) -0.006(2)
C18B 0.070(4) 0.052(3) 0.038(3) -0.001(2) 0.000(3) -0.032(3)
C19B 0.054(3) 0.048(3) 0.048(3) -0.008(2) 0.006(2) 0.002(3)
C20B 0.038(3) 0.063(3) 0.030(2) 0.005(2) 0.0027(19) 0.011(2)
C21B 0.047(3) 0.045(3) 0.037(2) 0.000(2) -0.012(2) -0.004(2)
C22B 0.042(3) 0.043(3) 0.035(2) 0.010(2) -0.003(2) 0.002(2)
K003 0.0284(6) 0.0358(7) 0.0255(6) -0.0008(5) -0.0011(5) 0.0026(6)
O00O 0.0337(17) 0.0433(18) 0.0339(16) -0.0002(14) -0.0064(13) 0.0084(14)
O00S 0.0421(18) 0.0392(18) 0.0293(15) -0.0022(13) -0.0002(13) 0.0006(14)
O00U 0.0290(16) 0.049(2) 0.0345(16) -0.0065(14) 0.0026(13) -0.0022(14)
O01V 0.046(2) 0.170(5) 0.084(3) 0.087(4) -0.022(2) -0.040(3)
C01G 0.035(2) 0.058(3) 0.033(2) 0.000(2) -0.0024(19) 0.012(2)
C01K 0.035(2) 0.039(3) 0.043(3) 0.007(2) -0.002(2) 0.001(2)
C01Q 0.021(2) 0.063(3) 0.035(2) -0.005(2) 0.0014(18) 0.004(2)
C02G 0.040(3) 0.043(3) 0.035(2) -0.005(2) -0.008(2) -0.006(2)
C02K 0.039(3) 0.044(3) 0.046(3) -0.003(2) -0.004(2) -0.009(2)
C02N 0.039(3) 0.067(4) 0.056(3) 0.019(3) 0.002(2) 0.001(3)
C02W 0.051(3) 0.038(3) 0.038(2) -0.006(2) -0.006(2) 0.014(2)
C024 0.036(3) 0.076(4) 0.052(3) 0.018(3) -0.004(2) -0.004(3)
C028 0.042(3) 0.037(2) 0.034(2) -0.0046(19) -0.0003(19) 0.008(2)
C033 0.045(4) 0.130(7) 0.074(4) 0.058(5) -0.014(3) -0.035(4)
K004 0.0273(6) 0.0315(6) 0.0299(6) 0.0004(5) -0.0036(5) 0.0028(5)
O00F 0.0312(16) 0.0378(17) 0.0321(16) -0.0032(13) -0.0046(12) 0.0028(13)
O00G 0.0296(16) 0.0459(19) 0.0285(15) 0.0026(13) -0.0054(12) 0.0060(14)
O00H 0.0288(16) 0.0418(18) 0.0287(15) 0.0002(13) -0.0010(12) 0.0000(14)
O00X 0.038(2) 0.055(2) 0.066(2) 0.0277(19) -0.0041(17) 0.0006(17)
C01A 0.035(2) 0.048(3) 0.025(2) -0.0023(19) -0.0064(17) 0.000(2)
C01B 0.027(2) 0.048(3) 0.033(2) -0.004(2) 0.0031(18) 0.007(2)
C01D 0.030(2) 0.046(3) 0.032(2) -0.0078(19) -0.0008(18) 0.006(2)
C01H 0.033(2) 0.040(2) 0.030(2) -0.0051(18) -0.0027(17) -0.0039(19)
C01R 0.043(3) 0.040(2) 0.034(2) 0.0064(19) 0.001(2) 0.006(2)
C02L 0.048(3) 0.051(3) 0.037(2) 0.006(2) -0.002(2) -0.008(2)
C015 0.022(2) 0.041(3) 0.041(2) -0.001(2) -0.0010(18) 0.0011(18)
C018 0.029(2) 0.039(2) 0.038(2) 0.0040(19) -0.0086(18) -0.0011(19)
C027 0.038(3) 0.054(3) 0.059(3) 0.016(3) -0.011(2) -0.006(2)
C029 0.036(3) 0.080(4) 0.068(4) 0.030(3) 0.004(3) 0.002(3)
K005 0.0265(6) 0.0361(7) 0.0271(6) -0.0019(5) 0.0003(5) 0.0034(6)
O00Q 0.0333(17) 0.0401(17) 0.0342(16) -0.0056(13) 0.0030(13) -0.0003(14)
O00R 0.0341(17) 0.0368(17) 0.0366(16) 0.0009(13) -0.0044(13) 0.0002(14)
O00W 0.0303(16) 0.0407(18) 0.0408(18) -0.0005(14) -0.0006(13) 0.0047(14)
O013 0.038(2) 0.136(4) 0.058(2) 0.046(3) 0.0079(18) 0.016(2)
C01O 0.029(2) 0.036(3) 0.062(3) -0.002(2) 0.005(2) 0.012(2)
C01Y 0.035(2) 0.044(3) 0.039(2) 0.002(2) 0.004(2) -0.009(2)
C02A 0.047(3) 0.037(2) 0.030(2) 0.0004(18) -0.002(2) 0.007(2)
C02P 0.035(2) 0.032(2) 0.037(2) -0.0028(18) -0.0039(19) 0.0025(19)
C02T 0.039(3) 0.052(3) 0.052(3) 0.013(2) 0.003(2) 0.005(2)
C02V 0.034(2) 0.045(3) 0.049(3) -0.008(2) 0.009(2) 0.007(2)
C03B 0.038(3) 0.172(9) 0.075(5) -0.054(5) -0.003(3) -0.004(4)
C03D 0.049(4) 0.089(5) 0.114(6) 0.000(5) -0.024(4) -0.011(4)
C023 0.027(2) 0.048(3) 0.041(2) 0.003(2) -0.0007(19) -0.002(2)
C030 0.035(3) 0.109(6) 0.061(4) 0.034(4) 0.007(3) 0.006(3)
K006 0.0326(7) 0.0347(7) 0.0376(7) 0.0041(5) 0.0035(6) 0.0028(6)
O00I 0.0356(18) 0.052(2) 0.0401(18) 0.0110(16) -0.0017(14) 0.0007(16)
O00K 0.0399(19) 0.047(2) 0.0414(18) -0.0029(15) 0.0042(15) -0.0011(16)
O00L 0.0390(18) 0.0435(19) 0.0438(19) 0.0082(15) 0.0108(15) 0.0040(15)
O017 0.060(3) 0.061(3) 0.133(4) 0.044(3) 0.032(3) 0.014(2)
C01E 0.051(3) 0.047(3) 0.044(3) 0.004(2) 0.014(2) 0.003(2)
C01F 0.054(3) 0.051(3) 0.047(3) 0.003(2) 0.012(2) 0.008(3)
C01I 0.036(3) 0.047(3) 0.051(3) 0.010(2) 0.008(2) 0.001(2)
C01M 0.062(4) 0.052(3) 0.048(3) 0.011(2) -0.010(3) -0.005(3)
C02C 0.035(3) 0.054(3) 0.053(3) 0.017(3) 0.004(2) 0.006(2)
C02F 0.051(3) 0.062(4) 0.047(3) 0.000(3) -0.001(2) -0.013(3)
C02Z 0.059(4) 0.066(4) 0.082(4) 0.036(4) 0.019(3) 0.013(3)
C03A 0.046(4) 0.056(4) 0.245(12) 0.046(6) 0.025(6) 0.013(3)
C03C 0.045(3) 0.085(5) 0.111(6) 0.046(4) 0.000(4) 0.013(3)
C020 0.043(3) 0.066(4) 0.041(3) 0.008(3) -0.009(2) -0.006(3)

_geom_special_details            
;
 All esds (except the esd in the dihedral angle between two l.s. planes)
 are estimated using the full covariance matrix.  The cell esds are taken
 into account individually in the estimation of esds in distances, angles
 and torsion angles; correlations between esds in cell parameters are only
 used when they are defined by crystal symmetry.  An approximate (isotropic)
 treatment of cell esds is used for estimating esds involving l.s. planes.
;
loop_
_geom_bond_atom_site_label_1
_geom_bond_atom_site_label_2
_geom_bond_distance
_geom_bond_site_symmetry_2
_geom_bond_publ_flag
Cr1A N1A 2.089(3) . ?
Cr1A N2A 2.073(3) . ?
Cr1A N3A 2.102(3) . ?
Cr1A N4A 2.076(3) . ?
Si1A N3A 1.686(4) . ?
Si1A C14A 1.901(5) . ?
Si1A C15A 1.891(5) . ?
Si1A C16A 1.864(6) . ?
Si2A N3A 1.703(3) . ?
Si2A C11A 1.895(6) . ?
Si2A C12A 1.842(6) . ?
Si2A C13A 1.889(6) . ?
Si3A N4A 1.698(4) . ?
Si3A C17A 1.890(5) . ?
Si3A C18A 1.878(5) . ?
Si3A C19A 1.875(6) . ?
Si4A N4A 1.698(4) . ?
Si4A C20A 1.872(5) . ?
Si4A C21A 1.896(5) . ?
Si4A C22A 1.868(5) . ?
N1A C1A 1.342(5) . ?
N1A C5A 1.395(5) . ?
N2A C6A 1.403(5) . ?
N2A C10A 1.336(6) . ?
C1A C2A 1.371(6) . ?
C2A C3A 1.406(6) . ?
C3A C4A 1.362(6) . ?
C4A C5A 1.420(6) . ?
C5A C6A 1.417(6) . ?
C6A C7A 1.410(5) . ?
C7A C8A 1.355(6) . ?
C8A C9A 1.425(7) . ?
C9A C10A 1.378(6) . ?
Cr1B N1B 2.079(4) . ?
Cr1B N2B 2.086(4) . ?
Cr1B N3B 2.084(3) . ?
Cr1B N4B 2.096(4) . ?
Si1B N3B 1.693(3) . ?
Si1B C11B 1.869(5) . ?
Si1B C12B 1.893(5) . ?
Si1B C13B 1.879(5) . ?
Si2B N3B 1.687(4) . ?
Si2B C14B 1.874(6) . ?
Si2B C15B 1.889(5) . ?
Si2B C16B 1.877(5) . ?
Si3B N4B 1.697(4) . ?
Si3B C17B 1.865(5) . ?
Si3B C18B 1.884(5) . ?
Si3B C19B 1.879(5) . ?
Si4B N4B 1.700(3) . ?
Si4B C20B 1.887(5) . ?
Si4B C21B 1.889(5) . ?
Si4B C22B 1.878(5) . ?
N1B C1B 1.363(6) . ?
N1B C5B 1.374(5) . ?
N2B C6B 1.387(5) . ?
N2B C10B 1.356(5) . ?
C1B C2B 1.358(6) . ?
C2B C3B 1.420(7) . ?
C3B C4B 1.362(7) . ?
C4B C5B 1.424(6) . ?
C5B C6B 1.421(6) . ?
C6B C7B 1.428(6) . ?
C7B C8B 1.357(7) . ?
C8B C9B 1.416(6) . ?
C9B C10B 1.381(6) . ?
K003 O00O 2.811(3) . ?
K003 O00O 2.811(3) 2_557 ?
K003 O00S 2.809(3) . ?
K003 O00S 2.809(3) 2_557 ?
K003 O00U 2.814(3) 2_557 ?
K003 O00U 2.814(3) . ?
K003 O01V 2.664(4) 2_557 ?
K003 O01V 2.664(4) . ?
K003 C033 3.468(6) 2_557 ?
O00O C01G 1.424(5) . ?
O00O C02W 1.430(6) . ?
O00S C02G 1.440(6) . ?
O00S C028 1.412(6) . ?
O00U C01Q 1.424(5) . ?
O00U C02K 1.412(6) 2_557 ?
O01V C02N 1.372(7) . ?
O01V C033 1.411(7) . ?
C01G C01Q 1.482(8) . ?
C01K C02N 1.507(7) . ?
C01K C024 1.517(7) . ?
C02G C02K 1.480(7) . ?
C02K O00U 1.412(6) 2_557 ?
C02W C028 1.506(7) . ?
C024 C033 1.481(8) . ?
K004 O00F 2.813(3) 2_756 ?
K004 O00F 2.813(3) . ?
K004 O00G 2.820(3) . ?
K004 O00G 2.820(3) 2_756 ?
K004 O00H 2.818(3) 2_756 ?
K004 O00H 2.818(3) . ?
K004 O00X 2.657(4) 2_756 ?
K004 O00X 2.657(4) . ?
K004 C027 3.402(5) 2_756 ?
O00F C01D 1.427(5) . ?
O00F C01H 1.422(5) . ?
O00G C01A 1.417(5) . ?
O00G C018 1.421(5) . ?
O00H C01B 1.419(5) . ?
O00H C015 1.418(5) . ?
O00X C027 1.427(6) . ?
O00X C029 1.401(7) . ?
C01A C01H 1.490(7) . ?
C01B C01D 1.512(7) . ?
C01R C02L 1.528(7) . ?
C01R C027 1.518(7) . ?
C02L C029 1.522(8) . ?
C015 C018 1.496(7) 2_756 ?
C018 C015 1.496(7) 2_756 ?
K005 O00Q 2.767(3) 2_766 ?
K005 O00Q 2.767(3) . ?
K005 O00R 2.809(3) 2_766 ?
K005 O00R 2.809(3) . ?
K005 O00W 2.827(3) 2_766 ?
K005 O00W 2.827(3) . ?
K005 O013 2.665(4) 2_766 ?
K005 O013 2.665(4) . ?
K005 C02P 3.528(4) 2_766 ?
K005 C030 3.422(6) 2_766 ?
O00Q C02A 1.410(5) . ?
O00Q C02V 1.430(6) . ?
O00R C01Y 1.432(6) . ?
O00R C02P 1.422(5) . ?
O00W C01O 1.412(5) . ?
O00W C023 1.432(5) . ?
O013 C02T 1.419(6) . ?
O013 C030 1.436(7) . ?
C01O C02V 1.529(7) . ?
C01Y C023 1.490(7) . ?
C02A C02P 1.476(7) 2_766 ?
C02P C02A 1.476(7) 2_766 ?
C02T C03B 1.458(8) . ?
C03B C03D 1.524(10) . ?
C03D C030 1.505(10) . ?
K006 O00I 2.834(3) 2_767 ?
K006 O00I 2.834(3) . ?
K006 O00K 2.816(3) . ?
K006 O00K 2.816(3) 2_767 ?
K006 O00L 2.794(3) 2_767 ?
K006 O00L 2.794(3) . ?
K006 O017 2.650(4) . ?
K006 O017 2.650(4) 2_767 ?
K006 C02Z 3.452(6) 2_767 ?
O00I C02C 1.420(6) . ?
O00I C020 1.409(6) . ?
O00K C01F 1.411(6) . ?
O00K C02F 1.429(7) . ?
O00L C01E 1.432(6) . ?
O00L C01I 1.416(6) . ?
O017 C02Z 1.421(7) . ?
O017 C03C 1.368(8) . ?
C01E C01F 1.483(8) 2_767 ?
C01F C01E 1.483(8) 2_767 ?
C01I C02C 1.506(8) . ?
C01M C02Z 1.512(8) . ?
C01M C03A 1.470(9) . ?
C02F C020 1.487(8) . ?
C03A C03C 1.432(10) . ?

loop_
_geom_angle_atom_site_label_1
_geom_angle_atom_site_label_2
_geom_angle_atom_site_label_3
_geom_angle
_geom_angle_site_symmetry_1
_geom_angle_site_symmetry_3
_geom_angle_publ_flag
N1A Cr1A N3A 160.07(14) . . ?
N2A Cr1A N1A 77.21(14) . . ?
N2A Cr1A N3A 93.19(14) . . ?
N2A Cr1A N4A 158.79(15) . . ?
N4A Cr1A N1A 91.70(13) . . ?
N4A Cr1A N3A 102.44(12) . . ?
N3A Si1A C14A 114.0(2) . . ?
N3A Si1A C15A 111.1(2) . . ?
N3A Si1A C16A 114.9(2) . . ?
C15A Si1A C14A 104.9(3) . . ?
C16A Si1A C14A 104.5(3) . . ?
C16A Si1A C15A 106.6(3) . . ?
N3A Si2A C11A 113.5(2) . . ?
N3A Si2A C12A 115.4(2) . . ?
N3A Si2A C13A 113.3(2) . . ?
C12A Si2A C11A 103.6(3) . . ?
C12A Si2A C13A 105.5(3) . . ?
C13A Si2A C11A 104.3(3) . . ?
N4A Si3A C17A 113.1(2) . . ?
N4A Si3A C18A 112.7(2) . . ?
N4A Si3A C19A 114.8(2) . . ?
C18A Si3A C17A 106.3(2) . . ?
C19A Si3A C17A 104.9(3) . . ?
C19A Si3A C18A 104.1(3) . . ?
N4A Si4A C20A 113.6(2) . . ?
N4A Si4A C21A 115.7(2) . . ?
N4A Si4A C22A 111.2(2) . . ?
C20A Si4A C21A 103.3(3) . . ?
C22A Si4A C20A 107.9(3) . . ?
C22A Si4A C21A 104.3(3) . . ?
C1A N1A Cr1A 126.2(3) . . ?
C1A N1A C5A 117.6(3) . . ?
C5A N1A Cr1A 116.1(3) . . ?
C6A N2A Cr1A 116.4(3) . . ?
C10A N2A Cr1A 126.5(3) . . ?
C10A N2A C6A 116.9(4) . . ?
Si1A N3A Cr1A 113.67(18) . . ?
Si1A N3A Si2A 122.0(2) . . ?
Si2A N3A Cr1A 124.0(2) . . ?
Si3A N4A Cr1A 121.19(19) . . ?
Si3A N4A Si4A 124.8(2) . . ?
Si4A N4A Cr1A 113.98(18) . . ?
N1A C1A C2A 124.4(4) . . ?
C1A C2A C3A 119.0(4) . . ?
C4A C3A C2A 118.2(4) . . ?
C3A C4A C5A 121.4(4) . . ?
N1A C5A C4A 119.3(4) . . ?
N1A C5A C6A 115.1(3) . . ?
C6A C5A C4A 125.7(4) . . ?
N2A C6A C5A 114.8(3) . . ?
N2A C6A C7A 120.8(4) . . ?
C7A C6A C5A 124.4(4) . . ?
C8A C7A C6A 120.4(4) . . ?
C7A C8A C9A 119.1(4) . . ?
C10A C9A C8A 117.9(4) . . ?
N2A C10A C9A 124.9(4) . . ?
N1B Cr1B N2B 76.48(14) . . ?
N1B Cr1B N3B 159.73(14) . . ?
N1B Cr1B N4B 93.21(14) . . ?
N2B Cr1B N4B 161.01(13) . . ?
N3B Cr1B N2B 91.62(13) . . ?
N3B Cr1B N4B 102.43(13) . . ?
N3B Si1B C11B 109.8(2) . . ?
N3B Si1B C12B 116.2(2) . . ?
N3B Si1B C13B 115.4(2) . . ?
C11B Si1B C12B 105.2(3) . . ?
C11B Si1B C13B 106.0(3) . . ?
C13B Si1B C12B 103.3(2) . . ?
N3B Si2B C14B 114.2(2) . . ?
N3B Si2B C15B 113.3(2) . . ?
N3B Si2B C16B 113.3(2) . . ?
C14B Si2B C15B 103.5(3) . . ?
C14B Si2B C16B 105.4(3) . . ?
C16B Si2B C15B 106.2(2) . . ?
N4B Si3B C17B 114.6(2) . . ?
N4B Si3B C18B 115.6(2) . . ?
N4B Si3B C19B 112.5(2) . . ?
C17B Si3B C18B 102.2(3) . . ?
C17B Si3B C19B 105.9(3) . . ?
C19B Si3B C18B 105.0(3) . . ?
N4B Si4B C20B 113.16(19) . . ?
N4B Si4B C21B 110.6(2) . . ?
N4B Si4B C22B 115.5(2) . . ?
C20B Si4B C21B 107.2(2) . . ?
C22B Si4B C20B 105.8(2) . . ?
C22B Si4B C21B 103.9(2) . . ?
C1B N1B Cr1B 125.6(3) . . ?
C1B N1B C5B 117.5(4) . . ?
C5B N1B Cr1B 116.9(3) . . ?
C6B N2B Cr1B 117.0(3) . . ?
C10B N2B Cr1B 126.1(3) . . ?
C10B N2B C6B 116.8(4) . . ?
Si1B N3B Cr1B 114.35(18) . . ?
Si2B N3B Cr1B 121.23(18) . . ?
Si2B N3B Si1B 124.4(2) . . ?
Si3B N4B Cr1B 122.93(18) . . ?
Si3B N4B Si4B 123.5(2) . . ?
Si4B N4B Cr1B 113.50(18) . . ?
C2B C1B N1B 123.9(5) . . ?
C1B C2B C3B 119.0(5) . . ?
C4B C3B C2B 118.8(4) . . ?
C3B C4B C5B 119.8(4) . . ?
N1B C5B C4B 121.0(4) . . ?
N1B C5B C6B 115.4(3) . . ?
C6B C5B C4B 123.5(4) . . ?
N2B C6B C5B 114.1(4) . . ?
N2B C6B C7B 120.8(4) . . ?
C5B C6B C7B 125.2(4) . . ?
C8B C7B C6B 120.6(4) . . ?
C7B C8B C9B 118.7(4) . . ?
C10B C9B C8B 118.6(4) . . ?
N2B C10B C9B 124.5(4) . . ?
O00O K003 O00O 180.0 2_557 . ?
O00O K003 O00U 120.43(9) 2_557 . ?
O00O K003 O00U 59.57(9) 2_557 2_557 ?
O00O K003 O00U 59.57(9) . . ?
O00O K003 O00U 120.43(9) . 2_557 ?
O00O K003 C033 108.08(17) 2_557 2_557 ?
O00O K003 C033 71.92(16) . 2_557 ?
O00S K003 O00O 117.35(10) . 2_557 ?
O00S K003 O00O 62.65(10) 2_557 2_557 ?
O00S K003 O00O 62.64(10) . . ?
O00S K003 O00O 117.36(10) 2_557 . ?
O00S K003 O00S 180.0 . 2_557 ?
O00S K003 O00U 120.62(10) 2_557 2_557 ?
O00S K003 O00U 120.62(10) . . ?
O00S K003 O00U 59.38(10) . 2_557 ?
O00S K003 O00U 59.38(10) 2_557 . ?
O00S K003 C033 85.40(17) 2_557 2_557 ?
O00S K003 C033 94.60(17) . 2_557 ?
O00U K003 O00U 180.0 . 2_557 ?
O00U K003 C033 99.86(12) 2_557 2_557 ?
O00U K003 C033 80.14(12) . 2_557 ?
O01V K003 O00O 82.36(15) . 2_557 ?
O01V K003 O00O 97.64(15) 2_557 2_557 ?
O01V K003 O00O 82.36(15) 2_557 . ?
O01V K003 O00O 97.64(15) . . ?
O01V K003 O00S 97.55(16) 2_557 2_557 ?
O01V K003 O00S 82.45(16) . 2_557 ?
O01V K003 O00S 97.55(16) . . ?
O01V K003 O00S 82.45(16) 2_557 . ?
O01V K003 O00U 102.09(12) 2_557 . ?
O01V K003 O00U 77.91(11) . . ?
O01V K003 O00U 102.09(12) . 2_557 ?
O01V K003 O00U 77.91(11) 2_557 2_557 ?
O01V K003 O01V 180.0 . 2_557 ?
O01V K003 C033 158.02(14) . 2_557 ?
O01V K003 C033 21.98(14) 2_557 2_557 ?
C01G O00O K003 113.2(3) . . ?
C01G O00O C02W 112.1(4) . . ?
C02W O00O K003 109.7(3) . . ?
C02G O00S K003 114.5(3) . . ?
C028 O00S K003 109.8(3) . . ?
C028 O00S C02G 110.9(3) . . ?
C01Q O00U K003 116.6(3) . . ?
C02K O00U K003 116.7(3) 2_557 . ?
C02K O00U C01Q 113.8(4) 2_557 . ?
C02N O01V K003 134.2(3) . . ?
C02N O01V C033 109.6(4) . . ?
C033 O01V K003 113.0(3) . . ?
O00O C01G C01Q 108.5(4) . . ?
C02N C01K C024 104.0(4) . . ?
O00U C01Q C01G 108.2(4) . . ?
O00S C02G C02K 108.1(4) . . ?
O00U C02K C02G 108.7(4) 2_557 . ?
O01V C02N C01K 107.9(4) . . ?
O00O C02W C028 109.3(4) . . ?
C033 C024 C01K 103.9(5) . . ?
O00S C028 C02W 108.5(4) . . ?
O01V C033 C024 105.6(5) . . ?
O00F K004 O00F 180.0 2_756 . ?
O00F K004 O00G 118.18(9) 2_756 . ?
O00F K004 O00G 61.82(9) . . ?
O00F K004 O00G 61.82(9) 2_756 2_756 ?
O00F K004 O00G 118.18(9) . 2_756 ?
O00F K004 O00H 119.12(9) . 2_756 ?
O00F K004 O00H 60.88(9) 2_756 2_756 ?
O00F K004 O00H 119.12(9) 2_756 . ?
O00F K004 O00H 60.88(9) . . ?
O00F K004 C027 89.81(12) . 2_756 ?
O00F K004 C027 90.19(12) 2_756 2_756 ?
O00G K004 O00G 180.0 . 2_756 ?
O00G K004 C027 81.23(11) . 2_756 ?
O00G K004 C027 98.77(11) 2_756 2_756 ?
O00H K004 O00G 58.97(9) 2_756 . ?
O00H K004 O00G 121.03(9) . . ?
O00H K004 O00G 58.97(9) . 2_756 ?
O00H K004 O00G 121.03(9) 2_756 2_756 ?
O00H K004 O00H 180.0 . 2_756 ?
O00H K004 C027 68.91(12) 2_756 2_756 ?
O00H K004 C027 111.09(12) . 2_756 ?
O00X K004 O00F 79.70(11) . . ?
O00X K004 O00F 100.30(11) 2_756 . ?
O00X K004 O00F 79.70(11) 2_756 2_756 ?
O00X K004 O00F 100.30(11) . 2_756 ?
O00X K004 O00G 104.57(10) 2_756 . ?
O00X K004 O00G 75.43(10) . . ?
O00X K004 O00G 75.43(10) 2_756 2_756 ?
O00X K004 O00G 104.57(10) . 2_756 ?
O00X K004 O00H 82.01(10) 2_756 2_756 ?
O00X K004 O00H 97.99(11) . 2_756 ?
O00X K004 O00H 82.01(10) . . ?
O00X K004 O00H 97.99(10) 2_756 . ?
O00X K004 O00X 180.00(15) 2_756 . ?
O00X K004 C027 156.65(12) . 2_756 ?
O00X K004 C027 23.35(12) 2_756 2_756 ?
C01D O00F K004 111.6(2) . . ?
C01H O00F K004 109.4(2) . . ?
C01H O00F C01D 110.5(3) . . ?
C01A O00G K004 111.6(2) . . ?
C01A O00G C018 113.2(3) . . ?
C018 O00G K004 115.3(2) . . ?
C01B O00H K004 114.8(2) . . ?
C015 O00H K004 117.3(2) . . ?
C015 O00H C01B 112.2(3) . . ?
C027 O00X K004 109.1(3) . . ?
C029 O00X K004 120.9(3) . . ?
C029 O00X C027 106.4(4) . . ?
O00G C01A C01H 109.1(4) . . ?
O00H C01B C01D 107.5(4) . . ?
O00F C01D C01B 109.5(4) . . ?
O00F C01H C01A 108.7(4) . . ?
C027 C01R C02L 103.9(4) . . ?
C029 C02L C01R 103.9(4) . . ?
O00H C015 C018 107.9(4) . 2_756 ?
O00G C018 C015 108.5(4) . 2_756 ?
O00X C027 C01R 104.9(4) . . ?
O00X C029 C02L 106.9(5) . . ?
O00Q K005 O00Q 180.0 2_766 . ?
O00Q K005 O00R 117.51(9) . . ?
O00Q K005 O00R 117.51(9) 2_766 2_766 ?
O00Q K005 O00R 62.49(9) . 2_766 ?
O00Q K005 O00R 62.49(9) 2_766 . ?
O00Q K005 O00W 120.57(9) 2_766 . ?
O00Q K005 O00W 120.57(9) . 2_766 ?
O00Q K005 O00W 59.43(9) . . ?
O00Q K005 O00W 59.43(9) 2_766 2_766 ?
O00Q K005 C02P 41.63(10) . 2_766 ?
O00Q K005 C02P 138.37(10) 2_766 2_766 ?
O00Q K005 C030 98.44(15) . 2_766 ?
O00Q K005 C030 81.56(15) 2_766 2_766 ?
O00R K005 O00R 180.00(11) 2_766 . ?
O00R K005 O00W 120.47(9) 2_766 . ?
O00R K005 O00W 59.53(9) . . ?
O00R K005 O00W 59.53(9) 2_766 2_766 ?
O00R K005 O00W 120.47(9) . 2_766 ?
O00R K005 C02P 157.54(10) . 2_766 ?
O00R K005 C02P 22.46(10) 2_766 2_766 ?
O00R K005 C030 104.64(15) . 2_766 ?
O00R K005 C030 75.36(15) 2_766 2_766 ?
O00W K005 O00W 180.0 . 2_766 ?
O00W K005 C02P 78.98(10) 2_766 2_766 ?
O00W K005 C02P 101.02(10) . 2_766 ?
O00W K005 C030 100.92(12) . 2_766 ?
O00W K005 C030 79.08(12) 2_766 2_766 ?
O013 K005 O00Q 94.23(13) . 2_766 ?
O013 K005 O00Q 85.77(13) 2_766 2_766 ?
O013 K005 O00Q 85.77(13) . . ?
O013 K005 O00Q 94.23(13) 2_766 . ?
O013 K005 O00R 86.60(14) . 2_766 ?
O013 K005 O00R 93.40(13) . . ?
O013 K005 O00R 93.40(13) 2_766 2_766 ?
O013 K005 O00R 86.60(13) 2_766 . ?
O013 K005 O00W 79.08(11) . 2_766 ?
O013 K005 O00W 79.08(11) 2_766 . ?
O013 K005 O00W 100.92(11) 2_766 2_766 ?
O013 K005 O00W 100.92(11) . . ?
O013 K005 O013 180.0 . 2_766 ?
O013 K005 C02P 101.36(15) 2_766 2_766 ?
O013 K005 C02P 78.64(15) . 2_766 ?
O013 K005 C030 156.69(14) . 2_766 ?
O013 K005 C030 23.30(14) 2_766 2_766 ?
C030 K005 C02P 89.30(16) 2_766 2_766 ?
C02A O00Q K005 111.8(3) . . ?
C02A O00Q C02V 111.8(3) . . ?
C02V O00Q K005 116.6(3) . . ?
C01Y O00R K005 113.6(3) . . ?
C02P O00R K005 108.5(2) . . ?
C02P O00R C01Y 111.0(4) . . ?
C01O O00W K005 116.6(3) . . ?
C01O O00W C023 113.0(4) . . ?
C023 O00W K005 116.6(2) . . ?
C02T O013 K005 132.1(3) . . ?
C02T O013 C030 107.4(4) . . ?
C030 O013 K005 109.5(3) . . ?
O00W C01O C02V 106.6(4) . . ?
O00R C01Y C023 108.1(4) . . ?
O00Q C02A C02P 108.8(4) . 2_766 ?
O00R C02P C02A 110.0(4) . 2_766 ?
O013 C02T C03B 107.1(5) . . ?
O00Q C02V C01O 107.8(4) . . ?
C02T C03B C03D 107.0(7) . . ?
C030 C03D C03B 99.5(6) . . ?
O00W C023 C01Y 108.0(4) . . ?
O013 C030 C03D 104.8(5) . . ?
O00I K006 O00I 180.0 2_767 . ?
O00I K006 C02Z 67.72(14) 2_767 2_767 ?
O00I K006 C02Z 112.28(14) . 2_767 ?
O00K K006 O00I 119.66(10) 2_767 . ?
O00K K006 O00I 60.34(10) . . ?
O00K K006 O00I 60.34(10) 2_767 2_767 ?
O00K K006 O00I 119.66(10) . 2_767 ?
O00K K006 O00K 180.0 2_767 . ?
O00K K006 C02Z 88.62(15) . 2_767 ?
O00K K006 C02Z 91.38(15) 2_767 2_767 ?
O00L K006 O00I 59.07(10) . . ?
O00L K006 O00I 120.94(10) . 2_767 ?
O00L K006 O00I 59.06(10) 2_767 2_767 ?
O00L K006 O00I 120.93(10) 2_767 . ?
O00L K006 O00K 62.13(10) . 2_767 ?
O00L K006 O00K 62.13(10) 2_767 . ?
O00L K006 O00K 117.87(10) 2_767 2_767 ?
O00L K006 O00K 117.87(10) . . ?
O00L K006 O00L 180.00(8) . 2_767 ?
O00L K006 C02Z 78.09(13) 2_767 2_767 ?
O00L K006 C02Z 101.91(13) . 2_767 ?
O017 K006 O00I 97.63(14) 2_767 . ?
O017 K006 O00I 82.37(14) 2_767 2_767 ?
O017 K006 O00I 97.63(14) . 2_767 ?
O017 K006 O00I 82.37(14) . . ?
O017 K006 O00K 95.75(15) . 2_767 ?
O017 K006 O00K 84.25(15) 2_767 2_767 ?
O017 K006 O00K 95.74(15) 2_767 . ?
O017 K006 O00K 84.26(15) . . ?
O017 K006 O00L 100.16(12) 2_767 2_767 ?
O017 K006 O00L 79.84(12) . 2_767 ?
O017 K006 O00L 79.84(12) 2_767 . ?
O017 K006 O00L 100.16(12) . . ?
O017 K006 O017 180.0(2) . 2_767 ?
O017 K006 C02Z 22.36(14) 2_767 2_767 ?
O017 K006 C02Z 157.64(15) . 2_767 ?
C02C O00I K006 115.9(3) . . ?
C020 O00I K006 113.9(3) . . ?
C020 O00I C02C 113.0(4) . . ?
C01F O00K K006 109.2(3) . . ?
C01F O00K C02F 112.4(4) . . ?
C02F O00K K006 112.5(3) . . ?
C01E O00L K006 112.2(3) . . ?
C01I O00L K006 117.9(3) . . ?
C01I O00L C01E 112.5(4) . . ?
C02Z O017 K006 112.4(4) . . ?
C03C O017 K006 135.0(4) . . ?
C03C O017 C02Z 109.0(5) . . ?
O00L C01E C01F 107.8(4) . 2_767 ?
O00K C01F C01E 111.0(4) . 2_767 ?
O00L C01I C02C 108.6(4) . . ?
C03A C01M C02Z 103.5(5) . . ?
O00I C02C C01I 108.4(4) . . ?
O00K C02F C020 108.1(5) . . ?
O017 C02Z C01M 105.8(5) . . ?
C03C C03A C01M 108.1(6) . . ?
O017 C03C C03A 108.6(6) . . ?
O00I C020 C02F 109.6(4) . . ?

_shelx_res_file                  
;
    k{18c6}cr5.res created by SHELXL-2014/7

TITL pimx005_a.res in P-1
REM Old TITL
REM SHELXT solution in P-1
REM R1 0.442, Rweak 0.086, Alpha 0.159, Orientation as input
REM Formula found by SHELXT: K2 Cr2 O18 C85 N5 Si8
CELL 0.71073 11.6269 21.5546 21.856 95.633 89.892 90.377
ZERR 4 0.0002 0.0004 0.0004 0.002 0.001 0.002
LATT 1
SFAC C H Cr K N O Si
UNIT 168 336 4 4 16 32 16

L.S. 5
PLAN  1
SIZE 0.2027 0.2903 0.3494
TEMP -173.15
FREE K005 C02A
FREE K005 C02P
FREE K005 C030
FREE C02V C02A
FREE K006 C02F
FREE K006 C02Z
FREE K006 C01F
FREE K003 C033
FREE K003 C02W
FREE K004 C029
FREE K004 C01H
FREE K004 C027
list 4
fmap 2
acta
TWIN 1 0 0 0 -1 0 0 0 -1 2
OMIT 0 54
REM <olex2.extras>
REM <HklSrc "%.\\PIMX005.hkl">
REM </olex2.extras>

WGHT    0.040900   12.469600
BASF   0.35628
FVAR       0.11984
CR1A  3    0.615209    0.249102    0.740738    11.00000    0.02024    0.03585 =
         0.02309    0.00154   -0.00128    0.00253
SI1A  7    0.521928    0.133839    0.806884    11.00000    0.02560    0.03816 =
         0.03182    0.00610   -0.00189    0.00291
SI2A  7    0.438838    0.255999    0.863393    11.00000    0.03071    0.04680 =
         0.02480   -0.00012    0.00285    0.00264
SI3A  7    0.387507    0.241768    0.650871    11.00000    0.02500    0.03812 =
         0.02925   -0.00108   -0.00586    0.00190
SI4A  7    0.508520    0.364631    0.682042    11.00000    0.02511    0.03521 =
         0.03544    0.00333   -0.00096    0.00349
N1A   5    0.743427    0.255848    0.674590    11.00000    0.01943    0.03352 =
         0.02721    0.00294   -0.00052    0.00359
N2A   5    0.765143    0.242737    0.790834    11.00000    0.02173    0.03686 =
         0.03224    0.00392   -0.00625   -0.00074
N3A   5    0.512915    0.211944    0.807813    11.00000    0.02343    0.03916 =
         0.01954    0.00279    0.00054    0.00128
N4A   5    0.493565    0.286679    0.685802    11.00000    0.01750    0.03513 =
         0.02702    0.00132   -0.00293    0.00276
C1A   1    0.727169    0.256374    0.613858    11.00000    0.02863    0.03859 =
         0.02886    0.00462   -0.00184   -0.00189
AFIX  43
H1A   2    0.650399    0.253682    0.598983    11.00000   -1.20000
AFIX   0
C2A   1    0.813941    0.260537    0.571839    11.00000    0.03017    0.04434 =
         0.02553    0.00318    0.00017    0.00043
AFIX  43
H2A   2    0.797037    0.260330    0.529310    11.00000   -1.20000
AFIX   0
C3A   1    0.928269    0.265116    0.592666    11.00000    0.03020    0.04399 =
         0.03711    0.00428    0.00566    0.00158
AFIX  43
H3A   2    0.990044    0.269101    0.564782    11.00000   -1.20000
AFIX   0
C4A   1    0.948086    0.263683    0.653906    11.00000    0.02245    0.03887 =
         0.03504   -0.00275    0.00333   -0.00053
AFIX  43
H4A   2    1.024789    0.267095    0.668818    11.00000   -1.20000
AFIX   0
C5A   1    0.856527    0.257198    0.695938    11.00000    0.02172    0.03203 =
         0.02728   -0.00257   -0.00091    0.00173
C6A   1    0.868631    0.251417    0.759614    11.00000    0.02100    0.02780 =
         0.03061    0.00014   -0.00207    0.00520
C7A   1    0.974884    0.252269    0.790717    11.00000    0.02161    0.03891 =
         0.03972   -0.00172   -0.00365   -0.00053
AFIX  43
H7A   2    1.044127    0.258983    0.769113    11.00000   -1.20000
AFIX   0
C8A   1    0.978764    0.243563    0.851253    11.00000    0.03082    0.04355 =
         0.04068    0.00105   -0.01032   -0.00219
AFIX  43
H8A   2    1.050373    0.243508    0.872107    11.00000   -1.20000
AFIX   0
C9A   1    0.873943    0.234490    0.883206    11.00000    0.03821    0.04686 =
         0.03466    0.00609   -0.01216    0.00040
AFIX  43
H9A   2    0.873912    0.228208    0.925625    11.00000   -1.20000
AFIX   0
C10A  1    0.772657    0.235115    0.850643    11.00000    0.02732    0.04806 =
         0.03069    0.00492   -0.00151   -0.00202
AFIX  43
H10A  2    0.702977    0.229725    0.872322    11.00000   -1.20000
AFIX   0
C11A  1    0.527737    0.280869    0.934259    11.00000    0.05539    0.11759 =
         0.03852   -0.01610    0.00262   -0.00311
AFIX 137
H11A  2    0.573441    0.245546    0.945170    11.00000   -1.50000
H11B  2    0.476542    0.294741    0.968496    11.00000   -1.50000
H11C  2    0.579207    0.315184    0.925762    11.00000   -1.50000
AFIX   0
C12A  1    0.382331    0.330030    0.840730    11.00000    0.07152    0.05607 =
         0.04349   -0.00249    0.01498    0.01447
AFIX 137
H12A  2    0.441782    0.350933    0.818246    11.00000   -1.50000
H12B  2    0.360252    0.356938    0.877579    11.00000   -1.50000
H12C  2    0.314897    0.321602    0.814310    11.00000   -1.50000
AFIX   0
C13A  1    0.310794    0.214030    0.893709    11.00000    0.04698    0.07322 =
         0.06263    0.00738    0.01850    0.00160
AFIX 137
H13A  2    0.261591    0.197961    0.859310    11.00000   -1.50000
H13B  2    0.266882    0.243078    0.921933    11.00000   -1.50000
H13C  2    0.337497    0.179284    0.915609    11.00000   -1.50000
AFIX   0
C14A  1    0.565976    0.106259    0.883366    11.00000    0.05212    0.05699 =
         0.04763    0.01660   -0.00655    0.00068
AFIX 137
H14A  2    0.639350    0.125789    0.896547    11.00000   -1.50000
H14B  2    0.574483    0.060836    0.878701    11.00000   -1.50000
H14C  2    0.506807    0.117931    0.914286    11.00000   -1.50000
AFIX   0
C15A  1    0.634937    0.101371    0.750383    11.00000    0.03589    0.04582 =
         0.04961   -0.00151    0.00140    0.01038
AFIX 137
H15A  2    0.629429    0.122013    0.712503    11.00000   -1.50000
H15B  2    0.622456    0.056445    0.740941    11.00000   -1.50000
H15C  2    0.711477    0.108831    0.768431    11.00000   -1.50000
AFIX   0
C16A  1    0.385998    0.090470    0.786321    11.00000    0.04145    0.04622 =
         0.06895    0.00690   -0.01123   -0.00503
AFIX 137
H16A  2    0.326400    0.103312    0.816630    11.00000   -1.50000
H16B  2    0.399339    0.045601    0.786081    11.00000   -1.50000
H16C  2    0.360787    0.099695    0.745441    11.00000   -1.50000
AFIX   0
C17A  1    0.263215    0.227961    0.703846    11.00000    0.02661    0.05428 =
         0.05340   -0.00296   -0.00102   -0.00064
AFIX 137
H17A  2    0.292401    0.211891    0.741217    11.00000   -1.50000
H17B  2    0.209839    0.197532    0.682973    11.00000   -1.50000
H17C  2    0.222967    0.267302    0.714811    11.00000   -1.50000
AFIX   0
C18A  1    0.439210    0.162634    0.619414    11.00000    0.03869    0.04550 =
         0.04930   -0.00758    0.00037    0.00191
AFIX 137
H18A  2    0.506983    0.167221    0.593475    11.00000   -1.50000
H18B  2    0.378076    0.140904    0.594856    11.00000   -1.50000
H18C  2    0.459559    0.138471    0.653492    11.00000   -1.50000
AFIX   0
C19A  1    0.320334    0.274182    0.582982    11.00000    0.05897    0.06289 =
         0.04927    0.00047   -0.02321    0.00178
AFIX 137
H19A  2    0.277239    0.311885    0.596908    11.00000   -1.50000
H19B  2    0.267974    0.243077    0.562312    11.00000   -1.50000
H19C  2    0.380676    0.284526    0.554238    11.00000   -1.50000
AFIX   0
C20A  1    0.372596    0.409231    0.698787    11.00000    0.03542    0.04107 =
         0.06482    0.00114    0.00477    0.00946
AFIX 137
H20A  2    0.308912    0.387996    0.675878    11.00000   -1.50000
H20B  2    0.381629    0.451438    0.686310    11.00000   -1.50000
H20C  2    0.356090    0.411606    0.742940    11.00000   -1.50000
AFIX   0
C21A  1    0.555000    0.389150    0.604747    11.00000    0.04514    0.05062 =
         0.05808    0.02627    0.00097   -0.00284
AFIX 137
H21A  2    0.628109    0.369164    0.592571    11.00000   -1.50000
H21B  2    0.564711    0.434547    0.607822    11.00000   -1.50000
H21C  2    0.496210    0.376415    0.573888    11.00000   -1.50000
AFIX   0
C22A  1    0.621179    0.398356    0.736604    11.00000    0.04062    0.04426 =
         0.05600   -0.00273   -0.01174   -0.00147
AFIX 137
H22A  2    0.598803    0.391812    0.778755    11.00000   -1.50000
H22B  2    0.629058    0.443136    0.732943    11.00000   -1.50000
H22C  2    0.694778    0.377813    0.726738    11.00000   -1.50000
AFIX   0

CR1B  3    1.399719    0.246212    0.252252    11.00000    0.02063    0.03051 =
         0.02555    0.00296   -0.00066    0.00164
SI1B  7    1.513618    0.197813    0.370816    11.00000    0.02772    0.03884 =
         0.02483    0.00518   -0.00111    0.00153
SI2B  7    1.617392    0.149199    0.250450    11.00000    0.02837    0.03635 =
         0.02865   -0.00018   -0.00307    0.00713
SI3B  7    1.575353    0.369688    0.257466    11.00000    0.03207    0.03256 =
         0.02564   -0.00062    0.00114   -0.00348
SI4B  7    1.495936    0.308203    0.136062    11.00000    0.02740    0.03412 =
         0.02406    0.00223   -0.00242    0.00224
N1B   5    1.247534    0.293560    0.240013    11.00000    0.02526    0.03536 =
         0.02970    0.00306   -0.00014    0.00380
N2B   5    1.272679    0.179116    0.262043    11.00000    0.02159    0.03144 =
         0.02747    0.00429   -0.00045    0.00174
N3B   5    1.522306    0.193608    0.293176    11.00000    0.02386    0.02970 =
         0.02430    0.00152   -0.00447    0.00174
N4B   5    1.500827    0.313505    0.214121    11.00000    0.02480    0.02960 =
         0.02566    0.00227    0.00006    0.00118
C1B   1    1.239483    0.354203    0.227882    11.00000    0.03600    0.03432 =
         0.03630    0.00043    0.00103    0.00665
AFIX  43
H1B   2    1.308769    0.376999    0.223631    11.00000   -1.20000
AFIX   0
C2B   1    1.138253    0.383965    0.221514    11.00000    0.03862    0.04219 =
         0.04221    0.00208   -0.00248    0.01283
AFIX  43
H2B   2    1.137456    0.426226    0.212622    11.00000   -1.20000
AFIX   0
C3B   1    1.033642    0.350998    0.228339    11.00000    0.03209    0.05071 =
         0.03964    0.00018   -0.00406    0.01173
AFIX  43
H3B   2    0.961748    0.371104    0.225113    11.00000   -1.20000
AFIX   0
C4B   1    1.038208    0.290023    0.239594    11.00000    0.02570    0.04385 =
         0.03208   -0.00381   -0.00119    0.00662
AFIX  43
H4B   2    0.969170    0.266793    0.243024    11.00000   -1.20000
AFIX   0
C5B   1    1.146694    0.261184    0.246207    11.00000    0.02281    0.03199 =
         0.02378    0.00009    0.00093    0.00377
C6B   1    1.159417    0.197517    0.256527    11.00000    0.02023    0.03857 =
         0.02226    0.00205   -0.00072   -0.00158
C7B   1    1.066959    0.154495    0.262045    11.00000    0.02207    0.04869 =
         0.02786   -0.00064   -0.00024   -0.00355
AFIX  43
H7B   2    0.989795    0.168151    0.259254    11.00000   -1.20000
AFIX   0
C8B   1    1.088236    0.094302    0.271234    11.00000    0.02997    0.04183 =
         0.03628   -0.00078    0.00167   -0.00550
AFIX  43
H8B   2    1.026715    0.065790    0.275387    11.00000   -1.20000
AFIX   0
C9B   1    1.203938    0.074800    0.274516    11.00000    0.03308    0.03661 =
         0.03775    0.00424   -0.00494   -0.00377
AFIX  43
H9B   2    1.221650    0.032712    0.279873    11.00000   -1.20000
AFIX   0
C10B  1    1.290467    0.118255    0.269765    11.00000    0.02824    0.02975 =
         0.03620    0.00354   -0.00191   -0.00242
AFIX  43
H10B  2    1.367715    0.104592    0.272062    11.00000   -1.20000
AFIX   0
C11B  1    1.423079    0.265740    0.400068    11.00000    0.05891    0.05674 =
         0.03566    0.00463    0.01053    0.01534
AFIX 137
H11D  2    1.462808    0.304586    0.392805    11.00000   -1.50000
H11E  2    1.409817    0.264760    0.444258    11.00000   -1.50000
H11F  2    1.349149    0.263483    0.378478    11.00000   -1.50000
AFIX   0
C12B  1    1.446518    0.128195    0.403993    11.00000    0.04392    0.05748 =
         0.03656    0.01582   -0.00659   -0.01378
AFIX 137
H12D  2    1.369473    0.120513    0.386659    11.00000   -1.50000
H12E  2    1.440880    0.136624    0.448778    11.00000   -1.50000
H12F  2    1.494457    0.091403    0.393720    11.00000   -1.50000
AFIX   0
C13B  1    1.654489    0.208305    0.412633    11.00000    0.04490    0.06240 =
         0.03271    0.00795   -0.01045   -0.00975
AFIX 137
H13D  2    1.702797    0.171723    0.402032    11.00000   -1.50000
H13E  2    1.640411    0.213046    0.457064    11.00000   -1.50000
H13F  2    1.693743    0.245620    0.400615    11.00000   -1.50000
AFIX   0
C14B  1    1.671046    0.080453    0.288058    11.00000    0.10730    0.06224 =
         0.04502    0.00483    0.00871    0.05117
AFIX 137
H14D  2    1.711740    0.095036    0.326049    11.00000   -1.50000
H14E  2    1.723673    0.056280    0.260067    11.00000   -1.50000
H14F  2    1.605774    0.054103    0.297721    11.00000   -1.50000
AFIX   0
C15B  1    1.753502    0.192513    0.233068    11.00000    0.02458    0.07335 =
         0.04593   -0.01451    0.00112    0.00208
AFIX 137
H15D  2    1.735877    0.224160    0.205259    11.00000   -1.50000
H15E  2    1.809518    0.163080    0.213519    11.00000   -1.50000
H15F  2    1.785724    0.212771    0.271408    11.00000   -1.50000
AFIX   0
C16B  1    1.558113    0.116148    0.174210    11.00000    0.04160    0.04892 =
         0.03482   -0.01030   -0.00132   -0.00196
AFIX 137
H16D  2    1.483256    0.096531    0.180380    11.00000   -1.50000
H16E  2    1.611273    0.084942    0.154961    11.00000   -1.50000
H16F  2    1.548863    0.149716    0.147488    11.00000   -1.50000
AFIX   0
C17B  1    1.695956    0.340167    0.302446    11.00000    0.04200    0.05326 =
         0.04976   -0.00531   -0.01477   -0.00559
AFIX 137
H17D  2    1.666508    0.308906    0.328258    11.00000   -1.50000
H17E  2    1.730540    0.374884    0.328556    11.00000   -1.50000
H17F  2    1.754201    0.321197    0.274162    11.00000   -1.50000
AFIX   0
C18B  1    1.649643    0.429449    0.213615    11.00000    0.07001    0.05245 =
         0.03831   -0.00108   -0.00007   -0.03197
AFIX 137
H18D  2    1.690421    0.408356    0.178282    11.00000   -1.50000
H18E  2    1.704766    0.453289    0.240606    11.00000   -1.50000
H18F  2    1.592391    0.457791    0.199145    11.00000   -1.50000
AFIX   0
C19B  1    1.481590    0.416054    0.315013    11.00000    0.05421    0.04754 =
         0.04834   -0.00815    0.00559    0.00183
AFIX 137
H19D  2    1.432553    0.443831    0.293716    11.00000   -1.50000
H19E  2    1.530020    0.440904    0.344937    11.00000   -1.50000
H19F  2    1.433300    0.387604    0.336395    11.00000   -1.50000
AFIX   0
C20B  1    1.638443    0.286569    0.098686    11.00000    0.03771    0.06336 =
         0.02983    0.00533    0.00268    0.01084
AFIX 137
H20D  2    1.697027    0.317250    0.113621    11.00000   -1.50000
H20E  2    1.631262    0.286067    0.053971    11.00000   -1.50000
H20F  2    1.661053    0.245153    0.109053    11.00000   -1.50000
AFIX   0
C21B  1    1.387685    0.247109    0.105662    11.00000    0.04661    0.04547 =
         0.03680    0.00024   -0.01235   -0.00406
AFIX 137
H21D  2    1.399609    0.208872    0.125590    11.00000   -1.50000
H21E  2    1.397581    0.238229    0.061131    11.00000   -1.50000
H21F  2    1.309712    0.262533    0.114495    11.00000   -1.50000
AFIX   0
C22B  1    1.448604    0.380562    0.102111    11.00000    0.04197    0.04283 =
         0.03509    0.00978   -0.00341    0.00191
AFIX 137
H22D  2    1.377969    0.396216    0.122542    11.00000   -1.50000
H22E  2    1.434032    0.370790    0.058059    11.00000   -1.50000
H22F  2    1.509111    0.412445    0.108014    11.00000   -1.50000
AFIX   0

K003  4    0.000000    0.000000    1.000000    10.50000    0.02843    0.03584 =
         0.02551   -0.00078   -0.00113    0.00264
O00O  6   -0.185162    0.068214    1.054483    11.00000    0.03369    0.04334 =
         0.03389   -0.00023   -0.00641    0.00837
O00S  6    0.050686    0.115498    1.065680    11.00000    0.04205    0.03920 =
         0.02930   -0.00224   -0.00023    0.00063
O00U  6   -0.227752   -0.032080    0.966273    11.00000    0.02899    0.04880 =
         0.03447   -0.00648    0.00258   -0.00217
O01V  6   -0.014533    0.039846    0.888724    11.00000    0.04584    0.16999 =
         0.08423    0.08682   -0.02168   -0.03971
C01G  1   -0.286701    0.063430    1.017916    11.00000    0.03472    0.05799 =
         0.03277   -0.00042   -0.00236    0.01247
AFIX  23
H01A  2   -0.273585    0.082755    0.979214    11.00000   -1.20000
H01B  2   -0.350720    0.085528    1.040419    11.00000   -1.20000
AFIX   0
C01K  1   -0.054144    0.076580    0.794300    11.00000    0.03530    0.03921 =
         0.04285    0.00668   -0.00184    0.00130
AFIX  23
H01C  2   -0.080160    0.119385    0.789100    11.00000   -1.20000
H01D  2   -0.076561    0.048642    0.757531    11.00000   -1.20000
AFIX   0
C01Q  1   -0.316264   -0.003442    1.004084    11.00000    0.02114    0.06293 =
         0.03518   -0.00501    0.00137    0.00395
AFIX  23
H01E  2   -0.322566   -0.023684    1.042710    11.00000   -1.20000
H01F  2   -0.391041   -0.007910    0.982457    11.00000   -1.20000
AFIX   0
C02G  1    0.158918    0.117806    1.097814    11.00000    0.04008    0.04341 =
         0.03468   -0.00528   -0.00772   -0.00610
AFIX  23
H02A  2    0.155439    0.091071    1.132115    11.00000   -1.20000
H02B  2    0.176123    0.161070    1.115023    11.00000   -1.20000
AFIX   0
C02K  1    0.249510    0.095382    1.053562    11.00000    0.03863    0.04439 =
         0.04551   -0.00332   -0.00424   -0.00920
AFIX  23
H02C  2    0.249302    0.120377    1.017903    11.00000   -1.20000
H02D  2    0.325939    0.099910    1.073449    11.00000   -1.20000
AFIX   0
C02N  1   -0.104145    0.054005    0.851872    11.00000    0.03885    0.06729 =
         0.05623    0.01933    0.00171    0.00101
AFIX  23
H02E  2   -0.152487    0.086843    0.873568    11.00000   -1.20000
H02F  2   -0.152678    0.016584    0.841332    11.00000   -1.20000
AFIX   0
C02W  1   -0.150634    0.131616    1.070027    11.00000    0.05063    0.03775 =
         0.03750   -0.00600   -0.00620    0.01365
AFIX  23
H02G  2   -0.211509    0.154180    1.094709    11.00000   -1.20000
H02H  2   -0.138866    0.152451    1.032081    11.00000   -1.20000
AFIX   0
C024  1    0.074772    0.075167    0.804479    11.00000    0.03618    0.07566 =
         0.05204    0.01818   -0.00378   -0.00423
AFIX  23
H02I  2    0.109689    0.038760    0.780391    11.00000   -1.20000
H02J  2    0.111924    0.113716    0.792703    11.00000   -1.20000
AFIX   0
C028  1   -0.040486    0.133158    1.106324    11.00000    0.04204    0.03721 =
         0.03427   -0.00457   -0.00029    0.00792
AFIX  23
H02K  2   -0.026505    0.175673    1.126531    11.00000   -1.20000
H02L  2   -0.045989    0.104067    1.138571    11.00000   -1.20000
AFIX   0
C033  1    0.086313    0.070391    0.871313    11.00000    0.04538    0.13003 =
         0.07410    0.05767   -0.01431   -0.03505
AFIX  23
H03A  2    0.155305    0.046020    0.879900    11.00000   -1.20000
H03B  2    0.092913    0.112330    0.893995    11.00000   -1.20000
AFIX   0

K004  4    1.000000    0.000000    0.500000    10.50000    0.02732    0.03153 =
         0.02988    0.00038   -0.00365    0.00278
O00F  6    0.957356    0.059764    0.618063    11.00000    0.03125    0.03779 =
         0.03214   -0.00322   -0.00460    0.00277
O00G  6    1.190230    0.039704    0.573895    11.00000    0.02959    0.04590 =
         0.02847    0.00258   -0.00542    0.00602
O00H  6    0.776936    0.043741    0.529533    11.00000    0.02879    0.04176 =
         0.02867    0.00022   -0.00105    0.00001
O00X  6    1.032885    0.118182    0.479151    11.00000    0.03763    0.05517 =
         0.06564    0.02768   -0.00412    0.00062
C01A  1    1.157535    0.054888    0.636027    11.00000    0.03472    0.04762 =
         0.02492   -0.00229   -0.00639   -0.00043
AFIX  23
H01G  2    1.221812    0.076436    0.659133    11.00000   -1.20000
H01H  2    1.138963    0.016343    0.655290    11.00000   -1.20000
AFIX   0
C01B  1    0.756318    0.058882    0.593254    11.00000    0.02730    0.04835 =
         0.03287   -0.00396    0.00311    0.00653
AFIX  23
H01I  2    0.749217    0.020381    0.614263    11.00000   -1.20000
H01J  2    0.684047    0.082711    0.599522    11.00000   -1.20000
AFIX   0
C01D  1    0.857086    0.097698    0.618954    11.00000    0.03011    0.04643 =
         0.03221   -0.00777   -0.00078    0.00633
AFIX  23
H01K  2    0.870458    0.132967    0.593963    11.00000   -1.20000
H01L  2    0.840105    0.114929    0.661654    11.00000   -1.20000
AFIX   0
C01H  1    1.055066    0.096171    0.638209    11.00000    0.03255    0.03980 =
         0.02952   -0.00515   -0.00265   -0.00386
AFIX  23
H01M  2    1.042683    0.115390    0.680714    11.00000   -1.20000
H01N  2    1.067365    0.129934    0.611236    11.00000   -1.20000
AFIX   0
C01R  1    0.985696    0.198757    0.419828    11.00000    0.04310    0.04009 =
         0.03396    0.00637    0.00146    0.00630
AFIX  23
H01O  2    0.949739    0.232674    0.447014    11.00000   -1.20000
H01P  2    0.965516    0.203887    0.376636    11.00000   -1.20000
AFIX   0
C02L  1    1.116057    0.198658    0.428528    11.00000    0.04833    0.05055 =
         0.03739    0.00558   -0.00174   -0.00843
AFIX  23
H02M  2    1.156348    0.198939    0.388610    11.00000   -1.20000
H02N  2    1.141530    0.235289    0.456172    11.00000   -1.20000
AFIX   0
C015  1    0.683437    0.010802    0.499783    11.00000    0.02227    0.04114 =
         0.04061   -0.00098   -0.00103    0.00109
AFIX  23
H01Q  2    0.612159    0.035573    0.505583    11.00000   -1.20000
H01R  2    0.671239   -0.029352    0.517353    11.00000   -1.20000
AFIX   0
C018  1    1.288212    0.000545    0.567160    11.00000    0.02859    0.03924 =
         0.03756    0.00401   -0.00863   -0.00115
AFIX  23
H01S  2    1.271779   -0.039524    0.584114    11.00000   -1.20000
H01T  2    1.354193    0.020824    0.589856    11.00000   -1.20000
AFIX   0
C027  1    0.947516    0.135330    0.437226    11.00000    0.03754    0.05368 =
         0.05928    0.01597   -0.01135   -0.00554
AFIX  23
H02O  2    0.870831    0.137873    0.457044    11.00000   -1.20000
H02P  2    0.943868    0.104645    0.400468    11.00000   -1.20000
AFIX   0
C029  1    1.138643    0.138375    0.457204    11.00000    0.03646    0.07961 =
         0.06815    0.02989    0.00435    0.00215
AFIX  23
H02Q  2    1.170528    0.106541    0.426143    11.00000   -1.20000
H02R  2    1.194419    0.145744    0.491355    11.00000   -1.20000
AFIX   0

K005  4    1.000000    0.500000    0.500000    10.50000    0.02646    0.03612 =
         0.02711   -0.00188    0.00034    0.00343
O00Q  6    1.094616    0.393110    0.440372    11.00000    0.03326    0.04011 =
         0.03422   -0.00563    0.00302   -0.00028
O00R  6    1.150422    0.585616    0.564148    11.00000    0.03412    0.03681 =
         0.03660    0.00088   -0.00437    0.00024
O00W  6    1.240208    0.490746    0.481536    11.00000    0.03033    0.04067 =
         0.04082   -0.00054   -0.00057    0.00473
O013  6    0.972497    0.433243    0.595407    11.00000    0.03827    0.13581 =
         0.05839    0.04563    0.00788    0.01582
C01O  1    1.284237    0.430265    0.466570    11.00000    0.02947    0.03632 =
         0.06203   -0.00161    0.00541    0.01188
AFIX  23
H01U  2    1.282287    0.406369    0.503001    11.00000   -1.20000
H01V  2    1.364774    0.432530    0.452133    11.00000   -1.20000
AFIX   0
C01Y  1    1.259036    0.591485    0.534183    11.00000    0.03537    0.04356 =
         0.03923    0.00164    0.00371   -0.00870
AFIX  23
H01W  2    1.310267    0.619959    0.560079    11.00000   -1.20000
H01X  2    1.248064    0.608852    0.494331    11.00000   -1.20000
AFIX   0
C02A  1    1.018308    0.363209    0.396708    11.00000    0.04683    0.03653 =
         0.03042    0.00044   -0.00227    0.00681
AFIX  23
H02S  2    1.048848    0.321875    0.381116    11.00000   -1.20000
H02T  2    1.010016    0.388445    0.361510    11.00000   -1.20000
AFIX   0
C02P  1    1.094548    0.644239    0.573744    11.00000    0.03524    0.03151 =
         0.03678   -0.00284   -0.00390    0.00252
AFIX  23
H02U  2    1.083829    0.661548    0.533844    11.00000   -1.20000
H02V  2    1.142872    0.673780    0.600216    11.00000   -1.20000
AFIX   0
C02T  1    0.884107    0.431936    0.640138    11.00000    0.03911    0.05171 =
         0.05222    0.01327    0.00269    0.00474
AFIX  23
H02W  2    0.847000    0.390284    0.637298    11.00000   -1.20000
H02X  2    0.824791    0.463338    0.633555    11.00000   -1.20000
AFIX   0
C02V  1    1.207670    0.398965    0.415591    11.00000    0.03413    0.04497 =
         0.04880   -0.00803    0.00923    0.00688
AFIX  23
H02Y  2    1.205634    0.424512    0.380361    11.00000   -1.20000
H     2    1.238163    0.357327    0.401036    11.00000   -1.20000
AFIX   0
C03B  1    0.937685    0.445940    0.700184    11.00000    0.03840    0.17170 =
         0.07546   -0.05440   -0.00268   -0.00439
AFIX  23
H03C  2    0.935006    0.408862    0.723546    11.00000   -1.20000
H03D  2    0.896845    0.480465    0.724112    11.00000   -1.20000
AFIX   0
C03D  1    1.061968    0.464584    0.688787    11.00000    0.04920    0.08887 =
         0.11399    0.00028   -0.02418   -0.01130
AFIX  23
H03E  2    1.070531    0.510145    0.687346    11.00000   -1.20000
H03F  2    1.114677    0.450539    0.720094    11.00000   -1.20000
AFIX   0
C023  1    1.311243    0.528355    0.524083    11.00000    0.02731    0.04815 =
         0.04068    0.00292   -0.00067   -0.00236
AFIX  23
H02Z  2    1.389989    0.531406    0.507282    11.00000   -1.20000
HA    2    1.315902    0.509439    0.563483    11.00000   -1.20000
AFIX   0
C030  1    1.080361    0.429315    0.626653    11.00000    0.03485    0.10888 =
         0.06101    0.03438    0.00745    0.00599
AFIX  23
H03G  2    1.142909    0.448605    0.604079    11.00000   -1.20000
H03H  2    1.100223    0.385335    0.630809    11.00000   -1.20000
AFIX   0

K006  4    1.000000    0.500000    1.000000    10.50000    0.03257    0.03474 =
         0.03763    0.00408    0.00354    0.00276
O00I  6    0.777520    0.455826    0.964361    11.00000    0.03555    0.05205 =
         0.04014    0.01096   -0.00173    0.00074
O00K  6    0.962356    0.446379    0.878882    11.00000    0.03992    0.04697 =
         0.04141   -0.00287    0.00424   -0.00113
O00L  6    0.807650    0.532923    1.072529    11.00000    0.03904    0.04355 =
         0.04378    0.00817    0.01078    0.00404
O017  6    1.026467    0.383018    1.024746    11.00000    0.05990    0.06099 =
         0.13346    0.04366    0.03172    0.01395
C01E  1    0.835598    0.543110    1.136537    11.00000    0.05149    0.04675 =
         0.04380    0.00422    0.01441    0.00308
AFIX  23
H01Y  2    0.853060    0.502968    1.152848    11.00000   -1.20000
HB    2    0.769851    0.562451    1.159914    11.00000   -1.20000
AFIX   0
C01F  1    1.062624    0.414961    0.857081    11.00000    0.05380    0.05087 =
         0.04741    0.00294    0.01164    0.00848
AFIX  23
H01Z  2    1.052315    0.399367    0.813291    11.00000   -1.20000
HC    2    1.075442    0.378625    0.880577    11.00000   -1.20000
AFIX   0
C01I  1    0.705866    0.497194    1.061591    11.00000    0.03626    0.04719 =
         0.05073    0.00950    0.00767    0.00134
AFIX  23
H01   2    0.640191    0.518759    1.083075    11.00000   -1.20000
HD    2    0.714637    0.455984    1.077385    11.00000   -1.20000
AFIX   0
C01M  1    0.955238    0.292975    1.063589    11.00000    0.06183    0.05210 =
         0.04752    0.01070   -0.00955   -0.00525
AFIX  23
H0AA  2    0.940792    0.282059    1.105894    11.00000   -1.20000
HE    2    0.906433    0.266273    1.034602    11.00000   -1.20000
AFIX   0
C02C  1    0.683939    0.488998    0.993399    11.00000    0.03506    0.05417 =
         0.05296    0.01698    0.00387    0.00608
AFIX  23
H02   2    0.611357    0.465527    0.984740    11.00000   -1.20000
HF    2    0.676785    0.530221    0.977437    11.00000   -1.20000
AFIX   0
C02F  1    0.862783    0.406967    0.873879    11.00000    0.05054    0.06154 =
         0.04716    0.00016   -0.00052   -0.01319
AFIX  23
H1AA  2    0.874926    0.369997    0.896566    11.00000   -1.20000
HG    2    0.847902    0.392486    0.830201    11.00000   -1.20000
AFIX   0
C02Z  1    0.932525    0.361269    1.058604    11.00000    0.05889    0.06583 =
         0.08151    0.03648    0.01881    0.01254
AFIX  23
H2AA  2    0.859139    0.366638    1.036898    11.00000   -1.20000
HH    2    0.928322    0.384461    1.099944    11.00000   -1.20000
AFIX   0
C03A  1    1.077561    0.286176    1.047331    11.00000    0.04626    0.05625 =
         0.24492    0.04647    0.02527    0.01315
AFIX  23
H03I  2    1.121748    0.273973    1.082877    11.00000   -1.20000
H03J  2    1.087123    0.253440    1.012663    11.00000   -1.20000
AFIX   0
C03C  1    1.118626    0.344810    1.030223    11.00000    0.04488    0.08533 =
         0.11138    0.04602   -0.00029    0.01265
AFIX  23
H03K  2    1.172164    0.363994    1.061910    11.00000   -1.20000
H03L  2    1.160509    0.338577    0.990640    11.00000   -1.20000
AFIX   0
C020  1    0.763346    0.443496    0.900303    11.00000    0.04295    0.06628 =
         0.04067    0.00777   -0.00865   -0.00632
AFIX  23
H3AA  2    0.758028    0.483232    0.881320    11.00000   -1.20000
HI    2    0.691206    0.419684    0.891410    11.00000   -1.20000
AFIX   0
HKLF 4

REM  pimx005_a.res in P-1
REM R1 =  0.0563 for   20467 Fo > 4sig(Fo)  and  0.0675 for all   23726 data
REM   1112 parameters refined using      0 restraints

END

WGHT      0.0409     12.4706

REM Highest difference peak  1.019,  deepest hole -0.541,  1-sigma level  0.140
Q1    1   0.4013  0.2465  0.7527  11.00000  0.05    1.02
;
_shelx_res_checksum              7331
_shelx_hkl_file                  
;
 -13  -3  13    0.49    0.89   0
 -12 -10  10    0.42    0.85   0
 -12  -9  10    4.76    0.95   0
 -12  -8  10   15.68    0.93   0
 -12  -7  10    8.51    0.91   0
 -12  -6  10    1.22    0.82   0
 -12  -5  10    0.66    0.78   0
 -12  -2  11    5.38    0.79   0
 -12  -1  11    4.05    0.69   0
 -12   1  12    9.60    0.67   0
 -12   4  14    2.77    0.64   0
 -11 -16  10    2.56    1.23   0
 -11 -14   9    7.38    0.95   0
 -11 -13   9    2.90    1.02   0
 -11 -10   8    0.10    0.73   0
 -11  -9   8    0.31    0.72   0
 -11  -8   8   18.82    0.82   0
 -11  -7   8    2.56    0.77   0
 -11  -6   8    4.56    0.76   0
 -11  -5   8    5.27    0.70   0
 -11   6  13    3.60    0.53   0
 -11   7  14    0.29    0.49   0
 -10 -18   9   -0.20    0.99   0
 -10 -16   8   -0.92    0.92   0
 -10 -13   7    2.34    0.79   0
 -10 -12   7    0.83    0.91   0
 -10  -2   7    2.78    0.53   0
 -10  -1   7    0.80    0.51   0
 -10   5  10    4.65    0.43   0
 -10  10  15    0.27    0.38   0
  -9 -19   8   -0.74    1.07   0
  -9 -17   7    1.59    0.84   0
  -9 -10   5   11.37    0.61   0
  -9  -9   5    6.55    0.70   0
  -9  -8   5    4.44    0.69   0
  -9  -7   5    8.86    0.65   0
  -9  -6   5   21.54    0.66   0
  -9  -5   5    1.52    0.58   0
  -9  -4   5    0.79    0.56   0
  -9   0   6   54.12    0.57   0
  -9   3   7   17.62    0.39   0
  -9  11  14    0.71    0.31   0
  -8 -21   8    0.63    1.19   0
  -8 -20   7    8.47    0.94   0
  -8 -18   6    7.30    0.80   0
  -8 -15   5   10.68    0.73   0
  -8 -11   4    3.94    0.69   0
  -8 -10   4    0.95    0.65   0
  -8  -3   4   13.97    0.49   0
  -8  -2   4   10.01    0.44   0
  -8   1   5    7.76    0.42   0
  -8   7   8    2.92    0.28   0
  -7 -23   8   -0.76    1.19   0
  -7 -20   6    9.53    0.86   0
  -7 -18   5    0.89    0.74   0
  -7 -15   4    2.25    0.80   0
  -7 -12   3   30.02    0.64   0
  -7 -11   3   49.51    0.72   0
  -7  -2   3   31.94    0.44   0
  -6 -23   7    1.62    1.13   0
  -6 -20   5   10.40    0.80   0
  -6 -15   3   14.40    0.61   0
  -6 -11   2    1.12    0.48   0
  -6 -10   2   14.10    0.58   0
  -6  -3   2   22.20    0.42   0
  -6  15  13   12.35    0.32   0
  -5 -24   7    3.75    1.06   0
  -5 -23   6    1.31    0.83   0
  -5 -21   5    2.32    0.93   0
  -5 -19   4    1.72    0.80   0
  -5 -17   3    1.16    0.61   0
  -5 -14   2    3.08    0.52   0
  -5  -8   1   87.65    0.53   0
  -5  -7   1   25.35    0.41   0
  -5  -6   1   32.01    0.41   0
  -5  -5   1   50.99    0.42   0
  -5  17  15    8.62    0.50   0
  -4 -25   7   -0.66    1.06   0
  -4 -24   6    1.06    0.82   0
  -4 -22   5    4.74    0.87   0
  -4 -18   3    6.29    0.70   0
  -4 -16   2   14.73    0.55   0
  -4 -12   1    4.14    0.53   0
  -4  -1   1    1.99    0.25   0
  -4  17  14    0.69    0.50   0
  -4  18  16    6.66    0.63   0
  -3 -26   7    0.90    1.02   0
  -3 -23   5    8.37    0.92   0
  -3 -17   2    2.17    0.62   0
  -3 -14   1   13.41    0.55   0
  -3  -8   0  213.69    0.60   0
  -3  -7   0   52.28    0.45   0
  -3  -6   0    2.33    0.37   0
  -3  -5   0   97.16    0.45   0
  -3  -4   0  284.51    0.54   0
  -3   4   2  481.16    0.26   0
  -3  15  10    8.95    0.42   0
  -3  17  13    4.10    0.56   0
  -3  18  15    0.40    0.64   0
  -2 -25   6   -1.15    0.93   0
  -2 -22   4    6.82    0.76   0
  -2 -20   3   10.21    0.69   0
  -2 -18   2   43.42    0.70   0
  -2 -15   1   18.35    0.53   0
  -2 -11   0  135.20    0.59   0
  -2  16  11    3.65    0.49   0
  -1 -24   5    4.53    0.80   0
  -1 -16   1   19.47    0.53   0
  -1 -12   0    4.70    0.40   0
  -1  13   7   36.29    0.45   0
  -1  14   8   89.50    0.55   0
  -1  17  12    9.36    0.61   0
  -1  18  14    1.65    0.61   0
  -1  19  16    1.65    0.81   0
   0 -24   5    6.94    0.81   0
   0  12   6    3.55    0.36   0
   0  13   7   37.19    0.46   0
   0  14   8   39.98    0.49   0
   0  15   9   22.28    0.56   0
   0  17  12    5.03    0.59   0
   0  19  16    0.94    0.77   0
   1 -16   1   23.25    0.47   0
   1  12   6  184.69    0.65   0
   1  13   7   46.46    0.52   0
   1  14   8  139.00    0.70   0
   1  17  12    5.98    0.64   0
   1  18  14    2.93    0.72   0
   1  19  16    0.71    0.83   0
   2 -22   4    3.96    0.58   0
   2   3   1  570.24    0.63   0
   2   9   4   78.34    0.50   0
   2  18  14    1.13    0.76   0
   3 -26   7    2.21    0.80   0
   3   2   1  179.66    0.41   0
   3  10   5   25.67    0.49   0
   4  -6   0  433.66    0.29   0
   4  17  14    0.21    0.74   0
   5   2   2    9.18    0.32   0
   5  17  15    5.63    1.00   0
   6   0   2  124.72    0.52   0
   6   3   3   50.99    0.44   0
   6   7   5   12.97    0.46   0
   6  11   8    8.26    0.59   0
   6  12   9   13.49    0.62   0
   6  13  10   11.02    0.77   0
   6  15  13    6.96    0.81   0
   6  16  14   16.59    1.00   0
   6  17  16    0.67    1.08   0
   7  -5   2   14.42    0.32   0
   7  -4   2   30.16    0.37   0
   7   1   3  123.63    0.61   0
   7  10   8    2.38    0.73   0
   7  11   9    1.60    0.77   0
   7  12  10    4.24    0.80   0
   7  13  11   12.30    0.83   0
   7  14  13   12.05    0.84   0
   7  15  14    2.84    1.07   0
   7  16  16    6.88    1.21   0
   8  -4   3   22.99    0.45   0
   8   1   4   40.62    0.56   0
   8  13  13    1.54    0.82   0
   8  14  14    6.62    1.07   0
   8  15  16    1.96    1.23   0
   9 -10   4   40.38    0.45   0
   9  -5   4    2.46    0.48   0
   9  -4   4   18.42    0.53   0
   9   0   5   10.93    0.59   0
   9   3   6    8.78    0.64   0
   9   5   7   12.54    0.72   0
   9   8   9    0.65    0.79   0
   9   9  10    0.95    0.82   0
   9  10  11   20.52    0.93   0
   9  11  12    0.56    0.98   0
   9  13  15    5.08    1.14   0
  10 -14   6   20.79    0.42   0
  10  -1   6    2.55    0.59   0
  10   2   7    8.54    0.72   0
  10   4   8   34.75    0.83   0
  10   7  10    4.41    0.90   0
  10   8  11    7.60    0.80   0
  10   9  12    1.96    0.83   0
  10  10  13    4.65    1.02   0
  10  11  14    2.23    1.08   0
  11 -12   7   15.07    0.57   0
  11  -4   7   41.28    0.73   0
  11  -3   7   25.36    0.71   0
  11   0   8    6.93    0.73   0
  11   3   9    9.55    0.81   0
  11   4  10   31.76    0.81   0
  11   6  11    3.48    0.95   0
  11   7  12    1.67    1.04   0
  11   8  13    7.76    1.16   0
  11   9  14    2.85    1.21   0
  12 -13   9   -0.37    0.65   0
  12  -3   9   11.40    0.82   0
  12  -2   9   21.93    0.84   0
  12   0  10   10.84    0.88   0
  12   1  10    4.90    0.86   0
  12   2  11    1.46    0.80   0
  12   4  12    4.28    1.06   0
  12   5  13    1.50    0.93   0
  12   6  14    3.27    0.97   0
  13  -4  11    5.61    0.94   0
  13  -3  11    2.70    0.94   0
  13  -1  12   -0.26    0.84   0
  13   0  12   12.52    1.08   0
  13   2  13    2.03    1.11   0
 -12 -12  11   -0.51    0.94   0
 -12 -11  11    1.34    1.13   0
 -12 -10  11    0.61    1.05   0
 -12  -4  11    6.43    0.80   0
 -12  -3  11    1.32    0.74   0
 -12   0  12    0.54    0.67   0
 -12   2  13    1.13    0.69   0
 -11 -15  10   -0.79    1.14   0
 -11 -14  10    0.69    1.06   0
 -11 -12   9    1.76    0.96   0
 -11 -11   9    3.94    0.97   0
 -11  -3   9   33.43    0.72   0
 -11  -2   9    3.35    0.64   0
 -11   1  10    5.24    0.54   0
 -11   3  11    4.44    0.49   0
 -11   4  12   -0.03    0.60   0
 -10 -17   9   -0.18    0.95   0
 -10 -15   8    0.46    0.85   0
 -10 -11   7   12.82    0.74   0
 -10 -10   7    0.43    0.79   0
 -10  -9   7   11.18    0.78   0
 -10  -4   7    3.80    0.62   0
 -10  -3   7   18.02    0.61   0
 -10   1   8    1.24    0.47   0
 -10   3   9    1.20    0.47   0
 -10   6  11   14.15    0.46   0
 -10   7  12    4.28    0.44   0
 -10   9  14    4.80    0.40   0
  -9 -20   9    0.58    0.99   0
  -9 -18   8    7.24    1.05   0
  -9 -16   7    0.13    0.76   0
  -9 -13   6    3.97    0.69   0
  -9 -12   6   49.47    0.91   0
  -9  -1   6   22.08    0.58   0
  -9   2   7   14.40    0.45   0
  -9   6   9    6.47    0.36   0
  -8 -22   9    2.99    1.23   0
  -8 -20   8   14.82    1.10   0
  -8 -19   7    0.94    0.83   0
  -8 -17   6    1.02    0.77   0
  -8 -14   5    6.84    0.67   0
  -8 -13   5    0.21    0.76   0
  -8  -9   4    5.14    0.55   0
  -8  -8   4   44.51    0.69   0
  -8  -7   4   37.30    0.64   0
  -8  -6   4   19.78    0.58   0
  -8  -5   4    7.99    0.54   0
  -8  -4   4    2.62    0.48   0
  -8   3   6   62.61    0.47   0
  -8   8   9    5.67    0.29   0
  -7 -22   8    7.19    1.13   0
  -7 -21   7    0.20    0.84   0
  -7 -19   6    2.90    0.90   0
  -7 -17   5   12.93    0.74   0
  -7 -14   4   39.80    0.80   0
  -7 -10   3   10.49    0.51   0
  -7  -9   3    1.89    0.56   0
  -7  -8   3   18.75    0.58   0
  -7  -7   3   12.57    0.53   0
  -7  -6   3   17.86    0.51   0
  -7  -5   3   11.94    0.48   0
  -7  -4   3   23.28    0.48   0
  -7  -3   3   15.75    0.37   0
  -7   1   4   24.67    0.39   0
  -6 -24   8    0.22    0.95   0
  -6 -22   7    5.96    1.01   0
  -6 -21   6    0.65    0.81   0
  -6 -19   5    5.92    0.87   0
  -6 -17   4   24.23    0.74   0
  -6 -14   3   18.18    0.62   0
  -6  -9   2    1.49    0.44   0
  -6  -8   2  129.02    0.63   0
  -6  -7   2   12.41    0.49   0
  -6  -6   2   13.82    0.47   0
  -6  -5   2    3.94    0.44   0
  -6  -4   2  373.54    0.78   0
  -5 -25   8   -0.04    1.17   0
  -5 -22   6    0.75    0.95   0
  -5 -16   3   11.72    0.72   0
  -5 -13   2   13.15    0.53   0
  -5  16  13   10.90    0.41   0
  -4 -26   8    7.56    1.16   0
  -4 -23   6   -0.37    0.93   0
  -4 -20   4   30.09    0.73   0
  -4 -15   2   21.43    0.62   0
  -4 -11   1   31.28    0.46   0
  -4   5   3   90.25    0.18   0
  -4  16  12    3.59    0.41   0
  -3 -24   6    3.74    0.94   0
  -3 -21   4    0.95    0.73   0
  -3 -19   3    0.11    0.66   0
  -3 -16   2   74.65    0.71   0
  -3 -13   1   81.51    0.62   0
  -3   1   1    3.76    0.16   0
  -3  19  17    2.10    0.70   0
  -2 -26   7    2.58    0.99   0
  -2 -23   5    1.62    0.80   0
  -2 -17   2    1.43    0.57   0
  -2 -14   1   54.73    0.55   0
  -2 -10   0   76.45    0.44   0
  -2  -9   0   10.41    0.40   0
  -2  -2   0  291.19    0.42   0
  -2   9   4  104.89    0.30   0
  -2  17  12    0.49    0.54   0
  -2  18  14    3.72    0.61   0
  -2  19  16    1.60    0.72   0
  -1 -26   7    1.07    1.00   0
  -1 -25   6    3.11    0.85   0
  -1 -22   4    3.52    0.71   0
  -1 -20   3    3.06    0.60   0
  -1 -18   2   29.95    0.60   0
  -1 -15   1    9.19    0.46   0
  -1 -11   0   59.70    0.45   0
  -1  12   6  143.34    0.49   0
  -1  15   9   26.44    0.50   0
   0 -25   6    0.10    0.87   0
   0 -22   4    0.53    0.69   0
   0   6   2 1143.71    0.79   0
   0   8   3    2.78    0.24   0
   0  11   5   22.34    0.35   0
   0  16  10   -0.07    0.57   0
   0  18  13    0.61    0.72   0
   0  19  15   -0.20    0.80   0
   1   6   2  109.36    0.38   0
   1   8   3   10.05    0.33   0
   1  11   5    7.93    0.38   0
   1  15   9   44.15    0.60   0
   1  16  10   58.06    0.66   0
   2 -26   7    0.88    0.80   0
   2 -25   6    1.04    0.73   0
   2 -15   1   14.28    0.36   0
   2 -11   0  173.35    0.41   0
   2  12   6   14.15    0.46   0
   2  13   7    6.39    0.50   0
   2  14   8   12.24    0.57   0
   2  15   9    1.99    0.57   0
   3 -14   1   20.28    0.32   0
   3  -9   0   12.32    0.15   0
   3  -2   0  105.55    0.24   0
   3   5   2   23.14    0.33   0
   3   7   3   15.08    0.35   0
   3   9   4   38.66    0.49   0
   3  16  11   15.14    0.60   0
   3  18  14   11.05    0.89   0
   4  -5   0  168.85    0.25   0
   4   1   1   26.10    0.27   0
   4   4   2   12.61    0.33   0
   4   8   4   48.87    0.46   0
   4  12   7    2.87    0.47   0
   4  13   8    6.00    0.49   0
   4  14   9   10.90    0.57   0
   4  15  10    5.71    0.73   0
   5  -1   1   10.98    0.28   0
   5   3   2   24.21    0.43   0
   5   5   3   12.77    0.38   0
   5   7   4   26.69    0.43   0
   5  10   6   99.96    0.64   0
   5  18  16    2.29    1.14   0
   6   1   2   10.69    0.38   0
   6   6   4   25.06    0.53   0
   6   9   6    2.70    0.50   0
   6  15  12    2.83    0.87   0
   6  17  15    3.09    1.03   0
   7 -10   2   26.18    0.24   0
   7  -3   2   13.79    0.39   0
   7   4   4   32.40    0.47   0
   7   6   5   63.06    0.58   0
   7   9   7   25.75    0.62   0
   7  14  12    6.96    0.78   0
   7  15  13   24.97    1.03   0
   7  16  15   10.56    1.17   0
   8 -11   3   16.54    0.29   0
   8  -3   3   11.56    0.42   0
   8  -2   3   80.23    0.59   0
   8   2   4   18.99    0.52   0
   8   4   5    8.00    0.59   0
   8   6   6    2.17    0.62   0
   8   9   8    5.70    0.75   0
   8  10   9    1.93    0.65   0
   8  11  10    5.19    0.72   0
   8  12  11    3.17    0.76   0
   8  13  12    5.63    0.95   0
   8  15  15    0.71    1.19   0
   9 -15   5    4.42    0.24   0
   9 -11   4    1.76    0.36   0
   9  -3   4    6.40    0.46   0
   9   1   5    5.01    0.59   0
   9   4   6   40.39    0.73   0
   9   7   8    3.21    0.62   0
   9  12  13   25.94    0.91   0
   9  13  14    1.70    1.06   0
  10  -9   5   19.58    0.49   0
  10  -8   5    2.65    0.47   0
  10  -7   5    2.46    0.49   0
  10  -6   5   17.93    0.57   0
  10  -5   5    1.18    0.57   0
  10  -4   5    3.48    0.61   0
  10   0   6   15.61    0.65   0
  10   3   7   30.43    0.78   0
  10   5   8    9.02    0.81   0
  10   6   9    7.62    0.69   0
  10   8  10    2.26    0.87   0
  10   9  11   13.22    0.98   0
  10  10  12    1.34    1.01   0
  10  11  13   12.47    1.07   0
  10  12  15    1.09    1.00   0
  11 -16   8    3.38    0.46   0
  11 -13   7    7.43    0.50   0
  11  -2   7   15.16    0.73   0
  11  -1   7   26.70    0.74   0
  11   1   8   12.50    0.75   0
  11   5  10   12.33    0.92   0
  11   8  12    0.27    1.01   0
  11   9  13    4.85    1.12   0
  12 -14   9    6.85    0.64   0
  12  -9   8    1.59    0.66   0
  12  -8   8    1.98    0.72   0
  12  -7   8    0.12    0.76   0
  12  -6   8   15.18    0.80   0
  12  -5   8    0.33    0.78   0
  12  -1   9   12.30    0.83   0
  12   2  10    1.98    0.94   0
  12   3  11   12.17    0.84   0
  12   5  12    1.17    1.06   0
  12   6  13   14.54    1.13   0
  12   7  14    2.84    1.02   0
  13  -9  10   -0.11    0.87   0
  13  -8  10    1.84    0.87   0
  13  -7  10    1.88    0.90   0
  13  -6  10   23.36    0.98   0
  13  -5  10    1.12    0.91   0
  13  -2  11   14.67    0.96   0
  13  -1  11    1.03    0.96   0
  13   1  12    8.81    1.10   0
 -12  -9  11    0.87    0.83   0
 -12  -8  11    0.52    0.92   0
 -12  -7  11    4.22    0.92   0
 -12  -6  11    1.15    0.87   0
 -12  -5  11    0.03    0.79   0
 -12  -2  12    1.44    0.83   0
 -12  -1  12    2.89    0.72   0
 -12   1  13    0.14    0.72   0
 -12   4  15    1.91    0.69   0
 -11 -15  11    1.18    1.17   0
 -11 -13  10    1.77    1.09   0
 -11 -10   9    2.95    0.76   0
 -11  -9   9    1.54    0.81   0
 -11  -8   9    1.45    0.81   0
 -11  -7   9    0.26    0.77   0
 -11  -6   9   12.00    0.78   0
 -11  -5   9    4.47    0.76   0
 -11  -4   9   16.70    0.74   0
 -11   0  10    1.82    0.56   0
 -11   2  11    0.55    0.60   0
 -11   5  13   10.15    0.59   0
 -10 -18  10    2.60    1.01   0
 -10 -17  10   -0.42    1.12   0
 -10 -16   9    1.13    0.91   0
 -10 -15   9    0.82    1.04   0
 -10 -13   8    1.56    0.78   0
 -10 -12   8   14.67    0.95   0
 -10  -8   7    2.63    0.62   0
 -10  -7   7    0.34    0.66   0
 -10  -6   7    3.26    0.65   0
 -10  -5   7   14.52    0.57   0
 -10   0   8   10.53    0.53   0
 -10   2   9   -0.18    0.52   0
 -10   4  10    1.55    0.50   0
 -10   8  13    7.92    0.42   0
  -9 -20  10   11.58    1.27   0
  -9 -19   9    1.63    0.94   0
  -9 -17   8   -0.62    0.95   0
  -9 -15   7    9.14    0.77   0
  -9 -11   6    8.40    0.75   0
  -9 -10   6    4.20    0.72   0
  -9  -2   6   15.44    0.52   0
  -9   4   8    0.68    0.38   0
  -9   7  10    6.10    0.37   0
  -9  10  13   10.14    0.35   0
  -8 -21   9    0.28    1.20   0
  -8 -18   7    1.65    0.81   0
  -8 -15   6    0.97    0.83   0
  -8 -12   5   14.77    0.76   0
  -8   0   5    3.90    0.39   0
  -8   5   7   15.85    0.35   0
  -8   9  10    3.45    0.27   0
  -8  11  12    1.42    0.23   0
  -7 -23   9    3.29    1.18   0
  -7 -20   7    1.96    0.97   0
  -7 -18   6    9.79    0.94   0
  -7 -16   5    1.30    0.68   0
  -7 -13   4    3.15    0.59   0
  -7 -12   4    1.96    0.66   0
  -6 -24   9   14.23    1.19   0
  -6 -23   8    0.85    1.15   0
  -6 -20   6    3.81    0.95   0
  -6 -18   5   -0.82    0.80   0
  -6 -16   4   17.31    0.68   0
  -6 -13   3   43.73    0.63   0
  -6 -12   3    6.91    0.61   0
  -5 -24   8    2.32    1.07   0
  -5 -23   7    0.39    1.00   0
  -5 -20   5    3.15    0.69   0
  -5 -18   4   21.44    0.70   0
  -5 -15   3    3.09    0.68   0
  -5 -12   2   93.29    0.64   0
  -5 -11   2    8.39    0.55   0
  -5   0   2    1.37    0.27   0
  -5  13   9   14.41    0.23   0
  -4 -25   8   -0.96    1.03   0
  -4 -24   7    2.52    1.00   0
  -4 -21   5   -1.33    0.83   0
  -4 -19   4    4.73    0.77   0
  -4 -17   3    0.57    0.65   0
  -4 -14   2    6.50    0.58   0
  -4 -10   1   16.21    0.41   0
  -4  -9   1   98.16    0.58   0
  -4  -2   1   30.95    0.32   0
  -4  18  15    1.70    0.57   0
  -3 -26   8    7.10    1.09   0
  -3 -25   7   -0.10    0.96   0
  -3 -22   5   11.14    0.84   0
  -3 -20   4   39.93    0.85   0
  -3 -18   3    7.52    0.68   0
  -3 -12   1   11.87    0.48   0
  -3  10   5   35.48    0.22   0
  -3  16  11    9.12    0.42   0
  -3  18  14    8.35    0.60   0
  -3  19  16    1.90    0.69   0
  -2 -24   6    1.16    0.87   0
  -2 -21   4   -0.42    0.69   0
  -2 -19   3    2.11    0.63   0
  -2  -8   0  133.51    0.51   0
  -2  -3   0  337.23    0.51   0
  -2  12   6    8.77    0.31   0
  -2  13   7    7.56    0.32   0
  -2  14   8    6.80    0.38   0
  -2  15   9    1.68    0.40   0
  -1 -23   5    1.23    0.73   0
  -1 -17   2    6.79    0.59   0
  -1 -10   0   11.97    0.36   0
  -1   6   2  115.50    0.26   0
  -1   8   3   14.07    0.24   0
  -1  11   5    4.85    0.31   0
  -1  16  10   46.01    0.55   0
  -1  18  13    1.34    0.56   0
  -1  19  15    0.41    0.66   0
   0 -26   7    0.98    0.84   0
   0 -23   5    2.41    0.76   0
   0 -20   3    1.67    0.52   0
   0  20  17    0.26    0.84   0
   1 -15   1   12.59    0.38   0
   1 -11   0   81.00    0.38   0
   1  10   4  181.85    0.56   0
   1  17  11    0.86    0.61   0
   2   6   2  207.19    0.52   0
   2   8   3   29.17    0.41   0
   2  11   5   20.10    0.45   0
   2  16  10    3.01    0.61   0
   2  18  13    9.27    0.77   0
   3  12   6   75.43    0.63   0
   3  15   9    3.88    0.65   0
   4  10   5   49.39    0.49   0
   4  16  11   21.06    0.68   0
   5  18  15    1.21    1.07   0
   6  -8   1    2.70    0.19   0
   6  -7   1   55.56    0.25   0
   6  -6   1   29.66    0.25   0
   6  -5   1   25.13    0.28   0
   6   8   5   61.60    0.58   0
   6  12   8    8.98    0.60   0
   6  13   9    0.16    0.61   0
   6  16  13    4.52    0.82   0
   6  17  14   -0.34    0.97   0
   6  18  16    5.84    1.17   0
   7  -2   2  129.52    0.52   0
   7   2   3   29.92    0.49   0
   7   5   4   22.94    0.56   0
   7   7   5   23.67    0.61   0
   7  10   7   17.23    0.70   0
   7  11   8   15.89    0.77   0
   7  12   9    1.25    0.77   0
   7  13  10    7.78    0.82   0
   7  14  11    0.94    0.88   0
   7  16  14    4.21    1.10   0
   8  -1   3   32.95    0.49   0
   8   5   5   12.95    0.61   0
   8   7   6   11.19    0.67   0
   8   8   7   12.53    0.59   0
   8  11   9    3.04    0.79   0
   8  12  10    2.71    0.84   0
   8  14  13    7.73    0.90   0
   8  15  14   -0.71    1.15   0
   9  -2   4   29.13    0.54   0
   9  -1   4   37.41    0.63   0
   9   2   5    5.20    0.61   0
   9   6   7    5.62    0.60   0
   9   8   8    6.30    0.79   0
   9   9   9    4.76    0.68   0
   9  10  10    1.12    0.73   0
   9  11  11   19.86    0.83   0
   9  12  12    0.94    0.82   0
   9  13  13    7.84    1.08   0
   9  14  15    2.61    1.01   0
  10 -10   5    6.65    0.44   0
  10  -3   5    3.19    0.56   0
  10  -2   5    4.10    0.62   0
  10   1   6   17.93    0.68   0
  10   4   7   18.57    0.76   0
  10   7   9    3.72    0.84   0
  10  12  14    0.71    0.98   0
  11  -7   6    7.37    0.61   0
  11  -6   6   58.17    0.73   0
  11   0   7    8.80    0.72   0
  11   2   8   12.24    0.67   0
  11   4   9    3.54    0.71   0
  11   6  10    1.15    0.96   0
  11   7  11    6.43    0.85   0
  11  10  14    2.88    1.04   0
  12 -11   8   -0.59    0.65   0
  12 -10   8   13.57    0.67   0
  12  -4   8   10.54    0.74   0
  12  -3   8    1.66    0.75   0
  12   0   9    1.20    0.80   0
  12   1   9   24.49    0.90   0
  12   3  10    1.29    0.96   0
  12   4  11    1.21    0.83   0
  12   6  12    4.60    1.12   0
  12   7  13    4.41    1.13   0
  13  -4  10    1.12    0.88   0
  13  -3  10    2.00    0.91   0
  13   0  11   10.83    1.03   0
  13   2  12    4.58    1.07   0
 -12 -11  12    0.06    0.94   0
 -12 -10  12   -0.16    1.06   0
 -12  -9  12    2.53    0.99   0
 -12  -8  12    1.48    0.95   0
 -12  -5  12    1.99    0.82   0
 -12  -4  12    1.17    0.80   0
 -12  -3  12    0.51    0.77   0
 -12   0  13    2.95    0.78   0
 -12   2  14   -1.05    0.73   0
 -12   3  15    1.35    0.76   0
 -11 -14  11    1.72    1.11   0
 -11 -12  10    0.43    0.83   0
 -11 -11  10    2.08    0.95   0
 -11 -10  10    6.96    0.88   0
 -11  -2  10    2.20    0.71   0
 -11  -1  10    4.47    0.59   0
 -11   1  11    8.71    0.64   0
 -11   3  12    1.73    0.56   0
 -11   6  14    0.73    0.55   0
 -11   7  15    8.95    0.57   0
 -10 -16  10   -0.88    1.05   0
 -10 -14   9    0.34    1.01   0
 -10 -11   8    2.48    0.81   0
 -10 -10   8    1.70    0.79   0
 -10  -2   8    4.72    0.56   0
 -10  -1   8   14.52    0.56   0
  -9 -18   9    1.29    0.87   0
  -9 -16   8    0.78    0.78   0
  -9 -13   7    0.61    0.78   0
  -9  -9   6   -0.01    0.57   0
  -9  -8   6   61.11    0.81   0
  -9  -7   6    4.24    0.66   0
  -9  -6   6    0.21    0.62   0
  -9  -5   6   22.82    0.63   0
  -9  -4   6  103.24    0.74   0
  -9  -3   6   12.14    0.57   0
  -9   1   7   10.26    0.48   0
  -9   8  11    9.27    0.37   0
  -9   9  12    0.30    0.34   0
  -8 -20   9    0.50    1.05   0
  -8 -19   8    2.03    0.84   0
  -8 -17   7    1.48    0.79   0
  -8 -14   6   18.15    0.85   0
  -8 -11   5    1.02    0.57   0
  -8 -10   5   12.61    0.70   0
  -8  -1   5    2.83    0.41   0
  -8   2   6   38.42    0.44   0
  -8  10  11   23.21    0.29   0
  -7 -22   9   -1.33    1.17   0
  -7 -21   8    0.75    0.88   0
  -7 -19   7    1.51    0.92   0
  -7 -17   6   -0.71    0.85   0
  -7 -15   5   35.58    0.74   0
  -7 -11   4    2.63    0.64   0
  -7   0   4   21.98    0.37   0
  -6 -21   7   -0.58    0.80   0
  -6 -19   6    1.66    0.88   0
  -6 -17   5   22.59    0.84   0
  -6 -15   4   10.80    0.60   0
  -6 -11   3    6.63    0.59   0
  -6   0   3    7.48    0.32   0
  -5 -25   9    0.49    1.13   0
  -5 -21   6    0.69    0.73   0
  -5 -19   5    0.72    0.77   0
  -5 -17   4    1.48    0.58   0
  -5 -14   3   61.55    0.73   0
  -5 -10   2  159.17    0.74   0
  -5  -1   2   26.21    0.35   0
  -5  14  10   31.06    0.29   0
  -4 -22   6    3.16    0.86   0
  -4 -16   3    3.87    0.63   0
  -4 -13   2    7.01    0.56   0
  -4  -8   1   25.87    0.40   0
  -4  -7   1   70.03    0.52   0
  -4  -6   1   20.74    0.43   0
  -4  -5   1    1.53    0.38   0
  -4  -4   1   21.12    0.38   0
  -4  -3   1    6.05    0.27   0
  -4   2   2  369.63    0.45   0
  -4  13   8   11.16    0.27   0
  -4  14   9   13.93    0.33   0
  -4  17  13   16.45    0.47   0
  -3 -24   7    3.93    0.91   0
  -3 -23   6    2.06    0.87   0
  -3 -15   2    6.00    0.47   0
  -3 -11   1    3.19    0.45   0
  -3  17  12    1.95    0.48   0
  -2 -26   8   10.15    1.02   0
  -2 -25   7    3.26    0.90   0
  -2 -22   5   14.72    0.79   0
  -2 -16   2    4.67    0.53   0
  -2 -13   1    3.25    0.44   0
  -2  -7   0   62.95    0.36   0
  -2  -6   0   23.77    0.33   0
  -2  -5   0  157.61    0.45   0
  -2  -4   0  209.23    0.44   0
  -2  16  10    1.31    0.44   0
  -2  18  13   13.73    0.59   0
  -1 -24   6   16.31    0.82   0
  -1 -21   4    3.77    0.66   0
  -1 -19   3   13.47    0.59   0
  -1  17  11    0.65    0.50   0
  -1  19  14    1.54    0.70   0
   0 -21   4    2.07    0.63   0
   0  10   4    4.11    0.30   0
   0  19  14    1.19    0.67   0
   0  20  16   11.40    0.84   0
   1   4   1  159.64    0.36   0
   1  14   7   15.17    0.49   0
   1  15   8    2.33    0.48   0
   1  18  12    3.09    0.64   0
   1  19  14    1.23    0.73   0
   1  20  16    0.49    0.85   0
   2 -10   0   47.47    0.26   0
   2   0   0  730.58    0.50   0
   2  10   4   11.18    0.41   0
   2  19  14   -0.61    0.82   0
   3  -1   0   13.39    0.21   0
   3   3   1    0.25    0.25   0
   3   6   2  299.24    0.67   0
   3   8   3  104.72    0.55   0
   3  11   5   21.44    0.42   0
   3  17  11    6.55    0.72   0
   4  -4   0   21.81    0.17   0
   4   2   1   89.16    0.40   0
   4   5   2   24.83    0.37   0
   5   0   1   33.92    0.34   0
   5   4   2   25.48    0.45   0
   5   8   4   16.17    0.42   0
   5  11   6    0.76    0.47   0
   5  15  10    4.69    0.64   0
   6  -4   1   95.85    0.37   0
   6  -3   1   20.13    0.31   0
   6   2   2   31.84    0.45   0
   6   7   4   19.43    0.54   0
   6  10   6   19.52    0.53   0
   6  16  12    0.82    0.97   0
   7 -11   2    1.34    0.17   0
   7  -1   2   30.69    0.42   0
   7   3   3   43.78    0.53   0
   7   9   6   37.20    0.72   0
   7  15  12    9.56    0.83   0
   7  16  13    4.45    1.02   0
   7  17  15    4.08    1.18   0
   8   0   3   23.16    0.50   0
   8   3   4   17.54    0.56   0
   8   9   7   -0.34    0.71   0
   8  10   8    2.28    0.63   0
   8  13  11    6.03    0.77   0
   8  14  12    8.75    0.97   0
   8  15  13   11.23    1.08   0
   8  16  15    1.28    1.24   0
   9 -12   4    5.46    0.32   0
   9   0   4    3.54    0.54   0
   9   3   5    2.28    0.62   0
   9   5   6   22.40    0.60   0
   9   7   7   22.25    0.73   0
   9  10   9    3.34    0.86   0
   9  11  10    8.57    0.96   0
   9  12  11    3.81    0.99   0
   9  13  12    3.34    0.99   0
   9  14  14    1.55    0.98   0
  10 -15   6    0.03    0.34   0
  10 -11   5    9.71    0.42   0
  10  -1   5    8.18    0.59   0
  10   2   6    6.40    0.68   0
  10   5   7   26.71    0.79   0
  10   6   8    3.83    0.66   0
  10   8   9    0.42    0.87   0
  10   9  10    2.09    0.76   0
  10  10  11   10.43    0.83   0
  10  11  12    2.04    0.85   0
  10  12  13    0.83    1.08   0
  10  13  14    3.68    1.17   0
  11 -14   7   20.58    0.50   0
  11  -9   6    1.20    0.53   0
  11  -8   6   14.59    0.58   0
  11  -5   6    4.68    0.60   0
  11  -4   6   35.05    0.66   0
  11  -3   6    3.93    0.63   0
  11   1   7    1.45    0.73   0
  11   3   8    6.80    0.67   0
  11   5   9    5.42    0.74   0
  11   7  10    4.83    0.99   0
  11   8  11    2.14    1.01   0
  11   9  12    4.42    0.92   0
  11  10  13    1.76    1.00   0
  12 -12   8    5.15    0.62   0
  12  -2   8    5.41    0.80   0
  12  -1   8    1.19    0.79   0
  12   2   9    3.17    0.92   0
  12   4  10   12.83    1.01   0
  12   5  11    8.65    0.88   0
  12   7  12    0.51    1.14   0
  12   8  13   14.05    1.25   0
  13  -2  10   14.57    0.92   0
  13  -1  10    3.35    0.94   0
  13   1  11    1.31    0.98   0
  13   2  11    1.16    1.01   0
  13   3  12    5.64    0.95   0
 -12  -7  12   13.84    0.84   0
 -12  -6  12    2.66    0.86   0
 -12  -2  13    2.53    0.81   0
 -12  -1  13    1.85    0.73   0
 -12   1  14    4.74    0.77   0
 -11 -15  12    2.13    1.17   0
 -11 -13  11    0.78    0.90   0
 -11 -12  11    0.47    0.95   0
 -11  -9  10    4.18    0.83   0
 -11  -8  10    5.90    0.87   0
 -11  -7  10    0.45    0.80   0
 -11  -6  10   10.14    0.79   0
 -11  -5  10    0.46    0.71   0
 -11  -4  10    0.58    0.70   0
 -11  -3  10    0.69    0.66   0
 -11   0  11    2.00    0.64   0
 -11   4  13   -0.35    0.60   0
 -10 -17  11    1.50    1.14   0
 -10 -15  10    1.08    1.04   0
 -10 -13   9   -0.47    0.77   0
 -10 -12   9    6.23    0.90   0
 -10  -9   8    5.71    0.65   0
 -10  -8   8   13.66    0.79   0
 -10  -7   8   -0.64    0.72   0
 -10  -6   8    4.41    0.68   0
 -10  -5   8   -0.30    0.64   0
 -10  -4   8   21.93    0.68   0
 -10  -3   8    7.06    0.61   0
 -10   1   9    1.92    0.49   0
 -10   3  10    5.18    0.51   0
 -10   5  11    3.70    0.45   0
 -10  10  16    2.63    0.47   0
  -9 -19  10    0.29    0.94   0
  -9 -17   9   -0.64    0.80   0
  -9 -15   8    1.95    0.77   0
  -9 -14   8   18.19    0.90   0
  -9 -12   7    1.25    0.67   0
  -9 -11   7    1.53    0.76   0
  -9   0   7    9.51    0.46   0
  -9   3   8   15.99    0.45   0
  -9   5   9    1.15    0.37   0
  -9  12  16    1.98    0.36   0
  -8 -21  10    0.09    1.02   0
  -8 -18   8    3.75    0.83   0
  -8 -16   7    2.82    0.73   0
  -8 -13   6    7.63    0.66   0
  -8  -9   5   35.10    0.61   0
  -8  -8   5   11.81    0.61   0
  -8  -7   5    0.77    0.56   0
  -8  -6   5   10.84    0.55   0
  -8  -4   5   25.31    0.55   0
  -8  -3   5    8.91    0.49   0
  -8  -2   5   32.21    0.49   0
  -8   4   7   32.59    0.41   0
  -8   6   8    4.37    0.34   0
  -7 -23  10    0.72    1.00   0
  -7 -20   8    1.37    0.86   0
  -7 -18   7   14.33    0.95   0
  -7 -16   6    5.75    0.81   0
  -7 -14   5    6.18    0.61   0
  -7 -10   4   12.07    0.52   0
  -7  -9   4    7.83    0.58   0
  -7  -1   4   47.06    0.44   0
  -7   5   6   23.31    0.29   0
  -6 -23   9    0.59    1.07   0
  -6 -22   8   -0.36    0.89   0
  -6 -20   7    5.85    0.96   0
  -6 -16   5   14.58    0.78   0
  -6 -14   4    3.24    0.58   0
  -6 -10   3    6.76    0.46   0
  -6  -9   3   22.42    0.57   0
  -6  -1   3   39.06    0.39   0
  -6  16  14   11.82    0.33   0
  -5 -23   8    2.59    0.97   0
  -5 -22   7    0.30    0.80   0
  -5 -20   6    0.35    0.83   0
  -5 -18   5    4.63    0.78   0
  -5 -16   4   14.00    0.72   0
  -5 -13   3  100.57    0.77   0
  -5  -9   2   38.66    0.46   0
  -5  -8   2   29.77    0.50   0
  -5  -2   2  562.54    0.80   0
  -5  17  14    6.43    0.43   0
  -5  18  16    1.51    0.49   0
  -4 -24   8   -0.09    1.03   0
  -4 -23   7   -0.18    0.74   0
  -4 -20   5    0.40    0.68   0
  -4 -18   4   70.01    0.76   0
  -4 -15   3   32.77    0.64   0
  -4 -12   2   82.10    0.65   0
  -4  12   7    4.93    0.21   0
  -4  15  10    6.61    0.35   0
  -3 -26   9    2.85    1.10   0
  -3 -25   8   -1.29    0.96   0
  -3 -21   5    2.83    0.64   0
  -3 -19   4    1.85    0.67   0
  -3 -17   3    1.62    0.52   0
  -3 -14   2   10.83    0.53   0
  -3 -10   1    2.29    0.44   0
  -3   0   1   22.93    0.21   0
  -2 -23   6    1.86    0.80   0
  -2 -20   4    0.95    0.54   0
  -2 -18   3   15.16    0.52   0
  -2 -12   1   23.10    0.46   0
  -2   2   1   25.47    0.12   0
  -2  11   5   17.47    0.28   0
  -2  17  11   15.58    0.53   0
  -1 -26   8    0.17    0.94   0
  -1 -25   7    2.73    0.82   0
  -1 -22   5   14.07    0.72   0
  -1 -16   2  134.80    0.73   0
  -1  10   4  214.18    0.48   0
  -1  20  16    0.30    0.72   0
   0 -25   7    2.71    0.80   0
   0 -24   6    2.02    0.70   0
   0 -19   3    1.44    0.50   0
   0   4   1    5.04    0.16   0
   0  13   6    5.78    0.38   0
   0  14   7    0.78    0.39   0
   0  15   8   20.61    0.47   0
   0  16   9    0.84    0.49   0
   1 -10   0   16.45    0.25   0
   1  12   5   19.45    0.39   0
   1  13   6   39.11    0.48   0
   1  16   9    1.85    0.52   0
   1  17  10    0.27    0.56   0
   2 -25   7    6.10    0.77   0
   2   4   1   43.36    0.30   0
   2  13   6    9.26    0.48   0
   2  16   9    3.28    0.59   0
   3  -8   0  197.81    0.23   0
   3  10   4  168.87    0.67   0
   3  18  12    1.38    0.78   0
   4  -3   0   55.25    0.25   0
   4  16  10   39.47    0.71   0
   5   1   1   15.52    0.35   0
   5  10   5   23.33    0.50   0
   5  17  12    1.65    0.74   0
   5  19  15    4.61    1.05   0
   6  -9   1  107.18    0.22   0
   6  -2   1   74.33    0.41   0
   6   3   2   24.16    0.44   0
   6   9   5   12.01    0.49   0
   6  13   8    9.37    0.60   0
   6  14   9    4.67    0.73   0
   6  17  13   15.20    0.88   0
   6  18  15   -0.67    0.93   0
   7   0   2   62.27    0.48   0
   7   6   4   45.27    0.62   0
   7   8   5   17.19    0.63   0
   7  11   7   13.63    0.76   0
   7  12   8    4.72    0.75   0
   7  13   9    2.23    0.65   0
   7  14  10   -0.04    0.80   0
   7  15  11   26.10    1.00   0
   7  17  14    0.99    1.14   0
   8 -12   3   27.89    0.25   0
   8   1   3   26.50    0.52   0
   8   4   4   69.73    0.69   0
   8   6   5   17.27    0.53   0
   8   8   6   15.95    0.71   0
   8  11   8    3.27    0.80   0
   8  12   9    4.98    0.83   0
   8  13  10    9.15    0.93   0
   8  14  11    6.02    0.95   0
   8  16  14    5.07    1.21   0
   9   1   4    5.43    0.59   0
   9   4   5    9.78    0.64   0
   9   6   6   15.17    0.73   0
   9   8   7    3.92    0.76   0
   9   9   8    0.01    0.66   0
   9  14  13    2.80    0.93   0
   9  15  14    1.17    1.18   0
  10 -12   5    2.83    0.41   0
  10   0   5    4.53    0.60   0
  10   3   6   24.61    0.72   0
  10   7   8    6.17    0.68   0
  10  10  10   20.47    0.99   0
  10  11  11    6.24    1.01   0
  10  12  12    9.46    1.10   0
  11 -11   6   10.03    0.53   0
  11 -10   6    0.58    0.48   0
  11  -2   6    3.56    0.67   0
  11  -1   6    1.53    0.68   0
  11   2   7    5.85    0.75   0
  11   4   8   15.13    0.74   0
  11   6   9   12.89    0.81   0
  11   8  10   20.74    1.01   0
  11   9  11    6.80    1.05   0
  11  10  12   11.09    1.17   0
  11  11  13    7.85    1.23   0
  12  -7   7    5.50    0.69   0
  12  -6   7   12.18    0.76   0
  12  -5   7   10.44    0.76   0
  12   0   8    3.20    0.80   0
  12   3   9   13.26    0.96   0
  12   5  10    2.05    0.98   0
  12   6  11    5.07    0.86   0
  12   8  12    4.65    1.12   0
  13  -9   9    0.34    0.79   0
  13  -8   9    0.10    0.79   0
  13  -7   9    1.56    0.76   0
  13  -6   9    2.67    0.80   0
  13  -5   9   -0.38    0.81   0
  13  -4   9    5.26    0.84   0
  13  -3   9    0.13    0.91   0
  13   0  10    2.73    0.93   0
  13   1  10    1.84    0.97   0
  13   3  11    9.64    1.09   0
  13   4  12   10.52    1.00   0
  13   5  12    0.18    1.12   0
 -12 -10  13    0.21    0.88   0
 -12  -9  13    0.57    1.01   0
 -12  -8  13   -0.32    1.00   0
 -12  -7  13    0.76    0.96   0
 -12  -6  13   -0.31    0.91   0
 -12  -5  13    2.52    0.87   0
 -12  -4  13    1.44    0.83   0
 -12  -3  13    0.96    0.81   0
 -12   0  14    6.60    0.74   0
 -12   2  15   -0.24    0.77   0
 -11 -14  12    0.79    0.94   0
 -11 -13  12    0.10    1.04   0
 -11 -11  11    1.09    0.81   0
 -11 -10  11    0.47    0.91   0
 -11  -1  11    3.30    0.62   0
 -11   2  12    6.66    0.63   0
 -11   5  14    2.10    0.59   0
 -10 -16  11    0.33    1.08   0
 -10 -14  10    8.00    0.88   0
 -10 -11   9    8.89    0.88   0
 -10 -10   9    1.34    0.80   0
 -10   0   9    2.06    0.52   0
 -10   6  12    7.92    0.48   0
  -9 -19  11   -0.06    1.12   0
  -9 -18  10    1.00    0.90   0
  -9 -17  10    0.34    0.98   0
  -9 -16   9    1.12    0.80   0
  -9 -13   8    6.99    0.85   0
  -9 -10   7    1.12    0.62   0
  -9  -9   7    2.81    0.71   0
  -9  -1   7   61.74    0.58   0
  -8 -21  11    1.15    1.16   0
  -8 -20  10    1.01    1.08   0
  -8 -19   9    2.01    0.86   0
  -8 -17   8    0.18    0.74   0
  -8 -15   7    2.02    0.71   0
  -8 -14   7    4.08    0.78   0
  -8 -12   6    4.26    0.62   0
  -8 -11   6    0.24    0.69   0
  -8  -5   5    3.46    0.44   0
  -8   1   6   16.47    0.44   0
  -7 -22  10    1.06    1.15   0
  -7 -21   9   -0.18    0.90   0
  -7 -19   8    6.02    0.95   0
  -7 -17   7    0.96    0.84   0
  -7 -15   6   12.79    0.81   0
  -7 -13   5   11.02    0.61   0
  -7 -12   5   22.09    0.73   0
  -7  -8   4    0.62    0.43   0
  -7  -7   4    1.49    0.52   0
  -7  -6   4   14.37    0.51   0
  -7  -5   4   25.68    0.51   0
  -7  -4   4   21.77    0.47   0
  -7  -3   4    8.42    0.42   0
  -7  -2   4   43.54    0.44   0
  -7   2   5   10.96    0.36   0
  -6 -22   9    1.02    1.04   0
  -6 -21   8    0.66    0.96   0
  -6 -18   6    0.03    0.67   0
  -6 -15   5    8.12    0.69   0
  -6 -13   4    7.35    0.54   0
  -6  -8   3   10.27    0.42   0
  -6  -7   3   82.23    0.59   0
  -6  -6   3    3.61    0.44   0
  -6  -3   3    0.94    0.39   0
  -6  -2   3  120.28    0.52   0
  -5 -24   9    1.55    0.94   0
  -5 -21   7    0.54    0.88   0
  -5 -19   6   13.77    0.80   0
  -5 -15   4    4.68    0.68   0
  -5 -12   3    4.46    0.58   0
  -5  -7   2   14.42    0.39   0
  -5  -6   2  335.58    0.75   0
  -5  -5   2   12.23    0.42   0
  -5  -4   2   41.20    0.44   0
  -5  -3   2   65.98    0.40   0
  -5  15  11    8.08    0.30   0
  -4 -25   9    0.80    0.91   0
  -4 -22   7   10.12    0.93   0
  -4 -21   6    0.23    0.67   0
  -4 -19   5    3.24    0.73   0
  -4 -17   4   18.78    0.71   0
  -4 -11   2   66.28    0.59   0
  -4  16  11   11.41    0.40   0
  -4  18  14    2.03    0.52   0
  -4  19  16    1.13    0.58   0
  -3 -23   7   -0.85    0.90   0
  -3 -22   6    0.46    0.67   0
  -3 -20   5    8.24    0.77   0
  -3 -18   4    1.52    0.64   0
  -3 -16   3    2.36    0.57   0
  -3 -13   2   42.72    0.56   0
  -3  -9   1   33.01    0.46   0
  -3  13   7   19.60    0.30   0
  -3  14   8   15.21    0.34   0
  -3  15   9    2.84    0.36   0
  -3  18  13   12.00    0.54   0
  -3  19  15    1.89    0.59   0
  -2 -26   9    3.43    0.97   0
  -2 -25   8    1.84    0.95   0
  -2 -24   7   10.77    0.87   0
  -2 -21   5    2.63    0.70   0
  -2 -19   4    0.55    0.64   0
  -2 -17   3   18.97    0.60   0
  -2 -15   2    3.31    0.41   0
  -2 -11   1   24.41    0.45   0
  -2  18  12    9.92    0.56   0
  -1 -23   6    1.55    0.75   0
  -1 -20   4   18.34    0.65   0
  -1 -18   3    6.88    0.55   0
  -1  -7   0   15.36    0.29   0
  -1  -2   0 1412.51    0.68   0
  -1  13   6   31.53    0.42   0
  -1  14   7   11.17    0.37   0
  -1  15   8    0.95    0.39   0
  -1  16   9    1.13    0.42   0
  -1  17  10    1.38    0.53   0
  -1  19  13   -0.01    0.66   0
  -1  20  15    0.24    0.74   0
   0 -26   8    2.58    0.87   0
   0 -22   5    5.15    0.66   0
   0   9   3    6.30    0.31   0
   0  12   5    0.17    0.33   0
   0  17  10    1.50    0.52   0
   0  19  13    4.15    0.64   0
   0  20  15    2.50    0.76   0
   1   7   2   40.71    0.32   0
   1   9   3   10.73    0.34   0
   1  18  11    4.53    0.63   0
   2 -26   8    1.93    0.75   0
   2  -9   0    9.66    0.20   0
   2   9   3   38.00    0.43   0
   2  12   5  107.96    0.54   0
   2  17  10    2.22    0.53   0
   2  18  11    7.56    0.71   0
   3  12   5   74.19    0.61   0
   3  13   6   18.84    0.47   0
   3  16   9    1.39    0.54   0
   3  17  10    3.03    0.68   0
   4  -2   0  142.39    0.33   0
   4   3   1   10.32    0.29   0
   4   8   3   26.61    0.41   0
   5   5   2   24.51    0.47   0
   5   9   4   15.85    0.44   0
   5  12   6    8.28    0.49   0
   5  16  10    4.36    0.66   0
   5  18  13    7.69    0.81   0
   5  19  14    0.44    1.00   0
   6  -1   1    9.31    0.32   0
   6   6   3   74.55    0.58   0
   6   8   4   33.95    0.51   0
   6  10   5    1.52    0.57   0
   6  11   6   12.54    0.54   0
   6  16  11    0.68    0.73   0
   6  17  12    0.96    0.97   0
   6  18  14    0.78    0.90   0
   7   1   2   25.50    0.45   0
   7   4   3   10.50    0.42   0
   7  10   6   13.51    0.58   0
   7  16  12   18.05    0.89   0
   7  17  13   20.62    1.13   0
   8   2   3    6.35    0.50   0
   8   5   4   14.31    0.60   0
   8   7   5   13.51    0.67   0
   8  10   7    2.46    0.61   0
   8  15  12    5.01    0.87   0
   8  16  13    2.29    1.14   0
   9  -7   3   26.36    0.46   0
   9  -6   3   26.21    0.46   0
   9  -5   3   14.42    0.47   0
   9  -4   3   41.87    0.54   0
   9  -3   3   13.58    0.51   0
   9   2   4  169.49    0.85   0
   9   5   5    2.51    0.67   0
   9   7   6   15.46    0.74   0
   9  10   8    7.33    0.82   0
   9  11   9    1.38    0.74   0
   9  12  10    8.47    0.80   0
   9  13  11   10.36    0.86   0
   9  14  12   11.00    1.05   0
   9  15  13    1.03    1.15   0
  10  -6   4   12.50    0.50   0
  10  -5   4    7.91    0.53   0
  10  -4   4   10.58    0.57   0
  10   1   5   13.13    0.63   0
  10   4   6    7.44    0.71   0
  10   6   7    3.84    0.66   0
  10   8   8   17.66    0.88   0
  10   9   9   -1.34    0.73   0
  10  13  13    0.84    0.96   0
  11 -17   8    0.76    0.35   0
  11   0   6    7.42    0.70   0
  11   3   7    4.08    0.76   0
  11   5   8   15.23    0.74   0
  11   7   9    0.51    0.92   0
  11  10  11    1.96    1.06   0
  11  11  12    3.04    1.12   0
  12 -13   8    1.17    0.58   0
  12  -9   7    1.95    0.63   0
  12  -8   7    4.39    0.65   0
  12  -4   7   13.35    0.73   0
  12  -3   7   10.04    0.75   0
  12  -2   7   10.50    0.76   0
  12   1   8    6.00    0.71   0
  12   2   8   18.64    0.90   0
  12   4   9    7.40    0.96   0
  12   6  10    6.85    1.03   0
  12   7  11    4.78    0.94   0
  13 -10   9    0.69    0.75   0
  13  -2   9   23.13    0.93   0
  13  -1   9    1.18    0.90   0
  13   2  10   16.96    1.06   0
  13   4  11    0.33    1.11   0
 -12  -2  14    4.54    0.89   0
 -12  -1  14    1.15    0.76   0
 -12   1  15    0.96    0.82   0
 -11 -14  13    0.55    1.16   0
 -11 -12  12    0.64    0.99   0
 -11 -11  12    0.56    0.95   0
 -11  -9  11    0.07    0.74   0
 -11  -8  11    1.54    0.87   0
 -11  -7  11    4.83    0.85   0
 -11  -6  11    6.87    0.81   0
 -11  -5  11    2.49    0.75   0
 -11  -4  11    3.58    0.72   0
 -11  -3  11    2.93    0.69   0
 -11  -2  11    8.56    0.68   0
 -11   1  12    0.33    0.65   0
 -11   3  13    2.14    0.62   0
 -11   6  15    4.74    0.60   0
 -11   7  16    0.28    0.58   0
 -10 -17  12   -0.18    0.99   0
 -10 -16  12    1.43    1.11   0
 -10 -15  11    0.28    0.91   0
 -10 -13  10    5.24    0.83   0
 -10 -12  10    3.00    0.95   0
 -10  -9   9    3.10    0.66   0
 -10  -8   9    0.18    0.76   0
 -10  -7   9    0.74    0.70   0
 -10  -3   9   10.42    0.68   0
 -10  -2   9    8.17    0.60   0
 -10  -1   9   22.53    0.58   0
 -10   2  10   17.04    0.57   0
 -10   4  11    4.10    0.49   0
 -10   7  13   12.47    0.48   0
 -10   8  14    0.72    0.45   0
 -10   9  15    7.86    0.48   0
  -9 -18  11    2.78    1.07   0
  -9 -16  10   10.91    0.98   0
  -9 -15   9   -0.29    0.76   0
  -9 -14   9   -0.42    0.90   0
  -9 -12   8    1.27    0.66   0
  -9 -11   8   14.81    0.78   0
  -9  -8   7   17.00    0.60   0
  -9  -7   7   11.95    0.66   0
  -9  -6   7   13.18    0.65   0
  -9  -5   7   10.87    0.60   0
  -9  -4   7    2.55    0.55   0
  -9  -3   7   11.93    0.55   0
  -9  -2   7    1.63    0.49   0
  -9   2   8   55.64    0.52   0
  -9   4   9    0.85    0.39   0
  -9   6  10    3.04    0.38   0
  -8 -19  10   -0.51    1.06   0
  -8 -18   9    1.02    0.82   0
  -8 -16   8    7.32    0.77   0
  -8 -13   7   27.99    0.84   0
  -8 -10   6    7.30    0.67   0
  -8  -9   6    5.73    0.64   0
  -8   0   6    9.05    0.45   0
  -7 -21  10   -0.07    1.12   0
  -7 -20   9    0.73    0.85   0
  -7 -18   8   10.89    0.93   0
  -7 -16   7   15.02    0.83   0
  -7 -14   6    7.14    0.76   0
  -7 -11   5   14.59    0.66   0
  -6 -23  10    0.87    0.96   0
  -6 -20   8   14.94    0.99   0
  -6 -19   7    2.20    0.72   0
  -6 -17   6   -0.02    0.65   0
  -6 -14   5   33.10    0.74   0
  -6  -5   3    9.42    0.36   0
  -6  -4   3   24.04    0.38   0
  -6   2   4   34.69    0.33   0
  -6   7   6    8.88    0.18   0
  -5 -24  10    0.26    1.15   0
  -5 -23   9    0.15    0.97   0
  -5 -22   8    9.15    0.84   0
  -5 -20   7    0.75    0.86   0
  -5 -17   5   23.06    0.64   0
  -5 -14   4   23.27    0.67   0
  -5 -11   3   29.59    0.59   0
  -5   5   4   21.87    0.19   0
  -4 -25  10    0.03    1.08   0
  -4 -24   9   -0.58    1.03   0
  -4 -23   8    0.14    0.90   0
  -4 -20   6   13.17    0.83   0
  -4 -18   5    1.73    0.68   0
  -4 -16   4    1.05    0.64   0
  -4 -14   3   43.55    0.56   0
  -4 -10   2   41.09    0.51   0
  -4   1   2   24.08    0.25   0
  -3 -25   9   -0.35    1.00   0
  -3 -24   8    3.08    0.78   0
  -3 -21   6   -0.03    0.76   0
  -3  -8   1   67.49    0.43   0
  -3  -7   1    6.48    0.39   0
  -3  -1   1    0.77    0.22   0
  -3  12   6   60.95    0.30   0
  -3  16  10    1.42    0.37   0
  -3  17  11    4.64    0.46   0
  -2 -22   6   13.34    0.81   0
  -2 -14   2   80.15    0.60   0
  -2   8   3   36.84    0.20   0
  -2  15   8   24.89    0.45   0
  -1 -26   9    1.65    1.01   0
  -1 -25   8    2.67    0.88   0
  -1 -24   7    5.24    0.80   0
  -1 -21   5    4.24    0.66   0
  -1  -6   0    1.41    0.26   0
  -1  -5   0   67.53    0.32   0
  -1  -3   0    8.98    0.22   0
  -1  12   5   28.73    0.36   0
  -1  18  11    7.49    0.57   0
   0 -24   7    3.63    0.84   0
   0 -23   6    0.98    0.70   0
   0 -20   4    0.68    0.54   0
   0 -18   3    6.38    0.50   0
   0   7   2   84.56    0.30   0
   0  20  14    7.10    0.74   0
   1  -9   0   19.44    0.23   0
   1  11   4   33.25    0.41   0
   1  15   7    5.25    0.47   0
   1  19  12   11.93    0.70   0
   1  20  14    0.96    0.77   0
   2  11   4   36.64    0.46   0
   2  19  12    1.07    0.75   0
   3   0   0   70.84    0.27   0
   3   7   2   46.19    0.39   0
   3   9   3   16.07    0.37   0
   4  13   6    8.14    0.48   0
   4  20  15    2.33    0.87   0
   5   2   1   29.82    0.34   0
   5   8   3    5.37    0.46   0
   5  11   5   14.81    0.48   0
   5  18  12    5.54    0.88   0
   6   0   1    8.87    0.35   0
   6   4   2    4.54    0.45   0
   6  13   7    3.39    0.70   0
   6  14   8    9.02    0.62   0
   6  15   9    4.18    0.66   0
   6  18  13    2.61    0.83   0
   7   2   2    1.61    0.43   0
   7   5   3   12.94    0.53   0
   7   7   4   13.97    0.49   0
   7   9   5   10.21    0.53   0
   7  12   7    5.59    0.73   0
   7  13   8    2.59    0.63   0
   7  14   9    7.03    0.68   0
   7  15  10    8.88    0.77   0
   7  16  11    4.71    0.99   0
   7  18  14    1.46    1.17   0
   8  -7   2   17.89    0.35   0
   8  -6   2   11.38    0.33   0
   8  -5   2   11.77    0.36   0
   8  -4   2   12.85    0.39   0
   8  -3   2   12.30    0.43   0
   8   3   3   19.80    0.55   0
   8   9   6    0.76    0.57   0
   8  11   7    2.97    0.76   0
   8  12   8   11.96    0.81   0
   8  13   9    7.40    0.72   0
   8  14  10   15.05    0.80   0
   8  15  11   30.49    1.08   0
   8  16  12    7.74    1.07   0
   8  17  14    0.59    1.00   0
   9 -13   4    7.26    0.27   0
   9  -8   3   17.74    0.41   0
   9  -2   3   37.67    0.53   0
   9  -1   3   15.12    0.58   0
   9   3   4   40.62    0.69   0
   9   9   7    6.59    0.65   0
   9  12   9   -0.80    0.89   0
   9  13  10   19.21    1.01   0
   9  14  11    2.78    0.98   0
  10 -13   5    4.11    0.37   0
  10  -8   4   65.36    0.57   0
  10  -7   4    4.96    0.46   0
  10  -3   4   19.34    0.56   0
  10  -2   4   34.75    0.61   0
  10   2   5   11.16    0.56   0
  10   3   5   11.90    0.67   0
  10   5   6   11.10    0.72   0
  10   7   7   16.52    0.81   0
  10   9   8    5.10    0.84   0
  10  10   9    1.06    0.89   0
  10  11  10    7.96    0.83   0
  10  12  11    7.15    0.87   0
  10  13  12    5.65    0.91   0
  10  14  13    4.77    1.16   0
  11 -15   7    0.40    0.41   0
  11 -12   6    3.60    0.48   0
  11  -6   5   44.13    0.67   0
  11  -5   5    8.03    0.65   0
  11  -4   5    3.98    0.63   0
  11   1   6    4.27    0.67   0
  11   2   6   19.19    0.73   0
  11   4   7   19.35    0.72   0
  11   6   8   30.69    0.79   0
  11   8   9    7.24    0.99   0
  11   9  10    1.33    0.86   0
  11  12  13    0.09    1.05   0
  12 -14   8    6.95    0.58   0
  12 -10   7    2.96    0.58   0
  12  -1   7   12.88    0.80   0
  12   0   7    0.14    0.79   0
  12   3   8    1.66    0.91   0
  12   5   9    5.12    0.95   0
  12   7  10    0.31    1.02   0
  12   8  11    3.99    0.95   0
  12   9  12    1.77    1.01   0
  13  -6   8    3.53    0.82   0
  13  -5   8    1.85    0.87   0
  13  -4   8   20.18    0.94   0
  13   0   9    1.77    0.93   0
  13   1   9    4.52    0.95   0
  13   3  10    1.69    1.03   0
  13   5  11    3.93    1.16   0
 -12  -8  14    0.61    0.96   0
 -12  -7  14    3.38    0.98   0
 -12  -6  14    1.50    0.93   0
 -12  -5  14    0.50    0.91   0
 -12  -4  14    1.77    0.88   0
 -12  -3  14    1.38    0.82   0
 -12  -1  15    0.73    0.87   0
 -12   0  15    3.73    0.76   0
 -11 -13  13    1.23    1.05   0
 -11 -12  13    0.55    1.03   0
 -11 -10  12    5.50    0.97   0
 -11  -9  12    1.93    0.92   0
 -11  -1  12    3.09    0.69   0
 -11   0  12    6.28    0.61   0
 -11   2  13    0.31    0.63   0
 -11   4  14    3.03    0.61   0
 -10 -15  12   -0.31    1.11   0
 -10 -14  11    4.67    0.86   0
 -10 -13  11    5.23    0.99   0
 -10 -11  10    2.12    0.87   0
 -10 -10  10   32.08    0.94   0
 -10  -6   9    0.89    0.55   0
 -10  -5   9    4.09    0.63   0
 -10  -4   9    5.48    0.62   0
 -10   1  10   -0.21    0.49   0
 -10   5  12   18.25    0.54   0
  -9 -19  12    0.79    0.99   0
  -9 -17  11   -0.70    1.04   0
  -9 -15  10   -0.87    0.93   0
  -9 -13   9   -0.21    0.85   0
  -9 -10   8   47.67    0.87   0
  -9   1   8    3.83    0.43   0
  -9   7  11    0.16    0.40   0
  -8 -20  11    0.35    0.94   0
  -8 -18  10    5.59    1.00   0
  -8 -17   9    0.93    0.79   0
  -8 -15   8    0.53    0.72   0
  -8 -12   7    2.93    0.76   0
  -8  -8   6    5.94    0.61   0
  -8  -7   6    6.87    0.58   0
  -8  -2   6   22.72    0.48   0
  -8  -1   6   11.46    0.43   0
  -8   3   7    2.93    0.37   0
  -8   7   9    0.62    0.31   0
  -7 -22  11    0.27    0.99   0
  -7 -19   9    0.05    0.94   0
  -7 -17   8   -0.52    0.85   0
  -7 -13   6    5.20    0.71   0
  -7 -10   5   31.31    0.56   0
  -7  -9   5    5.69    0.57   0
  -7   1   5   81.87    0.45   0
  -7   4   6   16.35    0.33   0
  -7   8   8   63.57    0.29   0
  -6 -23  11   -0.30    1.14   0
  -6 -22  10    5.69    1.11   0
  -6 -21   9    0.83    0.97   0
  -6 -18   7   10.73    0.69   0
  -6 -16   6   35.47    0.84   0
  -6 -10   4   58.66    0.66   0
  -5 -21   8    0.29    0.93   0
  -5 -18   6   37.29    0.84   0
  -5 -16   5   10.21    0.71   0
  -5 -13   4    2.46    0.58   0
  -5 -10   3   18.56    0.52   0
  -5   7   5   55.79    0.17   0
  -5  18  15    1.78    0.45   0
  -4 -22   8    0.66    0.86   0
  -4 -21   7    5.47    0.82   0
  -4 -13   3   16.25    0.48   0
  -4  -9   2   56.36    0.46   0
  -4  11   6   14.24    0.17   0
  -4  17  12    1.09    0.39   0
  -3 -23   8    1.09    0.87   0
  -3 -22   7    3.01    0.82   0
  -3 -19   5    3.07    0.70   0
  -3 -17   4   21.17    0.66   0
  -3 -15   3    7.97    0.48   0
  -3 -12   2    5.27    0.38   0
  -3  -6   1  123.29    0.49   0
  -3  -5   1    2.22    0.34   0
  -3  -2   1   14.31    0.27   0
  -3   9   4   23.40    0.17   0
  -3  19  14    0.60    0.54   0
  -3  20  16    8.96    0.68   0
  -2 -26  10    1.53    1.00   0
  -2 -25   9   -1.09    0.93   0
  -2 -24   8    2.14    0.89   0
  -2 -23   7    0.33    0.78   0
  -2 -20   5    3.16    0.65   0
  -2 -18   4   36.45    0.68   0
  -2 -16   3   11.66    0.56   0
  -2 -10   1   19.90    0.35   0
  -2  10   4   11.84    0.23   0
  -2  14   7   34.76    0.39   0
  -2  16   9    5.73    0.41   0
  -2  17  10    1.00    0.46   0
  -2  19  13    5.29    0.61   0
  -1 -22   6   -0.28    0.72   0
  -1 -19   4    1.04    0.56   0
  -1 -17   3    7.82    0.52   0
  -1  -4   0    7.49    0.20   0
   0 -26   9   -0.13    0.88   0
   0 -25   8    0.37    0.81   0
   0  11   4   24.53    0.34   0
   0  14   6   43.29    0.49   0
   0  15   7    3.75    0.42   0
   0  16   8   80.46    0.62   0
   1   1   0   18.95    0.13   0
   1   5   1  580.26    0.60   0
   1  14   6   27.05    0.48   0
   1  17   9    2.57    0.54   0
   1  18  10    1.11    0.60   0
   1  20  13    8.92    0.75   0
   1  21  15    0.60    0.84   0
   2   1   0   24.19    0.19   0
   2   5   1    5.96    0.25   0
   2  13   5    5.31    0.44   0
   2  18  10    5.60    0.67   0
   2  21  15    0.96    0.92   0
   3  11   4    8.89    0.39   0
   3  14   6   25.01    0.59   0
   3  17   9   16.54    0.71   0
   3  19  12    2.62    0.68   0
   4  -1   0    3.66    0.21   0
   4   4   1   13.34    0.31   0
   4   9   3   49.34    0.46   0
   4  20  14   13.31    1.04   0
   5   3   1   19.10    0.41   0
   5   6   2   64.90    0.47   0
   5  10   4    9.96    0.44   0
   5  14   7   25.90    0.62   0
   5  16   9    7.39    0.65   0
   5  17  10    0.09    0.80   0
   5  18  11    5.93    0.86   0
   5  19  13    7.86    0.88   0
   6   1   1   11.41    0.37   0
   6   5   2    8.44    0.45   0
   6   7   3   26.33    0.46   0
   6   9   4    3.62    0.48   0
   6  11   5    8.90    0.63   0
   6  12   6   17.12    0.59   0
   6  17  11    1.10    0.77   0
   6  18  12    8.91    1.02   0
   6  19  14    1.68    0.93   0
   7   3   2   29.00    0.49   0
   7   6   3  192.44    0.81   0
   7   8   4   18.00    0.62   0
   7  10   5    5.22    0.66   0
   7  11   6    4.59    0.58   0
   7  14   8   10.65    0.80   0
   7  15   9   15.05    0.84   0
   7  17  12    3.19    0.88   0
   7  18  13    1.55    1.12   0
   8  -8   2   12.07    0.32   0
   8  -2   2   45.21    0.46   0
   8  -1   2    7.58    0.43   0
   8   6   4    5.19    0.50   0
   8   8   5   24.20    0.61   0
   8  10   6   37.95    0.79   0
   8  14   9    1.82    0.86   0
   8  17  13   -0.27    1.14   0
   9  -9   3   11.15    0.39   0
   9   0   3   36.10    0.59   0
   9   4   4    1.02    0.62   0
   9   6   5   22.81    0.62   0
   9   8   6   24.88    0.64   0
   9  10   7    2.07    0.80   0
   9  11   8   12.61    0.74   0
   9  15  12    9.04    0.94   0
   9  16  13    0.70    1.24   0
  10  -9   4    0.29    0.43   0
  10  -1   4    6.76    0.57   0
  10   0   4   39.61    0.66   0
  10   4   5    6.07    0.69   0
  10   6   6    9.73    0.76   0
  10   8   7    8.09    0.84   0
  10  11   9    2.50    0.95   0
  10  12  10    2.53    1.00   0
  10  13  11    2.53    1.08   0
  10  14  12    0.48    1.15   0
  11  -8   5   15.23    0.59   0
  11  -7   5   30.26    0.60   0
  11  -3   5    3.83    0.60   0
  11  -2   5   10.01    0.65   0
  11  -1   5    7.46    0.67   0
  11   3   6   14.64    0.78   0
  11   5   7    4.29    0.70   0
  11   7   8    3.70    0.78   0
  11   9   9    2.21    1.02   0
  11  10  10    4.04    1.02   0
  11  11  11    7.40    0.94   0
  11  12  12    1.33    0.99   0
  12 -11   7    6.12    0.61   0
  12   1   7   10.08    0.83   0
  12   4   8   14.84    0.96   0
  12   6   9   11.02    0.96   0
  12   8  10   10.93    1.11   0
  12   9  11    7.14    1.14   0
  12  10  12    1.03    1.05   0
  13  -9   8    4.16    0.77   0
  13  -8   8   18.73    0.81   0
  13  -7   8    2.60    0.70   0
  13  -3   8    1.25    0.81   0
  13  -2   8    3.98    0.85   0
  13  -1   8    6.87    0.85   0
  13   2   9    1.77    1.00   0
  13   4  10    1.99    0.88   0
  13   6  11   14.19    1.17   0
 -12  -6  15   -0.87    1.00   0
 -12  -5  15    3.24    0.90   0
 -12  -4  15    0.60    0.89   0
 -12  -3  15    1.96    0.86   0
 -12  -2  15    4.49    0.83   0
 -11 -13  14    1.01    1.16   0
 -11 -11  13    1.64    1.03   0
 -11 -10  13    0.82    0.93   0
 -11  -8  12    3.78    0.86   0
 -11  -7  12    0.66    0.85   0
 -11  -6  12    4.27    0.83   0
 -11  -5  12    9.24    0.78   0
 -11  -4  12    0.23    0.72   0
 -11  -3  12    0.70    0.71   0
 -11  -2  12    3.80    0.67   0
 -11   1  13    2.29    0.68   0
 -11   3  14   -0.28    0.69   0
 -11   5  15    3.36    0.59   0
 -11   6  16    0.22    0.63   0
 -10 -16  13    0.89    1.13   0
 -10 -14  12    1.03    1.05   0
 -10 -12  11    4.62    0.92   0
 -10  -9  10    0.60    0.76   0
 -10  -8  10    7.65    0.77   0
 -10  -1  10    0.90    0.61   0
 -10   0  10    4.47    0.53   0
 -10   3  11    4.86    0.51   0
 -10   6  13    9.61    0.55   0
  -9 -18  12    5.29    0.98   0
  -9 -16  11   -0.57    0.99   0
  -9 -14  10    0.54    0.91   0
  -9 -12   9    1.18    0.79   0
  -9  -9   8    4.81    0.60   0
  -9  -8   8   18.47    0.73   0
  -9  -7   8    2.64    0.63   0
  -9  -1   8    2.01    0.48   0
  -9   0   8    1.50    0.45   0
  -9   3   9    2.99    0.43   0
  -9   5  10   19.14    0.45   0
  -8 -20  12    4.87    1.19   0
  -8 -19  11   -0.49    0.88   0
  -8 -17  10    0.58    0.91   0
  -8 -16   9   18.04    0.83   0
  -8 -14   8    0.77    0.67   0
  -8 -13   8   11.23    0.78   0
  -8 -11   7    1.07    0.58   0
  -8 -10   7   38.04    0.74   0
  -8  -6   6   78.43    0.62   0
  -8  -5   6   17.91    0.56   0
  -8  -4   6    2.05    0.51   0
  -8  -3   6   19.17    0.51   0
  -8   2   7   19.78    0.43   0
  -8   5   8   23.09    0.38   0
  -7 -21  11    3.89    1.07   0
  -7 -20  10   10.82    0.90   0
  -7 -18   9    6.04    0.92   0
  -7 -15   7   13.06    0.69   0
  -7 -12   6    4.42    0.67   0
  -7  -8   5   14.52    0.56   0
  -7  -7   5    0.45    0.51   0
  -7   0   5   69.71    0.46   0
  -6 -20   9    0.09    0.96   0
  -6 -19   8    4.92    0.74   0
  -6 -17   7    0.52    0.78   0
  -6 -15   6    6.50    0.74   0
  -6 -13   5   13.79    0.56   0
  -6  -9   4    2.50    0.44   0
  -6   1   4   11.53    0.29   0
  -5 -24  11    5.46    1.17   0
  -5 -23  10    1.95    1.03   0
  -5 -22   9    1.05    0.84   0
  -5 -19   7    7.38    0.69   0
  -5 -17   6    0.37    0.71   0
  -5 -15   5   30.61    0.74   0
  -5  -9   3   44.06    0.46   0
  -5  -8   3    7.91    0.45   0
  -5   1   3   22.55    0.27   0
  -4 -24  10   14.06    1.12   0
  -4 -23   9    0.58    0.95   0
  -4 -20   7    6.05    0.78   0
  -4 -19   6    4.94    0.63   0
  -4 -17   5    0.02    0.66   0
  -4 -15   4   46.75    0.61   0
  -4 -12   3   39.04    0.59   0
  -4  -8   2  225.18    0.65   0
  -4  -7   2   43.67    0.48   0
  -4   0   2  242.31    0.44   0
  -4  18  13   13.57    0.50   0
  -4  19  15    5.12    0.54   0
  -3 -25  10    0.97    1.01   0
  -3 -24   9    0.12    0.96   0
  -3 -20   6    9.46    0.78   0
  -3 -18   5    9.97    0.66   0
  -3 -14   3   20.73    0.56   0
  -3 -11   2   15.34    0.38   0
  -3  -4   1  113.60    0.38   0
  -3  -3   1    5.63    0.25   0
  -3  18  12    1.40    0.46   0
  -2 -21   6    4.67    0.67   0
  -2 -13   2   72.05    0.50   0
  -2  -9   1   30.76    0.36   0
  -2  13   6   11.76    0.31   0
  -2  18  11    6.03    0.53   0
  -1 -24   8   -0.22    0.83   0
  -1 -23   7   -0.56    0.75   0
  -1 -20   5   22.21    0.67   0
  -1   9   3    5.89    0.21   0
  -1  11   4   51.11    0.35   0
  -1  15   7    3.42    0.41   0
  -1  16   8   13.57    0.48   0
  -1  17   9    3.24    0.50   0
   0 -22   6   17.78    0.71   0
   0  13   5    2.32    0.40   0
   0  18  10   33.06    0.62   0
   0  20  13    0.36    0.66   0
   0  21  15    0.05    0.78   0
   1  -8   0   14.47    0.20   0
   1   8   2  291.08    0.57   0
   1  10   3   64.71    0.43   0
   1  19  11    4.15    0.65   0
   2 -26   9    1.88    0.78   0
   2  -8   0  113.80    0.26   0
   2   8   2   52.71    0.37   0
   2  10   3   20.44    0.35   0
   2  19  11    4.76    0.72   0
   3   1   0    9.73    0.20   0
   3  10   3   62.79    0.54   0
   3  18  10    4.78    0.60   0
   4   0   0  163.60    0.39   0
   4  15   7   25.51    0.60   0
   4  16   8    0.93    0.56   0
   5   9   3   40.55    0.56   0
   5  12   5    9.59    0.49   0
   5  19  12    0.57    0.98   0
   5  20  14    6.29    0.90   0
   6   2   1    1.81    0.38   0
   6   8   3   13.10    0.55   0
   6  10   4    5.75    0.59   0
   6  13   6   19.37    0.73   0
   6  15   8    3.02    0.62   0
   6  16   9    1.10    0.68   0
   6  17  10   -0.09    0.90   0
   6  19  13    0.43    1.06   0
   7  -5   1    9.41    0.31   0
   7  -4   1   10.12    0.32   0
   7  -3   1   16.74    0.36   0
   7  -2   1   98.88    0.49   0
   7  12   6   57.60    0.83   0
   7  13   7    0.53    0.64   0
   7  16  10    0.49    0.77   0
   7  17  11   13.98    1.04   0
   7  18  12    0.33    1.06   0
   8   0   2   48.02    0.52   0
   8   4   3   83.60    0.61   0
   8   7   4    4.01    0.61   0
   8   9   5   17.64    0.70   0
   8  12   7    2.68    0.78   0
   8  13   8    6.45    0.70   0
   8  15  10    0.67    0.79   0
   8  16  11    2.08    0.86   0
   8  17  12    1.32    1.16   0
   9   1   3    9.15    0.56   0
   9   5   4   22.60    0.67   0
   9   7   5   15.51    0.61   0
   9   9   6    2.20    0.76   0
   9  12   8    3.22    0.90   0
   9  13   9    9.93    0.81   0
   9  14  10    0.54    0.83   0
   9  15  11   12.35    1.08   0
   9  16  12    0.18    1.19   0
  10 -10   4    8.40    0.43   0
  10   1   4    8.86    0.62   0
  10   5   5   13.01    0.72   0
  10   7   6    0.53    0.79   0
  10   9   7    2.08    0.83   0
  10  10   8   -0.50    0.75   0
  11 -13   6    9.21    0.44   0
  11  -9   5   15.05    0.54   0
  11   0   5    1.62    0.68   0
  11   1   5    4.30    0.68   0
  11   4   6   12.57    0.81   0
  11   6   7   21.98    0.76   0
  11   8   8    9.77    0.93   0
  11  11  10    0.27    1.12   0
  11  12  11    0.17    1.12   0
  12 -12   7   20.58    0.62   0
  12  -7   6    1.79    0.65   0
  12  -6   6   10.11    0.70   0
  12  -5   6    3.06    0.63   0
  12  -4   6    6.52    0.69   0
  12  -3   6    4.33    0.70   0
  12  -2   6   23.72    0.76   0
  12  -1   6    7.23    0.79   0
  12   2   7   12.81    0.73   0
  12   3   7    1.62    0.85   0
  12   5   8    1.24    0.89   0
  12   7   9    4.74    0.99   0
  12   9  10    3.78    1.10   0
  12  10  11   -0.59    1.22   0
  13 -10   8    3.42    0.75   0
  13   0   8   15.30    0.95   0
  13   1   8    4.60    0.90   0
  13   3   9    3.31    0.98   0
  13   4   9    2.29    0.98   0
  13   5  10    2.20    0.93   0
  13   6  10    1.66    1.10   0
 -11 -12  14    1.84    1.07   0
 -11  -9  13    0.37    0.95   0
 -11  -8  13    1.59    0.87   0
 -11   0  13    2.06    0.69   0
 -10 -15  13   -0.18    0.93   0
 -10 -13  12    1.61    0.96   0
 -10 -11  11    1.78    0.75   0
 -10 -10  11    5.97    0.89   0
 -10  -7  10   -0.24    0.58   0
 -10  -6  10    5.28    0.69   0
 -10  -5  10    6.10    0.66   0
 -10  -4  10    1.53    0.63   0
 -10  -3  10    0.94    0.62   0
 -10  -2  10    9.08    0.62   0
 -10   2  11    2.70    0.55   0
 -10   4  12   14.90    0.58   0
 -10   7  14    2.12    0.52   0
  -9 -18  13    1.09    1.17   0
  -9 -17  12    1.64    0.90   0
  -9 -15  11    2.30    0.97   0
  -9 -13  10   18.44    0.95   0
  -9 -11   9    0.81    0.63   0
  -9 -10   9    9.11    0.78   0
  -9  -6   8   23.90    0.67   0
  -9  -5   8   17.61    0.64   0
  -9  -4   8    4.98    0.57   0
  -9  -3   8   16.31    0.56   0
  -9  -2   8   83.17    0.66   0
  -9   2   9    2.19    0.46   0
  -9   8  12   10.33    0.39   0
  -9  11  15    3.65    0.38   0
  -8 -18  11   -0.07    0.98   0
  -8 -15   9    0.44    0.71   0
  -8 -12   8   28.56    0.80   0
  -8  -9   7    2.11    0.66   0
  -7 -20  11    3.09    1.03   0
  -7 -19  10    1.35    0.93   0
  -7 -16   8    8.30    0.70   0
  -7 -14   7   18.49    0.67   0
  -7 -11   6    8.35    0.55   0
  -7  -6   5   20.41    0.52   0
  -7  -5   5   12.77    0.49   0
  -7  -4   5  125.79    0.63   0
  -7  -3   5    3.83    0.41   0
  -7  -2   5   22.41    0.43   0
  -7  -1   5   23.68    0.41   0
  -7   3   6   17.67    0.37   0
  -6 -23  12    1.40    1.19   0
  -6 -22  11    0.18    1.05   0
  -6 -21  10    0.67    0.83   0
  -6 -18   8   13.57    0.88   0
  -6 -16   7   12.55    0.78   0
  -6 -14   6   31.88    0.76   0
  -6 -12   5   15.67    0.53   0
  -6  -8   4   22.12    0.45   0
  -6  -7   4    9.65    0.47   0
  -6   0   4   17.29    0.33   0
  -6   4   5   29.45    0.29   0
  -5 -21   9    2.29    0.96   0
  -5 -20   8    8.78    0.76   0
  -5 -18   7   11.24    0.79   0
  -5 -14   5    9.31    0.63   0
  -5 -12   4   24.93    0.52   0
  -5  -7   3   23.81    0.46   0
  -5   0   3   71.90    0.39   0
  -4 -21   8    1.86    0.89   0
  -4 -18   6   24.56    0.79   0
  -4 -16   5   33.12    0.70   0
  -4 -14   4   20.16    0.61   0
  -4 -11   3   77.87    0.60   0
  -4  -6   2   42.01    0.45   0
  -4  -1   2    2.85    0.26   0
  -3 -22   8    3.81    0.81   0
  -3 -21   7    0.01    0.74   0
  -3 -16   4    8.24    0.48   0
  -3 -10   2  221.72    0.70   0
  -3   7   3   17.25    0.08   0
  -3  19  13    2.11    0.56   0
  -3  20  15    2.15    0.60   0
  -2 -24   9    3.84    0.87   0
  -2 -23   8    0.85    0.83   0
  -2 -22   7   10.25    0.67   0
  -2 -19   5    0.37    0.55   0
  -2 -17   4    2.21    0.57   0
  -2 -12   2    0.94    0.42   0
  -2  -8   1   44.80    0.41   0
  -2  12   5  113.07    0.41   0
  -2  19  12    2.71    0.55   0
  -1 -26  10    2.62    0.94   0
  -1 -25   9    0.60    0.84   0
  -1 -18   4   19.32    0.58   0
  -1 -16   3    0.65    0.47   0
  -1 -10   1   35.80    0.39   0
  -1   7   2   31.23    0.21   0
  -1  14   6   22.09    0.41   0
  -1  18  10    1.38    0.56   0
  -1  21  15    0.80    0.71   0
   0 -24   8    0.65    0.73   0
   0 -23   7    1.57    0.71   0
   0   5   1  500.56    0.47   0
   0  10   3   59.91    0.37   0
   0  19  11    4.60    0.60   0
   1  12   4   18.25    0.39   0
   1  16   7    5.41    0.48   0
   1  20  12    8.99    0.72   0
   1  21  14    4.16    0.82   0
   2   2   0  288.25    0.43   0
   2   6   1   59.83    0.37   0
   2  12   4   59.06    0.46   0
   2  16   7   15.26    0.58   0
   2  17   8    7.27    0.61   0
   2  20  12    1.31    0.75   0
   3  20  12   14.77    0.92   0
   4   1   0    2.74    0.26   0
   4   5   1    6.46    0.32   0
   4  13   5    2.04    0.47   0
   4  21  14    1.36    1.07   0
   5  -5   0   12.98    0.20   0
   5  -4   0  272.27    0.41   0
   5  -3   0    7.96    0.23   0
   5  -2   0    7.59    0.26   0
   5   4   1   13.35    0.35   0
   5  11   4    2.49    0.46   0
   5  15   7    9.86    0.60   0
   5  16   8   28.81    0.70   0
   5  17   9    1.08    0.66   0
   5  18  10   26.10    0.94   0
   5  20  13    2.67    1.00   0
   6   6   2   49.46    0.47   0
   6  12   5   15.67    0.68   0
   6  18  11    1.21    0.80   0
   6  19  12    7.67    1.06   0
   7  -6   1   18.66    0.28   0
   7  -1   1   19.23    0.38   0
   7   4   2   42.74    0.46   0
   7   7   3   28.92    0.53   0
   7   9   4    3.70    0.50   0
   7  11   5    5.61    0.67   0
   7  14   7   11.33    0.78   0
   7  15   8    0.26    0.80   0
   7  16   9    5.50    0.93   0
   7  17  10    1.51    0.94   0
   7  19  13    0.24    1.15   0
   8  -9   2    6.74    0.28   0
   8   1   2   23.97    0.42   0
   8   2   2  221.17    0.78   0
   8   5   3    4.53    0.50   0
   8   8   4   76.40    0.80   0
   8  10   5   17.06    0.72   0
   8  11   6    5.71    0.64   0
   8  14   8    6.62    0.89   0
   8  15   9   16.94    0.94   0
   8  16  10    1.70    1.02   0
   8  18  13    0.21    1.03   0
   9 -10   3   31.79    0.37   0
   9   2   3   26.74    0.53   0
   9   3   3   11.61    0.60   0
   9   6   4   37.77    0.75   0
   9   8   5    6.90    0.70   0
   9  10   6   22.30    0.84   0
   9  11   7    2.48    0.68   0
   9  14   9    1.10    0.93   0
   9  15  10    2.42    0.98   0
  10   2   4    1.75    0.52   0
  10   3   4    0.33    0.65   0
  10   6   5   19.40    0.76   0
  10   8   6    4.47    0.80   0
  10  11   8    9.90    0.92   0
  10  12   9    1.04    0.82   0
  10  13  10   12.28    0.89   0
  10  14  11    3.99    0.93   0
  10  15  12    2.10    1.03   0
  11 -10   5    3.58    0.47   0
  11   2   5   31.04    0.77   0
  11   5   6    2.78    0.80   0
  11   7   7   13.61    0.77   0
  11   9   8   -0.45    0.96   0
  11  10   9    2.66    0.85   0
  11  12  10    1.31    1.09   0
  11  13  11    1.69    1.14   0
  12  -9   6    2.00    0.63   0
  12  -8   6    6.98    0.63   0
  12   0   6   17.34    0.80   0
  12   1   6    1.77    0.75   0
  12   4   7   16.11    0.94   0
  12   6   8   19.48    0.85   0
  12   8   9    3.45    1.01   0
  13 -11   8    0.57    0.68   0
  13  -5   7    0.20    0.81   0
  13  -4   7    4.88    0.87   0
  13  -3   7    5.10    0.89   0
  13   2   8    1.16    0.95   0
  13   5   9    4.18    1.05   0
  13   7  10    2.49    1.13   0
  14  -3   9    1.20    0.96   0
  14  -2   9    1.69    0.96   0
  14  -1   9    1.37    0.96   0
 -12  -3  16    0.54    0.89   0
 -12  -2  16    1.58    0.87   0
 -11 -11  14    0.31    0.89   0
 -11 -10  14    4.27    1.04   0
 -11  -9  14    1.74    0.95   0
 -11  -7  13   10.56    0.85   0
 -11  -6  13    2.09    0.84   0
 -11  -5  13    2.62    0.81   0
 -11  -4  13    2.39    0.75   0
 -11  -3  13   -0.09    0.72   0
 -11  -2  13    1.19    0.69   0
 -11  -1  13    1.33    0.65   0
 -11   1  14   -0.36    0.70   0
 -11   2  14   14.19    0.69   0
 -11   4  15    0.18    0.64   0
 -11   5  16    0.02    0.69   0
 -10 -15  14    2.83    1.19   0
 -10 -14  13    0.10    0.90   0
 -10 -13  13    1.69    1.01   0
 -10 -12  12   39.19    0.95   0
 -10 -11  12   11.60    0.93   0
 -10  -9  11   -0.15    0.79   0
 -10  -8  11    2.41    0.78   0
 -10   0  11   15.19    0.63   0
 -10   1  11    3.02    0.51   0
 -10   8  15    5.24    0.48   0
 -10   9  16    0.64    0.49   0
  -9 -17  13    7.12    1.16   0
  -9 -16  12    0.79    0.87   0
  -9 -14  11    2.63    0.92   0
  -9 -12  10   68.87    1.01   0
  -9  -9   9    0.09    0.70   0
  -9  -8   9    1.23    0.67   0
  -9   1   9   24.98    0.56   0
  -9   4  10   52.59    0.53   0
  -9   6  11   19.90    0.44   0
  -9   9  13    0.70    0.36   0
  -9  10  14    1.83    0.37   0
  -8 -20  13    0.93    1.02   0
  -8 -19  12    0.25    0.90   0
  -8 -17  11    0.56    0.98   0
  -8 -16  10    0.77    0.79   0
  -8 -14   9    7.39    0.71   0
  -8 -11   8    8.48    0.73   0
  -8  -8   7    8.47    0.53   0
  -8  -7   7   10.25    0.59   0
  -8   0   7   92.78    0.60   0
  -8   1   7   20.80    0.41   0
  -8   4   8   42.59    0.42   0
  -8   8  10    6.07    0.30   0
  -7 -21  12    1.36    0.97   0
  -7 -18  10    8.32    0.96   0
  -7 -17   9    0.99    0.74   0
  -7 -15   8    7.07    0.67   0
  -7 -13   7   17.78    0.63   0
  -7 -10   6    6.29    0.51   0
  -7  -9   6   15.93    0.59   0
  -6 -20  10   13.27    1.03   0
  -6 -19   9    2.00    0.75   0
  -6 -17   8    3.04    0.80   0
  -6 -13   6   11.55    0.69   0
  -6 -11   5   12.12    0.50   0
  -6 -10   5    5.95    0.55   0
  -6  -6   4   15.47    0.39   0
  -6  -5   4    0.37    0.42   0
  -6  -4   4   56.24    0.49   0
  -6  -3   4   20.05    0.42   0
  -6  -2   4  151.14    0.56   0
  -6  -1   4   39.93    0.40   0
  -5 -24  12    9.59    1.01   0
  -5 -23  11   -1.31    0.90   0
  -5 -22  10   10.72    0.88   0
  -5 -19   8    1.16    0.82   0
  -5 -16   6    1.65    0.58   0
  -5 -11   4   13.10    0.46   0
  -5  -6   3   25.11    0.39   0
  -5  -5   3   25.81    0.44   0
  -5  -4   3   30.16    0.42   0
  -5  -1   3   29.60    0.35   0
  -4 -24  11    2.73    1.13   0
  -4 -23  10    0.54    0.95   0
  -4 -22   9    0.35    0.74   0
  -4 -19   7    3.14    0.78   0
  -4 -13   4   19.29    0.57   0
  -4 -10   3   21.42    0.49   0
  -4  -5   2  212.95    0.57   0
  -4  -4   2  494.18    0.74   0
  -4  -3   2    5.65    0.33   0
  -4  -2   2  149.14    0.44   0
  -4   4   3   35.95    0.18   0
  -4  15   9   13.58    0.34   0
  -3 -25  11    0.02    1.07   0
  -3 -24  10   -0.29    0.98   0
  -3 -23   9    0.07    0.74   0
  -3 -19   6    4.27    0.59   0
  -3 -17   5    0.60    0.63   0
  -3 -15   4    7.16    0.58   0
  -3 -13   3   60.39    0.51   0
  -3  -9   2    2.07    0.41   0
  -3  11   5   13.15    0.20   0
  -3  15   8    4.62    0.34   0
  -3  16   9    2.33    0.39   0
  -3  17  10    4.93    0.41   0
  -2 -26  11    0.91    0.88   0
  -2 -25  10    0.79    0.83   0
  -2 -20   6    6.76    0.58   0
  -2 -18   5   14.73    0.62   0
  -2  -7   1   57.19    0.41   0
  -1 -23   8    0.19    0.73   0
  -1 -22   7   23.82    0.79   0
  -1 -19   5    2.43    0.58   0
  -1   4   1  116.54    0.17   0
  -1  13   5    3.73    0.35   0
   0 -26  10    8.23    0.89   0
   0 -25   9    0.37    0.79   0
   0 -21   6    0.41    0.61   0
   0   8   2  108.07    0.34   0
   0  12   4  100.19    0.46   0
   0  20  12    4.28    0.64   0
   1 -26  10    0.23    0.91   0
   1 -25   9    1.10    0.73   0
   1   6   1  119.51    0.36   0
   1  15   6    9.63    0.47   0
   1  19  10    0.55    0.63   0
   1  21  13    0.81    0.76   0
   2   9   2   18.47    0.40   0
   2  11   3   13.00    0.42   0
   2  14   5   38.93    0.55   0
   2  19  10    2.43    0.69   0
   2  21  13    0.75    0.84   0
   3   2   0  109.52    0.33   0
   3   6   1   86.57    0.42   0
   3  11   3   99.29    0.60   0
   3  15   6   17.59    0.52   0
   3  18   9    0.82    0.57   0
   4   6   1   24.87    0.44   0
   4  12   4    9.65    0.47   0
   4  21  13   -0.13    0.97   0
   5  -6   0  147.27    0.27   0
   5  -1   0   13.22    0.26   0
   5   0   0   47.22    0.38   0
   5   5   1   93.83    0.54   0
   5  10   3    4.55    0.53   0
   5  13   5    7.30    0.51   0
   5  19  11    0.29    0.76   0
   5  20  12   16.82    1.06   0
   6   3   1   22.57    0.37   0
   6   7   2    8.15    0.51   0
   6   9   3   26.03    0.51   0
   6  11   4    5.31    0.59   0
   6  14   6    7.77    0.71   0
   6  16   8   -0.41    0.66   0
   6  17   9    0.37    0.72   0
   6  18  10   -0.19    0.93   0
   6  20  13    0.18    1.08   0
   7  -7   1  113.98    0.35   0
   7   0   1   16.67    0.38   0
   7   1   1    7.61    0.40   0
   7   5   2    3.62    0.41   0
   7   8   3   73.69    0.70   0
   7  10   4   66.48    0.76   0
   7  13   6    1.50    0.63   0
   7  18  11    2.27    0.87   0
   7  19  12   -0.27    1.06   0
   8   3   2   22.76    0.55   0
   8   6   3   81.93    0.65   0
   8  12   6    9.53    0.80   0
   8  13   7    0.98    0.68   0
   8  17  11    5.06    0.93   0
   8  18  12    0.43    1.15   0
   9  -3   2    9.64    0.47   0
   9   4   3   10.73    0.64   0
   9   7   4    1.57    0.68   0
   9   9   5   10.82    0.78   0
   9  12   7    1.82    0.84   0
   9  13   8   10.32    0.81   0
   9  16  11    1.51    0.95   0
  10 -14   5    3.42    0.29   0
  10 -11   4    4.98    0.39   0
  10  -5   3    2.43    0.49   0
  10  -4   3    7.19    0.53   0
  10  -3   3    3.95    0.49   0
  10  -2   3   33.13    0.58   0
  10  -1   3    4.20    0.60   0
  10   4   4   20.28    0.74   0
  10   7   5    7.65    0.77   0
  10   9   6    3.20    0.80   0
  10  10   7    5.21    0.74   0
  10  12   8   32.80    1.04   0
  10  13   9   10.73    1.00   0
  10  14  10   15.38    1.10   0
  10  15  11    4.27    1.13   0
  11  -5   4    0.83    0.57   0
  11  -4   4    0.87    0.61   0
  11  -3   4    3.81    0.64   0
  11  -2   4    7.38    0.66   0
  11   3   5    0.76    0.70   0
  11   6   6    1.56    0.81   0
  11   8   7    3.81    0.75   0
  11  10   8    5.15    1.03   0
  11  11   9    2.03    0.87   0
  12 -13   7    1.95    0.51   0
  12 -10   6    1.91    0.57   0
  12   2   6    9.03    0.83   0
  12   5   7    5.97    0.89   0
  12   7   8    3.77    0.83   0
  12   9   9    3.70    1.13   0
  12  10  10    3.07    0.99   0
  13  -8   7    1.71    0.76   0
  13  -7   7    1.68    0.76   0
  13  -6   7    1.78    0.70   0
  13  -2   7    5.11    0.81   0
  13  -1   7    0.66    0.83   0
  13   0   7    0.48    0.87   0
  13   3   8   -0.66    0.95   0
  13   4   8    8.77    1.03   0
  13   6   9    2.64    1.16   0
  14   1   9    0.83    1.08   0
 -11 -11  15    1.93    1.05   0
 -11 -10  15    6.24    1.06   0
 -11  -8  14    4.18    0.95   0
 -11  -7  14    7.13    0.91   0
 -11  -1  14    0.98    0.76   0
 -11   0  14    5.99    0.74   0
 -11   3  15    0.70    0.65   0
 -10 -14  14    2.20    1.12   0
 -10 -12  13    6.83    1.01   0
 -10 -10  12   13.03    0.93   0
 -10  -7  11    5.32    0.72   0
 -10  -6  11   13.35    0.74   0
 -10  -5  11    5.74    0.70   0
 -10  -4  11   21.68    0.70   0
 -10  -3  11    5.55    0.65   0
 -10  -2  11    5.91    0.63   0
 -10  -1  11    2.85    0.58   0
 -10   3  12    3.16    0.53   0
 -10   5  13   14.41    0.52   0
  -9 -16  13    1.38    1.10   0
  -9 -15  12   -0.58    0.84   0
  -9 -13  11    1.40    0.87   0
  -9 -11  10    3.04    0.68   0
  -9 -10  10    2.06    0.75   0
  -9  -7   9    5.71    0.68   0
  -9  -6   9    0.70    0.64   0
  -9  -1   9   32.58    0.60   0
  -9   0   9   -0.29    0.47   0
  -8 -19  13    3.32    1.12   0
  -8 -18  12   -0.76    0.87   0
  -8 -16  11    1.58    0.93   0
  -8 -15  10   16.92    0.79   0
  -8 -13   9    0.51    0.66   0
  -8 -10   8    3.90    0.69   0
  -8  -6   7   20.53    0.52   0
  -8  -5   7    1.94    0.54   0
  -8  -4   7   44.18    0.61   0
  -8  -3   7   26.36    0.54   0
  -8  -2   7    9.36    0.47   0
  -8  -1   7   26.54    0.47   0
  -8   6   9    7.61    0.33   0
  -8   9  11    2.07    0.31   0
  -7 -21  13   -0.39    1.19   0
  -7 -20  12    0.82    1.06   0
  -7 -17  10   -0.65    0.87   0
  -7 -16   9   17.62    0.75   0
  -7 -14   8    6.04    0.64   0
  -7 -12   7   25.35    0.64   0
  -7  -8   6   10.96    0.57   0
  -7   2   6   20.79    0.37   0
  -7   5   7   27.91    0.32   0
  -7   9   9   13.12    0.24   0
  -6 -22  12    4.65    0.99   0
  -6 -21  11    0.98    0.87   0
  -6 -18   9   15.97    0.89   0
  -6 -15   7   24.65    0.65   0
  -6 -12   6    9.73    0.62   0
  -6  -9   5    5.37    0.53   0
  -5 -23  12    1.49    1.07   0
  -5 -22  11    3.92    1.05   0
  -5 -21  10    1.07    0.98   0
  -5 -20   9   -0.19    0.73   0
  -5 -17   7   22.79    0.65   0
  -5 -15   6   12.08    0.68   0
  -5 -13   5    1.84    0.49   0
  -5 -10   4    1.74    0.41   0
  -5  -3   3    2.41    0.30   0
  -5  -2   3   22.95    0.31   0
  -5   4   4    4.27    0.19   0
  -4 -21   9    1.69    0.85   0
  -4 -20   8    1.51    0.76   0
  -4 -17   6   11.17    0.58   0
  -4 -15   5   18.57    0.53   0
  -4  -9   3    8.48    0.45   0
  -4  17  11    7.71    0.39   0
  -3 -21   8    6.61    0.81   0
  -3 -20   7   12.46    0.67   0
  -3 -18   6   25.36    0.73   0
  -3 -12   3   43.38    0.52   0
  -3  -8   2   54.64    0.47   0
  -3   3   2   34.56    0.15   0
  -3  14   7   45.80    0.35   0
  -3  18  11    3.95    0.46   0
  -3  20  14   -0.11    0.60   0
  -2 -23   9    0.24    0.83   0
  -2 -22   8    0.39    0.77   0
  -2 -21   7    1.63    0.60   0
  -2 -16   4   17.95    0.49   0
  -2 -11   2   30.02    0.38   0
  -2  -6   1  171.14    0.48   0
  -2   1   1    4.60    0.14   0
  -2   6   2  189.68    0.20   0
  -2  15   7    0.96    0.36   0
  -2  16   8   23.95    0.43   0
  -2  17   9   23.50    0.47   0
  -2  20  13    4.52    0.63   0
  -1 -26  11    1.02    0.97   0
  -1 -25  10    0.22    0.90   0
  -1 -24   9    6.79    0.87   0
  -1 -17   4    2.17    0.50   0
  -1 -15   3    1.98    0.37   0
  -1  -9   1   15.15    0.30   0
   0  15   6    2.24    0.39   0
   0  21  13    0.02    0.69   0
   1   2   0 1339.04    0.65   0
   1   9   2  103.52    0.43   0
   1  11   3    7.08    0.36   0
   1  20  11    1.50    0.66   0
   2  -7   0  102.20    0.23   0
   2   3   0  328.88    0.49   0
   2  13   4   14.23    0.46   0
   3 -26  10    1.56    0.79   0
   3 -25   9    0.07    0.67   0
   3  -7   0   41.01    0.12   0
   3   3   0   32.72    0.32   0
   4   2   0  116.74    0.38   0
   4   9   2   10.09    0.46   0
   4  14   5   17.99    0.52   0
   5   1   0   13.15    0.33   0
   5  12   4   19.01    0.51   0
   5  16   7   10.15    0.63   0
   5  17   8    1.19    0.65   0
   5  18   9    4.78    0.81   0
   5  19  10    1.51    0.90   0
   5  21  13    0.05    1.12   0
   6   4   1   85.36    0.49   0
   6  10   3    6.83    0.58   0
   6  13   5    6.89    0.57   0
   6  19  11    0.13    0.82   0
   6  20  12   -0.25    1.11   0
   7   2   1    8.48    0.43   0
   7   6   2   14.58    0.53   0
   7  12   5    7.51    0.60   0
   7  15   7    2.43    0.80   0
   7  16   8   11.23    0.90   0
   7  17   9    1.83    0.95   0
   7  18  10    7.57    1.04   0
   8   4   2   33.77    0.59   0
   8   7   3   11.32    0.61   0
   8   9   4    5.15    0.57   0
   8  11   5    4.54    0.62   0
   8  14   7    7.81    0.88   0
   8  15   8    4.96    0.75   0
   8  16   9    0.66    0.79   0
   8  17  10   -0.03    1.00   0
   8  18  11    2.19    1.16   0
   9  -6   2   10.34    0.43   0
   9  -5   2   10.98    0.43   0
   9  -4   2    9.54    0.40   0
   9  -2   2   65.23    0.55   0
   9  -1   2   45.59    0.55   0
   9   0   2  204.63    0.80   0
   9   5   3    1.10    0.62   0
   9  11   6    2.65    0.67   0
   9  13   7    3.26    0.88   0
   9  14   8   48.65    1.07   0
   9  15   9    4.80    0.96   0
   9  16  10   11.73    1.08   0
   9  17  11    0.57    1.19   0
  10  -7   3   18.05    0.48   0
  10  -6   3   31.97    0.50   0
  10   0   3   37.86    0.65   0
  10   1   3    8.14    0.60   0
  10   5   4   11.34    0.74   0
  10  11   7    2.62    0.76   0
  10  14   9    6.57    1.05   0
  10  15  10   10.37    1.11   0
  11 -14   6    1.53    0.39   0
  11 -11   5    0.82    0.42   0
  11  -7   4    8.96    0.56   0
  11  -6   4    4.61    0.56   0
  11  -1   4    3.93    0.64   0
  11   0   4    8.93    0.67   0
  11   1   4    1.11    0.66   0
  11   4   5   10.31    0.66   0
  11   5   5    5.92    0.82   0
  11   7   6    0.81    0.81   0
  11   9   7    5.52    0.91   0
  11  11   8    3.27    0.99   0
  11  12   9    2.65    1.08   0
  11  13  10    0.83    0.98   0
  12  -5   5    6.23    0.69   0
  12  -4   5   23.61    0.76   0
  12  -3   5    3.04    0.67   0
  12  -2   5    8.22    0.71   0
  12  -1   5    1.61    0.68   0
  12   3   6    0.62    0.69   0
  12   4   6    6.92    0.87   0
  12   6   7   10.21    0.79   0
  12   8   8   -0.01    0.84   0
  12  10   9    2.33    1.15   0
  12  11  10    0.43    1.02   0
  13  -9   7    0.70    0.70   0
  13   1   7    2.20    0.88   0
  13   2   7    5.09    0.94   0
  13   5   8    1.20    1.02   0
  13   7   9    0.69    1.15   0
  14  -4   8    0.60    0.96   0
  14  -3   8    1.84    1.01   0
  14  -2   8    3.29    1.01   0
  14  -1   8    0.83    1.03   0
 -11  -9  15    1.97    1.00   0
 -11  -8  15    2.25    0.91   0
 -11  -6  14    3.08    0.82   0
 -11  -5  14    1.10    0.84   0
 -11  -4  14   14.60    0.83   0
 -11  -3  14    0.44    0.74   0
 -11  -2  14    0.79    0.70   0
 -11   2  15    0.32    0.63   0
 -11   4  16    5.33    0.66   0
 -11   5  17    6.08    0.65   0
 -10 -15  15    0.69    0.99   0
 -10 -14  15   -0.61    1.10   0
 -10 -13  14    1.64    1.04   0
 -10 -11  13    6.15    0.99   0
 -10  -9  12    0.70    0.70   0
 -10  -8  12   17.38    0.85   0
 -10   1  12    1.37    0.59   0
 -10   2  12    2.38    0.49   0
 -10   4  13    0.61    0.50   0
 -10   6  14    7.96    0.51   0
  -9 -17  14    0.68    0.98   0
  -9 -15  13    3.11    1.03   0
  -9 -14  12   32.97    0.92   0
  -9 -12  11    5.57    0.77   0
  -9  -9  10    0.12    0.74   0
  -9  -5   9    3.55    0.50   0
  -9  -4   9    4.49    0.57   0
  -9  -3   9    7.60    0.56   0
  -9  -2   9    9.45    0.54   0
  -9   3  10    7.69    0.45   0
  -9   7  12    3.42    0.39   0
  -8 -19  14    1.19    1.11   0
  -8 -18  13    3.98    1.09   0
  -8 -17  12   -0.40    0.81   0
  -8 -15  11    2.61    0.86   0
  -8 -14  10   25.13    0.77   0
  -8 -12   9    2.73    0.64   0
  -8 -11   9    2.15    0.70   0
  -8  -9   8    6.68    0.57   0
  -8  -8   8    4.89    0.65   0
  -8   3   8   16.70    0.37   0
  -7 -20  13    0.24    1.10   0
  -7 -19  12   -1.23    1.00   0
  -7 -18  11    0.76    0.90   0
  -7 -15   9    0.66    0.66   0
  -7 -13   8    6.60    0.72   0
  -7 -11   7    7.36    0.56   0
  -7 -10   7    3.42    0.61   0
  -7  -7   6    3.75    0.44   0
  -7  -6   6    4.57    0.51   0
  -7   1   6    7.95    0.34   0
  -6 -22  13   -0.31    1.20   0
  -6 -21  12    0.59    1.09   0
  -6 -20  11   -0.07    0.95   0
  -6 -19  10    3.85    0.76   0
  -6 -17   9    0.36    0.79   0
  -6 -16   8    9.53    0.67   0
  -6 -14   7    7.29    0.60   0
  -6  -8   5   11.50    0.51   0
  -6   3   5   71.65    0.35   0
  -6   6   6    7.22    0.23   0
  -5 -19   9    1.91    0.85   0
  -5 -18   8    3.76    0.64   0
  -5 -16   7    1.75    0.72   0
  -5 -14   6    2.68    0.65   0
  -5 -12   5   23.46    0.52   0
  -5  -9   4   18.18    0.42   0
  -4 -24  12   -0.74    0.94   0
  -4 -23  11    0.80    0.85   0
  -4 -22  10   -0.09    0.79   0
  -4 -18   7    0.17    0.61   0
  -4 -16   6   15.29    0.71   0
  -4 -14   5    4.21    0.58   0
  -4 -12   4   18.24    0.47   0
  -4  -8   3   19.55    0.46   0
  -4  18  12   25.63    0.47   0
  -3 -25  12   -1.21    1.04   0
  -3 -24  11    0.03    0.97   0
  -3 -23  10    1.17    0.89   0
  -3 -22   9    6.16    0.74   0
  -3 -19   7    1.42    0.71   0
  -3 -16   5   25.74    0.61   0
  -3 -11   3   19.78    0.47   0
  -3  19  12    2.15    0.51   0
  -2 -25  11    1.29    0.84   0
  -2 -24  10   11.59    0.83   0
  -2 -20   7   23.37    0.73   0
  -2 -19   6    3.99    0.55   0
  -2 -17   5   45.01    0.66   0
  -2 -13   3   77.05    0.56   0
  -2 -10   2   58.59    0.47   0
  -2  -5   1   15.50    0.31   0
  -1  -8   1  149.44    0.46   0
  -1  10   3   71.66    0.33   0
  -1  12   4   21.43    0.33   0
  -1  16   7    7.03    0.45   0
  -1  18   9    0.22    0.55   0
   0 -26  11   -1.24    0.96   0
   0 -25  10    0.29    0.87   0
   0  11   3    2.86    0.32   0
   0  14   5    3.60    0.37   0
   0  20  11    0.22    0.60   0
   1  13   4   15.21    0.42   0
   1  17   7   26.90    0.56   0
   1  18   8   61.39    0.70   0
   1  21  12    0.68    0.73   0
   2 -18   4   19.43    0.44   0
   2   7   1   24.29    0.30   0
   2  16   6    9.67    0.57   0
   2  19   9   10.26    0.70   0
   3   7   1   12.55    0.33   0
   4   3   0   40.03    0.37   0
   4   7   1    6.19    0.43   0
   4  13   4   26.45    0.51   0
   4  21  12   -0.28    0.99   0
   5   2   0    9.71    0.35   0
   5   9   2   31.25    0.53   0
   5  11   3   44.26    0.54   0
   5  13   4    6.06    0.60   0
   5  14   5   23.46    0.59   0
   5  20  11    0.12    0.80   0
   5  21  12    2.16    1.03   0
   6 -12   2   27.70    0.15   0
   6  -3   0   22.23    0.29   0
   6  -2   0   65.86    0.38   0
   6   5   1   68.95    0.48   0
   6  12   4   58.36    0.65   0
   6  15   6    5.99    0.74   0
   6  16   7   13.00    0.69   0
   6  17   8    1.73    0.69   0
   6  18   9    1.63    0.76   0
   6  19  10    4.94    0.97   0
   7  -8   1    4.54    0.21   0
   7   3   1   24.34    0.48   0
   7   7   2    9.92    0.56   0
   7   9   3    7.19    0.50   0
   7  11   4   10.69    0.57   0
   7  13   5    5.39    0.73   0
   7  14   6    2.74    0.64   0
   7  19  11    0.18    0.89   0
   8 -10   2   33.15    0.27   0
   8  -4   1  103.91    0.50   0
   8  -3   1   19.25    0.42   0
   8  -2   1   14.21    0.44   0
   8  -1   1   -0.15    0.45   0
   8   5   2    6.03    0.58   0
   8   8   3   41.46    0.71   0
   8  10   4   29.50    0.73   0
   8  12   5    7.87    0.78   0
   8  13   6    3.30    0.67   0
   9 -11   3    5.86    0.28   0
   9  -7   2   14.48    0.40   0
   9   1   2   50.29    0.63   0
   9   2   2   35.27    0.62   0
   9   6   3   10.93    0.69   0
   9   8   4    5.87    0.60   0
   9  10   5    3.91    0.65   0
   9  12   6   56.75    0.95   0
  10  -8   3    7.67    0.44   0
  10   2   3   10.15    0.64   0
  10   6   4    3.23    0.74   0
  10   8   5    6.56    0.67   0
  10  10   6   56.02    0.85   0
  10  12   7    6.15    0.95   0
  10  13   8    8.29    0.85   0
  10  16  11    3.67    1.06   0
  11  -8   4    8.51    0.52   0
  11   2   4   14.80    0.72   0
  11   6   5    4.95    0.82   0
  11   8   6    9.79    0.89   0
  11  10   7    2.50    1.00   0
  11  13   9    2.08    1.16   0
  11  14  10    1.18    1.21   0
  12 -11   6    0.17    0.50   0
  12  -7   5    7.40    0.60   0
  12  -6   5   13.55    0.59   0
  12   0   5   15.57    0.77   0
  12   1   5    0.90    0.77   0
  12   5   6    0.62    0.90   0
  12   7   7    7.56    0.83   0
  12   9   8    4.74    0.89   0
  12  11   9    1.39    1.20   0
  13 -10   7    2.77    0.65   0
  13  -4   6    8.42    0.79   0
  13  -3   6    9.11    0.87   0
  13  -2   6   19.36    0.81   0
  13  -1   6    8.85    0.89   0
  13   3   7    0.82    0.92   0
  13   4   7    8.68    0.96   0
  13   6   8    0.63    1.02   0
  13   8   9    5.86    1.15   0
  14   0   8    1.13    1.01   0
  14   1   8   -0.11    1.04   0
 -11 -10  16   -0.36    0.90   0
 -11  -9  16    0.52    1.00   0
 -11  -7  15    2.83    0.89   0
 -11  -6  15    0.34    0.89   0
 -11  -5  15    4.63    0.83   0
 -11  -1  15    3.43    0.68   0
 -11   0  15    2.67    0.70   0
 -11   1  15    0.25    0.64   0
 -11   3  16    0.47    0.61   0
 -10 -13  15    0.76    1.04   0
 -10 -12  14    2.40    0.84   0
 -10 -10  13    5.42    0.76   0
 -10  -9  13    2.83    0.82   0
 -10  -7  12    2.56    0.65   0
 -10  -6  12    4.32    0.74   0
 -10  -5  12    6.03    0.72   0
 -10  -1  12    2.52    0.57   0
 -10   0  12   16.88    0.60   0
 -10   7  15   14.50    0.55   0
 -10   8  16    3.50    0.55   0
 -10   9  17    2.16    0.55   0
  -9 -17  15   -0.23    1.00   0
  -9 -16  14   -0.27    0.91   0
  -9 -14  13    3.65    1.01   0
  -9 -13  12    8.38    0.79   0
  -9 -11  11    2.70    0.68   0
  -9 -10  11    4.32    0.76   0
  -9  -8  10   20.23    0.64   0
  -9  -7  10   11.55    0.71   0
  -9   2  10    7.27    0.44   0
  -9   5  11    0.26    0.39   0
  -8 -16  12    5.85    0.93   0
  -8 -13  10    5.10    0.67   0
  -8 -10   9    0.02    0.68   0
  -8  -7   8    1.28    0.57   0
  -8   2   8    6.15    0.36   0
  -8   5   9   21.21    0.39   0
  -8  13  15    3.35    0.30   0
  -7 -17  11    4.72    0.92   0
  -7 -16  10    8.63    0.73   0
  -7 -14   9    5.28    0.76   0
  -7 -12   8    0.36    0.66   0
  -7  -9   7    1.01    0.58   0
  -7  -5   6    8.31    0.40   0
  -7  -4   6   43.68    0.52   0
  -7  -3   6   20.77    0.45   0
  -7  -2   6   46.47    0.48   0
  -7  -1   6   18.85    0.42   0
  -7   0   6   14.06    0.38   0
  -7   7   8   19.56    0.28   0
  -6 -19  11    0.87    0.89   0
  -6 -18  10    1.41    0.85   0
  -6 -15   8    6.18    0.63   0
  -6 -13   7    5.79    0.66   0
  -6 -11   6    3.36    0.48   0
  -6  -7   5    4.66    0.39   0
  -6   2   5    3.95    0.30   0
  -6  17  14    0.26    0.27   0
  -5 -23  13    2.95    1.11   0
  -5 -22  12    2.28    1.07   0
  -5 -21  11    2.78    0.93   0
  -5 -20  10   -0.05    0.76   0
  -5 -17   8    3.52    0.75   0
  -5 -11   5    2.21    0.54   0
  -5  -8   4   84.78    0.52   0
  -4 -24  13   -0.10    1.11   0
  -4 -21  10    0.50    0.86   0
  -4 -20   9    0.23    0.83   0
  -4 -19   8    0.95    0.65   0
  -4 -17   7   -0.21    0.66   0
  -4 -11   4   10.23    0.51   0
  -4  20  15    1.21    0.53   0
  -3 -21   9   -0.16    0.78   0
  -3 -20   8   11.30    0.80   0
  -3 -17   6    2.65    0.65   0
  -3  -7   2   51.22    0.39   0
  -3  13   6   12.17    0.25   0
  -2 -25  12    1.66    0.99   0
  -2 -22   9   11.17    0.79   0
  -2 -21   8    0.18    0.73   0
  -2  -4   1   91.46    0.33   0
  -2   0   1  244.16    0.31   0
  -2   9   3   24.21    0.20   0
  -2  11   4   33.77    0.26   0
  -1 -25  11    0.24    0.95   0
  -1 -24  10    1.40    0.88   0
  -1 -23   9    1.17    0.79   0
  -1 -22   8   36.26    0.82   0
  -1 -19   6    1.91    0.58   0
  -1   8   2  317.86    0.45   0
   0   6   1    2.30    0.18   0
   0   9   2   37.67    0.29   0
   1 -25  10    0.57    0.80   0
   1 -24   9    0.24    0.73   0
   1   7   1   45.36    0.32   0
   1  20  10   14.43    0.71   0
   2 -22   7    3.13    0.59   0
   2   4   0  209.46    0.46   0
   2  10   2   86.37    0.45   0
   3   4   0  270.82    0.52   0
   3  10   2  174.96    0.61   0
   3  12   3   83.26    0.53   0
   4   4   0   32.65    0.39   0
   4  10   2    2.04    0.37   0
   4  20  10   12.77    0.89   0
   4  21  11    0.67    0.95   0
   5   3   0    8.02    0.38   0
   5  15   5    5.90    0.67   0
   5  16   6    9.53    0.73   0
   5  17   7   10.57    0.67   0
   5  18   8    1.33    0.69   0
   5  19   9    2.52    0.83   0
   5  20  10    1.02    0.95   0
   6  -4   0    7.95    0.25   0
   6  -1   0    1.63    0.30   0
   6   0   0    2.12    0.32   0
   6   1   0    2.67    0.34   0
   6   6   1   35.21    0.52   0
   6   9   2   25.04    0.60   0
   6  11   3   17.12    0.61   0
   6  13   4   15.27    0.69   0
   6  14   5   15.06    0.62   0
   6  20  11    0.75    0.91   0
   7   4   1  267.82    0.80   0
   7   8   2   51.37    0.65   0
   7  10   3    8.76    0.62   0
   7  12   4    2.18    0.71   0
   7  15   6    3.63    0.81   0
   7  16   7    8.79    0.84   0
   7  17   8   -0.21    0.76   0
   7  18   9    2.10    0.95   0
   7  19  10    0.07    1.10   0
   8  -5   1    8.61    0.33   0
   8   0   1   21.85    0.45   0
   8   1   1   17.38    0.47   0
   8   6   2  110.38    0.77   0
   8   9   3    1.02    0.66   0
   8  11   4    7.98    0.76   0
   8  14   6   12.16    0.86   0
   8  15   7    1.01    0.71   0
   8  16   8    9.87    0.79   0
   8  17   9    1.55    0.83   0
   8  18  10    8.38    0.95   0
   8  19  11    6.17    1.22   0
   9   3   2   33.45    0.66   0
   9   7   3   14.16    0.74   0
   9   9   4    1.35    0.61   0
   9  11   5    7.60    0.68   0
   9  13   6   14.12    0.90   0
   9  14   7   -0.34    0.91   0
   9  15   8    0.38    0.81   0
   9  16   9    0.88    0.88   0
   9  17  10    2.52    0.98   0
  10 -12   4   26.18    0.37   0
  10   3   3    0.17    0.53   0
  10   4   3   -1.11    0.69   0
  10   7   4    2.67    0.74   0
  10   9   5    4.07    0.67   0
  10  11   6   21.33    0.81   0
  10  13   7    4.46    0.95   0
  10  14   8    0.44    1.03   0
  10  15   9    4.03    0.93   0
  10  16  10    3.16    1.00   0
  11 -12   5    7.52    0.42   0
  11   3   4   42.97    0.69   0
  11   4   4    6.31    0.76   0
  11   7   5    8.04    0.85   0
  11   9   6    1.36    0.89   0
  11  11   7    2.63    1.04   0
  11  12   8    2.85    0.90   0
  12 -14   7    5.28    0.48   0
  12  -8   5    3.97    0.57   0
  12   2   5   13.11    0.67   0
  12   3   5    1.14    0.82   0
  12   6   6    7.12    0.88   0
  12   8   7   10.32    0.85   0
  12  10   8   20.06    0.99   0
  12  12   9    8.62    1.16   0
  13  -6   6    9.55    0.75   0
  13  -5   6    1.44    0.68   0
  13   0   6    0.12    0.83   0
  13   1   6    5.64    0.89   0
  13   2   6   21.21    0.94   0
  13   5   7    0.72    1.02   0
  13   7   8    2.40    0.94   0
  13   9   9    2.11    1.00   0
  14   2   8    5.23    1.02   0
  14   3   8    2.38    1.09   0
 -11  -8  16    1.92    0.84   0
 -11  -7  16    0.16    0.97   0
 -11  -4  15    2.69    0.68   0
 -11  -3  15   12.21    0.67   0
 -11  -2  15    3.64    0.61   0
 -11   1  16    6.38    0.79   0
 -11   2  16    6.73    0.68   0
 -11   4  17    0.15    0.68   0
 -10 -14  16    7.12    0.98   0
 -10 -12  15    1.64    1.00   0
 -10 -11  14    1.42    0.80   0
 -10 -10  14   33.60    1.01   0
 -10  -8  13    0.63    0.69   0
 -10  -7  13    2.31    0.76   0
 -10  -4  12   20.61    0.62   0
 -10  -3  12    6.62    0.55   0
 -10  -2  12    4.94    0.52   0
 -10   2  13    2.19    0.56   0
 -10   3  13    0.40    0.48   0
 -10   5  14    0.86    0.53   0
  -9 -16  15   -0.54    0.95   0
  -9 -15  14   -0.56    0.89   0
  -9 -13  13   -0.31    0.96   0
  -9 -12  12   27.62    0.82   0
  -9 -11  12    5.25    0.88   0
  -9  -9  11    0.96    0.73   0
  -9  -6  10    9.79    0.55   0
  -9  -5  10    5.78    0.64   0
  -9  -4  10   12.73    0.62   0
  -9  -3  10   20.14    0.58   0
  -9  -2  10    2.27    0.57   0
  -9  -1  10    3.39    0.57   0
  -9   0  10   63.36    0.62   0
  -9   1  10    0.26    0.46   0
  -9   4  11   12.93    0.47   0
  -9   8  13    7.30    0.39   0
  -9   9  14    2.58    0.42   0
  -9  12  17    1.16    0.39   0
  -8 -19  15    1.59    1.01   0
  -8 -18  14    6.47    0.95   0
  -8 -15  12    0.27    0.87   0
  -8 -14  11   14.06    0.75   0
  -8 -12  10    0.88    0.63   0
  -8  -9   9    2.13    0.67   0
  -8  -6   8    6.90    0.49   0
  -8  -5   8    5.06    0.55   0
  -8  -4   8   52.39    0.63   0
  -8  -3   8    9.71    0.50   0
  -8  -1   8    1.73    0.49   0
  -8   0   8   36.42    0.48   0
  -8   1   8    4.35    0.38   0
  -8   7  10    0.52    0.32   0
  -8  10  12    1.34    0.29   0
  -7 -20  14    6.56    0.99   0
  -7 -19  13    0.33    0.88   0
  -7 -18  12    0.20    0.80   0
  -7 -15  10    1.58    0.67   0
  -7 -13   9    4.80    0.76   0
  -7 -11   8    8.67    0.65   0
  -7  -8   7   31.66    0.61   0
  -7   4   7   99.91    0.42   0
  -6 -22  14    0.78    1.00   0
  -6 -21  13   -0.13    0.92   0
  -6 -20  12    0.33    0.83   0
  -6 -17  10    0.51    0.82   0
  -6 -16   9   36.58    0.75   0
  -6 -14   8    5.59    0.71   0
  -6 -12   7    4.28    0.64   0
  -6 -10   6    4.23    0.46   0
  -6  -6   5   56.17    0.47   0
  -6  -5   5    2.10    0.43   0
  -6   1   5   63.70    0.40   0
  -6   8   7    7.63    0.18   0
  -5 -19  10    0.54    0.86   0
  -5 -18   9    4.98    0.67   0
  -5 -15   7    1.47    0.54   0
  -5 -13   6    5.53    0.49   0
  -5 -10   5   20.07    0.56   0
  -5  -7   4    4.81    0.36   0
  -5  -6   4   32.62    0.47   0
  -5   3   4    3.77    0.21   0
  -4 -23  12   -0.66    0.84   0
  -4 -22  11    0.24    0.81   0
  -4 -18   8   24.50    0.80   0
  -4 -15   6   10.03    0.53   0
  -4 -13   5   14.55    0.48   0
  -4 -10   4  262.05    0.80   0
  -4  -7   3   52.10    0.42   0
  -4  -6   3   43.01    0.46   0
  -4   3   3    9.77    0.19   0
  -3 -24  12   14.51    0.89   0
  -3 -23  11    1.16    0.91   0
  -3 -22  10   10.81    0.86   0
  -3 -18   7    6.57    0.71   0
  -3 -15   5   14.50    0.50   0
  -3 -10   3   40.48    0.42   0
  -3  -6   2  121.31    0.44   0
  -2 -24  11    3.26    0.82   0
  -2 -23  10    9.62    0.87   0
  -2 -19   7    2.40    0.66   0
  -2 -18   6   10.17    0.53   0
  -2 -16   5   28.15    0.61   0
  -2 -12   3   15.65    0.45   0
  -2  -3   1    5.82    0.21   0
  -2  -2   1   41.04    0.27   0
  -2  -1   1    0.66    0.20   0
  -1  -7   1   95.24    0.38   0
   0 -25  11   -0.75    0.92   0
   0 -24  10    8.29    0.81   0
   0  16   6    2.77    0.41   0
   0  19   9    0.33    0.54   0
   1   3   0    9.47    0.17   0
   1  21  11    0.50    0.70   0
   3 -25  10   -0.38    0.70   0
   3   8   1    5.92    0.34   0
   4   8   1   15.24    0.38   0
   4  14   4   62.10    0.61   0
   4  22  12    3.24    1.03   0
   5  -7   0   42.69    0.15   0
   5   4   0  226.23    0.64   0
   5  10   2   47.39    0.51   0
   5  12   3   18.78    0.50   0
   5  14   4    3.12    0.65   0
   5  21  11   -0.34    0.94   0
   6  -5   0   15.63    0.24   0
   6   2   0   80.48    0.48   0
   6   7   1   10.88    0.50   0
   6  15   5    9.08    0.73   0
   6  16   6   18.30    0.69   0
   6  17   7    9.11    0.71   0
   6  18   8   16.00    0.80   0
   6  19   9   12.12    0.80   0
   6  20  10    1.91    1.00   0
   7   5   1   10.36    0.43   0
   7  11   3    8.01    0.66   0
   7  14   5   38.22    0.74   0
   7  20  11    3.00    0.97   0
   8  -6   1    7.61    0.32   0
   8   2   1   64.83    0.56   0
   8   3   1   12.45    0.51   0
   8   7   2    1.05    0.60   0
   8  13   5    2.39    0.65   0
   8  16   7    2.35    0.92   0
   8  17   8    0.21    1.00   0
   8  18   9    3.66    1.09   0
   8  19  10    0.59    1.12   0
   9  -8   2   48.53    0.42   0
   9   4   2  143.74    0.77   0
   9   8   3   32.13    0.77   0
   9  10   4   53.48    0.88   0
   9  12   5    5.03    0.84   0
   9  15   7    3.51    0.92   0
   9  16   8   -0.23    1.00   0
   9  17   9    1.88    1.12   0
   9  18  10   -1.27    1.21   0
  10  -9   3   16.19    0.41   0
  10  -2   2    9.39    0.57   0
  10  -1   2    3.27    0.57   0
  10   5   3   11.36    0.73   0
  10   8   4   42.13    0.86   0
  10  10   5    0.58    0.68   0
  10  12   6   12.68    0.93   0
  10  15   8    2.45    1.04   0
  10  16   9    2.07    1.10   0
  11  -9   4    3.06    0.46   0
  11  -4   3   11.99    0.60   0
  11  -3   3    4.17    0.61   0
  11  -2   3   18.28    0.60   0
  11  -1   3    7.72    0.60   0
  11   0   3    6.29    0.65   0
  11   5   4    0.10    0.76   0
  11   8   5    4.63    0.88   0
  11  10   6    1.86    0.93   0
  11  12   7   11.68    1.04   0
  11  13   8    1.38    0.90   0
  11  14   9   11.82    1.02   0
  12 -12   6   12.70    0.53   0
  12  -9   5    3.63    0.58   0
  12  -3   4    4.88    0.71   0
  12  -2   4   21.85    0.77   0
  12  -1   4    9.85    0.76   0
  12   4   5   23.61    0.75   0
  12   5   5    6.22    0.86   0
  12   7   6    7.66    0.79   0
  12   9   7    1.01    0.86   0
  12  11   8   -0.85    0.95   0
  13 -11   7    7.82    0.64   0
  13  -8   6    2.17    0.70   0
  13  -7   6    1.45    0.62   0
  13   3   6   -0.56    0.94   0
  13   4   6    5.06    0.92   0
  13   6   7    3.37    0.89   0
  13   8   8   12.32    0.99   0
  13   9   8    0.79    1.13   0
  14  -5   7    0.10    0.90   0
  14  -4   7    3.79    0.85   0
  14  -3   7    0.13    0.87   0
  14  -2   7    1.35    0.91   0
  14  -1   7    2.72    0.95   0
  14   0   7    4.81    1.00   0
  14   1   7    2.19    0.95   0
  14   4   8    5.54    0.93   0
 -11  -8  17    3.07    1.07   0
 -11  -7  17    1.37    1.01   0
 -11  -6  16    3.83    0.79   0
 -11  -5  16    0.00    0.87   0
 -11  -4  16    1.29    0.84   0
 -11  -3  16    0.10    0.82   0
 -11  -1  16    1.42    0.76   0
 -11   0  16    9.18    0.74   0
 -11   2  17    0.86    0.80   0
 -11   3  17    0.23    0.72   0
 -10 -13  16    0.79    0.90   0
 -10 -12  16    0.20    1.08   0
 -10 -11  15    2.63    0.94   0
 -10 -10  15    3.21    0.96   0
 -10  -9  14    0.85    0.84   0
 -10  -8  14    0.97    0.83   0
 -10  -6  13    4.30    0.73   0
 -10  -5  13    0.18    0.74   0
 -10  -4  13    5.49    0.73   0
 -10  -3  13    1.57    0.75   0
 -10  -2  13   11.47    0.74   0
 -10  -1  13    8.20    0.71   0
 -10   1  13    0.10    0.60   0
 -10   4  14    5.38    0.57   0
 -10   6  15    4.34    0.52   0
 -10   7  16    0.94    0.58   0
 -10   8  17    2.10    0.61   0
  -9 -16  16    5.88    1.19   0
  -9 -15  15    4.31    1.07   0
  -9 -14  14    0.36    0.84   0
  -9 -12  13    6.90    0.96   0
  -9 -10  12   68.34    0.98   0
  -9  -8  11    2.22    0.62   0
  -9  -7  11    2.81    0.70   0
  -9   3  11    6.88    0.49   0
  -9  10  15    1.40    0.41   0
  -9  11  16    0.99    0.40   0
  -8 -18  15    0.95    0.94   0
  -8 -17  14   -1.23    0.87   0
  -8 -16  13   -0.65    0.80   0
  -8 -14  12    1.92    0.89   0
  -8 -13  11    1.80    0.67   0
  -8 -11  10    9.40    0.63   0
  -8 -10  10   18.09    0.72   0
  -8  -8   9   28.69    0.69   0
  -8  -7   9    7.54    0.61   0
  -8  -2   8    2.24    0.45   0
  -8   4   9    8.09    0.39   0
  -8  11  13    6.88    0.31   0
  -8  12  14    1.99    0.31   0
  -7 -20  15   -0.59    1.19   0
  -7 -19  14   -0.21    1.07   0
  -7 -18  13    1.32    0.97   0
  -7 -17  12    2.20    0.90   0
  -7 -16  11   11.94    0.75   0
  -7 -14  10    3.38    0.79   0
  -7 -12   9   14.95    0.73   0
  -7 -10   8    2.02    0.61   0
  -7  -7   7    7.20    0.46   0
  -7  -6   7   68.72    0.64   0
  -7   3   7   42.10    0.39   0
  -7  10  10   43.63    0.28   0
  -6 -21  14    0.90    1.15   0
  -6 -20  13    0.22    1.05   0
  -6 -19  12   -0.35    0.95   0
  -6 -18  11    3.03    0.74   0
  -6 -15   9   14.20    0.80   0
  -6 -13   8    8.72    0.68   0
  -6 -11   7    9.49    0.60   0
  -6  -9   6   11.08    0.46   0
  -6  -8   6   87.71    0.65   0
  -6  -4   5    4.33    0.34   0
  -6  -3   5    4.38    0.39   0
  -6  -2   5    3.21    0.38   0
  -6  -1   5  163.20    0.54   0
  -6   0   5   48.70    0.38   0
  -6   5   6    4.98    0.26   0
  -5 -22  13    4.29    0.92   0
  -5 -21  12    0.41    0.85   0
  -5 -20  11   -0.32    0.75   0
  -5 -17   9    1.35    0.77   0
  -5 -16   8   23.45    0.64   0
  -5 -14   7    4.58    0.67   0
  -5 -12   6    6.64    0.57   0
  -5  -9   5    2.00    0.48   0
  -5  -5   4   20.01    0.43   0
  -5   2   4   54.57    0.31   0
  -4 -23  13    7.49    1.12   0
  -4 -22  12   29.89    1.03   0
  -4 -21  11   -0.42    0.93   0
  -4 -20  10   24.14    0.93   0
  -4 -19   9    2.38    0.64   0
  -4 -16   7   15.84    0.70   0
  -4 -14   6   22.39    0.61   0
  -4 -12   5   28.62    0.59   0
  -4  -5   3    4.21    0.40   0
  -3 -24  13   -0.85    1.07   0
  -3 -20   9   14.85    0.80   0
  -3 -19   8   -0.51    0.73   0
  -3 -14   5   98.09    0.72   0
  -3 -12   4   73.03    0.58   0
  -3  -9   3   25.70    0.45   0
  -3  -5   2  151.01    0.45   0
  -3  -4   2    4.68    0.30   0
  -3   2   2   68.85    0.20   0
  -3  16   8    3.80    0.35   0
  -3  18  10    3.73    0.43   0
  -2 -25  13    6.30    1.11   0
  -2 -20   8    9.53    0.79   0
  -2  17   8   12.07    0.42   0
  -2  18   9    0.87    0.46   0
  -1 -25  12    0.61    0.98   0
  -1 -24  11    0.91    0.92   0
  -1 -23  10    4.65    0.80   0
   0  15   5    4.77    0.39   0
   0  21  11   10.01    0.67   0
   1 -21   7    1.77    0.57   0
   1  -5   0   84.04    0.21   0
   1   8   1   90.20    0.39   0
   1  18   7    1.44    0.54   0
   1  19   8    0.74    0.58   0
   1  22  12    4.96    0.79   0
   2 -17   4    3.18    0.37   0
   2   5   0  150.44    0.43   0
   2  11   2    4.10    0.41   0
   2  17   6    3.22    0.48   0
   3   5   0   89.52    0.39   0
   3   9   1  230.34    0.67   0
   3  11   2   10.23    0.37   0
   3  13   3    0.61    0.40   0
   4   5   0  140.73    0.49   0
   4   9   1  205.07    0.70   0
   4  11   2    8.05    0.41   0
   4  13   3    1.57    0.45   0
   4  20   9   -0.71    0.71   0
   4  21  10    5.73    0.94   0
   5   5   0   15.65    0.42   0
   5   8   1    7.55    0.39   0
   5  11   2   65.71    0.65   0
   5  13   3    8.66    0.59   0
   5  16   5   29.51    0.78   0
   5  17   6    1.03    0.76   0
   5  18   7    8.23    0.70   0
   5  19   8    5.13    0.69   0
   5  20   9   -0.07    0.92   0
   5  21  10    5.34    0.95   0
   6   3   0   19.08    0.41   0
   6  10   2   10.33    0.49   0
   6  12   3    1.77    0.52   0
   6  14   4   40.19    0.78   0
   6  18   7    7.38    0.85   0
   6  19   8    0.10    0.89   0
   6  21  11   -0.47    0.89   0
   7  -9   1    5.02    0.18   0
   7  -2   0   19.21    0.38   0
   7  -1   0   13.88    0.35   0
   7   0   0    3.40    0.35   0
   7   6   1   68.60    0.55   0
   7   9   2   16.24    0.53   0
   7  13   4    8.46    0.61   0
   7  15   5   11.74    0.79   0
   7  16   6    8.93    0.81   0
   7  17   7    9.85    0.77   0
   7  18   8    1.11    0.81   0
   7  19   9    2.24    0.83   0
   7  20  10    4.78    1.13   0
   8  -7   1  119.07    0.45   0
   8   4   1   21.45    0.55   0
   8   8   2    3.38    0.63   0
   8  10   3    2.97    0.58   0
   8  12   4   48.99    0.74   0
   8  14   5    8.79    0.84   0
   8  15   6    6.68    0.73   0
   9   5   2   28.85    0.58   0
   9   6   2   14.13    0.66   0
   9   9   3    4.14    0.70   0
   9  13   5    4.11    0.85   0
   9  14   6    0.74    0.76   0
  10  -5   2    5.54    0.46   0
  10  -4   2   20.83    0.51   0
  10  -3   2    8.16    0.47   0
  10   0   2    0.55    0.54   0
  10   1   2    6.06    0.58   0
  10   2   2   91.65    0.78   0
  10   6   3   17.89    0.65   0
  10   9   4    2.54    0.78   0
  10  11   5    3.46    0.72   0
  10  13   6    9.09    0.98   0
  10  14   7   12.12    0.87   0
  11 -10   4    7.90    0.46   0
  11  -5   3    4.02    0.55   0
  11   1   3    1.42    0.65   0
  11   2   3    4.55    0.70   0
  11   3   3    2.23    0.68   0
  11   6   4   15.12    0.69   0
  11   7   4    2.97    0.80   0
  11   9   5   13.28    0.93   0
  11  11   6    3.52    0.97   0
  11  14   8    6.94    1.20   0
  11  15   9    0.56    1.02   0
  12  -5   4    7.96    0.65   0
  12  -4   4    1.79    0.58   0
  12   0   4    1.20    0.70   0
  12   1   4    7.18    0.76   0
  12   2   4    0.65    0.79   0
  12   6   5   14.24    0.93   0
  12   8   6   15.83    0.87   0
  12   9   6    1.70    0.98   0
  12  10   7    3.33    0.90   0
  12  12   8   -0.18    1.15   0
  13  -9   6    3.95    0.68   0
  13  -4   5    7.38    0.78   0
  13  -3   5    3.75    0.80   0
  13  -2   5    2.92    0.77   0
  13  -1   5    0.80    0.79   0
  13   0   5    1.05    0.79   0
  13   5   6    2.40    1.01   0
  13   7   7    1.67    0.92   0
  13   8   7    1.60    1.06   0
  14  -6   7    4.57    0.78   0
  14   2   7    3.73    0.99   0
  14   3   7    2.95    1.06   0
 -11  -6  17    3.33    0.99   0
 -11  -5  17    3.97    0.94   0
 -11  -4  17    1.54    0.90   0
 -11  -3  17    6.69    0.98   0
 -11  -2  17    4.47    0.96   0
 -11  -1  17    5.55    0.92   0
 -11   0  17    3.32    0.86   0
 -11   1  17    4.35    0.76   0
 -10 -12  17    0.30    1.08   0
 -10 -11  16    0.29    1.05   0
 -10  -9  15    6.33    0.94   0
 -10  -7  14    0.70    0.84   0
 -10  -6  14   23.21    0.87   0
 -10   2  14    9.61    0.62   0
 -10   3  14    1.55    0.60   0
 -10   5  15    4.45    0.61   0
  -9 -15  16   -0.05    1.14   0
  -9 -14  15    1.29    1.04   0
  -9 -13  14    0.08    0.82   0
  -9 -12  14   31.97    1.01   0
  -9 -11  13    2.53    0.89   0
  -9  -9  12    9.98    0.80   0
  -9  -8  12    6.65    0.76   0
  -9  -6  11    2.92    0.67   0
  -9  -5  11   11.31    0.66   0
  -9  -4  11    7.69    0.68   0
  -9   1  11    7.83    0.55   0
  -9   2  11    1.66    0.51   0
  -9   5  12    6.13    0.49   0
  -9   7  13    1.84    0.43   0
  -8 -18  16    0.21    1.20   0
  -8 -17  15    1.55    1.09   0
  -8 -16  14    2.81    0.99   0
  -8 -15  13    0.40    0.81   0
  -8 -13  12    8.97    0.86   0
  -8 -12  11    0.95    0.65   0
  -8 -11  11    2.06    0.72   0
  -8  -9  10    2.86    0.68   0
  -8  -6   9    9.51    0.59   0
  -8   3   9    7.35    0.41   0
  -8   6  10   27.52    0.40   0
  -8   8  11    8.96    0.35   0
  -7 -17  13    1.30    0.93   0
  -7 -16  12   27.00    0.99   0
  -7 -15  11    2.12    0.70   0
  -7 -13  10    1.94    0.77   0
  -7 -11   9   10.00    0.69   0
  -7  -9   8    4.81    0.60   0
  -7  -5   7    2.12    0.48   0
  -7  -4   7    3.65    0.44   0
  -7   2   7   78.44    0.48   0
  -7   6   8    8.02    0.29   0
  -7   8   9   20.97    0.30   0
  -6 -21  15    1.03    1.14   0
  -6 -17  11    1.59    0.87   0
  -6 -14   9   26.34    0.75   0
  -6 -10   7   70.25    0.70   0
  -6  -7   6    2.51    0.49   0
  -5 -22  14    4.39    1.16   0
  -5 -21  13    0.22    1.05   0
  -5 -20  12   13.97    1.00   0
  -5 -19  11    3.42    0.90   0
  -5 -18  10   19.89    0.86   0
  -5 -15   8    6.21    0.69   0
  -5 -13   7   54.15    0.70   0
  -5 -11   6   24.27    0.60   0
  -5  -8   5   17.71    0.47   0
  -5  -4   4  133.55    0.50   0
  -5  -3   4    3.95    0.37   0
  -5  -2   4   86.99    0.44   0
  -5   0   4  181.21    0.50   0
  -5   1   4   39.17    0.33   0
  -4 -17   8    0.46    0.67   0
  -4  -9   4   39.69    0.43   0
  -4  -4   3  161.44    0.53   0
  -4   2   3    7.15    0.20   0
  -3 -23  12    1.22    0.82   0
  -3 -22  11    4.46    0.86   0
  -3 -21  10    1.37    0.70   0
  -3 -17   7    0.57    0.66   0
  -3  -3   2  142.06    0.42   0
  -3  12   5   83.91    0.29   0
  -3  15   7   51.84    0.37   0
  -2 -24  12    1.08    0.83   0
  -2 -23  11   -0.23    0.87   0
  -2 -22  10    0.82    0.80   0
  -2 -21   9    2.53    0.62   0
  -2 -17   6    1.76    0.49   0
  -2 -13   4   17.64    0.47   0
  -2 -11   3  122.07    0.52   0
  -1 -10   2    9.90    0.30   0
  -1  -6   1  342.08    0.54   0
  -1   5   1  525.53    0.37   0
  -1  17   7   46.58    0.48   0
  -1  19   9   22.77    0.52   0
   0 -25  12    0.63    0.89   0
   0   7   1  207.47    0.39   0
   0  10   2  444.21    0.66   0
   1   4   0    6.94    0.20   0
   1  16   5   16.17    0.51   0
   1  21  10    2.73    0.69   0
   3 -13   2   38.46    0.29   0
   3   6   0    1.96    0.35   0
   3  15   4    2.95    0.45   0
   3  22  11    1.69    0.86   0
   3  23  12    2.74    0.96   0
   4  15   4    2.63    0.51   0
   4  19   7    2.77    0.72   0
   4  20   8    0.43    0.77   0
   4  22  11    0.71    0.81   0
   5 -21   7    0.57    0.45   0
   5   9   1   15.19    0.41   0
   5  22  11    1.31    1.09   0
   6  -6   0  258.49    0.40   0
   6   4   0    5.46    0.35   0
   6   8   1   19.59    0.45   0
   6  11   2    6.94    0.60   0
   6  13   3   -0.34    0.67   0
   6  16   5    4.69    0.77   0
   6  17   6    5.94    0.68   0
   6  20   9    2.79    0.83   0
   6  21  10    0.89    1.11   0
   7  -4   0   30.77    0.33   0
   7  -3   0    2.63    0.28   0
   7   1   0   11.81    0.38   0
   7   2   0   25.92    0.44   0
   7   7   1    2.80    0.45   0
   7  10   2   40.18    0.67   0
   7  12   3   20.36    0.63   0
   7  14   4    6.75    0.79   0
   7  18   7    3.06    0.90   0
   7  19   8    0.13    0.94   0
   8   5   1    0.49    0.46   0
   8   9   2    5.36    0.68   0
   8  11   3   12.31    0.61   0
   8  13   4    5.58    0.80   0
   8  16   6    1.78    0.91   0
   8  17   7    8.42    0.83   0
   8  18   8    1.03    0.84   0
   8  19   9    4.03    1.09   0
   9 -12   3   21.15    0.23   0
   9  -9   2   21.51    0.36   0
   9  -4   1   31.77    0.46   0
   9  -3   1    8.62    0.41   0
   9  -2   1   23.93    0.46   0
   9  -1   1    4.47    0.45   0
   9   0   1   50.96    0.57   0
   9   1   1    7.42    0.52   0
   9   2   1    8.60    0.54   0
   9   7   2   21.95    0.73   0
   9  10   3    9.85    0.75   0
   9  12   4    9.03    0.80   0
   9  15   6    0.59    0.95   0
   9  16   7    0.79    0.82   0
   9  17   8    0.81    0.89   0
   9  18   9   -0.90    0.99   0
  10 -10   3   16.97    0.39   0
  10  -6   2   27.03    0.49   0
  10   3   2   14.52    0.65   0
  10   4   2   11.42    0.69   0
  10   7   3   11.74    0.65   0
  10   8   3    4.90    0.76   0
  10  10   4   33.53    0.87   0
  10  12   5    4.01    0.93   0
  10  15   7    2.26    1.06   0
  10  16   8   18.86    0.98   0
  10  17   9    0.51    1.03   0
  11 -13   5    4.00    0.36   0
  11  -7   3   36.95    0.58   0
  11  -6   3   12.10    0.53   0
  11   4   3    7.80    0.75   0
  11   8   4    6.21    0.85   0
  11  10   5    5.37    0.92   0
  11  12   6   26.10    1.11   0
  11  13   7    4.36    0.92   0
  11  15   8    0.06    1.14   0
  12 -10   5    8.48    0.54   0
  12  -7   4    6.25    0.63   0
  12  -6   4    7.86    0.60   0
  12   3   4    0.88    0.76   0
  12   4   4   11.57    0.84   0
  12   7   5    9.63    0.77   0
  12  10   6    8.48    1.03   0
  12  11   7    0.85    0.92   0
  13  -6   5    1.55    0.69   0
  13  -5   5    0.84    0.73   0
  13   1   5    1.98    0.82   0
  13   2   5    3.66    0.90   0
  13   3   5    1.09    0.91   0
  13   6   6   10.28    0.86   0
  13   7   6   12.31    1.04   0
  13   9   7    0.22    1.15   0
  14  -3   6    1.37    0.93   0
  14  -2   6    0.98    0.97   0
  14  -1   6   10.90    1.03   0
  14   0   6    7.90    1.02   0
  14   4   7    0.63    0.91   0
  14   5   7    0.13    1.13   0
 -11   1  18    3.67    0.85   0
 -11   2  18    4.49    0.83   0
 -10 -11  17    4.22    1.10   0
 -10 -10  16    0.72    0.94   0
 -10  -8  15    2.80    0.89   0
 -10  -7  15    2.11    0.82   0
 -10  -5  14    0.66    0.74   0
 -10  -4  14    0.05    0.71   0
 -10  -3  14    2.37    0.74   0
 -10  -2  14   20.38    0.80   0
 -10  -1  14    1.83    0.72   0
 -10   0  14   15.96    0.69   0
 -10   1  14    1.15    0.62   0
 -10   4  15    0.99    0.57   0
 -10   6  16    5.90    0.60   0
  -9 -15  17   -0.77    1.14   0
  -9 -14  16    0.69    1.10   0
  -9 -13  15    1.52    1.01   0
  -9 -10  13    5.86    0.85   0
  -9  -7  12   11.14    0.75   0
  -9  -3  11   20.52    0.62   0
  -9  -2  11   27.56    0.59   0
  -9  -1  11    9.26    0.54   0
  -9   0  11    8.37    0.52   0
  -9   4  12   11.23    0.52   0
  -9   8  14   16.69    0.49   0
  -8 -17  16    2.74    1.10   0
  -8 -16  15    0.17    1.00   0
  -8 -15  14    0.49    0.96   0
  -8 -14  13    3.02    0.75   0
  -8 -12  12   56.65    0.93   0
  -8  -8  10    3.60    0.65   0
  -8  -5   9   16.12    0.50   0
  -8  -4   9    5.47    0.54   0
  -8  -3   9    5.94    0.50   0
  -8   1   9   22.85    0.48   0
  -8   2   9   34.66    0.47   0
  -7 -19  15    0.34    0.91   0
  -7 -18  14    1.90    0.89   0
  -7 -14  11   15.51    0.83   0
  -7 -12  10   18.43    0.76   0
  -7 -10   9   11.02    0.65   0
  -7  -8   8   49.04    0.57   0
  -7  -3   7    5.41    0.44   0
  -7  -2   7   96.44    0.57   0
  -7  -1   7   22.25    0.43   0
  -7   0   7   32.63    0.42   0
  -7   1   7    5.02    0.35   0
  -6 -20  14    0.68    0.91   0
  -6 -19  13    2.30    0.84   0
  -6 -15  10    8.09    0.79   0
  -6 -12   8    2.06    0.54   0
  -6  -6   6  153.43    0.68   0
  -5 -22  15    4.22    1.15   0
  -5 -17  10    0.57    0.75   0
  -5 -16   9    6.63    0.72   0
  -5  -1   4    5.77    0.31   0
  -4 -23  14   -0.15    0.92   0
  -4 -22  13    2.62    1.01   0
  -4 -21  12    0.43    0.96   0
  -4 -20  11    1.63    0.90   0
  -4 -19  10    0.01    0.77   0
  -4 -18   9    0.09    0.63   0
  -4 -15   7   15.03    0.56   0
  -4 -13   6    4.86    0.56   0
  -4 -11   5    2.21    0.41   0
  -4  -8   4   12.21    0.43   0
  -4  -3   3    6.69    0.27   0
  -4  -2   3   66.57    0.36   0
  -4   1   3   10.53    0.24   0
  -3 -24  14    3.65    1.11   0
  -3 -23  13    2.45    0.98   0
  -3 -19   9    0.40    0.75   0
  -3 -18   8    0.38    0.67   0
  -3 -13   5    2.74    0.51   0
  -3  -2   2   60.69    0.31   0
  -3  -1   2   11.20    0.24   0
  -3   0   2   57.21    0.25   0
  -3   1   2   44.66    0.20   0
  -2 -24  13    0.35    0.99   0
  -2 -18   7    1.94    0.53   0
  -2  -7   2   15.80    0.35   0
  -1 -25  13    5.32    1.01   0
  -1 -24  12    4.89    0.96   0
  -1 -23  11    1.01    0.81   0
  -1 -19   7    2.15    0.52   0
  -1   9   2  130.37    0.35   0
   0  17   6    6.99    0.46   0
   0  20   9   -0.68    0.57   0
   2 -18   5   15.32    0.45   0
   2  -6   0   23.92    0.13   0
   2   6   0   22.69    0.32   0
   2  14   3  124.31    0.64   0
   3 -25  11    1.57    0.75   0
   3 -22   8    2.46    0.56   0
   3  10   1   44.54    0.50   0
   3  12   2    4.75    0.38   0
   3  18   6   10.39    0.56   0
   4 -22   8    1.95    0.58   0
   4  10   1    5.01    0.47   0
   4  14   3    5.53    0.48   0
   4  18   6    4.18    0.61   0
   4  21   9    1.52    0.85   0
   4  22  10    1.17    0.96   0
   5 -23   9   -0.03    0.57   0
   5   6   0   79.90    0.47   0
   5  10   1   42.66    0.57   0
   5  12   2   22.54    0.51   0
   5  14   3   10.49    0.63   0
   5  17   5    6.05    0.75   0
   5  18   6   83.48    0.86   0
   5  19   7    0.77    0.68   0
   5  20   8   23.24    0.80   0
   5  21   9    0.76    0.96   0
   5  22  10    1.20    0.99   0
   6   5   0   18.09    0.39   0
   6  15   4   14.76    0.62   0
   6  18   6    0.78    0.80   0
   6  19   7    1.36    0.92   0
   6  20   8    3.03    0.95   0
   7   3   0    4.27    0.35   0
   7   4   0   25.43    0.48   0
   7   8   1   57.18    0.58   0
   7  11   2   10.58    0.66   0
   7  13   3   11.62    0.74   0
   7  16   5   18.08    0.83   0
   7  17   6    1.68    0.74   0
   7  20   9    2.63    0.90   0
   8 -11   2    0.82    0.17   0
   8   6   1   80.22    0.64   0
   8  10   2   44.24    0.76   0
   8  12   3   10.57    0.77   0
   8  14   4    3.87    0.80   0
   8  15   5    1.29    0.72   0
   8  18   7    1.90    0.98   0
   8  19   8   -1.07    1.05   0
   9  -5   1   33.08    0.44   0
   9   3   1   51.05    0.65   0
   9   4   1    4.93    0.60   0
   9   8   2   43.92    0.80   0
   9  14   5    6.13    0.76   0
   9  17   7    2.09    1.05   0
   9  18   8   11.73    1.20   0
  10   5   2    2.68    0.70   0
  10   9   3    8.81    0.79   0
  10  11   4   14.39    0.88   0
  10  13   5    3.07    0.96   0
  10  16   7    4.25    1.06   0
  10  17   8   -1.21    1.19   0
  11   5   3   14.07    0.64   0
  11   6   3    8.04    0.81   0
  11   9   4    7.71    0.90   0
  11  11   5    0.58    0.94   0
  11  13   6    1.25    1.07   0
  11  14   7    7.81    0.94   0
  12 -15   7    0.64    0.36   0
  12 -13   6    0.24    0.43   0
  12   5   4    1.78    0.81   0
  12   6   4    7.64    0.86   0
  12   8   5    0.27    0.80   0
  12   9   5    1.25    0.96   0
  12  11   6    0.42    1.09   0
  12  12   7    5.82    1.00   0
  13 -10   6   11.81    0.65   0
  13  -7   5    5.23    0.71   0
  13   4   5   11.18    0.91   0
  13   5   5    0.66    0.96   0
  13   8   6    1.43    1.11   0
  13  10   7    4.34    1.19   0
  14  -5   6    0.22    0.87   0
  14  -4   6    4.55    0.81   0
  14   1   6    0.98    0.93   0
  14   2   6   -0.28    1.00   0
  14   3   6    1.71    1.02   0
 -11  -4  18    1.92    0.94   0
 -11  -3  18    0.33    0.90   0
 -11  -2  18    0.20    0.84   0
 -11  -1  18    1.96    0.83   0
 -11   0  18    5.53    0.82   0
 -10 -10  17    6.99    1.09   0
 -10  -9  16    2.12    0.80   0
 -10  -8  16   11.94    0.92   0
 -10  -6  15    0.83    0.83   0
 -10   3  15    0.56    0.60   0
 -10   7  17    2.26    0.60   0
  -9 -13  16    1.28    0.99   0
  -9 -12  15    1.01    0.97   0
  -9 -11  14   12.96    0.79   0
  -9 -10  14    7.50    0.86   0
  -9  -9  13    0.11    0.64   0
  -9  -8  13    4.55    0.75   0
  -9  -6  12   31.54    0.76   0
  -9  -5  12   15.48    0.67   0
  -9   3  12    6.37    0.52   0
  -9   6  13    2.89    0.46   0
  -8 -14  14    1.71    0.88   0
  -8 -13  13   -0.70    0.83   0
  -8 -11  12    5.70    0.77   0
  -8 -10  11    7.90    0.62   0
  -8  -9  11   -0.40    0.67   0
  -8  -7  10    5.22    0.65   0
  -8  -2   9   15.06    0.51   0
  -8  -1   9    6.72    0.48   0
  -8   0   9   29.31    0.48   0
  -8   5  10   41.48    0.43   0
  -7 -19  16    0.98    1.09   0
  -7 -18  15    2.41    1.05   0
  -7 -17  14    1.14    0.97   0
  -7 -16  13    7.39    0.90   0
  -7 -15  12    5.30    0.76   0
  -7 -13  11    2.70    0.78   0
  -7  -7   8   11.65    0.48   0
  -7   5   8   12.84    0.32   0
  -6 -21  16    2.27    1.05   0
  -6 -20  15    2.48    1.12   0
  -6 -19  14   -1.52    1.00   0
  -6 -18  13    1.76    0.93   0
  -6 -17  12    1.54    0.90   0
  -6 -16  11   14.84    0.70   0
  -6 -13   9   10.56    0.59   0
  -6 -11   8   -0.51    0.60   0
  -6  -9   7   14.80    0.48   0
  -6  -5   6   11.61    0.45   0
  -6   4   6   38.87    0.29   0
  -5 -21  14    1.18    0.91   0
  -5 -20  13    0.46    0.96   0
  -5 -19  12    1.19    0.89   0
  -5 -18  11   -0.71    0.67   0
  -5 -14   8   10.13    0.57   0
  -5 -12   7   26.07    0.52   0
  -5 -10   6  166.92    0.72   0
  -5  -7   5    4.08    0.36   0
  -4 -23  15    4.25    1.16   0
  -4 -17   9    7.04    0.72   0
  -4 -16   8   17.80    0.60   0
  -4 -14   7   20.35    0.63   0
  -4 -10   5   76.65    0.58   0
  -4  -7   4   30.18    0.46   0
  -4  -1   3    4.41    0.21   0
  -4   0   3   18.08    0.24   0
  -3 -22  12    2.22    0.76   0
  -3 -21  11    7.23    0.73   0
  -3 -20  10    4.05    0.69   0
  -3 -16   7   23.38    0.63   0
  -2 -23  12    3.93    0.79   0
  -2 -22  11    0.77    0.82   0
  -2 -21  10   -0.05    0.74   0
  -2 -20   9    6.20    0.62   0
  -2 -16   6   12.08    0.48   0
  -2 -10   3    6.96    0.33   0
  -2  10   3   12.50    0.21   0
  -1  -9   2    4.48    0.27   0
  -1  -5   1  173.57    0.37   0
   0 -25  13   -0.53    0.95   0
   0  16   5    5.29    0.40   0
   1   5   0   66.76    0.31   0
   1  18   6    6.99    0.53   0
   2  10   1   14.25    0.40   0
   3 -10   1    1.50    0.17   0
   3   7   0   47.57    0.37   0
   3  13   2   22.58    0.50   0
   3  23  11   -0.84    0.95   0
   4 -18   5    1.55    0.37   0
   4  16   4    6.98    0.55   0
   4  20   7    8.53    0.77   0
   5   7   0   34.27    0.42   0
   5  13   2   15.69    0.60   0
   6   6   0  196.03    0.66   0
   6  12   2   65.47    0.64   0
   6  14   3   19.84    0.61   0
   6  16   4    1.63    0.72   0
   6  17   5    4.93    0.66   0
   6  21   9    0.75    0.87   0
   7 -23  10    0.65    0.57   0
   7  -5   0   22.12    0.28   0
   7   5   0   32.12    0.52   0
   7   9   1   52.91    0.67   0
   7  15   4   10.24    0.67   0
   7  18   6    9.43    0.96   0
   7  19   7    9.12    1.02   0
   7  20   8    1.17    1.06   0
   7  21   9    0.63    1.13   0
   8  -8   1    1.85    0.27   0
   8  -2   0   65.66    0.50   0
   8  -1   0   18.63    0.41   0
   8   0   0  159.84    0.64   0
   8   1   0   23.75    0.46   0
   8   2   0   93.39    0.59   0
   8   7   1   19.21    0.53   0
   8   8   1   13.86    0.63   0
   8  13   3   17.12    0.79   0
   8  16   5   15.34    0.93   0
   8  17   6    1.32    0.78   0
   8  20   9    1.18    1.00   0
   9  -6   1   29.65    0.44   0
   9   5   1    2.58    0.61   0
   9   9   2   23.00    0.77   0
   9  11   3    7.72    0.66   0
   9  13   4    9.27    0.72   0
   9  15   5    0.60    0.94   0
   9  16   6   20.71    0.86   0
  10 -13   4    2.49    0.25   0
  10  -7   2    0.46    0.39   0
  10   6   2   46.22    0.70   0
  10   7   2    5.70    0.75   0
  10  10   3    9.37    0.80   0
  10  12   4   51.02    1.01   0
  10  14   5    9.96    0.95   0
  10  15   6    2.65    0.84   0
  11 -11   4    2.32    0.41   0
  11  -8   3   23.44    0.53   0
  11  -3   2    5.62    0.59   0
  11  -2   2   23.79    0.60   0
  11  -1   2    8.96    0.59   0
  11   0   2   23.70    0.66   0
  11   1   2   28.32    0.70   0
  11   2   2   14.23    0.69   0
  11   7   3    9.31    0.84   0
  11  10   4   54.45    1.06   0
  11  12   5    5.99    1.02   0
  11  14   6    4.48    1.08   0
  11  15   7    5.46    1.15   0
  12 -11   5    1.21    0.48   0
  12  -8   4    7.52    0.59   0
  12  -3   3    0.99    0.67   0
  12  -2   3    5.87    0.66   0
  12  -1   3    2.96    0.69   0
  12   0   3   14.91    0.73   0
  12   1   3    9.23    0.75   0
  12   2   3   21.18    0.83   0
  12   3   3    2.16    0.76   0
  12   7   4    0.45    0.90   0
  12  10   5   10.67    1.06   0
  12  12   6    3.95    1.11   0
  12  13   7    4.28    1.02   0
  13  -8   5    0.22    0.65   0
  13  -3   4    7.46    0.78   0
  13  -2   4    1.09    0.80   0
  13  -1   4   20.88    0.81   0
  13   0   4   36.41    0.89   0
  13   1   4    0.41    0.81   0
  13   2   4    1.95    0.82   0
  13   6   5    1.25    0.96   0
  13   7   5    1.63    1.00   0
  13   9   6    2.65    1.14   0
  14  -6   6    0.50    0.80   0
  14   4   6    9.80    1.04   0
  14   5   6    4.75    1.13   0
 -10 -10  18    1.90    1.10   0
 -10  -9  17    1.18    0.94   0
 -10  -7  16    0.72    0.88   0
 -10  -6  16    2.59    0.82   0
 -10  -5  15   11.28    0.68   0
 -10  -4  15    0.60    0.72   0
 -10  -3  15    2.44    0.72   0
 -10  -2  15    3.65    0.70   0
 -10  -1  15    0.98    0.70   0
 -10   0  15   10.18    0.69   0
 -10   1  15    0.29    0.66   0
 -10   2  15    0.38    0.57   0
 -10   4  16    2.17    0.62   0
 -10   5  16    0.92    0.57   0
 -10   6  17    0.54    0.62   0
  -9 -14  17    0.68    0.95   0
  -9 -13  17    5.51    1.04   0
  -9 -12  16   10.15    1.02   0
  -9 -11  15    7.97    0.91   0
  -9  -9  14    4.24    0.84   0
  -9  -7  13    0.48    0.73   0
  -9  -4  12    2.63    0.62   0
  -9  -3  12    3.04    0.61   0
  -9  -2  12   30.44    0.63   0
  -9   0  12    4.80    0.58   0
  -9   1  12    8.87    0.57   0
  -9   2  12   21.33    0.58   0
  -9   5  13    3.06    0.50   0
  -9   9  15    3.32    0.42   0
  -9  10  16   10.62    0.49   0
  -9  11  17    1.81    0.48   0
  -8 -17  17   -0.41    0.97   0
  -8 -16  16    2.20    0.89   0
  -8 -15  15    1.86    0.82   0
  -8 -13  14    0.08    0.87   0
  -8 -12  13    7.48    0.87   0
  -8 -10  12   13.06    0.75   0
  -8  -8  11   10.71    0.69   0
  -8  -6  10    3.91    0.51   0
  -8  -5  10   12.55    0.58   0
  -8   4  10    4.52    0.39   0
  -8   7  11   13.99    0.37   0
  -8   9  12    0.61    0.32   0
  -7 -18  16   12.58    1.12   0
  -7 -17  15    6.29    1.00   0
  -7 -16  14    1.90    0.90   0
  -7 -15  13    2.72    0.90   0
  -7 -14  12   16.01    0.72   0
  -7 -12  11   21.29    0.77   0
  -7 -11  10    4.09    0.58   0
  -7  -9   9    3.64    0.53   0
  -7  -8   9   26.34    0.61   0
  -7  -6   8   14.62    0.47   0
  -7  -5   8   15.80    0.52   0
  -7  11  11    1.04    0.23   0
  -6 -20  16    5.06    1.18   0
  -6 -15  11    8.38    0.80   0
  -6 -14  10   20.50    0.65   0
  -6 -12   9    3.85    0.67   0
  -6 -10   8   67.45    0.71   0
  -6  -8   7   24.83    0.48   0
  -6  -4   6    3.42    0.35   0
  -6  -3   6   22.88    0.43   0
  -6   3   6   12.20    0.29   0
  -6   7   7   32.85    0.24   0
  -5 -21  15    0.23    1.12   0
  -5 -20  14    3.75    0.97   0
  -5 -17  11    2.08    0.77   0
  -5 -16  10    1.81    0.75   0
  -5 -15   9   11.34    0.60   0
  -5 -13   8    2.62    0.63   0
  -5 -11   7   30.91    0.61   0
  -5  -9   6    4.94    0.41   0
  -5  -6   5    4.62    0.35   0
  -4 -22  14    0.33    0.89   0
  -4 -21  13    0.31    0.81   0
  -4 -20  12   13.43    0.92   0
  -4 -19  11    1.02    0.79   0
  -4 -18  10    3.51    0.64   0
  -4 -15   8   28.25    0.70   0
  -4 -12   6  120.48    0.66   0
  -3 -23  14    0.97    1.04   0
  -3 -22  13    0.96    0.94   0
  -3 -17   8    1.62    0.55   0
  -3 -14   6   10.41    0.48   0
  -3 -12   5  120.04    0.60   0
  -2 -24  14    0.66    1.04   0
  -2 -23  13   10.15    0.95   0
  -2 -17   7   21.19    0.54   0
  -2  -6   2    5.40    0.26   0
  -1 -25  14   -0.37    0.88   0
  -1 -24  13    2.33    0.98   0
   0   8   1    7.73    0.22   0
   0  11   2    8.65    0.30   0
   2 -14   3   48.77    0.37   0
   2   7   0   59.77    0.34   0
   3 -16   4    9.18    0.37   0
   3   8   0  209.32    0.62   0
   3  11   1   25.05    0.46   0
   3  19   6    1.85    0.63   0
   4  -1  -1   17.74    0.22   0
   4   0  -1   10.64    0.24   0
   4   1  -1    2.13    0.26   0
   4   2  -1   31.49    0.32   0
   4   8   0   44.39    0.42   0
   4  11   1   31.95    0.45   0
   4  15   3    3.26    0.48   0
   4  17   4    6.40    0.66   0
   4  18   5   20.79    0.77   0
   4  19   6    4.98    0.63   0
   4  21   8    1.60    0.70   0
   4  22   9    0.31    0.92   0
   4  23  10    5.87    0.95   0
   5 -19   6    3.54    0.42   0
   5  -1  -1   11.52    0.31   0
   5   1  -1   17.99    0.34   0
   5   2  -1   34.35    0.38   0
   5   8   0  196.11    0.66   0
   5  11   1   73.12    0.58   0
   5  15   3    1.30    0.55   0
   5  18   5    0.77    0.78   0
   5  19   6    2.21    0.68   0
   5  20   7    2.32    0.73   0
   5  21   8    0.27    0.92   0
   5  22   9    3.06    0.98   0
   6 -20   7    3.87    0.43   0
   6  -7   0    8.12    0.17   0
   6   7   0   12.42    0.40   0
   6  11   1   18.18    0.60   0
   6  13   2   16.97    0.70   0
   6  15   3    8.59    0.72   0
   6  18   5    5.50    0.79   0
   6  19   6    1.79    0.88   0
   6  20   7    2.55    0.93   0
   6  21   8    5.11    1.01   0
   6  22   9    4.34    1.06   0
   7   6   0   11.73    0.43   0
   7  10   1    2.01    0.60   0
   7  12   2   49.97    0.68   0
   7  14   3   38.80    0.72   0
   7  16   4   30.10    0.88   0
   7  17   5    5.41    0.73   0
   8  -3   0   30.42    0.39   0
   8   3   0   27.39    0.44   0
   8   4   0   76.50    0.62   0
   8   9   1   51.68    0.74   0
   8  11   2   14.06    0.62   0
   8  15   4    1.90    0.70   0
   8  18   6    8.72    1.04   0
   8  19   7    2.95    1.08   0
   8  20   8    9.90    1.20   0
   9   6   1   39.95    0.60   0
   9   7   1   17.64    0.71   0
   9  10   2    5.73    0.75   0
   9  12   3    0.75    0.68   0
   9  14   4    8.54    0.74   0
   9  16   5    0.21    0.91   0
   9  17   6   -0.05    0.96   0
   9  18   7    2.45    0.93   0
   9  19   8    1.04    1.02   0
  10  -8   2    3.15    0.41   0
  10  -3   1    5.70    0.50   0
  10  -2   1    7.94    0.48   0
  10  -1   1    4.52    0.50   0
  10   0   1    2.42    0.51   0
  10   1   1    1.94    0.54   0
  10   2   1    5.30    0.58   0
  10   3   1    2.51    0.60   0
  10   8   2    3.50    0.77   0
  10  11   3   -0.15    0.80   0
  10  13   4   -0.64    0.93   0
  10  16   6    2.34    1.09   0
  10  17   7    0.09    0.95   0
  11  -4   2   36.49    0.63   0
  11   3   2   22.70    0.62   0
  11   4   2   51.76    0.83   0
  11   5   2    3.33    0.73   0
  11   8   3   13.46    0.71   0
  11  11   4    7.02    0.98   0
  11  16   7    5.13    1.23   0
  12  -9   4    1.65    0.55   0
  12  -5   3   17.52    0.65   0
  12  -4   3    6.43    0.57   0
  12   4   3    2.05    0.81   0
  12   5   3    5.95    0.84   0
  12   8   4   10.10    0.80   0
  12  11   5    1.89    1.10   0
  12  13   6    5.86    1.16   0
  13 -11   6    3.04    0.60   0
  13  -4   4   31.36    0.81   0
  13   3   4    0.87    0.91   0
  13   4   4   15.84    0.97   0
  13   8   5    1.45    1.08   0
  13  10   6    6.50    1.10   0
  14  -7   6    1.85    0.78   0
  14  -3   5    2.06    0.90   0
  14  -2   5    1.45    0.94   0
  14  -1   5    1.10    0.88   0
  14   0   5    6.17    0.92   0
  14   1   5    0.58    0.96   0
  14   2   5    2.14    0.98   0
  14   3   5   10.04    0.99   0
 -10  -9  18    0.06    1.05   0
 -10  -8  17    4.05    0.79   0
 -10  -7  17    0.17    0.91   0
 -10  -5  16    5.70    0.83   0
 -10  -4  16   17.43    0.81   0
 -10   3  16    2.04    0.67   0
 -10   5  17    2.00    0.67   0
 -10   7  18    0.37    0.60   0
  -9 -11  16   -0.71    0.92   0
  -9 -10  15    0.63    0.85   0
  -9  -8  14   33.81    0.87   0
  -9  -6  13    5.80    0.69   0
  -9  -5  13    2.29    0.65   0
  -9  -1  12    6.98    0.54   0
  -9   4  13    1.59    0.49   0
  -9   7  14    0.62    0.42   0
  -8 -16  17   -0.50    0.94   0
  -8 -15  16    1.21    0.86   0
  -8 -11  13    2.68    0.80   0
  -8  -9  12    9.24    0.72   0
  -8  -7  11    0.53    0.65   0
  -8  -4  10    5.41    0.54   0
  -8  -3  10    1.68    0.51   0
  -8   3  10   16.47    0.44   0
  -8  10  13    2.93    0.34   0
  -7 -18  17    1.38    1.06   0
  -7 -13  12   15.55    0.80   0
  -7 -10  10   -0.01    0.54   0
  -7  -7   9   12.48    0.56   0
  -7  -4   8    2.19    0.46   0
  -7  -3   8    3.75    0.44   0
  -7   3   8   16.05    0.36   0
  -7   4   8    8.79    0.32   0
  -7   7   9   24.48    0.32   0
  -6 -19  15    6.96    0.89   0
  -6 -18  14   -0.18    0.77   0
  -6 -17  13    9.99    0.79   0
  -6 -16  12    2.88    0.72   0
  -6 -13  10    5.29    0.69   0
  -6  -9   8   18.78    0.58   0
  -6  -7   7    0.86    0.39   0
  -6  -2   6   21.77    0.40   0
  -6  -1   6   44.21    0.41   0
  -6   0   6  118.90    0.48   0
  -6   1   6   36.81    0.38   0
  -6   2   6   62.63    0.36   0
  -6  11   9   17.66    0.19   0
  -5 -19  13    6.73    0.82   0
  -5 -18  12   16.48    0.73   0
  -5 -14   9    1.51    0.64   0
  -5  -8   6   84.46    0.59   0
  -5  -5   5    1.61    0.32   0
  -4 -22  15   -0.23    1.04   0
  -4 -21  14   -0.14    0.95   0
  -4 -16   9    3.60    0.70   0
  -4 -13   7   39.17    0.62   0
  -4 -11   6    3.75    0.49   0
  -4  -9   5    1.39    0.36   0
  -4  -6   4  246.00    0.62   0
  -3 -23  15    2.72    1.06   0
  -3 -21  12   -0.81    0.73   0
  -3 -20  11    0.27    0.67   0
  -3 -19  10    0.38    0.62   0
  -3 -15   7    0.65    0.47   0
  -3  -9   4   44.95    0.48   0
  -3  -6   3  209.82    0.54   0
  -2 -24  15    2.02    1.02   0
  -2 -22  12   12.18    0.88   0
  -2 -21  11    2.41    0.78   0
  -2 -19   9    5.46    0.56   0
  -2 -15   6   14.91    0.47   0
  -2  -9   3   30.71    0.36   0
  -2  21  11    4.44    0.56   0
  -1 -23  12    4.87    0.72   0
  -1 -22  11    5.18    0.79   0
  -1  -4   1   14.95    0.21   0
  -1   6   1  114.88    0.24   0
  -1  17   6    3.29    0.38   0
   0 -14   4    3.37    0.39   0
   0 -12   3    3.89    0.34   0
   0  18   6   30.25    0.54   0
   0  21   9    2.37    0.60   0
   1  -4   0    3.95    0.11   0
   1   6   0    1.25    0.20   0
   2 -17   5   24.59    0.42   0
   2  -9   1   20.64    0.22   0
   2   8   0  121.99    0.48   0
   2  11   1   80.73    0.50   0
   2  15   3    1.59    0.40   0
   2  22   9    0.65    0.74   0
   3 -24  11    3.20    0.72   0
   3 -20   7    9.84    0.51   0
   3 -14   3   29.44    0.35   0
   3 -12   2    5.28    0.24   0
   3  -1  -1    4.12    0.19   0
   3   0  -1   22.97    0.22   0
   3   1  -1    0.52    0.19   0
   3   2  -1   14.44    0.28   0
   3   3  -1    6.49    0.28   0
   3  23  10    1.50    0.86   0
   4 -20   7    1.29    0.50   0
   4 -16   4    1.21    0.31   0
   4  -2  -1  104.34    0.29   0
   4   3  -1    5.47    0.27   0
   4   4  -1   19.64    0.37   0
   4   9   0   41.56    0.49   0
   4  12   1   20.84    0.54   0
   4  14   2   26.35    0.61   0
   4  16   3   22.29    0.65   0
   5 -24  11   -0.03    0.71   0
   5 -20   7    1.43    0.43   0
   5  -2  -1   35.11    0.29   0
   5   3  -1   20.19    0.33   0
   5   4  -1   32.53    0.43   0
   5   9   0    8.84    0.49   0
   5  12   1    2.56    0.57   0
   5  14   2   73.82    0.74   0
   5  16   3   11.44    0.68   0
   5  17   4    3.13    0.60   0
   6 -23  10    1.07    0.57   0
   6  -1  -1   16.53    0.36   0
   6   0  -1   11.17    0.34   0
   6   1  -1    8.97    0.36   0
   6   2  -1   52.99    0.44   0
   6   3  -1   11.41    0.40   0
   6   8   0   29.36    0.46   0
   6  17   4    5.86    0.80   0
   7  -6   0    7.75    0.24   0
   7   7   0    3.18    0.42   0
   7  11   1   -0.17    0.63   0
   7  13   2   19.91    0.63   0
   7  15   3    9.55    0.80   0
   7  19   6    0.32    0.93   0
   7  20   7    2.88    0.83   0
   7  21   8   -0.72    1.05   0
   8  -4   0   54.58    0.42   0
   8   5   0   15.31    0.46   0
   8   6   0    3.69    0.57   0
   8  10   1    4.91    0.68   0
   8  12   2    9.68    0.61   0
   8  14   3   28.29    0.74   0
   8  16   4    0.50    0.87   0
   8  17   5    5.50    0.78   0
   9 -10   2    1.55    0.27   0
   9  -7   1   14.06    0.36   0
   9   0   0  102.62    0.64   0
   9   1   0   52.87    0.60   0
   9   2   0  199.21    0.81   0
   9   8   1   31.82    0.76   0
   9  11   2   15.39    0.82   0
   9  13   3    2.53    0.69   0
   9  15   4    1.21    0.95   0
   9  18   6    0.45    1.04   0
   9  19   7    1.23    1.19   0
  10 -11   3    4.17    0.30   0
  10  -4   1    2.24    0.47   0
  10   4   1   11.71    0.56   0
  10   5   1   33.52    0.75   0
  10   9   2    8.19    0.78   0
  10  12   3    0.85    0.85   0
  10  14   4    1.22    0.92   0
  10  15   5    1.44    0.83   0
  10  18   7   -0.47    1.21   0
  11  -9   3   22.93    0.49   0
  11  -5   2    4.26    0.52   0
  11   6   2    3.73    0.80   0
  11   9   3    6.32    0.74   0
  11  10   3    1.91    0.89   0
  11  12   4    3.13    1.01   0
  11  14   5    6.54    1.10   0
  11  15   6   -0.58    0.93   0
  12  -6   3   16.64    0.61   0
  12   6   3    9.82    0.84   0
  12   7   3    6.83    0.87   0
  12   9   4   -0.46    0.84   0
  12  10   4    5.22    1.00   0
  12  12   5    4.29    1.15   0
  12  14   6    3.22    1.17   0
  13  -9   5    0.36    0.63   0
  13  -6   4    4.19    0.71   0
  13  -5   4    3.87    0.64   0
  13   5   4    2.92    0.80   0
  13   6   4    3.17    1.01   0
  13   9   5    0.11    1.06   0
  13  11   6    0.92    0.96   0
  14  -5   5    0.44    0.79   0
  14  -4   5    0.15    0.76   0
  14   4   5    1.14    1.05   0
  14   5   5    0.23    1.10   0
 -10  -9  19    0.90    1.08   0
 -10  -8  18   10.78    0.85   0
 -10  -7  18    4.42    0.95   0
 -10  -6  17    1.20    0.84   0
 -10  -5  17    4.45    0.87   0
 -10  -3  16    0.68    0.71   0
 -10  -2  16    0.53    0.70   0
 -10  -1  16    2.66    0.70   0
 -10   0  16   18.71    0.73   0
 -10   1  16    3.73    0.64   0
 -10   2  16   15.20    0.64   0
 -10   4  17    0.34    0.64   0
 -10   6  18    0.48    0.68   0
  -9 -13  18    2.06    0.93   0
  -9 -12  17    0.34    0.88   0
  -9 -11  17    4.36    0.94   0
  -9 -10  16    8.86    0.93   0
  -9  -9  15    1.58    0.70   0
  -9  -7  14    6.89    0.73   0
  -9  -6  14    0.93    0.68   0
  -9  -4  13   10.70    0.66   0
  -9  -3  13   14.56    0.65   0
  -9   3  13    1.49    0.53   0
  -9   6  14   -0.14    0.50   0
  -9   8  15    0.77    0.47   0
  -8 -16  18    0.46    0.96   0
  -8 -15  17   -0.66    1.03   0
  -8 -14  16    3.35    0.96   0
  -8 -13  15    0.09    0.76   0
  -8 -12  14    8.64    0.73   0
  -8 -10  13    6.71    0.78   0
  -8  -8  12    8.27    0.70   0
  -8  -6  11    3.99    0.60   0
  -8  -2  10   26.16    0.54   0
  -8  -1  10    1.99    0.46   0
  -8   0  10    3.18    0.44   0
  -8   1  10   23.00    0.45   0
  -8   2  10   27.70    0.44   0
  -8   6  11   21.71    0.42   0
  -8   8  12   13.20    0.39   0
  -8  11  14    1.08    0.36   0
  -7 -17  16    0.30    0.84   0
  -7 -16  15    5.77    0.82   0
  -7 -15  14    3.63    0.74   0
  -7 -14  13   10.70    0.72   0
  -7 -12  12    0.74    0.75   0
  -7 -11  11    2.25    0.56   0
  -7  -9  10    1.84    0.52   0
  -7  -6   9   15.04    0.56   0
  -7  -2   8    6.50    0.43   0
  -7  -1   8  100.68    0.56   0
  -7   0   8  101.92    0.54   0
  -7   1   8    2.64    0.41   0
  -7   2   8   39.77    0.44   0
  -7   9  10    4.46    0.29   0
  -6 -20  17   -0.10    1.00   0
  -6 -19  16    1.38    0.89   0
  -6 -18  15    1.37    0.95   0
  -6 -17  14    9.13    0.93   0
  -6 -16  13    6.92    0.90   0
  -6 -15  12   12.90    0.80   0
  -6 -14  11   14.49    0.64   0
  -6 -12  10    0.75    0.65   0
  -6 -11   9   15.79    0.55   0
  -6  -6   7    1.75    0.38   0
  -5 -21  16    3.20    0.95   0
  -5 -20  15    0.62    0.88   0
  -5 -19  14    2.33    0.95   0
  -5 -18  13    1.19    0.87   0
  -5 -17  12    0.37    0.80   0
  -5 -16  11   19.39    0.79   0
  -5 -15  10    9.29    0.62   0
  -5 -12   8   13.37    0.50   0
  -5 -10   7    3.56    0.45   0
  -5  -7   6    9.55    0.45   0
  -5  -4   5   16.02    0.34   0
  -5  -3   5   67.09    0.45   0
  -4 -22  16    0.96    1.13   0
  -4 -20  13   -0.39    0.75   0
  -4 -19  12    0.43    0.71   0
  -4 -18  11    2.46    0.65   0
  -4 -17  10    8.88    0.62   0
  -4 -14   8   18.85    0.63   0
  -4  -8   5    9.92    0.45   0
  -4  -5   4   18.63    0.34   0
  -3 -22  14    1.84    0.93   0
  -3 -21  13    0.99    0.91   0
  -3 -20  12   43.50    0.91   0
  -3 -18  10   29.77    0.77   0
  -3 -16   8   27.67    0.58   0
  -3 -11   5   56.08    0.46   0
  -3  -5   3    5.74    0.35   0
  -2 -23  14    4.97    1.00   0
  -2 -22  13    2.34    0.88   0
  -2 -16   7   19.64    0.51   0
  -2  22  12    0.60    0.61   0
  -1 -24  14    6.13    0.98   0
  -1 -23  13    1.31    0.86   0
   0 -24  13    1.32    0.87   0
   0   3   0    3.18    0.13   0
   0   9   1  315.21    0.52   0
   1 -22  10    1.54    0.69   0
   1 -21   9    0.99    0.63   0
   1 -20   8    3.89    0.59   0
   1   7   0   14.55    0.28   0
   2  17   4    8.47    0.54   0
   3 -17   5    1.55    0.40   0
   3   4  -1  116.02    0.42   0
   3   9   0   10.10    0.34   0
   3  12   1   13.83    0.39   0
   3  19   5   10.65    0.68   0
   3  20   6    1.59    0.70   0
   3  23   9   -0.09    0.83   0
   4 -22   9    0.10    0.53   0
   4 -21   8   19.67    0.52   0
   4 -14   3   72.42    0.37   0
   4   5  -1    1.33    0.30   0
   4  10   0  180.06    0.69   0
   4  18   4   42.99    0.79   0
   4  19   5    8.38    0.76   0
   4  20   6   40.73    0.77   0
   4  21   7   -0.28    0.68   0
   4  22   8    3.82    0.88   0
   4  23   9    0.09    0.95   0
   5 -22   9    2.86    0.57   0
   5 -14   3   38.10    0.29   0
   5  -3  -1   16.83    0.22   0
   5   5  -1   49.64    0.41   0
   5  10   0  156.14    0.71   0
   5  18   4    4.94    0.75   0
   5  19   5    4.20    0.77   0
   5  20   6   -0.45    0.68   0
   5  21   7    0.07    0.74   0
   5  22   8   -0.19    0.92   0
   5  23   9    0.86    1.05   0
   6 -17   5   41.77    0.40   0
   6  -2  -1    1.71    0.29   0
   6   4  -1   90.71    0.53   0
   6   5  -1   31.12    0.47   0
   6   9   0    9.98    0.44   0
   6  12   1    8.89    0.53   0
   6  14   2    7.00    0.57   0
   6  16   3    4.48    0.60   0
   6  19   5    6.18    0.87   0
   6  20   6   12.99    0.95   0
   6  21   7    0.20    0.94   0
   6  22   8   -0.15    1.10   0
   7 -18   6   27.43    0.38   0
   7   0  -1   19.66    0.41   0
   7   1  -1   16.36    0.40   0
   7   2  -1   72.54    0.51   0
   7   8   0  124.77    0.68   0
   7   9   0    5.74    0.56   0
   7  14   2   62.18    0.86   0
   7  17   4    1.01    0.69   0
   7  21   7   -0.10    1.01   0
   8  -5   0   11.01    0.31   0
   8   7   0    6.69    0.59   0
   8  11   1   18.08    0.71   0
   8  13   2    8.63    0.77   0
   8  15   3    6.46    0.84   0
   8  19   6    1.58    0.86   0
   8  20   7    0.45    0.92   0
   9  -2   0  145.89    0.63   0
   9  -1   0   61.55    0.55   0
   9   3   0    7.73    0.48   0
   9   4   0   22.53    0.62   0
   9   5   0   64.40    0.69   0
   9   9   1   13.43    0.72   0
   9  12   2   12.81    0.83   0
   9  14   3    3.37    0.89   0
   9  16   4    9.57    0.94   0
   9  17   5    1.49    0.81   0
  10  -5   1    0.24    0.44   0
  10   6   1    6.11    0.59   0
  10   7   1    1.92    0.73   0
  10  10   2   20.92    0.71   0
  10  13   3    1.23    0.88   0
  10  16   5    2.33    1.01   0
  10  17   6   -0.08    0.92   0
  11  -6   2    0.98    0.50   0
  11   7   2    1.94    0.68   0
  11   8   2   19.34    0.87   0
  11  11   3    3.48    0.96   0
  11  15   5    0.27    1.08   0
  11  16   6    6.86    1.00   0
  12 -12   5    1.64    0.43   0
  12  -1   2    2.46    0.74   0
  12   0   2   22.17    0.72   0
  12   1   2    0.75    0.71   0
  12   2   2    8.59    0.76   0
  12   3   2   10.18    0.79   0
  12   8   3    7.36    0.95   0
  12  11   4    3.37    1.08   0
  12  13   5    2.39    1.19   0
  13  -1   3   -0.23    0.79   0
  13   0   3    2.16    0.77   0
  13   1   3    1.87    0.79   0
  13   2   3    2.67    0.84   0
  13   3   3    1.02    0.82   0
  13   7   4    6.56    0.87   0
  13   8   4   10.68    1.09   0
  13  10   5    1.18    0.93   0
  14  -6   5    0.42    0.75   0
  14   6   5    3.84    1.09   0
  14   7   5    1.00    1.14   0
 -10  -8  19    3.75    0.86   0
 -10  -7  19   -0.56    0.96   0
 -10  -6  18    3.55    0.95   0
 -10  -5  18   -0.40    0.85   0
 -10  -4  17   -0.72    0.79   0
 -10  -3  17   11.98    0.82   0
 -10  -2  17    4.43    0.81   0
 -10  -1  17    4.35    0.80   0
 -10   1  17    1.77    0.76   0
 -10   2  17    1.48    0.70   0
 -10   3  17    0.07    0.70   0
 -10   5  18    1.22    0.66   0
  -9 -12  18    2.61    0.89   0
  -9 -10  17    0.35    0.90   0
  -9  -9  16    5.77    0.87   0
  -9  -8  15    0.89    0.68   0
  -9  -7  15    2.25    0.75   0
  -9  -5  14    1.21    0.69   0
  -9  -2  13   21.64    0.63   0
  -9  -1  13   12.45    0.61   0
  -9   0  13    1.98    0.53   0
  -9   1  13   -0.11    0.50   0
  -9   2  13    2.31    0.49   0
  -9   5  14    5.65    0.54   0
  -9   9  16    3.57    0.48   0
  -9  10  17    0.07    0.51   0
  -8 -15  18    3.54    1.09   0
  -8 -14  17    2.26    1.07   0
  -8 -13  16   -0.17    0.97   0
  -8 -12  15    6.98    0.87   0
  -8 -11  14    0.99    0.68   0
  -8  -9  13    3.02    0.74   0
  -8  -7  12    0.91    0.65   0
  -8  -5  11    5.55    0.49   0
  -8  -4  11   17.09    0.59   0
  -8   5  11    5.21    0.39   0
  -8  12  15   10.82    0.38   0
  -8  13  16    0.76    0.36   0
  -7 -17  17   -0.05    0.88   0
  -7 -16  16    0.65    0.93   0
  -7 -15  15   -0.43    0.91   0
  -7 -14  14   12.30    0.88   0
  -7 -13  13    0.43    0.65   0
  -7 -10  11    1.05    0.56   0
  -7  -8  10    1.20    0.50   0
  -7  -5   9   13.78    0.53   0
  -7   6   9   38.04    0.35   0
  -7  12  12    0.04    0.24   0
  -6 -19  17    0.30    1.08   0
  -6 -18  16    0.80    0.98   0
  -6 -13  11    9.84    0.72   0
  -6 -10   9    8.11    0.50   0
  -6  -8   8   31.88    0.50   0
  -6  -5   7    4.29    0.36   0
  -6  -4   7   56.13    0.50   0
  -6   6   7  112.85    0.35   0
  -6   9   8   25.46    0.21   0
  -5 -21  17    1.44    0.96   0
  -5 -20  16   -0.47    1.11   0
  -5 -14  10    5.46    0.69   0
  -5 -13   9   19.16    0.58   0
  -5 -11   8    1.79    0.55   0
  -5  -9   7    7.21    0.51   0
  -5  -2   5  113.20    0.48   0
  -5   4   5   70.90    0.29   0
  -4 -21  15    0.97    0.86   0
  -4 -20  14   24.07    1.01   0
  -4 -19  13   11.26    0.88   0
  -4 -16  10   40.49    0.78   0
  -4 -15   9   10.06    0.56   0
  -4 -12   7   16.31    0.47   0
  -4 -10   6   13.43    0.41   0
  -4  -4   4   50.68    0.41   0
  -4   6   4   20.12    0.13   0
  -3 -23  16    0.87    0.93   0
  -3 -22  15    0.98    0.98   0
  -3 -19  11    5.03    0.65   0
  -3 -14   7  112.82    0.67   0
  -3  -8   4   86.65    0.46   0
  -2 -21  12    0.49    0.79   0
  -2  -8   3   70.78    0.40   0
  -1 -24  15    5.48    1.02   0
  -1 -10   3   15.08    0.32   0
  -1  -3   1   25.63    0.23   0
   0 -24  14   -0.32    0.93   0
   1  11   1   15.00    0.37   0
   2 -23  11   -0.16    0.69   0
   2 -13   3   57.66    0.38   0
   2 -11   2   49.73    0.32   0
   2   9   0    9.91    0.37   0
   2  12   1   17.92    0.42   0
   2  22   8    2.17    0.75   0
   2  23   9    0.67    0.81   0
   3  -2  -1  173.72    0.26   0
   3   5  -1    1.59    0.28   0
   3  10   0    4.47    0.42   0
   3  13   1    6.99    0.47   0
   3  15   2   10.63    0.57   0
   4 -17   5    0.12    0.35   0
   4 -12   2   71.09    0.28   0
   4  -3  -1   10.98    0.17   0
   4   6  -1   19.43    0.35   0
   4  13   1    7.22    0.45   0
   4  15   2    6.19    0.49   0
   4  17   3   13.83    0.69   0
   5 -17   5   12.58    0.37   0
   5   6  -1   33.09    0.40   0
   5   7  -1   25.65    0.46   0
   5  13   1   55.80    0.61   0
   5  15   2    9.71    0.57   0
   5  17   3   19.76    0.76   0
   6  -3  -1   34.55    0.29   0
   6   6  -1   27.46    0.48   0
   6  10   0  162.03    0.74   0
   6  13   1    5.84    0.65   0
   6  15   2   10.21    0.72   0
   6  17   3    8.13    0.75   0
   6  18   4   13.05    0.71   0
   7  -1  -1    5.51    0.33   0
   7   3  -1   24.78    0.39   0
   7   4  -1   12.19    0.45   0
   7   5  -1    6.80    0.46   0
   7  10   0    3.08    0.57   0
   7  12   1   22.05    0.60   0
   7  16   3   30.00    0.75   0
   7  19   5    9.03    0.79   0
   7  20   6    4.20    0.86   0
   7  22   8    0.53    0.96   0
   8  -9   1   30.59    0.24   0
   8   8   0   36.88    0.57   0
   8  14   2    2.12    0.80   0
   8  16   3    5.48    0.85   0
   8  17   4   -0.18    0.75   0
   8  21   7   -0.37    1.14   0
   9  -3   0   15.55    0.41   0
   9   6   0   59.10    0.72   0
   9  10   1   11.69    0.62   0
   9  13   2   14.75    0.85   0
   9  15   3    0.44    0.93   0
   9  18   5    0.65    1.06   0
   9  19   6    1.35    1.09   0
   9  20   7    0.44    1.01   0
  10  -9   2    1.92    0.35   0
  10   8   1    5.67    0.73   0
  10  11   2   17.64    0.72   0
  10  15   4    2.93    0.83   0
  10  17   5   -0.09    1.11   0
  10  18   6   15.07    1.03   0
  11 -12   4    9.63    0.33   0
  11  -7   2    8.16    0.48   0
  11  -2   1    4.35    0.61   0
  11  -1   1   -0.37    0.56   0
  11   0   1   19.50    0.62   0
  11   1   1   30.19    0.66   0
  11   2   1    4.09    0.64   0
  11   3   1   10.58    0.67   0
  11   4   1    0.82    0.69   0
  11   5   1    1.71    0.71   0
  11   9   2    3.21    0.84   0
  11  12   3    4.92    1.01   0
  12 -14   6    2.52    0.34   0
  12 -10   4   13.17    0.50   0
  12  -7   3   11.49    0.55   0
  12  -3   2    3.88    0.64   0
  12  -2   2   16.67    0.67   0
  12   4   2    4.79    0.67   0
  12   5   2    4.10    0.82   0
  12   6   2    5.23    0.81   0
  12   9   3    5.46    0.82   0
  12  10   3   10.61    0.99   0
  12  12   4    5.43    1.13   0
  12  14   5    2.72    1.22   0
  13 -12   6    0.43    0.51   0
  13 -10   5    2.36    0.56   0
  13  -7   4    3.64    0.62   0
  13  -3   3    1.07    0.74   0
  13  -2   3   13.86    0.72   0
  13   4   3    1.47    0.87   0
  13   5   3    4.79    0.96   0
  13   6   3    0.72    0.93   0
  13   9   4    0.80    1.02   0
  13  11   5   -0.09    0.97   0
  14  -7   5    1.01    0.76   0
  14  -2   4   16.32    0.86   0
  14  -1   4   13.20    0.88   0
  14   0   4    1.26    0.89   0
  14   1   4    4.33    0.94   0
  14   2   4   16.31    1.01   0
  14   3   4    2.13    0.98   0
  14   4   4    1.54    1.03   0
  14   5   4    4.81    1.02   0
 -10  -6  19   -0.05    0.97   0
 -10  -5  19    1.18    0.91   0
 -10  -4  18    2.22    0.86   0
 -10  -3  18    0.67    0.82   0
 -10   0  17    5.84    0.70   0
 -10   3  18    0.06    0.73   0
 -10   4  18    0.99    0.71   0
  -9 -12  19   -0.18    0.93   0
  -9 -11  18   -0.48    0.85   0
  -9 -11  19    6.33    1.05   0
  -9 -10  18    6.27    0.94   0
  -9  -9  17    0.22    0.90   0
  -9  -8  16    0.23    0.83   0
  -9  -6  15    1.26    0.73   0
  -9  -4  14   32.30    0.73   0
  -9  -3  14    6.21    0.65   0
  -9  -2  14    8.68    0.70   0
  -9   4  14    3.98    0.53   0
  -9   7  15    3.84    0.47   0
  -8 -15  19    1.44    1.12   0
  -8 -14  18    2.54    1.10   0
  -8 -13  17    2.07    0.99   0
  -8 -12  16    1.95    0.95   0
  -8 -11  15    1.81    0.87   0
  -8 -10  14   36.92    0.75   0
  -8  -8  13    4.88    0.73   0
  -8  -6  12    2.32    0.64   0
  -8  -3  11    6.92    0.54   0
  -8  -2  11    8.98    0.52   0
  -8   3  11    8.41    0.44   0
  -8   7  12   10.00    0.39   0
  -8   9  13    1.80    0.37   0
  -7 -17  18    2.79    0.94   0
  -7 -16  17    3.01    1.05   0
  -7 -15  16   -0.95    0.94   0
  -7 -14  15    8.45    0.87   0
  -7 -13  14   -0.10    0.83   0
  -7 -12  13   20.47    0.82   0
  -7 -11  12    1.70    0.59   0
  -7  -9  11    0.82    0.62   0
  -7  -7  10    2.23    0.54   0
  -7  -4   9   13.16    0.51   0
  -7  15  15    2.96    0.29   0
  -6 -19  18   -0.59    1.18   0
  -6 -18  17    2.25    1.02   0
  -6 -17  15    5.21    0.78   0
  -6 -16  14   14.25    0.81   0
  -6 -15  13    3.97    0.70   0
  -6 -14  12   16.35    0.68   0
  -6 -12  11    9.89    0.69   0
  -6 -11  10    8.92    0.56   0
  -6  -9   9    4.34    0.58   0
  -6  -7   8    6.01    0.44   0
  -6  -3   7   50.53    0.48   0
  -5 -20  17    2.37    1.15   0
  -5 -19  15    1.60    0.83   0
  -5 -18  14    4.57    0.74   0
  -5 -17  13    9.22    0.84   0
  -5 -16  12   31.25    0.74   0
  -5 -15  11   10.10    0.66   0
  -5 -12   9    6.01    0.60   0
  -5  -8   7   14.24    0.49   0
  -5  -6   6   61.05    0.45   0
  -5  -1   5   44.85    0.37   0
  -5   0   5   21.87    0.32   0
  -5   1   5   57.98    0.36   0
  -5   2   5    8.88    0.27   0
  -5   3   5  137.70    0.36   0
  -5   8   6   25.41    0.16   0
  -4 -21  16   -0.75    1.09   0
  -4 -18  12   44.88    0.80   0
  -4 -17  11    2.40    0.61   0
  -4 -13   8    5.34    0.48   0
  -4 -11   7   14.59    0.53   0
  -4  -9   6    8.67    0.44   0
  -4  -7   5    9.93    0.36   0
  -4  -3   4   28.47    0.37   0
  -3 -21  14   -1.01    0.91   0
  -3 -20  13    1.14    0.87   0
  -3 -19  12   -0.80    0.77   0
  -3 -16   9    0.97    0.68   0
  -3 -15   8    7.89    0.49   0
  -3  -4   3   85.19    0.35   0
  -3   8   3   56.25    0.12   0
  -2 -23  15    6.18    0.90   0
  -2 -22  14    0.99    0.94   0
  -2 -15   7   45.08    0.65   0
  -2 -12   5   32.18    0.41   0
  -2 -10   4   13.20    0.35   0
  -1 -23  14    1.00    0.95   0
  -1 -15   6    4.03    0.39   0
  -1   7   1   52.36    0.22   0
   0 -23  13    2.96    0.88   0
   0 -16   6    0.08    0.46   0
   0 -13   4    4.05    0.35   0
   0 -11   3  458.23    0.76   0
   0   4   0  144.76    0.26   0
   1 -18   7    2.13    0.48   0
   2   1  -1    0.86    0.21   0
   2   2  -1   39.54    0.23   0
   2   3  -1    6.03    0.26   0
   2  24  10    0.71    0.86   0
   3 -19   7    2.80    0.51   0
   3 -15   4    5.85    0.33   0
   3   6  -1  115.50    0.43   0
   3  11   0   32.79    0.46   0
   3  20   5    6.20    0.68   0
   3  21   6    4.09    0.74   0
   3  22   7    1.87    0.79   0
   3  23   8    0.60    0.79   0
   4 -24  12    0.34    0.70   0
   4 -18   6   15.04    0.47   0
   4   7  -1   66.29    0.44   0
   4  11   0   48.02    0.47   0
   4  14   1   -0.06    0.56   0
   4  16   2   42.38    0.67   0
   4  19   4    2.43    0.70   0
   4  20   5   21.21    0.78   0
   4  21   6    0.31    0.66   0
   4  22   7    0.74    0.72   0
   4  23   8    3.28    0.95   0
   5 -24  12    5.09    0.79   0
   5   8  -1   87.25    0.57   0
   5  11   0    4.39    0.44   0
   5  14   1    9.66    0.63   0
   5  16   2    0.25    0.68   0
   5  19   4    0.43    0.78   0
   5  20   5   -0.33    0.67   0
   5  21   6    0.67    0.73   0
   5  22   7    0.40    0.78   0
   5  23   8    0.94    0.98   0
   6 -18   6    3.07    0.39   0
   6   7  -1   30.98    0.43   0
   6  11   0   29.00    0.54   0
   6  14   1   36.13    0.74   0
   6  16   2   38.79    0.77   0
   6  19   4    0.63    0.81   0
   6  20   5    1.76    0.86   0
   6  21   6    0.72    0.76   0
   6  22   7    1.09    0.88   0
   7 -22  10    5.67    0.57   0
   7 -20   8    2.57    0.44   0
   7  -7   0    0.99    0.19   0
   7  -2  -1   10.25    0.32   0
   7   6  -1   21.84    0.43   0
   7  11   0    3.20    0.61   0
   7  13   1    8.99    0.60   0
   7  15   2    1.14    0.65   0
   7  17   3    5.18    0.81   0
   7  20   5    2.35    0.94   0
   7  21   6    0.43    1.05   0
   7  22   7    0.16    1.14   0
   8  -6   0    5.51    0.29   0
   8   0  -1   14.73    0.43   0
   8   1  -1    0.71    0.42   0
   8   2  -1   11.32    0.46   0
   8   4  -1   84.30    0.62   0
   8   9   0    8.94    0.54   0
   8  10   0    4.71    0.66   0
   8  12   1   10.56    0.62   0
   8  15   2    1.51    0.79   0
   8  19   5    2.18    0.82   0
   9  -8   1    9.83    0.32   0
   9  -4   0   29.85    0.44   0
   9   7   0   16.20    0.58   0
   9   8   0    5.98    0.70   0
   9  11   1    2.80    0.65   0
   9  14   2    1.89    0.84   0
   9  17   4   -0.03    0.81   0
   9  20   6   14.22    1.20   0
  10  -6   1    5.33    0.41   0
  10  -1   0    3.99    0.55   0
  10   0   0   30.43    0.56   0
  10   1   0    4.97    0.54   0
  10   2   0    3.40    0.57   0
  10   3   0   27.72    0.65   0
  10   4   0   51.46    0.73   0
  10   5   0   25.33    0.70   0
  10   9   1    1.39    0.65   0
  10  10   1    1.01    0.77   0
  10  12   2    4.46    0.73   0
  10  14   3    0.56    0.78   0
  10  16   4    3.97    0.86   0
  11 -10   3    1.09    0.37   0
  11  -3   1    5.32    0.52   0
  11   6   1   14.28    0.78   0
  11   7   1   11.78    0.83   0
  11  10   2    1.66    0.75   0
  11  13   3    4.91    1.05   0
  11  15   4    2.44    1.13   0
  11  16   5    3.24    0.98   0
  12  -8   3   27.06    0.57   0
  12  -4   2   25.55    0.65   0
  12   7   2    3.75    0.87   0
  12   8   2   11.51    0.91   0
  12  11   3    2.02    1.06   0
  12  13   4    1.43    1.09   0
  13  -8   4    6.05    0.64   0
  13  -4   3    2.69    0.65   0
  13   7   3   10.63    0.99   0
  13   8   3   -0.41    0.99   0
  13  10   4    0.65    0.92   0
  13  11   4    0.77    1.09   0
  14  -4   4    0.36    0.83   0
  14  -3   4   10.63    0.81   0
  14   6   4    1.79    1.06   0
  14   7   4    2.63    1.15   0
 -10  -6  20    3.76    1.02   0
 -10  -5  20    0.80    0.93   0
 -10  -4  19    1.23    0.90   0
 -10  -3  19    0.82    0.82   0
 -10  -2  18    3.17    0.80   0
 -10  -1  18    0.36    0.76   0
 -10   0  18    2.15    0.74   0
 -10   1  18    1.90    0.72   0
 -10   4  19    1.10    0.74   0
 -10   5  19    0.91    0.70   0
  -9 -10  19    0.82    0.98   0
  -9  -9  18    1.88    0.92   0
  -9  -8  17    0.73    0.86   0
  -9  -7  16    2.20    0.79   0
  -9  -6  16    5.69    0.75   0
  -9  -5  15    2.02    0.69   0
  -9  -4  15    5.35    0.72   0
  -9  -1  14    1.27    0.60   0
  -9   0  14   14.39    0.59   0
  -9   1  14    2.04    0.54   0
  -9   2  14    1.02    0.51   0
  -9   6  15    4.75    0.51   0
  -9   8  16    3.34    0.51   0
  -9   9  17    0.08    0.55   0
  -9  10  18    1.40    0.58   0
  -8 -14  19    0.86    1.15   0
  -8 -13  18    0.49    1.00   0
  -8 -12  17    4.23    0.93   0
  -8 -11  16    1.42    0.85   0
  -8 -10  15    3.38    0.84   0
  -8  -9  14    4.83    0.64   0
  -8  -7  13    0.86    0.67   0
  -8  -5  12   16.01    0.63   0
  -8  -4  12   26.80    0.64   0
  -8  -1  11    6.45    0.49   0
  -8   0  11    0.98    0.45   0
  -8   1  11    1.13    0.44   0
  -8   2  11   21.53    0.45   0
  -7 -17  19    0.44    1.00   0
  -7 -16  18    4.69    1.08   0
  -7 -15  17   -0.41    0.94   0
  -7 -11  13    0.51    0.74   0
  -7 -10  12   29.36    0.64   0
  -7  -8  11    5.99    0.65   0
  -7  -6  10   38.80    0.60   0
  -7  -3   9    0.73    0.38   0
  -7  -2   9    1.69    0.44   0
  -7   5   9    0.44    0.31   0
  -7   8  10   11.18    0.32   0
  -7  13  13    2.76    0.28   0
  -7  14  14   -0.02    0.04   0
  -6 -17  16    0.31    0.79   0
  -6 -16  15   10.77    0.93   0
  -6 -15  14    0.48    0.87   0
  -6 -14  13    8.67    0.82   0
  -6 -13  12    6.19    0.63   0
  -6 -10  10    0.92    0.61   0
  -6  -8   9   37.45    0.61   0
  -6  -6   8  129.03    0.61   0
  -6  -2   7   64.23    0.48   0
  -6   5   7   32.65    0.29   0
  -5 -20  18    1.73    1.16   0
  -5 -19  16    0.37    0.85   0
  -5 -18  15    3.37    0.91   0
  -5 -17  14    1.08    0.84   0
  -5 -14  11   14.21    0.73   0
  -5 -13  10    5.61    0.55   0
  -5 -10   8   35.97    0.51   0
  -5  -5   6    6.71    0.34   0
  -4 -21  17    3.14    1.13   0
  -4 -20  15    0.72    0.84   0
  -4 -19  14    2.84    0.87   0
  -4 -18  13    0.03    0.84   0
  -4 -17  12    3.79    0.77   0
  -4 -16  11    0.70    0.72   0
  -4 -15  10    3.58    0.68   0
  -4 -14   9    8.76    0.54   0
  -4  -6   5   35.33    0.45   0
  -4  -2   4  358.48    0.61   0
  -3 -22  16    7.96    0.91   0
  -3 -21  15    1.31    0.95   0
  -3 -18  11    5.15    0.63   0
  -3 -13   7   12.63    0.46   0
  -3 -11   6    8.46    0.46   0
  -3  -3   3    3.25    0.28   0
  -2 -23  16    2.19    1.03   0
  -2 -21  13    0.29    0.69   0
  -2 -16   8   17.62    0.52   0
  -2  -7   3   10.86    0.29   0
  -2  -3   2  199.50    0.42   0
  -1 -22  13    5.13    0.71   0
  -1 -16   7   58.74    0.56   0
  -1  -9   3   81.51    0.44   0
   0   5   0    5.33    0.17   0
   1 -24  14   10.17    0.93   0
   1 -20   9    1.52    0.61   0
   2   0  -1  245.33    0.31   0
   2   4  -1   95.89    0.34   0
   2   5  -1   14.46    0.30   0
   2  10   0   73.15    0.42   0
   2  13   1    1.79    0.34   0
   2  20   5    5.01    0.64   0
   2  23   8    2.19    0.78   0
   3  -9   1   18.43    0.18   0
   3   7  -1    7.16    0.31   0
   3  14   1   27.86    0.55   0
   3  16   2   13.35    0.59   0
   3  24   9    0.93    0.92   0
   4 -22  10   -0.28    0.65   0
   4 -21   9    0.46    0.57   0
   4 -20   8    0.14    0.50   0
   4 -19   7   11.77    0.48   0
   4 -15   4   59.51    0.40   0
   4   8  -1   22.94    0.39   0
   4  12   0   88.52    0.64   0
   4  18   3   18.76    0.73   0
   5 -23  11    2.01    0.68   0
   5 -19   7    0.98    0.46   0
   5 -18   6   35.17    0.48   0
   5  -4  -1   11.39    0.19   0
   5   9  -1   65.44    0.56   0
   5  12   0   94.48    0.63   0
   5  18   3    7.55    0.74   0
   5  22   6   17.76    0.95   0
   5  23   7    0.47    0.93   0
   6 -22  10    0.12    0.60   0
   6 -19   7    1.03    0.43   0
   6  -4  -1   98.27    0.34   0
   6   8  -1    2.42    0.40   0
   6   9  -1   91.75    0.65   0
   6  12   0   18.77    0.52   0
   6  18   3    1.60    0.78   0
   7  -3  -1   38.20    0.32   0
   7   7  -1   80.42    0.57   0
   7   8  -1    9.40    0.54   0
   7  12   0   43.77    0.73   0
   7  14   1   42.38    0.70   0
   7  16   2    2.87    0.77   0
   7  18   3    4.91    0.86   0
   7  19   4    1.25    0.76   0
   8  -2  -1   76.26    0.51   0
   8  -1  -1   13.81    0.41   0
   8   5  -1    7.05    0.43   0
   8   6  -1   10.62    0.58   0
   8  11   0   21.70    0.74   0
   8  13   1    6.72    0.65   0
   8  17   3    0.48    0.74   0
   8  21   6    0.17    1.11   0
   9  -5   0   42.33    0.44   0
   9   9   0    3.21    0.69   0
   9  12   1    0.63    0.64   0
   9  16   3    2.92    0.78   0
   9  18   4    7.29    1.05   0
   9  19   5    0.17    0.92   0
  10  -2   0    3.80    0.46   0
  10   6   0   18.61    0.61   0
  10   7   0   10.77    0.74   0
  10  11   1    3.47    0.82   0
  10  13   2    7.75    0.74   0
  10  15   3    3.33    0.84   0
  10  17   4    1.37    1.04   0
  10  18   5    1.00    0.96   0
  11  -4   1    4.57    0.49   0
  11   8   1    6.56    0.80   0
  11   9   1    0.90    0.83   0
  11  11   2    5.70    0.78   0
  11  12   2    7.73    0.96   0
  11  16   4    1.13    1.10   0
  11  17   5   -0.10    1.02   0
  12  -5   2    2.79    0.58   0
  12   1   1    1.84    0.65   0
  12   2   1    2.94    0.71   0
  12   3   1   19.85    0.80   0
  12   4   1   12.43    0.78   0
  12   9   2    0.22    0.96   0
  12  12   3    7.62    1.13   0
  12  14   4    3.95    1.16   0
  13  -5   3    9.34    0.63   0
  13   0   2    7.23    0.75   0
  13   1   2    2.34    0.78   0
  13   2   2   18.33    0.85   0
  13   3   2    7.95    0.85   0
  13   4   2    5.01    0.92   0
  13   9   3    1.35    1.09   0
  13  12   4    3.89    1.24   0
  14  -8   5    0.12    0.69   0
  14  -5   4    0.76    0.77   0
  14   0   3    0.86    0.89   0
  14   1   3    4.82    0.86   0
  14   2   3    2.12    0.94   0
  14   3   3    2.95    0.92   0
 -10  -4  20    4.12    0.97   0
 -10  -3  20    1.45    0.89   0
 -10  -2  19    0.11    0.85   0
 -10  -1  19    0.37    0.82   0
 -10   0  19    4.68    0.79   0
 -10   1  19    0.27    0.83   0
 -10   2  19    4.82    0.80   0
 -10   3  19   -0.32    0.69   0
  -9 -10  20    3.94    1.07   0
  -9  -9  19    0.70    0.97   0
  -9  -8  18    1.99    0.94   0
  -9  -7  17    4.90    0.83   0
  -9  -5  16    1.80    0.76   0
  -9  -3  15   -0.14    0.66   0
  -9  -2  15    8.32    0.67   0
  -9   5  15    0.97    0.51   0
  -9   7  16    1.27    0.53   0
  -8 -13  19    2.75    1.05   0
  -8  -9  15    2.86    0.78   0
  -8  -8  14    3.60    0.61   0
  -8  -6  13   24.16    0.70   0
  -8  -3  12    4.80    0.56   0
  -8   6  12    3.37    0.38   0
  -8  15  17    0.06    0.07   0
  -7 -16  19    2.28    1.14   0
  -7 -14  16    1.26    0.76   0
  -7 -13  15    2.95    0.70   0
  -7 -12  14    8.12    0.67   0
  -7  -9  12    1.17    0.54   0
  -7  -7  11    1.99    0.60   0
  -7  -5  10   14.54    0.47   0
  -7  -1   9    1.00    0.39   0
  -7   0   9   22.27    0.43   0
  -7   1   9   18.78    0.44   0
  -7   2   9   22.11    0.42   0
  -7   3   9    2.76    0.36   0
  -7   4   9   10.95    0.34   0
  -7  10  11    1.53    0.27   0
  -6 -18  18    5.97    0.93   0
  -6 -17  17    1.08    0.98   0
  -6 -16  16    2.56    0.91   0
  -6 -12  12   51.08    0.81   0
  -6 -11  11   -0.80    0.53   0
  -6  -9  10    3.31    0.57   0
  -6  -5   8    1.77    0.37   0
  -6  -1   7   63.53    0.44   0
  -6   0   7   11.98    0.36   0
  -6   1   7   10.72    0.36   0
  -6   3   7   10.50    0.30   0
  -6   4   7    6.08    0.27   0
  -5 -19  17    1.10    1.03   0
  -5 -18  16   -0.61    0.92   0
  -5 -16  13    4.26    0.67   0
  -5 -15  12    1.87    0.63   0
  -5 -12  10    0.65    0.62   0
  -5 -11   9    8.49    0.47   0
  -5  -9   8   14.70    0.54   0
  -5  -7   7   24.06    0.41   0
  -5  -4   6   36.98    0.43   0
  -4 -21  18    0.51    1.11   0
  -4 -20  16    0.16    0.86   0
  -4 -19  15    3.15    0.93   0
  -4 -13   9    6.17    0.59   0
  -4 -12   8   14.59    0.48   0
  -4 -10   7   45.24    0.56   0
  -4  -8   6  227.83    0.71   0
  -4  -1   4   21.20    0.29   0
  -3 -22  17    0.29    1.05   0
  -3 -20  14   -0.22    0.75   0
  -3 -19  13    7.55    0.84   0
  -3 -18  12    3.33    0.74   0
  -3 -15   9   27.48    0.67   0
  -3 -14   8   31.39    0.53   0
  -2 -22  15    1.95    0.83   0
  -2 -21  14    0.95    0.88   0
  -2 -14   7  185.70    0.83   0
  -2 -11   5   28.18    0.39   0
  -2  -9   4   42.16    0.38   0
  -1 -23  15   12.33    0.84   0
  -1 -22  14    2.14    0.91   0
  -1 -19  10   -0.22    0.53   0
  -1 -14   6    6.24    0.46   0
  -1  -6   2   27.96    0.30   0
  -1  -2   1   91.70    0.21   0
   0   6   0 1125.92    0.74   0
   2 -22  11   -0.04    0.65   0
   2 -21  10    0.73    0.60   0
   2 -14   4    2.29    0.35   0
   2   6  -1  165.97    0.47   0
   2  11   0  127.36    0.55   0
   2  16   2   55.18    0.60   0
   2  24   9    0.61    0.82   0
   3 -16   5   20.37    0.42   0
   3 -13   3   43.15    0.32   0
   3   8  -1   62.91    0.41   0
   3  12   0  215.29    0.72   0
   3  21   5    2.89    0.71   0
   3  22   6    2.47    0.75   0
   3  23   7    0.35    0.83   0
   3  24   8    1.70    0.95   0
   4  -4  -1   15.62    0.16   0
   4   9  -1   89.69    0.49   0
   4  13   0   22.69    0.55   0
   4  15   1    2.07    0.56   0
   4  17   2    4.50    0.67   0
   4  20   4    3.48    0.73   0
   4  21   5   -0.27    0.76   0
   4  22   6    0.76    0.68   0
   4  23   7   -0.29    0.88   0
   4  24   8    0.15    0.97   0
   5 -21   9    1.16    0.53   0
   5 -20   8    9.89    0.50   0
   5 -15   4    6.70    0.30   0
   5  10  -1   17.64    0.52   0
   5  13   0   39.11    0.65   0
   5  15   1    9.20    0.56   0
   5  17   2    0.82    0.58   0
   5  19   3   12.64    0.78   0
   5  20   4   19.10    0.83   0
   5  21   5   -0.50    0.72   0
   6 -15   4    6.88    0.27   0
   6  10  -1   20.89    0.59   0
   6  13   0   12.19    0.67   0
   6  15   1    6.23    0.59   0
   6  17   2    3.38    0.74   0
   6  20   4    0.81    0.90   0
   6  21   5    3.28    0.80   0
   6  22   6    0.67    0.84   0
   6  23   7   -0.11    0.89   0
   7  -4  -1  232.03    0.53   0
   7   9  -1    6.60    0.55   0
   7  15   1    3.04    0.78   0
   7  17   2   12.38    0.83   0
   7  20   4   -0.98    0.93   0
   7  21   5    2.22    1.02   0
   7  22   6    0.96    1.04   0
   8 -17   6    0.69    0.31   0
   8   7  -1  128.86    0.70   0
   8   8  -1    1.52    0.59   0
   8  12   0   23.13    0.78   0
   8  14   1   18.72    0.68   0
   8  16   2    0.73    0.72   0
   8  19   4    0.32    0.83   0
   9   0  -1   63.55    0.56   0
   9   1  -1    4.91    0.50   0
   9   2  -1   21.37    0.55   0
   9   3  -1   11.50    0.54   0
   9   4  -1   20.15    0.59   0
   9   5  -1   22.88    0.63   0
   9   6  -1   27.02    0.64   0
   9  10   0   36.48    0.68   0
   9  11   0   10.27    0.77   0
   9  13   1    1.59    0.67   0
   9  15   2    6.44    0.77   0
   9  17   3    0.02    0.80   0
   9  20   5    1.21    1.20   0
  10  -7   1    2.32    0.39   0
  10  -3   0   16.26    0.47   0
  10   8   0   11.72    0.64   0
  10   9   0    5.09    0.77   0
  10  12   1    3.83    0.85   0
  10  14   2    0.05    0.74   0
  10  16   3    1.35    0.83   0
  10  19   5    1.04    1.01   0
  11  -8   2   11.10    0.43   0
  11  -5   1   16.93    0.53   0
  11   0   0   25.74    0.68   0
  11   1   0   14.21    0.63   0
  11   2   0   54.65    0.75   0
  11   3   0    3.91    0.66   0
  11   4   0    3.51    0.67   0
  11   5   0    0.99    0.67   0
  11  10   1   15.58    0.93   0
  11  13   2   -0.92    1.03   0
  11  15   3    0.02    1.11   0
  11  17   4    1.87    1.12   0
  12 -11   4    2.24    0.40   0
  12  -6   2    7.12    0.56   0
  12  -2   1   24.48    0.72   0
  12  -1   1   19.53    0.69   0
  12   0   1   14.07    0.67   0
  12   5   1   10.53    0.80   0
  12   6   1    3.16    0.83   0
  12   7   1   17.30    0.88   0
  12  10   2    1.62    0.81   0
  12  11   2    0.95    0.97   0
  12  13   3    0.03    1.08   0
  13 -11   5    1.23    0.51   0
  13  -9   4    3.60    0.56   0
  13  -6   3    2.90    0.65   0
  13  -2   2   62.00    0.81   0
  13  -1   2    7.20    0.72   0
  13   5   2    3.90    0.79   0
  13   6   2   14.61    0.96   0
  13   7   2    2.48    1.01   0
  13  10   3    1.52    0.92   0
  13  11   3    0.62    1.07   0
  14  -6   4    3.82    0.74   0
  14  -2   3    2.75    0.88   0
  14  -1   3    0.07    0.82   0
  14   4   3    2.89    0.85   0
  14   5   3    2.56    1.01   0
  14   6   3    5.46    1.09   0
  14   7   3    4.16    1.08   0
 -10  -2  20    0.40    0.89   0
 -10  -1  20    0.69    0.84   0
 -10   0  20    1.66    0.83   0
 -10   1  20    1.10    0.81   0
  -9  -9  20    1.36    1.08   0
  -9  -8  19    0.02    0.97   0
  -9  -7  18    7.45    0.92   0
  -9  -6  17    3.03    0.80   0
  -9  -5  17    5.58    0.77   0
  -9  -4  16    0.91    0.69   0
  -9  -3  16    2.22    0.70   0
  -9  -1  15    6.66    0.62   0
  -9   0  15    9.75    0.61   0
  -9   2  15    0.46    0.52   0
  -9   3  15    0.75    0.49   0
  -9   4  15    3.57    0.48   0
  -9   6  16    2.53    0.57   0
  -9   8  17    0.31    0.55   0
  -8 -13  20    0.48    1.14   0
  -8 -12  18    1.42    0.83   0
  -8 -12  19    7.24    1.04   0
  -8 -11  17    3.22    0.77   0
  -8 -10  16    6.45    0.73   0
  -8  -8  15    3.10    0.76   0
  -8  -7  14    6.83    0.60   0
  -8  -5  13    3.98    0.53   0
  -8  -4  13   14.19    0.63   0
  -8  -2  12    2.06    0.50   0
  -8  -1  12    5.08    0.51   0
  -8   0  12   10.20    0.55   0
  -8   4  12   23.41    0.47   0
  -8   5  12    1.55    0.40   0
  -8   8  13    7.17    0.40   0
  -8  10  14   26.95    0.41   0
  -7 -15  18    0.13    0.87   0
  -7 -15  19   -0.79    1.05   0
  -7 -14  17   17.34    0.85   0
  -7 -13  16   16.95    0.89   0
  -7 -12  15   14.04    0.84   0
  -7 -11  14    0.29    0.62   0
  -7 -10  13   14.96    0.62   0
  -7  -8  12   -0.41    0.65   0
  -7  -6  11   42.66    0.65   0
  -7  -4  10    4.80    0.43   0
  -7  -3  10    6.79    0.48   0
  -7  14  14    3.23    0.27   0
  -6 -18  19    3.19    0.95   0
  -6 -17  18   -0.49    1.05   0
  -6 -15  15    2.82    0.76   0
  -6 -14  14   10.34    0.71   0
  -6 -13  13    1.78    0.63   0
  -6 -10  11    8.58    0.66   0
  -6  -7   9    6.22    0.45   0
  -6  -4   8   11.56    0.44   0
  -6   2   7    2.10    0.28   0
  -6   8   8    3.12    0.22   0
  -5 -19  18    0.11    1.08   0
  -5 -17  15    8.88    0.75   0
  -5 -16  14   23.17    0.89   0
  -5 -15  13   -0.79    0.76   0
  -5 -14  12    1.20    0.73   0
  -5 -13  11   14.20    0.59   0
  -5 -10   9    3.96    0.55   0
  -5  -6   7   63.00    0.52   0
  -5  -3   6    5.90    0.37   0
  -4 -20  17    0.67    1.07   0
  -4 -18  14   10.77    0.74   0
  -4 -17  13    0.66    0.76   0
  -4 -16  12    3.59    0.75   0
  -4 -15  11   57.68    0.80   0
  -4 -14  10   11.28    0.55   0
  -4 -11   8   12.58    0.54   0
  -4  -5   5    7.59    0.33   0
  -4   0   4    5.62    0.23   0
  -4   5   4   69.10    0.20   0
  -3 -21  16    1.55    0.82   0
  -3 -20  15    2.87    0.96   0
  -3 -17  11   21.40    0.62   0
  -3 -12   7   18.07    0.45   0
  -3 -10   6  132.31    0.63   0
  -3  -8   5  145.64    0.60   0
  -3  -2   3   54.49    0.28   0
  -2 -22  16    1.38    1.03   0
  -2 -20  13    3.89    0.78   0
  -2  -6   3  152.51    0.43   0
  -1 -23  16   -0.71    1.03   0
  -1 -15   7    3.19    0.48   0
  -1   8   1   87.71    0.28   0
  -1  12   2   18.34    0.31   0
   0 -24  16    6.72    0.88   0
   0 -15   6    1.73    0.44   0
   0 -12   4  105.24    0.49   0
   0 -10   3   15.04    0.33   0
   1 -21  11    5.35    0.69   0
   1 -17   7   20.26    0.50   0
   1  10   0   11.95    0.33   0
   1  21   6    5.74    0.64   0
   1  23   8    3.83    0.71   0
   1  24   9    3.51    0.86   0
   2  -8   1   54.43    0.23   0
   2   7  -1   53.42    0.34   0
   2  18   3    1.72    0.55   0
   2  22   6    9.29    0.73   0
   2  23   7    0.75    0.70   0
   3 -17   6    2.37    0.42   0
   3 -11   2   23.73    0.24   0
   3  -3  -1    0.86    0.11   0
   3   9  -1   30.23    0.38   0
   3  13   0   57.26    0.56   0
   3  15   1   33.39    0.50   0
   3  17   2    6.07    0.57   0
   3  20   4   10.18    0.71   0
   4 -23  12    0.91    0.78   0
   4  10  -1   15.49    0.39   0
   4  16   1    2.51    0.57   0
   4  19   3    7.39    0.69   0
   5   2  -2  555.41    0.80   0
   5   3  -2   67.34    0.46   0
   5   4  -2   41.99    0.45   0
   5   5  -2   11.84    0.41   0
   5  11  -1   23.77    0.56   0
   5  14   0   48.60    0.69   0
   5  16   1    2.39    0.69   0
   5  18   2   11.81    0.77   0
   5  22   5    0.77    0.88   0
   5  23   6   -0.47    0.97   0
   5  24   7    1.37    1.01   0
   6  -8   0   49.59    0.15   0
   6   2  -2   19.54    0.40   0
   6   3  -2   21.61    0.43   0
   6   4  -2  372.39    0.81   0
   6   5  -2    2.54    0.44   0
   6  11  -1   37.41    0.63   0
   6  14   0   59.96    0.81   0
   6  16   1   12.47    0.73   0
   6  18   2    5.67    0.79   0
   6  19   3    0.26    0.69   0
   6  22   5    1.85    0.95   0
   6  23   6    0.11    1.09   0
   7 -16   5    2.63    0.29   0
   7  10  -1   12.13    0.50   0
   7  13   0    3.00    0.59   0
   7  16   1    6.39    0.77   0
   7  19   3    0.68    0.88   0
   8  -7   0    5.11    0.27   0
   8  -3  -1   12.65    0.34   0
   8   9  -1   27.78    0.57   0
   8  13   0    6.51    0.77   0
   8  15   1    3.94    0.68   0
   8  17   2    5.63    0.89   0
   8  20   4   13.34    1.11   0
   8  21   5    1.30    0.94   0
   9 -11   2    2.66    0.19   0
   9  -6   0   56.95    0.44   0
   9  -2  -1    7.78    0.46   0
   9  -1  -1    5.43    0.43   0
   9   7  -1   17.88    0.57   0
   9   8  -1    7.70    0.69   0
   9  12   0    2.41    0.80   0
   9  14   1    1.20    0.70   0
   9  16   2    1.40    0.77   0
   9  18   3    2.14    0.97   0
  10 -12   3   11.27    0.22   0
  10 -10   2   32.10    0.35   0
  10  -4   0   56.93    0.55   0
  10  10   0    1.80    0.80   0
  10  13   1    4.91    0.87   0
  10  15   2    3.42    0.81   0
  10  17   3    1.38    1.04   0
  11  -6   1   20.03    0.52   0
  11  -1   0    9.30    0.57   0
  11   6   0    4.80    0.63   0
  11   7   0    4.19    0.81   0
  11  11   1    3.65    0.90   0
  11  16   3    9.71    1.17   0
  12 -13   5    0.88    0.34   0
  12  -9   3    8.69    0.47   0
  12  -3   1    8.81    0.65   0
  12   8   1   29.16    0.94   0
  12   9   1    4.10    0.92   0
  12  12   2   21.61    1.16   0
  12  14   3    3.34    0.97   0
  13  -7   3    4.15    0.64   0
  13  -4   2    4.76    0.69   0
  13  -3   2   10.40    0.68   0
  13   8   2    0.22    0.85   0
  13   9   2    2.39    1.07   0
  13  12   3    0.55    1.18   0
  14  -7   4    0.05    0.73   0
  14  -3   3    1.29    0.75   0
  -9  -8  20    0.18    1.04   0
  -9  -7  19    1.38    0.93   0
  -9  -6  18   -0.40    0.82   0
  -9  -5  18    1.44    0.78   0
  -9  -4  17    2.87    0.76   0
  -9  -2  16    5.01    0.68   0
  -9  -1  16    2.77    0.65   0
  -9   0  16   10.02    0.71   0
  -9   4  16    2.19    0.58   0
  -9   5  16    3.29    0.56   0
  -9   7  17    1.34    0.56   0
  -9   9  18    2.16    0.56   0
  -8 -12  20    7.02    1.11   0
  -8 -11  18    2.08    0.83   0
  -8 -10  17    0.30    0.75   0
  -8  -9  16    3.61    0.70   0
  -8  -8  16   14.53    0.79   0
  -8  -7  15    1.86    0.74   0
  -8  -6  14   36.57    0.65   0
  -8  -5  14    0.89    0.66   0
  -8  -3  13    7.18    0.59   0
  -8   1  12    6.71    0.48   0
  -8   2  12    2.36    0.43   0
  -8   3  12   10.50    0.43   0
  -8   7  13    2.10    0.42   0
  -8  13  17    0.46    0.42   0
  -7 -15  20    7.37    1.16   0
  -7 -14  18    0.12    0.83   0
  -7 -13  17    0.85    0.92   0
  -7 -12  16   22.03    0.93   0
  -7 -11  15    3.53    0.80   0
  -7 -10  14    3.75    0.73   0
  -7  -9  13    4.04    0.55   0
  -7  -7  12   21.93    0.67   0
  -7  -5  11   10.56    0.57   0
  -7  -2  10   26.44    0.50   0
  -7   7  10   14.79    0.33   0
  -6 -17  19    1.06    1.03   0
  -6 -16  17   18.09    0.85   0
  -6 -15  16   -0.42    0.74   0
  -6 -14  15   22.48    0.91   0
  -6 -13  14    2.28    0.77   0
  -6 -12  13    7.93    0.78   0
  -6 -11  12   17.08    0.60   0
  -6  -8  10   73.76    0.62   0
  -6  -6   9   24.87    0.47   0
  -6  -3   8    2.48    0.41   0
  -5 -19  19    2.24    1.11   0
  -5 -18  17    1.28    0.81   0
  -5 -17  16    1.02    0.90   0
  -5 -16  15    6.72    0.85   0
  -5 -12  11    2.86    0.64   0
  -5 -11  10    3.77    0.57   0
  -5  -8   8  307.18    0.85   0
  -5  -2   6   68.29    0.44   0
  -4 -20  18    9.80    1.15   0
  -4 -19  16   -0.05    0.82   0
  -4 -18  15    2.35    0.91   0
  -4 -12   9    4.42    0.56   0
  -4  -9   7    8.09    0.38   0
  -4  -7   6   27.17    0.39   0
  -4  -4   5  223.53    0.60   0
  -4   1   4  110.79    0.32   0
  -4   2   4   70.32    0.28   0
  -4   3   4   30.08    0.23   0
  -4   4   4  125.42    0.28   0
  -3 -21  17    0.78    0.88   0
  -3 -19  14   -0.31    0.70   0
  -3 -18  13    3.16    0.79   0
  -3 -17  12    3.62    0.72   0
  -3 -15  10    3.04    0.65   0
  -3 -14   9   15.38    0.59   0
  -3 -13   8    2.99    0.44   0
  -3  -5   4   67.71    0.42   0
  -3  -1   3    0.73    0.22   0
  -3  12   4   36.29    0.23   0
  -2 -22  17   -1.76    1.09   0
  -2 -21  15    4.32    0.78   0
  -2 -20  14    9.96    0.84   0
  -2 -13   7   23.05    0.52   0
  -2 -10   5   23.14    0.44   0
  -2  -8   4  145.86    0.53   0
  -2  -2   2  604.07    0.56   0
  -2   9   2   18.96    0.20   0
  -1 -23  17   -0.42    1.07   0
  -1 -22  15    3.01    0.91   0
  -1 -16   8    1.68    0.45   0
  -1 -10   4  141.93    0.53   0
  -1  -8   3   65.95    0.39   0
   0 -19  10    0.67    0.62   0
   0 -18   9    6.47    0.59   0
   0 -17   8    1.08    0.52   0
   0 -13   5   12.75    0.39   0
   0   7   0    2.44    0.20   0
   1 -19   9    2.77    0.55   0
   1  16   2   19.07    0.48   0
   2 -22  12    7.17    0.72   0
   2 -12   3   15.69    0.27   0
   2 -10   2   82.34    0.31   0
   2  -5   0  178.49    0.17   0
   2  -1  -1    4.89    0.14   0
   2   8  -1   42.18    0.34   0
   2  12   0   12.61    0.35   0
   2  17   2    6.56    0.55   0
   2  20   4    2.57    0.64   0
   2  21   5    1.05    0.61   0
   2  24   8    2.14    0.82   0
   3 -24  14    4.13    0.85   0
   3 -19   8    0.58    0.51   0
   3 -18   7    6.79    0.49   0
   3  10  -1    1.22    0.34   0
   3  16   1    8.17    0.58   0
   3  22   5    6.76    0.75   0
   3  23   6    1.43    0.82   0
   3  24   7    1.23    0.82   0
   4 -22  11    0.61    0.67   0
   4 -16   5   29.83    0.41   0
   4 -13   3   11.18    0.25   0
   4   2  -2  147.64    0.44   0
   4   3  -2    4.75    0.33   0
   4   4  -2  501.72    0.77   0
   4   5  -2  214.50    0.61   0
   4  11  -1   27.85    0.43   0
   4  14   0   71.77    0.60   0
   4  18   2    5.47    0.57   0
   4  21   4    0.87    0.77   0
   4  22   5    1.36    0.82   0
   4  23   6    0.77    0.87   0
   4  24   7   -0.47    0.90   0
   5 -23  12    0.01    0.70   0
   5   1  -2   26.50    0.35   0
   5   6  -2  326.49    0.74   0
   5   7  -2   14.67    0.46   0
   5  12  -1    2.60    0.55   0
   5  20   3    5.76    0.81   0
   5  21   4    2.73    0.72   0
   6 -23  12   -0.43    0.68   0
   6  -5  -1   70.76    0.28   0
   6   0  -2  109.82    0.45   0
   6   1  -2    8.47    0.35   0
   6   6  -2   12.50    0.38   0
   6   7  -2   12.57    0.47   0
   6  12  -1   26.76    0.64   0
   6  17   1   -0.01    0.73   0
   6  21   4    1.45    0.75   0
   7   1  -2   18.42    0.40   0
   7   2  -2  115.51    0.56   0
   7   3  -2   10.24    0.36   0
   7   4  -2   38.33    0.43   0
   7   5  -2   10.18    0.39   0
   7   6  -2   46.38    0.54   0
   7  11  -1    9.48    0.53   0
   7  14   0    0.18    0.60   0
   7  18   2    3.47    0.73   0
   7  20   3    0.76    0.95   0
   7  21   4    0.84    0.96   0
   7  22   5    1.87    0.91   0
   8 -21  10    3.55    0.52   0
   8 -18   7    3.04    0.36   0
   8  -4  -1   20.41    0.35   0
   8  10  -1    5.37    0.57   0
   8  11  -1    7.13    0.70   0
   8  14   0   -0.10    0.79   0
   8  16   1   33.80    0.91   0
   8  19   3    1.87    0.86   0
   9  -9   1   11.02    0.29   0
   9   9  -1   19.30    0.72   0
   9  13   0    1.52    0.81   0
   9  15   1    3.53    0.75   0
   9  17   2    5.65    0.80   0
   9  20   4    1.15    0.96   0
  10  -8   1   22.83    0.40   0
  10  -5   0   14.77    0.48   0
  10   0  -1    1.73    0.50   0
  10   1  -1    7.23    0.54   0
  10   2  -1   10.78    0.57   0
  10   3  -1    8.84    0.51   0
  10   4  -1    2.22    0.51   0
  10   5  -1   -0.06    0.63   0
  10   6  -1    5.51    0.70   0
  10   7  -1    3.35    0.71   0
  10  11   0    0.54    0.68   0
  10  16   2    5.75    0.83   0
  10  19   4    1.16    1.00   0
  11 -17   7    0.01    0.02   0
  11 -11   3   17.51    0.36   0
  11  -9   2    2.79    0.41   0
  11  -3   0    1.64    0.57   0
  11  -2   0   28.94    0.60   0
  11   8   0    1.91    0.67   0
  11   9   0    4.21    0.85   0
  11  12   1    6.07    0.79   0
  11  13   1    1.88    0.96   0
  11  15   2    4.91    1.13   0
  12  -7   2    6.82    0.54   0
  12  -4   1    1.79    0.60   0
  12   2   0    3.04    0.76   0
  12   3   0    5.17    0.71   0
  12   4   0   11.09    0.75   0
  12  10   1    8.97    1.04   0
  12  13   2   -1.30    1.08   0
  12  15   3    0.88    1.03   0
  13   0   1    4.20    0.80   0
  13   1   1    5.40    0.77   0
  13   2   1    1.76    0.79   0
  13   3   1    5.82    0.82   0
  13   4   1    1.24    0.88   0
  13   5   1   13.67    0.95   0
  13   6   1    1.65    0.90   0
  13  10   2   17.17    0.95   0
  13  11   2    2.11    1.08   0
  14  -4   3    2.53    0.72   0
  14   0   2    6.20    0.89   0
  14   1   2    0.50    0.87   0
  14   2   2    0.62    0.90   0
  14   3   2    1.57    0.94   0
  14   4   2    7.83    1.01   0
  14   5   2    4.10    1.04   0
  14   6   2    0.58    1.03   0
  -9  -8  21   -0.10    1.01   0
  -9  -7  20    8.13    0.98   0
  -9  -6  19   -0.16    0.89   0
  -9  -4  18    0.08    0.80   0
  -9  -3  17    5.04    0.70   0
  -9  -2  17    2.81    0.71   0
  -9   1  16    2.06    0.57   0
  -9   3  16    0.27    0.53   0
  -9   6  17    0.95    0.58   0
  -9   8  18    4.38    0.61   0
  -8 -12  21    2.54    1.15   0
  -8 -11  19    0.72    0.85   0
  -8 -11  20    0.19    1.01   0
  -8 -10  18    0.05    0.76   0
  -8  -9  17    0.26    0.70   0
  -8  -6  15   10.90    0.74   0
  -8  -4  14    5.72    0.64   0
  -8  -2  13    5.29    0.54   0
  -8  -1  13    8.89    0.53   0
  -8   6  13    1.70    0.45   0
  -8   9  14    0.17    0.38   0
  -7 -14  19    4.52    0.88   0
  -7 -13  18    0.19    0.97   0
  -7 -12  17    3.85    0.89   0
  -7  -9  14   18.87    0.77   0
  -7  -8  13   10.66    0.65   0
  -7  -6  12    6.23    0.61   0
  -7  -4  11    4.41    0.54   0
  -7  -1  10    2.51    0.43   0
  -7   0  10    6.44    0.40   0
  -7   6  10    4.94    0.35   0
  -7   9  11    0.56    0.32   0
  -7  11  12    1.21    0.31   0
  -6 -17  20    1.58    0.96   0
  -6 -16  18   -0.18    0.82   0
  -6 -15  17    4.33    0.94   0
  -6 -14  16    4.26    0.87   0
  -6 -10  12    5.03    0.67   0
  -6  -9  11    0.85    0.51   0
  -6  -7  10   17.70    0.58   0
  -6  -5   9    7.90    0.46   0
  -6  -2   8   66.89    0.48   0
  -5 -18  18    1.36    0.88   0
  -5 -17  17    1.71    0.94   0
  -5 -15  14    1.59    0.66   0
  -5 -14  13   23.14    0.68   0
  -5 -13  12    4.35    0.57   0
  -5  -9   9   11.43    0.46   0
  -5  -7   8   13.05    0.50   0
  -5  -5   7   10.97    0.35   0
  -5  -1   6   96.33    0.45   0
  -5   7   6   19.09    0.19   0
  -5  18  11    8.21    0.25   0
  -4 -20  19    4.61    1.16   0
  -4 -19  17    0.37    0.95   0
  -4 -17  14   -0.09    0.65   0
  -4 -16  13    0.78    0.74   0
  -4 -15  12   20.21    0.77   0
  -4 -14  11    0.66    0.63   0
  -4 -13  10    0.76    0.51   0
  -4 -10   8  152.77    0.74   0
  -4  -6   6    9.31    0.41   0
  -3 -21  18   -0.80    1.04   0
  -3 -20  16   10.84    0.84   0
  -3 -19  15   13.45    0.94   0
  -3 -16  11    1.39    0.57   0
  -3 -11   7   22.82    0.42   0
  -3  -9   6   81.80    0.54   0
  -3  -7   5    9.28    0.41   0
  -2 -22  18    3.03    1.09   0
  -2 -21  16    0.09    0.96   0
  -2  -5   3   57.95    0.36   0
  -1 -22  16    0.64    1.00   0
  -1 -21  14    0.97    0.70   0
  -1 -13   6    6.54    0.42   0
  -1  -5   2  149.45    0.38   0
  -1   9   1   34.94    0.26   0
  -1  17   4    7.45    0.43   0
   0   8   0  780.71    0.72   0
   1  14   1   78.57    0.52   0
   1  22   6    0.65    0.66   0
   1  23   7    2.48    0.69   0
   1  24   8    0.05    0.82   0
   2 -21  11    5.54    0.65   0
   2 -20  10    9.56    0.60   0
   2   9  -1   30.14    0.40   0
   2  13   0   17.11    0.45   0
   2  19   3   20.31    0.62   0
   3 -23  13    1.94    0.71   0
   3 -14   4   22.62    0.34   0
   3  11  -1    2.84    0.42   0
   3  14   0   10.44    0.42   0
   3  18   2    1.14    0.52   0
   3  20   3   16.65    0.69   0
   3  21   4    0.48    0.73   0
   4 -21  10    0.00    0.55   0
   4 -20   9    4.27    0.56   0
   4 -19   8    7.06    0.50   0
   4 -18   7    1.89    0.43   0
   4 -17   6   18.26    0.41   0
   4   1  -2    2.50    0.25   0
   4   6  -2   42.55    0.40   0
   4   7  -2   41.79    0.48   0
   4  12  -1    3.77    0.49   0
   4  15   0    2.32    0.57   0
   4  17   1    0.47    0.65   0
   4  19   2   -0.31    0.66   0
   4  20   3    2.35    0.62   0
   5 -22  11    0.76    0.64   0
   5 -16   5    5.64    0.33   0
   5  -5  -1   75.18    0.21   0
   5   0  -2    1.48    0.27   0
   5   8  -2   28.77    0.41   0
   5  13  -1   52.10    0.65   0
   5  15   0   35.99    0.62   0
   5  17   1    7.11    0.60   0
   5  19   2   -0.59    0.74   0
   5  22   4   -0.69    0.86   0
   5  23   5    0.05    0.95   0
   5  24   6    3.26    1.04   0
   6 -22  11    0.98    0.61   0
   6 -16   5    7.45    0.32   0
   6  -1  -2   10.58    0.34   0
   6   8  -2  121.17    0.61   0
   6   9  -2    0.96    0.51   0
   6  15   0   11.55    0.62   0
   6  19   2    0.09    0.67   0
   6  22   4    8.18    1.01   0
   6  23   5   -0.12    1.10   0
   7 -21  10   -0.21    0.54   0
   7 -13   3    2.34    0.17   0
   7  -8   0  167.77    0.30   0
   7  -5  -1    9.29    0.26   0
   7   0  -2   60.97    0.44   0
   7   7  -2   15.65    0.44   0
   7   8  -2    4.50    0.52   0
   7  12  -1   10.67    0.57   0
   7  15   0    2.45    0.64   0
   7  17   1    3.06    0.70   0
   7  22   4    0.17    1.04   0
   7  23   5    2.09    1.18   0
   8 -19   8    3.97    0.39   0
   8   1  -2    8.60    0.44   0
   8   2  -2   70.38    0.55   0
   8   3  -2    7.09    0.39   0
   8   4  -2    9.29    0.41   0
   8   5  -2   16.05    0.45   0
   8   6  -2    7.98    0.55   0
   8   7  -2   19.79    0.59   0
   8  12  -1   22.14    0.76   0
   8  15   0    9.38    0.84   0
   8  17   1   -0.90    0.88   0
   8  20   3   -0.81    0.91   0
   9 -15   5    3.41    0.21   0
   9  -3  -1   34.92    0.43   0
   9  10  -1   42.33    0.68   0
   9  11  -1    3.56    0.77   0
   9  14   0    9.21    0.88   0
   9  16   1    0.63    0.80   0
   9  18   2    0.63    0.96   0
  10  -1  -1    1.11    0.48   0
  10   8  -1   39.61    0.70   0
  10   9  -1    4.60    0.78   0
  10  12   0   11.28    0.74   0
  10  13   0   11.56    0.89   0
  10  15   1    3.10    0.80   0
  10  17   2    3.72    0.88   0
  11   4  -1    2.03    0.65   0
  11  10   0    7.23    0.74   0
  11  11   0    1.01    0.94   0
  12  -5   1    3.63    0.61   0
  12   0   0    1.82    0.65   0
  12   1   0    5.96    0.69   0
  12   5   0    6.28    0.68   0
  12   6   0   16.56    0.84   0
  12   7   0    8.54    0.87   0
  12   8   0    0.26    0.87   0
  12  11   1   -0.40    0.84   0
  12  12   1    1.63    1.07   0
  12  14   2    2.28    0.97   0
  13 -10   4    0.63    0.52   0
  13  -8   3    3.45    0.59   0
  13  -5   2    1.93    0.64   0
  13  -1   1    2.27    0.69   0
  13   7   1    5.23    0.84   0
  13   8   1    2.44    1.04   0
  13   9   1    0.34    1.01   0
  13  12   2    1.39    1.19   0
  14  -8   4    0.30    0.66   0
  14  -5   3    0.36    0.74   0
  14  -2   2    3.79    0.87   0
  14  -1   2    5.32    0.80   0
  14   7   2    1.08    0.93   0
  14   8   2    3.84    1.17   0
  -9  -7  21    0.75    0.88   0
  -9  -6  20    4.32    0.80   0
  -9  -6  21    1.87    0.97   0
  -9  -5  19    1.40    0.73   0
  -9  -5  20    3.32    0.89   0
  -9  -4  19    1.09    0.85   0
  -9  -3  18    2.57    0.76   0
  -9  -2  18    2.41    0.74   0
  -9  -1  17    4.00    0.67   0
  -9   0  17    6.95    0.67   0
  -9   1  17    8.57    0.63   0
  -9   2  17    1.49    0.68   0
  -9   3  17    2.96    0.66   0
  -9   4  17   -0.49    0.64   0
  -9   5  17    0.70    0.59   0
  -9   7  18   -0.25    0.59   0
  -8 -11  21    1.48    1.10   0
  -8 -10  19    1.11    0.81   0
  -8 -10  20    0.21    0.98   0
  -8  -9  18    5.41    0.76   0
  -8  -8  17    1.17    0.69   0
  -8  -7  16    5.16    0.65   0
  -8  -6  16    3.71    0.72   0
  -8  -5  15    2.64    0.67   0
  -8  -3  14    2.81    0.61   0
  -8   0  13    6.05    0.51   0
  -8   1  13   14.39    0.51   0
  -8   2  13   26.23    0.59   0
  -8   3  13    6.78    0.52   0
  -8   4  13   18.90    0.50   0
  -8   5  13    0.23    0.44   0
  -8   8  14    2.37    0.42   0
  -7 -14  20    5.49    0.96   0
  -7 -14  21    1.94    1.17   0
  -7 -13  19    0.77    1.01   0
  -7 -12  18    1.52    0.90   0
  -7 -11  16    1.30    0.69   0
  -7 -10  15    4.51    0.63   0
  -7  -8  14   18.36    0.72   0
  -7  -7  13    1.28    0.65   0
  -7  -5  12    4.82    0.56   0
  -7  -3  11   49.32    0.60   0
  -7   1  10   12.75    0.40   0
  -7   2  10    9.82    0.37   0
  -7   3  10   19.25    0.41   0
  -7   4  10   26.83    0.41   0
  -7   5  10    3.29    0.34   0
  -6 -16  19   -0.69    0.86   0
  -6 -16  20    6.89    1.13   0
  -6 -15  18    2.58    0.91   0
  -6 -13  15   10.24    0.71   0
  -6 -12  14   21.97    0.68   0
  -6 -11  13   17.82    0.63   0
  -6  -8  11   27.54    0.61   0
  -6  -6  10    5.63    0.52   0
  -6  -4   9    9.81    0.46   0
  -6  -1   8    3.07    0.35   0
  -6   0   8   32.52    0.40   0
  -6   7   8    2.45    0.22   0
  -6  10   9   11.81    0.23   0
  -5 -18  19    0.59    0.91   0
  -5 -18  20    0.98    1.11   0
  -5 -17  18   -0.50    0.98   0
  -5 -16  16    7.01    0.74   0
  -5 -15  15    4.36    0.83   0
  -5 -14  14   53.51    0.88   0
  -5 -12  12   14.82    0.68   0
  -5 -11  11    9.65    0.64   0
  -5 -10  10   67.97    0.60   0
  -5  -8   9   16.20    0.54   0
  -5  -6   8   46.50    0.51   0
  -5  -4   7   17.04    0.41   0
  -5   0   6  122.81    0.45   0
  -5  19  12    1.85    0.27   0
  -4 -19  18    1.12    0.89   0
  -4 -18  16    9.48    0.80   0
  -4 -17  15    5.52    0.82   0
  -4 -16  14   43.16    0.86   0
  -4 -11   9   34.21    0.59   0
  -4  -8   7    3.91    0.36   0
  -4  -3   5   11.42    0.30   0
  -3 -21  19    1.26    0.94   0
  -3 -20  17    0.03    0.85   0
  -3 -18  14   21.75    0.74   0
  -3 -13   9    7.17    0.56   0
  -3 -12   8   14.56    0.45   0
  -3  -4   4  115.06    0.44   0
  -3   0   3   12.71    0.21   0
  -2 -21  17   -0.37    0.99   0
  -2 -20  15    0.07    0.84   0
  -2 -16  10   33.89    0.59   0
  -2 -15   9   -0.49    0.45   0
  -2 -11   6    5.77    0.35   0
  -2  -9   5  180.47    0.60   0
  -2  -1   2   23.05    0.22   0
  -2  13   3    4.20    0.26   0
  -1 -22  17    8.11    1.00   0
  -1 -15   8    6.46    0.52   0
  -1 -14   7   34.74    0.46   0
  -1 -11   5  142.59    0.57   0
  -1  -1   1    2.74    0.09   0
  -1  13   2   21.52    0.33   0
   0 -15   7    0.76    0.47   0
   0 -14   6   31.72    0.40   0
   0 -11   4    1.49    0.35   0
   0  -9   3   72.56    0.37   0
   0  19   4   10.02    0.56   0
   1 -20  11    0.24    0.66   0
   1 -19  10    0.34    0.60   0
   1 -16   7   37.04    0.52   0
   1 -15   6    5.37    0.39   0
   1   3  -1   25.33    0.23   0
   1   4  -1   15.40    0.25   0
   1   5  -1  171.18    0.39   0
   1   6  -1  329.09    0.52   0
   1  17   2   13.36    0.50   0
   1  20   4    2.44    0.56   0
   2 -13   4   27.17    0.37   0
   2  10  -1   19.71    0.40   0
   2  16   1   33.69    0.57   0
   2  18   2   29.43    0.60   0
   2  21   4    0.23    0.66   0
   2  22   5    7.07    0.71   0
   2  23   6    1.93    0.69   0
   2  24   7    1.94    0.80   0
   2  25   8    0.91    0.86   0
   3 -15   5   26.41    0.39   0
   3   4  -2    5.05    0.31   0
   3   5  -2  153.22    0.50   0
   3  12  -1   11.25    0.46   0
   3  15   0   18.13    0.55   0
   3  17   1    2.28    0.57   0
   3  19   2    4.94    0.63   0
   3  23   5    0.20    0.76   0
   3  24   6    0.57    0.80   0
   4 -11   2   67.86    0.26   0
   4   0  -2  240.84    0.44   0
   4   8  -2  215.80    0.63   0
   4   9  -2   55.16    0.51   0
   4  13  -1   93.03    0.67   0
   4  21   3   -0.36    0.75   0
   4  22   4    8.24    0.89   0
   4  23   5    0.06    0.84   0
   4  24   6   11.42    0.95   0
   5 -20   9    0.61    0.52   0
   5 -19   8    3.86    0.45   0
   5 -18   7    3.99    0.43   0
   5 -17   6   -0.20    0.35   0
   5 -13   3   98.55    0.34   0
   5  -1  -2    2.63    0.25   0
   5   9  -2   37.14    0.45   0
   5  10  -2  151.80    0.71   0
   5  16   0   34.48    0.71   0
   5  18   1    0.72    0.73   0
   5  21   3    2.86    0.81   0
   6 -21  10    3.18    0.55   0
   6 -20   9   -0.01    0.50   0
   6 -17   6    4.16    0.36   0
   6  10  -2   13.72    0.56   0
   6  14  -1    8.68    0.69   0
   6  16   0   12.67    0.62   0
   6  18   1    4.35    0.65   0
   6  21   3    1.18    0.75   0
   7 -20   9    0.18    0.49   0
   7 -19   8    0.99    0.44   0
   7 -18   7    9.29    0.40   0
   7 -17   6   -0.24    0.32   0
   7  -1  -2   37.41    0.38   0
   7   9  -2    1.62    0.45   0
   7  10  -2   31.01    0.65   0
   7  13  -1   19.37    0.63   0
   7  16   0   27.56    0.84   0
   7  18   1    5.29    0.82   0
   7  20   2   10.58    0.96   0
   7  21   3   -1.21    0.95   0
   8 -10   1    3.41    0.15   0
   8  -5  -1    1.79    0.30   0
   8   0  -2   57.75    0.50   0
   8   8  -2    6.83    0.49   0
   8   9  -2    3.07    0.62   0
   8  13  -1   14.81    0.77   0
   8  16   0   25.56    0.88   0
   8  19   2    1.07    0.83   0
   8  22   4   -0.38    1.11   0
   9  -7   0    8.49    0.33   0
   9  -4  -1    3.34    0.39   0
   9   1  -2   62.88    0.66   0
   9   2  -2   75.82    0.65   0
   9   3  -2    9.55    0.56   0
   9   4  -2   16.30    0.59   0
   9   5  -2    8.58    0.59   0
   9   6  -2    8.25    0.61   0
   9   7  -2   25.58    0.69   0
   9  12  -1   10.78    0.78   0
   9  15   0    3.87    0.91   0
   9  17   1   -0.17    0.92   0
   9  20   3   -0.96    0.97   0
  10  -6   0   16.62    0.43   0
  10  -2  -1    7.53    0.47   0
  10  10  -1    0.59    0.65   0
  10  11  -1   33.81    0.86   0
  10  16   1    2.28    0.84   0
  10  18   2    5.94    1.10   0
  11  -7   1   11.24    0.45   0
  11  -4   0    2.75    0.54   0
  11   0  -1   20.15    0.68   0
  11   1  -1    1.46    0.59   0
  11   2  -1    3.49    0.65   0
  11   3  -1    7.68    0.57   0
  11   5  -1    8.28    0.59   0
  11   6  -1   22.67    0.76   0
  11   7  -1   16.78    0.83   0
  11   8  -1   22.80    0.86   0
  11  12   0    7.40    0.94   0
  12 -10   3   -0.01    0.42   0
  12  -8   2   10.92    0.50   0
  12  -2   0    6.86    0.67   0
  12  -1   0    3.05    0.64   0
  12   9   0    0.85    0.89   0
  12  10   0   23.66    1.01   0
  12  13   1    2.91    1.14   0
  12  15   2    6.28    1.05   0
  13 -12   5    4.10    0.45   0
  13  -6   2   37.57    0.73   0
  13  -3   1    0.65    0.71   0
  13  -2   1    3.28    0.68   0
  13  10   1    3.31    1.13   0
  13  13   2    3.13    1.05   0
  14  -6   3    1.35    0.72   0
  14  -3   2   10.91    0.86   0
  -9  -5  21    0.07    0.98   0
  -9  -4  20    0.86    0.89   0
  -9  -3  19    0.49    0.82   0
  -9  -2  19    1.29    0.76   0
  -9  -1  18    0.75    0.71   0
  -9   0  18   15.81    0.74   0
  -9   1  18    1.22    0.74   0
  -9   5  18   -0.29    0.64   0
  -9   6  18    3.02    0.62   0
  -9   8  19    1.88    0.62   0
  -8 -10  21    3.78    1.07   0
  -8  -9  19    2.32    0.76   0
  -8  -8  18    2.36    0.82   0
  -8  -7  17    3.12    0.76   0
  -8  -5  16    1.26    0.68   0
  -8  -4  15   17.35    0.69   0
  -8  -2  14   12.30    0.58   0
  -8  -1  14    3.92    0.57   0
  -8   7  14    1.22    0.45   0
  -8  11  16    0.52    0.43   0
  -7 -13  20    2.10    1.03   0
  -7 -12  19    1.36    0.94   0
  -7 -11  17    8.83    0.74   0
  -7 -10  16    5.89    0.78   0
  -7  -9  15    1.83    0.61   0
  -7  -6  13   24.52    0.68   0
  -7  -4  12   10.15    0.56   0
  -7  -2  11   10.70    0.50   0
  -7   8  11    4.46    0.34   0
  -7  17  16   -0.00    0.03   0
  -6 -16  21    0.29    1.14   0
  -6 -15  19    3.33    0.96   0
  -6 -14  17   11.73    0.76   0
  -6 -13  16    5.54    0.72   0
  -6 -12  15   10.73    0.80   0
  -6 -11  14   -0.70    0.74   0
  -6 -10  13    2.08    0.65   0
  -6  -9  12   20.98    0.57   0
  -6  -7  11    8.62    0.57   0
  -6  -3   9    9.55    0.43   0
  -6   1   8   20.93    0.36   0
  -6   2   8  113.21    0.49   0
  -6   6   8   32.28    0.29   0
  -5 -17  19    0.19    1.04   0
  -5 -16  17    5.22    0.88   0
  -5 -15  16    3.71    0.84   0
  -5 -13  13    4.53    0.61   0
  -5  -9  10    0.27    0.54   0
  -5  -3   7   17.18    0.40   0
  -5   1   6    7.58    0.29   0
  -5   2   6   88.90    0.38   0
  -5   6   6  107.72    0.29   0
  -5  20  13    1.53    0.29   0
  -4 -19  19   -0.51    0.92   0
  -4 -18  17    0.54    0.78   0
  -4 -17  16    7.32    0.85   0
  -4 -15  13   18.15    0.65   0
  -4 -14  12   55.14    0.69   0
  -4 -13  11    8.78    0.54   0
  -4  -9   8    2.23    0.46   0
  -4  -7   7   14.25    0.43   0
  -4  -5   6   28.57    0.43   0
  -4  -2   5  193.52    0.52   0
  -3 -20  18    1.28    0.92   0
  -3 -19  16    4.39    0.81   0
  -3 -18  15    1.32    0.88   0
  -3 -16  12   41.51    0.65   0
  -3 -15  11   22.50    0.60   0
  -3 -14  10   14.57    0.53   0
  -3 -10   7   53.16    0.46   0
  -3   9   3   18.11    0.13   0
  -3  15   5    4.67    0.28   0
  -2 -21  18    0.85    1.02   0
  -2 -20  16    3.06    0.94   0
  -2 -19  14    1.97    0.67   0
  -2 -12   7   72.88    0.51   0
  -2  -7   4   40.89    0.35   0
  -2  10   2  105.87    0.28   0
  -1  -9   4   75.32    0.45   0
  -1  -7   3    4.99    0.29   0
  -1  10   1   21.04    0.27   0
   0 -18  10   50.67    0.63   0
   0 -17   9   13.45    0.57   0
   0 -16   8   94.86    0.68   0
   0   9   0    3.33    0.26   0
   0  22   6   15.71    0.67   0
   0  23   7    0.02    0.66   0
   0  24   8    7.97    0.74   0
   1 -18   9    1.74    0.51   0
   1 -17   8    2.12    0.47   0
   1  -6   1  360.25    0.40   0
   1  -3   0    6.09    0.08   0
   1   7  -1   90.40    0.37   0
   1  15   1   14.51    0.43   0
   1  19   3    3.57    0.52   0
   1  23   6    1.67    0.73   0
   1  24   7    1.24    0.79   0
   2 -23  15    3.37    0.89   0
   2 -21  12    2.47    0.68   0
   2  11  -1   23.06    0.42   0
   2  14   0   31.21    0.42   0
   2  20   3    5.72    0.63   0
   3 -23  14    0.31    0.79   0
   3 -16   6    9.14    0.42   0
   3 -12   3   56.70    0.33   0
   3   2  -2   59.65    0.31   0
   3   3  -2  136.77    0.39   0
   3   6  -2  120.26    0.44   0
   3   7  -2   49.47    0.38   0
   3   8  -2   53.64    0.45   0
   3  13  -1   73.38    0.57   0
   3  21   3    0.64    0.70   0
   3  22   4   -0.42    0.75   0
   3  25   7    0.60    0.89   0
   4 -22  12    9.21    0.70   0
   4 -14   4   14.07    0.31   0
   4  10  -2   37.65    0.50   0
   4  14  -1   15.02    0.58   0
   4  16   0   19.02    0.52   0
   4  18   1   18.06    0.60   0
   4  20   2    7.70    0.76   0
   4  24   5    0.01    0.88   0
   5  11  -2    7.86    0.53   0
   5  14  -1   32.75    0.57   0
   5  17   0    1.28    0.70   0
   5  19   1    6.39    0.75   0
   5  20   2    0.27    0.65   0
   5  22   3    0.68    0.84   0
   5  23   4    0.25    0.96   0
   5  24   5    3.14    1.03   0
   6 -19   8    1.58    0.42   0
   6 -18   7   10.60    0.42   0
   6 -13   3   25.27    0.23   0
   6  -2  -2   35.21    0.32   0
   6  11  -2    0.78    0.47   0
   6  15  -1    3.68    0.67   0
   6  17   0    0.91    0.74   0
   6  19   1    2.11    0.82   0
   6  23   4    1.92    1.08   0
   7  -2  -2    1.54    0.33   0
   7  11  -2    2.09    0.50   0
   7  14  -1   28.00    0.65   0
   7  17   0   11.37    0.83   0
   7  23   4    0.51    1.16   0
   8  -1  -2   35.38    0.43   0
   8  10  -2   41.51    0.64   0
   8  11  -2    1.61    0.65   0
   8  14  -1   22.03    0.81   0
   8  20   2    7.67    0.87   0
   9   0  -2  254.51    0.82   0
   9   8  -2   58.50    0.69   0
   9   9  -2   34.63    0.77   0
   9  13  -1    5.03    0.68   0
  10  -3  -1    3.75    0.48   0
  10   3  -2    2.99    0.58   0
  10   4  -2   16.36    0.63   0
  10   5  -2    3.63    0.66   0
  10   6  -2   13.74    0.70   0
  10  12  -1    1.99    0.85   0
  10  17   1    1.03    0.99   0
  11  -5   0    0.48    0.49   0
  11  -1  -1   17.41    0.66   0
  11   9  -1    6.31    0.69   0
  11  10  -1   11.84    0.89   0
  11  13   0    1.05    0.82   0
  11  16   1    7.53    1.19   0
  12 -12   4    1.81    0.35   0
  12  -6   1   18.33    0.59   0
  12  -3   0    9.33    0.62   0
  12  11   0    2.92    0.99   0
  12  14   1    3.71    0.96   0
  13   1   0    2.44    0.82   0
  13   2   0    7.44    0.79   0
  13   3   0    4.63    0.82   0
  13   4   0   18.85    0.92   0
  13   5   0    4.74    0.91   0
  13   6   0    1.24    0.93   0
  13   7   0    4.67    0.98   0
  13   8   0   27.50    1.05   0
  13  11   1    1.60    0.93   0
  13  12   1    4.15    1.21   0
  14  -4   2   20.40    0.81   0
  14   0   1    2.71    0.91   0
  14   1   1   -0.31    0.86   0
  14   2   1    1.66    0.89   0
  14   3   1   -0.32    0.93   0
  14   4   1    1.58    0.92   0
  14   5   1    2.17    0.98   0
  14   6   1   -0.09    1.08   0
  14   7   1    0.68    1.11   0
  14   8   1   -1.57    1.15   0
  -9  -4  21    1.12    0.90   0
  -9  -3  20    0.80    0.82   0
  -9  -3  21    1.16    0.86   0
  -9  -2  20    4.01    0.84   0
  -9  -1  19    0.01    0.75   0
  -9   0  19    2.64    0.74   0
  -9   1  19    3.84    0.78   0
  -9   2  18    2.83    0.64   0
  -9   3  18    1.08    0.62   0
  -9   4  18   12.19    0.64   0
  -9   5  19    0.91    0.67   0
  -9   6  19    1.79    0.66   0
  -9   7  19   -0.02    0.62   0
  -8 -10  22    8.60    0.99   0
  -8  -9  20   -0.23    0.79   0
  -8  -9  21    2.41    1.03   0
  -8  -8  19   -0.19    0.74   0
  -8  -7  18    7.44    0.80   0
  -8  -6  17   12.58    0.67   0
  -8  -4  16   12.29    0.70   0
  -8  -3  15    1.12    0.51   0
  -8  -2  15    8.79    0.63   0
  -8   0  14    3.23    0.52   0
  -8   1  14   11.59    0.53   0
  -8   2  14    1.04    0.54   0
  -8   5  14    1.78    0.47   0
  -8   6  14   10.88    0.47   0
  -8   9  15    0.22    0.44   0
  -8  12  17    3.37    0.46   0
  -7 -13  21    0.91    0.95   0
  -7 -12  20    1.80    1.02   0
  -7 -11  18    8.65    0.78   0
  -7 -10  17    1.47    0.81   0
  -7  -9  16    3.49    0.76   0
  -7  -8  15   19.68    0.75   0
  -7  -7  14   11.56    0.58   0
  -7  -5  13    3.49    0.61   0
  -7  -3  12   18.94    0.56   0
  -7  -1  11   26.57    0.43   0
  -7   0  11   21.19    0.48   0
  -7   7  11    2.01    0.34   0
  -7  10  12   11.26    0.34   0
  -7  12  13    6.54    0.31   0
  -6 -15  20    4.73    0.88   0
  -6 -15  21    1.61    1.07   0
  -6 -14  18   13.20    0.81   0
  -6 -14  19   11.18    0.94   0
  -6 -13  17    9.26    0.87   0
  -6 -12  16    2.86    0.81   0
  -6 -11  15    9.38    0.75   0
  -6  -9  13    1.12    0.67   0
  -6  -8  12   -0.21    0.60   0
  -6  -5  10   16.90    0.44   0
  -6  -2   9    0.98    0.39   0
  -6   3   8    6.45    0.29   0
  -6   4   8   40.98    0.35   0
  -6   5   8   13.19    0.28   0
  -6  12  10   36.43    0.23   0
  -6  15  12    2.24    0.22   0
  -5 -17  20    0.03    1.02   0
  -5 -16  18    7.12    0.80   0
  -5 -14  15   11.08    0.70   0
  -5 -13  14    7.45    0.76   0
  -5 -12  13   12.80    0.71   0
  -5 -11  12    2.40    0.65   0
  -5 -10  11    0.83    0.49   0
  -5  -7   9    6.33    0.41   0
  -5  -5   8   44.56    0.49   0
  -5   3   6   48.93    0.31   0
  -5   4   6    4.78    0.25   0
  -5   5   6    1.59    0.21   0
  -4 -19  20   -0.07    0.98   0
  -4 -18  18    0.71    0.83   0
  -4 -17  17   -0.22    0.86   0
  -4 -16  15   10.11    0.69   0
  -4 -15  14    6.69    0.78   0
  -4 -10   9    3.46    0.42   0
  -4  14   6    1.51    0.19   0
  -3 -20  19    2.84    0.94   0
  -3 -19  17    0.51    0.81   0
  -3 -18  16   11.14    0.90   0
  -3 -17  14    1.61    0.63   0
  -3 -12   9   30.12    0.58   0
  -3 -11   8    2.17    0.40   0
  -3  -8   6   44.18    0.41   0
  -3  -6   5  254.38    0.60   0
  -3  -3   4   29.86    0.32   0
  -3   1   3    2.76    0.17   0
  -3  13   4    8.50    0.22   0
  -2 -21  19   -0.96    1.11   0
  -2 -20  17    0.63    0.92   0
  -2 -19  15    0.14    0.87   0
  -2 -17  12    0.84    0.58   0
  -2 -16  11    1.25    0.54   0
  -2 -14   9   40.66    0.53   0
  -2 -13   8    3.35    0.43   0
  -2 -10   6   16.25    0.44   0
  -2  -4   3  113.98    0.35   0
  -1 -22  18    8.80    0.91   0
  -1 -21  16    1.44    0.77   0
  -1 -19  13    3.86    0.60   0
  -1 -13   7   47.05    0.53   0
  -1 -12   6   42.66    0.42   0
  -1  18   4   12.52    0.44   0
  -1  21   6    6.08    0.53   0
   0 -20  13   -0.36    0.61   0
   0 -12   5    0.45    0.30   0
   0  10   0   49.82    0.34   0
   0  18   3    6.52    0.46   0
   0  21   5    0.36    0.58   0
   1 -20  12   -0.62    0.68   0
   1   2  -1   97.31    0.21   0
   1   8  -1  138.78    0.40   0
   1  13   0   33.17    0.41   0
   1  16   1   37.48    0.50   0
   1  18   2   10.53    0.51   0
   1  21   4    1.95    0.59   0
   1  22   5    9.17    0.65   0
   1  25   8    0.82    0.77   0
   2 -22  14    1.48    0.78   0
   2 -20  11    0.26    0.62   0
   2 -19  10    4.03    0.62   0
   2 -11   3  127.42    0.41   0
   2  12  -1   21.39    0.43   0
   2  15   0   11.78    0.49   0
   2  17   1   18.18    0.55   0
   2  19   2   18.23    0.61   0
   2  22   4    1.39    0.69   0
   2  23   5    0.40    0.72   0
   2  24   6    3.54    0.80   0
   2  25   7   -0.05    0.83   0
   3 -22  13    1.78    0.70   0
   3 -18   8    0.69    0.45   0
   3 -17   7    1.03    0.39   0
   3  -6   0    1.84    0.08   0
   3   1  -2   11.30    0.24   0
   3   9  -2    1.78    0.41   0
   3  16   0    6.19    0.46   0
   3  18   1    0.64    0.50   0
   3  20   2    7.84    0.67   0
   3  24   5    1.95    0.89   0
   4 -21  11    0.28    0.58   0
   4  -9   1   64.11    0.18   0
   4  -1  -2   24.26    0.25   0
   4  11  -2   61.77    0.56   0
   4  17   0    2.96    0.66   0
   4  19   1    7.84    0.73   0
   4  22   3    1.61    0.84   0
   4  23   4    1.22    0.84   0
   5 -22  12    0.65    0.61   0
   5  -2  -2   14.85    0.25   0
   5  12  -2   87.48    0.68   0
   5  15  -1   37.36    0.64   0
   5  21   2    6.13    0.85   0
   6 -22  12   10.17    0.70   0
   6   5  -3    8.61    0.45   0
   6   6  -3    4.48    0.44   0
   6  12  -2   38.82    0.57   0
   6  18   0    1.74    0.80   0
   6  21   2    2.20    0.88   0
   7 -22  12   -1.19    0.64   0
   7   4  -3   23.95    0.48   0
   7   5  -3   11.44    0.48   0
   7   6  -3   18.19    0.51   0
   7  12  -2   19.66    0.59   0
   7  15  -1    2.29    0.64   0
   7  18   0   22.50    0.90   0
   7  21   2   -0.07    0.97   0
   8 -21  11    2.50    0.57   0
   8  -8   0   21.94    0.25   0
   8  -2  -2  206.79    0.65   0
   8  12  -2    2.17    0.71   0
   8  15  -1    2.41    0.67   0
   8  17   0    0.41    0.73   0
   8  19   1    0.58    0.82   0
   8  22   3    2.23    0.98   0
   9 -20  10    1.58    0.50   0
   9  -5  -1    2.50    0.38   0
   9  -1  -2   72.91    0.55   0
   9  10  -2    1.76    0.58   0
   9  11  -2    2.35    0.76   0
   9  14  -1    2.93    0.72   0
  10  -9   1    4.88    0.32   0
  10   1  -2    7.06    0.54   0
  10   2  -2   15.83    0.59   0
  10   7  -2    0.04    0.58   0
  10   8  -2    2.48    0.61   0
  10   9  -2    1.04    0.77   0
  10  13  -1   22.38    0.81   0
  10  18   1   -0.18    1.05   0
  11 -10   2    8.27    0.36   0
  11  -8   1   28.26    0.47   0
  11  -2  -1    7.47    0.61   0
  11  11  -1    1.89    0.75   0
  11  12  -1    1.35    0.90   0
  12   1  -1   25.35    0.82   0
  12   2  -1   19.21    0.76   0
  12   3  -1    5.38    0.74   0
  12   4  -1    1.90    0.63   0
  12   5  -1    3.14    0.67   0
  12   6  -1   21.29    0.74   0
  12   7  -1    3.45    0.81   0
  12   8  -1   22.58    0.93   0
  12   9  -1    1.88    0.88   0
  12  12   0    0.96    0.87   0
  12  15   1    0.09    1.01   0
  13  -9   3   16.89    0.56   0
  13  -7   2    3.14    0.60   0
  13  -4   1    6.57    0.68   0
  13   0   0   16.08    0.76   0
  13   9   0   -0.17    1.03   0
  13  10   0    1.56    1.11   0
  13  13   1    0.19    0.98   0
  14  -7   3    2.31    0.71   0
  14  -1   1    0.55    0.87   0
  14   9   1    1.06    0.98   0
  -9  -2  21    4.66    0.89   0
  -9  -1  20   -0.13    0.78   0
  -9   0  20   -0.41    0.78   0
  -9   1  20    6.71    0.85   0
  -9   2  19    2.24    0.69   0
  -9   3  19    3.09    0.68   0
  -9   4  19    0.62    0.65   0
  -9   7  20    0.86    0.69   0
  -8  -9  22    0.50    1.05   0
  -8  -8  20    2.42    0.79   0
  -8  -8  21    0.23    1.01   0
  -8  -7  19    1.63    0.70   0
  -8  -6  18    0.99    0.77   0
  -8  -5  17   11.60    0.64   0
  -8  -3  16    1.28    0.66   0
  -8  -1  15    4.28    0.60   0
  -8   3  14    0.22    0.47   0
  -8   4  14    3.95    0.46   0
  -8   8  15    2.44    0.48   0
  -8  10  16    0.65    0.45   0
  -7 -12  21    4.89    0.92   0
  -7 -12  22    0.38    1.09   0
  -7 -11  19    3.10    0.78   0
  -7 -11  20    0.13    0.95   0
  -7 -10  18   18.57    0.90   0
  -7  -9  17    4.92    0.82   0
  -7  -8  16    9.03    0.77   0
  -7  -7  15    0.42    0.70   0
  -7  -6  14    3.98    0.54   0
  -7  -4  13   32.98    0.62   0
  -7  -2  12   12.88    0.53   0
  -7   1  11    2.45    0.41   0
  -7   2  11    2.87    0.42   0
  -7   3  11    7.92    0.42   0
  -7   6  11   30.22    0.42   0
  -6 -14  20    3.72    1.03   0
  -6 -13  18   13.88    0.90   0
  -6 -12  17   15.18    0.86   0
  -6 -10  14   14.30    0.60   0
  -6  -7  12    0.13    0.56   0
  -6  -6  11   38.94    0.52   0
  -6  -4  10   22.15    0.42   0
  -6  -1   9    6.22    0.40   0
  -5 -17  21    0.32    0.93   0
  -5 -16  19    1.30    0.81   0
  -5 -15  17    0.50    0.73   0
  -5 -14  16    7.07    0.82   0
  -5  -9  11   -0.13    0.55   0
  -5  -8  10   29.01    0.49   0
  -5  -6   9   32.34    0.50   0
  -5  -2   7    5.54    0.30   0
  -4 -18  19    1.28    0.87   0
  -4 -18  20   11.64    1.12   0
  -4 -17  18    2.48    0.91   0
  -4 -16  16    2.92    0.84   0
  -4 -14  13   11.75    0.62   0
  -4 -13  12    1.24    0.54   0
  -4 -12  11    3.54    0.49   0
  -4  -8   8   12.15    0.39   0
  -4  -6   7   93.44    0.54   0
  -4  -4   6  127.88    0.52   0
  -4  -1   5    0.95    0.28   0
  -4  16   7    0.83    0.25   0
  -4  20  10   15.82    0.39   0
  -3 -20  20   20.31    1.05   0
  -3 -19  18    0.57    0.81   0
  -3 -17  15    6.27    0.82   0
  -3 -15  12    2.87    0.58   0
  -3 -14  11   11.89    0.55   0
  -3 -13  10    6.62    0.49   0
  -3  -9   7    5.40    0.35   0
  -3   2   3   93.33    0.24   0
  -2 -20  18    9.63    0.98   0
  -2 -19  16    1.61    0.91   0
  -2 -18  14    1.81    0.63   0
  -2 -11   7    2.02    0.43   0
  -2  -8   5   60.93    0.45   0
  -2  -6   4   22.31    0.36   0
  -2   0   2  177.04    0.29   0
  -2  11   2    2.63    0.23   0
  -2  18   5   10.90    0.39   0
  -1 -21  17    5.13    0.83   0
  -1 -17  11    8.40    0.54   0
  -1 -16  10   46.75    0.67   0
  -1 -15   9    6.10    0.54   0
  -1 -14   8  113.97    0.61   0
  -1 -10   5   13.11    0.40   0
  -1  -4   2   47.07    0.25   0
  -1  11   1   12.25    0.27   0
   0 -22  17    2.08    0.80   0
   0 -18  11    0.58    0.64   0
   0 -17  10    9.61    0.59   0
   0 -14   7   29.07    0.49   0
   0 -13   6    2.58    0.32   0
   0 -10   4    3.77    0.32   0
   0  11   0    4.20    0.30   0
   0  20   4   33.17    0.58   0
   1 -21  14    1.09    0.75   0
   1 -19  11   10.04    0.62   0
   1 -18  10    7.68    0.57   0
   1 -14   6    8.93    0.39   0
   1   9  -1   14.33    0.28   0
   1  14   0   43.07    0.46   0
   1  20   3    4.82    0.56   0
   2 -21  13    0.38    0.72   0
   2 -18   9    0.70    0.49   0
   2  18   1    5.48    0.55   0
   2  21   3    8.61    0.69   0
   3 -10   2  158.10    0.34   0
   3  10  -2  203.83    0.62   0
   3  14  -1   13.61    0.43   0
   3  17   0    5.76    0.57   0
   3  19   1    2.08    0.64   0
   3  22   3    3.53    0.74   0
   3  23   4    0.96    0.79   0
   3  25   6    0.21    0.86   0
   4 -19   9    1.71    0.53   0
   4 -18   8   12.71    0.50   0
   4 -16   6   15.30    0.40   0
   4 -15   5   30.02    0.37   0
   4  15  -1   33.45    0.53   0
   4  18   0   10.59    0.68   0
   4  21   2    2.96    0.74   0
   4  25   5    0.54    0.93   0
   5 -23  14    1.40    0.75   0
   5 -21  11    2.13    0.56   0
   5 -20  10    1.77    0.53   0
   5 -14   4   27.87    0.31   0
   5   6  -3   25.48    0.47   0
   5   7  -3   24.01    0.47   0
   5  13  -2   12.84    0.49   0
   5  16  -1    8.23    0.66   0
   5  18   0    0.37    0.59   0
   5  20   1   -0.35    0.77   0
   5  23   3    0.97    0.96   0
   5  24   4    8.49    1.01   0
   6 -21  11   -0.32    0.60   0
   6  -6  -1   23.67    0.19   0
   6  -3  -2   33.38    0.30   0
   6   2  -3  115.13    0.52   0
   6   3  -3    1.69    0.39   0
   6   4  -3   23.26    0.38   0
   6   7  -3   80.98    0.52   0
   6   8  -3   10.26    0.42   0
   6   9  -3   22.45    0.56   0
   6  13  -2   16.31    0.56   0
   6  14  -2   15.20    0.68   0
   6  16  -1   26.08    0.64   0
   6  20   1    7.18    0.74   0
   6  23   3    0.73    0.97   0
   6  24   4   -0.32    0.89   0
   7 -21  11    0.73    0.61   0
   7  -6  -1   44.70    0.26   0
   7  -3  -2   25.10    0.32   0
   7   2  -3   32.84    0.44   0
   7   3  -3   16.07    0.43   0
   7   7  -3   11.50    0.44   0
   7   8  -3   17.93    0.47   0
   7   9  -3    1.91    0.56   0
   7  13  -2    4.23    0.58   0
   7  14  -2   25.20    0.75   0
   7  16  -1   14.32    0.70   0
   7  20   1    8.88    0.81   0
   7  23   3    0.89    1.08   0
   8 -14   4    4.27    0.20   0
   8   3  -3    7.26    0.49   0
   8   4  -3   17.80    0.53   0
   8   5  -3   41.64    0.59   0
   8   6  -3    4.94    0.46   0
   8   7  -3   27.04    0.60   0
   8   8  -3    4.20    0.59   0
   8  13  -2    6.33    0.63   0
   8  16  -1    7.15    0.73   0
   8  18   0   15.92    0.80   0
   8  20   1    9.61    1.02   0
   9 -19   9    0.83    0.43   0
   9 -16   6    6.14    0.29   0
   9  -2  -2   21.42    0.47   0
   9  12  -2   30.00    0.74   0
   9  15  -1    1.27    0.75   0
   9  21   2   -0.83    0.99   0
  10  -7   0   14.98    0.40   0
  10  -4  -1   12.88    0.44   0
  10   0  -2    0.61    0.52   0
  10  10  -2   31.74    0.73   0
  10  11  -2    1.77    0.82   0
  10  14  -1    1.63    0.77   0
  11 -17   8    1.04    0.30   0
  11  -3  -1    5.99    0.55   0
  11   2  -2   33.61    0.68   0
  11   3  -2    4.59    0.67   0
  11   4  -2   28.48    0.74   0
  11   5  -2    6.91    0.69   0
  11   6  -2    1.16    0.71   0
  11   7  -2    5.24    0.80   0
  11   8  -2    9.64    0.83   0
  12  -9   2    2.95    0.44   0
  12  -4   0    5.10    0.59   0
  12   0  -1   14.66    0.70   0
  12  10  -1   18.43    0.99   0
  12  11  -1    3.30    0.98   0
  12  14   0   14.50    1.16   0
  13 -11   4    3.07    0.45   0
  13  -5   1    1.00    0.62   0
  13  -2   0    3.34    0.75   0
  13  -1   0    1.47    0.68   0
  13  11   0    2.03    0.96   0
  14  -5   2    0.61    0.75   0
  14  -2   1    0.74    0.85   0
  14   3   0    2.63    0.98   0
  14   4   0    2.74    0.91   0
  14   5   0    1.04    1.00   0
  14   6   0    7.75    1.08   0
  14   7   0    0.58    1.04   0
  -9  -2  22    0.28    0.90   0
  -9  -1  21    0.33    0.82   0
  -9   0  21    2.83    0.84   0
  -9   1  21   -0.65    0.89   0
  -9   2  20   22.18    0.80   0
  -9   2  21    0.87    0.86   0
  -9   3  20    9.83    0.74   0
  -9   3  21    2.24    0.83   0
  -9   4  20    1.13    0.68   0
  -9   5  20    1.11    0.65   0
  -8  -8  22    2.29    1.02   0
  -8  -7  20   12.48    0.80   0
  -8  -7  21    0.13    0.97   0
  -8  -6  19    0.70    0.81   0
  -8  -6  20    1.18    0.87   0
  -8  -5  18    5.36    0.76   0
  -8  -4  17    1.81    0.59   0
  -8  -3  17    1.50    0.69   0
  -8  -2  16   14.19    0.65   0
  -8  -1  16    1.49    0.67   0
  -8   0  15    9.81    0.57   0
  -8   1  15    3.76    0.54   0
  -8   2  15   16.56    0.61   0
  -8   3  15    3.77    0.57   0
  -8   6  15    9.78    0.50   0
  -8   7  15    5.19    0.47   0
  -8   9  16    0.61    0.48   0
  -8  11  17   -0.07    0.47   0
  -8  12  18   -0.12    0.51   0
  -7 -11  21    0.71    1.05   0
  -7 -10  19    7.70    0.91   0
  -7  -9  18   -0.10    0.85   0
  -7  -8  17    6.08    0.75   0
  -7  -7  16    4.55    0.72   0
  -7  -6  15   36.90    0.76   0
  -7  -5  14    2.31    0.63   0
  -7  -3  13   13.29    0.57   0
  -7  -1  12   11.56    0.51   0
  -7   4  11   13.98    0.41   0
  -7   5  11    2.51    0.37   0
  -7   9  12    2.66    0.35   0
  -7  13  14    0.99    0.32   0
  -7  14  15   15.40    0.38   0
  -7  15  16    0.84    0.35   0
  -6 -14  21    0.19    1.05   0
  -6 -14  22    2.90    1.12   0
  -6 -13  19    2.06    0.91   0
  -6 -12  18   25.48    0.92   0
  -6 -11  16    6.71    0.65   0
  -6 -10  15    5.94    0.71   0
  -6  -9  14    3.53    0.65   0
  -6  -8  13   20.73    0.56   0
  -6  -5  11    4.05    0.52   0
  -6  -3  10   10.68    0.46   0
  -6   0   9   77.17    0.49   0
  -6   9   9    2.15    0.23   0
  -5 -16  20   11.44    0.89   0
  -5 -16  21    0.47    1.10   0
  -5 -15  18   -0.96    0.75   0
  -5 -15  19   -0.07    0.89   0
  -5 -14  17    7.15    0.91   0
  -5 -13  15    2.01    0.65   0
  -5 -12  14    5.09    0.58   0
  -5 -11  13    4.98    0.55   0
  -5 -10  12   13.50    0.54   0
  -5  -7  10    5.22    0.50   0
  -5  -4   8   28.68    0.39   0
  -5  -1   7   31.54    0.39   0
  -5  10   7    1.96    0.14   0
  -4 -18  21    3.44    1.18   0
  -4 -17  19   -0.02    1.00   0
  -4 -16  17    2.16    0.87   0
  -4 -15  15    2.01    0.64   0
  -4 -14  14   12.38    0.79   0
  -4 -13  13    6.64    0.68   0
  -4 -10  10   37.35    0.61   0
  -4  -9   9    7.59    0.42   0
  -4   0   5   21.46    0.28   0
  -4  19   9    2.61    0.32   0
  -3 -19  19    0.62    0.87   0
  -3 -19  20    0.70    1.08   0
  -3 -18  17    2.65    0.77   0
  -3 -17  16    1.60    0.82   0
  -3 -16  14    1.80    0.61   0
  -3 -15  13    0.93    0.69   0
  -3 -10   8   61.09    0.49   0
  -3  -7   6   14.89    0.36   0
  -3  -5   5    1.45    0.29   0
  -2 -20  19    0.61    1.05   0
  -2 -19  17    1.98    0.91   0
  -2 -16  12    1.72    0.56   0
  -2 -13   9   19.33    0.56   0
  -1 -21  18    0.44    1.00   0
  -1 -20  16    1.20    0.72   0
  -1 -11   6   68.21    0.49   0
  -1  -8   4   42.60    0.39   0
  -1  -6   3   18.51    0.29   0
  -1  17   3   57.17    0.45   0
  -1  19   4    6.73    0.46   0
   0 -22  18    0.36    0.98   0
   0 -19  13    5.92    0.71   0
   0 -16   9   -0.41    0.44   0
   0 -15   8   14.12    0.43   0
   0  -8   3    6.51    0.26   0
   0  17   2   -0.23    0.40   0
   0  19   3    2.21    0.47   0
   0  22   5    5.51    0.62   0
   0  23   6    0.32    0.65   0
   0  24   7    0.41    0.70   0
   0  25   8    0.02    0.76   0
   1 -20  13    0.75    0.72   0
   1 -17   9   29.87    0.55   0
   1 -16   8    1.28    0.47   0
   1 -15   7    1.62    0.41   0
   1  10  -1   32.33    0.32   0
   1  17   1   16.08    0.50   0
   1  19   2    3.42    0.52   0
   1  22   4    1.78    0.70   0
   1  23   5    5.70    0.66   0
   1  24   6    3.41    0.71   0
   1  25   7   -0.33    0.76   0
   2 -20  12    6.72    0.68   0
   2  -9   2    3.14    0.21   0
   2  -7   1   38.89    0.19   0
   2   4  -2   20.72    0.31   0
   2   5  -2  101.31    0.36   0
   2   6  -2    5.39    0.25   0
   2   7  -2   14.74    0.35   0
   2   8  -2   30.85    0.39   0
   2  13  -1    3.60    0.35   0
   2  16   0   78.33    0.56   0
   2  20   2    1.89    0.61   0
   2  23   4    0.39    0.70   0
   2  24   5    1.96    0.76   0
   2  25   6    0.30    0.82   0
   3 -23  16    0.70    0.89   0
   3 -22  14    5.04    0.76   0
   3 -13   4   11.20    0.30   0
   3  11  -2   14.34    0.38   0
   3  15  -1    8.35    0.54   0
   3  21   2    1.72    0.69   0
   3  25   5    0.99    0.94   0
   4 -17   7    0.66    0.36   0
   4   6  -3   44.65    0.45   0
   4  16  -1    5.16    0.48   0
   4  20   1   -0.18    0.60   0
   4  22   2    0.60    0.76   0
   4  23   3    2.66    0.89   0
   4  24   4    0.66    0.76   0
   5 -22  13    1.65    0.66   0
   5 -19   9    0.65    0.51   0
   5 -11   2    8.12    0.17   0
   5   2  -3   24.95    0.37   0
   5   3  -3    2.87    0.31   0
   5   8  -3    7.96    0.38   0
   5   9  -3   42.22    0.45   0
   5  10  -3   17.23    0.51   0
   5  14  -2    3.22    0.49   0
   5  17  -1    0.16    0.68   0
   5  19   0    4.39    0.77   0
   5  21   1    3.21    0.80   0
   5  22   2    6.84    0.76   0
   6 -20  10   20.16    0.58   0
   6   1  -3   39.85    0.40   0
   6  10  -3    6.34    0.46   0
   6  11  -3    7.29    0.57   0
   6  15  -2   11.47    0.69   0
   6  17  -1    5.43    0.65   0
   6  19   0    5.53    0.69   0
   6  24   3    2.10    1.06   0
   7 -20  10    0.70    0.55   0
   7   1  -3   20.03    0.40   0
   7  10  -3    9.97    0.52   0
   7  11  -3   50.60    0.71   0
   7  15  -2   17.73    0.80   0
   7  17  -1    2.85    0.67   0
   7  19   0    2.62    0.73   0
   7  21   1    4.46    0.99   0
   8 -20  10    0.53    0.51   0
   8  -6  -1   49.52    0.32   0
   8  -3  -2   33.75    0.39   0
   8   1  -3   38.08    0.47   0
   8   2  -3   47.48    0.53   0
   8   9  -3   18.17    0.55   0
   8  10  -3   16.27    0.68   0
   8  14  -2   44.35    0.77   0
   8  17  -1    5.03    0.76   0
   8  19   0    1.07    0.80   0
   8  22   2    7.96    1.01   0
   9 -18   8    5.93    0.39   0
   9 -17   7    2.02    0.34   0
   9  -8   0    3.17    0.29   0
   9   3  -3   22.87    0.59   0
   9   4  -3   26.55    0.62   0
   9   5  -3   18.95    0.54   0
   9   6  -3   17.97    0.56   0
   9   7  -3   27.33    0.60   0
   9   8  -3   26.75    0.71   0
   9   9  -3   14.12    0.72   0
   9  13  -2    3.77    0.68   0
   9  14  -2    4.95    0.85   0
  10 -11   2    1.33    0.21   0
  10  -1  -2    7.38    0.50   0
  10  12  -2    0.51    0.71   0
  10  13  -2    0.32    0.86   0
  10  18   0    0.50    1.05   0
  11  -6   0    7.89    0.42   0
  11   1  -2   13.72    0.63   0
  11   9  -2    4.03    0.70   0
  11  10  -2    6.01    0.85   0
  11  11  -2    0.17    0.87   0
  11  14  -1    2.14    0.86   0
  12  -7   1    2.24    0.48   0
  12  -1  -1    1.91    0.63   0
  12  15   0    2.83    1.00   0
  13   2  -1    1.85    0.78   0
  13   3  -1    1.84    0.80   0
  13   4  -1    2.22    0.86   0
  13   5  -1    0.76    0.85   0
  13   6  -1    1.82    0.88   0
  13   7  -1    1.03    0.91   0
  13   8  -1   14.35    1.04   0
  13   9  -1    6.18    1.07   0
  14  -8   3    1.42    0.63   0
  14  -6   2    1.62    0.73   0
  14  -3   1    0.40    0.79   0
  14   1   0    1.22    0.85   0
  14   2   0    6.23    0.91   0
  14   8   0    0.84    0.95   0
  -9   4  21    1.20    0.73   0
  -8  -7  22    6.44    1.03   0
  -8  -6  21    1.87    0.93   0
  -8  -5  19    0.93    0.69   0
  -8  -5  20    8.24    0.85   0
  -8  -4  18    6.03    0.65   0
  -8  -4  19    4.29    0.78   0
  -8  -3  18    1.98    0.69   0
  -8  -2  17    9.33    0.71   0
  -8   0  16    8.44    0.61   0
  -8   1  16    1.39    0.64   0
  -8   5  15    0.19    0.44   0
  -8   8  16    2.93    0.50   0
  -8  10  17    0.33    0.53   0
  -7 -11  22    0.99    0.91   0
  -7 -10  20    5.04    0.82   0
  -7 -10  21   -0.07    1.03   0
  -7  -9  19    1.36    0.90   0
  -7  -8  18   15.26    0.82   0
  -7  -5  15    7.56    0.65   0
  -7  -4  14   28.21    0.67   0
  -7  -2  13    3.75    0.53   0
  -7   0  12   23.92    0.52   0
  -7   1  12    7.88    0.49   0
  -7  11  13    1.87    0.34   0
  -6 -13  20   -0.05    0.84   0
  -6 -13  21    0.86    1.06   0
  -6 -12  19    6.40    0.93   0
  -6 -11  17    5.93    0.79   0
  -6 -10  16   27.35    0.81   0
  -6  -9  15   23.97    0.72   0
  -6  -8  14   13.46    0.69   0
  -6  -7  13    4.50    0.62   0
  -6  -6  12    8.35    0.48   0
  -6  -4  11   13.66    0.51   0
  -6  -2  10    4.12    0.43   0
  -6   1   9   20.03    0.38   0
  -6  16  13    2.67    0.25   0
  -5 -16  22    0.25    0.98   0
  -5 -15  20    2.69    1.00   0
  -5 -14  18   11.46    0.92   0
  -5 -13  16   17.36    0.72   0
  -5 -12  15   15.54    0.79   0
  -5 -11  14    0.17    0.67   0
  -5 -10  13    2.63    0.62   0
  -5  -9  12    8.20    0.58   0
  -5  -8  11    9.84    0.55   0
  -5  -5   9   12.39    0.45   0
  -5  -3   8   16.97    0.42   0
  -5   0   7   19.30    0.34   0
  -4 -17  20    1.44    1.06   0
  -4 -16  18    0.72    0.90   0
  -4 -15  16   -0.60    0.81   0
  -4 -12  12    1.58    0.52   0
  -4 -11  11    2.93    0.47   0
  -4  -7   8    8.99    0.37   0
  -4  -5   7   17.60    0.43   0
  -4  -3   6    9.47    0.30   0
  -4  18   8   28.46    0.33   0
  -4  22  12    2.42    0.43   0
  -3 -19  21    0.22    1.16   0
  -3 -18  18    7.83    0.86   0
  -3 -16  15    2.11    0.77   0
  -3 -14  12    3.17    0.54   0
  -3 -13  11   22.02    0.54   0
  -3 -12  10   28.69    0.50   0
  -3 -11   9    4.67    0.42   0
  -3  -8   7   38.80    0.48   0
  -3  -2   4    7.25    0.22   0
  -3   3   3   25.14    0.16   0
  -3  10   3   79.34    0.20   0
  -2 -20  20    2.06    1.14   0
  -2 -19  18    0.02    0.94   0
  -2 -18  16    2.22    0.86   0
  -2 -17  14    2.79    0.73   0
  -2  -9   6   20.78    0.37   0
  -2  -3   3    5.59    0.22   0
  -1 -21  19   -0.32    0.90   0
  -1 -20  17    1.99    0.86   0
  -1 -19  15    1.54    0.67   0
  -1 -17  12    0.24    0.55   0
  -1 -16  11    5.86    0.63   0
  -1 -15  10    4.91    0.55   0
  -1 -13   8    8.35    0.48   0
  -1 -12   7   89.68    0.56   0
  -1  22   6    6.42    0.56   0
  -1  23   7    0.81    0.62   0
  -1  24   8   -0.19    0.65   0
   0 -18  12   -0.58    0.64   0
   0 -11   5   38.88    0.41   0
   0  12   0   46.41    0.36   0
   0  21   4    5.05    0.59   0
   1 -22  17    0.66    0.81   0
   1 -19  12    0.39    0.65   0
   1   1  -1    2.18    0.09   0
   1  11  -1   46.35    0.36   0
   1  15   0   10.54    0.43   0
   1  21   3    0.33    0.58   0
   2 -22  16    0.27    0.87   0
   2 -21  14   -0.46    0.75   0
   2 -19  11    3.79    0.63   0
   2 -12   4    6.09    0.28   0
   2  -2  -1   23.57    0.12   0
   2   3  -2  198.11    0.42   0
   2   9  -2    3.08    0.30   0
   2  14  -1   49.13    0.52   0
   2  17   0    6.08    0.56   0
   2  19   1    9.12    0.58   0
   2  22   3   16.49    0.71   0
   3 -21  13    2.99    0.68   0
   3 -15   6   13.11    0.40   0
   3 -14   5  130.50    0.51   0
   3  -8   1   58.93    0.20   0
   3   0  -2   56.80    0.25   0
   3  12  -2    5.84    0.36   0
   3  16  -1    7.56    0.56   0
   3  18   0   30.61    0.58   0
   3  23   3    4.63    0.77   0
   3  24   4    1.18    0.81   0
   4 -12   3   55.02    0.29   0
   4  -5  -1    7.39    0.11   0
   4  -2  -2  358.30    0.43   0
   4   4  -3  160.21    0.53   0
   4   5  -3    3.75    0.33   0
   4   7  -3   50.40    0.43   0
   4   8  -3   19.90    0.39   0
   4   9  -3    8.42    0.45   0
   4  14  -2    4.74    0.47   0
   4  17  -1    1.90    0.64   0
   4  19   0    1.02    0.66   0
   4  21   1    1.99    0.75   0
   4  25   4    1.49    0.90   0
   5 -21  12    1.61    0.68   0
   5 -18   8    5.86    0.45   0
   5 -17   7   11.69    0.41   0
   5 -16   6    1.18    0.36   0
   5 -15   5   17.56    0.32   0
   5  -3  -2   29.69    0.25   0
   5  11  -3   28.45    0.57   0
   5  15  -2    4.79    0.53   0
   5  18  -1    4.32    0.74   0
   5  20   0   15.60    0.84   0
   5  23   2    7.26    0.97   0
   5  24   3    1.71    0.93   0
   5  25   4    0.88    0.88   0
   6 -19   9    0.19    0.47   0
   6 -14   4    2.15    0.24   0
   6  12  -3    6.35    0.58   0
   6  16  -2   12.00    0.72   0
   6  18  -1    1.34    0.64   0
   6  20   0   -0.07    0.83   0
   6  22   1    8.65    0.93   0
   6  23   2    3.02    0.98   0
   7 -19   9    1.88    0.47   0
   7 -14   4   37.82    0.29   0
   7   0  -3    6.03    0.35   0
   7  12  -3   29.20    0.62   0
   7  16  -2   25.88    0.85   0
   7  18  -1    8.96    0.70   0
   7  20   0    5.98    0.81   0
   7  23   2   -1.00    0.93   0
   8 -19   9    0.23    0.43   0
   8   0  -3   17.71    0.48   0
   8  11  -3   18.58    0.59   0
   8  12  -3   14.64    0.73   0
   8  15  -2    4.87    0.69   0
   8  16  -2    4.90    0.83   0
   9 -10   1   23.08    0.22   0
   9  -6  -1   23.17    0.38   0
   9  -3  -2   49.64    0.49   0
   9   1  -3    7.79    0.50   0
   9   2  -3   59.07    0.61   0
   9  10  -3   16.29    0.62   0
   9  11  -3    4.09    0.75   0
   9  15  -2   26.03    0.94   0
   9  21   1    1.97    1.02   0
  10 -14   4   -0.00    0.01   0
  10  -5  -1   20.90    0.42   0
  10  -2  -2   85.51    0.64   0
  10   3  -3    2.45    0.59   0
  10   4  -3    9.05    0.64   0
  10   5  -3    3.34    0.64   0
  10   6  -3   19.60    0.61   0
  10   7  -3   12.50    0.60   0
  10   8  -3    9.72    0.72   0
  10   9  -3    7.85    0.78   0
  10  10  -3   12.82    0.78   0
  11  -4  -1    1.36    0.49   0
  11   0  -2   42.34    0.66   0
  11  12  -2   10.09    0.79   0
  12 -11   3   10.81    0.36   0
  12  -5   0    5.03    0.54   0
  12  -2  -1    4.82    0.59   0
  12   2  -2   21.27    0.80   0
  12   3  -2    1.25    0.73   0
  12   4  -2   14.85    0.81   0
  12   5  -2    5.09    0.67   0
  12   6  -2    3.56    0.69   0
  12   7  -2    4.09    0.71   0
  12   8  -2   11.03    0.87   0
  12   9  -2    3.63    0.91   0
  12  10  -2    1.99    0.92   0
  13 -10   3    0.77    0.45   0
  13  -8   2    0.49    0.52   0
  13  -6   1    1.56    0.60   0
  13  -3   0    8.60    0.65   0
  13   0  -1    5.29    0.81   0
  13   1  -1    3.41    0.75   0
  13  10  -1    3.30    0.93   0
  14  -4   1    1.49    0.76   0
  14  -1   0   -0.24    0.86   0
  14   0   0    0.42    0.81   0
  -8  -6  22   12.24    0.99   0
  -8  -5  21    2.65    0.92   0
  -8  -4  20    3.49    0.85   0
  -8  -3  19    1.13    0.74   0
  -8  -2  18   14.86    0.74   0
  -8  -1  17    4.19    0.66   0
  -8   0  17    2.83    0.60   0
  -8   2  16    1.64    0.55   0
  -8   3  16   13.20    0.60   0
  -8   4  16    5.06    0.56   0
  -8   5  16    0.74    0.52   0
  -8   6  16    5.06    0.52   0
  -8   7  16   -0.11    0.50   0
  -8   9  17    0.28    0.52   0
  -8  11  18    6.76    0.54   0
  -7 -10  22    1.17    1.02   0
  -7 -10  23    0.48    1.06   0
  -7  -9  20    3.24    0.89   0
  -7  -8  19    1.24    0.85   0
  -7  -7  17   -0.16    0.63   0
  -7  -6  16   33.33    0.65   0
  -7  -3  14    1.85    0.58   0
  -7  -1  13   54.64    0.62   0
  -7   2  12   26.07    0.45   0
  -7   3  12   14.38    0.46   0
  -7   7  12    1.17    0.38   0
  -7   8  12    2.05    0.36   0
  -6 -13  22    4.83    0.94   0
  -6 -12  20    3.82    0.97   0
  -6 -11  18    6.89    0.73   0
  -6 -10  17    1.13    0.76   0
  -6  -5  12    0.83    0.52   0
  -6  -3  11    6.66    0.47   0
  -6  -1  10   23.00    0.45   0
  -6   2   9    5.78    0.34   0
  -6   3   9   23.50    0.38   0
  -6   8   9    9.90    0.27   0
  -5 -15  21    0.15    0.88   0
  -5 -15  22   -0.88    1.06   0
  -5 -14  19    6.18    0.91   0
  -5 -13  17    5.91    0.74   0
  -5 -12  16   45.02    0.85   0
  -5  -6  10  127.02    0.68   0
  -5  -2   8   17.67    0.39   0
  -5   1   7   42.76    0.35   0
  -4 -17  21    1.46    0.94   0
  -4 -16  19    0.97    0.93   0
  -4 -15  17    2.76    0.84   0
  -4 -14  15    9.72    0.65   0
  -4 -13  14    5.52    0.70   0
  -4 -12  13    7.05    0.68   0
  -4  -9  10   26.09    0.57   0
  -4  -8   9   13.64    0.41   0
  -4   1   5   53.51    0.29   0
  -4  12   5   45.75    0.14   0
  -3 -18  19    1.00    0.84   0
  -3 -18  20   13.07    1.13   0
  -3 -17  17    1.27    0.74   0
  -3 -16  16    0.62    0.77   0
  -3 -15  14    2.80    0.61   0
  -3 -14  13   15.30    0.72   0
  -3  -9   8    7.42    0.45   0
  -3  -6   6   10.89    0.33   0
  -3  -4   5  171.15    0.51   0
  -3  14   4    5.97    0.25   0
  -3  18   6   15.65    0.35   0
  -2 -19  19    0.17    1.00   0
  -2 -16  13    9.43    0.60   0
  -2 -10   7    1.32    0.34   0
  -2  -7   5   68.58    0.39   0
  -2  -5   4    2.67    0.24   0
  -2   1   2   70.02    0.20   0
  -2  12   2   45.99    0.27   0
  -2  19   5    4.48    0.40   0
  -1 -20  18    1.68    0.95   0
  -1 -18  14    0.98    0.62   0
  -1 -14   9   42.47    0.51   0
  -1  -9   5  296.09    0.67   0
  -1  16   2   17.62    0.39   0
  -1  18   3   31.22    0.48   0
  -1  21   5    0.70    0.52   0
   0 -17  11   -0.26    0.50   0
   0 -16  10    1.64    0.55   0
   0 -15   9    3.28    0.51   0
   0 -13   7   36.96    0.47   0
   0 -12   6  114.94    0.54   0
   0  13   0    5.34    0.33   0
   0  16   1    3.51    0.38   0
   0  18   2  160.09    0.71   0
   0  20   3    0.05    0.55   0
   1 -18  11    0.33    0.48   0
   1 -17  10    0.90    0.53   0
   1  12  -1    0.75    0.36   0
   1  16   0   11.50    0.44   0
   1  18   1    9.83    0.51   0
   1  20   2   19.98    0.59   0
   1  23   4    3.36    0.73   0
   1  24   5    6.18    0.70   0
   1  25   6    0.42    0.82   0
   2 -20  13    2.65    0.68   0
   2 -18  10   30.33    0.58   0
   2 -17   9   -0.10    0.47   0
   2  10  -2   56.23    0.40   0
   2  11  -2   29.28    0.43   0
   2  15  -1   17.25    0.50   0
   2  21   2   -0.04    0.61   0
   2  24   4    0.03    0.73   0
   2  25   5   -0.20    0.81   0
   3 -20  12   18.01    0.68   0
   3 -16   7   29.21    0.43   0
   3  13  -2   38.81    0.46   0
   3  17  -1   19.79    0.59   0
   3  19   0    1.76    0.65   0
   3  21   1    2.42    0.68   0
   3  22   2    2.96    0.71   0
   4 -19  10    1.22    0.55   0
   4   3  -3    6.88    0.27   0
   4  10  -3   21.40    0.41   0
   4  11  -3   76.91    0.59   0
   4  15  -2   19.11    0.59   0
   4  18  -1    0.41    0.67   0
   4  20   0    2.08    0.73   0
   4  23   2    3.45    0.88   0
   4  24   3   -0.65    0.86   0
   5 -20  11    0.08    0.60   0
   5   1  -3   28.03    0.30   0
   5  12  -3    4.86    0.44   0
   5  13  -3   97.95    0.73   0
   5  16  -2    5.43    0.65   0
   5  22   1    4.53    0.85   0
   6 -21  12   -0.36    0.66   0
   6 -18   8   31.80    0.48   0
   6 -17   7    0.54    0.38   0
   6 -16   6   51.44    0.45   0
   6 -15   5   11.64    0.32   0
   6   0  -3    6.07    0.32   0
   6  13  -3   42.30    0.61   0
   6  17  -2    3.94    0.73   0
   6  19  -1    3.61    0.83   0
   6  24   2    3.24    1.06   0
   7 -21  12    1.18    0.66   0
   7 -18   8    1.72    0.41   0
   7  -4  -2   34.60    0.29   0
   7  13  -3    2.51    0.60   0
   7  14  -3   32.98    0.80   0
   7  17  -2    8.42    0.82   0
   7  19  -1    1.33    0.74   0
   8 -18   8    2.61    0.40   0
   8 -17   7    6.64    0.38   0
   8 -15   5   23.65    0.29   0
   8  -4  -2   23.61    0.33   0
   8  13  -3    1.13    0.60   0
   8  14  -3    7.64    0.77   0
   8  17  -2    9.76    0.92   0
   9   0  -3   23.43    0.49   0
   9  12  -3   11.89    0.67   0
   9  13  -3   12.45    0.82   0
   9  16  -2   16.98    0.85   0
  10   1  -3    6.44    0.60   0
  10   2  -3   17.88    0.61   0
  10  11  -3    3.41    0.80   0
  10  12  -3    5.64    0.83   0
  10  15  -2    0.77    0.78   0
  11  -7   0    3.40    0.42   0
  11  -1  -2   17.71    0.59   0
  11   4  -3    8.53    0.69   0
  11   5  -3    1.71    0.70   0
  11   6  -3   20.69    0.77   0
  11   7  -3   23.60    0.84   0
  11   8  -3   36.70    0.88   0
  11   9  -3   16.87    0.87   0
  12  -3  -1   10.01    0.62   0
  12   1  -2    4.35    0.69   0
  12  11  -2    0.56    0.84   0
  12  15  -1    2.11    1.01   0
  13  -4   0   38.81    0.73   0
  13  -1  -1    3.82    0.79   0
  13   5  -2    4.04    0.85   0
  13   6  -2   27.79    0.97   0
  13   7  -2    3.42    0.91   0
  14  -7   2    3.79    0.64   0
  14  -2   0    8.47    0.83   0
  14   3  -1    1.17    0.86   0
  14   4  -1    0.92    0.95   0
  14   5  -1    0.91    0.98   0
  14   6  -1    0.59    1.03   0
  14   7  -1    0.58    1.09   0
  -8  -5  22    1.36    0.79   0
  -8  -5  23   -0.03    1.05   0
  -8  -4  21    4.17    0.90   0
  -8  -4  22    1.51    0.91   0
  -8  -3  20    1.29    0.82   0
  -8  -2  19    3.97    0.74   0
  -8  -1  18    1.17    0.68   0
  -8   0  18    1.00    0.70   0
  -8   1  17    1.30    0.60   0
  -8   2  17    2.65    0.60   0
  -8   8  17    1.66    0.55   0
  -8  10  18    5.73    0.56   0
  -8  11  19    0.71    0.56   0
  -7  -9  21    1.11    0.79   0
  -7  -9  22    0.32    1.04   0
  -7  -9  23   -0.16    1.03   0
  -7  -8  20    4.49    0.92   0
  -7  -7  18    5.27    0.66   0
  -7  -7  19    2.03    0.81   0
  -7  -6  17    5.47    0.62   0
  -7  -5  16    0.79    0.55   0
  -7  -4  15   17.31    0.57   0
  -7  -2  14    4.96    0.55   0
  -7   0  13    1.33    0.48   0
  -7   4  12   13.93    0.38   0
  -7   5  12   10.40    0.41   0
  -7   6  12   33.25    0.43   0
  -7  12  14   17.16    0.38   0
  -6 -12  21    0.87    0.85   0
  -6 -12  22    1.73    1.09   0
  -6 -11  19    3.75    0.76   0
  -6 -11  20    1.24    0.92   0
  -6 -10  18   12.59    0.87   0
  -6  -9  16    1.68    0.61   0
  -6  -8  15    5.29    0.56   0
  -6  -7  14   17.32    0.57   0
  -6  -6  13    9.21    0.48   0
  -6  -4  12    2.82    0.50   0
  -6   0  10  168.97    0.63   0
  -6   4   9   35.71    0.36   0
  -6   5   9    6.60    0.30   0
  -6   6   9    4.00    0.29   0
  -6   7   9    4.98    0.27   0
  -6  11  10    6.19    0.25   0
  -5 -14  20    2.12    0.81   0
  -5 -14  21    0.69    0.98   0
  -5 -13  18    3.78    0.72   0
  -5 -12  17   16.26    0.82   0
  -5 -11  15   32.18    0.69   0
  -5 -10  14   12.37    0.67   0
  -5  -9  13   30.88    0.69   0
  -5  -8  12   19.76    0.59   0
  -5  -7  11   27.05    0.49   0
  -5  -4   9    5.68    0.35   0
  -5   2   7   34.62    0.35   0
  -4 -16  20    1.03    0.84   0
  -4 -16  21    1.86    1.02   0
  -4 -15  18    1.56    0.84   0
  -4 -14  16   46.43    0.77   0
  -4 -13  15    3.92    0.73   0
  -4 -11  12    0.45    0.48   0
  -4 -10  11    6.29    0.47   0
  -4  -6   8  184.68    0.61   0
  -4  -4   7   14.15    0.40   0
  -4  -2   6   42.82    0.33   0
  -4   2   5   34.45    0.27   0
  -4  15   6    3.17    0.21   0
  -3 -18  21    4.28    1.09   0
  -3 -17  18    1.73    0.78   0
  -3 -17  19    2.63    0.94   0
  -3 -15  15    6.00    0.75   0
  -3 -13  12    1.00    0.52   0
  -3 -12  11   11.71    0.49   0
  -3 -11  10    1.11    0.43   0
  -3 -10   9    5.53    0.40   0
  -3  -1   4   32.74    0.28   0
  -3   4   3  136.26    0.21   0
  -2 -19  20   -0.26    1.08   0
  -2 -18  17    2.63    0.75   0
  -2 -13  10    1.16    0.44   0
  -2 -12   9   31.42    0.48   0
  -2  -8   6   10.69    0.41   0
  -2  23   8    1.48    0.56   0
  -2  24   9    0.58    0.62   0
  -1 -20  19   -0.30    0.98   0
  -1 -16  12   13.53    0.67   0
  -1 -10   6    5.10    0.39   0
  -1  -7   4   52.47    0.38   0
  -1  -3   2   28.95    0.21   0
  -1  20   4    1.02    0.48   0
   0 -14   8    2.50    0.38   0
   0  -9   4   24.62    0.34   0
   0  19   2    3.24    0.55   0
   0  22   4    0.41    0.61   0
   0  23   5    2.31    0.59   0
   0  24   6    1.81    0.64   0
   0  25   7    0.24    0.67   0
   1 -21  17    1.73    0.92   0
   1 -20  15    0.91    0.80   0
   1 -16   9    8.26    0.51   0
   1 -15   8    4.52    0.46   0
   1 -14   7   21.76    0.44   0
   1 -13   6    4.46    0.35   0
   1  13  -1   24.36    0.42   0
   1  22   3   12.85    0.66   0
   2 -19  12    0.07    0.64   0
   2 -10   3    6.35    0.25   0
   2   2  -2  614.96    0.58   0
   2  12  -2    0.53    0.41   0
   2  16  -1   -0.12    0.50   0
   2  18   0    9.78    0.56   0
   2  20   1    0.52    0.58   0
   2  22   2    0.20    0.64   0
   2  23   3    2.32    0.73   0
   3 -22  16   -0.63    0.87   0
   3 -21  14   -0.25    0.72   0
   3 -11   3   28.84    0.26   0
   3   5  -3    6.33    0.34   0
   3   6  -3  206.11    0.57   0
   3   7  -3    1.13    0.32   0
   3   8  -3    3.19    0.40   0
   3   9  -3   24.63    0.45   0
   3  14  -2    9.79    0.42   0
   3  23   2    0.84    0.75   0
   3  24   3    1.47    0.84   0
   3  25   4   -0.61    0.84   0
   4 -22  15    2.73    0.77   0
   4 -18   9    1.36    0.51   0
   4 -13   4   20.02    0.30   0
   4   2  -3   64.98    0.32   0
   4  12  -3   37.67    0.48   0
   4  16  -2   13.94    0.60   0
   4  22   1    0.18    0.76   0
   4  25   3    0.13    0.91   0
   5 -21  13   -0.38    0.71   0
   5  -6  -1   57.85    0.16   0
   5   0  -3   68.70    0.35   0
   5  14  -3   55.47    0.70   0
   5  17  -2   16.91    0.71   0
   5  19  -1    1.29    0.64   0
   5  21   0    0.92    0.69   0
   5  23   1    1.42    0.88   0
   5  24   2    0.58    0.93   0
   5  25   3    0.05    0.88   0
   6 -22  14    0.54    0.71   0
   6 -20  11   -0.28    0.55   0
   6  -4  -2    4.75    0.22   0
   6  -1  -3   48.47    0.37   0
   6   5  -4    0.44    0.43   0
   6   6  -4   16.68    0.47   0
   6   7  -4    9.93    0.48   0
   6   8  -4   22.59    0.54   0
   6   9  -4    3.19    0.53   0
   6  14  -3   17.32    0.59   0
   6  15  -3   14.38    0.71   0
   6  18  -2   -0.01    0.75   0
   6  20  -1    4.98    0.89   0
   6  23   1    4.36    0.97   0
   7 -17   7    0.73    0.38   0
   7 -16   6    2.53    0.35   0
   7 -15   5   37.51    0.34   0
   7  -1  -3   74.15    0.42   0
   7   4  -4   21.37    0.48   0
   7   5  -4   27.17    0.51   0
   7   6  -4   12.60    0.44   0
   7   7  -4    1.48    0.44   0
   7   8  -4    0.39    0.44   0
   7   9  -4    7.87    0.48   0
   7  10  -4   12.21    0.62   0
   7  15  -3   11.88    0.77   0
   7  18  -2    2.03    0.84   0
   7  23   1   -0.09    0.91   0
   8 -16   6    9.50    0.31   0
   8  -1  -3   20.74    0.40   0
   8   4  -4    1.76    0.51   0
   8   5  -4    9.03    0.56   0
   8   6  -4   19.60    0.51   0
   8   7  -4   36.89    0.56   0
   8   8  -4   43.51    0.59   0
   8   9  -4    5.37    0.63   0
   8  10  -4    0.79    0.67   0
   8  15  -3    2.20    0.82   0
   9  -4  -2  137.68    0.56   0
   9  -1  -3   10.56    0.48   0
   9   5  -4    4.31    0.59   0
   9   6  -4   69.20    0.75   0
   9   7  -4   25.22    0.71   0
   9   8  -4    1.39    0.68   0
   9   9  -4    9.80    0.69   0
   9  14  -3    1.31    0.70   0
   9  17  -2   26.40    0.86   0
   9  21   0    0.78    1.01   0
  10  -8   0   18.26    0.34   0
  10  -3  -2   22.01    0.43   0
  10   0  -3   50.98    0.66   0
  10  13  -3   10.07    0.74   0
  10  16  -2    0.32    0.82   0
  11  -9   1    9.40    0.35   0
  11  -5  -1    3.16    0.48   0
  11  -2  -2   21.57    0.61   0
  11   2  -3    9.01    0.66   0
  11   3  -3    1.04    0.67   0
  11  10  -3    1.13    0.70   0
  11  11  -3   12.76    0.90   0
  11  12  -3   -0.09    0.90   0
  11  15  -2    1.72    0.90   0
  12  -8   1   10.96    0.43   0
  12  -6   0   17.72    0.54   0
  12   0  -2   10.73    0.69   0
  12   7  -3    4.12    0.81   0
  12  13  -2    1.25    0.92   0
  13  -2  -1    4.18    0.73   0
  13   3  -2    4.90    0.82   0
  13   4  -2    3.03    0.85   0
  13   8  -2    0.74    0.80   0
  13   9  -2    0.24    0.86   0
  14  -5   1    0.06    0.69   0
  14   1  -1    0.25    0.88   0
  14   2  -1    0.65    0.88   0
  -8  -4  23    0.62    1.01   0
  -8  -3  21    0.52    0.83   0
  -8  -3  22    0.87    0.92   0
  -8  -2  20    4.70    0.81   0
  -8  -2  21   -0.13    0.82   0
  -8  -1  19    0.10    0.71   0
  -8   0  19    1.98    0.68   0
  -8   1  18   20.07    0.69   0
  -8   2  18   22.36    0.73   0
  -8   3  17   -0.83    0.52   0
  -8   4  17   14.87    0.56   0
  -8   5  17    3.49    0.58   0
  -8   6  17    0.93    0.57   0
  -8   9  18    4.68    0.53   0
  -8  10  19    0.87    0.60   0
  -7  -8  21    0.61    0.77   0
  -7  -8  22   12.10    1.02   0
  -7  -7  20   11.92    0.89   0
  -7  -6  18    9.09    0.65   0
  -7  -5  17    1.58    0.70   0
  -7  -4  16   20.19    0.68   0
  -7  -3  15    7.41    0.51   0
  -7  -1  14    3.11    0.53   0
  -7   1  13   24.22    0.50   0
  -7   2  13   32.67    0.56   0
  -7   9  13    3.99    0.39   0
  -7  13  15    9.12    0.40   0
  -7  15  17    1.06    0.43   0
  -6 -12  23    0.08    0.95   0
  -6 -11  21    0.93    0.92   0
  -6 -10  19    5.00    0.89   0
  -6  -9  17   36.05    0.72   0
  -6  -8  16   18.89    0.75   0
  -6  -7  15    0.62    0.66   0
  -6  -6  14   32.19    0.69   0
  -6  -5  13    3.05    0.54   0
  -6  -2  11    2.69    0.44   0
  -6   1  10    0.11    0.38   0
  -6  13  11    4.01    0.23   0
  -5 -14  22    8.26    0.91   0
  -5 -14  23    3.56    1.14   0
  -5 -13  19    9.80    0.76   0
  -5 -13  20    2.03    0.90   0
  -5 -12  18    5.29    0.84   0
  -5 -11  16   10.55    0.76   0
  -5 -10  15    8.99    0.70   0
  -5  -6  11    7.35    0.52   0
  -5  -5  10   18.98    0.41   0
  -5  -3   9    5.98    0.41   0
  -5  -1   8   41.02    0.42   0
  -5   3   7   92.25    0.38   0
  -4 -16  22    8.48    1.10   0
  -4 -15  19    6.69    0.76   0
  -4 -14  17    1.13    0.66   0
  -4 -12  14   80.19    0.75   0
  -4 -11  13    4.23    0.65   0
  -4 -10  12   50.20    0.65   0
  -4  -9  11    5.04    0.55   0
  -4  -8  10  203.29    0.78   0
  -4  -7   9    2.42    0.37   0
  -4  -1   6   15.65    0.33   0
  -4  17   7    4.51    0.25   0
  -3 -18  22   10.30    1.02   0
  -3 -17  20    0.39    1.04   0
  -3 -16  17    4.20    0.71   0
  -3 -16  18   21.17    0.91   0
  -3 -15  16    0.26    0.74   0
  -3 -14  14   78.29    0.76   0
  -3 -13  13   10.26    0.65   0
  -3  -8   8  142.73    0.62   0
  -3  -7   7    2.56    0.35   0
  -3  -5   6   25.07    0.41   0
  -3  -3   5    1.19    0.31   0
  -3  11   3   82.12    0.22   0
  -3  20   7    9.52    0.41   0
  -2 -19  21    1.24    0.96   0
  -2 -18  18   26.74    0.85   0
  -2 -18  19    0.84    0.96   0
  -2 -17  16    0.47    0.67   0
  -2 -15  13    0.56    0.55   0
  -2  -9   7   30.71    0.46   0
  -2  -2   3   95.78    0.33   0
  -2  13   2    3.56    0.26   0
  -2  16   3   21.56    0.37   0
  -2  18   4   14.86    0.38   0
  -2  21   6    4.98    0.46   0
  -1 -20  20    0.06    0.89   0
  -1 -15  11    1.71    0.48   0
  -1 -14  10   13.05    0.56   0
  -1 -13   9   29.50    0.54   0
  -1 -12   8    0.80    0.44   0
  -1 -11   7   10.99    0.43   0
  -1  -5   3  612.07    0.64   0
  -1  14   1   60.72    0.41   0
  -1  17   2   16.66    0.42   0
  -1  19   3    5.71    0.45   0
  -1  22   5    4.73    0.55   0
  -1  23   6    0.19    0.59   0
  -1  24   7    0.18    0.62   0
  -1  25   8   -0.27    0.68   0
   0 -21  20    1.29    0.90   0
   0 -17  12    0.82    0.51   0
   0 -16  11    0.72    0.57   0
   0 -10   5    2.64    0.35   0
   0  -7   3  437.85    0.58   0
   0   7  -1  129.35    0.33   0
   0   8  -1    4.22    0.23   0
   0  17   1    0.24    0.40   0
   0  21   3    1.42    0.57   0
   1 -18  12   21.68    0.56   0
   1 -17  11    4.30    0.55   0
   1  14  -1   39.46    0.46   0
   1  17   0    8.81    0.49   0
   1  19   1   14.87    0.52   0
   1  21   2    3.11    0.60   0
   1  25   5    0.72    0.77   0
   2 -22  18    3.41    0.79   0
   2 -21  16    0.18    0.85   0
   2 -20  14    1.85    0.73   0
   2 -18  11    6.05    0.58   0
   2  13  -2   72.93    0.54   0
   2  19   0    2.53    0.57   0
   2  21   1    0.50    0.61   0
   2  25   4    0.37    0.75   0
   2  26   5    0.46    0.87   0
   3 -22  17    6.37    0.92   0
   3 -21  15    2.86    0.77   0
   3 -20  13    2.60    0.66   0
   3  -4  -1   32.91    0.10   0
   3  -1  -2   45.86    0.22   0
   3   4  -3   85.28    0.40   0
   3  10  -3   41.53    0.42   0
   3  11  -3   19.78    0.46   0
   3  15  -2    5.55    0.45   0
   3  18  -1    2.51    0.51   0
   3  20   0   10.13    0.58   0
   3  22   1    4.91    0.75   0
   4 -22  16    0.47    0.84   0
   4 -17   8    0.08    0.39   0
   4 -16   7    8.48    0.42   0
   4 -15   6    7.63    0.37   0
   4 -14   5    6.73    0.30   0
   4   1  -3    4.94    0.26   0
   4  13  -3   15.07    0.47   0
   4  14  -3   44.34    0.62   0
   4  17  -2   12.21    0.67   0
   4  19  -1    6.26    0.59   0
   4  21   0    3.82    0.65   0
   4  23   1    0.06    0.82   0
   4  24   2    2.02    0.87   0
   5 -19  10    1.66    0.47   0
   5   6  -4   33.75    0.47   0
   5   7  -4    4.96    0.44   0
   5   8  -4   84.95    0.58   0
   5   9  -4   19.46    0.51   0
   5  10  -4    2.40    0.51   0
   5  15  -3    3.12    0.65   0
   5  18  -2   40.26    0.84   0
   5  20  -1   -0.53    0.77   0
   5  22   0    0.79    0.87   0
   5  25   2    1.22    1.00   0
   6 -21  13    0.17    0.67   0
   6   3  -4   20.71    0.41   0
   6   4  -4   54.53    0.49   0
   6  10  -4   58.44    0.57   0
   6  11  -4   15.14    0.59   0
   6  12  -4   27.54    0.62   0
   6  16  -3    3.61    0.71   0
   6  22   0    2.97    0.82   0
   7 -20  11    1.12    0.55   0
   7   3  -4    7.63    0.43   0
   7  11  -4    1.02    0.52   0
   7  12  -4    1.65    0.68   0
   7  16  -3   11.50    0.67   0
   7  19  -2    0.75    0.91   0
   8 -20  11   -0.51    0.57   0
   8   3  -4   13.47    0.51   0
   8  11  -4    4.13    0.58   0
   8  12  -4   30.89    0.79   0
   8  16  -3    2.75    0.70   0
   9 -19  10    0.47    0.53   0
   9   3  -4    4.82    0.55   0
   9   4  -4   20.50    0.62   0
   9  10  -4   50.32    0.70   0
   9  11  -4    1.88    0.72   0
   9  12  -4    2.59    0.76   0
   9  15  -3    3.23    0.76   0
   9  16  -3    0.39    0.93   0
   9  18  -2    1.43    0.84   0
  10 -18   9    0.06    0.42   0
  10  -6  -1    9.76    0.35   0
  10   5  -4    5.67    0.69   0
  10   6  -4    6.29    0.70   0
  10   7  -4    5.75    0.72   0
  10   8  -4   52.76    0.85   0
  10   9  -4   -0.67    0.77   0
  10  10  -4    8.69    0.77   0
  10  15  -3    0.34    0.95   0
  11  -3  -2   14.54    0.54   0
  11   1  -3    3.33    0.60   0
  11  13  -3    1.62    0.82   0
  12 -10   2    1.85    0.36   0
  12  -4  -1   15.53    0.59   0
  12  -1  -2   -0.17    0.60   0
  12   3  -3    0.46    0.70   0
  12   4  -3    4.33    0.78   0
  12   5  -3   14.77    0.80   0
  12   6  -3   16.51    0.72   0
  12   8  -3   34.40    0.84   0
  12   9  -3    4.15    0.77   0
  12  11  -3    6.28    1.00   0
  12  15  -2    0.46    0.99   0
  13  -9   2    1.68    0.48   0
  13  -7   1    1.50    0.49   0
  13  -5   0    6.89    0.59   0
  13   1  -2    2.63    0.76   0
  13   2  -2   30.98    0.87   0
  13  12  -2    1.51    0.97   0
  14  -3   0    3.28    0.76   0
  14   0  -1   -0.07    0.80   0
  14   6  -2    2.62    0.98   0
  14   7  -2   10.34    1.05   0
  -8  -3  23    0.45    0.81   0
  -8  -2  22    6.83    0.91   0
  -8  -2  23    2.06    0.91   0
  -8  -1  20    8.09    0.67   0
  -8  -1  21    1.53    0.82   0
  -8   0  20    7.15    0.76   0
  -8   1  19    0.44    0.68   0
  -8   2  19    4.06    0.64   0
  -8   3  18    3.17    0.60   0
  -8   4  18    1.51    0.57   0
  -8   5  18    0.88    0.63   0
  -8   6  18    3.32    0.63   0
  -8   7  18    0.65    0.60   0
  -8   8  18    2.66    0.55   0
  -8   9  19   -0.19    0.62   0
  -7  -8  23    1.91    0.89   0
  -7  -7  21    0.19    0.73   0
  -7  -7  22    6.63    0.98   0
  -7  -6  19    4.52    0.69   0
  -7  -6  20    9.99    0.86   0
  -7  -5  18    2.11    0.72   0
  -7  -4  17   22.30    0.74   0
  -7  -3  16    2.97    0.64   0
  -7  -2  15   18.92    0.54   0
  -7  -1  15   19.38    0.57   0
  -7   0  14    0.68    0.50   0
  -7   1  14   12.98    0.57   0
  -7   3  13    0.42    0.43   0
  -7   4  13   56.81    0.56   0
  -7   5  13    8.27    0.43   0
  -7   7  13    3.49    0.42   0
  -7   8  13   10.72    0.41   0
  -7  11  14    0.92    0.36   0
  -7  14  16   11.08    0.41   0
  -6 -11  22   -0.12    0.88   0
  -6 -11  23    2.37    1.09   0
  -6 -10  20   17.86    0.82   0
  -6 -10  21   -0.38    0.93   0
  -6  -9  18    3.61    0.68   0
  -6  -9  19    0.58    0.82   0
  -6  -8  17   23.38    0.80   0
  -6  -7  16   -0.32    0.67   0
  -6  -4  13    7.26    0.55   0
  -6  -3  12    3.42    0.42   0
  -6  -1  11   74.59    0.55   0
  -6   2  10   10.29    0.36   0
  -5 -13  21    1.21    0.80   0
  -5 -13  22    1.03    1.02   0
  -5 -12  19    9.61    0.89   0
  -5 -11  17   28.68    0.81   0
  -5  -9  14    6.72    0.55   0
  -5  -8  13    3.16    0.49   0
  -5  -7  12    6.84    0.47   0
  -5  -4  10   30.26    0.48   0
  -5   0   8  237.53    0.60   0
  -5   4   7    3.52    0.25   0
  -5   9   7   19.00    0.18   0
  -4 -15  20    2.54    0.79   0
  -4 -15  21   -0.11    1.01   0
  -4 -14  18    6.92    0.74   0
  -4 -13  16    2.85    0.65   0
  -4 -12  15    6.23    0.74   0
  -4  -5   8   56.10    0.43   0
  -4  -3   7   29.95    0.40   0
  -4   3   5    6.15    0.21   0
  -4  20   9    0.34    0.32   0
  -4  21  10    9.27    0.37   0
  -3 -17  21    0.95    0.88   0
  -3 -17  22    1.11    1.16   0
  -3 -16  19    6.91    0.93   0
  -3 -15  17    0.95    0.79   0
  -3 -14  15   41.01    0.83   0
  -3 -12  12   10.72    0.51   0
  -3  -9   9   -0.01    0.38   0
  -3   0   4  429.50    0.52   0
  -3   5   3  125.59    0.17   0
  -3  15   4    4.91    0.26   0
  -3  19   6    1.26    0.37   0
  -2 -18  20    2.38    1.06   0
  -2 -17  17   -0.54    0.70   0
  -2 -16  15   15.04    0.65   0
  -2 -13  11    2.28    0.46   0
  -2 -12  10   48.55    0.61   0
  -2 -11   9   14.43    0.50   0
  -2 -10   8   19.80    0.39   0
  -2  -6   5    9.81    0.29   0
  -2  -4   4  170.58    0.45   0
  -2  20   5   13.76    0.44   0
  -1 -19  19    1.53    0.92   0
  -1 -16  13   22.54    0.60   0
  -1  -8   5    3.99    0.36   0
  -1   6   0    1.67    0.14   0
  -1   7   0   11.10    0.17   0
  -1  21   4    3.11    0.52   0
   0 -19  16    8.99    0.72   0
   0 -15  10   23.39    0.59   0
   0 -14   9    7.56    0.50   0
   0 -11   6    4.28    0.37   0
   0   6  -1   16.57    0.24   0
   0   9  -1   52.87    0.32   0
   0  10  -1    9.52    0.29   0
   0  18   1    3.84    0.50   0
   0  20   2    7.37    0.57   0
   0  24   5    0.85    0.70   0
   0  25   6   -0.58    0.75   0
   1 -16  10   57.98    0.63   0
   1   7  -2    7.04    0.28   0
   1   8  -2  189.04    0.48   0
   1   9  -2    3.71    0.33   0
   1  15  -1    8.15    0.43   0
   1  18   0   85.96    0.69   0
   1  20   1   16.42    0.60   0
   1  23   3   12.84    0.68   0
   1  24   4    2.99    0.71   0
   2 -21  17    1.07    0.90   0
   2 -20  15   -0.60    0.75   0
   2 -19  13    2.76    0.68   0
   2 -17  10    6.19    0.52   0
   2  17  -1    8.16    0.45   0
   2  23   2   -1.11    0.71   0
   2  24   3    0.95    0.74   0
   3 -19  12    4.01    0.61   0
   3 -12   4   44.01    0.33   0
   3   3  -3    3.63    0.29   0
   3  12  -3   41.14    0.44   0
   3  16  -2   70.15    0.61   0
   3  19  -1    5.53    0.65   0
   3  21   0    3.00    0.70   0
   3  24   2    1.54    0.83   0
   3  25   3    1.87    0.84   0
   4  15  -3   30.59    0.63   0
   4  18  -2    1.07    0.67   0
   4  20  -1    0.49    0.72   0
   4  22   0   11.37    0.88   0
   4  25   2    1.27    0.91   0
   5 -20  12    6.79    0.68   0
   5 -18   9    8.90    0.50   0
   5 -17   8    5.80    0.47   0
   5 -12   3    6.92    0.21   0
   5   4  -4  132.83    0.55   0
   5   5  -4   19.98    0.37   0
   5  11  -4   12.51    0.47   0
   5  12  -4   24.27    0.60   0
   5  16  -3   12.17    0.67   0
   5  19  -2   11.99    0.81   0
   5  21  -1    0.12    0.83   0
   5  24   1    2.10    0.97   0
   6 -19  10    1.76    0.52   0
   6 -11   2    1.72    0.15   0
   6  13  -4    7.45    0.63   0
   6  17  -3   20.11    0.79   0
   6  19  -2    1.87    0.68   0
   6  21  -1   -0.38    0.76   0
   6  23   0   -1.06    0.96   0
   7 -21  13    2.04    0.69   0
   7 -19  10    1.74    0.54   0
   7  -7  -1    1.94    0.17   0
   7  -2  -3   38.02    0.34   0
   7   2  -4   43.33    0.46   0
   7  13  -4    4.40    0.58   0
   7  14  -4   37.23    0.81   0
   7  23   0   -0.22    0.89   0
   8 -19  10    1.63    0.54   0
   8  -7  -1   31.68    0.27   0
   8  -5  -2    6.41    0.28   0
   8  -2  -3    3.27    0.34   0
   8   2  -4    9.88    0.45   0
   8  13  -4    3.58    0.63   0
   8  14  -4    5.52    0.80   0
   8  17  -3    1.99    0.76   0
   8  23   0    1.06    0.97   0
   9  -2  -3   37.64    0.48   0
   9   2  -4   42.78    0.59   0
   9  13  -4    8.63    0.68   0
   9  14  -4   28.17    0.91   0
   9  19  -2    0.84    0.84   0
  10 -10   1    2.06    0.23   0
  10  -4  -2   15.60    0.44   0
  10  -1  -3    4.71    0.48   0
  10   3  -4   22.71    0.64   0
  10   4  -4   10.28    0.64   0
  10  11  -4    2.79    0.69   0
  10  12  -4   32.68    0.93   0
  10  13  -4    2.56    0.86   0
  10  16  -3    4.62    0.82   0
  11   0  -3    7.55    0.58   0
  11   5  -4    0.55    0.68   0
  11   6  -4    3.01    0.74   0
  11   7  -4    4.99    0.79   0
  11   8  -4    6.08    0.81   0
  11   9  -4    3.85    0.84   0
  11  10  -4    6.32    0.88   0
  12  -2  -2    7.99    0.63   0
  12   2  -3    3.90    0.72   0
  12  12  -3    2.65    0.85   0
  12  16  -2   -0.50    1.04   0
  13 -12   4    9.00    0.33   0
  13  -3  -1    3.39    0.67   0
  13   0  -2    7.14    0.73   0
  13   5  -3    5.16    0.85   0
  13   6  -3    3.08    0.93   0
  13   7  -3    5.53    0.95   0
  13   8  -3    4.25    0.99   0
  13   9  -3    5.16    1.04   0
  14  -8   2    5.68    0.60   0
  14  -6   1    1.11    0.61   0
  14  -4   0    2.65    0.70   0
  14  -1  -1    1.55    0.77   0
  14   3  -2   10.53    0.94   0
  14   4  -2   24.98    1.03   0
  14   5  -2    2.83    0.95   0
  14   9  -2    1.39    0.98   0
  -8  -1  22    1.18    0.70   0
  -8  -1  23    1.33    0.94   0
  -8   0  21   -0.27    0.75   0
  -8   0  22    0.21    0.86   0
  -8   1  20   17.91    0.73   0
  -8   1  21    4.19    0.76   0
  -8   2  20    0.55    0.70   0
  -8   3  19    0.55    0.63   0
  -8   4  19    6.67    0.70   0
  -8   5  19   -0.47    0.65   0
  -8   6  19    9.25    0.67   0
  -8   7  19    0.36    0.65   0
  -8   8  19    2.31    0.62   0
  -8   9  20    5.98    0.69   0
  -7  -7  23    2.22    0.87   0
  -7  -7  24    0.32    1.08   0
  -7  -6  21    0.77    0.83   0
  -7  -6  22   -0.84    0.90   0
  -7  -5  19    2.74    0.65   0
  -7  -5  20    7.82    0.81   0
  -7  -4  18   20.66    0.73   0
  -7  -3  17   10.42    0.67   0
  -7  -2  16   20.69    0.63   0
  -7   0  15    4.64    0.53   0
  -7   2  14   46.94    0.58   0
  -7   6  13   11.86    0.41   0
  -6 -10  22    5.03    0.86   0
  -6 -10  23    1.13    1.09   0
  -6  -9  20    0.30    0.88   0
  -6  -8  18   15.73    0.78   0
  -6  -7  17    6.20    0.72   0
  -6  -6  15   39.32    0.62   0
  -6  -5  14    6.76    0.50   0
  -6  -2  12   63.43    0.59   0
  -6   0  11    5.69    0.42   0
  -6   3  10    4.07    0.38   0
  -6  10  10    2.15    0.26   0
  -6  15  11    0.06    0.02   0
  -5 -13  23    7.56    0.97   0
  -5 -12  20   16.34    0.80   0
  -5 -12  21    1.57    0.93   0
  -5 -11  18    0.41    0.67   0
  -5 -10  16    7.18    0.63   0
  -5  -9  15   14.39    0.69   0
  -5  -8  14    9.19    0.65   0
  -5  -7  13    7.18    0.57   0
  -5  -6  12    6.04    0.53   0
  -5  -5  11    4.84    0.49   0
  -5  -2   9  112.21    0.50   0
  -5   5   7   79.75    0.33   0
  -5   8   7   72.22    0.26   0
  -4 -15  22   -0.22    0.88   0
  -4 -15  23    2.11    1.07   0
  -4 -14  19    3.73    0.76   0
  -4 -14  20    1.05    0.94   0
  -4 -13  17    0.71    0.65   0
  -4 -13  18   12.72    0.85   0
  -4 -12  16   11.76    0.77   0
  -4 -11  14    4.57    0.56   0
  -4 -10  13    1.07    0.60   0
  -4  -9  12   15.86    0.58   0
  -4  -8  11    6.45    0.54   0
  -4  -6   9    5.23    0.36   0
  -4   0   6  453.37    0.65   0
  -4  19   8   -0.12    0.30   0
  -3 -16  20    1.21    0.94   0
  -3 -15  18    1.50    0.81   0
  -3 -14  16    0.14    0.73   0
  -3 -13  14    1.23    0.56   0
  -3  -6   7  206.63    0.59   0
  -3  12   3   78.22    0.26   0
  -2 -18  21   -0.20    0.91   0
  -2 -18  22    4.99    1.16   0
  -2 -17  18    0.85    0.74   0
  -2 -17  19    1.27    0.92   0
  -2 -16  16    2.26    0.65   0
  -2 -14  13   34.34    0.74   0
  -2  -7   6   17.07    0.40   0
  -2  17   3    5.81    0.39   0
  -2  22   6    3.76    0.52   0
  -2  23   7    0.57    0.56   0
  -2  24   8    1.51    0.61   0
  -1 -19  20    1.83    0.86   0
  -1 -19  21    1.41    1.08   0
  -1 -15  12   26.48    0.57   0
  -1 -14  11   13.98    0.56   0
  -1  -9   6    7.04    0.40   0
  -1  10   0   14.78    0.23   0
  -1  11   0   70.81    0.34   0
  -1  15   1   17.84    0.34   0
  -1  18   2   10.62    0.44   0
  -1  20   3   10.09    0.50   0
  -1  24   6    3.03    0.67   0
  -1  25   7   -0.93    0.69   0
   0 -19  17    5.40    0.73   0
   0 -16  12   33.22    0.68   0
   0 -13   8    9.82    0.37   0
   0 -12   7    9.24    0.35   0
   0   5  -1 9999.99    2.00   0
   0  11  -1  137.13    0.46   0
   0  16   0  245.56    0.76   0
   0  22   3    2.29    0.64   0
   0  23   4   -0.36    0.58   0
   1 -20  17    0.32    0.72   0
   1 -17  12    0.19    0.59   0
   1 -15   9   11.11    0.50   0
   1 -14   8  125.90    0.64   0
   1 -13   7   45.18    0.45   0
   1 -12   6   43.31    0.41   0
   1   5  -2  149.15    0.39   0
   1   6  -2   26.29    0.25   0
   1  10  -2    9.41    0.29   0
   1  11  -2   26.08    0.39   0
   1  16  -1   16.93    0.48   0
   1  22   2    1.51    0.63   0
   1  26   5   -0.44    0.86   0
   2 -21  18    0.72    0.94   0
   2 -18  12    6.34    0.63   0
   2 -16   9    6.78    0.48   0
   2 -15   8    6.36    0.41   0
   2  -8   2   16.91    0.23   0
   2   1  -2   20.96    0.19   0
   2  18  -1    4.00    0.55   0
   2  20   0    5.98    0.63   0
   2  22   1    3.77    0.68   0
   2  25   3    1.24    0.89   0
   2  26   4    1.99    0.94   0
   3 -21  16   -0.24    0.82   0
   3 -20  14   -0.05    0.71   0
   3 -18  11    4.30    0.61   0
   3 -14   6    5.56    0.37   0
   3 -13   5    2.39    0.32   0
   3  13  -3   55.44    0.49   0
   3  14  -3   20.29    0.54   0
   3  17  -2    1.14    0.57   0
   3  20  -1    5.15    0.64   0
   3  23   1    2.12    0.77   0
   3  26   3    3.20    1.02   0
   4 -21  15    3.89    0.76   0
   4 -10   2   25.23    0.19   0
   4   6  -4  246.19    0.67   0
   4   7  -4   29.75    0.40   0
   4   8  -4   11.85    0.37   0
   4   9  -4   38.79    0.43   0
   4  10  -4  256.28    0.79   0
   4  11  -4    9.57    0.50   0
   4  16  -3    3.16    0.61   0
   4  19  -2    1.44    0.71   0
   4  21  -1   -1.12    0.75   0
   4  24   1    1.58    0.90   0
   5 -19  11    5.04    0.58   0
   5 -16   7    0.32    0.41   0
   5 -13   4    2.04    0.26   0
   5  -4  -2   16.01    0.20   0
   5  -1  -3   22.31    0.27   0
   5   3  -4    4.72    0.37   0
   5  13  -4    3.01    0.48   0
   5  17  -3   -0.02    0.68   0
   5  20  -2   11.82    0.82   0
   5  22  -1    0.59    0.83   0
   5  23   0    2.50    0.78   0
   5  25   1   -0.08    0.97   0
   6 -21  14    2.69    0.75   0
   6 -20  12    1.48    0.64   0
   6  -2  -3   40.07    0.32   0
   6   2  -4  139.50    0.50   0
   6  14  -4    3.80    0.56   0
   6  15  -4    8.70    0.71   0
   6  18  -3   13.90    0.83   0
   6  20  -2    9.64    0.77   0
   6  22  -1    6.93    0.81   0
   7  -5  -2    1.94    0.23   0
   7   1  -4   43.55    0.44   0
   7  15  -4    2.54    0.64   0
   7  18  -3    0.56    0.68   0
   8   1  -4   24.39    0.46   0
   8   7  -5    0.80    0.56   0
   8   8  -5   13.05    0.63   0
   8   9  -5   38.79    0.72   0
   8  15  -4   30.61    0.77   0
   8  16  -4    7.39    0.83   0
   8  18  -3    5.57    0.79   0
   9 -18   9    0.31    0.46   0
   9  -7  -1   12.75    0.30   0
   9  -5  -2   45.93    0.42   0
   9   1  -4   31.92    0.54   0
   9  15  -4    3.15    0.88   0
   9  18  -3   -0.28    0.82   0
  10 -17   8    0.08    0.37   0
  10  -2  -3   14.29    0.51   0
  10   2  -4   25.28    0.61   0
  10  14  -4    7.10    0.90   0
  10  17  -3    0.77    0.86   0
  11 -11   2    1.18    0.23   0
  11  -8   0    1.11    0.37   0
  11  -6  -1   15.78    0.44   0
  11  -1  -3    1.25    0.59   0
  11   3  -4    4.05    0.65   0
  11   4  -4    0.31    0.69   0
  11  11  -4    1.06    0.76   0
  11  13  -4    5.66    1.00   0
  11  16  -3   10.60    0.97   0
  12  -7   0    4.02    0.45   0
  12  -5  -1    9.71    0.51   0
  12   1  -3    4.34    0.70   0
  12   7  -4    8.67    0.85   0
  12   8  -4    7.39    0.91   0
  12   9  -4    0.63    0.87   0
  13  -6   0    1.81    0.56   0
  13  -4  -1    0.42    0.64   0
  13  -1  -2    1.90    0.73   0
  13   3  -3    0.71    0.81   0
  13   4  -3    1.58    0.85   0
  13  11  -3    4.13    0.96   0
  14  -2  -1   -1.25    0.80   0
  14   2  -2    3.92    0.90   0
  -8   0  23    3.15    0.86   0
  -8   1  22    8.56    0.86   0
  -8   1  23   -0.38    0.89   0
  -8   2  21   -0.03    0.76   0
  -8   2  22    5.46    0.83   0
  -8   3  20   13.84    0.71   0
  -8   3  21    3.51    0.74   0
  -8   4  20   16.28    0.73   0
  -8   4  21    2.08    0.81   0
  -8   5  20    7.79    0.74   0
  -8   6  20    0.69    0.69   0
  -8   7  20   -0.05    0.68   0
  -8   8  20    7.60    0.68   0
  -7  -6  23   -0.78    0.84   0
  -7  -6  24   13.25    1.11   0
  -7  -5  21    1.09    0.86   0
  -7  -5  22    7.62    0.91   0
  -7  -4  19    3.42    0.73   0
  -7  -4  20   10.05    0.81   0
  -7  -3  18    2.86    0.68   0
  -7  -2  17    1.26    0.63   0
  -7  -1  16    4.81    0.61   0
  -7   1  15    2.40    0.52   0
  -7   3  14    7.88    0.48   0
  -7   4  14   28.45    0.54   0
  -7   9  14    0.12    0.40   0
  -7  10  14   -0.09    0.37   0
  -7  12  15   11.38    0.41   0
  -6 -10  24   14.76    1.01   0
  -6  -9  21    1.73    0.77   0
  -6  -9  22   -0.09    0.98   0
  -6  -9  23    2.11    1.02   0
  -6  -8  19    0.42    0.67   0
  -6  -8  20    4.50    0.85   0
  -6  -7  18    3.58    0.74   0
  -6  -6  16   15.48    0.60   0
  -6  -5  15    9.50    0.66   0
  -6  -4  14    4.11    0.56   0
  -6  -3  13   23.82    0.49   0
  -6  -1  12    3.28    0.47   0
  -6   1  11    6.74    0.40   0
  -6   4  10    7.52    0.32   0
  -6   5  10   12.95    0.33   0
  -6   9  10   17.01    0.30   0
  -5 -12  22    2.44    1.01   0
  -5 -12  23    2.49    1.11   0
  -5 -11  19    9.62    0.70   0
  -5 -11  20    2.92    0.85   0
  -5 -10  17   15.94    0.66   0
  -5  -9  16    3.07    0.71   0
  -5  -3  10   37.83    0.49   0
  -5  -1   9   19.32    0.41   0
  -5   1   8   37.53    0.36   0
  -5   6   7    3.24    0.22   0
  -5   7   7   44.68    0.25   0
  -4 -14  21    2.64    0.81   0
  -4 -14  22   -0.09    1.04   0
  -4 -13  19    9.94    0.92   0
  -4 -12  17   10.83    0.79   0
  -4 -11  15   14.57    0.72   0
  -4  -4   8    8.97    0.34   0
  -4  -2   7   15.71    0.37   0
  -4   4   5  319.23    0.41   0
  -3 -16  21    1.58    0.88   0
  -3 -16  22   -0.95    1.11   0
  -3 -16  23   -0.11    1.09   0
  -3 -15  19    2.49    0.89   0
  -3 -14  17    4.41    0.76   0
  -3 -13  15   18.93    0.76   0
  -3 -12  13   14.46    0.55   0
  -3  -8   9    0.25    0.43   0
  -3  -7   8    6.97    0.36   0
  -3  -4   6    7.31    0.30   0
  -3  -2   5  226.72    0.49   0
  -3  18   5    3.52    0.34   0
  -3  21   7    1.62    0.42   0
  -3  22   8    3.27    0.45   0
  -2 -17  20   -1.61    0.98   0
  -2 -16  17    0.80    0.68   0
  -2 -15  15    3.07    0.60   0
  -2 -13  12    7.07    0.52   0
  -2 -12  11   16.69    0.57   0
  -2  -8   7  171.16    0.61   0
  -2   2   2   85.81    0.17   0
  -2  21   5    1.14    0.47   0
  -1 -18  19    0.64    0.96   0
  -1 -17  16    5.18    0.65   0
  -1 -15  13    2.53    0.66   0
  -1 -13  10   15.97    0.47   0
  -1 -12   9   12.33    0.48   0
  -1 -11   8   19.00    0.45   0
  -1 -10   7    4.85    0.40   0
  -1  -6   4  129.94    0.42   0
  -1   5   0   76.23    0.18   0
  -1  12   0    6.27    0.29   0
  -1  16   1   35.30    0.42   0
  -1  22   4    1.10    0.58   0
  -1  23   5    2.88    0.59   0
   0 -20  21    0.20    0.95   0
   0 -19  18    2.48    0.74   0
   0 -18  16   12.59    0.82   0
   0 -17  14    1.59    0.70   0
   0 -15  11   -0.65    0.56   0
   0  -8   4  430.70    0.64   0
   0  12  -1    2.77    0.32   0
   0  19   1    9.05    0.55   0
   0  21   2    3.64    0.58   0
   0  25   5   -0.49    0.72   0
   0  26   6    2.74    0.80   0
   1 -20  18   10.22    0.78   0
   1 -19  16    1.86    0.82   0
   1 -18  14   -0.25    0.67   0
   1 -16  11    3.65    0.54   0
   1  12  -2   63.86    0.47   0
   1  19   0    4.88    0.53   0
   1  21   1    4.04    0.60   0
   1  24   3    9.24    0.71   0
   1  25   4   -0.23    0.72   0
   2 -21  19   -0.57    0.99   0
   2 -19  14    4.78    0.72   0
   2 -17  11   10.06    0.54   0
   2   6  -3  153.71    0.47   0
   2   7  -3   10.23    0.30   0
   2   8  -3   69.25    0.39   0
   2   9  -3   30.57    0.36   0
   2  10  -3    6.61    0.40   0
   2  11  -3  122.50    0.56   0
   2  16  -2    4.24    0.50   0
   2  19  -1    1.59    0.57   0
   2  21   0    0.44    0.62   0
   2  24   2    0.53    0.74   0
   3 -21  17    4.60    0.88   0
   3 -20  15   19.43    0.78   0
   3 -19  13    4.91    0.65   0
   3  -9   2    2.13    0.18   0
   3   2  -3   59.95    0.33   0
   3  15  -3    7.28    0.55   0
   3  18  -2   26.06    0.68   0
   3  22   0    3.48    0.70   0
   3  24   1   -0.11    0.78   0
   3  25   2    0.95    0.86   0
   4 -20  14   11.98    0.81   0
   4 -17   9   11.09    0.51   0
   4  -3  -2   42.45    0.19   0
   4   0  -3   17.87    0.25   0
   4   5  -4   18.41    0.35   0
   4  12  -4   17.88    0.46   0
   4  13  -4   20.17    0.56   0
   4  17  -3    0.10    0.64   0
   4  23   0    0.73    0.84   0
   4  25   1   -0.36    0.91   0
   4  26   2    1.14    1.03   0
   5 -15   6   11.95    0.35   0
   5 -14   5    8.64    0.31   0
   5   2  -4   85.44    0.44   0
   5  14  -4   22.05    0.55   0
   5  15  -4    4.42    0.66   0
   5  18  -3    1.68    0.71   0
   5  24   0    5.34    1.03   0
   6 -17   8    3.28    0.44   0
   6   1  -4   38.89    0.40   0
   6   7  -5    3.93    0.48   0
   6   8  -5   11.03    0.53   0
   6   9  -5    5.74    0.55   0
   6  10  -5    6.11    0.58   0
   6  16  -4   15.34    0.78   0
   6  19  -3   10.72    0.87   0
   7 -21  14    0.28    0.75   0
   7 -20  12    4.26    0.63   0
   7 -18   9    2.81    0.48   0
   7  -3  -3   34.19    0.33   0
   7   0  -4   19.80    0.41   0
   7   5  -5   12.48    0.50   0
   7   6  -5   21.04    0.54   0
   7   7  -5    0.60    0.43   0
   7   8  -5   14.65    0.50   0
   7   9  -5    6.03    0.49   0
   7  10  -5   33.14    0.59   0
   7  11  -5   13.68    0.67   0
   7  12  -5   23.12    0.72   0
   7  16  -4   19.35    0.71   0
   7  17  -4    2.17    0.78   0
   7  19  -3    2.25    0.73   0
   7  23  -1   -0.32    0.91   0
   8 -20  12    8.02    0.61   0
   8 -18   9    0.49    0.43   0
   8  -9   0   10.51    0.16   0
   8  -3  -3   13.20    0.35   0
   8   0  -4   72.30    0.51   0
   8   5  -5    2.82    0.54   0
   8   6  -5   11.27    0.48   0
   8  10  -5   13.44    0.59   0
   8  11  -5    2.26    0.57   0
   8  12  -5   14.15    0.77   0
   8  17  -4    7.18    0.93   0
   8  19  -3    0.48    0.82   0
   8  23  -1    3.30    1.02   0
   9  -3  -3    7.64    0.41   0
   9   0  -4    3.49    0.49   0
   9   5  -5    1.49    0.60   0
   9   6  -5   23.06    0.68   0
   9   7  -5    9.76    0.58   0
   9   8  -5    3.53    0.59   0
   9   9  -5    7.68    0.58   0
   9  10  -5   11.27    0.62   0
   9  11  -5   16.67    0.76   0
   9  12  -5   15.84    0.81   0
   9  16  -4    1.24    0.75   0
   9  19  -3    0.23    0.87   0
  10  -7  -1    1.19    0.34   0
  10  -5  -2    1.97    0.39   0
  10   1  -4    3.18    0.54   0
  10   7  -5    1.97    0.74   0
  10   8  -5    4.30    0.76   0
  10   9  -5    9.68    0.80   0
  10  10  -5    2.76    0.79   0
  10  15  -4    8.11    0.81   0
  10  16  -4   12.64    1.05   0
  11  -4  -2   61.24    0.57   0
  11   2  -4   10.21    0.66   0
  11  14  -4   11.22    0.90   0
  12  -9   1    2.52    0.39   0
  12  -3  -2    5.78    0.57   0
  12   0  -3    9.97    0.68   0
  12   4  -4    1.00    0.77   0
  12   5  -4    6.38    0.81   0
  12   6  -4   12.30    0.71   0
  12  11  -4    1.24    0.81   0
  12  16  -3    2.28    1.07   0
  13 -11   3    9.35    0.38   0
  13  -8   1    9.19    0.50   0
  13  -2  -2   10.39    0.72   0
  13   2  -3    7.12    0.80   0
  14  -7   1    0.93    0.62   0
  14  -5   0    2.14    0.68   0
  14   0  -2    4.68    0.90   0
  14   1  -2    3.42    0.85   0
  14   5  -3    0.13    0.92   0
  14   6  -3    1.00    1.01   0
  14   7  -3   -0.12    1.05   0
  -8   2  23    1.30    0.87   0
  -8   3  22   12.31    0.83   0
  -8   4  22   -0.18    0.77   0
  -8   5  21   -0.33    0.70   0
  -8   5  22    0.10    0.83   0
  -8   6  21    4.73    0.68   0
  -8   7  21    0.19    0.73   0
  -7  -5  23    1.08    0.82   0
  -7  -5  24    0.14    1.04   0
  -7  -4  21    3.23    0.87   0
  -7  -4  22    3.13    0.92   0
  -7  -3  19    2.87    0.71   0
  -7  -3  20    1.68    0.80   0
  -7  -2  18   20.30    0.72   0
  -7  -1  17    8.74    0.64   0
  -7   0  16    5.79    0.58   0
  -7   1  16    0.04    0.61   0
  -7   2  15   39.44    0.58   0
  -7   3  15    4.19    0.55   0
  -7   5  14    2.15    0.46   0
  -7   6  14   19.66    0.48   0
  -7   7  14    0.74    0.42   0
  -7  11  15    5.67    0.43   0
  -7  13  16    5.64    0.42   0
  -7  14  17    4.01    0.45   0
  -6  -9  24    0.11    0.95   0
  -6  -8  21    0.59    0.90   0
  -6  -8  22    6.57    0.94   0
  -6  -7  19    2.77    0.80   0
  -6  -6  17    2.25    0.69   0
  -6  -5  16    6.21    0.68   0
  -6  -4  15    6.05    0.63   0
  -6  -3  14   19.26    0.59   0
  -6  -2  13    9.07    0.53   0
  -6   0  12    2.02    0.44   0
  -6   2  11   22.43    0.41   0
  -6   6  10   30.62    0.34   0
  -6   7  10   10.24    0.32   0
  -6   8  10   87.62    0.39   0
  -6  12  11    8.44    0.27   0
  -6  14  12    8.95    0.28   0
  -5 -12  24    6.92    1.00   0
  -5 -11  21    1.92    0.90   0
  -5 -11  22   -0.46    1.01   0
  -5 -10  18   22.33    0.69   0
  -5 -10  19    1.19    0.82   0
  -5  -9  17    7.01    0.75   0
  -5  -8  15   35.75    0.64   0
  -5  -7  14    5.13    0.62   0
  -5  -6  13   69.38    0.66   0
  -5  -5  12   13.36    0.54   0
  -5  -4  11   14.65    0.41   0
  -5   2   8   18.26    0.32   0
  -4 -14  23    2.89    0.94   0
  -4 -14  24    1.76    1.12   0
  -4 -13  20   11.67    0.90   0
  -4 -13  21    2.40    0.90   0
  -4 -12  18   37.74    0.90   0
  -4 -11  16    9.38    0.75   0
  -4 -10  14    4.40    0.54   0
  -4  -9  13    2.18    0.58   0
  -4  -8  12    3.95    0.55   0
  -4  -7  11    3.74    0.51   0
  -4  -5   9    5.68    0.35   0
  -4   1   6   26.08    0.34   0
  -4   5   5    1.91    0.18   0
  -4  13   5    1.20    0.13   0
  -3 -15  20    1.35    0.78   0
  -3 -15  21    6.75    0.94   0
  -3 -14  18    2.47    0.85   0
  -3 -13  16    1.28    0.74   0
  -3 -12  14    3.32    0.65   0
  -3  -5   7   35.86    0.44   0
  -3   1   4   57.99    0.27   0
  -3   6   3    5.09    0.09   0
  -3  16   4   36.26    0.32   0
  -2 -17  21    2.04    0.90   0
  -2 -17  22    0.42    1.12   0
  -2 -16  18   16.07    0.74   0
  -2 -16  19    6.32    0.91   0
  -2 -15  16    1.07    0.61   0
  -2 -14  14   10.31    0.58   0
  -2 -13  13    1.77    0.61   0
  -2 -11  10    4.43    0.41   0
  -2 -10   9    4.46    0.37   0
  -2  -9   8    1.42    0.34   0
  -2  -5   5    3.33    0.27   0
  -2  -1   3   29.53    0.24   0
  -2   8   1   21.27    0.16   0
  -2   9   1   24.13    0.20   0
  -1 -18  20    2.69    0.98   0
  -1 -18  21    0.34    1.03   0
  -1 -17  17    2.79    0.68   0
  -1 -16  15   20.58    0.65   0
  -1 -14  12    2.84    0.58   0
  -1  -4   3   92.88    0.34   0
  -1  -2   2   87.00    0.25   0
  -1  19   2    8.15    0.46   0
   0 -18  17    6.80    0.85   0
   0 -16  13    5.64    0.68   0
   0 -14  10  114.34    0.71   0
   0 -13   9   18.72    0.48   0
   0  -9   5   30.08    0.37   0
   0   4  -1    1.43    0.18   0
   0  17   0    1.21    0.42   0
   0  23   3    5.19    0.65   0
   0  24   4    6.38    0.63   0
   1 -19  17    8.10    0.88   0
   1 -17  13    6.17    0.66   0
   1 -15  10    3.52    0.51   0
   1   0  -1  170.80    0.18   0
   1   4  -2   48.76    0.29   0
   1  13  -2    7.19    0.39   0
   1  14  -2   51.42    0.47   0
   1  17  -1    2.71    0.49   0
   1  23   2    1.56    0.65   0
   2 -19  15    2.51    0.73   0
   2 -18  13    0.86    0.63   0
   2 -16  10   19.39    0.53   0
   2   5  -3   58.00    0.35   0
   2  12  -3   14.93    0.38   0
   2  13  -3   72.38    0.54   0
   2  17  -2    2.56    0.55   0
   2  23   1    3.34    0.72   0
   2  26   3    2.05    0.90   0
   3 -21  18    0.15    0.92   0
   3   9  -4   45.79    0.48   0
   3  16  -3    1.01    0.56   0
   3  19  -2    2.05    0.65   0
   3  21  -1    0.12    0.68   0
   3  23   0    1.68    0.77   0
   4 -16   8    8.66    0.45   0
   4   4  -4   48.29    0.37   0
   4  14  -4   17.65    0.60   0
   4  18  -3    5.88    0.69   0
   4  20  -2   79.21    0.82   0
   4  22  -1    0.01    0.67   0
   4  24   0    0.12    0.91   0
   5 -18  10   33.71    0.60   0
   5   9  -5    0.68    0.47   0
   5  16  -4   14.07    0.72   0
   5  19  -3    6.54    0.75   0
   5  21  -2    5.69    0.73   0
   5  23  -1    1.26    0.89   0
   6 -21  15    0.17    0.78   0
   6 -19  11    2.74    0.56   0
   6 -16   7    5.65    0.40   0
   6  -5  -2   10.84    0.20   0
   6   5  -5    2.57    0.44   0
   6   6  -5   53.96    0.47   0
   6  11  -5   11.74    0.50   0
   6  12  -5   17.07    0.53   0
   6  13  -5   14.57    0.68   0
   6  17  -4   22.62    0.81   0
   6  20  -3    2.26    0.89   0
   7 -17   8    3.09    0.40   0
   7   4  -5  124.16    0.64   0
   7  13  -5   11.01    0.61   0
   7  14  -5    6.93    0.73   0
   7  18  -4    5.24    0.84   0
   7  20  -3    0.54    0.79   0
   7  22  -2    3.23    0.88   0
   8   3  -5   10.28    0.48   0
   8   4  -5   25.82    0.46   0
   8  13  -5    0.67    0.64   0
   8  14  -5    8.45    0.78   0
   9  -9   0    2.55    0.21   0
   9   4  -5    2.55    0.58   0
   9  13  -5    1.18    0.68   0
   9  14  -5    1.32    0.85   0
   9  20  -3    1.53    0.94   0
  10  -3  -3    0.92    0.44   0
  10   0  -4   34.80    0.59   0
  10   4  -5    1.14    0.62   0
  10   5  -5    0.41    0.69   0
  10   6  -5   29.01    0.65   0
  10  11  -5   16.62    0.73   0
  10  12  -5    5.51    0.72   0
  10  13  -5    0.86    0.90   0
  10  17  -4   -0.45    0.84   0
  11  -2  -3    9.45    0.51   0
  11   1  -4    2.87    0.59   0
  11   6  -5   32.09    0.82   0
  11   7  -5   16.01    0.83   0
  11   8  -5   24.31    0.86   0
  11   9  -5    9.86    0.86   0
  11  10  -5    2.90    0.87   0
  11  11  -5    0.81    0.91   0
  11  16  -4    0.07    0.92   0
  12  -6  -1    0.50    0.50   0
  12  -1  -3    4.93    0.59   0
  12   2  -4   14.19    0.78   0
  12   3  -4    3.05    0.75   0
  12  14  -4    3.04    0.95   0
  13   1  -3   -0.16    0.74   0
  13   5  -4    8.45    0.88   0
  13   6  -4    2.69    0.92   0
  13   7  -4    2.51    0.96   0
  14  -3  -1    1.58    0.72   0
  14  -1  -2    1.12    0.83   0
  14   3  -3    1.77    0.93   0
  14   4  -3    7.99    0.99   0
  -7  -4  23    2.29    0.90   0
  -7  -4  24    0.30    1.03   0
  -7  -3  21    2.24    0.84   0
  -7  -3  22    0.90    0.87   0
  -7  -2  19    0.39    0.68   0
  -7  -2  20    4.49    0.74   0
  -7  -1  18   -0.76    0.65   0
  -7   0  17    5.40    0.62   0
  -7   5  15    2.79    0.51   0
  -7  10  15    2.72    0.42   0
  -7  12  16   14.24    0.47   0
  -7  14  18    5.04    0.53   0
  -6  -8  23    1.76    0.87   0
  -6  -8  24    7.43    1.07   0
  -6  -7  20    1.54    0.70   0
  -6  -7  21    0.58    0.88   0
  -6  -6  18   21.36    0.66   0
  -6  -6  19    9.48    0.77   0
  -6  -5  17    4.70    0.69   0
  -6  -4  16   64.17    0.75   0
  -6  -2  14    9.02    0.53   0
  -6  -1  13   72.22    0.62   0
  -6   1  12   12.20    0.47   0
  -6   3  11   33.21    0.40   0
  -5 -11  23    7.90    0.90   0
  -5 -11  24   -0.01    1.08   0
  -5 -10  20    5.27    0.86   0
  -5 -10  21   13.24    0.93   0
  -5  -9  18    4.78    0.76   0
  -5  -8  16    7.50    0.57   0
  -5  -7  15    4.00    0.65   0
  -5  -3  11   32.16    0.50   0
  -5  -2  10  192.84    0.61   0
  -5   0   9   50.66    0.43   0
  -5   3   8   20.83    0.33   0
  -4 -13  22    1.53    0.97   0
  -4 -13  23    0.28    1.05   0
  -4 -12  19    9.80    0.87   0
  -4 -11  17    4.43    0.76   0
  -4 -10  15    9.83    0.57   0
  -4  -3   8   27.71    0.36   0
  -4  -1   7   27.72    0.36   0
  -4   6   5    6.79    0.17   0
  -4  16   6   42.20    0.24   0
  -4  18   7    5.37    0.26   0
  -3 -15  22    1.19    0.86   0
  -3 -15  23    0.90    1.09   0
  -3 -14  19    1.03    0.83   0
  -3 -13  17    4.23    0.73   0
  -3 -12  15   19.40    0.72   0
  -3 -11  13    1.40    0.50   0
  -3  -6   8   34.68    0.47   0
  -3  13   3   -0.25    0.20   0
  -3  20   6    2.41    0.36   0
  -2 -17  23    0.80    0.94   0
  -2 -15  17   -0.43    0.63   0
  -2 -14  15   17.73    0.62   0
  -2 -12  12   30.12    0.62   0
  -2  -6   6    7.95    0.37   0
  -2  -3   4   14.95    0.24   0
  -2   7   1   15.06    0.13   0
  -2  10   1    9.51    0.19   0
  -2  18   3    2.74    0.35   0
  -2  23   6    0.17    0.53   0
  -2  24   7    0.36    0.55   0
  -2  25   8   -0.73    0.60   0
  -1 -18  22    3.05    1.09   0
  -1 -17  18    0.96    0.74   0
  -1 -16  16    5.01    0.63   0
  -1 -15  14    1.21    0.54   0
  -1 -13  11    1.60    0.45   0
  -1  -7   5   64.32    0.36   0
  -1  13   0   21.76    0.30   0
  -1  17   1   19.41    0.43   0
  -1  21   3    2.68    0.50   0
  -1  24   5    1.92    0.61   0
  -1  25   6   -0.58    0.65   0
   0 -19  21    0.29    0.88   0
   0 -15  12    3.35    0.59   0
   0 -12   8  191.34    0.68   0
   0 -11   7   10.66    0.40   0
   0 -10   6   78.86    0.42   0
   0  -6   3    5.76    0.24   0
   0  20   1    0.52    0.50   0
   0  22   2   15.01    0.66   0
   1 -19  18    1.92    0.90   0
   1 -14   9   24.26    0.51   0
   1  15  -2   12.88    0.44   0
   1  18  -1    4.39    0.50   0
   1  20   0    1.91    0.53   0
   1  22   1    9.05    0.63   0
   1  25   3    4.08    0.73   0
   1  26   4    5.63    0.80   0
   2 -17  12    0.29    0.55   0
   2 -15   9   -0.42    0.45   0
   2  -9   3   48.20    0.29   0
   2  14  -3   46.21    0.54   0
   2  20  -1    0.99    0.59   0
   2  22   0   -0.41    0.68   0
   2  24   1    7.31    0.81   0
   2  25   2   -0.45    0.80   0
   3 -19  14    0.69    0.67   0
   3 -18  12    3.02    0.58   0
   3   1  -3    0.55    0.24   0
   3   6  -4    9.43    0.38   0
   3   7  -4   59.48    0.41   0
   3   8  -4   84.00    0.46   0
   3  10  -4   17.32    0.39   0
   3  11  -4   25.74    0.40   0
   3  12  -4   70.27    0.57   0
   3  17  -3    1.39    0.59   0
   3  20  -2    3.64    0.67   0
   3  22  -1    2.48    0.73   0
   3  25   1    0.44    0.86   0
   3  26   2    1.39    0.89   0
   4 -20  15    6.00    0.73   0
   4 -15   7   13.60    0.41   0
   4 -14   6   12.68    0.34   0
   4 -11   3  109.10    0.32   0
   4   3  -4   27.24    0.31   0
   4  15  -4   44.97    0.58   0
   4  16  -4    1.92    0.61   0
   4  19  -3    1.72    0.69   0
   4  21  -2    1.82    0.75   0
   4  23  -1    0.64    0.88   0
   4  26   1    0.36    1.00   0
   5 -21  16    0.47    0.78   0
   5 -19  12    0.99    0.55   0
   5 -17   9   10.88    0.48   0
   5  -9   1   68.79    0.16   0
   5  -2  -3   97.10    0.33   0
   5   1  -4    5.87    0.32   0
   5   6  -5    5.60    0.43   0
   5   7  -5    4.89    0.36   0
   5   8  -5   17.18    0.41   0
   5  10  -5   20.34    0.48   0
   5  11  -5    1.59    0.44   0
   5  12  -5   24.62    0.60   0
   5  13  -5    2.03    0.57   0
   5  17  -4    0.60    0.57   0
   5  20  -3   -0.81    0.80   0
   5  24  -1    1.94    0.99   0
   5  25   0   -0.80    0.84   0
   6 -20  13    3.21    0.60   0
   6 -18  10    7.66    0.51   0
   6 -15   6    7.93    0.35   0
   6 -12   3    5.93    0.21   0
   6  -7  -1   11.14    0.13   0
   6  -3  -3   32.99    0.30   0
   6   0  -4   16.44    0.33   0
   6   4  -5    2.84    0.42   0
   6  14  -5   31.25    0.63   0
   6  15  -5    6.34    0.72   0
   6  18  -4   45.28    0.79   0
   7 -20  13    9.50    0.66   0
   7 -19  11   11.29    0.57   0
   7  -1  -4   24.04    0.39   0
   7   3  -5    3.18    0.42   0
   7  15  -5   34.95    0.73   0
   7  16  -5    1.06    0.77   0
   7  19  -4    5.10    0.92   0
   7  21  -3    2.03    0.84   0
   7  23  -2   -0.16    0.91   0
   8 -19  11    2.23    0.55   0
   8 -17   8    1.12    0.38   0
   8  -1  -4   59.57    0.46   0
   8   2  -5   29.90    0.49   0
   8  15  -5   12.87    0.72   0
   8  16  -5   -0.51    0.85   0
   8  19  -4   -0.41    0.78   0
   8  23  -2    0.52    1.01   0
   9 -19  11    3.18    0.56   0
   9 -17   8    0.51    0.36   0
   9  -1  -4    9.03    0.42   0
   9   2  -5   28.53    0.62   0
   9   3  -5   12.25    0.48   0
   9  15  -5    2.66    0.75   0
   9  16  -5    1.32    0.92   0
   9  21  -3    0.58    1.00   0
  10 -16   7    0.62    0.32   0
  10  -9   0    9.98    0.28   0
  10  -1  -4   12.59    0.54   0
  10   3  -5    3.07    0.58   0
  10  14  -5    5.48    0.78   0
  10  18  -4    1.03    0.92   0
  11 -10   1    6.06    0.28   0
  11  -7  -1    4.35    0.40   0
  11  -5  -2    5.19    0.45   0
  11   0  -4    5.89    0.57   0
  11   4  -5    2.53    0.70   0
  11   5  -5    4.47    0.74   0
  11  13  -5    3.85    0.83   0
  11  14  -5    8.87    1.06   0
  12  -8   0    0.60    0.43   0
  12  -4  -2    2.49    0.53   0
  12  -2  -3   22.73    0.63   0
  12   1  -4    5.65    0.74   0
  12   7  -5    4.92    0.88   0
  12   8  -5    7.09    0.93   0
  12   9  -5    3.11    0.93   0
  12  10  -5    3.74    0.95   0
  12  11  -5    2.74    0.99   0
  12  16  -4    2.76    1.04   0
  13 -10   2   11.32    0.42   0
  13  -7   0    1.28    0.53   0
  13  -5  -1    6.99    0.57   0
  13  -3  -2   10.26    0.68   0
  13   0  -3    0.73    0.69   0
  13   3  -4    3.35    0.91   0
  13   4  -4   26.50    0.93   0
  13  13  -4    1.09    1.00   0
  14  -6   0   12.73    0.69   0
  14  -4  -1    3.02    0.73   0
  14   2  -3    6.07    0.89   0
  -7  -3  23    0.40    0.79   0
  -7  -3  24    1.87    0.96   0
  -7  -2  21    2.19    0.81   0
  -7  -2  22    6.81    0.87   0
  -7  -2  23    1.60    0.88   0
  -7  -1  19    3.92    0.69   0
  -7  -1  20    1.77    0.73   0
  -7   0  18   31.44    0.72   0
  -7   0  19    2.24    0.73   0
  -7   1  17    1.51    0.60   0
  -7   2  17    7.04    0.62   0
  -7   3  16    4.48    0.52   0
  -7   4  16   37.99    0.62   0
  -7   6  15   12.03    0.51   0
  -7   7  15    4.24    0.47   0
  -7   8  15   12.47    0.46   0
  -7   9  15    6.06    0.42   0
  -7  13  17    2.09    0.48   0
  -6  -7  22    4.30    0.77   0
  -6  -7  23    1.06    0.90   0
  -6  -7  24   -0.28    1.04   0
  -6  -6  20   13.88    0.85   0
  -6  -5  18    3.09    0.73   0
  -6  -4  17    8.03    0.66   0
  -6  -3  15   11.77    0.51   0
  -6   0  13   13.17    0.49   0
  -6   4  11    3.57    0.37   0
  -6  11  11    0.72    0.28   0
  -5 -10  22   13.79    0.83   0
  -5 -10  23    9.45    1.09   0
  -5 -10  24    0.33    1.05   0
  -5  -9  19    3.05    0.67   0
  -5  -9  20    0.45    0.82   0
  -5  -8  17    8.80    0.60   0
  -5  -7  16   15.09    0.67   0
  -5  -6  14    0.02    0.47   0
  -5  -5  13   17.39    0.48   0
  -5  -4  12   22.72    0.45   0
  -5  -1  10    4.13    0.39   0
  -5   1   9   74.38    0.46   0
  -4 -13  24    1.09    0.94   0
  -4 -12  20    0.98    0.73   0
  -4 -12  21    3.38    0.93   0
  -4 -11  18    2.63    0.75   0
  -4 -10  16   50.33    0.77   0
  -4  -9  14    0.28    0.52   0
  -4  -8  13    6.87    0.47   0
  -4  -7  12   12.27    0.55   0
  -4  -6  11   15.94    0.50   0
  -4  -5  10   10.23    0.45   0
  -4  -4   9   21.27    0.37   0
  -4   2   6   50.46    0.32   0
  -4  21   9    1.32    0.33   0
  -4  22  10    1.26    0.35   0
  -3 -14  20    5.45    0.73   0
  -3 -14  21    3.82    0.97   0
  -3 -13  18   -0.70    0.79   0
  -3 -12  16   39.73    0.79   0
  -3 -11  14    0.90    0.65   0
  -3  -9  11    7.80    0.43   0
  -3  -8  10   62.73    0.49   0
  -3  -7   9    8.78    0.36   0
  -3  -3   6   29.41    0.31   0
  -3  -1   5    7.74    0.26   0
  -2 -16  21    1.97    0.83   0
  -2 -16  22    5.36    1.04   0
  -2 -16  23    2.51    1.09   0
  -2 -15  18    1.63    0.66   0
  -2 -15  19    0.32    0.83   0
  -2 -14  16   58.23    0.86   0
  -2 -13  14    0.55    0.55   0
  -2 -11  11    2.48    0.43   0
  -2 -10  10   56.09    0.57   0
  -2  -9   9    1.44    0.42   0
  -2  -8   8   39.97    0.47   0
  -2  -7   7    5.89    0.40   0
  -2  11   1   68.13    0.27   0
  -2  12   1   24.78    0.26   0
  -2  16   2   38.28    0.36   0
  -2  22   5    1.73    0.49   0
  -1 -17  20    0.99    0.93   0
  -1 -16  17   14.85    0.68   0
  -1 -14  13   20.93    0.56   0
  -1 -12  10  194.34    0.74   0
  -1 -11   9   29.39    0.49   0
  -1 -10   8    5.83    0.42   0
  -1  -9   7   47.19    0.46   0
  -1  -8   6  189.06    0.53   0
  -1  14   0   53.94    0.37   0
  -1  20   2   18.23    0.51   0
  -1  23   4    4.57    0.59   0
   0 -18  19   -0.18    0.77   0
   0 -17  16    1.24    0.63   0
   0 -16  14   31.02    0.64   0
   0 -14  11    9.59    0.55   0
   0  15  -1    0.72    0.38   0
   0  25   4    0.30    0.70   0
   0  26   5   -0.28    0.76   0
   1 -18  16   14.30    0.66   0
   1 -17  14    2.77    0.64   0
   1 -16  12    9.47    0.51   0
   1 -13   8    7.23    0.42   0
   1 -12   7   64.35    0.46   0
   1 -11   6   48.24    0.41   0
   1 -10   5   14.45    0.33   0
   1  16  -2  138.57    0.66   0
   1  19  -1    3.60    0.53   0
   1  21   0    0.99    0.59   0
   1  24   2    0.57    0.67   0
   2 -20  19    1.35    0.78   0
   2 -18  14    1.64    0.54   0
   2 -14   8    8.68    0.41   0
   2   0  -2  172.57    0.29   0
   2   4  -3  112.45    0.36   0
   2  15  -3   14.87    0.50   0
   2  19  -2    0.41    0.57   0
   2  21  -1    1.23    0.64   0
   2  23   0    1.12    0.67   0
   3 -20  17    3.08    0.82   0
   3 -19  15    4.28    0.71   0
   3 -18  13   12.57    0.63   0
   3 -17  11    6.82    0.54   0
   3 -10   3   61.30    0.28   0
   3  -2  -2   65.09    0.19   0
   3   5  -4   66.81    0.43   0
   3  13  -4   11.20    0.42   0
   3  18  -3    7.77    0.65   0
   3  24   0    3.55    0.85   0
   4 -13   5   12.52    0.30   0
   4 -12   4   10.10    0.25   0
   4  -1  -3   10.33    0.21   0
   4   2  -4  354.79    0.61   0
   4   9  -5    2.35    0.44   0
   4  10  -5   75.63    0.58   0
   4  17  -4   17.14    0.71   0
   4  20  -3    1.09    0.77   0
   4  22  -2    3.41    0.79   0
   4  24  -1    0.02    0.86   0
   4  25   0   -0.56    0.92   0
   5 -21  17    0.75    0.85   0
   5 -16   8   23.94    0.45   0
   5   5  -5    1.55    0.33   0
   5  14  -5    8.57    0.53   0
   5  15  -5   29.90    0.70   0
   5  18  -4   20.39    0.67   0
   5  21  -3   -1.54    0.85   0
   6 -20  14    2.14    0.72   0
   6 -19  12    0.41    0.60   0
   6 -14   5   17.97    0.30   0
   6 -13   4    8.43    0.25   0
   6   3  -5    4.79    0.40   0
   6  16  -5   15.50    0.76   0
   6  19  -4    8.27    0.74   0
   6  25  -1    1.67    0.95   0
   7 -16   7    9.93    0.39   0
   7   2  -5   21.17    0.43   0
   7   8  -6   10.54    0.58   0
   7   9  -6   16.20    0.62   0
   7  10  -6    7.57    0.63   0
   7  11  -6    8.09    0.70   0
   7  17  -5   15.50    0.83   0
   7  22  -3    0.69    0.87   0
   7  24  -2   -0.31    1.13   0
   8 -20  13    7.93    0.67   0
   8 -16   7    2.14    0.38   0
   8  -6  -2   68.03    0.34   0
   8  -4  -3   68.05    0.39   0
   8   7  -6    9.01    0.60   0
   8   8  -6    9.29    0.62   0
   8   9  -6    6.67    0.58   0
   8  10  -6    6.97    0.59   0
   8  11  -6    1.22    0.69   0
   8  12  -6    4.80    0.76   0
   8  13  -6    9.58    0.78   0
   8  17  -5    4.40    0.78   0
   8  20  -4   10.21    0.89   0
   8  22  -3    0.48    0.96   0
   9 -16   7    0.09    0.34   0
   9  -6  -2    9.33    0.33   0
   9  -4  -3    6.81    0.37   0
   9   7  -6    4.67    0.71   0
   9   8  -6   66.40    0.85   0
   9   9  -6    1.27    0.60   0
   9  10  -6    6.07    0.61   0
   9  11  -6   10.60    0.77   0
   9  12  -6   55.55    0.92   0
   9  13  -6    4.31    0.79   0
   9  17  -5    7.66    0.82   0
   9  20  -4    0.71    0.94   0
  10 -18  10    3.72    0.50   0
  10 -15   6   -0.18    0.29   0
  10   2  -5    4.31    0.56   0
  10   8  -6    2.67    0.74   0
  10   9  -6    1.07    0.79   0
  10  10  -6   15.72    0.84   0
  10  11  -6    0.35    0.83   0
  10  16  -5    7.45    0.84   0
  11  -3  -3    5.13    0.51   0
  11   3  -5    5.87    0.68   0
  11  15  -5    0.05    0.90   0
  12   5  -5    6.95    0.82   0
  12   6  -5   17.89    0.76   0
  12  13  -5    1.30    0.91   0
  13  -1  -3    2.42    0.64   0
  13   2  -4    1.27    0.78   0
  14  -2  -2    0.29    0.76   0
  14   1  -3    0.98    0.85   0
  14   5  -4    1.52    1.00   0
  14   6  -4    5.31    1.04   0
  14   7  -4    0.14    0.87   0
  -7  -2  24    1.36    0.92   0
  -7  -1  21    4.43    0.80   0
  -7  -1  22    5.31    0.85   0
  -7  -1  23    1.13    0.86   0
  -7  -1  24    0.55    0.91   0
  -7   0  20    6.40    0.72   0
  -7   1  18    4.04    0.64   0
  -7   1  19    6.38    0.64   0
  -7   2  18    3.08    0.59   0
  -7   3  17    1.95    0.55   0
  -7   5  16    1.35    0.55   0
  -7   6  16    6.44    0.52   0
  -7  12  17    3.50    0.51   0
  -7  13  18    0.39    0.54   0
  -6  -6  21   -0.37    0.71   0
  -6  -6  22   10.42    0.88   0
  -6  -6  23   -1.01    0.95   0
  -6  -6  24    3.14    0.99   0
  -6  -6  25    2.20    1.08   0
  -6  -5  19    1.67    0.62   0
  -6  -5  20    0.59    0.77   0
  -6  -4  18   44.45    0.82   0
  -6  -3  16    2.90    0.60   0
  -6  -2  15    1.60    0.56   0
  -6  -1  14    5.43    0.53   0
  -6   1  13   24.44    0.54   0
  -6   2  12   83.93    0.53   0
  -6   5  11   10.38    0.36   0
  -6   6  11    5.84    0.35   0
  -6  10  11    5.73    0.32   0
  -6  15  13   10.44    0.32   0
  -5  -9  21   -0.15    0.86   0
  -5  -9  22    0.53    0.97   0
  -5  -8  18    8.76    0.63   0
  -5  -8  19    3.27    0.76   0
  -5  -7  17   12.72    0.69   0
  -5  -6  15   13.06    0.63   0
  -5  -5  14   11.53    0.57   0
  -5  -4  13   15.59    0.54   0
  -5  -3  12    1.16    0.45   0
  -5  -2  11   31.62    0.47   0
  -5   4   8   12.26    0.29   0
  -4 -12  22   22.18    0.85   0
  -4 -12  23    3.51    0.85   0
  -4 -12  24    0.06    1.07   0
  -4 -11  19    1.02    0.67   0
  -4 -11  20    2.28    0.88   0
  -4 -10  17    0.72    0.72   0
  -4  -9  15   15.51    0.56   0
  -4  -8  14   40.07    0.65   0
  -4  -2   8  208.09    0.59   0
  -4   0   7   23.53    0.34   0
  -4   7   5    6.30    0.15   0
  -4  20   8    2.48    0.29   0
  -3 -14  22    5.31    0.82   0
  -3 -14  23    3.76    0.89   0
  -3 -14  24    1.49    1.10   0
  -3 -13  19   10.34    0.74   0
  -3 -12  17   16.87    0.79   0
  -3 -11  15   23.62    0.72   0
  -3 -10  13   29.63    0.53   0
  -3  -9  12    3.67    0.55   0
  -3  -4   7  219.49    0.60   0
  -3  14   3   24.24    0.24   0
  -3  17   4   10.49    0.29   0
  -3  19   5   10.10    0.34   0
  -3  22   7    2.44    0.40   0
  -3  23   8   -0.24    0.43   0
  -3  24   9    0.15    0.49   0
  -2 -15  20    4.05    0.90   0
  -2 -14  17   10.23    0.76   0
  -2 -13  15    2.51    0.69   0
  -2 -12  13   37.61    0.58   0
  -2  -4   5   12.48    0.30   0
  -2  13   1    1.10    0.25   0
  -2  17   2    5.46    0.38   0
  -2  19   3   11.21    0.39   0
  -2  21   4    1.43    0.46   0
  -1 -17  21    0.43    0.84   0
  -1 -17  22   -0.75    1.03   0
  -1 -17  23    0.68    1.14   0
  -1 -16  18   10.86    0.73   0
  -1 -15  16    2.88    0.75   0
  -1 -14  14   36.91    0.73   0
  -1 -13  12    3.60    0.46   0
  -1  -5   4   11.24    0.29   0
  -1   4   0    4.08    0.11   0
  -1  15   0   10.33    0.34   0
  -1  18   1   18.39    0.41   0
  -1  22   3    5.33    0.55   0
   0 -18  21   -1.39    0.98   0
   0 -18  22    9.23    1.06   0
   0 -17  17    1.47    0.64   0
   0 -15  13    0.33    0.51   0
   0 -13  10    7.53    0.49   0
   0  -7   4   10.10    0.28   0
   0  16  -1    1.23    0.39   0
   0  21   1    3.11    0.51   0
   0  23   2    2.37    0.66   0
   0  24   3    0.18    0.61   0
   1 -19  20    1.10    0.81   0
   1 -18  17    1.83    0.68   0
   1 -17  15    1.42    0.70   0
   1 -16  13   12.08    0.66   0
   1 -15  11    2.57    0.43   0
   1   3  -2   29.97    0.22   0
   1  17  -2    6.23    0.49   0
   1  23   1    5.16    0.63   0
   1  26   3    3.50    0.86   0
   2 -18  15    0.16    0.70   0
   2 -17  13    0.67    0.61   0
   2 -16  11    1.31    0.51   0
   2  -6   1  176.03    0.25   0
   2  16  -3   11.18    0.45   0
   2  22  -1    2.91    0.64   0
   2  25   1   -0.08    0.77   0
   2  26   2    1.07    0.85   0
   3 -13   6   10.98    0.33   0
   3 -12   5  111.62    0.44   0
   3 -11   4   26.97    0.30   0
   3  16  -4    7.73    0.55   0
   3  19  -3    0.60    0.66   0
   3  21  -2   -0.24    0.56   0
   3  23  -1    0.55    0.74   0
   3  25   0    0.14    0.87   0
   3  26   1    1.47    0.87   0
   4 -19  14    0.17    0.66   0
   4 -16   9    7.41    0.50   0
   4   7  -5   10.01    0.43   0
   4   8  -5    9.50    0.38   0
   4  11  -5    1.81    0.41   0
   4  12  -5   27.44    0.49   0
   4  13  -5   14.66    0.57   0
   4  18  -4   56.77    0.84   0
   4  21  -3   -0.12    0.73   0
   4  23  -2    2.16    0.84   0
   4  26   0    6.89    1.04   0
   5 -18  11    1.02    0.49   0
   5   0  -4  171.06    0.46   0
   5   4  -5   15.84    0.34   0
   5  16  -5    9.94    0.70   0
   5  19  -4    0.71    0.64   0
   5  24  -2    0.69    0.93   0
   5  25  -1    0.44    0.85   0
   6 -17   9    1.30    0.46   0
   6  -1  -4   11.87    0.32   0
   6   2  -5    3.43    0.38   0
   6   8  -6   88.99    0.66   0
   6   9  -6   11.31    0.57   0
   6  10  -6    4.56    0.56   0
   6  11  -6    2.59    0.60   0
   6  12  -6   10.97    0.63   0
   6  17  -5   22.58    0.69   0
   6  18  -5    0.22    0.75   0
   6  20  -4    5.43    0.75   0
   7 -20  14    4.86    0.74   0
   7 -19  12    2.77    0.59   0
   7 -18  10   28.33    0.54   0
   7 -15   6    9.42    0.35   0
   7 -11   2    1.38    0.15   0
   7  -4  -3    7.74    0.28   0
   7   1  -5   22.63    0.44   0
   7   6  -6    4.35    0.52   0
   7   7  -6    3.86    0.46   0
   7  12  -6    4.21    0.59   0
   7  13  -6    5.22    0.59   0
   7  14  -6    9.12    0.76   0
   7  18  -5    2.67    0.70   0
   7  23  -3    3.83    0.94   0
   8 -18  10    0.82    0.53   0
   8  -2  -4   21.18    0.41   0
   8   1  -5    2.56    0.42   0
   8   5  -6   19.99    0.59   0
   8   6  -6   81.82    0.63   0
   8  14  -6   19.00    0.71   0
   8  15  -6    0.56    0.82   0
   8  19  -5    1.08    0.96   0
   8  21  -4    0.21    0.91   0
   8  23  -3    4.64    1.03   0
   9 -18  10    0.11    0.53   0
   9  -2  -4  119.31    0.61   0
   9   1  -5   27.92    0.55   0
   9   5  -6   26.74    0.66   0
   9   6  -6    0.68    0.54   0
   9  14  -6    1.26    0.72   0
   9  15  -6    0.07    0.89   0
   9  21  -4    0.41    1.01   0
  10  -6  -2   50.08    0.43   0
  10  -4  -3    0.84    0.39   0
  10  -2  -4    2.42    0.48   0
  10   1  -5    9.53    0.55   0
  10   5  -6   13.09    0.69   0
  10   6  -6   71.73    0.88   0
  10   7  -6   14.91    0.66   0
  10  12  -6    7.13    0.76   0
  10  13  -6    3.57    0.76   0
  10  14  -6   10.57    0.95   0
  10  18  -5    1.14    0.90   0
  11  -1  -4    0.89    0.52   0
  11   2  -5    5.69    0.66   0
  11   7  -6    5.89    0.81   0
  11   8  -6    7.35    0.83   0
  11   9  -6    1.36    0.83   0
  11  10  -6    0.68    0.86   0
  11  11  -6    5.86    0.91   0
  11  12  -6    1.42    0.96   0
  11  13  -6    7.50    1.02   0
  11  17  -5    2.57    0.99   0
  12 -15   7    0.17    0.32   0
  12  -5  -2    4.82    0.52   0
  12  -3  -3    0.42    0.54   0
  12   0  -4    1.04    0.63   0
  12   3  -5    4.26    0.73   0
  12   4  -5   12.88    0.79   0
  13  -9   1    3.39    0.43   0
  13  -6  -1    0.15    0.53   0
  13  -4  -2    9.50    0.61   0
  13  -2  -3    4.00    0.68   0
  13   1  -4   10.16    0.84   0
  13   5  -5    0.54    0.88   0
  13   6  -5    0.82    0.95   0
  13  12  -5    2.15    0.99   0
  14  -8   1    0.46    0.54   0
  14   0  -3    0.95    0.78   0
  14   4  -4    2.34    0.98   0
  -7   0  21    0.73    0.73   0
  -7   0  22    0.00    0.83   0
  -7   0  23    2.01    0.86   0
  -7   0  24    1.88    0.96   0
  -7   1  20   20.68    0.76   0
  -7   1  21    3.74    0.71   0
  -7   2  19    1.49    0.65   0
  -7   4  17   10.27    0.55   0
  -7   5  17    9.15    0.58   0
  -7   7  16    2.62    0.44   0
  -7   8  16   12.22    0.49   0
  -7   9  16    0.86    0.46   0
  -7  10  17    0.90    0.53   0
  -7  11  17    1.58    0.52   0
  -7  12  18    2.98    0.57   0
  -7  13  19    0.11    0.58   0
  -6  -5  21    1.35    0.68   0
  -6  -5  22    4.98    0.88   0
  -6  -5  23    0.64    0.95   0
  -6  -5  24    1.42    1.00   0
  -6  -5  25    0.86    1.02   0
  -6  -4  19    9.43    0.76   0
  -6  -3  17   14.69    0.65   0
  -6  -2  16    8.72    0.62   0
  -6  -1  15   27.57    0.59   0
  -6   0  14   52.55    0.61   0
  -6   3  12   22.69    0.42   0
  -6   4  12   43.47    0.47   0
  -6   7  11    4.82    0.33   0
  -6   8  11   60.26    0.42   0
  -6   9  11    9.00    0.32   0
  -6  13  12    1.29    0.30   0
  -6  16  14   10.78    0.34   0
  -6  17  15    3.54    0.36   0
  -5  -9  23    0.80    0.83   0
  -5  -9  24    1.54    0.89   0
  -5  -9  25    9.03    0.98   0
  -5  -8  20   13.85    0.74   0
  -5  -8  21    2.79    0.88   0
  -5  -7  18    0.93    0.73   0
  -5  -6  16   25.93    0.70   0
  -5   0  10   44.26    0.43   0
  -5   2   9   15.77    0.34   0
  -5   5   8    3.94    0.26   0
  -5  12   8   32.52    0.20   0
  -4 -11  21    2.16    0.73   0
  -4 -11  22    5.01    0.94   0
  -4 -11  23    4.28    0.97   0
  -4 -10  18   26.38    0.71   0
  -4 -10  19    4.40    0.77   0
  -4  -9  16    1.04    0.55   0
  -4  -7  13   54.34    0.55   0
  -4  -6  12  110.30    0.68   0
  -4  -5  11    4.18    0.46   0
  -4  -4  10  196.05    0.67   0
  -4  -3   9   51.73    0.40   0
  -4   8   5   22.98    0.14   0
  -4  14   5   14.51    0.16   0
  -3 -13  20    4.48    0.74   0
  -3 -13  21    3.26    0.90   0
  -3 -13  22    1.41    0.96   0
  -3 -12  18    8.49    0.80   0
  -3 -11  16   -0.24    0.70   0
  -3 -10  14    5.27    0.62   0
  -3  -8  11    1.82    0.42   0
  -3  -7  10   43.52    0.52   0
  -3  -6   9  134.29    0.60   0
  -3  -5   8   35.16    0.39   0
  -3  -2   6  180.60    0.49   0
  -3   2   4  426.49    0.44   0
  -3  21   6    2.29    0.40   0
  -2 -15  21    7.04    0.81   0
  -2 -15  22    2.07    0.86   0
  -2 -15  23    0.66    1.10   0
  -2 -15  24   -0.89    1.11   0
  -2 -14  18    6.41    0.66   0
  -2 -14  19    6.25    0.82   0
  -2 -13  16    9.46    0.75   0
  -2 -11  12    0.88    0.45   0
  -2 -10  11    0.50    0.51   0
  -2  -5   6    1.25    0.34   0
  -2  -2   4   12.01    0.26   0
  -2   0   3   19.89    0.21   0
  -2  24   6   13.46    0.57   0
  -2  25   7    0.51    0.56   0
  -1 -16  20    1.70    0.90   0
  -1 -16  21    5.01    0.96   0
  -1 -13  13    0.74    0.58   0
  -1 -12  11    8.30    0.45   0
  -1 -11  10    6.14    0.49   0
  -1  16   0   14.96    0.40   0
  -1  19   1   24.47    0.50   0
  -1  21   2    5.52    0.53   0
  -1  24   4   12.51    0.65   0
  -1  25   5    1.40    0.66   0
  -1  26   6    0.38    0.68   0
   0 -15  14    2.21    0.65   0
   0 -14  12    0.98    0.55   0
   0 -12   9    3.71    0.38   0
   0 -11   8    1.86    0.41   0
   0  -8   5    5.13    0.33   0
   0   3  -1   28.67    0.14   0
   0   9  -2    4.91    0.27   0
   0  10  -2  122.19    0.43   0
   0  11  -2   31.26    0.36   0
   0  12  -2   23.08    0.36   0
   0  17  -1    8.22    0.43   0
   0  20   0   95.50    0.75   0
   0  22   1    2.29    0.61   0
   0  26   4    0.41    0.78   0
   1 -18  18   12.37    0.73   0
   1 -17  16    1.70    0.74   0
   1 -15  12   15.11    0.57   0
   1   8  -3   63.48    0.39   0
   1   9  -3   77.90    0.38   0
   1  10  -3   14.54    0.32   0
   1  11  -3    9.17    0.31   0
   1  12  -3   17.80    0.41   0
   1  13  -3    4.92    0.39   0
   1  20  -1    2.72    0.54   0
   1  22   0    7.45    0.63   0
   1  24   1    1.20    0.76   0
   1  25   2   -0.07    0.71   0
   2 -19  19    0.57    0.93   0
   2 -18  16   13.45    0.78   0
   2 -16  12    4.82    0.55   0
   2 -15  10   13.77    0.50   0
   2   3  -3    5.86    0.23   0
   2   9  -4   45.49    0.45   0
   2  10  -4   13.69    0.42   0
   2  11  -4    3.78    0.41   0
   2  12  -4   10.49    0.44   0
   2  17  -3   17.98    0.49   0
   2  20  -2    7.04    0.61   0
   2  24   0    3.38    0.74   0
   3 -20  20    2.95    1.05   0
   3 -18  14    8.26    0.71   0
   3 -17  12    3.31    0.58   0
   3   4  -4  109.62    0.40   0
   3  17  -4   22.46    0.64   0
   3  20  -3    6.76    0.71   0
   3  22  -2   20.00    0.82   0
   3  24  -1    1.98    0.82   0
   4 -19  15    5.69    0.71   0
   4   6  -5   34.27    0.39   0
   4  14  -5    5.02    0.47   0
   4  15  -5   18.82    0.62   0
   4  19  -4    5.35    0.73   0
   4  25  -1    0.93    0.92   0
   5 -20  16    3.69    0.77   0
   5 -17  10    0.68    0.52   0
   5 -15   7    0.84    0.36   0
   5   3  -5   65.31    0.46   0
   5  10  -6  173.15    0.78   0
   5  11  -6   24.42    0.60   0
   5  17  -5   22.46    0.62   0
   5  18  -5    5.20    0.73   0
   5  20  -4   32.84    0.78   0
   6 -19  13    0.87    0.65   0
   6 -18  11    1.07    0.56   0
   6   6  -6  150.11    0.68   0
   6   7  -6    3.44    0.41   0
   6  13  -6   10.42    0.58   0
   6  14  -6   28.84    0.64   0
   6  15  -6    4.78    0.73   0
   6  19  -5    6.77    0.87   0
   6  21  -4    1.12    0.78   0
   6  25  -2    0.49    0.92   0
   7 -17   9    1.00    0.47   0
   7 -14   5    7.10    0.29   0
   7  -6  -2   21.07    0.21   0
   7  -2  -4   75.60    0.42   0
   7   5  -6    8.41    0.41   0
   7  15  -6   11.80    0.68   0
   7  16  -6    5.66    0.80   0
   7  19  -5    1.86    0.75   0
   8 -19  12    0.25    0.58   0
   8 -15   6    0.64    0.31   0
   8   0  -5    3.45    0.44   0
   8   4  -6    1.44    0.52   0
   8  16  -6    5.25    0.73   0
   8  17  -6    0.80    0.90   0
   8  22  -4    1.56    0.97   0
   9 -19  12    0.53    0.62   0
   9 -15   6    1.03    0.32   0
   9  -8  -1   46.49    0.29   0
   9   0  -5   14.73    0.51   0
   9   4  -6  109.63    0.78   0
   9  16  -6    3.84    0.77   0
   9  17  -6    4.52    0.98   0
  10 -14   5    3.54    0.26   0
  10   4  -6    1.88    0.64   0
  11  -9   0    7.91    0.31   0
  11  -6  -2    6.10    0.42   0
  11  -4  -3   10.54    0.47   0
  11  -2  -4   13.62    0.57   0
  11   1  -5    9.78    0.60   0
  11   5  -6    3.20    0.75   0
  11   6  -6   29.81    0.83   0
  11  14  -6    4.47    0.86   0
  12 -11   2    1.07    0.24   0
  12  -7  -1    8.45    0.45   0
  12  -1  -4    3.80    0.64   0
  12   2  -5    7.24    0.71   0
  12   7  -6    2.70    0.90   0
  12   8  -6   11.58    0.97   0
  12   9  -6    3.94    0.91   0
  12  13  -6    0.08    1.09   0
  13   0  -4   25.80    0.82   0
  13   4  -5    4.52    0.87   0
  14  -5  -1    1.04    0.62   0
  14  -3  -2    3.96    0.71   0
  14  -1  -3    1.28    0.84   0
  14   2  -4   22.76    0.95   0
  14   7  -5    0.82    1.07   0
  -7   1  22    7.45    0.78   0
  -7   1  23   -0.23    0.84   0
  -7   1  24    0.14    0.93   0
  -7   2  20   15.03    0.72   0
  -7   2  21    1.22    0.72   0
  -7   2  22    3.35    0.83   0
  -7   2  23    3.84    0.94   0
  -7   3  19    0.95    0.62   0
  -7   3  20    9.92    0.74   0
  -7   4  19    4.43    0.67   0
  -7   5  18   -0.28    0.61   0
  -7   8  17   -0.27    0.51   0
  -7   9  17    1.31    0.51   0
  -7  11  18    1.37    0.55   0
  -7  12  19    0.26    0.57   0
  -6  -4  20    2.18    0.62   0
  -6  -4  21    4.92    0.80   0
  -6  -4  22    1.95    0.86   0
  -6  -4  23    0.21    0.87   0
  -6  -3  18   10.35    0.58   0
  -6  -3  19    6.73    0.73   0
  -6  -2  17    4.55    0.64   0
  -6  -1  16    1.83    0.60   0
  -6   0  15    3.71    0.53   0
  -6   1  14   11.17    0.51   0
  -6   2  13    4.58    0.43   0
  -6   5  12   22.51    0.43   0
  -5  -8  22    1.86    0.75   0
  -5  -8  23    2.99    0.95   0
  -5  -8  24    5.76    1.09   0
  -5  -8  25    7.63    1.14   0
  -5  -7  19    0.85    0.62   0
  -5  -7  20    1.03    0.78   0
  -5  -6  17   17.08    0.68   0
  -5  -5  15   11.79    0.52   0
  -5  -4  14   12.26    0.55   0
  -5  -3  13   48.19    0.58   0
  -5  -1  11    5.96    0.40   0
  -5   1  10   72.86    0.50   0
  -5   3   9   66.56    0.41   0
  -5   6   8   24.77    0.29   0
  -4 -11  24   -0.60    0.90   0
  -4 -11  25   13.18    0.99   0
  -4 -10  20   34.83    0.90   0
  -4 -10  21    7.68    0.86   0
  -4  -9  17   24.53    0.65   0
  -4  -8  15    3.65    0.54   0
  -4  -7  14   15.96    0.61   0
  -4  -1   8    5.46    0.35   0
  -4   3   6   23.81    0.26   0
  -4  17   6    2.16    0.22   0
  -4  19   7    3.99    0.27   0
  -3 -13  23    3.79    0.86   0
  -3 -13  24    3.22    0.92   0
  -3 -13  25    4.39    1.00   0
  -3 -12  19    7.41    0.69   0
  -3 -12  20   32.17    0.96   0
  -3 -11  17    3.49    0.74   0
  -3 -10  15    1.06    0.63   0
  -3  -9  13    5.28    0.55   0
  -3   0   5  121.46    0.35   0
  -3  15   3   12.18    0.26   0
  -3  18   4   13.25    0.35   0
  -3  20   5    8.10    0.39   0
  -2 -14  20    5.58    0.86   0
  -2 -14  21   11.97    0.91   0
  -2 -13  17    0.50    0.75   0
  -2 -12  15   40.91    0.74   0
  -2 -11  13    9.24    0.59   0
  -2  -9  10    6.75    0.39   0
  -2  -8   9    4.57    0.43   0
  -2  -7   8   18.11    0.44   0
  -2  -6   7  236.68    0.63   0
  -2   6   1   78.48    0.13   0
  -2  14   1   17.69    0.28   0
  -2  18   2   50.00    0.46   0
  -2  20   3    6.04    0.40   0
  -2  23   5    1.18    0.49   0
  -1 -16  22   -0.39    1.01   0
  -1 -16  23    5.14    1.13   0
  -1 -12  12   39.16    0.61   0
  -1 -10   9    8.74    0.43   0
  -1  -9   8    0.74    0.41   0
  -1  -7   6   31.69    0.40   0
  -1  -6   5  188.32    0.47   0
  -1  -3   3    2.14    0.25   0
  -1   1   1    7.89    0.06   0
  -1  17   0    6.48    0.41   0
  -1  23   3   17.89    0.63   0
   0 -17  20   -0.10    0.79   0
   0 -17  21    0.79    0.98   0
   0 -14  13   10.51    0.59   0
   0 -13  11   25.44    0.57   0
   0 -10   7   11.46    0.33   0
   0  -9   6   83.41    0.41   0
   0   8  -2  138.24    0.39   0
   0  13  -2   27.89    0.38   0
   0  14  -2  183.58    0.62   0
   0  18  -1    0.88    0.44   0
   0  24   2    3.18    0.66   0
   0  25   3    0.05    0.64   0
   1 -17  17   -1.02    0.77   0
   1 -16  14    8.06    0.54   0
   1 -13   9   32.61    0.43   0
   1 -12   8    0.03    0.37   0
   1   7  -3    3.92    0.24   0
   1  14  -3    0.75    0.40   0
   1  15  -3    1.48    0.42   0
   1  18  -2   29.81    0.55   0
   1  21  -1    0.21    0.59   0
   1  23   0    5.91    0.65   0
   1  26   2   -0.10    0.83   0
   2 -18  17    1.04    0.82   0
   2 -17  14    2.54    0.62   0
   2 -14   9   30.94    0.50   0
   2   7  -4   41.87    0.40   0
   2   8  -4  138.06    0.48   0
   2  13  -4   16.38    0.38   0
   2  18  -3   13.82    0.50   0
   2  21  -2    3.57    0.65   0
   2  23  -1    2.63    0.72   0
   2  25   0    0.46    0.84   0
   2  26   1    1.08    0.84   0
   3 -19  17    3.16    0.79   0
   3 -18  15    2.16    0.68   0
   3 -16  11    1.91    0.56   0
   3   0  -3   11.96    0.21   0
   3   3  -4   29.38    0.32   0
   3   9  -5   15.35    0.45   0
   3  10  -5    6.90    0.45   0
   3  11  -5   53.89    0.53   0
   3  12  -5  118.69    0.65   0
   3  13  -5    2.27    0.50   0
   3  18  -4    0.91    0.64   0
   3  21  -3    2.75    0.69   0
   3  23  -2    0.33    0.77   0
   3  25  -1    1.47    0.93   0
   3  26   0   -0.39    0.92   0
   4 -20  19    0.83    0.95   0
   4 -19  16    0.87    0.80   0
   4 -18  13    1.10    0.61   0
   4 -15   8   21.83    0.41   0
   4   1  -4   21.00    0.29   0
[truncated: 3,206,524 more chars]
