# Supplementary material
Source: MDPI journal article supplement (https://www.mdpi.com/2304-6740/7/10/117)
Supplement: s1 [file s1 › inorganics-584457-Supplementary Materials/CIF and CIFcheck files/K(18c6)Fe3.cif]

####################################################################### 
# 
# This file contains crystal structure data downloaded from the 
# Cambridge Structural Database (CSD) hosted by the Cambridge 
# Crystallographic Data Centre (CCDC).
# 
# Full information about CCDC data access policies and citation 
# guidelines are available at http://www.ccdc.cam.ac.uk/access/V1 
# 
# Audit and citation data items may have been added by the CCDC. 
# Please retain this information to preserve the provenance of 
# this file and to allow appropriate attribution of the data. 
# 
#######################################################################

data_k(18c6)fe7
_database_code_depnum_ccdc_archive 'CCDC 1918204'
loop_
_audit_author_name
_audit_author_address
'Igor Mueller'
;Philipps University Marburg
Germany
;
_audit_update_record             
;
2019-05-23 deposited with the CCDC.	2019-08-14 downloaded from the CCDC.
;
_audit_creation_date             2019-05-23
_audit_creation_method           
;
Olex2 1.2-alpha
(compiled 2018.07.26 svn.r3523 for OlexSys, GUI svn.r5532)
;
_shelx_SHELXL_version_number     2014/7
_audit_contact_author_address    Philipps-University
_audit_contact_author_email      gunnar.werncke@chemie.uni-marburg.de
_audit_contact_author_name       C.
_audit_contact_author_phone      +4964212825637
_publ_contact_author_id_orcid    299638391
_publ_section_references         
;
Dolomanov, O.V., Bourhis, L.J., Gildea, R.J, Howard, J.A.K. & Puschmann, H.
 (2009), J. Appl. Cryst. 42, 339-341.

Sheldrick, G.M. (2008). Acta Cryst. A64, 112-122.
;
_chemical_name_common            ?
_chemical_name_systematic        ?
_chemical_formula_moiety         'C22 H44 Fe N4 Si4, 2(C10 H20 K0.5 O4)'
_chemical_formula_sum            'C42 H84 Fe K N4 O8 Si4'
_chemical_formula_weight         980.44
_chemical_melting_point          ?
loop_
_atom_type_symbol
_atom_type_description
_atom_type_scat_dispersion_real
_atom_type_scat_dispersion_imag
_atom_type_scat_source
C C 0.0033 0.0016 'International Tables Vol C Tables 4.2.6.8 and 6.1.1.4'
H H 0.0000 0.0000 'International Tables Vol C Tables 4.2.6.8 and 6.1.1.4'
Fe Fe 0.3463 0.8444 'International Tables Vol C Tables 4.2.6.8 and 6.1.1.4'
K K 0.2009 0.2494 'International Tables Vol C Tables 4.2.6.8 and 6.1.1.4'
N N 0.0061 0.0033 'International Tables Vol C Tables 4.2.6.8 and 6.1.1.4'
O O 0.0106 0.0060 'International Tables Vol C Tables 4.2.6.8 and 6.1.1.4'
Si Si 0.0817 0.0704 'International Tables Vol C Tables 4.2.6.8 and 6.1.1.4'

_shelx_space_group_comment       
;
The symmetry employed for this shelxl refinement is uniquely defined
by the following loop, which should always be used as a source of
symmetry information in preference to the above space-group names.
They are only intended as comments.
;
_space_group_crystal_system      triclinic
_space_group_IT_number           2
_space_group_name_H-M_alt        'P -1'
_space_group_name_Hall           '-P 1'
loop_
_space_group_symop_operation_xyz
'x, y, z'
'-x, -y, -z'

_cell_length_a                   10.8613(5)
_cell_length_b                   13.2627(6)
_cell_length_c                   19.8669(9)
_cell_angle_alpha                77.5970(10)
_cell_angle_beta                 80.062(2)
_cell_angle_gamma                83.452(2)
_cell_volume                     2744.3(2)
_cell_formula_units_Z            2
_cell_measurement_reflns_used    9922
_cell_measurement_temperature    100.0
_cell_measurement_theta_max      27.4988
_cell_measurement_theta_min      2.3440
_shelx_estimated_absorpt_T_max   0.949
_shelx_estimated_absorpt_T_min   0.905
_exptl_absorpt_coefficient_mu    0.485
_exptl_absorpt_correction_T_max  0.95
_exptl_absorpt_correction_T_min  0.90
_exptl_absorpt_correction_type   multi-scan
_exptl_absorpt_process_details   
'ADABS-2016/2 (Bruker,2016/2) was used for absorption correction. wR2(int) was 0.1663 before and 0.0332 after correction. The Ratio of minimum to maximum transmission is 0.950. The \l/2 correction factor is Not present.'
_exptl_absorpt_special_details   ?
_exptl_crystal_colour            'clear dark green'
_exptl_crystal_colour_lustre     clear
_exptl_crystal_colour_modifier   dark
_exptl_crystal_colour_primary    green
_exptl_crystal_density_diffrn    1.187
_exptl_crystal_density_meas      ?
_exptl_crystal_density_method    ?
_exptl_crystal_description       prism
_exptl_crystal_F_000             1058
_exptl_crystal_size_max          0.21
_exptl_crystal_size_mid          0.2
_exptl_crystal_size_min          0.11
_exptl_transmission_factor_max   ?
_exptl_transmission_factor_min   ?
_diffrn_reflns_av_R_equivalents  0.0332
_diffrn_reflns_av_unetI/netI     0.0201
_diffrn_reflns_Laue_measured_fraction_full 0.999
_diffrn_reflns_Laue_measured_fraction_max 0.998
_diffrn_reflns_limit_h_max       14
_diffrn_reflns_limit_h_min       -14
_diffrn_reflns_limit_k_max       17
_diffrn_reflns_limit_k_min       -17
_diffrn_reflns_limit_l_max       25
_diffrn_reflns_limit_l_min       -25
_diffrn_reflns_number            103782
_diffrn_reflns_point_group_measured_fraction_full 0.999
_diffrn_reflns_point_group_measured_fraction_max 0.998
_diffrn_reflns_theta_full        25.242
_diffrn_reflns_theta_max         27.562
_diffrn_reflns_theta_min         2.323
_diffrn_ambient_temperature      100.0
_diffrn_detector                 'Bruker APEX2 area detector'
_diffrn_detector_area_resol_mean 7.9
_diffrn_detector_type            'CCD area detector'
_diffrn_measured_fraction_theta_full 0.999
_diffrn_measured_fraction_theta_max 0.998
_diffrn_measurement_device       'three-circle diffractometer'
_diffrn_measurement_device_type  'Bruker Quest D8'
_diffrn_measurement_method       '\w and \f scans'
_diffrn_radiation_monochromator  'mirror optics'
_diffrn_radiation_probe          x-ray
_diffrn_radiation_type           MoK\a
_diffrn_radiation_wavelength     0.71073
_diffrn_source                   'microfocus sealed X-ray tube'
_diffrn_source_type              'Incoatec I\ms'
_reflns_Friedel_coverage         0.000
_reflns_Friedel_fraction_full    .
_reflns_Friedel_fraction_max     .
_reflns_number_gt                10773
_reflns_number_total             12642
_reflns_special_details          
;
 Reflections were merged by SHELXL according to the crystal
 class for the calculation of statistics and refinement.
 
 _reflns_Friedel_fraction is defined as the number of unique
 Friedel pairs measured divided by the number that would be
 possible theoretically, ignoring centric projections and
 systematic absences.
;
_reflns_threshold_expression     'I > 2\s(I)'
_computing_cell_refinement       ?
_computing_data_collection       ?
_computing_data_reduction        ?
_computing_molecular_graphics    'Olex2 (Dolomanov et al., 2009)'
_computing_publication_material  'Olex2 (Dolomanov et al., 2009)'
_computing_structure_refinement  'XL (Sheldrick, 2008)'
_computing_structure_solution    ?
_refine_diff_density_max         0.340
_refine_diff_density_min         -0.260
_refine_diff_density_rms         0.045
_refine_ls_extinction_coef       .
_refine_ls_extinction_method     none
_refine_ls_goodness_of_fit_ref   1.060
_refine_ls_hydrogen_treatment    constr
_refine_ls_matrix_type           full
_refine_ls_number_parameters     648
_refine_ls_number_reflns         12642
_refine_ls_number_restraints     560
_refine_ls_R_factor_all          0.0384
_refine_ls_R_factor_gt           0.0280
_refine_ls_restrained_S_all      1.048
_refine_ls_shift/su_max          0.001
_refine_ls_shift/su_mean         0.000
_refine_ls_structure_factor_coef Fsqd
_refine_ls_weighting_details     
'w=1/[\s^2^(Fo^2^)+(0.0266P)^2^+1.2231P] where P=(Fo^2^+2Fc^2^)/3'
_refine_ls_weighting_scheme      calc
_refine_ls_wR_factor_gt          0.0634
_refine_ls_wR_factor_ref         0.0675
_refine_special_details          ?
_olex2_refinement_description    
;
1. Fixed Uiso
 At 1.2 times of:
  All C(H) groups, All C(H,H) groups
 At 1.5 times of:
  All C(H,H,H) groups
2. Uiso/Uaniso restraints and constraints
O1S \\sim C2S \\sim C3S \\sim C4S \\sim C5S \\sim O1SA \\sim C2SA \\sim C3SA
\\sim C4SA \\sim C5SA: within 2A with sigma of 0.04 and sigma for terminal
atoms of 0.08
O1S' \\sim C2S' \\sim C3S' \\sim C4S' \\sim C5S' \\sim O1SB \\sim C2SB \\sim
C3SB \\sim C4SB \\sim C5SB: within 2A with sigma of 0.04 and sigma for terminal
atoms of 0.08
Uanis(O1S) \\sim Ueq, Uanis(C2S) \\sim Ueq, Uanis(C3S) \\sim Ueq, Uanis(C4S)
\\sim Ueq, Uanis(C5S) \\sim Ueq, Uanis(O1SA) \\sim Ueq, Uanis(C2SA) \\sim Ueq,
Uanis(C3SA) \\sim Ueq, Uanis(C4SA) \\sim Ueq, Uanis(C5SA) \\sim Ueq: with sigma
of 0.1 and sigma for terminal atoms of 0.2
Uanis(O1S') \\sim Ueq, Uanis(C2S') \\sim Ueq, Uanis(C3S') \\sim Ueq,
Uanis(C4S') \\sim Ueq, Uanis(C5S') \\sim Ueq, Uanis(O1SB) \\sim Ueq,
Uanis(C2SB) \\sim Ueq, Uanis(C3SB) \\sim Ueq, Uanis(C4SB) \\sim Ueq,
Uanis(C5SB) \\sim Ueq: with sigma of 0.1 and sigma for terminal atoms of 0.2
3. Rigid body (RIGU) restrains
 O1S, C2S, C3S, C4S, C5S, O1SA, C2SA, C3SA, C4SA, C5SA
 with sigma for 1-2 distances of 0.004 and sigma for 1-3 distances of 0.004
 O1S', C2S', C3S', C4S', C5S', O1SB, C2SB, C3SB, C4SB, C5SB
 with sigma for 1-2 distances of 0.004 and sigma for 1-3 distances of 0.004
4. Same fragment restrains
{O1SA, C2SA, C3SA, C4SA, C5SA} sigma for 1-2: 0.02, 1-3: 0.04
as
{O1S, C2S, C3S, C4S, C5S}
{O1SB, C2SB, C3SB, C4SB, C5SB} sigma for 1-2: 0.02, 1-3: 0.04
as
{O1S', C2S', C3S', C4S', C5S'}
5. Others
 Sof(O1SA)=Sof(C2SA)=Sof(H2SG)=Sof(H2SH)=Sof(C3SA)=Sof(H3SG)=Sof(H3SH)=
 Sof(C4SA)=Sof(H4SG)=Sof(H4SH)=Sof(C5SA)=Sof(H5SG)=Sof(H5SH)=1-FVAR(1)
 Sof(O1S)=Sof(C2S)=Sof(H2SE)=Sof(H2SF)=Sof(C3S)=Sof(H3SE)=Sof(H3SF)=Sof(C4S)=
 Sof(H4SE)=Sof(H4SF)=Sof(C5S)=Sof(H5SE)=Sof(H5SF)=FVAR(1)
 Sof(O1SB)=Sof(C2SB)=Sof(H2SC)=Sof(H2SD)=Sof(C3SB)=Sof(H3SC)=Sof(H3SD)=
 Sof(C4SB)=Sof(H4SC)=Sof(H4SD)=Sof(C5SB)=Sof(H5SC)=Sof(H5SD)=1-FVAR(2)
 Sof(O1S')=Sof(C2S')=Sof(H2SA)=Sof(H2SB)=Sof(C3S')=Sof(H3SA)=Sof(H3SB)=
 Sof(C4S')=Sof(H4SA)=Sof(H4SB)=Sof(C5S')=Sof(H5SA)=Sof(H5SB)=FVAR(2)
6.a Secondary CH2 refined with riding coordinates:
 C2C(H2CA,H2CB), C3C(H3CA,H3CB), C5C(H5CA,H5CB), C6C(H6CA,H6CB), C8C(H8CA,
 H8CB), C9C(H9CA,H9CB), C2K(H2KA,H2KB), C3K(H3KA,H3KB), C5K(H5KA,H5KB),
 C6K(H6KA,H6KB), C8K(H8KA,H8KB), C9K(H9KA,H9KB), C2S(H2SE,H2SF), C3S(H3SE,H3SF),
  C4S(H4SE,H4SF), C5S(H5SE,H5SF), C2SA(H2SG,H2SH), C3SA(H3SG,H3SH), C4SA(H4SG,
 H4SH), C5SA(H5SG,H5SH), C2S'(H2SA,H2SB), C3S'(H3SA,H3SB), C4S'(H4SA,H4SB),
 C5S'(H5SA,H5SB), C2SB(H2SC,H2SD), C3SB(H3SC,H3SD), C4SB(H4SC,H4SD), C5SB(H5SC,
 H5SD)
6.b Aromatic/amide H refined with riding coordinates:
 C1(H1), C2(H2), C3(H3), C4(H4), C7(H7), C8(H8), C9(H9), C10(H10)
6.c Idealised Me refined as rotating group:
 C11(H11A,H11B,H11C), C12(H12A,H12B,H12C), C13(H13A,H13B,H13C), C21(H21A,H21B,
 H21C), C22(H22A,H22B,H22C), C23(H23A,H23B,H23C), C31(H31A,H31B,H31C), C32(H32A,
 H32B,H32C), C33(H33A,H33B,H33C), C41(H41A,H41B,H41C), C42(H42A,H42B,H42C),
 C43(H43A,H43B,H43C)
;
_atom_sites_solution_hydrogens   geom
_atom_sites_solution_primary     ?
_atom_sites_solution_secondary   ?
loop_
_atom_site_label
_atom_site_type_symbol
_atom_site_fract_x
_atom_site_fract_y
_atom_site_fract_z
_atom_site_U_iso_or_equiv
_atom_site_adp_type
_atom_site_occupancy
_atom_site_site_symmetry_order
_atom_site_calc_flag
_atom_site_refinement_flags_posn
_atom_site_refinement_flags_adp
_atom_site_refinement_flags_occupancy
_atom_site_disorder_assembly
_atom_site_disorder_group
Fe1 Fe 0.50351(2) 0.44923(2) 0.23693(2) 0.01315(5) Uani 1 1 d . . . . .
N1 N 0.61064(10) 0.42728(8) 0.31697(5) 0.0158(2) Uani 1 1 d . . . . .
N2 N 0.68347(10) 0.47056(8) 0.18340(5) 0.0159(2) Uani 1 1 d . . . . .
N3 N 0.45961(10) 0.32859(8) 0.20145(5) 0.0152(2) Uani 1 1 d . . . . .
N4 N 0.38613(10) 0.57075(8) 0.25841(5) 0.0154(2) Uani 1 1 d . . . . .
C1 C 0.56430(12) 0.41581(10) 0.38596(7) 0.0192(3) Uani 1 1 d . . . . .
H1 H 0.4777 0.4055 0.3999 0.023 Uiso 1 1 calc R . . . .
C2 C 0.63384(13) 0.41814(11) 0.43683(7) 0.0232(3) Uani 1 1 d . . . . .
H2 H 0.5964 0.4095 0.4844 0.028 Uiso 1 1 calc R . . . .
C3 C 0.76282(13) 0.43377(11) 0.41675(7) 0.0244(3) Uani 1 1 d . . . . .
H3 H 0.8141 0.4349 0.4507 0.029 Uiso 1 1 calc R . . . .
C4 C 0.81240(12) 0.44716(10) 0.34764(7) 0.0205(3) Uani 1 1 d . . . . .
H4 H 0.8987 0.4583 0.3335 0.025 Uiso 1 1 calc R . . . .
C5 C 0.73624(11) 0.44454(10) 0.29692(7) 0.0162(2) Uani 1 1 d . . . . .
C6 C 0.77791(12) 0.46141(10) 0.22362(7) 0.0164(2) Uani 1 1 d . . . . .
C7 C 0.90462(12) 0.46546(11) 0.19183(7) 0.0225(3) Uani 1 1 d . . . . .
H7 H 0.9687 0.4597 0.2198 0.027 Uiso 1 1 calc R . . . .
C8 C 0.93547(13) 0.47754(12) 0.12113(8) 0.0259(3) Uani 1 1 d . . . . .
H8 H 1.0205 0.4804 0.0996 0.031 Uiso 1 1 calc R . . . .
C9 C 0.83850(13) 0.48572(11) 0.08034(7) 0.0234(3) Uani 1 1 d . . . . .
H9 H 0.8572 0.4939 0.0311 0.028 Uiso 1 1 calc R . . . .
C10 C 0.71742(12) 0.48160(10) 0.11357(7) 0.0184(3) Uani 1 1 d . . . . .
H10 H 0.6530 0.4868 0.0859 0.022 Uiso 1 1 calc R . . . .
Si1 Si 0.53082(3) 0.21126(3) 0.23384(2) 0.01666(7) Uani 1 1 d . . . . .
C11 C 0.48447(13) 0.17228(11) 0.33094(7) 0.0223(3) Uani 1 1 d . . . . .
H11A H 0.5263 0.1043 0.3476 0.033 Uiso 1 1 calc GR . . . .
H11B H 0.3934 0.1687 0.3420 0.033 Uiso 1 1 calc GR . . . .
H11C H 0.5095 0.2236 0.3538 0.033 Uiso 1 1 calc GR . . . .
C12 C 0.70667(13) 0.20912(11) 0.21747(8) 0.0244(3) Uani 1 1 d . . . . .
H12A H 0.7427 0.1398 0.2364 0.037 Uiso 1 1 calc GR . . . .
H12B H 0.7333 0.2598 0.2403 0.037 Uiso 1 1 calc GR . . . .
H12C H 0.7357 0.2267 0.1672 0.037 Uiso 1 1 calc GR . . . .
C13 C 0.49561(14) 0.10075(11) 0.19552(8) 0.0262(3) Uani 1 1 d . . . . .
H13A H 0.5234 0.0347 0.2238 0.039 Uiso 1 1 calc GR . . . .
H13B H 0.5401 0.1070 0.1477 0.039 Uiso 1 1 calc GR . . . .
H13C H 0.4052 0.1033 0.1953 0.039 Uiso 1 1 calc GR . . . .
Si2 Si 0.38225(3) 0.35521(3) 0.13158(2) 0.01586(7) Uani 1 1 d . . . . .
C21 C 0.47840(13) 0.31780(11) 0.05087(7) 0.0232(3) Uani 1 1 d . . . . .
H21A H 0.4304 0.3384 0.0119 0.035 Uiso 1 1 calc GR . . . .
H21B H 0.4986 0.2427 0.0594 0.035 Uiso 1 1 calc GR . . . .
H21C H 0.5562 0.3529 0.0393 0.035 Uiso 1 1 calc GR . . . .
C22 C 0.23101(13) 0.29028(12) 0.14717(7) 0.0247(3) Uani 1 1 d . . . . .
H22A H 0.1819 0.3211 0.1098 0.037 Uiso 1 1 calc GR . . . .
H22B H 0.1827 0.3000 0.1921 0.037 Uiso 1 1 calc GR . . . .
H22C H 0.2500 0.2161 0.1478 0.037 Uiso 1 1 calc GR . . . .
C23 C 0.33566(14) 0.49707(11) 0.10583(7) 0.0250(3) Uani 1 1 d . . . . .
H23A H 0.2983 0.5100 0.0630 0.037 Uiso 1 1 calc GR . . . .
H23B H 0.4099 0.5361 0.0978 0.037 Uiso 1 1 calc GR . . . .
H23C H 0.2744 0.5193 0.1432 0.037 Uiso 1 1 calc GR . . . .
Si3 Si 0.45030(3) 0.68554(3) 0.24825(2) 0.01827(8) Uani 1 1 d . . . . .
C31 C 0.53899(15) 0.69215(12) 0.32061(9) 0.0331(4) Uani 1 1 d . . . . .
H31A H 0.5673 0.7617 0.3136 0.050 Uiso 1 1 calc GR . . . .
H31B H 0.6118 0.6412 0.3203 0.050 Uiso 1 1 calc GR . . . .
H31C H 0.4840 0.6769 0.3655 0.050 Uiso 1 1 calc GR . . . .
C32 C 0.56115(16) 0.71764(12) 0.16457(9) 0.0355(4) Uani 1 1 d . . . . .
H32A H 0.5820 0.7895 0.1573 0.053 Uiso 1 1 calc GR . . . .
H32B H 0.5214 0.7089 0.1257 0.053 Uiso 1 1 calc GR . . . .
H32C H 0.6379 0.6712 0.1670 0.053 Uiso 1 1 calc GR . . . .
C33 C 0.32999(13) 0.80035(10) 0.24555(7) 0.0235(3) Uani 1 1 d . . . . .
H33A H 0.3723 0.8639 0.2392 0.035 Uiso 1 1 calc GR . . . .
H33B H 0.2714 0.7920 0.2894 0.035 Uiso 1 1 calc GR . . . .
H33C H 0.2838 0.8048 0.2067 0.035 Uiso 1 1 calc GR . . . .
Si4 Si 0.24238(3) 0.54756(3) 0.30571(2) 0.01627(7) Uani 1 1 d . . . . .
C41 C 0.22337(14) 0.57811(12) 0.39558(7) 0.0259(3) Uani 1 1 d . . . . .
H41A H 0.1402 0.5610 0.4209 0.039 Uiso 1 1 calc GR . . . .
H41B H 0.2320 0.6520 0.3915 0.039 Uiso 1 1 calc GR . . . .
H41C H 0.2880 0.5372 0.4210 0.039 Uiso 1 1 calc GR . . . .
C42 C 0.21043(13) 0.40746(11) 0.32132(7) 0.0229(3) Uani 1 1 d . . . . .
H42A H 0.1296 0.3968 0.3515 0.034 Uiso 1 1 calc GR . . . .
H42B H 0.2771 0.3644 0.3439 0.034 Uiso 1 1 calc GR . . . .
H42C H 0.2079 0.3882 0.2767 0.034 Uiso 1 1 calc GR . . . .
C43 C 0.10846(13) 0.62365(11) 0.26338(8) 0.0261(3) Uani 1 1 d . . . . .
H43A H 0.0288 0.6063 0.2930 0.039 Uiso 1 1 calc GR . . . .
H43B H 0.1100 0.6062 0.2177 0.039 Uiso 1 1 calc GR . . . .
H43C H 0.1171 0.6979 0.2574 0.039 Uiso 1 1 calc GR . . . .
K1 K 0.0000 0.0000 0.5000 0.02016(9) Uani 1 2 d S T P . .
O1C O -0.18749(9) 0.88663(8) -0.02095(5) 0.0257(2) Uani 1 1 d . . . . .
C2C C -0.17585(14) 0.77974(11) 0.01090(8) 0.0278(3) Uani 1 1 d . . . . .
H2CA H -0.2330 0.7412 -0.0061 0.033 Uiso 1 1 calc R . . . .
H2CB H -0.1983 0.7711 0.0622 0.033 Uiso 1 1 calc R . . . .
C3C C -0.04252(14) 0.73904(11) -0.00765(8) 0.0283(3) Uani 1 1 d . . . . .
H3CA H -0.0336 0.6630 0.0088 0.034 Uiso 1 1 calc R . . . .
H3CB H -0.0172 0.7545 -0.0589 0.034 Uiso 1 1 calc R . . . .
O4C O 0.03474(9) 0.78763(7) 0.02479(5) 0.0241(2) Uani 1 1 d . . . . .
C5C C 0.16141(15) 0.74432(12) 0.01729(9) 0.0316(3) Uani 1 1 d . . . . .
H5CA H 0.1977 0.7539 -0.0327 0.038 Uiso 1 1 calc R . . . .
H5CB H 0.1650 0.6692 0.0375 0.038 Uiso 1 1 calc R . . . .
C6C C 0.23421(14) 0.79814(11) 0.05456(8) 0.0287(3) Uani 1 1 d . . . . .
H6CA H 0.1909 0.7973 0.1028 0.034 Uiso 1 1 calc R . . . .
H6CB H 0.3188 0.7621 0.0569 0.034 Uiso 1 1 calc R . . . .
O7C O 0.24435(9) 0.90253(8) 0.01747(5) 0.0253(2) Uani 1 1 d . . . . .
C8C C 0.31466(13) 0.95805(12) 0.04921(8) 0.0296(3) Uani 1 1 d . . . . .
H8CA H 0.4021 0.9269 0.0475 0.035 Uiso 1 1 calc R . . . .
H8CB H 0.2776 0.9550 0.0987 0.035 Uiso 1 1 calc R . . . .
C9C C 0.31273(13) 1.06833(13) 0.01058(9) 0.0309(3) Uani 1 1 d . . . . .
H9CA H 0.3689 1.1069 0.0283 0.037 Uiso 1 1 calc R . . . .
H9CB H 0.3422 1.0711 -0.0398 0.037 Uiso 1 1 calc R . . . .
K2 K 0.0000 1.0000 0.0000 0.02297(9) Uani 1 2 d S T P . .
O1K O -0.19711(9) 0.14604(8) 0.46008(5) 0.0235(2) Uani 1 1 d . . . . .
C2K C -0.19822(13) 0.17091(11) 0.38678(7) 0.0247(3) Uani 1 1 d . . . . .
H2KA H -0.2574 0.2322 0.3750 0.030 Uiso 1 1 calc R . . . .
H2KB H -0.2257 0.1121 0.3713 0.030 Uiso 1 1 calc R . . . .
C3K C -0.06806(13) 0.19327(11) 0.35095(8) 0.0240(3) Uani 1 1 d . . . . .
H3KA H -0.0684 0.2198 0.3004 0.029 Uiso 1 1 calc R . . . .
H3KB H -0.0369 0.2466 0.3704 0.029 Uiso 1 1 calc R . . . .
O4K O 0.01145(9) 0.09980(7) 0.36159(5) 0.0212(2) Uani 1 1 d . . . . .
C5K C 0.13540(13) 0.11436(11) 0.32633(8) 0.0272(3) Uani 1 1 d . . . . .
H5KA H 0.1713 0.1676 0.3436 0.033 Uiso 1 1 calc R . . . .
H5KB H 0.1344 0.1384 0.2757 0.033 Uiso 1 1 calc R . . . .
C6K C 0.21394(14) 0.01363(11) 0.33933(7) 0.0252(3) Uani 1 1 d . . . . .
H6KA H 0.1725 -0.0416 0.3275 0.030 Uiso 1 1 calc R . . . .
H6KB H 0.2969 0.0198 0.3096 0.030 Uiso 1 1 calc R . . . .
O7K O 0.22945(9) -0.01227(7) 0.41089(5) 0.0221(2) Uani 1 1 d . . . . .
C8K C 0.30860(14) -0.10524(11) 0.42574(8) 0.0279(3) Uani 1 1 d . . . . .
H8KA H 0.3928 -0.0967 0.3977 0.033 Uiso 1 1 calc R . . . .
H8KB H 0.2728 -0.1633 0.4138 0.033 Uiso 1 1 calc R . . . .
C9K C 0.31853(13) -0.12781(12) 0.50179(8) 0.0285(3) Uani 1 1 d . . . . .
H9KA H 0.3774 -0.1895 0.5130 0.034 Uiso 1 1 calc R . . . .
H9KB H 0.3504 -0.0683 0.5143 0.034 Uiso 1 1 calc R . . . .
O1S O -0.0724(9) 0.9849(11) 0.1390(5) 0.065(2) Uani 0.299(12) 1 d D U . A 1
C2S C -0.1683(12) 0.9194(14) 0.1682(5) 0.069(3) Uani 0.299(12) 1 d D U . A 1
H2SE H -0.1538 0.8553 0.1490 0.083 Uiso 0.299(12) 1 calc R . . A 1
H2SF H -0.2506 0.9544 0.1583 0.083 Uiso 0.299(12) 1 calc R . . A 1
C3S C -0.1645(13) 0.8941(11) 0.2474(6) 0.042(3) Uani 0.299(12) 1 d D U . A 1
H3SE H -0.2355 0.9311 0.2731 0.051 Uiso 0.299(12) 1 calc R . . A 1
H3SF H -0.1650 0.8188 0.2665 0.051 Uiso 0.299(12) 1 calc R . . A 1
C4S C -0.0388(17) 0.9346(18) 0.2500(9) 0.055(4) Uani 0.299(12) 1 d D U . A 1
H4SE H -0.0455 0.9666 0.2912 0.066 Uiso 0.299(12) 1 calc R . . A 1
H4SF H 0.0276 0.8768 0.2533 0.066 Uiso 0.299(12) 1 calc R . . A 1
C5S C -0.007(2) 1.0119(16) 0.1856(9) 0.051(3) Uani 0.299(12) 1 d D U . A 1
H5SE H -0.0355 1.0829 0.1930 0.061 Uiso 0.299(12) 1 calc R . . A 1
H5SF H 0.0839 1.0079 0.1688 0.061 Uiso 0.299(12) 1 calc R . . A 1
O1SA O -0.0322(5) 0.9489(3) 0.14285(16) 0.0467(10) Uani 0.701(12) 1 d D U . A 2
C2SA C -0.1247(5) 0.8749(4) 0.17233(18) 0.0459(11) Uani 0.701(12) 1 d D U . A 2
H2SG H -0.0865 0.8035 0.1722 0.055 Uiso 0.701(12) 1 calc R . . A 2
H2SH H -0.1947 0.8877 0.1448 0.055 Uiso 0.701(12) 1 calc R . . A 2
C3SA C -0.1716(7) 0.8882(6) 0.2451(3) 0.0580(18) Uani 0.701(12) 1 d D U . A 2
H3SG H -0.1962 0.8221 0.2758 0.070 Uiso 0.701(12) 1 calc R . . A 2
H3SH H -0.2439 0.9408 0.2469 0.070 Uiso 0.701(12) 1 calc R . . A 2
C4SA C -0.0576(7) 0.9247(7) 0.2655(3) 0.0384(11) Uani 0.701(12) 1 d D U . A 2
H4SG H -0.0824 0.9653 0.3028 0.046 Uiso 0.701(12) 1 calc R . . A 2
H4SH H 0.0021 0.8656 0.2811 0.046 Uiso 0.701(12) 1 calc R . . A 2
C5SA C -0.0034(7) 0.9906(6) 0.1985(3) 0.0369(12) Uani 0.701(12) 1 d D U . A 2
H5SG H -0.0402 1.0630 0.1955 0.044 Uiso 0.701(12) 1 calc R . . A 2
H5SH H 0.0885 0.9901 0.1958 0.044 Uiso 0.701(12) 1 calc R . . A 2
O1S' O 0.1133(11) 0.1633(10) 0.5141(8) 0.046(3) Uani 0.367(16) 1 d D U . B 1
C2S' C 0.2371(11) 0.1625(9) 0.5328(7) 0.036(2) Uani 0.367(16) 1 d D U . B 1
H2SA H 0.3031 0.1391 0.4971 0.043 Uiso 0.367(16) 1 calc R . . B 1
H2SB H 0.2438 0.1164 0.5785 0.043 Uiso 0.367(16) 1 calc R . . B 1
C3S' C 0.2489(13) 0.2747(12) 0.5359(13) 0.058(4) Uani 0.367(16) 1 d D U . B 1
H3SA H 0.3082 0.3074 0.4956 0.070 Uiso 0.367(16) 1 calc R . . B 1
H3SB H 0.2789 0.2788 0.5795 0.070 Uiso 0.367(16) 1 calc R . . B 1
C4S' C 0.1170(10) 0.3280(8) 0.5338(8) 0.058(3) Uani 0.367(16) 1 d D U . B 1
H4SA H 0.0878 0.3591 0.5754 0.069 Uiso 0.367(16) 1 calc R . . B 1
H4SB H 0.1149 0.3831 0.4914 0.069 Uiso 0.367(16) 1 calc R . . B 1
C5S' C 0.0427(11) 0.2487(11) 0.5329(10) 0.056(3) Uani 0.367(16) 1 d D U . B 1
H5SA H -0.0065 0.2279 0.5798 0.067 Uiso 0.367(16) 1 calc R . . B 1
H5SB H -0.0172 0.2751 0.4996 0.067 Uiso 0.367(16) 1 calc R . . B 1
O1SB O 0.1182(7) 0.1517(6) 0.5353(4) 0.0466(14) Uani 0.633(16) 1 d D U . B 2
C2SB C 0.2500(8) 0.1662(8) 0.5251(6) 0.072(3) Uani 0.633(16) 1 d D U . B 2
H2SC H 0.2923 0.1463 0.4810 0.086 Uiso 0.633(16) 1 calc R . . B 2
H2SD H 0.2895 0.1230 0.5641 0.086 Uiso 0.633(16) 1 calc R . . B 2
C3SB C 0.2606(7) 0.2777(7) 0.5222(7) 0.0515(17) Uani 0.633(16) 1 d D U . B 2
H3SC H 0.2739 0.3166 0.4734 0.062 Uiso 0.633(16) 1 calc R . . B 2
H3SD H 0.3304 0.2874 0.5458 0.062 Uiso 0.633(16) 1 calc R . . B 2
C4SB C 0.1343(7) 0.3120(5) 0.5610(5) 0.0577(16) Uani 0.633(16) 1 d D U . B 2
H4SC H 0.1386 0.3054 0.6112 0.069 Uiso 0.633(16) 1 calc R . . B 2
H4SD H 0.1086 0.3849 0.5413 0.069 Uiso 0.633(16) 1 calc R . . B 2
C5SB C 0.0455(7) 0.2419(7) 0.5511(5) 0.0494(17) Uani 0.633(16) 1 d D U . B 2
H5SC H -0.0156 0.2239 0.5941 0.059 Uiso 0.633(16) 1 calc R . . B 2
H5SD H -0.0010 0.2754 0.5124 0.059 Uiso 0.633(16) 1 calc R . . B 2

loop_
_atom_site_aniso_label
_atom_site_aniso_U_11
_atom_site_aniso_U_22
_atom_site_aniso_U_33
_atom_site_aniso_U_23
_atom_site_aniso_U_13
_atom_site_aniso_U_12
Fe1 0.01289(8) 0.01423(9) 0.01310(9) -0.00329(7) -0.00361(6) -0.00077(6)
N1 0.0155(5) 0.0171(5) 0.0151(5) -0.0029(4) -0.0040(4) -0.0002(4)
N2 0.0168(5) 0.0153(5) 0.0159(5) -0.0027(4) -0.0038(4) -0.0016(4)
N3 0.0162(5) 0.0152(5) 0.0154(5) -0.0030(4) -0.0059(4) -0.0007(4)
N4 0.0154(5) 0.0154(5) 0.0161(5) -0.0042(4) -0.0026(4) -0.0013(4)
C1 0.0192(6) 0.0206(7) 0.0171(6) -0.0028(5) -0.0031(5) 0.0001(5)
C2 0.0302(7) 0.0250(7) 0.0145(6) -0.0036(5) -0.0057(5) 0.0002(6)
C3 0.0282(7) 0.0263(7) 0.0222(7) -0.0049(6) -0.0137(6) -0.0019(6)
C4 0.0197(6) 0.0202(7) 0.0234(7) -0.0038(5) -0.0088(5) -0.0019(5)
C5 0.0153(6) 0.0149(6) 0.0192(6) -0.0031(5) -0.0055(5) -0.0001(5)
C6 0.0157(6) 0.0146(6) 0.0200(6) -0.0042(5) -0.0044(5) -0.0018(5)
C7 0.0166(6) 0.0256(7) 0.0261(7) -0.0050(6) -0.0044(5) -0.0034(5)
C8 0.0171(6) 0.0316(8) 0.0273(8) -0.0064(6) 0.0026(5) -0.0037(6)
C9 0.0258(7) 0.0256(7) 0.0181(7) -0.0054(6) 0.0013(5) -0.0046(6)
C10 0.0214(6) 0.0179(6) 0.0166(6) -0.0038(5) -0.0037(5) -0.0031(5)
Si1 0.01698(17) 0.01505(17) 0.01847(18) -0.00210(14) -0.00625(13) -0.00046(13)
C11 0.0224(7) 0.0225(7) 0.0214(7) 0.0004(5) -0.0078(5) -0.0023(5)
C12 0.0204(7) 0.0216(7) 0.0295(8) -0.0022(6) -0.0061(6) 0.0030(5)
C13 0.0313(8) 0.0190(7) 0.0299(8) -0.0057(6) -0.0079(6) -0.0027(6)
Si2 0.01594(16) 0.01940(18) 0.01313(16) -0.00257(13) -0.00522(13) -0.00194(13)
C21 0.0249(7) 0.0289(7) 0.0171(7) -0.0057(6) -0.0028(5) -0.0059(6)
C22 0.0195(7) 0.0361(8) 0.0207(7) -0.0056(6) -0.0064(5) -0.0060(6)
C23 0.0313(8) 0.0247(7) 0.0189(7) -0.0018(6) -0.0108(6) 0.0039(6)
Si3 0.01894(17) 0.01524(17) 0.02121(18) -0.00483(14) -0.00202(14) -0.00302(13)
C31 0.0329(8) 0.0247(8) 0.0480(10) -0.0096(7) -0.0190(7) -0.0054(6)
C32 0.0377(9) 0.0205(7) 0.0421(9) -0.0058(7) 0.0144(7) -0.0083(6)
C33 0.0295(7) 0.0172(7) 0.0249(7) -0.0064(5) -0.0045(6) -0.0019(5)
Si4 0.01517(16) 0.01727(17) 0.01683(17) -0.00486(14) -0.00179(13) -0.00137(13)
C41 0.0282(7) 0.0285(8) 0.0215(7) -0.0088(6) 0.0000(6) -0.0023(6)
C42 0.0213(7) 0.0218(7) 0.0248(7) -0.0055(6) 0.0020(5) -0.0046(5)
C43 0.0189(7) 0.0266(7) 0.0333(8) -0.0052(6) -0.0070(6) -0.0009(6)
K1 0.01836(19) 0.0197(2) 0.0196(2) 0.00009(16) -0.00217(15) 0.00171(15)
O1C 0.0185(5) 0.0251(5) 0.0330(6) -0.0023(4) -0.0040(4) -0.0065(4)
C2C 0.0319(8) 0.0246(7) 0.0296(8) -0.0057(6) -0.0044(6) -0.0134(6)
C3C 0.0354(8) 0.0197(7) 0.0332(8) -0.0085(6) -0.0083(6) -0.0063(6)
O4C 0.0264(5) 0.0179(5) 0.0306(5) -0.0077(4) -0.0098(4) 0.0007(4)
C5C 0.0338(8) 0.0236(8) 0.0398(9) -0.0111(7) -0.0148(7) 0.0111(6)
C6C 0.0275(7) 0.0262(8) 0.0325(8) -0.0053(6) -0.0129(6) 0.0089(6)
O7C 0.0221(5) 0.0282(5) 0.0264(5) -0.0043(4) -0.0093(4) 0.0010(4)
C8C 0.0165(6) 0.0389(9) 0.0352(8) -0.0065(7) -0.0111(6) -0.0010(6)
C9C 0.0162(7) 0.0391(9) 0.0386(9) -0.0063(7) -0.0054(6) -0.0085(6)
K2 0.01837(19) 0.01534(19) 0.0361(2) -0.00081(17) -0.01145(17) -0.00230(15)
O1K 0.0190(5) 0.0260(5) 0.0240(5) -0.0004(4) -0.0066(4) 0.0003(4)
C2K 0.0240(7) 0.0240(7) 0.0252(7) 0.0011(6) -0.0107(6) 0.0005(6)
C3K 0.0256(7) 0.0199(7) 0.0248(7) 0.0022(6) -0.0089(6) 0.0005(5)
O4K 0.0219(5) 0.0182(5) 0.0216(5) -0.0001(4) -0.0035(4) -0.0010(4)
C5K 0.0265(7) 0.0264(8) 0.0234(7) 0.0016(6) 0.0027(6) -0.0028(6)
C6K 0.0263(7) 0.0260(7) 0.0208(7) -0.0048(6) 0.0025(6) -0.0003(6)
O7K 0.0230(5) 0.0194(5) 0.0226(5) -0.0050(4) -0.0019(4) 0.0035(4)
C8K 0.0239(7) 0.0239(7) 0.0323(8) -0.0054(6) 0.0001(6) 0.0062(6)
C9K 0.0178(7) 0.0297(8) 0.0351(8) -0.0024(6) -0.0043(6) 0.0033(6)
O1S 0.050(4) 0.096(6) 0.062(4) -0.038(4) -0.023(3) 0.006(4)
C2S 0.059(5) 0.102(8) 0.063(5) -0.052(5) -0.013(4) -0.002(5)
C3S 0.047(6) 0.043(5) 0.046(5) -0.039(4) -0.001(4) 0.006(4)
C4S 0.047(6) 0.060(7) 0.067(7) -0.030(6) -0.015(5) 0.003(4)
C5S 0.036(4) 0.059(7) 0.058(6) -0.027(5) -0.001(4) 0.012(4)
O1SA 0.059(2) 0.0499(18) 0.0356(11) -0.0090(11) -0.0083(13) -0.0216(14)
C2SA 0.053(2) 0.051(2) 0.0423(16) -0.0157(15) -0.0102(15) -0.0205(16)
C3SA 0.057(3) 0.062(4) 0.057(3) 0.002(2) -0.017(2) -0.028(3)
C4SA 0.038(2) 0.046(2) 0.0366(19) -0.0204(17) -0.0088(16) 0.0022(16)
C5SA 0.0297(18) 0.041(3) 0.046(3) -0.0215(19) -0.0065(17) -0.0031(19)
O1S' 0.030(3) 0.040(4) 0.076(7) -0.031(4) -0.005(3) -0.002(2)
C2S' 0.028(4) 0.040(4) 0.041(4) -0.015(3) -0.009(3) 0.004(3)
C3S' 0.063(5) 0.055(5) 0.063(10) -0.012(5) -0.010(5) -0.027(4)
C4S' 0.063(4) 0.043(4) 0.068(7) -0.021(4) 0.011(4) -0.017(3)
C5S' 0.044(4) 0.037(4) 0.098(10) -0.031(5) -0.033(4) 0.010(3)
O1SB 0.048(2) 0.0330(18) 0.063(3) -0.021(2) -0.0033(19) -0.0092(13)
C2SB 0.049(3) 0.070(4) 0.099(6) -0.034(3) 0.010(3) -0.014(3)
C3SB 0.053(3) 0.059(3) 0.043(3) -0.009(2) 0.000(2) -0.026(2)
C4SB 0.064(3) 0.042(3) 0.072(4) -0.027(3) 0.001(3) -0.0127(19)
C5SB 0.055(3) 0.038(2) 0.056(3) -0.019(2) 0.003(2) -0.003(2)

_geom_special_details            
;
 All esds (except the esd in the dihedral angle between two l.s. planes)
 are estimated using the full covariance matrix.  The cell esds are taken
 into account individually in the estimation of esds in distances, angles
 and torsion angles; correlations between esds in cell parameters are only
 used when they are defined by crystal symmetry.  An approximate (isotropic)
 treatment of cell esds is used for estimating esds involving l.s. planes.
;
loop_
_geom_bond_atom_site_label_1
_geom_bond_atom_site_label_2
_geom_bond_distance
_geom_bond_site_symmetry_2
_geom_bond_publ_flag
Fe1 N1 2.0808(10) . ?
Fe1 N2 2.0763(11) . ?
Fe1 N3 2.0146(10) . ?
Fe1 N4 2.0109(11) . ?
N1 C1 1.3583(17) . ?
N1 C5 1.3843(16) . ?
N2 C6 1.3851(16) . ?
N2 C10 1.3529(16) . ?
N3 Si1 1.7032(11) . ?
N3 Si2 1.6976(10) . ?
N4 Si3 1.7046(11) . ?
N4 Si4 1.7013(11) . ?
C1 H1 0.9500 . ?
C1 C2 1.3693(18) . ?
C2 H2 0.9500 . ?
C2 C3 1.415(2) . ?
C3 H3 0.9500 . ?
C3 C4 1.367(2) . ?
C4 H4 0.9500 . ?
C4 C5 1.4178(17) . ?
C5 C6 1.4252(18) . ?
C6 C7 1.4135(18) . ?
C7 H7 0.9500 . ?
C7 C8 1.365(2) . ?
C8 H8 0.9500 . ?
C8 C9 1.417(2) . ?
C9 H9 0.9500 . ?
C9 C10 1.3674(19) . ?
C10 H10 0.9500 . ?
Si1 C11 1.8809(14) . ?
Si1 C12 1.8792(14) . ?
Si1 C13 1.8925(14) . ?
C11 H11A 0.9800 . ?
C11 H11B 0.9800 . ?
C11 H11C 0.9800 . ?
C12 H12A 0.9800 . ?
C12 H12B 0.9800 . ?
C12 H12C 0.9800 . ?
C13 H13A 0.9800 . ?
C13 H13B 0.9800 . ?
C13 H13C 0.9800 . ?
Si2 C21 1.8849(14) . ?
Si2 C22 1.8890(14) . ?
Si2 C23 1.8753(14) . ?
C21 H21A 0.9800 . ?
C21 H21B 0.9800 . ?
C21 H21C 0.9800 . ?
C22 H22A 0.9800 . ?
C22 H22B 0.9800 . ?
C22 H22C 0.9800 . ?
C23 H23A 0.9800 . ?
C23 H23B 0.9800 . ?
C23 H23C 0.9800 . ?
Si3 C31 1.8851(15) . ?
Si3 C32 1.8753(15) . ?
Si3 C33 1.8880(14) . ?
C31 H31A 0.9800 . ?
C31 H31B 0.9800 . ?
C31 H31C 0.9800 . ?
C32 H32A 0.9800 . ?
C32 H32B 0.9800 . ?
C32 H32C 0.9800 . ?
C33 H33A 0.9800 . ?
C33 H33B 0.9800 . ?
C33 H33C 0.9800 . ?
Si4 C41 1.8865(14) . ?
Si4 C42 1.8792(14) . ?
Si4 C43 1.8879(14) . ?
C41 H41A 0.9800 . ?
C41 H41B 0.9800 . ?
C41 H41C 0.9800 . ?
C42 H42A 0.9800 . ?
C42 H42B 0.9800 . ?
C42 H42C 0.9800 . ?
C43 H43A 0.9800 . ?
C43 H43B 0.9800 . ?
C43 H43C 0.9800 . ?
K1 O1K 2.8186(9) 2_556 ?
K1 O1K 2.8186(9) . ?
K1 O4K 2.7721(9) 2_556 ?
K1 O4K 2.7720(9) . ?
K1 O7K 2.8070(9) 2_556 ?
K1 O7K 2.8070(9) . ?
K1 O1S' 2.696(12) 2_556 ?
K1 O1S' 2.697(12) . ?
K1 O1SB 2.773(7) 2_556 ?
K1 O1SB 2.773(7) . ?
O1C C2C 1.4239(17) . ?
O1C C9C 1.4214(17) 2_575 ?
O1C K2 2.8002(9) . ?
C2C H2CA 0.9900 . ?
C2C H2CB 0.9900 . ?
C2C C3C 1.499(2) . ?
C3C H3CA 0.9900 . ?
C3C H3CB 0.9900 . ?
C3C O4C 1.4225(17) . ?
O4C C5C 1.4251(17) . ?
O4C K2 2.7466(9) . ?
C5C H5CA 0.9900 . ?
C5C H5CB 0.9900 . ?
C5C C6C 1.497(2) . ?
C6C H6CA 0.9900 . ?
C6C H6CB 0.9900 . ?
C6C O7C 1.4285(18) . ?
O7C C8C 1.4201(17) . ?
O7C K2 2.8597(9) . ?
C8C H8CA 0.9900 . ?
C8C H8CB 0.9900 . ?
C8C C9C 1.498(2) . ?
C9C O1C 1.4214(17) 2_575 ?
C9C H9CA 0.9900 . ?
C9C H9CB 0.9900 . ?
K2 O1C 2.8002(9) 2_575 ?
K2 O4C 2.7466(9) 2_575 ?
K2 O7C 2.8596(10) 2_575 ?
K2 O1S 2.708(9) 2_575 ?
K2 O1S 2.708(9) . ?
K2 C2S 3.529(10) 2_575 ?
K2 C2S 3.529(10) . ?
K2 O1SA 2.742(3) . ?
K2 O1SA 2.742(3) 2_575 ?
O1K C2K 1.4241(17) . ?
O1K C9K 1.4215(17) 2_556 ?
C2K H2KA 0.9900 . ?
C2K H2KB 0.9900 . ?
C2K C3K 1.5003(19) . ?
C3K H3KA 0.9900 . ?
C3K H3KB 0.9900 . ?
C3K O4K 1.4261(16) . ?
O4K C5K 1.4200(16) . ?
C5K H5KA 0.9900 . ?
C5K H5KB 0.9900 . ?
C5K C6K 1.499(2) . ?
C6K H6KA 0.9900 . ?
C6K H6KB 0.9900 . ?
C6K O7K 1.4239(17) . ?
O7K C8K 1.4269(16) . ?
C8K H8KA 0.9900 . ?
C8K H8KB 0.9900 . ?
C8K C9K 1.496(2) . ?
C9K O1K 1.4215(17) 2_556 ?
C9K H9KA 0.9900 . ?
C9K H9KB 0.9900 . ?
O1S C2S 1.400(11) . ?
O1S C5S 1.381(12) . ?
C2S H2SE 0.9900 . ?
C2S H2SF 0.9900 . ?
C2S C3S 1.544(13) . ?
C3S H3SE 0.9900 . ?
C3S H3SF 0.9900 . ?
C3S C4S 1.535(13) . ?
C4S H4SE 0.9900 . ?
C4S H4SF 0.9900 . ?
C4S C5S 1.473(13) . ?
C5S H5SE 0.9900 . ?
C5S H5SF 0.9900 . ?
O1SA C2SA 1.446(4) . ?
O1SA C5SA 1.432(5) . ?
C2SA H2SG 0.9900 . ?
C2SA H2SH 0.9900 . ?
C2SA C3SA 1.489(6) . ?
C3SA H3SG 0.9900 . ?
C3SA H3SH 0.9900 . ?
C3SA C4SA 1.524(6) . ?
C4SA H4SG 0.9900 . ?
C4SA H4SH 0.9900 . ?
C4SA C5SA 1.493(5) . ?
C5SA H5SG 0.9900 . ?
C5SA H5SH 0.9900 . ?
O1S' C2S' 1.454(10) . ?
O1S' C5S' 1.376(11) . ?
C2S' H2SA 0.9900 . ?
C2S' H2SB 0.9900 . ?
C2S' C3S' 1.522(12) . ?
C3S' H3SA 0.9900 . ?
C3S' H3SB 0.9900 . ?
C3S' C4S' 1.526(13) . ?
C4S' H4SA 0.9900 . ?
C4S' H4SB 0.9900 . ?
C4S' C5S' 1.403(11) . ?
C5S' H5SA 0.9900 . ?
C5S' H5SB 0.9900 . ?
O1SB C2SB 1.440(8) . ?
O1SB C5SB 1.419(7) . ?
C2SB H2SC 0.9900 . ?
C2SB H2SD 0.9900 . ?
C2SB C3SB 1.485(8) . ?
C3SB H3SC 0.9900 . ?
C3SB H3SD 0.9900 . ?
C3SB C4SB 1.525(8) . ?
C4SB H4SC 0.9900 . ?
C4SB H4SD 0.9900 . ?
C4SB C5SB 1.477(7) . ?
C5SB H5SC 0.9900 . ?
C5SB H5SD 0.9900 . ?

loop_
_geom_angle_atom_site_label_1
_geom_angle_atom_site_label_2
_geom_angle_atom_site_label_3
_geom_angle
_geom_angle_site_symmetry_1
_geom_angle_site_symmetry_3
_geom_angle_publ_flag
N2 Fe1 N1 77.17(4) . . ?
N3 Fe1 N1 121.35(4) . . ?
N3 Fe1 N2 101.51(4) . . ?
N4 Fe1 N1 100.44(4) . . ?
N4 Fe1 N2 120.77(4) . . ?
N4 Fe1 N3 126.28(4) . . ?
C1 N1 Fe1 125.32(9) . . ?
C1 N1 C5 117.43(11) . . ?
C5 N1 Fe1 116.16(8) . . ?
C6 N2 Fe1 116.53(8) . . ?
C10 N2 Fe1 125.43(8) . . ?
C10 N2 C6 117.65(11) . . ?
Si1 N3 Fe1 115.52(5) . . ?
Si2 N3 Fe1 117.68(6) . . ?
Si2 N3 Si1 125.47(6) . . ?
Si3 N4 Fe1 116.90(6) . . ?
Si4 N4 Fe1 118.44(6) . . ?
Si4 N4 Si3 122.39(6) . . ?
N1 C1 H1 117.8 . . ?
N1 C1 C2 124.46(12) . . ?
C2 C1 H1 117.8 . . ?
C1 C2 H2 120.8 . . ?
C1 C2 C3 118.31(13) . . ?
C3 C2 H2 120.8 . . ?
C2 C3 H3 120.6 . . ?
C4 C3 C2 118.90(12) . . ?
C4 C3 H3 120.6 . . ?
C3 C4 H4 119.7 . . ?
C3 C4 C5 120.62(12) . . ?
C5 C4 H4 119.7 . . ?
N1 C5 C4 120.26(12) . . ?
N1 C5 C6 114.89(11) . . ?
C4 C5 C6 124.82(12) . . ?
N2 C6 C5 114.73(11) . . ?
N2 C6 C7 120.42(12) . . ?
C7 C6 C5 124.82(12) . . ?
C6 C7 H7 119.8 . . ?
C8 C7 C6 120.38(13) . . ?
C8 C7 H7 119.8 . . ?
C7 C8 H8 120.5 . . ?
C7 C8 C9 118.91(13) . . ?
C9 C8 H8 120.5 . . ?
C8 C9 H9 120.8 . . ?
C10 C9 C8 118.46(13) . . ?
C10 C9 H9 120.8 . . ?
N2 C10 C9 124.18(12) . . ?
N2 C10 H10 117.9 . . ?
C9 C10 H10 117.9 . . ?
N3 Si1 C11 111.72(6) . . ?
N3 Si1 C12 112.88(6) . . ?
N3 Si1 C13 114.60(6) . . ?
C11 Si1 C13 106.24(7) . . ?
C12 Si1 C11 106.38(6) . . ?
C12 Si1 C13 104.35(7) . . ?
Si1 C11 H11A 109.5 . . ?
Si1 C11 H11B 109.5 . . ?
Si1 C11 H11C 109.5 . . ?
H11A C11 H11B 109.5 . . ?
H11A C11 H11C 109.5 . . ?
H11B C11 H11C 109.5 . . ?
Si1 C12 H12A 109.5 . . ?
Si1 C12 H12B 109.5 . . ?
Si1 C12 H12C 109.5 . . ?
H12A C12 H12B 109.5 . . ?
H12A C12 H12C 109.5 . . ?
H12B C12 H12C 109.5 . . ?
Si1 C13 H13A 109.5 . . ?
Si1 C13 H13B 109.5 . . ?
Si1 C13 H13C 109.5 . . ?
H13A C13 H13B 109.5 . . ?
H13A C13 H13C 109.5 . . ?
H13B C13 H13C 109.5 . . ?
N3 Si2 C21 113.41(6) . . ?
N3 Si2 C22 113.75(6) . . ?
N3 Si2 C23 112.03(6) . . ?
C21 Si2 C22 106.66(6) . . ?
C23 Si2 C21 105.33(7) . . ?
C23 Si2 C22 104.93(7) . . ?
Si2 C21 H21A 109.5 . . ?
Si2 C21 H21B 109.5 . . ?
Si2 C21 H21C 109.5 . . ?
H21A C21 H21B 109.5 . . ?
H21A C21 H21C 109.5 . . ?
H21B C21 H21C 109.5 . . ?
Si2 C22 H22A 109.5 . . ?
Si2 C22 H22B 109.5 . . ?
Si2 C22 H22C 109.5 . . ?
H22A C22 H22B 109.5 . . ?
H22A C22 H22C 109.5 . . ?
H22B C22 H22C 109.5 . . ?
Si2 C23 H23A 109.5 . . ?
Si2 C23 H23B 109.5 . . ?
Si2 C23 H23C 109.5 . . ?
H23A C23 H23B 109.5 . . ?
H23A C23 H23C 109.5 . . ?
H23B C23 H23C 109.5 . . ?
N4 Si3 C31 113.76(6) . . ?
N4 Si3 C32 113.25(6) . . ?
N4 Si3 C33 113.20(6) . . ?
C31 Si3 C33 104.84(7) . . ?
C32 Si3 C31 106.63(8) . . ?
C32 Si3 C33 104.31(7) . . ?
Si3 C31 H31A 109.5 . . ?
Si3 C31 H31B 109.5 . . ?
Si3 C31 H31C 109.5 . . ?
H31A C31 H31B 109.5 . . ?
H31A C31 H31C 109.5 . . ?
H31B C31 H31C 109.5 . . ?
Si3 C32 H32A 109.5 . . ?
Si3 C32 H32B 109.5 . . ?
Si3 C32 H32C 109.5 . . ?
H32A C32 H32B 109.5 . . ?
H32A C32 H32C 109.5 . . ?
H32B C32 H32C 109.5 . . ?
Si3 C33 H33A 109.5 . . ?
Si3 C33 H33B 109.5 . . ?
Si3 C33 H33C 109.5 . . ?
H33A C33 H33B 109.5 . . ?
H33A C33 H33C 109.5 . . ?
H33B C33 H33C 109.5 . . ?
N4 Si4 C41 113.11(6) . . ?
N4 Si4 C42 112.28(6) . . ?
N4 Si4 C43 113.71(6) . . ?
C41 Si4 C43 106.10(7) . . ?
C42 Si4 C41 104.76(7) . . ?
C42 Si4 C43 106.16(6) . . ?
Si4 C41 H41A 109.5 . . ?
Si4 C41 H41B 109.5 . . ?
Si4 C41 H41C 109.5 . . ?
H41A C41 H41B 109.5 . . ?
H41A C41 H41C 109.5 . . ?
H41B C41 H41C 109.5 . . ?
Si4 C42 H42A 109.5 . . ?
Si4 C42 H42B 109.5 . . ?
Si4 C42 H42C 109.5 . . ?
H42A C42 H42B 109.5 . . ?
H42A C42 H42C 109.5 . . ?
H42B C42 H42C 109.5 . . ?
Si4 C43 H43A 109.5 . . ?
Si4 C43 H43B 109.5 . . ?
Si4 C43 H43C 109.5 . . ?
H43A C43 H43B 109.5 . . ?
H43A C43 H43C 109.5 . . ?
H43B C43 H43C 109.5 . . ?
O1K K1 O1K 180.0 . 2_556 ?
O4K K1 O1K 60.80(3) . . ?
O4K K1 O1K 119.20(3) 2_556 . ?
O4K K1 O1K 119.20(3) . 2_556 ?
O4K K1 O1K 60.80(3) 2_556 2_556 ?
O4K K1 O4K 180.0 . 2_556 ?
O4K K1 O7K 118.46(3) . 2_556 ?
O4K K1 O7K 61.54(3) . . ?
O4K K1 O7K 61.54(3) 2_556 2_556 ?
O4K K1 O7K 118.46(3) 2_556 . ?
O4K K1 O1SB 93.48(17) . . ?
O4K K1 O1SB 93.48(17) 2_556 2_556 ?
O4K K1 O1SB 86.52(17) 2_556 . ?
O4K K1 O1SB 86.52(17) . 2_556 ?
O7K K1 O1K 59.19(3) . 2_556 ?
O7K K1 O1K 120.81(3) 2_556 2_556 ?
O7K K1 O1K 59.20(3) 2_556 . ?
O7K K1 O1K 120.81(3) . . ?
O7K K1 O7K 180.00(4) 2_556 . ?
O1S' K1 O1K 94.2(3) 2_556 . ?
O1S' K1 O1K 85.8(3) . . ?
O1S' K1 O1K 85.8(3) 2_556 2_556 ?
O1S' K1 O1K 94.2(3) . 2_556 ?
O1S' K1 O4K 95.3(3) 2_556 . ?
O1S' K1 O4K 84.7(3) . . ?
O1S' K1 O4K 95.3(3) . 2_556 ?
O1S' K1 O4K 84.7(3) 2_556 2_556 ?
O1S' K1 O7K 76.8(3) 2_556 2_556 ?
O1S' K1 O7K 103.2(3) 2_556 . ?
O1S' K1 O7K 76.8(3) . . ?
O1S' K1 O7K 103.2(3) . 2_556 ?
O1S' K1 O1S' 180.0 2_556 . ?
O1SB K1 O1K 90.74(16) 2_556 2_556 ?
O1SB K1 O1K 89.26(16) 2_556 . ?
O1SB K1 O1K 89.26(16) . 2_556 ?
O1SB K1 O1K 90.74(16) . . ?
O1SB K1 O7K 80.40(17) . . ?
O1SB K1 O7K 99.59(17) . 2_556 ?
O1SB K1 O7K 80.41(17) 2_556 2_556 ?
O1SB K1 O7K 99.59(17) 2_556 . ?
O1SB K1 O1SB 180.0 . 2_556 ?
C2C O1C K2 113.80(8) . . ?
C9C O1C C2C 112.84(11) 2_575 . ?
C9C O1C K2 116.66(8) 2_575 . ?
O1C C2C H2CA 110.1 . . ?
O1C C2C H2CB 110.1 . . ?
O1C C2C C3C 108.08(12) . . ?
H2CA C2C H2CB 108.4 . . ?
C3C C2C H2CA 110.1 . . ?
C3C C2C H2CB 110.1 . . ?
C2C C3C H3CA 110.1 . . ?
C2C C3C H3CB 110.1 . . ?
H3CA C3C H3CB 108.4 . . ?
O4C C3C C2C 108.21(12) . . ?
O4C C3C H3CA 110.1 . . ?
O4C C3C H3CB 110.1 . . ?
C3C O4C C5C 112.19(11) . . ?
C3C O4C K2 114.68(8) . . ?
C5C O4C K2 116.30(8) . . ?
O4C C5C H5CA 110.0 . . ?
O4C C5C H5CB 110.0 . . ?
O4C C5C C6C 108.27(12) . . ?
H5CA C5C H5CB 108.4 . . ?
C6C C5C H5CA 110.0 . . ?
C6C C5C H5CB 110.0 . . ?
C5C C6C H6CA 110.0 . . ?
C5C C6C H6CB 110.0 . . ?
H6CA C6C H6CB 108.3 . . ?
O7C C6C C5C 108.66(12) . . ?
O7C C6C H6CA 110.0 . . ?
O7C C6C H6CB 110.0 . . ?
C6C O7C K2 109.65(8) . . ?
C8C O7C C6C 111.83(11) . . ?
C8C O7C K2 113.49(8) . . ?
O7C C8C H8CA 110.0 . . ?
O7C C8C H8CB 110.0 . . ?
O7C C8C C9C 108.52(12) . . ?
H8CA C8C H8CB 108.4 . . ?
C9C C8C H8CA 110.0 . . ?
C9C C8C H8CB 110.0 . . ?
O1C C9C C8C 108.10(12) 2_575 . ?
O1C C9C H9CA 110.1 2_575 . ?
O1C C9C H9CB 110.1 2_575 . ?
C8C C9C H9CA 110.1 . . ?
C8C C9C H9CB 110.1 . . ?
H9CA C9C H9CB 108.4 . . ?
O1C K2 O1C 180.00(4) . 2_575 ?
O1C K2 O7C 59.46(3) 2_575 . ?
O1C K2 O7C 120.54(3) . . ?
O1C K2 O7C 59.46(3) . 2_575 ?
O1C K2 O7C 120.54(3) 2_575 2_575 ?
O1C K2 C2S 104.51(15) 2_575 . ?
O1C K2 C2S 75.49(16) . . ?
O1C K2 C2S 104.51(15) . 2_575 ?
O1C K2 C2S 75.49(15) 2_575 2_575 ?
O4C K2 O1C 60.87(3) . . ?
O4C K2 O1C 119.13(3) 2_575 . ?
O4C K2 O1C 60.87(3) 2_575 2_575 ?
O4C K2 O1C 119.13(3) . 2_575 ?
O4C K2 O4C 180.0 . 2_575 ?
O4C K2 O7C 61.01(3) 2_575 2_575 ?
O4C K2 O7C 118.99(3) . 2_575 ?
O4C K2 O7C 61.01(3) . . ?
O4C K2 O7C 118.99(3) 2_575 . ?
O4C K2 C2S 75.4(3) 2_575 2_575 ?
O4C K2 C2S 104.6(3) . 2_575 ?
O4C K2 C2S 104.6(3) 2_575 . ?
O4C K2 C2S 75.4(3) . . ?
O7C K2 O7C 180.0 2_575 . ?
O7C K2 C2S 101.1(3) 2_575 2_575 ?
O7C K2 C2S 78.9(3) 2_575 . ?
O7C K2 C2S 78.9(3) . 2_575 ?
O7C K2 C2S 101.1(3) . . ?
O1S K2 O1C 83.5(2) 2_575 . ?
O1S K2 O1C 96.5(2) 2_575 2_575 ?
O1S K2 O1C 96.5(2) . . ?
O1S K2 O1C 83.5(2) . 2_575 ?
O1S K2 O4C 87.7(3) 2_575 2_575 ?
O1S K2 O4C 87.7(3) . . ?
O1S K2 O4C 92.3(3) 2_575 . ?
O1S K2 O4C 92.3(3) . 2_575 ?
O1S K2 O7C 92.8(3) . . ?
O1S K2 O7C 92.8(3) 2_575 2_575 ?
O1S K2 O7C 87.2(3) . 2_575 ?
O1S K2 O7C 87.2(3) 2_575 . ?
O1S K2 O1S 180.0 2_575 . ?
O1S K2 C2S 21.1(2) . . ?
O1S K2 C2S 158.9(2) . 2_575 ?
O1S K2 C2S 158.9(2) 2_575 . ?
O1S K2 C2S 21.1(2) 2_575 2_575 ?
C2S K2 C2S 180.0 . 2_575 ?
O1SA K2 O1C 82.06(7) . 2_575 ?
O1SA K2 O1C 97.95(7) 2_575 2_575 ?
O1SA K2 O1C 97.94(7) . . ?
O1SA K2 O1C 82.05(7) 2_575 . ?
O1SA K2 O4C 77.56(9) . . ?
O1SA K2 O4C 102.44(9) . 2_575 ?
O1SA K2 O4C 77.56(9) 2_575 2_575 ?
O1SA K2 O4C 102.44(9) 2_575 . ?
O1SA K2 O7C 98.94(12) . 2_575 ?
O1SA K2 O7C 81.06(12) . . ?
O1SA K2 O7C 81.06(12) 2_575 2_575 ?
O1SA K2 O7C 98.94(12) 2_575 . ?
O1SA K2 O1SA 180.0 . 2_575 ?
C2K O1K K1 113.71(8) . . ?
C9K O1K K1 116.36(8) 2_556 . ?
C9K O1K C2K 111.96(10) 2_556 . ?
O1K C2K H2KA 110.0 . . ?
O1K C2K H2KB 110.0 . . ?
O1K C2K C3K 108.37(11) . . ?
H2KA C2K H2KB 108.4 . . ?
C3K C2K H2KA 110.0 . . ?
C3K C2K H2KB 110.0 . . ?
C2K C3K H3KA 110.0 . . ?
C2K C3K H3KB 110.0 . . ?
H3KA C3K H3KB 108.4 . . ?
O4K C3K C2K 108.55(11) . . ?
O4K C3K H3KA 110.0 . . ?
O4K C3K H3KB 110.0 . . ?
C3K O4K K1 114.12(8) . . ?
C5K O4K K1 113.80(8) . . ?
C5K O4K C3K 111.55(10) . . ?
O4K C5K H5KA 109.9 . . ?
O4K C5K H5KB 109.9 . . ?
O4K C5K C6K 108.96(11) . . ?
H5KA C5K H5KB 108.3 . . ?
C6K C5K H5KA 109.9 . . ?
C6K C5K H5KB 109.9 . . ?
C5K C6K H6KA 109.8 . . ?
C5K C6K H6KB 109.8 . . ?
H6KA C6K H6KB 108.3 . . ?
O7K C6K C5K 109.16(11) . . ?
O7K C6K H6KA 109.8 . . ?
O7K C6K H6KB 109.8 . . ?
C6K O7K K1 112.06(8) . . ?
C6K O7K C8K 111.72(10) . . ?
C8K O7K K1 116.34(8) . . ?
O7K C8K H8KA 110.0 . . ?
O7K C8K H8KB 110.0 . . ?
O7K C8K C9K 108.40(12) . . ?
H8KA C8K H8KB 108.4 . . ?
C9K C8K H8KA 110.0 . . ?
C9K C8K H8KB 110.0 . . ?
O1K C9K C8K 108.07(12) 2_556 . ?
O1K C9K H9KA 110.1 2_556 . ?
O1K C9K H9KB 110.1 2_556 . ?
C8K C9K H9KA 110.1 . . ?
C8K C9K H9KB 110.1 . . ?
H9KA C9K H9KB 108.4 . . ?
C2S O1S K2 114.6(6) . . ?
C5S O1S K2 127.3(9) . . ?
C5S O1S C2S 115.9(10) . . ?
K2 C2S H2SE 76.7 . . ?
K2 C2S H2SF 96.9 . . ?
O1S C2S K2 44.2(5) . . ?
O1S C2S H2SE 110.6 . . ?
O1S C2S H2SF 110.6 . . ?
O1S C2S C3S 105.6(8) . . ?
H2SE C2S H2SF 108.8 . . ?
C3S C2S K2 146.2(7) . . ?
C3S C2S H2SE 110.6 . . ?
C3S C2S H2SF 110.6 . . ?
C2S C3S H3SE 111.5 . . ?
C2S C3S H3SF 111.5 . . ?
H3SE C3S H3SF 109.4 . . ?
C4S C3S C2S 101.1(9) . . ?
C4S C3S H3SE 111.5 . . ?
C4S C3S H3SF 111.5 . . ?
C3S C4S H4SE 110.1 . . ?
C3S C4S H4SF 110.1 . . ?
H4SE C4S H4SF 108.4 . . ?
C5S C4S C3S 107.9(12) . . ?
C5S C4S H4SE 110.1 . . ?
C5S C4S H4SF 110.1 . . ?
O1S C5S C4S 103.5(11) . . ?
O1S C5S H5SE 111.1 . . ?
O1S C5S H5SF 111.1 . . ?
C4S C5S H5SE 111.1 . . ?
C4S C5S H5SF 111.1 . . ?
H5SE C5S H5SF 109.0 . . ?
C2SA O1SA K2 113.5(2) . . ?
C5SA O1SA K2 137.0(3) . . ?
C5SA O1SA C2SA 107.8(3) . . ?
O1SA C2SA H2SG 110.3 . . ?
O1SA C2SA H2SH 110.3 . . ?
O1SA C2SA C3SA 107.2(3) . . ?
H2SG C2SA H2SH 108.5 . . ?
C3SA C2SA H2SG 110.3 . . ?
C3SA C2SA H2SH 110.3 . . ?
C2SA C3SA H3SG 111.3 . . ?
C2SA C3SA H3SH 111.3 . . ?
C2SA C3SA C4SA 102.1(4) . . ?
H3SG C3SA H3SH 109.2 . . ?
C4SA C3SA H3SG 111.3 . . ?
C4SA C3SA H3SH 111.3 . . ?
C3SA C4SA H4SG 111.4 . . ?
C3SA C4SA H4SH 111.4 . . ?
H4SG C4SA H4SH 109.3 . . ?
C5SA C4SA C3SA 101.7(4) . . ?
C5SA C4SA H4SG 111.4 . . ?
C5SA C4SA H4SH 111.4 . . ?
O1SA C5SA C4SA 107.6(4) . . ?
O1SA C5SA H5SG 110.2 . . ?
O1SA C5SA H5SH 110.2 . . ?
C4SA C5SA H5SG 110.2 . . ?
C4SA C5SA H5SH 110.2 . . ?
H5SG C5SA H5SH 108.5 . . ?
C2S' O1S' K1 127.4(8) . . ?
C5S' O1S' K1 120.2(8) . . ?
C5S' O1S' C2S' 107.5(9) . . ?
O1S' C2S' H2SA 110.9 . . ?
O1S' C2S' H2SB 110.9 . . ?
O1S' C2S' C3S' 104.3(9) . . ?
H2SA C2S' H2SB 108.9 . . ?
C3S' C2S' H2SA 110.9 . . ?
C3S' C2S' H2SB 110.9 . . ?
C2S' C3S' H3SA 110.7 . . ?
C2S' C3S' H3SB 110.7 . . ?
C2S' C3S' C4S' 105.3(9) . . ?
H3SA C3S' H3SB 108.8 . . ?
C4S' C3S' H3SA 110.7 . . ?
C4S' C3S' H3SB 110.7 . . ?
C3S' C4S' H4SA 110.9 . . ?
C3S' C4S' H4SB 110.9 . . ?
H4SA C4S' H4SB 108.9 . . ?
C5S' C4S' C3S' 104.5(9) . . ?
C5S' C4S' H4SA 110.9 . . ?
C5S' C4S' H4SB 110.9 . . ?
O1S' C5S' C4S' 112.2(10) . . ?
O1S' C5S' H5SA 109.2 . . ?
O1S' C5S' H5SB 109.2 . . ?
C4S' C5S' H5SA 109.2 . . ?
C4S' C5S' H5SB 109.2 . . ?
H5SA C5S' H5SB 107.9 . . ?
C2SB O1SB K1 128.9(6) . . ?
C5SB O1SB K1 118.9(5) . . ?
C5SB O1SB C2SB 110.6(6) . . ?
O1SB C2SB H2SC 110.4 . . ?
O1SB C2SB H2SD 110.4 . . ?
O1SB C2SB C3SB 106.8(6) . . ?
H2SC C2SB H2SD 108.6 . . ?
C3SB C2SB H2SC 110.4 . . ?
C3SB C2SB H2SD 110.4 . . ?
C2SB C3SB H3SC 111.1 . . ?
C2SB C3SB H3SD 111.1 . . ?
C2SB C3SB C4SB 103.2(6) . . ?
H3SC C3SB H3SD 109.1 . . ?
C4SB C3SB H3SC 111.1 . . ?
C4SB C3SB H3SD 111.1 . . ?
C3SB C4SB H4SC 110.7 . . ?
C3SB C4SB H4SD 110.7 . . ?
H4SC C4SB H4SD 108.8 . . ?
C5SB C4SB C3SB 105.1(5) . . ?
C5SB C4SB H4SC 110.7 . . ?
C5SB C4SB H4SD 110.7 . . ?
O1SB C5SB C4SB 106.7(5) . . ?
O1SB C5SB H5SC 110.4 . . ?
O1SB C5SB H5SD 110.4 . . ?
C4SB C5SB H5SC 110.4 . . ?
C4SB C5SB H5SD 110.4 . . ?
H5SC C5SB H5SD 108.6 . . ?

loop_
_geom_torsion_atom_site_label_1
_geom_torsion_atom_site_label_2
_geom_torsion_atom_site_label_3
_geom_torsion_atom_site_label_4
_geom_torsion
_geom_torsion_site_symmetry_1
_geom_torsion_site_symmetry_2
_geom_torsion_site_symmetry_3
_geom_torsion_site_symmetry_4
_geom_torsion_publ_flag
Fe1 N1 C1 C2 -168.96(10) . . . . ?
Fe1 N1 C5 C4 170.33(9) . . . . ?
Fe1 N1 C5 C6 -8.07(14) . . . . ?
Fe1 N2 C6 C5 -3.60(14) . . . . ?
Fe1 N2 C6 C7 174.31(9) . . . . ?
Fe1 N2 C10 C9 -173.52(10) . . . . ?
Fe1 N3 Si1 C11 62.66(8) . . . . ?
Fe1 N3 Si1 C12 -57.17(8) . . . . ?
Fe1 N3 Si1 C13 -176.45(6) . . . . ?
Fe1 N3 Si2 C21 112.73(7) . . . . ?
Fe1 N3 Si2 C22 -125.14(7) . . . . ?
Fe1 N3 Si2 C23 -6.35(9) . . . . ?
Fe1 N4 Si3 C31 -76.17(8) . . . . ?
Fe1 N4 Si3 C32 45.79(9) . . . . ?
Fe1 N4 Si3 C33 164.27(6) . . . . ?
Fe1 N4 Si4 C41 111.40(7) . . . . ?
Fe1 N4 Si4 C42 -6.92(9) . . . . ?
Fe1 N4 Si4 C43 -127.48(7) . . . . ?
N1 C1 C2 C3 0.2(2) . . . . ?
N1 C5 C6 N2 7.55(16) . . . . ?
N1 C5 C6 C7 -170.26(12) . . . . ?
N2 C6 C7 C8 -0.6(2) . . . . ?
C1 N1 C5 C4 1.57(18) . . . . ?
C1 N1 C5 C6 -176.83(11) . . . . ?
C1 C2 C3 C4 0.8(2) . . . . ?
C2 C3 C4 C5 -0.5(2) . . . . ?
C3 C4 C5 N1 -0.7(2) . . . . ?
C3 C4 C5 C6 177.57(13) . . . . ?
C4 C5 C6 N2 -170.76(12) . . . . ?
C4 C5 C6 C7 11.4(2) . . . . ?
C5 N1 C1 C2 -1.35(19) . . . . ?
C5 C6 C7 C8 177.12(13) . . . . ?
C6 N2 C10 C9 -0.96(19) . . . . ?
C6 C7 C8 C9 -0.1(2) . . . . ?
C7 C8 C9 C10 0.3(2) . . . . ?
C8 C9 C10 N2 0.3(2) . . . . ?
C10 N2 C6 C5 -176.83(11) . . . . ?
C10 N2 C6 C7 1.08(18) . . . . ?
Si1 N3 Si2 C21 -53.46(10) . . . . ?
Si1 N3 Si2 C22 68.66(9) . . . . ?
Si1 N3 Si2 C23 -172.55(8) . . . . ?
Si2 N3 Si1 C11 -130.88(8) . . . . ?
Si2 N3 Si1 C12 109.29(8) . . . . ?
Si2 N3 Si1 C13 -9.99(10) . . . . ?
Si3 N4 Si4 C41 -50.95(9) . . . . ?
Si3 N4 Si4 C42 -169.27(7) . . . . ?
Si3 N4 Si4 C43 70.17(9) . . . . ?
Si4 N4 Si3 C31 86.43(9) . . . . ?
Si4 N4 Si3 C32 -151.61(8) . . . . ?
Si4 N4 Si3 C33 -33.12(10) . . . . ?
K1 O1K C2K C3K -47.96(12) . . . . ?
K1 O4K C5K C6K 49.31(13) . . . . ?
K1 O7K C8K C9K -48.76(13) . . . . ?
K1 O1S' C2S' C3S' -177.6(13) . . . . ?
K1 O1S' C5S' C4S' -176.6(9) . . . . ?
K1 O1SB C2SB C3SB 154.9(7) . . . . ?
K1 O1SB C5SB C4SB -174.6(4) . . . . ?
O1C C2C C3C O4C 66.63(15) . . . . ?
C2C C3C O4C C5C 172.68(12) . . . . ?
C2C C3C O4C K2 -51.76(13) . . . . ?
C3C O4C C5C C6C -178.46(12) . . . . ?
O4C C5C C6C O7C -68.90(16) . . . . ?
C5C C6C O7C C8C -178.87(12) . . . . ?
C5C C6C O7C K2 54.34(13) . . . . ?
C6C O7C C8C C9C -175.78(12) . . . . ?
O7C C8C C9C O1C 66.08(16) . . . 2_575 ?
C9C O1C C2C C3C 176.05(12) 2_575 . . . ?
K2 O1C C2C C3C -48.07(13) . . . . ?
K2 O4C C5C C6C 46.75(15) . . . . ?
K2 O7C C8C C9C -51.10(13) . . . . ?
K2 O1S C2S C3S 162.0(10) . . . . ?
K2 O1S C5S C4S -145.4(14) . . . . ?
K2 C2S C3S C4S 11(2) . . . . ?
K2 O1SA C2SA C3SA -156.3(5) . . . . ?
K2 O1SA C5SA C4SA 176.1(5) . . . . ?
O1K C2K C3K O4K 67.09(14) . . . . ?
C2K C3K O4K K1 -51.91(12) . . . . ?
C2K C3K O4K C5K 177.39(11) . . . . ?
C3K O4K C5K C6K -179.83(11) . . . . ?
O4K C5K C6K O7K -67.89(15) . . . . ?
C5K C6K O7K K1 50.19(12) . . . . ?
C5K C6K O7K C8K -177.22(11) . . . . ?
C6K O7K C8K C9K -179.17(11) . . . . ?
O7K C8K C9K O1K 63.39(15) . . . 2_556 ?
C9K O1K C2K C3K 177.62(11) 2_556 . . . ?
O1S C2S C3S C4S -12.2(14) . . . . ?
C2S O1S C5S C4S 17.0(19) . . . . ?
C2S C3S C4S C5S 22.4(17) . . . . ?
C3S C4S C5S O1S -24.3(19) . . . . ?
C5S O1S C2S K2 -164.7(15) . . . . ?
C5S O1S C2S C3S -2.7(15) . . . . ?
O1SA C2SA C3SA C4SA -30.1(6) . . . . ?
C2SA O1SA C5SA C4SA 12.5(6) . . . . ?
C2SA C3SA C4SA C5SA 36.2(7) . . . . ?
C3SA C4SA C5SA O1SA -30.6(7) . . . . ?
C5SA O1SA C2SA C3SA 11.6(6) . . . . ?
O1S' C2S' C3S' C4S' 11.9(17) . . . . ?
C2S' O1S' C5S' C4S' 26.3(18) . . . . ?
C2S' C3S' C4S' C5S' 2.4(19) . . . . ?
C3S' C4S' C5S' O1S' -17.5(19) . . . . ?
C5S' O1S' C2S' C3S' -22.7(16) . . . . ?
O1SB C2SB C3SB C4SB 23.1(11) . . . . ?
C2SB O1SB C5SB C4SB -7.9(11) . . . . ?
C2SB C3SB C4SB C5SB -27.7(11) . . . . ?
C3SB C4SB C5SB O1SB 22.3(10) . . . . ?
C5SB O1SB C2SB C3SB -10.1(11) . . . . ?

_shelx_res_file                  
;
    k{18c6}fe7.res created by SHELXL-2014/7

TITL Gw46_0m_a.res in P-1
REM Old TITL Gw46_0m in P-1
REM SHELXT solution in P-1
REM R1 0.102, Rweak 0.006, Alpha 0.043, Orientation as input
REM Formula found by SHELXT: C44 Fe K N4 O6 Si4
REM #####
CELL 0.71073 10.8613 13.2627 19.8669 77.597 80.062 83.452
ZERR 2 0.0005 0.0006 0.0009 0.001 0.002 0.002
LATT 1
SFAC C H Fe K N O Si
UNIT 84 168 2 2 8 16 8
SIMU O1S > C5SA
SIMU O1S' C2S' C3S' C4S' C5S' O1SB C2SB C3SB C4SB C5SB
RIGU O1S C2S C3S C4S C5S O1SA C2SA C3SA C4SA C5SA
RIGU O1S' C2S' C3S' C4S' C5S' O1SB C2SB C3SB C4SB C5SB
ISOR O1S > C5SA
ISOR O1S' C2S' C3S' C4S' C5S' O1SB C2SB C3SB C4SB C5SB

L.S. 10
PLAN  10
SIZE 0.11 0.2 0.21
TEMP -173.15
BOND $H
LIST 4
conf
fmap 2
acta
OMIT 0 1 2
OMIT 3 6 9
REM <olex2.extras>
REM <HklSrc "%.\\Gw46_0m.hkl">
REM </olex2.extras>

WGHT    0.026600    1.223100
FVAR       0.15018   0.29880   0.36658
FE1   3    0.503507    0.449228    0.236927    11.00000    0.01289    0.01423 =
         0.01310   -0.00329   -0.00361   -0.00077
N1    5    0.610641    0.427277    0.316966    11.00000    0.01554    0.01706 =
         0.01509   -0.00286   -0.00399   -0.00019
N2    5    0.683470    0.470561    0.183397    11.00000    0.01681    0.01528 =
         0.01594   -0.00268   -0.00381   -0.00165
N3    5    0.459610    0.328594    0.201447    11.00000    0.01617    0.01521 =
         0.01536   -0.00297   -0.00591   -0.00072
N4    5    0.386132    0.570745    0.258410    11.00000    0.01543    0.01537 =
         0.01614   -0.00422   -0.00265   -0.00131
C1    1    0.564296    0.415808    0.385957    11.00000    0.01925    0.02058 =
         0.01713   -0.00281   -0.00306    0.00007
AFIX  43
H1    2    0.477738    0.405464    0.399865    11.00000   -1.20000
AFIX   0
C2    1    0.633837    0.418138    0.436828    11.00000    0.03017    0.02504 =
         0.01446   -0.00361   -0.00574    0.00016
AFIX  43
H2    2    0.596444    0.409480    0.484388    11.00000   -1.20000
AFIX   0
C3    1    0.762816    0.433771    0.416751    11.00000    0.02819    0.02627 =
         0.02222   -0.00491   -0.01366   -0.00188
AFIX  43
H3    2    0.814089    0.434944    0.450736    11.00000   -1.20000
AFIX   0
C4    1    0.812404    0.447156    0.347643    11.00000    0.01971    0.02023 =
         0.02344   -0.00383   -0.00879   -0.00188
AFIX  43
H4    2    0.898706    0.458318    0.333466    11.00000   -1.20000
AFIX   0
C5    1    0.736237    0.444536    0.296925    11.00000    0.01526    0.01487 =
         0.01924   -0.00314   -0.00549   -0.00008
C6    1    0.777914    0.461410    0.223625    11.00000    0.01569    0.01464 =
         0.01997   -0.00416   -0.00440   -0.00176
C7    1    0.904618    0.465457    0.191832    11.00000    0.01659    0.02561 =
         0.02611   -0.00503   -0.00439   -0.00337
AFIX  43
H7    2    0.968680    0.459734    0.219823    11.00000   -1.20000
AFIX   0
C8    1    0.935474    0.477543    0.121126    11.00000    0.01714    0.03161 =
         0.02729   -0.00640    0.00265   -0.00371
AFIX  43
H8    2    1.020546    0.480428    0.099625    11.00000   -1.20000
AFIX   0
C9    1    0.838503    0.485715    0.080339    11.00000    0.02577    0.02562 =
         0.01811   -0.00541    0.00126   -0.00455
AFIX  43
H9    2    0.857192    0.493864    0.031055    11.00000   -1.20000
AFIX   0
C10   1    0.717417    0.481597    0.113571    11.00000    0.02140    0.01790 =
         0.01662   -0.00383   -0.00373   -0.00306
AFIX  43
H10   2    0.653023    0.486819    0.085861    11.00000   -1.20000
AFIX   0
SI1   7    0.530819    0.211264    0.233836    11.00000    0.01698    0.01505 =
         0.01847   -0.00210   -0.00625   -0.00046
C11   1    0.484468    0.172282    0.330938    11.00000    0.02240    0.02252 =
         0.02144    0.00042   -0.00778   -0.00226
AFIX 137
H11A  2    0.526336    0.104274    0.347639    11.00000   -1.50000
H11B  2    0.393386    0.168690    0.341982    11.00000   -1.50000
H11C  2    0.509533    0.223572    0.353785    11.00000   -1.50000
AFIX   0
C12   1    0.706666    0.209117    0.217471    11.00000    0.02037    0.02158 =
         0.02954   -0.00223   -0.00612    0.00304
AFIX 137
H12A  2    0.742705    0.139795    0.236428    11.00000   -1.50000
H12B  2    0.733250    0.259781    0.240279    11.00000   -1.50000
H12C  2    0.735745    0.226655    0.167172    11.00000   -1.50000
AFIX   0
C13   1    0.495607    0.100747    0.195521    11.00000    0.03129    0.01898 =
         0.02989   -0.00569   -0.00789   -0.00267
AFIX 137
H13A  2    0.523380    0.034713    0.223793    11.00000   -1.50000
H13B  2    0.540051    0.106996    0.147673    11.00000   -1.50000
H13C  2    0.405157    0.103305    0.195257    11.00000   -1.50000
AFIX   0
SI2   7    0.382251    0.355206    0.131575    11.00000    0.01594    0.01940 =
         0.01313   -0.00257   -0.00522   -0.00194
C21   1    0.478397    0.317802    0.050872    11.00000    0.02487    0.02889 =
         0.01713   -0.00571   -0.00280   -0.00593
AFIX 137
H21A  2    0.430414    0.338384    0.011938    11.00000   -1.50000
H21B  2    0.498573    0.242660    0.059394    11.00000   -1.50000
H21C  2    0.556191    0.352916    0.039325    11.00000   -1.50000
AFIX   0
C22   1    0.231006    0.290279    0.147168    11.00000    0.01952    0.03613 =
         0.02065   -0.00558   -0.00636   -0.00603
AFIX 137
H22A  2    0.181900    0.321063    0.109757    11.00000   -1.50000
H22B  2    0.182703    0.300004    0.192079    11.00000   -1.50000
H22C  2    0.249952    0.216087    0.147759    11.00000   -1.50000
AFIX   0
C23   1    0.335661    0.497074    0.105832    11.00000    0.03128    0.02473 =
         0.01890   -0.00179   -0.01083    0.00390
AFIX 137
H23A  2    0.298301    0.509950    0.062956    11.00000   -1.50000
H23B  2    0.409943    0.536141    0.097847    11.00000   -1.50000
H23C  2    0.274392    0.519269    0.143240    11.00000   -1.50000
AFIX   0
SI3   7    0.450305    0.685536    0.248249    11.00000    0.01894    0.01524 =
         0.02121   -0.00483   -0.00202   -0.00302
C31   1    0.538990    0.692147    0.320608    11.00000    0.03295    0.02473 =
         0.04799   -0.00964   -0.01904   -0.00535
AFIX 137
H31A  2    0.567260    0.761749    0.313580    11.00000   -1.50000
H31B  2    0.611847    0.641233    0.320335    11.00000   -1.50000
H31C  2    0.483970    0.676894    0.365528    11.00000   -1.50000
AFIX   0
C32   1    0.561150    0.717636    0.164566    11.00000    0.03771    0.02046 =
         0.04213   -0.00580    0.01438   -0.00826
AFIX 137
H32A  2    0.582015    0.789540    0.157279    11.00000   -1.50000
H32B  2    0.521447    0.708914    0.125696    11.00000   -1.50000
H32C  2    0.637916    0.671231    0.166993    11.00000   -1.50000
AFIX   0
C33   1    0.329994    0.800353    0.245555    11.00000    0.02946    0.01724 =
         0.02494   -0.00635   -0.00446   -0.00195
AFIX 137
H33A  2    0.372340    0.863907    0.239161    11.00000   -1.50000
H33B  2    0.271429    0.791954    0.289448    11.00000   -1.50000
H33C  2    0.283763    0.804797    0.206658    11.00000   -1.50000
AFIX   0
SI4   7    0.242381    0.547559    0.305712    11.00000    0.01517    0.01727 =
         0.01683   -0.00486   -0.00179   -0.00137
C41   1    0.223371    0.578112    0.395578    11.00000    0.02825    0.02849 =
         0.02147   -0.00885   -0.00005   -0.00235
AFIX 137
H41A  2    0.140236    0.561023    0.420877    11.00000   -1.50000
H41B  2    0.232002    0.652012    0.391535    11.00000   -1.50000
H41C  2    0.287999    0.537172    0.421007    11.00000   -1.50000
AFIX   0
C42   1    0.210430    0.407460    0.321321    11.00000    0.02126    0.02177 =
         0.02483   -0.00551    0.00197   -0.00459
AFIX 137
H42A  2    0.129603    0.396776    0.351498    11.00000   -1.50000
H42B  2    0.277088    0.364359    0.343938    11.00000   -1.50000
H42C  2    0.207936    0.388184    0.276667    11.00000   -1.50000
AFIX   0
C43   1    0.108463    0.623653    0.263379    11.00000    0.01886    0.02655 =
         0.03332   -0.00518   -0.00698   -0.00094
AFIX 137
H43A  2    0.028773    0.606290    0.293031    11.00000   -1.50000
H43B  2    0.109963    0.606241    0.217721    11.00000   -1.50000
H43C  2    0.117137    0.697925    0.257410    11.00000   -1.50000
AFIX   0

K1    4    0.000000    0.000000    0.500000    10.50000    0.01836    0.01965 =
         0.01960    0.00009   -0.00217    0.00171
O1C   6   -0.187492    0.886625   -0.020953    11.00000    0.01850    0.02510 =
         0.03304   -0.00227   -0.00401   -0.00648
C2C   1   -0.175845    0.779741    0.010901    11.00000    0.03195    0.02463 =
         0.02961   -0.00566   -0.00438   -0.01336
AFIX  23
H2CA  2   -0.232989    0.741164   -0.006100    11.00000   -1.20000
H2CB  2   -0.198325    0.771080    0.062158    11.00000   -1.20000
AFIX   0
C3C   1   -0.042518    0.739037   -0.007646    11.00000    0.03539    0.01974 =
         0.03323   -0.00851   -0.00835   -0.00626
AFIX  23
H3CA  2   -0.033601    0.663012    0.008838    11.00000   -1.20000
H3CB  2   -0.017234    0.754495   -0.058877    11.00000   -1.20000
AFIX   0
O4C   6    0.034745    0.787634    0.024794    11.00000    0.02642    0.01793 =
         0.03065   -0.00771   -0.00979    0.00066
C5C   1    0.161414    0.744316    0.017285    11.00000    0.03380    0.02365 =
         0.03976   -0.01109   -0.01476    0.01112
AFIX  23
H5CA  2    0.197654    0.753866   -0.032715    11.00000   -1.20000
H5CB  2    0.164967    0.669184    0.037464    11.00000   -1.20000
AFIX   0
C6C   1    0.234213    0.798138    0.054565    11.00000    0.02747    0.02619 =
         0.03249   -0.00528   -0.01289    0.00893
AFIX  23
H6CA  2    0.190893    0.797307    0.102779    11.00000   -1.20000
H6CB  2    0.318807    0.762073    0.056902    11.00000   -1.20000
AFIX   0
O7C   6    0.244348    0.902534    0.017471    11.00000    0.02210    0.02825 =
         0.02642   -0.00431   -0.00934    0.00103
C8C   1    0.314665    0.958046    0.049210    11.00000    0.01652    0.03890 =
         0.03522   -0.00653   -0.01108   -0.00100
AFIX  23
H8CA  2    0.402144    0.926874    0.047469    11.00000   -1.20000
H8CB  2    0.277577    0.954985    0.098689    11.00000   -1.20000
AFIX   0
C9C   1    0.312731    1.068332    0.010581    11.00000    0.01622    0.03912 =
         0.03858   -0.00632   -0.00541   -0.00850
AFIX  23
H9CA  2    0.368923    1.106863    0.028298    11.00000   -1.20000
H9CB  2    0.342157    1.071134   -0.039758    11.00000   -1.20000
AFIX   0
K2    4    0.000000    1.000000    0.000000    10.50000    0.01837    0.01534 =
         0.03610   -0.00081   -0.01145   -0.00230

O1K   6   -0.197107    0.146039    0.460076    11.00000    0.01898    0.02604 =
         0.02399   -0.00040   -0.00664    0.00027
C2K   1   -0.198221    0.170910    0.386784    11.00000    0.02400    0.02399 =
         0.02519    0.00114   -0.01069    0.00051
AFIX  23
H2KA  2   -0.257381    0.232232    0.374998    11.00000   -1.20000
H2KB  2   -0.225707    0.112122    0.371271    11.00000   -1.20000
AFIX   0
C3K   1   -0.068065    0.193270    0.350950    11.00000    0.02558    0.01993 =
         0.02482    0.00222   -0.00892    0.00055
AFIX  23
H3KA  2   -0.068426    0.219756    0.300437    11.00000   -1.20000
H3KB  2   -0.036943    0.246613    0.370355    11.00000   -1.20000
AFIX   0
O4K   6    0.011446    0.099796    0.361594    11.00000    0.02191    0.01820 =
         0.02163   -0.00011   -0.00350   -0.00101
C5K   1    0.135403    0.114362    0.326327    11.00000    0.02647    0.02645 =
         0.02339    0.00162    0.00271   -0.00284
AFIX  23
H5KA  2    0.171255    0.167616    0.343551    11.00000   -1.20000
H5KB  2    0.134380    0.138408    0.275663    11.00000   -1.20000
AFIX   0
C6K   1    0.213940    0.013633    0.339327    11.00000    0.02626    0.02598 =
         0.02080   -0.00484    0.00249   -0.00032
AFIX  23
H6KA  2    0.172539   -0.041609    0.327481    11.00000   -1.20000
H6KB  2    0.296874    0.019835    0.309555    11.00000   -1.20000
AFIX   0
O7K   6    0.229446   -0.012273    0.410891    11.00000    0.02297    0.01936 =
         0.02257   -0.00501   -0.00185    0.00350
C8K   1    0.308599   -0.105239    0.425743    11.00000    0.02390    0.02387 =
         0.03226   -0.00538    0.00011    0.00620
AFIX  23
H8KA  2    0.392777   -0.096731    0.397676    11.00000   -1.20000
H8KB  2    0.272782   -0.163324    0.413786    11.00000   -1.20000
AFIX   0
C9K   1    0.318528   -0.127812    0.501793    11.00000    0.01778    0.02971 =
         0.03505   -0.00236   -0.00429    0.00326
AFIX  23
H9KA  2    0.377406   -0.189543    0.512975    11.00000   -1.20000
H9KB  2    0.350399   -0.068311    0.514278    11.00000   -1.20000
AFIX   0

SAME 0.02 0.04 O1SA > C5SA
PART 1
O1S   6   -0.072354    0.984905    0.138984    21.00000    0.04956    0.09599 =
         0.06225   -0.03819   -0.02313    0.00572
C2S   1   -0.168330    0.919366    0.168177    21.00000    0.05866    0.10151 =
         0.06331   -0.05201   -0.01345   -0.00177
AFIX  23
H2SE  2   -0.153779    0.855278    0.149008    21.00000   -1.20000
H2SF  2   -0.250639    0.954383    0.158302    21.00000   -1.20000
AFIX   0
C3S   1   -0.164476    0.894146    0.247402    21.00000    0.04700    0.04341 =
         0.04580   -0.03922   -0.00142    0.00646
AFIX  23
H3SE  2   -0.235492    0.931062    0.273072    21.00000   -1.20000
H3SF  2   -0.164990    0.818794    0.266456    21.00000   -1.20000
AFIX   0
C4S   1   -0.038776    0.934560    0.249964    21.00000    0.04747    0.05969 =
         0.06734   -0.02956   -0.01539    0.00287
AFIX  23
H4SE  2   -0.045508    0.966596    0.291237    21.00000   -1.20000
H4SF  2    0.027598    0.876777    0.253317    21.00000   -1.20000
AFIX   0
C5S   1   -0.007488    1.011927    0.185559    21.00000    0.03638    0.05927 =
         0.05769   -0.02701   -0.00148    0.01166
AFIX  23
H5SE  2   -0.035519    1.082922    0.193007    21.00000   -1.20000
H5SF  2    0.083899    1.007875    0.168847    21.00000   -1.20000
AFIX   0
PART 0
PART 2
O1SA  6   -0.032222    0.948938    0.142845   -21.00000    0.05946    0.04986 =
         0.03564   -0.00902   -0.00827   -0.02165
C2SA  1   -0.124741    0.874894    0.172335   -21.00000    0.05251    0.05080 =
         0.04233   -0.01574   -0.01017   -0.02045
AFIX  23
H2SG  2   -0.086492    0.803512    0.172155   -21.00000   -1.20000
H2SH  2   -0.194664    0.887682    0.144755   -21.00000   -1.20000
AFIX   0
C3SA  1   -0.171559    0.888241    0.245126   -21.00000    0.05745    0.06155 =
         0.05730    0.00190   -0.01719   -0.02775
AFIX  23
H3SG  2   -0.196177    0.822061    0.275755   -21.00000   -1.20000
H3SH  2   -0.243867    0.940801    0.246908   -21.00000   -1.20000
AFIX   0
C4SA  1   -0.057598    0.924652    0.265497   -21.00000    0.03826    0.04561 =
         0.03656   -0.02036   -0.00880    0.00216
AFIX  23
H4SG  2   -0.082366    0.965286    0.302750   -21.00000   -1.20000
H4SH  2    0.002135    0.865577    0.281108   -21.00000   -1.20000
AFIX   0
C5SA  1   -0.003438    0.990646    0.198535   -21.00000    0.02972    0.04077 =
         0.04633   -0.02146   -0.00652   -0.00312
AFIX  23
H5SG  2   -0.040191    1.063009    0.195480   -21.00000   -1.20000
H5SH  2    0.088518    0.990082    0.195763   -21.00000   -1.20000
AFIX   0

SAME 0.02 0.04 O1SB > C5SB
PART 0
PART 1
O1S'  6    0.113328    0.163309    0.514068    31.00000    0.03050    0.03965 =
         0.07577   -0.03136   -0.00506   -0.00154
C2S'  1    0.237130    0.162549    0.532769    31.00000    0.02828    0.04007 =
         0.04139   -0.01489   -0.00861    0.00438
AFIX  23
H2SA  2    0.303084    0.139068    0.497135    31.00000   -1.20000
H2SB  2    0.243848    0.116423    0.578537    31.00000   -1.20000
AFIX   0
C3S'  1    0.248859    0.274680    0.535910    31.00000    0.06251    0.05544 =
         0.06263   -0.01153   -0.00988   -0.02668
AFIX  23
H3SA  2    0.308206    0.307366    0.495645    31.00000   -1.20000
H3SB  2    0.278922    0.278773    0.579466    31.00000   -1.20000
AFIX   0
C4S'  1    0.117025    0.328039    0.533773    31.00000    0.06255    0.04275 =
         0.06765   -0.02096    0.01100   -0.01660
AFIX  23
H4SA  2    0.087787    0.359067    0.575407    31.00000   -1.20000
H4SB  2    0.114894    0.383077    0.491430    31.00000   -1.20000
AFIX   0
C5S'  1    0.042660    0.248655    0.532866    31.00000    0.04433    0.03748 =
         0.09810   -0.03130   -0.03347    0.01027
AFIX  23
H5SA  2   -0.006478    0.227880    0.579751    31.00000   -1.20000
H5SB  2   -0.017205    0.275098    0.499571    31.00000   -1.20000
AFIX   0
PART 0
PART 2
O1SB  6    0.118163    0.151668    0.535294   -31.00000    0.04794    0.03300 =
         0.06349   -0.02094   -0.00327   -0.00916
C2SB  1    0.249984    0.166174    0.525050   -31.00000    0.04932    0.06978 =
         0.09869   -0.03363    0.01010   -0.01430
AFIX  23
H2SC  2    0.292337    0.146264    0.480992   -31.00000   -1.20000
H2SD  2    0.289482    0.123030    0.564050   -31.00000   -1.20000
AFIX   0
C3SB  1    0.260561    0.277678    0.522234   -31.00000    0.05348    0.05949 =
         0.04300   -0.00852    0.00048   -0.02575
AFIX  23
H3SC  2    0.273859    0.316560    0.473449   -31.00000   -1.20000
H3SD  2    0.330364    0.287396    0.545751   -31.00000   -1.20000
AFIX   0
C4SB  1    0.134329    0.312015    0.561027   -31.00000    0.06402    0.04210 =
         0.07205   -0.02704    0.00064   -0.01266
AFIX  23
H4SC  2    0.138594    0.305432    0.611177   -31.00000   -1.20000
H4SD  2    0.108567    0.384934    0.541342   -31.00000   -1.20000
AFIX   0
C5SB  1    0.045527    0.241892    0.551129   -31.00000    0.05451    0.03808 =
         0.05570   -0.01924    0.00310   -0.00287
AFIX  23
H5SC  2   -0.015579    0.223948    0.594136   -31.00000   -1.20000
H5SD  2   -0.001002    0.275416    0.512433   -31.00000   -1.20000
AFIX   0
HKLF 4

REM  Gw46_0m_a.res in P-1
REM R1 =  0.0280 for   10773 Fo > 4sig(Fo)  and  0.0384 for all   12642 data
REM    648 parameters refined using    560 restraints

END

WGHT      0.0266      1.2231

REM Highest difference peak  0.340,  deepest hole -0.260,  1-sigma level  0.045
Q1    1  -0.1482  0.7781  0.1969  11.00000  0.05    0.34
Q2    1   0.8398  0.4667  0.2087  11.00000  0.05    0.33
Q3    1   0.8800  0.4836  0.1037  11.00000  0.05    0.26
Q4    1   0.3620  0.4364  0.1157  11.00000  0.05    0.26
Q5    1   0.2988  0.3192  0.1412  11.00000  0.05    0.26
Q6    1   0.7577  0.4503  0.2618  11.00000  0.05    0.26
Q7    1   0.5134  0.6932  0.2055  11.00000  0.05    0.25
Q8    1   0.2235  0.4689  0.3141  11.00000  0.05    0.25
Q9    1   0.0564  1.0584  0.1874  11.00000  0.05    0.25
Q10   1   0.6762  0.4404  0.3070  11.00000  0.05    0.25
;
_shelx_res_checksum              51555
_shelx_hkl_file                  
;
  -2   0   0    0.34    0.11
  -2   0   0    0.40    0.10
  -2   0   0    0.10    0.13
  -2   0   0    0.36    0.08
   2   0   0    0.37    0.11
   2   0   0    0.34    0.10
   2   0   0    0.33    0.09
   2   0   0   -0.10    0.11
   2   0   0    0.29    0.11
  -3   0   0   95.16    1.56
  -3   0   0   95.73    1.61
  -3   0   0   94.60    1.63
  -3   0   0   94.39    1.64
  -3   0   0   95.38    1.68
   3   0   0   95.82    1.60
   3   0   0   95.69    1.62
   3   0   0   95.19    1.62
   3   0   0   94.24    1.63
   3   0   0   96.83    1.56
   3   0   0   95.78    1.68
  -4   0   0  547.46    8.67
  -4   0   0  547.85    8.73
  -4   0   0  557.15    8.70
  -4   0   0  564.27    8.61
  -4   0   0  549.53    8.78
   4   0   0  544.93    8.66
   4   0   0  551.74    8.69
   4   0   0  567.57    8.61
   4   0   0  545.32    8.69
   4   0   0  556.36    8.78
   4   0   0  545.92    8.70
  -5   0   0    9.50    0.48
  -5   0   0    9.13    0.39
  -5   0   0    9.01    0.43
  -5   0   0    9.49    0.44
   5   0   0    9.29    0.40
   5   0   0    9.15    0.47
   5   0   0    9.65    0.41
   5   0   0    9.06    0.40
   5   0   0    9.42    0.32
   5   0   0    9.54    0.37
  -6   0   0   53.18    1.11
  -6   0   0   53.24    1.16
  -6   0   0   52.50    1.24
  -6   0   0   53.77    1.01
  -6   0   0   55.40    1.21
   6   0   0   52.67    1.14
   6   0   0   53.73    1.00
   6   0   0   54.20    1.09
   6   0   0   55.43    1.25
   6   0   0   53.47    1.14
   6   0   0   51.63    1.13
  -7   0   0   34.03    0.95
  -7   0   0   31.87    0.72
  -7   0   0   33.24    0.85
  -7   0   0   32.81    0.91
  -7   0   0   31.61    0.98
   7   0   0   34.05    1.00
   7   0   0   31.85    0.87
   7   0   0   32.05    0.88
   7   0   0   32.12    0.80
   7   0   0   34.12    0.92
   7   0   0   32.85    0.71
  -8   0   0   49.77    1.36
  -8   0   0   50.11    1.26
  -8   0   0   49.81    1.01
  -8   0   0   52.53    1.32
  -8   0   0   50.15    1.17
   8   0   0   50.37    1.14
   8   0   0   50.68    1.24
   8   0   0   49.03    0.98
   8   0   0   50.14    1.20
   8   0   0   49.65    1.22
   8   0   0   52.78    1.38
  -9   0   0    2.20    0.40
  -9   0   0    2.41    0.40
  -9   0   0    2.90    0.51
  -9   0   0    2.05    0.45
  -9   0   0    2.80    0.28
   9   0   0    2.08    0.25
   9   0   0    2.67    0.44
   9   0   0    2.60    0.45
   9   0   0    2.68    0.39
   9   0   0    2.68    0.57
   9   0   0    2.35    0.35
 -10   0   0   11.43    0.74
 -10   0   0   11.65    0.87
 -10   0   0   12.46    0.98
  10   0   0   10.68    0.91
  10   0   0   11.70    0.85
  10   0   0    9.60    0.71
  10   0   0   10.31    0.99
  10   0   0   12.44    0.68
 -11   0   0    2.65    0.64
 -11   0   0    2.81    0.69
 -11   0   0    2.79    0.48
  11   0   0    2.33    0.70
  11   0   0    2.33    0.44
  11   0   0    3.54    0.72
  11   0   0    2.23    0.48
  11   0   0    2.62    0.65
  11   0   0    2.87    0.60
 -12   0   0    1.95    0.58
 -12   0   0    2.48    0.72
 -12   0   0    2.64    0.73
  12   0   0    1.41    0.84
  12   0   0    1.85    1.21
  12   0   0    2.37    0.56
  12   0   0    3.12    0.58
 -13   0   0   14.06    1.46
 -13   0   0   16.49    1.17
  13   0   0   15.31    1.12
  13   0   0   15.05    1.05
  13  -1   0    1.77    0.69
  13  -1   0    2.02    0.57
 -13   1   0    2.87    0.92
 -13   1   0    3.17    0.68
  12  -1   0   -0.85    0.49
  12  -1   0   -0.68    0.69
  12  -1   0    0.06    0.45
  12  -1   0   -0.68    0.73
 -12   1   0   -1.19    0.66
 -12   1   0   -0.21    0.50
  11  -1   0    9.78    1.09
  11  -1   0   10.74    0.74
  11  -1   0   10.50    0.86
  11  -1   0    9.50    1.15
  11  -1   0   10.89    1.08
  11  -1   0    9.23    0.91
 -11   1   0   11.40    1.27
 -11   1   0   11.00    0.80
 -11   1   0    6.72    0.86
 -11   1   0    9.68    1.06
  10  -1   0    1.55    0.34
  10  -1   0    2.30    0.55
  10  -1   0    1.22    0.57
  10  -1   0    1.76    0.52
  10  -1   0    1.80    0.43
  10  -1   0    2.16    0.52
 -10   1   0    2.27    0.62
 -10   1   0    1.69    0.43
   9  -1   0   43.22    1.08
   9  -1   0   42.94    1.22
   9  -1   0   43.84    1.18
   9  -1   0   42.76    1.18
   9  -1   0   43.57    1.36
  -9   1   0   45.06    1.35
  -9   1   0   43.55    1.12
  -9   1   0   44.28    1.33
   8  -1   0    0.86    0.33
   8  -1   0    0.36    0.37
   8  -1   0    0.34    0.24
   8  -1   0    0.88    0.29
   8  -1   0    1.02    0.31
  -8   1   0    0.83    0.30
  -8   1   0    1.25    0.38
  -8   1   0    0.87    0.34
   7  -1   0   26.36    0.77
   7  -1   0   26.87    0.79
   7  -1   0   26.67    0.71
   7  -1   0   27.03    0.90
   7  -1   0   25.95    0.79
  -7   1   0   26.74    0.74
  -7   1   0   26.50    0.90
  -7   1   0   26.40    0.86
   6  -1   0   74.44    1.49
   6  -1   0   75.97    1.58
   6  -1   0   72.23    1.44
   6  -1   0   76.45    1.46
   6  -1   0   74.82    1.28
   6  -1   0   75.27    1.40
  -6   1   0   75.25    1.58
  -6   1   0   73.69    1.54
  -6   1   0   73.94    1.42
   5  -1   0    7.26    0.35
   5  -1   0    6.66    0.36
   5  -1   0    7.48    0.33
   5  -1   0    7.28    0.25
   5  -1   0    6.58    0.43
   5  -1   0    6.46    0.37
  -5   1   0    7.34    0.44
  -5   1   0    6.85    0.26
  -5   1   0    7.07    0.42
  -5   1   0    7.10    0.34
   4  -1   0    8.78    0.37
   4  -1   0    8.95    0.33
   4  -1   0    8.58    0.25
   4  -1   0    8.95    0.34
   4  -1   0    9.13    0.40
   4  -1   0    9.40    0.31
  -4   1   0    8.82    0.26
  -4   1   0    8.93    0.32
  -4   1   0    8.37    0.40
  -4   1   0    8.71    0.39
   3  -1   0  281.89    4.36
   3  -1   0  276.61    4.42
   3  -1   0  278.80    4.49
   3  -1   0  284.31    4.51
   3  -1   0  276.49    4.43
   3  -1   0  278.69    4.43
  -3   1   0  279.06    4.36
  -3   1   0  278.67    4.50
  -3   1   0  283.19    4.52
  -3   1   0  279.05    4.42
   2  -1   0   72.15    1.16
   2  -1   0   72.13    1.26
   2  -1   0   72.36    1.20
   2  -1   0   71.90    1.20
  -2   1   0   72.88    1.26
  -2   1   0   71.74    1.19
  -2   1   0   72.34    1.16
  -1   1   0  406.89    6.77
  -1   1   0  392.56    6.81
  -1  -1   0  733.48   13.47
   1   1   0  785.42   12.79
  -2  -1   0   26.46    0.54
  -2  -1   0   25.95    0.53
  -2  -1   0   27.20    0.52
  -2  -1   0   26.50    0.54
  -2  -1   0   26.69    0.52
  -2  -1   0   26.23    0.58
   2   1   0   27.24    0.58
   2   1   0   27.33    0.54
   2   1   0   26.33    0.54
   2   1   0   26.58    0.52
   2   1   0   26.20    0.53
  -3  -1   0   37.22    0.80
  -3  -1   0   37.39    0.73
  -3  -1   0   37.51    0.74
  -3  -1   0   37.13    0.74
  -3  -1   0   34.26    0.79
   3   1   0   37.39    0.72
   3   1   0   38.54    0.73
   3   1   0   37.60    0.75
   3   1   0   37.58    0.72
   3   1   0   37.15    0.74
  -4  -1   0   55.93    1.02
  -4  -1   0   53.49    1.06
  -4  -1   0   55.77    1.05
  -4  -1   0   55.02    1.07
  -4  -1   0   55.97    1.04
  -4  -1   0   53.25    1.12
   4   1   0   55.06    1.02
   4   1   0   53.73    1.06
   4   1   0   53.64    1.04
   4   1   0   54.25    1.06
  -5  -1   0  125.70    2.19
  -5  -1   0  122.94    2.18
  -5  -1   0  123.03    2.26
  -5  -1   0  121.54    2.14
  -5  -1   0  124.94    2.10
   5   1   0  123.20    2.17
   5   1   0  121.92    2.12
   5   1   0  121.05    2.16
   5   1   0  122.41    2.14
   5   1   0  124.24    2.09
  -6  -1   0   24.21    0.68
  -6  -1   0   25.50    0.63
  -6  -1   0   24.70    0.79
  -6  -1   0   25.59    0.73
  -6  -1   0   24.90    0.74
   6   1   0   24.48    0.65
   6   1   0   21.78    0.82
   6   1   0   26.14    0.72
   6   1   0   25.79    0.62
   6   1   0   25.71    0.68
  -7  -1   0  117.13    2.03
  -7  -1   0  115.34    2.30
  -7  -1   0  116.16    2.19
  -7  -1   0  115.83    2.21
  -7  -1   0  115.36    2.13
   7   1   0  117.03    2.29
   7   1   0  110.63    2.19
   7   1   0  114.92    2.09
   7   1   0  113.74    2.13
   7   1   0  114.97    2.17
   7   1   0  114.26    2.01
  -8  -1   0   52.17    1.30
  -8  -1   0   54.13    1.42
  -8  -1   0   54.45    1.24
  -8  -1   0   55.71    1.35
  -8  -1   0   53.50    1.12
   8   1   0   53.30    1.30
   8   1   0   52.48    1.29
   8   1   0   53.63    1.20
   8   1   0   51.95    1.23
   8   1   0   53.42    1.41
   8   1   0   52.95    1.09
  -9  -1   0   27.99    0.78
  -9  -1   0   27.03    1.02
  -9  -1   0   27.68    0.92
  -9  -1   0   27.23    1.09
  -9  -1   0   28.36    1.06
   9   1   0   27.32    0.99
   9   1   0   25.86    1.10
   9   1   0   26.30    1.01
   9   1   0   27.36    0.87
   9   1   0   28.77    0.89
   9   1   0   27.40    0.73
 -10  -1   0    3.64    0.63
 -10  -1   0    3.27    0.37
 -10  -1   0    1.36    0.52
 -10  -1   0    2.99    0.69
 -10  -1   0    2.67    0.43
  10   1   0    2.66    0.48
  10   1   0    2.29    0.40
  10   1   0    2.56    0.59
  10   1   0    2.25    0.48
  10   1   0    2.68    0.51
 -11  -1   0    2.15    0.63
 -11  -1   0    3.01    0.51
 -11  -1   0    2.03    0.71
 -11  -1   0    3.64    0.37
 -11  -1   0    2.85    0.58
  11   1   0    2.84    0.59
  11   1   0    2.22    0.46
  11   1   0    3.58    0.50
  11   1   0    2.06    0.75
  11   1   0    1.94    0.65
 -12  -1   0    0.81    0.68
 -12  -1   0   -0.41    0.51
  12   1   0   -0.28    0.59
  12   1   0   -0.16    0.67
  12   1   0   -1.28    0.64
  12   1   0    0.19    0.43
  12   1   0   -0.07    0.50
 -13  -1   0    2.66    0.86
 -13  -1   0    2.83    0.71
  13   1   0    4.31    0.82
  13   1   0    4.12    0.65
  13   1   0    3.57    0.72
  13  -2   0    0.74    0.64
  13  -2   0    0.80    0.55
 -13   2   0    1.73    0.86
 -13   2   0    0.91    0.63
  12  -2   0   65.03    1.63
  12  -2   0   60.36    1.80
  12  -2   0   63.70    2.10
  12  -2   0   66.92    1.82
 -12   2   0   65.22    2.01
 -12   2   0   65.40    1.67
 -12   2   0   63.59    2.07
  11  -2   0   23.11    0.91
  11  -2   0   21.95    1.07
  11  -2   0   20.30    1.16
  11  -2   0   20.87    1.27
  11  -2   0   23.41    1.08
  11  -2   0   21.46    1.34
 -11   2   0   22.43    1.21
 -11   2   0   24.10    0.99
 -11   2   0   23.56    1.29
  10  -2   0   57.73    1.71
  10  -2   0   58.88    1.54
  10  -2   0   59.85    1.49
  10  -2   0   63.14    1.60
  10  -2   0   58.82    1.64
  10  -2   0   53.80    1.88
 -10   2   0   61.84    1.63
 -10   2   0   61.06    1.43
 -10   2   0   60.97    1.74
   9  -2   0    2.05    0.49
   9  -2   0    2.14    0.43
   9  -2   0    2.70    0.40
   9  -2   0    2.30    0.35
   9  -2   0    2.54    0.41
   9  -2   0    2.34    0.43
  -9   2   0    2.56    0.50
  -9   2   0    2.40    0.44
  -9   2   0    2.28    0.38
  -9   2   0    3.80    0.56
   8  -2   0   78.77    1.70
   8  -2   0   78.72    1.80
   8  -2   0   79.09    1.56
   8  -2   0   81.25    1.67
   8  -2   0   77.18    1.62
  -8   2   0   77.86    1.79
  -8   2   0   78.48    1.81
  -8   2   0   80.49    1.59
   7  -2   0   21.14    0.82
   7  -2   0   21.78    0.69
   7  -2   0   21.46    0.63
   7  -2   0   21.77    0.70
   7  -2   0   22.02    0.74
  -7   2   0   22.44    0.83
  -7   2   0   20.56    0.65
  -7   2   0   21.33    0.82
   6  -2   0    6.21    0.40
   6  -2   0    6.53    0.35
   6  -2   0    6.32    0.44
   6  -2   0    7.09    0.49
   6  -2   0    6.82    0.39
  -6   2   0    7.28    0.52
  -6   2   0    6.65    0.36
  -6   2   0    6.70    0.48
   5  -2   0    2.53    0.25
   5  -2   0    1.43    0.26
   5  -2   0    2.13    0.22
   5  -2   0    1.87    0.23
   5  -2   0    1.82    0.25
  -5   2   0    2.37    0.29
  -5   2   0    2.40    0.31
  -5   2   0    2.28    0.21
  -5   2   0    1.83    0.22
   4  -2   0   19.59    0.58
   4  -2   0   19.31    0.57
   4  -2   0   19.62    0.48
   4  -2   0   19.24    0.49
   4  -2   0   19.88    0.41
   4  -2   0   19.52    0.46
  -4   2   0   19.41    0.47
  -4   2   0   19.06    0.58
  -4   2   0   19.42    0.58
   3  -2   0  192.85    3.10
   3  -2   0  190.10    3.19
   3  -2   0  193.86    3.09
   3  -2   0  192.03    3.06
   3  -2   0  194.77    3.19
  -3   2   0  194.06    3.19
  -3   2   0  195.96    3.20
  -3   2   0  191.59    3.08
   2  -2   0   14.16    0.32
   2  -2   0   13.84    0.32
   2  -2   0   14.56    0.39
   2  -2   0   14.63    0.41
   2  -2   0   14.32    0.31
  -2   2   0   14.13    0.33
  -2   2   0   14.32    0.39
  -2   2   0   14.38    0.31
   1  -2   0  137.82    2.14
   1  -2   0  138.00    2.14
   1  -2   0  138.49    2.19
   1  -2   0  136.94    2.19
  -1   2   0  136.89    2.13
  -1   2   0  139.36    2.19
  -1   2   0  126.50    2.15
   0  -2   0  156.66    2.48
   0  -2   0  152.91    2.45
   0  -2   0  155.52    2.41
   0  -2   0  153.43    2.40
   0  -2   0  151.98    2.40
   0  -2   0  155.15    2.44
   0   2   0  152.19    2.44
   0   2   0  155.24    2.48
   0   2   0  153.29    2.45
   0   2   0  152.76    2.40
   0   2   0  152.89    2.41
   0   2   0  152.87    2.40
  -1  -2   0    1.78    0.17
  -1  -2   0    1.67    0.15
  -1  -2   0    1.64    0.13
  -1  -2   0    2.19    0.17
  -1  -2   0    1.52    0.13
   1   2   0    1.33    0.20
   1   2   0    2.01    0.17
   1   2   0    1.81    0.20
   1   2   0    1.77    0.14
  -2  -2   0  238.21    3.84
  -2  -2   0  242.45    3.87
  -2  -2   0  242.26    3.86
  -2  -2   0  252.47    3.91
  -2  -2   0  237.73    3.84
  -2  -2   0  245.10    3.90
   2   2   0  248.14    3.90
   2   2   0  246.79    3.90
   2   2   0  232.69    3.94
   2   2   0  241.93    3.84
   2   2   0  246.92    3.86
   2   2   0  240.22    3.84
  -3  -2   0   21.44    0.49
  -3  -2   0   21.76    0.53
  -3  -2   0   21.33    0.50
  -3  -2   0   22.47    0.56
  -3  -2   0   20.48    0.58
   3   2   0   21.35    0.54
   3   2   0   22.09    0.49
   3   2   0   21.93    0.54
   3   2   0   22.32    0.57
   3   2   0   20.99    0.52
  -4  -2   0   82.83    1.50
  -4  -2   0   80.75    1.57
  -4  -2   0   84.35    1.49
  -4  -2   0   83.42    1.48
  -4  -2   0   81.94    1.52
  -4  -2   0   83.94    1.51
   4   2   0   82.51    1.57
   4   2   0   82.25    1.46
   4   2   0   81.81    1.47
   4   2   0   83.36    1.50
   4   2   0   81.77    1.52
  -5  -2   0   10.54    0.44
  -5  -2   0   10.48    0.43
  -5  -2   0    9.65    0.46
  -5  -2   0   10.10    0.43
  -5  -2   0   10.04    0.49
  -5  -2   0    9.54    0.43
   5   2   0   10.56    0.41
   5   2   0    9.90    0.38
   5   2   0   10.35    0.44
   5   2   0   10.07    0.46
   5   2   0    9.56    0.42
   5   2   0   11.00    0.51
  -6  -2   0   33.98    0.88
  -6  -2   0   33.08    0.84
  -6  -2   0   32.97    0.82
  -6  -2   0   31.37    0.79
  -6  -2   0   33.98    0.83
   6   2   0   33.50    0.93
   6   2   0   32.88    0.85
   6   2   0   32.66    0.78
   6   2   0   32.50    0.79
   6   2   0   32.70    0.79
   6   2   0   32.26    0.84
  -7  -2   0    0.49    0.31
  -7  -2   0    0.47    0.30
  -7  -2   0    0.07    0.26
  -7  -2   0    0.38    0.23
  -7  -2   0    0.33    0.23
   7   2   0    0.24    0.26
   7   2   0    0.28    0.21
   7   2   0    0.25    0.30
   7   2   0    0.23    0.20
   7   2   0    0.21    0.26
   7   2   0    0.58    0.22
  -8  -2   0   43.18    1.17
  -8  -2   0   42.95    1.02
  -8  -2   0   40.22    1.13
  -8  -2   0   41.63    1.08
  -8  -2   0   41.37    1.23
   8   2   0   40.65    1.03
   8   2   0   42.83    1.03
   8   2   0   43.03    1.13
   8   2   0   41.80    1.24
   8   2   0   42.10    0.98
   8   2   0   39.11    1.28
  -9  -2   0    0.27    0.41
  -9  -2   0    0.54    0.37
  -9  -2   0    0.07    0.38
  -9  -2   0    0.40    0.35
  -9  -2   0    0.33    0.32
   9   2   0    0.56    0.30
   9   2   0   -0.13    0.40
   9   2   0    0.43    0.43
   9   2   0    0.07    0.32
   9   2   0    0.32    0.38
   9   2   0    0.29    0.29
 -10  -2   0   27.72    1.01
 -10  -2   0   28.86    1.23
 -10  -2   0   29.51    1.19
 -10  -2   0   27.84    0.89
 -10  -2   0   30.02    1.14
  10   2   0   26.90    0.95
  10   2   0   26.35    0.83
  10   2   0   30.19    1.11
  10   2   0   25.81    1.11
  10   2   0   26.52    1.24
  10   2   0   28.10    1.15
 -11  -2   0    1.30    0.54
 -11  -2   0    1.62    0.63
 -11  -2   0    1.12    0.54
 -11  -2   0    2.26    0.66
 -11  -2   0    1.88    0.40
  11   2   0    1.72    0.70
  11   2   0    2.24    0.47
  11   2   0    1.89    0.64
  11   2   0    1.86    0.52
  11   2   0    1.58    0.43
 -12  -2   0   20.78    1.35
 -12  -2   0   22.08    1.40
 -12  -2   0   22.31    0.86
 -12  -2   0   22.64    1.14
  12   2   0   21.46    1.48
  12   2   0   21.53    1.04
  12   2   0   19.28    1.05
  12   2   0   21.50    1.31
  12   2   0   22.28    1.53
 -13  -2   0    0.57    0.65
 -13  -2   0    0.58    0.80
  13   2   0    0.23    0.61
  13   2   0    0.46    0.55
  13   2   0   -2.01    0.72
  13  -3   0    5.89    0.87
  13  -3   0    5.23    0.67
 -13   3   0    6.02    1.04
 -13   3   0    5.40    0.67
  12  -3   0    1.66    0.85
  12  -3   0    1.55    0.47
  12  -3   0    2.20    0.59
  12  -3   0    1.59    0.71
 -12   3   0    3.10    0.75
 -12   3   0    1.00    0.52
 -12   3   0    2.55    0.76
  11  -3   0   42.67    1.40
  11  -3   0   36.95    1.55
  11  -3   0   39.49    1.53
  11  -3   0   39.84    1.16
  11  -3   0   40.23    1.32
 -11   3   0   41.43    1.23
 -11   3   0   40.44    1.55
 -11   3   0   39.81    1.43
  10  -3   0    3.90    0.65
  10  -3   0    4.50    0.57
  10  -3   0    3.70    0.41
  10  -3   0    4.62    0.53
  10  -3   0    3.87    0.52
  10  -3   0    4.63    0.65
 -10   3   0    4.33    0.75
 -10   3   0    3.80    0.72
 -10   3   0    4.52    0.86
 -10   3   0    4.65    0.49
   9  -3   0   29.14    1.02
   9  -3   0   27.22    1.05
   9  -3   0   28.51    0.98
   9  -3   0   30.49    0.94
   9  -3   0   28.65    0.84
   9  -3   0   29.75    1.13
  -9   3   0   29.06    1.14
  -9   3   0   27.65    1.17
  -9   3   0   28.50    0.87
   8  -3   0    5.97    0.67
   8  -3   0    5.83    0.54
   8  -3   0    6.85    0.59
   8  -3   0    5.91    0.53
   8  -3   0    5.63    0.45
   8  -3   0    5.10    0.47
  -8   3   0    6.55    0.67
  -8   3   0    5.81    0.72
  -8   3   0    5.85    0.46
  -8   3   0    5.84    0.70
   7  -3   0  173.55    2.98
   7  -3   0  172.66    3.09
   7  -3   0  171.75    2.94
   7  -3   0  171.02    3.14
   7  -3   0  168.60    2.90
  -7   3   0  155.04    3.21
  -7   3   0  174.21    3.16
  -7   3   0  171.22    2.91
  -7   3   0  172.47    3.14
   6  -3   0   16.99    0.55
   6  -3   0   17.42    0.54
   6  -3   0   16.21    0.49
   6  -3   0   15.86    0.66
   6  -3   0   16.82    0.64
  -6   3   0   16.46    0.67
  -6   3   0   17.51    0.51
  -6   3   0   17.32    0.67
  -6   3   0   14.56    0.82
   5  -3   0   22.63    0.70
   5  -3   0   23.01    0.55
   5  -3   0   23.75    0.70
   5  -3   0   22.89    0.59
   5  -3   0   24.22    0.59
   5  -3   0   22.27    0.50
  -5   3   0   22.90    0.71
  -5   3   0   22.45    0.55
  -5   3   0   22.71    0.71
   4  -3   0    0.20    0.13
   4  -3   0    0.25    0.19
   4  -3   0   -0.21    0.18
   4  -3   0   -0.16    0.12
   4  -3   0    0.21    0.12
  -4   3   0   -0.03    0.18
  -4   3   0   -0.04    0.11
   3  -3   0  161.08    2.58
   3  -3   0  162.40    2.69
   3  -3   0  159.43    2.71
   3  -3   0  158.74    2.57
   3  -3   0  160.53    2.58
  -3   3   0  164.28    2.69
  -3   3   0  158.73    2.55
  -3   3   0  151.37    2.61
   2  -3   0  408.73    6.52
   2  -3   0  417.50    6.45
   2  -3   0  420.13    6.54
  -2   3   0  417.99    6.54
  -2   3   0  407.93    6.45
   1  -3   0  146.00    2.38
   1  -3   0  143.92    2.40
   1  -3   0  145.03    2.27
   1  -3   0  143.59    2.34
   0  -3   0  191.85    3.04
   0  -3   0  197.63    3.10
   0  -3   0  194.32    3.05
   0  -3   0  194.91    3.05
   0  -3   0  195.30    3.12
   0  -3   0  198.37    3.16
   0   3   0  192.76    3.13
   0   3   0  192.87    3.05
   0   3   0  194.60    3.11
   0   3   0  193.76    3.05
   0   3   0  198.31    3.17
   0   3   0  190.82    3.05
  -1  -3   0  143.88    2.37
  -1  -3   0  137.44    2.31
  -1  -3   0  138.99    2.27
  -1  -3   0  140.45    2.25
  -1  -3   0  139.71    2.27
  -1  -3   0  144.57    2.28
   1   3   0  136.09    2.26
   1   3   0  140.15    2.28
   1   3   0  141.06    2.27
   1   3   0  143.34    2.36
   1   3   0  143.06    2.30
  -2  -3   0   66.91    1.19
  -2  -3   0   66.55    1.17
  -2  -3   0   68.72    1.26
  -2  -3   0   70.57    1.22
  -2  -3   0   67.83    1.15
  -2  -3   0   66.44    1.16
   2   3   0   67.79    1.21
   2   3   0   67.34    1.18
   2   3   0   67.99    1.19
   2   3   0   56.02    1.13
   2   3   0   66.73    1.24
   2   3   0   67.27    1.16
  -3  -3   0    9.50    0.35
  -3  -3   0    9.11    0.36
  -3  -3   0    9.32    0.40
  -3  -3   0    8.16    0.29
  -3  -3   0    8.82    0.32
   3   3   0    9.04    0.30
   3   3   0    8.91    0.31
   3   3   0    9.05    0.36
   3   3   0    8.94    0.35
   3   3   0    8.34    0.38
   3   3   0    9.14    0.37
  -4  -3   0    7.38    0.38
  -4  -3   0    7.71    0.33
  -4  -3   0    7.58    0.41
  -4  -3   0    7.36    0.34
  -4  -3   0    7.65    0.37
   4   3   0    7.62    0.37
   4   3   0    7.54    0.39
   4   3   0    7.23    0.40
   4   3   0    7.00    0.31
   4   3   0    7.82    0.34
  -5  -3   0  218.85    3.59
  -5  -3   0  216.95    3.63
  -5  -3   0  217.03    3.64
  -5  -3   0  216.85    3.59
  -5  -3   0  211.29    3.70
  -5  -3   0  212.73    3.59
   5   3   0  209.96    3.55
   5   3   0  211.10    3.56
   5   3   0  219.19    3.70
   5   3   0  216.87    3.61
   5   3   0  216.12    3.61
   5   3   0  216.68    3.63
  -6  -3   0    0.33    0.22
  -6  -3   0    0.57    0.24
  -6  -3   0    0.47    0.21
  -6  -3   0    0.43    0.21
  -6  -3   0    0.50    0.23
  -6  -3   0    0.71    0.22
   6   3   0    0.68    0.23
   6   3   0    0.84    0.28
   6   3   0    0.22    0.24
   6   3   0    0.66    0.18
   6   3   0    0.34    0.23
   6   3   0    0.66    0.19
  -7  -3   0    0.57    0.25
  -7  -3   0    0.13    0.30
  -7  -3   0    0.15    0.26
  -7  -3   0    0.22    0.25
  -7  -3   0    0.29    0.26
  -7  -3   0    0.26    0.26
   7   3   0    0.22    0.20
   7   3   0    0.32    0.28
   7   3   0    0.28    0.25
   7   3   0   -0.03    0.21
   7   3   0    0.53    0.27
   7   3   0    0.19    0.33
  -8  -3   0    0.86    0.34
  -8  -3   0    0.27    0.29
  -8  -3   0    0.01    0.32
  -8  -3   0    0.05    0.28
  -8  -3   0    0.67    0.33
   8   3   0    0.43    0.34
   8   3   0    0.12    0.24
   8   3   0    0.91    0.39
   8   3   0    0.28    0.23
   8   3   0    0.69    0.29
   8   3   0    0.88    0.32
  -9  -3   0   35.24    1.17
  -9  -3   0   34.27    1.22
  -9  -3   0   36.58    1.08
  -9  -3   0   34.95    1.02
  -9  -3   0   34.29    1.16
   9   3   0   36.79    1.13
   9   3   0   35.15    1.01
   9   3   0   35.20    1.25
   9   3   0   35.53    0.98
   9   3   0   37.14    1.17
   9   3   0   36.49    1.00
 -10  -3   0    0.49    0.45
 -10  -3   0    0.47    0.40
 -10  -3   0    0.24    0.50
 -10  -3   0   -0.18    0.46
 -10  -3   0    0.51    0.39
  10   3   0   -0.19    0.51
  10   3   0    0.01    0.46
  10   3   0    0.43    0.37
  10   3   0    0.22    0.55
  10   3   0    0.38    0.35
  10   3   0   -0.33    0.33
 -11  -3   0    7.74    0.78
 -11  -3   0    7.03    0.84
 -11  -3   0    8.51    1.04
 -11  -3   0    6.62    0.79
 -11  -3   0    8.63    0.75
  11   3   0    9.60    0.77
  11   3   0    8.41    0.98
  11   3   0    8.67    0.85
  11   3   0    7.84    0.74
 -12  -3   0   14.55    0.88
 -12  -3   0   12.99    1.29
 -12  -3   0   14.38    1.10
 -12  -3   0   11.47    1.31
  12   3   0   13.78    1.01
  12   3   0   16.05    0.97
  12   3   0   17.03    1.46
  12   3   0   15.70    1.25
  12   3   0   15.79    1.53
 -13  -3   0   30.28    1.76
 -13  -3   0   32.05    1.24
 -13  -3   0   36.34    1.52
  13   3   0   34.31    1.43
  13   3   0   30.35    1.31
  13   3   0   32.38    1.64
  13  -4   0   10.54    0.98
  13  -4   0   12.19    1.30
 -13   4   0    9.40    1.16
 -13   4   0   10.03    1.02
  12  -4   0    0.99    0.70
  12  -4   0    0.00    0.40
  12  -4   0    0.57    0.61
  12  -4   0    1.08    0.79
 -12   4   0    0.19    0.65
 -12   4   0   -0.10    0.74
 -12   4   0    0.04    0.47
  11  -4   0    4.48    0.78
  11  -4   0    4.61    0.78
  11  -4   0    4.69    0.64
  11  -4   0    4.41    0.59
  11  -4   0    4.83    0.51
 -11   4   0    4.51    0.51
 -11   4   0    3.73    0.61
 -11   4   0    4.87    0.77
  10  -4   0    8.48    0.76
  10  -4   0    7.04    0.82
  10  -4   0    9.10    0.89
  10  -4   0    8.05    0.80
  10  -4   0    7.99    0.82
  10  -4   0    8.88    0.60
 -10   4   0    8.53    0.64
 -10   4   0    7.58    0.93
 -10   4   0    7.37    0.82
   9  -4   0   21.52    1.04
   9  -4   0   19.51    0.89
   9  -4   0   21.59    0.83
   9  -4   0   22.89    0.89
  -9   4   0   22.22    1.01
  -9   4   0   21.76    0.90
   8  -4   0    1.27    0.45
   8  -4   0    1.60    0.34
   8  -4   0    1.17    0.30
   8  -4   0    1.34    0.40
   8  -4   0    1.42    0.29
   8  -4   0    1.55    0.37
  -8   4   0    1.85    0.43
  -8   4   0    1.24    0.29
  -8   4   0    1.36    0.36
   7  -4   0    2.22    0.25
   7  -4   0    2.66    0.39
   7  -4   0    2.63    0.30
   7  -4   0    3.06    0.46
   7  -4   0    2.49    0.36
   7  -4   0    2.28    0.31
  -7   4   0    2.28    0.35
  -7   4   0    2.85    0.42
  -7   4   0    2.71    0.29
   6  -4   0   56.06    1.03
   6  -4   0   56.14    1.30
   6  -4   0   56.83    1.32
   6  -4   0   56.33    1.16
   6  -4   0   56.93    1.13
   6  -4   0   55.44    1.20
   6  -4   0   56.32    1.10
  -6   4   0   56.60    1.10
  -6   4   0   55.39    1.30
  -6   4   0   56.61    1.18
   5  -4   0   31.27    0.86
   5  -4   0   32.29    0.69
   5  -4   0   32.36    0.86
   5  -4   0   32.59    0.74
   5  -4   0   33.19    0.77
   5  -4   0   31.99    0.66
   5  -4   0   32.29    0.70
  -5   4   0   31.50    0.74
  -5   4   0   32.34    0.68
  -5   4   0   31.56    0.85
   4  -4   0  164.01    2.70
   4  -4   0  165.01    2.70
   4  -4   0  166.21    2.85
   4  -4   0  165.70    2.68
   4  -4   0  161.89    2.72
   4  -4   0  164.03    2.87
   4  -4   0  162.40    2.70
  -4   4   0  168.63    2.84
  -4   4   0  165.09    2.71
  -4   4   0  160.80    2.66
   3  -4   0   74.07    1.37
   3  -4   0   71.95    1.25
   3  -4   0   73.18    1.25
   3  -4   0   72.66    1.30
   3  -4   0   73.25    1.23
   3  -4   0   71.50    1.30
   3  -4   0   73.49    1.42
  -3   4   0   72.31    1.21
  -3   4   0   71.85    1.25
  -3   4   0   73.30    1.37
   2  -4   0    7.87    0.23
   2  -4   0    8.29    0.38
   2  -4   0    8.09    0.24
   2  -4   0    7.78    0.33
   2  -4   0    8.19    0.33
   2  -4   0    8.03    0.22
   1  -4   0  907.16   14.84
  -1   4   0  878.02   14.55
   0  -4   0   64.01    1.06
   0  -4   0   63.92    1.21
   0  -4   0   63.64    1.13
   0  -4   0   64.38    1.07
   0  -4   0   63.32    1.15
   0  -4   0   61.85    1.05
   0   4   0   63.35    1.06
   0   4   0   62.01    1.13
   0   4   0   65.26    1.21
   0   4   0   63.49    1.06
   0   4   0   63.44    1.07
   0   4   0   63.94    1.17
  -1  -4   0  226.44    3.65
  -1  -4   0  229.23    3.61
  -1  -4   0  231.99    3.67
  -1  -4   0  227.98    3.63
  -1  -4   0  230.78    3.64
  -1  -4   0  229.83    3.77
   1   4   0  226.88    3.63
   1   4   0  222.42    3.61
   1   4   0  229.19    3.67
   1   4   0  226.21    3.67
   1   4   0  229.72    3.76
   1   4   0  226.70    3.63
  -2  -4   0   64.35    1.13
  -2  -4   0   64.40    1.27
  -2  -4   0   65.58    1.19
  -2  -4   0   62.47    1.16
  -2  -4   0   61.95    1.12
  -2  -4   0   62.92    1.15
   2   4   0   62.51    1.16
   2   4   0   63.17    1.18
   2   4   0   63.29    1.25
   2   4   0   64.01    1.14
  -3  -4   0   26.49    0.64
  -3  -4   0   26.04    0.62
  -3  -4   0   26.19    0.59
  -3  -4   0   25.95    0.60
  -3  -4   0   25.96    0.67
  -3  -4   0   26.77    0.72
   3   4   0   26.26    0.64
   3   4   0   26.10    0.63
   3   4   0   26.08    0.59
   3   4   0   25.72    0.65
   3   4   0   26.86    0.70
   3   4   0   25.63    0.58
  -4  -4   0  196.95    3.40
  -4  -4   0  202.61    3.33
  -4  -4   0  200.96    3.31
  -4  -4   0  201.84    3.35
  -4  -4   0  200.30    3.29
  -4  -4   0  206.36    3.43
   4   4   0  203.50    3.39
   4   4   0  178.01    3.55
   4   4   0  198.95    3.34
   4   4   0  196.52    3.27
   4   4   0  203.25    3.39
   4   4   0  201.62    3.33
  -5  -4   0   70.72    1.39
  -5  -4   0   69.65    1.37
  -5  -4   0   68.73    1.42
  -5  -4   0   67.73    1.47
  -5  -4   0   69.80    1.36
  -5  -4   0   72.67    1.47
   5   4   0   71.71    1.35
   5   4   0   70.17    1.41
   5   4   0   73.97    1.48
   5   4   0   69.65    1.33
   5   4   0   69.45    1.40
   5   4   0   69.55    1.42
  -6  -4   0    4.49    0.42
  -6  -4   0    4.89    0.42
  -6  -4   0    4.31    0.47
  -6  -4   0    3.99    0.47
  -6  -4   0    3.87    0.46
  -6  -4   0    4.34    0.42
   6   4   0    4.20    0.38
   6   4   0    4.06    0.44
   6   4   0    4.96    0.35
   6   4   0    4.70    0.44
   6   4   0    3.91    0.44
  -7  -4   0    0.46    0.27
  -7  -4   0    0.60    0.28
  -7  -4   0   -0.12    0.25
  -7  -4   0    0.01    0.28
  -7  -4   0   -0.06    0.23
  -7  -4   0    0.11    0.26
   7   4   0    0.35    0.33
   7   4   0    0.05    0.28
   7   4   0    0.20    0.24
   7   4   0    0.29    0.26
   7   4   0    0.40    0.28
   7   4   0    0.03    0.21
  -8  -4   0    2.60    0.41
  -8  -4   0    2.25    0.39
  -8  -4   0    2.31    0.47
  -8  -4   0    2.63    0.44
  -8  -4   0    2.53    0.38
   8   4   0    2.81    0.37
   8   4   0    2.68    0.35
   8   4   0    2.06    0.38
   8   4   0    1.59    0.40
   8   4   0    1.97    0.42
   8   4   0    2.68    0.39
  -9  -4   0    2.72    0.52
  -9  -4   0    3.14    0.47
  -9  -4   0    3.07    0.50
  -9  -4   0    3.95    0.54
  -9  -4   0    3.81    0.45
   9   4   0    3.33    0.56
   9   4   0    3.78    0.50
   9   4   0    3.74    0.44
   9   4   0    3.55    0.45
   9   4   0    3.25    0.41
   9   4   0    2.82    0.47
 -10  -4   0    1.63    0.55
 -10  -4   0    0.89    0.43
 -10  -4   0    0.79    0.44
 -10  -4   0    0.98    0.51
 -10  -4   0    1.61    0.45
  10   4   0    1.01    0.44
  10   4   0    0.81    0.42
  10   4   0    0.25    0.52
  10   4   0    0.70    0.38
  10   4   0    0.70    0.47
  10   4   0    1.29    0.49
 -11  -4   0    5.65    0.75
 -11  -4   0    7.96    0.88
 -11  -4   0    7.48    0.83
 -11  -4   0    5.95    0.78
 -11  -4   0    6.38    0.82
  11   4   0    6.53    0.80
  11   4   0    6.60    0.78
  11   4   0    5.44    0.68
  11   4   0    6.97    0.74
 -12  -4   0   43.41    1.79
 -12  -4   0   43.05    1.38
 -12  -4   0   43.80    1.75
 -12  -4   0   47.19    1.55
  12   4   0   43.70    1.65
  12   4   0   42.82    1.71
  12   4   0   45.96    1.83
  12   4   0   46.46    1.39
 -13  -4   0    0.59    0.60
 -13  -4   0    0.16    0.70
 -13  -4   0    0.31    0.87
  13   4   0    0.02    0.63
  13   4   0   -0.61    0.84
  13   4   0    0.62    0.59
  12  -5   0   10.39    0.82
  12  -5   0    9.68    1.12
 -12   5   0    9.74    1.06
 -12   5   0   10.89    0.84
 -12   5   0   10.71    1.07
  11  -5   0    2.05    1.08
  11  -5   0   -0.15    0.56
  11  -5   0    0.17    0.52
  11  -5   0    0.06    0.55
  11  -5   0    0.15    0.37
 -11   5   0    0.12    0.38
 -11   5   0    0.36    0.65
 -11   5   0    0.96    0.55
  10  -5   0   36.81    1.13
  10  -5   0   38.75    1.34
  10  -5   0   37.71    1.30
  10  -5   0   38.91    1.05
  10  -5   0   39.87    1.47
  10  -5   0   39.93    1.47
 -10   5   0   38.80    1.43
 -10   5   0   36.59    1.22
 -10   5   0   39.94    1.08
   9  -5   0   10.91    0.81
   9  -5   0   12.11    0.90
   9  -5   0   11.96    0.79
   9  -5   0   10.89    0.67
   9  -5   0   11.43    0.80
   9  -5   0   10.99    0.59
  -9   5   0   12.63    0.77
  -9   5   0   12.29    0.61
  -9   5   0   11.61    0.88
   8  -5   0   29.58    1.03
   8  -5   0   30.10    0.95
   8  -5   0   30.42    0.80
   8  -5   0   30.63    1.08
   8  -5   0   30.29    0.91
   8  -5   0   28.94    0.84
  -8   5   0   29.37    1.06
  -8   5   0   28.24    0.92
  -8   5   0   28.77    0.78
   7  -5   0    9.80    0.48
   7  -5   0    9.34    0.43
   7  -5   0   10.15    0.68
   7  -5   0    9.62    0.56
   7  -5   0    9.28    0.63
   7  -5   0    9.52    0.53
  -7   5   0   10.04    0.56
  -7   5   0    9.98    0.68
  -7   5   0    9.58    0.44
   6  -5   0   -0.14    0.16
   6  -5   0    0.21    0.28
   6  -5   0    0.28    0.28
   6  -5   0    0.05    0.18
   6  -5   0    0.10    0.21
   6  -5   0    0.18    0.18
   6  -5   0    0.19    0.17
   6  -5   0    0.28    0.22
  -6   5   0    0.10    0.28
  -6   5   0   -0.21    0.22
  -6   5   0    0.27    0.17
   5  -5   0   34.01    0.90
   5  -5   0   32.66    0.73
   5  -5   0   34.25    0.71
   5  -5   0   32.88    0.77
   5  -5   0   33.41    0.92
   5  -5   0   33.78    0.75
   5  -5   0   32.37    0.74
  -5   5   0   33.50    0.90
  -5   5   0   33.39    0.76
  -5   5   0   33.57    0.69
   4  -5   0   44.91    1.05
   4  -5   0   43.88    1.00
   4  -5   0   44.04    0.87
   4  -5   0   43.93    0.85
   4  -5   0   43.29    0.91
   4  -5   0   44.49    0.82
   4  -5   0   44.66    0.91
  -4   5   0   44.35    1.00
  -4   5   0   44.10    0.80
  -4   5   0   43.65    0.85
   3  -5   0   21.99    0.49
   3  -5   0   21.35    0.68
   3  -5   0   22.08    0.59
   3  -5   0   21.83    0.47
   3  -5   0   22.02    0.45
   3  -5   0   22.22    0.61
  -3   5   0   21.98    0.61
   2  -5   0   38.68    0.90
   2  -5   0   39.38    0.83
   2  -5   0   39.85    0.86
   1  -5   0   86.53    1.38
   1  -5   0   85.33    1.57
   1  -5   0   83.86    1.55
   1  -5   0   85.32    1.39
   1  -5   0   83.10    1.50
   1  -5   0   85.38    1.39
  -1   5   0   83.99    1.37
  -1   5   0   83.76    1.39
  -1   5   0   86.44    1.59
   0  -5   0    0.48    0.11
   0  -5   0    0.47    0.16
   0  -5   0    0.32    0.10
   0  -5   0    0.58    0.19
   0  -5   0    0.33    0.15
   0   5   0    0.41    0.11
   0   5   0    0.36    0.09
   0   5   0    0.18    0.16
   0   5   0    0.42    0.16
   0   5   0    0.40    0.11
   0   5   0    0.37    0.15
  -1  -5   0  379.60    6.15
  -1  -5   0  379.10    5.94
  -1  -5   0  379.64    6.01
  -1  -5   0  382.65    5.97
  -1  -5   0  378.78    6.00
  -1  -5   0  378.30    5.96
   1   5   0  380.57    6.03
   1   5   0  379.93    6.13
   1   5   0  378.05    5.97
   1   5   0  377.65    5.96
   1   5   0  381.28    5.94
   1   5   0  368.89    6.02
  -2  -5   0    0.32    0.12
  -2  -5   0    0.39    0.15
  -2  -5   0    0.32    0.16
  -2  -5   0    0.68    0.23
  -2  -5   0    0.47    0.13
  -2  -5   0    0.38    0.14
   2   5   0    0.44    0.14
   2   5   0    0.44    0.17
   2   5   0    0.35    0.21
   2   5   0    0.39    0.14
   2   5   0    0.53    0.15
  -3  -5   0   42.04    0.90
  -3  -5   0   41.96    0.84
  -3  -5   0   43.46    1.02
  -3  -5   0   40.17    0.85
  -3  -5   0   41.05    0.87
  -3  -5   0   40.92    0.92
   3   5   0   42.31    0.85
   3   5   0   39.87    0.91
   3   5   0   40.29    0.98
   3   5   0   40.02    0.89
   3   5   0   41.06    0.88
  -4  -5   0   -0.03    0.18
  -4  -5   0    0.29    0.19
  -4  -5   0    0.18    0.24
  -4  -5   0    0.13    0.23
  -4  -5   0    0.28    0.16
  -4  -5   0    0.07    0.16
   4   5   0    0.05    0.16
   4   5   0    0.24    0.19
   4   5   0    0.46    0.24
   4   5   0    0.39    0.19
   4   5   0    0.15    0.16
   4   5   0    0.11    0.19
  -5  -5   0   50.84    1.22
  -5  -5   0   51.65    1.15
  -5  -5   0   50.63    1.09
  -5  -5   0   50.38    1.10
  -5  -5   0   51.20    1.07
  -5  -5   0   49.10    1.18
   5   5   0   52.01    1.18
   5   5   0   49.86    1.07
   5   5   0   50.15    1.12
   5   5   0   50.55    1.13
   5   5   0   49.54    1.18
   5   5   0   50.42    1.04
  -6  -5   0    1.68    0.33
  -6  -5   0    1.46    0.28
  -6  -5   0    1.68    0.36
  -6  -5   0    1.00    0.28
  -6  -5   0    1.33    0.34
  -6  -5   0    0.98    0.26
   6   5   0    1.11    0.32
   6   5   0    0.92    0.29
   6   5   0    1.15    0.28
   6   5   0    1.29    0.23
   6   5   0    1.01    0.28
   6   5   0    1.34    0.25
  -7  -5   0   71.25    1.54
  -7  -5   0   71.67    1.55
  -7  -5   0   73.15    1.68
  -7  -5   0   72.41    1.55
  -7  -5   0   71.96    1.63
   7   5   0   71.23    1.46
   7   5   0   71.67    1.59
   7   5   0   71.86    1.50
   7   5   0   72.84    1.59
   7   5   0   72.64    1.67
   7   5   0   73.57    1.60
  -8  -5   0    9.96    0.74
  -8  -5   0   10.53    0.68
  -8  -5   0   10.78    0.76
  -8  -5   0    9.99    0.64
  -8  -5   0   11.01    0.70
  -8  -5   0    9.31    0.73
   8   5   0   10.51    0.56
   8   5   0    9.98    0.74
   8   5   0   10.20    0.62
   8   5   0   11.44    0.72
   8   5   0   10.14    0.76
  -9  -5   0   27.76    1.10
  -9  -5   0   27.11    1.05
  -9  -5   0   27.04    1.15
  -9  -5   0   27.96    1.05
  -9  -5   0   27.72    1.01
   9   5   0   25.49    1.14
   9   5   0   28.22    0.97
   9   5   0   27.84    0.89
   9   5   0   28.79    1.06
   9   5   0   26.67    1.72
   9   5   0   27.77    1.01
 -10  -5   0    0.55    0.52
 -10  -5   0    1.33    0.47
 -10  -5   0    1.34    0.51
 -10  -5   0    0.45    0.50
 -10  -5   0    1.06    0.56
  10   5   0    1.19    0.42
  10   5   0    1.15    0.60
  10   5   0    0.44    0.48
  10   5   0    1.84    0.66
  10   5   0    1.57    0.38
  10   5   0    1.15    0.55
 -11  -5   0    5.45    0.69
 -11  -5   0    5.17    0.77
 -11  -5   0    5.11    1.11
 -11  -5   0    5.49    0.67
 -11  -5   0    7.00    1.28
  11   5   0    6.09    0.63
  11   5   0    6.85    0.90
  11   5   0    5.70    0.57
  11   5   0    5.32    0.71
 -12  -5   0   12.80    1.30
 -12  -5   0   10.85    1.08
 -12  -5   0    9.51    1.01
 -12  -5   0   12.56    1.12
  12   5   0   13.80    1.54
  12   5   0   10.29    0.93
  12   5   0   10.80    0.99
  12   5   0   10.73    1.27
 -13  -5   0   13.84    1.34
 -13  -5   0   12.92    1.59
 -13  -5   0   12.72    1.22
  13   5   0   10.82    1.42
  13   5   0   12.53    1.21
  13   5   0   10.87    1.08
  13   5   0   10.80    1.09
  12  -6   0    1.84    0.73
  12  -6   0    0.94    0.44
 -12   6   0    1.04    0.52
 -12   6   0    1.49    0.88
  11  -6   0    7.67    0.83
  11  -6   0    7.33    0.69
  11  -6   0    8.53    0.93
  11  -6   0    8.34    0.86
 -11   6   0    8.89    0.71
 -11   6   0    9.64    1.00
 -11   6   0    8.83    0.98
  10  -6   0   -0.86    0.44
  10  -6   0    0.26    0.62
  10  -6   0   -0.66    0.30
  10  -6   0    0.85    0.42
  10  -6   0   -0.25    0.48
 -10   6   0   -0.01    0.46
 -10   6   0   -0.23    0.53
 -10   6   0   -0.30    0.33
   9  -6   0   14.51    0.97
   9  -6   0   12.58    0.80
   9  -6   0   13.79    0.90
   9  -6   0   13.35    0.69
   9  -6   0   11.77    0.84
   9  -6   0   13.15    0.62
  -9   6   0   14.88    0.94
  -9   6   0   15.19    0.78
  -9   6   0   13.31    0.61
   8  -6   0    0.33    0.28
   8  -6   0    0.31    0.33
   8  -6   0    0.12    0.38
   8  -6   0   -0.22    0.40
   8  -6   0   -0.46    0.31
   8  -6   0   -0.21    0.28
  -8   6   0   -0.55    0.38
  -8   6   0    0.62    0.32
  -8   6   0    0.14    0.24
   7  -6   0    0.51    0.24
   7  -6   0    0.81    0.37
   7  -6   0    1.35    0.26
   7  -6   0    1.61    0.32
   7  -6   0    0.98    0.29
   7  -6   0    0.74    0.22
   7  -6   0    0.85    0.22
   7  -6   0    0.56    0.34
  -7   6   0    0.67    0.36
  -7   6   0    0.98    0.30
  -7   6   0    0.79    0.23
   6  -6   0   26.03    0.63
   6  -6   0   25.06    0.69
   6  -6   0   25.41    0.72
   6  -6   0   24.59    0.89
   6  -6   0   24.11    0.66
   6  -6   0   23.54    0.67
  -6   6   0   25.13    0.60
  -6   6   0   25.70    0.86
  -6   6   0   25.25    0.69
   5  -6   0    1.11    0.31
   5  -6   0    1.63    0.22
   5  -6   0    1.27    0.25
   5  -6   0    1.28    0.22
   5  -6   0    1.51    0.31
   5  -6   0    1.43    0.24
   5  -6   0    1.62    0.20
  -5   6   0    1.28    0.21
  -5   6   0    1.32    0.17
  -5   6   0    1.79    0.31
   4  -6   0    0.17    0.12
   4  -6   0    0.20    0.18
   4  -6   0    0.13    0.23
   4  -6   0    0.34    0.15
   4  -6   0    0.12    0.19
   4  -6   0   -0.01    0.15
   4  -6   0    0.13    0.21
   4  -6   0    0.34    0.29
  -4   6   0   -0.20    0.20
   3  -6   0    8.29    0.42
   3  -6   0    8.59    0.41
   3  -6   0    8.06    0.50
   3  -6   0    8.08    0.30
   2  -6   0    0.17    0.11
   2  -6   0    0.05    0.18
   2  -6   0    0.29    0.20
   2  -6   0    0.10    0.20
   1  -6   0   46.61    0.82
   1  -6   0   45.85    0.95
   1  -6   0   46.70    1.05
   1  -6   0   47.27    0.82
   1  -6   0   46.88    1.01
   1  -6   0   46.52    0.83
  -1   6   0   46.30    0.83
  -1   6   0   46.67    0.81
  -1   6   0   47.49    1.06
   0  -6   0    3.41    0.21
   0  -6   0    3.66    0.23
   0  -6   0    3.44    0.30
   0  -6   0    3.40    0.39
   0  -6   0    3.88    0.21
   0  -6   0    3.80    0.29
   0   6   0    3.79    0.23
   0   6   0    3.55    0.22
   0   6   0    4.08    0.35
   0   6   0    3.58    0.22
  -1  -6   0    9.83    0.32
  -1  -6   0    9.42    0.37
  -1  -6   0    9.66    0.34
  -1  -6   0    8.86    0.37
  -1  -6   0    9.56    0.50
  -1  -6   0    9.41    0.35
   1   6   0    9.48    0.41
   1   6   0    9.58    0.41
   1   6   0    9.33    0.34
   1   6   0    9.82    0.32
   1   6   0    9.73    0.35
   1   6   0    9.18    0.48
  -2  -6   0   44.68    0.90
  -2  -6   0   43.44    0.87
  -2  -6   0   43.07    1.08
  -2  -6   0   44.65    0.91
  -2  -6   0   45.36    0.90
  -2  -6   0   45.12    0.95
   2   6   0   44.37    1.06
   2   6   0   44.96    0.93
   2   6   0   44.07    0.90
   2   6   0   43.98    0.91
   2   6   0   45.09    0.96
   2   6   0   43.09    0.86
  -3  -6   0   22.15    0.61
  -3  -6   0   21.95    0.57
  -3  -6   0   21.57    0.56
  -3  -6   0   21.74    0.75
  -3  -6   0   21.68    0.59
  -3  -6   0   21.85    0.65
   3   6   0   20.99    0.58
   3   6   0   22.34    0.73
   3   6   0   22.33    0.62
   3   6   0   21.40    0.63
  -4  -6   0    0.01    0.18
  -4  -6   0   -0.14    0.18
  -4  -6   0    0.09    0.25
  -4  -6   0    0.14    0.22
  -4  -6   0    0.07    0.17
  -4  -6   0    0.11    0.17
   4   6   0    0.16    0.16
   4   6   0   -0.22    0.18
   4   6   0   -0.07    0.16
   4   6   0   -0.05    0.25
   4   6   0    0.20    0.21
   4   6   0    0.18    0.19
  -5  -6   0    0.42    0.22
  -5  -6   0    0.44    0.24
  -5  -6   0    0.01    0.24
  -5  -6   0    0.27    0.18
  -5  -6   0   -0.04    0.27
  -5  -6   0    0.20    0.31
   5   6   0    0.35    0.19
   5   6   0    0.51    0.30
   5   6   0    0.36    0.25
   5   6   0    0.11    0.25
   5   6   0   -0.19    0.22
  -6  -6   0    9.66    0.63
  -6  -6   0   10.71    0.55
  -6  -6   0    9.74    0.56
  -6  -6   0   10.19    0.62
  -6  -6   0    9.58    0.67
  -6  -6   0   10.05    0.54
   6   6   0   10.58    0.49
   6   6   0    9.52    0.60
   6   6   0    9.59    0.58
   6   6   0    9.69    0.52
   6   6   0   10.44    0.62
  -7  -6   0   48.13    1.17
  -7  -6   0   48.96    1.27
  -7  -6   0   47.66    1.32
  -7  -6   0   46.47    1.18
  -7  -6   0   46.72    1.31
  -7  -6   0   47.25    1.19
   7   6   0   46.95    1.09
   7   6   0   48.07    1.29
   7   6   0   47.37    1.14
   7   6   0   46.05    1.21
   7   6   0   46.03    1.27
   7   6   0   47.43    1.24
  -8  -6   0    0.16    0.41
  -8  -6   0    0.78    0.36
  -8  -6   0    0.42    0.44
  -8  -6   0    0.29    0.41
  -8  -6   0    0.26    0.36
  -8  -6   0    0.03    0.31
   8   6   0    0.59    0.43
   8   6   0    0.00    0.37
   8   6   0    0.18    0.33
   8   6   0    0.78    0.29
   8   6   0    0.25    0.39
   8   6   0    0.87    0.39
  -9  -6   0   37.35    1.42
  -9  -6   0   36.96    1.23
  -9  -6   0   37.74    1.18
  -9  -6   0   38.47    1.36
  -9  -6   0   38.00    1.23
  -9  -6   0   37.64    1.29
   9   6   0   36.00    1.22
   9   6   0   36.18    1.32
   9   6   0   39.81    1.31
   9   6   0   38.77    1.13
   9   6   0   37.98    1.26
   9   6   0   37.87    1.07
 -10  -6   0    2.87    0.69
 -10  -6   0    2.61    0.71
 -10  -6   0    1.56    0.56
 -10  -6   0    2.82    0.66
 -10  -6   0    2.60    0.56
  10   6   0    2.14    0.60
  10   6   0    2.88    0.45
  10   6   0    3.49    0.74
  10   6   0    2.76    0.48
  10   6   0    1.93    0.56
  10   6   0    2.59    0.68
 -11  -6   0   26.42    1.26
 -11  -6   0   25.97    1.45
 -11  -6   0   26.92    1.44
 -11  -6   0   27.38    1.25
  11   6   0   24.45    1.42
  11   6   0   28.14    1.36
  11   6   0   27.58    1.16
  11   6   0   26.81    1.08
 -12  -6   0    0.96    0.68
 -12  -6   0   -0.06    0.73
 -12  -6   0    1.13    0.88
  12   6   0    0.88    0.85
  12   6   0   -1.04    0.71
  12   6   0   -0.48    0.51
  12   6   0    0.06    0.49
 -13  -6   0    3.09    0.84
 -13  -6   0    3.42    1.04
 -13  -6   0    6.66    0.90
  13   6   0    2.66    0.98
  13   6   0    3.49    0.69
  13   6   0    5.07    1.24
  13   6   0    3.83    0.83
  12  -7   0    8.70    0.84
  12  -7   0    7.35    0.99
 -12   7   0    8.57    1.03
 -12   7   0    8.07    0.83
  11  -7   0    0.54    0.40
  11  -7   0   -0.43    0.61
  11  -7   0    0.43    0.52
  11  -7   0   -0.50    0.63
 -11   7   0    0.05    0.41
 -11   7   0    0.46    0.75
 -11   7   0   -0.26    0.56
  10  -7   0    6.29    0.67
  10  -7   0    6.43    0.84
  10  -7   0    6.28    0.72
  10  -7   0    6.24    0.70
  10  -7   0    6.78    0.59
 -10   7   0    7.19    0.66
 -10   7   0    7.14    0.59
 -10   7   0    6.66    0.81
   9  -7   0   11.25    0.65
   9  -7   0    9.45    0.79
   9  -7   0   10.63    0.97
   9  -7   0    9.71    0.59
   9  -7   0   10.72    0.81
   9  -7   0   12.30    0.99
  -9   7   0   11.82    0.94
  -9   7   0   11.57    0.75
  -9   7   0   10.42    0.58
   8  -7   0   29.37    0.77
   8  -7   0   29.81    0.76
   8  -7   0   29.25    0.96
   8  -7   0   30.38    0.84
   8  -7   0   30.24    0.94
   8  -7   0   30.58    1.15
   8  -7   0   31.17    0.80
   8  -7   0   33.30    1.17
  -8   7   0   30.91    0.76
  -8   7   0   30.12    1.11
  -8   7   0   30.80    0.90
   7  -7   0    5.69    0.39
   7  -7   0    5.18    0.50
   7  -7   0    5.20    0.46
   7  -7   0    4.65    0.52
   7  -7   0    5.29    0.43
   7  -7   0    4.40    0.48
   7  -7   0    5.66    0.57
   7  -7   0    5.91    0.53
  -7   7   0    5.82    0.50
  -7   7   0    4.81    0.37
  -7   7   0    4.89    0.54
   6  -7   0    0.94    0.25
   6  -7   0    0.96    0.27
   6  -7   0    1.31    0.28
   6  -7   0    0.58    0.35
   6  -7   0    1.09    0.20
   6  -7   0    0.94    0.26
   6  -7   0    1.08    0.34
  -6   7   0    0.56    0.33
  -6   7   0    1.08    0.19
  -6   7   0    1.17    0.24
   5  -7   0    2.41    0.31
   5  -7   0    1.76    0.36
   5  -7   0    2.15    0.23
   5  -7   0    1.71    0.29
   5  -7   0    2.32    0.35
   5  -7   0    2.15    0.26
   5  -7   0    2.41    0.26
   5  -7   0    2.53    0.46
   4  -7   0   66.97    1.37
   4  -7   0   65.09    1.35
   4  -7   0   65.22    1.21
   4  -7   0   65.13    1.48
   4  -7   0   66.66    1.51
   4  -7   0   66.62    1.39
   3  -7   0   11.05    0.35
   3  -7   0   10.84    0.49
   3  -7   0   10.52    0.51
   3  -7   0   10.91    0.60
   2  -7   0   13.25    0.34
   2  -7   0   12.99    0.56
   2  -7   0   13.34    0.49
   2  -7   0   13.11    0.49
   2  -7   0   13.42    0.57
   1  -7   0   49.20    1.11
   1  -7   0   52.60    1.20
   1  -7   0   52.98    0.94
   1  -7   0   52.77    0.92
   1  -7   0   51.45    1.07
   1  -7   0   52.04    0.92
  -1   7   0   51.21    1.18
  -1   7   0   51.87    0.93
  -1   7   0   52.62    0.90
   0  -7   0   57.13    1.15
   0  -7   0   55.31    1.28
   0  -7   0   56.13    1.02
   0  -7   0   55.12    1.00
   0  -7   0   56.17    1.12
   0  -7   0   56.73    1.03
   0   7   0   55.93    1.03
   0   7   0   55.68    0.99
   0   7   0   56.04    1.22
   0   7   0   55.65    1.01
  -1  -7   0   76.20    1.62
  -1  -7   0   75.32    1.42
  -1  -7   0   76.35    1.36
  -1  -7   0   77.22    1.44
  -1  -7   0   77.63    1.38
   1   7   0   76.17    1.46
   1   7   0   75.54    1.49
   1   7   0   76.70    1.34
   1   7   0   76.77    1.59
   1   7   0   75.07    1.37
   1   7   0   75.26    1.36
  -2  -7   0    7.61    0.37
  -2  -7   0    7.50    0.37
  -2  -7   0    7.43    0.33
  -2  -7   0    7.85    0.40
  -2  -7   0    7.96    0.37
  -2  -7   0    7.37    0.52
   2   7   0    7.84    0.38
   2   7   0    7.53    0.38
   2   7   0    7.56    0.52
   2   7   0    7.22    0.40
   2   7   0    7.65    0.43
   2   7   0    7.61    0.34
  -3  -7   0   73.78    1.64
  -3  -7   0   73.64    1.42
  -3  -7   0   74.73    1.40
  -3  -7   0   75.01    1.40
  -3  -7   0   75.28    1.45
  -3  -7   0   74.50    1.49
   3   7   0   73.11    1.44
   3   7   0   74.01    1.39
   3   7   0   73.31    1.44
   3   7   0   74.77    1.50
   3   7   0   75.46    1.62
  -4  -7   0   36.13    0.88
  -4  -7   0   36.55    0.85
  -4  -7   0   36.98    0.85
  -4  -7   0   37.31    1.08
  -4  -7   0   37.91    0.93
  -4  -7   0   36.96    0.96
   4   7   0   36.76    0.92
   4   7   0   31.05    1.16
   4   7   0   36.35    0.90
   4   7   0   36.12    0.86
   4   7   0   37.36    0.96
  -5  -7   0   77.00    1.63
  -5  -7   0   79.12    1.51
  -5  -7   0   72.26    1.72
  -5  -7   0   76.04    1.51
  -5  -7   0   78.30    1.75
  -5  -7   0   69.10    1.66
   5   7   0   76.82    1.70
   5   7   0   77.27    1.50
   5   7   0   75.22    1.49
   5   7   0   74.97    1.57
   5   7   0   75.93    1.56
  -6  -7   0    2.61    0.39
  -6  -7   0    4.20    0.46
  -6  -7   0    3.63    0.48
  -6  -7   0    3.40    0.36
  -6  -7   0    3.32    0.36
  -6  -7   0    3.76    0.46
   6   7   0    3.41    0.38
   6   7   0    3.47    0.45
   6   7   0    2.68    0.36
   6   7   0    4.16    0.44
   6   7   0    3.60    0.48
   6   7   0    3.10    0.34
  -7  -7   0    2.31    0.42
  -7  -7   0    1.87    0.41
  -7  -7   0    2.30    0.38
  -7  -7   0    3.48    0.50
  -7  -7   0    3.00    0.50
  -7  -7   0    2.43    0.39
   7   7   0    2.85    0.44
   7   7   0    2.84    0.47
   7   7   0    2.40    0.32
   7   7   0    2.75    0.45
   7   7   0    3.17    0.48
   7   7   0    2.72    0.35
  -8  -7   0   23.72    1.04
  -8  -7   0   24.67    1.08
  -8  -7   0   23.66    0.92
  -8  -7   0   22.37    0.91
  -8  -7   0   23.42    0.93
  -8  -7   0   24.17    1.04
   8   7   0   23.52    1.03
   8   7   0   24.20    1.01
   8   7   0   23.39    0.86
   8   7   0   20.22    0.98
   8   7   0   23.05    0.80
   8   7   0   22.60    0.99
  -9  -7   0   10.91    0.96
  -9  -7   0   12.96    0.99
  -9  -7   0   10.01    0.97
  -9  -7   0   11.73    0.85
  -9  -7   0   11.86    0.87
  -9  -7   0    7.47    0.92
   9   7   0   10.98    0.92
   9   7   0   11.93    0.96
   9   7   0   10.19    0.98
   9   7   0   10.35    0.73
   9   7   0   13.05    0.93
 -10  -7   0    8.92    0.86
 -10  -7   0    8.45    0.90
 -10  -7   0    6.61    0.75
 -10  -7   0    9.51    0.94
 -10  -7   0    7.99    0.76
  10   7   0    9.30    1.02
  10   7   0    6.36    0.71
  10   7   0    8.49    0.74
  10   7   0    7.74    0.89
  10   7   0    8.46    0.81
 -11  -7   0    2.80    0.83
 -11  -7   0    3.33    0.72
 -11  -7   0    2.15    0.74
 -11  -7   0    2.74    0.63
  11   7   0    2.24    0.55
  11   7   0    3.43    0.74
  11   7   0    2.37    0.63
  11   7   0    4.71    0.88
 -12  -7   0   13.12    1.31
 -12  -7   0   10.13    1.22
 -12  -7   0    7.58    0.89
  12   7   0   12.63    1.37
  12   7   0    9.46    0.91
  12   7   0    8.49    0.99
  12   7   0    7.86    1.19
 -13  -7   0    2.58    1.02
 -13  -7   0    0.78    0.84
 -13  -7   0   -0.23    0.91
  13   7   0    0.54    0.68
  13   7   0    0.86    0.93
  13   7   0   -1.10    1.15
  11  -8   0    2.34    0.69
  11  -8   0    1.96    0.69
  11  -8   0    2.38    0.43
 -11   8   0    1.86    0.43
 -11   8   0    2.28    0.81
 -11   8   0    2.63    0.63
  10  -8   0    8.48    0.60
  10  -8   0    9.21    0.97
  10  -8   0    7.75    0.78
  10  -8   0    8.75    1.05
  10  -8   0   10.09    1.25
 -10   8   0    9.38    1.12
 -10   8   0    7.84    0.60
 -10   8   0    9.32    0.85
   9  -8   0   16.69    1.07
   9  -8   0   16.09    0.88
   9  -8   0   16.61    1.15
   9  -8   0   15.93    0.66
   9  -8   0   14.67    0.71
  -9   8   0   16.35    1.24
  -9   8   0   16.04    0.61
  -9   8   0   15.94    0.81
   8  -8   0    8.51    0.88
   8  -8   0    9.90    0.52
   8  -8   0   12.00    0.92
   8  -8   0    9.84    0.55
   8  -8   0    8.63    0.61
   8  -8   0    9.54    0.69
   8  -8   0   10.09    0.58
   8  -8   0    9.43    0.66
  -8   8   0    9.94    0.61
  -8   8   0    9.36    0.45
  -8   8   0    9.83    0.85
   7  -8   0   31.63    0.95
   7  -8   0   35.82    1.18
   7  -8   0   34.55    0.87
   7  -8   0   35.14    0.94
   7  -8   0   34.91    0.93
   7  -8   0   35.07    1.34
   7  -8   0   35.84    0.96
   7  -8   0   35.21    0.95
  -7   8   0   36.24    1.17
   6  -8   0    1.86    0.33
   6  -8   0    2.10    0.30
   6  -8   0    1.09    0.40
   6  -8   0    1.77    0.45
   6  -8   0    1.73    0.35
   6  -8   0    2.12    0.52
   5  -8   0  170.71    3.04
   5  -8   0  173.66    3.22
   5  -8   0  171.13    3.24
   5  -8   0  168.59    3.01
   5  -8   0  169.88    2.86
   5  -8   0  170.63    3.09
   4  -8   0    5.80    0.51
   4  -8   0    6.19    0.52
   4  -8   0    6.28    0.34
   4  -8   0    5.89    0.62
   4  -8   0    5.71    0.49
   3  -8   0   23.01    0.78
   3  -8   0   24.01    0.84
   3  -8   0   24.06    0.73
   2  -8   0    1.10    0.25
   2  -8   0    1.21    0.31
   2  -8   0    1.09    0.35
   2  -8   0    1.12    0.14
   2  -8   0    0.78    0.24
   1  -8   0  323.09    5.49
   1  -8   0  325.33    5.31
   1  -8   0  329.48    5.37
   1  -8   0  330.32    5.16
   1  -8   0  323.60    5.13
  -1   8   0  325.81    5.46
  -1   8   0  325.41    5.12
  -1   8   0  323.95    5.14
   0  -8   0   37.55    0.78
   0  -8   0   37.53    0.75
   0  -8   0   36.53    0.89
   0  -8   0   38.66    0.88
   0  -8   0   38.56    1.06
   0   8   0   36.62    0.75
   0   8   0   38.07    0.99
   0   8   0   37.63    0.77
  -1  -8   0   93.05    1.72
  -1  -8   0   93.02    1.61
  -1  -8   0   94.05    1.71
  -1  -8   0   93.92    1.94
  -1  -8   0   91.63    1.63
  -1  -8   0   90.33    1.68
   1   8   0   93.58    1.61
   1   8   0   89.78    1.79
   1   8   0   89.43    1.64
   1   8   0   91.92    1.74
   1   8   0   92.43    1.63
  -2  -8   0   30.09    0.78
  -2  -8   0   29.73    0.70
  -2  -8   0   30.21    0.75
  -2  -8   0   30.23    0.96
  -2  -8   0   29.68    0.73
  -2  -8   0   30.59    0.75
   2   8   0   30.41    0.74
   2   8   0   30.02    0.94
   2   8   0   30.50    0.70
   2   8   0   30.13    0.81
   2   8   0   29.67    0.81
   2   8   0   27.83    0.78
  -3  -8   0  144.60    2.77
  -3  -8   0  141.96    2.49
  -3  -8   0  146.01    2.52
  -3  -8   0  144.50    2.47
  -3  -8   0  142.32    2.48
  -3  -8   0  142.47    2.56
   3   8   0  140.33    2.72
   3   8   0  137.95    2.49
   3   8   0  142.87    2.58
   3   8   0  142.51    2.51
   3   8   0  141.62    2.54
   3   8   0  141.57    2.45
  -4  -8   0   78.95    1.58
  -4  -8   0   76.19    1.53
  -4  -8   0   78.45    1.63
  -4  -8   0   75.39    1.78
  -4  -8   0   76.28    1.50
  -4  -8   0   77.72    1.50
   4   8   0   70.22    1.61
   4   8   0   79.57    1.76
   4   8   0   77.01    1.63
   4   8   0   78.40    1.57
   4   8   0   78.50    1.55
  -5  -8   0    2.53    0.36
  -5  -8   0    2.55    0.39
  -5  -8   0    3.14    0.35
  -5  -8   0    2.92    0.47
  -5  -8   0    1.87    0.35
  -5  -8   0    2.22    0.34
   5   8   0    2.12    0.32
   5   8   0    2.35    0.35
   5   8   0    1.85    0.28
   5   8   0    2.78    0.38
   5   8   0    2.47    0.39
   5   8   0    2.79    0.45
  -6  -8   0   55.35    1.23
  -6  -8   0   53.03    1.37
  -6  -8   0   51.52    1.24
  -6  -8   0   54.15    1.35
  -6  -8   0   51.53    1.49
  -6  -8   0   53.65    1.28
   6   8   0   52.02    1.21
   6   8   0   51.02    1.30
   6   8   0   53.29    1.46
   6   8   0   49.30    1.26
   6   8   0   52.86    1.32
   6   8   0   54.11    1.38
  -7  -8   0   25.18    0.87
  -7  -8   0   24.30    0.90
  -7  -8   0   24.29    1.00
  -7  -8   0   24.95    0.91
  -7  -8   0   23.13    1.08
  -7  -8   0   23.99    0.99
   7   8   0   23.77    1.01
   7   8   0   24.04    0.85
   7   8   0   23.98    0.96
   7   8   0   23.72    0.94
   7   8   0   23.32    0.80
   7   8   0   25.05    1.08
  -8  -8   0    8.40    0.73
  -8  -8   0    9.27    0.78
  -8  -8   0    8.51    0.88
  -8  -8   0    9.11    0.86
  -8  -8   0    9.67    0.93
  -8  -8   0   10.81    0.76
   8   8   0    8.44    0.63
   8   8   0    7.84    0.89
   8   8   0    8.80    0.83
   8   8   0   10.31    0.89
   8   8   0    8.72    0.68
   8   8   0    9.16    0.83
  -9  -8   0    0.69    0.49
  -9  -8   0    1.23    0.51
  -9  -8   0    1.67    0.54
  -9  -8   0    0.98    0.48
  -9  -8   0   -0.41    0.57
  -9  -8   0    0.51    0.56
   9   8   0    0.35    0.52
   9   8   0    0.02    0.41
   9   8   0    0.07    0.37
   9   8   0    1.01    0.54
   9   8   0    0.30    0.57
   9   8   0    0.65    0.59
 -10  -8   0    0.67    0.67
 -10  -8   0    0.70    0.62
 -10  -8   0    1.10    0.54
 -10  -8   0    0.64    0.64
 -10  -8   0    0.81    0.63
  10   8   0    0.71    0.44
  10   8   0    1.62    0.65
  10   8   0    0.71    0.71
  10   8   0   -0.05    0.46
 -11  -8   0   12.16    1.17
 -11  -8   0   14.03    1.42
 -11  -8   0   14.00    1.36
 -11  -8   0   14.41    1.28
  11   8   0   14.84    1.44
  11   8   0   13.14    1.02
  11   8   0   11.95    1.03
  11   8   0   12.74    0.97
 -12  -8   0    3.47    0.85
 -12  -8   0    2.74    0.94
 -12  -8   0    2.23    0.87
 -12  -8   0    3.05    0.91
  12   8   0    1.37    1.40
  12   8   0    3.47    1.17
  12   8   0    4.11    0.69
  12   8   0    3.82    0.71
  11  -9   0    1.65    0.77
  11  -9   0    0.83    0.43
 -11   9   0    1.11    0.85
  10  -9   0    0.95    0.49
  10  -9   0    1.50    0.60
  10  -9   0    1.36    0.36
  10  -9   0    2.07    0.74
  10  -9   0    2.31    0.83
 -10   9   0    0.07    0.70
   9  -9   0    4.39    0.53
   9  -9   0    5.85    0.81
   9  -9   0    2.97    0.53
   9  -9   0    3.98    0.43
   9  -9   0    3.08    0.67
   8  -9   0   43.12    1.17
   8  -9   0   41.48    1.14
   8  -9   0   44.21    1.50
   8  -9   0   46.10    2.01
   8  -9   0   41.92    0.98
   8  -9   0   40.48    1.10
   8  -9   0   43.79    1.45
   7  -9   0    6.25    0.56
   7  -9   0    7.32    0.82
   7  -9   0    6.24    0.66
   7  -9   0    5.90    0.42
   7  -9   0    6.63    0.66
   7  -9   0    5.14    0.62
   7  -9   0    7.07    0.80
   6  -9   0   33.08    1.09
   6  -9   0   32.46    1.27
   6  -9   0   32.68    0.99
   6  -9   0   33.93    1.02
   6  -9   0   33.51    0.84
   6  -9   0   33.74    1.19
   5  -9   0    5.65    0.61
   5  -9   0    5.32    0.40
   5  -9   0    5.21    0.60
   5  -9   0    5.17    0.60
   5  -9   0    5.75    0.60
   4  -9   0   79.29    1.65
   4  -9   0   78.00    1.40
   4  -9   0   79.56    1.73
   4  -9   0   80.34    1.68
   4  -9   0   79.31    1.80
   3  -9   0    4.13    0.48
   3  -9   0    3.72    0.44
   3  -9   0    4.63    0.47
   3  -9   0    4.91    0.48
   2  -9   0    0.84    0.15
   2  -9   0    1.14    0.28
   2  -9   0    0.77    0.27
   2  -9   0    0.18    0.30
   2  -9   0    0.96    0.31
   1  -9   0   17.05    0.44
   1  -9   0   15.86    0.47
   1  -9   0   16.69    0.68
   1  -9   0   17.23    0.78
   1  -9   0   17.19    0.43
   1  -9   0   16.33    0.60
  -1   9   0   15.05    0.73
  -1   9   0   16.73    0.41
   0  -9   0  304.26    5.03
   0  -9   0  307.77    4.87
   0  -9   0  305.47    5.25
   0  -9   0  303.94    5.00
   0  -9   0  304.86    4.87
   0  -9   0  305.62    4.85
   0   9   0  300.83    5.14
   0   9   0  304.02    4.85
   0   9   0  298.26    4.86
  -1  -9   0   17.21    0.81
  -1  -9   0   17.19    0.59
  -1  -9   0   16.77    0.50
  -1  -9   0   16.53    0.60
  -1  -9   0   16.65    0.53
  -1  -9   0   16.47    0.53
   1   9   0   16.84    0.63
   1   9   0   16.74    0.52
   1   9   0   17.64    0.50
   1   9   0   16.85    0.70
   1   9   0   16.49    0.52
  -2  -9   0  117.39    2.19
  -2  -9   0  125.12    2.23
  -2  -9   0  125.13    2.21
  -2  -9   0  122.84    2.19
  -2  -9   0  125.63    2.52
  -2  -9   0  124.27    2.27
   2   9   0  126.44    2.30
   2   9   0  123.43    2.20
   2   9   0  123.78    2.19
   2   9   0  126.06    2.15
   2   9   0  122.62    2.33
  -3  -9   0   99.16    1.85
  -3  -9   0  100.63    1.87
  -3  -9   0  101.10    1.96
  -3  -9   0   99.82    2.18
  -3  -9   0  103.53    1.91
  -3  -9   0  100.57    1.88
   3   9   0   99.01    1.83
   3   9   0  100.21    1.88
   3   9   0   98.99    1.95
   3   9   0  101.09    1.98
   3   9   0   99.29    1.89
   3   9   0  100.65    2.14
  -4  -9   0  139.28    2.46
  -4  -9   0  139.18    2.53
  -4  -9   0  135.99    2.45
  -4  -9   0  137.97    2.59
  -4  -9   0  136.96    2.80
  -4  -9   0  134.32    2.48
   4   9   0  140.01    2.52
   4   9   0  135.23    2.52
   4   9   0  138.28    2.75
   4   9   0  134.12    2.43
  -5  -9   0   -0.30    0.34
  -5  -9   0    0.20    0.28
  -5  -9   0   -0.09    0.29
  -5  -9   0   -0.10    0.35
  -5  -9   0    0.36    0.27
  -5  -9   0    0.09    0.38
   5   9   0    0.23    0.27
   5   9   0    0.59    0.33
   5   9   0   -0.61    0.29
   5   9   0    0.16    0.41
   5   9   0   -0.06    0.38
  -6  -9   0   10.03    0.77
  -6  -9   0    9.36    0.87
  -6  -9   0    9.18    0.61
  -6  -9   0    9.97    0.75
  -6  -9   0   10.08    0.65
   6   9   0    8.75    0.71
   6   9   0   10.02    0.90
   6   9   0   10.38    0.63
   6   9   0   10.03    0.80
   6   9   0   10.06    0.61
   6   9   0   10.15    0.70
  -7  -9   0    0.11    0.43
  -7  -9   0    0.22    0.43
  -7  -9   0    0.07    0.45
  -7  -9   0    0.12    0.37
  -7  -9   0   -0.07    0.37
  -7  -9   0   -0.69    0.33
   7   9   0   -0.17    0.30
   7   9   0    0.00    0.45
   7   9   0   -0.23    0.41
   7   9   0   -0.58    0.32
   7   9   0   -0.04    0.43
   7   9   0   -0.27    0.47
  -8  -9   0   35.72    1.39
  -8  -9   0   34.14    1.14
  -8  -9   0   31.77    1.39
  -8  -9   0   34.02    1.29
  -8  -9   0   35.30    1.20
  -8  -9   0   33.33    1.18
   8   9   0   32.38    1.22
   8   9   0   34.99    1.10
   8   9   0   34.38    1.24
   8   9   0   32.14    1.29
   8   9   0   34.87    1.36
  -9  -9   0    7.90    0.88
  -9  -9   0    8.71    0.99
  -9  -9   0    6.49    0.71
  -9  -9   0    6.79    0.76
  -9  -9   0    7.11    0.68
  -9  -9   0    5.28    1.36
   9   9   0    7.02    0.71
   9   9   0    6.44    0.85
   9   9   0    6.63    0.73
   9   9   0    7.83    0.82
   9   9   0    8.88    1.03
 -10  -9   0   17.06    1.29
 -10  -9   0   17.97    1.37
 -10  -9   0   16.15    1.41
 -10  -9   0   16.40    1.12
  10   9   0   14.85    1.66
  10   9   0   13.16    1.27
  10   9   0   15.95    0.96
  10   9   0   14.66    1.00
 -11  -9   0    0.21    0.69
 -11  -9   0    1.23    0.94
 -11  -9   0    1.76    0.81
 -11  -9   0   -1.05    0.78
  11   9   0   -0.19    0.57
  11   9   0    1.36    0.74
  11   9   0    1.26    0.58
  11   9   0   -1.15    0.72
 -12  -9   0    3.08    0.99
 -12  -9   0    5.24    0.96
 -12  -9   0    5.89    1.10
 -12  -9   0    4.20    0.98
  12   9   0    4.03    0.93
  12   9   0    4.53    0.78
  10 -10   0    1.31    0.72
  10 -10   0    2.99    0.66
  10 -10   0    2.25    0.41
   9 -10   0   16.86    1.37
   9 -10   0   16.35    0.66
   9 -10   0   15.59    1.23
   9 -10   0   16.08    0.83
   9 -10   0   18.91    1.01
   9 -10   0   16.31    0.95
   8 -10   0    5.65    0.55
   8 -10   0    5.70    0.69
   8 -10   0    5.90    0.59
   8 -10   0    6.10    0.48
   8 -10   0    5.80    0.74
   8 -10   0    6.38    0.73
   7 -10   0   23.57    0.79
   7 -10   0   23.31    1.08
   7 -10   0   22.54    0.99
   7 -10   0   24.20    1.34
   7 -10   0   26.16    1.21
   7 -10   0   23.18    0.95
   7 -10   0   23.10    0.65
   6 -10   0    2.92    0.58
   6 -10   0    1.60    0.30
   6 -10   0    1.38    0.46
   6 -10   0    1.68    0.43
   6 -10   0    1.56    0.63
   5 -10   0    0.12    0.46
   5 -10   0    0.17    0.38
   5 -10   0   -0.01    0.40
   5 -10   0    0.55    0.38
   5 -10   0    0.16    0.38
   4 -10   0    8.60    0.63
   4 -10   0    8.15    0.77
   4 -10   0    8.66    0.65
   4 -10   0    7.32    0.71
   4 -10   0    6.53    0.67
   3 -10   0    3.87    0.42
   3 -10   0    3.45    0.40
   3 -10   0    3.46    0.48
   3 -10   0    3.53    0.47
   3 -10   0    3.22    0.27
   2 -10   0   73.73    1.54
   2 -10   0   74.19    1.75
   2 -10   0   74.24    1.30
   2 -10   0   75.23    1.55
   2 -10   0   75.77    1.66
   1 -10   0    6.52    0.32
   1 -10   0    6.96    0.57
   1 -10   0    6.49    0.38
   1 -10   0    5.95    0.48
   1 -10   0    5.84    0.50
   1 -10   0    6.96    0.34
   1 -10   0    6.37    0.69
  -1  10   0    6.55    0.67
   0 -10   0    2.82    0.34
   0 -10   0    3.37    0.46
   0 -10   0    3.43    0.42
   0 -10   0    3.64    0.31
   0 -10   0    3.29    0.36
   0 -10   0    2.96    0.37
   0  10   0    3.08    0.34
   0  10   0    3.24    0.32
   0  10   0    3.56    0.45
  -1 -10   0   22.65    0.64
  -1 -10   0   22.80    0.74
  -1 -10   0   21.18    0.70
  -1 -10   0   23.02    0.98
  -1 -10   0   22.05    0.60
  -1 -10   0   21.64    0.64
   1  10   0   20.87    0.62
   1  10   0   21.72    0.59
   1  10   0   24.50    0.87
   1  10   0   21.50    0.62
  -2 -10   0   16.52    0.57
  -2 -10   0   16.37    0.64
  -2 -10   0   16.00    0.60
  -2 -10   0   16.71    0.90
  -2 -10   0   16.24    0.64
  -2 -10   0   16.05    0.60
   2  10   0   15.84    0.55
   2  10   0   18.05    0.76
   2  10   0   15.28    0.60
   2  10   0   15.51    0.71
   2  10   0   16.64    0.60
  -3 -10   0   24.41    0.78
  -3 -10   0   23.74    0.81
  -3 -10   0   24.74    0.76
  -3 -10   0   24.40    0.77
  -3 -10   0   22.40    1.03
  -3 -10   0   24.71    0.73
   3  10   0   24.98    0.77
   3  10   0   24.94    0.72
   3  10   0   24.32    0.87
   3  10   0   25.13    0.87
   3  10   0   23.59    0.89
  -4 -10   0    0.76    0.35
  -4 -10   0    0.71    0.31
  -4 -10   0    0.98    0.32
  -4 -10   0    0.86    0.37
  -4 -10   0    1.42    0.47
  -4 -10   0    1.21    0.32
   4  10   0    1.18    0.34
   4  10   0    0.97    0.40
   4  10   0    1.18    0.36
   4  10   0    0.63    0.28
   4  10   0    0.94    0.34
   4  10   0    0.36    0.41
  -5 -10   0   45.78    1.20
  -5 -10   0   47.06    1.51
  -5 -10   0   45.50    1.16
  -5 -10   0   45.64    1.24
  -5 -10   0   47.28    1.30
  -5 -10   0   47.42    1.16
   5  10   0   45.11    1.13
   5  10   0   46.53    1.21
   5  10   0   47.60    1.25
   5  10   0   45.12    1.45
   5  10   0   48.01    1.34
  -6 -10   0    5.71    0.57
  -6 -10   0    6.74    0.72
  -6 -10   0    6.12    0.74
  -6 -10   0    5.58    0.71
  -6 -10   0    5.73    0.64
  -6 -10   0    5.12    0.61
   6  10   0    5.89    0.70
   6  10   0    5.77    0.69
   6  10   0    5.36    0.55
   6  10   0    6.27    0.61
   6  10   0    5.67    0.64
  -7 -10   0   34.34    1.25
  -7 -10   0   34.48    1.13
  -7 -10   0   33.90    1.14
  -7 -10   0   35.00    1.24
  -7 -10   0   32.55    1.07
   7  10   0   35.43    1.09
   7  10   0   31.85    1.26
   7  10   0   35.09    1.19
   7  10   0   34.20    1.21
   7  10   0   33.39    1.08
   7  10   0   32.34    1.36
  -8 -10   0   14.73    1.03
  -8 -10   0   13.89    1.19
  -8 -10   0   15.54    0.99
  -8 -10   0   15.75    0.97
  -8 -10   0   15.88    0.95
  -8 -10   0   16.23    1.13
   8  10   0   15.11    1.05
   8  10   0   14.58    0.85
   8  10   0   14.03    1.56
   8  10   0   15.48    1.14
   8  10   0   14.48    0.85
  -9 -10   0   68.54    1.97
  -9 -10   0   71.31    2.05
  -9 -10   0   62.43    1.76
  -9 -10   0   70.15    2.14
  -9 -10   0   70.96    1.85
  -9 -10   0   71.92    1.87
   9  10   0   71.17    1.73
   9  10   0   67.10    2.00
   9  10   0   71.84    1.89
   9  10   0   69.67    1.96
   9  10   0   69.39    1.71
 -10 -10   0    3.55    0.93
 -10 -10   0    2.19    0.75
 -10 -10   0    0.84    0.82
 -10 -10   0    1.66    0.69
  10  10   0    1.87    0.59
  10  10   0   -0.04    0.81
  10  10   0    0.74    0.74
  10  10   0    2.35    0.57
 -11 -10   0   22.95    1.59
 -11 -10   0   21.49    1.72
 -11 -10   0   23.62    1.50
 -11 -10   0   21.00    1.72
  11  10   0   16.78    1.60
  11  10   0   20.93    1.52
  11  10   0   19.60    1.15
   9 -11   0    4.88    0.94
   9 -11   0    4.39    0.59
   9 -11   0    4.35    0.39
   9 -11   0    4.07    0.81
   8 -11   0   67.81    1.70
   8 -11   0   69.39    1.35
   8 -11   0   68.80    1.50
   8 -11   0   64.70    2.10
   8 -11   0   70.90    2.05
   8 -11   0   73.42    2.05
   7 -11   0   19.93    1.03
   7 -11   0   20.24    0.61
   7 -11   0   22.09    1.26
   7 -11   0   22.17    1.16
   7 -11   0   22.30    1.12
   6 -11   0   13.19    0.97
   6 -11   0   14.46    0.93
   6 -11   0   15.14    1.07
   6 -11   0   12.90    1.15
   6 -11   0   16.44    0.95
   5 -11   0    2.70    0.48
   5 -11   0    3.55    0.51
   5 -11   0    1.71    0.61
   5 -11   0    3.14    0.53
   5 -11   0    2.25    0.50
   5 -11   0    2.71    0.58
   4 -11   0    3.04    0.50
   4 -11   0    2.46    0.48
   4 -11   0    2.87    0.55
   4 -11   0    3.12    0.55
   4 -11   0    2.77    0.45
   3 -11   0    1.13    0.46
   3 -11   0    1.34    0.38
   3 -11   0    2.13    0.47
   3 -11   0    1.84    0.41
   2 -11   0    5.33    0.55
   2 -11   0    6.62    0.68
   2 -11   0    5.76    0.60
   2 -11   0    7.20    0.76
   2 -11   0    6.13    0.32
   1 -11   0    0.60    0.36
   1 -11   0    0.88    0.20
   1 -11   0    0.90    0.32
   1 -11   0    0.94    0.25
   1 -11   0    0.98    0.43
   1 -11   0    0.94    0.33
   0 -11   0   39.97    1.06
   0 -11   0   35.74    1.27
   0 -11   0   38.55    0.89
   0 -11   0   38.73    0.86
   0 -11   0   38.38    0.99
   0 -11   0   39.48    0.85
   0  11   0   38.50    1.20
   0  11   0   38.17    0.83
   0  11   0   39.17    0.87
  -1 -11   0   10.48    0.58
  -1 -11   0    9.70    0.46
  -1 -11   0   10.17    0.85
  -1 -11   0   10.33    0.61
  -1 -11   0   10.53    0.53
  -1 -11   0   10.88    0.51
   1  11   0    9.45    0.46
   1  11   0    8.99    0.74
   1  11   0   10.78    0.50
   1  11   0    9.67    0.51
   1  11   0   10.25    0.47
  -2 -11   0    0.87    0.47
  -2 -11   0    0.99    0.33
  -2 -11   0    1.28    0.30
  -2 -11   0    1.32    0.27
  -2 -11   0    1.04    0.29
  -2 -11   0    0.73    0.32
   2  11   0    0.71    0.38
   2  11   0    1.25    0.39
   2  11   0    1.20    0.28
   2  11   0    1.46    0.31
   2  11   0    1.20    0.29
  -3 -11   0   16.62    0.75
  -3 -11   0   15.76    0.70
  -3 -11   0   15.91    1.01
  -3 -11   0   15.81    0.69
  -3 -11   0   15.83    0.66
  -3 -11   0   16.14    0.70
   3  11   0   14.80    0.80
   3  11   0   15.16    0.68
   3  11   0   15.59    0.68
   3  11   0   15.30    0.63
   3  11   0   16.79    0.84
  -4 -11   0  140.91    3.00
  -4 -11   0  134.72    2.57
  -4 -11   0  141.21    2.70
  -4 -11   0  137.32    2.54
  -4 -11   0  139.81    2.56
  -4 -11   0  136.08    2.61
   4  11   0  142.02    2.61
   4  11   0  138.26    2.72
   4  11   0  136.52    2.66
   4  11   0  136.61    2.51
   4  11   0  138.35    2.60
  -5 -11   0   14.94    0.76
  -5 -11   0   13.66    0.80
  -5 -11   0   14.83    1.28
  -5 -11   0   14.68    0.72
  -5 -11   0   13.37    0.84
  -5 -11   0   15.32    0.86
   5  11   0   14.98    0.93
   5  11   0   14.31    0.81
   5  11   0   13.98    0.98
   5  11   0   15.83    0.75
  -6 -11   0    4.17    0.48
  -6 -11   0    3.27    0.53
  -6 -11   0    4.24    0.55
  -6 -11   0    4.55    0.73
  -6 -11   0    4.93    0.59
  -6 -11   0    4.00    0.52
   6  11   0    3.71    0.51
   6  11   0    4.96    0.56
   6  11   0    4.00    0.49
   6  11   0    4.38    0.55
   6  11   0    4.18    0.64
  -7 -11   0    0.90    0.59
  -7 -11   0    1.81    0.60
  -7 -11   0    0.31    0.64
  -7 -11   0    0.99    0.53
  -7 -11   0    0.49    0.46
  -7 -11   0    0.09    0.45
   7  11   0    1.08    0.60
   7  11   0   -0.23    0.41
   7  11   0    1.07    0.52
   7  11   0    1.06    0.55
   7  11   0   -0.24    0.36
  -8 -11   0   51.23    1.63
  -8 -11   0   51.07    1.56
  -8 -11   0   49.64    1.70
  -8 -11   0   51.23    1.88
  -8 -11   0   50.54    1.54
  -8 -11   0   47.78    1.48
   8  11   0   50.97    1.45
   8  11   0   47.72    1.53
   8  11   0   49.73    1.60
   8  11   0   48.53    1.74
   8  11   0   51.46    1.60
  -9 -11   0    1.41    0.77
  -9 -11   0    1.61    0.66
  -9 -11   0    1.04    0.83
  -9 -11   0    0.50    0.66
  -9 -11   0    1.49    0.66
   9  11   0    1.09    0.70
   9  11   0    0.24    0.54
   9  11   0    1.92    0.68
   9  11   0    1.65    0.58
 -10 -11   0   19.21    1.39
 -10 -11   0   19.31    1.47
 -10 -11   0   19.99    1.73
  10  11   0   17.36    1.16
  10  11   0   17.11    1.45
 -11 -11   0    2.47    0.97
 -11 -11   0    3.24    1.06
  11  11   0    1.93    0.94
  11  11   0    3.08    0.74
   8 -12   0    3.16    0.91
   8 -12   0    1.27    0.63
   8 -12   0   -0.39    0.71
   7 -12   0   21.37    1.29
   7 -12   0   19.35    1.17
   7 -12   0   20.56    1.34
   7 -12   0   19.42    1.29
   6 -12   0   -0.82    0.54
   6 -12   0   -0.35    0.60
   6 -12   0    0.38    0.53
   6 -12   0    0.69    0.55
   6 -12   0   -0.07    0.67
   5 -12   0   31.29    1.15
   5 -12   0   31.14    1.26
   5 -12   0   30.85    1.25
   5 -12   0   31.47    1.16
   5 -12   0   31.17    1.34
   5 -12   0   28.37    1.34
   4 -12   0    8.03    0.73
   4 -12   0    8.80    0.76
   4 -12   0    7.34    0.88
   4 -12   0    7.84    0.75
   4 -12   0    7.42    0.79
   3 -12   0   56.54    1.40
   3 -12   0   57.90    1.57
   3 -12   0   57.50    1.64
   2 -12   0    0.45    0.35
   2 -12   0    0.92    0.43
   2 -12   0    0.71    0.46
   2 -12   0   -0.09    0.18
   2 -12   0   -0.49    0.37
   1 -12   0    9.35    0.75
   1 -12   0   11.18    0.72
   1 -12   0   10.72    0.95
   1 -12   0    9.90    0.45
   1 -12   0   10.08    0.44
   1 -12   0   10.27    0.63
   0 -12   0    5.83    0.67
   0 -12   0    6.90    0.65
   0 -12   0    5.86    0.52
   0 -12   0    5.67    0.42
   0 -12   0    5.94    0.48
   0 -12   0    6.85    0.57
   0  12   0    5.91    0.44
   0  12   0    6.40    0.68
   0  12   0    5.81    0.46
  -1 -12   0   20.13    0.66
  -1 -12   0   19.93    1.13
  -1 -12   0   20.94    0.79
  -1 -12   0   21.33    0.71
  -1 -12   0   20.80    0.83
  -1 -12   0   19.13    0.72
   1  12   0   20.24    0.67
   1  12   0   21.19    0.99
  -2 -12   0    6.85    0.60
  -2 -12   0    7.35    0.63
  -2 -12   0    7.51    0.54
  -2 -12   0    7.45    0.63
  -2 -12   0    6.92    0.58
   2  12   0    7.01    0.55
   2  12   0    8.32    0.75
   2  12   0    6.79    0.56
   2  12   0    7.22    0.54
   2  12   0    6.50    0.57
   2  12   0    8.10    0.80
  -3 -12   0    2.18    0.37
  -3 -12   0    1.86    0.45
  -3 -12   0    1.47    0.38
  -3 -12   0    1.34    0.58
  -3 -12   0    1.01    0.38
  -3 -12   0    1.86    0.38
   3  12   0    1.88    0.50
   3  12   0    1.98    0.42
   3  12   0    1.63    0.39
   3  12   0    1.14    0.34
   3  12   0    1.79    0.37
   3  12   0    2.04    0.49
  -4 -12   0    1.83    0.48
  -4 -12   0    1.15    0.47
  -4 -12   0    0.63    0.42
  -4 -12   0    1.00    0.39
  -4 -12   0    0.98    0.36
  -4 -12   0    1.31    0.63
   4  12   0    0.67    0.42
   4  12   0    1.49    0.52
   4  12   0    0.71    0.36
   4  12   0    1.49    0.43
   4  12   0    1.30    0.47
  -5 -12   0   38.25    1.26
  -5 -12   0   38.39    1.15
  -5 -12   0   38.98    1.21
  -5 -12   0   38.20    1.13
  -5 -12   0   37.94    1.57
  -5 -12   0   39.99    1.28
   5  12   0   40.39    1.24
   5  12   0   39.28    1.12
   5  12   0   39.57    1.25
   5  12   0   39.74    1.36
  -6 -12   0    0.57    0.47
  -6 -12   0    0.69    0.48
  -6 -12   0    1.09    0.52
  -6 -12   0    0.52    0.54
  -6 -12   0    1.91    0.69
  -6 -12   0    0.35    0.50
   6  12   0    0.12    0.59
   6  12   0    0.08    0.43
   6  12   0    0.28    0.47
   6  12   0    0.88    0.53
  -7 -12   0    1.27    0.60
  -7 -12   0    0.44    0.59
  -7 -12   0    1.36    0.74
  -7 -12   0    2.28    0.60
  -7 -12   0    1.38    0.54
  -7 -12   0    1.66    0.53
   7  12   0    1.09    0.58
   7  12   0    1.32    0.70
   7  12   0    2.35    0.64
   7  12   0    0.77    0.54
   7  12   0    2.78    0.55
  -8 -12   0    1.42    0.63
  -8 -12   0   -0.44    0.59
  -8 -12   0    0.56    0.62
  -8 -12   0    2.30    0.83
   8  12   0    0.51    0.66
   8  12   0    1.39    0.61
   8  12   0   -0.35    0.48
   8  12   0    0.80    0.71
   8  12   0   -0.07    0.74
  -9 -12   0    6.87    0.87
  -9 -12   0    6.84    0.90
  -9 -12   0    6.46    1.02
   9  12   0    6.59    0.79
   9  12   0    6.83    0.82
 -10 -12   0    2.26    1.07
 -10 -12   0    1.41    0.88
  10  12   0    0.30    0.91
  10  12   0    1.94    0.72
   7 -13   0    3.51    0.90
   7 -13   0    3.52    0.77
   7 -13   0    4.68    1.11
   7 -13   0    4.29    0.80
   7 -13   0    4.03    0.87
   6 -13   0    0.85    0.64
   6 -13   0    1.45    0.62
   6 -13   0    0.23    0.69
   6 -13   0    0.48    0.67
   6 -13   0    0.95    0.78
   5 -13   0    3.17    0.61
   5 -13   0    3.06    0.66
   5 -13   0    5.14    0.78
   5 -13   0    3.94    0.72
   5 -13   0    4.46    0.82
   4 -13   0   32.59    1.20
   4 -13   0   32.30    1.38
   4 -13   0   32.79    1.15
   4 -13   0   31.39    1.68
   4 -13   0   31.46    1.40
   3 -13   0    8.02    0.77
   3 -13   0    8.80    1.03
   3 -13   0    9.88    0.88
   3 -13   0    9.43    1.01
   3 -13   0    8.09    1.14
   2 -13   0   14.06    1.37
   2 -13   0   14.38    0.98
   2 -13   0   14.68    0.50
   2 -13   0   13.76    0.87
   2 -13   0   13.69    0.80
   1 -13   0    4.73    0.48
   1 -13   0    4.31    0.64
   1 -13   0    5.50    0.60
   1 -13   0    4.86    0.71
   1 -13   0    4.38    0.41
   0 -13   0    8.97    0.87
   0 -13   0    7.72    0.56
   0 -13   0    7.33    0.64
   0 -13   0    7.55    0.49
   0 -13   0    6.88    0.61
   0 -13   0    7.73    0.77
   0  13   0    8.26    0.53
   0  13   0    7.90    0.49
  -1 -13   0   -0.26    0.40
  -1 -13   0    0.56    0.29
  -1 -13   0    0.03    0.35
  -1 -13   0   -0.37    0.34
  -1 -13   0    0.25    0.38
  -1 -13   0   -0.65    0.55
   1  13   0    1.03    0.84
   1  13   0    0.00    0.32
   1  13   0    0.01    0.31
  -2 -13   0    7.15    0.57
  -2 -13   0    6.51    0.67
  -2 -13   0    6.29    0.68
  -2 -13   0    5.49    0.51
  -2 -13   0    6.46    0.71
  -2 -13   0    6.06    0.80
   2  13   0    5.32    0.48
   2  13   0    5.85    0.59
   2  13   0    5.61    0.60
   2  13   0    6.86    0.60
  -3 -13   0    4.69    0.78
  -3 -13   0    4.40    0.45
  -3 -13   0    4.30    0.52
  -3 -13   0    3.38    0.51
  -3 -13   0    3.24    0.49
  -3 -13   0    4.72    0.57
   3  13   0    3.55    0.52
   3  13   0    4.21    0.45
   3  13   0    3.40    0.46
   3  13   0    4.43    0.48
   3  13   0    4.68    0.75
   3  13   0    4.63    0.63
  -4 -13   0   41.54    1.23
  -4 -13   0   40.00    1.40
  -4 -13   0   42.42    1.30
  -4 -13   0   38.71    1.67
  -4 -13   0   39.79    1.24
  -4 -13   0   40.92    1.26
   4  13   0   42.70    1.39
   4  13   0   39.67    1.41
   4  13   0   42.23    1.25
   4  13   0   40.75    1.15
   4  13   0   41.91    1.21
  -5 -13   0   13.67    1.02
  -5 -13   0   14.53    0.92
  -5 -13   0   15.34    0.92
  -5 -13   0   16.28    1.02
  -5 -13   0   18.38    1.39
   5  13   0   16.12    1.14
   5  13   0   14.99    0.87
   5  13   0   15.59    0.97
   5  13   0   16.92    1.00
   5  13   0   16.38    1.03
  -6 -13   0    2.14    0.60
  -6 -13   0    3.39    0.81
  -6 -13   0    2.81    0.57
  -6 -13   0    2.19    0.60
   6  13   0    4.21    0.80
   6  13   0    3.45    0.59
   6  13   0    3.74    0.65
   6  13   0    3.57    0.62
   6  13   0    2.36    0.65
  -7 -13   0    1.07    0.63
  -7 -13   0   -0.02    0.81
  -7 -13   0    0.68    0.64
  -7 -13   0    1.06    0.66
   7  13   0    0.31    0.84
   7  13   0    1.01    0.54
   7  13   0    1.72    0.65
   7  13   0    1.01    0.63
  -8 -13   0   10.82    1.19
  -8 -13   0    9.87    1.06
  -8 -13   0   13.20    1.26
   8  13   0   12.48    1.17
   8  13   0   15.14    1.27
  -9 -13   0    1.15    0.76
  -9 -13   0    0.86    1.00
   9  13   0    0.69    0.72
   9  13   0   -0.38    0.84
   6 -14   0   -1.20    0.88
   6 -14   0    0.31    0.83
   6 -14   0   -0.97    0.69
   6 -14   0    0.81    0.75
   5 -14   0    4.18    0.81
   5 -14   0    4.11    0.77
   5 -14   0    3.93    0.78
   5 -14   0    4.42    0.96
   5 -14   0    4.84    0.69
   4 -14   0    1.06    0.59
   4 -14   0    1.57    0.65
   4 -14   0    3.40    0.78
   4 -14   0    1.24    0.82
   3 -14   0   27.66    1.47
   3 -14   0   26.65    1.50
   3 -14   0   28.38    1.11
   3 -14   0   29.05    1.21
   2 -14   0   -0.01    0.64
   2 -14   0   -0.64    0.57
   2 -14   0   -0.64    0.43
   2 -14   0    0.36    0.53
   2 -14   0    0.01    0.24
   1 -14   0    0.60    0.53
   1 -14   0    0.15    0.41
   1 -14   0   -0.07    0.52
   1 -14   0    0.44    0.67
   1 -14   0    0.44    0.27
   0 -14   0    1.42    0.69
   0 -14   0    1.66    0.54
   0 -14   0    1.64    0.42
   0 -14   0    2.55    0.46
   0 -14   0    1.22    0.53
   0 -14   0    1.38    0.32
   0  14   0    1.43    0.68
  -1 -14   0    1.00    0.34
  -1 -14   0    2.04    0.54
  -1 -14   0    1.96    0.47
  -1 -14   0    1.72    0.47
  -1 -14   0    2.63    0.74
   1  14   0    1.17    0.62
   1  14   0    1.25    0.39
   1  14   0    2.08    0.37
  -2 -14   0    1.61    0.75
  -2 -14   0    0.94    0.48
  -2 -14   0    0.34    0.52
  -2 -14   0    0.76    0.38
  -2 -14   0    0.78    0.47
   2  14   0    2.06    0.65
   2  14   0    1.13    0.38
   2  14   0    0.84    0.42
  -3 -14   0    7.49    0.86
  -3 -14   0    8.46    0.96
  -3 -14   0    7.01    0.84
  -3 -14   0    7.42    0.73
  -3 -14   0    7.79    0.86
   3  14   0    8.32    0.77
   3  14   0    6.81    0.75
   3  14   0    7.89    0.75
   3  14   0    7.56    0.77
   3  14   0    7.55    0.80
  -4 -14   0    8.75    0.90
  -4 -14   0   10.44    1.09
  -4 -14   0   10.03    0.95
  -4 -14   0    9.75    0.85
  -4 -14   0   11.75    0.95
   4  14   0   11.64    0.87
   4  14   0   10.64    0.89
   4  14   0    9.84    1.16
   4  14   0   11.94    1.09
   4  14   0    9.08    0.83
  -5 -14   0   34.87    1.40
  -5 -14   0   37.44    1.85
  -5 -14   0   34.86    1.37
  -5 -14   0   35.53    1.31
   5  14   0   36.85    1.50
   5  14   0   33.29    1.21
   5  14   0   37.10    1.28
   5  14   0   37.84    1.34
   5  14   0   36.81    1.60
  -6 -14   0    0.97    0.68
  -6 -14   0    0.81    0.83
  -6 -14   0    1.67    0.65
  -6 -14   0    0.69    0.59
   6  14   0    0.99    0.77
   6  14   0    0.76    0.85
   6  14   0    0.71    0.66
   6  14   0    1.56    0.69
  -7 -14   0    0.21    0.88
  -7 -14   0    0.21    0.73
   7  14   0    0.64    0.71
   7  14   0   -0.06    0.91
   7  14   0   -0.28    0.69
  -8 -14   0   -0.25    1.05
  -8 -14   0    2.34    0.83
   8  14   0    1.84    0.80
   8  14   0    1.40    0.82
   5 -15   0    1.90    0.72
   5 -15   0   -0.18    0.77
   5 -15   0   -0.08    0.83
   4 -15   0    3.32    0.69
   4 -15   0    3.17    0.88
   3 -15   0    0.67    0.56
   3 -15   0   -0.05    0.62
   3 -15   0    0.04    0.84
   2 -15   0    0.02    0.65
   2 -15   0   -0.38    0.80
   2 -15   0    0.21    0.51
   1 -15   0   14.24    0.92
   1 -15   0   15.37    1.50
   1 -15   0   15.65    0.65
   1 -15   0   13.94    1.11
   0 -15   0    1.61    0.51
   0 -15   0    1.45    0.37
   0 -15   0    0.30    0.75
   0 -15   0    0.95    0.62
  -1 -15   0    1.89    0.86
  -1 -15   0    0.95    0.52
  -1 -15   0    1.64    0.40
  -1 -15   0    1.17    0.55
   1  15   0    1.38    0.39
   1  15   0   -0.48    0.76
   1  15   0    2.27    0.43
  -2 -15   0    3.61    0.64
  -2 -15   0    2.97    0.87
  -2 -15   0    1.92    0.58
  -2 -15   0    2.78    0.47
   2  15   0    3.69    0.49
   2  15   0    2.30    0.80
   2  15   0    4.08    0.52
  -3 -15   0    8.05    1.04
  -3 -15   0    6.88    0.72
  -3 -15   0    7.93    0.83
  -3 -15   0    7.15    0.76
   3  15   0    6.31    0.58
   3  15   0    7.01    0.94
   3  15   0    8.65    0.84
   3  15   0    7.16    0.83
  -4 -15   0    9.41    1.12
  -4 -15   0    7.92    0.90
  -4 -15   0    8.36    1.04
  -4 -15   0    7.91    0.77
   4  15   0    9.07    0.90
   4  15   0    8.02    0.88
   4  15   0    8.64    0.95
   4  15   0    7.78    0.93
   4  15   0    7.54    0.93
  -5 -15   0    0.69    0.67
  -5 -15   0    1.40    0.96
   5  15   0    0.52    0.61
   5  15   0    1.62    0.88
   5  15   0   -0.04    0.73
  -6 -15   0    1.44    0.71
  -6 -15   0    0.00    0.93
   6  15   0    0.80    0.99
   6  15   0   -0.88    0.66
   6  15   0    0.62    0.79
  -7 -15   0   12.17    1.35
  -7 -15   0    8.83    1.22
   7  15   0    8.39    0.99
   7  15   0    8.45    0.98
   3 -16   0   -0.70    0.87
   3 -16   0    0.74    0.58
   2 -16   0    3.67    0.68
   2 -16   0    3.94    1.03
   1 -16   0    1.80    0.60
   1 -16   0    1.91    0.40
   1 -16   0    1.21    0.95
   0 -16   0    2.35    0.61
   0 -16   0    2.13    0.45
   0 -16   0    4.21    1.03
  -1 -16   0    6.48    0.71
  -1 -16   0    5.66    0.72
  -1 -16   0    5.96    0.57
  -1 -16   0    5.94    1.07
   1  16   0    7.74    1.09
   1  16   0    6.99    0.57
  -2 -16   0    5.80    0.76
  -2 -16   0    7.07    1.05
  -2 -16   0    5.82    0.59
   2  16   0    5.78    0.63
   2  16   0    5.21    0.60
   2  16   0    7.18    1.01
  -3 -16   0   -0.57    0.96
  -3 -16   0   -0.27    0.65
   3  16   0   -0.45    0.53
   3  16   0    1.45    0.88
   3  16   0   -0.65    0.53
  -4 -16   0   -1.42    0.67
  -4 -16   0   -1.33    0.95
   4  16   0    1.06    0.92
   4  16   0   -0.47    0.59
  -5 -16   0    2.51    0.82
  -5 -16   0    1.56    1.09
   5  16   0    3.32    0.75
   5  16   0    1.62    0.93
   4  16  -1    0.73    0.87
   4  16  -1   -0.61    0.60
  -4 -16   1   -0.12    0.77
  -4 -16   1   -0.60    1.00
   3  16  -1    1.64    0.58
   3  16  -1    0.19    0.55
   3  16  -1    1.01    0.88
  -3 -16   1    0.20    0.70
  -3 -16   1    0.77    1.00
   2  16  -1    2.23    0.55
   2  16  -1    1.98    0.55
   2  16  -1    1.14    0.91
  -2 -16   1    1.16    0.97
  -2 -16   1    0.84    0.68
  -2 -16   1    1.40    0.50
   1  16  -1    0.05    0.87
  -1 -16   1    0.84    0.46
  -1 -16   1    0.33    0.61
  -1 -16   1   -0.59    0.60
  -1 -16   1    0.18    0.96
   0 -16   1    0.09    1.05
   0 -16   1    0.21    0.42
   0 -16   1   -1.12    0.61
   0 -16   1    0.17    0.88
   1 -16   1    7.71    1.12
   1 -16   1    8.13    0.75
   1 -16   1   10.35    1.07
   2 -16   1   20.52    1.20
   2 -16   1   16.20    1.75
   6  15  -1    5.41    0.94
   6  15  -1    2.97    0.75
  -6 -15   1    4.06    0.87
  -6 -15   1    3.32    1.06
   5  15  -1    8.14    1.09
   5  15  -1    6.85    0.91
   5  15  -1    8.80    1.04
  -5 -15   1    7.65    1.18
  -5 -15   1    7.78    0.87
   4  15  -1   -0.52    0.83
   4  15  -1    0.06    0.53
   4  15  -1   -0.19    0.53
   4  15  -1   -0.49    0.53
   4  15  -1   -0.34    0.75
  -4 -15   1   -0.09    0.61
  -4 -15   1   -0.45    0.48
  -4 -15   1   -0.45    0.83
   3  15  -1    0.71    0.50
   3  15  -1    0.18    0.47
   3  15  -1   -0.30    0.77
  -3 -15   1   -0.38    0.80
  -3 -15   1    0.15    0.46
  -3 -15   1   -0.05    0.59
  -3 -15   1   -0.56    0.59
   2  15  -1    1.01    0.45
   2  15  -1    0.86    0.48
   2  15  -1   -0.76    0.77
  -2 -15   1    0.63    0.56
  -2 -15   1    0.70    0.44
  -2 -15   1    0.18    0.57
  -2 -15   1    3.19    0.88
   1  15  -1    0.61    0.39
   1  15  -1   -0.47    0.38
   1  15  -1   -0.77    0.75
  -1 -15   1    0.14    0.52
  -1 -15   1   -0.33    0.37
  -1 -15   1   -0.93    0.50
  -1 -15   1   -0.15    0.76
   0 -15   1    7.09    0.64
   0 -15   1    6.51    0.79
   0 -15   1    5.48    0.96
   0 -15   1    7.17    0.85
   1 -15   1    1.43    0.70
   1 -15   1    3.05    0.84
   1 -15   1    0.38    0.55
   1 -15   1    0.52    0.32
   2 -15   1    5.39    0.65
   2 -15   1    6.09    0.92
   2 -15   1    5.98    0.80
   3 -15   1   16.01    1.52
   3 -15   1   14.42    1.25
   3 -15   1   15.01    1.06
   4 -15   1    0.06    0.84
   4 -15   1    0.43    0.65
   4 -15   1    0.51    0.79
   5 -15   1    1.92    0.91
   5 -15   1    1.40    0.75
   5 -15   1   -0.19    0.83
   8  14  -1    9.76    1.02
   8  14  -1   12.87    1.37
  -8 -14   1   12.90    1.39
  -8 -14   1   10.42    1.30
   7  14  -1    9.32    0.92
   7  14  -1   10.56    1.22
  -7 -14   1   10.20    1.25
  -7 -14   1   10.90    1.25
   6  14  -1   55.30    2.05
   6  14  -1   57.25    1.83
   6  14  -1   59.96    1.74
  -6 -14   1   58.32    2.25
  -6 -14   1   62.20    1.84
  -6 -14   1   63.18    2.07
   5  14  -1   15.35    1.02
   5  14  -1   14.68    1.45
   5  14  -1   16.75    1.08
   5  14  -1   16.41    1.24
   5  14  -1   15.39    0.97
  -5 -14   1   15.30    1.52
  -5 -14   1   16.42    1.21
  -5 -14   1   14.30    1.12
  -5 -14   1   16.58    1.13
  -5 -14   1   14.87    1.47
   4  14  -1   16.33    1.32
   4  14  -1   16.77    0.99
   4  14  -1   17.36    0.98
   4  14  -1   19.45    1.20
  -4 -14   1   19.23    1.53
  -4 -14   1   13.90    0.98
  -4 -14   1   19.09    0.96
  -4 -14   1   15.58    1.05
  -4 -14   1   16.52    1.09
   3  14  -1    1.72    0.44
   3  14  -1    1.04    0.63
   3  14  -1    0.86    0.66
   3  14  -1    0.96    0.48
   3  14  -1    0.65    0.45
  -3 -14   1    1.03    0.43
  -3 -14   1    0.90    0.54
  -3 -14   1    1.90    0.54
  -3 -14   1    1.63    0.78
  -3 -14   1    0.86    0.52
   2  14  -1    7.60    0.70
   2  14  -1    7.18    0.80
   2  14  -1    6.51    0.68
  -2 -14   1    5.36    0.89
  -2 -14   1    7.15    0.78
  -2 -14   1    7.64    0.86
  -2 -14   1    7.27    0.66
  -2 -14   1    6.34    0.80
   1  14  -1    4.15    0.76
   1  14  -1    4.35    0.46
   1  14  -1    4.84    0.45
  -1 -14   1    4.81    0.58
  -1 -14   1    5.81    0.61
  -1 -14   1    3.92    0.83
  -1 -14   1    5.25    0.51
  -1 -14   1    4.31    0.42
   0 -14   1    0.00    0.28
   0 -14   1    0.87    0.52
   0 -14   1    0.08    0.39
   0 -14   1    0.10    0.69
   0 -14   1   -0.15    0.42
   1 -14   1   -0.46    0.64
   1 -14   1   -0.06    0.55
   1 -14   1    0.25    0.54
   1 -14   1    0.09    0.43
   1 -14   1    0.03    0.26
   2 -14   1   10.29    1.24
   2 -14   1    6.72    0.73
   2 -14   1    5.74    0.67
   2 -14   1    5.23    0.79
   2 -14   1    7.74    0.83
   3 -14   1   -0.45    0.70
   3 -14   1    0.35    0.62
   3 -14   1    0.28    0.68
   3 -14   1    1.22    0.54
   4 -14   1    0.61    0.71
   4 -14   1    1.69    0.68
   4 -14   1    1.27    0.81
   4 -14   1    0.52    0.57
   5 -14   1    2.41    0.66
   5 -14   1    2.18    0.78
   5 -14   1    3.31    0.79
   5 -14   1    1.13    0.94
   5 -14   1    3.55    0.82
   6 -14   1    0.07    0.79
   6 -14   1    1.84    1.01
   6 -14   1    0.53    0.75
   6 -14   1    1.24    0.83
   9  13  -1    6.00    0.94
   9  13  -1    9.16    0.90
  -9 -13   1    6.32    0.97
  -9 -13   1    8.98    1.21
   8  13  -1    0.86    0.72
   8  13  -1    2.96    0.70
  -8 -13   1   -0.15    0.87
  -8 -13   1    0.77    0.73
   7  13  -1    1.39    0.82
   7  13  -1    0.29    0.63
   7  13  -1    1.40    0.67
   7  13  -1    0.35    0.64
  -7 -13   1    0.29    0.62
  -7 -13   1   -0.53    0.76
  -7 -13   1   -0.45    0.70
  -7 -13   1    1.62    0.65
   6  13  -1    5.03    0.87
   6  13  -1    4.79    0.59
   6  13  -1    5.04    0.66
   6  13  -1    6.01    0.71
   6  13  -1    5.09    0.75
  -6 -13   1    4.50    0.64
  -6 -13   1    5.30    0.75
  -6 -13   1    4.08    0.62
  -6 -13   1    6.09    0.96
  -6 -13   1    4.72    0.70
   5  13  -1    8.00    0.93
   5  13  -1    7.36    0.82
   5  13  -1    7.71    0.85
   5  13  -1    7.52    0.77
   5  13  -1    7.16    0.66
  -5 -13   1    7.54    0.78
  -5 -13   1    7.01    0.84
  -5 -13   1    8.13    0.93
  -5 -13   1    7.26    0.86
  -5 -13   1    8.56    1.01
   4  13  -1   10.02    0.78
   4  13  -1   10.28    0.76
   4  13  -1   10.88    0.85
   4  13  -1   12.31    0.97
   4  13  -1   11.85    1.09
  -4 -13   1    9.82    0.91
  -4 -13   1   10.87    1.13
  -4 -13   1   12.68    1.31
  -4 -13   1    9.26    0.86
  -4 -13   1   12.15    0.82
   3  13  -1    8.25    0.71
   3  13  -1    7.53    0.74
   3  13  -1    7.76    0.71
   3  13  -1    8.93    0.70
   3  13  -1    6.39    0.74
  -3 -13   1    5.99    0.83
  -3 -13   1    8.27    0.79
  -3 -13   1    8.79    0.75
  -3 -13   1    7.65    0.66
  -3 -13   1    7.25    0.79
  -3 -13   1    7.51    0.71
   2  13  -1    1.27    0.39
   2  13  -1    1.12    0.38
   2  13  -1    1.63    0.37
   2  13  -1    1.63    0.35
   2  13  -1    1.02    0.62
  -2 -13   1    1.20    0.35
  -2 -13   1    0.81    0.41
  -2 -13   1    0.65    0.45
  -2 -13   1    1.15    0.42
  -2 -13   1    0.94    0.65
  -2 -13   1    0.94    0.40
   1  13  -1   28.88    0.85
   1  13  -1   30.54    0.84
   1  13  -1   29.90    1.26
  -1 -13   1   26.93    0.90
  -1 -13   1   27.68    0.89
  -1 -13   1   28.94    1.40
  -1 -13   1   28.48    0.82
  -1 -13   1   28.83    1.00
  -1 -13   1   30.12    1.02
   0  13  -1    8.07    1.20
   0  13  -1    8.13    0.49
   0 -13   1    9.92    1.09
   0 -13   1    7.76    0.71
   0 -13   1    8.25    0.49
   0 -13   1    8.03    0.59
   0 -13   1    6.66    0.55
   0 -13   1    7.81    0.78
   1 -13   1    3.46    0.66
   1 -13   1    2.99    0.56
   1 -13   1    3.42    0.54
   1 -13   1    3.18    0.29
   1 -13   1    3.05    0.48
   2 -13   1    7.42    0.75
   2 -13   1    6.64    0.40
   2 -13   1    6.25    0.67
   2 -13   1    5.24    0.73
   2 -13   1    6.39    0.65
   3 -13   1   16.37    0.93
   3 -13   1   15.37    0.96
   3 -13   1   13.89    1.15
   3 -13   1   14.99    1.12
   3 -13   1   15.78    1.10
   4 -13   1   -0.01    0.61
   4 -13   1    0.08    0.64
   4 -13   1   -0.03    0.47
   4 -13   1   -0.20    0.53
   5 -13   1    0.13    0.59
   5 -13   1   -0.98    0.61
   5 -13   1    0.46    0.55
   5 -13   1   -0.07    0.68
   5 -13   1    0.89    0.65
   6 -13   1    0.45    0.81
   6 -13   1    0.91    0.70
   6 -13   1    1.02    0.70
   6 -13   1    1.20    0.63
   6 -13   1    0.35    0.67
   7 -13   1    6.92    0.97
   7 -13   1    6.20    0.89
   7 -13   1    6.99    0.97
   7 -13   1    7.68    0.90
   7 -13   1    8.09    0.92
  10  12  -1    2.94    0.92
  10  12  -1    0.92    0.68
 -10 -12   1    0.11    1.10
 -10 -12   1    2.41    0.85
   9  12  -1    2.53    0.68
   9  12  -1    3.21    0.81
  -9 -12   1    2.24    0.74
  -9 -12   1    1.82    0.97
  -9 -12   1    2.82    0.85
   8  12  -1    0.76    0.58
   8  12  -1    0.51    0.66
   8  12  -1   -0.14    0.52
   8  12  -1    0.20    0.61
  -8 -12   1   -0.76    0.62
  -8 -12   1    0.77    0.66
  -8 -12   1    0.68    0.64
  -8 -12   1    1.36    0.80
   7  12  -1   17.82    1.37
   7  12  -1   18.28    1.05
   7  12  -1   19.84    1.20
   7  12  -1   18.78    0.97
   7  12  -1   17.31    1.13
  -7 -12   1   19.58    1.14
  -7 -12   1   18.85    1.18
  -7 -12   1   18.65    1.46
  -7 -12   1   19.85    1.13
  -7 -12   1   17.15    1.04
   6  12  -1    1.98    0.71
   6  12  -1    1.86    0.53
   6  12  -1    2.07    0.56
   6  12  -1    0.30    0.44
   6  12  -1    1.88    0.50
  -6 -12   1    1.51    0.57
  -6 -12   1    2.51    0.53
  -6 -12   1    3.15    0.78
  -6 -12   1    1.39    0.50
  -6 -12   1    2.26    0.62
  -6 -12   1    1.98    0.55
   5  12  -1   -0.22    0.46
   5  12  -1    1.28    0.58
   5  12  -1   -0.36    0.49
   5  12  -1   -0.42    0.37
   5  12  -1    0.18    0.48
   5  12  -1   -1.02    0.44
  -5 -12   1   -0.35    0.40
  -5 -12   1   -0.12    0.46
  -5 -12   1    0.13    0.48
  -5 -12   1   -0.24    0.60
  -5 -12   1   -0.50    0.46
  -5 -12   1   -0.57    0.38
   4  12  -1    1.48    0.47
   4  12  -1    2.13    0.42
   4  12  -1    1.68    0.42
   4  12  -1    1.95    0.56
   4  12  -1    1.78    0.49
   4  12  -1    1.95    0.38
  -4 -12   1    1.54    0.43
  -4 -12   1    1.42    0.48
  -4 -12   1    2.35    0.42
  -4 -12   1    2.07    0.52
  -4 -12   1    2.38    0.64
  -4 -12   1    2.26    0.45
   3  12  -1    1.60    0.51
   3  12  -1    1.44    0.33
   3  12  -1    2.52    0.48
   3  12  -1    0.91    0.40
   3  12  -1    2.10    0.39
   3  12  -1    1.45    0.39
  -3 -12   1    1.12    0.36
  -3 -12   1    1.09    0.56
  -3 -12   1    1.31    0.33
  -3 -12   1    1.62    0.41
  -3 -12   1    1.54    0.46
  -3 -12   1    1.35    0.42
   2  12  -1   15.56    0.67
   2  12  -1   15.10    0.62
   2  12  -1   14.43    0.67
   2  12  -1   15.81    0.91
   2  12  -1   15.37    0.68
   2  12  -1   16.26    0.92
  -2 -12   1   15.74    0.72
  -2 -12   1   15.55    1.09
  -2 -12   1   15.32    0.65
  -2 -12   1   16.55    0.79
  -2 -12   1   14.77    0.73
  -2 -12   1   15.40    0.69
   1  12  -1   27.65    0.77
   1  12  -1   24.32    0.90
   1  12  -1   26.62    1.10
  -1 -12   1   27.37    0.93
  -1 -12   1   27.11    0.81
  -1 -12   1   26.08    0.90
  -1 -12   1   27.05    0.75
  -1 -12   1   27.09    0.80
   0  12  -1    1.32    0.28
   0  12  -1    1.14    0.48
   0  12  -1    1.16    0.27
   0 -12   1    1.18    0.40
   0 -12   1    1.31    0.26
   0 -12   1    1.26    0.38
   0 -12   1    0.61    0.49
   0 -12   1    1.12    0.29
   0 -12   1    0.71    0.36
   1 -12   1    1.53    0.23
   1 -12   1    2.14    0.45
   1 -12   1    1.54    0.45
   1 -12   1    2.26    0.57
   1 -12   1    1.48    0.40
   2 -12   1   28.11    1.02
   2 -12   1   27.29    1.20
   2 -12   1   25.64    0.61
   2 -12   1   25.50    1.02
   2 -12   1   25.91    0.95
   3 -12   1    4.79    0.62
   3 -12   1    4.27    0.55
   3 -12   1    4.28    0.59
   3 -12   1    4.20    0.64
   3 -12   1    4.71    0.53
   4 -12   1    7.19    0.72
   4 -12   1    7.02    0.83
   4 -12   1    8.59    0.81
   4 -12   1    8.01    0.74
   4 -12   1    6.61    0.70
   5 -12   1    9.47    0.99
   5 -12   1   10.67    0.95
   5 -12   1    9.93    0.97
   5 -12   1   10.36    1.11
   5 -12   1   10.23    1.00
   5 -12   1   11.87    0.93
   6 -12   1   23.07    1.19
   6 -12   1   23.17    1.24
   6 -12   1   24.54    1.31
   6 -12   1   24.40    1.30
   6 -12   1   24.63    1.18
   7 -12   1   13.87    1.27
   7 -12   1   13.91    1.12
   7 -12   1   12.62    1.15
   7 -12   1   14.49    1.24
   7 -12   1   12.27    1.24
   8 -12   1   14.02    1.33
   8 -12   1   14.76    1.56
   8 -12   1   15.44    1.22
  11  11  -1    1.29    0.74
  11  11  -1   -0.38    0.92
 -11 -11   1    2.42    0.91
 -11 -11   1   -0.19    1.02
  10  11  -1   -0.12    0.65
  10  11  -1    0.82    0.81
 -10 -11   1    1.48    0.76
 -10 -11   1   -1.47    0.89
 -10 -11   1   -0.46    0.68
   9  11  -1   11.09    1.17
   9  11  -1    8.35    0.89
   9  11  -1   10.35    1.01
   9  11  -1    9.70    1.16
  -9 -11   1    7.95    1.07
  -9 -11   1    8.97    0.96
  -9 -11   1    8.23    0.85
  -9 -11   1    7.47    1.04
   8  11  -1    3.90    0.80
   8  11  -1    2.55    0.64
   8  11  -1    2.42    0.54
   8  11  -1    2.76    0.69
   8  11  -1    3.49    0.58
  -8 -11   1    2.42    0.61
  -8 -11   1    1.44    0.69
  -8 -11   1    4.03    0.82
  -8 -11   1    2.89    0.66
  -8 -11   1    2.36    0.64
  -8 -11   1    2.23    0.59
   7  11  -1   10.11    1.13
   7  11  -1   10.19    0.96
   7  11  -1   10.61    0.82
   7  11  -1   10.83    1.12
   7  11  -1    9.70    0.92
  -7 -11   1   10.54    0.85
  -7 -11   1   11.13    1.23
  -7 -11   1    9.16    1.20
  -7 -11   1   10.50    0.94
  -7 -11   1   12.25    0.93
  -7 -11   1    9.20    0.82
   6  11  -1    2.87    0.64
   6  11  -1    2.85    0.52
   6  11  -1    3.06    0.61
   6  11  -1    1.86    0.57
   6  11  -1    2.78    0.45
   6  11  -1    2.43    0.47
  -6 -11   1    2.83    0.66
  -6 -11   1    3.51    0.59
  -6 -11   1    3.37    0.53
  -6 -11   1    2.95    0.48
  -6 -11   1    4.37    0.62
  -6 -11   1    2.90    0.48
   5  11  -1    1.15    0.42
   5  11  -1    0.42    0.49
   5  11  -1    0.18    0.43
   5  11  -1    0.80    0.39
   5  11  -1   -0.02    0.48
   5  11  -1    0.10    0.49
  -5 -11   1    0.61    0.35
  -5 -11   1    0.11    0.40
  -5 -11   1    0.69    0.47
  -5 -11   1    0.38    0.45
  -5 -11   1    1.13    0.39
  -5 -11   1    0.88    0.56
   4  11  -1    0.14    0.40
   4  11  -1    0.76    0.40
   4  11  -1    0.15    0.31
   4  11  -1    0.33    0.44
   4  11  -1    0.40    0.39
  -4 -11   1    0.18    0.40
  -4 -11   1    0.06    0.61
  -4 -11   1    0.17    0.37
  -4 -11   1    0.12    0.30
  -4 -11   1   -0.56    0.31
  -4 -11   1   -0.07    0.35
   3  11  -1    0.34    0.33
   3  11  -1    0.64    0.41
   3  11  -1   -0.17    0.30
   3  11  -1   -0.11    0.25
   3  11  -1    0.07    0.29
   3  11  -1   -0.24    0.36
  -3 -11   1   -0.38    0.29
  -3 -11   1   -0.04    0.29
  -3 -11   1    0.16    0.35
  -3 -11   1    0.44    0.32
  -3 -11   1    0.19    0.46
   2  11  -1    2.36    0.35
   2  11  -1    2.05    0.32
   2  11  -1    2.21    0.30
   2  11  -1    1.94    0.46
   2  11  -1    1.57    0.42
   2  11  -1    2.24    0.33
  -2 -11   1    2.06    0.32
  -2 -11   1    1.96    0.51
  -2 -11   1    1.99    0.30
  -2 -11   1    2.15    0.35
  -2 -11   1    2.44    0.34
  -2 -11   1    2.33    0.39
   1  11  -1   15.29    0.83
   1  11  -1   14.92    0.56
   1  11  -1   14.52    0.57
  -1 -11   1   15.44    0.55
  -1 -11   1   14.14    0.92
  -1 -11   1   14.28    0.58
  -1 -11   1   15.49    0.68
  -1 -11   1   14.64    0.58
  -1 -11   1   15.74    0.69
   0  11  -1    0.39    0.40
   0  11  -1    0.05    0.21
   0  11  -1    0.15    0.22
   0 -11   1   -0.48    0.23
   0 -11   1    0.07    0.29
   0 -11   1   -0.09    0.18
   0 -11   1    0.05    0.41
   0 -11   1   -0.14    0.23
   0 -11   1    0.17    0.33
   1 -11   1    3.86    0.44
   1 -11   1    4.12    0.43
   1 -11   1    4.17    0.31
   1 -11   1    3.72    0.57
   1 -11   1    3.44    0.46
   2 -11   1    3.91    0.55
   2 -11   1    4.01    0.47
   2 -11   1    3.55    0.46
   2 -11   1    3.79    0.43
   3 -11   1    3.42    0.46
   3 -11   1    3.71    0.51
   3 -11   1    4.11    0.56
   3 -11   1    3.28    0.52
   3 -11   1    2.86    0.45
   4 -11   1    5.66    0.69
   4 -11   1    7.32    0.74
   4 -11   1    5.97    0.62
   4 -11   1    5.03    0.63
   4 -11   1    5.47    0.59
   5 -11   1    0.26    0.46
   5 -11   1    0.98    0.46
   5 -11   1   -0.57    0.42
   5 -11   1    0.95    0.53
   5 -11   1    0.57    0.46
   5 -11   1    0.48    0.57
   6 -11   1   15.70    1.01
   6 -11   1   13.70    0.94
   6 -11   1   15.44    1.06
   6 -11   1   13.93    1.18
   6 -11   1   14.03    0.97
   7 -11   1   10.10    1.00
   7 -11   1    7.61    0.91
   7 -11   1    9.61    1.11
   7 -11   1   10.76    1.05
   8 -11   1    0.76    0.66
   8 -11   1    2.40    0.79
   8 -11   1    2.57    0.60
   8 -11   1    2.25    0.69
   9 -11   1    5.59    0.98
   9 -11   1    4.89    0.51
   9 -11   1    6.87    0.96
   9 -11   1    4.10    0.60
  11  10  -1    1.79    0.61
  11  10  -1    0.59    0.87
 -11 -10   1    0.36    0.76
 -11 -10   1    2.39    1.00
 -11 -10   1    4.79    0.98
  10  10  -1    5.60    0.91
  10  10  -1    5.06    0.71
  10  10  -1    8.80    0.93
  10  10  -1    4.37    0.62
 -10 -10   1    5.51    0.99
 -10 -10   1    5.31    0.82
 -10 -10   1    4.44    0.93
 -10 -10   1    5.73    0.91
   9  10  -1    1.65    0.73
   9  10  -1   -0.59    0.62
   9  10  -1   -0.07    0.47
   9  10  -1    0.85    0.50
   9  10  -1    0.29    0.76
  -9 -10   1    0.70    0.72
  -9 -10   1    0.06    0.59
  -9 -10   1    0.05    0.75
  -9 -10   1    1.38    0.70
  -9 -10   1    0.37    0.57
   8  10  -1   -0.08    0.62
   8  10  -1    0.61    0.42
   8  10  -1    0.29    0.52
   8  10  -1   -0.11    0.46
   8  10  -1    0.28    0.57
  -8 -10   1   -0.02    0.47
  -8 -10   1   -0.38    0.47
  -8 -10   1    0.51    0.49
  -8 -10   1    0.45    0.61
  -8 -10   1    0.64    0.62
  -8 -10   1    0.09    0.54
   7  10  -1    4.09    0.66
   7  10  -1    3.50    0.45
   7  10  -1    4.08    0.59
   7  10  -1    3.53    0.50
   7  10  -1    3.31    0.61
  -7 -10   1    4.04    0.75
  -7 -10   1    3.55    0.54
  -7 -10   1    3.58    0.60
  -7 -10   1    2.75    0.50
  -7 -10   1    3.41    0.57
  -7 -10   1    3.18    0.47
   6  10  -1   -0.31    0.41
   6  10  -1    0.60    0.49
   6  10  -1    0.30    0.46
   6  10  -1   -0.02    0.35
  -6 -10   1   -0.27    0.40
  -6 -10   1   -0.07    0.37
  -6 -10   1   -0.46    0.40
  -6 -10   1    0.11    0.50
  -6 -10   1   -0.13    0.34
  -6 -10   1    0.16    0.44
   5  10  -1   -0.01    0.31
   5  10  -1    0.20    0.30
   5  10  -1    0.05    0.37
   5  10  -1   -0.10    0.44
  -5 -10   1   -0.44    0.34
  -5 -10   1    0.37    0.41
  -5 -10   1   -0.56    0.35
  -5 -10   1    0.14    0.33
  -5 -10   1    0.40    0.47
  -5 -10   1    0.00    0.30
   4  10  -1   26.53    0.88
   4  10  -1   27.65    0.91
   4  10  -1   26.05    0.89
   4  10  -1   26.05    0.80
   4  10  -1   26.69    1.00
  -4 -10   1   26.88    0.82
  -4 -10   1   27.56    0.87
  -4 -10   1   27.40    1.17
  -4 -10   1   26.36    0.82
  -4 -10   1   25.18    0.89
  -4 -10   1   27.82    0.96
   3  10  -1   12.07    0.53
   3  10  -1   11.89    0.67
   3  10  -1   10.37    0.61
   3  10  -1   12.30    0.74
   3  10  -1   12.87    0.60
  -3 -10   1   12.00    0.65
  -3 -10   1   11.58    0.60
  -3 -10   1   12.04    0.59
  -3 -10   1   12.13    0.56
  -3 -10   1   12.29    0.85
  -3 -10   1   10.95    0.56
   2  10  -1   -0.01    0.29
   2  10  -1   -0.08    0.23
   2  10  -1   -0.45    0.24
   2  10  -1    0.42    0.33
   2  10  -1   -0.20    0.24
   2  10  -1   -0.07    0.20
  -2 -10   1   -0.23    0.24
  -2 -10   1   -0.18    0.22
  -2 -10   1    0.08    0.26
  -2 -10   1    0.37    0.38
  -2 -10   1    0.15    0.23
  -2 -10   1    0.13    0.27
   1  10  -1    2.66    0.39
   1  10  -1    2.90    0.32
   1  10  -1    1.95    0.40
   1  10  -1    3.27    0.29
   1  10  -1    2.68    0.27
   1  10  -1    2.32    0.28
  -1 -10   1    2.71    0.29
  -1 -10   1    2.53    0.29
  -1 -10   1    2.69    0.33
  -1 -10   1    2.63    0.35
  -1 -10   1    3.06    0.27
  -1 -10   1    2.05    0.43
   0  10  -1   -0.08    0.17
   0  10  -1   -0.12    0.33
   0  10  -1    0.04    0.18
   0 -10   1    0.20    0.27
   0 -10   1    0.27    0.34
   0 -10   1    0.13    0.16
   0 -10   1   -0.01    0.19
   0 -10   1   -0.01    0.19
   0 -10   1   -0.19    0.24
   1 -10   1    9.26    0.34
   1 -10   1    9.82    0.75
   1 -10   1    8.86    0.59
   1 -10   1    9.36    0.57
   2 -10   1   13.32    0.72
   2 -10   1   13.39    0.66
   2 -10   1   13.36    0.64
   2 -10   1   12.18    0.79
   2 -10   1   12.91    0.36
   3 -10   1   10.65    0.73
   3 -10   1   10.54    0.65
   3 -10   1   10.00    0.66
   3 -10   1   10.67    0.75
   3 -10   1   10.44    0.74
   4 -10   1    2.41    0.42
   4 -10   1    2.03    0.45
   4 -10   1    2.57    0.45
   4 -10   1    1.95    0.41
   4 -10   1    1.97    0.49
   5 -10   1   -0.02    0.38
   5 -10   1    0.61    0.43
   5 -10   1    0.20    0.39
   5 -10   1   -0.37    0.37
   5 -10   1   -0.24    0.44
   6 -10   1    2.81    0.54
   6 -10   1    2.61    0.48
   6 -10   1    3.49    0.61
   6 -10   1    2.09    0.60
   6 -10   1    2.28    0.53
   7 -10   1    5.01    0.66
   7 -10   1    4.89    0.81
   7 -10   1    3.71    0.72
   7 -10   1    4.40    0.70
   7 -10   1    4.66    0.37
   7 -10   1    4.04    0.51
   8 -10   1    2.47    0.29
   8 -10   1    2.45    0.65
   8 -10   1    1.29    0.57
   8 -10   1    2.91    0.51
   8 -10   1    1.93    0.67
   8 -10   1    1.77    0.41
   9 -10   1    2.48    0.33
   9 -10   1    2.60    0.83
   9 -10   1    1.26    0.49
   9 -10   1    2.46    0.75
   9 -10   1    2.40    0.55
   9 -10   1    2.50    0.49
  10 -10   1   15.77    1.08
  10 -10   1   13.02    0.69
  10 -10   1   13.50    1.33
  12   9  -1    1.89    0.71
  12   9  -1   -0.29    1.00
 -12  -9   1    0.85    1.11
 -12  -9   1    2.32    1.03
 -12  -9   1    0.57    0.85
 -12  -9   1   -1.41    0.95
  11   9  -1    2.06    0.68
  11   9  -1    0.74    0.83
  11   9  -1    1.88    1.34
  11   9  -1    0.59    0.55
 -11  -9   1    0.16    0.75
 -11  -9   1    0.87    0.72
 -11  -9   1    0.75    1.13
 -11  -9   1    1.81    0.84
  10   9  -1    6.89    0.84
  10   9  -1    8.62    0.88
  10   9  -1    8.25    0.86
  10   9  -1    8.96    1.20
  10   9  -1   11.23    0.95
 -10  -9   1    8.15    0.94
 -10  -9   1    8.81    1.04
 -10  -9   1    8.62    0.96
 -10  -9   1    7.31    0.86
   9   9  -1    6.42    0.84
   9   9  -1    7.16    0.78
   9   9  -1    6.89    0.80
   9   9  -1    7.16    0.77
   9   9  -1    5.25    0.72
  -9  -9   1    7.29    0.72
  -9  -9   1    7.28    0.83
  -9  -9   1    9.42    1.12
  -9  -9   1    5.97    0.74
  -9  -9   1    6.99    0.75
   8   9  -1   -0.23    0.48
   8   9  -1    0.53    0.58
   8   9  -1    0.85    0.42
   8   9  -1    0.96    0.60
  -8  -9   1   -0.28    0.51
  -8  -9   1   -0.31    0.41
  -8  -9   1    0.67    0.44
  -8  -9   1    0.42    0.55
  -8  -9   1    0.84    0.54
  -8  -9   1    0.26    0.44
   7   9  -1    4.66    0.55
   7   9  -1    5.31    0.59
   7   9  -1    5.57    0.60
   7   9  -1    5.27    0.63
  -7  -9   1    5.27    0.63
  -7  -9   1    4.87    0.60
  -7  -9   1    4.33    0.58
  -7  -9   1    5.06    0.69
  -7  -9   1    4.79    0.56
  -7  -9   1    4.50    0.51
   6   9  -1   -0.24    0.29
   6   9  -1    0.55    0.40
   6   9  -1    0.48    0.32
   6   9  -1    0.45    0.44
   6   9  -1    0.18    0.40
  -6  -9   1    0.14    0.37
  -6  -9   1   -0.20    0.30
  -6  -9   1    0.78    0.35
  -6  -9   1    0.84    0.45
  -6  -9   1    0.02    0.41
  -6  -9   1   -0.18    0.38
   5   9  -1    1.90    0.33
   5   9  -1    1.78    0.38
   5   9  -1    1.69    0.44
   5   9  -1    1.66    0.40
  -5  -9   1    1.63    0.31
  -5  -9   1    2.09    0.52
  -5  -9   1    2.28    0.45
  -5  -9   1    1.87    0.41
  -5  -9   1    2.41    0.37
  -5  -9   1    2.04    0.38
   4   9  -1    0.35    0.25
   4   9  -1    0.65    0.37
   4   9  -1    0.76    0.32
   4   9  -1    1.84    0.32
   4   9  -1    0.65    0.27
  -4  -9   1    0.84    0.36
  -4  -9   1    0.71    0.40
  -4  -9   1    0.69    0.29
  -4  -9   1    0.88    0.27
  -4  -9   1    0.60    0.27
  -4  -9   1    0.70    0.31
   3   9  -1    6.61    0.52
   3   9  -1    6.01    0.50
   3   9  -1    6.04    0.58
   3   9  -1    6.06    0.49
   3   9  -1    6.31    0.44
  -3  -9   1    6.51    0.70
  -3  -9   1    6.98    0.45
  -3  -9   1    6.25    0.48
  -3  -9   1    7.80    0.53
  -3  -9   1    6.57    0.49
  -3  -9   1    6.51    0.44
   2   9  -1    2.01    0.35
   2   9  -1    1.76    0.28
   2   9  -1    1.98    0.33
   2   9  -1    1.77    0.24
   2   9  -1    2.00    0.28
  -2  -9   1    1.72    0.28
  -2  -9   1    2.17    0.32
  -2  -9   1    1.59    0.26
  -2  -9   1    2.13    0.44
  -2  -9   1    1.95    0.29
  -2  -9   1    2.21    0.30
   1   9  -1    2.08    0.36
   1   9  -1    1.58    0.20
   1   9  -1    1.78    0.24
   1   9  -1    1.95    0.25
   1   9  -1    1.92    0.33
   1   9  -1    2.21    0.24
  -1  -9   1    1.83    0.21
  -1  -9   1    2.15    0.30
  -1  -9   1    1.80    0.25
  -1  -9   1    1.98    0.44
  -1  -9   1    1.54    0.23
  -1  -9   1    2.08    0.40
   0   9  -1   12.34    0.65
   0   9  -1   10.76    0.41
   0   9  -1   11.45    0.40
   0  -9   1   12.40    0.57
   0  -9   1   10.87    0.42
   0  -9   1   11.74    0.41
   0  -9   1   11.54    0.39
   0  -9   1   12.17    0.54
   0  -9   1   10.15    0.70
  -1   9  -1   17.81    0.77
   1  -9   1   17.82    0.46
   1  -9   1   17.79    0.44
   1  -9   1   16.92    0.79
   1  -9   1   17.67    0.64
   1  -9   1   18.04    0.69
   2  -9   1    7.27    0.51
   2  -9   1    7.13    0.52
   2  -9   1    7.10    0.57
   2  -9   1    7.56    0.61
   3  -9   1   14.59    0.66
   3  -9   1   14.20    0.73
   3  -9   1   15.55    0.72
   3  -9   1   14.08    0.73
   3  -9   1   14.01    0.65
   4  -9   1    2.90    0.41
   4  -9   1    2.44    0.44
   4  -9   1    3.28    0.41
   5  -9   1   -0.50    0.33
   5  -9   1    1.06    0.44
   5  -9   1    0.12    0.38
   5  -9   1    0.04    0.33
   5  -9   1   -0.08    0.34
   6  -9   1    1.40    0.19
   6  -9   1    1.29    0.37
   6  -9   1    0.75    0.44
   6  -9   1    0.86    0.25
   6  -9   1    1.19    0.41
   6  -9   1    1.63    0.48
   6  -9   1    1.90    0.56
   7  -9   1    1.84    0.52
   7  -9   1    1.84    0.25
   7  -9   1    1.14    0.64
   7  -9   1    1.62    0.32
   7  -9   1    2.31    0.51
   7  -9   1    1.71    0.41
   7  -9   1    1.16    0.43
   8  -9   1    2.18    0.29
   8  -9   1    2.06    0.48
   8  -9   1    2.24    0.74
   8  -9   1    1.97    0.56
   8  -9   1    1.49    0.62
   8  -9   1    2.34    0.40
   8  -9   1    1.51    0.42
   9  -9   1    0.77    0.46
   9  -9   1    0.83    0.30
   9  -9   1    0.75    0.41
   9  -9   1    1.04    0.45
   9  -9   1    1.93    0.72
   9  -9   1    0.13    0.55
  10  -9   1    1.49    0.56
  10  -9   1    1.86    0.94
  10  -9   1    0.58    0.33
  10  -9   1   -0.03    0.63
  11  -9   1   11.71    0.77
  11  -9   1   11.35    1.10
  11  -9   1   13.89    1.06
  12   8  -1    1.31    0.87
  12   8  -1   -1.79    0.61
  12   8  -1    0.91    1.38
  12   8  -1    0.32    0.60
 -12  -8   1   -0.61    0.89
 -12  -8   1   -0.42    0.85
 -12  -8   1   -0.34    0.82
 -12  -8   1    0.64    0.81
  11   8  -1   15.95    1.44
  11   8  -1   16.48    1.34
  11   8  -1   15.58    1.71
  11   8  -1   15.08    1.03
  11   8  -1   13.97    1.05
 -11  -8   1   16.71    1.22
 -11  -8   1   15.56    1.56
 -11  -8   1   16.45    1.30
 -11  -8   1   16.00    1.42
  10   8  -1   34.79    2.46
  10   8  -1   34.20    1.18
  10   8  -1   35.72    1.43
 -10  -8   1   35.06    1.55
 -10  -8   1   35.58    1.34
 -10  -8   1   36.72    1.51
 -10  -8   1   31.71    1.34
   9   8  -1   -0.31    0.45
   9   8  -1    0.55    0.61
   9   8  -1   -0.48    0.49
   9   8  -1    0.34    0.37
   9   8  -1    0.80    0.58
  -9  -8   1   -0.03    0.55
  -9  -8   1    0.02    0.52
  -9  -8   1    0.37    0.51
  -9  -8   1    1.14    0.57
  -9  -8   1    0.25    0.43
   8   8  -1    0.65    0.47
   8   8  -1    0.65    0.33
   8   8  -1    0.15    0.54
   8   8  -1    1.20    0.48
   8   8  -1    0.02    0.36
  -8  -8   1    0.14    0.40
  -8  -8   1    0.68    0.51
  -8  -8   1    0.07    0.41
  -8  -8   1    0.50    0.49
  -8  -8   1    0.40    0.51
  -8  -8   1    0.20    0.41
   7   8  -1    0.47    0.43
   7   8  -1    0.59    0.40
   7   8  -1    0.69    0.32
   7   8  -1    1.09    0.45
   7   8  -1    0.89    0.32
  -7  -8   1    1.96    0.45
  -7  -8   1    0.94    0.36
  -7  -8   1    1.20    0.38
  -7  -8   1    0.49    0.35
  -7  -8   1    1.39    0.50
  -7  -8   1    0.64    0.42
   6   8  -1   13.82    0.77
   6   8  -1   14.50    0.67
   6   8  -1   13.78    0.81
   6   8  -1   14.31    0.63
   6   8  -1   13.99    0.76
   6   8  -1   13.21    0.86
  -6  -8   1   13.00    0.72
  -6  -8   1   13.50    0.69
  -6  -8   1   13.05    0.78
  -6  -8   1   14.64    0.90
  -6  -8   1   13.32    0.78
  -6  -8   1   13.88    0.65
   5   8  -1    5.23    0.54
   5   8  -1    5.96    0.68
   5   8  -1    4.70    0.49
   5   8  -1    5.67    0.47
   5   8  -1    5.45    0.55
  -5  -8   1    4.64    0.58
  -5  -8   1    5.93    0.58
  -5  -8   1    5.21    0.50
  -5  -8   1    5.19    0.45
  -5  -8   1    6.12    0.52
  -5  -8   1    5.96    0.60
   4   8  -1   13.82    0.54
   4   8  -1   15.36    0.63
   4   8  -1   13.91    0.57
  -4  -8   1   13.71    0.56
  -4  -8   1   13.22    0.58
  -4  -8   1   14.31    0.79
  -4  -8   1   13.74    0.63
  -4  -8   1   14.41    0.56
  -4  -8   1   14.43    0.67
   3   8  -1    1.61    0.26
   3   8  -1    1.79    0.33
   3   8  -1    1.89    0.29
   3   8  -1    1.55    0.23
   3   8  -1    2.15    0.29
  -3  -8   1    2.41    0.41
  -3  -8   1    1.76    0.24
  -3  -8   1    2.26    0.26
  -3  -8   1    1.89    0.27
  -3  -8   1    2.22    0.32
  -3  -8   1    1.93    0.31
   2   8  -1   67.81    1.38
   2   8  -1   68.65    1.42
   2   8  -1   60.60    1.39
   2   8  -1   68.58    1.25
   2   8  -1   67.15    1.30
  -2  -8   1   66.34    1.27
  -2  -8   1   67.01    1.31
  -2  -8   1   63.79    1.54
  -2  -8   1   67.20    1.38
  -2  -8   1   66.65    1.29
  -2  -8   1   68.83    1.31
   1   8  -1   28.61    0.66
   1   8  -1   26.99    0.61
   1   8  -1   28.00    0.79
   1   8  -1   27.54    0.66
   1   8  -1   27.82    0.66
   1   8  -1   28.70    0.80
  -1  -8   1   28.15    0.66
  -1  -8   1   28.47    0.67
  -1  -8   1   29.45    0.93
  -1  -8   1   27.94    0.72
  -1  -8   1   27.86    0.75
  -1  -8   1   28.03    0.64
   0   8  -1   29.52    0.84
   0   8  -1   28.40    0.62
   0   8  -1   28.53    0.61
   0  -8   1   28.66    0.91
   0  -8   1   28.99    0.61
   0  -8   1   28.47    0.75
   0  -8   1   27.87    0.64
   0  -8   1   27.82    0.62
   0  -8   1   27.99    0.76
  -1   8  -1   22.58    0.78
   1  -8   1   22.90    0.69
   1  -8   1   23.13    0.71
   1  -8   1   22.53    0.49
   1  -8   1   22.39    0.80
   2  -8   1   70.03    1.44
   2  -8   1   70.74    1.54
   2  -8   1   71.23    1.91
   2  -8   1   70.10    1.43
   3  -8   1    0.95    0.29
   3  -8   1    0.71    0.31
   3  -8   1    1.38    0.29
   3  -8   1    1.48    0.31
   3  -8   1    1.26    0.29
   4  -8   1   31.42    1.01
   4  -8   1   31.25    0.91
   4  -8   1   31.29    0.99
   4  -8   1   33.41    0.94
   4  -8   1   30.97    0.91
   5  -8   1  122.69    2.34
   5  -8   1  125.37    2.53
   5  -8   1  125.70    2.49
   5  -8   1  124.79    2.35
   6  -8   1   15.06    0.80
   6  -8   1   15.23    0.67
   6  -8   1   14.37    0.55
   6  -8   1   14.79    0.44
   6  -8   1   14.67    0.92
   6  -8   1   14.98    0.70
   6  -8   1   15.38    0.83
   7  -8   1    4.42    0.46
   7  -8   1    4.12    0.62
   7  -8   1    4.43    0.58
   7  -8   1    3.91    0.37
   7  -8   1    4.53    0.67
   7  -8   1    4.43    0.42
  -8   8  -1    1.89    0.52
   8  -8   1    1.94    0.37
   8  -8   1    1.52    0.37
   8  -8   1    1.95    0.28
   8  -8   1    0.87    0.38
   8  -8   1    1.37    0.36
   8  -8   1    1.35    0.49
   8  -8   1    1.61    0.29
   8  -8   1    1.48    0.55
  -9   8  -1    2.00    0.30
  -9   8  -1    0.68    0.66
   9  -8   1    1.31    0.53
   9  -8   1    1.91    0.37
   9  -8   1    2.48    0.66
   9  -8   1    2.36    0.33
   9  -8   1    2.01    0.40
   9  -8   1    2.40    0.46
 -10   8  -1    1.13    0.68
 -10   8  -1    0.78    0.47
 -10   8  -1    0.44    0.31
  10  -8   1    0.60    0.44
  10  -8   1    0.31    0.32
  10  -8   1    0.51    0.71
  10  -8   1   -0.23    0.56
  10  -8   1    0.32    0.52
 -11   8  -1    1.34    0.56
 -11   8  -1    1.18    0.80
 -11   8  -1    1.25    0.40
  11  -8   1    1.26    0.40
  11  -8   1    1.54    0.65
  11  -8   1    0.97    0.72
  11  -8   1    0.98    0.50
  12   7  -1   -1.33    0.83
  12   7  -1    2.03    1.37
  12   7  -1    0.33    0.56
  12   7  -1   -0.06    0.49
  12   7  -1    2.15    1.08
 -12  -7   1    1.45    0.85
 -12  -7   1   -0.10    0.72
 -12  -7   1   -0.40    1.05
 -12  -7   1   -0.18    0.66
  11   7  -1   -0.32    0.66
  11   7  -1    0.78    0.51
  11   7  -1    0.23    0.85
  11   7  -1    1.05    0.69
  11   7  -1    0.83    0.52
 -11  -7   1    0.47    0.58
 -11  -7   1    0.48    0.64
 -11  -7   1    0.31    0.69
 -11  -7   1    1.89    0.71
  10   7  -1   19.90    0.92
  10   7  -1   21.56    1.01
  10   7  -1   18.79    1.30
  10   7  -1   20.04    1.18
  10   7  -1   20.36    1.43
 -10  -7   1   22.76    1.20
 -10  -7   1   18.71    1.18
 -10  -7   1   22.36    1.29
 -10  -7   1   20.29    1.29
 -10  -7   1   19.76    1.07
   9   7  -1   30.21    1.20
   9   7  -1   30.36    1.04
   9   7  -1   27.65    1.19
   9   7  -1   25.68    1.24
  -9  -7   1   29.40    1.09
  -9  -7   1   30.28    1.25
  -9  -7   1   28.64    1.24
  -9  -7   1   29.36    1.13
  -9  -7   1   27.02    1.21
   8   7  -1    1.49    0.49
   8   7  -1    2.39    0.36
   8   7  -1    2.48    0.54
   8   7  -1    2.01    0.48
   8   7  -1    1.84    0.38
  -8  -7   1    2.30    0.52
  -8  -7   1    2.21    0.45
  -8  -7   1    1.79    0.48
  -8  -7   1    2.02    0.53
  -8  -7   1    1.90    0.42
  -8  -7   1    0.86    0.39
   7   7  -1    0.73    0.40
   7   7  -1   -0.03    0.25
   7   7  -1    0.29    0.31
   7   7  -1    0.34    0.38
   7   7  -1    0.49    0.38
   7   7  -1    0.28    0.35
  -7  -7   1    0.02    0.41
  -7  -7   1    0.93    0.37
  -7  -7   1   -0.09    0.35
  -7  -7   1    0.03    0.38
  -7  -7   1    0.17    0.32
  -7  -7   1   -0.01    0.30
   6   7  -1    2.73    0.33
   6   7  -1    2.01    0.41
   6   7  -1    2.08    0.37
   6   7  -1    1.67    0.41
   6   7  -1    1.94    0.32
   6   7  -1    2.63    0.40
  -6  -7   1    2.01    0.34
  -6  -7   1    2.08    0.34
  -6  -7   1    2.46    0.34
  -6  -7   1    2.61    0.43
  -6  -7   1    2.11    0.40
   5   7  -1   38.39    1.01
   5   7  -1   38.53    1.07
   5   7  -1   39.64    1.03
   5   7  -1   39.89    1.15
   5   7  -1   39.34    0.93
   5   7  -1   38.57    0.94
  -5  -7   1   40.53    1.01
  -5  -7   1   39.21    1.07
  -5  -7   1   40.15    0.98
  -5  -7   1   38.52    1.17
  -5  -7   1   40.01    1.09
  -5  -7   1   39.59    0.94
   4   7  -1    2.44    0.31
   4   7  -1    1.82    0.27
   4   7  -1    2.01    0.32
   4   7  -1    1.97    0.34
   4   7  -1    1.81    0.26
  -4  -7   1    2.33    0.27
  -4  -7   1    2.13    0.32
  -4  -7   1    2.13    0.36
  -4  -7   1    1.55    0.24
  -4  -7   1    2.15    0.37
  -4  -7   1    1.75    0.25
   3   7  -1   18.90    0.86
   3   7  -1   20.52    0.60
   3   7  -1   19.04    0.60
   3   7  -1   20.03    0.56
   3   7  -1   19.41    0.68
  -3  -7   1   20.82    0.62
  -3  -7   1   19.99    0.57
  -3  -7   1   20.11    0.56
  -3  -7   1   19.53    0.59
  -3  -7   1   20.21    0.78
  -3  -7   1   20.27    0.66
   2   7  -1  102.66    1.79
   2   7  -1  103.42    1.85
   2   7  -1  101.40    1.84
   2   7  -1  106.57    1.95
   2   7  -1  103.98    1.90
  -2  -7   1  107.11    1.86
  -2  -7   1  103.96    1.81
  -2  -7   1  104.27    1.84
  -2  -7   1  102.94    1.83
  -2  -7   1  105.54    1.92
  -2  -7   1  102.99    2.07
   1   7  -1    1.66    0.26
   1   7  -1    2.81    0.27
   1   7  -1    1.97    0.26
   1   7  -1    1.78    0.18
   1   7  -1    1.65    0.19
  -1  -7   1    1.81    0.20
  -1  -7   1    1.71    0.20
  -1  -7   1    2.07    0.25
  -1  -7   1    1.36    0.21
  -1  -7   1    1.90    0.23
  -1  -7   1    1.31    0.29
   0   7  -1  123.83    2.26
   0   7  -1  124.92    2.05
   0   7  -1  122.67    2.05
   0  -7   1  123.67    2.18
   0  -7   1  124.18    2.05
   0  -7   1  124.96    2.33
   0  -7   1  125.50    2.06
   0  -7   1  123.38    2.20
   0  -7   1  125.60    2.04
  -1   7  -1    7.59    0.48
   1  -7   1    8.64    0.49
   1  -7   1    8.13    0.25
   1  -7   1    8.41    0.44
   1  -7   1    8.33    0.43
   2  -7   1   46.62    1.03
   2  -7   1   47.02    1.05
   2  -7   1   46.29    1.10
   2  -7   1   47.55    1.09
   3  -7   1   12.96    0.55
   3  -7   1   13.20    0.56
   3  -7   1   13.27    0.54
   3  -7   1   12.51    0.63
   4  -7   1    1.09    0.31
   4  -7   1    0.83    0.25
   4  -7   1    1.38    0.28
   4  -7   1    1.45    0.30
   4  -7   1    0.93    0.33
   5  -7   1   86.68    1.70
   5  -7   1   89.97    1.92
   5  -7   1   83.95    1.84
   5  -7   1   85.09    1.55
   5  -7   1   87.60    1.71
   5  -7   1   88.25    1.80
  -6   7  -1   53.41    1.34
   6  -7   1   52.64    1.21
   6  -7   1   52.73    1.38
   6  -7   1   53.62    1.02
   6  -7   1   54.84    1.37
   6  -7   1   54.23    1.00
   6  -7   1   53.43    1.10
   6  -7   1   54.51    1.18
  -7   7  -1   30.74    0.67
  -7   7  -1   30.76    0.77
  -7   7  -1   30.76    1.06
   7  -7   1   30.33    0.72
   7  -7   1   30.31    0.82
   7  -7   1   28.72    0.86
   7  -7   1   28.79    1.04
   7  -7   1   31.20    1.08
   7  -7   1   29.09    0.82
   7  -7   1   30.13    0.79
   7  -7   1   29.65    0.71
  -8   7  -1    2.42    0.50
  -8   7  -1    2.02    0.27
  -8   7  -1    2.09    0.36
   8  -7   1    2.42    0.47
   8  -7   1    1.94    0.28
   8  -7   1    2.18    0.40
   8  -7   1    1.98    0.37
   8  -7   1    2.55    0.32
   8  -7   1    2.49    0.35
   8  -7   1    2.47    0.33
   8  -7   1    2.31    0.50
  -9   7  -1   10.81    0.55
  -9   7  -1   11.04    0.71
  -9   7  -1   10.39    0.93
   9  -7   1   10.84    0.78
   9  -7   1   10.72    0.76
   9  -7   1   11.64    0.93
   9  -7   1   10.93    0.56
   9  -7   1   12.96    1.03
 -10   7  -1   15.29    0.87
 -10   7  -1   15.19    0.67
 -10   7  -1   14.85    1.14
  10  -7   1   14.47    0.68
  10  -7   1   15.72    1.09
  10  -7   1   17.08    1.27
  10  -7   1   15.15    0.81
  10  -7   1   13.51    0.95
 -11   7  -1    1.20    0.41
 -11   7  -1    1.28    0.80
 -11   7  -1    1.84    0.58
  11  -7   1    1.29    0.63
  11  -7   1    1.48    0.54
  11  -7   1    0.70    0.38
  11  -7   1    1.92    0.64
 -12   7  -1   13.39    1.07
 -12   7  -1   12.32    1.47
 -12   7  -1   13.41    0.86
  12  -7   1   11.68    1.34
  12  -7   1   12.28    0.88
  13   6  -1   32.31    1.49
  13   6  -1   29.09    1.81
  13   6  -1   27.74    1.38
  13   6  -1   33.49    2.07
 -13  -6   1   32.19    1.63
 -13  -6   1   22.63    1.79
 -13  -6   1   28.11    1.50
  12   6  -1   13.98    1.39
  12   6  -1   11.22    1.00
  12   6  -1   16.62    1.71
  12   6  -1    9.00    1.11
  12   6  -1   14.97    1.14
 -12  -6   1   14.31    1.41
 -12  -6   1   13.54    1.26
 -12  -6   1   13.62    1.54
 -12  -6   1   13.32    1.20
  11   6  -1   26.70    1.09
  11   6  -1   23.88    1.58
  11   6  -1   26.41    1.17
  11   6  -1   24.06    1.34
  11   6  -1   26.46    1.47
 -11  -6   1   25.33    1.23
 -11  -6   1   27.20    1.46
 -11  -6   1   25.19    1.27
 -11  -6   1   21.77    1.42
  10   6  -1   27.63    1.27
  10   6  -1   28.55    1.08
  10   6  -1   28.42    1.32
  10   6  -1   26.17    0.97
  10   6  -1   25.16    1.34
 -10  -6   1   27.26    1.31
 -10  -6   1   24.83    1.20
 -10  -6   1   27.79    1.16
 -10  -6   1   24.37    1.19
 -10  -6   1   27.45    1.32
   9   6  -1   10.41    0.87
   9   6  -1    9.84    0.73
   9   6  -1    9.04    0.92
   9   6  -1    9.45    0.65
   9   6  -1   10.32    0.87
  -9  -6   1    8.95    0.79
  -9  -6   1    8.94    0.93
  -9  -6   1    8.09    0.86
  -9  -6   1    7.47    0.86
  -9  -6   1    8.45    0.82
   8   6  -1   17.74    0.77
   8   6  -1   16.48    0.91
   8   6  -1   17.29    0.70
   8   6  -1   17.74    0.87
   8   6  -1   17.67    0.88
   8   6  -1   15.62    0.89
  -8  -6   1   15.80    0.94
  -8  -6   1   17.25    0.92
  -8  -6   1   16.59    0.83
  -8  -6   1   17.00    0.82
  -8  -6   1   16.52    0.79
  -8  -6   1   16.24    0.91
   7   6  -1   77.29    1.74
   7   6  -1   77.89    1.73
   7   6  -1   78.54    1.63
   7   6  -1   77.36    1.72
   7   6  -1   77.52    1.78
   7   6  -1   77.93    1.57
  -7  -6   1   79.71    1.77
  -7  -6   1   78.30    1.81
  -7  -6   1   79.00    1.67
  -7  -6   1   76.83    1.66
  -7  -6   1   78.66    1.65
  -7  -6   1   77.76    1.79
   6   6  -1   36.14    1.37
   6   6  -1   39.67    1.07
   6   6  -1   40.29    0.95
   6   6  -1   41.82    1.00
   6   6  -1   42.23    1.14
   6   6  -1   39.87    1.07
  -6  -6   1   39.97    1.09
  -6  -6   1   42.55    1.19
  -6  -6   1   41.10    1.00
  -6  -6   1   40.34    1.14
  -6  -6   1   41.14    1.03
  -6  -6   1   40.37    1.03
   5   6  -1   92.99    1.89
   5   6  -1   95.01    1.81
   5   6  -1   93.65    1.71
   5   6  -1   90.90    1.76
   5   6  -1   79.88    2.07
   5   6  -1   93.96    1.81
  -5  -6   1   95.27    1.84
  -5  -6   1   91.21    1.92
  -5  -6   1   90.88    1.77
  -5  -6   1   93.91    1.77
  -5  -6   1   93.15    1.89
  -5  -6   1   95.29    1.74
   4   6  -1   90.95    1.84
   4   6  -1   90.37    1.66
   4   6  -1   88.75    1.72
   4   6  -1   92.35    1.73
   4   6  -1   87.96    1.65
   4   6  -1   92.69    1.79
  -4  -6   1   90.19    1.70
  -4  -6   1   93.03    1.67
  -4  -6   1   90.88    1.69
  -4  -6   1   89.46    1.80
  -4  -6   1   92.94    1.75
  -4  -6   1   91.66    1.86
   3   6  -1   41.85    0.98
   3   6  -1   41.93    0.92
   3   6  -1   41.57    0.89
   3   6  -1   41.81    1.04
  -3  -6   1   42.23    0.98
  -3  -6   1   40.51    1.07
  -3  -6   1   42.21    0.87
  -3  -6   1   42.91    0.93
  -3  -6   1   41.55    0.90
  -3  -6   1   41.09    0.88
   2   6  -1   12.09    0.43
   2   6  -1   12.16    0.42
   2   6  -1   12.16    0.43
   2   6  -1   12.44    0.55
   2   6  -1   12.74    0.49
   2   6  -1   12.22    0.38
  -2  -6   1   12.54    0.47
  -2  -6   1   12.17    0.42
  -2  -6   1   12.25    0.42
  -2  -6   1   12.22    0.39
  -2  -6   1   12.53    0.40
  -2  -6   1   12.02    0.57
   1   6  -1   16.13    0.44
   1   6  -1   15.93    0.40
   1   6  -1   16.37    0.53
   1   6  -1   15.42    0.50
  -1  -6   1   16.58    0.46
  -1  -6   1   15.89    0.41
  -1  -6   1   16.05    0.61
  -1  -6   1   15.79    0.43
  -1  -6   1   16.06    0.44
  -1  -6   1   15.74    0.50
   0   6  -1   15.64    0.53
   0   6  -1   15.91    0.51
   0   6  -1   15.31    0.38
   0   6  -1   15.53    0.35
   0   6  -1   15.07    0.38
   0   6  -1   15.86    0.36
   0  -6   1   15.62    0.38
   0  -6   1   15.88    0.36
   0  -6   1   15.01    0.57
   0  -6   1   15.73    0.38
   0  -6   1   15.56    0.50
   0  -6   1   14.78    0.47
  -1   6  -1  111.09    2.06
   1  -6   1  113.79    2.02
   1  -6   1  113.00    2.01
   1  -6   1  114.65    2.09
   1  -6   1  112.75    1.81
   2  -6   1   52.08    1.12
   2  -6   1   51.32    1.12
   2  -6   1   51.42    1.07
   3  -6   1   44.86    1.01
   3  -6   1   45.41    1.07
   3  -6   1   43.88    1.00
   3  -6   1   43.81    0.98
   4  -6   1   -0.27    0.24
   4  -6   1    0.24    0.19
   4  -6   1    0.03    0.24
   4  -6   1    0.16    0.20
   4  -6   1    0.19    0.22
   4  -6   1    0.08    0.13
  -5   6  -1    0.17    0.16
  -5   6  -1    0.07    0.26
   5  -6   1    0.05    0.17
   5  -6   1    0.09    0.16
   5  -6   1    0.12    0.20
   5  -6   1    0.24    0.23
   5  -6   1    0.13    0.25
   5  -6   1   -0.04    0.26
   5  -6   1    0.12    0.13
  -6   6  -1   25.07    0.85
  -6   6  -1   22.91    0.62
  -6   6  -1   22.88    0.54
   6  -6   1   23.44    0.66
   6  -6   1   22.90    0.58
   6  -6   1   22.74    0.69
   6  -6   1   23.20    0.84
   6  -6   1   25.23    0.64
   6  -6   1   23.63    0.87
   6  -6   1   23.48    0.67
   6  -6   1   22.99    0.57
  -7   6  -1   -0.05    0.33
  -7   6  -1    0.27    0.20
  -7   6  -1    0.24    0.27
   7  -6   1    0.42    0.19
   7  -6   1    0.27    0.26
   7  -6   1    0.15    0.27
   7  -6   1    0.26    0.36
   7  -6   1    0.46    0.23
   7  -6   1    0.32    0.33
   7  -6   1    0.11    0.22
   7  -6   1    0.19    0.26
  -8   6  -1    0.75    0.33
  -8   6  -1    0.21    0.24
  -8   6  -1    0.18    0.41
   8  -6   1    0.66    0.27
   8  -6   1    0.43    0.24
   8  -6   1    0.44    0.26
   8  -6   1    0.67    0.28
   8  -6   1    0.88    0.39
   8  -6   1    0.97    0.34
   8  -6   1    0.19    0.33
   8  -6   1    0.21    0.43
  -9   6  -1    0.59    0.28
  -9   6  -1    0.24    0.52
  -9   6  -1   -0.26    0.38
   9  -6   1   -0.23    0.41
   9  -6   1    0.66    0.33
   9  -6   1    0.21    0.25
   9  -6   1    0.32    0.40
   9  -6   1    0.87    0.51
   9  -6   1    1.10    0.40
 -10   6  -1   25.89    1.03
 -10   6  -1   26.32    0.85
 -10   6  -1   27.77    1.29
  10  -6   1   27.66    1.10
  10  -6   1   27.14    0.97
  10  -6   1   27.77    1.37
  10  -6   1   25.32    0.85
  10  -6   1   27.62    1.22
 -11   6  -1   13.87    1.00
 -11   6  -1   13.85    0.75
 -11   6  -1   13.47    1.30
  11  -6   1   14.69    0.75
  11  -6   1   15.62    1.13
  11  -6   1   12.98    0.95
  11  -6   1   15.12    1.14
 -12   6  -1   14.34    1.49
 -12   6  -1   17.59    1.13
 -12   6  -1   13.98    0.88
  12  -6   1   16.27    0.90
  12  -6   1   16.89    1.31
  13   5  -1    9.04    1.09
  13   5  -1    7.60    1.05
  13   5  -1    7.13    0.86
  13   5  -1    8.42    1.41
 -13  -5   1    7.69    0.82
 -13  -5   1    8.36    1.10
 -13  -5   1    9.28    0.96
  12   5  -1    1.60    0.80
  12   5  -1    1.68    0.53
  12   5  -1    0.57    0.58
  12   5  -1    1.11    0.93
  12   5  -1    2.86    1.00
 -12  -5   1    0.97    0.81
 -12  -5   1    1.17    0.63
 -12  -5   1    0.30    0.70
 -12  -5   1    1.64    0.67
  11   5  -1    0.15    0.44
  11   5  -1   -0.34    0.66
  11   5  -1   -0.30    0.57
  11   5  -1    0.18    0.68
  11   5  -1   -0.10    0.46
 -11  -5   1    0.03    0.72
 -11  -5   1   -0.64    0.50
 -11  -5   1   -0.77    0.53
 -11  -5   1    1.48    0.68
  10   5  -1   10.05    1.04
  10   5  -1   11.83    0.74
  10   5  -1   10.93    0.96
  10   5  -1    9.99    0.81
  10   5  -1   11.27    1.10
 -10  -5   1   12.34    0.92
 -10  -5   1   11.53    1.00
 -10  -5   1   10.97    1.03
 -10  -5   1   10.45    1.24
 -10  -5   1   11.05    0.86
   9   5  -1   29.23    1.19
   9   5  -1   31.81    0.95
   9   5  -1   30.87    1.00
   9   5  -1   31.68    1.13
  -9  -5   1   30.95    1.10
  -9  -5   1   29.02    1.21
  -9  -5   1   29.55    1.10
  -9  -5   1   28.25    1.04
   8   5  -1    8.28    0.75
   8   5  -1    7.67    0.52
   8   5  -1    7.48    0.68
   8   5  -1    8.24    0.73
   8   5  -1    7.43    0.57
  -8  -5   1    8.11    0.72
  -8  -5   1    6.83    0.70
  -8  -5   1    7.61    0.67
  -8  -5   1    7.73    0.62
  -8  -5   1    7.96    0.74
   7   5  -1   -0.03    0.31
   7   5  -1    0.28    0.22
   7   5  -1    0.35    0.31
   7   5  -1   -0.21    0.33
   7   5  -1    0.12    0.26
   7   5  -1   -0.16    0.30
  -7  -5   1    0.57    0.33
  -7  -5   1    0.02    0.33
  -7  -5   1   -0.14    0.30
  -7  -5   1    0.18    0.28
  -7  -5   1   -0.11    0.28
  -7  -5   1    0.51    0.30
   6   5  -1  146.24    2.68
   6   5  -1  147.71    2.68
   6   5  -1  147.62    2.75
   6   5  -1  145.86    2.59
   6   5  -1  150.11    2.71
   6   5  -1  148.25    2.56
  -6  -5   1  145.79    2.77
  -6  -5   1  134.21    2.74
  -6  -5   1  151.29    2.66
  -6  -5   1  148.48    2.74
  -6  -5   1  148.78    2.70
  -6  -5   1  146.15    2.64
   5   5  -1  245.50    4.11
   5   5  -1  250.52    4.22
   5   5  -1  248.65    4.21
   5   5  -1  254.37    4.29
   5   5  -1  256.09    4.28
   5   5  -1  250.31    4.15
  -5  -5   1  251.42    4.15
  -5  -5   1  250.80    4.19
  -5  -5   1  251.41    4.18
  -5  -5   1  248.07    4.31
  -5  -5   1  250.38    4.30
  -5  -5   1  254.52    4.24
   4   5  -1   38.16    0.90
   4   5  -1   37.91    0.82
   4   5  -1   37.50    0.96
   4   5  -1   39.35    0.85
   4   5  -1   38.25    0.94
   4   5  -1   37.66    0.89
  -4  -5   1   39.28    0.96
  -4  -5   1   39.08    0.89
  -4  -5   1   37.75    0.86
  -4  -5   1   39.50    0.84
  -4  -5   1   37.84    0.90
  -4  -5   1   37.72    0.99
   3   5  -1   26.41    0.66
   3   5  -1   26.74    0.62
   3   5  -1   26.59    0.76
   3   5  -1   27.13    0.72
   3   5  -1   26.57    0.67
  -3  -5   1   26.70    0.72
  -3  -5   1   27.19    0.78
  -3  -5   1   26.49    0.65
  -3  -5   1   27.10    0.68
  -3  -5   1   26.42    0.64
  -3  -5   1   27.20    0.62
   2   5  -1  138.25    2.42
   2   5  -1  136.72    2.28
   2   5  -1  137.34    2.36
   2   5  -1  133.96    2.24
   2   5  -1  134.63    2.28
  -2  -5   1  133.66    2.29
  -2  -5   1  135.79    2.25
  -2  -5   1  132.66    2.26
  -2  -5   1  134.09    2.43
  -2  -5   1  135.24    2.25
  -2  -5   1  135.17    2.34
   1   5  -1    4.82    0.28
   1   5  -1    4.38    0.31
   1   5  -1    3.76    0.21
   1   5  -1    4.34    0.25
   1   5  -1    3.73    0.24
  -1  -5   1    3.53    0.22
  -1  -5   1    3.76    0.24
  -1  -5   1    3.86    0.25
  -1  -5   1    4.45    0.36
  -1  -5   1    4.25    0.25
  -1  -5   1    4.73    0.30
   0   5  -1    8.48    0.36
   0   5  -1    8.46    0.26
   0   5  -1    8.26    0.25
   0   5  -1    8.19    0.25
   0   5  -1    8.06    0.36
   0   5  -1    8.56    0.23
   0  -5   1    8.34    0.26
   0  -5   1    8.25    0.33
   0  -5   1    8.43    0.25
   0  -5   1    8.49    0.42
   0  -5   1    8.04    0.35
   0  -5   1    8.53    0.24
  -1   5  -1   24.86    0.65
   1  -5   1   24.72    0.44
   1  -5   1   24.43    0.66
   1  -5   1   23.93    0.61
   1  -5   1   24.62    0.62
   2  -5   1   43.08    0.96
   2  -5   1   44.24    0.94
   2  -5   1   43.05    0.92
   3  -5   1    2.03    0.25
   3  -5   1    1.55    0.26
   3  -5   1    2.03    0.23
   3  -5   1    2.11    0.23
  -4   5  -1    2.05    0.27
  -4   5  -1    1.92    0.17
   4  -5   1    2.14    0.28
   4  -5   1    2.01    0.24
   4  -5   1    2.21    0.23
   4  -5   1    1.88    0.18
   4  -5   1    1.58    0.27
   4  -5   1    1.57    0.16
   4  -5   1    1.96    0.18
  -5   5  -1   12.11    0.34
  -5   5  -1   11.78    0.41
  -5   5  -1   11.26    0.56
   5  -5   1   11.77    0.47
   5  -5   1   12.02    0.58
   5  -5   1   12.12    0.37
   5  -5   1   11.60    0.44
   5  -5   1   11.65    0.57
   5  -5   1   11.87    0.36
   5  -5   1   10.99    0.41
   5  -5   1   12.02    0.42
  -6   5  -1    3.47    0.37
  -6   5  -1    2.59    0.36
  -6   5  -1    2.72    0.28
   6  -5   1    3.29    0.31
   6  -5   1    2.98    0.37
   6  -5   1    2.84    0.28
   6  -5   1    3.25    0.37
   6  -5   1    2.73    0.28
   6  -5   1    2.63    0.31
   6  -5   1    3.14    0.35
  -7   5  -1    1.65    0.40
  -7   5  -1    1.67    0.31
  -7   5  -1    1.26    0.23
   7  -5   1    1.69    0.38
   7  -5   1    1.90    0.23
   7  -5   1    1.59    0.30
   7  -5   1    1.88    0.27
   7  -5   1    1.70    0.23
   7  -5   1    1.30    0.39
   7  -5   1    1.44    0.28
   7  -5   1    1.30    0.25
  -8   5  -1    0.89    0.39
  -8   5  -1    1.42    0.35
  -8   5  -1    1.04    0.26
   8  -5   1    1.17    0.38
   8  -5   1    0.91    0.44
   8  -5   1    1.04    0.24
   8  -5   1    0.90    0.35
   8  -5   1    0.83    0.29
   8  -5   1    0.81    0.31
  -9   5  -1    7.72    0.68
  -9   5  -1    8.06    0.84
  -9   5  -1    7.74    0.53
   9  -5   1    8.11    0.76
   9  -5   1    7.32    0.86
   9  -5   1    7.51    0.70
   9  -5   1    7.66    0.51
   9  -5   1    7.83    0.67
   9  -5   1    6.91    0.58
 -10   5  -1   16.69    0.91
 -10   5  -1   17.04    0.73
 -10   5  -1   16.25    1.10
  10  -5   1   16.33    0.97
  10  -5   1   17.77    0.74
  10  -5   1   16.26    0.99
  10  -5   1   17.41    1.15
  10  -5   1   18.52    0.85
  10  -5   1   17.55    1.07
 -11   5  -1    5.49    0.66
 -11   5  -1    2.84    0.77
 -11   5  -1    5.90    0.68
  11  -5   1    4.04    0.60
  11  -5   1    4.18    0.66
  11  -5   1    4.90    0.48
  11  -5   1    4.83    0.74
 -12   5  -1    3.41    0.53
 -12   5  -1    2.56    0.83
 -12   5  -1    4.72    0.72
  12  -5   1    4.14    0.71
  12  -5   1    2.87    0.72
  12  -5   1    3.12    0.49
  13   4  -1    2.81    0.72
  13   4  -1    2.70    0.66
  13   4  -1    1.84    0.89
 -13  -4   1    1.42    0.96
 -13  -4   1    1.48    0.78
 -13  -4   1    1.24    0.66
  12   4  -1    4.14    0.73
  12   4  -1    4.63    0.81
  12   4  -1    5.24    0.67
  12   4  -1    3.46    0.92
  12   4  -1    3.74    0.97
 -12  -4   1    4.43    0.88
 -12  -4   1    3.19    0.84
 -12  -4   1    4.90    0.72
 -12  -4   1    4.57    0.62
  11   4  -1   28.28    1.29
  11   4  -1   28.30    1.10
  11   4  -1   26.77    1.07
  11   4  -1   27.93    1.54
  11   4  -1   29.29    1.42
 -11  -4   1   28.89    1.11
 -11  -4   1   30.66    1.40
 -11  -4   1   29.80    1.21
 -11  -4   1   29.10    1.40
 -11  -4   1   32.24    1.47
  10   4  -1    0.81    0.50
  10   4  -1    0.13    0.44
  10   4  -1   -0.22    0.57
  10   4  -1    0.75    0.40
  10   4  -1    0.56    0.35
 -10  -4   1   -0.06    0.43
 -10  -4   1    0.17    0.51
 -10  -4   1    0.53    0.53
 -10  -4   1    1.32    0.55
 -10  -4   1    0.23    0.42
   9   4  -1    5.10    0.64
   9   4  -1    3.72    0.57
   9   4  -1    3.93    0.41
   9   4  -1    4.14    0.50
   9   4  -1    4.46    0.45
  -9  -4   1    5.00    0.50
  -9  -4   1    4.84    0.52
  -9  -4   1    4.29    0.60
  -9  -4   1    5.00    0.58
  -9  -4   1    4.56    0.55
   8   4  -1   -0.04    0.25
   8   4  -1    0.14    0.26
   8   4  -1   -0.10    0.33
   8   4  -1    0.53    0.38
   8   4  -1    0.47    0.31
   8   4  -1   -0.07    0.33
  -8  -4   1    0.60    0.33
  -8  -4   1    0.91    0.42
  -8  -4   1    0.06    0.36
  -8  -4   1   -0.14    0.36
  -8  -4   1    0.35    0.33
   7   4  -1    2.33    0.34
   7   4  -1    2.54    0.36
   7   4  -1    2.22    0.32
   7   4  -1    1.62    0.37
   7   4  -1    2.05    0.29
   7   4  -1    1.85    0.35
  -7  -4   1    2.26    0.35
  -7  -4   1    2.44    0.43
  -7  -4   1    2.33    0.37
  -7  -4   1    2.26    0.33
  -7  -4   1    2.01    0.35
   6   4  -1    9.32    0.55
   6   4  -1   10.95    0.59
   6   4  -1   10.62    0.45
   6   4  -1   10.15    0.55
   6   4  -1   10.46    0.54
   6   4  -1   10.35    0.48
  -6  -4   1   10.40    0.56
  -6  -4   1   10.85    0.56
  -6  -4   1   10.68    0.59
  -6  -4   1   10.76    0.53
  -6  -4   1   11.17    0.52
  -6  -4   1    9.88    0.52
   5   4  -1    4.93    0.42
   5   4  -1    5.41    0.43
   5   4  -1    6.11    0.44
   5   4  -1    5.74    0.37
   5   4  -1    5.71    0.44
   5   4  -1    6.34    0.35
  -5  -4   1    5.88    0.46
  -5  -4   1    5.91    0.40
  -5  -4   1    6.42    0.46
  -5  -4   1    5.89    0.37
  -5  -4   1    5.42    0.40
  -5  -4   1    5.00    0.42
   4   4  -1  149.44    2.58
   4   4  -1  130.17    2.59
   4   4  -1  147.32    2.53
   4   4  -1  143.62    2.51
   4   4  -1  146.50    2.56
   4   4  -1  146.07    2.44
  -4  -4   1  143.30    2.53
  -4  -4   1  146.08    2.59
  -4  -4   1  145.49    2.49
  -4  -4   1  149.37    2.59
  -4  -4   1  149.60    2.54
  -4  -4   1  143.53    2.45
   3   4  -1    2.01    0.21
   3   4  -1    1.78    0.21
   3   4  -1    1.70    0.20
   3   4  -1    2.04    0.23
   3   4  -1    1.82    0.24
   3   4  -1    1.68    0.17
  -3  -4   1    2.55    0.23
  -3  -4   1    1.87    0.21
  -3  -4   1    2.27    0.27
  -3  -4   1    2.48    0.31
  -3  -4   1    1.79    0.18
  -3  -4   1    1.97    0.26
   2   4  -1   69.87    1.29
   2   4  -1   68.58    1.34
   2   4  -1   67.84    1.21
   2   4  -1   69.33    1.25
  -2  -4   1   68.71    1.23
  -2  -4   1   67.41    1.21
  -2  -4   1   70.07    1.35
  -2  -4   1   69.19    1.21
  -2  -4   1   67.68    1.25
  -2  -4   1   70.28    1.30
   1   4  -1  121.57    2.02
   1   4  -1  118.77    1.98
   1   4  -1  121.83    1.96
   1   4  -1  121.06    1.99
   1   4  -1  121.75    2.06
  -1  -4   1  119.82    1.98
  -1  -4   1  122.18    1.99
  -1  -4   1  121.60    2.00
  -1  -4   1  123.36    2.06
  -1  -4   1  117.73    1.97
  -1  -4   1  120.26    2.12
   0   4  -1   38.77    0.79
   0   4  -1   39.41    0.69
   0   4  -1   38.79    0.67
   0   4  -1   38.54    0.79
   0   4  -1   39.64    0.69
   0  -4   1   38.88    0.79
   0  -4   1   39.42    0.76
   0  -4   1   37.74    0.69
   0  -4   1   40.47    0.85
   0  -4   1   39.99    0.70
   0  -4   1   39.14    0.69
   1  -4   1  186.31    3.04
   1  -4   1  183.70    3.06
   1  -4   1  182.90    3.03
   2  -4   1  161.31    2.69
   2  -4   1  159.60    2.72
  -3   4  -1  446.14    7.09
   3  -4   1  441.35    7.03
   3  -4   1  447.20    7.09
   3  -4   1  441.23    7.11
  -4   4  -1   10.38    0.34
  -4   4  -1   10.75    0.30
  -4   4  -1   10.81    0.48
   4  -4   1   10.43    0.48
   4  -4   1    9.93    0.40
   4  -4   1   10.61    0.31
   4  -4   1   10.94    0.48
   4  -4   1   10.71    0.33
  -5   4  -1   52.41    1.18
  -5   4  -1   52.31    0.96
  -5   4  -1   51.68    1.01
   5  -4   1   50.09    1.02
   5  -4   1   50.73    1.17
   5  -4   1   51.96    1.00
   5  -4   1   52.67    0.98
   5  -4   1   52.37    0.97
   5  -4   1   51.17    1.16
  -6   4  -1   18.09    0.51
  -6   4  -1   17.54    0.70
  -6   4  -1   17.67    0.57
   6  -4   1   18.60    0.73
   6  -4   1   17.58    0.52
   6  -4   1   18.83    0.54
   6  -4   1   17.40    0.49
   6  -4   1   18.37    0.68
   6  -4   1   17.48    0.55
  -7   4  -1   62.80    1.31
  -7   4  -1   62.20    1.49
  -7   4  -1   62.67    1.23
   7  -4   1   63.06    1.50
   7  -4   1   62.22    1.26
   7  -4   1   62.56    1.29
   7  -4   1   63.29    1.22
   7  -4   1   61.84    1.17
   7  -4   1   61.21    1.44
  -8   4  -1    0.56    0.32
  -8   4  -1    0.54    0.24
  -8   4  -1    0.34    0.37
   8  -4   1    0.41    0.30
   8  -4   1    0.32    0.41
   8  -4   1    1.09    0.29
   8  -4   1    0.94    0.34
   8  -4   1    0.44    0.24
   8  -4   1    0.16    0.32
  -9   4  -1   24.04    0.91
  -9   4  -1   23.56    1.05
   9  -4   1   24.15    0.82
   9  -4   1   24.34    0.89
   9  -4   1   23.66    0.97
   9  -4   1   22.38    1.01
   9  -4   1   22.48    1.35
   9  -4   1   24.33    1.07
 -10   4  -1   17.35    0.75
 -10   4  -1   17.39    1.08
 -10   4  -1   17.16    0.92
  10  -4   1   17.59    0.96
  10  -4   1   16.75    1.11
  10  -4   1   18.33    0.74
  10  -4   1   16.60    0.84
  10  -4   1   19.00    1.02
  10  -4   1   15.11    0.95
 -11   4  -1   13.01    1.17
 -11   4  -1   12.45    0.96
 -11   4  -1   12.10    0.76
  11  -4   1   12.55    1.09
  11  -4   1   12.60    0.93
  11  -4   1   11.75    1.13
  11  -4   1   12.41    0.73
  11  -4   1   12.28    0.97
 -12   4  -1    0.76    0.65
 -12   4  -1    0.45    0.83
 -12   4  -1    1.45    0.47
  12  -4   1    1.29    0.63
  12  -4   1    1.61    0.80
  12  -4   1    1.63    0.44
  12  -4   1    0.65    0.61
 -13   4  -1    2.45    0.59
 -13   4  -1    3.42    1.00
  13  -4   1    3.23    0.64
  13  -4   1    2.96    0.78
  13   3  -1   10.56    1.08
  13   3  -1    8.51    0.84
  13   3  -1    8.17    0.78
 -13  -3   1   10.19    0.96
 -13  -3   1    9.39    1.13
  12   3  -1    1.45    0.74
  12   3  -1   -0.20    0.84
  12   3  -1   -0.58    0.50
  12   3  -1    0.46    0.55
  12   3  -1    1.25    1.46
 -12  -3   1    0.18    0.47
 -12  -3   1    0.22    0.74
 -12  -3   1   -0.28    0.57
  11   3  -1    1.64    0.46
  11   3  -1    1.66    0.57
  11   3  -1    1.55    0.46
  11   3  -1    1.06    0.66
  11   3  -1    2.07    0.70
 -11  -3   1    0.86    0.62
 -11  -3   1    0.48    0.61
 -11  -3   1    1.62    0.61
 -11  -3   1    1.56    0.45
 -11  -3   1    1.20    0.49
  10   3  -1    4.14    0.49
  10   3  -1    4.09    0.68
  10   3  -1    3.82    0.58
  10   3  -1    3.58    0.48
  10   3  -1    3.28    0.65
 -10  -3   1    3.69    0.47
 -10  -3   1    4.04    0.60
 -10  -3   1    4.12    0.52
 -10  -3   1    4.82    0.66
 -10  -3   1    3.98    0.72
   9   3  -1    5.75    0.54
   9   3  -1    4.62    0.57
   9   3  -1    4.01    0.48
   9   3  -1    5.68    0.58
   9   3  -1    6.14    0.72
  -9  -3   1    6.45    0.63
  -9  -3   1    7.13    0.67
  -9  -3   1    6.61    0.61
  -9  -3   1    6.06    0.65
  -9  -3   1    5.11    0.52
   8   3  -1    0.96    0.26
   8   3  -1    0.37    0.38
   8   3  -1    1.02    0.38
   8   3  -1    1.11    0.28
   8   3  -1    0.71    0.35
   8   3  -1    1.09    0.27
  -8  -3   1    1.01    0.33
  -8  -3   1    0.86    0.35
  -8  -3   1    0.83    0.36
  -8  -3   1    0.82    0.32
  -8  -3   1    0.84    0.39
   7   3  -1    1.71    0.34
   7   3  -1    1.39    0.32
   7   3  -1    1.82    0.29
   7   3  -1    1.43    0.28
   7   3  -1    1.68    0.38
   7   3  -1    1.53    0.27
  -7  -3   1    1.98    0.34
  -7  -3   1    1.75    0.38
  -7  -3   1    1.45    0.33
  -7  -3   1    1.43    0.27
  -7  -3   1    1.42    0.30
   6   3  -1    0.10    0.23
   6   3  -1    0.03    0.24
   6   3  -1   -0.05    0.20
   6   3  -1    0.19    0.18
   6   3  -1   -0.30    0.17
  -6  -3   1   -0.01    0.24
  -6  -3   1    0.02    0.22
  -6  -3   1    0.15    0.22
  -6  -3   1   -0.21    0.21
  -6  -3   1   -0.13    0.22
   5   3  -1   19.05    0.56
   5   3  -1   18.71    0.59
   5   3  -1   18.69    0.52
   5   3  -1   18.13    0.61
   5   3  -1   18.32    0.61
   5   3  -1   19.55    0.65
  -5  -3   1   18.44    0.63
  -5  -3   1   18.63    0.56
  -5  -3   1   17.95    0.65
  -5  -3   1   19.40    0.62
  -5  -3   1   18.95    0.59
  -5  -3   1   18.42    0.58
   4   3  -1    3.61    0.33
   4   3  -1    4.28    0.35
   4   3  -1    3.89    0.30
   4   3  -1    3.88    0.34
   4   3  -1    4.05    0.26
   4   3  -1    4.25    0.35
  -4  -3   1    4.00    0.32
  -4  -3   1    3.74    0.36
  -4  -3   1    3.92    0.33
  -4  -3   1    3.93    0.37
  -4  -3   1    3.93    0.28
  -4  -3   1    3.99    0.32
   3   3  -1    0.10    0.14
   3   3  -1    0.30    0.16
   3   3  -1    0.27    0.16
   3   3  -1    0.02    0.14
   3   3  -1    0.11    0.11
   3   3  -1    0.20    0.11
  -3  -3   1    0.07    0.14
  -3  -3   1    0.20    0.13
  -3  -3   1    0.33    0.13
  -3  -3   1    0.14    0.12
  -3  -3   1   -0.07    0.16
  -3  -3   1    0.23    0.17
   2   3  -1  212.38    3.48
   2   3  -1  218.21    3.52
   2   3  -1  218.68    3.54
   2   3  -1  210.95    3.43
   2   3  -1  214.80    3.47
  -2  -3   1  215.99    3.51
  -2  -3   1  218.49    3.47
  -2  -3   1  219.38    3.54
  -2  -3   1  210.89    3.45
  -2  -3   1  213.32    3.48
  -2  -3   1  216.49    3.43
   1   3  -1  109.98    1.84
   1   3  -1  113.95    1.89
   1   3  -1  112.97    1.84
   1   3  -1  110.14    1.81
   1   3  -1  115.51    1.93
  -1  -3   1  114.68    1.93
  -1  -3   1  107.96    1.82
  -1  -3   1  112.02    1.83
  -1  -3   1  111.60    1.84
  -1  -3   1  113.56    1.89
  -1  -3   1  111.43    1.82
   0   3  -1  170.40    2.70
   0   3  -1  172.28    2.70
   0   3  -1  171.55    2.70
   0   3  -1  171.88    2.68
   0   3  -1  170.96    2.79
   0   3  -1  173.61    2.77
   0  -3   1  169.65    2.70
   0  -3   1  173.49    2.79
   0  -3   1  171.05    2.76
   0  -3   1  171.98    2.71
   0  -3   1  170.03    2.69
   0  -3   1  174.72    2.83
   1  -3   1  202.35    3.27
  -2   3  -1   24.77    0.58
   2  -3   1   24.37    0.55
   2  -3   1   24.83    0.58
  -3   3  -1   64.82    1.25
  -3   3  -1   65.89    1.09
  -3   3  -1   65.43    1.12
   3  -3   1   65.76    1.10
   3  -3   1   64.15    1.25
   3  -3   1   65.52    1.18
   3  -3   1   66.55    1.26
   3  -3   1   66.52    1.11
  -4   3  -1   27.76    0.72
  -4   3  -1   28.43    0.57
   4  -3   1   27.84    0.57
   4  -3   1   27.50    0.62
   4  -3   1   28.46    0.58
   4  -3   1   26.95    0.71
   4  -3   1   27.04    0.73
   4  -3   1   28.12    0.59
  -5   3  -1   32.23    0.69
  -5   3  -1   32.90    0.87
  -5   3  -1   33.07    0.86
   5  -3   1   32.92    0.87
   5  -3   1   32.23    0.68
   5  -3   1   32.49    0.71
   5  -3   1   32.74    0.71
   5  -3   1   32.37    0.69
   5  -3   1   32.79    0.84
  -6   3  -1   98.90    1.75
  -6   3  -1   91.01    2.09
  -6   3  -1  101.33    1.97
   6  -3   1  100.13    1.80
   6  -3   1   98.85    1.92
   6  -3   1  101.35    1.98
   6  -3   1   99.62    1.70
   6  -3   1   98.07    1.74
   6  -3   1   99.94    1.78
  -7   3  -1   13.36    0.69
  -7   3  -1   14.52    0.72
  -7   3  -1   14.42    0.53
   7  -3   1   15.04    0.67
   7  -3   1   13.75    0.43
   7  -3   1   14.62    0.51
   7  -3   1   13.87    0.55
   7  -3   1   14.10    0.56
   7  -3   1   14.31    0.73
  -8   3  -1   35.07    1.00
  -8   3  -1   33.96    0.88
  -8   3  -1   34.69    1.13
  -8   3  -1   36.28    1.13
   8  -3   1   34.59    0.93
   8  -3   1   34.14    0.85
   8  -3   1   34.27    1.12
   8  -3   1   34.62    0.95
   8  -3   1   34.48    1.02
  -9   3  -1    2.74    0.50
  -9   3  -1    3.71    0.58
  -9   3  -1    3.27    0.36
  -9   3  -1    3.16    0.49
   9  -3   1    2.62    0.40
   9  -3   1    2.32    0.31
   9  -3   1    3.41    0.55
   9  -3   1    2.83    0.42
   9  -3   1    3.40    0.46
 -10   3  -1   60.32    1.39
 -10   3  -1   59.47    1.76
 -10   3  -1   60.23    1.54
 -10   3  -1   58.22    1.79
  10  -3   1   56.95    1.52
  10  -3   1   60.35    1.35
  10  -3   1   59.28    1.46
  10  -3   1   61.36    1.57
  10  -3   1   57.46    1.61
  10  -3   1   60.05    1.74
 -11   3  -1   10.65    1.10
 -11   3  -1   11.07    0.94
 -11   3  -1   11.20    0.80
  11  -3   1   11.34    1.17
  11  -3   1    9.89    1.13
  11  -3   1   10.93    0.93
  11  -3   1   10.73    0.73
  11  -3   1   11.97    0.96
 -12   3  -1    2.19    0.50
 -12   3  -1    1.32    0.77
 -12   3  -1    0.75    0.68
  12  -3   1    1.48    0.57
  12  -3   1    1.84    0.51
  12  -3   1    2.17    0.68
  12  -3   1    1.69    0.80
 -13   3  -1    0.38    0.60
 -13   3  -1    0.13    0.89
  13  -3   1   -0.12    0.65
  13  -3   1    0.28    0.48
  13   2  -1    1.21    0.59
  13   2  -1    1.00    0.73
  13   2  -1    0.87    0.62
 -13  -2   1    0.78    0.66
 -13  -2   1    0.14    0.90
  12   2  -1    6.80    1.05
  12   2  -1    4.03    0.56
  12   2  -1    3.45    0.77
  12   2  -1    3.81    0.93
  12   2  -1    4.98    0.63
 -12  -2   1    3.92    0.64
 -12  -2   1    3.63    0.78
 -12  -2   1    4.61    0.47
  11   2  -1    4.85    0.65
  11   2  -1    5.23    0.58
  11   2  -1    4.58    0.78
  11   2  -1    5.47    0.56
  11   2  -1    3.90    0.75
  11   2  -1    5.44    0.74
 -11  -2   1    6.10    0.67
 -11  -2   1    6.68    0.83
 -11  -2   1    5.73    0.64
 -11  -2   1    5.72    0.78
 -11  -2   1    4.82    0.74
  10   2  -1    0.59    0.36
  10   2  -1    1.10    0.47
  10   2  -1    0.14    0.37
  10   2  -1    0.26    0.48
  10   2  -1    0.42    0.54
 -10  -2   1   -0.48    0.32
 -10  -2   1   -0.25    0.40
 -10  -2   1    1.25    0.53
 -10  -2   1    0.65    0.41
 -10  -2   1    0.18    0.48
   9   2  -1   93.36    2.14
   9   2  -1   93.10    2.01
   9   2  -1   93.29    1.91
   9   2  -1   95.49    1.91
  -9  -2   1   95.36    2.08
  -9  -2   1   92.69    2.06
  -9  -2   1   95.53    1.96
  -9  -2   1   91.38    2.14
  -9  -2   1   93.57    1.81
   8   2  -1   15.55    1.13
   8   2  -1   16.34    0.60
   8   2  -1   17.82    0.67
   8   2  -1   16.87    0.75
   8   2  -1   17.05    0.68
  -8  -2   1   16.91    0.64
  -8  -2   1   17.77    0.81
  -8  -2   1   16.81    0.76
  -8  -2   1   16.92    0.71
  -8  -2   1   15.58    0.82
   7   2  -1    7.25    0.52
   7   2  -1    6.92    0.42
   7   2  -1    7.57    0.53
   7   2  -1    6.86    0.44
   7   2  -1    8.10    0.60
   7   2  -1    7.21    0.45
  -7  -2   1    7.32    0.48
  -7  -2   1    6.87    0.57
  -7  -2   1    7.17    0.46
  -7  -2   1    8.38    0.55
  -7  -2   1    6.29    0.53
   6   2  -1    0.43    0.23
   6   2  -1    0.38    0.18
   6   2  -1    0.60    0.18
   6   2  -1    1.10    0.27
   6   2  -1    0.73    0.23
   6   2  -1    0.75    0.20
  -6  -2   1    1.24    0.24
  -6  -2   1    1.03    0.23
  -6  -2   1    0.82    0.21
  -6  -2   1    0.47    0.26
  -6  -2   1    0.85    0.28
   5   2  -1    3.28    0.28
   5   2  -1    2.99    0.30
   5   2  -1    3.43    0.36
   5   2  -1    3.33    0.31
   5   2  -1    4.00    0.40
   5   2  -1    2.70    0.27
  -5  -2   1    3.40    0.33
  -5  -2   1    3.37    0.33
  -5  -2   1    3.16    0.33
  -5  -2   1    3.37    0.33
   4   2  -1   29.25    0.70
   4   2  -1   28.14    0.63
   4   2  -1   29.12    0.75
   4   2  -1   28.56    0.69
   4   2  -1   28.54    0.66
  -4  -2   1   29.30    0.69
  -4  -2   1   29.08    0.68
  -4  -2   1   28.66    0.66
  -4  -2   1   29.38    0.72
  -4  -2   1   28.15    0.67
   3   2  -1    3.02    0.25
   3   2  -1    3.39    0.26
   3   2  -1    3.39    0.29
   3   2  -1    3.19    0.20
   3   2  -1    3.11    0.26
  -3  -2   1    3.50    0.23
  -3  -2   1    3.02    0.24
  -3  -2   1    3.06    0.26
  -3  -2   1    3.29    0.27
  -3  -2   1    3.35    0.30
   2   2  -1    0.19    0.13
   2   2  -1    0.29    0.13
   2   2  -1    0.09    0.08
   2   2  -1   -0.01    0.09
   2   2  -1    0.00    0.11
   2   2  -1    0.10    0.12
  -2  -2   1    0.14    0.11
  -2  -2   1    0.02    0.10
  -2  -2   1    0.20    0.13
  -2  -2   1    0.19    0.14
  -2  -2   1    0.06    0.09
  -2  -2   1    0.04    0.11
   1   2  -1   11.26    0.34
   1   2  -1   11.68    0.27
   1   2  -1   11.37    0.30
   1   2  -1   11.87    0.33
  -1  -2   1   11.06    0.29
  -1  -2   1   11.14    0.37
  -1  -2   1   11.49    0.35
  -1  -2   1   11.48    0.27
  -1  -2   1   11.38    0.30
  -1  -2   1   11.17    0.26
   0   2  -1   38.24    0.71
   0   2  -1   38.01    0.63
   0   2  -1   39.07    0.64
   0   2  -1   37.00    0.62
   0   2  -1   38.03    0.68
   0  -2   1   37.47    0.62
   0  -2   1   38.61    0.71
   0  -2   1   37.92    0.67
   0  -2   1   38.16    0.63
   0  -2   1   38.58    0.64
   1  -2   1    4.89    0.23
   1  -2   1    4.99    0.23
  -2   2  -1  131.56    2.12
  -2   2  -1  135.18    2.13
  -2   2  -1  137.56    2.24
   2  -2   1  132.91    2.12
   2  -2   1  131.63    2.12
   2  -2   1  136.31    2.24
   2  -2   1  136.60    2.19
   2  -2   1  134.81    2.23
  -3   2  -1   22.51    0.49
  -3   2  -1   23.57    0.49
  -3   2  -1   23.87    0.59
  -3   2  -1   23.31    0.47
  -3   2  -1   23.20    0.58
   3  -2   1   22.75    0.58
   3  -2   1   23.39    0.48
   3  -2   1   23.33    0.46
   3  -2   1   23.18    0.57
   3  -2   1   23.57    0.51
   3  -2   1   23.12    0.47
  -4   2  -1    1.26    0.15
  -4   2  -1    0.94    0.20
  -4   2  -1    0.60    0.15
  -4   2  -1    0.76    0.16
  -4   2  -1    0.51    0.18
   4  -2   1    0.99    0.16
   4  -2   1    0.70    0.17
   4  -2   1    0.97    0.13
   4  -2   1    0.88    0.14
   4  -2   1    0.93    0.20
   4  -2   1    0.99    0.15
  -5   2  -1  184.19    3.23
  -5   2  -1  189.21    3.22
  -5   2  -1  184.62    3.06
  -5   2  -1  185.91    3.10
   5  -2   1  184.91    3.18
   5  -2   1  187.11    3.08
   5  -2   1  190.31    3.24
   5  -2   1  189.18    3.02
   5  -2   1  183.25    3.04
   5  -2   1  186.11    3.08
  -6   2  -1    3.51    0.37
  -6   2  -1    2.81    0.33
  -6   2  -1    3.01    0.30
  -6   2  -1    2.88    0.30
  -6   2  -1    2.86    0.34
   6  -2   1    3.66    0.34
   6  -2   1    3.00    0.28
   6  -2   1    2.96    0.26
   6  -2   1    2.90    0.37
   6  -2   1    3.11    0.31
   6  -2   1    2.88    0.32
  -7   2  -1  150.71    2.82
  -7   2  -1  146.23    2.66
  -7   2  -1  141.41    2.62
  -7   2  -1  150.21    2.60
  -7   2  -1  152.36    2.80
   7  -2   1  151.73    2.82
   7  -2   1  152.69    2.74
   7  -2   1  153.18    2.65
   7  -2   1  147.14    2.57
   7  -2   1  150.00    2.47
   7  -2   1  154.20    2.64
  -8   2  -1    4.57    0.52
  -8   2  -1    4.54    0.53
  -8   2  -1    4.75    0.45
  -8   2  -1    5.98    0.66
   8  -2   1    5.63    0.51
   8  -2   1    4.65    0.44
   8  -2   1    5.72    0.42
   8  -2   1    6.01    0.67
   8  -2   1    6.03    0.54
  -9   2  -1    6.70    0.81
  -9   2  -1    7.29    0.76
  -9   2  -1    6.54    0.54
   9  -2   1    8.02    0.65
   9  -2   1    7.23    0.62
   9  -2   1    7.04    0.52
   9  -2   1    7.73    0.64
   9  -2   1    6.28    0.79
 -10   2  -1    3.56    1.04
 -10   2  -1    4.89    0.72
 -10   2  -1    5.98    0.62
  10  -2   1    4.50    0.52
  10  -2   1    4.46    0.56
  10  -2   1    5.04    0.67
  10  -2   1    4.34    0.54
  10  -2   1    4.53    0.55
 -11   2  -1    4.77    0.53
 -11   2  -1    4.27    0.72
 -11   2  -1    4.01    0.67
  11  -2   1    4.90    0.71
  11  -2   1    4.35    0.64
  11  -2   1    4.83    0.82
  11  -2   1    5.17    0.60
  11  -2   1    5.24    0.52
  11  -2   1    4.76    0.61
 -12   2  -1    1.03    0.80
 -12   2  -1    2.40    0.55
 -12   2  -1    2.20    0.81
  12  -2   1    1.69    0.51
  12  -2   1    1.14    0.64
  12  -2   1    1.34    0.58
  12  -2   1    1.31    0.79
 -13   2  -1    0.94    0.86
 -13   2  -1   -0.38    0.54
  13  -2   1   -0.55    0.66
  13  -2   1   -0.18    0.53
  13   1  -1    0.34    0.79
  13   1  -1    0.64    0.63
  13   1  -1    0.56    0.58
 -13  -1   1    1.88    0.83
 -13  -1   1   -0.53    0.62
  12   1  -1   -1.64    0.72
  12   1  -1   -0.72    0.45
  12   1  -1   -0.17    0.59
  12   1  -1   -0.70    0.78
  12   1  -1    0.07    0.52
 -12  -1   1    0.38    0.67
 -12  -1   1   -0.03    0.66
 -12  -1   1    0.40    0.52
  11   1  -1    1.60    0.47
  11   1  -1    0.88    0.64
  11   1  -1    0.36    0.52
  11   1  -1    0.83    0.63
  11   1  -1    1.79    0.69
  11   1  -1    0.39    0.40
 -11  -1   1    0.96    0.62
 -11  -1   1    1.09    0.70
 -11  -1   1    1.16    0.47
  10   1  -1   14.15    1.07
  10   1  -1   16.88    1.00
  10   1  -1   14.26    0.90
  10   1  -1   16.43    0.78
  10   1  -1   14.69    1.02
  10   1  -1   15.24    0.82
 -10  -1   1   15.61    1.04
 -10  -1   1   14.23    0.59
 -10  -1   1   15.60    1.01
 -10  -1   1   16.45    0.96
 -10  -1   1   13.88    0.81
   9   1  -1    8.22    0.80
   9   1  -1    8.76    0.77
   9   1  -1    8.23    0.70
   9   1  -1    9.41    0.60
   9   1  -1    7.26    0.59
  -9  -1   1    8.41    0.78
  -9  -1   1    8.35    0.78
  -9  -1   1    8.98    0.50
  -9  -1   1    7.61    0.73
  -9  -1   1    8.15    0.65
   8   1  -1   26.60    1.00
   8   1  -1   25.56    0.65
   8   1  -1   26.12    0.88
   8   1  -1   25.12    0.81
   8   1  -1   25.13    0.78
   8   1  -1   26.62    0.91
  -8  -1   1   25.79    0.92
  -8  -1   1   26.08    0.70
  -8  -1   1   25.15    0.97
  -8  -1   1   26.56    0.93
  -8  -1   1   25.68    0.83
   7   1  -1   22.76    0.60
   7   1  -1   22.95    0.78
   7   1  -1   23.32    0.70
   7   1  -1   25.17    0.88
   7   1  -1   23.55    0.72
   7   1  -1   23.76    0.77
  -7  -1   1   23.59    0.79
  -7  -1   1   23.44    0.73
  -7  -1   1   23.35    0.64
  -7  -1   1   24.65    0.82
  -7  -1   1   22.75    0.85
   6   1  -1   21.41    0.67
   6   1  -1   22.24    0.64
   6   1  -1   21.55    0.55
   6   1  -1   22.24    0.62
   6   1  -1   22.31    0.76
   6   1  -1   21.01    0.67
  -6  -1   1   21.07    0.64
  -6  -1   1   22.93    0.70
  -6  -1   1   20.70    0.69
  -6  -1   1   22.52    0.58
  -6  -1   1   22.47    0.75
   5   1  -1    0.56    0.17
   5   1  -1    0.30    0.24
   5   1  -1    0.46    0.16
   5   1  -1    0.70    0.25
   5   1  -1    0.61    0.19
   5   1  -1    0.35    0.19
  -5  -1   1    0.48    0.21
  -5  -1   1    0.44    0.18
  -5  -1   1    0.65    0.23
  -5  -1   1    0.49    0.20
  -5  -1   1    0.49    0.17
   4   1  -1  214.61    3.54
   4   1  -1  212.44    3.51
   4   1  -1  206.64    3.57
   4   1  -1  221.65    3.62
   4   1  -1  217.55    3.46
  -4  -1   1  218.23    3.56
  -4  -1   1  216.52    3.48
  -4  -1   1  214.79    3.52
  -4  -1   1  214.59    3.61
  -4  -1   1  214.92    3.53
   3   1  -1   81.96    1.45
   3   1  -1   84.05    1.45
   3   1  -1   84.09    1.40
   3   1  -1   83.21    1.42
   3   1  -1   83.35    1.42
   3   1  -1   84.73    1.50
  -3  -1   1   81.15    1.43
  -3  -1   1   73.51    1.46
  -3  -1   1   82.03    1.50
  -3  -1   1   83.66    1.43
   2   1  -1   24.50    0.49
   2   1  -1   24.59    0.55
   2   1  -1   23.55    0.48
   2   1  -1   24.10    0.52
   2   1  -1   24.12    0.52
  -2  -1   1   23.90    0.49
  -2  -1   1   24.16    0.51
  -2  -1   1   24.12    0.53
  -2  -1   1   24.96    0.51
  -2  -1   1   24.35    0.50
  -2  -1   1   24.92    0.56
   1   1  -1   64.15    1.05
   1   1  -1   66.82    1.11
   1   1  -1   65.42    1.09
   1   1  -1   64.56    1.09
  -1  -1   1   64.27    1.08
  -1  -1   1   64.29    1.08
  -1  -1   1   65.51    1.06
  -1  -1   1   66.24    1.10
  -1  -1   1   65.71    1.09
  -1  -1   1   66.05    1.11
  -1   1  -1   33.02    0.59
  -1   1  -1   33.06    0.60
  -1   1  -1   32.56    0.53
  -1   1  -1   32.57    0.53
  -1   1  -1   33.42    0.59
   1  -1   1   32.33    0.53
   1  -1   1   31.99    0.52
   1  -1   1   33.43    0.60
   1  -1   1   32.91    0.59
   1  -1   1   32.96    0.53
   1  -1   1   32.68    0.59
  -2   1  -1   11.37    0.27
  -2   1  -1   11.40    0.35
  -2   1  -1   11.02    0.26
  -2   1  -1   11.00    0.33
  -2   1  -1   11.63    0.29
   2  -1   1   11.19    0.27
   2  -1   1   11.39    0.30
   2  -1   1   11.12    0.26
   2  -1   1   11.23    0.33
   2  -1   1   11.46    0.35
   2  -1   1   11.32    0.25
  -3   1  -1    2.59    0.24
  -3   1  -1    2.27    0.18
  -3   1  -1    2.03    0.24
  -3   1  -1    2.30    0.19
  -3   1  -1    2.58    0.19
   3  -1   1    2.65    0.19
   3  -1   1    2.30    0.18
   3  -1   1    2.44    0.23
   3  -1   1    2.19    0.25
   3  -1   1    2.34    0.16
   3  -1   1    2.52    0.19
  -4   1  -1    4.15    0.24
  -4   1  -1    3.07    0.23
  -4   1  -1    4.17    0.33
  -4   1  -1    3.64    0.30
  -4   1  -1    3.71    0.23
   4  -1   1    3.71    0.24
   4  -1   1    4.00    0.23
   4  -1   1    3.73    0.32
   4  -1   1    3.96    0.26
   4  -1   1    3.74    0.22
   4  -1   1    3.54    0.27
  -5   1  -1    0.70    0.18
  -5   1  -1    0.35    0.21
  -5   1  -1    0.57    0.20
   5  -1   1    0.56    0.15
   5  -1   1    0.52    0.16
   5  -1   1    0.65    0.18
   5  -1   1    0.42    0.21
   5  -1   1    0.79    0.20
   5  -1   1    0.66    0.15
  -6   1  -1   56.53    1.05
  -6   1  -1   56.15    1.13
  -6   1  -1   56.60    1.26
  -6   1  -1   56.76    1.29
   6  -1   1   56.40    1.28
   6  -1   1   55.88    1.20
   6  -1   1   56.48    1.05
   6  -1   1   58.26    1.16
   6  -1   1   56.85    1.11
   6  -1   1   57.31    1.16
  -7   1  -1   14.32    0.66
  -7   1  -1   14.59    0.54
  -7   1  -1   14.01    0.68
  -7   1  -1   13.84    0.44
   7  -1   1   13.32    0.58
   7  -1   1   13.91    0.68
   7  -1   1   14.06    0.50
   7  -1   1   13.71    0.56
   7  -1   1   13.91    0.44
   7  -1   1   14.07    0.57
  -8   1  -1    4.57    0.45
  -8   1  -1    3.93    0.34
  -8   1  -1    4.41    0.51
  -8   1  -1    4.29    0.50
   8  -1   1    4.45    0.51
   8  -1   1    4.06    0.48
   8  -1   1    3.88    0.34
   8  -1   1    3.67    0.35
   8  -1   1    4.01    0.43
   8  -1   1    3.36    0.37
  -9   1  -1   17.65    0.90
  -9   1  -1   18.53    0.92
  -9   1  -1   16.76    0.70
   9  -1   1   17.00    0.66
   9  -1   1   16.94    0.79
   9  -1   1   17.44    0.77
   9  -1   1   17.37    0.77
   9  -1   1   18.33    0.98
 -10   1  -1    0.12    0.37
 -10   1  -1    0.32    0.52
  10  -1   1    0.07    0.41
  10  -1   1    0.45    0.39
  10  -1   1    0.40    0.29
  10  -1   1    0.19    0.55
  10  -1   1    0.69    0.47
 -11   1  -1    0.40    0.54
 -11   1  -1   -0.07    0.40
 -11   1  -1    0.65    0.67
  11  -1   1    0.41    0.58
  11  -1   1   -0.80    0.45
  11  -1   1   -0.05    0.67
  11  -1   1    0.73    0.43
 -12   1  -1    0.24    0.66
 -12   1  -1    0.01    0.51
  12  -1   1   -0.41    0.50
  12  -1   1    0.52    0.73
  12  -1   1    1.02    0.64
  12  -1   1    0.08    0.43
 -13   1  -1    0.62    0.85
 -13   1  -1    0.10    0.55
  13  -1   1    0.59    0.53
  13  -1   1    0.34    0.58
  13   0  -1    0.69    0.59
  13   0  -1    0.81    0.54
 -13   0   1    0.38    0.65
 -13   0   1   -0.85    0.79
  12   0  -1    0.09    0.50
  12   0  -1   -0.75    0.46
  12   0  -1    0.01    0.62
  12   0  -1    1.46    0.80
 -12   0   1    0.41    0.50
 -12   0   1    1.66    0.70
 -12   0   1   -0.04    0.72
  11   0  -1    0.40    0.48
  11   0  -1   -1.30    0.63
  11   0  -1    0.65    0.40
  11   0  -1   -0.67    0.60
  11   0  -1    0.62    0.62
  11   0  -1   -0.45    0.53
 -11   0   1    1.03    0.60
 -11   0   1    0.45    0.62
 -11   0   1    0.52    0.65
 -11   0   1    0.56    0.44
  10   0  -1   11.63    0.71
  10   0  -1   11.88    0.96
  10   0  -1   12.53    0.75
  10   0  -1    9.44    1.03
  10   0  -1   13.28    1.05
  10   0  -1   12.49    0.96
 -10   0   1   10.11    1.12
 -10   0   1   13.32    0.77
 -10   0   1   12.39    0.99
   9   0  -1    3.29    0.37
   9   0  -1    3.26    0.49
   9   0  -1    2.51    0.57
   9   0  -1    3.35    0.58
   9   0  -1    3.06    0.41
  -9   0   1    3.87    0.58
  -9   0   1    3.21    0.52
  -9   0   1    3.86    0.47
   8   0  -1   11.13    0.66
   8   0  -1   12.19    0.69
   8   0  -1   11.19    0.60
   8   0  -1   12.06    0.77
   8   0  -1   10.22    0.55
  -8   0   1   12.08    0.72
  -8   0   1   11.27    0.67
  -8   0   1   12.48    0.73
  -8   0   1   11.72    0.60
   7   0  -1   18.21    0.67
   7   0  -1   18.27    0.70
   7   0  -1   18.90    0.78
   7   0  -1   17.80    0.46
   7   0  -1   17.74    0.60
   7   0  -1   18.22    0.65
  -7   0   1   17.80    0.63
  -7   0   1   18.70    0.76
  -7   0   1   19.25    0.72
  -7   0   1   17.64    0.53
  -7   0   1   19.80    0.74
   6   0  -1   54.52    1.00
   6   0  -1   56.57    1.28
   6   0  -1   55.24    1.19
   6   0  -1   54.67    1.12
   6   0  -1   55.08    1.18
   6   0  -1   55.25    1.18
  -6   0   1   55.86    1.28
  -6   0   1   56.15    1.21
  -6   0   1   54.66    1.22
  -6   0   1   55.42    1.15
   5   0  -1   10.84    0.40
   5   0  -1   11.33    0.46
   5   0  -1   11.02    0.45
   5   0  -1   11.87    0.52
   5   0  -1   12.12    0.45
   5   0  -1   11.43    0.32
  -5   0   1   11.32    0.43
  -5   0   1   11.30    0.35
  -5   0   1   10.93    0.51
  -5   0   1   11.60    0.48
  -5   0   1   11.51    0.48
   4   0  -1   23.42    0.46
   4   0  -1   23.64    0.64
   4   0  -1   22.30    0.58
   4   0  -1   22.36    0.55
   4   0  -1   23.40    0.58
   4   0  -1   22.94    0.58
  -4   0   1   23.29    0.56
  -4   0   1   22.53    0.63
  -4   0   1   22.96    0.60
  -4   0   1   23.05    0.59
  -4   0   1   23.32    0.48
   3   0  -1    5.97    0.27
   3   0  -1    6.08    0.28
   3   0  -1    5.97    0.31
   3   0  -1    5.88    0.28
   3   0  -1    6.00    0.19
   3   0  -1    5.63    0.25
  -3   0   1    5.74    0.28
  -3   0   1    6.03    0.21
  -3   0   1    6.04    0.28
  -3   0   1    5.39    0.31
  -3   0   1    5.91    0.26
   2   0  -1    0.01    0.07
   2   0  -1    0.03    0.14
   2   0  -1    0.14    0.10
   2   0  -1    0.00    0.10
   2   0  -1   -0.08    0.11
  -2   0   1   -0.01    0.11
  -2   0   1   -0.33    0.13
  -2   0   1    0.11    0.11
  -2   0   1    0.09    0.07
   1   0  -1    1.53    0.16
   1   0  -1    1.56    0.16
   1   0  -1    1.79    0.11
   1   0  -1    1.55    0.09
  -1   0   1    1.57    0.11
  -1   0   1    1.39    0.13
  -2   0  -1  195.56    3.02
  -2   0  -1  176.57    3.07
  -2   0  -1  195.17    3.09
  -2   0  -1  193.66    3.06
  -2   0  -1  196.64    3.04
   2   0   1  191.17    3.03
   2   0   1  198.43    3.04
   2   0   1  180.68    3.05
   2   0   1  192.22    3.04
   2   0   1  192.03    3.05
   2   0   1  194.93    3.09
  -3   0  -1   71.04    1.26
  -3   0  -1   71.35    1.21
  -3   0  -1   71.48    1.31
  -3   0  -1   70.47    1.21
  -3   0  -1   69.64    1.22
   3   0   1   70.85    1.30
   3   0   1   71.10    1.23
   3   0   1   70.78    1.25
   3   0   1   70.82    1.21
   3   0   1   70.42    1.24
   3   0   1   70.53    1.21
  -4   0  -1    9.70    0.34
  -4   0  -1    9.71    0.33
  -4   0  -1    8.83    0.41
   4   0   1    9.31    0.34
   4   0   1    9.69    0.35
   4   0   1    9.58    0.31
   4   0   1    9.21    0.35
   4   0   1    9.21    0.40
   4   0   1    9.11    0.32
  -5   0  -1    0.98    0.18
  -5   0  -1    1.24    0.18
  -5   0  -1    1.39    0.27
  -5   0  -1    0.99    0.21
  -5   0  -1    1.36    0.23
   5   0   1    1.41    0.21
   5   0   1    1.13    0.25
   5   0   1    1.24    0.19
   5   0   1    1.25    0.18
   5   0   1    1.04    0.20
   5   0   1    1.11    0.18
  -6   0  -1    5.06    0.36
  -6   0  -1    5.49    0.40
  -6   0  -1    5.79    0.34
  -6   0  -1    6.18    0.46
  -6   0  -1    5.20    0.43
   6   0   1    5.60    0.37
   6   0   1    5.85    0.37
   6   0   1    5.10    0.45
   6   0   1    5.35    0.34
   6   0   1    5.48    0.39
   6   0   1    5.47    0.32
  -7   0  -1   35.40    0.79
  -7   0  -1   35.06    0.93
  -7   0  -1   36.94    0.99
  -7   0  -1   35.58    1.03
  -7   0  -1   34.64    0.88
   7   0   1   32.74    1.01
   7   0   1   36.60    0.85
   7   0   1   35.04    0.79
   7   0   1   36.17    1.03
   7   0   1   35.40    0.91
   7   0   1   35.49    0.91
  -8   0  -1    0.12    0.25
  -8   0  -1    0.29    0.23
  -8   0  -1    0.31    0.33
  -8   0  -1   -0.19    0.27
  -8   0  -1   -0.13    0.35
   8   0   1    0.09    0.35
   8   0   1   -0.21    0.29
   8   0   1    0.19    0.26
   8   0   1    0.14    0.21
   8   0   1   -0.37    0.25
   8   0   1    0.18    0.25
  -9   0  -1   39.79    1.06
  -9   0  -1   39.71    1.15
  -9   0  -1   41.08    1.28
  -9   0  -1   39.81    0.91
  -9   0  -1   39.20    1.23
   9   0   1   40.66    1.16
   9   0   1   39.60    1.02
   9   0   1   39.75    1.28
   9   0   1   40.94    1.11
   9   0   1   38.59    1.11
   9   0   1   38.71    0.88
 -10   0  -1   19.46    0.63
 -10   0  -1   18.53    0.95
 -10   0  -1   19.68    1.08
 -10   0  -1   19.74    0.85
  10   0   1   19.71    0.61
  10   0   1   20.33    0.96
  10   0   1   19.00    0.92
  10   0   1   18.84    0.92
  10   0   1   18.79    0.78
  10   0   1   19.78    1.10
 -11   0  -1    1.50    0.63
 -11   0  -1    0.93    0.44
 -11   0  -1    2.08    0.66
 -11   0  -1    1.25    0.50
  11   0   1   -0.01    0.38
  11   0   1    0.58    0.57
  11   0   1    0.95    0.37
  11   0   1   -0.31    0.50
  11   0   1    0.59    0.65
 -12   0  -1    0.14    0.51
 -12   0  -1    0.69    0.67
  12   0   1    0.21    0.47
  12   0   1    0.43    0.46
  12   0   1    0.67    0.68
  12   0   1    0.86    0.69
 -13   0  -1    2.42    0.81
 -13   0  -1    2.31    0.66
  13   0   1    1.68    0.62
  13   0   1    0.95    0.58
  13  -1  -1    0.10    0.56
  13  -1  -1    0.40    0.60
 -13   1   1    0.01    0.63
 -13   1   1   -0.05    0.88
  12  -1  -1    0.02    0.49
  12  -1  -1    0.41    0.79
  12  -1  -1   -0.07    0.52
  12  -1  -1    0.56    0.63
 -12   1   1    0.98    0.70
 -12   1   1    0.91    0.50
 -12   1   1    0.05    0.69
  11  -1  -1    4.76    0.83
  11  -1  -1    5.52    0.70
  11  -1  -1    6.11    0.54
  11  -1  -1    4.85    0.66
  11  -1  -1    5.34    0.60
  11  -1  -1    5.08    0.75
 -11   1   1    5.48    0.60
 -11   1   1    4.96    0.65
 -11   1   1    4.76    0.75
 -11   1   1    4.60    0.99
  10  -1  -1   37.86    1.42
  10  -1  -1   37.85    1.18
  10  -1  -1   38.51    1.22
  10  -1  -1   39.01    1.31
  10  -1  -1   35.40    1.36
  10  -1  -1   39.11    1.09
 -10   1   1   36.03    1.68
 -10   1   1   39.60    1.42
 -10   1   1   38.99    1.32
 -10   1   1   38.37    1.15
   9  -1  -1    0.36    0.43
   9  -1  -1   -0.10    0.32
   9  -1  -1   -0.33    0.25
   9  -1  -1    0.09    0.38
   9  -1  -1   -0.05    0.44
   9  -1  -1    1.04    0.42
  -9   1   1    0.29    0.39
  -9   1   1   -0.03    0.28
  -9   1   1    0.18    0.40
  -9   1   1    0.16    0.43
   8  -1  -1   12.69    0.64
   8  -1  -1   13.60    0.69
   8  -1  -1   13.70    0.75
   8  -1  -1   13.57    0.59
   8  -1  -1   14.00    0.65
  -8   1   1   14.74    0.78
  -8   1   1   12.91    0.61
  -8   1   1   13.33    0.78
   7  -1  -1   62.53    1.34
   7  -1  -1   63.93    1.29
   7  -1  -1   63.28    1.38
   7  -1  -1   64.90    1.38
  -7   1   1   62.08    1.48
  -7   1   1   64.64    1.45
  -7   1   1   63.34    1.31
   6  -1  -1   14.05    0.62
   6  -1  -1   13.72    0.54
   6  -1  -1   14.43    0.49
   6  -1  -1   14.39    0.56
   6  -1  -1   14.37    0.54
  -6   1   1   13.94    0.58
  -6   1   1   14.08    0.60
  -6   1   1   14.30    0.61
  -6   1   1   15.03    0.51
   5  -1  -1    0.16    0.15
   5  -1  -1    0.09    0.17
   5  -1  -1    0.08    0.16
   5  -1  -1   -0.26    0.19
   5  -1  -1    0.05    0.17
  -5   1   1    0.14    0.15
  -5   1   1    0.09    0.21
  -5   1   1   -0.04    0.19
   4  -1  -1   43.76    0.89
   4  -1  -1   44.59    0.90
   4  -1  -1   43.93    0.93
   4  -1  -1   44.42    0.87
   4  -1  -1   45.09    0.96
  -4   1   1   44.37    0.88
  -4   1   1   44.00    0.94
  -4   1   1   44.45    0.97
   3  -1  -1    3.05    0.26
   3  -1  -1    3.62    0.23
   3  -1  -1    3.80    0.26
   3  -1  -1    3.77    0.24
  -3   1   1    3.05    0.27
  -3   1   1    3.60    0.26
  -3   1   1    3.51    0.22
   2  -1  -1  161.47    2.61
   2  -1  -1  160.79    2.58
   2  -1  -1  159.24    2.61
   2  -1  -1  157.88    2.58
   2  -1  -1  161.58    2.60
  -2   1   1  161.72    2.57
  -2   1   1  157.94    2.63
  -2   1   1  162.34    2.62
   1  -1  -1  107.60    1.71
   1  -1  -1  106.74    1.72
   1  -1  -1  107.66    1.67
   1  -1  -1  106.46    1.71
   1  -1  -1  107.76    1.71
  -1   1   1  105.24    1.67
  -1   1   1  105.50    1.71
  -1   1   1  106.11    1.71
  -1  -1  -1    1.57    0.12
  -1  -1  -1    1.68    0.10
  -1  -1  -1    1.74    0.11
   1   1   1    1.56    0.15
   1   1   1    1.82    0.10
   1   1   1    1.60    0.09
   1   1   1    1.72    0.13
   1   1   1    1.76    0.09
   1   1   1    1.76    0.10
  -2  -1  -1    3.85    0.19
  -2  -1  -1    4.40    0.19
  -2  -1  -1    3.90    0.21
  -2  -1  -1    4.03    0.22
  -2  -1  -1    3.95    0.24
  -2  -1  -1    3.46    0.24
   2   1   1    3.76    0.19
   2   1   1    3.91    0.21
   2   1   1    3.09    0.24
   2   1   1    3.91    0.22
   2   1   1    3.62    0.23
   2   1   1    4.22    0.19
  -3  -1  -1   40.01    0.77
  -3  -1  -1   38.43    0.81
  -3  -1  -1   37.12    0.81
  -3  -1  -1   38.49    0.75
  -3  -1  -1   38.07    0.75
  -3  -1  -1   38.15    0.73
   3   1   1   38.48    0.73
   3   1   1   38.02    0.74
   3   1   1   38.91    0.76
   3   1   1   38.88    0.77
   3   1   1   38.96    0.75
  -4  -1  -1    1.86    0.18
  -4  -1  -1    2.03    0.20
  -4  -1  -1    2.15    0.25
  -4  -1  -1    2.24    0.26
  -4  -1  -1    2.37    0.22
  -4  -1  -1    2.16    0.22
   4   1   1    2.17    0.24
   4   1   1    2.26    0.23
   4   1   1    1.95    0.25
   4   1   1    2.12    0.21
   4   1   1    2.03    0.25
   4   1   1    1.97    0.23
  -5  -1  -1   73.78    1.38
  -5  -1  -1   73.14    1.49
  -5  -1  -1   73.12    1.41
  -5  -1  -1   75.24    1.36
  -5  -1  -1   73.37    1.41
  -5  -1  -1   72.99    1.37
   5   1   1   73.43    1.35
   5   1   1   74.49    1.41
   5   1   1   74.02    1.38
   5   1   1   73.28    1.39
   5   1   1   73.29    1.48
   5   1   1   74.13    1.36
  -6  -1  -1   65.91    1.32
  -6  -1  -1   67.74    1.31
  -6  -1  -1   65.49    1.44
  -6  -1  -1   67.42    1.38
  -6  -1  -1   66.89    1.28
  -6  -1  -1   66.66    1.36
   6   1   1   65.31    1.34
   6   1   1   66.11    1.32
   6   1   1   66.02    1.33
   6   1   1   66.24    1.28
   6   1   1   66.52    1.27
   6   1   1   66.37    1.44
  -7  -1  -1    2.23    0.28
  -7  -1  -1    2.52    0.31
  -7  -1  -1    2.65    0.34
  -7  -1  -1    3.11    0.41
  -7  -1  -1    2.39    0.29
   7   1   1    2.91    0.31
   7   1   1    2.62    0.33
   7   1   1    2.68    0.30
   7   1   1    2.42    0.27
   7   1   1    2.11    0.34
   7   1   1    2.90    0.29
  -8  -1  -1    6.54    0.48
  -8  -1  -1    5.87    0.64
  -8  -1  -1    6.47    0.52
  -8  -1  -1    6.00    0.56
  -8  -1  -1    7.06    0.61
   8   1   1    6.94    0.49
   8   1   1    7.01    0.65
   8   1   1    5.66    0.44
   8   1   1    5.23    0.46
   8   1   1    6.80    0.59
  -9  -1  -1  103.32    1.91
  -9  -1  -1  103.99    2.04
  -9  -1  -1  101.41    2.12
  -9  -1  -1  102.90    2.28
  -9  -1  -1  102.22    2.18
   9   1   1   99.64    2.15
   9   1   1  101.79    2.11
   9   1   1   99.37    2.24
   9   1   1  102.44    1.88
   9   1   1  104.97    2.00
 -10  -1  -1   11.25    0.86
 -10  -1  -1   11.96    0.92
 -10  -1  -1   10.21    0.74
 -10  -1  -1   10.32    0.60
  10   1   1    9.71    0.96
  10   1   1    9.07    1.05
  10   1   1    9.32    0.83
  10   1   1   11.19    0.85
  10   1   1   10.48    0.57
  10   1   1    9.62    0.66
 -11  -1  -1    1.01    0.62
 -11  -1  -1    0.00    0.47
 -11  -1  -1    0.09    0.63
 -11  -1  -1    0.51    0.42
 -11  -1  -1    1.01    0.35
  11   1   1    1.26    0.63
  11   1   1    0.79    0.42
  11   1   1   -0.48    0.48
  11   1   1    0.61    0.67
  11   1   1    0.13    0.58
  11   1   1    0.85    0.33
 -12  -1  -1    1.99    0.73
 -12  -1  -1    1.56    0.73
 -12  -1  -1    1.50    0.55
  12   1   1    1.13    0.50
  12   1   1    2.33    0.72
  12   1   1    1.77    0.54
  12   1   1    2.17    0.64
 -13  -1  -1    0.86    0.84
 -13  -1  -1   -0.33    0.60
  13   1   1    0.42    0.65
  13   1   1    0.92    0.57
  13   1   1    0.26    0.55
  14   1   1    0.36    0.68
  13  -2  -1    2.69    0.60
  13  -2  -1    3.67    0.72
 -13   2   1    3.30    0.98
 -13   2   1    4.35    0.66
  12  -2  -1    3.35    0.64
  12  -2  -1    2.03    0.81
  12  -2  -1    4.60    0.57
  12  -2  -1    3.70    0.70
 -12   2   1    4.35    0.62
 -12   2   1    0.93    0.80
 -12   2   1    2.86    0.77
  11  -2  -1    3.23    0.58
  11  -2  -1    2.46    0.69
  11  -2  -1    4.11    0.52
  11  -2  -1    2.59    0.56
  11  -2  -1    2.33    0.65
  11  -2  -1    2.39    0.75
 -11   2   1    3.22    0.70
 -11   2   1    3.27    0.56
  10  -2  -1   18.20    0.90
  10  -2  -1   15.24    0.88
  10  -2  -1   15.62    1.04
  10  -2  -1   12.78    1.05
  10  -2  -1   16.13    0.99
  10  -2  -1   17.13    1.09
 -10   2   1   16.06    0.80
 -10   2   1   15.15    1.50
 -10   2   1   16.61    1.12
   9  -2  -1   80.10    1.75
   9  -2  -1   77.94    1.62
   9  -2  -1   77.87    1.75
   9  -2  -1   75.54    1.88
   9  -2  -1   76.98    1.70
   9  -2  -1   77.83    1.83
  -9   2   1   78.93    1.88
  -9   2   1   76.71    1.88
  -9   2   1   79.30    1.65
   8  -2  -1    1.31    0.29
   8  -2  -1    1.39    0.31
   8  -2  -1    1.91    0.36
   8  -2  -1    1.46    0.38
   8  -2  -1    2.09    0.38
   8  -2  -1    1.24    0.41
  -8   2   1    2.19    0.44
  -8   2   1    2.08    0.43
  -8   2   1    1.47    0.30
   7  -2  -1    1.71    0.33
   7  -2  -1    2.27    0.32
   7  -2  -1    2.75    0.35
   7  -2  -1    2.03    0.25
   7  -2  -1    1.98    0.28
   7  -2  -1    2.16    0.39
  -7   2   1    2.59    0.32
  -7   2   1    3.24    0.41
  -7   2   1    2.91    0.41
   6  -2  -1    6.83    0.49
   6  -2  -1    5.94    0.44
   6  -2  -1    6.22    0.45
   6  -2  -1    6.62    0.42
   6  -2  -1    5.71    0.34
   6  -2  -1    5.86    0.39
  -6   2   1    5.50    0.59
  -6   2   1    6.15    0.47
  -6   2   1    5.85    0.37
   5  -2  -1  126.66    2.26
   5  -2  -1  125.66    2.23
   5  -2  -1  123.18    2.14
   5  -2  -1  124.89    2.17
   5  -2  -1  120.92    2.11
  -5   2   1  117.60    2.17
  -5   2   1  124.86    2.26
  -5   2   1  122.63    2.12
  -5   2   1  123.01    2.26
   4  -2  -1   31.22    0.75
   4  -2  -1   31.94    0.73
   4  -2  -1   31.64    0.76
   4  -2  -1   30.51    0.68
   4  -2  -1   30.51    0.69
  -4   2   1   30.66    0.71
  -4   2   1   31.32    0.66
  -4   2   1   30.40    0.76
  -4   2   1   31.51    0.76
   3  -2  -1    1.01    0.17
   3  -2  -1    1.02    0.17
   3  -2  -1    0.83    0.13
   3  -2  -1    0.78    0.18
   3  -2  -1    0.78    0.13
  -3   2   1    0.92    0.18
  -3   2   1    0.95    0.13
  -3   2   1    1.19    0.18
  -3   2   1    0.85    0.15
   2  -2  -1    1.00    0.10
   2  -2  -1    0.68    0.14
   2  -2  -1    0.62    0.13
   2  -2  -1    0.76    0.12
   2  -2  -1    0.81    0.12
   2  -2  -1    0.96    0.13
  -2   2   1    0.81    0.13
  -2   2   1    0.68    0.13
  -2   2   1    0.73    0.11
   1  -2  -1    3.18    0.17
   1  -2  -1    2.82    0.23
   1  -2  -1    3.27    0.19
   1  -2  -1    2.94    0.18
   1  -2  -1    3.09    0.18
   1  -2  -1    3.48    0.18
  -1   2   1    3.16    0.17
  -1   2   1    3.21    0.17
  -1   2   1    2.87    0.17
  -1   2   1    3.13    0.18
  -1   2   1    3.40    0.18
   0  -2  -1   19.95    0.35
   0  -2  -1   20.10    0.38
   0  -2  -1   19.75    0.41
   0  -2  -1   19.77    0.38
   0  -2  -1   19.90    0.38
   0  -2  -1   20.40    0.44
   0   2   1   19.43    0.35
   0   2   1   20.17    0.38
   0   2   1   20.64    0.44
   0   2   1   19.31    0.41
   0   2   1   19.84    0.38
  -1  -2  -1   11.18    0.27
  -1  -2  -1   11.49    0.28
  -1  -2  -1   12.15    0.29
  -1  -2  -1   10.99    0.27
  -1  -2  -1   11.44    0.29
   1   2   1   11.56    0.29
   1   2   1   11.94    0.28
  -2  -2  -1   45.29    0.87
  -2  -2  -1   45.06    0.82
  -2  -2  -1   46.54    0.85
  -2  -2  -1   46.17    0.89
  -2  -2  -1   46.06    0.84
  -2  -2  -1   45.99    0.82
   2   2   1   46.37    0.84
   2   2   1   44.85    0.82
   2   2   1   46.75    0.89
   2   2   1   44.02    0.86
   2   2   1   45.36    0.82
   2   2   1   47.13    0.87
  -3  -2  -1  214.62    3.51
  -3  -2  -1  222.32    3.57
  -3  -2  -1  214.80    3.57
  -3  -2  -1  219.71    3.54
   3   2   1  216.70    3.50
   3   2   1  221.10    3.53
   3   2   1  219.81    3.56
   3   2   1  213.54    3.50
   3   2   1  221.44    3.58
  -4  -2  -1   10.36    0.36
  -4  -2  -1   10.71    0.37
  -4  -2  -1    9.91    0.38
  -4  -2  -1   10.55    0.41
  -4  -2  -1    9.70    0.43
  -4  -2  -1    9.77    0.40
   4   2   1   10.62    0.36
   4   2   1   10.29    0.39
   4   2   1   10.48    0.41
   4   2   1   10.63    0.35
   4   2   1   10.83    0.40
  -5  -2  -1   10.56    0.43
  -5  -2  -1   10.66    0.44
  -5  -2  -1   10.73    0.42
  -5  -2  -1   10.68    0.43
  -5  -2  -1   10.93    0.51
  -5  -2  -1   10.87    0.47
   5   2   1   10.80    0.46
   5   2   1   10.89    0.44
   5   2   1   10.89    0.40
   5   2   1   11.32    0.51
   5   2   1   11.34    0.45
   5   2   1   10.96    0.40
  -6  -2  -1   23.68    0.67
  -6  -2  -1   23.38    0.66
  -6  -2  -1   22.82    0.76
  -6  -2  -1   23.94    0.71
  -6  -2  -1   23.49    0.69
  -6  -2  -1   24.28    0.67
   6   2   1   23.35    0.76
   6   2   1   22.24    0.67
   6   2   1   23.98    0.66
   6   2   1   23.71    0.70
   6   2   1   22.45    0.63
   6   2   1   23.34    0.64
  -7  -2  -1   44.67    1.06
  -7  -2  -1   44.47    1.03
  -7  -2  -1   45.60    1.20
  -7  -2  -1   45.73    1.11
  -7  -2  -1   44.06    1.10
  -7  -2  -1   46.10    1.06
   7   2   1   46.70    1.03
   7   2   1   45.60    1.20
   7   2   1   45.06    1.08
   7   2   1   45.50    1.10
   7   2   1   45.13    1.02
   7   2   1   44.60    1.03
  -8  -2  -1    1.54    0.38
  -8  -2  -1    1.61    0.32
  -8  -2  -1    2.03    0.37
  -8  -2  -1    2.66    0.42
  -8  -2  -1    2.30    0.35
   8   2   1    1.49    0.35
   8   2   1    1.68    0.30
   8   2   1    1.77    0.32
   8   2   1    1.75    0.27
   8   2   1    1.25    0.31
   8   2   1    1.84    0.42
  -9  -2  -1    0.23    0.33
  -9  -2  -1    1.15    0.42
  -9  -2  -1    1.27    0.37
  -9  -2  -1    0.81    0.41
  -9  -2  -1    0.62    0.42
   9   2   1    1.17    0.37
   9   2   1    0.03    0.39
   9   2   1    0.54    0.32
   9   2   1    1.20    0.31
   9   2   1    1.21    0.32
   9   2   1    1.28    0.48
 -10  -2  -1   13.16    0.98
 -10  -2  -1   13.79    0.88
 -10  -2  -1   13.71    0.73
 -10  -2  -1   11.41    1.19
 -10  -2  -1   13.79    0.79
  10   2   1   14.04    0.91
  10   2   1   11.45    1.04
  10   2   1   14.65    0.73
  10   2   1   13.08    0.67
  10   2   1   12.40    1.02
  10   2   1   14.30    0.88
 -11  -2  -1    5.02    0.66
 -11  -2  -1    4.97    0.51
 -11  -2  -1    3.26    0.67
 -11  -2  -1    4.41    0.78
 -11  -2  -1    4.05    0.65
  11   2   1    4.30    0.62
  11   2   1    3.34    0.71
  11   2   1    4.15    0.51
  11   2   1    4.57    0.46
  11   2   1    4.54    0.51
  11   2   1    5.34    0.70
 -12  -2  -1    3.18    0.77
 -12  -2  -1    5.31    0.66
 -12  -2  -1    3.60    0.50
 -12  -2  -1    3.25    0.80
  12   2   1    3.92    0.82
  12   2   1    4.93    0.61
  12   2   1    5.40    0.62
  12   2   1    5.55    0.75
 -13  -2  -1    1.18    0.63
 -13  -2  -1    0.80    0.84
  13   2   1    1.46    0.72
  13   2   1    2.19    0.64
  13   2   1    2.56    0.64
  14   2   1    7.62    0.81
  13  -3  -1    3.51    0.62
  13  -3  -1    4.40    0.85
 -13   3   1    3.99    1.08
 -13   3   1    4.78    0.68
  12  -3  -1   10.56    0.86
  12  -3  -1    9.96    1.14
  12  -3  -1   10.25    1.03
  12  -3  -1    9.46    1.04
 -12   3   1    9.87    0.91
 -12   3   1   11.26    1.34
 -12   3   1    9.12    1.42
  11  -3  -1   20.15    0.90
  11  -3  -1   21.57    1.12
  11  -3  -1   18.88    1.28
  11  -3  -1   21.48    1.31
  11  -3  -1   22.28    1.12
 -11   3   1   19.65    1.32
 -11   3   1   21.79    0.97
 -11   3   1   22.55    1.32
  10  -3  -1   24.10    1.18
  10  -3  -1   24.71    0.87
  10  -3  -1   25.69    1.06
  10  -3  -1   23.69    1.15
  10  -3  -1   24.25    1.01
  10  -3  -1   24.66    1.11
 -10   3   1   25.61    1.32
 -10   3   1   24.01    1.39
 -10   3   1   25.97    0.91
 -10   3   1   24.25    1.15
   9  -3  -1    1.90    0.33
   9  -3  -1    1.67    0.44
   9  -3  -1    2.06    0.47
   9  -3  -1    2.57    0.44
   9  -3  -1    2.41    0.56
   9  -3  -1    1.78    0.43
  -9   3   1    2.71    0.40
  -9   3   1    1.93    0.48
  -9   3   1    2.29    0.50
  -9   3   1    1.88    0.53
   8  -3  -1   15.84    0.72
   8  -3  -1   15.00    0.78
   8  -3  -1   15.36    0.75
   8  -3  -1   14.57    0.66
   8  -3  -1   15.17    0.82
   8  -3  -1   14.63    0.59
  -8   3   1   15.42    0.62
  -8   3   1   16.04    0.87
  -8   3   1   16.70    0.83
  -8   3   1   14.98    0.77
   7  -3  -1   21.85    0.69
   7  -3  -1   21.62    0.78
   7  -3  -1   21.74    0.78
   7  -3  -1   20.76    0.63
   7  -3  -1   21.51    0.83
   7  -3  -1   22.22    0.74
  -7   3   1   20.36    0.76
  -7   3   1   21.34    0.65
  -7   3   1   21.29    0.85
  -7   3   1   21.66    0.82
   6  -3  -1   25.44    0.72
   6  -3  -1   25.50    0.76
   6  -3  -1   25.49    0.81
   6  -3  -1   24.95    0.65
   6  -3  -1   26.48    0.69
   6  -3  -1   25.16    0.79
  -6   3   1   25.15    0.75
  -6   3   1   26.62    0.66
  -6   3   1   25.70    0.83
  -6   3   1   25.46    0.81
   5  -3  -1   19.72    0.65
   5  -3  -1   19.24    0.54
   5  -3  -1   19.70    0.56
   5  -3  -1   19.25    0.60
   5  -3  -1   19.39    0.64
  -5   3   1   20.07    0.60
  -5   3   1   19.47    0.52
  -5   3   1   19.26    0.64
   4  -3  -1  105.67    1.86
   4  -3  -1  106.94    1.84
   4  -3  -1  105.56    1.94
   4  -3  -1  106.73    1.82
   4  -3  -1  108.06    1.92
  -4   3   1  103.74    1.80
  -4   3   1  106.73    1.92
  -4   3   1  103.98    1.85
   3  -3  -1   57.63    1.07
   3  -3  -1   56.84    1.15
   3  -3  -1   59.20    1.12
   3  -3  -1   58.25    1.01
   3  -3  -1   57.74    0.99
   3  -3  -1   58.87    1.05
   3  -3  -1   57.24    1.06
  -3   3   1   57.93    1.07
  -3   3   1   57.99    1.03
  -3   3   1   58.79    1.12
   2  -3  -1   29.27    0.58
   2  -3  -1   28.82    0.58
   2  -3  -1   29.22    0.58
   2  -3  -1   29.67    0.61
   2  -3  -1   29.47    0.59
  -2   3   1   29.73    0.61
  -2   3   1   29.19    0.58
  -2   3   1   28.96    0.57
   1  -3  -1  689.27   12.12
  -1   3   1  703.35   12.02
   0  -3  -1   36.42    0.65
   0  -3  -1   36.89    0.66
   0  -3  -1   36.72    0.71
   0  -3  -1   38.04    0.76
   0  -3  -1   36.45    0.65
   0  -3  -1   36.41    0.65
   0   3   1   36.96    0.66
   0   3   1   36.00    0.65
   0   3   1   36.70    0.65
   0   3   1   37.46    0.75
   0   3   1   37.29    0.73
   0   3   1   36.23    0.65
  -1  -3  -1  214.58    3.39
  -1  -3  -1  213.97    3.39
  -1  -3  -1  213.06    3.49
  -1  -3  -1  218.95    3.39
  -1  -3  -1  209.21    3.37
  -1  -3  -1  211.12    3.39
   1   3   1  218.58    3.39
   1   3   1  213.01    3.39
   1   3   1  209.15    3.40
  -2  -3  -1   10.39    0.30
  -2  -3  -1   11.33    0.36
  -2  -3  -1   10.18    0.32
  -2  -3  -1   10.12    0.30
  -2  -3  -1    9.81    0.33
  -2  -3  -1    9.90    0.41
   2   3   1   10.00    0.32
   2   3   1    9.95    0.33
   2   3   1   10.49    0.40
   2   3   1   10.74    0.34
   2   3   1   10.02    0.30
   2   3   1   10.20    0.30
  -3  -3  -1   21.75    0.51
  -3  -3  -1   21.76    0.55
  -3  -3  -1   21.44    0.57
  -3  -3  -1   21.51    0.60
  -3  -3  -1   22.45    0.54
  -3  -3  -1   21.75    0.50
   3   3   1   21.59    0.53
   3   3   1   21.70    0.51
   3   3   1   22.50    0.60
   3   3   1   21.52    0.55
   3   3   1   21.60    0.49
   3   3   1   21.87    0.57
  -4  -3  -1    9.43    0.43
  -4  -3  -1    9.88    0.39
  -4  -3  -1    9.07    0.45
  -4  -3  -1    9.52    0.36
  -4  -3  -1    9.87    0.36
   4   3   1    9.32    0.40
   4   3   1    9.64    0.35
   4   3   1    9.88    0.44
   4   3   1    9.15    0.36
   4   3   1   10.46    0.42
   4   3   1   10.33    0.45
  -5  -3  -1    0.05    0.21
  -5  -3  -1    0.05    0.16
  -5  -3  -1   -0.22    0.16
  -5  -3  -1    0.31    0.17
  -5  -3  -1   -0.05    0.18
  -5  -3  -1    0.11    0.21
   5   3   1   -0.03    0.21
   5   3   1    0.14    0.15
   5   3   1    0.22    0.17
   5   3   1    0.35    0.19
   5   3   1    0.13    0.22
   5   3   1    0.21    0.19
  -6  -3  -1   29.86    0.77
  -6  -3  -1   29.76    0.79
  -6  -3  -1   29.37    0.78
  -6  -3  -1   28.65    0.87
  -6  -3  -1   29.24    0.81
  -6  -3  -1   30.18    0.83
   6   3   1   29.90    0.75
   6   3   1   29.91    0.88
   6   3   1   29.17    0.81
   6   3   1   30.19    0.74
   6   3   1   29.66    0.80
   6   3   1   30.11    0.81
  -7  -3  -1    1.45    0.29
  -7  -3  -1    1.46    0.27
  -7  -3  -1    1.49    0.31
  -7  -3  -1    1.49    0.32
  -7  -3  -1    1.72    0.33
  -7  -3  -1    1.53    0.28
   7   3   1    1.26    0.30
   7   3   1    1.25    0.23
   7   3   1    1.81    0.40
   7   3   1    1.80    0.30
   7   3   1    1.48    0.25
   7   3   1    1.99    0.34
  -8  -3  -1    5.29    0.52
  -8  -3  -1    4.21    0.51
  -8  -3  -1    4.95    0.56
  -8  -3  -1    4.64    0.48
  -8  -3  -1    4.99    0.57
  -8  -3  -1    4.86    0.61
   8   3   1    4.77    0.56
   8   3   1    3.96    0.48
   8   3   1    4.64    0.46
   8   3   1    4.65    0.51
   8   3   1    4.15    0.43
   8   3   1    4.75    0.46
  -9  -3  -1    6.12    0.72
  -9  -3  -1    6.46    0.68
  -9  -3  -1    7.26    0.72
  -9  -3  -1    6.77    0.62
  -9  -3  -1    7.59    0.67
   9   3   1    8.21    0.72
   9   3   1    6.24    0.57
   9   3   1    7.57    0.78
   9   3   1    8.06    0.56
   9   3   1    7.28    0.59
   9   3   1    6.27    0.72
 -10  -3  -1    0.93    0.52
 -10  -3  -1    0.75    0.41
 -10  -3  -1    1.15    0.48
 -10  -3  -1    1.18    0.43
 -10  -3  -1    1.16    0.47
  10   3   1    1.85    0.53
  10   3   1    0.23    0.36
  10   3   1    1.11    0.40
  10   3   1    1.12    0.47
  10   3   1    0.69    0.56
  10   3   1    0.81    0.39
 -11  -3  -1    5.34    0.57
 -11  -3  -1    5.48    0.60
 -11  -3  -1    2.53    0.71
 -11  -3  -1    4.87    0.73
 -11  -3  -1    5.99    0.76
  11   3   1    4.24    0.50
  11   3   1    3.27    0.78
  11   3   1    4.45    0.58
  11   3   1    4.75    0.53
  11   3   1    4.75    0.63
  11   3   1    5.36    0.66
 -12  -3  -1    2.79    0.55
 -12  -3  -1    1.39    0.62
 -12  -3  -1    2.80    0.60
 -12  -3  -1    3.12    0.76
  12   3   1    1.82    0.55
  12   3   1    2.69    0.55
  12   3   1    2.71    0.72
  12   3   1    2.00    0.82
 -13  -3  -1   21.54    1.31
 -13  -3  -1   22.56    1.56
 -13  -3  -1   20.71    1.04
  13   3   1   23.50    1.26
  13   3   1   20.04    1.41
  13   3   1   20.24    1.14
  13  -4  -1    3.08    0.60
  13  -4  -1    2.68    0.82
 -13   4   1    1.61    0.93
 -13   4   1    2.86    0.64
  12  -4  -1    0.56    0.48
  12  -4  -1    1.65    0.69
  12  -4  -1    0.11    0.77
 -12   4   1    0.94    0.62
 -12   4   1   -0.11    0.49
 -12   4   1   -0.50    0.70
  11  -4  -1    2.56    0.71
  11  -4  -1    2.42    0.56
  11  -4  -1    2.57    0.76
  11  -4  -1    3.00    0.58
  11  -4  -1    3.06    0.45
 -11   4   1    3.41    0.51
 -11   4   1    3.08    0.66
 -11   4   1    3.15    0.78
  10  -4  -1   21.70    1.09
  10  -4  -1   22.62    1.18
  10  -4  -1   22.94    0.98
  10  -4  -1   22.90    0.85
  10  -4  -1   23.54    1.08
  10  -4  -1   23.02    1.18
 -10   4   1   21.51    1.04
 -10   4   1   23.96    1.17
 -10   4   1   23.99    0.89
   9  -4  -1    2.74    0.65
   9  -4  -1    2.95    0.47
   9  -4  -1    3.03    0.54
   9  -4  -1    2.99    0.44
   9  -4  -1    3.97    0.57
   9  -4  -1    3.54    0.58
  -9   4   1    3.80    0.59
  -9   4   1    3.20    0.53
   8  -4  -1   22.35    0.76
   8  -4  -1   23.41    0.95
   8  -4  -1   22.06    0.90
   8  -4  -1   22.26    0.83
   8  -4  -1   22.13    0.70
   8  -4  -1   22.87    0.89
  -8   4   1   22.40    0.72
  -8   4   1   22.66    0.87
  -8   4   1   24.06    0.97
   7  -4  -1    0.13    0.20
   7  -4  -1    0.19    0.28
   7  -4  -1    0.30    0.24
   7  -4  -1   -0.21    0.32
   7  -4  -1   -0.32    0.28
   7  -4  -1   -0.34    0.24
  -7   4   1    0.03    0.29
  -7   4   1   -0.02    0.23
  -7   4   1   -0.39    0.30
   6  -4  -1   96.70    1.91
   6  -4  -1   94.54    1.79
   6  -4  -1   93.08    1.91
   6  -4  -1   96.57    1.75
  -6   4   1   96.42    1.92
  -6   4   1   94.96    1.72
  -6   4   1   96.73    1.81
   5  -4  -1  115.69    2.16
   5  -4  -1  115.62    2.12
   5  -4  -1  116.31    2.02
   5  -4  -1  114.96    1.88
   5  -4  -1  104.16    2.15
   5  -4  -1  114.58    1.98
  -5   4   1  115.30    2.12
  -5   4   1  113.44    1.95
  -5   4   1  114.01    2.02
   4  -4  -1   56.21    1.20
   4  -4  -1   55.39    1.07
   4  -4  -1   50.77    1.07
   4  -4  -1   56.71    1.09
   4  -4  -1   56.09    1.04
   4  -4  -1   55.60    1.15
   4  -4  -1   55.80    1.00
  -4   4   1   55.01    1.02
  -4   4   1   55.96    1.08
  -4   4   1   56.84    1.15
   3  -4  -1  129.61    2.18
   3  -4  -1  132.52    2.18
   3  -4  -1  130.33    2.17
   3  -4  -1  127.91    2.31
   3  -4  -1  130.57    2.24
  -3   4   1  129.13    2.14
  -3   4   1  132.71    2.18
  -3   4   1  133.04    2.24
   2  -4  -1  120.41    1.95
   2  -4  -1  121.91    2.03
   2  -4  -1  119.54    1.96
   2  -4  -1  118.62    1.95
   2  -4  -1  118.88    2.00
   2  -4  -1  118.09    2.10
  -2   4   1  116.32    1.94
  -2   4   1  119.37    1.95
  -2   4   1  118.62    2.00
   1  -4  -1   82.94    1.55
   1  -4  -1   92.05    1.47
   1  -4  -1   90.21    1.60
   1  -4  -1   88.47    1.60
   1  -4  -1   89.82    1.49
   1  -4  -1   90.94    1.51
  -1   4   1   91.82    1.47
  -1   4   1   89.40    1.48
  -1   4   1   90.05    1.63
  -1   4   1   92.96    1.59
   0  -4  -1 1000.00   16.99
   0   4   1  995.70   16.84
  -1  -4  -1    7.37    0.25
  -1  -4  -1    6.84    0.27
  -1  -4  -1    6.77    0.27
  -1  -4  -1    7.34    0.27
  -1  -4  -1    8.19    0.28
  -1  -4  -1    6.93    0.38
   1   4   1    7.25    0.27
   1   4   1    7.14    0.27
   1   4   1    7.39    0.26
   1   4   1    6.64    0.36
   1   4   1    8.24    0.30
  -2  -4  -1  116.82    1.97
  -2  -4  -1  113.70    1.92
  -2  -4  -1  116.02    1.93
  -2  -4  -1  118.63    2.08
  -2  -4  -1  115.16    1.95
  -2  -4  -1  114.40    1.94
   2   4   1  109.50    1.96
   2   4   1  116.39    1.96
   2   4   1  117.27    1.96
   2   4   1  116.32    2.06
   2   4   1  114.52    1.94
  -3  -4  -1   24.02    0.68
  -3  -4  -1   23.57    0.55
  -3  -4  -1   23.61    0.61
  -3  -4  -1   23.41    0.55
  -3  -4  -1   23.41    0.60
  -3  -4  -1   24.04    0.59
   3   4   1   24.56    0.67
   3   4   1   23.25    0.60
   3   4   1   23.14    0.55
   3   4   1   23.25    0.55
   3   4   1   22.85    0.59
   3   4   1   23.20    0.58
  -4  -4  -1   13.97    0.45
  -4  -4  -1   13.58    0.43
  -4  -4  -1   13.16    0.48
  -4  -4  -1   13.95    0.50
  -4  -4  -1   14.18    0.55
  -4  -4  -1   12.79    0.52
   4   4   1   13.43    0.48
   4   4   1   13.65    0.49
   4   4   1   13.42    0.54
   4   4   1   14.00    0.43
   4   4   1   14.00    0.45
   4   4   1   14.21    0.51
  -5  -4  -1   89.80    1.81
  -5  -4  -1   92.63    1.82
  -5  -4  -1   94.38    1.74
  -5  -4  -1   93.40    1.71
  -5  -4  -1   94.12    1.71
  -5  -4  -1   91.94    1.77
   5   4   1   92.86    1.74
   5   4   1   95.83    1.82
   5   4   1   94.68    1.76
   5   4   1   91.18    1.68
   5   4   1   92.19    1.80
   5   4   1   92.91    1.70
  -6  -4  -1   60.91    1.29
  -6  -4  -1   61.54    1.34
  -6  -4  -1   60.41    1.39
  -6  -4  -1   62.09    1.29
  -6  -4  -1   60.02    1.35
  -6  -4  -1   60.70    1.27
   6   4   1   61.21    1.34
   6   4   1   61.23    1.31
   6   4   1   62.13    1.40
   6   4   1   61.85    1.32
   6   4   1   60.64    1.23
   6   4   1   62.87    1.26
  -7  -4  -1    1.88    0.39
  -7  -4  -1    1.85    0.29
  -7  -4  -1    1.73    0.33
  -7  -4  -1    1.99    0.34
  -7  -4  -1    1.77    0.35
  -7  -4  -1    1.90    0.33
   7   4   1    1.84    0.33
   7   4   1    1.96    0.36
   7   4   1    2.13    0.30
   7   4   1    1.67    0.34
   7   4   1    2.18    0.35
   7   4   1    1.96    0.27
  -8  -4  -1   25.18    0.89
  -8  -4  -1   25.68    0.98
  -8  -4  -1   26.01    0.91
  -8  -4  -1   25.90    0.90
  -8  -4  -1   25.30    0.87
  -8  -4  -1   25.51    0.86
   8   4   1   25.89    0.83
   8   4   1   26.57    0.92
   8   4   1   25.34    0.91
   8   4   1   24.89    0.77
   8   4   1   27.53    0.87
   8   4   1   26.39    1.00
  -9  -4  -1    1.80    0.44
  -9  -4  -1    0.87    0.40
  -9  -4  -1    1.33    0.48
  -9  -4  -1    1.08    0.42
  -9  -4  -1    1.18    0.36
   9   4   1    0.49    0.41
   9   4   1    1.62    0.51
   9   4   1    1.13    0.35
   9   4   1    0.79    0.39
   9   4   1    1.02    0.32
   9   4   1    1.07    0.43
 -10  -4  -1   -0.05    0.51
 -10  -4  -1    0.21    0.46
 -10  -4  -1    1.18    0.44
 -10  -4  -1   -0.67    0.46
 -10  -4  -1    1.02    0.46
  10   4   1   -0.12    0.53
  10   4   1   -0.32    0.45
  10   4   1    0.09    0.39
  10   4   1    0.84    0.55
  10   4   1   -0.12    0.46
  10   4   1    0.23    0.34
 -11  -4  -1    0.84    0.66
 -11  -4  -1    1.55    0.50
 -11  -4  -1    1.00    0.63
 -11  -4  -1    1.10    0.50
 -11  -4  -1    0.68    0.58
  11   4   1    1.44    0.62
  11   4   1   -0.31    0.76
  11   4   1    0.85    0.49
  11   4   1    0.63    0.42
  11   4   1    1.19    0.58
  11   4   1    1.62    0.48
 -12  -4  -1    0.49    0.76
 -12  -4  -1    2.20    0.80
 -12  -4  -1    0.75    0.55
 -12  -4  -1    0.83    0.54
  12   4   1    0.37    0.70
  12   4   1   -0.55    0.65
  12   4   1    0.32    0.49
  12   4   1    0.71    0.89
 -13  -4  -1    5.54    0.72
 -13  -4  -1    3.88    0.78
 -13  -4  -1    4.75    0.92
  13   4   1    4.55    0.65
  13   4   1    4.03    0.66
  13   4   1    3.23    0.81
  12  -5  -1    3.01    0.51
  12  -5  -1    3.20    0.73
 -12   5   1    3.35    0.55
 -12   5   1    2.28    0.86
  11  -5  -1    0.19    0.55
  11  -5  -1    1.27    0.66
  11  -5  -1    0.14    0.56
  11  -5  -1    0.41    0.72
  11  -5  -1    0.67    0.39
 -11   5   1    0.85    0.63
 -11   5   1    0.93    0.43
 -11   5   1    0.87    0.69
  10  -5  -1    0.67    0.33
  10  -5  -1    0.17    0.86
  10  -5  -1    0.33    0.52
  10  -5  -1    0.79    0.46
  10  -5  -1    1.03    0.58
  10  -5  -1    0.89    0.49
 -10   5   1    0.46    0.38
 -10   5   1    0.72    0.56
 -10   5   1    0.46    0.47
   9  -5  -1    0.09    0.45
   9  -5  -1    0.32    0.45
   9  -5  -1    0.33    0.27
   9  -5  -1    0.17    0.36
   9  -5  -1    0.16    0.40
   9  -5  -1    0.34    0.43
  -9   5   1    1.18    0.44
  -9   5   1    0.53    0.46
  -9   5   1    0.22    0.31
   8  -5  -1   -0.30    0.38
   8  -5  -1   -0.15    0.35
   8  -5  -1   -0.13    0.34
   8  -5  -1    0.50    0.28
   8  -5  -1    0.16    0.35
   8  -5  -1    0.21    0.24
  -8   5   1    0.05    0.34
  -8   5   1   -0.24    0.38
  -8   5   1    0.06    0.25
   7  -5  -1    0.41    0.20
   7  -5  -1    0.41    0.28
   7  -5  -1    0.49    0.29
   7  -5  -1    0.83    0.25
   7  -5  -1    0.53    0.27
   7  -5  -1    0.36    0.34
  -7   5   1    0.33    0.22
  -7   5   1    0.98    0.35
  -7   5   1    0.72    0.32
   6  -5  -1   -0.11    0.23
   6  -5  -1    0.02    0.27
   6  -5  -1    0.06    0.22
   6  -5  -1    0.00    0.17
   6  -5  -1    0.00    0.27
  -6   5   1    0.13    0.17
  -6   5   1    0.28    0.25
  -6   5   1    0.14    0.27
   5  -5  -1   23.84    0.64
   5  -5  -1   23.84    0.58
   5  -5  -1   24.62    0.59
   5  -5  -1   22.81    0.73
   5  -5  -1   24.13    0.66
   5  -5  -1   23.38    0.57
   5  -5  -1   23.39    0.77
  -5   5   1   23.67    0.64
  -5   5   1   24.06    0.73
  -5   5   1   24.07    0.57
   4  -5  -1    8.95    0.38
   4  -5  -1    8.89    0.36
   4  -5  -1    9.03    0.36
   4  -5  -1    9.06    0.37
   4  -5  -1    8.44    0.33
   4  -5  -1    8.77    0.48
   4  -5  -1    9.03    0.43
  -4   5   1    8.75    0.38
  -4   5   1    8.55    0.31
  -4   5   1    9.15    0.44
   3  -5  -1   39.61    0.97
   3  -5  -1   40.43    0.78
   3  -5  -1   40.00    0.87
   3  -5  -1   39.71    0.85
   3  -5  -1   40.65    0.80
   3  -5  -1   40.31    0.78
  -3   5   1   39.62    0.75
  -3   5   1   40.36    0.78
  -3   5   1   41.09    0.87
   2  -5  -1   35.04    0.67
   2  -5  -1   33.79    0.83
   2  -5  -1   34.62    0.68
   2  -5  -1   34.78    0.79
   2  -5  -1   34.41    0.73
   2  -5  -1   34.79    0.65
  -2   5   1   33.87    0.66
  -2   5   1   34.10    0.64
   1  -5  -1  101.79    1.76
   1  -5  -1  105.68    1.87
   1  -5  -1  103.47    1.85
   1  -5  -1  104.22    1.72
   1  -5  -1  103.14    1.71
   1  -5  -1  103.84    1.69
   1  -5  -1  104.74    1.75
  -1   5   1  104.17    1.69
  -1   5   1  103.41    1.85
  -1   5   1  103.67    1.71
  -1   5   1  103.16    1.88
   0  -5  -1  250.29    4.02
   0  -5  -1  248.62    3.93
   0  -5  -1  246.02    3.92
   0  -5  -1  246.93    3.95
   0  -5  -1  250.40    4.11
   0  -5  -1  249.18    3.93
   0   5   1  250.33    3.94
   0   5   1  250.42    3.93
   0   5   1  249.14    4.06
   0   5   1  255.14    4.10
   0   5   1  230.87    3.92
  -1  -5  -1   35.03    0.70
  -1  -5  -1   34.34    0.72
  -1  -5  -1   34.09    0.69
  -1  -5  -1   34.87    0.85
  -1  -5  -1   34.20    0.67
  -1  -5  -1   35.96    0.70
   1   5   1   34.57    0.70
   1   5   1   34.41    0.75
   1   5   1   34.91    0.68
   1   5   1   34.69    0.83
   1   5   1   34.21    0.69
   1   5   1   34.61    0.71
  -2  -5  -1   46.71    0.90
  -2  -5  -1   46.94    0.94
  -2  -5  -1   48.96    0.95
  -2  -5  -1   48.24    0.92
  -2  -5  -1   48.46    1.08
  -2  -5  -1   47.33    0.93
   2   5   1   47.90    0.94
   2   5   1   47.76    1.05
   2   5   1   47.42    0.94
   2   5   1   46.91    0.94
  -3  -5  -1  279.04    4.56
  -3  -5  -1  278.22    4.52
  -3  -5  -1  280.99    4.54
  -3  -5  -1  276.61    4.49
  -3  -5  -1  284.70    4.69
  -3  -5  -1  277.41    4.49
   3   5   1  277.67    4.52
   3   5   1  281.18    4.55
   3   5   1  277.44    4.49
   3   5   1  285.43    4.65
   3   5   1  273.06    4.50
   3   5   1  276.91    4.53
  -4  -5  -1   57.76    1.22
  -4  -5  -1   56.86    1.18
  -4  -5  -1   57.91    1.13
  -4  -5  -1   57.10    1.13
  -4  -5  -1   57.46    1.29
   4   5   1   56.55    1.18
   4   5   1   56.59    1.12
   4   5   1   58.31    1.20
   4   5   1   56.51    1.13
   4   5   1   58.05    1.27
   4   5   1   58.64    1.17
  -5  -5  -1   90.70    1.80
  -5  -5  -1   88.73    1.83
  -5  -5  -1   92.30    1.70
  -5  -5  -1   91.34    1.73
  -5  -5  -1   91.82    1.76
   5   5   1   94.29    1.81
   5   5   1   91.33    1.74
   5   5   1   90.14    1.67
   5   5   1   91.27    1.69
   5   5   1   90.84    1.82
   5   5   1   91.11    1.76
  -6  -5  -1   31.67    0.85
  -6  -5  -1   32.80    0.91
  -6  -5  -1   31.05    0.85
  -6  -5  -1   32.63    0.85
  -6  -5  -1   30.88    0.94
  -6  -5  -1   31.08    0.95
   6   5   1   32.60    0.90
   6   5   1   32.96    0.94
   6   5   1   31.50    0.88
   6   5   1   31.47    0.79
   6   5   1   31.90    0.82
  -7  -5  -1  136.90    2.50
  -7  -5  -1  137.38    2.61
  -7  -5  -1  135.66    2.51
  -7  -5  -1  135.90    2.51
  -7  -5  -1  134.42    2.56
  -7  -5  -1  131.52    2.63
   7   5   1  136.52    2.47
   7   5   1  136.83    2.55
   7   5   1  133.30    2.43
   7   5   1  137.53    2.56
   7   5   1  133.56    2.53
   7   5   1  135.56    2.62
  -8  -5  -1    0.41    0.35
  -8  -5  -1    0.32    0.31
  -8  -5  -1    0.25    0.36
  -8  -5  -1    0.49    0.31
  -8  -5  -1    0.33    0.34
  -8  -5  -1   -0.07    0.36
   8   5   1    0.32    0.29
   8   5   1    0.25    0.24
   8   5   1   -0.03    0.38
   8   5   1    0.74    0.35
   8   5   1    0.15    0.36
   8   5   1   -0.19    0.65
  -9  -5  -1    2.84    0.53
  -9  -5  -1    2.01    0.48
  -9  -5  -1    1.55    0.47
  -9  -5  -1    2.14    0.49
  -9  -5  -1    2.28    0.44
  -9  -5  -1    2.04    0.45
   9   5   1    1.42    0.45
   9   5   1    2.68    0.48
   9   5   1    1.63    0.41
   9   5   1    2.64    0.38
   9   5   1    2.00    0.48
   9   5   1    2.74    0.51
 -10  -5  -1   42.45    1.50
 -10  -5  -1   44.76    1.36
 -10  -5  -1   44.80    1.44
 -10  -5  -1   44.84    1.33
 -10  -5  -1   41.03    1.41
  10   5   1   43.93    1.33
  10   5   1   42.75    1.52
  10   5   1   47.36    1.42
  10   5   1   44.45    1.27
  10   5   1   45.51    1.22
  10   5   1   46.64    1.47
 -11  -5  -1   10.15    1.15
 -11  -5  -1   12.63    1.02
 -11  -5  -1   13.83    1.67
 -11  -5  -1   12.94    0.96
 -11  -5  -1   11.45    1.17
  11   5   1   12.95    0.90
  11   5   1   11.65    1.14
  11   5   1   13.51    0.83
  11   5   1   11.61    0.95
  11   5   1   13.64    1.06
 -12  -5  -1    5.97    0.76
 -12  -5  -1    4.92    0.73
 -12  -5  -1    5.28    0.88
  12   5   1    4.16    0.59
  12   5   1    3.31    0.93
  12   5   1    4.60    0.79
  12   5   1    4.70    0.66
 -13  -5  -1    3.65    0.82
 -13  -5  -1    5.61    1.01
 -13  -5  -1    5.54    0.84
  13   5   1    5.36    0.74
  13   5   1    6.77    0.89
  13   5   1    3.74    0.91
  13   5   1    4.95    1.42
  12  -6  -1    7.95    0.93
  12  -6  -1    8.27    0.83
 -12   6   1    8.19    0.86
 -12   6   1    8.93    1.04
  11  -6  -1    9.52    0.73
  11  -6  -1   10.19    1.15
  11  -6  -1   10.06    1.07
  11  -6  -1    9.86    0.95
 -11   6   1   10.00    1.05
 -11   6   1   10.09    1.02
 -11   6   1    9.31    0.76
  10  -6  -1    1.71    0.59
  10  -6  -1    2.02    0.39
  10  -6  -1    2.50    0.51
  10  -6  -1    1.86    0.54
  10  -6  -1    2.34    0.74
 -10   6   1    2.23    0.56
 -10   6   1    1.72    0.39
 -10   6   1    1.73    0.63
   9  -6  -1    0.07    0.43
   9  -6  -1    0.17    0.30
   9  -6  -1    0.85    0.40
   9  -6  -1    0.19    0.50
   9  -6  -1    0.12    0.41
   9  -6  -1    0.77    0.44
  -9   6   1    0.87    0.33
  -9   6   1    1.37    0.45
  -9   6   1    0.56    0.50
   8  -6  -1    7.83    0.96
   8  -6  -1    9.96    0.66
   8  -6  -1    9.40    0.79
   8  -6  -1    7.89    0.54
   8  -6  -1    9.16    0.68
  -8   6   1    7.30    0.73
  -8   6   1    8.69    0.77
  -8   6   1    8.15    0.66
   7  -6  -1   16.24    0.58
   7  -6  -1   15.78    0.79
   7  -6  -1   15.48    0.55
   7  -6  -1   15.31    0.79
   7  -6  -1   16.44    0.69
   7  -6  -1   15.26    0.66
  -7   6   1   16.55    0.67
  -7   6   1   15.62    0.54
  -7   6   1   15.76    0.79
   6  -6  -1    6.56    0.47
   6  -6  -1    6.92    0.56
   6  -6  -1    6.78    0.59
   6  -6  -1    7.10    0.40
   6  -6  -1    7.15    0.39
   6  -6  -1    7.12    0.39
   6  -6  -1    6.73    0.47
  -6   6   1    7.07    0.57
  -6   6   1    7.06    0.49
  -6   6   1    7.32    0.37
   5  -6  -1    7.80    0.40
   5  -6  -1    8.66    0.57
   5  -6  -1    8.46    0.51
   5  -6  -1    7.90    0.41
   5  -6  -1    8.54    0.36
   5  -6  -1    8.53    0.44
   5  -6  -1    8.80    0.42
  -5   6   1    8.16    0.42
  -5   6   1    8.54    0.34
  -5   6   1    7.57    0.50
   4  -6  -1    1.14    0.17
   4  -6  -1    1.03    0.24
   4  -6  -1    1.04    0.20
   4  -6  -1    1.07    0.23
   4  -6  -1    0.62    0.24
   4  -6  -1    1.07    0.33
   4  -6  -1    1.04    0.21
  -4   6   1    1.22    0.19
  -4   6   1    0.98    0.15
  -4   6   1    0.84    0.23
   3  -6  -1  118.97    1.94
   3  -6  -1  116.98    2.20
   3  -6  -1  116.58    1.95
   3  -6  -1  118.50    2.07
   3  -6  -1  114.12    1.97
   3  -6  -1  117.96    2.10
  -3   6   1  116.23    1.92
  -3   6   1  116.10    1.93
   2  -6  -1    0.47    0.14
   2  -6  -1    0.41    0.21
   2  -6  -1    0.32    0.20
   2  -6  -1    0.65    0.12
   2  -6  -1    0.45    0.14
   2  -6  -1    0.31    0.16
  -2   6   1    0.21    0.12
  -2   6   1    0.44    0.11
   1  -6  -1    0.34    0.16
   1  -6  -1    0.27    0.14
   1  -6  -1    0.10    0.10
   1  -6  -1    0.15    0.11
   1  -6  -1    0.05    0.19
   1  -6  -1    0.48    0.21
   1  -6  -1    0.17    0.15
  -1   6   1    0.35    0.11
  -1   6   1    0.25    0.19
  -1   6   1    0.09    0.21
  -1   6   1    0.12    0.12
   0  -6  -1   26.23    0.60
   0  -6  -1   26.78    0.56
   0  -6  -1   25.73    0.56
   0  -6  -1   26.00    0.65
   0  -6  -1   25.68    0.57
   0  -6  -1   27.10    0.76
   0   6   1   26.31    0.56
   0   6   1   27.01    0.55
   0   6   1   26.86    0.71
   0   6   1   26.12    0.73
   0   6   1   26.21    0.57
  -1  -6  -1    1.67    0.18
  -1  -6  -1    1.41    0.16
  -1  -6  -1    1.83    0.28
  -1  -6  -1    1.84    0.19
  -1  -6  -1    1.63    0.18
  -1  -6  -1    1.63    0.20
   1   6   1    1.80    0.21
   1   6   1    1.51    0.19
   1   6   1    1.69    0.24
   1   6   1    1.31    0.16
   1   6   1    1.26    0.17
   1   6   1    1.56    0.26
  -2  -6  -1  105.00    1.85
  -2  -6  -1  105.16    1.84
  -2  -6  -1  104.16    1.81
  -2  -6  -1  105.46    2.03
  -2  -6  -1  107.07    1.87
  -2  -6  -1  106.62    1.84
   2   6   1  107.53    1.87
   2   6   1  105.22    1.85
   2   6   1  104.03    1.88
   2   6   1  105.67    1.81
   2   6   1  105.52    2.00
  -3  -6  -1    3.56    0.32
  -3  -6  -1    3.89    0.45
  -3  -6  -1    3.54    0.28
  -3  -6  -1    3.45    0.33
  -3  -6  -1    3.42    0.28
  -3  -6  -1    3.90    0.36
   3   6   1    3.58    0.42
   3   6   1    3.48    0.33
   3   6   1    3.69    0.33
   3   6   1    3.28    0.33
   3   6   1    3.41    0.30
  -4  -6  -1   14.94    0.50
  -4  -6  -1   14.55    0.53
  -4  -6  -1   15.03    0.56
  -4  -6  -1   15.13    0.49
  -4  -6  -1   15.40    0.58
  -4  -6  -1   14.43    0.66
   4   6   1   16.05    0.55
   4   6   1   14.74    0.55
   4   6   1   15.58    0.56
   4   6   1   15.43    0.64
   4   6   1   15.04    0.50
   4   6   1   14.79    0.50
  -5  -6  -1   18.11    0.75
  -5  -6  -1   19.57    0.64
  -5  -6  -1   18.30    0.60
  -5  -6  -1   19.17    0.59
  -5  -6  -1   18.13    0.65
  -5  -6  -1   17.75    0.68
   5   6   1   18.74    0.74
   5   6   1   18.77    0.67
   5   6   1   18.08    0.57
   5   6   1   18.43    0.65
   5   6   1   18.34    0.59
   5   6   1   18.77    0.66
  -6  -6  -1   70.82    1.47
  -6  -6  -1   69.10    1.61
  -6  -6  -1   68.78    1.44
  -6  -6  -1   71.39    1.52
  -6  -6  -1   70.71    1.44
  -6  -6  -1   67.47    1.55
   6   6   1   70.84    1.43
   6   6   1   69.84    1.54
   6   6   1   68.53    1.40
   6   6   1   68.48    1.50
   6   6   1   70.23    1.49
  -7  -6  -1    4.95    0.53
  -7  -6  -1    4.50    0.46
  -7  -6  -1    4.02    0.50
  -7  -6  -1    4.75    0.52
  -7  -6  -1    4.44    0.46
  -7  -6  -1    4.03    0.47
   7   6   1    4.67    0.56
   7   6   1    4.23    0.47
   7   6   1    4.33    0.43
   7   6   1    4.73    0.57
   7   6   1    4.58    0.51
   7   6   1    4.29    0.48
  -8  -6  -1   11.84    0.78
  -8  -6  -1   10.34    0.71
  -8  -6  -1    9.90    0.77
  -8  -6  -1   10.66    0.70
  -8  -6  -1   10.87    0.82
  -8  -6  -1   10.83    0.69
   8   6   1   10.93    0.79
   8   6   1   10.24    0.75
   8   6   1   11.74    0.76
   8   6   1   10.33    0.58
   8   6   1   10.86    0.78
   8   6   1   11.24    0.63
  -9  -6  -1   32.26    1.25
  -9  -6  -1   35.63    1.23
  -9  -6  -1   33.37    1.12
  -9  -6  -1   33.20    1.27
  -9  -6  -1   33.39    1.11
  -9  -6  -1   32.31    1.15
   9   6   1   32.42    1.19
   9   6   1   34.49    1.18
   9   6   1   31.59    1.18
   9   6   1   33.85    1.04
   9   6   1   33.52    1.00
   9   6   1   31.22    1.23
 -10  -6  -1   60.96    1.77
 -10  -6  -1   64.09    1.84
 -10  -6  -1   64.70    1.64
 -10  -6  -1   61.78    1.73
 -10  -6  -1   63.04    1.73
  10   6   1   60.63    1.66
  10   6   1   64.95    1.78
  10   6   1   59.21    1.83
  10   6   1   63.50    1.57
  10   6   1   62.84    1.51
  10   6   1   61.88    1.69
 -11  -6  -1    7.38    0.78
 -11  -6  -1    7.96    0.93
 -11  -6  -1    6.84    0.84
 -11  -6  -1    6.78    0.81
  11   6   1    5.25    0.54
  11   6   1    8.83    1.06
  11   6   1    5.96    0.72
  11   6   1    6.22    0.76
  11   6   1    8.21    0.79
 -12  -6  -1   13.08    1.44
 -12  -6  -1   14.14    1.35
 -12  -6  -1   10.99    1.19
  12   6   1   12.32    1.05
  12   6   1   14.65    1.49
  12   6   1   11.95    1.32
  12   6   1   13.05    0.97
 -13  -6  -1    3.79    0.83
 -13  -6  -1    3.91    1.06
 -13  -6  -1    3.00    0.86
  13   6   1    4.74    1.29
  13   6   1    2.46    0.89
  13   6   1    3.36    0.66
  13   6   1    3.55    0.70
  12  -7  -1    2.20    0.54
  12  -7  -1    2.55    0.85
 -12   7   1    3.54    0.56
 -12   7   1    1.93    0.92
  11  -7  -1    1.30    0.70
  11  -7  -1    0.68    0.59
  11  -7  -1    1.16    0.71
  11  -7  -1    1.33    0.43
 -11   7   1    2.03    0.82
 -11   7   1    1.45    0.64
 -11   7   1    1.43    0.45
  10  -7  -1   20.14    0.91
  10  -7  -1   21.16    1.32
  10  -7  -1   22.79    1.15
  10  -7  -1   21.70    1.18
  10  -7  -1   22.60    0.84
 -10   7   1   20.00    1.01
 -10   7   1   21.30    1.24
 -10   7   1   20.49    0.81
   9  -7  -1   36.31    1.05
   9  -7  -1   39.56    1.37
   9  -7  -1   37.85    1.22
   9  -7  -1   38.11    1.00
   9  -7  -1   36.70    1.25
   9  -7  -1   38.97    1.36
  -9   7   1   36.77    0.97
  -9   7   1   37.97    1.14
  -9   7   1   37.78    1.33
   8  -7  -1   11.12    0.85
   8  -7  -1    9.14    0.51
   8  -7  -1    9.83    0.71
   8  -7  -1    8.91    0.58
   8  -7  -1    9.48    0.71
   8  -7  -1    9.23    0.83
  -8   7   1    9.37    0.50
  -8   7   1    7.74    0.65
  -8   7   1    8.53    0.79
   7  -7  -1   34.96    0.82
   7  -7  -1   34.05    0.84
   7  -7  -1   35.06    1.15
   7  -7  -1   35.24    0.98
   7  -7  -1   33.13    0.92
   7  -7  -1   35.60    0.85
   7  -7  -1   36.27    1.12
   7  -7  -1   32.71    0.81
  -7   7   1   34.92    1.09
  -7   7   1   35.95    0.93
  -7   7   1   34.46    0.80
   6  -7  -1    6.93    0.47
   6  -7  -1    6.77    0.46
   6  -7  -1    7.97    0.64
   6  -7  -1    7.19    0.49
   6  -7  -1    6.64    0.46
   6  -7  -1    7.16    0.40
  -6   7   1    7.22    0.36
  -6   7   1    7.46    0.60
  -6   7   1    7.08    0.46
   5  -7  -1   69.73    1.26
   5  -7  -1   69.42    1.30
   5  -7  -1   69.53    1.39
   5  -7  -1   69.33    1.35
   5  -7  -1   67.90    1.37
   5  -7  -1   68.20    1.47
   5  -7  -1   68.92    1.60
   5  -7  -1   68.84    1.63
  -5   7   1   68.36    1.28
  -5   7   1   69.19    1.47
  -5   7   1   70.07    1.23
   4  -7  -1   12.58    0.45
   4  -7  -1   12.49    0.67
   4  -7  -1   12.80    0.41
   4  -7  -1   12.88    0.55
   4  -7  -1   12.48    0.54
   4  -7  -1   12.68    0.64
   4  -7  -1   12.57    0.51
   4  -7  -1   12.35    0.38
  -4   7   1   12.46    0.39
  -4   7   1   12.55    0.36
   3  -7  -1   -0.01    0.19
   3  -7  -1   -0.13    0.13
   3  -7  -1    0.01    0.22
   3  -7  -1    0.00    0.15
   3  -7  -1    0.30    0.16
  -3   7   1    0.06    0.12
   2  -7  -1   74.31    1.24
   2  -7  -1   72.94    1.50
   2  -7  -1   71.77    1.36
   2  -7  -1   71.73    1.28
   2  -7  -1   72.28    1.50
   2  -7  -1   71.85    1.38
   2  -7  -1   72.64    1.27
  -2   7   1   72.48    1.26
  -2   7   1   73.53    1.22
   1  -7  -1    3.88    0.31
   1  -7  -1    4.18    0.43
   1  -7  -1    3.88    0.23
   1  -7  -1    3.92    0.23
   1  -7  -1    3.49    0.30
   1  -7  -1    2.94    0.30
   1  -7  -1    3.53    0.26
  -1   7   1    3.90    0.42
  -1   7   1    3.47    0.22
  -1   7   1    3.46    0.26
   0  -7  -1  357.44    5.64
   0  -7  -1  356.83    5.65
   0  -7  -1  354.42    5.76
   0  -7  -1  346.15    5.62
   0  -7  -1  358.09    5.69
   0  -7  -1  355.85    5.90
   0   7   1  354.64    5.62
   0   7   1  367.59    5.88
   0   7   1  358.42    5.63
   0   7   1  358.20    5.84
   0   7   1  353.23    5.65
  -1  -7  -1   13.06    0.61
  -1  -7  -1   12.88    0.39
  -1  -7  -1   12.61    0.45
  -1  -7  -1   13.16    0.43
  -1  -7  -1   12.70    0.41
  -1  -7  -1   13.37    0.42
   1   7   1   13.47    0.47
   1   7   1   13.00    0.42
   1   7   1   13.19    0.59
   1   7   1   13.70    0.52
   1   7   1   13.20    0.41
  -2  -7  -1    2.94    0.27
  -2  -7  -1    2.86    0.35
  -2  -7  -1    3.48    0.31
  -2  -7  -1    3.68    0.31
  -2  -7  -1    3.84    0.32
  -2  -7  -1    2.94    0.30
   2   7   1    2.84    0.30
   2   7   1    3.71    0.34
   2   7   1    2.84    0.33
   2   7   1    2.98    0.33
   2   7   1    3.33    0.29
   2   7   1    3.55    0.31
  -3  -7  -1   55.27    1.12
  -3  -7  -1   54.56    1.16
  -3  -7  -1   52.71    1.08
  -3  -7  -1   55.18    1.34
  -3  -7  -1   54.37    1.09
  -3  -7  -1   55.77    1.14
   3   7   1   53.51    1.29
   3   7   1   54.77    1.16
   3   7   1   54.55    1.14
   3   7   1   54.46    1.14
   3   7   1   53.58    1.08
  -4  -7  -1    1.44    0.26
  -4  -7  -1    1.23    0.23
  -4  -7  -1    1.37    0.28
  -4  -7  -1    0.82    0.32
  -4  -7  -1    1.63    0.24
  -4  -7  -1    1.42    0.28
   4   7   1    1.48    0.27
   4   7   1    1.69    0.29
   4   7   1    1.41    0.26
   4   7   1    0.80    0.18
   4   7   1    0.98    0.23
  -5  -7  -1   15.24    0.57
  -5  -7  -1   16.23    0.58
  -5  -7  -1   14.16    0.74
  -5  -7  -1   17.11    0.67
  -5  -7  -1   15.68    0.79
  -5  -7  -1   16.06    0.66
   5   7   1   15.23    0.75
   5   7   1   15.70    0.66
   5   7   1   16.54    0.64
   5   7   1   15.73    0.57
   5   7   1   15.95    0.65
   5   7   1   16.39    0.60
  -6  -7  -1   14.60    0.65
  -6  -7  -1   15.50    0.82
  -6  -7  -1   16.64    0.64
  -6  -7  -1   15.77    0.74
  -6  -7  -1   16.09    0.63
  -6  -7  -1   14.75    0.88
   6   7   1   14.04    0.68
   6   7   1   15.95    0.65
   6   7   1   14.56    0.59
   6   7   1   15.63    0.81
   6   7   1   15.17    0.70
   6   7   1   15.04    0.72
  -7  -7  -1   28.50    0.91
  -7  -7  -1   27.61    0.88
  -7  -7  -1   26.05    0.87
  -7  -7  -1   27.73    1.07
  -7  -7  -1   26.69    0.99
  -7  -7  -1   28.57    0.99
   7   7   1   28.22    0.87
   7   7   1   28.18    1.00
   7   7   1   27.33    0.94
   7   7   1   26.37    1.02
   7   7   1   28.50    0.96
   7   7   1   26.83    0.81
  -8  -7  -1    0.61    0.34
  -8  -7  -1    0.17    0.42
  -8  -7  -1    0.21    0.37
  -8  -7  -1    0.84    0.36
  -8  -7  -1    0.57    0.46
  -8  -7  -1    0.58    0.40
   8   7   1    0.25    0.42
   8   7   1   -0.44    0.29
   8   7   1    0.71    0.45
   8   7   1    0.17    0.41
   8   7   1    0.08    0.44
   8   7   1    0.42    0.29
  -9  -7  -1    3.52    0.62
  -9  -7  -1    3.00    0.51
  -9  -7  -1    2.61    0.95
  -9  -7  -1    2.96    0.59
  -9  -7  -1    3.17    0.52
  -9  -7  -1    2.96    0.59
   9   7   1    3.31    0.60
   9   7   1    3.60    0.54
   9   7   1    2.55    0.60
   9   7   1    2.92    0.47
   9   7   1    3.10    0.54
   9   7   1    2.82    0.73
 -10  -7  -1   19.57    1.17
 -10  -7  -1   18.90    1.01
 -10  -7  -1   18.02    1.08
 -10  -7  -1   15.36    1.15
 -10  -7  -1   19.65    1.17
 -10  -7  -1   18.21    1.14
  10   7   1   16.53    0.92
  10   7   1   18.63    1.12
  10   7   1   18.76    1.13
  10   7   1   14.15    1.16
  10   7   1   18.26    1.22
  10   7   1   18.46    0.87
 -11  -7  -1   11.10    1.33
 -11  -7  -1   11.71    1.11
 -11  -7  -1   10.28    1.05
 -11  -7  -1    9.95    1.18
  11   7   1   11.09    1.12
  11   7   1   10.49    1.27
  11   7   1    9.96    0.96
  11   7   1    9.63    0.88
  11   7   1   10.15    0.89
 -12  -7  -1    1.03    0.82
 -12  -7  -1    1.04    0.85
 -12  -7  -1    1.39    0.76
 -12  -7  -1    2.72    0.76
  12   7   1    1.85    0.59
  12   7   1    1.54    0.58
  12   7   1    3.48    1.13
  12   7   1    0.16    0.73
 -13  -7  -1    3.86    0.93
 -13  -7  -1    1.48    0.83
 -13  -7  -1    2.01    1.02
  13   7   1    1.41    0.70
  13   7   1    2.60    1.01
  13   7   1    0.34    0.82
  11  -8  -1    9.12    1.10
  11  -8  -1    8.68    0.90
  11  -8  -1    8.83    0.75
 -11   8   1   10.67    1.33
 -11   8   1   10.13    0.74
 -11   8   1   11.54    1.06
  10  -8  -1    1.80    0.64
  10  -8  -1    1.20    0.60
  10  -8  -1    2.37    0.76
  10  -8  -1    1.85    0.39
  10  -8  -1    1.26    0.48
 -10   8   1    1.95    0.54
 -10   8   1    1.90    0.70
 -10   8   1    1.33    0.38
   9  -8  -1   12.82    0.73
   9  -8  -1   12.36    0.91
   9  -8  -1   13.04    1.06
   9  -8  -1   13.99    0.66
   9  -8  -1   13.63    1.05
  -9   8   1   13.33    0.82
  -9   8   1   13.64    0.63
  -9   8   1   12.12    1.00
   8  -8  -1    7.24    0.70
   8  -8  -1    7.72    0.51
   8  -8  -1    7.47    0.69
   8  -8  -1    8.10    0.73
   8  -8  -1    9.15    0.88
   8  -8  -1    6.52    0.67
  -8   8   1    7.83    0.81
  -8   8   1    8.09    0.48
  -8   8   1    8.00    0.64
   7  -8  -1    1.13    0.34
   7  -8  -1    1.46    0.59
   7  -8  -1    1.20    0.31
   7  -8  -1    1.12    0.31
   7  -8  -1    1.39    0.57
   7  -8  -1    1.90    0.46
   7  -8  -1    1.63    0.29
   7  -8  -1    1.20    0.35
  -7   8   1    1.55    0.29
  -7   8   1    1.42    0.44
  -7   8   1    1.70    0.32
   6  -8  -1   27.54    0.82
   6  -8  -1   27.77    0.83
   6  -8  -1   28.36    1.06
   6  -8  -1   27.86    0.95
   6  -8  -1   28.50    0.69
   6  -8  -1   28.32    0.74
   6  -8  -1   27.62    0.81
   6  -8  -1   27.60    1.14
  -6   8   1   27.68    0.63
   5  -8  -1    0.77    0.19
   5  -8  -1    0.33    0.28
   5  -8  -1    0.48    0.22
   5  -8  -1    0.56    0.29
   5  -8  -1    0.66    0.36
   5  -8  -1    0.78    0.32
   5  -8  -1    0.02    0.22
   5  -8  -1    0.46    0.40
   4  -8  -1    3.43    0.34
   4  -8  -1    3.13    0.36
   4  -8  -1    2.26    0.40
   4  -8  -1    3.14    0.36
   4  -8  -1    3.22    0.35
   3  -8  -1    5.05    0.29
   3  -8  -1    5.82    0.42
   3  -8  -1    6.21    0.51
   3  -8  -1    5.16    0.32
   3  -8  -1    5.73    0.56
   2  -8  -1   73.12    1.42
   2  -8  -1   75.24    1.30
   2  -8  -1   73.68    1.31
   2  -8  -1   71.49    1.42
   2  -8  -1   72.04    1.55
   2  -8  -1   74.66    1.58
   2  -8  -1   75.85    1.27
   1  -8  -1    6.46    0.38
   1  -8  -1    6.12    0.54
   1  -8  -1    5.65    0.47
   1  -8  -1    5.70    0.38
   1  -8  -1    5.66    0.29
   1  -8  -1    5.61    0.33
  -1   8   1    5.79    0.27
  -1   8   1    5.26    0.31
  -1   8   1    6.49    0.53
   0  -8  -1  130.80    2.21
   0  -8  -1  133.67    2.53
   0  -8  -1  132.16    2.25
   0  -8  -1  134.37    2.38
   0  -8  -1  131.31    2.29
   0   8   1  133.99    2.50
   0   8   1  135.83    2.47
   0   8   1  131.15    2.24
   0   8   1  133.01    2.21
   0   8   1  132.49    2.21
  -1  -8  -1   25.77    0.64
  -1  -8  -1   26.30    0.71
  -1  -8  -1   26.17    0.65
  -1  -8  -1   27.23    0.67
  -1  -8  -1   27.11    0.89
   1   8   1   26.91    0.79
   1   8   1   28.11    0.64
   1   8   1   26.70    0.65
   1   8   1   26.56    0.65
   1   8   1   27.37    0.72
   1   8   1   27.78    0.90
  -2  -8  -1   11.97    0.47
  -2  -8  -1   12.02    0.48
  -2  -8  -1   12.48    0.67
  -2  -8  -1   10.33    0.55
  -2  -8  -1   11.69    0.43
  -2  -8  -1   11.40    0.46
   2   8   1   11.55    0.65
   2   8   1   11.93    0.50
   2   8   1   11.81    0.48
   2   8   1   11.68    0.44
   2   8   1   11.16    0.46
   2   8   1   11.26    0.52
  -3  -8  -1   27.12    0.74
  -3  -8  -1   27.17    0.76
  -3  -8  -1   25.50    0.71
  -3  -8  -1   24.28    0.79
  -3  -8  -1   25.49    0.67
  -3  -8  -1   26.06    0.94
   3   8   1   25.63    0.68
   3   8   1   26.25    0.73
   3   8   1   25.94    0.75
   3   8   1   26.15    0.77
   3   8   1   24.86    0.90
  -4  -8  -1    6.30    0.49
  -4  -8  -1    5.84    0.64
  -4  -8  -1    6.03    0.46
  -4  -8  -1    5.78    0.49
  -4  -8  -1    5.55    0.41
  -4  -8  -1    5.66    0.42
   4   8   1    4.17    0.46
   4   8   1    5.66    0.43
   4   8   1    5.67    0.48
   4   8   1    5.10    0.48
   4   8   1    5.45    0.45
  -5  -8  -1   18.61    0.64
  -5  -8  -1   16.92    0.73
  -5  -8  -1   17.51    0.63
  -5  -8  -1   17.51    0.70
  -5  -8  -1   17.28    0.73
  -5  -8  -1   17.95    0.88
   5   8   1   19.27    0.89
   5   8   1   17.35    0.69
   5   8   1   15.98    0.62
   5   8   1   18.29    0.71
   5   8   1   17.56    0.65
  -6  -8  -1    1.69    0.34
  -6  -8  -1    1.37    0.33
  -6  -8  -1    1.23    0.37
  -6  -8  -1    0.63    0.26
  -6  -8  -1    1.52    0.45
  -6  -8  -1    1.33    0.36
   6   8   1    1.22    0.40
   6   8   1    0.82    0.34
   6   8   1    0.62    0.28
   6   8   1    0.25    0.35
   6   8   1    0.68    0.42
  -7  -8  -1    3.04    0.41
  -7  -8  -1    3.85    0.53
  -7  -8  -1    3.83    0.49
  -7  -8  -1    3.37    0.57
  -7  -8  -1    3.28    0.42
  -7  -8  -1    3.23    0.51
   7   8   1    3.11    0.44
   7   8   1    2.58    0.41
   7   8   1    3.06    0.47
   7   8   1    3.01    0.50
   7   8   1    2.49    0.54
   7   8   1    3.47    0.39
  -8  -8  -1    6.80    0.71
  -8  -8  -1    6.36    0.70
  -8  -8  -1    7.24    0.72
  -8  -8  -1    5.47    0.60
  -8  -8  -1    7.87    0.84
  -8  -8  -1    6.20    0.69
   8   8   1    5.81    0.64
   8   8   1    5.60    0.59
   8   8   1    6.40    0.65
   8   8   1    6.54    0.65
   8   8   1    6.54    0.59
   8   8   1    6.30    0.59
  -9  -8  -1   16.34    1.06
  -9  -8  -1   16.24    0.97
  -9  -8  -1   15.52    1.06
  -9  -8  -1   16.22    0.94
  -9  -8  -1   14.96    0.98
  -9  -8  -1   15.32    1.09
   9   8   1   15.42    1.08
   9   8   1   16.05    0.81
   9   8   1   14.82    1.00
   9   8   1   16.18    0.86
   9   8   1   13.64    1.05
   9   8   1   15.85    1.04
 -10  -8  -1    1.73    0.59
 -10  -8  -1    1.42    0.57
 -10  -8  -1    1.02    0.64
 -10  -8  -1    1.10    0.57
 -10  -8  -1    2.27    0.72
 -10  -8  -1    0.95    0.63
  10   8   1    1.02    0.67
  10   8   1    1.53    0.66
  10   8   1    1.21    0.68
  10   8   1    1.05    0.58
  10   8   1    0.75    0.46
  10   8   1    0.34    0.43
 -11  -8  -1    0.51    0.74
 -11  -8  -1   -0.59    0.59
 -11  -8  -1   -0.53    0.79
 -11  -8  -1    0.13    0.78
  11   8   1   -0.47    0.56
  11   8   1    0.06    0.74
  11   8   1    0.03    0.50
  11   8   1    0.84    0.79
  11   8   1   -0.36    0.70
 -12  -8  -1    1.46    0.79
 -12  -8  -1    0.08    0.73
 -12  -8  -1   -0.86    0.90
 -12  -8  -1   -0.23    0.79
  12   8   1   -0.44    0.65
  12   8   1    1.86    0.98
  12   8   1    0.14    0.83
  11  -9  -1    1.54    0.76
  11  -9  -1    0.55    0.44
 -11   9   1    0.32    0.42
 -11   9   1    0.36    0.84
 -11   9   1   -0.68    1.01
  10  -9  -1    7.74    0.83
  10  -9  -1    8.01    0.92
  10  -9  -1    6.33    0.91
  10  -9  -1    6.33    0.75
  10  -9  -1    5.84    0.62
 -10   9   1    5.55    0.59
 -10   9   1    5.90    0.58
 -10   9   1    7.04    0.86
   9  -9  -1    1.55    0.68
   9  -9  -1    0.37    0.32
   9  -9  -1    0.11    0.38
   9  -9  -1   -0.10    0.59
   9  -9  -1    0.56    0.48
  -9   9   1    0.22    0.29
  -9   9   1    0.20    0.40
   8  -9  -1    5.22    0.50
   8  -9  -1    3.78    0.62
   8  -9  -1    5.20    0.57
   8  -9  -1    5.38    0.59
   8  -9  -1    4.50    0.52
   8  -9  -1    5.66    0.62
   8  -9  -1    5.37    0.52
   8  -9  -1    4.99    0.65
  -8   9   1    5.11    0.54
   7  -9  -1   10.74    0.85
   7  -9  -1    9.87    0.64
   7  -9  -1    9.94    0.91
   7  -9  -1    9.75    0.58
   7  -9  -1   10.27    0.68
   7  -9  -1   10.10    0.64
   7  -9  -1   10.23    0.90
   7  -9  -1   10.05    0.50
   6  -9  -1   12.56    0.77
   6  -9  -1   13.06    0.99
   6  -9  -1   11.48    0.68
   6  -9  -1   11.63    0.69
   6  -9  -1   12.77    0.97
   6  -9  -1   11.94    0.59
   5  -9  -1   10.30    0.50
   5  -9  -1    9.60    0.65
   5  -9  -1    9.20    0.63
   5  -9  -1   12.23    0.88
   5  -9  -1   10.35    0.66
   5  -9  -1   10.67    0.77
   4  -9  -1   -0.38    0.29
   4  -9  -1   -0.04    0.20
   4  -9  -1   -0.09    0.27
   4  -9  -1    0.17    0.39
   3  -9  -1   23.48    0.74
   3  -9  -1   24.38    0.58
   3  -9  -1   24.58    0.86
   3  -9  -1   23.77    0.74
   3  -9  -1   23.79    0.90
   2  -9  -1    1.33    0.34
   2  -9  -1    1.55    0.21
   2  -9  -1    1.34    0.26
   2  -9  -1    0.81    0.34
   2  -9  -1    1.30    0.18
   2  -9  -1    1.24    0.18
   2  -9  -1    1.20    0.26
   1  -9  -1    9.32    0.47
   1  -9  -1   10.20    0.37
   1  -9  -1    9.42    0.46
   1  -9  -1    9.72    0.64
   1  -9  -1    9.14    0.35
   1  -9  -1   10.55    0.58
   1  -9  -1   10.08    0.41
  -1   9   1    9.66    0.34
  -1   9   1    9.49    0.65
  -1   9   1    9.86    0.40
   0  -9  -1    6.91    0.64
   0  -9  -1    8.13    0.43
   0  -9  -1    8.08    0.35
   0  -9  -1    7.80    0.40
   0  -9  -1    7.98    0.38
   0  -9  -1    9.08    0.52
   0   9   1    8.18    0.37
   0   9   1    8.65    0.36
   0   9   1    9.32    0.60
   0   9   1    7.22    0.40
  -1  -9  -1    2.44    0.24
  -1  -9  -1    2.45    0.28
  -1  -9  -1    3.60    0.46
  -1  -9  -1    2.97    0.30
  -1  -9  -1    3.12    0.32
  -1  -9  -1    3.14    0.29
   1   9   1    2.91    0.26
   1   9   1    3.31    0.42
   1   9   1    3.49    0.38
   1   9   1    2.78    0.34
   1   9   1    3.25    0.32
   1   9   1    2.98    0.29
  -2  -9  -1    4.38    0.39
  -2  -9  -1    4.33    0.39
  -2  -9  -1    3.86    0.41
  -2  -9  -1    3.98    0.35
  -2  -9  -1    3.67    0.38
  -2  -9  -1    3.20    0.44
   2   9   1    3.97    0.47
   2   9   1    4.66    0.44
   2   9   1    3.68    0.39
   2   9   1    3.99    0.36
   2   9   1    3.61    0.40
   2   9   1    3.93    0.47
  -3  -9  -1    7.55    0.47
  -3  -9  -1    7.27    0.47
  -3  -9  -1    6.74    0.68
  -3  -9  -1    7.17    0.49
  -3  -9  -1    7.09    0.46
  -3  -9  -1    6.37    0.41
   3   9   1    6.88    0.48
   3   9   1    5.81    0.52
   3   9   1    6.70    0.47
   3   9   1    6.06    0.64
   3   9   1    7.08    0.52
   3   9   1    6.81    0.44
  -4  -9  -1   10.62    0.53
  -4  -9  -1   10.22    0.52
  -4  -9  -1    9.65    0.60
  -4  -9  -1   10.67    0.59
  -4  -9  -1   10.17    0.80
  -4  -9  -1    8.89    0.54
   4   9   1   10.25    0.62
   4   9   1   11.09    0.60
   4   9   1   10.48    0.57
   4   9   1    9.73    0.52
   4   9   1   10.30    0.78
  -5  -9  -1    1.02    0.35
  -5  -9  -1    1.64    0.39
  -5  -9  -1    1.35    0.30
  -5  -9  -1    1.60    0.44
  -5  -9  -1    1.60    0.34
  -5  -9  -1    1.21    0.30
   5   9   1    1.57    0.32
   5   9   1    1.66    0.39
   5   9   1    2.10    0.38
   5   9   1    0.88    0.34
   5   9   1    2.03    0.47
  -6  -9  -1   20.28    1.04
  -6  -9  -1   19.98    0.77
  -6  -9  -1   19.85    0.89
  -6  -9  -1   20.81    0.89
  -6  -9  -1   20.97    0.85
  -6  -9  -1   20.39    0.77
   6   9   1   21.47    0.86
   6   9   1   21.70    1.05
   6   9   1   22.24    0.92
   6   9   1   21.31    0.79
   6   9   1   21.86    0.87
   6   9   1   20.85    0.77
  -7  -9  -1    2.37    0.40
  -7  -9  -1    2.75    0.57
  -7  -9  -1    3.33    0.53
  -7  -9  -1    2.82    0.45
  -7  -9  -1    2.97    0.49
  -7  -9  -1    2.26    0.47
   7   9   1    2.16    0.40
   7   9   1    2.12    0.49
   7   9   1    1.83    0.55
   7   9   1    2.34    0.48
   7   9   1    2.75    0.40
   7   9   1    2.50    0.47
  -8  -9  -1    0.70    0.54
  -8  -9  -1    0.21    0.41
  -8  -9  -1    0.16    0.46
  -8  -9  -1    0.58    0.49
  -8  -9  -1    0.39    0.44
  -8  -9  -1    0.34    0.41
   8   9   1    0.87    0.45
   8   9   1    0.46    0.55
   8   9   1    0.59    0.46
   8   9   1    0.36    0.45
   8   9   1   -0.03    0.51
  -9  -9  -1    6.09    0.71
  -9  -9  -1    5.74    0.71
  -9  -9  -1    6.03    0.72
  -9  -9  -1    5.89    0.64
  -9  -9  -1    6.67    0.70
   9   9   1    5.45    0.71
   9   9   1    6.23    0.71
   9   9   1    6.61    0.72
   9   9   1    6.49    0.77
   9   9   1    6.75    0.75
   9   9   1    4.75    0.74
 -10  -9  -1    1.95    0.65
 -10  -9  -1    1.99    0.61
 -10  -9  -1    0.07    0.71
 -10  -9  -1    0.84    0.68
 -10  -9  -1    1.27    0.73
  10   9   1    1.61    0.63
  10   9   1    2.43    0.53
  10   9   1    1.85    0.81
  10   9   1    2.41    0.82
  10   9   1    1.90    0.52
 -11  -9  -1    4.16    0.88
 -11  -9  -1    6.12    0.93
 -11  -9  -1    4.82    0.78
 -11  -9  -1    5.59    0.97
  11   9   1    5.43    0.96
  11   9   1    5.08    0.85
  11   9   1    5.33    0.67
  11   9   1    6.50    0.77
 -12  -9  -1   -0.19    0.96
 -12  -9  -1   -1.24    0.83
 -12  -9  -1    0.16    0.82
 -12  -9  -1    0.79    0.91
  12   9   1   -1.05    0.86
  12   9   1    0.23    0.63
  12   9   1   -0.46    0.61
  10 -10  -1    1.01    0.84
  10 -10  -1    0.02    0.64
  10 -10  -1   -0.20    0.71
  10 -10  -1   -0.45    0.37
   9 -10  -1    0.23    0.33
   9 -10  -1    0.58    0.51
   9 -10  -1    2.03    0.74
   9 -10  -1    2.08    0.77
   8 -10  -1    6.09    0.57
   8 -10  -1    6.40    0.80
   8 -10  -1    6.69    0.53
   8 -10  -1    6.22    0.73
   8 -10  -1    6.44    0.74
   8 -10  -1    7.63    0.72
   7 -10  -1    0.29    0.35
   7 -10  -1    0.12    0.52
   7 -10  -1    0.21    0.63
   7 -10  -1    0.76    0.44
   7 -10  -1    0.68    0.51
   7 -10  -1   -0.34    0.37
   6 -10  -1    1.81    0.61
   6 -10  -1    0.32    0.47
   6 -10  -1    1.00    0.42
   6 -10  -1    1.18    0.41
   6 -10  -1    1.33    0.46
   6 -10  -1    1.07    0.31
   5 -10  -1    0.64    0.45
   5 -10  -1    0.14    0.25
   5 -10  -1    0.52    0.51
   5 -10  -1    0.78    0.39
   4 -10  -1   -0.12    0.31
   4 -10  -1    0.34    0.20
   4 -10  -1   -0.18    0.30
   4 -10  -1    0.68    0.44
   4 -10  -1    0.45    0.36
   4 -10  -1    0.12    0.37
   3 -10  -1   13.13    0.78
   3 -10  -1   12.46    0.60
   3 -10  -1   11.68    0.42
   3 -10  -1   12.25    0.77
   3 -10  -1   12.33    0.61
   2 -10  -1    1.90    0.20
   2 -10  -1    2.17    0.31
   2 -10  -1    2.04    0.40
   2 -10  -1    2.53    0.44
   2 -10  -1    1.52    0.31
   1 -10  -1   40.08    0.96
   1 -10  -1   40.23    1.22
   1 -10  -1   41.36    0.83
   1 -10  -1   39.83    0.87
   1 -10  -1   38.86    0.95
   1 -10  -1   40.17    1.08
   1 -10  -1   38.67    0.81
  -1  10   1   38.21    1.17
  -1  10   1   39.91    0.79
  -1  10   1   39.88    0.85
   0 -10  -1    4.78    0.53
   0 -10  -1    5.02    0.33
   0 -10  -1    4.57    0.51
   0 -10  -1    4.50    0.40
   0 -10  -1    4.81    0.39
   0 -10  -1    4.72    0.37
   0  10   1    4.53    0.35
   0  10   1    5.36    0.54
   0  10   1    5.04    0.38
  -1 -10  -1    2.74    0.35
  -1 -10  -1    3.14    0.37
  -1 -10  -1    3.42    0.33
  -1 -10  -1    3.34    0.32
  -1 -10  -1    2.85    0.50
  -1 -10  -1    3.16    0.34
   1  10   1    3.22    0.36
   1  10   1    2.62    0.43
   1  10   1    2.97    0.30
   1  10   1    3.21    0.38
  -2 -10  -1   33.56    0.95
  -2 -10  -1   36.58    0.90
  -2 -10  -1   37.28    1.22
  -2 -10  -1   36.54    0.94
  -2 -10  -1   36.96    0.93
  -2 -10  -1   35.78    0.89
   2  10   1   35.96    0.89
   2  10   1   35.71    0.89
   2  10   1   35.77    0.97
   2  10   1   38.21    0.87
   2  10   1   35.77    1.18
   2  10   1   36.71    1.06
  -3 -10  -1    2.14    0.51
  -3 -10  -1    2.03    0.33
  -3 -10  -1    2.34    0.30
  -3 -10  -1    2.04    0.33
  -3 -10  -1    3.05    0.37
  -3 -10  -1    2.30    0.36
   3  10   1    2.18    0.31
   3  10   1    2.39    0.39
   3  10   1    1.94    0.47
   3  10   1    2.30    0.30
   3  10   1    2.82    0.40
   3  10   1    2.44    0.37
  -4 -10  -1    8.25    0.59
  -4 -10  -1    7.84    0.60
  -4 -10  -1    8.96    0.63
  -4 -10  -1    9.75    0.57
  -4 -10  -1    8.19    0.54
  -4 -10  -1    8.17    0.83
   4  10   1    7.58    0.55
   4  10   1    7.60    0.78
   4  10   1    7.91    0.60
   4  10   1    8.68    0.57
   4  10   1    7.59    0.82
   4  10   1    8.49    0.61
  -5 -10  -1    0.60    0.31
  -5 -10  -1    0.26    0.34
  -5 -10  -1    0.67    0.35
  -5 -10  -1    0.89    0.40
  -5 -10  -1    1.01    0.32
  -5 -10  -1    0.91    0.50
   5  10   1    0.28    0.38
   5  10   1    1.07    0.42
   5  10   1    0.80    0.37
   5  10   1    0.22    0.46
   5  10   1    0.89    0.33
   5  10   1    0.96    0.34
  -6 -10  -1    0.27    0.39
  -6 -10  -1    0.59    0.39
  -6 -10  -1    0.42    0.35
  -6 -10  -1    0.28    0.51
  -6 -10  -1    0.23    0.40
  -6 -10  -1    0.71    0.34
   6  10   1    0.33    0.53
   6  10   1    0.23    0.39
   6  10   1    0.49    0.44
   6  10   1    0.67    0.40
   6  10   1    0.26    0.31
   6  10   1    0.31    0.33
  -7 -10  -1    4.13    1.04
  -7 -10  -1    4.36    0.58
  -7 -10  -1    4.13    0.55
  -7 -10  -1    5.68    0.67
  -7 -10  -1    5.38    0.60
  -7 -10  -1    4.14    0.54
   7  10   1    4.35    0.52
   7  10   1    3.76    0.55
   7  10   1    5.14    0.62
   7  10   1    4.58    0.56
   7  10   1    3.88    0.54
   7  10   1    5.20    0.71
  -8 -10  -1    0.17    0.51
  -8 -10  -1    0.36    0.45
  -8 -10  -1    0.08    0.60
  -8 -10  -1    0.16    0.53
  -8 -10  -1    0.25    0.49
   8  10   1    0.96    0.55
   8  10   1    1.32    0.46
   8  10   1   -1.06    0.63
   8  10   1    0.19    0.37
   8  10   1    0.98    0.56
   8  10   1    0.48    0.61
  -9 -10  -1    3.81    0.64
  -9 -10  -1    4.74    0.78
  -9 -10  -1    5.78    0.83
  -9 -10  -1    5.10    0.82
  -9 -10  -1    4.72    0.67
  -9 -10  -1    3.52    0.65
   9  10   1    5.86    0.74
   9  10   1    4.88    0.74
   9  10   1    4.24    0.76
   9  10   1    4.71    0.61
   9  10   1    4.43    0.86
   9  10   1    3.77    0.50
 -10 -10  -1    1.02    0.86
 -10 -10  -1    3.04    0.85
 -10 -10  -1    2.04    0.70
 -10 -10  -1    2.83    0.78
 -10 -10  -1    2.33    0.71
  10  10   1    1.75    0.79
  10  10   1    1.91    0.70
  10  10   1    3.15    0.54
  10  10   1    2.52    0.56
 -11 -10  -1   -0.15    0.88
 -11 -10  -1    2.44    1.06
 -11 -10  -1    1.54    0.87
 -11 -10  -1   -0.67    0.75
  11  10   1    0.18    0.57
  11  10   1    0.45    0.83
  11  10   1    0.44    0.61
   9 -11  -1    1.88    0.89
   9 -11  -1   -0.39    0.53
   9 -11  -1   -0.17    0.33
   9 -11  -1    0.55    0.75
   8 -11  -1    4.46    0.76
   8 -11  -1    4.91    0.61
   8 -11  -1    5.13    0.79
   8 -11  -1    3.72    0.62
   8 -11  -1    6.79    0.76
   8 -11  -1    4.06    0.39
   7 -11  -1   11.00    1.09
   7 -11  -1    9.57    0.67
   7 -11  -1    8.98    0.85
   7 -11  -1   10.05    1.00
   6 -11  -1    0.36    0.63
   6 -11  -1    0.68    0.55
   6 -11  -1   -0.17    0.28
   6 -11  -1    0.01    0.48
   6 -11  -1    0.48    0.45
   6 -11  -1    0.10    0.44
   5 -11  -1   -0.59    0.54
   5 -11  -1    0.11    0.25
   5 -11  -1   -0.30    0.43
   5 -11  -1   -0.35    0.39
   5 -11  -1    0.29    0.44
   5 -11  -1   -0.35    0.45
   5 -11  -1    0.12    0.45
   4 -11  -1    3.51    0.45
   4 -11  -1    3.08    0.48
   4 -11  -1    3.36    0.58
   4 -11  -1    3.16    0.36
   4 -11  -1    3.94    0.54
   4 -11  -1    2.76    0.44
   3 -11  -1    2.96    0.33
   3 -11  -1    3.59    0.54
   3 -11  -1    3.30    0.40
   3 -11  -1    3.54    0.42
   3 -11  -1    3.81    0.54
   2 -11  -1    4.36    0.51
   2 -11  -1    5.65    0.67
   2 -11  -1    5.03    0.33
   2 -11  -1    5.26    0.61
   2 -11  -1    4.50    0.54
   1 -11  -1   22.35    0.86
   1 -11  -1   21.91    0.72
   1 -11  -1   21.36    0.59
   1 -11  -1   22.15    0.58
   1 -11  -1   22.79    0.77
   1 -11  -1   22.97    1.03
   1 -11  -1   21.71    0.65
  -1  11   1   21.71    0.98
  -1  11   1   21.19    0.60
  -1  11   1   21.64    0.55
   0 -11  -1    0.01    0.32
   0 -11  -1   -0.41    0.18
   0 -11  -1   -0.24    0.24
   0 -11  -1    0.02    0.39
   0 -11  -1   -0.17    0.26
   0 -11  -1   -0.15    0.21
   0  11   1    0.19    0.37
   0  11   1   -0.07    0.23
   0  11   1    0.04    0.22
  -1 -11  -1    6.09    0.48
  -1 -11  -1    7.57    0.80
  -1 -11  -1    7.48    0.58
  -1 -11  -1    6.04    0.48
  -1 -11  -1    6.92    0.43
  -1 -11  -1    7.18    0.46
   1  11   1    6.53    0.46
   1  11   1    6.64    0.45
   1  11   1    7.70    0.49
   1  11   1    5.99    0.68
  -2 -11  -1    0.42    0.25
  -2 -11  -1    0.13    0.30
  -2 -11  -1    1.02    0.32
  -2 -11  -1    0.63    0.30
  -2 -11  -1    1.33    0.46
  -2 -11  -1    0.26    0.28
   2  11   1    0.43    0.34
   2  11   1    0.50    0.27
   2  11   1    0.20    0.36
   2  11   1    0.50    0.27
   2  11   1    0.60    0.27
  -3 -11  -1    0.20    0.27
  -3 -11  -1    0.52    0.34
  -3 -11  -1    0.10    0.32
  -3 -11  -1    0.29    0.30
  -3 -11  -1    0.33    0.28
  -3 -11  -1    0.18    0.44
   3  11   1    0.25    0.28
   3  11   1    0.39    0.30
   3  11   1    0.10    0.36
   3  11   1    0.13    0.43
   3  11   1    0.69    0.39
   3  11   1    0.11    0.34
  -4 -11  -1   12.40    0.71
  -4 -11  -1   11.44    0.74
  -4 -11  -1   12.20    0.66
  -4 -11  -1   11.32    0.70
  -4 -11  -1   10.36    0.62
  -4 -11  -1   11.15    0.99
   4  11   1   11.24    0.71
   4  11   1   12.03    0.65
   4  11   1   11.43    0.80
   4  11   1   13.11    0.99
   4  11   1   12.55    0.71
   4  11   1   12.25    0.74
  -5 -11  -1   14.17    0.72
  -5 -11  -1   12.87    0.81
  -5 -11  -1   13.68    0.72
  -5 -11  -1   13.23    0.80
  -5 -11  -1   13.55    0.78
   5  11   1   13.65    0.88
   5  11   1   12.92    1.08
   5  11   1   13.73    0.77
   5  11   1   13.63    0.81
   5  11   1   12.66    0.71
  -6 -11  -1    0.83    0.50
  -6 -11  -1    0.62    0.37
  -6 -11  -1    0.04    0.41
  -6 -11  -1   -0.12    0.53
  -6 -11  -1   -0.21    0.38
  -6 -11  -1   -0.29    0.41
   6  11   1    0.31    0.46
   6  11   1   -0.67    0.46
   6  11   1   -0.33    0.59
   6  11   1    0.23    0.45
   6  11   1    0.43    0.41
  -7 -11  -1    7.10    0.82
  -7 -11  -1    5.05    0.59
  -7 -11  -1    5.98    0.62
  -7 -11  -1    6.59    0.61
  -7 -11  -1    5.27    0.77
  -7 -11  -1    5.61    0.69
   7  11   1    6.04    0.83
   7  11   1    5.67    0.58
   7  11   1    6.69    0.66
   7  11   1    5.21    0.64
   7  11   1    5.14    0.69
   7  11   1    5.11    0.58
  -8 -11  -1    0.52    0.52
  -8 -11  -1    0.61    0.54
  -8 -11  -1    1.40    0.67
  -8 -11  -1   -0.13    0.54
  -8 -11  -1    1.14    0.70
  -8 -11  -1    1.35    0.59
   8  11   1    0.49    0.70
   8  11   1    0.86    0.54
   8  11   1    0.37    0.59
   8  11   1    0.97    0.50
   8  11   1    0.17    0.57
   8  11   1    1.21    0.67
  -9 -11  -1    1.33    0.61
  -9 -11  -1    1.83    0.67
  -9 -11  -1    1.71    0.83
  -9 -11  -1    3.63    0.78
  -9 -11  -1    3.64    0.78
   9  11   1    2.09    0.80
   9  11   1    1.92    0.71
   9  11   1    2.88    0.74
   9  11   1    2.65    0.61
   9  11   1    1.54    0.57
 -10 -11  -1    0.15    1.08
 -10 -11  -1    0.83    0.70
 -10 -11  -1    3.25    0.78
 -10 -11  -1   -1.58    0.71
 -10 -11  -1    1.25    0.88
  10  11   1    0.89    0.63
  10  11   1    0.50    0.52
  10  11   1    0.20    0.87
 -11 -11  -1   -1.20    0.95
 -11 -11  -1   -0.37    0.71
 -11 -11  -1    1.91    0.92
  11  11   1   -0.61    0.82
  11  11   1   -0.14    0.67
   8 -12  -1   10.30    0.58
   8 -12  -1    9.77    0.82
   8 -12  -1   13.40    1.35
   8 -12  -1   11.31    1.07
   8 -12  -1   10.21    1.07
   7 -12  -1   16.85    1.20
   7 -12  -1   18.16    1.31
   7 -12  -1   16.81    0.63
   7 -12  -1   20.74    1.27
   7 -12  -1   17.14    1.11
   6 -12  -1    3.54    0.60
   6 -12  -1    2.72    0.68
   6 -12  -1    2.76    0.62
   6 -12  -1    3.27    0.61
   6 -12  -1    2.88    0.66
   5 -12  -1    2.20    0.53
   5 -12  -1    1.84    0.61
   5 -12  -1    1.18    0.58
   5 -12  -1    1.89    0.48
   5 -12  -1    0.85    0.53
   5 -12  -1    0.69    0.54
   5 -12  -1    1.70    0.28
   4 -12  -1    8.67    0.92
   4 -12  -1    8.85    0.73
   4 -12  -1    7.14    0.76
   4 -12  -1    8.65    0.43
   4 -12  -1    9.65    0.89
   3 -12  -1   32.05    0.98
   3 -12  -1   30.93    1.23
   3 -12  -1   31.94    0.72
   3 -12  -1   31.32    0.99
   3 -12  -1   31.73    1.22
   2 -12  -1   46.98    1.35
   2 -12  -1   47.05    0.95
   2 -12  -1   45.09    1.17
   2 -12  -1   47.54    1.16
   2 -12  -1   47.94    1.49
   1 -12  -1   28.26    1.02
   1 -12  -1   29.51    0.87
   1 -12  -1   30.02    0.72
   1 -12  -1   29.86    0.92
   1 -12  -1   29.29    0.72
   1 -12  -1   29.76    1.23
   1 -12  -1   26.42    0.92
   0 -12  -1   36.63    1.08
   0 -12  -1   35.64    0.96
   0 -12  -1   35.44    0.86
   0 -12  -1   36.84    0.94
   0 -12  -1   36.55    1.36
   0 -12  -1   36.01    0.88
   0  12   1   37.44    0.90
   0  12   1   36.27    0.84
   0  12   1   36.68    1.28
  -1 -12  -1    0.85    0.53
  -1 -12  -1    0.20    0.32
  -1 -12  -1    0.27    0.29
  -1 -12  -1    0.24    0.24
  -1 -12  -1    0.42    0.31
  -1 -12  -1    0.16    0.35
   1  12   1    0.18    0.40
   1  12   1    0.26    0.25
   1  12   1    0.73    0.27
   1  12   1    0.03    0.33
  -2 -12  -1   17.50    0.67
  -2 -12  -1   16.43    1.22
  -2 -12  -1   17.67    0.72
  -2 -12  -1   18.84    0.79
  -2 -12  -1   17.69    0.74
  -2 -12  -1   18.10    0.74
   2  12   1   17.51    0.68
   2  12   1   17.56    0.93
   2  12   1   18.80    0.84
   2  12   1   18.34    0.69
  -3 -12  -1    0.01    0.37
  -3 -12  -1   -0.34    0.35
  -3 -12  -1    0.07    0.35
  -3 -12  -1   -0.03    0.34
  -3 -12  -1   -0.73    0.33
  -3 -12  -1   -0.15    0.50
   3  12   1   -0.18    0.40
   3  12   1   -0.26    0.40
   3  12   1   -0.16    0.31
   3  12   1   -0.05    0.32
   3  12   1    0.10    0.33
  -4 -12  -1   -0.13    0.36
  -4 -12  -1    0.40    0.42
  -4 -12  -1    0.32    0.36
  -4 -12  -1   -0.04    0.50
  -4 -12  -1   -0.53    0.41
  -4 -12  -1   -0.03    0.39
   4  12   1    0.52    0.38
   4  12   1    0.24    0.35
   4  12   1    0.84    0.46
   4  12   1    0.00    0.39
   4  12   1    0.77    0.46
  -5 -12  -1    7.53    0.78
  -5 -12  -1    6.57    0.79
  -5 -12  -1    7.95    0.70
  -5 -12  -1    7.64    0.77
  -5 -12  -1    7.43    0.68
  -5 -12  -1    7.90    0.71
   5  12   1    5.97    0.93
   5  12   1    7.11    0.79
   5  12   1    7.18    0.71
   5  12   1    6.47    0.60
   5  12   1    6.84    0.68
  -6 -12  -1   -0.51    0.51
  -6 -12  -1    0.34    0.45
  -6 -12  -1    0.09    0.45
  -6 -12  -1    0.19    0.46
  -6 -12  -1    0.31    0.60
  -6 -12  -1    0.74    0.46
   6  12   1   -0.89    0.42
   6  12   1   -0.22    0.42
   6  12   1   -0.34    0.48
   6  12   1    1.47    0.57
  -7 -12  -1    0.60    0.48
  -7 -12  -1    0.19    0.62
  -7 -12  -1   -0.06    0.65
  -7 -12  -1   -0.27    0.80
  -7 -12  -1    0.82    0.67
  -7 -12  -1    0.73    0.53
   7  12   1    1.03    0.66
   7  12   1   -0.57    0.51
   7  12   1   -0.81    0.56
   7  12   1   -0.14    0.54
  -8 -12  -1   -0.34    0.56
  -8 -12  -1    0.09    0.73
  -8 -12  -1   -0.12    0.60
  -8 -12  -1   -0.07    0.59
   8  12   1    0.35    0.54
   8  12   1   -0.55    0.61
   8  12   1    1.49    0.65
   8  12   1   -0.59    0.56
   8  12   1   -1.32    0.74
  -9 -12  -1    0.92    0.69
  -9 -12  -1    0.14    0.86
  -9 -12  -1    0.64    0.64
  -9 -12  -1    1.28    0.76
   9  12   1   -0.70    0.72
   9  12   1   -0.12    0.66
   9  12   1    0.81    0.62
 -10 -12  -1    1.52    0.78
 -10 -12  -1    1.29    0.98
  10  12   1   -0.65    0.84
  10  12   1    1.50    0.67
   7 -13  -1    1.19    0.75
   7 -13  -1    0.88    0.69
   7 -13  -1   -0.31    0.67
   7 -13  -1    2.66    0.74
   6 -13  -1    0.61    0.68
   6 -13  -1    0.19    0.63
   6 -13  -1    0.20    0.63
   6 -13  -1    0.20    0.74
   6 -13  -1    0.12    0.57
   5 -13  -1    0.63    0.63
   5 -13  -1   -0.68    0.54
   5 -13  -1   -0.36    0.50
   5 -13  -1    1.00    0.68
   5 -13  -1    0.38    0.55
   4 -13  -1    1.14    0.61
   4 -13  -1    0.97    0.57
   4 -13  -1    0.12    0.51
   4 -13  -1    1.10    0.47
   3 -13  -1    2.22    0.59
   3 -13  -1    1.58    0.24
   3 -13  -1    1.72    0.63
   3 -13  -1    1.30    0.42
   3 -13  -1    1.59    0.56
   2 -13  -1   11.92    1.25
   2 -13  -1   11.32    0.79
   2 -13  -1   12.37    0.71
   2 -13  -1   12.34    0.49
   2 -13  -1   14.47    0.97
   1 -13  -1   56.97    1.22
   1 -13  -1   57.06    1.50
   1 -13  -1   56.55    1.31
   1 -13  -1   56.20    1.37
   1 -13  -1   51.34    2.19
   1 -13  -1   57.73    1.15
   0 -13  -1   -0.24    0.32
   0 -13  -1   -0.25    0.41
   0 -13  -1    0.07    0.54
   0 -13  -1   -0.07    0.25
   0 -13  -1   -0.05    0.30
   0  13   1   -0.12    0.26
   0  13   1    0.29    0.30
   0  13   1   -0.63    0.52
  -1 -13  -1    2.82    0.43
  -1 -13  -1    2.53    0.34
  -1 -13  -1    3.08    0.48
  -1 -13  -1    2.92    0.43
  -1 -13  -1    3.10    0.70
  -1 -13  -1    2.68    0.40
   1  13   1    2.85    0.40
   1  13   1    3.10    0.36
   1  13   1    2.25    0.93
  -2 -13  -1   16.91    0.79
  -2 -13  -1   15.81    0.78
  -2 -13  -1   17.66    0.71
  -2 -13  -1   16.87    0.82
  -2 -13  -1   17.33    0.87
  -2 -13  -1   18.01    1.24
   2  13   1   14.88    0.94
   2  13   1   17.48    0.78
   2  13   1   15.34    1.36
   2  13   1   15.93    0.73
   2  13   1   17.16    0.71
  -3 -13  -1    6.58    0.64
  -3 -13  -1    6.21    0.74
  -3 -13  -1    7.76    0.87
  -3 -13  -1    7.72    0.75
  -3 -13  -1    7.39    0.73
  -3 -13  -1    6.14    0.72
   3  13   1    6.82    0.65
   3  13   1    7.42    0.86
   3  13   1    5.86    0.67
   3  13   1    6.33    0.64
   3  13   1    6.82    0.68
  -4 -13  -1    9.92    0.76
  -4 -13  -1   11.09    0.86
  -4 -13  -1   10.13    0.79
  -4 -13  -1   11.79    1.21
  -4 -13  -1   10.54    0.86
  -4 -13  -1   11.33    0.85
   4  13   1    9.83    0.90
   4  13   1   11.80    0.98
   4  13   1   10.59    0.76
   4  13   1   10.40    0.81
   4  13   1    9.85    0.76
  -5 -13  -1   40.70    1.72
  -5 -13  -1   39.74    1.30
  -5 -13  -1   38.41    1.32
  -5 -13  -1   38.92    1.24
  -5 -13  -1   38.88    1.21
  -5 -13  -1   45.95    1.96
   5  13   1   38.86    1.36
   5  13   1   40.90    1.33
   5  13   1   39.15    1.20
   5  13   1   37.29    1.40
  -6 -13  -1   12.37    1.32
  -6 -13  -1   14.45    1.00
  -6 -13  -1   13.61    0.97
  -6 -13  -1   14.42    0.92
  -6 -13  -1   13.73    1.10
   6  13   1   12.55    1.19
   6  13   1   15.75    1.07
   6  13   1   15.12    1.05
   6  13   1   11.77    0.92
  -7 -13  -1    2.34    0.76
  -7 -13  -1    2.76    0.65
  -7 -13  -1    1.78    0.63
  -7 -13  -1    2.13    0.73
   7  13   1    2.44    0.65
   7  13   1    1.34    0.63
   7  13   1    3.63    0.72
   7  13   1    2.63    0.81
   7  13   1    1.79    0.55
  -8 -13  -1    4.37    0.96
  -8 -13  -1    3.07    0.78
  -8 -13  -1    2.49    0.69
  -8 -13  -1    4.99    0.82
   8  13   1    3.64    0.90
   8  13   1    3.50    0.75
   8  13   1    2.75    0.69
  -9 -13  -1    7.64    1.20
  -9 -13  -1    7.97    0.99
   9  13   1    7.54    0.98
   9  13   1    6.47    0.83
   6 -14  -1   -0.97    0.74
   6 -14  -1   -0.07    0.65
   6 -14  -1    1.47    0.85
   5 -14  -1    2.92    0.63
   5 -14  -1    1.09    0.74
   5 -14  -1    1.22    0.84
   5 -14  -1    2.54    0.63
   5 -14  -1    2.79    0.83
   4 -14  -1    1.26    0.60
   4 -14  -1    0.71    0.53
   4 -14  -1   -0.12    0.71
   4 -14  -1    1.74    0.71
   3 -14  -1   -0.09    0.50
   3 -14  -1    0.71    0.24
   3 -14  -1    0.66    0.45
   3 -14  -1    1.20    0.66
   2 -14  -1    1.01    0.27
   2 -14  -1    0.55    0.40
   2 -14  -1    0.98    0.63
   1 -14  -1    5.37    0.63
   1 -14  -1    4.70    0.78
   1 -14  -1    5.72    0.49
   1 -14  -1    5.29    0.81
   1 -14  -1    5.42    0.65
   0 -14  -1    0.56    0.42
   0 -14  -1    0.85    0.55
   0 -14  -1   -0.24    0.62
   0 -14  -1    1.05    0.39
   0 -14  -1    0.80    0.30
   0  14   1    0.69    0.32
   0  14   1    1.27    0.37
   0  14   1    1.81    0.70
  -1 -14  -1    0.42    0.66
  -1 -14  -1   -0.01    0.48
  -1 -14  -1    0.40    0.40
  -1 -14  -1    0.79    0.32
   1  14   1    0.63    0.35
   1  14   1    1.28    0.66
   1  14   1    0.30    0.39
  -2 -14  -1    5.35    0.60
  -2 -14  -1    4.01    0.85
  -2 -14  -1    4.39    0.45
  -2 -14  -1    5.12    0.56
  -2 -14  -1    5.46    0.58
   2  14   1    4.47    0.52
   2  14   1    3.50    0.44
   2  14   1    5.04    0.73
   2  14   1    5.17    0.46
   2  14   1    4.79    0.53
  -3 -14  -1   37.29    1.68
  -3 -14  -1   39.38    1.23
  -3 -14  -1   38.25    1.25
  -3 -14  -1   37.17    1.25
  -3 -14  -1   38.44    1.12
   3  14   1   37.63    1.17
   3  14   1   39.33    1.13
   3  14   1   41.51    1.37
   3  14   1   39.36    1.17
   3  14   1   38.31    1.50
  -4 -14  -1   16.34    0.92
  -4 -14  -1   17.93    1.04
  -4 -14  -1   14.08    1.40
  -4 -14  -1   12.71    0.92
  -4 -14  -1   16.92    0.99
   4  14   1   16.37    0.91
   4  14   1   16.61    1.17
   4  14   1   16.60    0.96
   4  14   1   16.90    1.16
   4  14   1   16.31    0.90
  -5 -14  -1   27.00    1.20
  -5 -14  -1   28.70    1.17
  -5 -14  -1   26.43    1.66
  -5 -14  -1   28.15    1.28
   5  14   1   26.98    1.35
   5  14   1   29.12    1.23
   5  14   1   26.20    1.13
   5  14   1   27.90    1.40
   5  14   1   27.98    1.15
  -6 -14  -1   44.37    1.47
  -6 -14  -1   45.57    1.61
  -6 -14  -1   42.06    1.90
  -6 -14  -1   39.95    1.78
   6  14   1   44.27    1.52
   6  14   1   43.21    1.43
   6  14   1   45.38    1.54
   6  14   1   44.84    1.59
   6  14   1   42.41    1.73
  -7 -14  -1   31.58    1.85
  -7 -14  -1   32.79    1.46
   7  14   1   32.79    1.79
   7  14   1   34.30    1.49
   7  14   1   35.95    1.52
  -8 -14  -1    8.73    0.97
  -8 -14  -1    6.58    1.10
   8  14   1    7.70    0.90
   8  14   1    7.97    0.96
   5 -15  -1   10.35    1.06
   5 -15  -1    9.23    1.15
   5 -15  -1    8.50    1.02
   5 -15  -1    8.16    1.13
   4 -15  -1   -0.89    0.74
   4 -15  -1    0.00    0.58
   4 -15  -1    1.17    0.97
   3 -15  -1    3.62    0.61
   3 -15  -1    2.82    0.83
   3 -15  -1    3.26    0.61
   2 -15  -1    2.92    0.34
   2 -15  -1    2.89    0.65
   2 -15  -1    2.17    0.79
   2 -15  -1    3.24    0.52
   1 -15  -1    0.85    0.60
   1 -15  -1    0.36    0.43
   1 -15  -1   -0.63    0.74
   1 -15  -1    0.72    0.32
   0 -15  -1    0.12    0.51
   0 -15  -1   -0.63    0.44
   0 -15  -1    0.86    0.35
   0 -15  -1    0.17    0.57
   0 -15  -1   -1.14    0.71
  -1 -15  -1    3.45    0.44
  -1 -15  -1    1.90    0.82
  -1 -15  -1    1.94    0.56
  -1 -15  -1    2.30    0.53
   1  15   1    3.64    0.48
   1  15   1    3.78    0.86
   1  15   1    3.46    0.45
  -2 -15  -1   10.98    0.90
  -2 -15  -1   13.79    1.46
  -2 -15  -1   11.13    0.79
   2  15   1   12.24    1.29
   2  15   1   11.12    0.79
   2  15   1   12.86    0.84
  -3 -15  -1   -0.02    0.45
  -3 -15  -1   -0.21    0.53
  -3 -15  -1   -0.60    0.59
  -3 -15  -1    3.35    0.90
   3  15   1    0.31    0.49
   3  15   1    0.02    0.47
   3  15   1    0.46    0.72
   3  15   1    0.27    0.51
  -4 -15  -1   16.57    1.09
  -4 -15  -1   17.63    1.00
  -4 -15  -1   15.54    1.16
  -4 -15  -1   15.35    1.52
   4  15   1   16.86    1.01
   4  15   1   18.47    1.37
   4  15   1   18.42    1.06
   4  15   1   18.32    1.31
   4  15   1   17.52    1.00
  -5 -15  -1   -1.16    0.79
  -5 -15  -1   -0.46    0.83
  -5 -15  -1   -0.32    0.61
   5  15   1    0.47    0.80
   5  15   1    0.13    0.78
   5  15   1   -0.52    0.56
   5  15   1    0.05    0.60
  -6 -15  -1    2.75    0.97
  -6 -15  -1    5.25    0.78
   6  15   1    4.03    0.73
   6  15   1    3.14    0.80
   6  15   1    3.28    0.98
  -7 -15  -1    1.33    0.77
  -7 -15  -1   -0.63    1.10
   7  15   1    0.24    0.75
   7  15   1    0.85    0.77
   3 -16  -1    7.77    1.14
   2 -16  -1    6.21    1.03
   2 -16  -1    6.52    0.65
   1 -16  -1    6.55    1.05
   1 -16  -1    7.51    0.67
   1 -16  -1    6.50    0.68
   0 -16  -1    1.17    0.89
   0 -16  -1    1.83    0.64
   0 -16  -1    1.60    0.46
  -1 -16  -1    0.76    0.66
  -1 -16  -1    1.79    0.48
  -1 -16  -1    0.53    0.86
  -1 -16  -1    2.16    0.68
  -1 -16  -1    2.34    0.64
   1  16   1    2.29    0.90
   1  16   1    1.64    0.50
   1  16   1    1.62    0.45
  -2 -16  -1    1.65    0.94
  -2 -16  -1    3.81    0.71
  -2 -16  -1    4.42    0.57
  -2 -16  -1    3.57    0.74
   2  16   1    3.84    0.59
   2  16   1    5.36    0.98
   2  16   1    4.46    0.56
  -3 -16  -1    2.33    0.95
  -3 -16  -1    3.46    0.68
  -3 -16  -1    3.10    0.70
   3  16   1    4.15    0.63
   3  16   1    4.58    0.62
   3  16   1    3.76    0.64
   3  16   1    4.19    0.95
  -4 -16  -1    4.58    0.77
  -4 -16  -1    2.26    1.03
   4  16   1    4.43    0.69
   4  16   1    4.71    0.91
  -5 -16  -1   -1.64    0.96
  -5 -16  -1    1.26    0.70
   5  16   1    0.06    0.84
   5  16   1   -1.16    0.62
   4  16  -2    5.41    0.74
   4  16  -2    7.12    1.05
  -4 -16   2    8.67    0.98
  -4 -16   2    6.37    1.26
   3  16  -2    0.13    0.91
   3  16  -2    1.38    0.59
   3  16  -2    2.09    0.58
  -3 -16   2    0.42    1.03
  -3 -16   2    1.15    0.78
   2  16  -2    3.70    0.97
   2  16  -2    2.56    0.54
   2  16  -2    3.98    0.65
  -2 -16   2    2.69    0.75
  -2 -16   2    2.93    1.10
  -2 -16   2    2.59    0.48
  -1 -16   2   -0.06    0.59
  -1 -16   2    0.62    0.46
  -1 -16   2    0.21    0.80
  -1 -16   2    1.71    0.99
   0 -16   2   -1.04    0.70
   0 -16   2    0.57    0.95
   1 -16   2    2.95    1.04
   1 -16   2    3.80    0.73
   2 -16   2    1.59    0.71
   2 -16   2    0.80    0.95
   6  15  -2    5.71    0.82
   6  15  -2    2.17    0.86
  -6 -15   2    2.69    0.86
  -6 -15   2    4.37    1.15
   5  15  -2   16.03    1.70
   5  15  -2   19.80    1.40
   5  15  -2   16.68    1.16
  -5 -15   2   16.79    1.83
  -5 -15   2   14.28    1.34
   4  15  -2    1.47    0.82
   4  15  -2    2.35    0.59
   4  15  -2    0.01    0.50
   4  15  -2    1.75    0.58
   4  15  -2   -0.59    0.92
  -4 -15   2    2.41    0.93
  -4 -15   2    1.96    0.53
  -4 -15   2    1.67    0.74
   3  15  -2    5.84    0.60
   3  15  -2    6.11    0.91
   3  15  -2    5.88    0.64
  -3 -15   2    6.06    0.63
  -3 -15   2    6.30    1.04
  -3 -15   2    6.47    0.78
   2  15  -2    8.67    0.99
   2  15  -2    7.77    0.77
   2  15  -2    8.81    0.82
  -2 -15   2    8.16    0.94
  -2 -15   2    7.92    1.08
  -2 -15   2   10.01    0.83
  -2 -15   2    8.53    0.97
   1  15  -2    2.57    0.83
   1  15  -2    2.57    0.41
  -1 -15   2    3.27    0.88
  -1 -15   2    2.48    0.45
  -1 -15   2    2.07    0.63
  -1 -15   2    1.89    0.54
   0 -15   2    2.82    0.41
   0 -15   2    2.93    0.78
   0 -15   2    2.30    0.62
   0 -15   2    2.89    0.90
   1 -15   2    3.42    0.64
   1 -15   2    3.12    0.79
   1 -15   2    4.11    0.38
   1 -15   2    2.81    0.90
   2 -15   2   -0.60    0.55
   2 -15   2    0.41    0.82
   2 -15   2   -0.39    0.76
   3 -15   2    4.17    0.72
   3 -15   2    3.83    0.93
   3 -15   2    4.76    0.84
   4 -15   2    0.02    0.83
   4 -15   2   -0.01    0.80
   4 -15   2    0.17    0.67
   8  14  -2    6.44    0.93
   8  14  -2    8.48    0.94
  -8 -14   2    7.76    0.99
  -8 -14   2    7.95    1.26
   7  14  -2    1.63    0.78
   7  14  -2    0.99    0.71
  -7 -14   2    1.14    0.78
  -7 -14   2    1.27    1.02
   6  14  -2    8.68    0.85
   6  14  -2    9.83    1.19
   6  14  -2    8.63    1.59
  -6 -14   2    8.90    0.93
  -6 -14   2    8.20    1.11
   5  14  -2    0.89    0.50
   5  14  -2    0.70    0.59
   5  14  -2    0.58    0.68
   5  14  -2    0.36    0.87
   5  14  -2    2.00    0.60
  -5 -14   2   -0.05    0.80
  -5 -14   2    0.71    0.60
  -5 -14   2    1.61    0.58
  -5 -14   2    0.52    0.60
  -5 -14   2   -0.33    0.63
   4  14  -2   29.29    1.07
   4  14  -2   28.32    1.55
   4  14  -2   28.85    1.13
   4  14  -2   29.18    1.15
   4  14  -2   29.94    1.38
  -4 -14   2   29.66    1.72
  -4 -14   2   27.27    1.12
  -4 -14   2   29.16    1.20
  -4 -14   2   25.17    1.51
  -4 -14   2   27.59    1.16
   3  14  -2   -0.46    0.70
   3  14  -2    0.67    0.67
   3  14  -2    0.08    0.42
   3  14  -2   -0.09    0.44
   3  14  -2    0.54    0.44
  -3 -14   2   -0.04    0.44
  -3 -14   2   -0.92    0.72
  -3 -14   2   -0.17    0.48
  -3 -14   2    0.41    0.51
  -3 -14   2   -0.38    0.52
   2  14  -2    0.44    0.63
   2  14  -2    0.23    0.38
   2  14  -2    0.04    0.41
  -2 -14   2   -0.32    0.36
  -2 -14   2   -0.47    0.47
  -2 -14   2    0.59    0.49
  -2 -14   2   -0.90    0.69
   1  14  -2    2.45    0.40
   1  14  -2    2.00    0.40
   1  14  -2    0.83    0.67
  -1 -14   2    0.31    0.71
  -1 -14   2    2.56    0.55
  -1 -14   2    1.49    0.52
  -1 -14   2    1.61    0.37
  -1 -14   2    2.48    0.46
   0 -14   2   11.71    0.89
   0 -14   2   13.20    0.63
   0 -14   2   13.58    0.97
   0 -14   2   14.61    1.36
   1 -14   2    0.69    0.27
   1 -14   2    0.09    0.48
   1 -14   2    0.28    0.71
   1 -14   2    0.24    0.54
   1 -14   2    0.99    0.60
   2 -14   2    9.62    1.09
   2 -14   2   10.92    1.30
   2 -14   2   11.18    0.92
   2 -14   2   12.21    1.03
   3 -14   2    0.56    0.54
   3 -14   2    0.39    0.65
   3 -14   2   -0.65    0.66
   3 -14   2    0.20    0.68
   4 -14   2    1.97    0.83
   4 -14   2    0.44    0.59
   4 -14   2    1.11    0.70
   4 -14   2   -0.12    0.70
   4 -14   2    0.08    0.71
   5 -14   2    5.12    0.87
   5 -14   2    5.19    0.75
   5 -14   2    4.68    0.91
   5 -14   2    5.38    1.02
   5 -14   2    3.58    0.78
   6 -14   2    5.27    0.90
   6 -14   2    3.20    1.09
   6 -14   2    4.95    1.05
   6 -14   2    4.02    0.84
   6 -14   2    4.37    0.91
   9  13  -2    0.83    0.93
   9  13  -2    1.48    0.74
  -9 -13   2    1.06    1.06
  -9 -13   2    1.69    0.89
   8  13  -2    1.70    0.77
   8  13  -2    3.72    0.78
  -8 -13   2    2.99    0.81
  -8 -13   2    0.91    1.00
   7  13  -2   26.69    1.32
   7  13  -2   23.81    1.33
  -7 -13   2   24.43    1.32
  -7 -13   2   28.73    1.77
  -7 -13   2   25.20    1.42
  -7 -13   2   26.12    1.45
   6  13  -2    1.44    0.62
   6  13  -2    1.79    0.54
   6  13  -2    0.73    0.81
   6  13  -2    1.66    0.63
   6  13  -2    1.69    0.68
  -6 -13   2    1.35    0.62
  -6 -13   2    1.70    0.58
  -6 -13   2    2.38    0.89
  -6 -13   2    2.05    0.68
  -6 -13   2    1.60    0.61
   5  13  -2    1.96    0.59
   5  13  -2    2.48    0.59
   5  13  -2    2.05    0.54
   5  13  -2    1.10    0.71
   5  13  -2    2.84    0.50
  -5 -13   2    3.02    0.58
  -5 -13   2    2.70    0.83
  -5 -13   2    3.01    0.56
  -5 -13   2    2.81    0.57
  -5 -13   2    1.18    0.62
   4  13  -2   21.43    1.25
   4  13  -2   19.04    0.95
   4  13  -2   18.59    0.94
   4  13  -2   20.54    0.88
   4  13  -2   19.85    1.09
  -4 -13   2   21.93    0.96
  -4 -13   2   19.72    0.97
  -4 -13   2   19.22    1.07
  -4 -13   2   22.39    1.47
  -4 -13   2   19.18    0.95
   3  13  -2    5.28    1.02
   3  13  -2    2.77    0.65
   3  13  -2    2.97    0.53
   3  13  -2    2.92    0.46
   3  13  -2    3.08    0.54
   3  13  -2    3.30    0.49
  -3 -13   2    3.07    0.44
  -3 -13   2    2.19    0.75
  -3 -13   2    3.00    0.57
  -3 -13   2    2.55    0.47
  -3 -13   2    3.78    0.52
   2  13  -2    1.76    0.61
   2  13  -2    2.23    0.42
   2  13  -2    2.83    0.42
   2  13  -2    2.52    0.34
  -2 -13   2    2.67    0.46
  -2 -13   2    3.22    0.52
  -2 -13   2    2.03    0.68
  -2 -13   2    2.27    0.38
  -2 -13   2    2.16    0.43
  -2 -13   2    1.84    0.43
   1  13  -2   22.60    0.77
   1  13  -2   21.24    0.75
   1  13  -2   23.83    1.14
  -1 -13   2   23.01    0.75
  -1 -13   2   24.02    0.97
  -1 -13   2   20.15    1.25
  -1 -13   2   20.53    0.81
  -1 -13   2   21.97    1.34
  -1 -13   2   24.02    0.93
   0  13  -2    5.22    0.68
   0 -13   2    4.91    0.56
   0 -13   2    4.38    0.39
   0 -13   2    4.77    0.54
   0 -13   2    5.36    0.47
   0 -13   2    5.14    0.73
   1 -13   2   15.40    1.17
   1 -13   2   12.41    0.83
   1 -13   2   12.32    0.86
   1 -13   2   14.42    0.94
   1 -13   2   13.91    0.52
   2 -13   2    1.75    0.53
   2 -13   2    1.86    0.49
   2 -13   2    1.06    0.61
   2 -13   2    0.39    0.62
   2 -13   2    2.11    0.57
   3 -13   2   23.36    1.12
   3 -13   2   23.85    1.38
   3 -13   2   22.31    1.29
   3 -13   2   22.40    1.18
   3 -13   2   24.50    1.08
   4 -13   2    1.21    0.61
   4 -13   2    0.47    0.60
   4 -13   2    0.60    0.66
   4 -13   2   -0.38    0.49
   4 -13   2    0.00    0.59
   5 -13   2    1.97    0.78
   5 -13   2    1.83    0.68
   5 -13   2    0.24    0.67
   5 -13   2    0.21    0.60
   5 -13   2    0.59    0.57
   6 -13   2   16.89    1.33
   6 -13   2   17.65    1.56
   6 -13   2   14.19    1.37
   6 -13   2   12.54    1.21
   6 -13   2   14.58    1.22
   7 -13   2    3.59    0.85
   7 -13   2    3.36    0.96
   7 -13   2    3.74    0.89
   7 -13   2    3.37    0.78
   7 -13   2    2.88    0.94
  10  12  -2   12.59    1.23
  10  12  -2    8.95    1.09
 -10 -12   2    8.49    1.04
 -10 -12   2   11.46    1.29
   9  12  -2    1.05    0.77
   9  12  -2    2.77    0.71
  -9 -12   2    1.54    0.96
  -9 -12   2    1.81    0.78
   8  12  -2   19.48    1.17
   8  12  -2   21.55    1.28
  -8 -12   2   20.64    1.34
  -8 -12   2   16.54    1.62
  -8 -12   2   15.98    1.27
   7  12  -2    2.51    0.63
   7  12  -2    1.82    0.55
   7  12  -2    0.69    0.79
   7  12  -2    1.84    0.53
   7  12  -2    1.58    0.61
  -7 -12   2    1.14    0.58
  -7 -12   2    0.46    0.54
  -7 -12   2    0.94    0.76
  -7 -12   2    1.18    0.61
  -7 -12   2    1.77    0.63
   6  12  -2    2.70    0.67
   6  12  -2    5.04    0.64
   6  12  -2    4.07    0.60
   6  12  -2    4.54    0.55
   6  12  -2    4.86    0.81
  -6 -12   2    7.01    0.82
  -6 -12   2    5.15    0.83
  -6 -12   2    6.55    0.68
  -6 -12   2    5.68    0.70
  -6 -12   2    4.04    0.61
   5  12  -2    0.00    0.43
   5  12  -2   -0.49    0.38
   5  12  -2   -0.19    0.49
   5  12  -2    0.00    0.62
   5  12  -2    0.40    0.44
   5  12  -2   -0.61    0.94
  -5 -12   2    0.06    0.41
  -5 -12   2    0.17    0.46
  -5 -12   2   -0.10    0.52
  -5 -12   2   -0.25    0.38
  -5 -12   2    0.21    0.50
  -5 -12   2    1.67    0.67
   4  12  -2    8.18    0.95
   4  12  -2    9.09    0.76
   4  12  -2    9.19    0.79
   4  12  -2    8.84    0.84
   4  12  -2    7.70    0.72
   4  12  -2    8.69    0.65
  -4 -12   2    7.14    0.85
  -4 -12   2    9.45    0.83
  -4 -12   2    8.39    0.68
  -4 -12   2    7.24    0.73
  -4 -12   2    7.74    0.82
  -4 -12   2    9.97    0.75
   3  12  -2    2.04    0.46
   3  12  -2    1.43    0.54
   3  12  -2    2.24    0.44
   3  12  -2    1.75    0.38
   3  12  -2    1.65    0.34
   3  12  -2    1.79    0.47
  -3 -12   2    2.20    0.39
  -3 -12   2    1.58    0.44
  -3 -12   2    1.35    0.45
  -3 -12   2    1.51    0.38
  -3 -12   2    1.06    0.57
  -3 -12   2    2.02    0.36
   2  12  -2    0.77    0.33
   2  12  -2    0.79    0.34
   2  12  -2    0.48    0.32
   2  12  -2    1.16    0.50
   2  12  -2    0.37    0.35
   2  12  -2    1.22    0.49
  -2 -12   2    0.30    0.34
  -2 -12   2    0.69    0.42
  -2 -12   2    0.77    0.30
  -2 -12   2    0.10    0.34
  -2 -12   2    0.41    0.36
  -2 -12   2    1.13    0.53
   1  12  -2    1.25    0.28
   1  12  -2    1.31    0.45
   1  12  -2    0.89    0.31
  -1 -12   2    1.19    0.34
  -1 -12   2    1.61    0.34
  -1 -12   2    1.20    0.41
  -1 -12   2    1.10    0.57
  -1 -12   2    2.19    0.39
  -1 -12   2    1.14    0.28
   0  12  -2   49.31    1.45
   0 -12   2   47.91    1.02
   0 -12   2   48.66    1.25
   0 -12   2   47.92    1.28
   0 -12   2   48.51    1.06
   0 -12   2   47.63    1.04
   1 -12   2   15.12    0.49
   1 -12   2   13.91    1.01
   1 -12   2   16.22    0.82
   1 -12   2   15.06    0.85
   1 -12   2   13.96    0.79
   2 -12   2   11.30    0.83
   2 -12   2   10.43    0.94
   2 -12   2   11.13    0.98
   2 -12   2   12.57    0.81
   2 -12   2   11.99    0.78
   3 -12   2   15.21    0.88
   3 -12   2   14.62    0.90
   3 -12   2   15.04    1.05
   3 -12   2   14.59    0.93
   3 -12   2   14.10    1.00
   4 -12   2   23.77    1.22
   4 -12   2   24.23    1.08
   4 -12   2   25.09    1.11
   4 -12   2   23.22    1.16
   4 -12   2   25.61    1.19
   5 -12   2    2.12    0.56
   5 -12   2    2.09    0.67
   5 -12   2    2.37    0.66
   5 -12   2    2.07    0.64
   5 -12   2    1.63    0.54
   5 -12   2    1.23    0.56
   6 -12   2   31.84    1.36
   6 -12   2   32.59    1.47
   6 -12   2   34.97    1.41
   6 -12   2   35.80    1.47
   6 -12   2   33.12    1.37
   7 -12   2    5.69    0.76
   7 -12   2    4.46    0.86
   7 -12   2    4.55    0.91
   7 -12   2    5.62    0.82
   7 -12   2    5.24    0.85
   8 -12   2   41.72    1.57
   8 -12   2   40.01    1.84
   8 -12   2   43.31    1.74
  10  11  -2    3.90    0.92
  10  11  -2    3.63    0.75
 -10 -11   2    4.23    0.93
 -10 -11   2    6.02    1.09
 -10 -11   2    4.43    0.78
   9  11  -2   10.67    0.91
   9  11  -2   10.49    1.03
   9  11  -2    9.26    0.92
  -9 -11   2   12.76    1.50
  -9 -11   2    9.89    0.93
  -9 -11   2   12.05    1.24
   8  11  -2   -0.82    0.50
   8  11  -2    0.77    0.63
   8  11  -2    0.31    0.51
   8  11  -2    0.21    0.59
   8  11  -2    0.96    0.82
  -8 -11   2    0.20    0.67
  -8 -11   2    0.84    0.78
  -8 -11   2   -0.18    0.54
  -8 -11   2    1.05    0.63
  -8 -11   2    0.64    0.59
   7  11  -2    3.34    0.73
   7  11  -2    2.72    0.68
   7  11  -2    1.58    0.57
   7  11  -2    2.22    0.50
   7  11  -2    2.94    0.65
  -7 -11   2    2.28    0.74
  -7 -11   2    1.42    0.67
  -7 -11   2    2.11    0.53
  -7 -11   2    2.97    0.68
  -7 -11   2    1.73    0.62
  -7 -11   2    2.57    0.53
   6  11  -2    5.97    0.73
   6  11  -2    6.77    0.80
   6  11  -2    6.77    0.67
   6  11  -2    6.19    0.66
   6  11  -2    6.46    0.76
  -6 -11   2    6.34    0.68
  -6 -11   2    6.65    0.71
  -6 -11   2    6.00    0.81
  -6 -11   2    5.95    0.60
  -6 -11   2    6.77    0.81
  -6 -11   2    6.45    0.69
   5  11  -2    1.65    0.44
   5  11  -2    1.73    0.40
   5  11  -2    2.01    0.57
   5  11  -2    0.95    0.43
   5  11  -2    1.87    0.42
   5  11  -2    1.44    0.53
  -5 -11   2    1.66    0.57
  -5 -11   2    1.22    0.41
  -5 -11   2    0.82    0.44
  -5 -11   2    1.06    0.51
  -5 -11   2    1.88    0.41
  -5 -11   2    1.23    0.46
   4  11  -2    4.99    0.69
   4  11  -2    4.87    0.53
   4  11  -2    4.37    0.60
   4  11  -2    5.42    0.63
   4  11  -2    4.23    0.50
   4  11  -2    4.98    0.51
  -4 -11   2    5.65    0.58
  -4 -11   2    4.49    0.47
  -4 -11   2    5.74    0.84
  -4 -11   2    5.26    0.54
  -4 -11   2    5.09    0.59
  -4 -11   2    4.88    0.59
   3  11  -2    7.40    0.63
   3  11  -2    7.54    0.51
   3  11  -2    8.66    0.59
   3  11  -2    7.68    0.59
   3  11  -2    6.60    0.80
   3  11  -2    6.70    0.69
  -3 -11   2    7.84    0.57
  -3 -11   2    8.41    0.58
  -3 -11   2    8.53    0.70
  -3 -11   2    8.06    0.59
  -3 -11   2    7.96    0.89
  -3 -11   2    8.26    0.64
   2  11  -2    1.15    0.43
   2  11  -2    1.46    0.26
   2  11  -2    1.13    0.32
   2  11  -2    1.16    0.32
   2  11  -2    0.83    0.30
   2  11  -2    0.80    0.42
  -2 -11   2    1.99    0.35
  -2 -11   2    0.97    0.27
  -2 -11   2    1.93    0.32
  -2 -11   2    1.32    0.52
  -2 -11   2    1.14    0.38
  -2 -11   2    0.84    0.31
   1  11  -2    1.07    0.27
   1  11  -2    1.39    0.27
   1  11  -2    1.71    0.45
  -1 -11   2    1.25    0.29
  -1 -11   2    1.18    0.37
  -1 -11   2    1.11    0.28
  -1 -11   2    1.06    0.32
  -1 -11   2    1.00    0.25
  -1 -11   2    0.98    0.47
   0  11  -2    1.75    0.25
   0  11  -2    1.49    0.24
   0  11  -2    0.83    0.44
   0 -11   2    1.61    0.23
   0 -11   2    1.39    0.27
   0 -11   2    1.65    0.27
   0 -11   2    0.93    0.34
   0 -11   2    0.67    0.44
   0 -11   2    1.77    0.35
   1 -11   2    3.49    0.31
   1 -11   2    3.79    0.45
   1 -11   2    3.68    0.55
   1 -11   2    3.29    0.43
   2 -11   2    0.60    0.35
   2 -11   2    0.61    0.43
   2 -11   2    0.14    0.40
   2 -11   2    0.47    0.41
   2 -11   2    0.11    0.36
   3 -11   2    9.08    0.73
   3 -11   2    8.18    0.74
   3 -11   2    9.16    0.82
   3 -11   2    8.68    0.77
   3 -11   2    7.96    0.81
   4 -11   2    1.08    0.49
   4 -11   2    0.69    0.43
   4 -11   2    1.13    0.45
   4 -11   2    0.91    0.45
   4 -11   2    0.83    0.49
   5 -11   2   22.81    1.03
   5 -11   2   22.10    1.04
   5 -11   2   23.25    1.11
   5 -11   2   22.52    1.09
   5 -11   2   23.87    1.17
   5 -11   2   24.01    1.08
   6 -11   2   18.04    1.10
   6 -11   2   17.65    1.22
   6 -11   2   18.54    1.05
   6 -11   2   19.30    1.12
   6 -11   2   19.09    1.03
   6 -11   2   19.76    1.07
   7 -11   2   67.42    1.89
   7 -11   2   66.05    1.83
   7 -11   2   69.97    1.95
   7 -11   2   69.94    1.79
   8 -11   2   36.06    1.47
   8 -11   2   36.27    1.53
   8 -11   2   37.37    1.35
   8 -11   2   37.32    1.64
   9 -11   2   11.25    1.34
   9 -11   2   12.96    1.06
   9 -11   2   10.39    1.03
  11  10  -2   13.85    1.11
  11  10  -2   10.72    1.18
 -11 -10   2   11.81    1.09
 -11 -10   2   11.28    1.24
 -11 -10   2   15.91    1.59
  10  10  -2   50.08    1.53
  10  10  -2   49.07    1.80
  10  10  -2   49.97    1.51
 -10 -10   2   49.01    1.74
 -10 -10   2   51.06    2.03
 -10 -10   2   45.62    1.95
 -10 -10   2   48.27    1.85
   9  10  -2    1.04    0.52
   9  10  -2    1.70    0.80
   9  10  -2    3.56    0.84
   9  10  -2    1.29    0.52
   9  10  -2    1.55    0.68
  -9 -10   2    1.26    0.58
  -9 -10   2    0.93    0.77
  -9 -10   2    0.69    0.57
  -9 -10   2    1.41    0.71
  -9 -10   2    0.65    0.75
   8  10  -2   17.17    1.09
   8  10  -2   17.03    1.33
   8  10  -2   16.27    0.89
   8  10  -2   13.48    0.93
   8  10  -2   14.76    1.08
   8  10  -2   13.78    1.24
  -8 -10   2   16.11    1.10
  -8 -10   2   15.79    1.27
  -8 -10   2   16.33    1.00
  -8 -10   2   16.60    1.21
  -8 -10   2   16.77    1.03
   7  10  -2   17.12    0.87
   7  10  -2   16.96    1.10
   7  10  -2   17.22    1.02
   7  10  -2   14.70    1.10
   7  10  -2   16.86    0.83
   7  10  -2   17.08    1.16
  -7 -10   2   15.32    1.19
  -7 -10   2   17.60    0.95
  -7 -10   2   17.48    0.93
  -7 -10   2   11.85    1.35
  -7 -10   2   16.15    1.10
  -7 -10   2   15.75    0.86
   6  10  -2    8.13    0.78
   6  10  -2    7.37    0.90
   6  10  -2    7.24    0.92
   6  10  -2    7.20    0.75
   6  10  -2    8.01    0.66
  -6 -10   2    7.04    0.64
  -6 -10   2    6.08    1.14
  -6 -10   2    7.51    0.66
  -6 -10   2    7.16    0.73
  -6 -10   2    8.45    0.75
  -6 -10   2    8.02    0.82
   5  10  -2    2.22    0.46
   5  10  -2    2.46    0.39
   5  10  -2    2.12    0.45
   5  10  -2    2.57    0.54
   5  10  -2    2.02    0.37
  -5 -10   2    3.16    0.42
  -5 -10   2    2.72    0.42
  -5 -10   2    3.09    0.59
  -5 -10   2    2.48    0.38
  -5 -10   2    2.55    0.48
  -5 -10   2    2.72    0.51
   4  10  -2  167.99    3.05
   4  10  -2  163.71    3.02
   4  10  -2  168.12    2.91
   4  10  -2  166.32    3.18
   4  10  -2  168.92    3.01
   4  10  -2  159.45    3.05
  -4 -10   2  169.25    3.14
  -4 -10   2  170.55    2.95
  -4 -10   2  169.10    3.05
  -4 -10   2  167.09    3.35
  -4 -10   2  167.35    2.99
  -4 -10   2  166.03    2.98
   3  10  -2   27.02    0.86
   3  10  -2   27.11    1.00
   3  10  -2   27.27    0.82
   3  10  -2   26.64    0.75
   3  10  -2   27.41    0.90
   3  10  -2   25.85    0.84
  -3 -10   2   27.31    0.79
  -3 -10   2   26.84    0.80
  -3 -10   2   25.58    1.11
  -3 -10   2   27.00    0.82
  -3 -10   2   26.62    0.84
  -3 -10   2   26.27    0.91
   2  10  -2   29.46    1.00
   2  10  -2   29.58    0.73
   2  10  -2   30.57    0.81
   2  10  -2   29.04    0.80
   2  10  -2   28.81    0.81
   2  10  -2   29.15    0.94
  -2 -10   2   28.90    0.78
  -2 -10   2   30.48    0.78
  -2 -10   2   30.20    0.82
  -2 -10   2   29.03    1.12
  -2 -10   2   28.83    0.82
  -2 -10   2   30.97    0.93
   1  10  -2    1.77    0.22
   1  10  -2    2.07    0.28
   1  10  -2    1.77    0.26
   1  10  -2    1.89    0.25
   1  10  -2    1.64    0.39
  -1 -10   2    2.18    0.25
  -1 -10   2    2.21    0.35
  -1 -10   2    2.17    0.28
  -1 -10   2    1.81    0.31
  -1 -10   2    2.22    0.27
  -1 -10   2    1.84    0.43
   0  10  -2    2.33    0.23
   0  10  -2    2.68    0.44
   0  10  -2    1.98    0.23
   0 -10   2    1.90    0.34
   0 -10   2    2.29    0.33
   0 -10   2    2.03    0.22
   0 -10   2    2.56    0.47
   0 -10   2    1.92    0.25
   0 -10   2    2.00    0.24
   1 -10   2   -0.16    0.30
   1 -10   2    0.19    0.16
   1 -10   2   -0.08    0.34
   1 -10   2    0.08    0.28
   2 -10   2    0.07    0.32
   2 -10   2    0.18    0.33
   2 -10   2    0.51    0.31
   2 -10   2    0.56    0.39
   3 -10   2    3.38    0.49
   3 -10   2    3.33    0.44
   3 -10   2    2.79    0.48
   3 -10   2    2.87    0.46
   3 -10   2    2.58    0.45
   4 -10   2    8.18    0.73
   4 -10   2    7.84    0.75
   4 -10   2    7.36    0.71
   4 -10   2    7.55    0.70
   4 -10   2    6.50    0.75
   5 -10   2    0.21    0.42
   5 -10   2    0.71    0.42
   5 -10   2    0.06    0.48
   5 -10   2    0.36    0.39
   5 -10   2    0.70    0.43
   5 -10   2    0.16    0.41
   6 -10   2    8.06    0.86
   6 -10   2    6.16    0.75
   6 -10   2    7.44    0.76
   6 -10   2    6.41    0.63
   6 -10   2    6.66    0.83
   7 -10   2   -0.35    0.51
   7 -10   2   -0.10    0.54
   7 -10   2   -0.06    0.53
   7 -10   2    0.46    0.45
   7 -10   2   -0.20    0.64
   8 -10   2   58.03    1.53
   8 -10   2   57.35    1.62
   8 -10   2   60.66    1.78
   8 -10   2   56.26    1.79
   9 -10   2   -0.21    0.78
   9 -10   2   -0.77    0.54
   9 -10   2    0.06    0.43
   9 -10   2    0.69    0.28
   9 -10   2    0.11    0.60
   9 -10   2   -0.40    0.52
  10 -10   2    1.96    0.58
  10 -10   2    1.26    0.34
  10 -10   2    0.79    0.71
  11   9  -2   13.23    1.04
  11   9  -2   13.77    1.44
  11   9  -2   11.54    1.08
 -11  -9   2   13.72    1.54
 -11  -9   2    9.54    1.26
 -11  -9   2   12.43    1.32
 -11  -9   2   14.55    1.49
  10   9  -2    9.14    0.95
  10   9  -2    7.30    0.86
  10   9  -2    9.46    0.91
  10   9  -2    7.77    1.19
  10   9  -2    8.07    0.94
 -10  -9   2    7.41    0.98
 -10  -9   2    6.93    0.86
 -10  -9   2    9.05    1.09
 -10  -9   2    7.18    1.00
   9   9  -2    1.32    0.77
   9   9  -2    0.33    1.17
   9   9  -2    0.50    0.72
   9   9  -2    0.67    0.65
   9   9  -2    0.65    0.44
   9   9  -2   -0.16    0.42
  -9  -9   2    0.43    0.60
  -9  -9   2    1.42    0.60
  -9  -9   2    0.91    0.67
  -9  -9   2    1.41    0.69
  -9  -9   2    0.89    0.54
   8   9  -2   -0.31    0.57
   8   9  -2   -0.30    0.48
   8   9  -2   -0.33    0.41
   8   9  -2    0.00    0.51
   8   9  -2   -0.40    0.63
   8   9  -2    0.16    0.62
  -8  -9   2   -0.32    0.54
  -8  -9   2    0.42    0.59
  -8  -9   2    0.11    0.44
  -8  -9   2   -0.25    0.44
  -8  -9   2    0.31    0.54
   7   9  -2   39.81    1.10
   7   9  -2   37.37    1.21
   7   9  -2   40.81    1.25
   7   9  -2   38.62    1.38
   7   9  -2   36.75    1.25
   7   9  -2   36.74    1.35
  -7  -9   2   40.67    1.22
  -7  -9   2   38.39    1.18
  -7  -9   2   39.91    1.14
  -7  -9   2   37.94    1.34
  -7  -9   2   38.71    1.31
  -7  -9   2   39.08    1.45
   6   9  -2   28.17    1.13
   6   9  -2   26.00    0.99
   6   9  -2   26.55    1.01
   6   9  -2   28.36    0.89
   6   9  -2   27.23    1.10
  -6  -9   2   26.77    0.95
  -6  -9   2   26.91    1.08
  -6  -9   2   27.79    1.08
  -6  -9   2   28.00    1.21
  -6  -9   2   28.60    0.98
  -6  -9   2   28.05    0.89
   5   9  -2   50.45    1.41
   5   9  -2   50.08    1.17
   5   9  -2   48.80    1.35
   5   9  -2   49.95    1.20
   5   9  -2   48.04    1.35
   5   9  -2   49.55    1.26
  -5  -9   2   51.82    1.33
  -5  -9   2   52.67    1.18
  -5  -9   2   48.51    1.47
  -5  -9   2   49.65    1.37
  -5  -9   2   49.30    1.22
  -5  -9   2   51.70    1.23
   4   9  -2   56.31    1.28
   4   9  -2   54.43    1.30
   4   9  -2   56.07    1.20
   4   9  -2   56.79    1.43
   4   9  -2   56.30    1.36
   4   9  -2   56.97    1.29
  -4  -9   2   56.45    1.39
  -4  -9   2   55.25    1.26
  -4  -9   2   56.69    1.32
  -4  -9   2   56.24    1.25
  -4  -9   2   55.79    1.53
  -4  -9   2   57.14    1.22
   3   9  -2  194.03    3.76
   3   9  -2  219.46    3.80
   3   9  -2  216.30    3.63
   3   9  -2  214.79    3.68
   3   9  -2  210.02    3.66
   3   9  -2  213.35    3.54
  -3  -9   2  215.90    3.61
  -3  -9   2  214.40    3.74
  -3  -9   2  214.80    3.58
  -3  -9   2  215.58    3.60
  -3  -9   2  208.24    3.93
  -3  -9   2  216.67    3.66
   2   9  -2   34.00    0.94
   2   9  -2   34.02    0.85
   2   9  -2   33.87    0.84
   2   9  -2   34.18    0.77
   2   9  -2   36.36    1.03
   2   9  -2   34.30    0.85
  -2  -9   2   29.64    1.12
  -2  -9   2   34.10    0.86
  -2  -9   2   34.04    0.82
  -2  -9   2   34.61    0.94
  -2  -9   2   33.76    1.12
  -2  -9   2   34.26    0.82
   1   9  -2   67.30    1.28
   1   9  -2   68.16    1.21
   1   9  -2   66.56    1.46
   1   9  -2   68.21    1.29
   1   9  -2   66.75    1.48
   1   9  -2   68.22    1.26
  -1  -9   2   67.13    1.43
  -1  -9   2   68.30    1.30
  -1  -9   2   61.52    1.53
  -1  -9   2   66.12    1.62
  -1  -9   2   67.79    1.26
  -1  -9   2   67.20    1.27
   0   9  -2    0.45    0.17
   0   9  -2    0.46    0.31
   0   9  -2    0.49    0.18
   0  -9   2    0.27    0.33
   0  -9   2    0.50    0.18
   0  -9   2    0.70    0.17
   0  -9   2    0.66    0.19
   0  -9   2    0.80    0.28
   1  -9   2  120.66    2.28
   1  -9   2  122.72    2.00
   1  -9   2  121.04    2.26
   1  -9   2  122.16    2.43
   2  -9   2    5.98    0.56
   2  -9   2    6.17    0.54
   2  -9   2    6.08    0.53
   2  -9   2    6.32    0.60
   3  -9   2   24.62    0.87
   3  -9   2   22.41    0.83
   3  -9   2   22.98    0.82
   3  -9   2   24.54    0.89
   3  -9   2   23.50    0.86
   4  -9   2    0.48    0.31
   4  -9   2    0.07    0.33
   4  -9   2    0.54    0.37
   4  -9   2    0.05    0.37
   4  -9   2    0.51    0.33
   4  -9   2    0.40    0.36
   5  -9   2   98.53    2.02
   5  -9   2   96.21    2.14
   5  -9   2   99.59    2.06
   5  -9   2   97.16    2.05
   5  -9   2   97.36    2.12
   6  -9   2    0.30    0.45
   6  -9   2    0.81    0.45
   6  -9   2    0.78    0.41
   6  -9   2    0.25    0.35
   7  -9   2    0.85    0.29
   7  -9   2    0.25    0.59
   7  -9   2    0.10    0.43
   7  -9   2    0.74    0.50
   7  -9   2    0.14    0.44
   7  -9   2    0.50    0.19
   7  -9   2    0.25    0.38
   8  -9   2    3.63    0.65
   8  -9   2    3.05    0.59
   8  -9   2    3.25    0.54
   8  -9   2    3.11    0.40
   8  -9   2    1.95    0.71
   8  -9   2    2.34    0.46
   8  -9   2    3.34    0.39
   9  -9   2    8.47    0.95
   9  -9   2    7.37    0.75
   9  -9   2    7.67    0.84
   9  -9   2    7.39    0.87
   9  -9   2    7.08    0.52
   9  -9   2    7.34    0.75
  10  -9   2   17.69    0.70
  10  -9   2   16.71    1.22
  10  -9   2   15.40    1.00
  11  -9   2    1.45    0.62
  11  -9   2    1.06    0.74
  11  -9   2    1.59    0.41
  12   8  -2    4.25    0.73
  12   8  -2    3.86    0.76
  12   8  -2    4.33    1.02
 -12  -8   2    3.20    1.12
 -12  -8   2    5.05    1.04
 -12  -8   2    4.89    0.92
 -12  -8   2    3.35    0.91
  11   8  -2    3.93    0.98
  11   8  -2    4.22    0.64
  11   8  -2    5.74    0.99
  11   8  -2    4.14    0.64
  11   8  -2    4.99    1.22
 -11  -8   2    4.35    1.02
 -11  -8   2    5.97    0.91
 -11  -8   2    5.14    0.85
 -11  -8   2    4.61    0.78
  10   8  -2    1.67    0.53
  10   8  -2    1.80    0.55
  10   8  -2    3.25    0.90
  10   8  -2   -0.30    0.62
 -10  -8   2    0.45    0.69
 -10  -8   2    1.06    0.60
 -10  -8   2    0.76    0.64
 -10  -8   2    2.04    0.83
 -10  -8   2    2.26    0.60
   9   8  -2    1.23    0.65
   9   8  -2    0.14    0.62
   9   8  -2    0.35    0.44
   9   8  -2    1.05    0.58
   9   8  -2    1.06    0.40
   9   8  -2    0.52    0.55
  -9  -8   2    0.01    0.59
  -9  -8   2    0.08    0.51
  -9  -8   2    1.38    0.55
  -9  -8   2    0.92    0.57
  -9  -8   2    1.11    0.55
   8   8  -2    0.40    0.56
   8   8  -2    1.31    0.53
   8   8  -2    0.77    0.52
   8   8  -2    1.55    0.42
   8   8  -2    1.03    0.35
   8   8  -2    0.77    0.51
  -8  -8   2    1.33    0.53
  -8  -8   2    1.43    0.53
  -8  -8   2    1.26    0.45
  -8  -8   2    1.86    0.48
  -8  -8   2    0.33    0.61
   7   8  -2    7.97    0.78
   7   8  -2    8.72    0.84
   7   8  -2    8.58    0.65
   7   8  -2    7.77    0.57
   7   8  -2    8.02    0.74
  -7  -8   2    9.24    0.73
  -7  -8   2    9.12    0.89
  -7  -8   2    8.98    0.80
  -7  -8   2    9.30    0.67
  -7  -8   2    8.47    0.71
  -7  -8   2    8.17    0.84
   6   8  -2   16.50    0.69
   6   8  -2   16.10    0.80
   6   8  -2   15.55    0.87
   6   8  -2   15.97    0.66
   6   8  -2   15.91    0.81
  -6  -8   2   17.16    0.70
  -6  -8   2   15.28    0.84
  -6  -8   2   16.59    0.84
  -6  -8   2   16.88    0.94
  -6  -8   2   15.97    0.74
  -6  -8   2   16.85    0.78
   5   8  -2    2.14    0.37
   5   8  -2    2.35    0.44
   5   8  -2    2.30    0.37
   5   8  -2    2.16    0.33
  -5  -8   2    3.00    0.47
  -5  -8   2    2.67    0.39
  -5  -8   2    2.18    0.35
  -5  -8   2    2.31    0.32
  -5  -8   2    2.15    0.41
  -5  -8   2    2.28    0.35
   4   8  -2   58.50    1.26
   4   8  -2   60.75    1.44
   4   8  -2   60.68    1.32
   4   8  -2   59.12    1.22
  -4  -8   2   59.18    1.39
  -4  -8   2   59.14    1.28
  -4  -8   2   57.41    1.51
  -4  -8   2   60.89    1.34
  -4  -8   2   59.26    1.27
   3   8  -2   13.01    0.66
   3   8  -2   13.79    0.56
   3   8  -2   13.54    0.57
   3   8  -2   12.97    0.60
   3   8  -2   13.14    0.55
   3   8  -2   13.80    0.49
  -3  -8   2   15.08    0.52
  -3  -8   2   13.90    0.57
  -3  -8   2   13.84    0.62
  -3  -8   2   13.56    0.53
  -3  -8   2   13.05    0.52
  -3  -8   2   14.50    0.75
   2   8  -2    6.81    0.43
   2   8  -2    7.20    0.45
   2   8  -2    7.03    0.41
   2   8  -2    6.32    0.43
   2   8  -2    6.29    0.52
   2   8  -2    7.06    0.35
  -2  -8   2    6.35    0.41
  -2  -8   2    7.49    0.48
  -2  -8   2    7.14    0.60
  -2  -8   2    6.88    0.40
  -2  -8   2    6.92    0.39
  -2  -8   2    7.28    0.39
   1   8  -2    3.72    0.45
   1   8  -2    2.99    0.31
   1   8  -2    3.87    0.31
   1   8  -2    3.90    0.42
   1   8  -2    3.34    0.26
   1   8  -2    3.38    0.32
  -1  -8   2    3.68    0.34
  -1  -8   2    3.27    0.38
  -1  -8   2    3.31    0.28
  -1  -8   2    3.70    0.32
  -1  -8   2    3.36    0.30
  -1  -8   2    2.81    0.38
   0   8  -2   47.17    1.13
   0   8  -2   48.66    0.92
   0   8  -2   49.72    0.92
   0  -8   2   47.58    1.22
   0  -8   2   48.37    0.92
   0  -8   2   48.77    1.05
   0  -8   2   48.62    1.11
   0  -8   2   49.75    0.92
   0  -8   2   49.35    0.94
  -1   8  -2    0.13    0.26
   1  -8   2    0.50    0.24
   1  -8   2   -0.11    0.26
   1  -8   2    0.55    0.24
   1  -8   2    0.26    0.11
   2  -8   2   84.84    1.71
   2  -8   2   85.84    1.70
   2  -8   2   85.52    1.78
   2  -8   2   85.24    1.72
   3  -8   2    0.35    0.28
   3  -8   2    0.44    0.30
   3  -8   2    0.95    0.29
   3  -8   2    0.17    0.27
   3  -8   2    0.55    0.29
   4  -8   2  119.52    2.36
   4  -8   2  118.63    2.30
   4  -8   2  120.93    2.31
   4  -8   2  118.43    2.30
   4  -8   2  121.92    2.37
   5  -8   2    0.96    0.38
   5  -8   2    0.95    0.36
   5  -8   2    1.82    0.38
   5  -8   2    0.98    0.32
   5  -8   2    1.41    0.44
   6  -8   2   20.07    0.58
   6  -8   2   18.76    0.76
   6  -8   2   20.56    0.90
   6  -8   2   18.30    0.97
   6  -8   2   18.68    0.90
   6  -8   2   20.71    0.81
   7  -8   2    2.36    0.51
   7  -8   2    1.92    0.36
   7  -8   2    1.90    0.42
   7  -8   2    1.49    0.29
   7  -8   2    1.57    0.46
   7  -8   2    2.69    0.60
   8  -8   2   30.79    1.19
   8  -8   2   31.43    1.01
   8  -8   2   30.62    0.94
   8  -8   2   30.85    0.76
   8  -8   2   31.04    0.91
   8  -8   2   31.04    1.24
  -9   8  -2    0.53    0.57
   9  -8   2    0.01    0.30
   9  -8   2    0.50    0.39
   9  -8   2    0.42    0.55
   9  -8   2    0.34    0.27
   9  -8   2    0.07    0.36
   9  -8   2    0.59    0.44
   9  -8   2    0.75    0.67
 -10   8  -2    1.39    0.72
  10  -8   2    1.13    0.42
  10  -8   2    0.99    0.65
  10  -8   2    0.80    0.33
  10  -8   2    3.26    0.73
  10  -8   2    2.17    0.52
 -11   8  -2    1.06    0.77
  11  -8   2    0.01    0.68
  11  -8   2    1.12    0.64
  11  -8   2   -0.05    0.45
  11  -8   2    0.30    0.36
  12   7  -2    5.54    1.26
  12   7  -2    4.03    0.67
  12   7  -2    4.29    0.95
  12   7  -2    8.73    1.20
  12   7  -2    4.57    0.72
 -12  -7   2    4.72    1.13
 -12  -7   2    4.40    0.84
 -12  -7   2    3.40    0.95
 -12  -7   2    3.09    0.83
  11   7  -2   11.03    1.30
  11   7  -2   11.90    1.04
  11   7  -2   12.61    1.28
  11   7  -2   13.19    1.56
  11   7  -2   11.49    0.93
 -11  -7   2   11.98    1.09
 -11  -7   2   11.20    1.12
 -11  -7   2   12.55    1.33
 -11  -7   2   11.99    1.17
  10   7  -2    5.68    0.59
  10   7  -2    4.39    0.88
  10   7  -2    5.32    0.59
  10   7  -2    3.94    0.95
  10   7  -2    4.13    0.71
 -10  -7   2    4.47    0.66
 -10  -7   2    4.77    0.71
 -10  -7   2    4.21    0.71
 -10  -7   2    4.85    0.71
 -10  -7   2    3.85    0.70
   9   7  -2    3.74    0.68
   9   7  -2    4.59    0.50
   9   7  -2    4.77    0.64
   9   7  -2    5.45    0.77
   9   7  -2    5.37    0.67
  -9  -7   2    4.66    0.60
  -9  -7   2    5.20    0.56
  -9  -7   2    6.64    0.75
  -9  -7   2    3.73    0.62
  -9  -7   2    3.56    0.57
   8   7  -2   27.63    1.15
   8   7  -2   28.20    0.95
   8   7  -2   27.05    1.09
   8   7  -2   28.65    1.10
   8   7  -2   26.68    0.86
  -8  -7   2   26.46    1.10
  -8  -7   2   27.21    1.00
  -8  -7   2   25.97    1.00
  -8  -7   2   25.57    1.12
  -8  -7   2   27.37    1.16
   7   7  -2   45.28    1.14
   7   7  -2   45.32    1.26
   7   7  -2   44.19    1.32
   7   7  -2   43.23    1.23
   7   7  -2   42.59    1.06
  -7  -7   2   42.03    1.30
  -7  -7   2   45.09    1.16
  -7  -7   2   44.21    1.35
  -7  -7   2   43.10    1.20
  -7  -7   2   44.45    1.30
  -7  -7   2   42.03    1.17
   6   7  -2    2.77    0.44
   6   7  -2    2.26    0.42
   6   7  -2    2.39    0.39
   6   7  -2    2.69    0.32
   6   7  -2    2.35    0.39
  -6  -7   2    2.31    0.42
  -6  -7   2    2.74    0.43
  -6  -7   2    2.88    0.37
  -6  -7   2    2.63    0.38
  -6  -7   2    2.43    0.36
   5   7  -2    2.90    0.30
   5   7  -2    3.00    0.37
   5   7  -2    3.31    0.31
   5   7  -2    3.49    0.44
   5   7  -2    3.61    0.40
  -5  -7   2    3.57    0.39
  -5  -7   2    3.52    0.42
  -5  -7   2    3.65    0.46
  -5  -7   2    2.95    0.40
  -5  -7   2    3.24    0.34
  -5  -7   2    3.20    0.40
   4   7  -2    5.89    0.48
   4   7  -2    6.33    0.64
   4   7  -2    6.71    0.41
   4   7  -2    7.47    0.48
  -4  -7   2    7.32    0.50
  -4  -7   2    7.43    0.41
  -4  -7   2    7.36    0.60
  -4  -7   2    7.14    0.45
  -4  -7   2    6.48    0.43
  -4  -7   2    6.81    0.52
   3   7  -2    6.80    0.40
   3   7  -2    6.68    0.36
   3   7  -2    6.40    0.49
   3   7  -2    7.18    0.43
  -3  -7   2    6.47    0.39
  -3  -7   2    7.67    0.47
  -3  -7   2    6.77    0.38
  -3  -7   2    7.12    0.37
  -3  -7   2    7.49    0.57
   2   7  -2   17.09    0.55
   2   7  -2   16.95    0.53
   2   7  -2   16.79    0.55
   2   7  -2   17.28    0.62
   2   7  -2   16.79    0.47
   2   7  -2   17.01    0.55
  -2  -7   2   17.62    0.70
  -2  -7   2   18.24    0.51
  -2  -7   2   17.47    0.60
  -2  -7   2   17.14    0.51
  -2  -7   2   17.52    0.54
  -2  -7   2   16.58    0.50
   1   7  -2    1.67    0.20
   1   7  -2    1.14    0.23
   1   7  -2    1.55    0.16
   1   7  -2    1.63    0.26
   1   7  -2    1.42    0.19
   1   7  -2    1.53    0.20
  -1  -7   2    1.77    0.26
  -1  -7   2    1.73    0.19
  -1  -7   2    1.60    0.18
  -1  -7   2    1.47    0.29
  -1  -7   2    1.48    0.20
  -1  -7   2    1.28    0.19
   0   7  -2   27.44    0.59
   0   7  -2   27.97    0.59
   0   7  -2   28.30    0.77
   0  -7   2   27.95    0.75
   0  -7   2   28.05    0.59
   0  -7   2   28.77    0.70
   0  -7   2   29.13    0.61
   0  -7   2   29.38    0.86
   0  -7   2   28.80    0.58
  -1   7  -2  112.34    2.11
   1  -7   2  114.05    1.83
   1  -7   2  113.63    2.04
   1  -7   2  113.33    2.08
   1  -7   2  112.52    2.16
   2  -7   2    2.86    0.31
   2  -7   2    2.06    0.29
   2  -7   2    2.47    0.30
   2  -7   2    2.66    0.31
   3  -7   2    6.09    0.46
   3  -7   2    6.03    0.47
   3  -7   2    5.15    0.44
   3  -7   2    6.17    0.50
   4  -7   2    0.03    0.30
   4  -7   2   -0.36    0.25
   4  -7   2   -0.22    0.26
   4  -7   2    0.01    0.22
   4  -7   2   -0.11    0.23
   5  -7   2    8.25    0.35
   5  -7   2    8.32    0.53
   5  -7   2    8.98    0.57
   5  -7   2    7.91    0.60
   5  -7   2    8.70    0.68
   6  -7   2    0.42    0.36
   6  -7   2    0.06    0.19
   6  -7   2   -0.28    0.28
   6  -7   2    0.21    0.15
   6  -7   2    0.36    0.26
   6  -7   2   -0.30    0.30
  -7   7  -2    1.38    0.43
   7  -7   2    2.03    0.23
   7  -7   2    1.76    0.31
   7  -7   2    2.26    0.29
   7  -7   2    1.45    0.46
   7  -7   2    1.16    0.41
   7  -7   2    1.50    0.37
   7  -7   2    1.80    0.30
  -8   7  -2    3.05    0.36
  -8   7  -2    3.50    0.35
  -8   7  -2    3.10    0.51
   8  -7   2    3.32    0.37
   8  -7   2    3.65    0.40
   8  -7   2    3.40    0.38
   8  -7   2    2.62    0.47
   8  -7   2    3.30    0.39
   8  -7   2    3.30    0.41
   8  -7   2    3.28    0.55
   8  -7   2    3.14    0.38
  -9   7  -2   55.05    1.27
  -9   7  -2   55.06    1.13
   9  -7   2   56.45    1.21
   9  -7   2   55.40    1.18
   9  -7   2   57.01    1.73
   9  -7   2   56.26    1.37
   9  -7   2   54.85    1.59
   9  -7   2   54.90    1.24
   9  -7   2   53.55    1.19
   9  -7   2   52.45    1.29
 -10   7  -2    0.33    0.31
 -10   7  -2    1.11    0.44
 -10   7  -2   -0.23    0.59
  10  -7   2    0.15    0.39
  10  -7   2    0.56    0.50
  10  -7   2    0.34    0.31
  10  -7   2    0.91    0.72
  10  -7   2    0.37    0.47
 -11   7  -2    6.88    0.92
 -11   7  -2    6.08    0.65
 -11   7  -2    4.78    0.46
  11  -7   2    3.89    0.69
  11  -7   2    5.70    0.79
  11  -7   2    5.46    0.59
  11  -7   2    6.18    0.63
 -12   7  -2    8.34    0.79
 -12   7  -2    7.28    0.77
 -12   7  -2    8.29    1.11
  12  -7   2    7.86    0.80
  12  -7   2    8.84    0.95
  13   6  -2    0.41    0.99
  13   6  -2    0.43    0.69
  13   6  -2   -0.79    0.74
 -13  -6   2   -0.40    0.93
 -13  -6   2   -0.97    0.87
 -13  -6   2    0.95    0.78
  12   6  -2    0.18    0.60
  12   6  -2    1.59    0.87
  12   6  -2   -0.10    0.62
  12   6  -2    2.88    1.21
  12   6  -2    1.89    1.02
 -12  -6   2    1.16    0.89
 -12  -6   2    1.06    0.98
 -12  -6   2    2.21    0.71
 -12  -6   2    0.77    0.79
  11   6  -2    7.87    0.97
  11   6  -2    5.96    0.62
  11   6  -2    6.84    0.82
  11   6  -2    6.05    0.67
  11   6  -2    4.59    0.87
 -11  -6   2    5.75    0.73
 -11  -6   2    7.22    0.78
 -11  -6   2    6.81    0.91
 -11  -6   2    8.51    0.98
  10   6  -2   34.98    1.11
  10   6  -2   34.82    1.56
  10   6  -2   36.95    1.38
  10   6  -2   34.42    1.47
  10   6  -2   34.55    1.19
 -10  -6   2   36.48    1.33
 -10  -6   2   35.83    1.49
 -10  -6   2   34.43    1.26
 -10  -6   2   33.32    1.36
   9   6  -2   -0.26    0.37
   9   6  -2    0.53    0.34
   9   6  -2    0.31    0.46
   9   6  -2    0.01    0.48
   9   6  -2   -0.08    0.54
   9   6  -2    0.47    0.54
  -9  -6   2   -0.45    0.48
  -9  -6   2   -0.25    0.40
  -9  -6   2    0.40    0.45
  -9  -6   2   -1.04    0.42
  -9  -6   2    0.66    0.47
   8   6  -2   32.18    1.19
   8   6  -2   34.30    1.18
   8   6  -2   34.53    0.96
   8   6  -2   34.78    1.03
   8   6  -2   34.85    1.16
  -8  -6   2   33.27    1.07
  -8  -6   2   34.65    1.19
  -8  -6   2   33.90    1.09
  -8  -6   2   34.91    1.19
   7   6  -2   -0.20    0.26
   7   6  -2   -0.10    0.35
   7   6  -2    0.07    0.26
   7   6  -2    0.09    0.31
   7   6  -2    0.13    0.38
  -7  -6   2   -0.07    0.35
  -7  -6   2   -0.03    0.30
  -7  -6   2    0.25    0.36
  -7  -6   2   -0.17    0.31
  -7  -6   2    0.12    0.33
   6   6  -2   52.00    1.18
   6   6  -2   51.86    1.27
   6   6  -2   52.33    1.33
   6   6  -2   50.14    1.25
   6   6  -2   52.94    1.13
  -6  -6   2   52.20    1.36
  -6  -6   2   53.06    1.31
  -6  -6   2   51.28    1.22
  -6  -6   2   51.33    1.34
  -6  -6   2   53.32    1.19
  -6  -6   2   50.66    1.22
   5   6  -2   67.11    1.47
   5   6  -2   69.97    1.47
   5   6  -2   68.97    1.36
   5   6  -2   68.60    1.39
   5   6  -2   70.06    1.55
  -5  -6   2   70.80    1.50
  -5  -6   2   70.97    1.58
  -5  -6   2   66.55    1.47
  -5  -6   2   70.67    1.39
  -5  -6   2   70.98    1.56
  -5  -6   2   69.80    1.44
   4   6  -2   13.96    0.56
   4   6  -2   12.01    0.46
   4   6  -2   13.39    0.56
   4   6  -2   13.06    0.60
   4   6  -2   13.54    0.47
  -4  -6   2   13.42    0.57
  -4  -6   2   13.73    0.47
  -4  -6   2   14.38    0.60
  -4  -6   2   12.79    0.51
  -4  -6   2   13.87    0.53
  -4  -6   2   13.19    0.65
   3   6  -2    0.54    0.18
   3   6  -2    0.34    0.20
   3   6  -2    0.59    0.17
   3   6  -2   -0.14    0.21
  -3  -6   2    0.17    0.19
  -3  -6   2    0.31    0.18
  -3  -6   2    0.41    0.18
  -3  -6   2    0.62    0.17
  -3  -6   2    0.57    0.23
  -3  -6   2    0.25    0.24
   2   6  -2   19.14    0.57
   2   6  -2   19.88    0.54
   2   6  -2   19.89    0.49
   2   6  -2   19.19    0.53
   2   6  -2   18.51    0.62
   2   6  -2   19.54    0.54
  -2  -6   2   19.42    0.60
  -2  -6   2   19.92    0.54
  -2  -6   2   19.49    0.51
  -2  -6   2   19.08    0.68
  -2  -6   2   19.44    0.52
  -2  -6   2   18.75    0.50
   1   6  -2   17.80    0.42
   1   6  -2   17.15    0.48
   1   6  -2   17.83    0.58
   1   6  -2   16.92    0.52
   1   6  -2   17.69    0.47
   1   6  -2   17.99    0.47
  -1  -6   2   18.03    0.56
  -1  -6   2   18.05    0.64
  -1  -6   2   15.75    0.50
  -1  -6   2   17.40    0.48
  -1  -6   2   18.20    0.47
  -1  -6   2   17.63    0.46
   0   6  -2    4.12    0.35
   0   6  -2    4.47    0.23
   0   6  -2    4.16    0.23
   0   6  -2    4.49    0.35
   0  -6   2    4.91    0.36
   0  -6   2    4.53    0.23
   0  -6   2    4.24    0.21
   0  -6   2    4.12    0.23
   0  -6   2    4.94    0.42
   0  -6   2    4.37    0.30
  -1   6  -2   -0.06    0.20
   1  -6   2   -0.12    0.18
   1  -6   2   -0.15    0.18
   1  -6   2    0.24    0.19
   2  -6   2   18.42    0.61
   2  -6   2   19.74    0.61
   2  -6   2   18.37    0.60
   2  -6   2   20.01    0.63
   2  -6   2   19.30    0.62
   3  -6   2    0.28    0.23
   3  -6   2    0.82    0.21
   3  -6   2    0.71    0.21
   3  -6   2    0.47    0.23
   4  -6   2    1.12    0.27
   4  -6   2    0.99    0.26
   4  -6   2    1.31    0.24
   4  -6   2    0.77    0.29
   4  -6   2    0.58    0.25
   5  -6   2   10.24    0.37
   5  -6   2    9.62    0.51
   5  -6   2   10.16    0.31
   5  -6   2    9.85    0.59
   5  -6   2    9.73    0.48
   5  -6   2   10.67    0.59
  -6   6  -2    2.20    0.38
  -6   6  -2    2.43    0.24
  -6   6  -2    2.09    0.24
   6  -6   2    2.58    0.21
   6  -6   2    2.14    0.37
   6  -6   2    2.25    0.32
   6  -6   2    2.65    0.26
   6  -6   2    2.56    0.25
   6  -6   2    2.56    0.43
   6  -6   2    2.24    0.29
   6  -6   2    2.35    0.26
  -7   6  -2   17.46    0.83
  -7   6  -2   15.99    0.47
  -7   6  -2   15.26    0.56
   7  -6   2   15.41    0.64
   7  -6   2   16.00    0.59
   7  -6   2   15.96    0.52
   7  -6   2   15.28    0.58
   7  -6   2   16.21    0.49
   7  -6   2   15.91    0.83
   7  -6   2   16.68    0.62
   7  -6   2   16.48    0.79
  -8   6  -2   50.99    1.43
  -8   6  -2   52.51    1.05
  -8   6  -2   51.06    1.16
   8  -6   2   51.49    1.22
   8  -6   2   51.16    1.15
   8  -6   2   51.98    1.47
   8  -6   2   51.10    1.10
   8  -6   2   52.00    1.42
   8  -6   2   52.23    1.10
   8  -6   2   52.96    1.18
   8  -6   2   44.77    1.30
  -9   6  -2    8.61    0.67
  -9   6  -2    7.75    0.51
  -9   6  -2    7.86    0.85
   9  -6   2    8.79    0.70
   9  -6   2    8.19    0.81
   9  -6   2    7.66    0.57
   9  -6   2    7.92    0.50
   9  -6   2    8.63    0.92
   9  -6   2    6.87    0.47
   9  -6   2    7.52    0.71
 -10   6  -2   13.79    1.09
 -10   6  -2   13.38    0.66
 -10   6  -2   12.26    0.82
  10  -6   2   12.70    0.90
  10  -6   2   13.55    0.99
  10  -6   2   13.03    0.77
  10  -6   2   12.82    0.65
  10  -6   2   15.33    1.22
 -11   6  -2    1.85    0.72
 -11   6  -2    0.93    0.40
 -11   6  -2    1.43    0.57
  11  -6   2    1.51    0.62
  11  -6   2    1.41    0.39
  11  -6   2    2.54    0.83
  11  -6   2    0.33    0.63
 -12   6  -2    0.78    0.44
 -12   6  -2    1.46    0.69
 -12   6  -2    0.68    0.86
  12  -6   2   -0.04    0.66
  12  -6   2    0.33    0.43
  13   5  -2    2.09    0.74
  13   5  -2    2.94    0.97
  13   5  -2    4.17    1.57
  13   5  -2    3.91    0.76
 -13  -5   2    3.18    1.08
 -13  -5   2    4.30    0.94
  12   5  -2   33.19    1.91
  12   5  -2   30.85    1.60
  12   5  -2   29.48    1.97
  12   5  -2   29.62    1.31
  12   5  -2   28.86    1.21
 -12  -5   2   30.38    1.62
 -12  -5   2   29.96    1.32
 -12  -5   2   29.79    1.40
  11   5  -2    5.08    0.64
  11   5  -2    4.77    0.75
  11   5  -2    3.42    0.86
  11   5  -2    4.75    0.57
  11   5  -2    4.51    0.94
 -11  -5   2    4.34    0.78
 -11  -5   2    4.82    0.68
 -11  -5   2    4.22    0.85
 -11  -5   2    4.58    0.65
  10   5  -2   -0.20    0.49
  10   5  -2   -0.76    0.62
  10   5  -2   -0.16    0.66
  10   5  -2    0.00    0.58
  10   5  -2   -0.02    0.41
  10   5  -2    0.44    0.36
 -10  -5   2    0.33    0.57
 -10  -5   2    0.36    0.48
 -10  -5   2   -0.99    0.65
 -10  -5   2    0.58    0.53
 -10  -5   2   -0.48    0.45
   9   5  -2    6.53    0.79
   9   5  -2    5.90    0.70
   9   5  -2    5.70    0.65
   9   5  -2    7.15    0.59
   9   5  -2    5.60    0.66
  -9  -5   2    6.33    0.60
  -9  -5   2    6.42    0.75
  -9  -5   2    6.20    0.59
  -9  -5   2    6.26    0.60
   8   5  -2   25.75    0.99
   8   5  -2   27.05    0.83
   8   5  -2   26.18    1.02
   8   5  -2   26.08    1.05
   8   5  -2   27.18    0.89
  -8  -5   2   25.64    1.05
  -8  -5   2   26.52    0.94
  -8  -5   2   27.41    1.05
  -8  -5   2   25.43    0.98
  -8  -5   2   27.65    0.96
   7   5  -2    1.28    0.28
   7   5  -2    0.44    0.33
   7   5  -2    1.03    0.32
   7   5  -2    0.91    0.36
   7   5  -2    0.64    0.29
  -7  -5   2    0.73    0.38
  -7  -5   2    0.94    0.37
  -7  -5   2    0.60    0.37
  -7  -5   2    1.40    0.36
  -7  -5   2    1.21    0.33
   6   5  -2   -0.12    0.21
   6   5  -2    0.55    0.20
   6   5  -2    0.30    0.29
   6   5  -2    0.15    0.28
   6   5  -2    0.31    0.28
  -6  -5   2    0.06    0.31
  -6  -5   2   -0.12    0.25
  -6  -5   2    0.53    0.31
  -6  -5   2    0.34    0.26
  -6  -5   2   -0.12    0.29
   5   5  -2    5.37    0.48
   5   5  -2    4.57    0.45
   5   5  -2    5.68    0.34
   5   5  -2    5.04    0.41
   5   5  -2    4.55    0.47
  -5  -5   2    4.77    0.47
  -5  -5   2    5.31    0.37
  -5  -5   2    3.99    0.43
  -5  -5   2    4.95    0.43
  -5  -5   2    5.21    0.50
  -5  -5   2    4.76    0.50
   4   5  -2  141.57    2.45
   4   5  -2  141.37    2.42
   4   5  -2  143.97    2.58
   4   5  -2  141.08    2.51
   4   5  -2  144.52    2.52
  -4  -5   2  144.02    2.49
  -4  -5   2  142.93    2.53
  -4  -5   2  140.95    2.49
  -4  -5   2  142.48    2.43
  -4  -5   2  142.87    2.61
  -4  -5   2  142.86    2.59
   3   5  -2   29.69    0.66
   3   5  -2   28.32    0.75
   3   5  -2   30.02    0.73
   3   5  -2   30.20    0.79
  -3  -5   2   29.44    0.71
  -3  -5   2   30.21    0.66
  -3  -5   2   30.31    0.74
  -3  -5   2   30.79    0.79
  -3  -5   2   29.62    0.83
  -3  -5   2   30.42    0.70
   2   5  -2   67.75    1.28
   2   5  -2   69.01    1.36
   2   5  -2   69.84    1.26
   2   5  -2   68.62    1.23
  -2  -5   2   68.73    1.29
  -2  -5   2   69.71    1.23
  -2  -5   2   69.69    1.35
  -2  -5   2   70.73    1.27
  -2  -5   2   68.76    1.40
  -2  -5   2   68.54    1.25
   1   5  -2   20.48    0.60
   1   5  -2   21.30    0.51
   1   5  -2   20.60    0.50
   1   5  -2   21.35    0.46
   1   5  -2   21.02    0.53
   1   5  -2   21.42    0.52
  -1  -5   2   21.58    0.64
  -1  -5   2   21.10    0.50
  -1  -5   2   21.37    0.49
  -1  -5   2   22.10    0.59
  -1  -5   2   21.13    0.48
  -1  -5   2   21.13    0.49
   0   5  -2    0.18    0.08
   0   5  -2    0.21    0.16
   0   5  -2    0.40    0.18
   0   5  -2    0.18    0.10
   0   5  -2    0.13    0.10
   0  -5   2    0.20    0.09
   0  -5   2    0.14    0.10
   0  -5   2    0.15    0.10
   0  -5   2    0.18    0.13
   0  -5   2    0.13    0.16
   0  -5   2    0.26    0.18
   1  -5   2  171.54    2.91
   1  -5   2  172.55    2.87
   1  -5   2  172.10    2.95
   2  -5   2    8.52    0.42
   2  -5   2    8.94    0.42
   2  -5   2    7.99    0.41
   3  -5   2   77.04    1.53
   3  -5   2   79.78    1.56
   3  -5   2   78.93    1.50
   3  -5   2   80.04    1.53
  -4   5  -2   15.97    0.59
   4  -5   2   15.15    0.58
   4  -5   2   15.72    0.57
   4  -5   2   15.49    0.54
  -5   5  -2   32.43    0.67
  -5   5  -2   32.55    0.62
  -5   5  -2   32.82    0.90
   5  -5   2   31.01    0.90
   5  -5   2   31.26    0.88
   5  -5   2   31.59    0.80
   5  -5   2   31.62    0.69
   5  -5   2   32.29    0.64
   5  -5   2   32.09    0.64
  -6   5  -2    2.76    0.26
  -6   5  -2    3.28    0.34
  -6   5  -2    2.72    0.37
   6  -5   2    3.13    0.41
   6  -5   2    2.87    0.29
   6  -5   2    2.93    0.33
   6  -5   2    2.48    0.27
   6  -5   2    2.94    0.32
   6  -5   2    2.80    0.38
  -7   5  -2    4.39    0.44
  -7   5  -2    4.89    0.61
  -7   5  -2    5.42    0.34
   7  -5   2    4.94    0.62
   7  -5   2    5.21    0.56
   7  -5   2    5.26    0.45
   7  -5   2    5.49    0.34
   7  -5   2    4.67    0.41
   7  -5   2    5.92    0.40
  -8   5  -2   11.04    0.77
  -8   5  -2   11.33    0.50
  -8   5  -2   12.16    0.62
   8  -5   2   11.94    0.83
   8  -5   2   11.55    0.73
   8  -5   2   12.34    0.49
   8  -5   2   11.30    0.64
   8  -5   2   11.12    0.49
   8  -5   2   11.46    0.58
   8  -5   2   11.98    0.54
   8  -5   2   12.22    0.55
  -9   5  -2   43.55    1.02
  -9   5  -2   43.00    1.14
  -9   5  -2   42.98    1.38
   9  -5   2   42.60    1.39
   9  -5   2   43.13    1.15
   9  -5   2   43.42    1.22
   9  -5   2   43.82    1.31
   9  -5   2   43.41    1.09
   9  -5   2   43.11    1.01
 -10   5  -2    4.46    0.55
 -10   5  -2    4.71    0.66
 -10   5  -2    4.12    0.43
  10  -5   2    4.10    0.58
  10  -5   2    4.37    0.60
  10  -5   2    4.57    0.50
  10  -5   2    4.91    0.62
  10  -5   2    4.45    0.54
  10  -5   2    4.43    0.68
 -11   5  -2    3.30    0.45
 -11   5  -2    3.52    0.76
 -11   5  -2    4.27    0.59
  11  -5   2    3.51    0.44
  11  -5   2    4.73    0.61
  11  -5   2    4.22    0.66
  11  -5   2    3.80    0.65
 -12   5  -2   -0.74    0.75
 -12   5  -2   -0.56    0.59
 -12   5  -2    0.44    0.44
  12  -5   2    1.23    0.64
  12  -5   2    0.33    0.43
  12  -5   2    0.37    0.63
  13   4  -2   17.14    1.33
  13   4  -2   17.47    1.64
  13   4  -2   18.23    1.17
 -13  -4   2   17.35    1.68
 -13  -4   2   16.51    1.39
  12   4  -2    8.13    1.12
  12   4  -2    9.84    0.97
  12   4  -2   15.04    1.68
  12   4  -2   10.88    1.06
  12   4  -2    9.49    0.93
 -12  -4   2    9.61    1.11
 -12  -4   2    9.31    0.93
 -12  -4   2    9.90    1.26
  11   4  -2    6.05    0.80
  11   4  -2    6.36    0.60
  11   4  -2    7.16    0.80
  11   4  -2    7.84    0.80
  11   4  -2    4.58    0.76
 -11  -4   2    5.64    0.62
 -11  -4   2    7.09    0.87
 -11  -4   2    6.77    0.71
 -11  -4   2    6.01    0.82
 -11  -4   2    6.67    0.82
  10   4  -2    1.03    0.54
  10   4  -2    0.48    0.51
  10   4  -2    0.54    0.65
  10   4  -2    0.26    0.42
  10   4  -2   -0.70    0.69
  10   4  -2    0.27    0.37
 -10  -4   2    0.75    0.52
 -10  -4   2    1.37    0.59
 -10  -4   2    1.76    0.46
 -10  -4   2    0.41    0.46
 -10  -4   2    1.18    0.64
   9   4  -2    0.87    0.39
   9   4  -2    0.90    0.45
   9   4  -2    1.11    0.46
   9   4  -2    1.83    0.37
   9   4  -2    1.89    0.57
   9   4  -2    2.40    0.53
  -9  -4   2    1.86    0.50
  -9  -4   2    2.13    0.44
  -9  -4   2    2.01    0.50
  -9  -4   2    1.43    0.41
  -9  -4   2    1.92    0.54
   8   4  -2    0.24    0.27
   8   4  -2    0.26    0.26
   8   4  -2    0.41    0.42
   8   4  -2   -0.04    0.32
   8   4  -2    0.67    0.40
  -8  -4   2    0.40    0.37
  -8  -4   2    0.92    0.43
  -8  -4   2    0.72    0.34
  -8  -4   2    0.46    0.31
  -8  -4   2    0.05    0.35
   7   4  -2    4.70    0.55
   7   4  -2    5.93    0.50
   7   4  -2    4.91    0.56
   7   4  -2    5.46    0.58
   7   4  -2    5.18    0.43
  -7  -4   2    4.92    0.57
  -7  -4   2    6.02    0.56
  -7  -4   2    6.09    0.60
  -7  -4   2    5.22    0.53
  -7  -4   2    5.52    0.53
   6   4  -2    1.15    0.30
   6   4  -2    1.35    0.30
   6   4  -2    1.25    0.22
   6   4  -2    1.86    0.35
   6   4  -2    1.04    0.24
  -6  -4   2    1.37    0.31
  -6  -4   2    1.63    0.32
  -6  -4   2    1.84    0.29
  -6  -4   2    1.68    0.30
  -6  -4   2    1.75    0.28
   5   4  -2   92.59    1.81
   5   4  -2   88.31    1.75
   5   4  -2   89.28    1.64
   5   4  -2   88.87    1.67
  -5  -4   2   89.02    1.82
  -5  -4   2   92.94    1.69
  -5  -4   2   92.05    1.72
  -5  -4   2   89.73    1.77
  -5  -4   2   90.10    1.72
  -5  -4   2   93.11    1.79
   4   4  -2    1.26    0.17
   4   4  -2    1.17    0.21
   4   4  -2    2.18    0.29
   4   4  -2    1.07    0.20
   4   4  -2    1.52    0.26
  -4  -4   2    1.42    0.19
  -4  -4   2    1.56    0.23
  -4  -4   2    1.54    0.26
  -4  -4   2    1.29    0.22
  -4  -4   2    1.84    0.28
   3   4  -2    3.55    0.32
   3   4  -2    3.77    0.32
   3   4  -2    4.02    0.24
   3   4  -2    3.93    0.34
   3   4  -2    3.76    0.26
  -3  -4   2    3.95    0.30
  -3  -4   2    4.15    0.37
  -3  -4   2    4.05    0.32
  -3  -4   2    4.17    0.35
  -3  -4   2    3.64    0.30
  -3  -4   2    4.07    0.25
   2   4  -2   62.88    1.12
   2   4  -2   61.87    1.16
   2   4  -2   62.94    1.23
  -2  -4   2   63.96    1.26
  -2  -4   2   62.43    1.14
  -2  -4   2   62.37    1.17
  -2  -4   2   62.21    1.15
  -2  -4   2   64.66    1.23
  -2  -4   2   62.74    1.11
   1   4  -2   71.97    1.33
   1   4  -2   71.42    1.25
   1   4  -2   71.20    1.24
   1   4  -2   70.22    1.23
   1   4  -2   69.36    1.23
   1   4  -2   71.27    1.20
  -1  -4   2   70.61    1.24
  -1  -4   2   70.12    1.35
  -1  -4   2   70.02    1.21
  -1  -4   2   70.80    1.32
  -1  -4   2   70.10    1.22
  -1  -4   2   69.92    1.21
   0   4  -2   53.65    1.05
   0   4  -2   53.33    0.92
   0   4  -2   48.53    0.96
   0   4  -2   54.06    0.92
   0   4  -2   54.21    0.89
   0   4  -2   55.18    1.01
   0  -4   2   54.69    1.08
   0  -4   2   54.61    1.05
   0  -4   2   54.45    0.93
   0  -4   2   54.90    0.92
   0  -4   2   53.76    0.98
   1  -4   2   10.70    0.39
   1  -4   2   10.32    0.36
   2  -4   2   56.18    1.10
   2  -4   2   55.31    1.10
   2  -4   2   55.14    1.10
   3  -4   2    4.65    0.34
   3  -4   2    4.55    0.35
   3  -4   2    4.37    0.35
  -4   4  -2   67.87    1.39
  -4   4  -2   67.80    1.18
  -4   4  -2   69.43    1.15
   4  -4   2   68.28    1.16
   4  -4   2   68.02    1.31
   4  -4   2   68.72    1.18
   4  -4   2   70.72    1.17
   4  -4   2   67.92    1.38
   4  -4   2   69.80    1.40
  -5   4  -2   71.42    1.22
  -5   4  -2   68.75    1.27
  -5   4  -2   70.51    1.48
   5  -4   2   69.99    1.35
   5  -4   2   70.15    1.23
   5  -4   2   69.61    1.26
   5  -4   2   70.79    1.48
   5  -4   2   70.57    1.45
   5  -4   2   69.39    1.24
  -6   4  -2   29.42    0.73
  -6   4  -2   30.02    0.67
  -6   4  -2   29.57    0.90
   6  -4   2   30.55    0.71
   6  -4   2   28.59    0.68
   6  -4   2   30.91    0.88
   6  -4   2   29.48    1.07
   6  -4   2   29.53    0.66
   6  -4   2   29.39    0.73
  -7   4  -2    5.41    0.46
  -7   4  -2    5.14    0.37
  -7   4  -2    5.23    0.59
   7  -4   2    4.92    0.53
   7  -4   2    5.22    0.42
   7  -4   2    4.23    0.39
   7  -4   2    5.00    0.60
   7  -4   2    5.24    0.40
   7  -4   2    4.62    0.34
  -8   4  -2    4.05    0.51
  -8   4  -2    4.24    0.42
  -8   4  -2    3.89    0.34
   8  -4   2    4.54    0.40
   8  -4   2    3.74    0.54
   8  -4   2    3.61    0.43
   8  -4   2    3.59    0.40
   8  -4   2    3.30    0.40
   8  -4   2    4.20    0.37
  -9   4  -2    9.46    0.68
  -9   4  -2   11.20    0.86
   9  -4   2   11.02    0.85
   9  -4   2   10.44    0.67
   9  -4   2   11.15    0.64
   9  -4   2   10.05    0.87
 -10   4  -2    0.92    0.55
 -10   4  -2    0.40    0.43
 -10   4  -2    0.02    0.32
  10  -4   2   -0.19    0.28
  10  -4   2    0.53    0.44
  10  -4   2   -0.37    0.45
  10  -4   2    0.03    0.38
  10  -4   2   -0.12    0.53
  10  -4   2    0.00    0.42
 -11   4  -2    6.71    0.70
 -11   4  -2    6.53    0.81
 -11   4  -2    5.95    0.67
  11  -4   2    6.85    0.66
  11  -4   2    6.84    0.77
  11  -4   2    6.13    0.61
  11  -4   2    6.28    0.87
  11  -4   2    7.78    0.90
 -12   4  -2    0.74    0.45
 -12   4  -2    2.00    0.83
 -12   4  -2    1.16    0.64
  12  -4   2    0.58    0.41
  12  -4   2    1.01    0.76
  12  -4   2    1.21    0.62
  12  -4   2    0.24    0.57
 -13   4  -2    4.29    0.63
 -13   4  -2    4.58    1.07
  13  -4   2    4.95    0.82
  13  -4   2    4.13    0.62
  13   3  -2    0.80    0.61
  13   3  -2   -0.70    0.57
  13   3  -2   -0.50    0.76
 -13  -3   2    0.25    0.74
 -13  -3   2    0.85    0.96
  12   3  -2    7.54    0.92
  12   3  -2    6.92    0.71
  12   3  -2    7.51    0.85
  12   3  -2    7.32    1.04
  12   3  -2    9.04    1.22
 -12  -3   2    7.75    0.95
 -12  -3   2    6.91    0.76
 -12  -3   2    8.12    0.81
  11   3  -2    4.43    0.55
  11   3  -2    5.14    0.58
  11   3  -2    3.38    0.80
  11   3  -2    4.03    0.77
  11   3  -2    5.35    0.71
 -11  -3   2    5.00    0.79
 -11  -3   2    5.72    0.64
 -11  -3   2    4.69    0.76
 -11  -3   2    5.32    0.53
  10   3  -2    1.36    0.64
  10   3  -2    1.47    0.53
  10   3  -2    1.98    0.40
  10   3  -2    1.95    0.59
  10   3  -2    1.60    0.43
  10   3  -2    0.91    0.62
 -10  -3   2    1.80    0.41
 -10  -3   2    1.34    0.61
 -10  -3   2    2.21    0.48
 -10  -3   2    2.57    0.60
 -10  -3   2    1.91    0.58
   9   3  -2    0.27    0.48
   9   3  -2    0.48    0.48
   9   3  -2    0.55    0.39
   9   3  -2    0.09    0.28
   9   3  -2    0.00    0.31
   9   3  -2   -0.15    0.41
  -9  -3   2    0.24    0.34
  -9  -3   2    0.01    0.42
  -9  -3   2   -0.26    0.34
  -9  -3   2   -0.27    0.41
  -9  -3   2    0.30    0.48
   8   3  -2   58.71    1.34
   8   3  -2   59.30    1.53
   8   3  -2   60.38    1.48
   8   3  -2   58.42    1.30
   8   3  -2   59.34    1.44
  -8  -3   2   59.65    1.49
  -8  -3   2   60.12    1.39
  -8  -3   2   60.37    1.45
  -8  -3   2   57.60    1.53
  -8  -3   2   57.87    1.33
   7   3  -2    0.90    0.24
   7   3  -2    0.83    0.26
   7   3  -2    1.10    0.33
   7   3  -2    0.57    0.30
   7   3  -2    0.92    0.34
  -7  -3   2    0.79    0.25
  -7  -3   2    0.59    0.31
  -7  -3   2    0.66    0.29
  -7  -3   2    0.68    0.32
  -7  -3   2    0.54    0.32
   6   3  -2    1.85    0.25
   6   3  -2    2.28    0.26
   6   3  -2    2.67    0.33
   6   3  -2    2.51    0.35
   6   3  -2    2.12    0.30
  -6  -3   2    2.33    0.28
  -6  -3   2    2.22    0.33
  -6  -3   2    3.00    0.32
  -6  -3   2    2.26    0.29
  -6  -3   2    1.57    0.32
   5   3  -2   49.65    1.14
   5   3  -2   48.82    0.99
   5   3  -2   48.66    1.09
   5   3  -2   50.17    1.04
   5   3  -2   48.68    1.09
  -5  -3   2   48.98    1.11
  -5  -3   2   49.58    1.04
  -5  -3   2   49.54    1.08
  -5  -3   2   48.48    1.06
   4   3  -2   77.06    1.48
   4   3  -2   77.34    1.39
   4   3  -2   77.57    1.53
   4   3  -2   76.38    1.48
  -4  -3   2   76.74    1.49
  -4  -3   2   79.14    1.55
  -4  -3   2   77.94    1.46
  -4  -3   2   78.04    1.49
  -4  -3   2   77.66    1.42
   3   3  -2   49.45    0.91
   3   3  -2   48.02    0.94
   3   3  -2   49.57    1.03
   3   3  -2   48.67    0.99
   3   3  -2   49.48    0.99
  -3  -3   2   49.60    0.97
  -3  -3   2   49.66    0.96
  -3  -3   2   48.63    1.03
  -3  -3   2   47.84    0.99
  -3  -3   2   47.52    1.01
  -3  -3   2   49.08    0.92
   2   3  -2    0.98    0.17
   2   3  -2    1.14    0.17
   2   3  -2    1.18    0.16
  -2  -3   2    1.28    0.17
  -2  -3   2    1.49    0.20
  -2  -3   2    0.83    0.15
  -2  -3   2    1.17    0.18
  -2  -3   2    1.08    0.14
  -2  -3   2    1.80    0.17
   1   3  -2    0.39    0.09
   1   3  -2    0.45    0.11
   1   3  -2    0.36    0.11
   1   3  -2    0.45    0.12
   1   3  -2    0.71    0.15
   1   3  -2    0.64    0.10
  -1  -3   2    0.38    0.09
  -1  -3   2    0.60    0.15
  -1  -3   2    0.51    0.11
  -1  -3   2    0.64    0.12
  -1  -3   2    0.59    0.14
  -1  -3   2    0.61    0.10
   0   3  -2    4.95    0.18
   0   3  -2    4.81    0.19
   0   3  -2    4.48    0.23
   0   3  -2    5.00    0.15
   0   3  -2    4.86    0.18
   0   3  -2    4.85    0.28
   0  -3   2    4.61    0.20
   0  -3   2    5.18    0.17
   0  -3   2    5.03    0.19
   0  -3   2    4.93    0.16
   0  -3   2    4.90    0.27
   1  -3   2   89.65    1.57
   1  -3   2   89.41    1.53
   2  -3   2   96.96    1.69
   2  -3   2   96.29    1.71
   2  -3   2   97.88    1.69
  -3   3  -2    2.64    0.17
  -3   3  -2    3.06    0.15
  -3   3  -2    3.02    0.30
   3  -3   2    2.74    0.15
   3  -3   2    3.01    0.28
   3  -3   2    3.24    0.27
   3  -3   2    3.12    0.16
   3  -3   2    2.84    0.14
   3  -3   2    3.03    0.29
  -4   3  -2   21.31    0.64
  -4   3  -2   21.36    0.45
  -4   3  -2   21.27    0.48
  -4   3  -2   21.23    0.53
   4  -3   2   20.92    0.47
   4  -3   2   21.45    0.56
   4  -3   2   21.06    0.45
   4  -3   2   21.12    0.46
   4  -3   2   20.48    0.63
   4  -3   2   20.43    0.60
  -5   3  -2   65.14    1.38
  -5   3  -2   66.83    1.23
  -5   3  -2   66.62    1.19
  -5   3  -2   66.88    1.41
  -5   3  -2   65.99    1.22
   5  -3   2   66.39    1.21
   5  -3   2   68.05    1.22
   5  -3   2   66.08    1.36
   5  -3   2   67.00    1.19
   5  -3   2   68.87    1.42
   5  -3   2   65.25    1.25
  -6   3  -2  117.20    2.27
  -6   3  -2  116.64    2.01
  -6   3  -2  119.52    2.03
  -6   3  -2  117.99    2.08
   6  -3   2  120.10    2.07
   6  -3   2  116.21    2.20
   6  -3   2  117.70    2.05
   6  -3   2  116.24    2.05
   6  -3   2  121.00    2.29
   6  -3   2  118.17    2.02
  -7   3  -2   44.23    1.02
  -7   3  -2   44.45    1.21
  -7   3  -2   45.91    1.20
  -7   3  -2   44.44    0.96
  -7   3  -2   43.66    0.89
   7  -3   2   44.16    0.94
   7  -3   2   44.93    1.12
   7  -3   2   43.31    0.98
   7  -3   2   44.13    1.21
   7  -3   2   44.17    1.00
   7  -3   2   43.27    0.93
  -8   3  -2   41.45    0.98
  -8   3  -2   43.95    1.25
  -8   3  -2   43.08    1.25
   8  -3   2   40.82    1.02
   8  -3   2   44.17    1.06
   8  -3   2   41.76    0.96
   8  -3   2   40.89    0.90
   8  -3   2   43.53    1.27
   8  -3   2   42.48    1.14
  -9   3  -2   34.00    0.92
  -9   3  -2   33.79    1.23
  -9   3  -2   34.65    1.21
   9  -3   2   34.39    1.23
   9  -3   2   34.77    1.08
   9  -3   2   33.45    0.97
   9  -3   2   33.20    0.99
   9  -3   2   33.23    0.88
 -10   3  -2   46.78    1.34
 -10   3  -2   48.33    1.55
 -10   3  -2   47.73    1.60
 -10   3  -2   47.06    1.19
  10  -3   2   47.61    1.58
  10  -3   2   47.52    1.34
  10  -3   2   50.19    1.17
  10  -3   2   47.39    1.37
  10  -3   2   47.47    1.28
 -11   3  -2   18.28    1.22
 -11   3  -2   19.61    0.88
 -11   3  -2   17.27    0.98
  11  -3   2   20.30    1.05
  11  -3   2   18.26    1.25
  11  -3   2   18.70    1.02
  11  -3   2   20.74    0.85
  11  -3   2   17.82    1.18
 -12   3  -2   48.87    1.39
 -12   3  -2   48.98    1.58
 -12   3  -2   50.55    1.86
  12  -3   2   49.32    1.58
  12  -3   2   50.93    1.35
  12  -3   2   46.48    1.86
  12  -3   2   52.18    1.60
 -13   3  -2    3.67    0.97
 -13   3  -2    4.93    0.63
  13  -3   2    4.89    0.80
  13  -3   2    5.07    0.64
  13   2  -2   14.65    1.43
  13   2  -2   15.62    1.15
  13   2  -2   15.15    1.19
 -13  -2   2   13.28    1.51
 -13  -2   2   13.28    1.30
  12   2  -2    0.43    0.66
  12   2  -2    0.55    0.85
  12   2  -2   -0.13    0.49
  12   2  -2    0.34    0.88
  12   2  -2   -0.77    0.48
 -12  -2   2   -0.23    0.75
 -12  -2   2    0.31    0.54
 -12  -2   2   -0.09    0.73
  11   2  -2   34.05    1.51
  11   2  -2   33.77    1.32
  11   2  -2   34.44    1.16
  11   2  -2   33.13    1.15
  11   2  -2   30.95    1.52
 -11  -2   2   33.03    1.46
 -11  -2   2   31.84    0.95
 -11  -2   2   30.54    1.40
 -11  -2   2   31.48    1.44
  10   2  -2    2.04    0.56
  10   2  -2    3.04    0.47
  10   2  -2    2.43    0.44
  10   2  -2    2.35    0.53
  10   2  -2    2.72    0.64
  10   2  -2    3.29    0.61
 -10  -2   2    1.90    0.37
 -10  -2   2    3.19    0.65
 -10  -2   2    2.11    0.63
 -10  -2   2    3.01    0.49
   9   2  -2   53.74    1.48
   9   2  -2   51.51    1.53
   9   2  -2   52.90    1.41
   9   2  -2   52.17    1.28
   9   2  -2   48.90    1.49
   9   2  -2   54.49    1.31
  -9  -2   2   51.52    1.44
  -9  -2   2   54.31    1.35
  -9  -2   2   52.34    1.19
  -9  -2   2   50.87    1.51
  -9  -2   2   52.78    1.45
   8   2  -2   31.46    1.08
   8   2  -2   33.87    0.93
   8   2  -2   32.48    1.00
   8   2  -2   31.93    0.90
   8   2  -2   27.41    1.53
  -8  -2   2   32.47    1.10
  -8  -2   2   34.49    1.05
  -8  -2   2   32.34    0.86
  -8  -2   2   33.18    1.05
  -8  -2   2   31.92    0.95
   7   2  -2   78.14    1.72
   7   2  -2   78.24    1.63
   7   2  -2   78.47    1.66
   7   2  -2   77.35    1.55
   7   2  -2   78.55    1.56
  -7  -2   2   81.22    1.66
  -7  -2   2   77.01    1.73
  -7  -2   2   77.31    1.52
  -7  -2   2   75.60    1.59
  -7  -2   2   79.13    1.68
   6   2  -2    8.65    0.51
   6   2  -2    9.05    0.42
   6   2  -2    9.62    0.45
   6   2  -2    9.24    0.50
   6   2  -2    8.45    0.64
  -6  -2   2    9.76    0.52
  -6  -2   2    9.24    0.50
  -6  -2   2    9.70    0.45
  -6  -2   2    9.27    0.48
   5   2  -2    6.10    0.42
   5   2  -2    7.10    0.43
   5   2  -2    6.98    0.35
   5   2  -2    7.36    0.45
  -5  -2   2    6.89    0.44
  -5  -2   2    6.75    0.39
  -5  -2   2    7.00    0.39
  -5  -2   2    6.54    0.40
   4   2  -2   15.48    0.50
   4   2  -2   15.36    0.51
   4   2  -2   15.74    0.44
   4   2  -2   16.56    0.55
   4   2  -2   16.35    0.47
  -4  -2   2   15.43    0.52
  -4  -2   2   16.38    0.49
  -4  -2   2   16.41    0.48
  -4  -2   2   16.28    0.50
  -4  -2   2   16.01    0.56
   3   2  -2  146.01    2.66
   3   2  -2  152.70    2.54
   3   2  -2  157.26    2.62
   3   2  -2  158.81    2.66
  -3  -2   2  159.96    2.61
  -3  -2   2  158.99    2.63
  -3  -2   2  160.73    2.57
   2   2  -2   57.41    1.08
   2   2  -2   55.85    1.04
   2   2  -2   57.48    1.05
   2   2  -2   57.85    0.98
   2   2  -2   59.13    1.09
   2   2  -2   55.62    1.01
  -2  -2   2   56.52    1.08
  -2  -2   2   57.08    1.05
  -2  -2   2   57.75    1.06
  -2  -2   2   56.03    0.99
  -2  -2   2   56.77    1.03
   1   2  -2  255.55    4.01
   1   2  -2  252.37    3.94
   1   2  -2  248.52    3.98
   1   2  -2  252.28    4.03
  -1  -2   2  252.94    3.94
  -1  -2   2  253.89    4.03
  -1  -2   2  246.08    3.97
  -1  -2   2  253.61    3.99
   0  -2   2  472.69    8.24
   0  -2   2  461.90    8.33
  -1   2  -2   55.96    1.02
   1  -2   2   57.32    1.03
  -2   2  -2   45.37    0.89
  -2   2  -2   46.12    0.86
  -2   2  -2   44.53    0.74
   2  -2   2   45.45    0.75
   2  -2   2   44.96    0.89
   2  -2   2   44.29    0.74
   2  -2   2   45.44    0.86
   2  -2   2   44.90    0.75
   2  -2   2   45.68    0.86
  -3   2  -2   15.80    0.48
  -3   2  -2   17.65    0.37
  -3   2  -2   18.18    0.50
  -3   2  -2   17.78    0.52
  -3   2  -2   18.06    0.45
   3  -2   2   17.87    0.38
   3  -2   2   17.90    0.47
   3  -2   2   17.64    0.51
   3  -2   2   18.16    0.39
   3  -2   2   17.82    0.36
   3  -2   2   17.23    0.48
  -4   2  -2   12.19    0.34
  -4   2  -2   12.35    0.46
  -4   2  -2   12.33    0.48
  -4   2  -2   11.97    0.39
  -4   2  -2   11.81    0.37
   4  -2   2   12.04    0.32
   4  -2   2   11.57    0.43
   4  -2   2   12.07    0.34
   4  -2   2   12.52    0.40
   4  -2   2   12.17    0.36
   4  -2   2   12.38    0.48
  -5   2  -2    3.24    0.36
  -5   2  -2    3.69    0.30
  -5   2  -2    3.48    0.26
  -5   2  -2    3.08    0.38
  -5   2  -2    3.64    0.28
   5  -2   2    3.53    0.34
   5  -2   2    3.53    0.24
   5  -2   2    3.58    0.28
   5  -2   2    3.31    0.29
   5  -2   2    3.25    0.40
   5  -2   2    3.63    0.27
  -6   2  -2   13.14    0.59
  -6   2  -2   13.54    0.60
  -6   2  -2   13.68    0.45
[truncated: 2,677,604 more chars]
