# Supplementary material
Source: MDPI journal article supplement (https://www.mdpi.com/2304-6740/7/10/117)
Supplement: s1 [file s1 › inorganics-584457-Supplementary Materials/CIF and CIFcheck files/K(18c6)Mn2.cif]

####################################################################### 
# 
# This file contains crystal structure data downloaded from the 
# Cambridge Structural Database (CSD) hosted by the Cambridge 
# Crystallographic Data Centre (CCDC).
# 
# Full information about CCDC data access policies and citation 
# guidelines are available at http://www.ccdc.cam.ac.uk/access/V1 
# 
# Audit and citation data items may have been added by the CCDC. 
# Please retain this information to preserve the provenance of 
# this file and to allow appropriate attribution of the data. 
# 
#######################################################################

data_k(18c6)mn6
_database_code_depnum_ccdc_archive 'CCDC 1918203'
loop_
_audit_author_name
_audit_author_address
'Igor Mueller'
;Philipps University Marburg
Germany
;
_audit_update_record             
;
2019-05-23 deposited with the CCDC.	2019-08-14 downloaded from the CCDC.
;
_audit_creation_date             2019-05-23
_audit_creation_method           
;
Olex2 1.2-alpha
(compiled 2018.07.26 svn.r3523 for OlexSys, GUI svn.r5532)
;
_shelx_SHELXL_version_number     2018/3
_audit_contact_author_address    Philipps-University
_audit_contact_author_email      gunnar.werncke@chemie.uni-marburg.de
_audit_contact_author_name       C.
_audit_contact_author_phone      +4964212825637
_publ_contact_author_id_orcid    299638391

_publ_section_references         
;
Dolomanov, O.V., Bourhis, L.J., Gildea, R.J, Howard, J.A.K. & Puschmann, H.
 (2009), J. Appl. Cryst. 42, 339-341.

Sheldrick, G.M. (2015). Acta Cryst. C71, 3-8.
;
_chemical_name_common            ?
_chemical_name_systematic        ?
_chemical_formula_moiety         
'0.25(C124 H248 K3 Mn4 N16 O18 Si16), 0.25(C12 H24 K O6)'
_chemical_formula_sum            'C34 H68 K Mn N4 O6 Si4'
_chemical_formula_weight         835.32
_chemical_absolute_configuration ?
_chemical_melting_point          ?
loop_
_atom_type_symbol
_atom_type_description
_atom_type_scat_dispersion_real
_atom_type_scat_dispersion_imag
_atom_type_scat_source
C C 0.0033 0.0016 'International Tables Vol C Tables 4.2.6.8 and 6.1.1.4'
H H 0.0000 0.0000 'International Tables Vol C Tables 4.2.6.8 and 6.1.1.4'
K K 0.2009 0.2494 'International Tables Vol C Tables 4.2.6.8 and 6.1.1.4'
Mn Mn 0.3368 0.7283 'International Tables Vol C Tables 4.2.6.8 and 6.1.1.4'
N N 0.0061 0.0033 'International Tables Vol C Tables 4.2.6.8 and 6.1.1.4'
O O 0.0106 0.0060 'International Tables Vol C Tables 4.2.6.8 and 6.1.1.4'
Si Si 0.0817 0.0704 'International Tables Vol C Tables 4.2.6.8 and 6.1.1.4'

_shelx_space_group_comment       
;
The symmetry employed for this shelxl refinement is uniquely defined
by the following loop, which should always be used as a source of
symmetry information in preference to the above space-group names.
They are only intended as comments.
;
_space_group_crystal_system      monoclinic
_space_group_IT_number           5
_space_group_name_H-M_alt        'C 1 2 1'
_space_group_name_Hall           'C 2y'
loop_
_space_group_symop_operation_xyz
'x, y, z'
'-x, y, -z'
'x+1/2, y+1/2, z'
'-x+1/2, y+1/2, -z'

_cell_length_a                   34.8403(17)
_cell_length_b                   18.4715(11)
_cell_length_c                   14.5302(8)
_cell_angle_alpha                90
_cell_angle_beta                 96.555(4)
_cell_angle_gamma                90
_cell_volume                     9289.8(9)
_cell_formula_units_Z            8
_cell_measurement_reflns_used    45955
_cell_measurement_temperature    150
_cell_measurement_theta_max      29.435
_cell_measurement_theta_min      1.83
_shelx_estimated_absorpt_T_max   0.965
_shelx_estimated_absorpt_T_min   0.873
_exptl_absorpt_coefficient_mu    0.518
_exptl_absorpt_correction_T_max  0.9764
_exptl_absorpt_correction_T_min  0.7891
_exptl_absorpt_correction_type   numerical
_exptl_absorpt_process_details   'STOE X-Area'
_exptl_absorpt_special_details   ?
_exptl_crystal_colour            'clear dark violet'
_exptl_crystal_colour_lustre     clear
_exptl_crystal_colour_modifier   dark
_exptl_crystal_colour_primary    violet
_exptl_crystal_density_diffrn    1.194
_exptl_crystal_density_meas      ?
_exptl_crystal_density_method    ?
_exptl_crystal_description       block
_exptl_crystal_F_000             3584
_exptl_crystal_size_max          0.27
_exptl_crystal_size_mid          0.18
_exptl_crystal_size_min          0.07
_exptl_transmission_factor_max   ?
_exptl_transmission_factor_min   ?
_diffrn_reflns_av_R_equivalents  0.0285
_diffrn_reflns_av_unetI/netI     0.0488
_diffrn_reflns_Laue_measured_fraction_full 1.000
_diffrn_reflns_Laue_measured_fraction_max 1.000
_diffrn_reflns_limit_h_max       43
_diffrn_reflns_limit_h_min       -45
_diffrn_reflns_limit_k_max       24
_diffrn_reflns_limit_k_min       -24
_diffrn_reflns_limit_l_max       18
_diffrn_reflns_limit_l_min       -18
_diffrn_reflns_number            52126
_diffrn_reflns_point_group_measured_fraction_full 1.000
_diffrn_reflns_point_group_measured_fraction_max 1.000
_diffrn_reflns_theta_full        25.242
_diffrn_reflns_theta_max         27.499
_diffrn_reflns_theta_min         1.834
_diffrn_ambient_temperature      150.0
_diffrn_detector_area_resol_mean ?
_diffrn_measured_fraction_theta_full 1.000
_diffrn_measured_fraction_theta_max 1.000
_diffrn_measurement_device_type  'STOE IPDS-2T'
_diffrn_measurement_method       '\w scans'
_diffrn_radiation_type           MoK\a
_diffrn_radiation_wavelength     0.71073
_diffrn_source                   ?
_reflns_Friedel_coverage         0.940
_reflns_Friedel_fraction_full    1.000
_reflns_Friedel_fraction_max     1.000
_reflns_number_gt                16849
_reflns_number_total             21354
_reflns_special_details          
;
 Reflections were merged by SHELXL according to the crystal
 class for the calculation of statistics and refinement.
 
 _reflns_Friedel_fraction is defined as the number of unique
 Friedel pairs measured divided by the number that would be
 possible theoretically, ignoring centric projections and
 systematic absences. Completness statistics refer to single and
 composite reflections containing twin component 1 only.
;
_reflns_threshold_expression     'I > 2\s(I)'
_computing_cell_refinement       ?
_computing_data_collection       ?
_computing_data_reduction        ?
_computing_molecular_graphics    'Olex2 (Dolomanov et al., 2009)'
_computing_publication_material  'Olex2 (Dolomanov et al., 2009)'
_computing_structure_refinement  'ShelXL (Sheldrick, 2015)'
_computing_structure_solution    'XT (Sheldrick, 2015)'
_refine_diff_density_max         0.816
_refine_diff_density_min         -0.209
_refine_diff_density_rms         0.045
_refine_ls_abs_structure_details 
;
 Refined as an inversion twin.
;
_refine_ls_abs_structure_Flack   0.086(13)
_refine_ls_extinction_coef       .
_refine_ls_extinction_method     none
_refine_ls_goodness_of_fit_ref   0.911
_refine_ls_hydrogen_treatment    constr
_refine_ls_matrix_type           full
_refine_ls_number_parameters     1270
_refine_ls_number_reflns         21354
_refine_ls_number_restraints     1546
_refine_ls_R_factor_all          0.0512
_refine_ls_R_factor_gt           0.0368
_refine_ls_restrained_S_all      0.890
_refine_ls_shift/su_max          0.002
_refine_ls_shift/su_mean         0.000
_refine_ls_structure_factor_coef Fsqd
_refine_ls_weighting_details     
'w=1/[\s^2^(Fo^2^)+(0.0442P)^2^] where P=(Fo^2^+2Fc^2^)/3'
_refine_ls_weighting_scheme      calc
_refine_ls_wR_factor_gt          0.0753
_refine_ls_wR_factor_ref         0.0786
_refine_special_details          
;
 Refined as a 2-component inversion twin.
;
_olex2_refinement_description    
;
1. Twinned data refinement
 Scales: 0.914(13)
 0.086(13)
2. Fixed Uiso
 At 1.2 times of:
  All C(H) groups, All C(H,H) groups
 At 1.5 times of:
  All C(H,H,H) groups
3. Restrained distances
 C1_1-C2_1 = C3_1-C4_1 = C5_1-C6_1 = C7_1-C8_1 = C9_1-C10_1 = C11_1-C12_1
 1.45 with sigma of 0.02
 O1_1-C1_1 \\sim O1_1-C12_1 \\sim O2_1-C2_1 \\sim O2_1-C3_1 \\sim O3_1-C4_1
\\sim O3_1-C5_1 \\sim O4_1-
 C6_1 \\sim O4_1-C7_1 \\sim O5_1-C8_1 \\sim O5_1-C9_1 \\sim O6_1-C10_1 \\sim
O6_1-C11_1
 O1_2-C1_2 \\sim O1_2-C12_2 \\sim O2_2-C2_2 \\sim O2_2-C3_2 \\sim O3_2-C4_2
\\sim O3_2-C5_2 \\sim O4_2-
 C6_2 \\sim O4_2-C7_2 \\sim O5_2-C8_2 \\sim O5_2-C9_2 \\sim O6_2-C10_2 \\sim
O6_2-C11_2
 O1_3-C1_3 \\sim O1_3-C12_3 \\sim O2_3-C2_3 \\sim O2_3-C3_3 \\sim O3_3-C4_3
\\sim O3_3-C5_3 \\sim O4_3-
 C6_3 \\sim O4_3-C7_3 \\sim O5_3-C8_3 \\sim O5_3-C9_3 \\sim O6_3-C10_3 \\sim
O6_3-C11_3
 with sigma of 0.02
 C1_1-C2_1 \\sim C3_1-C4_1 \\sim C5_1-C6_1 \\sim C7_1-C8_1 \\sim C9_1-C10_1
\\sim C11_1-C12_1
 C1_2-C2_2 \\sim C3_2-C4_2 \\sim C5_2-C6_2 \\sim C7_2-C8_2 \\sim C9_2-C10_2
\\sim C11_2-C12_2
 C1_3-C2_3 \\sim C3_3-C4_3 \\sim C5_3-C6_3 \\sim C7_3-C8_3 \\sim C9_3-C10_3
\\sim C11_3-C12_3
 with sigma of 0.02
4. Uiso/Uaniso restraints and constraints
O1_1 \\sim O2_1 \\sim O3_1 \\sim O4_1 \\sim O5_1 \\sim O6_1 \\sim C1_1 \\sim
C2_1 \\sim C3_1 \\sim C4_1 \\sim C5_1 \\sim C6_1 \\sim C7_1 \\sim C8_1 \\sim
C9_1 \\sim C10_1 \\sim C11_1 \\sim C12_1 \\sim O1_2 \\sim O2_2 \\sim O3_2 \\sim
O4_2 \\sim O5_2 \\sim O6_2 \\sim C1_2 \\sim C2_2 \\sim C3_2 \\sim C4_2 \\sim
C5_2 \\sim C6_2 \\sim C7_2 \\sim C8_2 \\sim C9_2 \\sim C10_2 \\sim C11_2 \\sim
C12_2 \\sim O1_3 \\sim O2_3 \\sim O3_3 \\sim O4_3 \\sim O5_3 \\sim O6_3 \\sim
C1_3 \\sim C2_3 \\sim C3_3 \\sim C4_3 \\sim C5_3 \\sim C6_3 \\sim C7_3 \\sim
C8_3 \\sim C9_3 \\sim C10_3 \\sim C11_3 \\sim C12_3: within 2A with sigma of
0.04 and sigma for terminal atoms of 0.08
Uanis(O1_1) \\sim Ueq, Uanis(O2_1) \\sim Ueq, Uanis(O3_1) \\sim Ueq,
Uanis(O4_1) \\sim Ueq, Uanis(O5_1) \\sim Ueq, Uanis(O6_1) \\sim Ueq,
Uanis(C1_1) \\sim Ueq, Uanis(C2_1) \\sim Ueq, Uanis(C3_1) \\sim Ueq,
Uanis(C4_1) \\sim Ueq, Uanis(C5_1) \\sim Ueq, Uanis(C6_1) \\sim Ueq,
Uanis(C7_1) \\sim Ueq, Uanis(C8_1) \\sim Ueq, Uanis(C9_1) \\sim Ueq,
Uanis(C10_1) \\sim Ueq, Uanis(C11_1) \\sim Ueq, Uanis(C12_1) \\sim Ueq: with
sigma of 0.1 and sigma for terminal atoms of 0.2
Uanis(C9_3) = Uanis(C10_3)
Uanis(C17B) = Uanis(C9)
5. Rigid body (RIGU) restrains
 O1_1, O2_1, O3_1, O4_1, O5_1, O6_1, C1_1, C2_1, C3_1, C4_1, C5_1, C6_1, C7_1,
 C8_1, C9_1, C10_1, C11_1, C12_1
 O1_2, O2_2, O3_2, O4_2, O5_2, O6_2, C1_2, C2_2, C3_2, C4_2, C5_2, C6_2, C7_2,
 C8_2, C9_2, C10_2, C11_2, C12_2
 O1_3, O2_3, O3_3, O4_3, O5_3, O6_3, C1_3, C2_3, C3_3, C4_3, C5_3, C6_3, C7_3,
 C8_3, C9_3, C10_3, C11_3, C12_3
 with sigma for 1-2 distances of 0.004 and sigma for 1-3 distances of 0.004
6. Others
 Sof(O1)=Sof(O2)=Sof(O3)=Sof(O4)=Sof(O5)=Sof(O6)=Sof(C1)=Sof(H1A)=Sof(H1B)=
 Sof(C2)=Sof(H2A)=Sof(H2B)=Sof(C3)=Sof(H3A)=Sof(H3B)=Sof(C4)=Sof(H4A)=Sof(H4B)=
 Sof(C5)=Sof(H5A)=Sof(H5B)=Sof(C6)=Sof(H6A)=Sof(H6B)=Sof(C7)=Sof(H7A)=Sof(H7B)=
 Sof(C8)=Sof(H8A)=Sof(H8B)=Sof(C9)=Sof(H9A)=Sof(H9B)=Sof(C10)=Sof(H10A)=
 Sof(H10B)=Sof(C11)=Sof(H11A)=Sof(H11B)=Sof(C12)=Sof(H12A)=Sof(H12B)=0.5*(1-
 FVAR(2))
 Sof(O1)=Sof(O2)=Sof(O3)=Sof(O4)=Sof(O5)=Sof(O6)=Sof(C1)=Sof(H1A)=Sof(H1B)=
 Sof(C2)=Sof(H2A)=Sof(H2B)=Sof(C3)=Sof(H3A)=Sof(H3B)=Sof(C4)=Sof(H4A)=Sof(H4B)=
 Sof(C5)=Sof(H5A)=Sof(H5B)=Sof(C6)=Sof(H6A)=Sof(H6B)=Sof(C7)=Sof(H7A)=Sof(H7B)=
 Sof(C8)=Sof(H8A)=Sof(H8B)=Sof(C9)=Sof(H9A)=Sof(H9B)=Sof(C10)=Sof(H10A)=
 Sof(H10B)=Sof(C11)=Sof(H11A)=Sof(H11B)=Sof(C12)=Sof(H12A)=Sof(H12B)=0.5*FVAR(2)
 Fixed Sof: C21B(0.8) H21A(0.8) H21B(0.8) H21C(0.8) C22B(0.8) H22A(0.8)
 H22B(0.8) H22C(0.8) C23B(0.8) H23A(0.8) H23B(0.8) H23C(0.8) C2(0.2) H2A(0.2)
 H2C(0.2) H2D(0.2) C3(0.2) H3A(0.2) H3C(0.2) H3D(0.2) C9(0.2) H9A(0.2) H9C(0.2)
 H9D(0.2) O1(0.5) O2(0.5) O3(0.5) O4(0.5) O5(0.5) O6(0.5) C1(0.5) H1A(0.5)
 H1B(0.5) C2(0.5) H2A(0.5) H2B(0.5) C3(0.5) H3A(0.5) H3B(0.5) C4(0.5) H4A(0.5)
 H4B(0.5) C5(0.5) H5A(0.5) H5B(0.5) C6(0.5) H6A(0.5) H6B(0.5) C7(0.5) H7A(0.5)
 H7B(0.5) C8(0.5) H8A(0.5) H8B(0.5) C9(0.5) H9A(0.5) H9B(0.5) C10(0.5)
 H10A(0.5) H10B(0.5) C11(0.5) H11A(0.5) H11B(0.5) C12(0.5) H12A(0.5) H12B(0.5)
7.a Secondary CH2 refined with riding coordinates:
 C01G(H01A,H01B), C01H(H01C,H01D), C01N(H01E,H01F), C01S(H01G,H01H), C01W(H01I,
 H01J), C01Z(H01K,H01L), C02E(H02A,H02B), C010(H01M,H01N), C011(H01O,H01P),
 C013(H01Q,H01R), C017(H01S,H01T), C022(H02C,H02D), C1(H1A,H1B), C2(H2A,H2B),
 C3(H3A,H3B), C4(H4A,H4B), C5(H5A,H5B), C6(H6A,H6B), C7(H7A,H7B), C8(H8A,H8B),
 C9(H9A,H9B), C10(H10A,H10B), C11(H11A,H11B), C12(H12A,H12B), C1(H1A,H1B),
 C2(H2A,H2B), C3(H3A,H3B), C4(H4A,H4B), C5(H5A,H5B), C6(H6A,H6B), C7(H7A,H7B),
 C8(H8A,H8B), C9(H9A,H9B), C10(H10A,H10B), C11(H11A,H11B), C12(H12A,H12B),
 C1(H1A,H1B), C2(H2A,H2B), C3(H3A,H3B), C4(H4A,H4B), C5(H5A,H5B), C6(H6A,H6B),
 C7(H7A,H7B), C8(H8A,H8B), C9(H9A,H9B), C10(H10A,H10B), C11(H11A,H11B),
 C12(H12A,H12B)
7.b Aromatic/amide H refined with riding coordinates:
 C1A(H1A), C2A(H2AA), C3A(H3AA), C4A(H4A), C7A(H7A), C8A(H8A), C9A(H9AA),
 C10A(H10A), C1B(H1B), C2B(H2B), C3B(H3B), C4B(H4B), C7B(H7B), C8B(H8B),
 C9B(H9B), C11B(H11B)
7.c Idealised Me refined as rotating group:
 C00W(H00A,H00B,H00C), C11A(H11A,H11C,H11D), C12A(H12D,H12E,H12F), C13A(H13D,
 H13E,H13F), C14A(H14D,H14E,H14F), C15A(H15D,H15E,H15F), C16A(H16D,H16E,H16F),
 C17A(H17D,H17E,H17F), C18A(H18D,H18E,H18F), C19A(H19D,H19E,H19F), C20A(H20D,
 H20E,H20F), C21A(H21D,H21E,H21F), C12B(H12A,H12B,H12C), C13B(H13A,H13B,H13C),
 C14B(H14A,H14B,H14C), C15B(H15A,H15B,H15C), C16B(H16A,H16B,H16C), C17B(H17A,
 H17B,H17C), C18B(H18A,H18B,H18C), C19B(H19A,H19B,H19C), C20B(H20A,H20B,H20C),
 C21B(H21A,H21B,H21C), C22B(H22A,H22B,H22C), C23B(H23A,H23B,H23C), C2(H2A,H2C,
 H2D), C3(H3A,H3C,H3D), C9(H9A,H9C,H9D)
;
_atom_sites_solution_hydrogens   geom
_atom_sites_solution_primary     dual
_atom_sites_solution_secondary   ?
loop_
_atom_site_label
_atom_site_type_symbol
_atom_site_fract_x
_atom_site_fract_y
_atom_site_fract_z
_atom_site_U_iso_or_equiv
_atom_site_adp_type
_atom_site_occupancy
_atom_site_site_symmetry_order
_atom_site_calc_flag
_atom_site_refinement_flags_posn
_atom_site_refinement_flags_adp
_atom_site_refinement_flags_occupancy
_atom_site_disorder_assembly
_atom_site_disorder_group
Mn0A Mn 0.86623(2) 0.22137(2) 0.90870(3) 0.02665(11) Uani 1 1 d . . . . .
Si1A Si 0.84494(3) 0.33223(5) 1.06479(6) 0.0344(2) Uani 1 1 d . . . . .
Si2A Si 0.82598(3) 0.37720(5) 0.86577(6) 0.03047(19) Uani 1 1 d . . . . .
Si3A Si 0.89578(3) 0.14542(6) 0.73255(7) 0.0436(3) Uani 1 1 d . . . . .
Si4A Si 0.94294(3) 0.26889(6) 0.81926(10) 0.0520(3) Uani 1 1 d . . . . .
N1A N 0.81660(9) 0.15338(15) 0.91608(19) 0.0357(7) Uani 1 1 d . . . . .
N2A N 0.88705(9) 0.13782(15) 1.00395(18) 0.0350(7) Uani 1 1 d . . . . .
N3A N 0.90353(7) 0.21514(16) 0.80723(17) 0.0329(6) Uani 1 1 d . . . . .
N4A N 0.84431(8) 0.31922(14) 0.94889(18) 0.0284(6) Uani 1 1 d . . . . .
C00W C 0.77376(11) 0.4003(2) 0.8724(3) 0.0446(9) Uani 1 1 d . . . . .
H00A H 0.771760 0.432687 0.925011 0.067 Uiso 1 1 calc GR . . . .
H00B H 0.759189 0.355813 0.880540 0.067 Uiso 1 1 calc GR . . . .
H00C H 0.763125 0.424388 0.814962 0.067 Uiso 1 1 calc GR . . . .
C1A C 0.78048(11) 0.1675(2) 0.8760(3) 0.0433(9) Uani 1 1 d . . . . .
H1A H 0.777138 0.207786 0.835227 0.052 Uiso 1 1 calc R . . . .
C2A C 0.74838(12) 0.1283(2) 0.8897(3) 0.0535(11) Uani 1 1 d . . . . .
H2AA H 0.723683 0.140153 0.858759 0.064 Uiso 1 1 calc R . . . .
C3A C 0.75343(13) 0.0700(2) 0.9512(3) 0.0547(11) Uani 1 1 d . . . . .
H3AA H 0.731955 0.040684 0.961799 0.066 Uiso 1 1 calc R . . . .
C4A C 0.78889(13) 0.0552(2) 0.9958(3) 0.0488(11) Uani 1 1 d . . . . .
H4A H 0.791955 0.016305 1.038876 0.059 Uiso 1 1 calc R . . . .
C5A C 0.82167(12) 0.09732(18) 0.9787(2) 0.0381(8) Uani 1 1 d . . . . .
C6A C 0.85947(12) 0.08659(17) 1.0219(2) 0.0381(9) Uani 1 1 d . . . . .
C7A C 0.87144(15) 0.0267(2) 1.0797(3) 0.0505(11) Uani 1 1 d . . . . .
H7A H 0.852871 -0.007942 1.094006 0.061 Uiso 1 1 calc R . . . .
C8A C 0.90867(16) 0.0184(2) 1.1144(3) 0.0568(12) Uani 1 1 d . . . . .
H8A H 0.916114 -0.021955 1.152885 0.068 Uiso 1 1 calc R . . . .
C9A C 0.93660(15) 0.0690(2) 1.0939(3) 0.0570(11) Uani 1 1 d . . . . .
H9AA H 0.963057 0.063623 1.117124 0.068 Uiso 1 1 calc R . . . .
C10A C 0.92381(12) 0.1272(2) 1.0384(3) 0.0430(9) Uani 1 1 d . . . . .
H10A H 0.942409 0.161732 1.023858 0.052 Uiso 1 1 calc R . . . .
C11A C 0.84399(13) 0.1400(2) 0.6806(3) 0.0541(11) Uani 1 1 d . . . . .
H11A H 0.827376 0.133085 0.729899 0.081 Uiso 1 1 calc GR . . . .
H11C H 0.840762 0.099156 0.637370 0.081 Uiso 1 1 calc GR . . . .
H11D H 0.836806 0.185043 0.647257 0.081 Uiso 1 1 calc GR . . . .
C12A C 0.92459(17) 0.1501(4) 0.6304(3) 0.0828(18) Uani 1 1 d . . . . .
H12D H 0.917096 0.110034 0.587966 0.124 Uiso 1 1 calc GR . . . .
H12E H 0.952195 0.146508 0.652254 0.124 Uiso 1 1 calc GR . . . .
H12F H 0.919444 0.196241 0.598046 0.124 Uiso 1 1 calc GR . . . .
C13A C 0.9079(2) 0.0565(2) 0.7897(3) 0.0773(17) Uani 1 1 d . . . . .
H13D H 0.892281 0.049715 0.840926 0.116 Uiso 1 1 calc GR . . . .
H13E H 0.935385 0.055765 0.813631 0.116 Uiso 1 1 calc GR . . . .
H13F H 0.902502 0.017445 0.744451 0.116 Uiso 1 1 calc GR . . . .
C14A C 0.98976(13) 0.2164(4) 0.8318(5) 0.0920(18) Uani 1 1 d . . . . .
H14D H 0.989733 0.181658 0.882744 0.138 Uiso 1 1 calc GR . . . .
H14E H 1.011485 0.249937 0.844977 0.138 Uiso 1 1 calc GR . . . .
H14F H 0.992373 0.190322 0.774061 0.138 Uiso 1 1 calc GR . . . .
C15A C 0.94643(12) 0.3242(2) 0.9267(4) 0.0662(14) Uani 1 1 d . . . . .
H15D H 0.924096 0.356642 0.924534 0.099 Uiso 1 1 calc GR . . . .
H15E H 0.970232 0.352898 0.931717 0.099 Uiso 1 1 calc GR . . . .
H15F H 0.946811 0.292174 0.980611 0.099 Uiso 1 1 calc GR . . . .
C16A C 0.9448(2) 0.3347(4) 0.7217(5) 0.125(3) Uani 1 1 d . . . . .
H16D H 0.966363 0.368208 0.736728 0.188 Uiso 1 1 calc GR . . . .
H16E H 0.920503 0.361984 0.712600 0.188 Uiso 1 1 calc GR . . . .
H16F H 0.948350 0.308250 0.664866 0.188 Uiso 1 1 calc GR . . . .
C17A C 0.89399(14) 0.3573(3) 1.1232(3) 0.0661(13) Uani 1 1 d . . . . .
H17D H 0.892201 0.368076 1.188629 0.099 Uiso 1 1 calc GR . . . .
H17E H 0.903513 0.400057 1.092977 0.099 Uiso 1 1 calc GR . . . .
H17F H 0.911860 0.316835 1.118551 0.099 Uiso 1 1 calc GR . . . .
C18A C 0.82962(14) 0.2513(2) 1.1273(3) 0.0516(10) Uani 1 1 d . . . . .
H18D H 0.848811 0.212733 1.125126 0.077 Uiso 1 1 calc GR . . . .
H18E H 0.804506 0.234441 1.097823 0.077 Uiso 1 1 calc GR . . . .
H18F H 0.827455 0.264035 1.192006 0.077 Uiso 1 1 calc GR . . . .
C19A C 0.81246(17) 0.4064(3) 1.0992(3) 0.0725(15) Uani 1 1 d . . . . .
H19D H 0.814753 0.409943 1.166934 0.109 Uiso 1 1 calc GR . . . .
H19E H 0.785640 0.395383 1.075429 0.109 Uiso 1 1 calc GR . . . .
H19F H 0.820065 0.452497 1.073288 0.109 Uiso 1 1 calc GR . . . .
C20A C 0.82752(12) 0.3398(2) 0.7462(2) 0.0446(9) Uani 1 1 d . . . . .
H20D H 0.820302 0.377752 0.700380 0.067 Uiso 1 1 calc GR . . . .
H20E H 0.809352 0.299291 0.736130 0.067 Uiso 1 1 calc GR . . . .
H20F H 0.853712 0.322761 0.739681 0.067 Uiso 1 1 calc GR . . . .
C21A C 0.85319(12) 0.4654(2) 0.8679(3) 0.0504(10) Uani 1 1 d . . . . .
H21D H 0.853947 0.487271 0.929529 0.076 Uiso 1 1 calc GR . . . .
H21E H 0.840184 0.498320 0.821558 0.076 Uiso 1 1 calc GR . . . .
H21F H 0.879620 0.456363 0.853812 0.076 Uiso 1 1 calc GR . . . .
Mn1B Mn 0.62361(2) 0.20650(3) 0.58242(3) 0.03127(12) Uani 1 1 d . . . . .
K004 K 0.74603(3) 0.29198(5) 0.24833(6) 0.04344(19) Uani 1 1 d . . . . .
Si1B Si 0.56669(3) 0.25148(5) 0.73727(7) 0.0369(2) Uani 1 1 d . . . . .
Si2B Si 0.60169(3) 0.10472(5) 0.74849(7) 0.0361(2) Uani 1 1 d . . . . .
Si3B Si 0.67709(3) 0.34278(7) 0.64791(7) 0.0440(3) Uani 1 1 d . . . . .
Si4B Si 0.63595(3) 0.34390(6) 0.45567(7) 0.0425(2) Uani 1 1 d . . . . .
O00F O 0.72679(8) 0.16956(13) 0.14592(19) 0.0458(6) Uani 1 1 d . . . . .
O00H O 0.77679(9) 0.16090(17) 0.3114(2) 0.0583(8) Uani 1 1 d . . . . .
O00K O 0.71252(9) 0.42067(14) 0.1851(2) 0.0526(7) Uani 1 1 d . . . . .
O00L O 0.68363(8) 0.29413(15) 0.10492(19) 0.0498(7) Uani 1 1 d . . . . .
O00N O 0.76693(10) 0.4164(2) 0.3431(2) 0.0678(10) Uani 1 1 d . . . . .
O00P O 0.81094(9) 0.2881(2) 0.38466(19) 0.0673(9) Uani 1 1 d . . . . .
N1B N 0.59157(12) 0.1404(2) 0.4800(2) 0.0580(9) Uani 1 1 d . . . . .
N2B N 0.66656(11) 0.1399(2) 0.5258(2) 0.0547(10) Uani 1 1 d . . . . .
N3B N 0.59474(8) 0.18693(15) 0.69771(18) 0.0306(6) Uani 1 1 d . . . . .
N4B N 0.64422(8) 0.30967(16) 0.56424(19) 0.0349(6) Uani 1 1 d . . . . .
C1B C 0.55269(18) 0.1373(3) 0.4654(4) 0.0815(16) Uani 1 1 d . . . . .
H1B H 0.538801 0.172075 0.496533 0.098 Uiso 1 1 calc R . . . .
C01G C 0.68614(15) 0.2377(3) 0.0397(3) 0.0621(12) Uani 1 1 d . . . . .
H01A H 0.708547 0.245784 0.004823 0.074 Uiso 1 1 calc R . . . .
H01B H 0.662429 0.236465 -0.004829 0.074 Uiso 1 1 calc R . . . .
C01H C 0.77279(15) 0.1039(2) 0.2440(4) 0.0640(13) Uani 1 1 d . . . . .
H01C H 0.778254 0.056684 0.274955 0.077 Uiso 1 1 calc R . . . .
H01D H 0.791534 0.111062 0.198516 0.077 Uiso 1 1 calc R . . . .
C01N C 0.67534(13) 0.4171(2) 0.1347(3) 0.0584(12) Uani 1 1 d . . . . .
H01E H 0.668112 0.464803 0.106937 0.070 Uiso 1 1 calc R . . . .
H01F H 0.655940 0.403420 0.176367 0.070 Uiso 1 1 calc R . . . .
C01S C 0.81311(16) 0.1613(4) 0.3658(4) 0.0848(19) Uani 1 1 d . . . . .
H01G H 0.833897 0.166926 0.325246 0.102 Uiso 1 1 calc R . . . .
H01H H 0.817108 0.114756 0.399288 0.102 Uiso 1 1 calc R . . . .
C01W C 0.80533(18) 0.4155(4) 0.3867(4) 0.085(2) Uani 1 1 d . . . . .
H01I H 0.810032 0.459198 0.425799 0.102 Uiso 1 1 calc R . . . .
H01J H 0.823471 0.416432 0.339021 0.102 Uiso 1 1 calc R . . . .
C01Z C 0.67658(15) 0.3621(3) 0.0613(3) 0.0593(12) Uani 1 1 d . . . . .
H01K H 0.651686 0.361139 0.020929 0.071 Uiso 1 1 calc R . . . .
H01L H 0.697392 0.373707 0.022647 0.071 Uiso 1 1 calc R . . . .
C2B C 0.5316(2) 0.0891(4) 0.4103(5) 0.114(3) Uani 1 1 d . . . . .
H2B H 0.504169 0.090561 0.402435 0.137 Uiso 1 1 calc R . . . .
C02E C 0.81250(16) 0.3502(4) 0.4446(3) 0.088(2) Uani 1 1 d . . . . .
H02A H 0.838207 0.353403 0.481233 0.106 Uiso 1 1 calc R . . . .
H02B H 0.792694 0.346038 0.488018 0.106 Uiso 1 1 calc R . . . .
C3B C 0.5521(4) 0.0373(4) 0.3659(5) 0.128(3) Uani 1 1 d . . . . .
H3B H 0.538514 0.002872 0.325921 0.153 Uiso 1 1 calc R . . . .
C4B C 0.5908(3) 0.0360(3) 0.3792(4) 0.104(3) Uani 1 1 d . . . . .
H4B H 0.604684 0.000026 0.349991 0.125 Uiso 1 1 calc R . . . .
C5B C 0.6110(2) 0.0888(2) 0.4375(3) 0.0699(16) Uani 1 1 d . . . . .
C6B C 0.6519(2) 0.0910(2) 0.4595(3) 0.0710(17) Uani 1 1 d . . . . .
C7B C 0.6783(3) 0.0466(3) 0.4143(4) 0.101(3) Uani 1 1 d . . . . .
H7B H 0.668250 0.013586 0.367469 0.121 Uiso 1 1 calc R . . . .
C8B C 0.7163(3) 0.0511(4) 0.4367(6) 0.126(4) Uani 1 1 d . . . . .
H8B H 0.733194 0.020337 0.407796 0.152 Uiso 1 1 calc R . . . .
C9B C 0.7313(2) 0.1020(4) 0.5038(6) 0.109(3) Uani 1 1 d . . . . .
H9B H 0.758368 0.106640 0.519805 0.131 Uiso 1 1 calc R . . . .
C010 C 0.73325(14) 0.1042(2) 0.1964(3) 0.0564(11) Uani 1 1 d . . . . .
H01M H 0.729617 0.062438 0.153632 0.068 Uiso 1 1 calc R . . . .
H01N H 0.714456 0.099959 0.242279 0.068 Uiso 1 1 calc R . . . .
C011 C 0.71572(15) 0.4777(2) 0.2505(4) 0.0677(15) Uani 1 1 d . . . . .
H01O H 0.698503 0.468472 0.298976 0.081 Uiso 1 1 calc R . . . .
H01P H 0.707982 0.524045 0.219644 0.081 Uiso 1 1 calc R . . . .
C11B C 0.70539(14) 0.1460(3) 0.5467(4) 0.0725(16) Uani 1 1 d . . . . .
H11B H 0.715398 0.180659 0.591420 0.087 Uiso 1 1 calc R . . . .
C12B C 0.66912(14) 0.3030(3) 0.3760(3) 0.0578(12) Uani 1 1 d . . . . .
H12A H 0.665468 0.250421 0.373608 0.087 Uiso 1 1 calc GR . . . .
H12B H 0.695991 0.314043 0.399346 0.087 Uiso 1 1 calc GR . . . .
H12C H 0.663146 0.323336 0.313745 0.087 Uiso 1 1 calc GR . . . .
C013 C 0.69065(14) 0.1691(3) 0.0906(3) 0.0579(11) Uani 1 1 d . . . . .
H01Q H 0.669550 0.163354 0.130237 0.069 Uiso 1 1 calc R . . . .
H01R H 0.689438 0.128053 0.046519 0.069 Uiso 1 1 calc R . . . .
C13B C 0.58514(13) 0.3274(3) 0.4020(3) 0.0681(14) Uani 1 1 d . . . . .
H13A H 0.581002 0.351509 0.341633 0.102 Uiso 1 1 calc GR . . . .
H13B H 0.566995 0.346759 0.442588 0.102 Uiso 1 1 calc GR . . . .
H13C H 0.580874 0.275218 0.393792 0.102 Uiso 1 1 calc GR . . . .
C14B C 0.64270(17) 0.4449(3) 0.4508(4) 0.0697(14) Uani 1 1 d . . . . .
H14A H 0.636005 0.461736 0.387036 0.105 Uiso 1 1 calc GR . . . .
H14B H 0.669707 0.456920 0.471412 0.105 Uiso 1 1 calc GR . . . .
H14C H 0.625899 0.468523 0.491397 0.105 Uiso 1 1 calc GR . . . .
C15B C 0.72494(13) 0.3643(3) 0.6058(3) 0.0704(15) Uani 1 1 d . . . . .
H15A H 0.742468 0.384605 0.656863 0.106 Uiso 1 1 calc GR . . . .
H15B H 0.721078 0.399592 0.555241 0.106 Uiso 1 1 calc GR . . . .
H15C H 0.736176 0.319918 0.583422 0.106 Uiso 1 1 calc GR . . . .
C16B C 0.66074(17) 0.4283(3) 0.7017(4) 0.0757(15) Uani 1 1 d . . . . .
H16A H 0.635130 0.420736 0.721828 0.114 Uiso 1 1 calc GR . . . .
H16B H 0.659410 0.467558 0.656072 0.114 Uiso 1 1 calc GR . . . .
H16C H 0.679141 0.441250 0.755296 0.114 Uiso 1 1 calc GR . . . .
C017 C 0.75646(17) 0.4817(3) 0.2929(4) 0.0749(17) Uani 1 1 d . . . . .
H01S H 0.773626 0.488686 0.243814 0.090 Uiso 1 1 calc R . . . .
H01T H 0.759759 0.523700 0.335436 0.090 Uiso 1 1 calc R . . . .
C17B C 0.68801(13) 0.2762(3) 0.7449(3) 0.0649(13) Uani 1 1 d . . . . .
H17A H 0.702140 0.234945 0.723026 0.097 Uiso 1 1 calc GR . . . .
H17B H 0.663786 0.259284 0.765684 0.097 Uiso 1 1 calc GR . . . .
H17C H 0.703816 0.299721 0.796516 0.097 Uiso 1 1 calc GR . . . .
C18B C 0.55203(15) 0.3220(3) 0.6497(3) 0.0656(14) Uani 1 1 d . . . . .
H18A H 0.536925 0.359367 0.677185 0.098 Uiso 1 1 calc GR . . . .
H18B H 0.536287 0.300051 0.596747 0.098 Uiso 1 1 calc GR . . . .
H18C H 0.575111 0.344010 0.628690 0.098 Uiso 1 1 calc GR . . . .
C19B C 0.52049(15) 0.2163(3) 0.7760(4) 0.0861(18) Uani 1 1 d . . . . .
H19A H 0.505081 0.256960 0.794760 0.129 Uiso 1 1 calc GR . . . .
H19B H 0.526507 0.183395 0.828548 0.129 Uiso 1 1 calc GR . . . .
H19C H 0.505813 0.190206 0.724774 0.129 Uiso 1 1 calc GR . . . .
C20B C 0.59052(18) 0.3002(3) 0.8421(3) 0.0779(16) Uani 1 1 d . . . . .
H20A H 0.615855 0.318183 0.829435 0.117 Uiso 1 1 calc GR . . . .
H20B H 0.593785 0.266851 0.894867 0.117 Uiso 1 1 calc GR . . . .
H20C H 0.574335 0.341107 0.856788 0.117 Uiso 1 1 calc GR . . . .
C21B C 0.6148(2) 0.1092(3) 0.8789(4) 0.0680(17) Uani 0.8 1 d . . . A 1
H21A H 0.637574 0.140123 0.893187 0.102 Uiso 0.8 1 calc GR . . A 1
H21B H 0.620529 0.060408 0.903101 0.102 Uiso 0.8 1 calc GR . . A 1
H21C H 0.593082 0.129471 0.907731 0.102 Uiso 0.8 1 calc GR . . A 1
C022 C 0.81484(16) 0.2219(4) 0.4333(4) 0.096(2) Uani 1 1 d . . . . .
H02C H 0.793802 0.216879 0.473299 0.115 Uiso 1 1 calc R . . . .
H02D H 0.839818 0.220838 0.473361 0.115 Uiso 1 1 calc R . . . .
C22B C 0.6415(2) 0.0525(4) 0.7065(5) 0.083(2) Uani 0.8 1 d . . . A 1
H22A H 0.635802 0.044192 0.639760 0.125 Uiso 0.8 1 calc GR . . A 1
H22B H 0.644111 0.005850 0.738796 0.125 Uiso 0.8 1 calc GR . . A 1
H22C H 0.665671 0.079741 0.718829 0.125 Uiso 0.8 1 calc GR . . A 1
C23B C 0.5586(2) 0.0426(3) 0.7322(5) 0.078(2) Uani 0.8 1 d . . . A 1
H23A H 0.536321 0.066629 0.754394 0.117 Uiso 0.8 1 calc GR . . A 1
H23B H 0.564413 -0.002057 0.767407 0.117 Uiso 0.8 1 calc GR . . A 1
H23C H 0.552647 0.030995 0.666311 0.117 Uiso 0.8 1 calc GR . . A 1
K003 K 0.500000 0.69606(6) 0.500000 0.0422(3) Uani 1 2 d S T P . .
K005 K 0.500000 0.22068(7) 0.000000 0.0487(3) Uani 1 2 d S T P . .
C2 C 0.5978(8) 0.0323(10) 0.6514(18) 0.069(7) Uani 0.2 1 d . . . A 2
H2A H 0.571392 0.031309 0.620135 0.104 Uiso 0.2 1 calc GR . . A 2
H2C H 0.604396 -0.015326 0.678510 0.104 Uiso 0.2 1 calc GR . . A 2
H2D H 0.615800 0.044254 0.606426 0.104 Uiso 0.2 1 calc GR . . A 2
C3 C 0.6540(8) 0.1017(14) 0.7956(17) 0.074(8) Uani 0.2 1 d . . . A 2
H3A H 0.669979 0.108202 0.744877 0.110 Uiso 0.2 1 calc GR . . A 2
H3C H 0.659895 0.054731 0.825381 0.110 Uiso 0.2 1 calc GR . . A 2
H3D H 0.659565 0.140459 0.841192 0.110 Uiso 0.2 1 calc GR . . A 2
C9 C 0.5691(7) 0.0805(16) 0.8279(15) 0.0649(13) Uani 0.2 1 d . . . A 2
H9A H 0.574153 0.110269 0.883827 0.097 Uiso 0.2 1 calc GR . . A 2
H9C H 0.572596 0.029318 0.844329 0.097 Uiso 0.2 1 calc GR . . A 2
H9D H 0.542583 0.088622 0.799570 0.097 Uiso 0.2 1 calc GR . . A 2
O1_1 O 0.5675(3) 0.1721(4) 0.1079(5) 0.058(2) Uani 0.5 1 d D U . B -1
O2_1 O 0.5125(2) 0.0743(4) 0.0372(5) 0.0603(16) Uani 0.5 1 d D U . B -1
O3_1 O 0.45514(19) 0.1193(5) -0.0957(5) 0.0672(18) Uani 0.5 1 d D U . B -1
O4_1 O 0.4339(3) 0.2656(6) -0.1027(5) 0.082(2) Uani 0.5 1 d D U . B -1
O5_1 O 0.4898(3) 0.3673(4) -0.0275(5) 0.085(3) Uani 0.5 1 d D U . B -1
O6_1 O 0.5503(2) 0.3191(5) 0.1044(5) 0.0612(18) Uani 0.5 1 d D U . B -1
C1_1 C 0.5647(5) 0.1026(6) 0.1479(8) 0.076(3) Uani 0.5 1 d D U . B -1
H1A_1 H 0.547187 0.104237 0.197042 0.092 Uiso 0.5 1 calc R . . B -1
H1B_1 H 0.590423 0.086061 0.175844 0.092 Uiso 0.5 1 calc R . . B -1
C2_1 C 0.5495(5) 0.0539(12) 0.0748(14) 0.077(4) Uani 0.5 1 d D U . B -1
H2A_1 H 0.566918 0.053871 0.025434 0.092 Uiso 0.5 1 calc R . . B -1
H2B_1 H 0.548788 0.004130 0.099775 0.092 Uiso 0.5 1 calc R . . B -1
C3_1 C 0.4967(4) 0.0282(6) -0.0331(7) 0.083(3) Uani 0.5 1 d D U . B -1
H3A_1 H 0.497174 -0.022080 -0.009378 0.100 Uiso 0.5 1 calc R . . B -1
H3B_1 H 0.512815 0.029912 -0.084961 0.100 Uiso 0.5 1 calc R . . B -1
C4_1 C 0.4578(6) 0.0474(9) -0.0667(19) 0.095(6) Uani 0.5 1 d D U . B -1
H4A_1 H 0.448483 0.015483 -0.119286 0.114 Uiso 0.5 1 calc R . . B -1
H4B_1 H 0.441035 0.039798 -0.017031 0.114 Uiso 0.5 1 calc R . . B -1
C5_1 C 0.4184(3) 0.1444(11) -0.1323(9) 0.085(4) Uani 0.5 1 d D U . B -1
H5A_1 H 0.401049 0.141461 -0.083038 0.102 Uiso 0.5 1 calc R . . B -1
H5B_1 H 0.408096 0.111131 -0.182557 0.102 Uiso 0.5 1 calc R . . B -1
C6_1 C 0.4169(7) 0.2172(11) -0.1685(14) 0.118(7) Uani 0.5 1 d D U . B -1
H6A_1 H 0.430554 0.219237 -0.224559 0.141 Uiso 0.5 1 calc R . . B -1
H6B_1 H 0.389638 0.231219 -0.186420 0.141 Uiso 0.5 1 calc R . . B -1
C7_1 C 0.4350(5) 0.3385(9) -0.1331(12) 0.111(5) Uani 0.5 1 d D U . B -1
H7A_1 H 0.408177 0.354444 -0.152990 0.134 Uiso 0.5 1 calc R . . B -1
H7B_1 H 0.449351 0.340353 -0.187949 0.134 Uiso 0.5 1 calc R . . B -1
C8_1 C 0.4526(6) 0.3895(15) -0.0643(19) 0.143(8) Uani 0.5 1 d D U . B -1
H8A_1 H 0.454158 0.437709 -0.093303 0.172 Uiso 0.5 1 calc R . . B -1
H8B_1 H 0.436067 0.393905 -0.013488 0.172 Uiso 0.5 1 calc R . . B -1
C9_1 C 0.5094(4) 0.4142(6) 0.0409(8) 0.101(4) Uani 0.5 1 d D U . B -1
H9A_1 H 0.495903 0.414199 0.097301 0.121 Uiso 0.5 1 calc R . . B -1
H9B_1 H 0.509487 0.464354 0.016780 0.121 Uiso 0.5 1 calc R . . B -1
C10_1 C 0.5489(4) 0.3884(7) 0.0631(11) 0.082(4) Uani 0.5 1 d D U . B -1
H10A_1 H 0.561641 0.386502 0.005594 0.099 Uiso 0.5 1 calc R . . B -1
H10B_1 H 0.563395 0.423127 0.105831 0.099 Uiso 0.5 1 calc R . . B -1
C11_1 C 0.5874(3) 0.2912(8) 0.1329(9) 0.080(3) Uani 0.5 1 d D U . B -1
H11A_1 H 0.601537 0.324427 0.178205 0.095 Uiso 0.5 1 calc R . . B -1
H11B_1 H 0.602147 0.286931 0.078814 0.095 Uiso 0.5 1 calc R . . B -1
C12_1 C 0.5839(5) 0.2196(8) 0.1753(8) 0.066(4) Uani 0.5 1 d D U . B -1
H12A_1 H 0.609726 0.201915 0.201171 0.080 Uiso 0.5 1 calc R . . B -1
H12B_1 H 0.567465 0.222973 0.226435 0.080 Uiso 0.5 1 calc R . . B -1
O1_2 O 0.4742(12) 0.566(2) 0.424(4) 0.045(5) Uani 0.335(4) 1 d D U . C -2
O2_2 O 0.4319(10) 0.6956(15) 0.374(2) 0.066(7) Uani 0.335(4) 1 d D U . C -2
O3_2 O 0.4675(7) 0.8283(15) 0.4287(16) 0.041(4) Uani 0.335(4) 1 d D U . C -2
O4_2 O 0.5311(11) 0.823(2) 0.563(2) 0.080(9) Uani 0.335(4) 1 d D U . C -2
O5_2 O 0.5693(9) 0.6938(19) 0.612(2) 0.061(7) Uani 0.335(4) 1 d D U . C -2
O6_2 O 0.5322(13) 0.570(2) 0.572(4) 0.060(10) Uani 0.335(4) 1 d D U . C -2
C1_2 C 0.4353(13) 0.5620(17) 0.384(3) 0.055(7) Uani 0.335(4) 1 d D U . C -2
H1A_2 H 0.417797 0.559549 0.433222 0.066 Uiso 0.335(4) 1 calc R . . C -2
H1B_2 H 0.431054 0.518449 0.344572 0.066 Uiso 0.335(4) 1 calc R . . C -2
C2_2 C 0.4277(14) 0.6278(14) 0.329(3) 0.057(8) Uani 0.335(4) 1 d D U . C -2
H2A_2 H 0.445139 0.627410 0.279323 0.068 Uiso 0.335(4) 1 calc R . . C -2
H2B_2 H 0.400928 0.624763 0.297484 0.068 Uiso 0.335(4) 1 calc R . . C -2
C3_2 C 0.4220(19) 0.7640(16) 0.338(3) 0.063(9) Uani 0.335(4) 1 d D U . C -2
H3A_2 H 0.394348 0.762977 0.312730 0.075 Uiso 0.335(4) 1 calc R . . C -2
H3B_2 H 0.437091 0.773024 0.285497 0.075 Uiso 0.335(4) 1 calc R . . C -2
C4_2 C 0.4278(8) 0.825(2) 0.402(3) 0.055(6) Uani 0.335(4) 1 d D U . C -2
H4A_2 H 0.418597 0.870284 0.370349 0.065 Uiso 0.335(4) 1 calc R . . C -2
H4B_2 H 0.413600 0.817210 0.455949 0.065 Uiso 0.335(4) 1 calc R . . C -2
C5_2 C 0.4756(11) 0.8898(18) 0.484(2) 0.052(6) Uani 0.335(4) 1 d D U . C -2
H5A_2 H 0.459596 0.890322 0.535733 0.063 Uiso 0.335(4) 1 calc R . . C -2
H5B_2 H 0.470182 0.934287 0.446513 0.063 Uiso 0.335(4) 1 calc R . . C -2
C6_2 C 0.5162(12) 0.886(2) 0.519(4) 0.078(10) Uani 0.335(4) 1 d D U . C -2
H6A_2 H 0.531170 0.895441 0.465696 0.094 Uiso 0.335(4) 1 calc R . . C -2
H6B_2 H 0.521731 0.926725 0.562645 0.094 Uiso 0.335(4) 1 calc R . . C -2
C7_2 C 0.5683(12) 0.815(3) 0.612(4) 0.086(12) Uani 0.335(4) 1 d D U . C -2
H7A_2 H 0.572636 0.858545 0.651896 0.103 Uiso 0.335(4) 1 calc R . . C -2
H7B_2 H 0.586981 0.818184 0.565636 0.103 Uiso 0.335(4) 1 calc R . . C -2
C8_2 C 0.5795(19) 0.753(2) 0.670(3) 0.071(9) Uani 0.335(4) 1 d D U . C -2
H8A_2 H 0.607634 0.753282 0.690534 0.086 Uiso 0.335(4) 1 calc R . . C -2
H8B_2 H 0.565354 0.752059 0.725507 0.086 Uiso 0.335(4) 1 calc R . . C -2
C9_2 C 0.5746(12) 0.6403(18) 0.682(2) 0.064(8) Uani 0.335(4) 1 d D U . C -2
H9A_2 H 0.555784 0.646128 0.727717 0.077 Uiso 0.335(4) 1 calc R . . C -2
H9B_2 H 0.601113 0.641777 0.714753 0.077 Uiso 0.335(4) 1 calc R . . C -2
C10_2 C 0.5678(16) 0.574(2) 0.630(3) 0.072(8) Uani 0.335(4) 1 d D U . C -2
H10A_2 H 0.588983 0.567302 0.590482 0.086 Uiso 0.335(4) 1 calc R . . C -2
H10B_2 H 0.569046 0.532748 0.673823 0.086 Uiso 0.335(4) 1 calc R . . C -2
C11_2 C 0.5254(10) 0.5054(17) 0.523(3) 0.055(5) Uani 0.335(4) 1 d D U . C -2
H11A_2 H 0.529360 0.463734 0.565532 0.065 Uiso 0.335(4) 1 calc R . . C -2
H11B_2 H 0.543912 0.501070 0.476097 0.065 Uiso 0.335(4) 1 calc R . . C -2
C12_2 C 0.4861(10) 0.505(2) 0.477(4) 0.079(11) Uani 0.335(4) 1 d D U . C -2
H12A_2 H 0.483214 0.461744 0.435660 0.095 Uiso 0.335(4) 1 calc R . . C -2
H12B_2 H 0.468310 0.498206 0.524521 0.095 Uiso 0.335(4) 1 calc R . . C -2
O1_3 O 0.4549(7) 0.6115(15) 0.3760(17) 0.049(5) Uani 0.165(4) 1 d D U . C -3
O2_3 O 0.5052(10) 0.5453(12) 0.5166(16) 0.050(6) Uani 0.165(4) 1 d D U . C -3
O3_3 O 0.5634(10) 0.6277(14) 0.6111(15) 0.053(6) Uani 0.165(4) 1 d D U . C -3
O4_3 O 0.5557(8) 0.7789(16) 0.611(3) 0.048(8) Uani 0.165(4) 1 d D U . C -3
O5_3 O 0.5008(8) 0.8445(11) 0.4817(11) 0.044(6) Uani 0.165(4) 1 d D U . C -3
O6_3 O 0.4406(11) 0.7586(14) 0.398(2) 0.044(7) Uani 0.165(4) 1 d D U . C -3
C1_3 C 0.4544(12) 0.5381(17) 0.400(4) 0.065(9) Uani 0.165(4) 1 d D U . C -3
H1A_3 H 0.443084 0.509143 0.346279 0.078 Uiso 0.165(4) 1 calc R . . C -3
H1B_3 H 0.438374 0.530929 0.451380 0.078 Uiso 0.165(4) 1 calc R . . C -3
C2_3 C 0.4940(11) 0.515(2) 0.4285(17) 0.061(8) Uani 0.165(4) 1 d D U . C -3
H2A_3 H 0.495462 0.461541 0.431552 0.073 Uiso 0.165(4) 1 calc R . . C -3
H2B_3 H 0.511292 0.532196 0.383482 0.073 Uiso 0.165(4) 1 calc R . . C -3
C3_3 C 0.5413(9) 0.523(3) 0.561(2) 0.059(8) Uani 0.165(4) 1 d D U . C -3
H3A_3 H 0.561476 0.531604 0.519348 0.071 Uiso 0.165(4) 1 calc R . . C -3
H3B_3 H 0.540597 0.470351 0.573762 0.071 Uiso 0.165(4) 1 calc R . . C -3
C4_3 C 0.5514(11) 0.5620(18) 0.648(2) 0.055(8) Uani 0.165(4) 1 d D U . C -3
H4A_3 H 0.528763 0.568664 0.682474 0.066 Uiso 0.165(4) 1 calc R . . C -3
H4B_3 H 0.572490 0.537983 0.687902 0.066 Uiso 0.165(4) 1 calc R . . C -3
C5_3 C 0.5824(11) 0.672(2) 0.680(2) 0.050(8) Uani 0.165(4) 1 d D U . C -3
H5A_3 H 0.607080 0.649099 0.705539 0.060 Uiso 0.165(4) 1 calc R . . C -3
H5B_3 H 0.566166 0.677246 0.731593 0.060 Uiso 0.165(4) 1 calc R . . C -3
C6_3 C 0.5901(9) 0.743(2) 0.643(3) 0.051(8) Uani 0.165(4) 1 d D U . C -3
H6A_3 H 0.604584 0.772621 0.692365 0.061 Uiso 0.165(4) 1 calc R . . C -3
H6B_3 H 0.606278 0.737641 0.592053 0.061 Uiso 0.165(4) 1 calc R . . C -3
C7_3 C 0.5610(9) 0.8480(16) 0.571(2) 0.040(6) Uani 0.165(4) 1 d D U . C -3
H7A_3 H 0.572964 0.842507 0.512756 0.048 Uiso 0.165(4) 1 calc R . . C -3
H7B_3 H 0.578375 0.877807 0.614332 0.048 Uiso 0.165(4) 1 calc R . . C -3
C8_3 C 0.5233(9) 0.884(2) 0.552(2) 0.043(8) Uani 0.165(4) 1 d D U . C -3
H8A_3 H 0.510194 0.884965 0.608740 0.052 Uiso 0.165(4) 1 calc R . . C -3
H8B_3 H 0.526848 0.934135 0.531278 0.052 Uiso 0.165(4) 1 calc R . . C -3
C9_3 C 0.4628(9) 0.870(2) 0.457(3) 0.052(7) Uani 0.165(4) 1 d D U . C -3
H9A_3 H 0.463644 0.922681 0.444138 0.062 Uiso 0.165(4) 1 calc R . . C -3
H9B_3 H 0.447654 0.863259 0.510372 0.062 Uiso 0.165(4) 1 calc R . . C -3
C10_3 C 0.4436(14) 0.8326(16) 0.376(3) 0.052(7) Uani 0.165(4) 1 d D U . C -3
H10A_3 H 0.417577 0.853245 0.359310 0.062 Uiso 0.165(4) 1 calc R . . C -3
H10B_3 H 0.458733 0.838648 0.323181 0.062 Uiso 0.165(4) 1 calc R . . C -3
C11_3 C 0.4235(13) 0.714(2) 0.327(2) 0.048(7) Uani 0.165(4) 1 d D U . C -3
H11A_3 H 0.440131 0.713133 0.275996 0.057 Uiso 0.165(4) 1 calc R . . C -3
H11B_3 H 0.398349 0.734683 0.302209 0.057 Uiso 0.165(4) 1 calc R . . C -3
C12_3 C 0.4172(9) 0.639(2) 0.354(3) 0.050(9) Uani 0.165(4) 1 d D U . C -3
H12A_3 H 0.402556 0.637167 0.408628 0.060 Uiso 0.165(4) 1 calc R . . C -3
H12B_3 H 0.402929 0.611536 0.302680 0.060 Uiso 0.165(4) 1 calc R . . C -3

loop_
_atom_site_aniso_label
_atom_site_aniso_U_11
_atom_site_aniso_U_22
_atom_site_aniso_U_33
_atom_site_aniso_U_23
_atom_site_aniso_U_13
_atom_site_aniso_U_12
Mn0A 0.0340(3) 0.0198(2) 0.0277(2) 0.00019(19) 0.00988(19) -0.0007(2)
Si1A 0.0430(5) 0.0285(5) 0.0313(5) -0.0065(4) 0.0028(4) 0.0034(4)
Si2A 0.0282(5) 0.0250(4) 0.0372(5) -0.0004(4) -0.0008(4) 0.0012(4)
Si3A 0.0644(7) 0.0412(6) 0.0268(5) 0.0004(4) 0.0123(5) 0.0179(5)
Si4A 0.0343(6) 0.0478(7) 0.0776(8) 0.0153(6) 0.0228(6) 0.0020(5)
N1A 0.0465(18) 0.0247(14) 0.0380(15) -0.0041(12) 0.0142(13) -0.0062(13)
N2A 0.0513(19) 0.0246(14) 0.0304(14) 0.0028(11) 0.0107(13) 0.0024(13)
N3A 0.0366(14) 0.0328(15) 0.0312(13) 0.0075(13) 0.0125(11) 0.0051(13)
N4A 0.0315(14) 0.0203(12) 0.0333(13) -0.0024(11) 0.0031(11) 0.0006(11)
C00W 0.034(2) 0.041(2) 0.056(2) -0.0104(18) -0.0045(17) 0.0061(16)
C1A 0.044(2) 0.037(2) 0.051(2) -0.0083(16) 0.0145(18) -0.0049(17)
C2A 0.043(2) 0.053(3) 0.068(3) -0.012(2) 0.017(2) -0.0115(19)
C3A 0.056(3) 0.044(2) 0.069(3) -0.012(2) 0.026(2) -0.017(2)
C4A 0.071(3) 0.0295(19) 0.051(2) -0.0054(16) 0.029(2) -0.0126(19)
C5A 0.056(2) 0.0243(16) 0.0380(18) -0.0074(14) 0.0212(17) -0.0092(16)
C6A 0.066(3) 0.0204(16) 0.0317(17) -0.0019(13) 0.0212(17) -0.0031(16)
C7A 0.086(3) 0.0294(19) 0.0362(19) 0.0027(15) 0.009(2) -0.005(2)
C8A 0.099(4) 0.031(2) 0.039(2) 0.0054(16) 0.002(2) 0.004(2)
C9A 0.074(3) 0.046(2) 0.049(2) -0.0001(19) -0.004(2) 0.013(2)
C10A 0.055(2) 0.036(2) 0.0384(19) 0.0009(15) 0.0065(18) 0.0048(17)
C11A 0.078(3) 0.047(2) 0.037(2) -0.0096(18) 0.007(2) 0.000(2)
C12A 0.088(4) 0.121(5) 0.044(2) -0.003(3) 0.029(3) 0.030(4)
C13A 0.140(5) 0.038(2) 0.049(2) -0.010(2) -0.014(3) 0.026(3)
C14A 0.043(3) 0.110(5) 0.126(5) -0.021(4) 0.021(3) 0.017(3)
C15A 0.037(2) 0.042(2) 0.119(4) -0.013(3) 0.006(2) -0.0104(19)
C16A 0.109(5) 0.137(7) 0.136(6) 0.080(5) 0.041(5) -0.033(5)
C17A 0.068(3) 0.085(4) 0.041(2) -0.001(2) -0.009(2) -0.024(3)
C18A 0.069(3) 0.055(2) 0.0336(19) -0.0040(18) 0.0159(19) -0.004(2)
C19A 0.104(4) 0.068(3) 0.045(2) -0.015(2) 0.004(3) 0.038(3)
C20A 0.049(2) 0.045(2) 0.0385(19) 0.0034(17) 0.0022(17) 0.0116(19)
C21A 0.045(2) 0.032(2) 0.072(3) 0.0107(19) 0.000(2) -0.0029(17)
Mn1B 0.0358(3) 0.0334(3) 0.0258(2) 0.0004(2) 0.0085(2) 0.0044(2)
K004 0.0472(5) 0.0375(4) 0.0450(4) -0.0064(3) 0.0023(4) 0.0030(4)
Si1B 0.0434(6) 0.0291(5) 0.0418(5) 0.0009(4) 0.0200(4) 0.0068(4)
Si2B 0.0409(6) 0.0333(5) 0.0351(5) 0.0048(4) 0.0081(4) 0.0103(4)
Si3B 0.0361(5) 0.0601(7) 0.0361(5) 0.0010(5) 0.0051(4) -0.0137(5)
Si4B 0.0458(6) 0.0489(6) 0.0332(5) 0.0131(5) 0.0069(4) 0.0053(5)
O00F 0.0530(17) 0.0322(13) 0.0534(15) -0.0011(12) 0.0108(13) -0.0039(12)
O00H 0.0499(18) 0.066(2) 0.0589(17) 0.0232(16) 0.0065(14) 0.0065(15)
O00K 0.0593(19) 0.0301(14) 0.0724(19) -0.0024(13) 0.0250(16) -0.0002(12)
O00L 0.0559(17) 0.0425(15) 0.0501(15) 0.0078(13) 0.0017(13) 0.0034(13)
O00N 0.071(2) 0.074(2) 0.0608(19) -0.0284(17) 0.0196(17) -0.0283(18)
O00P 0.064(2) 0.105(3) 0.0330(15) 0.0011(17) 0.0036(13) -0.0203(19)
N1B 0.079(3) 0.052(2) 0.0405(18) -0.0145(16) 0.0000(18) 0.004(2)
N2B 0.067(2) 0.047(2) 0.056(2) 0.0197(17) 0.0345(18) 0.0201(18)
N3B 0.0345(15) 0.0290(14) 0.0299(13) 0.0012(11) 0.0106(12) 0.0052(11)
N4B 0.0312(15) 0.0404(17) 0.0335(14) 0.0048(12) 0.0051(12) -0.0019(13)
C1B 0.090(4) 0.083(4) 0.064(3) -0.023(3) -0.020(3) -0.012(3)
C01G 0.068(3) 0.061(3) 0.053(2) -0.012(2) -0.011(2) 0.001(2)
C01H 0.080(4) 0.036(2) 0.080(3) 0.020(2) 0.028(3) 0.014(2)
C01N 0.050(3) 0.043(2) 0.084(3) 0.030(2) 0.015(2) 0.0098(19)
C01S 0.056(3) 0.109(5) 0.087(4) 0.055(4) -0.003(3) 0.005(3)
C01W 0.087(4) 0.103(5) 0.071(3) -0.050(3) 0.032(3) -0.042(3)
C01Z 0.062(3) 0.056(3) 0.059(3) 0.019(2) 0.003(2) 0.012(2)
C2B 0.134(6) 0.107(5) 0.089(4) -0.037(4) -0.038(4) -0.028(5)
C02E 0.067(3) 0.158(6) 0.039(2) -0.024(3) 0.004(2) -0.029(4)
C3B 0.217(11) 0.087(5) 0.070(4) -0.026(4) -0.023(6) -0.033(7)
C4B 0.205(9) 0.060(4) 0.047(3) -0.016(3) 0.017(4) 0.009(5)
C5B 0.137(5) 0.041(2) 0.034(2) -0.0043(18) 0.019(3) 0.013(3)
C6B 0.134(5) 0.042(3) 0.044(2) 0.013(2) 0.045(3) 0.037(3)
C7B 0.189(8) 0.061(3) 0.068(3) 0.025(3) 0.080(5) 0.058(4)
C8B 0.195(9) 0.080(5) 0.129(6) 0.057(4) 0.125(7) 0.081(6)
C9B 0.108(5) 0.089(4) 0.150(6) 0.075(5) 0.100(5) 0.057(4)
C010 0.070(3) 0.035(2) 0.067(3) 0.006(2) 0.018(2) -0.003(2)
C011 0.081(4) 0.040(2) 0.092(4) -0.008(2) 0.051(3) -0.003(2)
C11B 0.064(3) 0.061(3) 0.102(4) 0.042(3) 0.047(3) 0.025(2)
C12B 0.066(3) 0.072(3) 0.038(2) 0.013(2) 0.017(2) 0.013(2)
C013 0.054(3) 0.052(3) 0.065(3) -0.013(2) -0.004(2) -0.007(2)
C13B 0.053(3) 0.107(4) 0.043(2) 0.021(3) -0.0033(19) 0.010(3)
C14B 0.088(4) 0.055(3) 0.070(3) 0.021(2) 0.023(3) 0.018(3)
C15B 0.044(2) 0.104(4) 0.063(3) 0.013(3) 0.007(2) -0.024(3)
C16B 0.091(4) 0.068(3) 0.070(3) -0.024(3) 0.020(3) -0.029(3)
C017 0.104(4) 0.048(3) 0.083(3) -0.034(3) 0.051(3) -0.030(3)
C17B 0.051(3) 0.097(4) 0.044(2) 0.014(2) -0.0041(19) -0.019(3)
C18B 0.071(3) 0.061(3) 0.069(3) 0.020(2) 0.027(2) 0.037(2)
C19B 0.073(3) 0.060(3) 0.139(5) 0.003(3) 0.070(3) 0.008(3)
C20B 0.112(5) 0.063(3) 0.060(3) -0.025(2) 0.013(3) 0.013(3)
C21B 0.105(5) 0.057(4) 0.040(3) 0.010(3) 0.001(3) 0.008(3)
C022 0.072(3) 0.155(7) 0.054(3) 0.050(4) -0.020(3) -0.028(4)
C22B 0.110(6) 0.071(4) 0.078(4) 0.043(4) 0.052(4) 0.061(4)
C23B 0.076(4) 0.036(3) 0.112(5) 0.015(3) -0.024(4) -0.006(3)
K003 0.0436(6) 0.0400(6) 0.0422(6) 0.000 0.0014(5) 0.000
K005 0.0495(7) 0.0368(6) 0.0554(7) 0.000 -0.0133(5) 0.000
C2 0.088(18) 0.019(9) 0.091(17) 0.012(10) -0.030(15) -0.011(10)
C3 0.095(19) 0.062(15) 0.056(13) -0.003(12) -0.024(13) 0.051(14)
C9 0.051(3) 0.097(4) 0.044(2) 0.014(2) -0.0041(19) -0.019(3)
O1_1 0.059(5) 0.078(5) 0.035(4) 0.005(3) -0.003(3) 0.018(4)
O2_1 0.068(5) 0.037(3) 0.080(5) -0.005(3) 0.025(3) -0.001(3)
O3_1 0.050(4) 0.094(6) 0.057(4) -0.010(4) 0.003(3) -0.029(4)
O4_1 0.056(5) 0.140(8) 0.051(4) 0.026(5) 0.012(4) 0.045(6)
O5_1 0.134(8) 0.052(4) 0.078(7) 0.019(3) 0.050(5) 0.045(4)
O6_1 0.068(5) 0.056(4) 0.065(5) -0.027(3) 0.029(4) -0.038(4)
C1_1 0.079(8) 0.085(7) 0.066(7) 0.036(5) 0.012(6) 0.045(6)
C2_1 0.080(8) 0.078(11) 0.079(9) 0.022(7) 0.041(6) 0.042(7)
C3_1 0.117(8) 0.045(5) 0.094(9) -0.015(5) 0.040(8) -0.019(6)
C4_1 0.108(11) 0.048(7) 0.134(15) -0.048(8) 0.028(10) -0.032(8)
C5_1 0.044(7) 0.160(12) 0.049(7) -0.026(8) -0.001(5) -0.008(8)
C6_1 0.050(11) 0.200(13) 0.091(13) 0.020(11) -0.046(9) 0.010(12)
C7_1 0.088(11) 0.148(11) 0.098(11) 0.052(8) 0.007(7) 0.088(9)
C8_1 0.179(15) 0.114(16) 0.137(18) 0.025(13) 0.019(13) 0.099(13)
C9_1 0.182(10) 0.030(5) 0.103(8) -0.005(5) 0.075(8) 0.011(6)
C10_1 0.139(9) 0.044(7) 0.079(9) -0.029(6) 0.079(7) -0.044(7)
C11_1 0.050(6) 0.121(9) 0.069(7) -0.029(6) 0.016(5) -0.037(6)
C12_1 0.041(9) 0.137(8) 0.023(5) -0.007(5) 0.014(5) 0.001(7)
O1_2 0.052(10) 0.036(9) 0.049(9) -0.015(7) 0.011(8) -0.007(8)
O2_2 0.093(17) 0.063(9) 0.033(10) 0.004(8) -0.030(9) 0.000(10)
O3_2 0.059(10) 0.032(9) 0.034(7) -0.003(7) 0.012(7) 0.013(7)
O4_2 0.105(17) 0.053(13) 0.076(14) -0.026(10) -0.012(11) -0.001(11)
O5_2 0.055(11) 0.100(14) 0.032(10) -0.007(8) 0.019(10) -0.011(9)
O6_2 0.072(18) 0.051(14) 0.059(14) 0.001(12) 0.011(11) 0.015(11)
C1_2 0.058(13) 0.057(11) 0.049(15) -0.016(10) 0.005(11) -0.035(10)
C2_2 0.056(17) 0.076(11) 0.033(12) -0.011(9) -0.014(11) -0.016(11)
C3_2 0.062(19) 0.070(11) 0.051(15) 0.019(10) -0.016(14) 0.002(12)
C4_2 0.055(10) 0.054(11) 0.055(15) 0.020(10) 0.010(9) 0.016(9)
C5_2 0.099(13) 0.034(10) 0.029(12) -0.010(10) 0.024(9) 0.006(10)
C6_2 0.105(17) 0.045(12) 0.08(2) -0.015(15) -0.005(15) -0.019(12)
C7_2 0.10(2) 0.097(18) 0.058(19) -0.022(16) -0.010(17) -0.019(16)
C8_2 0.06(2) 0.105(17) 0.053(16) -0.018(12) 0.008(13) -0.004(15)
C9_2 0.038(14) 0.113(17) 0.044(13) 0.007(11) 0.018(10) -0.006(12)
C10_2 0.069(16) 0.104(17) 0.043(13) 0.015(13) 0.015(11) 0.009(15)
C11_2 0.074(17) 0.026(8) 0.070(12) 0.009(8) 0.034(10) 0.019(9)
C12_2 0.09(2) 0.040(11) 0.109(19) 0.010(14) 0.004(16) -0.009(11)
O1_3 0.049(12) 0.059(13) 0.042(12) -0.005(10) 0.019(11) -0.007(10)
O2_3 0.063(15) 0.048(10) 0.040(17) -0.008(11) 0.014(10) 0.004(13)
O3_3 0.062(17) 0.063(14) 0.034(12) 0.024(9) 0.006(11) 0.004(12)
O4_3 0.032(12) 0.041(14) 0.071(19) 0.007(14) 0.000(12) -0.016(11)
O5_3 0.050(8) 0.049(9) 0.029(14) 0.005(8) -0.006(11) 0.002(10)
O6_3 0.064(17) 0.044(13) 0.023(10) 0.004(9) -0.006(9) -0.005(10)
C1_3 0.092(19) 0.058(15) 0.05(2) 0.000(16) 0.004(17) -0.006(14)
C2_3 0.093(18) 0.049(16) 0.040(14) -0.007(12) 0.007(13) -0.010(14)
C3_3 0.061(17) 0.072(18) 0.047(18) 0.019(13) 0.017(13) 0.003(15)
C4_3 0.051(18) 0.059(16) 0.054(17) 0.030(12) -0.003(13) 0.010(14)
C5_3 0.037(17) 0.069(16) 0.043(17) 0.010(12) 0.002(13) 0.018(13)
C6_3 0.045(15) 0.062(15) 0.042(17) -0.008(13) -0.007(13) 0.004(12)
C7_3 0.043(13) 0.051(14) 0.024(13) -0.004(11) -0.003(11) -0.019(11)
C8_3 0.048(14) 0.061(18) 0.021(14) 0.014(12) 0.001(11) -0.013(12)
C9_3 0.060(11) 0.040(12) 0.048(15) 0.007(10) -0.023(11) 0.002(10)
C10_3 0.060(11) 0.040(12) 0.048(15) 0.007(10) -0.023(11) 0.002(10)
C11_3 0.043(16) 0.063(14) 0.035(15) -0.007(12) -0.004(12) -0.012(13)
C12_3 0.052(15) 0.059(15) 0.04(2) -0.011(14) -0.001(15) -0.005(12)

_geom_special_details            
;
 All esds (except the esd in the dihedral angle between two l.s. planes)
 are estimated using the full covariance matrix.  The cell esds are taken
 into account individually in the estimation of esds in distances, angles
 and torsion angles; correlations between esds in cell parameters are only
 used when they are defined by crystal symmetry.  An approximate (isotropic)
 treatment of cell esds is used for estimating esds involving l.s. planes.
;
loop_
_geom_bond_atom_site_label_1
_geom_bond_atom_site_label_2
_geom_bond_distance
_geom_bond_site_symmetry_2
_geom_bond_publ_flag
Mn0A N1A 2.149(3) . ?
Mn0A N2A 2.144(3) . ?
Mn0A N3A 2.077(2) . ?
Mn0A N4A 2.072(3) . ?
Si1A N4A 1.699(3) . ?
Si1A C17A 1.877(5) . ?
Si1A C18A 1.859(4) . ?
Si1A C19A 1.881(4) . ?
Si2A N4A 1.685(3) . ?
Si2A C00W 1.882(4) . ?
Si2A C20A 1.876(4) . ?
Si2A C21A 1.883(4) . ?
Si3A N3A 1.686(3) . ?
Si3A C11A 1.877(5) . ?
Si3A C12A 1.886(4) . ?
Si3A C13A 1.866(5) . ?
Si4A N3A 1.687(3) . ?
Si4A C14A 1.889(5) . ?
Si4A C15A 1.858(5) . ?
Si4A C16A 1.873(6) . ?
N1A C1A 1.350(5) . ?
N1A C5A 1.377(5) . ?
N2A C6A 1.394(5) . ?
N2A C10A 1.335(5) . ?
C1A C2A 1.366(5) . ?
C2A C3A 1.398(7) . ?
C3A C4A 1.356(7) . ?
C4A C5A 1.427(5) . ?
C5A C6A 1.407(6) . ?
C6A C7A 1.422(5) . ?
C7A C8A 1.345(7) . ?
C8A C9A 1.406(7) . ?
C9A C10A 1.387(6) . ?
C12A K003 3.515(5) 3_545 ?
Mn1B N1B 2.139(4) . ?
Mn1B N2B 2.170(3) . ?
Mn1B N3B 2.082(2) . ?
Mn1B N4B 2.064(3) . ?
K004 O00F 2.748(3) . ?
K004 O00H 2.762(3) . ?
K004 O00K 2.759(3) . ?
K004 O00L 2.835(3) . ?
K004 O00N 2.735(3) . ?
K004 O00P 2.832(3) . ?
Si1B N3B 1.684(3) . ?
Si1B C18B 1.852(4) . ?
Si1B C19B 1.880(4) . ?
Si1B C20B 1.880(5) . ?
Si2B N3B 1.694(3) . ?
Si2B C21B 1.900(5) . ?
Si2B C22B 1.849(5) . ?
Si2B C23B 1.882(6) . ?
Si2B C2 1.94(2) . ?
Si2B C3 1.87(3) . ?
Si2B C9 1.77(2) . ?
Si3B N4B 1.687(3) . ?
Si3B C15B 1.883(4) . ?
Si3B C16B 1.880(5) . ?
Si3B C17B 1.875(5) . ?
Si4B N4B 1.693(3) . ?
Si4B C12B 1.884(4) . ?
Si4B C13B 1.876(5) . ?
Si4B C14B 1.882(5) . ?
O00F C010 1.416(5) . ?
O00F C013 1.415(5) . ?
O00H C01H 1.433(6) . ?
O00H C01S 1.413(6) . ?
O00K C01N 1.415(6) . ?
O00K C011 1.415(5) . ?
O00L C01G 1.418(5) . ?
O00L C01Z 1.416(5) . ?
O00N C01W 1.414(7) . ?
O00N C017 1.436(7) . ?
O00P C02E 1.438(7) . ?
O00P C022 1.411(7) . ?
N1B C1B 1.348(7) . ?
N1B C5B 1.357(6) . ?
N2B C6B 1.376(7) . ?
N2B C11B 1.357(6) . ?
C1B C2B 1.355(8) . ?
C01G C013 1.466(7) . ?
C01H C010 1.470(7) . ?
C01N C01Z 1.477(7) . ?
C01S C022 1.485(10) . ?
C01W C02E 1.474(9) . ?
C2B C3B 1.395(12) . ?
C3B C4B 1.342(12) . ?
C4B C5B 1.424(9) . ?
C5B C6B 1.424(8) . ?
C6B C7B 1.444(7) . ?
C7B C8B 1.330(12) . ?
C8B C9B 1.411(12) . ?
C9B C11B 1.410(7) . ?
C011 C017 1.483(8) . ?
C19B K005 3.412(6) 1_556 ?
K003 O1_2 2.76(4) . ?
K003 O2_2 2.83(3) . ?
K003 O3_2 2.84(3) . ?
K003 O4_2 2.69(4) . ?
K003 O5_2 2.76(3) . ?
K003 O6_2 2.74(5) . ?
K003 O1_3 2.74(3) . ?
K003 O2_3 2.80(2) . ?
K003 O3_3 2.88(3) . ?
K003 O4_3 2.82(4) . ?
K003 O5_3 2.76(2) . ?
K003 O6_3 2.67(3) . ?
K005 O1_1 2.819(8) . ?
K005 O2_1 2.782(7) . ?
K005 O3_1 2.717(8) . ?
K005 O4_1 2.725(8) . ?
K005 O5_1 2.755(8) . ?
K005 O6_1 2.842(9) . ?
K005 C5_1 3.537(16) . ?
O1_1 C1_1 1.418(12) . ?
O1_1 C12_1 1.390(14) . ?
O2_1 C2_1 1.395(15) . ?
O2_1 C3_1 1.394(10) . ?
O3_1 C4_1 1.393(16) . ?
O3_1 C5_1 1.406(13) . ?
O4_1 C6_1 1.391(16) . ?
O4_1 C7_1 1.419(15) . ?
O5_1 C8_1 1.407(17) . ?
O5_1 C9_1 1.431(12) . ?
O6_1 C10_1 1.413(13) . ?
O6_1 C11_1 1.408(13) . ?
C1_1 C2_1 1.445(15) . ?
C3_1 C4_1 1.432(16) . ?
C5_1 C6_1 1.444(16) . ?
C7_1 C8_1 1.456(16) . ?
C9_1 C10_1 1.458(15) . ?
C11_1 C12_1 1.469(15) . ?
O1_2 C1_2 1.414(18) . ?
O1_2 C12_2 1.398(17) . ?
O2_2 C2_2 1.417(17) . ?
O2_2 C3_2 1.396(17) . ?
O3_2 C4_2 1.395(17) . ?
O3_2 C5_2 1.399(15) . ?
O4_2 C6_2 1.411(18) . ?
O4_2 C7_2 1.412(19) . ?
O5_2 C8_2 1.400(19) . ?
O5_2 C9_2 1.414(18) . ?
O6_2 C10_2 1.415(18) . ?
O6_2 C11_2 1.399(18) . ?
C1_2 C2_2 1.467(19) . ?
C3_2 C4_2 1.45(2) . ?
C5_2 C6_2 1.448(19) . ?
C7_2 C8_2 1.45(2) . ?
C9_2 C10_2 1.45(2) . ?
C11_2 C12_2 1.454(18) . ?
O1_3 C1_3 1.40(2) . ?
O1_3 C12_3 1.41(2) . ?
O2_3 C2_3 1.411(19) . ?
O2_3 C3_3 1.41(2) . ?
O3_3 C4_3 1.409(19) . ?
O3_3 C5_3 1.40(2) . ?
O4_3 C6_3 1.40(2) . ?
O4_3 C7_3 1.421(19) . ?
O5_3 C8_3 1.41(2) . ?
O5_3 C9_3 1.41(2) . ?
O6_3 C10_3 1.408(19) . ?
O6_3 C11_3 1.40(2) . ?
C1_3 C2_3 1.46(2) . ?
C3_3 C4_3 1.46(2) . ?
C5_3 C6_3 1.46(2) . ?
C7_3 C8_3 1.47(2) . ?
C9_3 C10_3 1.46(2) . ?
C11_3 C12_3 1.45(2) . ?

loop_
_geom_angle_atom_site_label_1
_geom_angle_atom_site_label_2
_geom_angle_atom_site_label_3
_geom_angle
_geom_angle_site_symmetry_1
_geom_angle_site_symmetry_3
_geom_angle_publ_flag
N2A Mn0A N1A 76.23(12) . . ?
N3A Mn0A N1A 125.11(11) . . ?
N3A Mn0A N2A 103.02(10) . . ?
N4A Mn0A N1A 99.86(11) . . ?
N4A Mn0A N2A 123.69(10) . . ?
N4A Mn0A N3A 121.94(11) . . ?
N4A Si1A C17A 113.03(18) . . ?
N4A Si1A C18A 113.51(15) . . ?
N4A Si1A C19A 115.27(18) . . ?
C17A Si1A C19A 104.1(3) . . ?
C18A Si1A C17A 105.9(2) . . ?
C18A Si1A C19A 103.9(2) . . ?
N4A Si2A C00W 113.41(17) . . ?
N4A Si2A C20A 112.40(16) . . ?
N4A Si2A C21A 112.89(17) . . ?
C00W Si2A C21A 106.93(19) . . ?
C20A Si2A C00W 105.11(18) . . ?
C20A Si2A C21A 105.5(2) . . ?
N3A Si3A C11A 112.05(16) . . ?
N3A Si3A C12A 114.3(2) . . ?
N3A Si3A C13A 111.98(17) . . ?
C11A Si3A C12A 105.0(2) . . ?
C13A Si3A C11A 106.9(3) . . ?
C13A Si3A C12A 106.0(3) . . ?
N3A Si4A C14A 113.1(2) . . ?
N3A Si4A C15A 112.64(17) . . ?
N3A Si4A C16A 113.6(3) . . ?
C15A Si4A C14A 103.2(3) . . ?
C15A Si4A C16A 105.9(3) . . ?
C16A Si4A C14A 107.6(3) . . ?
C1A N1A Mn0A 125.5(2) . . ?
C1A N1A C5A 118.2(3) . . ?
C5A N1A Mn0A 115.4(2) . . ?
C6A N2A Mn0A 114.8(2) . . ?
C10A N2A Mn0A 126.0(2) . . ?
C10A N2A C6A 118.8(3) . . ?
Si3A N3A Mn0A 115.60(15) . . ?
Si3A N3A Si4A 125.79(15) . . ?
Si4A N3A Mn0A 117.50(15) . . ?
Si1A N4A Mn0A 116.06(14) . . ?
Si2A N4A Mn0A 118.32(14) . . ?
Si2A N4A Si1A 125.57(16) . . ?
N1A C1A C2A 125.0(4) . . ?
C1A C2A C3A 117.2(4) . . ?
C4A C3A C2A 120.2(4) . . ?
C3A C4A C5A 120.7(4) . . ?
N1A C5A C4A 118.8(4) . . ?
N1A C5A C6A 116.3(3) . . ?
C6A C5A C4A 124.9(4) . . ?
N2A C6A C5A 116.8(3) . . ?
N2A C6A C7A 118.4(4) . . ?
C5A C6A C7A 124.7(4) . . ?
C8A C7A C6A 121.0(4) . . ?
C7A C8A C9A 120.4(4) . . ?
C10A C9A C8A 117.0(4) . . ?
N2A C10A C9A 124.2(4) . . ?
Si3A C12A K003 158.9(3) . 3_545 ?
N1B Mn1B N2B 74.94(16) . . ?
N3B Mn1B N1B 101.49(13) . . ?
N3B Mn1B N2B 128.60(11) . . ?
N4B Mn1B N1B 126.84(13) . . ?
N4B Mn1B N2B 102.12(12) . . ?
N4B Mn1B N3B 118.06(11) . . ?
O00F K004 O00H 61.29(9) . . ?
O00F K004 O00K 117.44(9) . . ?
O00F K004 O00L 59.62(8) . . ?
O00F K004 O00P 118.93(11) . . ?
O00H K004 O00L 119.49(10) . . ?
O00H K004 O00P 59.78(11) . . ?
O00K K004 O00H 177.82(9) . . ?
O00K K004 O00L 58.89(9) . . ?
O00K K004 O00P 121.92(11) . . ?
O00N K004 O00F 177.18(9) . . ?
O00N K004 O00H 119.90(12) . . ?
O00N K004 O00K 61.45(11) . . ?
O00N K004 O00L 119.76(11) . . ?
O00N K004 O00P 61.56(12) . . ?
O00P K004 O00L 177.04(9) . . ?
N3B Si1B C18B 112.88(16) . . ?
N3B Si1B C19B 114.0(2) . . ?
N3B Si1B C20B 113.3(2) . . ?
C18B Si1B C19B 105.7(3) . . ?
C18B Si1B C20B 106.4(3) . . ?
C20B Si1B C19B 103.7(3) . . ?
N3B Si2B C21B 113.7(2) . . ?
N3B Si2B C22B 113.5(2) . . ?
N3B Si2B C23B 114.8(2) . . ?
N3B Si2B C2 107.9(7) . . ?
N3B Si2B C3 105.7(9) . . ?
N3B Si2B C9 116.2(9) . . ?
C22B Si2B C21B 104.3(3) . . ?
C22B Si2B C23B 105.0(4) . . ?
C23B Si2B C21B 104.5(3) . . ?
C3 Si2B C2 103.2(11) . . ?
C9 Si2B C2 107.8(12) . . ?
C9 Si2B C3 115.1(11) . . ?
N4B Si3B C15B 113.32(19) . . ?
N4B Si3B C16B 113.0(2) . . ?
N4B Si3B C17B 111.51(19) . . ?
C16B Si3B C15B 106.2(3) . . ?
C17B Si3B C15B 105.7(2) . . ?
C17B Si3B C16B 106.5(2) . . ?
N4B Si4B C12B 111.80(17) . . ?
N4B Si4B C13B 112.24(18) . . ?
N4B Si4B C14B 113.4(2) . . ?
C13B Si4B C12B 107.2(2) . . ?
C13B Si4B C14B 105.2(3) . . ?
C14B Si4B C12B 106.6(2) . . ?
C010 O00F K004 114.0(2) . . ?
C013 O00F K004 117.3(2) . . ?
C013 O00F C010 111.6(3) . . ?
C01H O00H K004 114.4(2) . . ?
C01S O00H K004 118.0(3) . . ?
C01S O00H C01H 113.4(4) . . ?
C01N O00K K004 117.4(2) . . ?
C01N O00K C011 112.3(3) . . ?
C011 O00K K004 114.8(3) . . ?
C01G O00L K004 112.4(2) . . ?
C01Z O00L K004 114.9(3) . . ?
C01Z O00L C01G 112.0(3) . . ?
C01W O00N K004 113.6(3) . . ?
C01W O00N C017 114.2(4) . . ?
C017 O00N K004 114.4(3) . . ?
C02E O00P K004 112.0(3) . . ?
C022 O00P K004 113.4(3) . . ?
C022 O00P C02E 113.2(4) . . ?
C1B N1B Mn1B 124.7(3) . . ?
C1B N1B C5B 116.3(5) . . ?
C5B N1B Mn1B 118.0(4) . . ?
C6B N2B Mn1B 114.9(3) . . ?
C11B N2B Mn1B 125.5(4) . . ?
C11B N2B C6B 119.5(4) . . ?
Si1B N3B Mn1B 120.29(15) . . ?
Si1B N3B Si2B 123.08(15) . . ?
Si2B N3B Mn1B 116.62(13) . . ?
Si3B N4B Mn1B 117.38(15) . . ?
Si3B N4B Si4B 124.42(17) . . ?
Si4B N4B Mn1B 116.06(16) . . ?
N1B C1B C2B 126.0(6) . . ?
O00L C01G C013 108.1(4) . . ?
O00H C01H C010 109.4(4) . . ?
O00K C01N C01Z 107.8(3) . . ?
O00H C01S C022 109.9(5) . . ?
O00N C01W C02E 110.8(5) . . ?
O00L C01Z C01N 107.7(3) . . ?
C1B C2B C3B 116.9(8) . . ?
O00P C02E C01W 108.4(4) . . ?
C4B C3B C2B 120.3(7) . . ?
C3B C4B C5B 119.6(7) . . ?
N1B C5B C4B 120.8(7) . . ?
N1B C5B C6B 114.6(4) . . ?
C6B C5B C4B 124.5(6) . . ?
N2B C6B C5B 117.2(4) . . ?
N2B C6B C7B 119.1(6) . . ?
C5B C6B C7B 123.6(6) . . ?
C8B C7B C6B 121.4(7) . . ?
C7B C8B C9B 119.3(6) . . ?
C11B C9B C8B 119.0(7) . . ?
O00F C010 C01H 109.4(3) . . ?
O00K C011 C017 108.3(4) . . ?
N2B C11B C9B 121.7(7) . . ?
O00F C013 C01G 108.6(4) . . ?
O00N C017 C011 110.1(4) . . ?
Si1B C19B K005 123.8(3) . 1_556 ?
O00P C022 C01S 109.1(4) . . ?
O1_2 K003 O2_2 61.8(9) . . ?
O1_2 K003 O3_2 120.5(9) . . ?
O2_2 K003 O3_2 59.7(8) . . ?
O4_2 K003 O1_2 174.1(13) . . ?
O4_2 K003 O2_2 119.9(9) . . ?
O4_2 K003 O3_2 60.4(4) . . ?
O4_2 K003 O5_2 61.3(11) . . ?
O4_2 K003 O6_2 118.4(11) . . ?
O5_2 K003 O1_2 116.6(11) . . ?
O5_2 K003 O2_2 175.9(10) . . ?
O5_2 K003 O3_2 121.0(9) . . ?
O6_2 K003 O1_2 60.8(3) . . ?
O6_2 K003 O2_2 121.5(10) . . ?
O6_2 K003 O3_2 178.7(11) . . ?
O6_2 K003 O5_2 57.9(11) . . ?
O1_3 K003 O2_3 61.1(7) . . ?
O1_3 K003 O3_3 117.7(8) . . ?
O1_3 K003 O4_3 171.2(9) . . ?
O1_3 K003 O5_3 121.0(7) . . ?
O2_3 K003 O3_3 58.5(7) . . ?
O2_3 K003 O4_3 117.2(7) . . ?
O4_3 K003 O3_3 59.0(7) . . ?
O5_3 K003 O2_3 175.6(10) . . ?
O5_3 K003 O3_3 118.4(8) . . ?
O5_3 K003 O4_3 60.1(7) . . ?
O6_3 K003 O1_3 62.0(7) . . ?
O6_3 K003 O2_3 121.1(8) . . ?
O6_3 K003 O3_3 179.4(9) . . ?
O6_3 K003 O4_3 121.4(7) . . ?
O6_3 K003 O5_3 62.0(7) . . ?
C19B K005 C5_1 105.4(2) 2_656 . ?
O1_1 K005 C19B 73.39(17) . 2_656 ?
O1_1 K005 O6_1 58.8(2) . . ?
O1_1 K005 C5_1 138.0(3) . . ?
O2_1 K005 C19B 80.60(17) . 2_656 ?
O2_1 K005 O1_1 58.7(2) . . ?
O2_1 K005 O6_1 116.4(2) . . ?
O2_1 K005 C5_1 79.4(3) . . ?
O3_1 K005 C19B 107.51(17) . 2_656 ?
O3_1 K005 O1_1 117.4(3) . . ?
O3_1 K005 O2_1 59.9(2) . . ?
O3_1 K005 O4_1 61.9(3) . . ?
O3_1 K005 O5_1 123.1(3) . . ?
O3_1 K005 O6_1 176.2(3) . . ?
O3_1 K005 C5_1 21.2(4) . . ?
O4_1 K005 C19B 105.88(17) . 2_656 ?
O4_1 K005 O1_1 178.9(3) . . ?
O4_1 K005 O2_1 120.4(3) . . ?
O4_1 K005 O5_1 62.3(3) . . ?
O4_1 K005 O6_1 121.9(3) . . ?
O4_1 K005 C5_1 41.2(4) . . ?
O5_1 K005 C19B 97.14(19) . 2_656 ?
O5_1 K005 O1_1 118.6(3) . . ?
O5_1 K005 O2_1 176.8(2) . . ?
O5_1 K005 O6_1 60.6(3) . . ?
O5_1 K005 C5_1 103.4(4) . . ?
O6_1 K005 C19B 71.90(16) . 2_656 ?
O6_1 K005 C5_1 162.5(3) . . ?
C1_1 O1_1 K005 115.1(9) . . ?
C12_1 O1_1 K005 116.2(8) . . ?
C12_1 O1_1 C1_1 108.9(10) . . ?
C2_1 O2_1 K005 117.1(10) . . ?
C3_1 O2_1 K005 114.3(6) . . ?
C3_1 O2_1 C2_1 113.1(10) . . ?
C4_1 O3_1 K005 119.2(10) . . ?
C4_1 O3_1 C5_1 117.0(13) . . ?
C5_1 O3_1 K005 114.4(11) . . ?
C6_1 O4_1 K005 116.6(11) . . ?
C6_1 O4_1 C7_1 114.8(13) . . ?
C7_1 O4_1 K005 114.2(11) . . ?
C8_1 O5_1 K005 116.0(13) . . ?
C8_1 O5_1 C9_1 115.6(12) . . ?
C9_1 O5_1 K005 116.9(5) . . ?
C10_1 O6_1 K005 111.3(9) . . ?
C11_1 O6_1 K005 114.3(9) . . ?
C11_1 O6_1 C10_1 116.4(10) . . ?
O1_1 C1_1 C2_1 107.4(13) . . ?
O2_1 C2_1 C1_1 111.3(13) . . ?
O2_1 C3_1 C4_1 112.2(14) . . ?
O3_1 C4_1 C3_1 111.6(14) . . ?
O3_1 C5_1 K005 44.4(8) . . ?
O3_1 C5_1 C6_1 116.0(16) . . ?
C6_1 C5_1 K005 79.7(11) . . ?
O4_1 C6_1 C5_1 110.7(17) . . ?
O4_1 C7_1 C8_1 115.1(18) . . ?
O5_1 C8_1 C7_1 111.8(17) . . ?
O5_1 C9_1 C10_1 108.5(10) . . ?
O6_1 C10_1 C9_1 112.1(10) . . ?
O6_1 C11_1 C12_1 109.7(11) . . ?
O1_1 C12_1 C11_1 108.6(11) . . ?
C1_2 O1_2 K003 117(3) . . ?
C12_2 O1_2 K003 115(3) . . ?
C12_2 O1_2 C1_2 113(3) . . ?
C2_2 O2_2 K003 110(2) . . ?
C3_2 O2_2 K003 113(3) . . ?
C3_2 O2_2 C2_2 128(3) . . ?
C4_2 O3_2 K003 114(2) . . ?
C4_2 O3_2 C5_2 109(3) . . ?
C5_2 O3_2 K003 116(2) . . ?
C6_2 O4_2 K003 117(3) . . ?
C6_2 O4_2 C7_2 125(4) . . ?
C7_2 O4_2 K003 113(3) . . ?
C8_2 O5_2 K003 119(3) . . ?
C8_2 O5_2 C9_2 96(3) . . ?
C9_2 O5_2 K003 118(2) . . ?
C10_2 O6_2 K003 119(3) . . ?
C11_2 O6_2 K003 119(3) . . ?
C11_2 O6_2 C10_2 115(3) . . ?
O1_2 C1_2 C2_2 107(3) . . ?
O2_2 C2_2 C1_2 118(3) . . ?
O2_2 C3_2 C4_2 117(3) . . ?
O3_2 C4_2 C3_2 106(3) . . ?
O3_2 C5_2 C6_2 107(4) . . ?
O4_2 C6_2 C5_2 119(4) . . ?
O4_2 C7_2 K003 45(2) . . ?
O4_2 C7_2 C8_2 123(5) . . ?
C8_2 C7_2 K003 84(3) . . ?
O5_2 C8_2 C7_2 104(4) . . ?
O5_2 C9_2 C10_2 102(3) . . ?
O6_2 C10_2 C9_2 115(3) . . ?
O6_2 C11_2 C12_2 110(3) . . ?
O1_2 C12_2 C11_2 117(3) . . ?
C1_3 O1_3 K003 114(3) . . ?
C1_3 O1_3 C12_3 112(3) . . ?
C12_3 O1_3 K003 113(2) . . ?
C2_3 O2_3 K003 108(2) . . ?
C3_3 O2_3 K003 112(3) . . ?
C3_3 O2_3 C2_3 116(3) . . ?
C4_3 O3_3 K003 110(2) . . ?
C5_3 O3_3 K003 115(2) . . ?
C5_3 O3_3 C4_3 112(3) . . ?
C6_3 O4_3 K003 116(2) . . ?
C6_3 O4_3 C7_3 115(3) . . ?
C7_3 O4_3 K003 112(2) . . ?
C8_3 O5_3 K003 117(2) . . ?
C9_3 O5_3 K003 110(2) . . ?
C9_3 O5_3 C8_3 116(3) . . ?
C10_3 O6_3 K003 118(2) . . ?
C11_3 O6_3 K003 113(3) . . ?
C11_3 O6_3 C10_3 117(3) . . ?
O1_3 C1_3 C2_3 108(3) . . ?
O2_3 C2_3 K003 49.6(16) . . ?
O2_3 C2_3 C1_3 107(4) . . ?
C1_3 C2_3 K003 80(2) . . ?
O2_3 C3_3 C4_3 111(3) . . ?
O3_3 C4_3 C3_3 99(3) . . ?
O3_3 C5_3 C6_3 111(3) . . ?
O4_3 C6_3 C5_3 111(3) . . ?
O4_3 C7_3 C8_3 109(3) . . ?
O5_3 C8_3 C7_3 109(3) . . ?
O5_3 C9_3 K003 47.9(17) . . ?
O5_3 C9_3 C10_3 112(3) . . ?
C10_3 C9_3 K003 80(2) . . ?
O6_3 C10_3 C9_3 109(3) . . ?
O6_3 C11_3 K003 45(2) . . ?
O6_3 C11_3 C12_3 115(4) . . ?
C12_3 C11_3 K003 81(2) . . ?
O1_3 C12_3 C11_3 104(3) . . ?

_shelx_res_file                  
;
TITL pimx4_a.res in C2
    k{18c6}mn6.res
    created by SHELXL-2018/3 at 16:08:50 on 23-May-2019
REM Old TITL pimx4_a.res in C20A
REM SHELXT solution in C20A
REM R1 0.128, Rweak 0.039, Alpha 0.007, Orientation as input
REM Flack x = 0.091 ( 0.008 ) from Parsons' quotients
REM Formula found by SHELXT: C68 K7 Mn2 N9 O13 H9B
CELL 0.71073 34.8403 18.4715 14.5302 90 96.555 90
ZERR 8 0.0017 0.0011 0.0008 0 0.004 0
LATT -7
SYMM -X,+Y,-Z
SFAC C H K Mn N O Si
UNIT 272 544 8 8 32 48 32
EQIV $1 +X,+Y,-1+Z
DFIX_1 1.45 C1 C2 C3 C4 C5 C6 C7 C8 C9 C10 C11 C12
SADI_CRO O1 C1 O1 C12 O2 C2 O2 C3 O3 C4 O3 C5 O4 C6 O4 C7 O5 C8 O5 C9 O6 =
 C10 O6 C11
SADI_CRO C1 C2 C3 C4 C5 C6 C7 C8 C9 C10 C11 C12
SIMU_CRO O1 O2 O3 O4 O5 O6 C1 C2 C3 C4 C5 C6 C7 C8 C9 C10 C11 C12
RIGU_CRO O1 O2 O3 O4 O5 O6 C1 C2 C3 C4 C5 C6 C7 C8 C9 C10 C11 C12
ISOR_1 O1 > C12
EADP_3 C9 C10
EADP C17B C9

L.S. 30 0 0
PLAN  20
SIZE 0.07 0.18 0.27
TEMP -123.15
FREE K003 C3_2
FREE K003 C12_3
FREE K005 C19B_$1
FREE K004 C12B
FREE C2_1 C3_1
list 4
fmap 2
acta
TWIN -1 0 0 0 -1 0 0 0 -1 2
OMIT 0 55
REM <olex2.extras>
REM <HklSrc "%.\\PIMX004.hkl">
REM </olex2.extras>

WGHT    0.044200
BASF   0.08612
FVAR       0.10777   0.66949
MN0A  4    0.866226    0.221372    0.908704    11.00000    0.03399    0.01976 =
         0.02767    0.00019    0.00988   -0.00069
SI1A  7    0.844939    0.332226    1.064786    11.00000    0.04297    0.02850 =
         0.03133   -0.00652    0.00277    0.00338
SI2A  7    0.825977    0.377203    0.865768    11.00000    0.02818    0.02502 =
         0.03718   -0.00044   -0.00082    0.00121
SI3A  7    0.895779    0.145419    0.732553    11.00000    0.06436    0.04117 =
         0.02677    0.00040    0.01235    0.01787
SI4A  7    0.942938    0.268887    0.819255    11.00000    0.03430    0.04781 =
         0.07761    0.01533    0.02278    0.00201
N1A   5    0.816603    0.153383    0.916078    11.00000    0.04647    0.02472 =
         0.03797   -0.00408    0.01423   -0.00622
N2A   5    0.887053    0.137817    1.003952    11.00000    0.05127    0.02463 =
         0.03042    0.00283    0.01066    0.00236
N3A   5    0.903527    0.215143    0.807235    11.00000    0.03656    0.03281 =
         0.03124    0.00752    0.01253    0.00513
N4A   5    0.844312    0.319217    0.948891    11.00000    0.03147    0.02028 =
         0.03334   -0.00242    0.00310    0.00060
C00W  1    0.773757    0.400288    0.872360    11.00000    0.03422    0.04149 =
         0.05587   -0.01041   -0.00450    0.00615
AFIX 137
H00A  2    0.771760    0.432687    0.925011    11.00000   -1.50000
H00B  2    0.759189    0.355813    0.880540    11.00000   -1.50000
H00C  2    0.763125    0.424388    0.814962    11.00000   -1.50000
AFIX   0
C1A   1    0.780480    0.167516    0.876023    11.00000    0.04358    0.03715 =
         0.05121   -0.00834    0.01454   -0.00486
AFIX  43
H1A   2    0.777138    0.207786    0.835227    11.00000   -1.20000
AFIX   0
C2A   1    0.748384    0.128300    0.889718    11.00000    0.04262    0.05282 =
         0.06774   -0.01225    0.01747   -0.01152
AFIX  43
H2AA  2    0.723683    0.140153    0.858759    11.00000   -1.20000
AFIX   0
C3A   1    0.753425    0.069992    0.951216    11.00000    0.05564    0.04388 =
         0.06895   -0.01152    0.02641   -0.01747
AFIX  43
H3AA  2    0.731955    0.040684    0.961799    11.00000   -1.20000
AFIX   0
C4A   1    0.788894    0.055153    0.995818    11.00000    0.07125    0.02955 =
         0.05068   -0.00542    0.02919   -0.01260
AFIX  43
H4A   2    0.791955    0.016305    1.038876    11.00000   -1.20000
AFIX   0
C5A   1    0.821666    0.097322    0.978708    11.00000    0.05581    0.02430 =
         0.03796   -0.00743    0.02117   -0.00924
C6A   1    0.859471    0.086588    1.021893    11.00000    0.06577    0.02035 =
         0.03173   -0.00191    0.02120   -0.00313
C7A   1    0.871443    0.026711    1.079675    11.00000    0.08634    0.02943 =
         0.03622    0.00269    0.00948   -0.00502
AFIX  43
H7A   2    0.852871   -0.007942    1.094006    11.00000   -1.20000
AFIX   0
C8A   1    0.908666    0.018377    1.114362    11.00000    0.09876    0.03086 =
         0.03946    0.00541    0.00192    0.00402
AFIX  43
H8A   2    0.916114   -0.021955    1.152885    11.00000   -1.20000
AFIX   0
C9A   1    0.936597    0.069019    1.093915    11.00000    0.07403    0.04562 =
         0.04877   -0.00012   -0.00353    0.01302
AFIX  43
H9AA  2    0.963057    0.063623    1.117124    11.00000   -1.20000
AFIX   0
C10A  1    0.923810    0.127195    1.038367    11.00000    0.05470    0.03620 =
         0.03841    0.00094    0.00655    0.00485
AFIX  43
H10A  2    0.942409    0.161732    1.023858    11.00000   -1.20000
AFIX   0
C11A  1    0.843992    0.140032    0.680556    11.00000    0.07849    0.04692 =
         0.03697   -0.00956    0.00708    0.00024
AFIX 137
H11A  2    0.827376    0.133085    0.729899    11.00000   -1.50000
H11C  2    0.840762    0.099156    0.637370    11.00000   -1.50000
H11D  2    0.836806    0.185043    0.647257    11.00000   -1.50000
AFIX   0
C12A  1    0.924588    0.150115    0.630443    11.00000    0.08836    0.12071 =
         0.04448   -0.00268    0.02938    0.03026
AFIX 137
H12D  2    0.917096    0.110034    0.587966    11.00000   -1.50000
H12E  2    0.952195    0.146508    0.652254    11.00000   -1.50000
H12F  2    0.919444    0.196241    0.598046    11.00000   -1.50000
AFIX   0
C13A  1    0.907929    0.056532    0.789672    11.00000    0.13958    0.03760 =
         0.04903   -0.01033   -0.01354    0.02592
AFIX 137
H13D  2    0.892281    0.049715    0.840926    11.00000   -1.50000
H13E  2    0.935385    0.055765    0.813631    11.00000   -1.50000
H13F  2    0.902502    0.017445    0.744451    11.00000   -1.50000
AFIX   0
C14A  1    0.989765    0.216386    0.831764    11.00000    0.04288    0.11022 =
         0.12559   -0.02141    0.02102    0.01661
AFIX 137
H14D  2    0.989733    0.181658    0.882744    11.00000   -1.50000
H14E  2    1.011485    0.249937    0.844977    11.00000   -1.50000
H14F  2    0.992373    0.190322    0.774061    11.00000   -1.50000
AFIX   0
C15A  1    0.946432    0.324184    0.926729    11.00000    0.03661    0.04209 =
         0.11914   -0.01327    0.00584   -0.01042
AFIX 137
H15D  2    0.924096    0.356642    0.924534    11.00000   -1.50000
H15E  2    0.970232    0.352898    0.931717    11.00000   -1.50000
H15F  2    0.946811    0.292174    0.980611    11.00000   -1.50000
AFIX   0
C16A  1    0.944755    0.334675    0.721737    11.00000    0.10917    0.13691 =
         0.13618    0.08021    0.04085   -0.03271
AFIX 137
H16D  2    0.966363    0.368208    0.736728    11.00000   -1.50000
H16E  2    0.920503    0.361984    0.712600    11.00000   -1.50000
H16F  2    0.948350    0.308250    0.664866    11.00000   -1.50000
AFIX   0
C17A  1    0.893990    0.357294    1.123218    11.00000    0.06826    0.08515 =
         0.04129   -0.00096   -0.00915   -0.02418
AFIX 137
H17D  2    0.892201    0.368076    1.188629    11.00000   -1.50000
H17E  2    0.903513    0.400057    1.092977    11.00000   -1.50000
H17F  2    0.911860    0.316835    1.118551    11.00000   -1.50000
AFIX   0
C18A  1    0.829616    0.251290    1.127329    11.00000    0.06852    0.05511 =
         0.03358   -0.00401    0.01594   -0.00435
AFIX 137
H18D  2    0.848811    0.212733    1.125126    11.00000   -1.50000
H18E  2    0.804506    0.234441    1.097823    11.00000   -1.50000
H18F  2    0.827455    0.264035    1.192006    11.00000   -1.50000
AFIX   0
C19A  1    0.812461    0.406392    1.099234    11.00000    0.10389    0.06768 =
         0.04496   -0.01517    0.00395    0.03795
AFIX 137
H19D  2    0.814753    0.409943    1.166934    11.00000   -1.50000
H19E  2    0.785640    0.395383    1.075429    11.00000   -1.50000
H19F  2    0.820065    0.452497    1.073288    11.00000   -1.50000
AFIX   0
C20A  1    0.827520    0.339783    0.746214    11.00000    0.04924    0.04536 =
         0.03845    0.00344    0.00223    0.01163
AFIX 137
H20D  2    0.820302    0.377752    0.700380    11.00000   -1.50000
H20E  2    0.809352    0.299291    0.736130    11.00000   -1.50000
H20F  2    0.853712    0.322761    0.739681    11.00000   -1.50000
AFIX   0
C21A  1    0.853195    0.465357    0.867926    11.00000    0.04487    0.03238 =
         0.07245    0.01068   -0.00008   -0.00289
AFIX 137
H21D  2    0.853947    0.487271    0.929529    11.00000   -1.50000
H21E  2    0.840184    0.498320    0.821558    11.00000   -1.50000
H21F  2    0.879620    0.456363    0.853812    11.00000   -1.50000
AFIX   0

MN1B  4    0.623613    0.206499    0.582424    11.00000    0.03584    0.03336 =
         0.02575    0.00037    0.00846    0.00439
K004  3    0.746027    0.291983    0.248331    11.00000    0.04721    0.03748 =
         0.04496   -0.00642    0.00234    0.00305
SI1B  7    0.566689    0.251481    0.737272    11.00000    0.04338    0.02906 =
         0.04184    0.00090    0.02005    0.00683
SI2B  7    0.601689    0.104720    0.748485    11.00000    0.04089    0.03325 =
         0.03507    0.00477    0.00807    0.01029
SI3B  7    0.677090    0.342776    0.647914    11.00000    0.03612    0.06014 =
         0.03612    0.00098    0.00513   -0.01366
SI4B  7    0.635947    0.343901    0.455670    11.00000    0.04585    0.04887 =
         0.03321    0.01306    0.00693    0.00531
O00F  6    0.726790    0.169560    0.145925    11.00000    0.05301    0.03216 =
         0.05341   -0.00106    0.01082   -0.00385
O00H  6    0.776794    0.160896    0.311426    11.00000    0.04987    0.06609 =
         0.05894    0.02323    0.00653    0.00646
O00K  6    0.712518    0.420674    0.185082    11.00000    0.05927    0.03012 =
         0.07236   -0.00240    0.02504   -0.00022
O00L  6    0.683635    0.294129    0.104917    11.00000    0.05588    0.04250 =
         0.05008    0.00775    0.00170    0.00339
O00N  6    0.766926    0.416377    0.343145    11.00000    0.07119    0.07433 =
         0.06077   -0.02840    0.01959   -0.02832
O00P  6    0.810936    0.288063    0.384663    11.00000    0.06377    0.10477 =
         0.03304    0.00107    0.00356   -0.02032
N1B   5    0.591567    0.140373    0.479955    11.00000    0.07934    0.05246 =
         0.04049   -0.01447   -0.00001    0.00379
N2B   5    0.666561    0.139888    0.525817    11.00000    0.06721    0.04686 =
         0.05629    0.01973    0.03447    0.02005
N3B   5    0.594743    0.186929    0.697712    11.00000    0.03452    0.02897 =
         0.02992    0.00118    0.01064    0.00519
N4B   5    0.644218    0.309665    0.564236    11.00000    0.03116    0.04040 =
         0.03346    0.00482    0.00510   -0.00186
C1B   1    0.552694    0.137282    0.465365    11.00000    0.09020    0.08298 =
         0.06444   -0.02328   -0.02038   -0.01234
AFIX  43
H1B   2    0.538801    0.172075    0.496533    11.00000   -1.20000
AFIX   0
C01G  1    0.686135    0.237684    0.039750    11.00000    0.06843    0.06105 =
         0.05254   -0.01212   -0.01099    0.00090
AFIX  23
H01A  2    0.708547    0.245784    0.004823    11.00000   -1.20000
H01B  2    0.662429    0.236465   -0.004829    11.00000   -1.20000
AFIX   0
C01H  1    0.772791    0.103933    0.244048    11.00000    0.08041    0.03637 =
         0.07963    0.01973    0.02788    0.01359
AFIX  23
H01C  2    0.778254    0.056684    0.274955    11.00000   -1.20000
H01D  2    0.791534    0.111062    0.198516    11.00000   -1.20000
AFIX   0
C01N  1    0.675340    0.417085    0.134722    11.00000    0.04971    0.04299 =
         0.08430    0.02967    0.01510    0.00975
AFIX  23
H01E  2    0.668112    0.464803    0.106937    11.00000   -1.20000
H01F  2    0.655940    0.403420    0.176367    11.00000   -1.20000
AFIX   0
C01S  1    0.813107    0.161308    0.365801    11.00000    0.05558    0.10878 =
         0.08734    0.05493   -0.00300    0.00524
AFIX  23
H01G  2    0.833897    0.166926    0.325246    11.00000   -1.20000
H01H  2    0.817108    0.114756    0.399288    11.00000   -1.20000
AFIX   0
C01W  1    0.805331    0.415481    0.386720    11.00000    0.08734    0.10267 =
         0.07091   -0.05038    0.03238   -0.04231
AFIX  23
H01I  2    0.810032    0.459198    0.425799    11.00000   -1.20000
H01J  2    0.823471    0.416432    0.339021    11.00000   -1.20000
AFIX   0
C01Z  1    0.676575    0.362118    0.061292    11.00000    0.06204    0.05580 =
         0.05911    0.01851    0.00320    0.01187
AFIX  23
H01K  2    0.651686    0.361139    0.020929    11.00000   -1.20000
H01L  2    0.697392    0.373707    0.022647    11.00000   -1.20000
AFIX   0
C2B   1    0.531605    0.089127    0.410345    11.00000    0.13411    0.10676 =
         0.08924   -0.03710   -0.03793   -0.02772
AFIX  43
H2B   2    0.504169    0.090561    0.402435    11.00000   -1.20000
AFIX   0
C02E  1    0.812503    0.350231    0.444583    11.00000    0.06723    0.15831 =
         0.03939   -0.02409    0.00446   -0.02914
AFIX  23
H02A  2    0.838207    0.353403    0.481233    11.00000   -1.20000
H02B  2    0.792694    0.346038    0.488018    11.00000   -1.20000
AFIX   0
C3B   1    0.552069    0.037340    0.365854    11.00000    0.21656    0.08720 =
         0.07031   -0.02647   -0.02285   -0.03285
AFIX  43
H3B   2    0.538514    0.002872    0.325921    11.00000   -1.20000
AFIX   0
C4B   1    0.590811    0.036005    0.379218    11.00000    0.20464    0.06026 =
         0.04718   -0.01589    0.01671    0.00939
AFIX  43
H4B   2    0.604684    0.000026    0.349991    11.00000   -1.20000
AFIX   0
C5B   1    0.611017    0.088846    0.437484    11.00000    0.13738    0.04086 =
         0.03365   -0.00427    0.01904    0.01299
C6B   1    0.651896    0.090964    0.459524    11.00000    0.13446    0.04222 =
         0.04434    0.01268    0.04483    0.03711
C7B   1    0.678267    0.046638    0.414253    11.00000    0.18921    0.06129 =
         0.06777    0.02459    0.08044    0.05836
AFIX  43
H7B   2    0.668250    0.013586    0.367469    11.00000   -1.20000
AFIX   0
C8B   1    0.716289    0.051111    0.436676    11.00000    0.19510    0.07963 =
         0.12883    0.05675    0.12486    0.08083
AFIX  43
H8B   2    0.733194    0.020337    0.407796    11.00000   -1.20000
AFIX   0
C9B   1    0.731271    0.102027    0.503796    11.00000    0.10805    0.08905 =
         0.14968    0.07513    0.09959    0.05745
AFIX  43
H9B   2    0.758368    0.106640    0.519805    11.00000   -1.20000
AFIX   0
C010  1    0.733254    0.104249    0.196364    11.00000    0.06962    0.03527 =
         0.06664    0.00621    0.01826   -0.00325
AFIX  23
H01M  2    0.729617    0.062438    0.153632    11.00000   -1.20000
H01N  2    0.714456    0.099959    0.242279    11.00000   -1.20000
AFIX   0
C011  1    0.715715    0.477678    0.250544    11.00000    0.08084    0.04017 =
         0.09153   -0.00838    0.05119   -0.00329
AFIX  23
H01O  2    0.698503    0.468472    0.298976    11.00000   -1.20000
H01P  2    0.707982    0.524045    0.219644    11.00000   -1.20000
AFIX   0
C11B  1    0.705393    0.145951    0.546730    11.00000    0.06353    0.06106 =
         0.10174    0.04205    0.04749    0.02466
AFIX  43
H11B  2    0.715398    0.180659    0.591420    11.00000   -1.20000
AFIX   0
C12B  1    0.669117    0.303021    0.376040    11.00000    0.06649    0.07171 =
         0.03785    0.01261    0.01715    0.01339
AFIX 137
H12A  2    0.665468    0.250421    0.373608    11.00000   -1.50000
H12B  2    0.695991    0.314043    0.399346    11.00000   -1.50000
H12C  2    0.663146    0.323336    0.313745    11.00000   -1.50000
AFIX   0
C013  1    0.690646    0.169088    0.090584    11.00000    0.05359    0.05219 =
         0.06541   -0.01320   -0.00377   -0.00708
AFIX  23
H01Q  2    0.669550    0.163354    0.130237    11.00000   -1.20000
H01R  2    0.689438    0.128053    0.046519    11.00000   -1.20000
AFIX   0
C13B  1    0.585138    0.327373    0.402014    11.00000    0.05257    0.10662 =
         0.04300    0.02115   -0.00334    0.00964
AFIX 137
H13A  2    0.581002    0.351509    0.341633    11.00000   -1.50000
H13B  2    0.566995    0.346759    0.442588    11.00000   -1.50000
H13C  2    0.580874    0.275218    0.393792    11.00000   -1.50000
AFIX   0
C14B  1    0.642699    0.444869    0.450794    11.00000    0.08816    0.05477 =
         0.06952    0.02102    0.02292    0.01766
AFIX 137
H14A  2    0.636005    0.461736    0.387036    11.00000   -1.50000
H14B  2    0.669707    0.456920    0.471412    11.00000   -1.50000
H14C  2    0.625899    0.468523    0.491397    11.00000   -1.50000
AFIX   0
C15B  1    0.724938    0.364303    0.605814    11.00000    0.04398    0.10407 =
         0.06332    0.01334    0.00699   -0.02420
AFIX 137
H15A  2    0.742468    0.384605    0.656863    11.00000   -1.50000
H15B  2    0.721078    0.399592    0.555241    11.00000   -1.50000
H15C  2    0.736176    0.319918    0.583422    11.00000   -1.50000
AFIX   0
C16B  1    0.660736    0.428317    0.701716    11.00000    0.09143    0.06824 =
         0.06993   -0.02439    0.02038   -0.02861
AFIX 137
H16A  2    0.635130    0.420736    0.721828    11.00000   -1.50000
H16B  2    0.659410    0.467558    0.656072    11.00000   -1.50000
H16C  2    0.679141    0.441250    0.755296    11.00000   -1.50000
AFIX   0
C017  1    0.756459    0.481733    0.292890    11.00000    0.10359    0.04758 =
         0.08307   -0.03421    0.05131   -0.02996
AFIX  23
H01S  2    0.773626    0.488686    0.243814    11.00000   -1.20000
H01T  2    0.759759    0.523700    0.335436    11.00000   -1.20000
AFIX   0
C17B  1    0.688012    0.276240    0.744856    11.00000    0.05113    0.09716 =
         0.04427    0.01428   -0.00414   -0.01930
AFIX 137
H17A  2    0.702140    0.234945    0.723026    11.00000   -1.50000
H17B  2    0.663786    0.259284    0.765684    11.00000   -1.50000
H17C  2    0.703816    0.299721    0.796516    11.00000   -1.50000
AFIX   0
C18B  1    0.552027    0.322035    0.649658    11.00000    0.07119    0.06079 =
         0.06929    0.01951    0.02710    0.03664
AFIX 137
H18A  2    0.536925    0.359367    0.677185    11.00000   -1.50000
H18B  2    0.536287    0.300051    0.596747    11.00000   -1.50000
H18C  2    0.575111    0.344010    0.628690    11.00000   -1.50000
AFIX   0
C19B  1    0.520493    0.216299    0.775971    11.00000    0.07252    0.05989 =
         0.13914    0.00331    0.06991    0.00846
AFIX 137
H19A  2    0.505081    0.256960    0.794760    11.00000   -1.50000
H19B  2    0.526507    0.183395    0.828548    11.00000   -1.50000
H19C  2    0.505813    0.190206    0.724774    11.00000   -1.50000
AFIX   0
C20B  1    0.590517    0.300240    0.842139    11.00000    0.11203    0.06255 =
         0.05977   -0.02514    0.01258    0.01281
AFIX 137
H20A  2    0.615855    0.318183    0.829435    11.00000   -1.50000
H20B  2    0.593785    0.266851    0.894867    11.00000   -1.50000
H20C  2    0.574335    0.341107    0.856788    11.00000   -1.50000
AFIX   0
PART 1
C21B  1    0.614806    0.109226    0.878914    10.80000    0.10523    0.05744 =
         0.03965    0.01031    0.00099    0.00769
AFIX 137
H21A  2    0.637574    0.140123    0.893187    10.80000   -1.50000
H21B  2    0.620529    0.060408    0.903101    10.80000   -1.50000
H21C  2    0.593082    0.129471    0.907731    10.80000   -1.50000
AFIX   0
PART 0
C022  1    0.814842    0.221907    0.433347    11.00000    0.07165    0.15472 =
         0.05404    0.04977   -0.01996   -0.02776
AFIX  23
H02C  2    0.793802    0.216879    0.473299    11.00000   -1.20000
H02D  2    0.839818    0.220838    0.473361    11.00000   -1.20000
AFIX   0
PART 1
C22B  1    0.641495    0.052489    0.706539    10.80000    0.10960    0.07119 =
         0.07847    0.04267    0.05224    0.06068
AFIX 137
H22A  2    0.635802    0.044192    0.639760    10.80000   -1.50000
H22B  2    0.644111    0.005850    0.738796    10.80000   -1.50000
H22C  2    0.665671    0.079741    0.718829    10.80000   -1.50000
AFIX   0
C23B  1    0.558604    0.042630    0.732197    10.80000    0.07650    0.03627 =
         0.11238    0.01484   -0.02398   -0.00643
AFIX 137
H23A  2    0.536321    0.066629    0.754394    10.80000   -1.50000
H23B  2    0.564413   -0.002057    0.767407    10.80000   -1.50000
H23C  2    0.552647    0.030995    0.666311    10.80000   -1.50000
AFIX   0

PART 0
K003  3    0.500000    0.696060    0.500000    10.50000    0.04355    0.04000 =
         0.04216    0.00000    0.00136    0.00000

K005  3    0.500000    0.220678    0.000000    10.50000    0.04946    0.03682 =
         0.05542    0.00000   -0.01327    0.00000
PART 2
C2    1    0.597844    0.032289    0.651391    10.20000    0.08801    0.01857 =
         0.09126    0.01212   -0.03014   -0.01136
AFIX 137
H2A   2    0.571392    0.031309    0.620135    10.20000   -1.50000
H2C   2    0.604396   -0.015326    0.678510    10.20000   -1.50000
H2D   2    0.615800    0.044254    0.606426    10.20000   -1.50000
AFIX   0
C3    1    0.654023    0.101663    0.795603    10.20000    0.09457    0.06227 =
         0.05633   -0.00279   -0.02406    0.05106
AFIX 137
H3A   2    0.669979    0.108202    0.744877    10.20000   -1.50000
H3C   2    0.659895    0.054731    0.825381    10.20000   -1.50000
H3D   2    0.659565    0.140459    0.841192    10.20000   -1.50000
AFIX   0
C9    1    0.569135    0.080544    0.827881    10.20000    0.05113    0.09716 =
         0.04427    0.01428   -0.00414   -0.01930
AFIX 137
H9A   2    0.574153    0.110269    0.883827    10.20000   -1.50000
H9C   2    0.572596    0.029318    0.844329    10.20000   -1.50000
H9D   2    0.542583    0.088622    0.799570    10.20000   -1.50000
AFIX   0

RESI Cro 1
PART 0
PART -1
O1    6    0.567489    0.172121    0.107860    10.50000    0.05940    0.07826 =
         0.03508    0.00514   -0.00263    0.01838
O2    6    0.512494    0.074270    0.037234    10.50000    0.06794    0.03697 =
         0.07978   -0.00525    0.02453   -0.00139
O3    6    0.455138    0.119341   -0.095662    10.50000    0.05008    0.09367 =
         0.05718   -0.01048    0.00273   -0.02946
O4    6    0.433927    0.265578   -0.102657    10.50000    0.05612    0.14011 =
         0.05060    0.02584    0.01228    0.04538
O5    6    0.489834    0.367297   -0.027506    10.50000    0.13408    0.05210 =
         0.07798    0.01858    0.04983    0.04475
O6    6    0.550324    0.319138    0.104425    10.50000    0.06825    0.05579 =
         0.06470   -0.02654    0.02925   -0.03812
C1    1    0.564668    0.102625    0.147940    10.50000    0.07897    0.08544 =
         0.06585    0.03572    0.01237    0.04504
AFIX  23
H1A   2    0.547187    0.104237    0.197042    10.50000   -1.20000
H1B   2    0.590423    0.086061    0.175844    10.50000   -1.20000
AFIX   0
C2    1    0.549547    0.053913    0.074809    10.50000    0.08004    0.07793 =
         0.07933    0.02217    0.04099    0.04230
AFIX  23
H2A   2    0.566918    0.053871    0.025434    10.50000   -1.20000
H2B   2    0.548788    0.004130    0.099775    10.50000   -1.20000
AFIX   0
C3    1    0.496719    0.028195   -0.033089    10.50000    0.11736    0.04512 =
         0.09367   -0.01466    0.04023   -0.01926
AFIX  23
H3A   2    0.497174   -0.022080   -0.009378    10.50000   -1.20000
H3B   2    0.512815    0.029912   -0.084961    10.50000   -1.20000
AFIX   0
C4    1    0.457825    0.047416   -0.066738    10.50000    0.10760    0.04773 =
         0.13372   -0.04830    0.02782   -0.03243
AFIX  23
H4A   2    0.448483    0.015483   -0.119286    10.50000   -1.20000
H4B   2    0.441035    0.039798   -0.017031    10.50000   -1.20000
AFIX   0
C5    1    0.418426    0.144363   -0.132274    10.50000    0.04370    0.15980 =
         0.04896   -0.02565   -0.00143   -0.00841
AFIX  23
H5A   2    0.401049    0.141461   -0.083038    10.50000   -1.20000
H5B   2    0.408096    0.111131   -0.182557    10.50000   -1.20000
AFIX   0
C6    1    0.416894    0.217207   -0.168492    10.50000    0.05042    0.19980 =
         0.09057    0.02017   -0.04555    0.00964
AFIX  23
H6A   2    0.430554    0.219237   -0.224559    10.50000   -1.20000
H6B   2    0.389638    0.231219   -0.186420    10.50000   -1.20000
AFIX   0
C7    1    0.434962    0.338471   -0.133052    10.50000    0.08798    0.14773 =
         0.09752    0.05234    0.00709    0.08756
AFIX  23
H7A   2    0.408177    0.354444   -0.152990    10.50000   -1.20000
H7B   2    0.449351    0.340353   -0.187949    10.50000   -1.20000
AFIX   0
C8    1    0.452578    0.389458   -0.064315    10.50000    0.17935    0.11380 =
         0.13743    0.02515    0.01947    0.09900
AFIX  23
H8A   2    0.454158    0.437709   -0.093303    10.50000   -1.20000
H8B   2    0.436067    0.393905   -0.013488    10.50000   -1.20000
AFIX   0
C9    1    0.509371    0.414233    0.040879    10.50000    0.18211    0.02997 =
         0.10324   -0.00487    0.07522    0.01092
AFIX  23
H9A   2    0.495903    0.414199    0.097301    10.50000   -1.20000
H9B   2    0.509487    0.464354    0.016780    10.50000   -1.20000
AFIX   0
C10   1    0.548899    0.388445    0.063056    10.50000    0.13920    0.04403 =
         0.07855   -0.02877    0.07855   -0.04392
AFIX  23
H10A  2    0.561641    0.386502    0.005594    10.50000   -1.20000
H10B  2    0.563395    0.423127    0.105831    10.50000   -1.20000
AFIX   0
C11   1    0.587389    0.291156    0.132890    10.50000    0.05043    0.12109 =
         0.06919   -0.02944    0.01565   -0.03664
AFIX  23
H11A  2    0.601537    0.324427    0.178205    10.50000   -1.20000
H11B  2    0.602147    0.286931    0.078814    10.50000   -1.20000
AFIX   0
C12   1    0.583907    0.219640    0.175346    10.50000    0.04122    0.13678 =
         0.02329   -0.00712    0.01449    0.00081
AFIX  23
H12A  2    0.609726    0.201915    0.201171    10.50000   -1.20000
H12B  2    0.567465    0.222973    0.226435    10.50000   -1.20000
AFIX   0

RESI CRO 2
PART 0
PART -2
O1    6    0.474196    0.565583    0.423960    20.50000    0.05198    0.03609 =
         0.04868   -0.01496    0.01084   -0.00700
O2    6    0.431899    0.695622    0.374150    20.50000    0.09264    0.06276 =
         0.03274    0.00392   -0.03021    0.00025
O3    6    0.467494    0.828306    0.428747    20.50000    0.05886    0.03201 =
         0.03432   -0.00342    0.01224    0.01281
O4    6    0.531140    0.822575    0.562936    20.50000    0.10461    0.05263 =
         0.07649   -0.02565   -0.01196   -0.00085
O5    6    0.569306    0.693833    0.612226    20.50000    0.05472    0.09967 =
         0.03188   -0.00692    0.01931   -0.01052
O6    6    0.532205    0.570011    0.572270    20.50000    0.07159    0.05147 =
         0.05873    0.00086    0.01110    0.01506
C1    1    0.435273    0.561993    0.384160    20.50000    0.05777    0.05729 =
         0.04936   -0.01627    0.00480   -0.03527
AFIX  23
H1A   2    0.417797    0.559549    0.433222    20.50000   -1.20000
H1B   2    0.431054    0.518449    0.344572    20.50000   -1.20000
AFIX   0
C2    1    0.427692    0.627804    0.328535    20.50000    0.05641    0.07585 =
         0.03341   -0.01077   -0.01401   -0.01649
AFIX  23
H2A   2    0.445139    0.627410    0.279323    20.50000   -1.20000
H2B   2    0.400928    0.624763    0.297484    20.50000   -1.20000
AFIX   0
C3    1    0.421959    0.764012    0.338026    20.50000    0.06157    0.07012 =
         0.05110    0.01883   -0.01560    0.00220
AFIX  23
H3A   2    0.394348    0.762977    0.312730    20.50000   -1.20000
H3B   2    0.437091    0.773024    0.285497    20.50000   -1.20000
AFIX   0
C4    1    0.427823    0.824835    0.401530    20.50000    0.05540    0.05390 =
         0.05525    0.02014    0.00983    0.01608
AFIX  23
H4A   2    0.418597    0.870284    0.370349    20.50000   -1.20000
H4B   2    0.413600    0.817210    0.455949    20.50000   -1.20000
AFIX   0
C5    1    0.475643    0.889809    0.483729    20.50000    0.09885    0.03384 =
         0.02868   -0.00970    0.02411    0.00630
AFIX  23
H5A   2    0.459596    0.890322    0.535733    20.50000   -1.20000
H5B   2    0.470182    0.934287    0.446513    20.50000   -1.20000
AFIX   0
C6    1    0.516242    0.886192    0.518526    20.50000    0.10538    0.04452 =
         0.08148   -0.01495   -0.00537   -0.01939
AFIX  23
H6A   2    0.531170    0.895441    0.465696    20.50000   -1.20000
H6B   2    0.521731    0.926725    0.562645    20.50000   -1.20000
AFIX   0
C7    1    0.568319    0.815179    0.612019    20.50000    0.09686    0.09699 =
         0.05837   -0.02240   -0.01046   -0.01868
AFIX  23
H7A   2    0.572636    0.858545    0.651896    20.50000   -1.20000
H7B   2    0.586981    0.818184    0.565636    20.50000   -1.20000
AFIX   0
C8    1    0.579527    0.752944    0.670216    20.50000    0.05630    0.10535 =
         0.05294   -0.01836    0.00814   -0.00448
AFIX  23
H8A   2    0.607634    0.753282    0.690534    20.50000   -1.20000
H8B   2    0.565354    0.752059    0.725507    20.50000   -1.20000
AFIX   0
C9    1    0.574589    0.640288    0.682066    20.50000    0.03833    0.11300 =
         0.04368    0.00744    0.01794   -0.00598
AFIX  23
H9A   2    0.555784    0.646128    0.727717    20.50000   -1.20000
H9B   2    0.601113    0.641777    0.714753    20.50000   -1.20000
AFIX   0
C10   1    0.567787    0.573742    0.629691    20.50000    0.06904    0.10445 =
         0.04319    0.01482    0.01507    0.00931
AFIX  23
H10A  2    0.588983    0.567302    0.590482    20.50000   -1.20000
H10B  2    0.569046    0.532748    0.673823    20.50000   -1.20000
AFIX   0
C11   1    0.525420    0.505449    0.522717    20.50000    0.07391    0.02560 =
         0.07002    0.00901    0.03369    0.01868
AFIX  23
H11A  2    0.529360    0.463734    0.565532    20.50000   -1.20000
H11B  2    0.543912    0.501070    0.476097    20.50000   -1.20000
AFIX   0
C12   1    0.486110    0.504651    0.476694    20.50000    0.08628    0.04011 =
         0.10892    0.00975    0.00424   -0.00881
AFIX  23
H12A  2    0.483214    0.461744    0.435660    20.50000   -1.20000
H12B  2    0.468310    0.498206    0.524521    20.50000   -1.20000
AFIX   0

RESI CRO 3
PART 0
PART -3
O1    6    0.454854    0.611521    0.375970   -20.50000    0.04857    0.05937 =
         0.04157   -0.00479    0.01938   -0.00700
O2    6    0.505203    0.545277    0.516627   -20.50000    0.06349    0.04780 =
         0.04040   -0.00824    0.01427    0.00447
O3    6    0.563445    0.627712    0.611067   -20.50000    0.06166    0.06250 =
         0.03414    0.02369    0.00644    0.00377
O4    6    0.555687    0.778921    0.610503   -20.50000    0.03182    0.04100 =
         0.07101    0.00658    0.00001   -0.01619
O5    6    0.500761    0.844532    0.481696   -20.50000    0.05045    0.04899 =
         0.02941    0.00455   -0.00618    0.00211
O6    6    0.440642    0.758572    0.397671   -20.50000    0.06406    0.04364 =
         0.02295    0.00357   -0.00558   -0.00515
C1    1    0.454351    0.538140    0.399990   -20.50000    0.09150    0.05759 =
         0.04637    0.00003    0.00449   -0.00603
AFIX  23
H1A   2    0.443084    0.509143    0.346279   -20.50000   -1.20000
H1B   2    0.438374    0.530929    0.451380   -20.50000   -1.20000
AFIX   0
C2    1    0.494009    0.515026    0.428458   -20.50000    0.09300    0.04915 =
         0.03963   -0.00670    0.00705   -0.00966
AFIX  23
H2A   2    0.495462    0.461541    0.431552   -20.50000   -1.20000
H2B   2    0.511292    0.532196    0.383482   -20.50000   -1.20000
AFIX   0
C3    1    0.541348    0.522945    0.560978   -20.50000    0.06121    0.07240 =
         0.04662    0.01935    0.01742    0.00346
AFIX  23
H3A   2    0.561476    0.531604    0.519348   -20.50000   -1.20000
H3B   2    0.540597    0.470351    0.573762   -20.50000   -1.20000
AFIX   0
C4    1    0.551372    0.562015    0.647795   -20.50000    0.05108    0.05903 =
         0.05364    0.02984   -0.00292    0.00955
AFIX  23
H4A   2    0.528763    0.568664    0.682474   -20.50000   -1.20000
H4B   2    0.572490    0.537983    0.687902   -20.50000   -1.20000
AFIX   0
C5    1    0.582404    0.671992    0.680347   -20.50000    0.03696    0.06946 =
         0.04293    0.00971    0.00215    0.01776
AFIX  23
H5A   2    0.607080    0.649099    0.705539   -20.50000   -1.20000
H5B   2    0.566166    0.677246    0.731593   -20.50000   -1.20000
AFIX   0
C6    1    0.590050    0.743083    0.643291   -20.50000    0.04526    0.06193 =
         0.04161   -0.00783   -0.00685    0.00403
AFIX  23
H6A   2    0.604584    0.772621    0.692365   -20.50000   -1.20000
H6B   2    0.606278    0.737641    0.592053   -20.50000   -1.20000
AFIX   0
C7    1    0.560982    0.848023    0.570945   -20.50000    0.04299    0.05116 =
         0.02400   -0.00421   -0.00293   -0.01944
AFIX  23
H7A   2    0.572964    0.842507    0.512756   -20.50000   -1.20000
H7B   2    0.578375    0.877807    0.614332   -20.50000   -1.20000
AFIX   0
C8    1    0.523340    0.883711    0.551847   -20.50000    0.04814    0.06055 =
         0.02111    0.01417    0.00145   -0.01333
AFIX  23
H8A   2    0.510194    0.884965    0.608740   -20.50000   -1.20000
H8B   2    0.526848    0.934135    0.531278   -20.50000   -1.20000
AFIX   0
C9    1    0.462804    0.870170    0.457400   -20.50000    0.05973    0.04034 =
         0.04791    0.00666   -0.02277    0.00191
AFIX  23
H9A   2    0.463644    0.922681    0.444138   -20.50000   -1.20000
H9B   2    0.447654    0.863259    0.510372   -20.50000   -1.20000
AFIX   0
C10   1    0.443634    0.832580    0.376398   -20.50000    0.05973    0.04034 =
         0.04791    0.00666   -0.02277    0.00191
AFIX  23
H10A  2    0.417577    0.853245    0.359310   -20.50000   -1.20000
H10B  2    0.458733    0.838648    0.323181   -20.50000   -1.20000
AFIX   0
C11   1    0.423533    0.713502    0.326940   -20.50000    0.04345    0.06298 =
         0.03482   -0.00651   -0.00427   -0.01175
AFIX  23
H11A  2    0.440131    0.713133    0.275996   -20.50000   -1.20000
H11B  2    0.398349    0.734683    0.302209   -20.50000   -1.20000
AFIX   0
C12   1    0.417196    0.639062    0.354153   -20.50000    0.05216    0.05923 =
         0.03779   -0.01070   -0.00127   -0.00487
AFIX  23
H12A  2    0.402556    0.637167    0.408628   -20.50000   -1.20000
H12B  2    0.402929    0.611536    0.302680   -20.50000   -1.20000
AFIX   0
HKLF 4


REM  pimx4_a.res in C2
REM wR2 = 0.0786, GooF = S = 0.911, Restrained GooF = 0.890 for all data
REM R1 = 0.0368 for 16849 Fo > 4sig(Fo) and 0.0512 for all 21354 data
REM 1270 parameters refined using 1546 restraints

END

WGHT      0.0442      0.0000

REM Highest difference peak  0.816,  deepest hole -0.209,  1-sigma level  0.045
Q1    1   0.8899  0.2041  0.9227  11.00000  0.05    0.82
Q2    1   0.6466  0.2210  0.6045  11.00000  0.05    0.44
Q3    1   0.9093  0.1031  0.7540  11.00000  0.05    0.41
Q4    1   0.8726  0.3408  1.0522  11.00000  0.05    0.40
Q5    1   0.6031  0.1530  0.7571  11.00000  0.05    0.35
Q6    1   0.8284  0.3276  0.8649  11.00000  0.05    0.34
Q7    1   0.6644  0.3795  0.6294  11.00000  0.05    0.33
Q8    1   0.5178  0.7215  0.4999  11.00000  0.05    0.32
Q9    1   0.6654  0.3277  0.4330  11.00000  0.05    0.32
Q10   1   0.8254  0.3899  0.4208  11.00000  0.05    0.30
Q11   1   0.5591  0.2783  0.6852  11.00000  0.05    0.29
Q12   1   0.6169  0.2215  0.5939  11.00000  0.05    0.28
Q13   1   0.9431  0.2565  0.7571  11.00000  0.05    0.28
Q14   1   0.6728  0.1393  0.4398  11.00000  0.05    0.27
Q15   1   0.9201  0.1909  0.8024  11.00000  0.05    0.26
Q16   1   0.7678  0.2947  0.2659  11.00000  0.05    0.26
Q17   1   0.7522  0.2625  0.2823  11.00000  0.05    0.26
Q18   1   0.9266  0.2899  0.7774  11.00000  0.05    0.26
Q19   1   0.8987  0.1795  0.7802  11.00000  0.05    0.26
Q20   1   0.6905  0.3921  0.1008  11.00000  0.05    0.25
;
_shelx_res_checksum              196
_shelx_hkl_file                  
;
 -35 -13   9    5.20    3.32   0
 -35 -11  12    3.37    3.25   0
 -34 -14   7    5.85    2.80   0
 -34 -10  11    5.22    2.73   0
 -34 -10  12    2.44    3.19   0
 -34 -10  13    5.07    3.27   0
 -33 -15   5    3.71    3.06   0
 -33 -11   8    4.26    2.95   0
 -33  -9  11    0.66    2.90   0
 -33  -9  12    5.67    3.09   0
 -33  -9  13    6.58    2.95   0
 -33  -9  14   -1.69    3.44   0
 -32 -16   4    2.99    3.06   0
 -32 -12   6   -0.47    2.48   0
 -32 -10   8   19.13    1.92   0
 -32  -8  11   36.65    3.08   0
 -32  -8  13    1.26    2.85   0
 -32  -8  15    8.53    3.62   0
 -31  -7  11    3.37    2.58   0
 -31  -7  12    2.71    2.92   0
 -31  -7  14    8.91    3.24   0
 -31  -7  15    1.04    3.33   0
 -30 -14   3    1.37    2.69   0
 -30 -12   4   34.33    2.70   0
 -30  -6  13    4.95    2.89   0
 -30  -6  14    1.89    2.67   0
 -29 -19   1    3.48    3.74   0
 -29 -15   2   13.97    2.79   0
 -29  -7   8    5.44    1.81   0
 -28 -16   1    5.40    2.86   0
 -28  -6   8   16.65    2.44   0
 -27  -5   9    8.97    1.73   0
 -26  -6   6    2.29    1.56   0
 -26  -4   9   16.21    2.31   0
 -26  -4  10  130.44    2.20   0
 -26  -4  16   10.04    2.85   0
 -26  -4  17   -0.06    3.09   0
 -25 -11   1    2.99    2.57   0
 -25  -7   4   41.16    1.75   0
 -25  -5   6   14.18    2.15   0
 -25  -3  10   13.95    2.09   0
 -25  -3  11    5.90    2.24   0
 -25  -3  12   14.38    1.70   0
 -25  -3  15   15.37    2.88   0
 -24 -10   1   22.55    2.28   0
 -24  -6   4    4.67    1.97   0
 -23 -11   0   58.74    2.72   0
 -23  -9   1    2.24    2.10   0
 -23  -3  18    2.38    3.38   0
 -22 -10   0   12.37    2.31   0
 -22  -4   5   15.35    1.52   0
 -22  -2   9   76.17    2.01   0
 -22  -2  17    0.94    3.11   0
 -21 -11  -1    1.31    2.67   0
 -21  -9   0   13.75    2.62   0
 -21  -5   3  252.34    3.35   0
 -21  -1  10    8.92    2.15   0
 -21  -1  11   20.93    1.59   0
 -21  -1  13   43.82    1.92   0
 -21  -1  14    3.92    1.87   0
 -21  -1  15   39.65    2.86   0
 -20 -10  -1   38.42    2.99   0
 -20  -2  19   -2.49    3.60   0
 -19  -5   2   34.97    1.79   0
 -19  -3   4   35.17    2.24   0
 -18   0   9   16.48    2.24   0
 -17  -1  19   15.55    3.15   0
 -16   0   7    0.11    1.45   0
 -16   0  18    0.66    3.17   0
 -15   1   9    7.63    1.41   0
 -14   0  19   -0.62    3.02   0
 -13  -3   1  970.13    6.72   0
 -13   1  18    4.28    3.04   0
 -12   0   4  746.97    5.42   0
 -12   2   9    2.10    1.47   0
 -11 -13  -5   26.30    5.00   0
 -11   1  19    0.16    3.30   0
 -10  -4  -1   86.18    3.50   0
 -10   2   7    0.33    1.49   0
 -10   2  17   -0.21    2.03   0
  -9   1  20    2.35    3.55   0
  -9   3   9   70.38    2.32   0
  -9   3  10    0.55    1.37   0
  -9   3  14    3.42    2.25   0
  -9   3  15   27.95    2.50   0
  -8 -14  -6   44.26    3.76   0
  -7 -13  -6   13.67    2.89   0
  -7   3  16    6.63    2.57   0
  -6 -18  -7    1.69    3.38   0
  -6   2  19    8.22    3.00   0
  -4   0   1    4.02    2.00   0
  -4   2  20    1.89    3.62   0
  -4   4   9   14.65    2.15   0
  -4   4  14    0.39    2.23   0
  -4   4  15    2.37    2.29   0
  -3   3  18    2.50    2.74   0
  -1 -21  -8    2.46    3.49   0
  -1 -19  -8    4.75    2.78   0
  -1   3  19   13.00    3.61   0
   0 -18  -8    9.24    3.04   0
   0 -12  -7   10.06    2.26   0
   1   3   4   57.66    3.14   0
   1   3  19    2.17    3.44   0
   1   5  11    7.95    2.43   0
   1   5  12    4.03    2.38   0
   2   4  17    1.46    2.86   0
   3   5  13   21.44    2.41   0
   3   5  14    4.76    2.74   0
   4 -14  -8   41.39    2.54   0
   4  -4  -4  464.31    5.18   0
   6   4  18    3.63    3.74   0
   7 -21  -9    5.04    2.89   0
   7 -13  -8    3.82    2.42   0
   7  -7  -6   28.99    2.37   0
   7  -1  -2  350.85    5.28   0
   7   5  15    3.15    3.02   0
   8 -22  -9   -0.08    3.38   0
   8 -20  -9    2.03    2.92   0
   8   4  18    2.44    3.55   0
   9 -21  -9    4.18    3.36   0
   9 -19  -9    9.08    2.84   0
   9   5  15    3.21    3.01   0
  10 -22  -9   10.70    3.64   0
  10 -18  -9   -0.80    2.63   0
  10 -12  -8   39.52    2.38   0
  10   4  18    7.40    3.58   0
  11 -17  -9    4.48    2.56   0
  11   5  15    7.75    3.14   0
  12 -16  -9    6.87    2.39   0
  12   2   1  223.42    4.50   0
  12   4  18    6.91    3.97   0
  13 -17  -9   21.40    2.51   0
  13  -3  -4    6.42    2.11   0
  13   5  15    3.31    3.57   0
  14 -16  -9   13.94    2.63   0
  15 -11  -8    3.34    1.66   0
  15  -3  -4   75.24    2.52   0
  16 -16  -9    8.62    2.68   0
  17 -11  -8   23.23    1.82   0
  17  -3  -4    4.60    2.00   0
  17   5  14   -0.16    4.18   0
  18 -16  -9    1.62    2.66   0
  18   4  17    9.73    4.73   0
  19 -17  -9   17.09    2.71   0
  19  -3  -4   32.61    1.77   0
  19   5  13    5.75    5.76   0
  20 -16  -9    3.28    2.43   0
  21 -17  -9    6.42    2.93   0
  21  -9  -7   -0.21    2.00   0
  21  -1  -2   45.17    2.29   0
  21   1   0   21.04    2.22   0
  22 -18  -9   16.28    2.81   0
  22 -16  -9    3.02    2.06   0
  22 -12  -8    1.32    2.44   0
  22   0  -1    6.12    2.18   0
  22   4   6    1.59    2.92   0
  23 -19  -9    1.36    3.06   0
  23 -17  -9    2.38    2.75   0
  23  -9  -7   12.44    2.16   0
  23  -5  -5  277.77    3.22   0
  23  -1  -2   -0.28    1.57   0
  24 -18  -9    2.79    3.19   0
  24 -12  -8    5.65    1.82   0
  24   4   7   41.04    3.51   0
  25 -19  -9    2.85    3.27   0
  25 -13  -8   21.17    2.46   0
  25  -7  -6   27.70    1.73   0
  26 -10  -7    7.69    2.27   0
  26   4   9    4.39    3.86   0
  27 -13  -8   10.77    1.93   0
  27   3   5   10.68    2.46   0
  28 -14  -8    3.21    2.73   0
  28 -10  -7    4.33    1.66   0
  28  -6  -5   45.11    2.40   0
  28  -2  -2   11.80    2.18   0
  28   0   0   36.16    2.20   0
  29 -15  -8    0.08    2.68   0
  29 -11  -7    5.13    2.39   0
  30   2   4    5.81    2.41   0
  31 -17  -8    3.45    2.90   0
  31 -15  -8    0.68    2.29   0
  31  -9  -6    5.86    2.37   0
  31  -7  -5   62.97    2.53   0
  31   3   9    6.15    3.39   0
  31   3  10   15.74    3.69   0
  31   3  11    3.65    3.91   0
  32 -16  -8    4.34    2.33   0
  32 -12  -7   10.28    2.47   0
  32  -4  -3   10.11    1.66   0
  32  -2  -1    0.14    2.38   0
  33 -13  -7    1.39    2.81   0
  34 -14  -7    7.01    2.90   0
  34 -10  -6    4.17    1.87   0
  34  -8  -5    9.12    2.30   0
  34  -6  -4   16.34    1.77   0
  34   0   2    0.98    2.29   0
  34   2   7    2.65    2.77   0
  35 -15  -7    2.58    3.06   0
  35 -11  -6    7.72    2.66   0
  35  -5  -3   14.66    1.81   0
  35  -3  -1   12.84    2.49   0
  35   1   5    1.09    2.96   0
  37  -1   2    5.69    2.72   0
  37   1   7   12.61    3.41   0
  38 -10  -5    9.34    2.67   0
  38  -8  -4   -1.04    2.56   0
  38  -4  -1   18.07    2.71   0
  38  -2   1    3.27    2.55   0
  38   0   5   13.86    3.06   0
  39 -11  -5    5.68    3.09   0
  39  -9  -4   10.49    2.63   0
  39  -7  -3    2.47    2.75   0
  40 -12  -5    2.93    3.00   0
  40  -6  -2    7.67    2.87   0
  40  -4   0   11.98    2.54   0
  40   0   7    0.98    3.12   0
  40   0   8    0.77    3.83   0
  42  -6  -1    4.56    3.02   0
  42  -4   1    2.44    2.72   0
  42  -2   4    2.18    2.90   0
  43 -11  -4    7.03    2.62   0
  43  -9  -3    3.61    2.30   0
  43  -3   3    5.78    3.19   0
  44 -10  -3    1.59    3.07   0
  44  -6   0    2.52    3.26   0
  44  -4   2    1.98    3.26   0
  45  -9  -2    2.54    3.14   0
  46  -6   1    0.27    3.55   0
 -36 -14   9    3.46    3.21   0
 -36 -12  11   10.09    3.53   0
 -35 -15   7    1.52    3.08   0
 -35 -13   8    6.79    3.19   0
 -35 -11  10    1.91    2.91   0
 -35 -11  11    5.28    3.01   0
 -34 -16   5    7.42    3.49   0
 -34 -14   6    2.66    3.06   0
 -34 -10  10    4.52    3.06   0
 -33 -17   4    0.75    3.35   0
 -33 -11   7   -1.04    2.73   0
 -33  -9  10    7.80    2.63   0
 -32 -18   3   11.52    3.81   0
 -32 -14   4    0.33    3.07   0
 -32 -10   7    6.64    2.50   0
 -32  -8  10    6.11    2.52   0
 -31 -15   3    1.35    2.83   0
 -31 -13   4   17.05    2.52   0
 -31 -11   5   12.94    2.70   0
 -31  -9   7   12.04    2.35   0
 -30 -16   2    1.61    3.31   0
 -30 -10   5    4.58    2.17   0
 -30  -8   7    0.67    2.32   0
 -30  -6  11    6.12    2.01   0
 -30  -6  15    4.96    2.38   0
 -30  -6  16    8.69    3.41   0
 -29  -9   5    5.82    2.14   0
 -29  -7   7   29.19    2.48   0
 -29  -5  12   27.64    2.42   0
 -29  -5  13    4.94    1.93   0
 -29  -5  14   -1.25    2.55   0
 -29  -5  15    8.00    3.04   0
 -29  -5  16   -1.81    2.99   0
 -28  -8   5   12.05    2.27   0
 -28  -6   7    5.30    2.31   0
 -28  -4  12   31.61    2.36   0
 -28  -4  13    5.74    2.57   0
 -28  -4  14    6.88    2.66   0
 -27 -17   0    4.25    3.47   0
 -27  -7   5   63.14    2.61   0
 -27  -5   8   15.68    1.64   0
 -26 -12   1   30.17    2.54   0
 -26  -4   8   22.65    2.23   0
 -25 -17  -1   25.18    3.61   0
 -25 -13   0   73.74    3.35   0
 -25  -3   9   88.23    2.49   0
 -25  -3  16    6.08    2.38   0
 -25  -3  17    6.52    3.28   0
 -24  -8   2   66.60    2.52   0
 -24  -4   6   -0.72    2.03   0
 -24  -2  11   20.42    2.37   0
 -24  -2  12   41.70    1.87   0
 -24  -2  14    7.84    1.75   0
 -24  -2  15    6.35    2.79   0
 -24  -2  16   11.78    2.68   0
 -23 -13  -1   14.29    2.83   0
 -23  -5   4   10.44    1.99   0
 -23  -3   7  114.18    2.23   0
 -22 -12  -1   20.02    2.71   0
 -22  -8   1   20.92    2.28   0
 -22  -2   8    3.73    1.60   0
 -22  -2  18    6.06    3.18   0
 -21 -21  -3    2.18    6.02   0
 -21  -3   5   93.51    2.48   0
 -21  -1   9   31.72    2.28   0
 -21  -1  16    3.59    2.16   0
 -21  -1  17    9.30    2.98   0
 -20 -16  -3    6.33    4.23   0
 -20  -8   0   36.98    2.48   0
 -20  -2   6  103.23    2.09   0
 -20   0  11   29.83    2.19   0
 -20   0  12    0.65    2.28   0
 -20   0  13    1.69    2.31   0
 -20   0  14   16.84    2.49   0
 -20   0  15    1.95    2.35   0
 -19  -9  -1   54.14    3.07   0
 -19  -1   7   29.61    1.59   0
 -19  -1  19    3.72    3.13   0
 -18   0   8   24.62    2.10   0
 -18   0  17    9.98    2.66   0
 -17   1  10    0.41    2.24   0
 -17   1  11   23.99    1.69   0
 -17   1  12   12.14    1.62   0
 -17   1  13   22.83    1.78   0
 -17   1  14   12.31    1.89   0
 -17   1  15   34.11    2.73   0
 -16   0  19    6.80    3.39   0
 -15   1   8    6.46    1.51   0
 -15   1  17   13.13    2.62   0
 -14 -18  -5   10.90    5.84   0
 -14   0   5    9.06    1.57   0
 -14   2  10   93.00    2.48   0
 -14   2  11   33.13    1.87   0
 -14   2  12    7.67    1.57   0
 -14   2  13    1.13    1.64   0
 -14   2  14   25.46    2.36   0
 -13  -1   3   63.41    2.54   0
 -13   1   6   26.63    2.22   0
 -13   1  19    0.09    2.92   0
 -12   2  17   17.57    2.90   0
 -11   3  11   64.76    2.43   0
 -11   3  12  104.66    2.76   0
 -11   3  13   63.38    2.70   0
 -11   3  14    6.64    2.28   0
 -10   0   3  131.13    2.87   0
 -10   2  18    5.72    2.79   0
  -9   1   4  317.72    4.08   0
  -9   3  16    3.06    2.69   0
  -8  -2   0  613.67    7.71   0
  -8   2  19    0.69    3.27   0
  -7   3   7  333.81    3.91   0
  -7   3  17   28.81    2.68   0
  -6 -22  -7    6.26    4.02   0
  -6 -20  -7    2.53    3.60   0
  -6   2  20    4.15    3.30   0
  -6   4  10  132.26    2.74   0
  -6   4  11   11.99    2.18   0
  -6   4  12   18.25    1.74   0
  -6   4  13    7.20    2.12   0
  -6   4  14   22.04    2.47   0
  -5 -17  -7   14.40    3.32   0
  -5  -5  -3  700.13   13.65   0
  -5   3   6   13.29    2.17   0
  -5   3  18    6.96    3.01   0
  -4   4  16   28.35    2.57   0
  -3   3   5  432.21    5.00   0
  -3   3  19    2.47    2.97   0
  -2 -10  -6   24.84    2.36   0
  -2   2   3  108.59    3.91   0
  -2   4  17    2.74    3.08   0
  -1 -13  -7    2.68    2.51   0
   0 -22  -8    4.22    3.25   0
   0 -20  -8    9.78    3.37   0
   0   4  17    2.09    2.59   0
   1 -23  -8    4.46    4.01   0
   1 -17  -8   34.00    2.81   0
   1   5  10   52.63    2.62   0
   1   5  13    3.41    2.30   0
   1   5  14   23.65    2.78   0
   2 -16  -8   12.10    2.42   0
   2   4  18    0.59    3.38   0
   3 -11  -7   67.07    2.67   0
   3   5   9   27.83    2.34   0
   3   5  15   26.94    2.98   0
   4  -8  -6  202.73    3.47   0
   4   4  18   22.16    3.36   0
   5   5   8    4.21    2.35   0
   5   5  15    8.75    2.69   0
   6 -14  -8   51.55    2.42   0
   6 -10  -7    1.13    2.13   0
   9 -13  -8  100.24    2.75   0
   9  -5  -5   42.44    1.90   0
  10 -20  -9    6.08    3.04   0
  10  -2  -3   43.65    2.01   0
  11 -21  -9   -0.11    3.25   0
  11 -19  -9    3.17    2.89   0
  11   5   7   13.44    4.32   0
  12 -22  -9    1.95    3.41   0
  12 -20  -9    2.70    3.00   0
  12 -18  -9    6.74    2.78   0
  12 -12  -8   16.81    2.21   0
  12  -2  -3   36.74    2.38   0
  13 -21  -9   -0.13    3.32   0
  13 -19  -9   10.02    2.91   0
  14 -20  -9   11.72    2.89   0
  14 -18  -9   20.32    2.78   0
  14 -12  -8   10.91    2.32   0
  14  -2  -3   90.75    2.76   0
  14   4  18    1.65    4.23   0
  15 -21  -9    2.04    3.03   0
  15 -19  -9    2.17    2.99   0
  15 -17  -9    3.23    2.47   0
  15  -9  -7    2.12    1.95   0
  15   5  15    5.88    3.66   0
  16 -20  -9    1.20    2.85   0
  16 -18  -9    4.36    2.84   0
  17 -21  -9   -1.39    3.17   0
  17 -19  -9    7.22    3.03   0
  17 -17  -9   21.63    2.61   0
  17  -9  -7   54.56    2.32   0
  17  -5  -5   86.00    2.39   0
  18 -20  -9    0.38    2.97   0
  18 -18  -9    3.87    2.93   0
  18 -12  -8   13.68    2.29   0
  18  -2  -3   98.10    2.65   0
  18   4   5  277.76    5.47   0
  19 -21  -9    1.43    3.50   0
  19 -19  -9   15.20    3.20   0
  19  -9  -7   20.50    2.13   0
  19  -7  -6    9.97    2.01   0
  19  -5  -5  156.58    2.79   0
  19  -1  -2  119.37    2.86   0
  19   3   3   83.80    2.84   0
  20 -20  -9    5.54    3.32   0
  20 -18  -9    1.38    2.71   0
  21 -19  -9    4.64    2.91   0
  21 -13  -8   19.83    2.41   0
  21  -7  -6   23.17    2.32   0
  21  -5  -5   51.11    1.76   0
  22 -20  -9    4.71    3.18   0
  23 -13  -8   28.28    2.63   0
  23   3   4   69.62    3.24   0
  24 -10  -7    2.85    2.36   0
  24  -4  -4   11.86    2.10   0
  25  -3  -3   54.39    2.26   0
  25   1   1   87.03    2.67   0
  26 -14  -8    1.47    2.55   0
  26  -8  -6    4.20    2.12   0
  26  -6  -5   21.42    2.24   0
  26  -2  -2   32.77    2.12   0
  26   4  10    1.70    3.92   0
  26   4  11    3.40    4.57   0
  27 -15  -8   14.06    2.91   0
  27 -11  -7   14.77    2.38   0
  27  -1  -1  320.84    3.47   0
  28 -16  -8    2.01    2.66   0
  29 -17  -8    2.14    2.88   0
  29  -9  -6    2.46    2.23   0
  29  -7  -5    4.93    2.36   0
  29  -5  -4    1.41    1.47   0
  29   3   7   14.47    2.91   0
  30 -18  -8   11.12    3.58   0
  30 -16  -8    2.19    2.26   0
  30 -12  -7   51.66    2.65   0
  31 -13  -7    3.44    2.80   0
  31  -3  -2    9.18    2.20   0
  32 -10  -6    1.60    2.21   0
  32  -8  -5    4.20    2.25   0
  32  -6  -4   20.11    2.19   0
  32   2   6    4.63    2.87   0
  33 -11  -6   33.91    2.46   0
  33  -5  -3   14.24    2.32   0
  33   1   4    4.50    2.50   0
  34  -4  -2   15.35    2.53   0
  34   2   8    2.45    3.30   0
  34   2   9    7.75    3.89   0
  34   2  11    3.06    4.45   0
  34   2  12    0.33    4.65   0
  35  -9  -5    1.41    1.84   0
  36 -12  -6    2.25    2.02   0
  36 -10  -5    4.59    2.52   0
  36  -8  -4   10.15    2.39   0
  36  -6  -3    7.14    2.33   0
  37 -13  -6   12.13    2.35   0
  37  -5  -2    2.14    1.80   0
  37   1   8    4.01    3.45   0
  38 -14  -6    5.22    3.05   0
  39  -5  -1    9.39    2.59   0
  39  -3   1    9.77    2.82   0
  40 -10  -4    7.91    2.87   0
  40  -8  -3   10.30    2.74   0
  40  -2   3   -0.26    2.77   0
  40   0   9    4.23    4.06   0
  41  -7  -2   18.70    2.77   0
  41  -5   0    6.09    2.69   0
  41  -3   2    1.21    2.96   0
  41  -1   6   11.25    3.29   0
  42 -12  -4    1.30    3.51   0
  42  -8  -2   -0.04    3.00   0
  43  -7  -1    1.16    3.14   0
  43  -5   1    2.65    2.83   0
  44  -8  -1    2.24    3.10   0
  44  -4   3    3.37    3.08   0
  45  -7   0    6.06    3.12   0
  45  -5   2   -0.62    3.06   0
 -36 -14   8    7.78    3.36   0
 -36 -12  10    4.89    3.10   0
 -35 -15   6    2.54    3.30   0
 -35 -13   7    3.86    2.75   0
 -35 -11   9    2.58    3.05   0
 -35  -9  13    2.19    3.00   0
 -34 -10   9    9.77    2.61   0
 -34  -8  13   11.49    2.97   0
 -34  -8  14    4.83    3.15   0
 -33 -13   5    6.02    2.86   0
 -32 -16   3    5.00    3.18   0
 -32 -12   5   32.46    2.68   0
 -32 -10   6    3.41    2.39   0
 -32  -8   9   30.30    2.02   0
 -31 -19   2   -2.53    3.46   0
 -31  -9   6    7.31    2.41   0
 -31  -7   9   15.95    2.37   0
 -30  -8   6   53.84    2.60   0
 -29 -17   1    7.69    3.04   0
 -29 -13   2    3.50    2.85   0
 -29 -11   3   31.22    2.72   0
 -29  -5   9   27.08    2.25   0
 -29  -5  10    4.40    1.70   0
 -28 -10   3   34.74    2.58   0
 -28  -4  10    2.46    2.29   0
 -28  -4  11    1.94    1.67   0
 -28  -4  15   -0.02    2.03   0
 -28  -4  16    3.45    3.25   0
 -28  -4  17   -0.06    3.09   0
 -27 -13   1    0.95    2.47   0
 -27  -9   3    1.29    2.16   0
 -27  -5   7    7.62    2.16   0
 -27  -3  12    7.80    2.42   0
 -27  -3  13   12.14    2.51   0
 -27  -3  14    2.47    2.51   0
 -27  -3  15    5.35    2.87   0
 -26 -14   0   23.56    3.10   0
 -26  -8   3   35.58    2.32   0
 -26  -6   5   19.75    1.75   0
 -25  -5   5    8.27    2.07   0
 -25  -3   8   30.52    2.24   0
 -25  -3  18    3.57    3.09   0
 -24 -14  -1   14.92    2.99   0
 -24  -2   9   12.52    2.14   0
 -24  -2  10   31.71    1.77   0
 -24  -2  17    2.23    3.24   0
 -23 -17  -2   25.45    3.93   0
 -23  -7   2    0.88    2.02   0
 -23  -3   6   39.87    2.19   0
 -23  -1  11    7.82    2.23   0
 -23  -1  12   23.73    2.21   0
 -23  -1  13    6.74    1.64   0
 -23  -1  14    1.71    2.27   0
 -22  -4   4  105.64    2.49   0
 -22  -2   7   10.84    2.16   0
 -21 -19  -3   10.78    5.29   0
 -21  -7   1  116.60    2.92   0
 -21  -1   8    7.77    2.07   0
 -21  -1  18    2.66    3.21   0
 -20 -12  -2   49.36    3.37   0
 -20  -4   3   22.24    2.10   0
 -20   0  10    6.01    2.08   0
 -20   0  16    2.85    2.86   0
 -19 -11  -2   12.96    2.75   0
 -19  -7   0  156.24    3.32   0
 -18 -10  -2   32.85    3.07   0
 -18  -8  -1    9.23    2.65   0
 -18  -4   2   41.24    1.88   0
 -18  -2   4  388.23    3.87   0
 -18   0  18    4.42    2.86   0
 -17   1   9  229.64    3.05   0
 -17   1  16    1.39    1.98   0
 -17   1  17    3.99    2.63   0
 -16  -4   1   14.53    2.11   0
 -16  -2   3  110.50    2.82   0
 -16   0   6  196.15    2.67   0
 -15   1   7  665.24    4.54   0
 -15   1  18    4.53    2.87   0
 -14  -2   2  191.56    3.36   0
 -14   2   9    5.07    2.02   0
 -14   2  16   10.89    2.61   0
 -12  -8  -3   27.41    4.22   0
 -12   2  18    1.89    2.92   0
 -11  -3   0  119.04    3.37   0
 -11  -1   2   17.99    1.75   0
 -11   3  15   10.58    2.54   0
 -10 -18  -6   13.82    4.08   0
 -10   2   6  215.15    3.29   0
 -10   2  19    5.19    3.18   0
  -9   3   8   80.79    2.57   0
  -9   3  17   29.52    2.94   0
  -8   0   2  217.15    4.25   0
  -8   2   5   57.30    2.45   0
  -8   2  20    2.37    3.23   0
  -8   4  12   97.45    2.61   0
  -8   4  13   44.98    2.47   0
  -7   1   3 3322.75   12.83   0
  -7   3  18   -1.79    3.08   0
  -6   4   9    2.20    2.03   0
  -6   4  15    4.06    2.47   0
  -5 -23  -7    1.71    4.10   0
  -5  -9  -5  149.62    4.27   0
  -5   3  19    9.61    3.07   0
  -4 -16  -7   17.55    3.10   0
  -4   4   8  145.12    2.98   0
  -3 -15  -7   28.29    3.14   0
  -2 -14  -7   57.67    3.18   0
  -2   4   7   79.26    2.71   0
  -1   5  11   22.84    2.31   0
  -1   5  12   13.59    2.20   0
  -1   5  14    1.76    2.74   0
   0   4   6  297.97    4.60   0
   0   4  18    2.91    3.13   0
   1 -21  -8   12.66    3.48   0
   1 -19  -8   28.95    3.01   0
   1   5   9  250.24    4.10   0
   1   5  15   16.98    2.67   0
   2 -18  -8    8.73    3.13   0
   3  -3  -3 1737.51   10.70   0
   4 -16  -8   24.35    2.76   0
   4  -6  -5    3.49    2.10   0
   5 -15  -8   33.74    2.62   0
   5   5  16    2.11    3.13   0
   6  -4  -4  329.06    4.19   0
   7   5  16   16.07    2.95   0
   8 -14  -8    0.46    2.27   0
   8 -10  -7   48.94    2.39   0
   8   0  -1    9.58    2.79   0
   9   5   7    4.49    2.98   0
   9   5  16    8.72    3.37   0
  11 -13  -8    0.64    2.25   0
  11  -7  -6  127.67    2.51   0
  11  -1  -2   18.68    2.43   0
  11   5  16   20.38    3.55   0
  13 -13  -8   35.70    2.56   0
  13  -7  -6   16.26    2.17   0
  13  -5  -5   17.66    1.65   0
  15 -13  -8   15.26    2.45   0
  15  -7  -6   52.65    2.29   0
  15  -5  -5  173.80    2.57   0
  15  -1  -2   18.62    2.36   0
  16   0  -1    0.25    2.09   0
  17 -13  -8   17.63    2.34   0
  17  -7  -6    7.76    1.48   0
  17  -1  -2   17.51    2.28   0
  17   3   3   84.90    3.24   0
  18   0  -1    1.32    2.09   0
  19 -13  -8   27.23    2.64   0
  20 -10  -7    6.91    2.08   0
  22 -14  -8    7.56    2.54   0
  22 -10  -7   10.89    1.61   0
  22  -4  -4  107.08    2.10   0
  24 -14  -8    2.83    2.03   0
  24  -8  -6   14.01    2.09   0
  24  -6  -5   99.66    2.62   0
  25 -15  -8    0.35    2.75   0
  25 -11  -7    4.05    2.28   0
  25  -1  -1    3.31    2.08   0
  25   3   5   39.87    2.87   0
  26 -16  -8    3.90    2.89   0
  26   2   3   69.43    2.76   0
  27 -17  -8    2.64    3.01   0
  27  -9  -6   10.10    2.20   0
  27  -7  -5   60.84    2.31   0
  27  -5  -4   22.61    2.21   0
  27   3   6    5.49    2.80   0
  28 -18  -8    2.06    3.41   0
  28 -12  -7   47.25    2.56   0
  28   2   4   56.26    2.86   0
  29  -3  -2   61.94    2.49   0
  30 -10  -6   15.43    2.36   0
  30  -8  -5    5.35    2.10   0
  30  -6  -4   34.08    2.26   0
  30  -2  -1   11.51    2.27   0
  30   2   5   42.62    2.93   0
  32 -14  -7    2.83    2.13   0
  32   0   2    4.78    2.24   0
  33 -17  -7    4.91    3.09   0
  33 -15  -7    2.86    2.35   0
  33  -9  -5   25.27    2.46   0
  33  -7  -4   14.24    2.37   0
  33  -3  -1   39.14    2.51   0
  33  -1   1    9.72    2.23   0
  34 -16  -7    3.98    2.55   0
  34 -12  -6    4.19    2.43   0
  34  -6  -3    2.77    2.17   0
  34   2  10    5.19    3.77   0
  35 -13  -6    2.07    2.83   0
  35  -5  -2    5.69    2.32   0
  35  -1   2    5.84    2.49   0
  35   1   6    5.98    2.75   0
  36 -14  -6    2.81    3.20   0
  36  -4  -1   14.60    2.64   0
  36  -2   1   41.55    2.46   0
  37 -15  -6   -3.19    3.47   0
  37 -11  -5    3.38    1.98   0
  37  -9  -4    3.78    2.74   0
  37  -7  -3    1.11    1.84   0
  37  -1   3    2.91    2.65   0
  37   1   9    1.12    3.26   0
  37   1  10    5.49    3.81   0
  38 -12  -5   -0.05    2.76   0
  38 -10  -4    0.39    2.65   0
  38  -8  -3    9.55    2.49   0
  38  -6  -2    1.03    1.87   0
  38  -4   0    1.95    2.37   0
  38  -2   2   14.85    2.59   0
  38   0   6    0.89    2.95   0
  39 -13  -5    2.90    3.37   0
  39  -7  -2   16.67    2.72   0
  40  -6  -1    0.50    2.80   0
  40  -4   1   27.35    2.73   0
  41  -1   7    0.20    3.33   0
  42 -10  -3   10.01    2.46   0
  42  -6   0    0.02    3.13   0
  42  -4   2    3.76    3.03   0
  43 -11  -3    6.58    3.14   0
  43  -9  -2   10.89    2.39   0
  43  -3   4    0.67    3.06   0
  44 -10  -2    1.59    3.32   0
  44  -6   1    4.61    3.19   0
  45  -5   3    0.43    3.41   0
 -37 -13   9   12.74    3.45   0
 -36 -16   6    7.77    3.16   0
 -36 -14   7    1.30    3.26   0
 -36 -12   9    4.26    2.28   0
 -36 -10  11    2.18    2.98   0
 -36 -10  12    4.01    3.61   0
 -35 -17   5    1.45    3.53   0
 -35  -9  11   -1.26    2.98   0
 -35  -9  12   -0.05    2.94   0
 -34 -14   5    7.89    2.91   0
 -34 -12   6    3.37    2.62   0
 -34  -8  11   -1.79    2.95   0
 -34  -8  12   15.46    2.39   0
 -33 -15   4   -1.57    2.80   0
 -33  -9   8    9.73    1.95   0
 -33  -7  11   18.16    2.96   0
 -33  -7  12   16.36    2.90   0
 -33  -7  13    8.64    2.43   0
 -33  -7  14    0.99    2.45   0
 -33  -7  15    4.12    2.60   0
 -32  -8   8   46.67    2.14   0
 -32  -6  11   38.64    2.72   0
 -32  -6  12   14.69    2.94   0
 -32  -6  13    1.94    2.82   0
 -32  -6  14    7.75    2.94   0
 -32  -6  15    0.86    3.06   0
 -31 -17   2    2.82    3.04   0
 -31 -13   3   16.31    2.90   0
 -31 -11   4   35.88    2.57   0
 -31  -7   8   17.06    2.41   0
 -31  -5  12    6.50    2.56   0
 -31  -5  13   12.07    2.98   0
 -31  -5  14    6.26    2.94   0
 -31  -5  15    2.37    3.12   0
 -30 -14   2   11.08    2.92   0
 -30 -12   3   11.86    2.54   0
 -30  -6   8   23.77    2.48   0
 -29  -9   4   19.33    2.40   0
 -29  -7   6   13.00    1.71   0
 -28 -20   0    2.19    3.83   0
 -28 -18   0    4.46    3.69   0
 -28 -14   1    1.58    2.60   0
 -28  -8   4    9.88    2.32   0
 -28  -4   9    7.43    2.27   0
 -27  -3  11   65.96    2.03   0
 -27  -3  16    3.37    2.29   0
 -27  -3  17   10.92    3.47   0
 -26 -20  -1    2.22    4.06   0
 -26  -2  12    9.41    2.41   0
 -26  -2  13   -0.59    2.40   0
 -26  -2  14   27.03    2.60   0
 -26  -2  15    5.83    2.81   0
 -26  -2  16   18.33    3.00   0
 -25  -7   3   31.14    1.72   0
 -24  -6   3   14.68    2.10   0
 -23  -1  10   15.41    2.08   0
 -23  -1  16    4.94    2.24   0
 -23  -1  17   10.91    3.17   0
 -22  -6   2  127.28    2.77   0
 -22   0  12    5.44    2.27   0
 -22   0  13   11.97    2.28   0
 -22   0  14   13.15    2.61   0
 -22   0  15    0.08    2.40   0
 -21 -13  -2   20.19    3.19   0
 -20  -6   1   42.27    2.34   0
 -20   0   9   17.87    1.67   0
 -20   0  17   -0.49    2.18   0
 -20   0  18   14.54    2.86   0
 -19  -1   6   67.63    1.91   0
 -19   1  11   86.01    2.53   0
 -19   1  12    6.01    1.58   0
 -19   1  13   10.96    1.66   0
 -19   1  14   10.84    1.83   0
 -19   1  15   29.82    2.66   0
 -19   1  16    4.55    2.58   0
 -18   0   7   19.58    1.54   0
 -18   0  19   -0.75    3.14   0
 -17   1   8   19.09    1.94   0
 -17   1  18    1.56    3.17   0
 -16   2  11   60.73    2.41   0
 -16   2  13    7.36    1.76   0
 -16   2  14   17.89    1.91   0
 -16   2  15   14.45    2.66   0
 -15   1  19    2.86    3.07   0
 -14 -22  -5    3.46    5.61   0
 -14   2  17   -0.77    2.62   0
 -13  -5  -1  567.45    6.72   0
 -13   3  11   22.16    2.12   0
 -13   3  12   40.28    2.44   0
 -13   3  13   58.28    2.62   0
 -13   3  14    9.48    2.48   0
 -12   2   7   28.74    1.70   0
 -12   2  19   -1.12    3.04   0
 -11   3   9  142.73    2.77   0
 -11   3  16    4.46    2.06   0
 -11   3  17   16.99    2.75   0
 -10 -22  -6   10.55    4.36   0
  -9   3  18    8.99    3.15   0
  -8   4  10  178.90    2.91   0
  -8   4  11   10.33    1.98   0
  -8   4  14   54.15    2.50   0
  -8   4  15    7.96    2.44   0
  -7   3  19    0.18    3.08   0
  -6   2   4  297.25    4.23   0
  -6   4  16   11.51    2.56   0
  -5 -21  -7    2.88    3.45   0
  -5 -19  -7    7.94    3.28   0
  -4   4  17   12.33    2.67   0
  -3 -11  -6   53.00    3.20   0
  -3   5  12   10.42    2.19   0
  -3   5  13    9.61    2.20   0
  -2   4  18   -0.41    3.12   0
  -1   5  10    4.65    2.24   0
  -1   5  15    6.48    2.63   0
   1  -5  -4  226.89    4.31   0
   1   5  16   16.18    3.05   0
   2 -20  -8    1.67    2.88   0
   2   2   2 2059.76   24.21   0
   2   4  19    1.66    3.54   0
   3 -23  -8    3.02    3.42   0
   3 -17  -8    2.64    2.42   0
   3   5   8   23.03    2.24   0
   3   5  16    9.33    2.84   0
   4   4   5  192.81    5.21   0
   4   4  19    2.66    3.42   0
   5 -11  -7   97.47    2.80   0
   5   3   3  145.58    9.80   0
   6  -8  -6  183.68    3.30   0
   6  -6  -5   14.07    2.20   0
   6   4  19    1.31    3.54   0
   7 -15  -8   23.86    2.55   0
   8  -4  -4  166.29    3.24   0
   8   4  19    2.47    3.61   0
  10 -14  -8   47.99    2.52   0
  10 -10  -7   31.42    1.73   0
  10   0  -1    4.10    2.39   0
  12 -14  -8   28.91    2.41   0
  12 -10  -7  100.68    2.57   0
  12   0  -1   -0.51    2.13   0
  13  -1  -2   26.39    1.74   0
  13   5  16    0.58    3.37   0
  14 -14  -8    4.14    2.18   0
  14 -10  -7   20.35    2.15   0
  14   0  -1   23.95    2.30   0
  16 -14  -8    7.67    2.42   0
  16 -10  -7   23.44    2.19   0
  16   4   5    7.56    2.89   0
  17   5  15    1.16    4.40   0
  18 -14  -8    9.79    2.52   0
  18 -10  -7   22.21    1.72   0
  18  -4  -4  341.36    3.62   0
  19   5  14    6.76    6.06   0
  20 -14  -8   73.83    2.26   0
  20  -8  -6   38.04    2.37   0
  20  -6  -5   40.38    2.16   0
  20   2   2   25.04    2.56   0
  20   4   6  182.86    4.78   0
  21 -15  -8    1.87    2.51   0
  21 -11  -7    2.96    2.02   0
  22 -16  -8   27.64    2.51   0
  22  -8  -6    3.98    1.54   0
  22  -6  -5   10.75    1.72   0
  23 -15  -8   17.86    2.00   0
  23 -11  -7   22.86    1.79   0
  23  -3  -3    3.50    1.50   0
  24 -16  -8    8.20    2.57   0
  24  -2  -2  262.81    2.95   0
  24   0   0   11.79    2.12   0
  24   4   8    8.03    3.11   0
  25 -19  -8    4.66    3.09   0
  25 -17  -8    2.47    2.87   0
  25  -9  -6   15.67    2.18   0
  25  -7  -5    0.43    2.05   0
  26 -18  -8    2.96    3.03   0
  26 -12  -7   31.88    1.94   0
  27 -19  -8    0.87    3.16   0
  27 -13  -7    2.88    2.57   0
  28 -10  -6   15.96    2.35   0
  28  -6  -4    7.86    2.07   0
  28   0   1   33.45    2.33   0
  29   3   8   24.41    3.22   0
  30 -14  -7   15.23    2.23   0
  31 -15  -7    2.23    2.25   0
  31  -9  -5   13.41    2.26   0
  31  -7  -4   17.41    2.27   0
  32 -16  -7    4.20    2.40   0
  32 -12  -6   -2.31    2.46   0
  32  -4  -2   43.59    1.90   0
  32  -2   0   65.00    2.78   0
  32   2   7   26.58    3.21   0
  33 -13  -6   32.69    2.98   0
  33   1   5    0.51    2.59   0
  34 -14  -6    1.29    2.76   0
  34 -10  -5    2.26    1.76   0
  34  -8  -4    6.23    2.16   0
  35 -15  -6    1.04    2.94   0
  35 -11  -5   -0.01    2.54   0
  35  -7  -3    2.97    2.47   0
  35  -3   0   -1.41    2.51   0
  35   1   7    6.98    3.16   0
  36 -16  -6    4.74    3.61   0
  36 -12  -5   26.10    2.75   0
  36  -6  -2    8.13    2.29   0
  36   0   5    7.64    2.71   0
  37 -13  -5    1.76    2.81   0
  37  -5  -1    2.80    2.57   0
  37  -3   1    0.73    2.28   0
  38 -14  -5    1.77    3.01   0
  38   0   7    9.72    3.09   0
  39 -11  -4    8.15    2.31   0
  39  -9  -3    1.52    2.92   0
  39  -3   2   42.17    2.94   0
  40 -12  -4    1.77    3.04   0
  40 -10  -3   16.39    3.13   0
  40  -8  -2   -1.00    3.05   0
  40  -2   4    5.12    2.94   0
  41 -13  -4   -1.97    3.23   0
  41 -11  -3   -1.07    3.01   0
  41  -7  -1    3.69    2.83   0
  41  -5   1    3.77    2.70   0
  41  -3   3    1.20    2.84   0
  41  -1   8    1.82    3.48   0
  42  -8  -1   14.96    2.75   0
  43  -7   0    0.53    3.22   0
  43  -5   2   16.58    3.26   0
  43  -3   5    0.63    3.43   0
  44  -8   0   -0.66    3.04   0
  44  -4   4    4.56    3.45   0
  45  -7   1    1.20    2.56   0
 -37 -13   8   -0.07    2.94   0
 -37 -11  10    6.29    3.08   0
 -37 -11  11    2.33    3.13   0
 -36 -12   8   13.42    2.96   0
 -36 -10  10    7.77    3.24   0
 -35 -15   5    2.76    3.21   0
 -35 -13   6   -1.17    3.07   0
 -35  -9  10    5.27    2.68   0
 -34 -16   4   -0.68    3.26   0
 -34 -10   7   22.98    2.90   0
 -34  -8  10    1.29    2.54   0
 -33 -17   3    2.22    3.22   0
 -33  -9   7    1.81    2.42   0
 -33  -7  10   22.19    2.66   0
 -32 -14   3    3.80    2.96   0
 -32 -12   4    0.84    2.58   0
 -32 -10   5    1.15    2.40   0
 -32  -8   7   16.37    2.52   0
 -32  -6  10    5.17    2.70   0
 -31  -9   5   11.13    2.31   0
 -31  -7   7   31.78    2.67   0
 -31  -5  10   11.24    2.51   0
 -31  -5  11   29.35    2.56   0
 -31  -5  16   -0.19    2.50   0
 -30 -18   1    3.23    3.67   0
 -30  -8   5    2.81    2.18   0
 -30  -4  11    3.45    2.35   0
 -30  -4  12   14.45    2.35   0
 -30  -4  13    4.12    1.88   0
 -30  -4  14    7.01    1.96   0
 -30  -4  15    3.37    2.81   0
 -30  -4  16   15.12    3.41   0
 -29 -15   1   10.04    2.82   0
 -29  -5   8   14.72    1.68   0
 -29  -3  13    7.45    2.41   0
 -29  -3  14    4.51    2.66   0
 -29  -3  15   12.20    2.66   0
 -27 -15   0    8.81    2.75   0
 -27  -7   4   53.13    1.97   0
 -26 -18  -1    1.30    3.41   0
 -26  -6   4  105.00    2.60   0
 -26  -2  10   27.77    2.31   0
 -26  -2  11   40.07    1.84   0
 -26  -2  17    0.30    3.25   0
 -25 -15  -1    8.19    3.24   0
 -25  -3   7    1.54    1.63   0
 -25  -1  12   11.13    2.31   0
 -25  -1  14   11.61    2.52   0
 -24 -20  -2   20.98    4.79   0
 -24  -2   8   46.67    1.80   0
 -23  -5   3   20.77    1.99   0
 -23  -1   9   10.33    1.59   0
 -23  -1  18   -0.62    2.87   0
 -22 -14  -2   44.50    3.79   0
 -22  -2   6   49.64    2.14   0
 -22   0  11    3.39    1.51   0
 -22   0  16   36.94    2.76   0
 -22   0  17   11.01    2.76   0
 -21  -5   2   14.00    2.06   0
 -21  -3   4   41.74    2.29   0
 -21  -1   7   53.19    1.78   0
 -20   0   8   44.39    2.37   0
 -20   0  19    2.62    3.15   0
 -19   1  10   53.86    1.87   0
 -19   1  17   29.15    3.00   0
 -18  -6   0    6.35    2.08   0
 -17  -9  -2   84.03    3.62   0
 -17  -7  -1   91.89    3.31   0
 -17  -3   2    6.13    2.14   0
 -17   1  19   13.62    3.43   0
 -16   0   5    6.17    2.15   0
 -16   2  10   49.04    1.92   0
 -16   2  16    8.65    2.00   0
 -14  -4   0  487.27    5.34   0
 -14   0   4  239.20    3.43   0
 -13   1   5  231.45    3.36   0
 -13   3  15   58.17    2.21   0
 -13   3  16   14.77    2.61   0
 -12  -6  -2   33.35    3.24   0
 -12  -2   1   18.55    2.09   0
 -11   3   8   45.26    2.36   0
 -11   3  18    1.50    2.77   0
 -10 -20  -6    2.22    3.60   0
 -10   4  12   36.69    2.38   0
 -10   4  13   23.79    2.49   0
 -10   4  14   34.45    2.56   0
  -9  -1   1   90.71    3.28   0
  -9   3   7   34.51    2.22   0
  -9   3  19    7.56    3.09   0
  -8   4  16   26.01    2.88   0
  -7   3   6  129.80    3.02   0
  -6   4   8  325.05    3.80   0
  -6   4  17    8.84    2.60   0
  -5  -1   0   50.71    3.76   0
  -4 -22  -7   11.35    3.70   0
  -4 -18  -7   29.89    3.16   0
  -4   4   7  173.25    3.39   0
  -4   4  18   15.96    3.13   0
  -3   5  10   25.80    2.33   0
  -3   5  11   58.28    2.39   0
  -3   5  14    4.09    2.38   0
  -3   5  15   47.32    2.83   0
  -2  -8  -5   26.85    2.35   0
  -2   4  19    1.23    3.58   0
  -1   3   4  305.08    5.15   0
  -1   5   9    4.79    2.10   0
  -1   5  16    9.05    2.77   0
   0   4  19    3.44    3.46   0
   1 -13  -7    4.16    2.20   0
   1   5   8   88.99    3.11   0
   3 -21  -8    7.63    3.01   0
   3 -19  -8    8.75    2.78   0
   3   5  17    9.66    3.37   0
   4 -22  -8    4.78    3.20   0
   4 -20  -8    0.86    2.97   0
   4 -18  -8   13.15    2.64   0
   4 -12  -7   44.38    2.54   0
   5 -23  -8    1.02    3.40   0
   5 -17  -8   14.58    2.64   0
   5   5  17    2.59    2.95   0
   6 -16  -8   15.84    2.38   0
   7   5   7   24.23    2.71   0
   7   5  17   12.72    3.03   0
   8 -16  -8    4.50    2.57   0
   8  -8  -6  304.74    3.61   0
   8  -6  -5    9.79    2.25   0
   9 -15  -8  122.56    3.02   0
   9 -11  -7  124.17    2.69   0
   9   5  17    7.49    3.80   0
  10  -8  -6   75.57    2.52   0
  10  -4  -4  279.13    3.71   0
  11 -15  -8    9.00    2.49   0
  11   5  17   11.96    3.84   0
  12  -8  -6  609.90    4.43   0
  12  -4  -4   35.46    2.36   0
  13 -15  -8   39.57    2.46   0
  14  -8  -6  129.77    2.61   0
  14  -4  -4  390.24    3.89   0
  15 -15  -8    0.74    2.41   0
  15   3   3  169.58    4.05   0
  15   5  16    8.06    4.14   0
  16  -8  -6   23.65    2.16   0
  16  -4  -4  156.98    2.46   0
  17 -15  -8   28.55    2.55   0
  17 -11  -7   18.83    2.15   0
  18 -16  -8   10.72    2.33   0
  18  -8  -6    0.86    2.01   0
  18  -6  -5    3.41    1.99   0
  19 -15  -8    2.51    1.80   0
  19 -11  -7   12.73    2.17   0
  19  -3  -3  213.14    3.11   0
  20 -16  -8   38.66    2.66   0
  21 -17  -8    0.31    2.81   0
  21  -3  -3  301.29    3.07   0
  21   3   4   28.44    2.36   0
  22 -20  -8    4.29    3.18   0
  22 -18  -8    5.82    3.05   0
  22 -12  -7    6.65    2.39   0
  22  -2  -2   42.03    2.36   0
  22   0   0  231.98    3.46   0
  22   4   7    0.62    3.16   0
  23 -19  -8    1.58    3.09   0
  23 -17  -8   -0.31    2.02   0
  23  -9  -6    2.17    2.04   0
  23  -7  -5  110.94    2.64   0
  23  -5  -4   11.93    2.20   0
  23  -1  -1  194.16    2.70   0
  24 -20  -8    1.16    3.30   0
  24 -18  -8    1.48    2.30   0
  24 -12  -7   27.05    1.83   0
  24   2   3   37.25    2.51   0
  25 -13  -7   10.09    2.55   0
  26 -14  -7   41.52    2.66   0
  26 -10  -6    7.99    2.22   0
  26  -4  -3   14.03    1.77   0
  27  -3  -2   19.32    2.19   0
  27  -1   0   11.53    1.96   0
  28 -14  -7   23.08    2.10   0
  28  -8  -5   12.35    1.69   0
  28  -2  -1  103.55    2.19   0
  29 -15  -7    0.81    2.22   0
  29 -11  -6    7.39    1.75   0
  29   3   9   15.82    3.53   0
  29   3  13    1.69    5.13   0
  30 -18  -7    2.42    2.96   0
  30 -16  -7    2.33    2.25   0
  30 -12  -6    3.78    2.53   0
  30  -4  -2    4.03    2.14   0
  30   0   2    2.93    2.19   0
  31 -17  -7    4.40    2.30   0
  31 -13  -6   46.49    2.67   0
  31  -3  -1    2.88    2.30   0
  31  -1   1    8.52    2.32   0
  31   1   4   46.84    2.61   0
  32 -10  -5    2.40    2.35   0
  32  -8  -4    9.92    2.30   0
  32  -6  -3   13.00    2.26   0
  33 -11  -5    7.43    2.25   0
  33  -1   2   11.36    2.40   0
  34 -16  -6    6.13    3.04   0
  34  -4  -1   10.64    2.26   0
  34  -2   1    8.11    2.43   0
  35  -9  -4    2.06    1.82   0
  35  -1   3    7.47    2.52   0
  36  -4   0    2.67    2.34   0
  36  -2   2   24.11    2.73   0
  37 -11  -4    3.77    2.86   0
  37  -7  -2    3.93    2.66   0
  38 -12  -4    1.16    2.79   0
  38  -6  -1   -1.35    2.58   0
  38  -2   3    6.58    2.59   0
  38   0   8    0.75    3.17   0
  39 -13  -4    2.79    2.99   0
  39  -5   0    1.83    1.88   0
  39  -1   6   11.49    3.16   0
  40  -6   0    5.31    2.51   0
  40  -4   2    5.16    2.69   0
  41  -9  -2   14.84    2.37   0
  41  -3   4    4.97    2.87   0
  42 -12  -3    0.77    2.60   0
  42 -10  -2    6.37    2.86   0
  42  -6   1    0.65    3.04   0
  42  -2   7    3.35    3.58   0
  43 -11  -2    6.04    3.14   0
  43  -9  -1    1.38    2.99   0
  44 -10  -1    8.80    3.10   0
  44  -6   2    1.92    2.97   0
  44  -4   5    8.46    3.51   0
  45  -7   2    3.56    3.55   0
 -37 -11   9    4.56    3.14   0
 -36 -16   5    0.53    3.64   0
 -36 -14   6    3.37    3.20   0
 -36 -12   7    3.92    3.17   0
 -36 -10   9    7.56    3.11   0
 -36  -8  12    2.73    2.91   0
 -36  -8  13   -0.70    3.29   0
 -35 -17   4    1.62    3.72   0
 -35 -11   7    1.20    2.08   0
 -35  -9   9    9.70    2.11   0
 -35  -7  12    1.42    2.84   0
 -35  -7  13    7.15    3.35   0
 -35  -7  14    5.66    3.47   0
 -34 -12   5   14.48    2.58   0
 -34  -8   9    7.51    2.01   0
 -34  -6  13   18.79    3.29   0
 -34  -6  14   -1.25    3.42   0
 -33 -13   4    1.99    2.86   0
 -33 -11   5   10.51    2.75   0
 -33  -7   9   33.65    2.05   0
 -33  -5  14   -2.47    2.85   0
 -32 -18   2    5.36    3.44   0
 -32  -6   9   16.33    2.57   0
 -31 -15   2    1.58    2.88   0
 -30 -16   1    4.24    3.35   0
 -30  -6   7    9.44    1.70   0
 -30  -4  10   47.26    2.49   0
 -29  -7   5    6.46    1.67   0
 -29  -5   7   17.92    2.41   0
 -29  -3  11    5.82    2.30   0
 -29  -3  12    0.47    1.72   0
 -29  -3  16   -0.46    2.42   0
 -29  -3  17    2.30    3.41   0
 -28 -16   0   10.31    3.40   0
 -28  -6   5   41.57    2.45   0
 -28  -2  12    7.68    2.33   0
 -28  -2  14    7.77    2.65   0
 -27 -11   1    5.54    2.68   0
 -27  -3   8   20.71    2.23   0
 -26 -10   1   36.82    2.78   0
 -26  -4   6   28.41    1.80   0
 -26  -2   9   10.83    2.12   0
 -26  -2  18    1.59    2.51   0
 -25  -9   1   24.01    2.50   0
 -25  -5   4   18.43    2.06   0
 -25  -1  10   31.17    2.36   0
 -25  -1  11    3.78    1.65   0
 -25  -1  16    1.51    2.13   0
 -25  -1  17    0.07    3.18   0
 -24 -18  -2   17.48    4.29   0
 -24  -2   7    3.35    2.17   0
 -24   0  13    6.30    2.32   0
 -24   0  15    3.02    2.56   0
 -23  -1   8   29.52    2.27   0
 -22   0   9   -1.54    2.03   0
 -22   0  18    6.16    3.18   0
 -21 -17  -3   21.33    5.19   0
 -21   1  11   21.37    2.02   0
 -21   1  12   29.84    2.35   0
 -21   1  14    4.96    1.86   0
 -21   1  15   34.10    2.80   0
 -21   1  16    4.68    2.92   0
 -19  -5   1  103.59    2.80   0
 -19  -1   5  102.07    2.55   0
 -19   1  18   11.93    3.34   0
 -18   0   6   66.07    1.89   0
 -18   2  11    3.55    2.12   0
 -18   2  14   87.10    2.29   0
 -18   2  16    4.84    2.71   0
 -17  -1   4   23.93    1.70   0
 -16   2   9   13.60    1.53   0
 -16   2  18    2.45    3.15   0
 -15  -3   1   72.04    2.47   0
 -15  -1   3  152.84    3.05   0
 -15   1   6   63.11    1.93   0
 -15   3  11   14.21    2.10   0
 -15   3  12   15.96    2.22   0
 -15   3  13   13.59    2.18   0
 -15   3  14    2.26    2.57   0
 -15   3  15   30.84    2.63   0
 -14 -20  -5    5.29    5.11   0
 -14   2   7   33.95    2.28   0
 -14   2  19   -1.04    3.02   0
 -13   3   9   29.96    2.12   0
 -13   3  17   -0.34    2.96   0
 -12   0   3   22.58    2.19   0
 -10   2   5   87.60    2.78   0
 -10   4  10   28.10    2.07   0
 -10   4  15    0.23    2.33   0
 -10   4  16   35.04    2.87   0
  -9 -23  -6    2.28    4.58   0
  -9 -17  -6   12.72    3.53   0
  -8   4   9   59.08    1.93   0
  -8   4  17    3.62    2.74   0
  -6   4  18    2.05    3.09   0
  -5  -7  -4   29.08    3.30   0
  -5   5  11   52.05    2.42   0
  -5   5  12    2.96    2.15   0
  -5   5  13   24.04    2.18   0
  -5   5  14    9.32    2.43   0
  -5   5  15   21.60    2.47   0
  -4 -20  -7   22.31    3.47   0
  -4 -12  -6   16.51    2.68   0
  -4   4  19    4.88    3.14   0
  -3 -23  -7    0.65    3.76   0
  -3 -17  -7   30.07    3.15   0
  -3   5  16   11.49    2.59   0
  -2 -16  -7   24.53    2.87   0
  -2  -6  -4  163.06    4.16   0
  -2   4   6  642.51    5.72   0
  -1 -15  -7    0.88    2.75   0
  -1   5  17    4.50    3.04   0
   0 -14  -7    6.34    2.34   0
   1   5  17   24.62    3.00   0
   2  -2  -2 1015.12   10.06   0
   3 -13  -7   32.15    2.59   0
   5 -21  -8   -0.72    3.01   0
   5 -19  -8    3.76    2.67   0
   5  -9  -6  217.16    3.45   0
   5   5   7   28.52    2.60   0
   6 -22  -8    4.81    3.24   0
   6 -20  -8   14.14    3.02   0
   6 -18  -8   10.45    2.65   0
   6 -12  -7   51.86    2.56   0
   7 -23  -8    2.98    3.54   0
   7 -21  -8    2.90    3.21   0
   7 -19  -8    0.62    2.76   0
   7 -17  -8    0.85    2.49   0
   8 -22  -8    4.46    3.49   0
   8 -18  -8   -0.41    2.70   0
   9 -23  -8    2.21    3.50   0
   9 -17  -8   15.84    2.58   0
  10 -16  -8   10.29    2.43   0
  10  -6  -5  153.84    3.10   0
  11 -17  -8   21.55    2.53   0
  11 -11  -7   17.95    2.02   0
  12 -16  -8   13.72    2.47   0
  12  -6  -5    9.70    2.16   0
  13 -17  -8    5.81    2.47   0
  13 -11  -7   51.42    2.48   0
  13   5  17    2.14    4.36   0
  14 -16  -8    5.92    2.69   0
  14  -6  -5   51.74    2.43   0
  15 -17  -8   13.15    2.38   0
  15 -11  -7    1.69    1.61   0
  16  -6  -5    2.56    1.45   0
  17 -17  -8   10.32    2.81   0
  18 -18  -8    0.12    2.91   0
  18   2   2  112.04    3.00   0
  19 -21  -8    0.23    3.33   0
  19 -19  -8    1.70    2.89   0
  19 -17  -8    9.26    2.60   0
  19  -9  -6    2.02    2.09   0
  20 -20  -8   -0.17    3.30   0
  20 -18  -8    3.92    2.94   0
  20 -12  -7    5.09    2.32   0
  20  -2  -2  111.58    2.74   0
  21 -21  -8    1.82    3.17   0
  21 -19  -8    1.80    2.76   0
  21  -9  -6   55.90    1.85   0
  21  -7  -5   22.77    2.23   0
  21  -5  -4    7.98    2.07   0
  23 -13  -7   49.72    2.66   0
  23   3   5   50.78    3.08   0
  24 -14  -7   20.03    2.44   0
  24 -10  -6    5.88    2.21   0
  24  -4  -3   10.95    2.11   0
  25  -3  -2   86.33    2.48   0
  26  -8  -5   16.55    1.67   0
  26  -2  -1   23.59    2.12   0
  26   0   1   63.83    2.52   0
  26   2   4   23.09    2.38   0
  27 -15  -7    5.40    2.19   0
  27 -11  -6    5.92    2.21   0
  27  -5  -3    2.86    2.01   0
  27   3   7    8.09    2.84   0
  28 -18  -7    4.58    2.84   0
  28 -12  -6    4.73    2.37   0
  28   2   5    9.21    2.70   0
  29 -19  -7    4.20    3.59   0
  29 -17  -7    0.82    2.30   0
  29  -9  -5    5.36    1.65   0
  29  -7  -4   40.98    1.77   0
  29   3  10    0.89    3.80   0
  30 -10  -5    5.32    2.25   0
  30  -6  -3   51.21    2.29   0
  30  -2   0   21.09    2.37   0
  30   2   6   14.24    2.49   0
  32 -14  -6    2.23    2.13   0
  32   2   8    8.36    2.72   0
  33 -17  -6    3.73    3.06   0
  33 -15  -6    0.74    2.37   0
  33  -9  -4    2.35    2.34   0
  33  -7  -3    0.29    2.26   0
  33   1   6   18.23    2.69   0
  34 -12  -5   11.13    1.99   0
  34 -10  -4    3.20    2.27   0
  34  -6  -2    6.22    2.44   0
  35 -13  -5   -0.07    2.48   0
  35  -5  -1   11.65    2.51   0
  35   1   8    3.79    2.79   0
  36 -14  -5    5.91    2.85   0
  36   0   6    6.96    2.73   0
  37 -15  -5    8.63    2.53   0
  37  -9  -3    2.60    1.98   0
  38 -10  -3   17.09    2.87   0
  38  -8  -2    2.43    2.78   0
  38  -4   1    0.59    2.30   0
  38   0   9   -0.39    3.43   0
  38   0  10    3.63    4.06   0
  39 -11  -3    6.70    3.16   0
  39  -9  -2   26.52    3.12   0
  39  -7  -1    5.65    2.53   0
  39  -3   3    5.34    2.78   0
  39  -1   7    0.92    2.90   0
  40 -12  -3    0.28    3.16   0
  40  -8  -1   10.94    2.79   0
  41 -13  -3    2.70    3.53   0
  41  -7   0    1.08    2.83   0
  41  -5   2    9.94    2.70   0
  42  -8   0    4.90    2.86   0
  42  -4   4    0.62    2.91   0
  43  -7   1    2.75    2.90   0
  43  -5   3   -1.91    2.99   0
  44  -8   1    2.87    3.38   0
  44  -6   3    5.77    3.15   0
 -38 -12   9    3.75    3.11   0
 -38 -10  11    2.01    3.53   0
 -37 -15   6    0.54    3.45   0
 -37 -13   7    1.52    3.23   0
 -37 -11   8   15.20    3.00   0
 -36  -8  11    1.93    2.78   0
 -35 -13   5    2.27    2.94   0
 -35 -11   6    6.82    2.59   0
 -35  -9   8   19.49    2.57   0
 -35  -7  11   15.61    2.72   0
 -34 -18   3    5.41    3.66   0
 -34 -14   4    0.86    2.77   0
 -34 -10   6    4.43    2.68   0
 -34  -8   8   11.89    2.51   0
 -34  -6  11    1.18    2.98   0
 -34  -6  12   10.75    2.31   0
 -33 -15   3    7.85    2.81   0
 -33  -9   6    3.18    2.38   0
 -33  -7   8    8.17    2.42   0
 -33  -5  11   13.99    2.53   0
 -33  -5  12    3.20    2.62   0
 -33  -5  15    4.13    2.45   0
 -32 -16   2    1.95    2.97   0
 -32  -8   6    1.02    2.23   0
 -32  -6   8   23.49    2.66   0
 -32  -4  13    2.95    2.86   0
 -32  -4  14    5.13    3.02   0
 -32  -4  15    8.67    3.16   0
 -32  -4  16   -0.35    3.46   0
 -31 -19   1    1.70    3.85   0
 -31 -11   3    8.24    2.75   0
 -31  -7   6    7.99    2.44   0
 -30 -12   2   12.84    2.87   0
 -30 -10   3    6.98    2.39   0
 -30  -6   6   21.85    2.42   0
 -30  -4   9   13.49    2.35   0
 -29 -19   0    2.77    3.92   0
 -29  -9   3   29.34    2.46   0
 -29  -3  10   10.19    2.24   0
 -28 -12   1    1.71    2.46   0
 -28 -10   2   17.04    2.24   0
 -28  -8   3   60.68    2.48   0
 -28  -4   7    2.71    1.97   0
 -28  -2  11   12.36    2.32   0
 -28  -2  16    5.78    2.30   0
 -28  -2  17    8.30    3.49   0
 -27  -9   2   12.33    2.12   0
 -27  -5   5   13.91    2.14   0
 -27  -1  13    4.60    2.37   0
 -27  -1  14    3.01    2.47   0
 -27  -1  15    7.49    2.75   0
 -27  -1  16    5.83    2.91   0
 -26 -16  -1    6.32    3.36   0
 -26 -12   0    6.05    2.62   0
 -26  -8   2   27.70    2.29   0
 -26  -2   8    1.58    2.04   0
 -25 -11   0   34.97    2.65   0
 -25  -7   2   10.68    2.01   0
 -25  -3   6   38.19    1.83   0
 -25  -1   9   82.80    2.52   0
 -25  -1  18    6.71    2.46   0
 -24 -10   0   62.16    2.80   0
 -24  -8   1   32.51    2.39   0
 -24  -4   4   11.38    2.00   0
 -24   0  11   28.02    2.31   0
 -24   0  12   12.08    1.73   0
 -24   0  16    5.79    2.13   0
 -24   0  17   15.10    3.22   0
 -23 -15  -2   12.21    3.70   0
 -23  -9   0    5.57    2.24   0
 -22  -2   5   19.65    2.10   0
 -21  -1   6   70.88    1.88   0
 -21   1  10    8.89    2.21   0
 -21   1  17    9.18    2.76   0
 -20  -4   2    6.68    2.09   0
 -20  -2   4   39.02    2.29   0
 -20   0   7    2.72    1.40   0
 -20   2  14    2.53    2.28   0
 -19   1   8    3.23    2.04   0
 -19   1  19    4.88    3.06   0
 -18  -2   3  100.32    2.75   0
 -18   2  10   26.70    2.20   0
 -16  -8  -2   41.41    3.07   0
 -16   2   8   38.42    2.14   0
 -16   2  19    0.34    3.44   0
 -15   3  10   33.36    2.24   0
 -15   3  16    2.95    1.86   0
 -15   3  17    8.68    2.95   0
 -13  -1   2   27.53    2.33   0
 -13   3  18    7.15    2.76   0
 -12   4  11    5.14    2.00   0
 -12   4  12   17.46    2.30   0
 -12   4  13    9.41    2.24   0
 -12   4  14   14.18    2.40   0
 -12   4  15   12.71    2.44   0
 -11   3   7   17.74    2.19   0
 -11   3  19    0.86    3.01   0
 -10   4  17   12.88    2.99   0
  -9   1   3 1368.92    7.91   0
  -8 -16  -6    7.40    3.13   0
  -8   4   8   16.88    2.18   0
  -8   4  18   28.00    3.19   0
  -7   5  12   11.84    2.34   0
  -7   5  13    0.13    2.15   0
  -7   5  14    6.34    2.37   0
  -6   4   7  121.34    3.04   0
  -6   4  19    5.59    3.37   0
  -5 -13  -6    3.03    2.63   0
  -5   1   2  133.45    3.67   0
  -5   5  10   26.03    2.28   0
  -5   5  16    0.15    2.61   0
  -4   2   3  462.64    5.95   0
  -3 -21  -7    8.02    3.39   0
  -3 -19  -7    1.63    2.83   0
  -3   5   9  589.42    4.93   0
  -3   5  17    3.49    2.88   0
  -1   5   8  109.33    2.94   0
   1   5  18    2.27    3.28   0
   2 -14  -7    7.94    2.47   0
   2 -10  -6   86.93    2.67   0
   2   4   5  196.38    4.55   0
   3  -7  -5   63.32    2.77   0
   3  -5  -4  180.23    3.70   0
   3   5   7   61.48    2.92   0
   3   5  18    3.04    3.12   0
   4   6  12   27.15    2.89   0
   4   6  13    1.20    2.66   0
   4   6  14    2.58    2.75   0
   5   5  18    4.35    3.29   0
   6   6  11   17.70    2.77   0
   6   6  12  102.68    3.36   0
   6   6  13    9.29    2.34   0
   6   6  14   32.61    3.18   0
   7  -9  -6  231.72    3.51   0
   7  -3  -3  111.90    3.11   0
   7   5  18    0.79    3.32   0
   8 -20  -8    1.52    2.84   0
   8   6  11   51.98    3.21   0
   8   6  12   18.33    2.93   0
   8   6  13    0.21    2.79   0
   8   6  14   15.01    2.94   0
   9 -21  -8    5.29    3.05   0
   9   5  18    3.33    3.81   0
  10 -22  -8    5.54    3.36   0
  10 -20  -8    0.83    2.86   0
  10 -18  -8    2.19    2.61   0
  10 -12  -7    6.30    2.08   0
  10   6  12   12.22    3.44   0
  10   6  13    4.39    3.24   0
  11 -21  -8    3.70    3.04   0
  11 -19  -8    1.00    2.75   0
  12 -22  -8    3.47    3.30   0
  12 -20  -8    3.99    2.94   0
  12 -18  -8    4.37    2.63   0
  12 -12  -7   19.84    2.12   0
  13 -21  -8    2.55    3.15   0
  13 -19  -8    4.50    2.74   0
  13  -3  -3  432.52    4.24   0
  13   3   3  137.94    3.95   0
  14 -22  -8    7.49    3.43   0
  14 -20  -8   11.34    3.08   0
  14 -18  -8    2.45    2.71   0
  14 -12  -7   12.69    2.26   0
  14   4   5  225.98    6.36   0
  15 -21  -8    3.85    3.22   0
  15 -19  -8    0.41    2.87   0
  15  -9  -6   82.94    2.35   0
  15  -3  -3  250.37    3.45   0
  16 -22  -8    4.51    3.17   0
  16 -20  -8    2.51    3.06   0
  16 -18  -8    4.84    2.57   0
  16 -12  -7    0.06    2.25   0
  17 -21  -8   11.08    3.02   0
  17 -19  -8    4.89    2.73   0
  17  -9  -6   30.44    2.14   0
  18 -20  -8    0.25    2.39   0
  18 -12  -7    3.77    1.67   0
  18  -2  -2  268.38    3.58   0
  19 -13  -7   13.31    2.40   0
  19  -7  -5    1.67    2.00   0
  19  -5  -4    0.91    2.07   0
  19  -1  -1  117.48    2.83   0
  19   3   4   48.10    2.87   0
  20   0   0   20.17    2.30   0
  21 -13  -7   13.71    1.82   0
  22  -4  -3   14.68    2.12   0
  22   2   3   44.00    2.44   0
  23 -15  -7   52.38    2.74   0
  24  -8  -5   55.58    2.33   0
  24  -6  -4    4.08    2.06   0
  24   4   9   32.91    3.79   0
  25 -15  -7   14.04    2.16   0
  25 -11  -6   21.31    2.16   0
  25   3   6   18.86    2.48   0
  26 -18  -7    1.90    2.75   0
  26 -16  -7   17.12    2.18   0
  26 -12  -6   34.40    2.31   0
  27 -19  -7    2.43    3.33   0
  27 -17  -7    4.23    2.13   0
  27  -9  -5   11.72    1.66   0
  27   3  15    0.45    6.48   0
  28  -4  -2    0.98    2.05   0
  28   0   2    0.88    2.18   0
  29 -13  -6   36.77    2.08   0
  29  -3  -1   77.32    2.03   0
  29  -1   1   19.38    2.18   0
  29   1   4   25.81    2.61   0
  29   3  11    1.31    3.64   0
  29   3  12   10.64    4.18   0
  30 -14  -6    2.42    2.46   0
  30  -8  -4   19.29    1.71   0
  31 -15  -6    4.94    2.56   0
  31 -11  -5   11.13    1.84   0
  31  -9  -4    3.35    2.13   0
  31  -5  -2   46.23    1.87   0
  31   1   5   28.79    2.60   0
  32 -18  -6   -0.51    3.02   0
  32 -16  -6   -0.25    2.34   0
  32 -12  -5   30.87    2.63   0
  32  -4  -1    2.39    1.64   0
  32  -2   1   23.25    2.42   0
  32   2   9   15.61    3.37   0
  32   2  10    1.31    3.73   0
  32   2  12    1.79    4.42   0
  32   2  13   -0.41    4.58   0
  33 -13  -5    6.56    2.56   0
  34 -14  -5    6.57    2.86   0
  34  -8  -3    6.43    1.70   0
  34  -4   0   -0.27    2.31   0
  34  -2   2    2.57    2.38   0
  34   0   5   29.23    2.79   0
  35 -15  -5    5.45    3.22   0
  35 -11  -4   15.23    2.33   0
  35  -9  -3    3.75    2.48   0
  35  -7  -2    5.40    2.40   0
  35  -3   1   21.79    1.98   0
  35   1   9    3.30    3.11   0
  35   1  10    7.54    3.93   0
  35   1  11    0.88    3.82   0
  36 -16  -5   -1.64    3.09   0
  36 -12  -4    2.71    2.62   0
  36  -6  -1    9.44    2.49   0
  36  -2   3   12.78    2.78   0
  36   0   7   -0.40    2.97   0
  37 -13  -4    1.47    3.05   0
  37  -5   0    7.32    1.90   0
  37  -3   2    7.49    1.89   0
  38 -14  -4    4.49    2.97   0
  38  -6   0    0.73    2.37   0
  38  -2   4   -0.49    2.57   0
  39  -5   1    8.44    2.55   0
  39  -1   8    1.73    3.69   0
  40 -10  -2    1.60    2.26   0
  40  -6   1    6.61    2.64   0
  40  -4   3    2.35    2.97   0
  41  -9  -1    2.55    2.24   0
  41  -3   5    6.10    3.18   0
  42 -12  -2    5.76    2.60   0
  42  -6   2    4.33    3.10   0
  43 -11  -1    1.97    3.06   0
  43  -9   0    5.66    2.46   0
  43  -5   4    0.24    3.35   0
  44 -10   0    4.68    3.24   0
 -38 -14   7    4.31    3.16   0
 -38 -12   8   12.26    3.31   0
 -38 -10  10    1.11    3.30   0
 -37  -9  10    0.47    2.35   0
 -36 -14   5    5.02    3.14   0
 -36 -12   6    1.53    3.00   0
 -36 -10   7   11.24    2.65   0
 -36  -8  10   12.82    2.22   0
 -35 -15   4    3.41    3.18   0
 -35  -9   7   18.53    2.90   0
 -35  -7  10    9.81    2.15   0
 -34 -16   3    5.05    3.24   0
 -34  -8   7    5.72    2.40   0
 -34  -6  10   21.43    2.74   0
 -33 -11   4    3.34    2.35   0
 -33  -7   7    2.10    2.45   0
 -33  -5  10   17.37    2.79   0
 -32 -12   3    1.70    2.58   0
 -32 -10   4   -1.48    2.50   0
 -32  -4  11   11.76    2.33   0
 -31 -17   1    2.60    3.55   0
 -31 -13   2    0.32    2.67   0
 -31  -9   4    4.49    2.32   0
 -31  -5   8   11.91    1.81   0
 -31  -3  12    2.57    2.44   0
 -31  -3  13    5.85    1.92   0
 -31  -3  14    4.99    2.08   0
 -31  -3  15    1.92    2.30   0
 -31  -3  16    6.85    3.08   0
 -30  -8   4   20.41    2.34   0
 -30  -4   8   17.08    2.42   0
 -30  -2  13    2.29    2.41   0
 -29 -17   0   13.91    3.50   0
 -29 -13   1   19.33    2.73   0
 -29  -7   4   41.14    2.52   0
 -29  -5   6   46.78    2.52   0
 -29  -3   9   33.66    1.74   0
 -28  -2  10    0.47    1.68   0
 -27 -19  -1    1.86    4.11   0
 -27 -13   0    3.63    2.86   0
 -27  -7   3   14.68    2.13   0
 -27  -3   7    5.16    1.61   0
 -27  -1  12   22.73    1.80   0
 -27  -1  17    3.82    3.09   0
 -26  -6   3    5.66    2.03   0
 -26  -4   5    5.15    1.94   0
 -26   0  13    4.42    2.18   0
 -26   0  14   27.33    2.56   0
 -26   0  15   12.44    2.64   0
 -24 -12  -1    2.18    2.80   0
 -24  -6   2   77.96    2.49   0
 -24   0  10    2.92    1.56   0
 -24   0  18    2.11    2.89   0
 -23 -11  -1    2.02    2.82   0
 -23  -7   1   11.63    2.22   0
 -23  -1   7   39.00    1.79   0
 -23   1  12   25.56    2.37   0
 -23   1  13    4.04    1.71   0
 -23   1  14    1.10    1.93   0
 -23   1  15   14.85    2.57   0
 -23   1  16    3.04    3.00   0
 -22 -10  -1   67.23    3.12   0
 -22  -8   0   43.24    2.52   0
 -22   0   8    8.38    1.63   0
 -21   1   9   23.90    2.33   0
 -21   1  18    3.05    2.39   0
 -20   2  11   13.32    2.19   0
 -20   2  12   16.91    2.22   0
 -20   2  13   23.47    1.78   0
 -20   2  15    3.72    2.00   0
 -20   2  16    4.33    2.81   0
 -20   2  17    2.81    2.68   0
 -18 -12  -3   39.04    4.20   0
 -18  -4   1  271.94    3.78   0
 -18   0   5    0.77    1.93   0
 -18   2  18    5.10    2.34   0
 -18   2  19    0.79    3.05   0
 -17 -23  -4    0.77    6.63   0
 -17  -5   0    8.04    2.10   0
 -17   1   6  109.85    2.70   0
 -17   3  12    0.73    2.15   0
 -17   3  14   26.55    2.03   0
 -17   3  15    1.78    2.42   0
 -17   3  16    8.08    2.71   0
 -16  -6  -1  131.88    3.36   0
 -16  -2   2  850.79    5.77   0
 -15   3   9  157.38    2.63   0
 -15   3  18    5.25    3.07   0
 -14   4  13   19.62    2.23   0
 -14   4  14   41.07    2.52   0
 -13 -23  -5    6.77    4.94   0
 -13   3   8   20.42    1.55   0
 -13   3  19    6.58    3.08   0
 -12   4  10   -0.01    1.93   0
 -12   4  16   12.27    2.00   0
 -10   0   2    7.63    2.36   0
 -10   4  18    2.18    3.09   0
  -9 -21  -6    5.79    3.59   0
  -9 -19  -6    1.50    3.66   0
  -9   3   6   10.21    1.56   0
  -9   5  13   45.49    2.45   0
  -9   5  14    8.63    2.25   0
  -8   2   4  149.95    2.83   0
  -8   4  19    5.67    3.29   0
  -7 -15  -6    5.09    2.96   0
  -7   5  11   81.26    2.44   0
  -7   5  15   66.48    2.30   0
  -7   5  16    1.68    2.70   0
  -6 -14  -6    7.25    2.67   0
  -6   0   1   57.15    3.54   0
  -5   5   9   43.27    2.22   0
  -5   5  17    6.55    2.90   0
  -3   5  18    0.63    3.33   0
  -2 -22  -7    2.08    3.19   0
  -2 -20  -7   17.94    3.40   0
  -2 -18  -7    4.01    2.91   0
  -1 -23  -7    0.95    3.75   0
  -1 -17  -7    2.77    2.78   0
  -1   5  18    2.96    3.05   0
   0 -16  -7    7.12    2.60   0
   0   6  12   19.28    2.52   0
   0   6  13   11.10    2.34   0
   0   6  14   76.38    3.18   0
   1 -15  -7   17.89    2.29   0
   2   6  11    6.25    2.54   0
   2   6  12   17.12    2.31   0
   2   6  13   14.66    2.41   0
   2   6  14   34.24    2.64   0
   2   6  15    4.47    3.08   0
   4   6  11    6.81    2.20   0
   4   6  15   29.38    3.25   0
   5 -13  -7   30.56    2.21   0
   5  -5  -4  147.70    3.33   0
   6   6  15    0.18    3.01   0
   8   6  15   27.16    3.25   0
   9  -9  -6   92.03    2.55   0
   9  -3  -3  320.33    3.88   0
  10   6  11   40.65    3.80   0
  10   6  14   21.05    3.30   0
  11  -9  -6   65.89    2.46   0
  11  -3  -3  333.77    3.65   0
  11   3   3   19.11    3.30   0
  11   5  18    0.50    4.31   0
  12   6  12   14.51    3.73   0
  12   6  13    8.21    3.84   0
  13  -9  -6    4.92    1.95   0
  15 -13  -7   19.13    2.47   0
  15  -7  -5  246.90    3.18   0
  15  -5  -4   61.72    2.45   0
  15   5  17    5.07    4.57   0
  16  -2  -2  867.45    5.57   0
  16   2   2   29.59    2.35   0
  17 -13  -7   12.58    2.34   0
  17  -7  -5   67.34    2.29   0
  17  -5  -4   80.46    2.09   0
  17   5  16    8.83    4.87   0
  18 -10  -6   -0.06    2.08   0
  18   0   0  107.97    2.95   0
  20 -14  -7   24.29    2.60   0
  20 -10  -6    5.88    1.58   0
  20  -4  -3   23.00    2.23   0
  22 -16  -7    4.29    2.41   0
  22  -8  -5   32.60    2.28   0
  22  -6  -4   23.22    2.28   0
  23 -17  -7    7.95    2.54   0
  23 -11  -6    2.31    2.11   0
  23  -3  -2  196.66    2.67   0
  24 -20  -7   -0.37    3.02   0
  24 -18  -7    1.22    3.01   0
  24 -16  -7    1.94    2.04   0
  24 -12  -6   11.43    2.18   0
  24  -2  -1   53.89    2.28   0
  24   0   1  116.76    2.79   0
  25 -19  -7    4.29    3.37   0
  25 -17  -7   11.10    2.13   0
  25  -9  -5   23.85    2.23   0
  25  -7  -4   41.62    2.39   0
  25  -5  -3    2.97    2.10   0
  26 -20  -7    4.86    2.65   0
  26  -4  -2   28.07    2.22   0
  27 -13  -6   21.90    2.43   0
  27   3   8    8.32    2.86   0
  28 -14  -6    8.45    2.67   0
  28 -10  -5   -0.22    1.61   0
  28  -8  -4   11.31    2.30   0
  28  -2   0    4.43    2.04   0
  29 -15  -6   28.36    3.01   0
  29 -11  -5   11.25    2.29   0
  30 -18  -6    2.30    2.87   0
  30 -16  -6   -1.18    2.75   0
  30 -12  -5    9.54    2.26   0
  30  -4  -1   52.04    2.31   0
  30   2   7   12.78    2.54   0
  31 -17  -6    3.63    2.39   0
  31  -7  -3    7.43    1.73   0
  31  -3   0   17.12    2.39   0
  31  -1   2    9.96    2.23   0
  32 -10  -4    0.52    2.37   0
  32  -8  -3   27.89    2.38   0
  32   2  11    3.96    3.89   0
  33 -15  -5    3.13    2.77   0
  33 -11  -4    2.29    2.43   0
  33  -1   3    3.75    2.36   0
  33   1   7    1.83    2.73   0
  34 -16  -5    4.02    3.32   0
  35 -17  -5   -2.25    3.26   0
  36 -14  -4   16.41    2.84   0
  36 -10  -3    3.11    1.89   0
  36  -8  -2    6.90    2.01   0
  36  -4   1   40.27    2.70   0
  36   0   8    0.59    3.37   0
  37 -15  -4   17.51    3.40   0
  37 -11  -3   -0.92    2.64   0
  37  -9  -2   11.53    2.76   0
  37  -7  -1    4.92    2.52   0
  37  -1   6    4.81    2.79   0
  38 -12  -3    8.07    2.80   0
  38 -10  -2    1.70    2.64   0
  38  -4   2    2.28    2.56   0
  39 -13  -3    5.47    3.00   0
  39  -7   0    4.47    2.83   0
  39  -3   4    5.58    2.76   0
  39  -1   9    2.81    3.40   0
  40 -14  -3    6.06    2.70   0
  40 -12  -2    2.68    2.95   0
  40  -8   0    0.55    2.64   0
  40  -2   7    0.90    3.24   0
  41 -13  -2   -0.21    3.18   0
  41  -7   1    3.06    3.08   0
  41  -5   3    5.49    3.05   0
  41  -3   6    3.49    3.20   0
  42  -8   1    5.49    2.94   0
  42  -4   5    1.75    3.32   0
  43  -7   2    0.41    2.38   0
  44  -8   2    5.67    3.06   0
  44  -6   4    2.84    3.16   0
 -39 -11   9    6.35    3.43   0
 -38 -14   6    7.61    3.59   0
 -38 -12   7    2.50    2.95   0
 -38 -10   9    1.93    3.11   0
 -38  -8  12    1.28    3.40   0
 -37 -15   5   10.29    3.50   0
 -37 -13   6    9.98    2.92   0
 -37 -11   7   -1.55    3.12   0
 -37  -9   9    1.76    2.29   0
 -37  -7  12    9.07    3.08   0
 -37  -7  13    3.90    2.56   0
 -36 -16   4    2.65    3.51   0
 -36  -8   9   11.22    2.04   0
 -36  -6  12    5.15    3.11   0
 -36  -6  13    0.16    2.48   0
 -36  -6  14    5.12    2.62   0
 -35 -17   3    0.19    3.85   0
 -35 -11   5    3.12    2.85   0
 -35  -7   9    2.18    2.05   0
 -35  -5  13    5.93    3.31   0
 -35  -5  14    8.88    3.16   0
 -34 -12   4    1.43    2.70   0
 -34 -10   5    1.74    2.68   0
 -34  -6   9    1.41    2.53   0
 -34  -4  14    0.84    3.21   0
 -34  -4  15   -0.93    3.43   0
 -33 -17   2    5.43    3.42   0
 -33  -9   5   27.51    2.66   0
 -33  -5   9   12.92    2.55   0
 -32 -14   2    2.01    2.76   0
 -32  -8   5    3.58    2.28   0
 -32  -6   7    1.16    1.88   0
 -31  -7   5   60.92    2.60   0
 -31  -5   7    2.23    2.35   0
 -31  -3  10   14.04    2.38   0
 -30 -14   1   30.28    2.88   0
 -30  -2  11    6.74    2.18   0
 -30  -2  12   43.78    2.39   0
 -30  -2  16    8.77    2.47   0
 -29  -3   8    8.49    2.26   0
 -29  -1  13   47.03    2.49   0
 -29  -1  14    5.47    2.58   0
 -29  -1  15    1.28    2.96   0
 -29  -1  16    4.51    2.83   0
 -28 -14   0    4.28    2.95   0
 -28  -6   4    4.75    2.35   0
 -28  -4   6   24.64    1.71   0
 -28  -2   9   26.29    1.70   0
 -27 -17  -1    2.61    3.59   0
 -27  -1  10   23.77    2.14   0
 -26   0  12    0.60    1.61   0
 -26   0  16    5.80    2.26   0
 -26   0  17   -0.13    3.20   0
 -25 -13  -1    2.95    2.76   0
 -25  -5   3    3.19    2.05   0
 -25  -3   5   77.96    2.37   0
 -25  -1   8   13.63    1.58   0
 -24 -16  -2    8.73    3.77   0
 -24   0   9    6.05    1.99   0
 -23  -3   4    4.83    1.44   0
 -23   1  10   17.40    2.09   0
 -23   1  11    7.23    1.65   0
 -23   1  17   10.59    2.24   0
 -23   1  18    2.02    3.32   0
 -22  -6   1   32.25    2.33   0
 -22   0   7   19.27    2.17   0
 -22   2  13   31.21    2.24   0
 -22   2  14   18.24    2.59   0
 -22   2  15    7.45    2.57   0
 -21  -9  -1   12.77    2.67   0
 -21  -7   0   11.86    2.22   0
 -21  -3   3  305.86    3.24   0
 -21  -1   5   10.36    1.97   0
 -20   0   6   39.65    1.69   0
 -20   2  18    8.80    3.47   0
 -19 -13  -3   26.22    3.97   0
 -19  -3   2  113.94    2.82   0
 -19  -1   4   17.11    2.19   0
 -19   1   7   30.71    2.03   0
 -19   3  14   26.70    2.44   0
 -19   3  15   17.03    2.44   0
 -18   2   8  115.51    2.49   0
 -17 -11  -3   54.46    4.16   0
 -17   3  10    1.63    2.16   0
 -17   3  11   12.91    1.61   0
 -17   3  17    0.23    2.63   0
 -17   3  18    4.24    2.90   0
 -16   0   4   33.94    1.76   0
 -16   2   7  208.98    3.06   0
 -15   3  19    5.79    3.37   0
 -14   2   6  123.02    2.33   0
 -14   4  11   40.51    2.30   0
 -14   4  12   44.19    2.33   0
 -14   4  15    5.47    1.89   0
 -14   4  16    2.96    2.71   0
 -13 -17  -5   16.06    4.68   0
 -13  -3   0   53.74    2.66   0
 -13   1   4   88.78    2.75   0
 -12   2   5   65.69    2.57   0
 -12   4  18   30.85    3.31   0
 -10   4   8   66.02    2.46   0
 -10   4  19    1.92    3.30   0
  -9   5  11   33.63    2.23   0
  -9   5  12   22.99    2.31   0
  -9   5  15    3.73    2.39   0
  -9   5  16    5.79    2.77   0
  -8 -22  -6    3.21    3.55   0
  -7   5  17   44.96    3.13   0
  -5   5  18    0.92    3.06   0
  -3  -9  -5   14.53    2.21   0
  -3   3   4   72.37    2.52   0
  -3   5   8   81.45    2.73   0
  -2 -12  -6   67.12    3.12   0
  -2   6  12    4.04    2.01   0
  -2   6  13    3.26    2.24   0
  -2   6  14   14.32    2.62   0
  -1 -21  -7    2.87    3.32   0
  -1 -19  -7    0.79    3.05   0
  -1   5  19   16.65    3.71   0
   0 -22  -7    1.35    3.26   0
   0  -4  -3  141.19    4.19   0
   0   4   5  318.49    5.00   0
   0   6  11   15.98    2.30   0
   0   6  15    2.99    2.62   0
   1 -23  -7    2.13    3.49   0
   1 -11  -6  177.98    3.92   0
   1   5   7  197.89    3.76   0
   1   5  19    2.66    3.40   0
   2   6  16   12.00    2.95   0
   3 -15  -7    6.87    2.30   0
   3   5  19    5.16    3.42   0
   4 -14  -7    5.24    2.03   0
   4  -2  -2  349.56    5.70   0
   4   6  10   73.73    3.16   0
   4   6  16   19.49    3.18   0
   5   5  19    2.73    3.61   0
   6 -14  -7   17.49    2.28   0
   6   6  10  135.98    3.75   0
   6   6  16    7.81    3.36   0
   7  -7  -5  698.27    5.29   0
   7  -5  -4    2.55    2.10   0
   8   6  10  144.27    4.08   0
   9 -13  -7   21.98    2.29   0
   9  -7  -5   79.74    2.66   0
   9  -5  -4   19.42    2.31   0
  10   6  15    1.29    3.11   0
  11 -13  -7    3.48    2.17   0
  11  -7  -5   10.87    2.12   0
  11  -5  -4  106.48    2.85   0
  12   6  11    3.16    3.71   0
  12   6  14    8.18    3.76   0
  13 -13  -7   22.86    1.90   0
  13  -7  -5   21.48    2.15   0
  13  -5  -4   67.51    2.58   0
  13   5  18    4.61    4.86   0
  14 -14  -7   27.46    2.38   0
  14  -2  -2  194.14    3.34   0
  15   5   8    6.44    5.33   0
  16 -14  -7   23.20    2.49   0
  16 -10  -6   20.51    2.09   0
  17  -1  -1   55.44    2.02   0
  18 -14  -7    4.53    1.76   0
  18  -4  -3    4.14    2.01   0
  18   4   6   13.61    2.77   0
  19 -15  -7   27.91    2.64   0
  20 -16  -7   25.43    2.62   0
  20  -8  -5   39.91    2.33   0
  20  -6  -4  115.14    2.58   0
  21 -21  -7    4.14    3.24   0
  21 -17  -7    8.50    2.63   0
  21  -3  -2   20.45    2.23   0
  22 -18  -7    9.54    2.88   0
  22 -12  -6   23.06    2.21   0
  22  -2  -1  176.91    3.06   0
  22   4   8   35.29    3.65   0
  23 -21  -7   -0.11    3.18   0
  23 -19  -7    2.85    2.82   0
  23  -9  -5   12.50    2.15   0
  23  -5  -3   20.95    2.16   0
  24   2   4   24.83    2.40   0
  24   4  10   12.42    3.93   0
  25 -13  -6   18.66    2.25   0
  26 -14  -6   26.27    2.81   0
  26 -10  -5   11.98    1.62   0
  26  -8  -4   38.61    2.27   0
  26  -6  -3    5.16    2.11   0
  26   0   2  118.42    2.73   0
  26   2   5   14.11    2.71   0
  27 -15  -6   17.15    2.83   0
  27 -11  -5   30.69    2.40   0
  28 -16  -6    9.09    3.08   0
  28   2   6    2.58    2.35   0
  29 -19  -6    6.09    3.19   0
  29 -17  -6    3.28    2.79   0
  29  -7  -3   54.15    2.34   0
  30 -10  -4   12.42    2.17   0
  30  -2   1    8.45    2.34   0
  30   2   8    2.76    2.92   0
  31 -13  -5   19.52    2.02   0
  31   1   6    1.78    2.67   0
  32 -14  -5   25.60    2.25   0
  33 -17  -5    1.76    3.36   0
  33  -9  -3    9.58    2.33   0
  33  -7  -2   20.70    2.26   0
  33  -3   1   35.18    2.46   0
  33   1   8   13.38    3.21   0
  34 -12  -4    0.88    1.90   0
  34 -10  -3   17.51    2.62   0
  34  -8  -2    5.37    2.36   0
  34  -6  -1   18.29    2.49   0
  34   0   6   20.79    2.75   0
  35 -13  -4   21.82    2.13   0
  35  -5   0   13.98    1.98   0
  35  -3   2   22.12    2.47   0
  36 -16  -4    2.37    3.13   0
  36  -6   0    0.95    2.38   0
  36  -2   4    7.32    2.71   0
  36   0   9    2.08    3.44   0
  37  -3   3    0.39    2.48   0
  37  -1   7    8.73    3.15   0
  38 -14  -3    0.83    3.00   0
  39 -11  -2    1.09    2.15   0
  39  -9  -1    1.41    2.20   0
  39  -5   2   15.69    2.58   0
  40 -10  -1   -0.59    2.79   0
  40  -6   2    5.40    2.78   0
  40  -4   4    2.35    3.03   0
  41 -11  -1   11.80    2.90   0
  41  -9   0    8.02    2.79   0
  42 -12  -1    4.17    3.11   0
  42 -10   0    3.54    2.96   0
  42  -6   3    4.91    2.97   0
  42  -4   6    0.71    3.36   0
  43 -11   0    0.84    3.12   0
  43  -9   1    1.98    2.49   0
  43  -7   3    6.43    3.34   0
  43  -5   5    0.79    3.25   0
 -39 -13   7    0.59    3.47   0
 -39  -9  10    1.82    3.09   0
 -39  -9  11    0.99    3.16   0
 -38 -10   8    9.98    3.12   0
 -38  -8  10    3.29    2.95   0
 -38  -8  11    2.00    2.43   0
 -37  -9   8    4.91    2.88   0
 -37  -7  10    0.27    2.66   0
 -37  -7  11   15.71    2.27   0
 -36 -12   5   26.33    3.01   0
 -36 -10   6    1.76    2.52   0
 -36  -8   8    5.48    2.58   0
 -36  -6  11   -0.04    2.17   0
 -35 -13   4   24.58    2.99   0
 -35  -9   6   -1.65    2.72   0
 -35  -7   8   17.60    2.50   0
 -35  -5  11   23.24    3.05   0
 -34 -14   3    2.52    2.97   0
 -34  -8   6   13.58    2.51   0
 -34  -6   8   18.35    2.74   0
 -34  -4  11    8.19    2.54   0
 -34  -4  12    1.09    2.53   0
 -33 -15   2    3.21    3.13   0
 -33  -7   6    9.61    2.43   0
 -33  -5   8    9.24    2.39   0
 -33  -3  12    7.12    2.51   0
 -33  -3  13   -0.00    2.77   0
 -33  -3  14   -0.40    2.76   0
 -33  -3  15    1.56    2.97   0
 -32 -18   1   10.57    3.87   0
 -32  -4   9    8.67    1.79   0
 -32  -2  14    6.73    2.72   0
 -32  -2  15   12.04    2.86   0
 -31 -15   1   12.19    3.32   0
 -31  -3   9    8.89    2.16   0
 -30  -6   5   23.61    1.79   0
 -30  -2  10   15.84    2.28   0
 -29 -15   0    1.25    3.13   0
 -29  -5   5    9.84    2.28   0
 -29  -1  11   19.11    2.24   0
 -29  -1  12    0.32    2.29   0
 -29  -1  17    2.73    3.18   0
 -28   0  14   10.73    2.40   0
 -28   0  15   -1.35    2.74   0
 -28   0  16   -0.50    2.95   0
 -27  -5   4   24.95    1.63   0
 -27  -3   6   32.03    1.77   0
 -27  -1   9   19.33    2.17   0
 -26 -14  -1    7.12    2.90   0
 -26   0  10    0.01    2.20   0
 -26   0  18    3.50    2.54   0
 -25 -19  -2   12.44    5.02   0
 -25  -1   7   28.01    2.21   0
 -25   1  12   11.71    2.30   0
 -25   1  13    8.64    2.24   0
 -25   1  14   10.83    1.96   0
 -25   1  15   22.47    2.19   0
 -25   1  16    2.48    2.70   0
 -24  -2   5   19.45    1.94   0
 -24   0   8    6.47    2.13   0
 -23  -5   2  122.30    2.33   0
 -23  -1   6    9.74    1.46   0
 -22  -2   4  148.88    2.79   0
 -22   2  17    0.09    2.94   0
 -21   1   8    7.37    1.48   0
 -20 -14  -3   14.26    4.08   0
 -20  -8  -1  187.39    3.94   0
 -20   2   9   20.33    2.24   0
 -20   2  19    0.57    3.53   0
 -19   3  12    4.48    2.11   0
 -19   3  13   26.16    1.80   0
 -19   3  16    7.82    2.53   0
 -19   3  17   11.85    3.04   0
 -17  -1   3  267.56    3.52   0
 -17   3  19   21.13    3.23   0
 -16   4  12  101.92    2.63   0
 -16   4  13   13.52    2.40   0
 -16   4  14   64.25    2.91   0
 -16   4  15   15.07    2.55   0
 -16   4  16   11.82    2.56   0
 -15   3   8   38.04    2.14   0
 -14  -2   1   66.03    2.50   0
 -14   0   3    2.79    1.52   0
 -14   4  10    6.54    2.10   0
 -14   4  17   -1.17    2.16   0
 -14   4  18    0.63    2.85   0
 -13   3   7  109.63    2.21   0
 -12  -4  -1   10.94    2.25   0
 -11   3   6   40.21    2.36   0
 -11   5  12   20.53    2.40   0
 -11   5  13   26.75    2.56   0
 -11   5  14   21.52    2.50   0
 -11   5  15   19.76    2.73   0
 -11   5  16   -1.12    2.47   0
  -9  -3  -1   23.79    3.07   0
  -9   5  10   41.66    2.25   0
  -9   5  17    2.87    2.80   0
  -8 -20  -6    2.92    3.55   0
  -8 -18  -6    4.28    3.16   0
  -8   4   7   37.77    1.83   0
  -7 -23  -6    9.86    3.99   0
  -7 -11  -5  116.89    4.31   0
  -7   5   9   18.33    2.11   0
  -7   5  18    7.76    3.15   0
  -6 -24  -6    1.02    3.98   0
  -5   5  19    4.08    3.54   0
  -4   6  12   20.81    2.11   0
  -4   6  14   16.48    2.68   0
  -4   6  15    6.41    2.40   0
  -3 -13  -6   13.34    2.70   0
  -3   5  19    1.66    3.41   0
  -2   6  11    1.52    2.12   0
  -2   6  15   31.64    2.77   0
  -2   6  16   36.18    2.75   0
  -1   5   7  350.14    4.55   0
   0 -20  -7    4.25    2.74   0
   0 -18  -7   21.85    2.78   0
   0  -6  -4  392.20    5.30   0
   0   6  10  128.32    3.30   0
   0   6  16   13.07    2.90   0
   1 -21  -7    1.10    3.11   0
   1 -17  -7   30.69    2.59   0
   2 -22  -7    2.65    3.33   0
   2 -16  -7    2.58    2.27   0
   2  -8  -5   21.78    2.41   0
   2   6  10   49.13    2.56   0
   3 -23  -7    1.05    3.45   0
   5 -15  -7   24.70    2.31   0
   6 -10  -6   18.19    1.57   0
   6  -2  -2  450.75    5.66   0
   8 -14  -7   44.14    2.39   0
   8   6  16   24.98    3.57   0
   9   3   3  898.53   13.31   0
  10 -14  -7    7.51    2.33   0
  10 -10  -6   35.56    2.19   0
  10  -2  -2   55.29    2.62   0
  10   6  10   63.08    4.02   0
  12 -14  -7   88.05    2.69   0
  12 -10  -6  123.06    2.61   0
  13 -15  -7   59.34    2.51   0
  14   2   2  685.25    6.64   0
  15 -15  -7   21.58    2.44   0
  15  -1  -1   28.63    2.32   0
  16 -16  -7   15.08    2.33   0
  16  -4  -3   99.29    2.67   0
  17 -15  -7   25.20    1.89   0
  17 -11  -6    6.70    2.29   0
  17   3   4  154.71    3.97   0
  18 -22  -7   -0.19    3.39   0
  18 -16  -7    3.77    2.46   0
  18  -6  -4   98.57    2.52   0
  19 -21  -7    0.27    3.32   0
  19 -19  -7    1.32    2.64   0
  19 -17  -7    7.14    2.56   0
  19 -11  -6    0.60    1.56   0
  19   5  11   15.77    6.22   0
  20 -20  -7    3.23    3.06   0
  20 -18  -7    4.17    2.78   0
  20 -12  -6   11.50    2.27   0
  20   2   3    4.21    2.04   0
  20   4   7    8.20    3.11   0
  21 -19  -7    1.90    2.25   0
  21  -9  -5   11.88    2.32   0
  21   3   5   67.76    2.82   0
  22   0   1    1.59    2.12   0
  23 -13  -6   17.56    2.25   0
  23  -7  -4   63.64    1.99   0
  23   3   6   21.75    2.79   0
  24 -14  -6    9.78    2.56   0
  24 -10  -5   90.72    2.47   0
  24  -4  -2   53.09    2.31   0
  24   4  13   14.49    5.86   0
  25 -15  -6   49.58    2.90   0
  25   3   7    1.01    3.00   0
  26 -16  -6   13.60    2.90   0
  26  -2   0   33.22    2.19   0
  27 -19  -6    1.83    3.16   0
  27 -17  -6    9.80    2.94   0
  27  -9  -4   15.11    2.37   0
  27  -5  -2   35.33    2.38   0
  27   1   4   91.81    2.78   0
  27   3   9   18.72    3.53   0
  28 -18  -6    5.76    2.29   0
  28 -12  -5   16.87    1.75   0
  28  -4  -1   41.12    2.48   0
  29 -13  -5   13.79    2.41   0
  29  -3   0   65.71    2.62   0
  29  -1   2   28.78    2.37   0
  29   1   5    2.98    2.32   0
  30 -14  -5    8.69    2.65   0
  30  -8  -3    5.71    2.16   0
  30  -6  -2   16.12    1.67   0
  31 -15  -5    3.36    2.66   0
  31 -11  -4   36.69    2.42   0
  31  -5  -1    1.80    2.04   0
  31  -1   3    1.65    2.21   0
  32 -18  -5    6.42    3.49   0
  32 -16  -5    4.60    2.40   0
  32 -12  -4    0.72    2.44   0
  32  -4   0   57.75    2.03   0
  32  -2   2   13.26    2.27   0
  32   0   5    9.25    2.58   0
  33 -13  -4    1.12    2.53   0
  34 -14  -4    0.01    2.73   0
  34  -4   1    4.90    2.50   0
  34  -2   3    8.87    2.25   0
  35 -17  -4    0.87    3.16   0
  35 -15  -4    6.77    2.87   0
  35 -11  -3    0.71    1.80   0
  35  -9  -2   23.57    2.69   0
  35  -7  -1    3.99    1.80   0
  36 -12  -3    5.04    2.13   0
  36 -10  -2    5.31    2.69   0
  36  -8  -1    6.74    2.61   0
  36  -4   2   14.64    2.52   0
  36   0  10   -0.18    3.76   0
  36   0  11    0.38    3.96   0
  37 -13  -3    0.94    2.15   0
  37 -11  -2   10.66    2.66   0
  37  -7   0    7.01    2.68   0
  38 -12  -2    5.21    3.14   0
  38  -6   1   -0.15    2.00   0
  38  -4   3   11.38    2.57   0
  39 -13  -2   11.22    3.28   0
  39  -7   1   12.08    2.74   0
  39  -3   5    2.05    2.68   0
  40 -14  -2    0.94    3.18   0
  40  -2   9    2.76    3.69   0
  41 -13  -1    3.31    3.14   0
  41  -7   2    2.77    3.06   0
  41  -5   4   10.62    2.92   0
  41  -3   8    0.38    3.60   0
  42  -8   2    2.36    3.16   0
  42  -6   4    1.43    2.96   0
  42  -4   7    3.19    3.58   0
  43  -9   2   -0.07    3.38   0
  43  -5   6    4.94    3.24   0
 -39 -11   8    2.50    2.44   0
 -38 -12   6    1.54    2.77   0
 -38  -8   9    3.48    2.85   0
 -38  -6  13    7.26    3.39   0
 -37 -13   5    2.12    3.11   0
 -37 -11   6   30.87    3.08   0
 -37  -9   7    5.08    2.66   0
 -37  -7   9    6.20    2.73   0
 -37  -5  13   -1.74    3.08   0
 -36 -14   4   13.71    3.21   0
 -36  -8   7    0.58    2.57   0
 -36  -6  10    3.18    2.09   0
 -36  -4  14    1.26    3.09   0
 -35 -15   3    1.71    3.16   0
 -35  -7   7   15.47    2.37   0
 -35  -5  10   13.81    2.66   0
 -34 -18   2    5.10    3.62   0
 -34  -4  10   41.92    2.89   0
 -33  -3  11   16.80    2.69   0
 -32 -10   3    9.65    2.60   0
 -32  -6   6    0.98    1.78   0
 -32  -4   8    3.09    2.41   0
 -32  -2  16    2.98    2.53   0
 -31 -11   2    6.46    2.63   0
 -31  -9   3   10.73    2.50   0
 -31  -5   6   11.96    2.30   0
 -31  -1  15    0.77    3.14   0
 -30 -18   0    1.36    3.75   0
 -30 -10   2    4.64    2.39   0
 -30  -8   3    3.67    2.27   0
 -30  -2   9   44.78    2.45   0
 -29 -11   1   17.29    2.80   0
 -29  -9   2   15.24    2.38   0
 -29  -3   7   19.06    1.66   0
 -29  -1  10   65.31    2.56   0
 -28 -10   1    0.61    2.20   0
 -28  -4   5   23.72    2.25   0
 -28   0  12    1.68    2.41   0
 -28   0  13    4.23    1.83   0
 -28   0  17    9.03    3.13   0
 -27  -9   1   49.64    2.50   0
 -27  -1   8   21.38    2.17   0
 -26  -4   4   22.85    1.67   0
 -26  -2   6   69.25    2.41   0
 -26   0   9    1.84    2.13   0
 -25 -21  -2    1.89    5.83   0
 -25   1  11    2.54    2.09   0
 -25   1  18    8.56    3.04   0
 -24  -4   3   10.40    1.45   0
 -24   2  13   13.35    2.33   0
 -24   2  14    6.80    2.70   0
 -24   2  15    5.62    2.69   0
 -24   2  16    5.53    2.76   0
 -23   1   9   11.04    1.58   0
 -22  -4   2  207.16    3.21   0
 -22   2  10  107.11    2.51   0
 -22   2  18    6.51    2.51   0
 -21  -5   1  108.92    2.68   0
 -21   1   7   56.99    2.19   0
 -21   3  13   47.09    2.59   0
 -21   3  14    4.17    2.52   0
 -21   3  15    2.21    2.84   0
 -21   3  16    0.55    2.55   0
 -20  -6   0  233.83    3.73   0
 -20   0   5  192.20    2.89   0
 -19   1   6   67.21    2.41   0
 -19   3  10   48.27    2.27   0
 -19   3  11  126.14    2.20   0
 -19   3  18   12.74    3.27   0
 -18   2   7  108.30    2.58   0
 -17  -3   1   45.09    2.30   0
 -17   1   5   26.92    2.22   0
 -17   3   9   16.05    1.65   0
 -16 -10  -3   41.32    3.88   0
 -16   2   6  280.35    3.37   0
 -16   4  11   14.42    2.25   0
 -16   4  17    5.10    2.95   0
 -15  -7  -2  112.82    3.79   0
 -15  -1   2   17.07    2.13   0
 -14   4  19    2.54    2.99   0
 -13 -21  -5   -0.15    4.28   0
 -13   5  14    3.92    2.50   0
 -13   5  15   13.26    2.46   0
 -12   4   8    3.67    2.06   0
 -11   1   3  140.50    2.75   0
 -11   5  17   16.47    2.99   0
  -9  -9  -4  128.33    6.34   0
  -9   3   5    5.13    2.15   0
  -9   5  18    1.66    3.09   0
  -7 -21  -6    8.18    3.82   0
  -7 -17  -6   36.91    3.45   0
  -7   1   2  338.87    5.10   0
  -7   5  19    4.82    3.40   0
  -6 -16  -6   28.47    3.27   0
  -6   2   3  369.48    4.64   0
  -6   4   6   11.24    2.13   0
  -6   6  12   15.95    2.14   0
  -6   6  13   35.39    2.45   0
  -6   6  14   38.09    2.73   0
  -6   6  15   18.45    2.65   0
  -5   3   4  309.76    4.51   0
  -5   5   8  141.57    2.66   0
  -4 -14  -6   19.76    2.73   0
  -4   6  11   21.85    2.32   0
  -4   6  16    7.21    2.76   0
  -2   4   5   41.53    2.58   0
  -2   6  10    4.22    2.17   0
  -2   6  17    1.00    2.99   0
   0 -12  -6   32.96    2.45   0
   0   6  17    6.70    2.90   0
   1 -19  -7   14.26    2.80   0
   2 -20  -7   15.68    2.83   0
   2 -18  -7    1.13    2.55   0
   2   6  17    1.48    2.93   0
   3 -21  -7   20.00    3.49   0
   3 -19  -7   23.90    2.96   0
   3 -17  -7    8.01    2.38   0
   3 -11  -6   39.07    2.56   0
   3   3   3  728.53   12.21   0
   4 -22  -7    1.99    3.19   0
   4 -16  -7   24.51    2.54   0
   4  -8  -5   28.18    2.26   0
   4   6   9   16.61    2.65   0
   4   6  17    7.05    3.09   0
   5 -23  -7    4.15    3.40   0
   5 -17  -7   33.84    2.94   0
   6 -16  -7   10.75    2.47   0
   6   6   9    5.61    2.50   0
   6   6  17    3.13    3.45   0
   7 -23  -7    0.83    3.40   0
   7 -15  -7    1.72    2.13   0
   8  -2  -2  284.12    4.07   0
   8   6  17    2.03    3.70   0
   9 -23  -7    9.38    3.12   0
  10 -16  -7    2.84    2.21   0
  10   6  16    6.71    3.53   0
  11 -15  -7   -2.11    2.19   0
  12 -16  -7   72.96    2.67   0
  12   6  15   16.00    3.69   0
  13 -23  -7    6.81    3.51   0
  13 -11  -6   52.47    2.24   0
  13  -1  -1   51.81    2.53   0
  14 -22  -7    4.54    3.30   0
  14 -16  -7   24.65    2.57   0
  14   0   0    0.48    2.11   0
  14   6  13    4.83    4.39   0
  15 -21  -7    0.98    2.93   0
  15 -19  -7   -1.33    2.54   0
  15 -17  -7    5.48    2.44   0
  16 -22  -7    2.74    3.04   0
  16 -20  -7    5.85    3.01   0
  16  -8  -5    0.07    1.47   0
  16  -6  -4   13.18    2.18   0
  17 -21  -7   17.22    2.95   0
  17 -19  -7    8.63    2.94   0
  17 -17  -7    7.38    1.80   0
  17   5   9   19.59    5.52   0
  18 -20  -7    0.65    2.76   0
  18 -18  -7    2.96    2.11   0
  18 -12  -6    5.05    2.20   0
  19  -9  -5   24.98    2.29   0
  20  -2  -1   53.59    2.50   0
  21 -13  -6   -0.25    2.16   0
  21  -7  -4   18.75    1.76   0
  21  -1   0   19.26    2.27   0
  22 -14  -6   19.59    2.55   0
  22 -10  -5    3.22    2.08   0
  23 -15  -6   31.06    2.72   0
  24 -16  -6    9.01    2.90   0
  24  -8  -4   22.71    2.16   0
  24  -6  -3   11.95    2.14   0
  24   4  11    2.69    3.98   0
  24   4  12    1.13    4.89   0
  25 -19  -6    5.19    2.82   0
  25 -17  -6    1.55    2.85   0
  25 -11  -5   51.15    1.91   0
  25  -1   1   83.45    2.50   0
  26 -20  -6    0.89    3.03   0
  26 -18  -6    0.71    2.73   0
  27 -13  -5   25.31    2.45   0
  27  -7  -3   15.07    1.66   0
  28 -14  -5   47.74    2.74   0
  28  -6  -2    3.94    2.05   0
  28  -2   1   16.69    2.21   0
  28   2   7   20.78    2.85   0
  29 -15  -5   14.01    2.84   0
  29 -11  -4   13.29    2.28   0
  30 -18  -5    3.69    2.95   0
  30 -16  -5    4.90    2.99   0
  30   2   9    3.10    3.01   0
  31 -19  -5    2.58    3.34   0
  31 -17  -5    2.61    2.32   0
  31  -9  -3   11.73    1.73   0
  31  -7  -2   51.25    1.98   0
  31  -3   1    6.77    2.30   0
  31   1   7    3.91    2.71   0
  32  -8  -2   27.89    2.36   0
  32  -6  -1   43.08    2.39   0
  33 -15  -4    1.93    2.89   0
  33 -11  -3   20.93    2.52   0
  33  -5   0   38.10    1.89   0
  33  -3   2   28.96    2.56   0
  33   1   9    1.08    2.92   0
  33   1  10    2.67    3.41   0
  34 -16  -4    0.07    3.25   0
  34 -12  -3   18.05    2.63   0
  34   0   7   -0.78    2.71   0
  35 -13  -3    0.19    2.66   0
  35  -5   1    9.79    2.45   0
  35  -3   3    6.28    2.56   0
  35  -1   6    7.54    2.72   0
  36 -14  -3    6.22    3.08   0
  36  -2   5   12.79    2.63   0
  37 -15  -3    3.98    2.46   0
  37  -9  -1    6.25    2.07   0
  37  -5   2    3.80    2.59   0
  37  -3   4    8.36    2.59   0
  37  -1   8    2.89    3.18   0
  38 -10  -1   19.38    2.79   0
  38  -8   0    4.00    2.05   0
  38  -2   7    6.79    3.07   0
  39 -11  -1    3.37    2.80   0
  39  -9   0    3.19    2.69   0
  39  -5   3    5.47    2.67   0
  39  -3   6   10.11    3.06   0
  40 -12  -1    2.80    2.50   0
  40 -10   0    6.18    3.06   0
  40  -8   1    2.05    2.14   0
  40  -6   3    0.19    2.93   0
  40  -4   5    6.75    2.80   0
  41 -11   0    5.18    3.00   0
  41  -9   1   11.12    2.85   0
  41  -5   5   -0.67    3.20   0
  42 -12   0    0.61    2.53   0
  42 -10   1    4.61    3.04   0
  43  -7   4    1.88    3.07   0
 -40 -10   9    1.18    3.51   0
 -40  -8  11   -0.17    3.51   0
 -39 -13   6    0.20    3.45   0
 -39 -11   7    6.29    3.26   0
 -39  -9   9   12.43    2.45   0
 -39  -7  11   -0.55    3.26   0
 -39  -7  12   -1.42    2.40   0
 -38 -14   5    1.35    3.28   0
 -38 -10   7   19.17    2.84   0
 -38  -6  11    2.90    3.13   0
 -38  -6  12    2.65    2.36   0
 -37 -15   4   14.88    3.57   0
 -37  -5  12   13.54    2.93   0
 -36 -16   3    1.17    3.54   0
 -36  -4  12    2.89    2.99   0
 -36  -4  13    2.60    2.90   0
 -35 -11   4   14.87    2.84   0
 -35  -9   5    0.65    2.37   0
 -35  -3  13    2.27    3.16   0
 -35  -3  14    4.49    3.34   0
 -35  -3  15    2.79    3.15   0
 -34 -16   2   -1.05    3.23   0
 -34 -12   3   16.31    2.80   0
 -34 -10   4    0.76    2.59   0
 -34  -8   5    7.99    2.45   0
 -34  -6   7   35.66    2.01   0
 -34  -4   9   -0.63    2.51   0
 -34  -2  15    1.17    3.03   0
 -33 -11   3   21.81    2.46   0
 -33  -9   4    3.27    2.37   0
 -33  -5   7   -0.07    2.50   0
 -33  -3  10    2.23    2.49   0
 -32 -16   1    5.14    3.07   0
 -32 -12   2   10.02    2.72   0
 -32  -8   4    7.77    2.21   0
 -32  -2  11    4.27    2.40   0
 -31  -7   4   16.12    2.37   0
 -31  -3   8    2.74    1.62   0
 -31  -1  12    1.67    2.45   0
 -31  -1  13    3.71    1.91   0
 -30 -16   0    6.02    3.47   0
 -30 -12   1   43.33    2.78   0
 -30  -6   4   35.30    2.50   0
 -30  -4   6    2.73    1.63   0
 -30   0  14    6.27    2.53   0
 -30   0  15    2.80    3.04   0
 -30   0  16    4.39    2.95   0
 -29  -7   3   50.86    2.03   0
 -29  -1   9   28.69    2.27   0
 -28 -20  -1    1.78    4.40   0
 -28 -18  -1    5.13    3.85   0
 -28  -6   3   65.76    2.53   0
 -28  -2   7    0.43    1.54   0
 -28   0  10   13.71    2.17   0
 -27 -15  -1   15.62    3.31   0
 -27 -11   0    2.20    2.52   0
 -27  -3   5   40.85    2.32   0
 -27   1  12   21.85    2.33   0
 -27   1  13    3.73    2.38   0
 -27   1  14    2.57    2.00   0
 -27   1  15    3.07    2.02   0
 -27   1  16    3.29    2.29   0
 -27   1  17   -0.78    3.21   0
 -26 -10   0    8.81    2.70   0
 -26  -8   1    3.35    2.11   0
 -26  -6   2   12.09    2.03   0
 -25 -17  -2   10.06    4.25   0
 -25  -9   0   12.37    2.70   0
 -25  -7   1   22.76    2.31   0
 -25  -3   4    8.29    2.00   0
 -25  -1   6   19.70    2.19   0
 -25   1  10   30.61    1.86   0
 -24   0   7    0.09    2.13   0
 -24   2  11   26.12    2.18   0
 -24   2  12   45.98    2.36   0
 -24   2  18   10.68    3.58   0
 -23 -13  -2    9.23    3.23   0
 -23  -1   5  167.51    2.83   0
 -23   1   8   29.63    2.29   0
 -22 -18  -3    4.52    6.09   0
 -22 -12  -2   22.53    3.13   0
 -22   2   9   77.68    2.45   0
 -21 -11  -2   14.21    2.86   0
 -21  -1   4   99.95    2.60   0
 -21   3  12   12.19    1.66   0
 -21   3  18    0.21    3.06   0
 -20 -10  -2   36.78    3.04   0
 -20   2   8  115.48    2.15   0
 -19  -7  -1  189.78    3.72   0
 -19   3  19    4.10    3.29   0
 -18   0   4  141.41    2.80   0
 -18   4  12    2.08    2.24   0
 -18   4  13   11.33    2.28   0
 -18   4  14   29.72    2.02   0
 -18   4  15    3.72    1.90   0
 -18   4  17    9.77    3.08   0
 -17   3   8    6.73    2.02   0
 -16   4  10   26.07    2.27   0
 -16   4  18   12.37    2.98   0
 -16   4  19    5.97    3.16   0
 -15  -5  -1   19.47    2.17   0
 -15   1   4   67.88    2.49   0
 -15   3   7   32.43    2.18   0
 -14   2   5   60.72    2.46   0
 -14   4   9    3.28    1.40   0
 -13 -19  -5    0.50    4.26   0
 -13   3   6   17.98    2.11   0
 -13   5  11    6.61    2.11   0
 -13   5  12   17.30    2.28   0
 -13   5  16   12.08    2.63   0
 -13   5  17    4.84    2.94   0
 -12 -16  -5   39.60    4.66   0
 -12   0   2  596.62    5.36   0
 -11   5  10   28.29    2.13   0
 -11   5  18    3.46    3.17   0
 -10   4   7  243.59    3.06   0
  -9   5   9   97.10    2.47   0
  -8 -12  -5   71.57    3.85   0
  -8   6  13    3.56    2.30   0
  -8   6  14    0.08    2.48   0
  -8   6  15    1.52    2.62   0
  -7 -19  -6    3.99    3.18   0
  -6 -22  -6    7.43    3.75   0
  -6   6  11   12.19    2.19   0
  -6   6  16    6.22    2.73   0
  -6   6  17    2.42    3.12   0
  -5 -23  -6    2.83    3.65   0
  -5 -15  -6    4.00    2.82   0
  -4 -24  -6    4.87    4.02   0
  -4   6  17    6.38    2.98   0
  -2   6  18    1.03    3.41   0
  -1 -13  -6   19.07    2.70   0
  -1  -9  -5  193.92    3.69   0
   0   2   2   68.18    4.28   0
   0   6   9   17.62    2.56   0
   0   6  18    6.95    3.19   0
   2 -12  -6   99.27    3.15   0
   2  -6  -4  450.93    5.15   0
   2  -4  -3   68.07    2.69   0
   2   6   9   77.82    2.89   0
   2   6  18    2.16    3.25   0
   4 -20  -7   22.50    2.87   0
   4 -18  -7   48.15    2.87   0
   4   6  18   19.14    3.95   0
   5 -21  -7    2.46    3.01   0
   5 -19  -7   21.10    2.81   0
   5 -11  -6   11.60    2.07   0
   6 -22  -7    8.28    2.88   0
   6 -20  -7   11.34    2.77   0
   6 -18  -7    2.89    2.51   0
   6  -8  -5   20.05    2.35   0
   6   6  18    3.40    3.79   0
   7 -21  -7    1.44    2.90   0
   7 -19  -7   19.39    2.66   0
   7 -17  -7    3.41    2.58   0
   7 -11  -6   30.25    2.27   0
   7   3   3  837.61   20.60   0
   8 -22  -7    3.17    3.25   0
   8 -18  -7   11.47    2.58   0
   8  -8  -5   49.28    2.51   0
   8   6   9   -0.11    2.71   0
   9 -21  -7    4.25    2.97   0
   9 -19  -7    6.13    2.43   0
   9 -11  -6    5.50    2.04   0
  10 -22  -7    3.00    3.25   0
  10 -20  -7    0.58    2.82   0
  10 -18  -7    4.16    2.69   0
  11 -21  -7    1.93    3.07   0
  11 -19  -7    0.82    2.73   0
  11 -17  -7    3.27    2.44   0
  11  -1  -1  519.25    5.25   0
  12 -22  -7    5.11    3.07   0
  12 -20  -7   33.60    3.07   0
  12 -18  -7   14.46    2.76   0
  12  -4  -3  190.38    3.38   0
  12   2   2   45.50    2.81   0
  12   6  16    3.46    4.06   0
  13 -21  -7    9.48    2.84   0
  13 -19  -7    4.30    2.75   0
  14 -20  -7   10.40    2.75   0
  14 -18  -7    4.97    2.49   0
  14  -6  -4   27.58    2.25   0
  14   6  12   42.21    4.98   0
  14   6  14    0.09    4.05   0
  16 -12  -6   36.36    2.34   0
  17  -3  -2    3.67    2.24   0
  17   5  17    0.43    5.21   0
  18   2   3   12.73    2.35   0
  19 -13  -6    4.50    2.14   0
  19  -5  -3  232.34    3.11   0
  20 -10  -5   13.99    2.20   0
  21 -15  -6   19.75    2.58   0
  22 -16  -6   17.05    2.69   0
  22  -8  -4    1.98    2.09   0
  22  -6  -3   23.37    2.19   0
  22  -4  -2  207.00    2.64   0
  22   2   4   73.51    2.84   0
  23 -21  -6    4.17    3.35   0
  23 -19  -6    3.01    2.71   0
  23 -17  -6    8.41    2.82   0
  23 -11  -5   -0.30    1.92   0
  23  -3  -1   28.90    2.23   0
  24 -20  -6    2.47    3.33   0
  24 -18  -6    4.82    2.62   0
  24 -12  -5   30.60    2.34   0
  24  -2   0    3.96    2.08   0
  24   0   2   14.70    2.13   0
  25 -13  -5   25.99    2.29   0
  25  -9  -4   29.64    1.74   0
  25  -7  -3   33.57    2.43   0
  25  -5  -2   52.99    1.92   0
  26 -10  -4    9.84    2.23   0
  26   2   6   43.41    2.93   0
  27 -15  -5    7.34    2.43   0
  27  -3   0   52.15    2.36   0
  27   3  10   16.03    3.28   0
  27   3  14    2.35    5.14   0
  28 -16  -5   11.03    2.94   0
  28  -8  -3   60.96    1.83   0
  29 -19  -5    2.71    3.17   0
  29 -17  -5    5.58    3.00   0
  29  -9  -3   27.82    2.40   0
  30 -12  -4   30.37    1.95   0
  30  -2   2   44.89    2.51   0
  30   2  10    6.20    3.22   0
  30   2  14    1.27    4.77   0
  31 -13  -4   15.83    1.88   0
  32 -16  -4   -0.62    2.85   0
  32 -14  -4    2.70    1.95   0
  32  -4   1   63.53    2.70   0
  32  -2   3   31.68    2.50   0
  32   0   6   10.69    2.59   0
  33 -17  -4    1.59    3.31   0
  33  -9  -2    0.13    2.24   0
  33  -7  -1    0.84    1.73   0
  33   1  11    0.97    3.64   0
  33   1  12    5.85    4.02   0
  34 -10  -2   13.82    2.57   0
  34  -8  -1   24.97    2.55   0
  34  -6   0    4.23    1.74   0
  34  -2   4    2.99    2.47   0
  34   0   8    3.54    3.16   0
  35 -15  -3    3.38    2.81   0
  35 -11  -2   -1.20    2.54   0
  35  -7   0   26.58    2.63   0
  36 -12  -2    3.33    2.87   0
  36  -6   1    7.03    2.51   0
  36  -4   3    5.67    2.41   0
  37 -13  -2    9.41    3.06   0
  37  -7   1    1.10    2.43   0
  37  -3   5   10.74    2.54   0
  37  -1   9    0.52    3.20   0
  37  -1  10    4.44    3.56   0
  38 -14  -2    4.10    2.45   0
  38  -6   2   25.31    2.61   0
  38  -4   4    4.22    2.57   0
  38  -2   8   -0.21    2.96   0
  39 -13  -1    0.83    3.03   0
  39  -7   2   -2.00    2.86   0
  39  -5   4    5.90    2.72   0
  40 -14  -1   -0.27    3.56   0
  40  -8   2    0.73    2.84   0
  40  -4   6    0.98    3.08   0
  41 -13   0    5.53    3.10   0
  41  -7   3    1.99    2.83   0
  42  -8   3    0.14    3.23   0
  42  -6   5    4.98    3.11   0
  43  -9   3    1.09    3.37   0
  43  -7   5   -0.00    3.51   0
 -40 -12   7    4.78    3.46   0
 -40 -10   8    1.44    3.24   0
 -39  -9   8   15.49    3.13   0
 -39  -7  10    0.24    3.17   0
 -38  -6  10    6.10    2.99   0
 -37 -11   5    3.07    2.95   0
 -37  -9   6   18.95    2.77   0
 -37  -7   8    0.45    2.54   0
 -37  -5  10    1.34    2.62   0
 -37  -5  11    3.01    2.19   0
 -36 -12   4    3.83    2.91   0
 -36 -10   5    4.20    2.52   0
 -36  -8   6   -0.40    2.78   0
 -36  -6   8   15.45    2.68   0
 -36  -4  11    3.35    2.79   0
 -35 -13   3    1.53    2.95   0
 -35  -7   6   11.44    2.34   0
 -35  -5   8    7.72    2.70   0
 -35  -3  11   10.53    2.64   0
 -35  -3  12   -0.15    2.67   0
 -34  -2  12    4.36    2.56   0
 -34  -2  13   11.17    2.86   0
 -34  -2  14    5.40    2.22   0
 -33 -13   2    0.42    2.76   0
 -33  -3   9    6.94    2.64   0
 -33  -1  14    2.50    2.72   0
 -33  -1  15    2.55    3.22   0
 -33  -1  16    7.43    3.20   0
 -32  -4   7    4.45    1.80   0
 -32  -2  10    4.57    1.84   0
 -31 -13   1    7.87    2.75   0
 -31  -5   5   50.79    2.54   0
 -31  -3   7   18.76    2.26   0
 -31  -1  11    2.11    1.74   0
 -30  -2   8   21.22    1.82   0
 -30   0  12    2.50    2.41   0
 -30   0  13    0.05    1.83   0
 -30   0  17    4.11    2.61   0
 -29  -5   4    3.38    2.28   0
 -29  -3   6   32.44    1.73   0
 -29   1  15    2.92    2.69   0
 -29   1  16    3.47    3.08   0
 -28 -12   0    0.64    2.36   0
 -27  -5   3    2.51    2.02   0
 -27  -1   7    9.54    2.16   0
 -26  -2   5   10.72    2.02   0
 -26   0   8    7.12    1.61   0
 -26   2  13    2.83    2.39   0
 -26   2  14   28.51    2.74   0
 -26   2  15    4.09    2.97   0
 -26   2  17   -0.02    2.93   0
 -25  -5   2   55.45    2.28   0
 -25   1   9   76.63    2.35   0
 -24  -8   0   26.70    2.39   0
 -24  -6   1   85.65    2.60   0
 -24  -2   4   28.06    2.00   0
 -24   2  10   29.00    2.16   0
 -23   3  13    0.88    2.33   0
 -23   3  14    4.80    2.47   0
 -23   3  15   16.44    2.70   0
 -23   3  16    4.94    2.94   0
 -23   3  17   13.51    2.98   0
 -21 -15  -3    8.44    4.37   0
 -21  -3   2   22.40    2.20   0
 -21   3  10    1.85    1.95   0
 -20   4  13    2.54    2.25   0
 -20   4  14   10.36    2.53   0
 -20   4  15   12.28    2.54   0
 -20   4  16    0.79    2.54   0
 -19  -9  -2  143.03    4.23   0
 -19  -5   0  141.99    3.12   0
 -19  -1   3   41.82    2.34   0
 -19   3   9   57.27    1.97   0
 -18   4  11    8.96    2.11   0
 -18   4  18    1.00    3.20   0
 -16   0   3   97.89    2.71   0
 -15   5  12    3.27    2.36   0
 -15   5  13   14.51    2.21   0
 -15   5  15   20.87    1.93   0
 -15   5  16    0.43    2.85   0
 -14   4   8  429.88    3.79   0
 -13   5  18    0.15    3.16   0
 -12 -22  -5    7.49    4.29   0
 -11   5  19    2.13    3.46   0
 -10   6  13   29.93    2.41   0
 -10   6  14   58.76    2.67   0
 -10   6  15   11.39    2.80   0
  -8   0   1    8.11    2.71   0
  -8   4   6   21.57    2.18   0
  -8   6  11   41.41    2.22   0
  -8   6  12   20.00    2.19   0
  -8   6  16   15.70    2.56   0
  -8   6  17    3.93    2.89   0
  -7  -1   0   17.60    2.86   0
  -6 -20  -6    9.05    3.24   0
  -6 -18  -6    3.59    2.87   0
  -6   6  10   98.75    2.63   0
  -5   5   7   96.95    2.75   0
  -4   4   5   49.90    2.46   0
  -4   6  18   25.44    3.25   0
  -3  -7  -4  101.32    3.81   0
  -2 -14  -6   63.77    3.06   0
  -2   6   9  106.20    2.94   0
  -1   1   1  270.13    7.80   0
   3  -1  -1  354.77    6.61   0
   4 -12  -6   14.84    2.25   0
   4  -6  -4  404.48    4.66   0
   6  -4  -3  144.27    3.45   0
   8  -4  -3  237.24    3.75   0
   8   6  18    1.30    4.11   0
  10 -12  -6   63.67    2.34   0
  10  -6  -4  282.71    3.62   0
  10  -4  -3    5.10    2.20   0
  10   6  17    9.79    3.84   0
  12 -12  -6   33.34    2.27   0
  12   0   0  529.39    5.43   0
  12   6  10   43.47    4.73   0
  14 -12  -6   25.26    1.74   0
  15 -13  -6    4.31    2.31   0
  15  -3  -2   80.14    2.77   0
  17 -13  -6   21.00    1.80   0
  17  -7  -4  135.49    2.81   0
  17  -5  -3   10.91    2.05   0
  18 -14  -6   15.43    2.42   0
  18 -10  -5   32.21    2.40   0
  18  -2  -1  208.30    3.04   0
  19 -15  -6    3.27    2.50   0
  19  -1   0   64.27    2.58   0
  19   3   5   13.14    2.55   0
  20 -22  -6    9.22    3.24   0
  20 -16  -6    9.49    2.60   0
  20  -8  -4   12.12    2.11   0
  20  -4  -2    5.39    2.09   0
  21 -21  -6    2.96    3.30   0
  21 -19  -6    5.18    2.67   0
  21 -17  -6    2.57    2.55   0
  21 -11  -5    6.67    2.10   0
  22 -20  -6   -0.31    2.84   0
  22 -18  -6    2.92    2.52   0
  22 -12  -5    9.30    2.08   0
  22   4   9    0.24    3.38   0
  23  -9  -4   69.30    2.48   0
  23  -5  -2  125.51    2.66   0
  23  -1   1    5.16    2.08   0
  24   2   5    9.18    2.22   0
  25   1   4   23.24    2.35   0
  25   3   8   24.86    3.22   0
  26 -14  -5   30.60    2.05   0
  26  -8  -3   33.45    2.35   0
  26  -6  -2   15.22    2.14   0
  27 -19  -5    4.34    2.84   0
  27 -17  -5    1.33    2.88   0
  27 -11  -4   18.54    2.20   0
  27   1   5   29.88    2.67   0
  27   3  11    4.81    3.68   0
  27   3  13   -0.01    4.46   0
  28 -20  -5   -0.13    2.98   0
  28 -18  -5    3.39    2.86   0
  28 -12  -4   15.24    2.32   0
  29 -13  -4   10.07    2.36   0
  29  -3   1    9.45    2.29   0
  29   1   6    3.51    2.31   0
  30 -14  -4   28.47    2.59   0
  30 -10  -3    4.00    1.65   0
  30  -8  -2    7.18    2.22   0
  30   0   5   75.25    2.84   0
  30   2  11   13.77    3.55   0
  30   2  12    1.56    3.90   0
  30   2  13    1.04    4.36   0
  31 -17  -4    5.47    2.90   0
  31 -15  -4   -0.16    2.61   0
  31 -11  -3    5.44    2.22   0
  31  -5   0    0.22    2.18   0
  31   1   8    0.84    3.09   0
  32 -18  -4   -1.20    3.09   0
  32 -12  -3   -0.38    2.42   0
  33 -13  -3   25.83    2.45   0
  33  -5   1   36.02    2.42   0
  34 -14  -3    2.68    1.98   0
  34  -4   2    9.67    1.81   0
  34   0   9    1.41    3.10   0
  35 -17  -3    2.56    3.41   0
  35  -9  -1   26.22    2.09   0
  35  -5   2   23.92    2.46   0
  35  -3   4    9.56    2.76   0
  35  -1   7    5.71    2.77   0
  36 -14  -2    1.36    2.78   0
  36 -10  -1    8.16    1.99   0
  36  -8   0   10.26    1.89   0
  37 -15  -2    0.81    3.32   0
  37 -11  -1   14.63    2.23   0
  37  -9   0    5.20    2.88   0
  37  -5   3    5.53    2.74   0
  38 -12  -1    1.45    2.12   0
  38 -10   0   22.98    2.96   0
  38  -8   1   -0.47    2.56   0
  38  -4   5    0.35    2.56   0
  38  -2   9    4.55    3.29   0
  39 -11   0   -1.33    3.16   0
  39  -9   1    3.15    2.87   0
  39  -3   8    9.36    3.58   0
  40 -12   0    3.17    2.92   0
  40 -10   1   -0.02    2.96   0
  40  -6   4    4.62    2.95   0
  40  -4   7   15.90    3.34   0
  41 -11   1    1.54    2.90   0
  41  -9   2    1.25    2.37   0
  41  -7   4    4.67    3.18   0
  41  -5   6    2.23    3.08   0
  42 -10   2    1.55    2.53   0
  42  -8   4    4.93    3.12   0
  42  -6   6    2.62    3.50   0
 -41  -9   9    0.27    3.18   0
 -40  -8   9    6.08    3.29   0
 -40  -6  12    0.33    3.30   0
 -39 -13   5    1.96    3.52   0
 -39 -11   6   17.66    3.17   0
 -39  -7   9    1.57    3.13   0
 -39  -5  12    3.88    3.25   0
 -38 -12   5    1.84    2.84   0
 -38 -10   6    5.87    2.77   0
 -38  -8   7   13.04    2.68   0
 -38  -6   9    1.17    2.85   0
 -38  -4  13    7.31    3.39   0
 -37 -13   4    1.17    2.82   0
 -37  -7   7   11.52    2.60   0
 -37  -3  14    3.66    3.39   0
 -36 -14   3    4.51    3.13   0
 -36  -4  10    5.44    2.61   0
 -35 -17   2    9.81    3.52   0
 -35  -3  10    6.70    2.51   0
 -34 -14   2    0.81    2.94   0
 -34  -6   6   15.52    1.91   0
 -34  -4   8   11.46    2.32   0
 -34  -2  11    0.84    2.55   0
 -33 -17   1    1.97    3.33   0
 -33  -5   6   14.16    2.56   0
 -33  -3   8   15.74    2.32   0
 -33  -1  12    7.77    2.54   0
 -33  -1  13   22.45    1.99   0
 -32 -14   1    0.54    2.74   0
 -32  -2   9   17.15    2.25   0
 -32   0  14    3.70    2.58   0
 -32   0  15    9.66    3.21   0
 -32   0  16    0.02    3.46   0
 -31 -19   0    1.61    4.02   0
 -31 -17   0    3.48    4.12   0
 -31  -1  10   16.45    1.73   0
 -30  -2   7   39.02    2.26   0
 -30   0  11    9.12    2.18   0
 -29 -13   0   61.06    2.98   0
 -29  -1   8    2.76    2.19   0
 -29   1  12    0.01    2.32   0
 -29   1  13   44.34    2.53   0
 -29   1  14    8.07    2.04   0
 -29   1  17    2.41    2.49   0
 -28 -16  -1    8.85    3.49   0
 -28  -4   4   24.99    2.25   0
 -28  -2   6   13.35    2.09   0
 -28   0   9   59.85    1.92   0
 -27   1  10   20.79    2.27   0
 -26  -4   3   14.65    2.07   0
 -26   2  12    9.73    1.80   0
 -25 -11  -1    3.41    2.78   0
 -25   1   8   13.66    2.17   0
 -24 -14  -2   23.68    3.45   0
 -24 -10  -1    1.37    2.64   0
 -24   0   6    3.91    2.02   0
 -23  -7   0  104.11    3.00   0
 -23   1   7   36.80    2.19   0
 -23   3  11   67.60    2.47   0
 -23   3  12   11.27    1.75   0
 -23   3  18    0.95    3.10   0
 -22  -2   3   58.20    2.40   0
 -22   0   5   15.83    2.07   0
 -20   2   7   10.36    1.50   0
 -20   4  17    4.93    2.91   0
 -20   4  18   14.90    3.36   0
 -19   1   5  102.84    2.55   0
 -19   3   8   34.97    2.28   0
 -18  -6  -1    6.77    2.52   0
 -18   4  19    0.18    3.22   0
 -17   3   7  302.24    3.32   0
 -17   5  13   35.85    2.59   0
 -17   5  14    3.82    2.53   0
 -17   5  15    5.57    2.50   0
 -17   5  16    5.15    2.90   0
 -16  -2   1  146.52    3.09   0
 -16   2   5   11.49    2.02   0
 -15  -9  -3   35.73    4.23   0
 -15   5  11   25.93    2.32   0
 -15   5  18   11.77    3.25   0
 -13   1   3   64.18    2.65   0
 -13   5  19    8.74    3.16   0
 -12   6  14    0.84    2.36   0
 -12   6  15   12.26    2.58   0
 -11 -23  -5    5.97    4.34   0
 -11 -15  -5    4.15    3.42   0
 -11  -5  -2   24.40    3.44   0
 -10 -14  -5    7.02    3.60   0
 -10   6  12   15.08    2.39   0
 -10   6  16   25.63    2.66   0
 -10   6  17    6.63    3.05   0
  -9 -13  -5   35.42    3.62   0
  -9   5   8   43.05    2.27   0
  -8   2   3  144.99    3.10   0
  -8   6  18    5.28    3.18   0
  -7   3   4   10.01    2.29   0
  -6   6  19    0.45    3.58   0
  -5 -21  -6    0.08    3.45   0
  -5 -19  -6   24.65    3.16   0
  -5 -17  -6   15.74    2.87   0
  -4 -22  -6   -0.39    3.53   0
  -4 -16  -6   19.85    3.00   0
  -4   6   9   81.10    2.72   0
  -4   6  19   -0.03    3.52   0
  -3 -23  -6    0.47    3.66   0
  -3 -15  -6    2.15    2.74   0
  -2 -24  -6    1.59    3.60   0
  -2   6  19    3.90    3.56   0
  -1   7  14    3.02    2.75   0
   0   6  19    0.49    3.41   0
   1 -13  -6   78.58    2.82   0
   1  -9  -5  152.71    3.27   0
   1   3   3  576.88    8.52   0
   1   5   6   39.93    2.90   0
   1   7  13    7.35    2.54   0
   1   7  14    2.69    2.70   0
   1   7  15   28.19    3.25   0
   2   6  19    2.44    3.52   0
   3   5   6   30.12    2.44   0
   3   7  13   14.84    2.77   0
   3   7  14    3.35    2.82   0
   4   6  19   -0.74    3.59   0
   5  -1  -1 1993.12   13.02   0
   5   5   6   10.07    2.51   0
   6 -12  -6   13.06    2.09   0
   6  -6  -4  303.54    3.73   0
   7  -1  -1 1538.07   10.06   0
   8 -12  -6  114.06    2.66   0
   8  -6  -4   39.85    1.86   0
  10   0   0   79.90    3.07   0
  10   2   2  155.92    4.58   0
  10   6   9   68.65    4.49   0
  11 -13  -6    2.16    2.03   0
  11  -9  -5  114.74    2.68   0
  12   6  17    1.07    4.68   0
  13 -13  -6   16.00    2.32   0
  13  -9  -5    9.33    1.57   0
  14   6  11  113.57    7.39   0
  14   6  15    7.42    4.47   0
  15  -7  -4   23.18    2.17   0
  15   3   4  110.49    3.67   0
  16 -14  -6   33.69    2.30   0
  16 -10  -5   52.68    2.39   0
  16  -2  -1  148.95    3.15   0
  16   4   6   82.47    4.18   0
  17 -15  -6   17.15    2.61   0
  18 -22  -6    0.56    3.38   0
  18 -16  -6   13.60    2.58   0
  19 -21  -6    3.05    3.09   0
  19 -19  -6    2.79    2.91   0
  19 -17  -6   33.89    2.74   0
  19 -11  -5   26.45    2.22   0
  20 -18  -6    7.14    2.47   0
  20  -6  -3   35.10    2.09   0
  21  -9  -4   69.89    2.45   0
  21  -3  -1   42.89    2.37   0
  23 -13  -5   17.81    1.70   0
  23   3   7  160.36    4.01   0
  24 -14  -5   18.62    2.24   0
  24 -10  -4    7.01    2.04   0
  24  -4  -1    7.28    2.14   0
  25 -21  -5    4.74    3.17   0
  25 -17  -5    4.69    2.63   0
  25 -15  -5    2.99    2.51   0
  25 -11  -4    6.52    2.27   0
  25  -3   0  120.33    2.62   0
  26 -20  -5    4.09    3.28   0
  26 -18  -5    4.24    2.88   0
  26 -16  -5   12.65    2.12   0
  26  -2   1   24.93    1.59   0
  27  -9  -3    0.11    2.07   0
  27  -7  -2   43.23    2.35   0
  27  -5  -1   41.75    1.88   0
  27   3  12    2.68    3.65   0
  28 -10  -3   34.91    2.42   0
  28  -4   0   31.07    1.76   0
  28   2   8    3.33    2.41   0
  29 -15  -4   27.41    2.78   0
  30 -18  -4   -0.72    3.02   0
  30 -16  -4    4.67    2.75   0
  31 -19  -4    2.27    3.08   0
  31  -9  -2   42.67    1.98   0
  31  -7  -1   10.57    1.68   0
  32 -14  -3    3.63    2.61   0
  32 -10  -2   36.79    2.40   0
  32  -8  -1    9.28    2.34   0
  32  -6   0    1.43    1.69   0
  32   0   7    0.71    2.65   0
  33 -15  -3    4.86    2.86   0
  33 -11  -2   28.30    2.58   0
  33  -7   0    4.49    2.25   0
  33  -3   3   22.98    2.52   0
  33  -1   6   18.16    2.90   0
  34 -16  -3    8.37    2.34   0
  34 -12  -2    8.21    2.48   0
  34  -6   1    1.64    2.57   0
  34   0  10    0.50    3.44   0
  35 -13  -2    2.60    2.59   0
  35  -1   8    4.63    3.19   0
  36 -16  -2   -1.02    3.33   0
  36  -6   2    6.80    2.49   0
  36  -4   4    6.23    2.52   0
  37 -13  -1    3.69    3.19   0
  37  -3   6   16.91    2.93   0
  38 -14  -1    6.34    3.21   0
  38  -6   3   20.31    2.65   0
  38  -2  10    3.77    3.50   0
  39 -13   0    1.30    3.11   0
  39  -7   3    3.43    3.04   0
  39  -5   5    9.57    3.07   0
  39  -3   9    2.55    3.64   0
  40  -8   3   -2.47    3.14   0
  41  -9   3    1.31    2.94   0
  41  -5   7    5.76    3.49   0
  42 -10   3    0.87    3.31   0
 -41 -11   7    8.66    3.17   0
 -40 -12   6   -1.06    3.33   0
 -40  -6  11    9.68    3.08   0
 -39  -5  11    5.71    3.17   0
 -38 -14   4    2.57    3.06   0
 -38  -4  11    7.01    2.92   0
 -38  -4  12    3.92    2.39   0
 -37 -15   3    1.61    3.73   0
 -37  -5   9   33.56    2.27   0
 -37  -3  13   -0.22    2.38   0
 -36 -10   4    3.07    2.63   0
 -36  -6   7    5.43    1.91   0
 -36  -4   9   11.19    2.84   0
 -36  -2  13   -0.51    3.12   0
 -36  -2  14    5.51    3.02   0
 -35 -15   2   10.13    3.29   0
 -35 -11   3    1.00    2.89   0
 -35  -9   4    1.98    2.61   0
 -35  -5   7   12.96    2.59   0
 -35  -1  14    8.13    2.94   0
 -35  -1  15    3.12    3.38   0
 -34 -10   3   17.97    2.61   0
 -34  -8   4    3.32    2.60   0
 -34  -4   7   13.01    2.39   0
 -34  -2  10    4.09    2.67   0
 -33 -15   1    2.57    3.45   0
 -33 -11   2   30.70    3.09   0
 -33  -9   3   13.29    2.60   0
 -33  -7   4   15.74    2.35   0
 -33  -1  11    4.14    2.51   0
 -32 -10   2   38.84    2.77   0
 -32  -8   3   24.96    2.53   0
 -32  -4   6    0.86    1.68   0
 -32  -2   8   33.72    2.48   0
 -32   0  12   46.87    2.66   0
 -32   0  13   20.22    2.04   0
 -31  -9   2   40.83    2.77   0
 -31  -7   3    6.98    2.28   0
 -31  -3   6    3.69    2.09   0
 -31  -1   9   20.09    2.29   0
 -31   1  14    2.18    2.63   0
 -31   1  15    3.55    3.18   0
 -31   1  16    3.43    3.32   0
 -30 -14   0    2.58    2.77   0
 -30  -8   2    5.43    2.21   0
 -30   0  10   13.95    1.74   0
 -29  -7   2   10.74    2.08   0
 -29   1  11   22.21    2.44   0
 -28   0   8  181.55    2.83   0
 -28   2  13    5.76    2.47   0
 -28   2  14    7.61    2.67   0
 -28   2  15    5.44    2.07   0
 -28   2  17    4.29    3.38   0
 -27  -3   4   -1.49    2.04   0
 -27  -1   6   12.66    2.17   0
 -27   1   9   17.63    2.32   0
 -26 -12  -1   11.93    2.86   0
 -26   0   7    3.59    1.55   0
 -26   2  10   28.84    2.24   0
 -26   2  11   39.37    1.89   0
 -25 -15  -2   14.54    4.15   0
 -25  -3   3   51.51    2.18   0
 -25  -1   5  105.45    2.53   0
 -25   3  12   15.45    2.27   0
 -25   3  14   10.61    1.91   0
 -25   3  15   13.55    2.14   0
 -25   3  16    4.26    2.12   0
 -25   3  17    5.06    2.98   0
 -25   3  18    1.37    3.63   0
 -24  -4   2   55.75    2.33   0
 -24   2   9   14.63    1.60   0
 -23  -9  -1    6.44    2.66   0
 -23  -5   1    4.47    2.05   0
 -23  -1   4   79.95    2.50   0
 -23   3  10   16.20    2.15   0
 -22   4  13    6.23    2.41   0
 -22   4  14    4.36    2.36   0
 -22   4  15   14.08    2.06   0
 -22   4  17    6.55    3.11   0
 -21   3   9   90.06    2.09   0
 -20  -2   2  108.84    2.68   0
 -20   4  11   11.33    1.63   0
 -19  -3   1  258.90    3.63   0
 -19   5  14    7.06    2.41   0
 -19   5  15    8.78    2.41   0
 -19   5  16    4.55    2.57   0
 -18  -8  -2  101.30    3.90   0
 -18   4   9   16.24    2.23   0
 -17  -1   2   17.76    2.28   0
 -17   1   4   28.60    2.15   0
 -17   5  12    5.37    2.12   0
 -17   5  17    0.59    2.14   0
 -17   5  18    3.42    3.19   0
 -16   4   8   23.82    2.16   0
 -15  -3   0   40.71    2.39   0
 -15   3   6   36.31    1.76   0
 -15   5  10    0.66    2.11   0
 -15   5  19    0.66    3.18   0
 -14   6  14   44.40    2.54   0
 -14   6  15    1.04    2.43   0
 -13  -1   1   53.57    2.53   0
 -13   5   9    4.25    1.94   0
 -12 -20  -5   16.69    3.96   0
 -12  -2   0  182.04    3.69   0
 -12   6  13    6.32    1.81   0
 -12   6  16   10.41    2.05   0
 -12   6  17    4.45    2.99   0
 -11   5   8  135.63    2.80   0
 -10   4   6   33.68    1.83   0
 -10   6  11    4.22    2.05   0
 -10   6  18    7.07    3.22   0
  -9   1   2   29.84    2.04   0
  -8   6  10  108.66    2.61   0
  -8   6  19   -0.55    3.35   0
  -7   5   7  137.87    3.03   0
  -6   4   5   21.59    2.30   0
  -6   6   9   50.81    2.42   0
  -5 -11  -5  295.33    5.15   0
  -5   7  14    6.35    2.32   0
  -5   7  15   20.17    2.89   0
  -4 -20  -6   18.61    3.33   0
  -4 -18  -6   32.64    3.10   0
  -3  -5  -3  401.64    7.45   0
  -3   7  13   20.89    2.43   0
  -3   7  14    6.46    2.43   0
  -3   7  15   25.39    2.73   0
  -3   7  16   21.53    3.02   0
  -2 -22  -6   -0.25    3.39   0
  -2   2   2 1070.79   10.61   0
  -1 -23  -6    4.66    3.51   0
  -1   5   6   91.01    3.05   0
  -1   7  12   26.99    2.31   0
  -1   7  13   49.03    2.64   0
  -1   7  15   15.71    2.79   0
  -1   7  16    3.54    2.80   0
   0 -24  -6    2.10    3.42   0
   0 -14  -6    3.48    2.20   0
   0   6   8   83.98    3.08   0
   1   7  12    6.94    2.29   0
   1   7  16   31.85    3.31   0
   2 -24  -6    5.20    3.67   0
   2   6   8  164.37    3.54   0
   3 -13  -6   14.91    2.41   0
   3  -9  -5   87.16    2.69   0
   3   7  12   18.38    2.81   0
   3   7  15   34.01    2.85   0
   3   7  16    0.57    3.27   0
   4   6   8   85.75    3.30   0
   5  -9  -5  170.43    3.24   0
   5   7  13   12.82    2.84   0
   5   7  14    1.06    2.90   0
   5   7  15   40.54    3.17   0
   7 -13  -6   18.86    2.22   0
   7  -9  -5  146.11    3.03   0
   7   5   6   69.70    4.35   0
   9 -13  -6   43.18    2.29   0
   9  -9  -5    8.43    2.04   0
  10   6  18    8.16    4.51   0
  12 -14  -6   15.09    2.45   0
  13 -23  -6    0.25    3.18   0
  13  -7  -4   37.56    2.33   0
  13  -3  -2    2.38    1.62   0
  14 -14  -6   22.16    1.85   0
  14 -10  -5   39.03    2.18   0
  15 -23  -6    1.08    3.14   0
  16 -22  -6   13.67    3.46   0
  16 -20  -6    9.36    2.66   0
  16 -16  -6   16.16    2.46   0
  16   2   3  236.82    4.34   0
  17 -21  -6   10.26    3.14   0
  17 -19  -6    1.67    2.80   0
  17 -17  -6    3.25    2.51   0
  17 -11  -5    6.33    2.17   0
  17  -1   0   36.24    2.43   0
  18 -20  -6    1.42    2.66   0
  18 -18  -6    3.36    2.37   0
  18  -8  -4  191.08    2.53   0
  18  -6  -3   59.73    2.44   0
  18  -4  -2   41.94    1.88   0
  20 -12  -5   11.05    1.64   0
  20   2   4  222.86    3.88   0
  20   4   8   27.75    3.83   0
  21 -13  -5    7.54    2.28   0
  21  -7  -3  149.03    2.75   0
  21  -5  -2   13.63    2.14   0
  21   3   6   72.57    3.23   0
  22 -14  -5    7.47    2.37   0
  22 -10  -4    3.53    2.10   0
  23 -15  -5   12.51    2.53   0
  24 -20  -5    3.10    3.15   0
  24 -18  -5    0.23    2.91   0
  24 -16  -5   13.08    2.52   0
  24  -8  -3   42.02    1.87   0
  24  -6  -2   79.80    2.57   0
  25 -19  -5    2.66    2.17   0
  25  -1   2   24.20    2.24   0
  25   3   9   22.58    3.32   0
  26 -12  -4   20.67    1.76   0
  26   2   7    5.03    2.76   0
  27 -13  -4    4.32    1.65   0
  28 -16  -4    0.62    2.61   0
  28 -14  -4    5.10    1.81   0
  28  -8  -2   29.50    2.21   0
  28  -2   2    1.77    1.49   0
  29 -19  -4    5.00    3.22   0
  29 -17  -4    3.89    2.96   0
  29 -11  -3   29.16    1.75   0
  29  -9  -2   16.20    2.13   0
  29   1   7    2.23    2.76   0
  30 -12  -3    9.35    1.73   0
  30  -4   1   35.07    1.91   0
  30  -2   3    3.40    2.31   0
  31 -13  -3   11.64    1.82   0
  31   1   9    5.61    2.88   0
  32 -16  -3    5.01    2.92   0
  32  -4   2    6.98    2.53   0
  32  -2   4   11.40    2.45   0
  33 -17  -3    0.67    2.47   0
  33  -9  -1    2.08    1.68   0
  34 -14  -2    0.04    2.65   0
  34 -10  -1   11.46    1.92   0
  34  -8   0   -0.01    2.27   0
  34  -4   3    0.08    2.38   0
  34   0  11   12.54    3.85   0
  34   0  12    0.22    3.86   0
  35 -17  -2    8.21    3.13   0
  35 -15  -2    8.18    2.88   0
  35 -11  -1   16.25    2.00   0
  35  -9   0   10.53    2.63   0
  35  -7   1   27.26    2.05   0
  35  -3   5    2.76    2.70   0
  35  -1   9    4.63    3.23   0
  36 -12  -1    2.46    2.08   0
  36 -10   0    3.65    2.72   0
  36  -8   1    2.94    2.60   0
  37 -15  -1   -0.48    2.98   0
  37 -11   0    1.45    2.93   0
  37  -9   1    3.98    2.76   0
  37  -7   2    0.43    1.98   0
  37  -5   4    0.39    2.75   0
  38 -12   0    1.13    2.72   0
  38 -10   1    5.06    2.96   0
  38  -8   2   14.07    2.56   0
  38  -4   6    6.94    3.04   0
  39 -11   1    1.19    3.08   0
  39  -9   2    0.83    2.85   0
  40 -12   1   -0.94    2.30   0
  40 -10   2    1.99    2.78   0
  40  -6   5    1.38    2.31   0
  41 -11   2    3.25    2.46   0
  41  -7   5    0.57    2.97   0
  42  -8   5    0.87    3.51   0
 -41  -9   8    1.43    3.32   0
 -41  -7  10    1.35    3.02   0
 -40  -8   8   -0.93    2.85   0
 -40  -6  10    3.43    2.95   0
 -39 -11   5    2.76    3.24   0
 -39  -7   8    8.48    2.27   0
 -39  -5  10    2.60    2.97   0
 -38 -12   4    1.84    3.26   0
 -38 -10   5    6.58    3.00   0
 -38  -8   6    2.13    2.62   0
 -37 -11   4    3.69    2.87   0
 -37  -9   5    8.57    2.57   0
 -37  -7   6   19.71    2.60   0
 -37  -5   8    0.65    2.65   0
 -37  -3  11    2.19    2.70   0
 -36 -16   2    3.31    3.83   0
 -36 -12   3    3.46    3.02   0
 -36  -8   5    4.63    2.48   0
 -36  -2  11   11.68    2.65   0
 -36  -2  12    2.95    2.26   0
 -35  -7   5    8.99    2.36   0
 -35  -1  12    8.05    2.66   0
 -35  -1  13   12.25    2.78   0
 -34 -18   1    1.24    3.97   0
 -34 -12   2   11.03    2.82   0
 -34  -6   5    7.05    2.44   0
 -34  -2   9    5.33    2.61   0
 -34   0  14   27.76    2.96   0
 -34   0  15   -0.32    3.32   0
 -33  -5   5    4.68    2.29   0
 -33  -3   7   18.72    2.45   0
 -33  -1  10    3.22    2.42   0
 -32  -6   4   19.57    1.83   0
 -32   0  11    2.99    2.46   0
 -31 -15   0    7.92    3.49   0
 -31 -11   1   17.98    2.62   0
 -31  -5   4   19.67    2.54   0
 -31   1  12    0.90    2.28   0
 -31   1  13    3.13    2.49   0
 -30 -10   1   20.27    2.55   0
 -30  -6   3   50.63    2.44   0
 -30   0   9    3.71    2.36   0
 -30   2  16    4.78    3.13   0
 -29 -19  -1    0.27    4.09   0
 -29 -17  -1    8.94    4.01   0
 -29  -9   1   36.88    2.51   0
 -29  -5   3   55.75    2.60   0
 -29  -1   7   20.33    1.77   0
 -29   1  10   61.66    2.54   0
 -28  -8   1    8.44    2.24   0
 -28  -6   2    5.24    2.05   0
 -28  -2   5   75.98    2.64   0
 -28   2  12    8.64    1.69   0
 -27 -13  -1   34.77    3.26   0
 -27  -7   1   45.98    2.68   0
 -27   3  14    2.07    2.61   0
 -27   3  15    4.47    3.09   0
 -27   3  16    0.60    3.09   0
 -27   3  17    9.37    2.95   0
 -26 -20  -2    2.51    5.95   0
 -26 -18  -2    0.74    4.67   0
 -26  -2   4   17.21    2.07   0
 -25   1   7   28.04    2.30   0
 -25   3  11    1.05    2.29   0
 -24   2   8   46.25    2.26   0
 -24   4  14    9.77    2.42   0
 -24   4  15   -0.47    2.94   0
 -24   4  16   -0.53    2.92   0
 -23   1   6    8.34    2.05   0
 -22 -16  -3   10.39    5.27   0
 -22  -8  -1   25.47    2.36   0
 -22   2   7    9.92    2.19   0
 -22   4  12    7.86    1.72   0
 -22   4  18    7.19    2.57   0
 -21  -1   3  336.89    3.65   0
 -21   3   8   18.14    2.26   0
 -20   2   6  115.89    2.57   0
 -20   4  10    8.11    1.57   0
 -19   5  12    2.89    2.12   0
 -19   5  13   23.07    2.39   0
 -19   5  17    3.18    2.83   0
 -19   5  18   14.67    3.31   0
 -18  -4   0  160.91    3.22   0
 -18   0   3    5.79    2.17   0
 -17 -21  -4    0.99    5.04   0
 -17   5  19   27.22    3.65   0
 -14  -6  -2   71.77    3.38   0
 -14  -4  -1   92.30    3.43   0
 -14   0   2    1.16    1.54   0
 -14   2   4  512.93    4.42   0
 -14   4   7   22.51    1.62   0
 -14   6  12   53.96    2.51   0
 -14   6  13   31.85    2.41   0
 -14   6  16   10.60    2.64   0
 -14   6  17   -1.08    2.93   0
 -12 -18  -5   52.64    4.28   0
 -12   6  11    1.79    2.14   0
 -12   6  18   22.91    2.99   0
 -12   6  19    3.16    3.71   0
 -10   2   3   48.55    2.48   0
 -10   6  10   70.13    2.45   0
 -10   6  19    0.26    3.43   0
  -9   3   4  150.08    3.19   0
  -8   6   9  112.12    2.65   0
  -7   7  13   29.73    2.40   0
  -7   7  14    4.18    2.58   0
  -7   7  15   24.71    2.67   0
  -7   7  16    5.71    2.72   0
  -6  -2  -1  114.69    5.72   0
  -5   7  12   15.74    2.26   0
  -5   7  13   33.78    2.39   0
  -5   7  16   18.82    2.92   0
  -5   7  17   -0.49    3.21   0
  -3 -21  -6    1.91    2.87   0
  -3 -19  -6    4.81    2.95   0
  -3 -17  -6    5.67    2.38   0
  -3   5   6   64.16    2.75   0
  -3   7  12    8.05    2.22   0
  -3   7  17    4.45    3.06   0
  -2   6   8   57.26    2.53   0
  -1 -15  -6   57.78    2.70   0
  -1   3   3 1887.91   12.76   0
  -1   7  11    0.88    2.44   0
  -1   7  17    6.90    2.94   0
   0 -22  -6   12.90    3.26   0
   1 -23  -6    0.95    3.22   0
   1 -15  -6   20.33    2.61   0
   1   7  11    2.00    2.55   0
   1   7  17   20.11    3.07   0
   2 -14  -6    1.14    2.11   0
   3 -23  -6    0.87    2.86   0
   3   7  11   38.08    2.80   0
   3   7  17    2.17    3.48   0
   4 -14  -6    4.02    2.13   0
   5 -23  -6    0.63    3.49   0
   5   7  12   51.30    2.93   0
   5   7  16    6.76    3.38   0
   6 -24  -6    1.03    3.18   0
   6 -14  -6   10.00    2.15   0
   6   6   8   10.50    2.48   0
   7 -23  -6    1.03    3.05   0
   7   7  13   19.57    3.11   0
   7   7  14    2.47    2.95   0
   7   7  15    8.38    3.27   0
   8 -24  -6    4.17    3.23   0
   8 -14  -6   59.45    2.52   0
   9 -23  -6    6.47    3.37   0
  10 -22  -6    4.10    3.35   0
  10 -14  -6   10.50    2.23   0
  11 -23  -6    0.64    3.31   0
  11 -15  -6   54.61    2.64   0
  11  -7  -4   43.26    2.40   0
  11  -3  -2   30.25    1.92   0
  12 -22  -6   10.89    3.16   0
  12 -16  -6   39.99    2.44   0
  13 -21  -6    1.10    3.01   0
  13 -17  -6   13.27    2.33   0
  13 -15  -6    5.28    1.80   0
  13  -5  -3  421.29    3.81   0
  14 -22  -6    3.35    2.44   0
  14 -20  -6    7.88    2.90   0
  14 -18  -6    2.10    2.59   0
  14 -16  -6    9.91    2.25   0
  14  -2  -1   65.61    2.57   0
  14   6  16    8.56    4.87   0
  15 -21  -6   14.44    2.33   0
  15 -19  -6   16.18    2.84   0
  15 -17  -6   38.16    2.46   0
  15 -11  -5   86.87    2.49   0
  16 -18  -6    4.63    1.83   0
  16  -4  -2  700.64    4.95   0
  18 -12  -5    4.94    1.59   0
  18   4   7   59.54    3.75   0
  19  -9  -4   13.22    1.70   0
  19  -3  -1  253.86    3.06   0
  20 -14  -5   48.07    2.66   0
  20  -2   0   15.55    2.24   0
  21 -15  -5   16.10    2.51   0
  22 -22  -5    1.86    3.15   0
  22 -20  -5   -0.27    2.73   0
  22 -18  -5    8.07    2.52   0
  22 -16  -5   24.63    2.62   0
  22  -8  -3   60.43    2.47   0
  22  -4  -1  211.67    3.06   0
  22   2   5   25.86    2.81   0
  23 -21  -5   11.74    2.46   0
  23 -19  -5    0.18    2.64   0
  23 -11  -4    1.17    1.47   0
  23  -3   0   53.00    2.39   0
  24 -12  -4   22.68    2.38   0
  24  -2   1   68.63    2.44   0
  24   2   6   10.66    2.61   0
  25 -13  -4    2.77    2.27   0
  25  -7  -2   13.99    2.28   0
  25  -5  -1   38.33    1.70   0
  26 -14  -4    9.19    2.41   0
  26  -4   0   31.27    2.30   0
  27 -19  -4    1.64    2.84   0
  27 -17  -4    5.22    2.73   0
  27 -15  -4   16.16    2.39   0
  27 -11  -3   25.48    2.38   0
  27  -3   1   94.32    2.08   0
  27  -1   3    5.33    2.22   0
  27   1   6    1.77    2.50   0
  28 -20  -4    8.03    3.00   0
  28 -12  -3    1.77    2.26   0
  28   0   5    2.54    2.44   0
  28   2   9   26.55    3.11   0
  29 -13  -3   19.72    2.45   0
  29  -7  -1    2.62    1.59   0
  29  -3   2   10.50    2.27   0
  30 -14  -3    3.79    2.52   0
  30 -10  -2    3.08    1.69   0
  30  -8  -1    5.13    2.37   0
  30  -6   0   71.74    2.55   0
  30   0   6    2.48    2.43   0
  31 -19  -3   12.75    3.15   0
  31 -17  -3    4.75    3.18   0
  31 -15  -3   -1.35    1.92   0
  31 -11  -2    7.70    2.20   0
  31  -5   1   17.13    1.77   0
  31   1  10    9.78    3.35   0
  32 -18  -3   10.64    2.53   0
  32 -12  -2   10.40    2.29   0
  32   0   8    4.06    2.67   0
  33 -13  -2   -0.88    1.90   0
  33  -5   2    7.58    2.60   0
  33  -3   4   -1.07    2.36   0
  33  -1   7    3.36    2.68   0
  34 -16  -2   -0.50    3.07   0
  35 -13  -1   -1.17    2.78   0
  35  -5   3   14.28    2.44   0
  35  -1  10    7.58    3.43   0
  36 -14  -1    2.07    2.82   0
  36  -6   3    6.09    2.45   0
  36  -4   5    6.01    2.70   0
  36  -2   8    0.55    3.05   0
  37 -13   0    3.94    2.92   0
  38 -14   0    2.29    3.36   0
  38  -6   4    1.44    2.62   0
  38  -4   7    2.12    2.83   0
  39 -13   1    4.84    3.00   0
  39  -7   4   12.52    3.01   0
  39  -5   6    3.03    2.83   0
  40  -8   4    2.60    3.12   0
  40  -6   6    5.24    3.27   0
  41 -11   3   -0.39    3.18   0
  41  -9   4    3.23    3.32   0
  41  -7   6    3.68    3.44   0
 -42  -8   9    0.66    3.54   0
 -41 -11   6    0.28    3.07   0
 -41  -7   9    3.40    3.26   0
 -41  -5  11    0.11    3.02   0
 -40 -12   5    1.01    3.28   0
 -40 -10   6    3.69    3.06   0
 -40  -8   7    2.33    2.80   0
 -40  -6   9    1.45    3.13   0
 -40  -4  12    2.91    3.36   0
 -39 -13   4    5.19    3.49   0
 -39  -9   6    3.62    2.74   0
 -39  -7   7    8.06    2.61   0
 -39  -5   9    3.88    2.81   0
 -39  -3  12    5.96    3.12   0
 -39  -3  13    4.22    3.19   0
 -38  -6   7    5.50    2.54   0
 -38  -2  13    3.69    3.36   0
 -37 -13   3   -1.90    3.09   0
 -37  -3  10    5.85    2.65   0
 -36  -6   6   -1.05    1.78   0
 -36  -2  10    0.16    2.49   0
 -35 -13   2    1.23    2.89   0
 -35  -5   6    0.64    2.50   0
 -35  -3   8   18.49    2.53   0
 -35  -1  11   14.55    2.77   0
 -34 -16   1    8.57    3.73   0
 -34  -4   6    2.96    2.38   0
 -34   0  12   -0.02    2.44   0
 -34   0  13    1.79    2.03   0
 -33 -13   1    7.60    3.23   0
 -33  -1   9   20.93    2.57   0
 -33   1  14    6.88    2.81   0
 -33   1  15    3.80    3.33   0
 -33   1  16    5.31    3.58   0
 -32 -18   0   -0.23    4.04   0
 -32  -4   5   34.46    2.47   0
 -32  -2   7    1.08    2.39   0
 -32   0  10   11.98    2.40   0
 -31   1  11   -0.13    2.40   0
 -30  -4   4   10.75    2.30   0
 -30   0   8   58.16    2.46   0
 -30   2  13    0.48    2.45   0
 -30   2  14    1.66    2.11   0
 -30   2  15    7.61    2.39   0
 -30   2  17    7.32    2.56   0
 -29 -11   0   25.19    2.84   0
 -29   1   9   29.90    2.41   0
 -28 -14  -1   54.77    3.53   0
 -28 -10   0   17.11    2.41   0
 -28  -4   3   25.99    2.19   0
 -28   0   7   15.32    2.12   0
 -27  -9   0    5.02    2.73   0
 -27  -5   2   36.78    2.28   0
 -27   1   8   17.74    1.58   0
 -27   3  12    7.90    2.30   0
 -27   3  13    9.70    1.86   0
 -26  -6   1   59.51    2.53   0
 -26   0   6   91.62    2.13   0
 -26   2   9    7.58    1.61   0
 -25   3  10   12.93    2.31   0
 -24  -2   3   28.29    2.14   0
 -24   0   5   72.98    2.36   0
 -24   4  12  113.06    2.64   0
 -24   4  13   13.32    2.49   0
 -24   4  17    2.29    2.33   0
 -24   4  18   12.22    3.60   0
 -23  -3   2  193.39    2.74   0
 -23   3   9    0.17    1.49   0
 -22  -4   1  203.18    2.90   0
 -22   0   4  235.10    3.10   0
 -21  -5   0  168.76    3.28   0
 -21   1   5   10.14    1.50   0
 -21   5  13   59.46    2.77   0
 -21   5  14   24.58    2.75   0
 -21   5  15    2.87    2.48   0
 -21   5  16   -1.24    2.63   0
 -21   5  17    4.97    3.19   0
 -20   4   9    5.48    2.18   0
 -19   1   4   16.98    2.13   0
 -19   5  11   96.67    2.64   0
 -18   2   5    8.96    2.10   0
 -18   4   8  184.07    2.88   0
 -17  -5  -1  117.39    3.43   0
 -17   3   6    7.83    1.98   0
 -17   5  10   25.49    1.79   0
 -16   4   7   -0.13    1.92   0
 -16   6  13    3.72    2.50   0
 -16   6  15    0.64    1.80   0
 -16   6  17   11.77    3.08   0
 -15   1   3  131.41    2.50   0
 -15   5   9   29.74    1.70   0
 -14   6  11  143.15    2.92   0
 -14   6  18    4.00    2.97   0
 -14   6  19    4.35    3.18   0
 -13   5   8   17.28    2.17   0
 -12   6  10    8.13    2.01   0
 -11 -21  -5   18.83    3.76   0
 -10 -22  -5    2.31    4.10   0
 -10   0   1    4.33    2.34   0
  -9 -23  -5    3.70    4.39   0
  -9   7  13   41.01    2.57   0
  -9   7  14   14.83    2.51   0
  -9   7  15    3.74    2.71   0
  -9   7  16    8.09    2.77   0
  -9   7  17    1.79    3.27   0
  -8 -24  -5   11.06    4.03   0
  -8   4   5  136.67    3.12   0
  -7   7  12   16.51    2.31   0
  -7   7  17   29.32    3.16   0
  -5   5   6    9.67    2.13   0
  -5   7  11    5.63    2.20   0
  -5   7  18    5.60    3.00   0
  -4   6   8   56.36    2.49   0
  -3 -11  -5  102.50    3.45   0
  -3   7  11    0.97    2.05   0
  -3   7  18    1.70    3.28   0
  -2 -18  -6   19.04    2.60   0
  -1 -21  -6    9.81    2.97   0
  -1 -19  -6   25.12    3.30   0
  -1 -17  -6   23.20    2.57   0
  -1   7  18    1.07    3.23   0
   0 -20  -6    6.60    3.01   0
   0 -16  -6   23.15    2.44   0
   0 -10  -5   63.26    2.71   0
   1 -21  -6   24.46    3.00   0
   1  -7  -4  135.94    3.33   0
   1   7  18    0.87    3.82   0
   2 -22  -6    1.67    3.01   0
   2 -16  -6   10.79    2.59   0
   2 -10  -5  106.63    2.93   0
   3 -21  -6    0.38    3.05   0
   3 -15  -6   16.32    2.27   0
   4 -22  -6    2.01    3.07   0
   5 -15  -6    1.37    2.15   0
   5   7  11    4.51    2.72   0
   5   7  17    2.25    3.66   0
   6 -22  -6    4.94    3.14   0
   6 -10  -5   35.03    2.23   0
   7 -21  -6    8.19    3.18   0
   7 -15  -6   15.83    2.21   0
   7  -7  -4   36.89    2.57   0
   7   7  12    2.67    2.86   0
   7   7  16    5.48    3.74   0
   8 -22  -6    0.55    3.13   0
   8 -16  -6   58.64    2.56   0
   8 -10  -5    5.22    2.14   0
   9 -21  -6   14.24    2.95   0
   9 -17  -6    4.80    2.27   0
   9 -15  -6   29.73    2.42   0
   9  -7  -4   47.18    2.01   0
   9   7  14    9.55    3.58   0
  10 -20  -6   15.72    2.76   0
  10 -18  -6    7.04    2.51   0
  10 -16  -6   20.76    2.45   0
  10 -10  -5  108.41    2.28   0
  11 -21  -6    3.92    2.73   0
  11 -19  -6   14.31    2.82   0
  11 -17  -6   11.46    2.41   0
  11  -5  -3  127.89    2.57   0
  12 -20  -6    5.54    2.52   0
  12 -18  -6    6.82    2.55   0
  12   6  18    1.62    4.94   0
  13 -19  -6    7.98    2.53   0
  13 -11  -5   25.66    2.10   0
  14  -8  -4   99.98    2.59   0
  16 -12  -5   48.48    2.40   0
  16  -6  -3   18.68    1.61   0
  17 -13  -5   29.81    2.28   0
  17  -9  -4  140.92    2.74   0
  18 -14  -5   20.70    2.27   0
  19 -15  -5    6.88    2.32   0
  19  -7  -3   39.53    1.68   0
  19  -5  -2   36.42    2.31   0
  20 -22  -5    9.12    3.33   0
  20 -16  -5   11.11    2.53   0
  21 -21  -5    2.89    2.91   0
  21 -19  -5    1.59    2.80   0
  21 -17  -5    3.09    2.58   0
  21 -11  -4    0.77    2.17   0
  22 -12  -4   18.66    2.03   0
  22  -6  -2  124.60    2.21   0
  22   4  10    1.32    3.65   0
  23  -9  -3   12.86    2.25   0
  23   1   4    5.93    2.24   0
  24 -14  -4    6.09    2.17   0
  25 -15  -4    2.76    2.51   0
  25   1   5    7.84    2.19   0
  26 -20  -4    7.60    3.24   0
  26 -18  -4    4.07    3.00   0
  26 -16  -4   13.03    2.54   0
  26  -8  -2   28.09    1.73   0
  27  -9  -2   12.21    2.17   0
  28  -4   1   26.69    2.35   0
  28   2  10   13.83    3.13   0
  29 -15  -3   -1.49    2.54   0
  29   1   8    9.87    2.84   0
  30 -18  -3    3.40    3.27   0
  30 -16  -3   -0.00    2.62   0
  31 -13  -2    0.73    2.27   0
  31  -9  -1    6.67    1.72   0
  31  -7   0   20.70    1.84   0
  31   1  11    4.37    3.42   0
  31   1  12    1.77    4.10   0
  32 -14  -2   -0.15    2.55   0
  32 -10  -1   49.04    2.07   0
  32  -8   0   25.60    2.50   0
  32  -2   5    4.38    2.46   0
  32   0   9   -0.74    3.12   0
  33 -17  -2    3.33    3.22   0
  33 -15  -2    2.87    1.94   0
  33 -11  -1    2.90    1.80   0
  33  -9   0    8.51    2.51   0
  33  -7   1   27.85    2.58   0
  34 -12  -1    2.91    1.89   0
  34 -10   0    8.29    2.64   0
  34  -8   1   12.20    2.53   0
  34  -6   2    5.55    1.93   0
  34  -4   4   16.89    2.60   0
  35 -15  -1    4.11    3.15   0
  35 -11   0   33.56    2.75   0
  35  -9   1    7.14    2.55   0
  35  -7   2   28.86    2.70   0
  35  -3   6    5.85    2.74   0
  35  -1  11    0.63    3.49   0
  36 -16  -1    3.71    2.53   0
  36 -12   0    3.92    2.64   0
  36 -10   1    1.87    2.63   0
  36  -8   2    6.58    2.64   0
  36  -2   9    0.47    3.11   0
  37 -15   0    2.16    3.15   0
  37 -11   1    4.12    2.97   0
  37  -9   2    7.70    2.82   0
  37  -7   3    9.27    1.93   0
  37  -5   5    3.92    2.79   0
  38 -12   1   12.06    2.95   0
  38 -10   2    0.91    2.98   0
  38  -8   3   16.83    2.65   0
  38  -6   5    1.15    2.70   0
  39 -11   2    1.27    3.05   0
  39  -9   3    4.87    2.82   0
  39  -5   7    2.85    3.23   0
  40 -12   2    2.62    2.43   0
  40  -6   7   13.63    3.47   0
  41  -9   5    3.05    3.25   0
 -42 -10   7    4.26    3.45   0
 -42  -6  10    2.37    3.22   0
 -41  -9   7    5.72    3.03   0
 -41  -7   8    2.05    2.89   0
 -40  -6   8    3.78    2.85   0
 -40  -4  11   15.61    3.00   0
 -39  -3  11    4.86    3.13   0
 -38 -14   3    2.44    3.33   0
 -38  -4   9   11.24    2.25   0
 -38  -2  12    2.71    2.90   0
 -37  -5   7    6.27    2.42   0
 -37  -3   9   14.87    2.92   0
 -37  -1  13   12.26    3.35   0
 -37  -1  14    1.39    2.48   0
 -36 -14   2    2.59    3.16   0
 -36  -8   4   12.50    2.53   0
 -36  -4   7    3.08    2.65   0
 -35  -9   3    3.81    2.38   0
 -35  -7   4   19.06    2.50   0
 -35  -1  10    2.44    2.68   0
 -34  -8   3    8.51    2.35   0
 -34  -2   8   33.41    1.98   0
 -34   0  11    0.17    2.41   0
 -33   1  12    5.68    2.44   0
 -33   1  13   21.85    2.64   0
 -32 -16   0    2.17    3.58   0
 -32   2  15   11.01    3.16   0
 -32   2  16   -0.44    3.46   0
 -31  -3   5    0.11    2.30   0
 -30 -12   0    1.71    2.55   0
 -30   2  11    6.66    2.35   0
 -30   2  12   39.37    1.99   0
 -29 -15  -1   25.97    3.77   0
 -29  -3   4    9.60    2.27   0
 -29  -1   6    5.17    1.55   0
 -29   3  14    2.86    2.79   0
 -29   3  15   14.97    2.85   0
 -29   3  16    2.68    2.96   0
 -29   3  17    0.61    3.35   0
 -28   2  10    0.01    1.62   0
 -27  -1   5   29.58    1.81   0
 -26 -16  -2    1.80    4.14   0
 -26  -8   0   15.71    2.32   0
 -26  -4   2   28.45    2.22   0
 -26   2   8    2.33    2.09   0
 -26   4  14    6.28    2.74   0
 -26   4  15    4.22    2.71   0
 -26   4  16   12.34    2.78   0
 -26   4  17    2.71    3.26   0
 -25  -7   0   17.44    2.73   0
 -25  -1   4   27.84    2.13   0
 -24   2   7    4.46    2.07   0
 -24   4  11   12.38    2.25   0
 -23   3   8   49.04    2.39   0
 -23   5  14   15.59    2.51   0
 -23   5  15    2.20    2.80   0
 -23   5  16    2.95    2.88   0
 -23   5  17   11.56    3.09   0
 -21   3   7   66.56    2.29   0
 -21   5  12   19.39    2.44   0
 -21   5  18    3.07    2.49   0
 -19  -1   2  107.04    2.83   0
 -19   5  10    4.70    2.08   0
 -18  -2   1  208.21    3.48   0
 -18   6  13   15.54    2.43   0
 -18   6  14   12.02    2.52   0
 -18   6  15    4.94    2.43   0
 -18   6  16   19.88    3.06   0
 -18   6  17    0.37    3.05   0
 -17 -17  -4   22.30    5.47   0
 -17  -7  -2   74.33    3.39   0
 -17   5   9    1.21    2.14   0
 -16 -22  -4    1.04    5.02   0
 -16   2   4   86.58    2.59   0
 -16   6  18   17.43    2.47   0
 -16   6  19    2.08    3.58   0
 -15  -1   1   26.97    2.28   0
 -14   4   6   35.54    2.17   0
 -11 -19  -5    2.76    3.44   0
 -11 -17  -5    6.42    3.54   0
 -11   1   2   19.03    1.92   0
 -11   3   4  117.37    3.00   0
 -11   7  13    0.77    2.39   0
 -11   7  14   10.93    2.31   0
 -11   7  15   26.72    2.62   0
 -11   7  16   -1.10    2.73   0
 -11   7  17   10.14    3.01   0
 -10   6   9   54.72    1.88   0
  -9  -1   0  125.04    3.80   0
  -9   7  12    1.35    2.22   0
  -9   7  18    4.57    3.26   0
  -7   7  11   60.50    2.46   0
  -7   7  18    1.92    2.95   0
  -6   6   8  595.95    4.73   0
  -5   7  19    2.97    3.82   0
  -3   1   1  326.23    6.51   0
  -3   3   3 1661.67   10.66   0
  -3   7  10   58.68    2.51   0
  -3   7  19   -0.61    4.00   0
  -1  -5  -3  990.00    9.48   0
  -1   7  10   34.09    2.47   0
  -1   7  19   13.87    3.86   0
   0   4   4   62.43    3.38   0
   1 -19  -6   24.35    2.86   0
   1 -17  -6    2.63    2.35   0
   1   7  10   34.31    2.52   0
   2 -20  -6    2.29    2.77   0
   2 -18  -6   -0.08    2.50   0
   2   4   4  472.51    7.28   0
   3 -19  -6    8.92    2.62   0
   3 -17  -6    9.94    2.52   0
   3  -7  -4   30.58    2.39   0
   3   7  10   39.14    2.98   0
   3   7  18    1.49    3.41   0
   4 -18  -6   65.04    2.93   0
   4 -16  -6   56.46    2.58   0
   5 -21  -6   15.17    2.73   0
   5 -19  -6   18.58    2.72   0
   5 -17  -6    4.79    2.57   0
   5  -7  -4  220.81    3.79   0
   5   7  18   -0.75    3.85   0
   6 -20  -6   12.57    2.71   0
   6 -18  -6    9.55    2.64   0
   7 -19  -6   39.32    2.79   0
   7 -17  -6   11.65    2.56   0
   7  -3  -2   34.46    2.75   0
   7   7  11   20.89    3.36   0
   7   7  17    8.91    3.79   0
   8 -20  -6    5.76    2.45   0
   8 -18  -6   24.60    2.75   0
   8   2   2  273.76    6.50   0
   8   6   8   33.04    3.61   0
   9 -19  -6    1.91    2.44   0
   9  -5  -3  241.40    3.21   0
   9   7  13   30.38    3.38   0
   9   7  15   20.14    3.66   0
  11 -11  -5  134.42    2.67   0
  12  -2  -1   18.76    2.41   0
  14 -12  -5    9.58    2.03   0
  14  -6  -3  100.12    2.67   0
  14  -4  -2  241.31    3.48   0
  14   6  17    2.41    5.12   0
  15 -13  -5   27.27    2.35   0
  17 -23  -5    5.49    3.20   0
  17  -7  -3    5.24    2.06   0
  17  -3  -1   43.11    1.89   0
  17   3   5   90.66    3.49   0
  18 -22  -5    5.61    3.26   0
  18 -20  -5    3.89    2.70   0
  18 -16  -5   77.67    2.77   0
  18 -10  -4  139.68    2.85   0
  18  -2   0   13.34    2.34   0
  19 -21  -5    2.99    2.86   0
  19 -19  -5    2.73    2.65   0
  19 -17  -5    6.34    2.67   0
  19   1   3   69.28    2.50   0
  19   5  12    2.46    5.46   0
  20 -18  -5    0.29    1.89   0
  20  -4  -1   24.63    2.31   0
  23 -13  -4   60.96    1.94   0
  23  -7  -2    0.76    2.04   0
  23  -5  -1    2.05    1.47   0
  23   3   8   33.68    3.32   0
  24 -20  -4    3.24    2.88   0
  24 -16  -4   14.78    2.69   0
  24 -10  -3   19.14    1.70   0
  24  -4   0   60.62    2.34   0
  25 -21  -4    2.25    2.58   0
  25 -19  -4    1.18    2.70   0
  25 -17  -4    4.71    2.62   0
  25 -11  -3    7.76    2.23   0
  25  -3   1    2.09    1.99   0
  25   3  10    2.93    3.50   0
  26 -12  -3   43.66    2.44   0
  26   2   8   19.81    2.89   0
  27 -13  -3   17.48    2.27   0
  27  -7  -1   43.31    1.79   0
  28 -16  -3    4.67    2.53   0
  28 -14  -3    3.86    1.79   0
  28 -10  -2   15.01    1.77   0
  28  -6   0    4.87    2.28   0
  28  -2   3   35.88    2.37   0
  29 -19  -3    2.79    3.29   0
  29 -17  -3    5.48    2.63   0
  29 -11  -2   57.36    1.98   0
  29  -5   1   21.59    2.43   0
  30 -12  -2   11.99    1.76   0
  30  -4   2   66.10    2.06   0
  30  -2   4    5.44    2.25   0
  30   0   7   30.89    2.64   0
  31 -15  -2    4.11    2.41   0
  31  -5   2   28.95    2.38   0
  31   1  13    2.17    3.98   0
  32 -18  -2    3.46    3.38   0
  32 -16  -2    2.99    2.61   0
  32 -12  -1   37.83    2.50   0
  32  -4   3   11.00    1.72   0
  33 -13  -1    9.42    2.47   0
  33  -5   3    3.01    2.30   0
  33  -3   5    9.15    2.32   0
  33  -1   8   16.00    2.80   0
  34 -16  -1    5.36    2.85   0
  34 -14  -1    6.78    2.11   0
  35 -17  -1    4.17    2.39   0
  35  -5   4    2.27    2.56   0
  36 -14   0    3.91    3.19   0
  36  -6   4    9.21    2.44   0
  36  -4   6    7.08    2.84   0
  36  -2  10    0.39    3.23   0
  36  -2  11    0.44    3.55   0
  37  -3   9   -2.31    3.28   0
  38 -14   1    3.67    3.45   0
  39 -13   2    7.31    3.00   0
  39  -9   4    9.83    3.00   0
  39  -7   5    1.78    2.20   0
  39  -5   8   10.14    3.49   0
  40 -12   3   14.15    3.68   0
  40 -10   4    2.08    3.35   0
  40  -8   5   -0.51    2.39   0
  40  -6   8    3.04    3.30   0
  41 -11   4   -0.58    3.52   0
 -42  -8   8    0.67    2.55   0
 -40 -10   5    6.40    2.93   0
 -40  -8   6    0.06    2.73   0
 -40  -4  10   -0.58    2.76   0
 -39 -11   4    8.10    2.85   0
 -39  -9   5    3.82    2.95   0
 -39  -7   6    4.41    2.58   0
 -39  -5   8    1.48    2.13   0
 -39  -3  10    0.25    2.93   0
 -38 -10   4   -0.63    2.87   0
 -38  -8   5    5.29    2.73   0
 -38  -6   6    2.62    2.61   0
 -38  -4   8    5.59    2.83   0
 -38  -2  11    1.16    2.16   0
 -37 -15   2    2.22    3.79   0
 -37 -11   3    2.40    2.92   0
 -37  -9   4    2.71    2.46   0
 -37  -7   5    7.58    2.67   0
 -37  -1  11    4.98    2.52   0
 -37  -1  12   11.20    2.40   0
 -36 -10   3    2.75    2.88   0
 -36  -6   5   20.95    2.61   0
 -36  -2   9    3.14    2.02   0
 -36   0  12   27.17    2.69   0
 -36   0  13    2.90    2.83   0
 -35 -17   1    2.79    3.90   0
 -35 -11   2    0.57    2.94   0
 -35  -5   5    8.27    2.34   0
 -35  -3   7    1.11    2.32   0
 -35  -1   9    4.71    2.49   0
 -35   1  15   -0.80    3.41   0
 -34 -14   1    7.83    3.02   0
 -34 -10   2   14.34    2.69   0
 -34  -6   4   16.42    2.36   0
 -34   0  10    4.31    2.57   0
 -33  -9   2    1.67    2.53   0
 -33  -7   3   -0.35    2.20   0
 -33  -5   4    5.28    2.38   0
 -33  -1   8    9.91    1.76   0
 -33   1  11    5.50    2.51   0
 -32  -8   2   29.06    2.66   0
 -32  -6   3   12.08    2.37   0
 -32  -2   6    7.11    2.39   0
 -32   2  13    5.62    2.65   0
 -32   2  14    8.22    2.15   0
 -31 -13   0    0.51    2.70   0
 -31  -7   2   51.32    2.51   0
 -31   1   9   17.22    2.28   0
 -31   3  16    4.17    3.11   0
 -30   0   7   41.89    2.40   0
 -29   1   8    3.71    2.04   0
 -29   3  12    2.00    2.41   0
 -28  -2   4    9.02    2.17   0
 -28   0   6    5.26    2.11   0
 -28   2   9   24.43    2.21   0
 -28   4  15    0.78    2.78   0
 -28   4  16    3.53    2.83   0
 -27  -3   3   12.59    1.52   0
 -27   1   7   10.38    1.57   0
 -26   0   5   31.68    2.34   0
 -26   4  12    1.78    2.47   0
 -25  -5   1   40.76    2.26   0
 -25   1   6   16.44    1.75   0
 -25   3   9   77.87    1.96   0
 -24 -12  -2    8.61    3.32   0
 -24   4  10   24.50    2.21   0
 -23 -11  -2    8.13    2.98   0
 -23  -1   3  303.09    3.48   0
 -23   1   5  173.84    2.79   0
 -23   5  12    2.30    2.19   0
 -23   5  13    3.63    2.25   0
 -23   5  18    4.11    3.09   0
 -22 -10  -2   10.19    3.16   0
 -22   4   9   21.48    2.16   0
 -21  -3   1   42.75    2.25   0
 -21   5  11    5.39    2.17   0
 -20  -6  -1   50.66    2.94   0
 -20   0   3   32.98    2.19   0
 -20   2   5   67.14    2.36   0
 -20   6  14    2.06    2.56   0
 -20   6  15    4.83    2.61   0
 -20   6  16    3.96    2.89   0
 -20   6  17   -1.63    3.09   0
 -19   3   6   49.12    2.22   0
 -18   4   7   93.76    2.53   0
 -18   6  12    9.97    2.39   0
 -18   6  18    3.74    3.02   0
 -17 -19  -4   23.68    5.23   0
 -17  -3   0   52.62    2.64   0
 -17   1   3  255.39    3.45   0
 -16   0   2    8.04    1.61   0
 -16   6  11   20.51    1.83   0
 -15 -23  -4    6.98    4.42   0
 -15   5   8   63.56    1.93   0
 -15   7  15    8.11    2.55   0
 -14  -2   0   41.05    2.37   0
 -14   6  10   84.99    2.05   0
 -13   5   7  203.54    2.96   0
 -13   7  13   31.04    2.55   0
 -13   7  14   15.33    2.39   0
 -13   7  15   21.92    2.13   0
 -13   7  16    3.39    2.51   0
 -13   7  17    3.39    3.08   0
 -13   7  18    6.60    2.94   0
 -12   2   3   29.89    1.73   0
 -12   6   9  162.91    2.85   0
 -11   7  12   41.18    2.53   0
 -11   7  18    0.35    3.28   0
 -10 -20  -5    7.16    3.58   0
 -10 -16  -5   14.13    3.42   0
 -10   4   5   18.90    1.74   0
  -9 -15  -5    6.36    3.28   0
  -9   7  11   34.34    2.35   0
  -9   7  19   12.07    3.60   0
  -8 -14  -5   21.12    3.29   0
  -7 -23  -5    4.53    3.68   0
  -7 -13  -5   35.60    2.93   0
  -7   5   6  100.96    2.44   0
  -7   7  19    2.90    3.27   0
  -6 -24  -5    0.97    3.43   0
  -5   3   3  386.67    5.08   0
  -5   7  10   25.64    2.33   0
  -4  -8  -4   72.74    3.32   0
  -2   4   4 1473.21    9.47   0
  -1 -11  -5  161.23    3.42   0
   1  -5  -3 1127.85    8.83   0
   1  -3  -2   17.79    3.04   0
   1   7  19    2.68    3.69   0
   3  -3  -2  111.21    4.03   0
   4   4   4 1112.20   13.47   0
   5  -5  -3  399.47    4.70   0
   5  -3  -2   61.26    2.60   0
   7 -11  -5   46.07    2.32   0
   7  -5  -3  449.26    4.45   0
   9 -11  -5   40.36    1.74   0
   9   7  12    2.75    3.24   0
   9   7  16    2.02    3.47   0
  12 -24  -5    0.38    3.55   0
  12 -12  -5   82.06    2.41   0
  12  -6  -3   72.88    2.55   0
  13 -23  -5    3.91    3.00   0
  13 -13  -5   20.44    2.32   0
  13  -1   0   26.50    2.27   0
  13   3   4   29.30    2.88   0
  14   2   3   24.16    2.84   0
  15 -23  -5    1.07    3.02   0
  16 -22  -5    1.91    2.89   0
  16 -20  -5    0.44    2.65   0
  16 -16  -5    3.95    2.42   0
  16 -14  -5    1.77    1.66   0
  17 -21  -5    4.96    2.76   0
  17 -19  -5    5.01    2.72   0
  17  -5  -2   33.69    1.82   0
  18 -18  -5   40.22    2.58   0
  18   2   4  123.76    3.17   0
  19 -11  -4   45.47    1.85   0
  20 -12  -4   22.73    2.10   0
  20  -6  -2   16.84    1.56   0
  21 -13  -4   15.44    2.26   0
  21  -9  -3   70.36    1.97   0
  21  -3   0  123.82    2.39   0
  22 -22  -4    1.67    3.42   0
  22 -14  -4   11.60    2.20   0
  22 -10  -3   17.38    2.27   0
  22  -2   1   31.59    1.77   0
  23 -21  -4   22.52    3.01   0
  23 -19  -4   13.04    2.92   0
  23 -17  -4    3.86    2.67   0
  23 -15  -4    9.16    1.77   0
  24 -18  -4   17.09    2.25   0
  24  -8  -2   65.21    1.97   0
  24  -6  -1   82.58    2.49   0
  25  -9  -2   34.58    2.36   0
  25  -5   0   73.15    2.34   0
  26 -14  -3   16.38    2.40   0
  26 -10  -2   50.84    2.30   0
  26  -4   1   33.82    2.20   0
  27 -21  -3    2.16    3.36   0
  27 -19  -3   12.50    2.91   0
  27 -17  -3    9.15    2.59   0
  27 -15  -3    8.15    2.52   0
  27  -3   2   25.15    2.26   0
  27   1   7   -1.06    2.61   0
  28 -20  -3    0.25    2.49   0
  28 -18  -3    1.98    2.14   0
  28 -12  -2    6.13    2.12   0
  28   0   6    0.99    2.25   0
  28   2  11    4.03    3.23   0
  28   2  12    5.86    3.56   0
  29 -13  -2    0.68    2.36   0
  29  -9  -1   40.50    1.79   0
  29  -3   3    9.02    2.25   0
  29   1   9   13.88    3.12   0
  30 -14  -2    8.89    2.30   0
  30 -10  -1   19.09    1.86   0
  30  -8   0   44.18    2.56   0
  30  -6   1   17.63    2.28   0
  31 -19  -2    1.21    3.40   0
  31 -17  -2    5.17    2.82   0
  31 -11  -1   16.42    1.75   0
  31  -9   0   13.19    2.35   0
  31  -7   1   -0.17    2.29   0
  31  -3   4   15.39    2.42   0
  32 -10   0   10.32    2.30   0
  32  -6   2   22.27    2.52   0
  32   0  10    8.47    2.95   0
  32   0  11    1.26    3.49   0
  33 -15  -1   -0.45    2.75   0
  33 -11   0   27.37    2.72   0
  33  -1   9   -0.12    3.00   0
  34 -18  -1    2.35    3.18   0
  34 -12   0    5.91    2.84   0
  34  -6   3   38.30    2.68   0
  34  -4   5    4.55    2.70   0
  34  -2   8    3.85    2.99   0
  35 -15   0    2.43    2.89   0
  35 -13   0    7.45    2.09   0
  35 -11   1   -2.23    2.48   0
  35  -7   3    1.16    2.48   0
  36 -16   0   -2.23    3.01   0
  36 -12   1    6.91    3.11   0
  36  -8   3   13.88    2.60   0
  37 -15   1    4.67    3.15   0
  37 -13   1    0.29    2.21   0
  37 -11   2    7.18    2.91   0
  37  -9   3    1.88    2.75   0
  37  -7   4    7.08    2.20   0
  37  -5   6   22.59    2.81   0
  37  -3  10    1.68    3.55   0
  38 -12   2    1.86    2.85   0
  38 -10   3    4.76    2.95   0
  38  -8   4    0.52    2.20   0
  38  -6   6    1.72    3.02   0
  39 -11   3    2.07    2.84   0
  39  -7   6    1.38    3.23   0
  39  -5   9    1.73    3.45   0
  40  -8   6   -0.27    3.32   0
 -43  -7   9    3.40    3.21   0
 -42 -10   6    8.81    3.53   0
 -42  -8   7   14.95    2.97   0
 -42  -6   9    2.03    2.54   0
 -42  -4  11    4.16    3.29   0
 -41 -11   5    5.84    3.41   0
 -41  -9   6   11.06    2.99   0
 -41  -7   7    1.90    3.06   0
 -41  -5   9   19.09    3.05   0
 -41  -3  12    4.84    2.52   0
 -40 -12   4    3.22    3.24   0
 -40  -6   7    2.38    2.89   0
 -40  -4   9    2.95    3.00   0
 -40  -2  12    0.49    3.43   0
 -39  -5   7    7.73    2.63   0
 -39  -3   9    3.70    2.72   0
 -39  -1  13    9.29    3.48   0
 -38 -12   3    8.26    3.10   0
 -38  -2  10    5.09    2.83   0
 -38   0  14   -0.02    3.15   0
 -37  -5   6   27.18    2.38   0
 -37  -3   8   -1.36    2.09   0
 -37  -1  10    0.31    2.68   0
 -36 -12   2    4.51    2.93   0
 -36  -4   6   17.01    2.55   0
 -36  -2   8    3.07    2.65   0
 -36   0  11    9.15    2.91   0
 -35 -15   1    4.40    3.67   0
 -35   1  12    4.95    2.58   0
 -35   1  13   10.31    2.20   0
 -34  -4   5    2.17    2.42   0
 -34   0   9    8.58    2.33   0
 -34   2  14    4.48    2.92   0
 -34   2  15    4.34    3.41   0
 -33 -17   0    0.55    4.42   0
 -33 -11   1    3.97    3.01   0
 -33   1  10    4.95    2.38   0
 -32 -14   0    5.32    3.36   0
 -32 -10   1   48.19    2.86   0
 -32  -4   4   16.67    2.37   0
 -32   2  11    4.77    2.22   0
 -32   2  12   11.75    1.89   0
 -31  -9   1    9.37    2.47   0
 -31  -5   3    5.26    1.74   0
 -31  -1   6   17.17    2.25   0
 -31   3  13    9.61    2.80   0
 -31   3  14    5.21    2.76   0
 -31   3  15   -0.94    2.46   0
 -30 -18  -1    7.67    4.36   0
 -30  -8   1    6.07    2.34   0
 -30  -6   2   17.50    2.13   0
 -30  -4   3   32.03    2.27   0
 -30   2  10   15.31    1.76   0
 -29  -7   1    1.91    2.17   0
 -29  -5   2   19.97    2.17   0
 -29  -1   5   31.43    2.30   0
 -29   3  11    4.43    2.26   0
 -28 -12  -1   50.31    3.37   0
 -28   2   8  113.18    2.56   0
 -28   4  13    7.00    2.58   0
 -28   4  14    8.60    2.20   0
 -27 -11  -1   30.24    2.99   0
 -26 -10  -1   27.85    3.06   0
 -26   2   7   24.36    2.27   0
 -26   4  11    9.40    2.32   0
 -25 -13  -2    6.77    3.43   0
 -25  -9  -1   13.77    2.81   0
 -25  -3   2   85.52    2.48   0
 -25   3   8   27.49    2.21   0
 -25   5  13   16.43    2.54   0
 -25   5  14    6.51    2.63   0
 -25   5  15    5.31    2.19   0
 -25   5  16   -0.93    2.21   0
 -25   5  17   10.84    3.08   0
 -24  -6   0   85.44    2.80   0
 -24  -4   1    9.06    2.09   0
 -24   0   4   23.25    2.16   0
 -23   3   7  106.85    2.61   0
 -23   5  11  143.63    2.72   0
 -22   6  15    8.98    2.55   0
 -22   6  16    3.19    2.78   0
 -22   6  17    1.84    2.91   0
 -21  -9  -2   26.10    2.86   0
 -21   1   4   99.05    2.62   0
 -20 -12  -3   44.08    4.60   0
 -20  -4   0  154.48    3.18   0
 -20   6  12   55.26    2.45   0
 -20   6  13    0.38    1.83   0
 -20   6  18   17.59    3.27   0
 -19   5   9   12.90    2.11   0
 -17   5   8   66.15    2.37   0
 -16   4   6  313.65    3.40   0
 -16   6  10    5.89    2.11   0
 -15   7  13    6.08    2.45   0
 -15   7  14   10.44    2.31   0
 -15   7  16    0.51    2.16   0
 -15   7  17   28.28    2.95   0
 -15   7  18    0.66    3.07   0
 -14   6   9   26.99    2.13   0
 -13   1   2   26.25    2.44   0
 -13   3   4    7.55    2.23   0
 -13   7  12   20.67    2.39   0
 -13   7  19    2.19    3.57   0
 -11   7  19    0.21    3.26   0
 -10 -18  -5   16.39    3.36   0
 -10 -10  -4   20.83    3.96   0
 -10   6   8  193.16    3.10   0
  -9 -21  -5   19.46    3.48   0
  -9   5   6  110.53    2.95   0
  -9   7  10   33.41    2.29   0
  -8 -22  -5   15.27    3.77   0
  -7   7  10   10.72    1.59   0
  -6   8  15    5.73    2.79   0
  -5   1   1 2026.85   13.40   0
  -4 -24  -5   11.26    3.45   0
  -4 -12  -5   21.61    2.38   0
  -4   4   4  459.18    5.17   0
  -4   6   7   19.41    2.36   0
  -4   8  14   11.38    2.50   0
  -4   8  15   11.39    2.83   0
  -4   8  16   10.34    3.07   0
  -2 -24  -5    6.82    3.56   0
  -2   6   7  156.01    3.34   0
  -2   8  14   51.72    3.24   0
  -2   8  15   23.14    2.77   0
  -2   8  16   17.15    3.11   0
   0   6   7   13.22    2.17   0
   0   8  14   23.71    2.95   0
   0   8  15   21.56    3.29   0
   1 -11  -5   90.00    2.81   0
   2   6   7  109.66    3.24   0
   3 -11  -5  130.96    2.99   0
   3  -5  -3  814.15    6.72   0
   5 -11  -5   75.51    2.10   0
   5   7  10   82.74    3.08   0
   7   7  18    1.14    4.07   0
   8 -24  -5    5.26    3.52   0
   8 -12  -5   35.70    2.37   0
   8  -8  -4  259.77    3.61   0
   9   7  17    3.84    4.16   0
  10 -24  -5    8.22    3.32   0
  10  -2  -1    5.58    1.75   0
  11 -23  -5    0.33    3.26   0
  11 -13  -5  105.59    2.68   0
  12 -22  -5   16.25    2.88   0
  12  -4  -2  115.99    2.55   0
  14 -22  -5   -1.00    2.92   0
  14 -20  -5    3.42    2.60   0
  14 -16  -5    8.77    2.32   0
  14 -14  -5   17.78    1.79   0
  15 -21  -5    1.21    2.70   0
  15 -19  -5    2.30    2.60   0
  15 -17  -5   11.71    2.58   0
  15 -15  -5   56.32    1.97   0
  15  -7  -3   18.18    2.09   0
  15  -3  -1   72.71    2.16   0
  16 -18  -5   12.11    2.39   0
  18 -12  -4   30.61    2.25   0
  18  -6  -2  138.39    2.85   0
  18  -4  -1  271.65    3.56   0
  19 -23  -4   -0.42    3.21   0
  19 -13  -4    9.53    2.06   0
  19  -9  -3   22.66    2.17   0
  19   3   6   15.10    2.66   0
  20 -22  -4    4.74    3.31   0
  20   2   5   67.70    3.08   0
  21 -21  -4    2.54    3.17   0
  21 -15  -4   46.03    2.62   0
  21  -7  -2   11.78    1.51   0
  21  -5  -1  109.11    2.15   0
  21   1   4    5.36    2.17   0
  21   3   7   54.08    3.15   0
  22 -18  -4    3.95    2.86   0
  22 -16  -4   11.58    1.86   0
  22  -4   0   38.96    2.18   0
  22   4  11    6.69    3.84   0
  23 -11  -3   40.24    1.80   0
  24 -12  -3   29.25    1.71   0
  24  -2   2  177.40    2.97   0
  24   2   7   10.37    2.77   0
  25 -21  -3    3.99    3.03   0
  25 -13  -3   16.62    1.75   0
  25  -7  -1   24.29    1.84   0
  25   1   6    4.11    2.47   0
  25   3  11   24.07    3.74   0
  26 -20  -3   22.46    3.12   0
  26 -18  -3    3.57    2.95   0
  26 -16  -3    2.84    2.62   0
  26  -8  -1    3.12    2.12   0
  26  -6   0   24.82    2.23   0
  26   0   5    8.38    2.13   0
  27 -11  -2   49.09    1.87   0
  28  -4   2    4.82    2.28   0
  28   2  13    4.17    4.19   0
  28   2  14    1.93    4.41   0
  29 -15  -2    8.76    2.55   0
  30 -20  -2    5.49    2.72   0
  30 -18  -2    3.09    2.86   0
  30 -16  -2    3.91    1.95   0
  30  -4   3    5.00    2.29   0
  30  -2   5   43.11    2.46   0
  30   0   8    1.71    2.46   0
  31 -13  -1   10.06    2.44   0
  31  -1   7    2.55    2.65   0
  32 -16  -1    6.26    2.68   0
  32 -14  -1    0.70    1.91   0
  32  -8   1   16.57    1.85   0
  32  -4   4   -0.98    2.40   0
  32   0  12    1.37    3.68   0
  32   0  13    0.49    3.85   0
  33 -17  -1    0.79    2.37   0
  33  -9   1   16.71    1.88   0
  33  -7   2    9.31    1.89   0
  33  -3   6   47.45    2.66   0
  33  -1  10    2.43    3.38   0
  34 -14   0    4.14    2.91   0
  34 -10   1    5.15    1.97   0
  34  -8   2    8.61    1.93   0
  35 -17   0   -0.19    3.11   0
  35  -9   2    4.13    2.07   0
  35  -5   5    0.63    2.72   0
  36 -14   1   15.73    3.34   0
  36 -10   2    7.09    2.04   0
  36  -6   5    4.12    2.85   0
  37  -7   5    7.41    2.74   0
  37  -5   7   -0.85    3.04   0
  38 -14   2    0.97    3.41   0
  38  -8   5    6.61    3.05   0
  38  -6   7    2.07    3.19   0
  39 -13   3   -1.36    3.25   0
  39 -11   4    8.26    3.12   0
  39  -9   5    0.01    3.13   0
  39  -7   7    0.70    3.02   0
  40 -12   4    1.57    3.22   0
  40 -10   5    1.35    3.07   0
  40  -8   7    0.05    3.53   0
 -43  -9   7    3.70    3.15   0
 -43  -7   8    3.22    3.51   0
 -43  -5  10    9.78    3.51   0
 -42  -6   8   -0.87    3.20   0
 -41 -13   4    0.51    3.46   0
 -41  -5   8    4.41    3.14   0
 -40  -2  11    6.80    3.25   0
 -39 -13   3    5.76    3.28   0
 -38  -4   7    6.28    2.45   0
 -38  -2   9    6.51    2.88   0
 -38   0  12   15.30    2.91   0
 -38   0  13    9.09    3.02   0
 -37 -13   2    6.13    3.11   0
 -37  -3   7   12.50    2.59   0
 -35  -3   6    0.86    2.34   0
 -35  -1   8   42.03    2.75   0
 -35   1  11    9.67    2.54   0
 -34 -12   1    0.15    2.76   0
 -34   2  13    9.79    2.60   0
 -33  -3   5    3.69    1.63   0
 -33   3  15    6.06    3.32   0
 -31  -3   4   47.08    2.62   0
 -31   1   8   31.26    2.35   0
 -31   3  12   -0.29    2.48   0
 -30 -16  -1    3.85    3.59   0
 -30   2   9   44.10    2.34   0
 -30   4  14    4.30    2.84   0
 -30   4  15   -0.47    3.14   0
 -30   4  16   14.65    3.05   0
 -29 -13  -1   16.45    3.14   0
 -29   1   7   19.32    1.57   0
 -29   3  10   15.26    2.29   0
 -28  -6   1   29.94    2.26   0
 -28  -4   2    0.01    1.90   0
 -28   4  12   28.59    2.39   0
 -27  -1   4   26.31    2.11   0
 -27   1   6   14.04    1.58   0
 -27   3   9   19.24    1.70   0
 -27   5  14   -1.37    2.59   0
 -27   5  17   10.46    3.64   0
 -26 -14  -2   22.19    3.93   0
 -26   4  10  135.59    2.79   0
 -25   1   5  111.66    2.63   0
 -25   5  12    1.16    2.41   0
 -24  -8  -1    7.60    2.38   0
 -24   2   6   44.35    1.83   0
 -24   4   9   20.16    1.61   0
 -23  -5   0   66.12    2.66   0
 -22   0   3   10.89    2.08   0
 -22   2   5   19.19    2.11   0
 -22   4   8   19.98    1.67   0
 -22   6  13    5.11    2.54   0
 -22   6  14    4.75    1.84   0
 -22   6  18    3.03    3.19   0
 -21 -13  -3   11.28    4.29   0
 -21  -1   2   45.46    2.32   0
 -21   3   6   43.88    2.18   0
 -21   5   9   42.09    2.17   0
 -20  -2   1   52.42    2.46   0
 -20   4   7   56.22    2.34   0
 -20   6  11    4.34    2.33   0
 -19 -11  -3   58.06    4.70   0
 -18   0   2  310.13    3.81   0
 -18   6  10   32.90    2.26   0
 -17  -1   1   53.36    2.43   0
 -17   7  13   45.60    2.69   0
 -17   7  14   25.07    2.48   0
 -17   7  15    6.67    2.04   0
 -17   7  16    1.74    2.18   0
 -17   7  17    8.31    2.84   0
 -17   7  18    0.94    3.44   0
 -16  -4  -1   54.96    2.86   0
 -16   6   9   81.35    2.41   0
 -15   5   7   13.73    1.99   0
 -15   7  12   21.20    2.27   0
 -14  -8  -3   89.52    5.54   0
 -14   2   3   89.14    2.79   0
 -13   7  11    2.48    2.16   0
 -12   6   8   95.73    2.50   0
 -11   5   6    3.31    2.16   0
 -11   7  10   27.68    2.30   0
 -10   8  14   23.48    2.49   0
 -10   8  15    4.22    2.67   0
 -10   8  16   24.15    2.75   0
  -9 -19  -5   20.01    3.31   0
  -9 -17  -5    4.85    3.19   0
  -8   8  13   34.29    2.52   0
  -8   8  14    1.87    2.64   0
  -8   8  15    6.26    2.62   0
  -8   8  16   -0.42    2.86   0
  -8   8  17    4.36    3.07   0
  -7 -21  -5    3.03    3.44   0
  -7  -9  -4  117.55    4.49   0
  -7   3   3  106.32    3.10   0
  -6 -22  -5    5.86    3.49   0
  -6   4   4  310.01    4.12   0
  -6   6   7  764.63    5.75   0
  -6   8  13    3.57    2.45   0
  -6   8  14   27.62    2.54   0
  -6   8  16    3.26    2.59   0
  -6   8  17    5.63    3.13   0
  -5 -23  -5    2.50    3.29   0
  -5 -13  -5  104.31    3.55   0
  -5   7   9   69.52    2.62   0
  -4   8  13    9.37    2.49   0
  -4   8  17   -0.12    3.10   0
  -3 -23  -5    0.87    3.43   0
  -3   7   9  165.41    3.30   0
  -2 -12  -5   30.14    2.54   0
  -2  -8  -4   80.65    2.93   0
  -2   8  13    4.23    2.43   0
  -2   8  17   15.26    3.21   0
  -1   7   9   46.38    2.55   0
   0 -24  -5    2.26    3.27   0
   0 -12  -5   40.09    2.90   0
   0   8  13    3.26    2.39   0
   0   8  16    3.24    2.82   0
   0   8  17    5.39    3.31   0
   1   7   9   15.16    2.17   0
   2 -24  -5    4.68    3.49   0
   2 -12  -5   49.20    2.92   0
   2   8  13    0.46    2.77   0
   2   8  14   69.27    3.45   0
   2   8  15    5.55    3.16   0
   2   8  16    3.56    3.43   0
   4 -24  -5    4.54    3.48   0
   4 -12  -5   87.40    2.78   0
   4  -8  -4  336.02    4.13   0
   4   6   7   10.05    2.47   0
   6 -24  -5    1.69    3.10   0
   6 -12  -5   -1.22    2.09   0
   6  -8  -4   89.34    2.77   0
   7 -23  -5    0.28    3.20   0
   9 -23  -5    3.38    3.02   0
   9 -13  -5   34.47    2.24   0
   9   7  11   50.70    4.19   0
  10 -22  -5    0.02    3.11   0
  10 -14  -5    9.78    2.13   0
  10  -6  -3   43.78    1.98   0
  10  -4  -2  884.80    6.03   0
  11 -21  -5    0.87    2.85   0
  11  -9  -4    2.01    1.55   0
  11   7  13    5.76    3.89   0
  11   7  14    0.88    3.74   0
  11   7  15    4.55    3.95   0
  12 -20  -5    2.12    2.74   0
  12 -16  -5   34.07    2.38   0
  12 -14  -5   41.25    1.96   0
  13 -21  -5    4.25    2.13   0
  13 -19  -5    6.84    2.76   0
  13 -17  -5    9.82    2.55   0
  13 -15  -5   11.82    1.85   0
  13  -7  -3  128.70    2.76   0
  14 -18  -5   38.20    2.50   0
  14 -10  -4  175.75    2.54   0
  15 -11  -4  250.05    3.27   0
  15  -5  -2  127.84    2.41   0
  16  -8  -3   60.03    2.42   0
  17 -23  -4    4.16    3.14   0
  17  -1   1    5.49    2.27   0
  18 -22  -4   -0.38    2.91   0
  19 -21  -4    4.17    3.12   0
  19 -15  -4    2.43    2.27   0
  19  -3   0  252.76    3.50   0
  19   5  17    0.04    1.82   0
  20 -20  -4   11.53    2.87   0
  20 -18  -4    2.94    2.73   0
  20 -16  -4    2.55    2.50   0
  20 -10  -3   36.68    2.39   0
  20  -2   1   76.77    2.64   0
  20   4   9    3.85    3.26   0
  21 -19  -4   19.36    2.10   0
  21 -17  -4   88.48    2.44   0
  21  -1   2    8.81    1.55   0
  22  -8  -2   27.74    1.75   0
  22   2   6   11.53    2.29   0
  23  -9  -2    0.00    2.18   0
  23  -3   1   24.73    1.68   0
  23   1   5   85.73    2.79   0
  24 -22  -3    4.36    3.21   0
  24 -20  -3    4.40    2.82   0
  24 -10  -2   22.06    2.23   0
  25 -19  -3   10.89    3.03   0
  25 -17  -3    1.79    2.76   0
  25 -15  -3   12.36    1.83   0
  25 -11  -2    9.56    2.17   0
  25   3  12   17.01    3.83   0
  25   3  15   -0.80    4.69   0
  26 -12  -2   23.92    2.36   0
  26   2   9   23.55    3.02   0
  27 -13  -2   57.49    2.50   0
  27  -9  -1   54.54    1.82   0
  27  -7   0   46.96    2.37   0
  27  -5   1   53.89    1.91   0
  28 -20  -2    1.70    3.47   0
  28 -18  -2    4.55    2.84   0
  28 -16  -2    1.81    2.50   0
  28 -14  -2    2.58    1.79   0
  28 -10  -1    1.66    1.53   0
  28  -8   0   10.05    2.08   0
  28  -6   1   19.98    2.28   0
  28  -2   4   58.39    2.59   0
  29 -19  -2    6.18    2.52   0
  29 -17  -2    5.36    2.22   0
  29 -11  -1   15.76    1.75   0
  29  -5   2   46.59    2.63   0
  29   1  10   16.90    3.19   0
  31 -19  -1    1.09    3.09   0
  31 -17  -1    2.38    2.78   0
  31 -15  -1   12.41    2.65   0
  31 -11   0   16.28    2.41   0
  31  -5   3   53.04    2.64   0
  32 -18  -1   10.83    2.45   0
  32 -12   0    0.75    2.52   0
  33 -15   0   15.11    2.74   0
  33 -13   0   24.59    2.07   0
  33  -5   4   13.40    2.35   0
  33  -1  11    0.99    3.38   0
  34 -16   0    9.65    2.37   0
  34 -12   1    2.66    2.81   0
  34  -6   4    5.76    2.53   0
  34  -4   6    2.20    2.78   0
  34  -2   9    7.02    3.01   0
  35 -13   1   -0.76    2.67   0
  35  -7   4    7.02    2.53   0
  36 -16   1    4.05    3.13   0
  36 -12   2    3.61    3.11   0
  36  -8   4    1.53    2.75   0
  36  -4   8    1.50    2.99   0
  37 -15   2    2.46    3.10   0
  37 -13   2    9.27    2.35   0
  37 -11   3    1.05    3.01   0
  37  -9   4   18.22    2.96   0
  37  -5   8   -1.73    2.89   0
  38 -12   3    3.60    2.35   0
  38 -10   4    1.95    2.90   0
  38  -6   8    2.36    3.00   0
  39  -7   8    2.45    3.25   0
 -43  -5   9    4.15    3.09   0
 -42  -8   6    4.40    2.92   0
 -41  -9   5    5.78    3.11   0
 -41  -7   6    4.36    2.75   0
 -41  -3  10    5.45    2.30   0
 -40 -14   3    5.87    3.68   0
 -40 -10   4    4.54    2.83   0
 -40  -8   5   11.88    3.08   0
 -40  -6   6    0.63    2.63   0
 -40  -4   8    9.49    2.05   0
 -40  -2  10    0.53    3.10   0
 -39  -9   4    7.22    2.86   0
 -39  -7   5    4.92    2.80   0
 -39  -3   8    1.75    2.75   0
 -39  -1  11    0.02    2.26   0
 -38 -14   2   -0.85    3.55   0
 -38 -10   3   16.35    2.71   0
 -38  -8   4    0.84    2.43   0
 -38  -6   5    4.85    2.76   0
 -38   0  11   -1.19    2.85   0
 -37  -9   3    3.33    2.73   0
 -37  -7   4    0.82    2.49   0
 -37  -5   5    3.86    2.50   0
 -37  -1   9    5.27    2.55   0
 -37   1  12    7.90    2.79   0
 -36 -16   1    3.82    3.76   0
 -36  -8   3   21.07    2.71   0
 -36  -6   4   20.50    2.70   0
 -35 -13   1    1.61    2.86   0
 -35  -9   2   23.03    2.88   0
 -35  -7   3    2.81    2.59   0
 -35  -5   4   34.05    2.53   0
 -35   1  10    5.04    2.33   0
 -34  -8   2    8.02    2.35   0
 -34  -6   3    4.84    2.37   0
 -34  -2   6   16.57    1.88   0
 -34   0   8   13.21    2.48   0
 -34   2  11    1.64    2.40   0
 -34   2  12    2.42    1.99   0
 -33 -15   0   14.57    3.67   0
 -33   1   9   22.78    1.92   0
 -33   3  13   -0.37    2.86   0
 -33   3  14   -0.35    2.30   0
 -32  -2   5   10.73    1.67   0
 -32   0   7    1.64    1.65   0
 -32   2  10    0.92    1.68   0
 -32   4  16    2.09    3.06   0
 -31 -11   0   14.34    2.67   0
 -31   3  11    4.12    2.29   0
 -30 -10   0    8.85    2.55   0
 -30   0   6   12.54    1.61   0
 -30   4  12    9.07    2.36   0
 -30   4  13    1.30    2.59   0
 -29  -9   0    9.05    2.35   0
 -29  -3   3   22.00    1.64   0
 -29   5  16    4.51    2.88   0
 -28  -8   0   11.04    2.35   0
 -28   0   5   24.70    1.77   0
 -28   2   7    3.55    1.96   0
 -28   4  11    1.19    1.79   0
 -27 -19  -2    5.66    6.61   0
 -27 -17  -2   21.30    4.89   0
 -27  -5   1   44.32    2.37   0
 -27   3   8   20.19    2.27   0
 -27   5  13    7.85    2.74   0
 -26   4   9   16.90    2.25   0
 -25  -1   3  293.31    3.27   0
 -25   3   7    1.11    2.15   0
 -25   5  11    0.38    2.23   0
 -24  -2   2  257.45    2.96   0
 -24   4   8   28.99    2.16   0
 -24   6  13   20.02    2.48   0
 -24   6  14   13.38    2.86   0
 -24   6  15    5.88    2.08   0
 -24   6  16    4.58    2.23   0
 -24   6  17    0.25    3.14   0
 -23  -7  -1   23.84    2.81   0
 -23  -3   1   32.38    2.25   0
 -23   1   4   70.74    2.38   0
 -23   5  10   18.45    1.73   0
 -22   6  12    0.36    2.27   0
 -20  -8  -2   34.10    3.13   0
 -19  -5  -1  170.94    3.42   0
 -19  -3   0  246.66    3.64   0
 -19   1   3   37.11    1.76   0
 -19   3   5  219.28    3.08   0
 -19   7  13    5.65    2.38   0
 -19   7  14    2.14    2.50   0
 -19   7  15   13.27    2.11   0
 -19   7  16    3.77    2.13   0
 -19   7  17   12.11    2.94   0
 -19   7  18    2.71    3.42   0
 -16 -20  -4   19.18    4.52   0
 -16  -6  -2  186.05    4.31   0
 -15   3   4   66.27    2.46   0
 -15   7  11   85.26    2.67   0
 -14   4   5    5.09    2.14   0
 -14   6   8  376.36    3.56   0
 -13  -5  -2   13.44    2.67   0
 -13  -3  -1  967.94    8.07   0
 -13   7  10   10.64    2.15   0
 -12   8  14    4.01    2.54   0
 -12   8  15    1.97    2.77   0
 -12   8  16    0.24    2.72   0
 -12   8  17   10.50    3.15   0
 -11  -1   0    8.22    1.52   0
 -10   8  13   20.41    2.60   0
 -10   8  17   -1.52    2.79   0
 -10   8  18    4.07    3.36   0
  -9   7   9  148.17    2.85   0
  -8 -18  -5   19.98    3.13   0
  -8   2   2  292.49    4.21   0
  -8   4   4  161.30    3.24   0
  -8   6   7  324.48    3.96   0
  -8   8  12   12.96    2.27   0
  -8   8  18   10.58    3.40   0
  -7 -15  -5    7.84    3.03   0
  -7   7   9   29.06    1.75   0
  -6 -14  -5   25.13    2.78   0
  -6   8  12   13.13    2.27   0
  -6   8  18    0.47    3.33   0
  -4 -22  -5    3.47    3.41   0
  -4   8  12   19.75    2.28   0
  -4   8  18   23.01    3.38   0
  -3 -13  -5    6.88    2.63   0
  -3   5   5   81.29    2.71   0
  -2 -22  -5    2.62    3.36   0
  -2   8  12   12.80    2.38   0
  -2   8  18    0.00    3.34   0
  -1 -23  -5    0.47    3.15   0
  -1   5   5   92.87    3.04   0
   0   8  12   28.73    2.52   0
   0   8  18    1.95    3.64   0
   1 -23  -5    7.09    3.27   0
   1   5   5  689.06    7.30   0
   2  -8  -4   33.05    2.55   0
   2   8  17    9.63    3.61   0
   3 -23  -5    1.79    3.25   0
   3   7   9   82.22    2.96   0
   4   8  14   16.90    3.07   0
   4   8  15    3.59    3.07   0
   4   8  16    3.99    3.52   0
   5 -13  -5   33.03    2.34   0
   6 -22  -5   -0.49    2.96   0
   7 -13  -5   47.22    2.41   0
   7   7  10   15.88    2.92   0
   8 -22  -5    5.22    3.09   0
   8 -14  -5   10.86    2.21   0
   8  -6  -3  187.38    3.38   0
   9 -21  -5   10.92    2.87   0
   9 -15  -5   43.15    2.35   0
   9  -9  -4  191.25    3.24   0
   9   7  18    2.75    4.64   0
  10 -20  -5   20.45    2.87   0
  10 -18  -5    5.84    2.34   0
  11 -19  -5    9.52    2.75   0
  11 -17  -5   55.45    2.70   0
  11 -15  -5   84.55    2.21   0
  11  -1   0    8.26    1.70   0
  11   7  16    6.58    4.05   0
  12 -18  -5    9.46    2.36   0
  12 -10  -4    7.39    2.08   0
  13  -5  -2    6.67    2.23   0
  13  -3  -1  977.78    6.16   0
  14 -24  -4   -0.50    3.41   0
  14   4   6   34.55    3.59   0
  15 -23  -4    2.69    2.97   0
  16 -22  -4    2.15    2.79   0
  16 -12  -4    1.71    1.66   0
  16  -6  -2  185.94    3.01   0
  16  -4  -1   17.09    2.28   0
  17 -21  -4   -0.84    2.77   0
  17   1   3  311.86    4.29   0
  18 -16  -4   28.34    2.47   0
  18 -14  -4   26.50    1.72   0
  19 -19  -4    3.45    2.44   0
  19  -7  -2   10.34    1.51   0
  20  -8  -2    7.71    1.95   0
  22 -22  -3    1.92    3.41   0
  22   4  12   21.85    4.24   0
  23 -21  -3    4.82    3.13   0
  23 -19  -3   -0.15    2.73   0
  23 -15  -3    3.96    2.30   0
  23  -7  -1   12.09    2.16   0
  23  -5   0   63.41    2.29   0
  23  -1   3   16.36    2.18   0
  23   3   9    3.73    3.01   0
  24 -18  -3   33.06    2.82   0
  24 -16  -3   19.03    1.96   0
  24  -8  -1   29.51    2.29   0
  24  -4   1   88.37    2.46   0
  25  -3   2   21.13    2.06   0
  25   3  13    5.97    3.67   0
  25   3  14    9.66    4.53   0
  26 -14  -2   14.71    2.31   0
  27 -21  -2   -1.13    3.09   0
  27 -19  -2   12.18    3.17   0
  27 -17  -2    7.39    2.74   0
  27 -15  -2   11.71    2.43   0
  27  -3   3   14.77    2.17   0
  27   1   8    3.67    2.34   0
  28 -12  -1   -0.05    2.13   0
  28   0   7   -0.32    2.29   0
  29 -13  -1   19.87    2.55   0
  29  -9   0    5.65    1.73   0
  29  -3   4    7.52    2.36   0
  29   1  11   11.97    3.60   0
  30 -18  -1    3.63    2.88   0
  30 -16  -1    3.54    2.66   0
  30 -14  -1   28.43    1.91   0
  30 -10   0    6.85    1.77   0
  30  -8   1   13.87    2.38   0
  30  -6   2    4.48    1.66   0
  30   0   9    1.80    2.76   0
  31  -9   1    7.36    2.35   0
  31  -7   2   20.79    2.46   0
  31  -3   5   15.49    1.85   0
  31  -1   8    2.64    2.65   0
  32 -14   0    6.74    2.58   0
  32 -10   1    2.27    2.45   0
  32  -8   2   11.45    2.50   0
  32  -6   3    8.36    1.90   0
  32  -4   5    2.24    2.39   0
  33 -17   0   -1.68    2.96   0
  33 -11   1    5.05    1.99   0
  33  -9   2   16.09    2.56   0
  33  -7   3    5.68    2.56   0
  33  -1  12    7.30    3.90   0
  34 -14   1   -0.71    2.69   0
  34 -10   2    3.13    2.70   0
  34  -8   3   46.76    2.78   0
  34  -2  10    3.18    3.10   0
  34  -2  11    3.68    3.70   0
  35 -17   1    1.50    3.51   0
  35 -15   1    0.99    2.30   0
  35 -11   2    2.64    2.20   0
  35  -9   3    2.68    2.41   0
  35  -5   6    7.93    2.55   0
  35  -3   9    5.58    2.79   0
  35  -3  10    1.51    3.38   0
  36 -14   2    3.93    3.32   0
  36 -10   3   15.25    2.18   0
  36  -6   6   10.55    2.81   0
  37 -13   3    4.18    2.91   0
  37  -7   6   16.34    3.09   0
  37  -5   9    3.58    3.55   0
  38 -14   3   11.57    3.09   0
  38 -12   4    6.69    3.05   0
  38 -10   5    9.53    2.97   0
  38  -8   6    1.35    2.91   0
  38  -6   9   11.88    3.80   0
  39 -11   5    1.44    3.38   0
  39  -9   6    1.48    2.53   0
 -44  -8   7    4.36    3.49   0
 -43  -9   6    5.10    3.08   0
 -43  -7   7    1.99    3.24   0
 -42 -10   5    3.94    3.04   0
 -42  -6   7    0.63    3.05   0
 -42  -4   9    4.59    2.39   0
 -42  -2  11    3.55    3.35   0
 -41 -11   4    3.99    3.32   0
 -41  -5   7    7.73    3.01   0
 -41  -1  12    3.78    3.09   0
 -40  -4   7    0.80    2.59   0
 -40  -2   9    3.34    2.67   0
 -39 -11   3    7.10    3.04   0
 -39  -5   6    0.14    2.10   0
 -39  -1  10   18.51    2.25   0
 -38  -4   6    3.26    2.56   0
 -38  -2   8   32.27    2.20   0
 -38   0  10    0.02    2.61   0
 -37 -11   2   15.16    3.21   0
 -37  -3   6   13.62    2.43   0
 -37  -1   8    0.91    2.67   0
 -37   1  11    3.08    2.90   0
 -36 -14   1   -0.52    3.54   0
 -36 -10   2    3.95    2.72   0
 -36  -4   5   20.27    2.43   0
 -36   0   9   12.44    1.96   0
 -36   2  12    1.95    2.56   0
 -35  -3   5    2.97    2.54   0
 -35  -1   7   26.81    2.41   0
 -35   3  15    3.60    3.47   0
 -34  -4   4   33.70    2.45   0
 -33  -7   2   18.73    2.38   0
 -33  -5   3   12.94    2.23   0
 -33  -1   6   12.18    1.78   0
 -33   1   8   12.35    2.41   0
 -33   3  12    9.93    2.48   0
 -32 -12   0    0.82    2.67   0
 -32  -6   2   48.08    2.61   0
 -32  -4   3    9.04    2.26   0
 -32   2   9   20.42    2.29   0
 -32   4  13    1.67    2.62   0
 -32   4  15    3.59    2.54   0
 -31  -1   5    7.60    2.12   0
 -31   3  10   12.32    2.43   0
 -30 -14  -1    1.96    3.32   0
 -30   2   8   19.56    1.77   0
 -30   4  11    2.91    2.22   0
 -29  -1   4   32.85    2.34   0
 -29   1   6    7.43    2.13   0
 -29   5  13    3.71    2.63   0
 -29   5  14   -2.01    2.98   0
 -29   5  15    7.20    2.38   0
 -28  -2   3   45.95    2.39   0
 -28   4  10    2.20    2.15   0
 -27  -7   0   45.53    2.47   0
 -27  -3   2   17.01    2.15   0
 -27   1   5   34.34    2.29   0
 -27   5  12    0.42    1.80   0
 -26  -4   1  146.44    2.88   0
 -26   2   6   59.32    1.94   0
 -26   6  14    3.25    2.69   0
 -26   6  15   -2.32    2.91   0
 -26   6  16    8.97    3.14   0
 -26   6  17    1.48    3.54   0
 -25   5  10    7.83    2.25   0
 -24   2   5   16.73    2.14   0
 -24   6  12   45.06    2.58   0
 -23   3   6   37.01    2.27   0
 -22 -14  -3   14.64    4.99   0
 -22  -4   0   36.77    2.27   0
 -22   4   7   35.38    1.80   0
 -22   6  11    0.96    1.58   0
 -21   5   8    3.66    2.21   0
 -21   7  14   20.30    2.67   0
 -21   7  15   38.17    2.70   0
 -21   7  16    5.85    2.31   0
 -21   7  17    2.27    2.88   0
 -21   7  18   -2.74    3.54   0
 -20   2   4   38.35    1.68   0
 -19   7  12   10.16    2.52   0
 -18 -10  -3   88.21    4.75   0
 -18   6   9   33.19    2.28   0
 -17   7  11   39.68    2.47   0
 -16  -2   0  693.98    5.75   0
 -16   2   3  106.46    2.81   0
 -16   6   8   23.80    2.02   0
 -16   8  15    5.48    2.54   0
 -16   8  16    6.28    2.76   0
 -15 -21  -4    6.28    4.12   0
 -15   1   2   18.17    1.70   0
 -15   7  10    0.86    2.23   0
 -14 -22  -4    3.75    4.01   0
 -14   0   1   21.48    2.26   0
 -14   8  13   29.79    2.37   0
 -14   8  14   35.68    2.71   0
 -14   8  15   12.48    2.57   0
 -14   8  16   33.69    2.80   0
 -14   8  17    3.39    3.12   0
 -14   8  18    2.67    3.38   0
 -13 -23  -4    1.42    4.10   0
 -12   8  13   19.91    2.28   0
 -12   8  18   16.96    3.20   0
 -11   7   9  159.57    2.84   0
 -10   8  12   62.09    2.63   0
 -10   8  19    3.39    3.64   0
  -8  -2  -1  112.03    4.36   0
  -8   8  19    3.44    3.56   0
  -7 -19  -5    0.93    2.90   0
  -7 -17  -5    2.07    2.77   0
  -7   1   1 1556.92   10.25   0
  -6 -20  -5    0.51    3.05   0
  -6   8  11   10.53    2.19   0
  -6   8  19    1.24    3.37   0
  -5 -21  -5    6.67    2.88   0
  -5   5   5   14.92    1.72   0
  -4 -14  -5    5.29    2.59   0
  -4   8  11   11.52    2.11   0
  -4   8  19    0.47    3.71   0
  -3 -21  -5   23.59    3.23   0
  -2   8  11   17.42    2.22   0
  -2   8  19    3.41    3.66   0
  -1 -13  -5   35.12    2.48   0
   0 -22  -5   -0.36    3.02   0
   0   8  11   13.69    2.70   0
   1 -13  -5   34.73    2.42   0
   2 -22  -5   17.18    3.05   0
   2   8  12   24.36    2.58   0
   2   8  18    0.42    3.89   0
   3 -13  -5   10.54    2.23   0
   4 -22  -5   11.34    2.81   0
   4 -14  -5   96.22    3.05   0
   4   8  13    6.90    2.79   0
   4   8  17    2.93    3.81   0
   5 -21  -5    0.88    2.82   0
   5   1   1   83.01    5.33   0
   5   7   9  110.85    3.97   0
   6 -20  -5    1.02    2.44   0
   6 -14  -5    8.44    2.16   0
   6  -6  -3   26.09    2.41   0
   7 -21  -5    2.44    2.69   0
   7 -19  -5   47.32    2.73   0
   7 -15  -5   42.32    2.50   0
   7  -9  -4   64.36    2.68   0
   8 -20  -5   23.83    2.84   0
   8 -18  -5    1.47    2.43   0
   8 -16  -5    3.68    2.32   0
   8  -4  -2  350.15    4.37   0
   9 -19  -5   12.94    2.45   0
   9 -17  -5   12.35    2.42   0
  10 -10  -4  133.47    2.76   0
  11   7  12   18.18    4.22   0
  11   7  17    5.32    4.82   0
  12 -24  -4    1.15    3.41   0
  13 -23  -4    3.26    2.98   0
  13 -11  -4  120.67    2.27   0
  14 -12  -4   69.55    2.49   0
  14  -8  -3    3.50    1.99   0
  14  -2   0   38.93    2.43   0
  15 -13  -4   46.27    2.41   0
  16 -20  -4    1.48    2.58   0
  16 -14  -4   12.82    2.26   0
  17 -19  -4    3.86    2.65   0
  17 -17  -4   38.82    2.70   0
  17 -15  -4   35.21    2.36   0
  18 -18  -4    7.74    1.93   0
  18 -10  -3  202.21    2.75   0
  19 -11  -3    8.23    2.21   0
  19   5  13    7.54    5.70   0
  20 -22  -3    4.58    2.95   0
  20 -12  -3    3.89    2.12   0
  20  -6  -1   39.74    2.32   0
  21 -21  -3    1.91    3.09   0
  21 -13  -3    9.21    2.04   0
  21  -3   1  139.03    2.90   0
  22 -20  -3    4.96    2.90   0
  22 -18  -3    0.54    2.87   0
  22 -16  -3   -1.29    2.50   0
  22 -14  -3   14.50    1.73   0
  22 -10  -2    1.80    2.17   0
  22   4  15    0.66    5.34   0
  23 -17  -3    2.86    1.97   0
  23 -11  -2   12.56    2.22   0
  24 -12  -2   13.50    2.32   0
  24   2   8   14.65    2.88   0
  25 -21  -2    1.03    3.12   0
  25 -13  -2   16.98    2.24   0
  25  -9  -1   23.29    1.69   0
  25  -7   0   19.45    2.24   0
  25  -5   1   65.31    2.46   0
  26 -20  -2   -1.12    2.91   0
  26 -18  -2    7.21    2.96   0
  26 -16  -2    0.85    2.53   0
  26 -10  -1   36.99    2.19   0
  26  -4   2   22.18    2.16   0
  26   0   6    1.40    2.10   0
  26   2  10    5.99    3.02   0
  27 -11  -1    4.26    1.58   0
  29 -19  -1    4.15    3.17   0
  29 -17  -1    4.33    2.84   0
  29 -15  -1    7.66    2.32   0
  29   1  12    3.70    3.42   0
  29   1  13    1.60    3.98   0
  29   1  14   -0.46    4.19   0
  30 -12   0    2.77    2.25   0
  30  -4   4   17.56    2.36   0
  30   0  10    4.87    3.38   0
  31 -13   0    2.33    1.70   0
  31  -1   9    5.36    2.99   0
  32 -18   0    0.67    3.02   0
  32 -16   0    2.88    2.02   0
  32  -2   8    8.58    2.76   0
  33 -13   1    3.44    2.83   0
  33  -5   5    4.13    2.69   0
  34 -16   1    5.61    2.97   0
  34 -12   2    3.19    2.63   0
  34  -6   5    8.35    2.75   0
  34  -4   7    3.72    2.82   0
  34  -2  12    0.94    3.53   0
  35 -13   2    5.30    2.81   0
  35  -7   5   -0.67    2.79   0
  35  -5   7   -1.92    2.72   0
  35  -3  11    3.94    3.59   0
  36 -16   2   -1.15    2.60   0
  36 -12   3    3.08    2.95   0
  36 -10   4   -0.37    2.54   0
  36  -8   5   12.83    2.95   0
  36  -6   7    4.41    2.86   0
  36  -4  10    0.08    3.36   0
  37 -15   3   -0.87    3.41   0
  37 -11   4    1.47    2.97   0
  37  -9   5    6.93    2.86   0
  37  -7   7    1.88    2.89   0
  38  -8   7    1.86    3.31   0
  39 -11   6    3.26    3.17   0
  39  -9   7    1.44    3.14   0
 -44  -6   8    3.67    3.24   0
 -43  -5   8    3.31    3.29   0
 -43  -3  10    2.93    3.48   0
 -42 -12   4    1.77    3.49   0
 -42  -4   8    4.62    3.22   0
 -42  -2  10    5.53    2.97   0
 -41  -3   8    2.50    2.69   0
 -41  -1  11    1.03    3.16   0
 -40 -12   3    2.69    3.28   0
 -40   0  11   10.42    3.08   0
 -40   0  12    1.15    2.55   0
 -39  -3   7    5.98    2.49   0
 -39  -1   9   14.04    3.03   0
 -39   1  12    1.31    3.01   0
 -39   1  13    2.30    2.58   0
 -38 -12   2    4.74    3.04   0
 -38  -2   7   16.10    2.56   0
 -37   1  10    2.35    2.59   0
 -36  -2   6   69.53    2.90   0
 -36   0   8   16.42    2.65   0
 -36   2  11    7.30    2.68   0
 -35 -11   1   15.57    3.07   0
 -35   1   9    5.61    1.86   0
 -35   3  13    0.95    2.84   0
 -34 -16   0    6.76    3.83   0
 -34 -10   1    8.89    2.79   0
 -34  -2   5   17.79    2.55   0
 -34   0   7   36.70    2.46   0
 -34   2  10    3.41    1.86   0
 -34   4  15    4.47    3.49   0
 -33 -13   0   22.31    3.08   0
 -33  -9   1    5.01    2.54   0
 -33  -3   4    1.13    1.75   0
 -33   3  11   17.02    1.95   0
 -32  -8   1    8.55    2.45   0
 -32   0   6   59.93    2.43   0
 -32   4  12    4.52    2.52   0
 -31 -19  -1    0.62    5.06   0
 -31 -17  -1    0.37    4.10   0
 -31  -7   1   10.94    2.38   0
 -31  -5   2   46.55    2.42   0
 -31  -3   3   54.40    2.61   0
 -31   3   9    8.05    2.17   0
 -31   5  14    7.43    2.87   0
 -31   5  15    0.17    3.27   0
 -31   5  16   -2.08    3.30   0
 -30  -6   1   65.35    2.82   0
 -30  -4   2    1.56    2.09   0
 -30   0   5    0.14    2.18   0
 -30   2   7   32.86    2.17   0
 -29   3   8    3.20    2.21   0
 -29   5  12   23.57    2.72   0
 -28   4   9    8.11    2.23   0
 -28   6  15    2.78    2.70   0
 -28   6  16    3.38    3.22   0
 -27 -15  -2   31.61    4.26   0
 -27  -1   3   58.76    2.28   0
 -27   3   7    5.28    2.10   0
 -27   5  11   65.60    2.06   0
 -26  -6   0   27.10    2.40   0
 -26  -2   2   30.53    2.06   0
 -26   4   8   15.40    2.23   0
 -26   6  13   10.47    2.57   0
 -25   1   4   27.51    2.05   0
 -24   0   3  167.25    2.90   0
 -24   6  11    6.80    2.31   0
 -23  -1   2    1.37    2.00   0
 -23   7  14    4.09    2.69   0
 -23   7  15    1.40    2.76   0
 -23   7  16    2.66    2.91   0
 -22  -6  -1  171.53    3.53   0
 -22  -2   1  177.28    3.15   0
 -22   6  10   32.00    2.36   0
 -21 -21  -3    1.75    5.92   0
 -21   1   3  320.20    3.55   0
 -21   3   5   85.08    2.36   0
 -21   7  13   27.19    2.04   0
 -20   0   2  113.72    2.67   0
 -20   6   9    1.99    2.18   0
 -19  -7  -2  173.83    4.15   0
 -19  -1   1  116.85    2.93   0
 -19   5   7    7.56    2.13   0
 -19   7  11   56.78    2.55   0
 -18   8  15   14.10    2.73   0
 -18   8  17    2.73    2.95   0
 -17   3   4    5.69    2.02   0
 -17   7  10   40.64    2.43   0
 -16   4   5   55.33    1.94   0
 -16   8  13    6.53    2.52   0
 -16   8  14   35.50    2.57   0
 -16   8  17    2.04    2.89   0
 -16   8  18    2.18    3.44   0
 -15   5   6   45.33    2.20   0
 -14   8  12   21.08    2.47   0
 -11   3   3  341.32    4.01   0
 -10 -24  -4    8.29    3.96   0
 -10   2   2   47.77    2.06   0
 -10   8  11   16.57    2.42   0
  -9   1   1   80.58    3.22   0
  -6 -18  -5    3.55    2.92   0
  -6 -16  -5    2.03    2.41   0
  -5 -19  -5    3.07    2.96   0
  -5 -17  -5    1.65    2.71   0
  -5  -9  -4   39.05    2.90   0
  -5   7   8  186.30    3.40   0
  -4 -20  -5    3.28    2.75   0
  -3 -19  -5   22.51    3.22   0
  -3 -15  -5   20.44    2.72   0
  -3   7   8  108.38    3.01   0
  -2 -20  -5   25.07    2.91   0
  -2 -14  -5    9.80    2.33   0
  -1   7   8   19.88    2.29   0
   0 -20  -5    8.09    2.82   0
   1 -21  -5    1.86    2.74   0
   2 -20  -5    6.35    2.71   0
   2 -14  -5   68.08    2.68   0
   2   8  11   56.45    3.11   0
   3 -15  -5    3.98    2.09   0
   3   5   5  105.84    4.09   0
   4 -20  -5   47.71    2.79   0
   4 -18  -5   10.88    2.77   0
   4 -16  -5    6.30    2.12   0
   4   8  12   19.83    3.16   0
   4   8  18    2.25    3.96   0
   5 -19  -5    3.50    2.51   0
   5 -17  -5    8.50    2.44   0
   5 -15  -5    2.52    2.18   0
   5  -9  -4  165.72    3.38   0
   6 -18  -5    4.25    2.50   0
   6 -16  -5    1.84    2.25   0
   6  -2  -1   54.02    3.48   0
   6   2   2  651.91   13.17   0
   6   6   7   10.79    2.82   0
   6   8  14   58.81    3.75   0
   6   8  15    8.98    3.19   0
   6   8  16    4.43    3.59   0
   7 -17  -5   48.85    2.58   0
  10 -24  -4    4.22    3.50   0
  11 -23  -4    1.47    3.24   0
  11 -11  -4   65.91    2.42   0
  11  -5  -2  189.69    3.47   0
  11  -3  -1   88.08    2.77   0
  12 -22  -4    5.30    2.75   0
  12 -12  -4   17.05    2.07   0
  12  -8  -3   31.96    2.17   0
  12   2   3   51.79    3.27   0
  13 -13  -4   25.63    2.18   0
  14 -22  -4    1.58    2.29   0
  14 -14  -4   36.30    2.29   0
  15 -21  -4    3.64    2.16   0
  15 -17  -4   12.81    2.43   0
  15 -15  -4   21.17    2.44   0
  15  -9  -3   78.26    1.98   0
  15  -1   1    9.09    2.08   0
  15   3   5  183.48    4.41   0
  16 -18  -4    9.88    2.53   0
  16 -16  -4   14.23    2.26   0
  16 -10  -3   94.55    2.53   0
  16   4   7   28.60    3.55   0
  17  -7  -2    5.90    1.52   0
  17  -5  -1  136.85    2.90   0
  17   5  10   15.25    4.48   0
  18  -8  -2   30.84    2.06   0
  18  -2   1  114.90    2.95   0
  19 -23  -3    2.98    2.52   0
  19   1   4  122.56    3.10   0
  20 -20  -3    0.74    2.67   0
  21 -19  -3   18.01    2.93   0
  21 -17  -3   39.88    2.66   0
  21  -7  -1  117.39    2.60   0
  21  -5   0  174.37    2.95   0
  21   3   8   15.30    2.81   0
  22   4  13    1.54    4.25   0
  22   4  14   11.13    5.03   0
  24 -22  -2    0.93    2.49   0
  24 -20  -2    5.78    2.91   0
  24 -14  -2    1.19    2.32   0
  24  -2   3   36.70    2.33   0
  24   0   5    1.00    2.15   0
  25 -19  -2   12.51    2.85   0
  25 -17  -2   -0.40    2.70   0
  25 -15  -2    0.27    1.67   0
  25   1   7   39.05    2.55   0
  26 -12  -1   28.43    2.30   0
  26  -8   0   14.06    1.62   0
  26  -2   4   23.64    2.23   0
  27 -21  -1    0.90    3.41   0
  27 -13  -1    0.25    2.22   0
  27  -9   0    6.03    1.99   0
  27  -7   1   29.00    2.27   0
  27  -5   2   27.08    2.23   0
  27   1   9   -0.87    2.79   0
  28 -20  -1    2.39    3.11   0
  28 -18  -1    8.50    3.15   0
  28 -16  -1    5.74    2.50   0
  28 -14  -1    2.49    1.82   0
  28 -10   0   14.03    1.82   0
  28  -8   1    7.05    2.11   0
  28  -6   2   76.34    2.55   0
  28  -2   5   10.26    2.22   0
  29 -11   0   24.50    1.81   0
  29  -9   1   13.34    2.15   0
  29  -5   3   13.20    2.43   0
  29  -1   7    4.43    2.43   0
  30 -14   0    2.36    2.52   0
  30 -10   1    0.75    2.25   0
  30  -6   3   52.59    2.44   0
  30   0  11   15.68    3.42   0
  31 -19   0    1.21    2.57   0
  31 -17   0    3.80    2.77   0
  31 -15   0    5.71    1.99   0
  31 -11   1   -1.81    2.37   0
  31  -5   4    6.33    1.79   0
  31  -3   6    4.25    2.42   0
  32 -14   1    6.60    2.61   0
  32 -12   1   17.94    1.91   0
  32 -10   2    1.32    2.40   0
  32  -6   4    0.06    2.49   0
  32  -4   6    3.39    2.48   0
  33 -17   1   -0.88    3.28   0
  33 -15   1    9.69    2.15   0
  33 -11   2   11.46    2.76   0
  33  -9   3    1.59    2.50   0
  34 -14   2    3.31    2.70   0
  34 -10   3   31.49    2.96   0
  34  -8   4    7.00    2.66   0
  34  -4   8    9.70    2.69   0
  35 -15   2   10.16    2.49   0
  35 -11   3    5.42    2.13   0
  35  -9   4   19.99    2.55   0
  36 -14   3    6.12    3.22   0
  36  -4  11    1.20    3.59   0
  37 -13   4    7.23    3.25   0
  37  -9   6    7.83    2.81   0
  38 -12   5    6.86    3.46   0
  38 -10   6    0.25    3.29   0
  38  -8   8    0.45    3.12   0
 -44  -8   6    2.49    3.13   0
 -44  -4   9    3.68    3.58   0
 -43  -9   5   -0.00    3.09   0
 -43  -7   6   -0.17    3.27   0
 -43  -3   9    2.71    3.35   0
 -42  -8   5    0.93    3.06   0
 -42  -6   6   -1.40    3.10   0
 -41 -13   3   -0.18    3.43   0
 -41  -9   4    8.81    3.20   0
 -41  -7   5    1.00    3.02   0
 -41  -5   6    2.96    2.92   0
 -41  -1  10    3.86    3.16   0
 -40  -8   4    1.16    2.95   0
 -40  -6   5   14.59    2.92   0
 -40  -2   8    6.18    2.90   0
 -39 -13   2    9.89    3.80   0
 -39  -9   3    0.71    2.68   0
 -39  -7   4   21.17    2.64   0
 -39  -5   5    2.65    2.75   0
 -39   1  11    3.87    3.19   0
 -38  -8   3   12.79    2.77   0
 -38  -6   4    3.77    2.75   0
 -38  -4   5    2.85    2.33   0
 -38   0   9    3.67    2.61   0
 -38   2  12   -0.37    2.87   0
 -38   2  13    6.73    2.56   0
 -37 -15   1    1.40    3.82   0
 -37  -7   3    0.12    2.63   0
 -37  -5   4    0.16    2.64   0
 -37   3  14    1.48    3.47   0
 -36 -12   1    4.34    3.43   0
 -36  -6   3    6.14    2.71   0
 -36   2  10    3.51    2.46   0
 -35  -1   6    1.24    2.52   0
 -35   3  12    2.05    2.02   0
 -34 -14   0    3.77    3.55   0
 -34   2   9    2.02    2.35   0
 -34   4  13   10.04    3.08   0
 -34   4  14    6.66    2.45   0
 -33  -1   5   12.80    2.40   0
 -33   1   7   43.61    2.51   0
 -32  -2   4   36.20    1.96   0
 -32   2   8   33.98    1.88   0
 -32   4  11    4.10    2.53   0
 -31 -15  -1    8.44    3.51   0
 -31   5  13   18.28    2.93   0
 -30  -2   3    3.67    2.12   0
 -30   4  10   49.68    2.07   0
 -29 -11  -1    0.32    3.07   0
 -29  -5   1   28.51    2.28   0
 -29   5  11    8.83    2.46   0
 -28 -10  -1    9.47    2.42   0
 -28   0   4   62.09    2.39   0
 -28   2   6   15.68    1.64   0
 -28   6  13    2.28    2.72   0
 -28   6  14    4.04    2.78   0
 -27  -9  -1   35.93    3.01   0
 -26  -8  -1    6.79    2.67   0
 -26   2   5    9.12    2.19   0
 -26   6  12   10.36    1.90   0
 -25 -11  -2   12.82    3.28   0
 -25  -5   0   76.88    2.69   0
 -25  -3   1   10.15    2.13   0
 -25   5   9   43.15    1.75   0
 -25   7  14    7.40    2.63   0
 -25   7  15    6.82    2.92   0
 -25   7  16    2.34    3.37   0
 -25   7  17    7.65    3.42   0
 -24 -10  -2    4.17    3.23   0
 -24   4   7    0.56    1.56   0
 -24   6  10   11.67    2.12   0
 -23   5   8   32.39    2.19   0
 -23   7  13    0.61    2.52   0
 -22   2   4  149.93    2.39   0
 -22   4   6   13.01    2.27   0
 -21   5   7   18.31    2.20   0
 -21   7  11   17.45    2.46   0
 -20 -22  -3    0.49    5.46   0
 -20   8  15    6.51    3.00   0
 -20   8  16    5.66    3.07   0
 -20   8  17    2.41    3.29   0
 -19   7  10   17.49    2.10   0
 -18  -4  -1    2.93    2.08   0
 -18   2   3   90.35    2.72   0
 -18   4   5   28.60    2.21   0
 -18   6   8   30.04    1.82   0
 -18   8  13   -0.92    2.51   0
 -18   8  14    7.90    2.37   0
 -18   8  18    3.60    3.18   0
 -17   1   2   16.43    1.68   0
 -16 -18  -4   36.01    4.54   0
 -16 -16  -4   11.64    4.35   0
 -16   0   1   -0.34    2.08   0
 -16   8  12   20.56    2.54   0
 -15   7   9   10.96    2.20   0
 -14   6   7    0.12    1.47   0
 -14   8  11   20.77    2.42   0
 -13  -1   0   26.49    1.75   0
 -13   3   3  421.86    4.23   0
 -12   2   2  102.02    2.75   0
 -12   4   4   31.27    2.36   0
 -12   8  11   13.33    2.33   0
 -11 -23  -4    2.44    3.87   0
 -11 -11  -4   26.05    3.97   0
 -11   7   8   42.32    2.30   0
  -9   7   8  166.68    3.01   0
  -9   9  15    1.25    2.45   0
  -9   9  16   14.26    2.74   0
  -8 -24  -4    3.82    3.65   0
  -8   6   6   18.70    2.19   0
  -8   8  10  126.25    2.86   0
  -7   9  14    0.52    2.78   0
  -7   9  15   12.36    2.74   0
  -7   9  16    1.60    2.85   0
  -7   9  17   17.99    3.43   0
  -6   6   6   67.11    2.74   0
  -6   8  10    1.17    2.19   0
  -5   9  14   18.49    2.94   0
  -5   9  15    8.25    2.83   0
  -5   9  16   13.99    2.94   0
  -4 -18  -5   22.54    2.57   0
  -4 -16  -5   72.61    2.95   0
  -4   0   0  710.86   10.43   0
  -4   6   6  818.36    6.09   0
  -4   8  10   66.82    2.68   0
  -3 -17  -5   14.74    2.48   0
  -3  -9  -4   46.04    2.93   0
  -3   9  15    3.69    3.05   0
  -2 -18  -5   22.00    2.69   0
  -2 -16  -5    4.09    2.27   0
  -2   8  10   21.67    2.35   0
  -1 -19  -5   42.10    2.87   0
  -1 -17  -5   22.39    2.47   0
  -1 -15  -5   31.67    2.40   0
   0 -18  -5   10.30    2.55   0
   0 -16  -5    0.68    2.27   0
   1 -25  -4    2.49    3.58   0
   1 -19  -5   27.67    2.80   0
   1 -15  -5   43.14    2.42   0
   1  -9  -4   63.40    2.74   0
   1   7   8   31.74    2.41   0
   2 -18  -5   11.68    2.55   0
   2 -16  -5   48.55    2.52   0
   3 -25  -4    3.10    3.57   0
   3 -17  -5   12.75    2.40   0
   6 -24  -4    4.89    3.06   0
   6 -10  -4   43.95    2.40   0
   6  -4  -2  796.43    6.39   0
   6   8  13   22.87    3.21   0
   6   8  17    2.05    3.81   0
   8 -24  -4    1.02    3.07   0
   9 -23  -4    2.09    3.10   0
   9 -11  -4   17.45    2.13   0
   9  -7  -3   99.07    2.32   0
   9  -1   0  130.44    3.27   0
  10 -22  -4    3.26    2.84   0
  13 -21  -4    1.66    2.63   0
  13 -19  -4    1.96    2.30   0
  13 -15  -4   14.40    2.26   0
  13  -9  -3  219.33    3.07   0
  14 -20  -4    0.68    2.08   0
  14 -18  -4   33.57    2.60   0
  14 -16  -4   58.61    2.57   0
  14  -4  -1   97.73    2.38   0
  17 -23  -3    2.48    3.00   0
  17 -11  -3  130.69    2.39   0
  18 -22  -3   -0.74    2.93   0
  18 -12  -3  144.48    2.38   0
  18   2   5   44.20    2.83   0
  19 -21  -3    7.99    2.31   0
  19 -19  -3    3.26    2.54   0
  19 -15  -3    3.65    2.17   0
  19 -13  -3   -0.34    1.55   0
  19   5  14    6.35    5.76   0
  20 -18  -3    3.44    2.40   0
  20 -16  -3   33.90    2.30   0
  20 -10  -2   39.93    2.35   0
  21 -11  -2  155.43    2.89   0
  21   1   5    4.00    2.24   0
  22 -22  -2    1.03    3.33   0
  22 -12  -2   -0.07    2.07   0
  22  -8  -1   17.71    1.73   0
  22  -6   0  160.66    2.84   0
  22  -4   1   60.79    2.31   0
  22   2   7   28.09    2.83   0
  23 -21  -2    2.99    2.84   0
  23 -19  -2    3.19    2.73   0
  23 -13  -2   15.53    1.64   0
  23  -9  -1    4.88    2.13   0
  23  -3   2   48.28    2.22   0
  23   1   6   37.63    2.53   0
  23   3  10   10.41    3.06   0
  24 -18  -2   37.63    2.79   0
  24 -16  -2   20.48    2.39   0
  24 -10  -1   22.90    2.21   0
  25 -11  -1    4.11    1.60   0
  25  -3   3   70.99    2.48   0
  26   2  11    6.86    3.13   0
  27 -17  -1   20.80    2.96   0
  27 -15  -1    0.11    2.26   0
  27  -3   4   -0.40    2.20   0
  28 -12   0   -1.18    2.14   0
  29 -13   0   64.07    2.48   0
  29  -7   2   24.41    1.82   0
  30 -18   0    2.99    2.25   0
  30 -16   0    1.98    2.00   0
  30  -8   2   18.80    1.80   0
  30  -4   5   10.85    2.29   0
  30   0  12    5.70    3.52   0
  30   0  13    1.76    3.81   0
  30   0  14   -1.48    4.32   0
  31 -13   1    7.60    2.49   0
  31  -9   2   30.22    1.92   0
  31  -7   3    5.34    1.80   0
  31  -1  10    9.93    2.89   0
  32 -18   1    1.21    3.32   0
  32 -16   1    4.23    2.97   0
  32  -8   3    7.80    1.90   0
  32  -2   9   17.59    2.63   0
  33 -13   2    2.42    2.93   0
  33  -5   6   13.59    2.70   0
  34 -16   2    0.52    3.08   0
  34 -12   3   -0.32    2.60   0
  34  -6   6    2.27    2.74   0
  35 -15   3    3.79    3.15   0
  35 -13   3    6.16    2.91   0
  35 -11   4    2.37    2.61   0
  35  -7   6    6.69    2.87   0
  35  -5   8   29.55    2.90   0
  36 -12   4    2.68    2.72   0
  36 -10   5    7.06    3.10   0
  36  -8   6    1.42    2.66   0
  36  -6   8    2.59    2.84   0
  37 -11   5   13.16    2.47   0
  37  -7   8    2.21    3.02   0
  38 -10   7    2.04    3.57   0
 -45  -5   8    2.67    3.24   0
 -44  -6   7    5.14    3.12   0
 -43 -11   4    5.70    3.29   0
 -43  -5   7    3.80    2.95   0
 -42 -10   4   -0.80    3.08   0
 -42  -4   7    5.48    3.16   0
 -42  -2   9    1.79    2.98   0
 -41 -11   3    2.36    3.52   0
 -41  -3   7   13.94    3.01   0
 -41  -1   9   -1.19    3.07   0
 -41   1  12    7.01    3.19   0
 -40 -14   2    0.95    4.04   0
 -40 -10   3   14.76    3.15   0
 -40  -4   6    3.99    2.13   0
 -40   0  10   12.99    2.27   0
 -39  -3   6    6.03    2.63   0
 -39  -1   8    9.13    2.12   0
 -39   1  10   16.28    2.82   0
 -38 -10   2    3.93    3.21   0
 -38   0   8   18.10    2.67   0
 -38   2  11    0.42    3.01   0
 -37 -13   1    4.01    3.33   0
 -37  -9   2   13.37    2.79   0
 -37  -3   5   21.00    2.65   0
 -37   1   9    3.46    2.58   0
 -37   3  12   13.83    2.84   0
 -37   3  13    0.05    2.43   0
 -36  -8   2    8.24    2.56   0
 -36  -4   4    3.24    1.81   0
 -36   0   7    4.90    2.54   0
 -36   4  14   -1.54    3.42   0
 -35 -17   0    1.54    4.62   0
 -35  -7   2    2.85    2.58   0
 -35  -5   3   15.66    2.29   0
 -35  -3   4    1.85    2.45   0
 -35   3  11   10.22    2.00   0
 -34  -6   2    7.06    2.44   0
 -34  -4   3    7.22    2.37   0
 -34   0   6  168.61    3.07   0
 -34   4  12    5.39    2.45   0
 -33 -11   0   28.75    3.32   0
 -33   3   9    4.62    2.32   0
 -33   5  14   -1.37    3.28   0
 -33   5  15    3.53    2.58   0
 -32 -10   0    9.29    2.65   0
 -32   0   5    4.05    2.06   0
 -32   2   7   -0.25    2.13   0
 -32   4  10   14.53    2.49   0
 -31  -9   0   12.32    2.47   0
 -31  -1   4   11.25    2.23   0
 -31   3   8    4.25    2.33   0
 -30 -12  -1    2.53    2.96   0
 -30  -8   0   42.87    2.66   0
 -30   4   9   15.91    2.27   0
 -30   6  14    6.97    3.08   0
 -30   6  15    2.36    2.75   0
 -30   6  16    5.58    2.43   0
 -29  -7   0   58.42    3.00   0
 -29  -3   2   61.85    2.40   0
 -29   1   5   34.23    1.78   0
 -29   3   7   20.68    2.22   0
 -29   5  10    6.75    2.16   0
 -28   4   8   39.90    2.43   0
 -28   6  12   14.62    2.74   0
 -27   5   9    6.87    2.30   0
 -27   7  15    1.41    2.70   0
 -27   7  16    1.44    3.33   0
 -26 -12  -2    8.17    3.03   0
 -26   4   7   66.50    2.38   0
 -26   6  11    0.64    1.71   0
 -25  -7  -1  117.97    3.53   0
 -25  -1   2   37.99    2.34   0
 -25   5   8    8.79    2.04   0
 -25   7  13    6.96    2.84   0
 -24  -4   0   57.21    2.82   0
 -23  -9  -2   21.55    2.90   0
 -23   1   3  300.99    3.42   0
 -23   3   5  124.16    2.21   0
 -23   7  12   -0.25    1.77   0
 -22   6   9    8.10    1.59   0
 -22   8  15    1.59    2.89   0
 -22   8  16   14.93    3.16   0
 -22   8  17    1.50    3.45   0
 -21  -5  -1    5.74    2.17   0
 -21  -3   0  125.10    2.80   0
 -20   6   8    2.27    2.11   0
 -20   8  13    4.16    2.51   0
 -20   8  14    1.16    1.93   0
 -20   8  18   -0.03    2.54   0
 -19   3   4   29.27    1.73   0
 -18  -2   0   13.55    2.10   0
 -18   8  12    3.78    2.56   0
 -17  -9  -3   66.79    4.69   0
 -16   6   7   18.22    2.16   0
 -16   8  11   36.05    2.51   0
 -15 -19  -4    0.91    4.03   0
 -15  -3  -1   11.04    2.19   0
 -14   4   4  364.70    3.82   0
 -13 -21  -4    4.10    3.76   0
 -13   5   5   15.98    2.29   0
 -13   7   8   31.30    2.16   0
 -13   9  14    7.34    2.60   0
 -13   9  15   17.45    2.86   0
 -13   9  16    0.64    3.01   0
 -13   9  17    4.47    3.23   0
 -12 -22  -4    5.96    4.02   0
 -12   8  10   -0.26    2.19   0
 -11   1   1  529.40    5.31   0
 -11   9  14   11.18    2.64   0
 -11   9  15    1.75    2.56   0
 -11   9  16    0.92    2.69   0
 -11   9  18    2.63    3.42   0
 -10  -2  -1   49.20    2.99   0
 -10   6   6   62.88    2.51   0
  -9 -23  -4   18.11    3.84   0
  -9   9  13   28.05    2.64   0
  -9   9  14    2.67    2.38   0
  -9   9  17    2.62    2.94   0
  -9   9  18    7.18    3.39   0
  -7   9  13    2.41    2.64   0
  -7   9  18    1.48    3.45   0
  -6 -24  -4    0.63    3.92   0
  -6   0   0   34.80    3.30   0
  -5   9  13   90.75    3.04   0
  -5   9  17   -1.70    3.15   0
  -5   9  18    3.89    3.39   0
  -4 -24  -4    0.02    3.53   0
  -3   9  13    1.90    2.71   0
  -3   9  14   13.02    2.59   0
  -3   9  16    0.62    2.85   0
  -3   9  17    5.21    3.18   0
  -1   9  14    4.65    2.90   0
  -1   9  15    1.57    2.73   0
  -1   9  16   22.25    3.59   0
   0 -24  -4    3.58    3.65   0
   0   6   6    3.51    2.03   0
   0   8  10    8.14    2.19   0
   2 -24  -4   -1.93    3.36   0
   2  -6  -3  282.20    4.53   0
   3   7   8    2.61    2.39   0
   4 -24  -4    5.38    3.46   0
   4   8  11    7.20    2.85   0
   6   8  12   23.78    3.05   0
   6   8  18    8.11    4.64   0
   7 -23  -4    6.18    3.23   0
   7 -11  -4   10.77    2.10   0
   7  -7  -3   27.33    2.37   0
   8 -22  -4    5.60    2.73   0
   8   8  15    0.58    3.77   0
   9  -5  -2   -0.01    2.21   0
   9   7  10    0.89    3.61   0
  10 -12  -4  163.56    2.46   0
  10  -8  -3  153.76    3.10   0
  10   6   8   80.10    6.68   0
  11 -21  -4    7.35    2.15   0
  11 -13  -4   10.17    1.97   0
  11   1   2   71.18    3.07   0
  11   3   4   66.20    4.00   0
  11   7  18    0.12    5.11   0
  12 -20  -4    4.05    2.05   0
  12 -18  -4    2.83    2.47   0
  12 -16  -4   29.04    2.58   0
  12 -14  -4   16.02    2.19   0
  12  -6  -2   59.46    2.51   0
  12  -2   0  190.08    3.56   0
  13 -17  -4    7.19    2.36   0
  14 -24  -3    1.94    3.21   0
  14 -10  -3  109.07    2.67   0
  15 -23  -3    3.07    3.24   0
  15 -11  -3   11.08    2.06   0
  15  -7  -2   42.77    1.84   0
  15  -3   0   40.87    2.60   0
  15   1   3   11.40    2.55   0
  16 -22  -3    4.30    3.08   0
  16  -8  -2  156.11    2.75   0
  17 -21  -3    0.23    3.04   0
  17 -13  -3   42.50    2.46   0
  17   3   6  131.75    3.89   0
  18 -20  -3    2.79    2.50   0
  18 -18  -3    3.11    2.68   0
  18 -16  -3    8.06    2.34   0
  18  -6  -1   29.81    1.74   0
  18  -4   0  155.10    2.61   0
  19 -17  -3   21.81    1.86   0
  19  -7  -1   96.12    2.55   0
  19   3   7   22.47    2.78   0
  19   5  17   -0.02    3.13   0
  20  -2   2   24.63    2.24   0
  20   2   6   61.73    2.72   0
  20   4  10    6.79    3.29   0
  21 -21  -2    4.30    2.71   0
  22 -20  -2    0.94    2.86   0
  22 -18  -2    9.61    2.59   0
  22 -14  -2    3.11    2.18   0
  23 -17  -2    8.05    1.87   0
  23  -7   0  100.31    2.19   0
  23  -5   1  114.40    2.52   0
  24 -22  -1   -0.05    3.36   0
  24  -6   1   24.07    2.17   0
  24  -4   2   34.56    2.17   0
  24   2   9   34.01    3.02   0
  25 -21  -1    1.00    2.97   0
  25 -13  -1    3.45    2.23   0
  25  -9   0   13.04    2.27   0
  25   1   8    2.92    2.68   0
  26 -18  -1   14.66    2.63   0
  26 -16  -1    0.89    2.52   0
  26 -14  -1   33.63    1.88   0
  26 -10   0    8.47    2.08   0
  26  -4   3   33.46    2.31   0
  26   0   7    0.90    2.25   0
  26   2  12    1.05    3.38   0
  26   2  15    2.27    4.64   0
  27 -11   0    0.01    1.66   0
  27   1  10   30.48    3.16   0
  28 -20   0    3.11    3.33   0
  28 -14   0    6.91    2.44   0
  28  -4   4   30.35    2.49   0
  28   0   9    0.61    2.94   0
  29 -19   0    0.78    2.44   0
  29 -17   0   10.02    2.00   0
  29 -15   0    2.43    1.79   0
  29 -11   1    3.02    2.31   0
  29  -1   8   10.78    2.57   0
  30 -12   1    0.22    2.32   0
  31 -19   1    2.25    3.08   0
  31 -17   1   -0.21    3.02   0
  31 -15   1   10.66    2.48   0
  31 -11   2   30.68    2.55   0
  31  -5   5    0.62    2.37   0
  31  -1  11    4.29    3.02   0
  32 -12   2    1.41    2.41   0
  32  -6   5   10.34    2.50   0
  32  -4   7   57.57    2.81   0
  32  -2  10    0.42    2.92   0
  33 -17   2    1.23    3.35   0
  33 -15   2    9.35    2.88   0
  33  -9   4   25.50    2.54   0
  33  -7   5    7.57    2.58   0
  33  -3  10    3.52    3.29   0
  34 -14   3   10.31    2.88   0
  34 -10   4   12.50    2.85   0
  34  -8   5   27.40    2.67   0
  35  -9   5    4.70    2.12   0
  35  -7   7    0.53    2.65   0
  35  -5   9    0.29    3.19   0
  36 -14   4    2.23    2.94   0
  36 -12   5    2.92    2.91   0
  36  -8   7    1.46    2.98   0
  36  -6   9    3.22    3.34   0
  37 -13   5    4.39    2.59   0
  37 -11   6    4.73    3.33   0
  37  -9   7    3.28    2.99   0
  37  -7   9   -1.10    3.23   0
 -44  -4   8   17.66    2.63   0
 -44  -2  10    5.74    2.60   0
 -43  -3   8    7.26    3.46   0
 -43  -1  10    2.90    3.37   0
 -42 -12   3    2.06    3.74   0
 -42  -2   8    5.83    2.96   0
 -42   0  11    1.37    2.63   0
 -41   1  11    0.80    3.30   0
 -40  -2   7   -0.82    2.54   0
 -40   0   9   14.42    3.08   0
 -40   2  12    5.41    3.36   0
 -39 -11   2    0.52    3.09   0
 -39  -1   7    0.69    2.56   0
 -39   3  13    2.09    3.07   0
 -38  -2   6    7.84    1.92   0
 -38   2  10    5.58    2.68   0
 -37  -1   6   10.28    2.43   0
 -37   1   8    3.84    2.52   0
 -37   3  11   -0.72    2.70   0
 -36  -2   5   14.21    1.96   0
 -36   2   9    0.99    2.43   0
 -36   4  13    3.01    2.87   0
 -35 -15   0    3.13    3.79   0
 -35  -9   1   23.89    2.87   0
 -35   1   7   27.56    2.56   0
 -35   3  10    6.44    1.96   0
 -34 -12   0    6.11    3.28   0
 -34  -8   1   25.31    2.76   0
 -34  -2   4   39.79    2.57   0
 -34   2   8   36.14    1.96   0
 -34   4  11    4.49    2.49   0
 -33  -7   1    1.66    2.31   0
 -33  -5   2   33.56    2.43   0
 -33  -3   3   -0.16    2.36   0
 -33   1   6   13.17    2.43   0
 -33   5  12    1.10    2.70   0
 -33   5  13    5.45    2.25   0
 -32 -16  -1    4.17    4.00   0
 -32  -4   2   44.07    2.47   0
 -32   6  15    3.36    3.32   0
 -31 -13  -1    8.93    3.38   0
 -31   5  11   26.06    1.98   0
 -30   0   4    9.22    2.29   0
 -30   2   6    6.26    1.60   0
 -30   6  13    7.05    2.21   0
 -29  -1   3    8.26    2.26   0
 -29   7  16   -1.05    3.17   0
 -28 -18  -2    5.38    6.48   0
 -28 -16  -2    1.10    4.44   0
 -28  -6   0    4.74    2.20   0
 -28  -2   2   14.22    2.14   0
 -28   2   5   77.76    2.49   0
 -27 -13  -2    9.22    3.67   0
 -27   1   4   33.60    1.82   0
 -27   3   6   27.64    1.74   0
 -27   7  13   13.84    2.88   0
 -27   7  14    2.27    2.11   0
 -26   6  10   81.25    2.51   0
 -24  -2   1   52.26    2.40   0
 -24   2   4   28.10    1.61   0
 -24   4   6   -0.75    2.16   0
 -24   6   9    3.69    2.14   0
 -24   8  15    2.45    2.80   0
 -24   8  16    2.17    3.25   0
 -24   8  17    1.65    3.30   0
 -23   5   7   10.38    2.24   0
 -23   7  11   45.46    1.99   0
 -22 -18  -3    3.76    6.57   0
 -22  -8  -2   54.03    3.12   0
 -22   6   8   14.96    2.07   0
 -22   8  13   12.32    2.66   0
 -22   8  14   23.56    2.04   0
 -21  -1   1   41.44    2.25   0
 -21   3   4   39.34    2.23   0
 -20   2   3   55.34    2.39   0
 -20   4   5    9.41    1.49   0
 -20   8  12   50.94    2.76   0
 -19   1   2  111.20    2.72   0
 -19   5   6   24.47    1.59   0
 -18  -6  -2   53.66    3.06   0
 -18   6   7   44.28    2.37   0
 -18   8  11   18.91    2.41   0
 -17   9  15   15.32    2.70   0
 -17   9  16    1.57    3.02   0
 -17   9  17    6.71    3.28   0
 -15 -15  -4   18.96    4.16   0
 -15  -5  -2    2.87    2.34   0
 -15  -1   0  125.67    2.99   0
 -15   3   3  233.19    3.39   0
 -15   5   5  172.69    2.98   0
 -15   7   8   92.84    2.51   0
 -15   9  14    1.65    2.67   0
 -15   9  15    5.38    2.63   0
 -15   9  16    7.23    2.35   0
 -15   9  17   22.70    3.00   0
 -15   9  18    8.47    3.60   0
 -14 -20  -4    0.61    3.41   0
 -14   8  10   52.94    2.54   0
 -13   9  13   14.98    2.44   0
 -13   9  18    5.52    3.11   0
 -12   6   6  655.38    4.70   0
 -11   9  13    6.93    2.39   0
 -10 -22  -4    9.60    3.74   0
  -9   9  12   11.51    2.41   0
  -8   8   9   71.90    2.56   0
  -7 -23  -4    0.92    3.39   0
  -7   7   7  276.80    3.59   0
  -7   9  12   15.17    2.36   0
  -6   8   9   74.27    2.67   0
  -5   7   7  589.50    5.00   0
  -5   9  12    7.55    2.32   0
  -4  -6  -3   85.41    4.19   0
  -4   8   9   84.71    2.86   0
  -3   9  18    2.37    3.37   0
  -2 -24  -4    5.82    3.09   0
  -1   9  13   63.62    2.91   0
  -1   9  17    2.71    3.07   0
  -1   9  18    5.18    3.81   0
   1 -23  -4    4.60    3.37   0
   1   9  14    3.66    2.95   0
   1   9  15   21.58    3.37   0
   1   9  16    5.88    3.57   0
   2 -10  -4   75.95    2.70   0
   2   6   6  174.57    4.07   0
   2   8  10   44.05    3.03   0
   3 -23  -4    4.34    3.19   0
   4  -4  -2  359.05    4.84   0
   4  -2  -1   90.75    3.45   0
   5 -23  -4    8.07    2.93   0
   5 -11  -4   38.54    2.25   0
   6 -22  -4    5.03    2.95   0
   6   4   4  494.17   15.98   0
   7 -21  -4   27.38    2.68   0
   7   7   9  258.30    5.71   0
   8 -12  -4   34.70    2.20   0
   8   8  14    3.07    3.70   0
   8   8  16   11.27    4.10   0
   9 -21  -4    1.66    1.98   0
   9 -13  -4  130.52    2.83   0
   9  -3  -1  321.81    4.09   0
  10 -20  -4   25.60    2.54   0
  10 -18  -4   46.32    2.61   0
  10 -14  -4   58.59    2.50   0
  10   4   5   11.49    4.08   0
  11 -19  -4   15.94    1.90   0
  11 -17  -4   36.12    2.54   0
  11 -15  -4   29.15    2.38   0
  11  -9  -3   16.95    2.20   0
  12 -24  -3    2.29    3.10   0
  13 -23  -3    9.17    3.21   0
  13   7  15    9.57    5.87   0
  14 -22  -3    0.78    3.01   0
  15 -21  -3    3.20    2.94   0
  15  -5  -1  181.07    2.72   0
  16 -20  -3    0.41    2.59   0
  16 -14  -3   49.37    2.25   0
  16  -2   1   55.70    2.71   0
  17 -19  -3    4.13    2.40   0
  17 -17  -3   29.15    2.58   0
  18 -10  -2   58.33    2.34   0
  19 -23  -2    6.80    2.53   0
  19 -11  -2   15.22    2.20   0
  19  -5   0  143.33    2.81   0
  20 -22  -2    2.11    2.34   0
  20 -20  -2    2.99    2.67   0
  20  -8  -1   28.20    2.11   0
  21 -19  -2   14.60    2.97   0
  21 -17  -2    0.25    2.37   0
  21 -15  -2    1.68    2.26   0
  21 -13  -2   78.34    2.10   0
  21  -9  -1   23.40    2.28   0
  22 -16  -2   10.45    1.83   0
  22 -10  -1    9.25    2.17   0
  22  -2   3   42.76    2.37   0
  23 -11  -1    9.49    2.09   0
  23   3  11    9.35    3.50   0
  24 -20  -1   24.33    3.14   0
  24 -14  -1    5.77    2.20   0
  24   0   6   55.81    2.86   0
  25 -17  -1    4.54    2.47   0
  25 -15  -1    2.95    1.65   0
  25  -5   2   17.74    1.70   0
  26  -8   1    6.92    2.16   0
  26  -6   2   43.34    2.44   0
  26  -2   5   20.60    2.24   0
  26   2  13   -0.47    3.55   0
  26   2  14    0.29    3.98   0
  27 -21   0    5.41    2.67   0
  27 -19   0   21.45    2.94   0
  27 -13   0    6.22    2.30   0
  27  -5   3    5.96    2.29   0
  27   1  11   21.08    3.28   0
  28 -18   0    4.49    2.15   0
  28 -16   0    6.92    2.01   0
  28 -10   1    9.95    1.65   0
  28  -8   2   25.52    2.35   0
  28  -6   3   31.65    2.49   0
  29 -13   1   13.27    2.34   0
  29  -9   2   17.30    2.39   0
  29  -7   3    2.32    2.34   0
  29  -5   4    8.15    1.84   0
  29  -3   6   28.32    2.49   0
  30 -18   1    7.53    3.04   0
  30 -16   1    5.79    2.54   0
  30 -14   1    1.84    1.93   0
  30 -10   2    4.55    2.29   0
  30  -8   3   43.68    2.72   0
  30  -6   4    3.98    2.51   0
  30  -2   8    2.17    2.62   0
  31 -13   2   28.75    2.55   0
  31  -9   3    0.75    2.49   0
  31  -7   4   19.45    2.66   0
  31  -1  12    2.59    3.12   0
  31  -1  13    2.00    3.92   0
  32 -18   2    1.44    3.43   0
  32 -16   2    7.60    3.16   0
  32 -14   2   10.77    2.14   0
  32 -10   3   12.36    1.84   0
  32  -8   4   -0.27    2.31   0
  32  -2  11    5.59    3.07   0
  32  -2  12    0.83    3.74   0
  33 -13   3   15.14    3.11   0
  33  -5   7    4.69    2.05   0
  33  -3  11    2.18    3.44   0
  34 -16   3   13.63    2.51   0
  34 -12   4    8.29    2.76   0
  34  -6   7   -0.12    2.00   0
  35 -15   4   12.49    3.44   0
  35 -13   4    4.76    2.33   0
  35 -11   5    2.77    2.88   0
  35  -9   6    6.08    3.05   0
  36 -14   5    3.48    3.31   0
  36 -10   6    3.60    2.35   0
  36  -8   8    3.16    3.02   0
  36  -6  10    3.12    3.44   0
  37 -11   7    0.05    3.02   0
  37  -9   8    1.52    3.38   0
 -45  -7   6    7.10    3.55   0
 -45  -5   7   -1.71    3.19   0
 -44  -8   5    4.39    3.44   0
 -44  -6   6    5.89    3.38   0
 -44  -4   7   -0.43    2.98   0
 -44  -2   9    3.42    3.53   0
 -43  -9   4   11.91    3.13   0
 -43  -7   5    5.93    2.99   0
 -43  -5   6    2.58    3.13   0
 -43  -1   9   -1.71    2.95   0
 -42  -8   4    7.09    3.17   0
 -42  -6   5   -1.18    2.84   0
 -42  -4   6    1.24    2.99   0
 -42   0  10    1.31    2.91   0
 -41  -7   4    8.21    2.75   0
 -41  -5   5   -2.68    2.64   0
 -41  -3   6   10.31    2.70   0
 -41  -1   8    2.48    2.71   0
 -41   1  10    2.74    2.91   0
 -40 -12   2    0.80    3.20   0
 -40  -8   3   11.96    3.00   0
 -40  -6   4    0.40    2.51   0
 -40  -4   5   13.14    2.81   0
 -40   2  11   12.50    3.25   0
 -39  -7   3    4.77    2.87   0
 -39  -5   4   15.22    2.80   0
 -39  -3   5   11.06    2.42   0
 -39   1   9   11.34    2.74   0
 -39   3  12    0.60    3.27   0
 -38 -14   1    3.86    3.25   0
 -38  -4   4   24.71    2.78   0
 -38   0   7   37.09    3.02   0
 -37 -11   1   15.73    3.26   0
 -37  -5   3   27.70    2.59   0
 -36 -10   1    8.19    2.88   0
 -36   0   6   15.37    2.54   0
 -36   2   8    6.13    2.45   0
 -36   4  12    1.61    2.22   0
 -35 -13   0    7.38    3.55   0
 -35  -1   5    0.79    1.90   0
 -35   3   9   23.06    2.61   0
 -35   5  14   13.38    2.60   0
 -34   2   7   17.99    2.22   0
 -34   4  10   35.47    2.58   0
 -33  -1   4   11.53    2.39   0
 -33   3   8   16.82    2.33   0
 -32 -18  -1    0.91    4.24   0
 -32 -14  -1    6.53    3.74   0
 -32  -6   1   39.06    2.50   0
 -32  -2   3   36.63    2.62   0
 -32   4   9   12.24    1.75   0
 -32   6  13    3.57    2.97   0
 -32   6  14    7.93    2.42   0
 -31  -5   1    4.21    2.13   0
 -31  -3   2    7.41    2.18   0
 -31   1   5    6.17    2.09   0
 -31   3   7   20.93    2.39   0
 -31   5  10   11.74    2.35   0
 -30   4   8   11.34    1.71   0
 -30   6  12   17.59    2.08   0
 -29   3   6   30.68    2.16   0
 -29   5   9   30.89    2.29   0
 -29   7  14    2.76    3.10   0
 -29   7  15   14.64    2.38   0
 -28   0   3    2.49    2.11   0
 -28   4   7    2.04    2.21   0
 -28   6  10    1.46    2.36   0
 -27  -5   0   94.71    2.85   0
 -27  -3   1   47.55    2.40   0
 -27   5   8   18.20    2.35   0
 -27   7  12    6.75    2.71   0
 -26   6   9   31.13    2.31   0
 -26   8  15    1.62    2.81   0
 -26   8  16   17.29    3.36   0
 -25   1   3  303.55    3.34   0
 -25   3   5   72.96    2.06   0
 -25   5   7  123.44    2.60   0
 -25   7  11    6.88    2.19   0
 -24  -6  -1   23.86    2.37   0
 -24   0   2  521.13    4.26   0
 -24   8  13   13.44    2.87   0
 -24   8  14   17.75    2.61   0
 -22   4   5   20.01    2.16   0
 -22   8  12   10.00    2.55   0
 -21   5   6   38.43    2.42   0
 -21   7   9   41.49    2.26   0
 -20  -2   0   15.62    2.25   0
 -20   6   7   69.13    2.52   0
 -20   8  11    4.08    2.47   0
 -19   9  14   21.58    2.66   0
 -19   9  15   17.35    2.96   0
 -19   9  16    4.01    3.06   0
 -19   9  17    2.80    3.41   0
 -18   0   1    0.88    1.58   0
 -17   3   3  325.48    3.59   0
 -17   7   8   45.58    2.33   0
 -17   9  13   27.95    2.68   0
 -17   9  14   11.56    2.58   0
 -17   9  18    1.51    2.68   0
 -16   8  10    4.39    1.69   0
 -15 -17  -4    1.34    3.80   0
 -15   9  13    6.00    2.32   0
 -13   1   1   40.32    2.35   0
 -13   9  12   37.57    2.59   0
 -12 -12  -4   99.04    4.77   0
 -12   8   9  100.95    2.64   0
 -11 -21  -4    4.05    3.44   0
 -11   9  12   47.90    2.09   0
 -10   8   9    8.83    1.55   0
  -9   7   7  658.71    4.86   0
  -8 -22  -4   19.78    3.60   0
  -8   0   0  555.22    6.61   0
  -7   9  11   51.72    2.73   0
  -5 -23  -4   21.25    3.42   0
  -4 -10  -4  117.00    3.62   0
  -3 -23  -4    2.81    3.18   0
  -3   7   7  276.58    3.92   0
  -3   9  12    9.24    2.34   0
  -2 -10  -4  187.68    3.84   0
  -2   8   9   44.91    2.60   0
  -1 -23  -4    6.98    3.16   0
  -1   7   7  441.29    5.08   0
  -1   9  12   16.55    2.68   0
   0 -10  -4    8.65    2.11   0
   1   9  13   37.53    3.11   0
   1   9  17    5.46    3.31   0
   1   9  18    4.00    3.97   0
   2 -22  -4    7.71    2.76   0
   4 -22  -4   12.17    3.02   0
   5 -21  -4   15.34    2.83   0
   5  -7  -3  680.07    5.42   0
   5   5   5  168.82    5.66   0
   6 -20  -4   11.14    2.56   0
   7 -25  -3    3.49    3.65   0
   7 -13  -4   74.12    2.58   0
   7  -1   0   17.97    3.03   0
   8 -20  -4    2.17    2.47   0
   8 -18  -4    0.86    2.16   0
   8 -14  -4   21.15    2.19   0
   8   8  13   19.29    3.81   0
   8   8  17    0.16    4.30   0
   9 -19  -4    1.35    1.94   0
   9 -17  -4   22.55    2.60   0
   9 -15  -4   23.59    2.57   0
  10 -24  -3   15.36    3.07   0
  10 -16  -4   55.72    2.05   0
  11 -23  -3    1.64    3.17   0
  11   7  11   97.06    6.34   0
  12 -22  -3   -0.40    2.65   0
  12 -10  -3   28.35    1.73   0
  13 -21  -3    4.78    2.76   0
  13 -11  -3  179.06    2.86   0
  13  -7  -2   30.12    1.73   0
  13  -1   1  243.80    3.56   0
  13   7  14    7.29    6.51   0
  13   7  16    0.15    6.52   0
  14 -20  -3    6.47    2.44   0
  14 -12  -3   54.72    2.37   0
  15 -13  -3   10.85    2.16   0
  16 -24  -2   10.38    3.26   0
  16 -18  -3    4.69    2.35   0
  16 -16  -3   34.33    2.34   0
  16  -6  -1  127.64    2.77   0
  16  -4   0  385.88    4.04   0
  17 -23  -2    3.37    3.35   0
  18 -22  -2    4.14    3.24   0
  19 -21  -2   13.07    2.78   0
  19 -13  -2   75.82    2.44   0
  20 -18  -2   11.46    2.68   0
  20 -14  -2   41.61    2.42   0
  20  -6   0  232.72    2.80   0
  20  -4   1   47.42    1.87   0
  21  -3   2    3.25    2.05   0
  21   3   9   59.02    3.70   0
  22 -22  -1    6.19    3.06   0
  22   0   5   73.91    2.69   0
  23 -21  -1   -3.50    2.31   0
  23 -19  -1    8.05    2.74   0
  23 -13  -1   11.46    2.25   0
  23   1   7   13.90    2.72   0
  24 -18  -1   11.06    2.18   0
  24 -16  -1    1.55    2.30   0
  24 -10   0   63.05    2.43   0
  24  -2   4   26.76    2.15   0
  25 -21   0    2.70    3.13   0
  25 -11   0   35.89    2.32   0
  26 -20   0   -0.69    3.20   0
  26 -12   0    3.34    1.67   0
  27 -17   0    5.64    1.92   0
  27 -15   0    7.02    1.84   0
  27  -3   5   10.53    2.34   0
  27  -1   7    0.96    2.31   0
  28 -20   1    3.82    3.11   0
  28 -12   1   52.82    2.52   0
  28   0  10   13.50    2.77   0
  29 -19   1   -0.51    2.42   0
  29 -17   1    5.27    2.72   0
  29 -15   1   25.58    2.70   0
  29  -1   9   12.23    2.73   0
  30 -12   2    9.87    2.57   0
  30  -4   6    0.84    2.37   0
  31 -19   2    0.05    3.20   0
  31 -17   2    7.21    3.17   0
  31 -15   2   19.70    2.94   0
  31  -5   6    0.71    2.54   0
  32 -12   3    4.91    2.84   0
  32  -6   6    0.23    2.56   0
  32  -4   8   13.29    2.79   0
  32  -2  13    1.06    3.64   0
  33 -17   3    0.96    3.11   0
  33 -15   3    7.00    2.95   0
  33 -11   4   -1.47    2.81   0
  33  -9   5    1.50    2.41   0
  33  -7   6    3.41    2.67   0
  33  -5   8   11.17    2.80   0
  33  -3  12    6.28    3.43   0
  34 -16   4   -0.74    3.18   0
  34 -14   4    2.23    3.09   0
  34 -10   5   34.61    2.70   0
  34  -8   6    1.21    2.10   0
  34  -6   8   12.72    3.06   0
  34  -4  11    3.32    3.09   0
  34  -4  12    2.62    3.63   0
  35 -13   5   -1.78    3.17   0
  35  -7   8    3.30    2.76   0
  36 -12   6   -0.87    3.34   0
  36 -10   7    2.86    3.25   0
  36  -8   9    0.77    3.06   0
 -45  -3   8    4.32    3.36   0
 -44 -10   4    3.23    3.60   0
 -43  -3   7    3.45    2.96   0
 -43   1  11    2.38    3.25   0
 -42 -10   3    8.22    3.40   0
 -42  -2   7    3.57    3.11   0
 -42   0   9   17.06    3.28   0
 -41 -13   2    2.62    4.05   0
 -41  -9   3    1.33    2.79   0
 -40  -2   6    1.84    2.64   0
 -40   0   8   12.18    2.25   0
 -40   2  10    0.84    2.93   0
 -39  -9   2   24.10    3.29   0
 -39   1   8    7.42    2.65   0
 -38 -12   1    2.11    3.39   0
 -38  -8   2    0.87    2.77   0
 -38  -2   5    2.61    2.52   0
 -38   2   9    4.32    2.57   0
 -38   4  12    4.56    2.85   0
 -38   4  13    7.24    2.59   0
 -37  -7   2    5.02    2.49   0
 -37  -3   4   10.65    2.36   0
 -37   1   7    9.20    2.68   0
 -37   3  10    2.04    2.15   0
 -36 -16   0    0.62    4.02   0
 -36  -6   2    9.16    2.66   0
 -36  -4   3   -0.05    2.42   0
 -36   4  11    4.49    1.95   0
 -35   1   6   -0.66    2.27   0
 -35   5  12   14.20    2.97   0
 -34   0   5   12.00    1.79   0
 -34   4   9    1.06    2.27   0
 -34   6  14   -0.69    3.44   0
 -34   6  15    1.57    2.55   0
 -33  -9   0    6.27    2.99   0
 -32   0   4   18.42    2.36   0
 -32   2   6    5.88    1.73   0
 -32   4   8    2.13    2.15   0
 -32   6  12   14.75    2.90   0
 -31  -1   3   31.36    2.46   0
 -31   5   9    6.25    2.20   0
 -31   7  14   13.34    2.96   0
 -31   7  15    2.54    2.91   0
 -30 -10  -1    1.74    2.88   0
 -30  -4   1   49.96    2.49   0
 -30   2   5   10.50    2.14   0
 -30   6  11    6.65    1.83   0
 -29  -9  -1   13.74    2.87   0
 -29   1   4   32.23    1.85   0
 -29   7  12   34.49    2.67   0
 -29   7  13    4.68    2.20   0
 -28 -14  -2    4.31    3.72   0
 -28  -8  -1    6.35    2.76   0
 -28   8  16    2.55    3.18   0
 -27  -1   2   36.25    1.71   0
 -27   3   5   45.91    2.33   0
 -27   7  11   15.78    2.64   0
 -26  -4   0   32.46    2.62   0
 -26  -2   1   22.67    2.07   0
 -26   2   4   20.16    1.76   0
 -26   4   6   27.00    1.75   0
 -26   8  13    5.10    2.61   0
 -26   8  14    9.37    2.71   0
 -25   7  10   23.39    2.46   0
 -24   6   8   14.66    1.56   0
 -24   8  12   27.58    2.68   0
 -23  -5  -1  108.12    3.25   0
 -23  -3   0   49.15    1.90   0
 -23  -1   1  197.95    3.22   0
 -23   3   4    6.17    2.05   0
 -23   7   9    5.80    2.05   0
 -22   2   3   45.52    1.86   0
 -22   8  11   80.19    2.73   0
 -21  -7  -2   25.45    2.97   0
 -21   1   2   40.61    2.26   0
 -21   9  14   10.32    2.75   0
 -21   9  16    1.47    2.92   0
 -20  -4  -1   46.60    2.41   0
 -20   8  10   12.63    2.21   0
 -19   7   8    6.65    2.18   0
 -19   9  13    7.88    2.63   0
 -18   4   4  326.68    3.57   0
 -18   8  10   76.08    2.13   0
 -17 -23  -3    1.18    4.85   0
 -17  -3  -1   43.60    2.65   0
 -17  -1   0   38.56    2.42   0
 -17   5   5   86.43    2.03   0
 -17   9  12    1.45    2.51   0
 -16   2   2  794.53    5.17   0
 -16   8   9   35.35    2.23   0
 -14 -18  -4    9.44    3.82   0
 -14 -14  -4    7.50    3.76   0
 -14   8   9   37.27    1.85   0
 -13 -13  -4    0.94    3.65   0
 -13   7   7   29.77    2.16   0
 -13   9  11   38.28    2.62   0
 -12 -20  -4    3.34    3.47   0
 -12  -2  -1  221.69    4.44   0
 -10   0   0   79.64    3.11   0
  -9 -21  -4   20.18    3.58   0
  -9 -11  -4    4.40    3.03   0
  -9   5   4   20.16    2.36   0
  -9   9  11   21.18    1.71   0
  -8   4   3  233.57    3.85   0
  -6 -22  -4   23.26    3.15   0
  -6   4   3  139.54    3.47   0
  -5   5   4  140.50    3.27   0
  -5   9  11   28.83    2.38   0
  -4 -22  -4    3.43    3.00   0
  -4   4   3   51.25    2.87   0
  -3   9  11   24.00    2.31   0
  -2 -22  -4    0.37    2.96   0
   0 -22  -4    6.91    3.01   0
   0   8   9   23.88    2.42   0
   1 -21  -4    2.68    2.88   0
   1 -11  -4   39.57    2.64   0
   2  -4  -2 1137.32    9.42   0
   3 -25  -3    0.88    3.70   0
   3 -11  -4    0.70    1.45   0
   3  -7  -3  287.37    4.06   0
   3   9  14    9.80    3.01   0
   3   9  15    1.40    2.68   0
   3   9  16   25.20    3.80   0
   3   9  17    5.74    3.88   0
   4 -20  -4    6.09    2.51   0
   4 -12  -4   61.76    2.50   0
   4   8  10   26.12    2.94   0
   5 -25  -3    1.69    3.53   0
   5 -19  -4    3.78    2.46   0
   5   7   8    4.96    2.77   0
   6 -18  -4   24.87    2.34   0
   6 -14  -4   30.72    2.24   0
   6   8  11   37.95    3.41   0
   7 -19  -4   39.23    2.58   0
   7 -17  -4   52.56    2.65   0
   7 -15  -4   48.11    2.54   0
   8 -24  -3    1.68    3.04   0
   8 -16  -4   17.65    2.37   0
   8   8  18   -0.06    5.20   0
   9 -23  -3    1.21    3.10   0
  10  -6  -2  203.83    3.01   0
  13  -5  -1  539.07    4.64   0
  13  -3   0   51.87    2.47   0
  14 -24  -2    3.56    3.53   0
  14 -18  -3   31.52    2.67   0
  14 -16  -3   25.64    2.25   0
  14  -8  -2   17.61    1.64   0
  14   2   4   75.30    3.21   0
  15 -23  -2    1.61    3.26   0
  15 -17  -3   16.59    1.85   0
  15 -15  -3   28.20    1.78   0
  15  -9  -2    4.30    2.08   0
  16 -22  -2    7.57    2.93   0
  17 -21  -2    0.60    2.87   0
  17 -11  -2   37.45    2.30   0
  17  -7  -1  128.41    2.35   0
  17   1   4   28.70    2.21   0
  18 -20  -2    1.73    2.78   0
  18 -12  -2   66.72    2.37   0
  18  -8  -1    5.95    2.01   0
  19 -23  -1    4.24    3.19   0
  19 -19  -2    1.23    2.07   0
  19 -17  -2    3.10    2.42   0
  19 -15  -2   81.69    2.72   0
  19  -9  -1   88.61    2.50   0
  20 -22  -1    0.66    2.86   0
  20 -10  -1    1.07    2.15   0
  21 -21  -1    1.39    3.03   0
  21  -5   1    6.52    1.54   0
  22 -20  -1    5.83    2.79   0
  22 -18  -1    3.16    2.49   0
  22 -14  -1   72.54    2.49   0
  22 -12  -1   53.96    1.86   0
  22  -8   0   41.33    1.90   0
  22  -6   1  172.57    2.94   0
  22  -4   2   86.97    2.51   0
  22   2   8   27.11    2.91   0
  23 -17  -1   19.30    1.98   0
  23 -15  -1   20.32    1.85   0
  23  -9   0    6.32    1.66   0
  23  -3   3   11.68    1.50   0
  23   3  12    5.07    3.46   0
  24 -22   0   -1.70    3.07   0
  24   2  10   25.38    3.10   0
  25 -19   0    6.07    3.08   0
  25 -13   0   75.63    2.56   0
  25  -9   1   15.06    2.12   0
  25  -3   4   23.99    2.22   0
  25   1   9   17.99    2.93   0
  26 -18   0    5.59    2.14   0
  26 -16   0   12.99    1.90   0
  26 -10   1   28.24    2.33   0
  26  -4   4    4.31    2.11   0
  26   0   8   -0.67    2.25   0
  27 -11   1   31.33    1.74   0
  27   1  12    2.64    2.99   0
  27   1  13    1.32    3.58   0
  27   1  15    3.15    4.36   0
  28 -18   1    9.86    2.99   0
  28 -16   1    8.96    2.61   0
  28 -14   1   51.38    2.48   0
  28 -10   2   -2.01    2.31   0
  28  -4   5    5.60    2.40   0
  28   0  11    2.09    3.04   0
  29 -11   2    5.42    2.17   0
  29  -5   5   -0.18    2.35   0
  29  -1  10   14.13    3.30   0
  30 -18   2    1.67    3.10   0
  30 -16   2    7.30    2.79   0
  30 -14   2   21.06    2.65   0
  30 -10   3    2.89    2.45   0
  30  -6   5   18.99    2.50   0
  30  -2   9    4.64    2.50   0
  31 -11   3    8.72    1.89   0
  31  -7   5    2.09    2.53   0
  32 -18   3    3.72    3.22   0
  32 -16   3    8.74    3.22   0
  32 -14   3    5.74    2.15   0
  32 -10   4    4.18    1.87   0
  32  -8   5   10.06    2.37   0
  33 -13   4   10.63    3.13   0
  33  -5   9    4.63    2.82   0
  34 -12   5    3.91    2.98   0
  34 -10   6    3.59    2.71   0
  34  -8   7   -0.18    2.95   0
  34  -6   9    2.69    3.08   0
  35 -15   5    4.16    3.06   0
  35 -11   6    5.42    2.88   0
  35  -9   7   -0.17    2.79   0
  35  -7   9    6.71    3.21   0
  36 -12   7    7.74    3.39   0
  36 -10   8    4.07    3.47   0
 -44  -6   5   -0.57    3.03   0
 -44  -2   8    3.02    2.48   0
 -44   0  10    4.07    3.14   0
 -43 -11   3    4.07    3.69   0
 -43  -5   5   12.03    2.93   0
 -43  -1   8   12.65    3.08   0
 -43   1  10    4.40    3.08   0
 -42   2  11    5.78    3.50   0
 -41  -1   7    9.41    2.68   0
 -41   1   9    2.06    2.92   0
 -40 -10   2    2.56    3.14   0
 -40   0   7    2.91    2.67   0
 -39 -13   1    1.33    3.78   0
 -39  -1   6    0.17    1.96   0
 -38   0   6    1.49    2.48   0
 -38   2   8   32.19    2.62   0
 -38   4  11    2.77    2.86   0
 -37  -1   5   15.97    2.40   0
 -37   5  13    2.51    3.04   0
 -36 -14   0    5.43    3.69   0
 -36  -8   1    5.76    3.01   0
 -36  -2   4    6.47    1.85   0
 -36   2   7    1.06    2.49   0
 -36   4  10    5.10    2.51   0
 -35 -11   0   31.83    3.53   0
 -35  -5   2    4.91    2.28   0
 -35  -3   3   19.15    1.88   0
 -35  -1   4    5.08    2.34   0
 -35   3   8   16.70    1.89   0
 -34 -10   0    7.95    2.82   0
 -34  -4   2   13.21    2.40   0
 -34  -2   3    8.19    2.26   0
 -34   6  13   14.87    2.45   0
 -33   1   5   12.93    2.26   0
 -33   3   7   20.20    2.33   0
 -33   5  10   13.38    1.87   0
 -33   7  15    2.84    3.44   0
 -32   6  11   38.80    2.72   0
 -31 -11  -1    0.48    2.49   0
 -31  -7   0   20.35    2.43   0
 -31   3   6    3.23    2.19   0
 -30  -6   0   69.43    2.70   0
 -30   4   7   25.71    1.84   0
 -29   7  11    5.07    2.32   0
 -28   2   4    9.22    2.14   0
 -28   4   6   20.60    2.33   0
 -28   6   9    8.85    1.73   0
 -28   8  14   11.34    2.87   0
 -28   8  15    7.49    2.36   0
 -27  -7  -1   30.54    2.56   0
 -27   1   3   63.52    2.36   0
 -27   5   7   10.20    2.25   0
 -27   7  10    3.20    2.26   0
 -26   0   2   37.98    2.16   0
 -26   6   8   12.45    2.23   0
 -26   8  12    4.05    2.67   0
 -25   9  16   12.79    3.16   0
 -24   4   5    0.03    2.14   0
 -24   8  11    2.95    2.45   0
 -23   5   6   69.48    2.02   0
 -23   9  14    5.74    2.78   0
 -23   9  15   13.69    2.93   0
 -23   9  16    2.69    2.35   0
 -23   9  17    8.19    2.69   0
 -22   6   7   12.09    1.67   0
 -22   8  10   50.96    2.43   0
 -21 -11  -3    6.15    4.09   0
 -21   7   8   12.28    2.15   0
 -21   9  13   10.28    2.63   0
 -20   0   1   21.91    1.73   0
 -20   4   4  135.75    2.74   0
 -19   3   3  197.10    3.09   0
 -19   5   5  157.65    2.73   0
 -18 -22  -3    1.58    4.78   0
 -18   2   2  261.49    3.55   0
 -18   6   6   35.93    2.13   0
 -18   8   9    2.74    2.18   0
 -17   9  11    6.56    2.23   0
 -16  10  16    9.00    2.82   0
 -16  10  17    1.59    3.02   0
 -15   1   1   25.98    1.79   0
 -15   7   7   15.61    1.54   0
 -15   9  11   13.26    2.27   0
 -14 -16  -4    4.64    3.73   0
 -14  10  15   -0.67    2.74   0
 -14  10  16   15.02    3.09   0
 -14  10  17    1.94    3.34   0
 -14  10  18    7.51    3.31   0
 -12   0   0  522.39    5.52   0
 -12   4   3  180.77    3.43   0
 -12   8   8   71.79    2.30   0
 -12  10  14   21.49    2.82   0
 -12  10  15    0.75    2.82   0
 -12  10  16    3.76    2.81   0
 -12  10  18   24.07    3.58   0
 -11   5   4  101.02    2.82   0
 -11   9  10   31.87    2.29   0
 -10 -20  -4    0.24    3.11   0
 -10   4   3    6.61    1.54   0
 -10   8   8  142.35    2.80   0
 -10  10  14    3.24    2.63   0
 -10  10  16    4.20    2.78   0
 -10  10  17    1.83    3.36   0
 -10  10  18    0.16    3.59   0
  -9   3   2  110.47    3.25   0
  -9   9  10   11.45    2.32   0
  -8  10  14    9.14    2.69   0
  -8  10  15   -2.65    2.75   0
  -8  10  16    0.65    2.72   0
  -8  10  17    9.67    3.25   0
  -8  10  18   18.78    3.72   0
  -7 -21  -4    7.29    3.37   0
  -7   3   2   37.32    2.39   0
  -7   9  10   16.61    2.23   0
  -6   6   5   13.60    2.22   0
  -6   8   8  304.47    3.82   0
  -6  10  14    7.42    2.86   0
  -6  10  15    3.64    2.84   0
  -6  10  16   -0.20    2.99   0
  -6  10  17   10.72    3.29   0
  -5 -21  -4    2.57    3.01   0
  -5   3   2   59.25    2.68   0
  -4   6   5    2.38    2.19   0
  -4   8   8  161.97    3.15   0
  -4  10  16    7.45    3.20   0
  -3 -21  -4    1.25    3.19   0
  -1 -25  -3    0.72    3.85   0
  -1 -21  -4    5.67    2.75   0
  -1 -11  -4   63.14    2.81   0
  -1   9  11    7.02    2.25   0
   1 -25  -3    0.06    3.67   0
   1   7   7  102.84    3.07   0
   1   9  12   18.04    2.61   0
   2 -20  -4   29.51    2.78   0
   2 -12  -4  233.43    3.59   0
   3 -19  -4    5.13    2.46   0
   3   9  13   41.24    3.24   0
   3   9  18    2.98    4.12   0
   4 -24  -3    0.18    3.04   0
   4 -18  -4   12.84    2.39   0
   4   6   6   77.71    3.66   0
   5 -17  -4    4.07    2.36   0
   5 -15  -4   62.61    2.55   0
   6 -24  -3    3.81    2.99   0
   6  -8  -3   52.95    2.17   0
   7 -23  -3   12.93    3.16   0
   7  -3  -1  606.05    5.86   0
   8   8  12    4.10    3.59   0
  10 -22  -3   21.26    2.25   0
  10 -10  -3   57.88    2.04   0
  10  -2   0  551.69    5.35   0
  11 -21  -3    4.58    2.58   0
  11 -11  -3   22.47    2.09   0
  11  -7  -2    0.48    2.13   0
  12 -24  -2    5.96    3.36   0
  12 -20  -3    5.29    2.44   0
  12 -12  -3   82.34    2.43   0
  13 -15  -3   45.99    2.58   0
  13 -13  -3   44.88    1.84   0
  14  -6  -1   65.93    2.42   0
  17 -19  -2    9.77    2.68   0
  17 -13  -2    3.12    2.04   0
  17  -5   0    8.97    1.65   0
  18 -18  -2    4.96    2.44   0
  18 -16  -2    9.36    2.38   0
  18 -14  -2   36.47    2.20   0
  18  -6   0    6.23    2.02   0
  18  -2   2  103.56    2.83   0
  18   4   9    0.72    3.22   0
  19   1   5   10.08    2.22   0
  20   4  11   18.37    3.72   0
  21 -19  -1    3.40    2.81   0
  21   1   6    7.37    2.17   0
  22 -22   0    4.00    3.00   0
  22 -16  -1   24.19    1.88   0
  23 -21   0   -1.09    3.20   0
  23 -11   0   58.05    2.48   0
  23  -7   1   23.11    1.78   0
  23  -5   2   30.38    1.65   0
  23   3  13    2.94    3.58   0
  23   3  16    0.18    4.30   0
  24 -20   0    4.61    2.85   0
  24 -18   0    1.69    2.47   0
  24 -12   0   89.33    2.11   0
  24  -8   1    6.61    1.62   0
  24  -6   2    7.97    2.09   0
  24  -4   3   43.06    1.75   0
  25 -17   0   19.85    1.88   0
  25 -15   0   18.88    1.78   0
  25  -7   2   95.83    2.65   0
  25  -5   3   15.19    2.22   0
  26 -20   1    2.20    3.25   0
  26 -12   1   12.19    2.20   0
  26  -8   2    9.92    2.12   0
  26  -6   3   26.98    2.40   0
  27 -19   1    0.65    2.34   0
  27 -17   1   -0.06    2.61   0
  27 -15   1   17.50    2.47   0
  27 -13   1   32.70    1.94   0
  27  -9   2    8.06    2.18   0
  27  -7   3   25.95    2.39   0
  27  -5   4   11.62    2.34   0
  27  -1   8    3.88    2.37   0
  27   1  14    1.39    3.76   0
  28 -20   2    5.05    3.18   0
  28  -8   3  102.98    2.84   0
  28  -6   4    4.46    2.35   0
  28   0  12    0.60    3.32   0
  29 -19   2    1.55    3.05   0
  29 -17   2    7.51    2.90   0
  29 -15   2   -0.07    2.56   0
  29 -13   2    7.02    2.24   0
  29  -9   3    8.71    1.79   0
  29  -7   4   20.02    2.38   0
  30 -12   3    1.54    2.43   0
  30  -8   4   15.48    1.96   0
  30  -4   7   13.59    2.61   0
  30  -2  10    8.67    2.89   0
  31 -17   3    4.36    3.27   0
  31 -15   3    1.80    2.91   0
  31 -13   3    2.01    1.98   0
  31  -5   7   32.53    2.96   0
  31  -3  10   16.75    3.10   0
  32 -12   4    3.34    2.91   0
  32  -6   7   21.49    2.83   0
  33 -17   4    5.91    2.67   0
  33 -15   4    2.36    2.45   0
  33 -11   5   10.09    2.82   0
  33  -9   6    3.85    2.68   0
  33  -7   7    5.13    2.09   0
  33  -5  10    3.10    3.28   0
  34 -14   5    5.02    2.88   0
  34  -6  10   -1.11    3.24   0
  35 -13   6    1.89    3.01   0
  35 -11   7    0.30    3.18   0
  35  -9   8    2.25    3.24   0
  35  -7  10    9.22    3.41   0
 -46  -4   7    6.84    3.59   0
 -45  -7   5    1.13    3.19   0
 -45  -5   6    3.85    2.51   0
 -45  -3   7    0.31    3.44   0
 -45  -1   9   -0.10    2.67   0
 -44  -8   4    0.35    3.35   0
 -44  -4   6   13.01    2.36   0
 -44  -2   7    3.39    2.95   0
 -44   0   9    1.31    3.15   0
 -43  -7   4    4.46    2.96   0
 -43  -3   6    0.21    3.07   0
 -42  -8   3    7.12    2.89   0
 -42  -6   4    9.72    2.31   0
 -42  -4   5    2.58    2.16   0
 -42  -2   6    1.35    3.01   0
 -42   0   8    6.96    2.22   0
 -42   2  10    5.53    3.42   0
 -41 -11   2    8.46    3.38   0
 -41  -7   3    1.48    3.04   0
 -41  -5   4    3.99    2.71   0
 -41  -3   5   13.21    3.07   0
 -41   3  11    2.79    3.47   0
 -40  -6   3    0.50    2.76   0
 -40  -4   4    6.04    2.82   0
 -40  -2   5   11.13    2.55   0
 -40   2   9    4.54    2.26   0
 -40   4  12    3.63    3.47   0
 -39  -5   3    9.16    2.76   0
 -39  -3   4    9.02    2.74   0
 -39   1   7    3.58    2.92   0
 -38 -10   1   17.95    3.27   0
 -37  -9   1    9.19    2.86   0
 -37   1   6   12.39    2.41   0
 -37   5  12   14.64    2.33   0
 -36 -12   0    2.96    3.40   0
 -36   0   5   31.93    2.50   0
 -36   4   9    7.83    2.55   0
 -36   6  13   -1.28    3.43   0
 -36   6  14    1.48    2.70   0
 -35  -7   1    5.18    2.36   0
 -35   5  10   13.43    2.63   0
 -34  -6   1   19.61    2.67   0
 -34   2   6   16.23    1.81   0
 -34   4   8   10.91    2.40   0
 -33 -17  -1    0.73    4.26   0
 -33 -15  -1   10.56    3.78   0
 -33  -5   1    7.28    2.41   0
 -33  -3   2    6.55    2.41   0
 -33  -1   3   23.29    2.32   0
 -33   5   9   12.96    2.49   0
 -33   7  13    6.21    3.33   0
 -33   7  14    1.94    2.62   0
 -32 -12  -1   19.20    3.16   0
 -32   4   7    5.44    2.21   0
 -32   6  10    6.68    2.51   0
 -31   1   4   16.16    1.67   0
 -31   5   8   16.04    2.33   0
 -31   7  12    0.55    2.67   0
 -30   0   3    3.25    1.65   0
 -30   6   9    2.19    2.31   0
 -30   8  14    2.49    3.22   0
 -30   8  15    1.48    3.03   0
 -29 -15  -2    0.88    4.78   0
 -29  -5   0   85.35    2.68   0
 -29  -1   2   73.36    2.57   0
 -28   8  12    2.27    2.60   0
 -28   8  13    3.40    2.18   0
 -27 -11  -2    4.75    3.01   0
 -27   9  16    0.14    3.11   0
 -26 -10  -2    1.76    2.86   0
 -26  -6  -1  116.64    3.15   0
 -26   4   5    6.83    2.16   0
 -26   8  11    9.00    2.56   0
 -25  -9  -2   21.67    3.06   0
 -25  -3   0  116.71    2.89   0
 -25  -1   1    5.91    2.06   0
 -25   3   4    9.18    1.63   0
 -25   5   6    9.44    2.17   0
 -25   7   9   27.93    1.81   0
 -25   9  14    3.50    2.88   0
 -25   9  15   17.84    3.00   0
 -24   2   3   26.60    1.66   0
 -24   6   7   -0.04    2.13   0
 -23   1   2    1.22    1.54   0
 -23   7   8   13.08    2.15   0
 -23   9  13    1.23    2.44   0
 -22 -12  -3   11.40    4.18   0
 -22  -2   0   29.37    2.23   0
 -21   3   3  277.75    3.28   0
 -21   5   5   51.31    2.28   0
 -21   9  12    4.29    2.40   0
 -20 -10  -3    8.14    3.90   0
 -20  -6  -2   20.69    2.68   0
 -20   6   6  162.49    2.79   0
 -20   8   9   18.93    2.27   0
 -20  10  16   11.81    3.06   0
 -20  10  17   -0.19    3.10   0
 -19 -21  -3    1.65    4.36   0
 -19  -1   0   63.04    2.52   0
 -19   7   7   20.22    2.15   0
 -19   9  11   54.10    2.81   0
 -18  10  14   14.51    2.70   0
 -18  10  15    9.56    3.00   0
 -18  10  17    3.12    3.39   0
 -17  -5  -2   22.67    2.72   0
 -17   1   1   51.29    2.50   0
 -17   7   7  100.01    2.07   0
 -16  -8  -3   12.33    3.80   0
 -16  10  14   10.72    2.82   0
 -16  10  15   -0.77    2.09   0
 -15   9  10   17.45    2.36   0
 -14  -2  -1    0.71    2.08   0
 -14   4   3   46.12    2.52   0
 -14   8   8  106.09    2.65   0
 -14  10  13   16.50    2.74   0
 -14  10  14    3.90    2.08   0
 -13 -17  -4   26.30    3.69   0
 -13   5   4   65.84    2.10   0
 -13   9  10   30.94    2.44   0
 -12 -24  -3    3.17    3.96   0
 -12 -18  -4    4.12    3.31   0
 -12   6   5   10.65    2.09   0
 -12  10  13    1.68    2.57   0
 -11 -19  -4   23.11    3.29   0
 -10 -12  -4   15.27    3.20   0
 -10  10  13    2.05    2.62   0
  -9   7   6  216.99    3.45   0
  -8 -20  -4   29.30    3.31   0
  -8  10  13   54.33    2.99   0
  -7 -11  -4   54.78    3.25   0
  -7   7   6   24.98    2.29   0
  -6  10  13    1.25    2.56   0
  -6  10  18    2.70    3.45   0
  -5 -25  -3    1.07    3.66   0
  -5 -11  -4   53.13    3.18   0
  -5   9  10   61.56    2.58   0
  -4 -20  -4   10.35    3.03   0
  -4  10  15   13.81    2.92   0
  -4  10  17    9.45    3.29   0
  -4  10  18    5.47    3.75   0
  -3 -25  -3   -0.24    3.58   0
  -3 -11  -4  129.31    3.41   0
  -2 -20  -4    9.14    2.83   0
  -2   8   8   26.30    2.70   0
  -2  10  15    1.03    3.24   0
  -2  10  16    5.59    3.29   0
  -1   5   4  218.81    4.38   0
   0 -20  -4   66.42    3.03   0
   0 -12  -4    5.58    2.22   0
   1 -19  -4   13.60    2.66   0
   1  -7  -3  157.21    3.46   0
   2 -24  -3    4.86    3.36   0
   2 -18  -4   18.37    2.57   0
   2   8   9   57.85    2.72   0
   3 -17  -4   -0.49    2.27   0
   3 -13  -4   73.30    2.64   0
   4 -16  -4   15.55    2.31   0
   4 -14  -4    7.07    2.10   0
   5 -23  -3    4.75    3.13   0
   5  -5  -2   16.93    2.42   0
   5   9  15    9.45    3.53   0
   5   9  16    3.23    3.34   0
   8 -10  -3    7.30    2.18   0
   8  -6  -2  320.52    3.93   0
   9 -25  -2    7.67    3.58   0
   9 -21  -3    2.81    2.77   0
  10 -24  -2    1.76    3.06   0
  10 -20  -3   14.79    2.72   0
  10 -12  -3   15.18    2.00   0
  10   2   3   44.79    3.40   0
  11 -19  -3   10.57    2.51   0
  11 -13  -3   12.29    2.09   0
  12 -18  -3    1.46    1.82   0
  12 -16  -3   18.11    2.40   0
  12 -14  -3    0.80    1.99   0
  12  -8  -2   10.97    1.58   0
  13 -23  -2   19.51    2.44   0
  13  -9  -2  119.72    2.70   0
  14 -22  -2    1.43    2.81   0
  14 -10  -2   20.94    2.16   0
  14  -4   0  494.31    4.57   0
  14  -2   1    0.52    2.23   0
  15 -21  -2    0.88    2.54   0
  15 -11  -2   47.64    2.40   0
  15  -7  -1    6.89    2.12   0
  15  -1   2   89.99    2.86   0
  15   5   9    8.76    4.24   0
  16 -24  -1   11.27    3.27   0
  16 -20  -2   17.61    2.04   0
  16 -18  -2    0.13    2.32   0
  16 -12  -2   67.15    2.41   0
  16   2   5   45.29    2.85   0
  17 -23  -1    7.47    3.31   0
  17 -17  -2    8.54    2.32   0
  17 -15  -2    6.50    2.31   0
  18 -22  -1    2.25    3.09   0
  18  -4   1    3.81    2.05   0
  19 -21  -1    9.78    2.71   0
  19 -11  -1   32.76    2.36   0
  19  -3   2    8.23    2.16   0
  19   3   8   14.56    2.72   0
  20 -20  -1    0.31    2.21   0
  20 -18  -1    4.06    2.63   0
  20 -12  -1   11.35    1.65   0
  20  -8   0   40.01    2.25   0
  20  -2   3    5.32    2.14   0
  20   2   7   47.01    2.66   0
  21 -17  -1    2.02    1.82   0
  21 -15  -1    6.20    1.75   0
  21  -9   0   15.51    2.24   0
  22 -10   0   10.45    1.68   0
  22  -2   4   74.57    2.48   0
  23 -19   0    2.80    2.88   0
  23 -13   0   12.12    2.27   0
  23   3  14   12.87    3.95   0
  23   3  15    0.39    4.31   0
  24 -16   0    2.27    1.80   0
  24 -14   0   31.43    1.85   0
  24  -2   5   10.97    2.15   0
  24   0   7    0.65    2.18   0
  24   2  11    7.04    3.07   0
  25 -21   1    4.55    3.05   0
  25 -11   1    0.18    2.15   0
  25   1  10   41.25    3.21   0
  26 -18   1    0.01    2.91   0
  26 -16   1    3.93    2.46   0
  26 -14   1    7.38    2.43   0
  26   0   9   34.97    2.77   0
  27 -11   2    4.56    2.23   0
  27  -3   6    4.82    2.26   0
  28 -18   2    5.40    2.92   0
  28 -16   2    0.14    2.36   0
  28 -14   2    2.98    2.51   0
  28 -12   2    3.54    1.73   0
  28  -4   6   14.02    2.42   0
  28   0  13    1.07    3.58   0
  28   0  14    1.05    3.77   0
  29  -5   6   35.42    2.43   0
  29  -1  12    4.23    3.20   0
  30 -18   3    6.08    3.31   0
  30 -16   3    9.82    3.02   0
  30 -14   3    5.90    2.80   0
  30 -10   4    2.36    2.30   0
  30  -6   6    8.39    2.46   0
  30  -2  11   13.39    3.07   0
  31 -11   4   18.16    2.60   0
  31  -9   5    7.00    2.62   0
  31  -7   6    5.81    2.55   0
  31  -3  11    2.33    3.28   0
  32 -16   4    8.06    3.02   0
  32 -14   4    3.70    2.32   0
  32 -10   5    3.17    1.97   0
  32  -8   6    0.19    1.81   0
  32  -6   8    2.95    2.55   0
  33 -15   5    1.34    3.21   0
  33 -13   5    4.39    2.73   0
  33  -7   8    3.01    2.94   0
  34 -14   6    1.72    3.27   0
  34 -12   6    1.51    2.27   0
  34 -10   7    4.27    3.07   0
  34  -8   8    1.63    2.25   0
  34  -6  11    9.51    3.51   0
  35 -13   7   -2.23    3.50   0
  35 -11   8    2.18    3.03   0
  35  -9   9    3.89    3.39   0
 -45  -1   8    1.99    3.51   0
 -44 -10   3    0.87    3.73   0
 -43  -9   3    2.59    3.35   0
 -43  -1   7   -0.74    3.06   0
 -43   1   9   -1.68    2.84   0
 -42 -12   2    5.42    3.60   0
 -41  -1   6   30.87    2.74   0
 -41   3  10    6.51    3.29   0
 -40 -14   1    1.29    4.09   0
 -40  -8   2   -0.19    2.94   0
 -40   2   8    4.72    2.80   0
 -39 -11   1    2.64    3.13   0
 -39  -7   2   19.18    2.94   0
 -39  -1   5   18.87    2.76   0
 -39   3   9    3.16    2.67   0
 -39   5  12    0.11    3.38   0
 -38  -6   2    1.79    2.64   0
 -38  -4   3    5.76    2.07   0
 -38  -2   4    9.68    2.57   0
 -38   2   7   18.75    2.80   0
 -38   4  10   20.94    2.15   0
 -37 -15   0    2.06    4.21   0
 -37  -5   2    1.24    2.64   0
 -37  -3   3   29.65    2.64   0
 -37   3   8    1.26    2.00   0
 -37   5  11    2.31    2.27   0
 -35   1   5    3.48    2.31   0
 -35   3   7    2.04    1.78   0
 -35   7  14    4.73    3.57   0
 -34   0   4   -0.30    1.71   0
 -33 -13  -1    1.74    3.46   0
 -33   3   6   17.96    2.41   0
 -33   7  12    9.93    3.02   0
 -32  -4   1    2.44    2.22   0
 -32  -2   2   27.37    2.49   0
 -32   8  14   16.59    3.03   0
 -32   8  15   11.09    3.48   0
 -31   7  11    3.91    2.51   0
 -30   2   4   19.80    2.20   0
 -30   4   6    2.41    2.15   0
 -30   8  13   15.43    2.82   0
 -29 -17  -2    4.86    5.94   0
 -29   1   3    8.52    2.22   0
 -29   5   7   15.82    1.71   0
 -29   7  10   14.74    1.87   0
 -28 -12  -2    2.24    3.30   0
 -28  -4   0   34.11    2.41   0
 -28  -2   1  104.70    2.76   0
 -28   6   8   17.05    1.63   0
 -27   3   4    0.64    2.07   0
 -27   5   6    7.42    2.11   0
 -27   7   9   13.01    2.29   0
 -27   9  14    7.96    3.09   0
 -27   9  15    2.56    3.02   0
 -26   2   3   62.04    2.41   0
 -26   6   7   26.32    2.31   0
 -25  -5  -1   64.39    2.99   0
 -25   7   8   -0.18    2.10   0
 -25   9  13    6.81    2.67   0
 -24  -8  -2    1.79    2.62   0
 -24   8  10   10.14    1.70   0
 -23 -13  -3   15.33    5.20   0
 -23   5   5  264.17    3.19   0
 -23   9  12    1.61    1.93   0
 -22   0   1    4.68    1.57   0
 -22   4   4  100.95    2.05   0
 -22   6   6   22.06    2.27   0
 -22   8   9    4.79    2.25   0
 -22  10  15    4.02    2.81   0
 -22  10  16    4.28    3.33   0
 -22  10  17    0.73    3.59   0
 -21 -19  -3   10.12    5.35   0
 -21   7   7    4.06    2.08   0
 -21   9  11    5.99    2.55   0
 -20 -20  -3   11.75    5.12   0
 -20   2   2   92.52    2.21   0
 -20  10  15    3.02    2.73   0
 -19  -3  -1   78.66    2.72   0
 -18   8   8   37.38    2.37   0
 -18  10  13    4.85    2.51   0
 -17   5   4   73.90    2.49   0
 -17   9  10    5.42    2.35   0
 -16   4   3  102.69    2.75   0
 -16   6   5    1.18    2.02   0
 -16  10  13    7.74    2.47   0
 -15 -23  -3    7.27    4.08   0
 -15   5   4   60.78    2.07   0
 -14   0   0    2.26    1.95   0
 -14   6   5   46.86    1.93   0
 -14  10  12   -0.11    2.32   0
 -13 -15  -4   37.60    3.72   0
 -13  -7  -3   37.62    5.27   0
 -13   3   2    0.71    1.62   0
 -13   7   6   17.51    2.26   0
 -12  10  12   17.47    2.51   0
 -11 -13  -4   14.24    3.23   0
 -11   7   6  120.10    2.46   0
 -11   9   9    4.94    1.97   0
 -10 -24  -3   -0.51    4.03   0
 -10  10  12   13.09    2.53   0
  -9 -19  -4   33.35    3.26   0
  -9   9   9   13.40    2.08   0
  -8 -24  -3   -0.15    3.95   0
  -8   2   1   53.62    3.22   0
  -8  10  12  131.10    3.29   0
  -6  10  12    3.38    2.77   0
  -5 -19  -4   -0.02    2.88   0
  -4 -24  -3    0.93    3.56   0
  -4  10  13   21.60    2.68   0
  -3 -19  -4   10.89    2.61   0
  -2 -24  -3    4.96    3.39   0
  -2 -12  -4  249.36    3.93   0
  -2  10  14   24.43    2.93   0
  -2  10  17    3.69    3.30   0
  -2  10  18   10.82    3.92   0
  -1 -19  -4    9.47    2.68   0
   0 -24  -3    2.22    2.99   0
   0 -18  -4   12.36    2.57   0
   1 -17  -4    0.90    2.27   0
   1 -15  -4    2.19    2.15   0
   1 -13  -4    9.08    2.31   0
   1   9  11    6.43    2.47   0
   2 -16  -4    3.01    2.19   0
   3 -23  -3    3.81    3.08   0
   5   9  14    1.27    3.04   0
   5   9  17   -0.65    4.05   0
   7 -25  -2    1.70    3.53   0
   7 -21  -3    2.01    2.72   0
   8 -20  -3   28.86    2.85   0
   8   6   7    4.25    3.62   0
   9 -19  -3   18.45    2.52   0
   9 -11  -3   50.11    1.84   0
  10 -18  -3   92.54    2.91   0
  10 -16  -3   63.29    2.66   0
  10 -14  -3    4.82    2.11   0
  10   8  14   30.41    5.01   0
  10   8  15    4.63    4.43   0
  10   8  16    4.56    4.59   0
  11 -23  -2    0.94    2.87   0
  11 -17  -3   14.82    1.84   0
  11 -15  -3   50.95    2.39   0
  11  -5  -1  227.65    3.62   0
  11  -1   1 1485.70    8.87   0
  12 -22  -2    7.12    2.96   0
  13 -21  -2   16.71    2.85   0
  13   1   3  289.51    4.60   0
  13   3   5   93.46    3.64   0
  14 -24  -1    0.90    3.40   0
  15 -23  -1    5.45    2.93   0
  15 -19  -2   26.50    2.59   0
  15 -13  -2    8.22    2.16   0
  16 -22  -1    7.44    2.85   0
  16 -16  -2   26.95    2.28   0
  16  -8  -1   77.05    2.00   0
  17 -21  -1    3.67    2.59   0
  17  -9  -1   16.73    1.57   0
  17   5  11    6.47    4.11   0
  18 -20  -1    6.69    2.87   0
  18 -10  -1   26.94    1.81   0
  18   2   6  164.69    3.62   0
  19 -23   0    2.95    3.49   0
  19 -19  -1    8.32    2.61   0
  19 -17  -1   12.16    2.28   0
  19 -13  -1   13.12    2.15   0
  19  -5   1  163.71    2.54   0
  20 -22   0    6.87    3.23   0
  20 -16  -1   38.84    1.86   0
  20 -14  -1   48.69    1.83   0
  20  -6   1   54.38    2.35   0
  20  -4   2    6.64    2.15   0
  20   4  12    2.23    3.94   0
  21 -21   0    3.29    2.90   0
  21  -7   1   51.79    2.32   0
  21  -3   3   12.96    2.12   0
  21   3  10    2.13    3.03   0
  22 -20   0    5.58    2.30   0
  22 -18   0   21.38    2.56   0
  22 -12   0    0.93    2.25   0
  22  -8   1   25.00    2.35   0
  22   0   6   10.72    2.24   0
  22   2   9   17.51    2.89   0
  23 -17   0    1.83    1.78   0
  23 -15   0   67.27    2.04   0
  23  -9   1    5.50    2.15   0
  23  -3   4   72.34    2.43   0
  23   1   8   42.51    2.71   0
  24 -20   1    3.57    3.32   0
  24 -10   1    2.74    1.56   0
  24   2  12   13.64    3.22   0
  25 -19   1   12.06    2.22   0
  25 -17   1   25.68    2.61   0
  25 -15   1   10.56    2.42   0
  25 -13   1    2.05    2.31   0
  25  -9   2   21.63    2.17   0
  25  -3   5   36.39    2.31   0
  25  -1   7   41.21    2.49   0
  26 -20   2    0.70    3.05   0
  26 -10   2    3.58    2.25   0
  26  -4   5   39.40    2.49   0
  27 -19   2    6.18    2.89   0
  27 -17   2   20.85    2.61   0
  27 -13   2   10.62    2.33   0
  27  -9   3   23.15    2.35   0
  27  -1   9   -0.00    2.57   0
  28 -10   3   19.69    2.44   0
  28  -6   5   19.56    2.35   0
  29 -19   3    3.52    3.04   0
  29 -17   3   -0.53    3.01   0
  29 -15   3    9.15    2.64   0
  29 -13   3    3.45    2.63   0
  29  -9   4    3.83    2.50   0
  29  -7   5    5.17    2.65   0
  29  -1  13    0.81    3.28   0
  29  -1  14    0.61    4.05   0
  30  -8   5   13.85    2.42   0
  30  -4   8    2.59    2.40   0
  30  -2  12   -0.74    3.15   0
  30  -2  13    1.33    3.83   0
  31 -17   4   11.00    3.11   0
  31 -15   4   14.87    3.11   0
  31 -13   4    4.87    2.01   0
  31  -5   8    6.31    2.60   0
  31  -3  12    3.37    3.21   0
  32 -16   5    2.07    3.11   0
  32 -14   5    0.85    3.11   0
  32 -12   5    1.97    2.73   0
  32 -10   6    3.30    2.57   0
  32  -8   7    2.85    2.89   0
  32  -4  12    1.28    3.41   0
  33 -13   6    7.09    2.82   0
  33 -11   6    1.63    2.17   0
  33  -9   7    7.84    2.75   0
  33  -7   9    2.55    3.02   0
  34 -12   7    4.33    3.44   0
  34 -10   8   -0.48    3.14   0
  34  -8   9    8.66    3.00   0
  35  -9  10    3.30    3.56   0
 -46  -6   5    1.35    3.50   0
 -46  -4   6   -0.05    3.59   0
 -45  -7   4   -1.21    3.66   0
 -45  -5   5    0.83    3.29   0
 -44  -4   5    2.81    3.32   0
 -44   0   8    0.15    2.91   0
 -44   2  10    1.56    3.50   0
 -43  -5   4    7.24    3.05   0
 -43  -3   5    4.96    2.70   0
 -43   1   8   12.32    2.97   0
 -42 -10   2    3.71    3.52   0
 -42  -4   4    0.80    2.67   0
 -42   0   7    3.43    2.18   0
 -42   2   9    2.40    2.39   0
 -41  -9   2   16.87    3.16   0
 -41   1   7    7.88    2.78   0
 -40 -12   1    2.72    3.84   0
 -40   0   6    0.87    2.09   0
 -40   4  10    0.54    3.23   0
 -39   1   6    2.12    2.66   0
 -39   3   8    1.19    2.75   0
 -39   5  11    2.09    3.20   0
 -38   0   5    5.15    2.63   0
 -38   4   9    6.81    2.95   0
 -38   6  13    4.94    2.74   0
 -37 -13   0    2.20    3.70   0
 -37  -1   4    9.83    1.90   0
 -37   3   7   14.83    2.55   0
 -37   5  10   -1.11    2.47   0
 -36 -10   0    2.21    3.30   0
 -36  -2   3   22.40    2.60   0
 -36   2   6   68.19    2.15   0
 -36   4   8   10.81    2.37   0
 -36   6  11    1.84    2.88   0
 -35  -9   0   11.37    2.85   0
 -35  -3   2   24.22    2.33   0
 -35   5   9    4.74    1.91   0
 -35   7  13    2.48    2.41   0
 -34  -8   0    2.18    2.54   0
 -34   2   5   17.33    2.44   0
 -34   4   7   12.61    2.45   0
 -34   6  10   19.91    1.98   0
 -33  -7   0    4.19    2.51   0
 -33   1   4   10.91    2.23   0
 -33   5   8   10.10    1.83   0
 -33   7  11   15.16    2.98   0
 -32 -10  -1    4.03    2.92   0
 -32  -6   0    1.80    2.70   0
 -32   0   3   61.09    2.52   0
 -32   6   9   21.10    1.90   0
 -32   8  13   -1.56    3.16   0
 -31  -9  -1    4.80    2.90   0
 -31  -3   1    1.15    2.26   0
 -31  -1   2   21.55    2.45   0
 -31   3   5   -2.38    2.07   0
 -31   5   7    5.04    2.35   0
 -31   7  10    4.93    2.52   0
 -30  -8  -1   15.56    2.80   0
 -30   6   8   28.57    2.32   0
 -30   8  12    5.93    2.21   0
 -29 -13  -2    5.15    3.59   0
 -29   7   9   18.48    2.39   0
 -29   9  14    2.49    3.14   0
 -29   9  15   18.86    3.10   0
 -28   0   2    9.33    1.53   0
 -28   4   5   21.02    2.25   0
 -27   9  13   17.91    2.78   0
 -26   8  10    6.58    1.67   0
 -25   1   2   33.86    1.76   0
 -25   9  12    0.58    2.03   0
 -24  -2   0    5.45    2.06   0
 -24   4   4   10.98    2.11   0
 -24   6   6   29.39    2.23   0
 -24   8   9   82.39    2.67   0
 -24  10  16    7.28    3.53   0
 -23  -7  -2   16.95    2.82   0
 -23   3   3    6.28    2.06   0
 -23   9  11    8.73    2.36   0
 -22   2   2   41.61    2.30   0
 -22  10  14   12.59    3.01   0
 -21  -1   0   17.27    2.19   0
 -21   9  10   53.21    2.67   0
 -20   8   8   28.25    2.37   0
 -20  10  13    0.69    2.38   0
 -19  -9  -3   30.53    3.95   0
 -19   1   1  103.97    2.35   0
 -19   9  10   46.08    1.95   0
 -18   4   3    3.28    2.16   0
 -18   6   5    3.15    2.03   0
 -18  10  12    3.15    2.48   0
 -17   7   6    5.99    2.07   0
 -16 -22  -3    0.31    4.19   0
 -16  -2  -1   53.37    2.56   0
 -16   0   0  413.25    4.46   0
 -16  10  12   25.01    1.90   0
 -15   3   2   74.82    2.24   0
 -15   7   6   53.38    1.82   0
 -15   9   9    1.28    2.29   0
 -14  10  11   -1.98    2.18   0
 -13 -23  -3    4.99    3.84   0
 -13   9   9   31.56    2.19   0
 -12 -16  -4   11.81    3.20   0
 -12   2   1   17.54    2.28   0
 -12   8   7   48.25    2.33   0
 -12  10  11   36.00    2.60   0
 -11 -17  -4   12.07    3.17   0
 -10 -18  -4    2.98    3.00   0
 -10   2   1    6.19    1.77   0
 -10   8   7   33.20    2.37   0
 -10  10  11    9.62    2.32   0
  -8 -18  -4    4.04    2.93   0
  -8 -12  -4   39.52    3.16   0
  -8   8   7   76.62    2.71   0
  -8  10  11   32.19    2.70   0
  -7   9   9   20.49    2.27   0
  -6 -24  -3   18.14    3.58   0
  -6 -18  -4    5.30    2.91   0
  -6 -12  -4    5.74    2.62   0
  -6   2   1   54.64    2.90   0
  -5   9   9   14.49    2.28   0
  -4 -18  -4    0.69    2.52   0
  -4  10  12   66.88    2.94   0
  -3 -17  -4    2.17    2.58   0
  -3 -13  -4   10.62    2.68   0
  -2 -18  -4    4.42    2.53   0
  -2 -16  -4    2.23    2.47   0
  -2 -14  -4   76.10    3.10   0
  -2  10  13   30.37    2.73   0
  -1 -23  -3    1.35    2.89   0
  -1 -15  -4   45.25    2.53   0
  -1 -13  -4   10.21    2.31   0
  -1   3   2   17.42    3.18   0
  -1   9  10   13.72    2.38   0
   0 -14  -4    7.57    2.39   0
   0   6   5  221.10    4.56   0
   0   8   8  188.58    3.67   0
   0  10  14    1.69    2.97   0
   0  10  15   29.28    3.04   0
   0  10  16    4.56    3.09   0
   0  10  17    1.85    3.85   0
   1 -23  -3    1.31    2.80   0
   2 -22  -3   13.32    3.23   0
   3   7   7    0.08    2.51   0
   4 -22  -3    2.10    2.71   0
   5 -25  -2    5.23    3.63   0
   5 -21  -3   12.89    2.78   0
   5  -9  -3  155.04    2.80   0
   5  -3  -1  313.73    5.20   0
   5  -1   0   51.92    3.68   0
   5   9  13   11.15    3.33   0
   5   9  18    5.37    4.60   0
   6 -20  -3   13.12    2.57   0
   6 -10  -3    5.40    2.17   0
   6  -6  -2  328.69    4.25   0
   6   8  10   84.84    4.04   0
   7 -19  -3    5.13    2.31   0
   7 -11  -3  141.38    2.99   0
   8 -24  -2    2.12    2.46   0
   8 -18  -3   17.46    2.52   0
   8  -4  -1   30.54    2.54   0
   9 -23  -2    9.29    3.15   0
   9 -17  -3    7.21    2.35   0
   9 -15  -3   16.55    2.40   0
   9 -13  -3   46.95    2.29   0
  10 -22  -2   11.65    2.74   0
  10  -8  -2  100.69    2.85   0
  10   8  17   10.63    5.55   0
  11  -9  -2   65.17    2.41   0
  11  -3   0  121.04    3.08   0
  12 -24  -1   17.89    3.31   0
  13 -19  -2   10.91    2.40   0
  14 -18  -2   19.45    2.64   0
  14 -12  -2    7.04    2.05   0
  15 -17  -2    1.45    1.80   0
  15 -15  -2    8.96    2.04   0
  15  -5   0   69.96    2.12   0
  15  -3   1   10.22    2.35   0
  16  -6   0  139.08    2.93   0
  17   3   7   81.93    3.58   0
  18 -12  -1   14.57    2.27   0
  19 -15  -1   23.16    1.70   0
  20 -10   0    5.89    2.21   0
  21 -19   0   19.59    2.85   0
  21 -11   0    1.52    1.55   0
  21  -5   2   34.05    2.20   0
  22 -22   1    1.60    3.07   0
  22 -16   0   58.85    2.07   0
  22 -14   0   17.71    1.77   0
  22  -6   2  130.98    2.66   0
  22  -4   3   19.21    2.11   0
  23 -21   1    4.51    2.53   0
  23  -7   2   13.71    2.31   0
  23  -5   3   30.29    2.17   0
  24 -18   1   15.84    2.85   0
  24 -16   1    9.08    2.32   0
  24 -14   1   12.09    2.18   0
  24 -12   1    2.31    2.14   0
  24  -8   2    2.78    2.11   0
  24  -6   3   22.03    2.25   0
  24  -4   4    0.40    2.09   0
  24   0   8    0.48    2.69   0
  24   2  13   10.28    3.69   0
  24   2  16   -0.90    4.97   0
  25 -21   2    0.16    3.11   0
  25  -7   3    8.06    2.33   0
  25  -5   4   21.37    2.22   0
  25   1  11    8.02    3.02   0
  26 -18   2   -0.54    2.79   0
  26 -12   2    6.90    2.26   0
  26  -8   3   36.03    2.35   0
  26  -6   4   13.08    2.33   0
  26   0  10   28.10    2.78   0
  27 -15   2   31.49    1.97   0
  27  -7   4   17.85    2.42   0
  27  -5   5   13.15    1.79   0
  28 -18   3   11.47    3.12   0
  28 -12   3   -0.51    2.37   0
  28  -8   4    5.71    1.75   0
  28  -2   9   29.32    2.79   0
  29 -11   4    8.27    2.42   0
  29  -5   7   23.20    2.38   0
  30 -18   4    5.94    3.08   0
  30 -16   4    0.95    3.20   0
  30 -14   4    3.21    3.00   0
  30 -12   4    8.10    2.01   0
  30 -10   5    0.85    2.54   0
  30  -6   7    7.76    2.63   0
  30  -4   9    4.75    2.62   0
  30  -2  14    1.59    3.63   0
  31 -17   5    6.94    3.19   0
  31 -13   5    2.70    2.60   0
  31 -11   5    8.99    2.13   0
  31  -9   6    1.18    2.69   0
  31  -7   7   35.16    2.84   0
  31  -5   9    2.13    2.75   0
  31  -3  13    0.15    3.35   0
  32 -12   6    2.25    2.69   0
  32  -6   9   10.92    2.79   0
  32  -4  13   15.19    3.68   0
  33 -15   6    4.67    2.41   0
  33 -11   7    2.41    3.17   0
  33  -9   8    1.35    3.04   0
  33  -7  10    4.58    2.95   0
  34 -14   7    3.49    2.68   0
  34 -12   8   -1.21    3.39   0
  34 -10   9    7.37    3.14   0
  34  -8  10   -1.08    3.08   0
 -45  -1   7   -0.73    3.36   0
 -45   1   9   -1.69    3.44   0
 -44  -8   3    1.80    3.09   0
 -44  -2   6    1.70    2.34   0
 -43 -11   2    6.47    3.66   0
 -43  -7   3    0.26    3.20   0
 -43  -1   6    2.34    3.06   0
 -43   3  10    9.86    3.57   0
 -42  -6   3    5.62    3.02   0
 -42  -2   5    2.41    2.78   0
 -42   2   8    9.85    3.21   0
 -42   4  11    4.26    3.24   0
 -41 -13   1    1.33    4.06   0
 -41  -5   3    5.17    2.86   0
 -41  -3   4    2.63    2.66   0
 -41  -1   5   11.30    2.74   0
 -41   3   9   16.30    2.50   0
 -40  -4   3    3.48    2.79   0
 -40   2   7    2.84    2.96   0
 -39  -9   1    2.22    2.98   0
 -39   5  10    3.85    2.78   0
 -38 -14   0    3.28    4.30   0
 -38  -8   1   17.63    2.88   0
 -38   2   6    8.96    2.53   0
 -38   6  12    5.61    2.49   0
 -37 -11   0    2.02    3.39   0
 -37  -7   1    3.90    2.68   0
 -37   1   5   20.33    2.60   0
 -37   5   9   32.37    2.74   0
 -37   7  13    4.81    3.53   0
 -36  -6   1   11.97    2.61   0
 -36   0   4    2.26    1.90   0
 -36   6  10    1.78    2.70   0
 -35  -5   1   12.93    2.62   0
 -35  -1   3   18.33    2.35   0
 -35   3   6   -0.83    2.20   0
 -35   5   8   10.27    2.49   0
 -35   7  12   -0.00    2.34   0
 -34 -16  -1    4.98    4.47   0
 -34 -14  -1    3.01    3.64   0
 -34  -2   2   55.40    2.66   0
 -34   6   9   -0.22    2.44   0
 -34   8  13    9.33    3.10   0
 -34   8  14    3.78    2.57   0
 -33 -11  -1    5.38    3.09   0
 -33   7  10   21.53    2.47   0
 -32   2   4   42.03    2.43   0
 -32   4   6    0.81    1.56   0
 -32   6   8   24.01    2.37   0
 -32   8  12    8.31    2.90   0
 -31  -5   0    2.22    2.22   0
 -31   1   3   33.38    2.45   0
 -31   9  14    7.50    2.98   0
 -31   9  15    0.74    3.23   0
 -30  -2   1    9.19    2.29   0
 -30   8  11    9.21    2.03   0
 -29  -7  -1   29.12    2.57   0
 -29   3   4   13.20    2.20   0
 -29   5   6   46.22    2.29   0
 -29   9  13    8.11    2.73   0
 -28  -6  -1   17.88    2.72   0
 -28   2   3   56.87    2.50   0
 -28   6   7    6.46    1.76   0
 -28   8  10    8.99    2.37   0
 -27  -1   1  291.46    3.14   0
 -27   1   2   31.56    2.11   0
 -27   7   8    1.44    1.68   0
 -27   9  12   20.65    2.25   0
 -26   8   9    6.01    2.30   0
 -26  10  14   11.35    2.86   0
 -26  10  15    3.44    3.31   0
 -26  10  16    5.26    3.25   0
 -25   5   5    7.26    1.65   0
 -25   9  11    9.29    2.45   0
 -24  -4  -1   83.54    2.87   0
 -24   0   1   40.84    1.85   0
 -24  10  13   19.06    2.63   0
 -24  10  14    6.71    2.30   0
 -23   7   7   12.70    1.62   0
 -23   9  10    6.59    2.48   0
 -22  10  12    1.80    2.43   0
 -22  10  13   12.51    2.01   0
 -21  -3  -1  142.45    3.11   0
 -21   1   1   51.10    2.43   0
 -20   4   3   21.36    2.13   0
 -20   6   5   37.90    2.22   0
 -20  10  12   11.89    2.37   0
 -19  -5  -2    1.06    2.44   0
 -19   5   4    1.20    1.47   0
 -19   7   6    9.18    2.11   0
 -19   9   9   48.59    2.43   0
 -19  11  16    2.99    3.00   0
 -19  11  17    2.38    3.24   0
 -18  10  11    8.15    2.55   0
 -17   3   2    3.49    1.59   0
 -17  11  15   10.49    2.86   0
 -17  11  16    1.29    3.15   0
 -17  11  17    8.12    3.63   0
 -16   8   7    3.40    2.13   0
 -16  10  11   98.31    2.95   0
 -15  11  15    4.45    3.03   0
 -15  11  16   16.80    3.35   0
 -15  11  17   12.52    3.51   0
 -14   2   1   58.16    2.55   0
 -14   8   7   43.58    1.78   0
 -13  11  14   22.05    2.71   0
 -13  11  15    7.94    3.04   0
 -13  11  16    1.16    2.92   0
 -13  11  17    1.87    3.46   0
 -11 -23  -3    9.53    3.85   0
 -11 -15  -4   14.74    3.11   0
 -11  11  14    8.54    2.62   0
 -11  11  17   16.93    3.47   0
 -10 -16  -4    3.19    3.06   0
  -9 -23  -3    2.26    3.45   0
  -9 -17  -4  108.42    3.75   0
  -9 -13  -4   17.15    2.91   0
  -9  11  15    0.98    2.95   0
  -9  11  16    0.90    3.10   0
  -9  11  17    4.98    3.46   0
  -9  11  18    3.00    3.91   0
  -8 -16  -4    6.26    2.87   0
  -7 -23  -3    7.90    3.41   0
  -7 -17  -4   12.65    2.58   0
  -7 -13  -4   32.04    3.07   0
  -7  11  16   11.08    3.37   0
  -7  11  17    0.32    3.49   0
  -6 -16  -4   22.24    2.89   0
  -6 -14  -4   50.90    3.13   0
  -6   8   7   25.19    2.24   0
  -6  10  11    2.61    2.30   0
  -5 -23  -3    3.62    3.17   0
  -5 -17  -4   53.32    2.86   0
  -5 -15  -4    8.14    2.70   0
  -5 -13  -4   45.94    2.70   0
  -4 -16  -4    4.06    2.38   0
  -4 -14  -4   66.83    2.87   0
  -4   8   7   25.99    2.24   0
  -3 -15  -4   14.63    2.40   0
  -3  -7  -3   22.00    2.91   0
  -3   9   9    9.16    2.29   0
  -2  10  12    3.49    2.78   0
  -1   7   6   36.36    2.57   0
   0  10  13    2.86    2.92   0
   0  10  18    2.55    3.68   0
   1 -25  -2   -0.21    3.68   0
   1   9  10   19.93    2.78   0
   3 -25  -2    0.96    3.27   0
   3 -21  -3   25.21    2.80   0
   3  -5  -2   41.40    2.21   0
   3   9  11   15.65    3.16   0
   4 -20  -3   -0.45    2.52   0
   4   8   9    3.14    2.59   0
   6 -24  -2    2.67    3.02   0
   7 -23  -2    6.41    3.09   0
   7 -17  -3   42.63    2.48   0
   8 -16  -3    1.39    2.45   0
   8 -14  -3  179.70    3.12   0
   8  -2   0  619.47    6.16   0
   8   8  11   61.86    4.49   0
   9 -25  -1   -0.92    3.45   0
  11 -21  -2   13.14    2.20   0
  12 -20  -2   11.93    1.92   0
  12 -10  -2   18.65    1.60   0
  13 -23  -1    1.66    2.90   0
  13 -17  -2   92.68    2.85   0
  13 -13  -2    2.73    2.09   0
  13  -7  -1    0.94    1.99   0
  14 -22  -1    2.19    3.07   0
  14 -16  -2   27.25    1.84   0
  14 -14  -2    8.94    1.63   0
  14  -8  -1   38.71    2.35   0
  15 -21  -1   12.93    2.78   0
  15  -9  -1   32.26    2.22   0
  15   3   6    9.96    2.63   0
  16 -24   0    4.38    2.69   0
  16 -20  -1   13.04    2.64   0
  16 -10  -1   12.58    2.07   0
  16  -2   2   28.77    1.93   0
  16   4   8    8.98    3.03   0
  17 -23   0    5.12    3.10   0
  17 -19  -1    9.49    2.06   0
  17 -17  -1   15.33    2.47   0
  17 -13  -1   -0.37    2.04   0
  17  -7   0   76.53    2.04   0
  18 -22   0    9.77    2.86   0
  18 -16  -1   13.48    1.68   0
  18 -14  -1   35.06    1.89   0
  18  -8   0   42.39    1.78   0
  19 -21   0    8.83    2.20   0
  19  -9   0    3.64    1.49   0
  20 -18   0   -0.35    2.76   0
  20 -12   0   -0.40    2.07   0
  20   4  13    4.62    4.11   0
  21 -21   1    1.71    2.88   0
  21 -17   0    4.73    1.79   0
  21 -15   0   38.10    2.36   0
  21 -13   0    5.76    1.60   0
  21   1   7  132.15    3.25   0
  22 -20   1   10.18    3.05   0
  22 -10   1   67.53    2.62   0
  23 -19   1   -0.09    2.09   0
  23 -17   1    1.18    2.56   0
  23 -13   1   12.64    2.29   0
  23 -11   1    1.40    1.54   0
  24 -20   2   17.33    2.95   0
  24   2  14    1.48    3.56   0
  24   2  15    6.06    4.36   0
  25 -19   2   12.58    2.85   0
  25 -11   2   14.59    2.23   0
  25   1  12    6.53    3.23   0
  26 -20   3    0.83    3.07   0
  26 -16   2    1.21    1.83   0
  26 -14   2   19.45    1.79   0
  26   0  11   10.62    3.21   0
  27 -19   3   23.66    3.03   0
  27 -11   3    4.45    2.16   0
  27  -1  10   27.31    2.98   0
  28 -16   3    7.28    1.99   0
  28 -14   3    1.01    1.80   0
  28 -10   4   21.78    2.56   0
  28  -2  10   13.92    2.99   0
  29 -19   4    7.31    2.63   0
  29 -17   4    0.69    3.16   0
  29 -15   4    3.59    2.61   0
  29 -13   4    4.70    2.77   0
  29  -9   5    4.23    2.58   0
  29  -7   6    7.29    2.56   0
  30 -18   5   -1.05    3.21   0
  30 -12   5    8.60    2.64   0
  30  -8   6    1.15    2.42   0
  31 -15   5    6.41    2.33   0
  31 -11   6   -3.37    2.62   0
  31  -7   8    3.18    2.62   0
  31  -5  10    5.47    2.96   0
  32 -16   6   -1.11    3.19   0
  32 -14   6   -2.27    2.93   0
  32 -10   7    2.32    2.88   0
  32  -8   8    2.52    2.65   0
  32  -6  10    7.69    3.09   0
  33 -15   7    2.34    3.45   0
  33 -13   7    4.77    2.95   0
  33 -11   8    7.96    3.28   0
  33  -9   9    3.20    3.20   0
  33  -7  11    4.50    3.53   0
  34 -10  10    5.82    3.62   0
 -44   0   7    2.54    2.90   0
 -44   2   9    3.85    2.50   0
 -43   1   7   -0.05    2.70   0
 -43   3   9   -0.05    3.17   0
 -42  -8   2    0.65    2.91   0
 -42   0   6    2.58    2.60   0
 -42   4  10    7.75    3.53   0
 -41  -7   2   18.22    3.10   0
 -41   1   6   31.71    2.82   0
 -41   3   8    2.57    3.04   0
 -41   5  11   -0.19    3.11   0
 -40 -10   1    2.44    3.20   0
 -40  -6   2    8.01    2.97   0
 -40   0   5    1.35    2.65   0
 -40   4   9    0.61    2.39   0
 -40   6  12    1.09    3.60   0
 -39  -5   2    1.66    2.73   0
 -39  -3   3   11.17    2.02   0
 -39  -1   4   31.20    2.63   0
 -39   3   7    7.04    2.85   0
 -38 -12   0    1.51    3.61   0
 -38  -4   2   25.32    2.61   0
 -38  -2   3    2.98    2.41   0
 -38   4   8    9.04    2.15   0
 -38   6  11    4.70    2.35   0
 -37   7  12    7.11    3.39   0
 -36   2   5   16.70    2.60   0
 -36   4   7    3.87    2.39   0
 -35   1   4    4.53    2.31   0
 -35   7  11   13.45    2.23   0
 -34 -12  -1    2.92    3.27   0
 -34  -4   1    9.18    2.35   0
 -34   0   3   51.60    2.41   0
 -34   4   6    1.81    2.35   0
 -34   8  12   14.75    3.36   0
 -33  -3   1   35.65    2.39   0
 -33  -1   2    6.21    2.41   0
 -33   3   5    5.51    1.70   0
 -33   5   7   -0.58    1.67   0
 -33   9  14    0.27    3.09   0
 -32   8  11   32.89    2.97   0
 -31   5   6   14.43    2.32   0
 -31   7   9   16.96    1.75   0
 -31   9  13    7.79    3.16   0
 -30 -14  -2   21.98    4.45   0
 -30  -4   0   29.81    2.31   0
 -30   0   2    6.69    1.67   0
 -30   4   5   33.57    1.78   0
 -30   6   7   10.66    2.32   0
 -30   8  10   35.46    2.64   0
 -29   7   8    6.01    2.33   0
 -29   9  12   17.92    2.76   0
 -28 -10  -2    1.10    3.00   0
 -28   8   9   33.03    2.47   0
 -28  10  14   13.78    2.91   0
 -28  10  15   11.88    3.42   0
 -27  -9  -2    8.27    3.09   0
 -27  -5  -1   54.99    2.87   0
 -27   5   5   11.97    2.33   0
 -27   9  11   22.05    2.62   0
 -26  -2   0   33.27    2.32   0
 -26   0   1    0.06    1.87   0
 -26   4   4   25.36    1.84   0
 -26   6   6    1.91    1.54   0
 -26  10  13    8.91    2.88   0
 -25   3   3   48.37    1.83   0
 -25   9  10   81.22    2.76   0
 -24   2   2  257.48    3.34   0
 -24   8   8   19.57    2.29   0
 -24  10  12    9.77    2.65   0
 -23  -1   0   51.81    2.45   0
 -22  -6  -2  130.30    3.39   0
 -22   6   5    8.86    2.19   0
 -21   5   4    9.33    1.49   0
 -21   7   6   21.47    2.29   0
 -21  11  15    1.95    3.17   0
 -21  11  16    4.69    3.32   0
 -20   8   7   10.60    2.12   0
 -20  10  11    9.86    2.65   0
 -19   3   2  108.79    2.80   0
 -19  11  14    1.64    2.90   0
 -19  11  15   14.19    2.83   0
 -18  -2  -1  109.77    3.00   0
 -18   0   0  105.00    2.88   0
 -18   8   7   24.82    1.84   0
 -17 -21  -3    1.72    3.77   0
 -16   2   1  147.03    3.18   0
 -16  10  10    5.18    2.31   0
 -15   9   8   58.71    2.50   0
 -15  11  13   20.23    2.82   0
 -15  11  14    3.72    2.04   0
 -14 -22  -3    1.02    3.75   0
 -14  10  10   25.39    2.52   0
 -13   9   8   47.60    2.33   0
 -13  11  13   29.50    2.86   0
 -12 -22  -3   13.72    3.74   0
 -12   6   4   43.55    2.45   0
 -12  10  10   26.79    2.55   0
 -11   9   8   38.50    2.31   0
 -11  11  13   17.72    2.75   0
 -10   6   4  279.20    3.66   0
  -9 -15  -4   84.96    3.31   0
  -9   9   8    9.73    2.22   0
  -9  11  14    3.74    2.47   0
  -8 -14  -4    5.75    2.40   0
  -8  10  10   90.33    2.64   0
  -7 -15  -4   22.41    2.59   0
  -7  11  14    3.57    2.77   0
  -7  11  15   13.81    2.93   0
  -7  11  18    0.32    3.76   0
  -5  11  15    0.93    3.10   0
  -5  11  16    1.12    3.16   0
  -5  11  17    9.41    3.72   0
  -4 -22  -3    1.04    3.21   0
  -4  10  11    3.38    2.38   0
  -2 -22  -3    6.88    2.98   0
  -2  -4  -2  589.25    9.21   0
  -1 -25  -2    2.09    3.63   0
   1 -21  -3   -0.54    2.74   0
   2 -24  -2    3.67    3.43   0
   2   8   8  219.01    4.32   0
   2  10  14   18.57    3.20   0
   2  10  15    3.03    3.38   0
   2  10  16    0.03    3.51   0
   2  10  17    5.19    3.88   0
   4 -24  -2    8.73    3.06   0
   4 -10  -3   37.23    2.50   0
   5 -23  -2    3.76    2.87   0
   5 -11  -3   72.92    2.64   0
   5   9  12   85.57    3.96   0
   6 -18  -3   11.61    2.34   0
   6 -16  -3    7.50    2.35   0
   6 -12  -3    1.54    2.07   0
   7 -25  -1    4.52    3.18   0
   7 -13  -3  129.97    2.33   0
   7   9  15    2.62    3.77   0
   7   9  16    1.55    4.00   0
   8 -22  -2    5.78    2.71   0
   9 -21  -2    4.08    2.88   0
   9  -5  -1  711.15    5.48   0
   9   7   9    6.90    4.20   0
  10 -24  -1    3.07    2.95   0
  10 -20  -2   12.04    2.52   0
  10   8  13    8.73    4.49   0
  11 -23  -1    6.50    3.06   0
  11 -19  -2    5.77    2.55   0
  11 -11  -2   75.22    2.44   0
  12 -22  -1   15.22    2.82   0
  12 -18  -2    5.02    1.98   0
  12 -16  -2   18.23    2.32   0
  12 -12  -2   16.22    2.09   0
  12  -4   0  144.91    2.64   0
  12  -2   1  234.64    3.87   0
  13 -15  -2   81.23    2.09   0
  14 -24   0    3.49    3.32   0
  15 -23   0   11.59    3.48   0
  15 -19  -1    1.15    2.71   0
  15   1   4   67.79    2.80   0
  16 -22   0   12.87    2.82   0
  16 -18  -1    7.67    2.35   0
  16 -12  -1   11.13    2.24   0
  17 -21   0    7.50    2.64   0
  17 -15  -1   10.99    1.69   0
  17  -5   1  122.45    2.84   0
  17  -3   2    1.36    2.23   0
  17   1   5    3.68    2.42   0
  18 -20   0   -0.02    2.83   0
  18  -6   1    7.86    2.11   0
  18  -2   3   11.53    2.29   0
  19 -19   0   14.63    2.66   0
  19 -11   0   45.69    2.36   0
  19  -7   1  194.30    3.03   0
  19   1   6   12.32    2.27   0
  20 -22   1    7.49    2.34   0
  20 -16   0   -2.09    2.23   0
  20 -14   0   -0.74    2.18   0
  20  -8   1  177.65    2.96   0
  20   4  16    0.79    4.72   0
  21  -9   1   13.92    1.73   0
  21   3  11    6.04    3.13   0
  22 -18   1    8.05    2.67   0
  22 -12   1   21.36    2.36   0
  22  -2   5   27.09    2.25   0
  22   2  10    7.12    2.94   0
  23 -21   2    2.48    3.03   0
  23 -15   1    4.39    1.74   0
  23  -9   2   20.72    2.22   0
  23   1   9    1.02    2.44   0
  24 -18   2   15.09    2.55   0
  24 -10   2    5.80    1.56   0
  25 -21   3   -1.20    3.15   0
  25 -17   2    8.68    2.00   0
  25 -15   2   10.24    2.39   0
  25 -13   2    7.37    1.72   0
  25  -3   6   18.19    2.36   0
  25  -1   8    5.26    2.32   0
  25   1  13   -1.04    3.50   0
  26 -18   3    4.49    2.71   0
  26 -10   3    3.08    1.66   0
  26  -4   6   27.11    2.45   0
  27 -17   3    1.59    1.94   0
  27 -15   3    2.40    2.46   0
  27 -13   3   15.35    1.86   0
  27  -7   5   12.95    2.26   0
  27  -5   6    2.00    2.38   0
  27  -1  11   21.53    3.31   0
  28 -18   4    0.26    3.19   0
  28 -16   4    8.48    2.76   0
  28 -12   4   10.00    2.68   0
  28  -8   5   14.07    2.38   0
  28  -6   6   24.71    2.42   0
  28  -4   8   11.30    2.35   0
  29 -11   5   -1.57    2.38   0
  29  -5   8   33.64    2.96   0
  30 -16   5    8.91    2.95   0
  30 -14   5   27.96    2.92   0
  30 -10   6    5.43    2.61   0
  30  -8   7    4.56    2.37   0
  30  -6   8    3.72    2.78   0
  31 -17   6    3.25    3.27   0
  31 -15   6    3.68    3.23   0
  31 -13   6   -1.73    2.92   0
  31  -9   7    4.44    2.43   0
  31  -5  11    3.75    3.11   0
  32 -14   7    8.02    3.24   0
  32 -12   7    2.34    2.75   0
  32 -10   8   -1.60    3.08   0
  32  -8   9    5.53    3.07   0
  32  -6  11    0.90    3.22   0
  32  -6  12    2.70    3.23   0
  33 -13   8    0.80    3.44   0
  33 -11   9   -0.73    3.07   0
  33  -9  10   11.52    3.51   0
 -46  -6   4    4.28    3.63   0
 -46  -4   5    4.96    3.02   0
 -46  -2   6    6.01    3.54   0
 -45  -5   4    8.21    3.34   0
 -45  -3   5    1.40    3.03   0
 -45  -1   6    7.76    3.09   0
 -45   1   8    2.29    2.50   0
 -44  -4   4    0.73    3.10   0
 -44   2   8    8.19    3.18   0
 -43  -9   2    9.24    3.50   0
 -43  -3   4   14.93    3.12   0
 -42   2   7    5.82    2.99   0
 -42   4   9    3.76    2.97   0
 -41 -11   1    8.89    3.34   0
 -41   5  10   -0.46    3.40   0
 -40   2   6    1.11    2.60   0
 -40   4   8   11.86    2.91   0
 -40   6  11   17.16    3.33   0
 -39   1   5   17.94    2.59   0
 -39   5   9    1.94    2.74   0
 -39   7  12    0.84    3.18   0
 -38   0   4    1.97    2.40   0
 -38   4   7    8.09    2.64   0
 -38   6  10   12.22    2.81   0
 -37  -9   0    4.11    3.28   0
 -37  -3   2    0.79    2.58   0
 -37  -1   3    6.56    2.49   0
 -37   3   6   14.28    1.94   0
 -37   5   8    2.32    2.37   0
 -37   7  11   21.24    3.11   0
 -36  -8   0   10.81    2.72   0
 -36   6   9   12.42    2.01   0
 -36   8  13    1.76    2.62   0
 -35 -15  -1    0.35    4.28   0
 -35  -7   0   26.26    2.72   0
 -35   3   5    3.90    2.44   0
 -35   5   7   11.02    2.49   0
 -35   7  10    7.47    2.54   0
 -34  -6   0    3.65    2.52   0
 -34   2   4   39.77    2.55   0
 -34   6   8   17.98    2.42   0
 -34   8  11    1.06    2.94   0
 -33   1   3   22.28    2.43   0
 -33   7   9   33.02    2.47   0
 -33   9  13   13.88    3.34   0
 -32  -8  -1   17.12    3.03   0
 -32  -2   1    2.42    2.26   0
 -32   4   5   31.79    2.44   0
 -32   6   7   -0.87    2.16   0
 -32   8  10    5.71    2.53   0
 -31   3   4   50.66    2.34   0
 -31   7   8   23.03    2.40   0
 -31   9  12    1.86    2.79   0
 -30 -16  -2    4.46    5.52   0
 -30   2   3    4.20    2.11   0
 -30  10  14    1.65    3.00   0
 -29 -11  -2    3.62    3.29   0
 -29  -3   0   64.41    2.53   0
 -29  -1   1   31.19    1.74   0
 -29   1   2   68.05    2.56   0
 -29   9  11    2.61    2.55   0
 -28   4   4   25.39    2.29   0
 -28   6   6  203.08    3.08   0
 -28  10  13    0.65    2.98   0
 -27   3   3   11.37    2.32   0
 -27   7   7   15.02    1.79   0
 -27   9  10    5.88    2.63   0
 -26  -8  -2   11.83    2.54   0
 -26   2   2   29.61    2.12   0
 -26   8   8   20.59    2.33   0
 -26  10  12    3.19    2.81   0
 -25 -21  -2    1.52    6.05   0
 -25  -7  -2   96.35    3.49   0
 -25  11  15    2.42    3.06   0
 -24   6   5   87.11    2.70   0
 -24  10  11   10.16    2.50   0
 -23  -3  -1   25.77    2.29   0
 -23   1   1  190.88    3.05   0
 -23   5   4   10.46    1.53   0
 -23   7   6   40.30    2.42   0
 -23   9   9   27.62    2.28   0
 -23  11  14   15.97    3.17   0
 -23  11  15   13.17    2.95   0
 -23  11  16    1.76    2.69   0
 -22   4   3   12.80    1.56   0
 -22   8   7    5.53    2.15   0
 -21   3   2   18.32    2.22   0
 -21  11  13    6.87    2.64   0
 -21  11  14   18.73    2.82   0
 -20   0   0   20.84    2.35   0
 -20  10  10   37.80    2.47   0
 -19   9   8   23.55    2.31   0
 -19  11  13    6.45    2.80   0
 -18 -20  -3    5.66    4.02   0
 -18   2   1  198.22    3.45   0
 -18  10  10   42.31    2.39   0
 -17   9   8    2.61    2.13   0
 -17  11  12    2.32    2.33   0
 -17  11  13    3.92    1.99   0
 -16  -4  -2  484.97    5.89   0
 -16   6   4   11.15    2.16   0
 -15 -21  -3    9.23    3.85   0
 -15   5   3   17.42    2.24   0
 -15   7   5  243.96    3.21   0
 -15  11  12    4.13    2.54   0
 -14   6   4   24.71    1.70   0
 -13   5   3  415.39    3.78   0
 -13   7   5   21.27    2.12   0
 -13  11  12    9.08    2.50   0
 -11  -1  -1 1489.07   10.01   0
 -11   5   3  133.95    2.61   0
 -11   7   5    7.28    1.53   0
 -11  11  12   13.39    2.53   0
 -10 -22  -3    3.38    3.53   0
  -9  -1  -1   80.70    3.46   0
  -9   5   3  259.92    3.43   0
  -9   7   5   74.33    2.65   0
  -8 -22  -3    0.66    2.99   0
  -8   6   4   40.78    1.95   0
  -7 -25  -2    0.94    4.24   0
  -7   5   3  468.37    4.81   0
  -7   7   5  682.58    5.38   0
  -7   9   8   11.92    1.63   0
  -7  11  13    5.00    2.72   0
  -6 -22  -3   17.08    3.06   0
  -6   6   4  328.15    4.18   0
  -6  10  10   85.15    2.63   0
  -5 -25  -2    0.98    3.75   0
  -5  -7  -3   66.40    3.76   0
  -5   9   8   13.37    2.36   0
  -5  11  14   23.33    3.00   0
  -5  11  18    5.51    3.77   0
  -3 -25  -2    6.81    3.68   0
  -3 -21  -3   20.54    3.20   0
  -3  11  15    3.65    3.27   0
  -3  11  16    3.05    3.37   0
  -3  11  17    4.33    3.99   0
  -2   8   7  117.49    3.20   0
  -2  10  11    5.60    2.40   0
  -1 -21  -3    6.25    2.79   0
  -1   9   9  112.08    3.10   0
   0 -24  -2    0.99    2.97   0
   0 -20  -3    6.02    2.83   0
   0  10  12   55.85    2.88   0
   1  -9  -3   62.48    2.68   0
   2 -20  -3   10.53    2.45   0
   2  10  18    5.05    4.21   0
   3 -23  -2    1.44    2.79   0
   3 -19  -3   22.98    2.56   0
   3   1   1 6095.41   54.90   0
   4  -6  -2  384.06    4.75   0
   5 -25  -1    0.81    3.22   0
   5 -17  -3   49.78    2.63   0
   5 -15  -3   34.02    2.26   0
   6 -22  -2   17.38    2.91   0
   6 -14  -3   -1.27    2.03   0
   7 -21  -2    3.71    2.79   0
   7   7   8   11.15    3.47   0
   7   9  14    4.44    3.80   0
   7   9  17    4.99    4.59   0
   8 -24  -1   10.03    3.34   0
   8 -20  -2   15.97    2.46   0
   8  -8  -2  333.79    3.61   0
   9 -19  -2   21.55    2.43   0
   9  -9  -2    8.71    2.12   0
  10 -18  -2    4.11    2.62   0
  10 -10  -2   63.56    1.97   0
  10  -6  -1  127.86    3.15   0
  11 -17  -2   11.33    2.42   0
  11 -15  -2   10.21    2.21   0
  11 -13  -2  135.16    2.82   0
  12 -24   0    3.22    3.08   0
  12 -14  -2    4.91    1.59   0
  13 -21  -1    9.85    2.00   0
  13  -5   0   16.34    2.28   0
  13   5   8    9.84    3.86   0
  14 -20  -1    5.26    1.96   0
  14 -10  -1   24.30    2.20   0
  14   4   7   18.50    3.16   0
  15 -17  -1   35.66    2.53   0
  15 -11  -1   40.08    2.20   0
  16 -16  -1   55.14    1.97   0
  16 -14  -1   58.04    1.96   0
  17 -23   1    1.81    3.36   0
  17  -9   0   81.36    2.49   0
  18 -22   1    3.51    3.12   0
  18 -18   0   33.16    2.77   0
  18 -10   0   18.36    1.65   0
  18  -4   2   77.22    2.54   0
  18   4  10   13.65    3.33   0
  19 -21   1    6.61    3.15   0
  19 -17   0    3.45    1.84   0
  19 -15   0   62.45    2.63   0
  19 -13   0   50.25    2.31   0
  19  -5   2    1.71    2.09   0
  19  -3   3   85.40    2.64   0
  19   3   9   14.94    2.93   0
  20 -20   1    3.55    3.02   0
  20  -6   2   24.20    2.21   0
  20  -2   4  210.58    2.95   0
  20   4  14    6.73    3.77   0
  20   4  15    4.94    4.52   0
  21 -19   1   13.02    2.11   0
  21 -17   1   11.52    2.38   0
  21 -11   1    2.18    2.21   0
  21  -7   2   27.91    2.17   0
  21  -3   4   28.77    2.23   0
  22 -20   2    1.37    2.92   0
  22 -16   1   34.31    1.83   0
  22 -14   1   67.12    2.01   0
  22  -8   2   54.39    1.94   0
  22   0   7   55.08    2.68   0
  23 -19   2    4.69    2.89   0
  23  -7   3   36.45    2.36   0
  23  -3   5   47.27    2.43   0
  24 -20   3    9.10    3.05   0
  24 -16   2    8.90    2.35   0
  24 -14   2   24.85    2.37   0
  24 -12   2    7.49    1.62   0
  24  -8   3   11.47    2.28   0
  24  -6   4   37.09    2.31   0
  24  -4   5   33.23    2.33   0
  24   0   9   12.42    2.43   0
  25 -19   3   -1.72    3.10   0
  25  -5   5   47.31    2.57   0
  25   1  14    1.91    3.87   0
  25   1  15    5.27    4.06   0
  26 -20   4   17.51    3.52   0
  26 -16   3    1.94    2.33   0
  26 -14   3    5.20    2.40   0
  26 -12   3   13.88    1.78   0
  26  -8   4   18.99    1.79   0
  26  -6   5   70.95    2.61   0
  26   0  12    1.06    2.88   0
  26   0  13    2.83    3.44   0
  27 -19   4    2.83    2.51   0
  27 -17   4    2.84    2.67   0
  27 -11   4    4.48    2.47   0
  27  -1  12    1.71    3.13   0
  28 -14   4    6.63    2.11   0
  28 -10   5   17.60    2.48   0
  28  -2  11    5.43    2.89   0
  29 -17   5   -0.58    2.93   0
  29 -15   5   -0.60    2.91   0
  29 -13   5    5.92    2.81   0
  29  -9   6    9.28    2.56   0
  29  -7   7    4.34    2.48   0
  29  -3  11    0.87    2.85   0
  30 -16   6    8.46    3.35   0
  30 -14   6    2.58    2.87   0
  30 -12   6   12.46    2.85   0
  30  -6   9   13.34    2.70   0
  30  -4  12   -0.34    3.01   0
  31 -13   7    0.84    2.79   0
  31 -11   7   -0.11    2.83   0
  31  -9   8   26.61    3.14   0
  31  -7   9    0.04    2.64   0
  32 -14   8    1.00    3.33   0
  32 -12   8    1.33    3.29   0
  32 -10   9   12.62    2.92   0
  32  -8  10    5.55    3.26   0
  33 -11  10    3.71    3.55   0
  33  -9  11   -2.03    3.58   0
 -46   0   7    8.39    3.17   0
 -45  -7   3    2.64    3.43   0
 -45   1   7   -3.71    3.04   0
 -44 -10   2    1.18    3.47   0
 -44  -6   3    8.75    3.05   0
 -44   0   6    1.78    2.89   0
 -43  -5   3    4.18    2.85   0
 -43   1   6    0.70    2.74   0
 -43   3   8    3.92    3.28   0
 -42 -12   1    1.67    3.66   0
 -42  -4   3    6.27    2.81   0
 -42  -2   4    2.04    2.22   0
 -42   0   5    0.30    2.77   0
 -41  -9   1    1.03    3.33   0
 -41  -3   3    6.12    2.84   0
 -41  -1   4    0.99    2.90   0
 -41   3   7   16.02    3.10   0
 -40  -8   1   10.56    3.03   0
 -40  -2   3    4.07    2.63   0
 -40   6  10    5.29    2.90   0
 -39 -13   0   -0.20    3.68   0
 -39  -7   1    5.67    2.58   0
 -39   3   6    4.23    2.56   0
 -39   7  11    2.60    3.01   0
 -38 -10   0   23.94    3.52   0
 -38  -6   1    0.70    2.34   0
 -38   6   9    3.53    2.80   0
 -37  -5   1    4.01    2.55   0
 -37   1   4    8.36    1.89   0
 -37   7  10    0.75    2.91   0
 -36  -4   1   10.92    2.62   0
 -36  -2   2    5.88    1.77   0
 -36   0   3   26.86    2.62   0
 -36   4   6   16.22    2.63   0
 -36   6   8   13.30    2.39   0
 -36   8  12    0.81    2.44   0
 -35 -13  -1    1.04    3.41   0
 -35   7   9    1.22    2.59   0
 -35   9  13   -0.44    3.21   0
 -34 -10  -1    6.21    3.16   0
 -33  -9  -1   16.57    2.65   0
 -33  -5   0   36.29    2.66   0
 -33   3   4    3.31    2.11   0
 -33   5   6   14.24    2.33   0
 -33   9  12    0.15    3.19   0
 -32  -4   0   53.91    2.46   0
 -32   0   2   -0.84    1.67   0
 -32  10  14    3.09    3.10   0
 -31  -7  -1    0.25    2.36   0
 -31   9  11    4.20    2.94   0
 -30 -12  -2    8.60    3.35   0
 -30  -6  -1   17.17    2.40   0
 -30   6   6   26.85    2.36   0
 -30   8   9    5.84    1.81   0
 -30  10  13   10.31    3.19   0
 -29   5   5    6.70    1.55   0
 -29   7   7   30.10    2.40   0
 -29   9  10   33.11    2.79   0
 -28  -2   0    0.64    2.03   0
 -28   0   1    3.05    2.12   0
 -28   8   8   51.02    2.47   0
 -28  10  12    1.64    3.05   0
 -27  11  15    1.03    3.43   0
 -26  -4  -1   34.69    2.43   0
 -26   6   5   20.20    2.20   0
 -26  10  11   18.65    2.90   0
 -25  -1   0   51.61    2.35   0
 -25   5   4   17.42    2.33   0
 -25   7   6   24.51    2.24   0
 -25   9   9   32.43    1.86   0
 -25  11  14    6.90    3.23   0
 -24   4   3   12.05    2.14   0
 -24   8   7    2.34    2.10   0
 -23   3   2  188.71    3.03   0
 -23  11  13    1.68    2.87   0
 -22  10  10   60.40    2.76   0
 -21  -5  -2   32.04    2.78   0
 -21   9   8    7.34    2.26   0
 -21  11  12    2.85    2.41   0
 -20  -2  -1   77.57    2.71   0
 -20   2   1   50.40    2.49   0
 -19 -19  -3    6.80    4.28   0
 -19   7   5    2.47    2.01   0
 -18  -8  -3  115.73    4.83   0
 -18   6   4  102.17    2.51   0
 -17   5   3   11.86    2.17   0
 -17   7   5   68.92    1.94   0
 -16   8   6   19.86    2.19   0
 -16  12  16    3.48    3.62   0
 -16  12  17    4.27    3.80   0
 -14   4   2  255.77    3.58   0
 -14   8   6  131.43    2.32   0
 -14  10   9   49.82    2.61   0
 -14  12  16   13.21    3.55   0
 -14  12  17   -0.75    3.76   0
 -13 -21  -3    5.61    3.45   0
 -13   1   0   23.68    2.29   0
 -12   4   2  124.11    2.60   0
 -12   8   6  598.40    4.25   0
 -12  10   9    0.31    2.23   0
 -11   1   0    9.37    1.74   0
 -10   4   2  848.41    5.75   0
 -10   8   6   73.23    2.09   0
 -10  10   9   74.80    2.60   0
  -9   1   0  130.13    3.37   0
  -9  11  12    4.97    2.43   0
  -8   4   2  371.62    4.59   0
  -8   8   6  311.58    3.76   0
  -7 -21  -3    5.44    3.28   0
  -7  -1  -1  691.43    9.36   0
  -7  11  12   23.32    2.72   0
  -5 -21  -3   20.89    2.96   0
  -5   5   3  386.19    4.72   0
  -5   7   5  217.66    3.57   0
  -5  11  13   22.35    2.76   0
  -4   6   4  396.23    4.68   0
  -4  10  10    9.04    2.25   0
  -3  11  14    1.80    3.25   0
  -3  11  18    3.08    4.27   0
  -2 -24  -2    4.00    3.39   0
  -2 -20  -3    0.69    2.90   0
  -2  -8  -3   26.30    2.52   0
  -2   2   1   73.26    3.60   0
   1 -23  -2    2.81    2.77   0
   1 -19  -3    1.74    2.73   0
   1   7   6  239.64    4.36   0
   2 -10  -3    3.33    2.22   0
   2   6   5   78.62    3.59   0
   2  10  13   20.71    3.30   0
   3 -17  -3    4.63    2.28   0
   3 -11  -3   50.29    2.43   0
   3   9  10   40.33    2.99   0
   4 -22  -2    8.66    2.86   0
   4 -16  -3   11.37    2.35   0
   4 -14  -3   14.63    2.29   0
   4 -12  -3    8.68    2.14   0
   6 -24  -1    4.00    3.33   0
   6  -4  -1    7.01    2.04   0
   7   9  13    9.52    3.93   0
   7   9  18   -0.03    5.09   0
   9 -25   0    0.51    3.21   0
   9 -23  -1   11.57    2.36   0
   9  -3   0   14.00    2.54   0
   9  -1   1   89.22    3.30   0
  10 -22  -1    5.11    3.06   0
  10 -16  -2    7.82    2.39   0
  10 -14  -2   35.48    2.21   0
  10 -12  -2   98.71    2.52   0
  11 -21  -1   25.80    2.74   0
  11  -7  -1  221.84    2.99   0
  12 -20  -1    1.97    2.65   0
  12  -8  -1    3.10    2.11   0
  12   2   4  202.45    4.65   0
  13 -23   0    2.52    3.04   0
  13 -19  -1   10.80    2.62   0
  13  -9  -1   37.81    1.76   0
  13  -3   1 1016.86    6.46   0
  14 -22   0   19.21    2.98   0
  14 -18  -1    1.97    1.84   0
  14 -16  -1   11.24    2.21   0
  14 -12  -1   59.98    2.43   0
  15 -21   0    7.15    2.85   0
  15 -15  -1   38.82    1.85   0
  15 -13  -1   60.84    1.96   0
  15  -7   0    2.59    1.56   0
  16 -20   0    0.70    2.83   0
  16  -8   0   11.40    1.58   0
  17 -19   0    0.42    1.99   0
  18 -16   0   18.57    2.30   0
  18 -14   0   51.71    2.40   0
  18 -12   0   33.64    1.84   0
  18   2   7   15.03    2.73   0
  19 -23   2    4.72    3.12   0
  20 -22   2    2.43    3.03   0
  20 -18   1   15.42    2.59   0
  20 -10   1   37.63    2.34   0
  20  -4   3   45.22    1.86   0
  20   0   6    5.11    2.25   0
  21 -21   2    4.11    2.49   0
  21 -15   1   15.84    2.27   0
  21 -13   1   17.30    1.75   0
  21  -5   3   19.63    2.04   0
  21   1   8   43.06    3.01   0
  21   3  12   19.13    3.41   0
  22 -22   3    3.79    3.56   0
  22 -18   2    1.97    2.50   0
  22 -10   2   12.88    2.09   0
  22  -6   3    6.43    1.58   0
  22  -4   4   33.71    1.72   0
  22   2  11   21.77    3.17   0
  23 -21   3    9.95    3.12   0
  23 -17   2   24.45    1.97   0
  23 -15   2   12.69    2.53   0
  23 -13   2    8.98    2.22   0
  23 -11   2    7.87    1.55   0
  23  -5   4  139.45    2.36   0
  23  -1   7   15.38    2.25   0
  23   1  10   15.63    2.92   0
  24 -18   3    1.12    2.50   0
  24 -10   3   25.38    2.18   0
  25 -17   3    1.14    1.95   0
  25 -15   3   15.03    2.54   0
  25 -13   3   21.01    2.34   0
  25 -11   3    7.05    1.75   0
  25  -3   7    3.20    2.14   0
  25  -1   9   21.76    2.59   0
  26 -18   4    2.46    3.11   0
  26 -10   4    5.97    2.40   0
  26  -4   7   17.46    2.33   0
  26   0  14   -0.30    3.33   0
  26   0  15    5.32    3.93   0
  27 -19   5    2.27    3.10   0
  27 -15   4   10.60    2.47   0
  27 -13   4   14.79    1.98   0
  27  -9   5   27.56    2.68   0
  27  -5   7   15.09    2.50   0
  27  -1  13   -0.25    3.08   0
  27  -1  14    2.30    3.53   0
  27  -1  15    2.18    3.81   0
  28 -18   5   17.38    2.54   0
  28 -16   5    7.91    3.12   0
  28 -14   5    3.35    2.55   0
  28 -12   5    7.40    2.75   0
  28  -8   6   26.07    2.71   0
  28  -6   7   18.60    2.39   0
  28  -2  12    5.93    3.07   0
  28  -2  13    1.68    3.27   0
  28  -2  14    0.80    3.55   0
  29 -17   6   -0.24    3.48   0
  29 -11   6    9.12    2.77   0
  29  -5   9   31.81    2.93   0
  29  -3  12    8.93    2.96   0
  29  -3  13    1.78    3.15   0
  29  -3  14    1.45    3.68   0
  30 -10   7    0.10    2.75   0
  30  -8   8    4.08    2.85   0
  30  -6  10   -1.22    2.71   0
  30  -4  13    2.43    3.47   0
  31 -15   7    0.65    2.36   0
  31 -11   8   13.31    3.20   0
  31  -9   9    0.78    2.74   0
  31  -7  10    2.17    3.09   0
  32 -12   9   16.33    3.45   0
  32 -10  10   -1.84    2.99   0
  32  -8  11    1.71    3.44   0
 -47  -5   4    2.21    3.19   0
 -47  -3   5    2.30    3.44   0
 -46  -4   4    5.05    3.06   0
 -46  -2   5    2.40    3.05   0
 -44  -8   2    2.10    3.05   0
 -44   2   7    3.50    3.25   0
 -44   4   9    4.11    3.56   0
 -43  -7   2    1.88    3.26   0
 -43   5  10    4.30    3.24   0
 -42 -10   1    9.99    3.91   0
 -42  -6   2    3.59    2.72   0
 -42   4   8    2.08    3.19   0
 -41   1   5   12.82    2.85   0
 -41   5   9   17.51    2.46   0
 -40   0   4    3.80    2.47   0
 -40   4   7   -1.76    3.07   0
 -39 -11   0    1.65    3.58   0
 -39  -3   2    7.93    2.73   0
 -39  -1   3   11.91    2.64   0
 -39   5   8    0.96    2.15   0
 -38   8  12    0.48    3.13   0
 -37   3   5   20.31    2.63   0
 -37   5   7    5.30    2.46   0
 -36   2   4    7.86    2.31   0
 -36   8  11    0.97    2.36   0
 -35 -17  -1    0.84    5.50   0
 -35 -11  -1    1.67    3.33   0
 -35  -3   1   12.62    2.50   0
 -35   1   3   16.28    2.66   0
 -35   5   6    1.15    2.30   0
 -35   9  12    1.85    3.31   0
 -34   4   5   -1.39    2.13   0
 -34   6   7   36.75    2.42   0
 -34   8  10    1.06    2.04   0
 -33   7   8    6.06    1.86   0
 -33   9  11    2.33    2.87   0
 -32   2   3   42.86    1.90   0
 -32   8   9   33.73    2.07   0
 -32  10  13    0.81    3.15   0
 -31  -3   0   15.74    2.20   0
 -31  -1   1    1.35    2.22   0
 -31   1   2   23.03    2.43   0
 -31   5   5   48.57    2.43   0
 -31   7   7   29.06    2.35   0
 -31   9  10    7.29    2.80   0
 -30   4   4    9.98    1.67   0
 -30   8   8    2.88    2.34   0
 -30  10  12    4.03    3.05   0
 -29  -5  -1   23.40    2.37   0
 -29   3   3   27.14    1.77   0
 -28   2   2   13.06    2.29   0
 -28  10  11    7.26    2.91   0
 -27   5   4   24.77    2.27   0
 -27   7   6    2.16    2.29   0
 -27   9   9    4.62    1.77   0
 -27  11  13    6.04    2.81   0
 -27  11  14    9.39    3.13   0
 -26 -20  -2    1.93    6.21   0
 -26   4   3   15.67    2.34   0
 -26   8   7    5.07    2.20   0
 -25  -3  -1    3.32    2.03   0
 -25   1   1    3.20    1.48   0
 -25  11  13    8.50    2.74   0
 -24  -6  -2    7.59    2.33   0
 -24  10  10    7.56    1.86   0
 -23 -11  -3   18.00    4.33   0
 -23   9   8   15.58    1.68   0
 -23  11  12    3.88    2.65   0
 -22 -10  -3    8.24    3.84   0
 -22   0   0  224.95    3.44   0
 -22  12  16    0.64    3.15   0
 -21   7   5   22.68    2.25   0
 -20   6   4  107.81    2.14   0
 -20   8   6   35.38    2.34   0
 -20  10   9    9.49    2.40   0
 -20  12  15    2.65    3.22   0
 -20  12  16    7.02    3.55   0
 -19   5   3  215.28    2.75   0
 -18  -4  -2   80.15    2.88   0
 -18   4   2   42.97    2.40   0
 -18   8   6   -0.05    1.43   0
 -18  10   9   78.38    2.19   0
 -18  12  14    5.73    2.77   0
 -18  12  16    3.43    3.10   0
 -17   9   7   57.50    2.38   0
 -17  11  11    4.04    2.28   0
 -16 -20  -3    2.33    3.66   0
 -16   4   2  639.36    4.53   0
 -16  12  15   -0.87    3.16   0
 -15  -7  -3  133.78    5.69   0
 -15  -1  -1    8.91    1.95   0
 -15   1   0  120.99    2.70   0
 -15   9   7    2.33    2.11   0
 -15  11  11   12.15    1.83   0
 -14 -24  -2    0.25    4.09   0
 -14  12  14    4.08    2.88   0
 -14  12  15   28.57    3.28   0
 -13   9   7   58.75    2.22   0
 -13  11  11   10.32    1.82   0
 -12  12  14   16.43    3.31   0
 -12  12  15    2.86    3.10   0
 -12  12  16    2.25    3.33   0
 -12  12  17    6.03    3.64   0
 -11 -21  -3    2.47    3.12   0
 -11   9   7  196.79    3.05   0
 -10  12  16    0.74    3.33   0
 -10  12  17   -1.00    3.63   0
  -9 -21  -3   11.87    3.06   0
  -9   9   7  158.72    2.95   0
  -9  11  11   28.82    2.56   0
  -8  10   9   57.37    2.47   0
  -7  -7  -3   54.03    4.04   0
  -7   1   0   14.63    2.32   0
  -6 -24  -2    2.76    3.58   0
  -6   4   2  806.38    6.68   0
  -6   8   6  182.63    3.34   0
  -6  10   9    6.04    2.56   0
  -5  11  12   14.22    2.53   0
  -4 -24  -2    1.11    3.42   0
  -4 -20  -3   35.66    3.01   0
  -3   9   8   15.04    2.39   0
  -3  11  13   10.23    2.65   0
  -1 -23  -2    8.69    3.10   0
  -1 -19  -3   47.14    2.89   0
  -1  11  15    2.16    3.29   0
  -1  11  16    1.32    3.59   0
  -1  11  17   10.75    3.76   0
   0 -18  -3    3.20    2.37   0
   0   8   7    2.22    2.13   0
   0  10  11   83.82    3.45   0
   1 -17  -3    2.12    2.49   0
   1   9   9    6.94    2.75   0
   2 -22  -2   -0.55    2.87   0
   2 -16  -3  147.55    3.05   0
   2   4   3  127.05    4.72   0
   2  10  12    9.42    2.82   0
   3 -25  -1   -1.39    3.22   0
   3 -15  -3    7.75    2.23   0
   3 -13  -3   71.31    2.61   0
   3  -3  -1 1591.47   11.67   0
   4 -24  -1    2.95    2.97   0
   4  10  15    9.26    3.55   0
   4  10  16   -0.17    3.71   0
   4  10  17    1.10    4.38   0
   5 -21  -2   17.49    2.64   0
   5  -7  -2  254.36    3.58   0
   5   7   7   24.46    3.12   0
   5   9  11   28.53    3.29   0
   6 -20  -2   18.88    2.65   0
   6  -8  -2  136.84    3.09   0
   6   6   6    2.23    2.92   0
   7 -23  -1   14.59    3.09   0
   7 -19  -2   15.60    2.54   0
   7  -9  -2   97.33    2.89   0
   8 -22  -1   17.78    2.76   0
   8 -18  -2    9.06    2.48   0
   8 -10  -2   40.51    2.34   0
   9 -17  -2   63.32    2.11   0
   9 -15  -2    7.80    2.33   0
   9 -13  -2    4.11    1.92   0
   9 -11  -2   27.28    1.73   0
  10 -24   0    1.87    3.27   0
  11 -23   0    4.44    2.94   0
  13 -17  -1    5.18    2.40   0
  13 -11  -1   58.99    2.32   0
  14 -24   1    5.25    3.17   0
  14 -14  -1    7.61    2.16   0
  14  -2   2  688.46    5.59   0
  15 -23   1    1.93    3.32   0
  16 -22   1    4.11    3.03   0
  16 -18   0    1.88    2.52   0
  16 -10   0    9.47    2.08   0
  17 -21   1   11.66    3.09   0
  17 -17   0   14.52    1.77   0
  17 -15   0    6.34    2.25   0
  17 -13   0    1.36    2.15   0
  17 -11   0   25.17    1.80   0
  17  -7   1   89.10    2.55   0
  17   5  12   23.26    4.22   0
  18 -20   1    1.19    2.66   0
  18  -8   1   11.11    2.19   0
  18   0   5    1.12    2.07   0
  19 -19   1    3.14    1.98   0
  19  -9   1   50.47    1.81   0
  20 -20   2    5.58    2.71   0
  20 -16   1   12.13    1.72   0
  20 -14   1    7.68    2.31   0
  20 -12   1    5.27    1.64   0
  21 -19   2    2.80    2.83   0
  21  -9   2   29.71    2.34   0
  21   3  13    7.45    3.62   0
  22 -16   2    5.78    2.47   0
  22 -14   2   44.15    2.36   0
  22 -12   2   24.30    2.30   0
  23 -19   3   11.16    2.91   0
  23  -9   3   31.24    2.36   0
  24 -20   4   -0.18    3.02   0
  24 -16   3    0.67    2.48   0
  24 -14   3    9.90    2.34   0
  24 -12   3   23.85    2.44   0
  24   0  10   32.00    3.12   0
  25 -19   4    9.67    2.95   0
  25  -9   4    4.34    2.34   0
  26 -16   4    1.02    2.49   0
  26 -14   4    8.50    2.44   0
  26 -12   4    3.83    2.18   0
  26  -8   5   33.19    2.53   0
  26  -6   6   13.07    2.49   0
  27 -17   5    0.41    3.16   0
  27 -11   5   14.13    2.57   0
  27  -7   6    2.46    1.86   0
  28 -18   6    2.71    3.47   0
  28 -10   6    5.68    2.63   0
  28  -6   8    4.52    2.53   0
  29 -15   6   17.73    2.88   0
  29 -13   6   15.40    2.82   0
  29  -9   7   10.05    2.62   0
  29  -7   8   17.90    2.63   0
  29  -5  10    8.75    2.89   0
  30 -16   7    2.18    2.52   0
  30 -14   7    0.66    2.83   0
  30 -12   7    1.60    2.14   0
  30 -10   8    1.43    2.64   0
  30  -8   9   26.43    2.81   0
  30  -6  11    3.74    2.90   0
  31 -15   8    2.26    3.14   0
  31 -13   8    4.48    2.91   0
  31 -11   9    6.28    2.96   0
  31  -9  10    8.35    3.01   0
  31  -7  11    3.54    2.92   0
  31  -7  12    0.06    3.17   0
  32 -12  10    4.06    3.62   0
  32 -10  11    4.54    3.52   0
 -46  -6   3    5.27    3.21   0
 -46   0   6    2.51    3.40   0
 -45  -9   2    3.04    3.62   0
 -45  -5   3    4.99    3.34   0
 -45  -3   4    2.51    2.36   0
 -45  -1   5    5.76    2.94   0
 -45   1   6    5.95    3.07   0
 -45   3   8    0.50    3.34   0
 -44  -4   3    3.22    3.18   0
 -44  -2   4    8.17    3.13   0
 -44   0   5   21.94    3.25   0
 -43 -11   1    1.38    3.77   0
 -43  -3   3    8.07    2.80   0
 -43  -1   4    9.42    3.02   0
 -43   3   7    3.21    3.21   0
 -43   5   9   -2.04    3.51   0
 -42   6  10    0.62    3.21   0
 -41  -7   1    2.37    3.21   0
 -41   3   6   12.02    3.01   0
 -41   5   8    3.81    3.23   0
 -40 -12   0    2.90    3.80   0
 -40  -6   1    2.94    2.69   0
 -40   2   5   11.10    2.62   0
 -40   6   9   -1.11    2.87   0
 -39  -5   1   10.70    2.54   0
 -39   5   7    2.21    2.67   0
 -39   7  10    3.58    2.30   0
 -38  -8   0    4.86    3.21   0
 -38  -2   2   17.16    2.71   0
 -38   4   6    2.92    2.02   0
 -38   6   8    1.77    2.65   0
 -38   8  11    5.00    3.02   0
 -37  -7   0    6.77    2.71   0
 -37   7   9    6.37    2.01   0
 -37   9  12    0.28    3.17   0
 -36 -14  -1   11.10    4.52   0
 -36 -12  -1    6.98    3.59   0
 -36  -6   0    2.90    2.56   0
 -36   4   5   22.09    2.42   0
 -36   6   7    5.01    2.54   0
 -36   8  10   11.88    2.69   0
 -35  -5   0    9.57    2.48   0
 -35   3   4    1.21    2.36   0
 -35   7   8   19.77    2.56   0
 -35   9  11   -2.03    3.23   0
 -34  -2   1   32.35    2.43   0
 -34   0   2   14.71    1.82   0
 -34   2   3    8.91    2.47   0
 -34   8   9    7.31    2.55   0
 -34  10  13    3.96    3.40   0
 -33   5   5    9.52    2.32   0
 -33   9  10    8.63    2.72   0
 -32   4   4   17.62    2.35   0
 -32   6   6    1.12    1.69   0
 -32   8   8   49.13    2.49   0
 -32  10  12    0.63    3.12   0
 -31 -15  -2   17.85    5.14   0
 -31 -13  -2   25.35    4.02   0
 -31   3   3   53.78    2.44   0
 -31  11  14   -0.53    3.26   0
 -30 -10  -2    6.43    3.06   0
 -30   0   1    4.94    2.18   0
 -30  10  11    3.82    2.87   0
 -29  -9  -2   16.63    2.99   0
 -29   5   4    0.81    1.97   0
 -29   7   6   11.13    2.38   0
 -29   9   9   20.31    1.90   0
 -29  11  13    3.53    3.15   0
 -29  11  14    0.99    2.63   0
 -28  -8  -2   24.12    3.08   0
 -28  -4  -1   25.94    2.33   0
 -28   6   5   35.82    1.77   0
 -28   8   7    6.66    2.22   0
 -28  10  10    0.71    2.49   0
 -27  -7  -2   37.76    3.07   0
 -27  -1   0   11.97    2.19   0
 -27   1   1  301.36    3.41   0
 -27   9   8   28.37    2.36   0
 -27  11  12    6.80    2.69   0
 -26  10  10   10.55    1.88   0
 -25   3   2   76.71    2.02   0
 -25   9   8   10.16    1.67   0
 -25  11  12    0.77    2.05   0
 -24 -12  -3   25.78    4.84   0
 -24   0   0   11.90    2.02   0
 -24   6   4    3.15    2.07   0
 -24  10   9   52.06    2.66   0
 -24  12  15    6.26    3.55   0
 -23  -5  -2   31.16    2.92   0
 -23   7   5  115.03    2.72   0
 -23  11  11    7.06    2.71   0
 -22 -22  -2    1.68    4.58   0
 -22  -2  -1   31.40    2.15   0
 -22   2   1  165.05    2.68   0
 -22   6   4   22.41    1.65   0
 -22   8   6    6.40    2.03   0
 -22  10   9   60.97    2.17   0
 -22  12  14    2.86    3.09   0
 -22  12  15    6.14    3.12   0
 -21  -9  -3   32.34    3.70   0
 -21   5   3  223.82    2.72   0
 -21   9   7    2.25    2.10   0
 -20 -18  -3   26.09    4.57   0
 -20   4   2    4.24    2.13   0
 -20  12  13   18.40    2.71   0
 -20  12  14    5.37    2.76   0
 -19 -23  -2    3.69    4.35   0
 -19   9   7   22.43    1.75   0
 -18  12  13    4.29    2.85   0
 -17  -1  -1    5.18    2.12   0
 -17   1   0   30.55    1.88   0
 -17  11  10   10.63    2.59   0
[truncated: 1,763,038 more chars]
