# Supplementary material
Source: MDPI journal article supplement (https://www.mdpi.com/2304-6740/7/10/117)
Supplement: s1 [file s1 › inorganics-584457-Supplementary Materials/CIF and CIFcheck files/K(18c6)Zn10.cif]

####################################################################### 
# 
# This file contains crystal structure data downloaded from the 
# Cambridge Structural Database (CSD) hosted by the Cambridge 
# Crystallographic Data Centre (CCDC).
# 
# Full information about CCDC data access policies and citation 
# guidelines are available at http://www.ccdc.cam.ac.uk/access/V1 
# 
# Audit and citation data items may have been added by the CCDC. 
# Please retain this information to preserve the provenance of 
# this file and to allow appropriate attribution of the data. 
# 
#######################################################################

data_k(18c6)zn10
_database_code_depnum_ccdc_archive 'CCDC 1918207'
loop_
_audit_author_name
_audit_author_address
'Igor Mueller'
;Philipps University Marburg
Germany
;
_audit_update_record             
;
2019-06-05 deposited with the CCDC.	2019-08-14 downloaded from the CCDC.
;
_audit_creation_date             2019-06-05
_audit_creation_method           
;
Olex2 1.2-alpha
(compiled 2018.07.26 svn.r3523 for OlexSys, GUI svn.r5532)
;
_shelx_SHELXL_version_number     2018/3
_audit_contact_author_address    ?
_audit_contact_author_email      ?
_audit_contact_author_phone      ?
_publ_contact_author_id_orcid    ?
_publ_section_references         
;
Bourhis, L.J., Dolomanov, O.V., Gildea, R.J., Howard, J.A.K., Puschmann, H.
 (2015). Acta Cryst. A71, 59-75.

Dolomanov, O.V., Bourhis, L.J., Gildea, R.J, Howard, J.A.K. & Puschmann, H.
 (2009), J. Appl. Cryst. 42, 339-341.

Sheldrick, G.M. (2015). Acta Cryst. C71, 3-8.
;
_chemical_name_common            ?
_chemical_name_systematic        ?
_chemical_formula_moiety         'C22 H44 N4 Si4 Zn, C16 H34 K O7'
_chemical_formula_sum            'C38 H78 K N4 O7 Si4 Zn'
_chemical_formula_weight         919.87
_chemical_melting_point          ?
loop_
_atom_type_symbol
_atom_type_description
_atom_type_scat_dispersion_real
_atom_type_scat_dispersion_imag
_atom_type_scat_source
C C 0.0033 0.0016 'International Tables Vol C Tables 4.2.6.8 and 6.1.1.4'
H H 0.0000 0.0000 'International Tables Vol C Tables 4.2.6.8 and 6.1.1.4'
K K 0.2009 0.2494 'International Tables Vol C Tables 4.2.6.8 and 6.1.1.4'
N N 0.0061 0.0033 'International Tables Vol C Tables 4.2.6.8 and 6.1.1.4'
O O 0.0106 0.0060 'International Tables Vol C Tables 4.2.6.8 and 6.1.1.4'
Si Si 0.0817 0.0704 'International Tables Vol C Tables 4.2.6.8 and 6.1.1.4'
Zn Zn 0.2839 1.4301 'International Tables Vol C Tables 4.2.6.8 and 6.1.1.4'

_shelx_space_group_comment       
;
The symmetry employed for this shelxl refinement is uniquely defined
by the following loop, which should always be used as a source of
symmetry information in preference to the above space-group names.
They are only intended as comments.
;
_space_group_crystal_system      monoclinic
_space_group_IT_number           14
_space_group_name_H-M_alt        'P 1 21/c 1'
_space_group_name_Hall           '-P 2ybc'
loop_
_space_group_symop_operation_xyz
'x, y, z'
'-x, y+1/2, -z+1/2'
'-x, -y, -z'
'x, -y-1/2, z-1/2'

_cell_length_a                   12.1899(7)
_cell_length_b                   18.4365(10)
_cell_length_c                   22.8273(13)
_cell_angle_alpha                90
_cell_angle_beta                 95.423(2)
_cell_angle_gamma                90
_cell_volume                     5107.2(5)
_cell_formula_units_Z            4
_cell_measurement_reflns_used    9929
_cell_measurement_temperature    100.0
_cell_measurement_theta_max      26.43
_cell_measurement_theta_min      2.26
_shelx_estimated_absorpt_T_max   0.902
_shelx_estimated_absorpt_T_min   0.724
_exptl_absorpt_coefficient_mu    0.700
_exptl_absorpt_correction_T_max  0.7454
_exptl_absorpt_correction_T_min  0.6647
_exptl_absorpt_correction_type   multi-scan
_exptl_absorpt_process_details   
'SADABS-2016/2 (Bruker,2016/2) was used for absorption correction. wR2(int) was 0.1330 before and 0.0638 after correction. The Ratio of minimum to maximum transmission is 0.8917. The \l/2 correction factor is Not present.'
_exptl_absorpt_special_details   ?
_exptl_crystal_colour            'clear dark pink'
_exptl_crystal_colour_lustre     clear
_exptl_crystal_colour_modifier   dark
_exptl_crystal_colour_primary    pink
_exptl_crystal_density_diffrn    1.196
_exptl_crystal_density_meas      ?
_exptl_crystal_density_method    ?
_exptl_crystal_description       block
_exptl_crystal_F_000             1980
_exptl_crystal_size_max          0.492
_exptl_crystal_size_mid          0.383
_exptl_crystal_size_min          0.15
_exptl_transmission_factor_max   ?
_exptl_transmission_factor_min   ?
_diffrn_reflns_av_R_equivalents  0.0946
_diffrn_reflns_av_unetI/netI     0.0427
_diffrn_reflns_Laue_measured_fraction_full 0.999
_diffrn_reflns_Laue_measured_fraction_max 0.999
_diffrn_reflns_limit_h_max       14
_diffrn_reflns_limit_h_min       -14
_diffrn_reflns_limit_k_max       21
_diffrn_reflns_limit_k_min       -21
_diffrn_reflns_limit_l_max       27
_diffrn_reflns_limit_l_min       -27
_diffrn_reflns_number            96672
_diffrn_reflns_point_group_measured_fraction_full 0.999
_diffrn_reflns_point_group_measured_fraction_max 0.999
_diffrn_reflns_theta_full        24.999
_diffrn_reflns_theta_max         24.999
_diffrn_reflns_theta_min         2.134
_diffrn_ambient_temperature      100.0
_diffrn_detector                 'Bruker APEX2 area detector'
_diffrn_detector_area_resol_mean 7.9
_diffrn_detector_type            'CCD area detector'
_diffrn_measured_fraction_theta_full 0.999
_diffrn_measured_fraction_theta_max 0.999
_diffrn_measurement_device       'three-circle diffractometer'
_diffrn_measurement_device_type  'Bruker Quest D8'
_diffrn_measurement_method       '\w and \f scans'
_diffrn_radiation_monochromator  'mirror optics'
_diffrn_radiation_probe          x-ray
_diffrn_radiation_type           MoK\a
_diffrn_radiation_wavelength     0.71073
_diffrn_source                   'microfocus sealed X-ray tube'
_diffrn_source_type              'Incoatec I\ms'
_diffrn_standards_number         0
_reflns_Friedel_coverage         0.000
_reflns_Friedel_fraction_full    .
_reflns_Friedel_fraction_max     .
_reflns_number_gt                7347
_reflns_number_total             8987
_reflns_special_details          
;
 Reflections were merged by SHELXL according to the crystal
 class for the calculation of statistics and refinement.
 
 _reflns_Friedel_fraction is defined as the number of unique
 Friedel pairs measured divided by the number that would be
 possible theoretically, ignoring centric projections and
 systematic absences.
;
_reflns_threshold_expression     'I > 2\s(I)'
_computing_cell_refinement       'SAINT v8.37A (Bruker, 2015)'
_computing_data_collection       ?
_computing_data_reduction        'SAINT v8.37A (Bruker, 2015)'
_computing_molecular_graphics    'Olex2 (Dolomanov et al., 2009)'
_computing_publication_material  'Olex2 (Dolomanov et al., 2009)'
_computing_structure_refinement  'ShelXL (Sheldrick, 2015)'
_computing_structure_solution    'olex2.solve (Bourhis et al., 2015)'
_refine_diff_density_max         1.777
_refine_diff_density_min         -1.895
_refine_diff_density_rms         0.151
_refine_ls_extinction_coef       .
_refine_ls_extinction_method     none
_refine_ls_goodness_of_fit_ref   1.086
_refine_ls_hydrogen_treatment    constr
_refine_ls_matrix_type           full
_refine_ls_number_parameters     693
_refine_ls_number_reflns         8987
_refine_ls_number_restraints     1954
_refine_ls_R_factor_all          0.1506
_refine_ls_R_factor_gt           0.1281
_refine_ls_restrained_S_all      1.015
_refine_ls_shift/su_max          0.000
_refine_ls_shift/su_mean         0.000
_refine_ls_structure_factor_coef Fsqd
_refine_ls_weighting_details     
'w=1/[\s^2^(Fo^2^)+(0.0002P)^2^+100.8345P] where P=(Fo^2^+2Fc^2^)/3'
_refine_ls_weighting_scheme      calc
_refine_ls_wR_factor_gt          0.2499
_refine_ls_wR_factor_ref         0.2596
_refine_special_details          ?
_olex2_refinement_description    
;
1. Fixed Uiso
 At 1.2 times of:
  All C(H) groups, All C(H,H) groups
 At 1.5 times of:
  All C(H,H,H) groups
2. Restrained distances
 Si6-C28
 1.8 with sigma of 0.02
 O14-C59 \\sim O14-C60 \\sim O12-C41 \\sim O12-C45 \\sim O10-C46 \\sim O10-C47
\\sim O8-C48 \\sim O8-C49 ~
 O6-C50 \\sim O6-C67 \\sim O3-C65 \\sim O3-C62
 with sigma of 0.02
 C59-C41 \\sim C45-C46 \\sim C47-C48 \\sim C49-C50 \\sim C67-C65 \\sim C62-C60
 with sigma of 0.02
 C41-C45 \\sim C46-C47 \\sim C48-C49 \\sim C50-C67 \\sim C65-C62 \\sim C60-C59
 with sigma of 0.04
 O14-C41 \\sim O12-C46 \\sim O10-C48 \\sim O8-C50 \\sim O6-C65 \\sim O3-C60
\\sim O12-C59 \\sim O10-C45 ~
 O8-C47 \\sim O6-C49 \\sim O3-C67 \\sim O14-C62
 with sigma of 0.04
 O4-C63 \\sim O4-C39 \\sim O5-C64 \\sim O5-C68 \\sim O7-C69 \\sim O7-C51 \\sim
O9-C52 \\sim O9-C53 \\sim O11-
 C55 \\sim O11-C56 \\sim O13-C57 \\sim O13-C40
 with sigma of 0.02
 C63-C64 \\sim C68-C69 \\sim C51-C52 \\sim C53-C55 \\sim C56-C57 \\sim C40-C39
 with sigma of 0.02
 C64-C68 \\sim C69-C51 \\sim C52-C53 \\sim C55-C56 \\sim C57-C40 \\sim C39-C63
 with sigma of 0.04
 O4-C64 \\sim O5-C69 \\sim O7-C52 \\sim O9-C55 \\sim O11-C57 \\sim O13-C39
\\sim O5-C63 \\sim O7-C68 \\sim O9-
 C51 \\sim O11-C53 \\sim O13-C56 \\sim O4-C40
 with sigma of 0.04
 Si1-C20 \\sim Si1-C19
 with sigma of 0.02
 C37-C38 \\sim C35-C36
 with sigma of 0.02
 O2-C38 \\sim O2-C35
 with sigma of 0.02
 C37-O2 \\sim O2-C36
 with sigma of 0.04
 C34-C33 \\sim C32-C31
 with sigma of 0.02
 O1-C33 \\sim O1-C32
 with sigma of 0.02
 C34-O1 \\sim O1-C31
 with sigma of 0.04
 Si3-N4 \\sim Si3A-N4
 with sigma of 0.02
 Si3-C23 \\sim Si3A-C23A
 with sigma of 0.02
 Si3-C24 \\sim Si3A-C24A
 with sigma of 0.02
 Si3-C25 \\sim Si3A-C25A
 with sigma of 0.02
 N4-C23 \\sim N4-C23A
 with sigma of 0.04
 N4-C24 \\sim N4-C24A
 with sigma of 0.04
 N4-C25 \\sim N4-C25A
 with sigma of 0.04
 C23-C24 \\sim C23A-C24A
 with sigma of 0.04
 C23-C25 \\sim C23A-C25A
 with sigma of 0.04
 C24-C25 \\sim C24A-C25A
 with sigma of 0.04
 N4-Si6 \\sim N4-Si6A
 with sigma of 0.02
 C28-Si6 \\sim C28A-Si6A
 with sigma of 0.02
 Si6-C27 \\sim Si6A-C27A
 with sigma of 0.02
 Si6-C30 \\sim Si6A-C30A
 with sigma of 0.02
 N4-C28 \\sim N4-C28A
 with sigma of 0.04
 N4-C27 \\sim N4-C27A
 with sigma of 0.04
 N4-C30 \\sim N4-C30A
 with sigma of 0.04
 C28-C27 \\sim C28A-C27A
 with sigma of 0.04
 C28-C30 \\sim C28A-C30A
 with sigma of 0.04
 C27-C30 \\sim C27A-C30A
 with sigma of 0.04
 Zn1-N1 \\sim Zn1-N1A
 with sigma of 0.02
 Zn1-N2 \\sim Zn1-N2A
 with sigma of 0.02
 N1-C1 \\sim N1A-C1A
 with sigma of 0.02
 N1-C5 \\sim N1A-C5A
 with sigma of 0.02
 N2-C6 \\sim N2A-C6A
 with sigma of 0.02
 N2-C10 \\sim N2A-C10A
 with sigma of 0.02
 C1-C2 \\sim C1A-C2A
 with sigma of 0.02
 C2-C3 \\sim C2A-C3A
 with sigma of 0.02
 C3-C4 \\sim C3A-C4A
 with sigma of 0.02
 C4-C5 \\sim C4A-C5A
 with sigma of 0.02
 C5-C6 \\sim C5A-C6A
 with sigma of 0.02
 C6-C7 \\sim C6A-C7A
 with sigma of 0.02
 C7-C8 \\sim C7A-C8A
 with sigma of 0.02
 C8-C9 \\sim C8A-C9A
 with sigma of 0.02
 C9-C10 \\sim C9A-C10A
 with sigma of 0.02
 Zn1-C1 \\sim Zn1-C1A
 with sigma of 0.04
 Zn1-C5 \\sim Zn1-C5A
 with sigma of 0.04
 Zn1-C6 \\sim Zn1-C6A
 with sigma of 0.04
 Zn1-C10 \\sim Zn1-C10A
 with sigma of 0.04
 N1-C2 \\sim N1A-C2A
 with sigma of 0.04
 N1-C4 \\sim N1A-C4A
 with sigma of 0.04
 N1-C6 \\sim N1A-C6A
 with sigma of 0.04
 N2-C5 \\sim N2A-C5A
 with sigma of 0.04
 N2-C7 \\sim N2A-C7A
 with sigma of 0.04
 N2-C9 \\sim N2A-C9A
 with sigma of 0.04
 C1-C3 \\sim C1A-C3A
 with sigma of 0.04
 C1-C5 \\sim C1A-C5A
 with sigma of 0.04
 C2-C4 \\sim C2A-C4A
 with sigma of 0.04
 C3-C5 \\sim C3A-C5A
 with sigma of 0.04
 C4-C6 \\sim C4A-C6A
 with sigma of 0.04
 C5-C7 \\sim C5A-C7A
 with sigma of 0.04
 C6-C8 \\sim C6A-C8A
 with sigma of 0.04
 C6-C10 \\sim C6A-C10A
 with sigma of 0.04
 C7-C9 \\sim C7A-C9A
 with sigma of 0.04
 C8-C10 \\sim C8A-C10A
 with sigma of 0.04
3. Uiso/Uaniso restraints and constraints
O3 \\sim O6 \\sim O8 \\sim O10 \\sim O12 \\sim O14 \\sim C41 \\sim C45 \\sim
C46 \\sim C47 \\sim C48 \\sim C49 \\sim C50 \\sim C59 \\sim C60 \\sim C62 \\sim
C65 \\sim C67: within 2A with sigma of 0.04 and sigma for terminal atoms of 0.08
O4 \\sim O5 \\sim O7 \\sim O9 \\sim O11 \\sim O13 \\sim C39 \\sim C40 \\sim C51
\\sim C52 \\sim C53 \\sim C55 \\sim C56 \\sim C57 \\sim C63 \\sim C64 \\sim C68
\\sim C69: within 2A with sigma of 0.04 and sigma for terminal atoms of 0.08
O1 \\sim C31 \\sim C32 \\sim C33 \\sim C34: within 2A with sigma of 0.04 and
sigma for terminal atoms of 0.08
O2 \\sim C35 \\sim C36 \\sim C37 \\sim C38: within 2A with sigma of 0.04 and
sigma for terminal atoms of 0.08
C23 \\sim C24 \\sim Si3 \\sim C25 \\sim N4 \\sim C30 \\sim Si6 \\sim C27:
within 2A with sigma of 0.04 and sigma for terminal atoms of 0.08
C23 \\sim C24 \\sim Si3 \\sim C25: within 2A with sigma of 0.04 and sigma for
terminal atoms of 0.08
N4 \\sim C27 \\sim Si6 \\sim C28 \\sim C30: within 2A with sigma of 0.04 and
sigma for terminal atoms of 0.08
N1 \\sim N2 \\sim C1 \\sim H1 \\sim C2 \\sim H2 \\sim C3 \\sim H3 \\sim C4
\\sim H4 \\sim C5 \\sim C6 \\sim C7 \\sim H7 \\sim C8 \\sim H8 \\sim C9 \\sim
H9 \\sim C10 \\sim H10: within 2A with sigma of 0.04 and sigma for terminal
atoms of 0.08
N1A \\sim N2A \\sim C1A \\sim C2A \\sim H2A \\sim C3A \\sim H3A \\sim C4A \\sim
H4A \\sim C5A \\sim C6A \\sim C7A \\sim H7A \\sim C8A \\sim H8A \\sim C9A \\sim
H9A \\sim C10A \\sim H10A \\sim H1A: within 2A with sigma of 0.04 and sigma for
terminal atoms of 0.08
Uanis(O14) \\sim Ueq, Uanis(O12) \\sim Ueq, Uanis(O10) \\sim Ueq, Uanis(O8)
\\sim Ueq, Uanis(O6) \\sim Ueq, Uanis(O3) \\sim Ueq, Uanis(C59) \\sim Ueq,
Uanis(C41) \\sim Ueq, Uanis(C45) \\sim Ueq, Uanis(C46) \\sim Ueq, Uanis(C47)
\\sim Ueq, Uanis(C48) \\sim Ueq, Uanis(C49) \\sim Ueq, Uanis(C50) \\sim Ueq,
Uanis(C67) \\sim Ueq, Uanis(C65) \\sim Ueq, Uanis(C62) \\sim Ueq, Uanis(C60)
\\sim Ueq: with sigma of 0.1 and sigma for terminal atoms of 0.2
Uanis(O4) \\sim Ueq, Uanis(O5) \\sim Ueq, Uanis(O7) \\sim Ueq, Uanis(O9) \\sim
Ueq, Uanis(O11) \\sim Ueq, Uanis(O13) \\sim Ueq, Uanis(C63) \\sim Ueq,
Uanis(C64) \\sim Ueq, Uanis(C68) \\sim Ueq, Uanis(C69) \\sim Ueq, Uanis(C51)
\\sim Ueq, Uanis(C52) \\sim Ueq, Uanis(C53) \\sim Ueq, Uanis(C55) \\sim Ueq,
Uanis(C56) \\sim Ueq, Uanis(C57) \\sim Ueq, Uanis(C40) \\sim Ueq, Uanis(C39)
\\sim Ueq: with sigma of 0.1 and sigma for terminal atoms of 0.2
Uanis(O1) \\sim Ueq, Uanis(C34) \\sim Ueq, Uanis(C33) \\sim Ueq, Uanis(C32)
\\sim Ueq, Uanis(C31) \\sim Ueq: with sigma of 0.1 and sigma for terminal atoms
of 0.2
Uanis(C36) \\sim Ueq, Uanis(C35) \\sim Ueq, Uanis(O2) \\sim Ueq, Uanis(C38)
\\sim Ueq, Uanis(C37) \\sim Ueq: with sigma of 0.1 and sigma for terminal atoms
of 0.2
Uanis(C23) \\sim Ueq, Uanis(C24) \\sim Ueq, Uanis(Si3) \\sim Ueq, Uanis(C25)
\\sim Ueq, Uanis(N4) \\sim Ueq, Uanis(C30) \\sim Ueq, Uanis(Si6) \\sim Ueq,
Uanis(C27) \\sim Ueq: with sigma of 0.1 and sigma for terminal atoms of 0.2
Uanis(C23) \\sim Ueq, Uanis(C24) \\sim Ueq, Uanis(Si3) \\sim Ueq, Uanis(C25)
\\sim Ueq: with sigma of 0.1 and sigma for terminal atoms of 0.2
Uanis(N4) \\sim Ueq, Uanis(C27) \\sim Ueq, Uanis(Si6) \\sim Ueq, Uanis(C28)
\\sim Ueq, Uanis(C30) \\sim Ueq: with sigma of 0.1 and sigma for terminal atoms
of 0.2
Uanis(Si6) \\sim Ueq, Uanis(C27) \\sim Ueq: with sigma of 0.01 and sigma for
terminal atoms of 0.0002
Uanis(C27) \\sim Ueq, Uanis(C28) \\sim Ueq, Uanis(C30) \\sim Ueq: with sigma of
0.01 and sigma for terminal atoms of 0.02
Uanis(N1) \\sim Ueq, Uanis(N2) \\sim Ueq, Uanis(C1) \\sim Ueq, Uanis(C2) \\sim
Ueq, Uanis(C3) \\sim Ueq, Uanis(C4) \\sim Ueq, Uanis(C5) \\sim Ueq, Uanis(C6)
\\sim Ueq, Uanis(C7) \\sim Ueq, Uanis(C8) \\sim Ueq, Uanis(C9) \\sim Ueq,
Uanis(C10) \\sim Ueq, : with sigma of 0.1 and sigma for terminal atoms of 0.2
Uanis(N1A) \\sim Ueq, Uanis(N2A) \\sim Ueq, Uanis(C1A) \\sim Ueq, Uanis(C2A)
\\sim Ueq, Uanis(C3A) \\sim Ueq, Uanis(C4A) \\sim Ueq, Uanis(C5A) \\sim Ueq,
Uanis(C6A) \\sim Ueq, Uanis(C7A) \\sim Ueq, Uanis(C8A) \\sim Ueq, Uanis(C9A)
\\sim Ueq, Uanis(C10A) \\sim Ueq, : with sigma of 0.1 and sigma for terminal
atoms of 0.2
Uanis(C6) = Uanis(C2)
Uanis(C10) = Uanis(C1)
Uanis(C34) = Uanis(C31) = Uanis(C32) = Uanis(C33)
Uanis(O14) = Uanis(O4) = Uanis(O3) = Uanis(O5) = Uanis(O6) = Uanis(O7) =
Uanis(O8) = Uanis(O9) = Uanis(O10) = Uanis(O11) = Uanis(O12) = Uanis(O13)
Uanis(C40) = Uanis(C59) = Uanis(C41) = Uanis(C50) = Uanis(C39)
Uanis(C25) = Uanis(C24) = Uanis(C23)
Uanis(C35) = Uanis(C38)
Uanis(C24) = Uanis(C25A)
Uanis(C24A) = Uanis(C23)
Uanis(C23A) = Uanis(C25)
Uanis(Si3) = Uanis(Si1) = Uanis(Si3A)
Uanis(C1) = Uanis(C7)
Uanis(C22) = Uanis(C21)
Uanis(Si6A) = Uanis(Si6)
Uanis(C27A) = Uanis(C27)
Uanis(C30A) = Uanis(C30)
Uanis(N1A) = Uanis(N4)
Uanis(N1) = Uanis(N3)
Uanis(C3) = Uanis(C3A)
Uanis(C2A) = Uanis(C2)
4. Rigid body (RIGU) restrains
 O3, O6, O8, O10, O12, O14, C41, C45, C46, C47, C48, C49, C50, C59, C60, C62,
 C65, C67
 with sigma for 1-2 distances of 0.004 and sigma for 1-3 distances of 0.004
 O4, O5, O7, O9, O11, O13, C39, C40, C51, C52, C53, C55, C56, C57, C63, C64,
 C68, C69
 with sigma for 1-2 distances of 0.004 and sigma for 1-3 distances of 0.004
 O1, C31, C32, C33, C34
 with sigma for 1-2 distances of 0.004 and sigma for 1-3 distances of 0.004
 O2, C35, C36, C37, C38
 with sigma for 1-2 distances of 0.004 and sigma for 1-3 distances of 0.004
 C23, C24, Si3, C25, N4, C30, Si6, C27
 with sigma for 1-2 distances of 0.004 and sigma for 1-3 distances of 0.004
 C23, C24, Si3, C25
 with sigma for 1-2 distances of 0.004 and sigma for 1-3 distances of 0.004
 N4, C27, Si6, C28, C30
 with sigma for 1-2 distances of 0.004 and sigma for 1-3 distances of 0.004
 N1, N2, C1, H1, C2, H2, C3, H3, C4, H4, C5, C6, C7, H7, C8, H8, C9, H9, C10,
 H10
 with sigma for 1-2 distances of 0.004 and sigma for 1-3 distances of 0.004
 N1A, N2A, C1A, C2A, H2A, C3A, H3A, C4A, H4A, C5A, C6A, C7A, H7A, C8A, H8A,
 C9A, H9A, C10A, H10A, H1A
 with sigma for 1-2 distances of 0.004 and sigma for 1-3 distances of 0.004
5. Others
 Fixed Sof: Si3(0.5) N1(0.5) N2(0.5) C1(0.5) H1(0.5) C2(0.5) H2(0.5) C3(0.5)
 H3(0.5) C4(0.5) H4(0.5) C5(0.5) C23(0.5) H23A(0.5) H23B(0.5) H23C(0.5)
 C24(0.5) H24A(0.5) H24B(0.5) H24C(0.5) C25(0.5) H25A(0.5) H25B(0.5) H25C(0.5)
 C28(0.5) H28A(0.5) H28B(0.5) H28C(0.5) Si6(0.5) C6(0.5) C7(0.5) H7(0.5)
 C8(0.5) H8(0.5) C9(0.5) H9(0.5) C10(0.5) H10(0.5) C20(0.5) H20A(0.5) H20B(0.5)
 H20C(0.5) C27(0.5) H27A(0.5) H27B(0.5) H27C(0.5) C30(0.5) H30A(0.5) H30B(0.5)
 H30C(0.5) C19(0.5) H19A(0.5) H19B(0.5) H19C(0.5) O1(0.5) C31(0.5) H31A(0.5)
 H31B(0.5) H31C(0.5) C32(0.5) H32A(0.5) H32B(0.5) C33(0.5) H33A(0.5) H33B(0.5)
 C34(0.5) H34A(0.5) H34B(0.5) H34C(0.5) O2(0.5) C35(0.5) H35A(0.5) H35B(0.5)
 C36(0.5) H36A(0.5) H36B(0.5) H36C(0.5) C37(0.5) H37A(0.5) H37B(0.5) H37C(0.5)
 C38(0.5) H38A(0.5) H38B(0.5) O3(0.5) O6(0.5) O8(0.5) O10(0.5) O12(0.5)
 O14(0.5) C41(0.5) H41A(0.5) H41B(0.5) C45(0.5) H45A(0.5) H45B(0.5) C46(0.5)
 H46A(0.5) H46B(0.5) C47(0.5) H47A(0.5) H47B(0.5) C48(0.5) H48A(0.5) H48B(0.5)
 C49(0.5) H49A(0.5) H49B(0.5) C50(0.5) H50A(0.5) H50B(0.5) C59(0.5) H59A(0.5)
 H59B(0.5) C60(0.5) H60A(0.5) H60B(0.5) C62(0.5) H62A(0.5) H62B(0.5) C65(0.5)
 H65A(0.5) H65B(0.5) C67(0.5) H67A(0.5) H67B(0.5) O4(0.5) O5(0.5) O7(0.5)
 O9(0.5) O11(0.5) O13(0.5) C39(0.5) H39A(0.5) H39B(0.5) C40(0.5) H40A(0.5)
 H40B(0.5) C51(0.5) H51A(0.5) H51B(0.5) C52(0.5) H52A(0.5) H52B(0.5) C53(0.5)
 H53A(0.5) H53B(0.5) C55(0.5) H55A(0.5) H55B(0.5) C56(0.5) H56A(0.5) H56B(0.5)
 C57(0.5) H57A(0.5) H57B(0.5) C63(0.5) H63A(0.5) H63B(0.5) C64(0.5) H64A(0.5)
 H64B(0.5) C68(0.5) H68A(0.5) H68B(0.5) C69(0.5) H69A(0.5) H69B(0.5) C23A(0.5)
 H23D(0.5) H23E(0.5) H23F(0.5) C24A(0.5) H24D(0.5) H24E(0.5) H24F(0.5)
 Si3A(0.5) C25A(0.5) H25D(0.5) H25E(0.5) H25F(0.5) C27A(0.5) H27D(0.5)
 H27E(0.5) H27F(0.5) Si6A(0.5) C28A(0.5) H28D(0.5) H28E(0.5) H28F(0.5)
 C30A(0.5) H30D(0.5) H30E(0.5) H30F(0.5) N1A(0.5) N2A(0.5) C1A(0.5) H1A(0.5)
 C2A(0.5) H2A(0.5) C3A(0.5) H3A(0.5) C4A(0.5) H4A(0.5) C5A(0.5) C6A(0.5)
 C7A(0.5) H7A(0.5) C8A(0.5) H8A(0.5) C9A(0.5) H9A(0.5) C10A(0.5) H10A(0.5)
6.a Secondary CH2 refined with riding coordinates:
 C32(H32A,H32B), C33(H33A,H33B), C35(H35A,H35B), C38(H38A,H38B), C41(H41A,
 H41B), C45(H45A,H45B), C46(H46A,H46B), C47(H47A,H47B), C48(H48A,H48B),
 C49(H49A,H49B), C50(H50A,H50B), C59(H59A,H59B), C60(H60A,H60B), C62(H62A,H62B),
  C65(H65A,H65B), C67(H67A,H67B), C39(H39A,H39B), C40(H40A,H40B), C51(H51A,
 H51B), C52(H52A,H52B), C53(H53A,H53B), C55(H55A,H55B), C56(H56A,H56B),
 C57(H57A,H57B), C63(H63A,H63B), C64(H64A,H64B), C68(H68A,H68B), C69(H69A,H69B)
6.b Aromatic/amide H refined with riding coordinates:
 C1(H1), C2(H2), C3(H3), C4(H4), C7(H7), C8(H8), C9(H9), C10(H10), C1A(H1A),
 C2A(H2A), C3A(H3A), C4A(H4A), C7A(H7A), C8A(H8A), C9A(H9A), C10A(H10A)
6.c Idealised Me refined as rotating group:
 C16(H16A,H16B,H16C), C17(H17A,H17B,H17C), C18(H18A,H18B,H18C), C21(H21A,H21B,
 H21C), C22(H22A,H22B,H22C), C23(H23A,H23B,H23C), C24(H24A,H24B,H24C), C25(H25A,
 H25B,H25C), C28(H28A,H28B,H28C), C20(H20A,H20B,H20C), C27(H27A,H27B,H27C),
 C30(H30A,H30B,H30C), C19(H19A,H19B,H19C), C31(H31A,H31B,H31C), C34(H34A,H34B,
 H34C), C36(H36A,H36B,H36C), C37(H37A,H37B,H37C), C23A(H23D,H23E,H23F),
 C24A(H24D,H24E,H24F), C25A(H25D,H25E,H25F), C27A(H27D,H27E,H27F), C28A(H28D,
 H28E,H28F), C30A(H30D,H30E,H30F)
;
_atom_sites_solution_hydrogens   geom
_atom_sites_solution_primary     iterative
_atom_sites_solution_secondary   ?
loop_
_atom_site_label
_atom_site_type_symbol
_atom_site_fract_x
_atom_site_fract_y
_atom_site_fract_z
_atom_site_U_iso_or_equiv
_atom_site_adp_type
_atom_site_occupancy
_atom_site_site_symmetry_order
_atom_site_calc_flag
_atom_site_refinement_flags_posn
_atom_site_refinement_flags_adp
_atom_site_refinement_flags_occupancy
_atom_site_disorder_assembly
_atom_site_disorder_group
Zn1 Zn 0.52292(7) 0.74343(4) 0.55188(4) 0.0183(2) Uani 1 1 d D . . . .
Si1 Si 0.7774(2) 0.71645(15) 0.55614(11) 0.0342(5) Uani 1 1 d D . . . .
Si2 Si 0.63034(18) 0.63714(12) 0.46532(10) 0.0218(5) Uani 1 1 d . . . . .
Si3 Si 0.4474(5) 0.8521(3) 0.4548(3) 0.0342(5) Uani 0.5 1 d D U P A 1
N1 N 0.546(4) 0.8117(11) 0.6251(7) 0.0271(14) Uani 0.5 1 d D U P B 1
N2 N 0.482(5) 0.6742(10) 0.6191(7) 0.022(6) Uani 0.5 1 d D U P B 1
N3 N 0.6526(5) 0.7013(4) 0.5184(3) 0.0271(14) Uani 1 1 d . . . . .
N4 N 0.3973(7) 0.7853(4) 0.5027(3) 0.0367(15) Uani 1 1 d D U . . .
C1 C 0.552(2) 0.8861(9) 0.6194(8) 0.024(2) Uani 0.5 1 d D U P B 1
H1 H 0.548878 0.906297 0.581014 0.029 Uiso 0.5 1 calc R U P B 1
C2 C 0.5620(17) 0.9322(9) 0.6669(7) 0.024(3) Uani 0.5 1 d D U P B 1
H2 H 0.567923 0.983286 0.662644 0.029 Uiso 0.5 1 calc R U P B 1
C3 C 0.563(3) 0.8988(11) 0.7217(8) 0.031(3) Uani 0.5 1 d D U P B 1
H3 H 0.584123 0.926196 0.756183 0.038 Uiso 0.5 1 calc R U P B 1
C4 C 0.533(4) 0.8267(11) 0.7273(8) 0.030(6) Uani 0.5 1 d D U P B 1
H4 H 0.521117 0.807822 0.765003 0.036 Uiso 0.5 1 calc R U P B 1
C5 C 0.519(6) 0.7803(13) 0.6766(9) 0.025(7) Uani 0.5 1 d D U P B 1
C16 C 0.4818(7) 0.6239(5) 0.4411(4) 0.035(2) Uani 1 1 d . . . . .
H16A H 0.443879 0.605753 0.474197 0.053 Uiso 1 1 calc GR . . . .
H16B H 0.473941 0.588689 0.408859 0.053 Uiso 1 1 calc GR . . . .
H16C H 0.449204 0.670263 0.427644 0.053 Uiso 1 1 calc GR . . . .
C17 C 0.6948(10) 0.6595(6) 0.3957(4) 0.047(3) Uani 1 1 d . . . . .
H17A H 0.657565 0.701752 0.376758 0.071 Uiso 1 1 calc GR . . . .
H17B H 0.687131 0.617966 0.368836 0.071 Uiso 1 1 calc GR . . . .
H17C H 0.773062 0.670556 0.405172 0.071 Uiso 1 1 calc GR . . . .
C18 C 0.6814(8) 0.5451(5) 0.4889(4) 0.035(2) Uani 1 1 d . . . . .
H18A H 0.760299 0.547656 0.501801 0.052 Uiso 1 1 calc GR . . . .
H18B H 0.669311 0.511288 0.455827 0.052 Uiso 1 1 calc GR . . . .
H18C H 0.641312 0.528094 0.521564 0.052 Uiso 1 1 calc GR . . . .
C21 C 0.7870(10) 0.6798(7) 0.6318(6) 0.069(3) Uani 1 1 d . . . . .
H21A H 0.736290 0.706212 0.654919 0.103 Uiso 1 1 calc GR . . . .
H21B H 0.862582 0.685419 0.650100 0.103 Uiso 1 1 calc GR . . . .
H21C H 0.767362 0.628214 0.630532 0.103 Uiso 1 1 calc GR . . . .
C22 C 0.8148(10) 0.8146(7) 0.5621(6) 0.069(3) Uani 1 1 d . . . . .
H22A H 0.810682 0.836044 0.522629 0.103 Uiso 1 1 calc GR . . . .
H22B H 0.889898 0.819555 0.581071 0.103 Uiso 1 1 calc GR . . . .
H22C H 0.763292 0.839740 0.585592 0.103 Uiso 1 1 calc GR . . . .
C23 C 0.5977(17) 0.8629(14) 0.4567(11) 0.058(3) Uani 0.5 1 d D U P A 1
H23A H 0.626139 0.884116 0.494521 0.087 Uiso 0.5 1 calc GR . P A 1
H23B H 0.615156 0.894963 0.424655 0.087 Uiso 0.5 1 calc GR . P A 1
H23C H 0.631912 0.815404 0.452084 0.087 Uiso 0.5 1 calc GR . P A 1
C24 C 0.400(2) 0.8158(11) 0.3761(8) 0.058(3) Uani 0.5 1 d D U P A 1
H24A H 0.454304 0.781343 0.363812 0.087 Uiso 0.5 1 calc GR . P A 1
H24B H 0.392354 0.856432 0.348342 0.087 Uiso 0.5 1 calc GR . P A 1
H24C H 0.328376 0.791337 0.376641 0.087 Uiso 0.5 1 calc GR . P A 1
C25 C 0.380(2) 0.9412(11) 0.4573(10) 0.058(3) Uani 0.5 1 d D U P A 1
H25A H 0.303252 0.937305 0.440114 0.087 Uiso 0.5 1 calc GR . P A 1
H25B H 0.419042 0.976485 0.434804 0.087 Uiso 0.5 1 calc GR . P A 1
H25C H 0.381136 0.957388 0.498243 0.087 Uiso 0.5 1 calc GR . P A 1
C28 C 0.2326(19) 0.7976(14) 0.5885(9) 0.039(6) Uani 0.5 1 d D U P A -2
H28A H 0.283004 0.776864 0.620080 0.059 Uiso 0.5 1 calc GR . P A -2
H28B H 0.156511 0.785225 0.595059 0.059 Uiso 0.5 1 calc GR . P A -2
H28C H 0.240987 0.850450 0.588230 0.059 Uiso 0.5 1 calc GR . P A -2
Si6 Si 0.2654(9) 0.7599(8) 0.5162(6) 0.049(2) Uani 0.5 1 d D U P A -2
C6 C 0.4782(19) 0.7082(9) 0.6744(7) 0.024(3) Uani 0.5 1 d D U P B 1
C7 C 0.4353(15) 0.6668(8) 0.7190(7) 0.024(2) Uani 0.5 1 d D U P B 1
H7 H 0.428774 0.689217 0.755930 0.029 Uiso 0.5 1 calc R U P B 1
C8 C 0.4028(14) 0.5962(8) 0.7118(6) 0.026(3) Uani 0.5 1 d D U P B 1
H8 H 0.372854 0.570490 0.742699 0.031 Uiso 0.5 1 calc R U P B 1
C9 C 0.4147(16) 0.5625(8) 0.6574(6) 0.028(3) Uani 0.5 1 d D U P B 1
H9 H 0.399333 0.512427 0.651221 0.034 Uiso 0.5 1 calc R U P B 1
C10 C 0.4494(16) 0.6050(9) 0.6140(7) 0.024(2) Uani 0.5 1 d D U P B 1
H10 H 0.450797 0.583362 0.576354 0.029 Uiso 0.5 1 calc R U P B 1
C20 C 0.8976(15) 0.6561(13) 0.5361(13) 0.050(6) Uani 0.5 1 d D . P C 1
H20A H 0.964930 0.669554 0.560611 0.075 Uiso 0.5 1 calc GR . P C 1
H20B H 0.908818 0.663004 0.494557 0.075 Uiso 0.5 1 calc GR . P C 1
H20C H 0.880125 0.605136 0.543087 0.075 Uiso 0.5 1 calc GR . P C 1
C27 C 0.242(2) 0.6590(11) 0.5179(11) 0.055(3) Uani 0.5 1 d D U P A -2
H27A H 0.270060 0.636576 0.483487 0.083 Uiso 0.5 1 calc GR . P A -2
H27B H 0.162338 0.649332 0.517156 0.083 Uiso 0.5 1 calc GR . P A -2
H27C H 0.279694 0.638654 0.553872 0.083 Uiso 0.5 1 calc GR . P A -2
C30 C 0.150(2) 0.7888(19) 0.4622(12) 0.075(7) Uani 0.5 1 d D U P A -2
H30A H 0.148840 0.841819 0.459253 0.112 Uiso 0.5 1 calc GR . P A -2
H30B H 0.079822 0.771893 0.475240 0.112 Uiso 0.5 1 calc GR . P A -2
H30C H 0.159646 0.767853 0.423561 0.112 Uiso 0.5 1 calc GR . P A -2
C19 C 0.8961(15) 0.6954(15) 0.5093(9) 0.044(6) Uani 0.5 1 d D . P C 2
H19A H 0.904742 0.642747 0.506105 0.066 Uiso 0.5 1 calc GR . P C 2
H19B H 0.964501 0.716559 0.527877 0.066 Uiso 0.5 1 calc GR . P C 2
H19C H 0.879727 0.716175 0.469899 0.066 Uiso 0.5 1 calc GR . P C 2
K1 K 0.92675(19) 0.55532(12) 0.72855(10) 0.0407(5) Uani 1 1 d . . . . .
O1 O 1.0222(17) 0.4912(16) 0.8351(10) 0.119(8) Uani 0.5 1 d D U P D 1
C31 C 0.923(2) 0.511(2) 0.9226(16) 0.117(6) Uani 0.5 1 d D U P D 1
H31A H 0.883298 0.540135 0.891193 0.175 Uiso 0.5 1 calc GR . P D 1
H31B H 0.945968 0.543064 0.955994 0.175 Uiso 0.5 1 calc GR . P D 1
H31C H 0.874096 0.473418 0.935309 0.175 Uiso 0.5 1 calc GR . P D 1
C32 C 1.011(3) 0.481(3) 0.9026(15) 0.117(6) Uani 0.5 1 d D U P D 1
H32A H 1.010028 0.428452 0.911173 0.140 Uiso 0.5 1 calc R . P D 1
H32B H 1.077874 0.501548 0.924751 0.140 Uiso 0.5 1 calc R . P D 1
C33 C 1.133(3) 0.460(2) 0.8176(18) 0.117(6) Uani 0.5 1 d D U P D 1
H33A H 1.187892 0.499401 0.817831 0.140 Uiso 0.5 1 calc R . P D 1
H33B H 1.161262 0.423739 0.847633 0.140 Uiso 0.5 1 calc R . P D 1
C34 C 1.125(3) 0.427(2) 0.7638(16) 0.117(6) Uani 0.5 1 d D U P D 1
H34A H 1.054356 0.440342 0.742206 0.175 Uiso 0.5 1 calc GR . P D 1
H34B H 1.128773 0.374467 0.768745 0.175 Uiso 0.5 1 calc GR . P D 1
H34C H 1.185461 0.443560 0.741727 0.175 Uiso 0.5 1 calc GR . P D 1
O2 O 1.0543(15) 0.4670(8) 0.7976(7) 0.057(4) Uani 0.5 1 d D U P D 2
C35 C 1.115(3) 0.4842(16) 0.8523(12) 0.077(5) Uani 0.5 1 d D U P D 2
H35A H 1.163892 0.442610 0.864095 0.093 Uiso 0.5 1 calc R . P D 2
H35B H 1.163537 0.526203 0.845966 0.093 Uiso 0.5 1 calc R . P D 2
C36 C 1.059(3) 0.499(2) 0.8948(13) 0.099(11) Uani 0.5 1 d D U P D 2
H36A H 1.035667 0.550085 0.892130 0.149 Uiso 0.5 1 calc GR . P D 2
H36B H 1.103493 0.491068 0.932196 0.149 Uiso 0.5 1 calc GR . P D 2
H36C H 0.993499 0.467912 0.892794 0.149 Uiso 0.5 1 calc GR . P D 2
C37 C 1.138(2) 0.3572(12) 0.7656(11) 0.059(5) Uani 0.5 1 d D U P D 2
H37A H 1.205398 0.344102 0.790508 0.088 Uiso 0.5 1 calc GR . P D 2
H37B H 1.158291 0.386458 0.732296 0.088 Uiso 0.5 1 calc GR . P D 2
H37C H 1.100618 0.313048 0.750824 0.088 Uiso 0.5 1 calc GR . P D 2
C38 C 1.078(3) 0.3919(13) 0.7940(12) 0.077(5) Uani 0.5 1 d D U P D 2
H38A H 1.101308 0.377906 0.835242 0.093 Uiso 0.5 1 calc R . P D 2
H38B H 1.005055 0.369132 0.784628 0.093 Uiso 0.5 1 calc R . P D 2
O3 O 0.7378(15) 0.4827(9) 0.7293(8) 0.0751(14) Uani 0.5 1 d D U P D 3
O6 O 0.8902(13) 0.4267(10) 0.6617(8) 0.0751(14) Uani 0.5 1 d D U P D 3
O8 O 1.0683(13) 0.5212(9) 0.6451(8) 0.0751(14) Uani 0.5 1 d D U P D 3
O10 O 1.1250(15) 0.6298(9) 0.7233(8) 0.0751(14) Uani 0.5 1 d D U P D 3
O12 O 0.9665(14) 0.6872(13) 0.7882(9) 0.0751(14) Uani 0.5 1 d D U P D 3
O14 O 0.7843(14) 0.6003(9) 0.8047(8) 0.0751(14) Uani 0.5 1 d D U P D 3
C41 C 0.914(2) 0.6950(19) 0.8403(11) 0.087(3) Uani 0.5 1 d D U P D 3
H41A H 0.918088 0.746056 0.853717 0.104 Uiso 0.5 1 calc R . P D 3
H41B H 0.950740 0.664068 0.871786 0.104 Uiso 0.5 1 calc R . P D 3
C45 C 1.0762(15) 0.7115(13) 0.7968(9) 0.057(5) Uani 0.5 1 d D U P D 3
H45A H 1.115883 0.683899 0.829454 0.069 Uiso 0.5 1 calc R . P D 3
H45B H 1.077130 0.763406 0.808083 0.069 Uiso 0.5 1 calc R . P D 3
C46 C 1.134(2) 0.7022(12) 0.7422(11) 0.056(5) Uani 0.5 1 d D U P D 3
H46A H 1.100456 0.734615 0.710839 0.068 Uiso 0.5 1 calc R . P D 3
H46B H 1.212583 0.715383 0.750305 0.068 Uiso 0.5 1 calc R . P D 3
C47 C 1.190(2) 0.6172(11) 0.6773(11) 0.073(6) Uani 0.5 1 d D U P D 3
H47A H 1.267577 0.629064 0.690220 0.087 Uiso 0.5 1 calc R . P D 3
H47B H 1.165367 0.649113 0.643662 0.087 Uiso 0.5 1 calc R . P D 3
C48 C 1.1815(14) 0.5381(9) 0.6577(9) 0.052(4) Uani 0.5 1 d D U P D 3
H48A H 1.221002 0.530839 0.622165 0.063 Uiso 0.5 1 calc R . P D 3
H48B H 1.215099 0.506070 0.689265 0.063 Uiso 0.5 1 calc R . P D 3
C49 C 1.0609(18) 0.4500(12) 0.6215(13) 0.084(7) Uani 0.5 1 d D U P D 3
H49A H 1.095695 0.414867 0.650349 0.101 Uiso 0.5 1 calc R . P D 3
H49B H 1.099194 0.447360 0.585223 0.101 Uiso 0.5 1 calc R . P D 3
C50 C 0.940(2) 0.433(2) 0.6080(11) 0.087(3) Uani 0.5 1 d D U P D 3
H50A H 0.903032 0.471759 0.583487 0.104 Uiso 0.5 1 calc R . P D 3
H50B H 0.930812 0.386653 0.585771 0.104 Uiso 0.5 1 calc R . P D 3
C59 C 0.7935(17) 0.6718(12) 0.8265(13) 0.087(3) Uani 0.5 1 d D U P D 3
H59A H 0.755108 0.675335 0.862697 0.104 Uiso 0.5 1 calc R . P D 3
H59B H 0.756697 0.705356 0.796979 0.104 Uiso 0.5 1 calc R . P D 3
C60 C 0.6757(16) 0.5820(12) 0.7858(13) 0.083(7) Uani 0.5 1 d D U P D 3
H60A H 0.650284 0.611080 0.750605 0.099 Uiso 0.5 1 calc R . P D 3
H60B H 0.627589 0.593374 0.817152 0.099 Uiso 0.5 1 calc R . P D 3
C62 C 0.667(2) 0.5015(13) 0.7708(13) 0.095(8) Uani 0.5 1 d D U P D 3
H62A H 0.685414 0.472670 0.806983 0.113 Uiso 0.5 1 calc R . P D 3
H62B H 0.590525 0.489950 0.755460 0.113 Uiso 0.5 1 calc R . P D 3
C65 C 0.725(3) 0.4111(14) 0.7094(14) 0.068(7) Uani 0.5 1 d D U P D 3
H65A H 0.645725 0.399034 0.702060 0.081 Uiso 0.5 1 calc R . P D 3
H65B H 0.759135 0.377186 0.739466 0.081 Uiso 0.5 1 calc R . P D 3
C67 C 0.7807(17) 0.4040(16) 0.6527(10) 0.070(6) Uani 0.5 1 d D U P D 3
H67A H 0.777847 0.352845 0.639460 0.084 Uiso 0.5 1 calc R . P D 3
H67B H 0.740913 0.433941 0.621557 0.084 Uiso 0.5 1 calc R . P D 3
O4 O 0.7481(16) 0.5023(9) 0.7839(7) 0.0751(14) Uani 0.5 1 d D U P D 4
O5 O 0.8211(14) 0.4213(11) 0.6895(7) 0.0751(14) Uani 0.5 1 d D U P D 4
O7 O 0.9665(13) 0.4808(9) 0.6186(8) 0.0751(14) Uani 0.5 1 d D U P D 4
O9 O 1.1073(16) 0.5918(9) 0.6618(7) 0.0751(14) Uani 0.5 1 d D U P D 4
O11 O 1.0326(14) 0.6839(10) 0.7466(7) 0.0751(14) Uani 0.5 1 d D U P D 4
O13 O 0.8683(14) 0.6249(9) 0.8208(8) 0.0751(14) Uani 0.5 1 d D U P D 4
C39 C 0.739(3) 0.5345(12) 0.8367(10) 0.087(3) Uani 0.5 1 d D U P D 4
H39A H 0.781761 0.505932 0.867528 0.104 Uiso 0.5 1 calc R . P D 4
H39B H 0.660310 0.532133 0.844931 0.104 Uiso 0.5 1 calc R . P D 4
C40 C 0.774(2) 0.6087(12) 0.8416(13) 0.087(3) Uani 0.5 1 d D U P D 4
H40A H 0.715711 0.639353 0.821136 0.104 Uiso 0.5 1 calc R . P D 4
H40B H 0.779666 0.622233 0.883791 0.104 Uiso 0.5 1 calc R . P D 4
C51 C 1.0676(19) 0.4886(12) 0.6012(13) 0.081(7) Uani 0.5 1 d D U P D 4
H51A H 1.067217 0.474112 0.559431 0.097 Uiso 0.5 1 calc R . P D 4
H51B H 1.119862 0.456728 0.624974 0.097 Uiso 0.5 1 calc R . P D 4
C52 C 1.102(2) 0.5628(12) 0.6081(9) 0.077(6) Uani 0.5 1 d D U P D 4
H52A H 1.176590 0.566907 0.594034 0.092 Uiso 0.5 1 calc R . P D 4
H52B H 1.051908 0.592921 0.581716 0.092 Uiso 0.5 1 calc R . P D 4
C53 C 1.136(3) 0.6608(12) 0.6675(10) 0.086(7) Uani 0.5 1 d D U P D 4
H53A H 1.088721 0.689307 0.638242 0.103 Uiso 0.5 1 calc R . P D 4
H53B H 1.212824 0.665772 0.657511 0.103 Uiso 0.5 1 calc R . P D 4
C55 C 1.129(2) 0.6931(16) 0.7251(12) 0.067(7) Uani 0.5 1 d D U P D 4
H55A H 1.187002 0.672011 0.753073 0.080 Uiso 0.5 1 calc R . P D 4
H55B H 1.143093 0.745779 0.722509 0.080 Uiso 0.5 1 calc R . P D 4
C56 C 1.004(2) 0.7049(17) 0.7975(11) 0.080(7) Uani 0.5 1 d D U P D 4
H56A H 1.020600 0.757387 0.800966 0.096 Uiso 0.5 1 calc R . P D 4
H56B H 1.054187 0.680171 0.827989 0.096 Uiso 0.5 1 calc R . P D 4
C57 C 0.894(2) 0.6946(12) 0.8129(16) 0.102(8) Uani 0.5 1 d D U P D 4
H57A H 0.884522 0.721650 0.849541 0.122 Uiso 0.5 1 calc R . P D 4
H57B H 0.841634 0.715132 0.781341 0.122 Uiso 0.5 1 calc R . P D 4
C63 C 0.737(2) 0.4322(11) 0.7785(10) 0.077(6) Uani 0.5 1 d D U P D 4
H63A H 0.668133 0.417517 0.794906 0.092 Uiso 0.5 1 calc R . P D 4
H63B H 0.799025 0.408593 0.802572 0.092 Uiso 0.5 1 calc R . P D 4
C64 C 0.735(3) 0.4053(19) 0.7191(13) 0.076(8) Uani 0.5 1 d D U P D 4
H64A H 0.727294 0.351866 0.720300 0.091 Uiso 0.5 1 calc R . P D 4
H64B H 0.667540 0.424491 0.696547 0.091 Uiso 0.5 1 calc R . P D 4
C68 C 0.815(2) 0.4070(18) 0.6329(9) 0.082(7) Uani 0.5 1 d D U P D 4
H68A H 0.758425 0.438383 0.612238 0.098 Uiso 0.5 1 calc R . P D 4
H68B H 0.791630 0.356004 0.626623 0.098 Uiso 0.5 1 calc R . P D 4
C69 C 0.918(2) 0.4174(13) 0.6069(10) 0.064(5) Uani 0.5 1 d D U P D 4
H69A H 0.969264 0.378272 0.620773 0.076 Uiso 0.5 1 calc R . P D 4
H69B H 0.903055 0.412470 0.563648 0.076 Uiso 0.5 1 calc R . P D 4
C23A C 0.347(2) 0.9376(11) 0.4747(10) 0.058(3) Uani 0.5 1 d D . P A 2
H23D H 0.267849 0.932980 0.478513 0.087 Uiso 0.5 1 calc GR . P A 2
H23E H 0.358994 0.974975 0.445474 0.087 Uiso 0.5 1 calc GR . P A 2
H23F H 0.385121 0.951426 0.512824 0.087 Uiso 0.5 1 calc GR . P A 2
C24A C 0.5579(18) 0.8689(14) 0.4442(11) 0.058(3) Uani 0.5 1 d D . P A 2
H24D H 0.592734 0.883638 0.482828 0.087 Uiso 0.5 1 calc GR . P A 2
H24E H 0.563964 0.908422 0.415952 0.087 Uiso 0.5 1 calc GR . P A 2
H24F H 0.594908 0.825657 0.430778 0.087 Uiso 0.5 1 calc GR . P A 2
Si3A Si 0.4031(4) 0.8473(3) 0.4503(3) 0.0342(5) Uani 0.5 1 d D . P A 2
C25A C 0.346(2) 0.8328(12) 0.3736(8) 0.058(3) Uani 0.5 1 d D . P A 2
H25D H 0.377255 0.788338 0.358418 0.087 Uiso 0.5 1 calc GR . P A 2
H25E H 0.365285 0.874163 0.349477 0.087 Uiso 0.5 1 calc GR . P A 2
H25F H 0.265911 0.828355 0.371943 0.087 Uiso 0.5 1 calc GR . P A 2
C27A C 0.242(2) 0.6727(11) 0.5345(11) 0.055(3) Uani 0.5 1 d D . P A -1
H27D H 0.250706 0.648640 0.496909 0.083 Uiso 0.5 1 calc GR . P A -1
H27E H 0.166234 0.665731 0.544682 0.083 Uiso 0.5 1 calc GR . P A -1
H27F H 0.293610 0.651742 0.565319 0.083 Uiso 0.5 1 calc GR . P A -1
Si6A Si 0.2706(9) 0.7731(9) 0.5276(6) 0.049(2) Uani 0.5 1 d D . P A -1
C28A C 0.2644(19) 0.8178(13) 0.6018(9) 0.037(6) Uani 0.5 1 d D . P A -1
H28D H 0.318564 0.795025 0.630568 0.056 Uiso 0.5 1 calc GR . P A -1
H28E H 0.190436 0.811834 0.614566 0.056 Uiso 0.5 1 calc GR . P A -1
H28F H 0.281153 0.869531 0.598708 0.056 Uiso 0.5 1 calc GR . P A -1
C30A C 0.147(2) 0.8032(19) 0.4799(12) 0.075(7) Uani 0.5 1 d D . P A -1
H30D H 0.153581 0.855188 0.471675 0.112 Uiso 0.5 1 calc GR . P A -1
H30E H 0.081144 0.794400 0.499981 0.112 Uiso 0.5 1 calc GR . P A -1
H30F H 0.142598 0.776090 0.442842 0.112 Uiso 0.5 1 calc GR . P A -1
N1A N 0.544(5) 0.8122(10) 0.6250(6) 0.0367(15) Uani 0.5 1 d D U P B 2
N2A N 0.499(5) 0.6713(10) 0.6196(7) 0.018(6) Uani 0.5 1 d D U P B 2
C1A C 0.5800(16) 0.8818(9) 0.6306(8) 0.028(4) Uani 0.5 1 d D U P B 2
H1A H 0.601739 0.904766 0.596296 0.034 Uiso 0.5 1 calc R U P B 2
C2A C 0.5878(17) 0.9220(9) 0.6816(7) 0.024(3) Uani 0.5 1 d D U P B 2
H2A H 0.606328 0.972056 0.680815 0.029 Uiso 0.5 1 calc R U P B 2
C3A C 0.568(4) 0.8888(11) 0.7343(8) 0.031(3) Uani 0.5 1 d D U P B 2
H3A H 0.569120 0.915775 0.769800 0.038 Uiso 0.5 1 calc R U P B 2
C4A C 0.548(4) 0.8152(12) 0.7330(8) 0.032(6) Uani 0.5 1 d D U P B 2
H4A H 0.542443 0.789212 0.768508 0.038 Uiso 0.5 1 calc R U P B 2
C5A C 0.536(6) 0.7782(12) 0.6776(7) 0.022(6) Uani 0.5 1 d D U P B 2
C6A C 0.5137(16) 0.7035(8) 0.6752(6) 0.024(5) Uani 0.5 1 d D U P B 2
C7A C 0.5118(17) 0.6618(8) 0.7261(6) 0.031(4) Uani 0.5 1 d D U P B 2
H7A H 0.517537 0.684368 0.763655 0.037 Uiso 0.5 1 calc R U P B 2
C8A C 0.5016(15) 0.5885(8) 0.7215(6) 0.028(3) Uani 0.5 1 d D U P B 2
H8A H 0.500799 0.559256 0.755692 0.034 Uiso 0.5 1 calc R U P B 2
C9A C 0.4922(15) 0.5568(8) 0.6654(6) 0.024(3) Uani 0.5 1 d D U P B 2
H9A H 0.485169 0.505643 0.661303 0.028 Uiso 0.5 1 calc R U P B 2
C10A C 0.4932(14) 0.5993(7) 0.6171(6) 0.019(4) Uani 0.5 1 d D U P B 2
H10A H 0.489403 0.576615 0.579562 0.023 Uiso 0.5 1 calc R U P B 2

loop_
_atom_site_aniso_label
_atom_site_aniso_U_11
_atom_site_aniso_U_22
_atom_site_aniso_U_33
_atom_site_aniso_U_23
_atom_site_aniso_U_13
_atom_site_aniso_U_12
Zn1 0.0255(5) 0.0109(4) 0.0204(4) -0.0023(4) 0.0110(3) -0.0028(4)
Si1 0.0285(13) 0.0410(12) 0.0335(11) -0.0175(9) 0.0052(10) -0.0049(11)
Si2 0.0263(12) 0.0177(11) 0.0217(11) -0.0086(9) 0.0048(9) -0.0028(9)
Si3 0.0285(13) 0.0410(12) 0.0335(11) -0.0175(9) 0.0052(10) -0.0049(11)
N1 0.023(3) 0.025(3) 0.037(4) -0.018(3) 0.017(3) -0.011(3)
N2 0.026(16) 0.022(6) 0.020(7) -0.002(5) 0.003(7) 0.002(7)
N3 0.023(3) 0.025(3) 0.037(4) -0.018(3) 0.017(3) -0.011(3)
N4 0.052(4) 0.032(3) 0.028(3) 0.002(3) 0.014(3) 0.018(3)
C1 0.029(6) 0.026(3) 0.019(4) -0.007(3) 0.006(4) -0.001(4)
C2 0.024(7) 0.022(4) 0.026(5) -0.006(3) 0.000(4) 0.008(4)
C3 0.044(6) 0.028(5) 0.020(5) -0.012(4) -0.007(6) 0.008(5)
C4 0.043(14) 0.025(7) 0.020(7) -0.001(5) -0.008(8) 0.018(8)
C5 0.023(17) 0.022(6) 0.031(7) -0.008(5) 0.008(8) 0.007(7)
C16 0.029(5) 0.028(5) 0.045(6) -0.009(4) -0.015(4) 0.001(4)
C17 0.071(8) 0.039(6) 0.035(6) -0.006(5) 0.022(5) -0.005(5)
C18 0.041(5) 0.028(5) 0.035(5) -0.008(4) -0.001(4) 0.010(4)
C21 0.053(5) 0.072(6) 0.077(6) -0.015(5) -0.019(5) -0.025(5)
C22 0.053(5) 0.072(6) 0.077(6) -0.015(5) -0.019(5) -0.025(5)
C23 0.110(10) 0.033(4) 0.036(5) 0.019(4) 0.033(6) 0.025(5)
C24 0.110(10) 0.033(4) 0.036(5) 0.019(4) 0.033(6) 0.025(5)
C25 0.110(10) 0.033(4) 0.036(5) 0.019(4) 0.033(6) 0.025(5)
C28 0.026(11) 0.040(12) 0.052(11) 0.001(9) 0.006(8) -0.010(9)
Si6 0.0417(18) 0.078(5) 0.027(5) -0.001(3) 0.006(2) 0.035(2)
C6 0.024(7) 0.022(4) 0.026(5) -0.006(3) 0.000(4) 0.008(4)
C7 0.029(6) 0.026(3) 0.019(4) -0.007(3) 0.006(4) -0.001(4)
C8 0.034(9) 0.026(6) 0.019(6) 0.005(5) 0.009(6) 0.000(6)
C9 0.037(9) 0.021(7) 0.026(6) -0.003(5) 0.006(6) -0.008(7)
C10 0.029(6) 0.026(3) 0.019(4) -0.007(3) 0.006(4) -0.001(4)
C20 0.017(10) 0.047(14) 0.08(2) -0.019(13) 0.001(11) 0.007(10)
C27 0.055(3) 0.056(3) 0.055(3) 0.0000(2) 0.0053(4) 0.0000(2)
C30 0.068(8) 0.097(13) 0.058(13) -0.008(11) -0.002(9) 0.040(9)
C19 0.025(11) 0.075(18) 0.034(12) -0.019(11) 0.010(9) 0.000(11)
K1 0.0474(13) 0.0373(12) 0.0393(12) -0.0079(9) 0.0140(10) 0.0059(10)
O1 0.046(10) 0.19(2) 0.127(14) 0.054(16) 0.012(11) 0.001(12)
C31 0.060(9) 0.165(16) 0.128(13) 0.048(13) 0.024(10) -0.004(10)
C32 0.060(9) 0.165(16) 0.128(13) 0.048(13) 0.024(10) -0.004(10)
C33 0.060(9) 0.165(16) 0.128(13) 0.048(13) 0.024(10) -0.004(10)
C34 0.060(9) 0.165(16) 0.128(13) 0.048(13) 0.024(10) -0.004(10)
O2 0.056(10) 0.050(8) 0.062(8) 0.009(7) -0.009(7) 0.003(7)
C35 0.100(13) 0.056(8) 0.070(9) 0.011(8) -0.021(8) 0.013(8)
C36 0.078(18) 0.12(3) 0.090(14) -0.061(17) -0.026(12) -0.033(16)
C37 0.062(14) 0.041(11) 0.069(14) 0.020(10) -0.016(10) -0.008(9)
C38 0.100(13) 0.056(8) 0.070(9) 0.011(8) -0.021(8) 0.013(8)
O3 0.074(3) 0.078(3) 0.078(3) -0.025(3) 0.030(3) -0.009(3)
O6 0.074(3) 0.078(3) 0.078(3) -0.025(3) 0.030(3) -0.009(3)
O8 0.074(3) 0.078(3) 0.078(3) -0.025(3) 0.030(3) -0.009(3)
O10 0.074(3) 0.078(3) 0.078(3) -0.025(3) 0.030(3) -0.009(3)
O12 0.074(3) 0.078(3) 0.078(3) -0.025(3) 0.030(3) -0.009(3)
O14 0.074(3) 0.078(3) 0.078(3) -0.025(3) 0.030(3) -0.009(3)
C41 0.099(6) 0.086(7) 0.082(6) -0.039(6) 0.045(5) -0.013(6)
C45 0.075(9) 0.049(11) 0.047(10) -0.011(8) 0.001(8) -0.035(9)
C46 0.053(11) 0.065(9) 0.048(11) -0.009(9) -0.014(8) -0.004(10)
C47 0.064(13) 0.052(10) 0.112(14) 0.003(10) 0.059(11) 0.002(9)
C48 0.057(7) 0.049(9) 0.057(11) 0.017(8) 0.038(8) 0.008(7)
C49 0.098(10) 0.077(11) 0.083(16) -0.029(12) 0.045(11) -0.007(10)
C50 0.099(6) 0.086(7) 0.082(6) -0.039(6) 0.045(5) -0.013(6)
C59 0.099(6) 0.086(7) 0.082(6) -0.039(6) 0.045(5) -0.013(6)
C60 0.070(9) 0.099(13) 0.083(16) -0.022(12) 0.027(10) -0.008(10)
C62 0.068(14) 0.113(14) 0.110(16) -0.047(13) 0.045(12) -0.041(11)
C65 0.057(14) 0.069(10) 0.075(14) -0.005(11) -0.002(11) -0.010(11)
C67 0.087(9) 0.052(13) 0.069(13) -0.022(11) 0.007(9) -0.020(10)
O4 0.074(3) 0.078(3) 0.078(3) -0.025(3) 0.030(3) -0.009(3)
O5 0.074(3) 0.078(3) 0.078(3) -0.025(3) 0.030(3) -0.009(3)
O7 0.074(3) 0.078(3) 0.078(3) -0.025(3) 0.030(3) -0.009(3)
O9 0.074(3) 0.078(3) 0.078(3) -0.025(3) 0.030(3) -0.009(3)
O11 0.074(3) 0.078(3) 0.078(3) -0.025(3) 0.030(3) -0.009(3)
O13 0.074(3) 0.078(3) 0.078(3) -0.025(3) 0.030(3) -0.009(3)
C39 0.099(6) 0.086(7) 0.082(6) -0.039(6) 0.045(5) -0.013(6)
C40 0.099(6) 0.086(7) 0.082(6) -0.039(6) 0.045(5) -0.013(6)
C51 0.089(10) 0.083(13) 0.077(16) -0.029(12) 0.047(12) -0.007(10)
C52 0.070(14) 0.083(12) 0.083(10) -0.028(10) 0.042(11) -0.005(10)
C53 0.101(17) 0.080(9) 0.083(14) -0.016(10) 0.036(12) -0.022(11)
C55 0.069(11) 0.057(14) 0.077(15) -0.012(10) 0.023(12) -0.015(11)
C56 0.104(15) 0.072(15) 0.072(11) 0.011(11) 0.048(13) 0.031(11)
C57 0.113(16) 0.072(9) 0.13(2) 0.012(15) 0.071(15) 0.022(10)
C63 0.048(13) 0.091(8) 0.093(12) -0.026(10) 0.014(11) -0.005(10)
C64 0.058(13) 0.068(15) 0.102(13) -0.027(11) 0.013(12) -0.033(13)
C68 0.090(14) 0.069(15) 0.087(8) -0.028(11) 0.017(10) -0.004(11)
C69 0.085(12) 0.065(10) 0.039(10) -0.019(10) -0.003(9) 0.003(9)
C23A 0.110(10) 0.033(4) 0.036(5) 0.019(4) 0.033(6) 0.025(5)
C24A 0.110(10) 0.033(4) 0.036(5) 0.019(4) 0.033(6) 0.025(5)
Si3A 0.0285(13) 0.0410(12) 0.0335(11) -0.0175(9) 0.0052(10) -0.0049(11)
C25A 0.110(10) 0.033(4) 0.036(5) 0.019(4) 0.033(6) 0.025(5)
C27A 0.055(3) 0.056(3) 0.055(3) 0.0000(2) 0.0053(4) 0.0000(2)
Si6A 0.0417(18) 0.078(5) 0.027(5) -0.001(3) 0.006(2) 0.035(2)
C28A 0.034(15) 0.037(14) 0.045(14) 0.004(10) 0.026(12) 0.008(11)
C30A 0.068(8) 0.097(13) 0.058(13) -0.008(11) -0.002(9) 0.040(9)
N1A 0.052(4) 0.032(3) 0.028(3) 0.002(3) 0.014(3) 0.018(3)
N2A 0.026(17) 0.018(6) 0.010(6) -0.002(5) 0.005(7) -0.005(7)
C1A 0.022(11) 0.034(6) 0.030(7) -0.009(5) 0.012(7) 0.003(6)
C2A 0.024(7) 0.022(4) 0.026(5) -0.006(3) 0.000(4) 0.008(4)
C3A 0.044(6) 0.028(5) 0.020(5) -0.012(4) -0.007(6) 0.008(5)
C4A 0.049(16) 0.024(7) 0.021(7) -0.008(6) -0.008(9) 0.014(9)
C5A 0.024(18) 0.022(6) 0.019(6) -0.008(4) -0.005(6) 0.009(7)
C6A 0.035(13) 0.024(5) 0.012(6) -0.007(4) 0.005(6) 0.008(6)
C7A 0.050(10) 0.025(6) 0.017(6) -0.005(5) 0.001(7) -0.007(7)
C8A 0.037(9) 0.025(6) 0.022(6) -0.002(5) 0.007(6) -0.005(6)
C9A 0.033(9) 0.016(6) 0.024(6) 0.000(4) 0.009(6) -0.003(6)
C10A 0.021(9) 0.019(6) 0.019(6) -0.004(5) 0.009(6) 0.001(6)

_geom_special_details            
;
 All esds (except the esd in the dihedral angle between two l.s. planes)
 are estimated using the full covariance matrix.  The cell esds are taken
 into account individually in the estimation of esds in distances, angles
 and torsion angles; correlations between esds in cell parameters are only
 used when they are defined by crystal symmetry.  An approximate (isotropic)
 treatment of cell esds is used for estimating esds involving l.s. planes.
;
loop_
_geom_bond_atom_site_label_1
_geom_bond_atom_site_label_2
_geom_bond_distance
_geom_bond_site_symmetry_2
_geom_bond_publ_flag
Zn1 N1 2.090(11) . ?
Zn1 N2 2.095(12) . ?
Zn1 N3 1.979(6) . ?
Zn1 N4 1.969(8) . ?
Zn1 N1A 2.092(12) . ?
Zn1 N2A 2.079(11) . ?
Si1 N3 1.699(7) . ?
Si1 C21 1.848(14) . ?
Si1 C22 1.868(13) . ?
Si1 C20 1.928(15) . ?
Si1 C19 1.919(15) . ?
Si2 N3 1.696(7) . ?
Si2 C16 1.859(9) . ?
Si2 C17 1.885(9) . ?
Si2 C18 1.869(9) . ?
Si3 N4 1.792(10) . ?
Si3 C23 1.84(2) . ?
Si3 C24 1.95(2) . ?
Si3 C25 1.843(19) . ?
N1 C1 1.379(19) . ?
N1 C5 1.379(15) . ?
N2 C6 1.413(15) . ?
N2 C10 1.336(17) . ?
N4 Si6 1.730(13) . ?
N4 Si3A 1.661(9) . ?
N4 Si6A 1.711(13) . ?
C1 H1 0.9500 . ?
C1 C2 1.374(16) . ?
C2 H2 0.9500 . ?
C2 C3 1.394(18) . ?
C3 H3 0.9500 . ?
C3 C4 1.389(18) . ?
C4 H4 0.9500 . ?
C4 C5 1.437(15) . ?
C5 C6 1.419(17) . ?
C16 H16A 0.9800 . ?
C16 H16B 0.9800 . ?
C16 H16C 0.9800 . ?
C17 H17A 0.9800 . ?
C17 H17B 0.9800 . ?
C17 H17C 0.9800 . ?
C18 H18A 0.9800 . ?
C18 H18B 0.9800 . ?
C18 H18C 0.9800 . ?
C21 H21A 0.9800 . ?
C21 H21B 0.9800 . ?
C21 H21C 0.9800 . ?
C22 H22A 0.9800 . ?
C22 H22B 0.9800 . ?
C22 H22C 0.9800 . ?
C23 H23A 0.9800 . ?
C23 H23B 0.9800 . ?
C23 H23C 0.9800 . ?
C24 H24A 0.9800 . ?
C24 H24B 0.9800 . ?
C24 H24C 0.9800 . ?
C25 H25A 0.9800 . ?
C25 H25B 0.9800 . ?
C25 H25C 0.9800 . ?
C28 H28A 0.9800 . ?
C28 H28B 0.9800 . ?
C28 H28C 0.9800 . ?
C28 Si6 1.868(14) . ?
Si6 C27 1.884(17) . ?
Si6 C30 1.861(17) . ?
C6 C7 1.411(17) . ?
C7 H7 0.9500 . ?
C7 C8 1.366(18) . ?
C8 H8 0.9500 . ?
C8 C9 1.409(17) . ?
C9 H9 0.9500 . ?
C9 C10 1.360(17) . ?
C10 H10 0.9500 . ?
C20 H20A 0.9800 . ?
C20 H20B 0.9800 . ?
C20 H20C 0.9800 . ?
C27 H27A 0.9800 . ?
C27 H27B 0.9800 . ?
C27 H27C 0.9800 . ?
C30 H30A 0.9800 . ?
C30 H30B 0.9800 . ?
C30 H30C 0.9800 . ?
C19 H19A 0.9800 . ?
C19 H19B 0.9800 . ?
C19 H19C 0.9800 . ?
K1 O1 2.85(2) . ?
K1 O2 2.664(16) . ?
K1 O3 2.665(17) . ?
K1 O6 2.832(18) . ?
K1 O8 2.761(16) . ?
K1 O10 2.792(17) . ?
K1 O12 2.81(2) . ?
K1 O14 2.700(17) . ?
K1 O4 2.795(18) . ?
K1 O9 2.873(17) . ?
K1 O11 2.711(18) . ?
K1 O13 2.621(16) . ?
O1 C32 1.57(3) . ?
O1 C33 1.56(3) . ?
C31 H31A 0.9800 . ?
C31 H31B 0.9800 . ?
C31 H31C 0.9800 . ?
C31 C32 1.33(4) . ?
C32 H32A 0.9900 . ?
C32 H32B 0.9900 . ?
C33 H33A 0.9900 . ?
C33 H33B 0.9900 . ?
C33 C34 1.36(4) . ?
C34 H34A 0.9800 . ?
C34 H34B 0.9800 . ?
C34 H34C 0.9800 . ?
O2 C35 1.43(2) . ?
O2 C38 1.42(2) . ?
C35 H35A 0.9900 . ?
C35 H35B 0.9900 . ?
C35 C36 1.27(3) . ?
C36 H36A 0.9800 . ?
C36 H36B 0.9800 . ?
C36 H36C 0.9800 . ?
C37 H37A 0.9800 . ?
C37 H37B 0.9800 . ?
C37 H37C 0.9800 . ?
C37 C38 1.21(3) . ?
C38 H38A 0.9900 . ?
C38 H38B 0.9900 . ?
O3 C62 1.383(15) . ?
O3 C65 1.401(16) . ?
O6 C50 1.421(16) . ?
O6 C67 1.396(16) . ?
O8 C48 1.417(15) . ?
O8 C49 1.417(16) . ?
O10 C46 1.402(16) . ?
O10 C47 1.392(15) . ?
O12 C41 1.408(16) . ?
O12 C45 1.407(15) . ?
O14 C59 1.410(15) . ?
O14 C60 1.395(16) . ?
C41 H41A 0.9900 . ?
C41 H41B 0.9900 . ?
C41 C59 1.54(2) . ?
C45 H45A 0.9900 . ?
C45 H45B 0.9900 . ?
C45 C46 1.50(2) . ?
C46 H46A 0.9900 . ?
C46 H46B 0.9900 . ?
C47 H47A 0.9900 . ?
C47 H47B 0.9900 . ?
C47 C48 1.53(2) . ?
C48 H48A 0.9900 . ?
C48 H48B 0.9900 . ?
C49 H49A 0.9900 . ?
C49 H49B 0.9900 . ?
C49 C50 1.52(2) . ?
C50 H50A 0.9900 . ?
C50 H50B 0.9900 . ?
C59 H59A 0.9900 . ?
C59 H59B 0.9900 . ?
C60 H60A 0.9900 . ?
C60 H60B 0.9900 . ?
C60 C62 1.52(2) . ?
C62 H62A 0.9900 . ?
C62 H62B 0.9900 . ?
C65 H65A 0.9900 . ?
C65 H65B 0.9900 . ?
C65 C67 1.52(2) . ?
C67 H67A 0.9900 . ?
C67 H67B 0.9900 . ?
O4 C39 1.359(15) . ?
O4 C63 1.304(16) . ?
O5 C64 1.338(16) . ?
O5 C68 1.314(16) . ?
O7 C51 1.338(15) . ?
O7 C69 1.327(15) . ?
O9 C52 1.332(15) . ?
O9 C53 1.323(16) . ?
O11 C55 1.320(16) . ?
O11 C56 1.302(15) . ?
O13 C40 1.321(15) . ?
O13 C57 1.337(16) . ?
C39 H39A 0.9900 . ?
C39 H39B 0.9900 . ?
C39 C40 1.44(2) . ?
C40 H40A 0.9900 . ?
C40 H40B 0.9900 . ?
C51 H51A 0.9900 . ?
C51 H51B 0.9900 . ?
C51 C52 1.44(2) . ?
C52 H52A 0.9900 . ?
C52 H52B 0.9900 . ?
C53 H53A 0.9900 . ?
C53 H53B 0.9900 . ?
C53 C55 1.45(2) . ?
C55 H55A 0.9900 . ?
C55 H55B 0.9900 . ?
C56 H56A 0.9900 . ?
C56 H56B 0.9900 . ?
C56 C57 1.44(2) . ?
C57 H57A 0.9900 . ?
C57 H57B 0.9900 . ?
C63 H63A 0.9900 . ?
C63 H63B 0.9900 . ?
C63 C64 1.44(2) . ?
C64 H64A 0.9900 . ?
C64 H64B 0.9900 . ?
C68 H68A 0.9900 . ?
C68 H68B 0.9900 . ?
C68 C69 1.44(2) . ?
C69 H69A 0.9900 . ?
C69 H69B 0.9900 . ?
C23A H23D 0.9800 . ?
C23A H23E 0.9800 . ?
C23A H23F 0.9800 . ?
C23A Si3A 1.90(2) . ?
C24A H24D 0.9800 . ?
C24A H24E 0.9800 . ?
C24A H24F 0.9800 . ?
C24A Si3A 1.95(2) . ?
Si3A C25A 1.841(19) . ?
C25A H25D 0.9800 . ?
C25A H25E 0.9800 . ?
C25A H25F 0.9800 . ?
C27A H27D 0.9800 . ?
C27A H27E 0.9800 . ?
C27A H27F 0.9800 . ?
C27A Si6A 1.894(17) . ?
Si6A C28A 1.891(17) . ?
Si6A C30A 1.853(17) . ?
C28A H28D 0.9800 . ?
C28A H28E 0.9800 . ?
C28A H28F 0.9800 . ?
C30A H30D 0.9800 . ?
C30A H30E 0.9800 . ?
C30A H30F 0.9800 . ?
N1A C1A 1.358(18) . ?
N1A C5A 1.367(15) . ?
N2A C6A 1.398(15) . ?
N2A C10A 1.331(17) . ?
C1A H1A 0.9500 . ?
C1A C2A 1.376(16) . ?
C2A H2A 0.9500 . ?
C2A C3A 1.389(18) . ?
C3A H3A 0.9500 . ?
C3A C4A 1.381(18) . ?
C4A H4A 0.9500 . ?
C4A C5A 1.432(15) . ?
C5A C6A 1.403(16) . ?
C6A C7A 1.395(17) . ?
C7A H7A 0.9500 . ?
C7A C8A 1.360(18) . ?
C8A H8A 0.9500 . ?
C8A C9A 1.402(17) . ?
C9A H9A 0.9500 . ?
C9A C10A 1.354(16) . ?
C10A H10A 0.9500 . ?

loop_
_geom_angle_atom_site_label_1
_geom_angle_atom_site_label_2
_geom_angle_atom_site_label_3
_geom_angle
_geom_angle_site_symmetry_1
_geom_angle_site_symmetry_3
_geom_angle_publ_flag
N1 Zn1 N2 78.8(6) . . ?
N3 Zn1 N1 119.4(14) . . ?
N3 Zn1 N2 107.4(15) . . ?
N3 Zn1 N1A 120.2(17) . . ?
N3 Zn1 N2A 102.0(15) . . ?
N4 Zn1 N1 105.1(13) . . ?
N4 Zn1 N2 115.4(18) . . ?
N4 Zn1 N3 122.7(3) . . ?
N4 Zn1 N1A 104.4(14) . . ?
N4 Zn1 N2A 121.3(17) . . ?
N2A Zn1 N1A 79.0(6) . . ?
N3 Si1 C21 112.9(5) . . ?
N3 Si1 C22 113.4(5) . . ?
N3 Si1 C20 116.6(8) . . ?
N3 Si1 C19 111.7(7) . . ?
C21 Si1 C22 107.1(6) . . ?
C21 Si1 C20 91.6(10) . . ?
C21 Si1 C19 117.5(9) . . ?
C22 Si1 C20 113.0(9) . . ?
C22 Si1 C19 92.6(10) . . ?
N3 Si2 C16 112.9(4) . . ?
N3 Si2 C17 113.5(4) . . ?
N3 Si2 C18 113.6(4) . . ?
C16 Si2 C17 104.5(5) . . ?
C16 Si2 C18 104.8(4) . . ?
C18 Si2 C17 106.8(5) . . ?
N4 Si3 C23 117.1(8) . . ?
N4 Si3 C24 103.7(7) . . ?
N4 Si3 C25 114.5(7) . . ?
C23 Si3 C24 105.6(12) . . ?
C23 Si3 C25 110.5(12) . . ?
C25 Si3 C24 103.8(10) . . ?
C1 N1 Zn1 121.9(13) . . ?
C1 N1 C5 121.0(18) . . ?
C5 N1 Zn1 113.7(10) . . ?
C6 N2 Zn1 114.4(9) . . ?
C10 N2 Zn1 127.4(11) . . ?
C10 N2 C6 117.9(14) . . ?
Si1 N3 Zn1 116.7(4) . . ?
Si2 N3 Zn1 118.0(4) . . ?
Si2 N3 Si1 123.5(4) . . ?
Si3 N4 Zn1 109.0(4) . . ?
Si6 N4 Zn1 118.6(7) . . ?
Si3A N4 Zn1 126.6(5) . . ?
Si3A N4 Si6 114.7(7) . . ?
Si6A N4 Zn1 115.9(7) . . ?
Si6A N4 Si3 131.6(7) . . ?
N1 C1 H1 118.6 . . ?
C2 C1 N1 122.9(15) . . ?
C2 C1 H1 118.6 . . ?
C1 C2 H2 122.3 . . ?
C1 C2 C3 115.3(14) . . ?
C3 C2 H2 122.3 . . ?
C2 C3 H3 119.1 . . ?
C4 C3 C2 121.8(15) . . ?
C4 C3 H3 119.1 . . ?
C3 C4 H4 119.8 . . ?
C3 C4 C5 120.4(15) . . ?
C5 C4 H4 119.8 . . ?
N1 C5 C4 114.8(13) . . ?
N1 C5 C6 118.4(12) . . ?
C6 C5 C4 126.8(15) . . ?
Si2 C16 H16A 109.5 . . ?
Si2 C16 H16B 109.5 . . ?
Si2 C16 H16C 109.5 . . ?
H16A C16 H16B 109.5 . . ?
H16A C16 H16C 109.5 . . ?
H16B C16 H16C 109.5 . . ?
Si2 C17 H17A 109.5 . . ?
Si2 C17 H17B 109.5 . . ?
Si2 C17 H17C 109.5 . . ?
H17A C17 H17B 109.5 . . ?
H17A C17 H17C 109.5 . . ?
H17B C17 H17C 109.5 . . ?
Si2 C18 H18A 109.5 . . ?
Si2 C18 H18B 109.5 . . ?
Si2 C18 H18C 109.5 . . ?
H18A C18 H18B 109.5 . . ?
H18A C18 H18C 109.5 . . ?
H18B C18 H18C 109.5 . . ?
Si1 C21 H21A 109.5 . . ?
Si1 C21 H21B 109.5 . . ?
Si1 C21 H21C 109.5 . . ?
H21A C21 H21B 109.5 . . ?
H21A C21 H21C 109.5 . . ?
H21B C21 H21C 109.5 . . ?
Si1 C22 H22A 109.5 . . ?
Si1 C22 H22B 109.5 . . ?
Si1 C22 H22C 109.5 . . ?
H22A C22 H22B 109.5 . . ?
H22A C22 H22C 109.5 . . ?
H22B C22 H22C 109.5 . . ?
Si3 C23 H23A 109.5 . . ?
Si3 C23 H23B 109.5 . . ?
Si3 C23 H23C 109.5 . . ?
H23A C23 H23B 109.5 . . ?
H23A C23 H23C 109.5 . . ?
H23B C23 H23C 109.5 . . ?
Si3 C24 H24A 109.5 . . ?
Si3 C24 H24B 109.5 . . ?
Si3 C24 H24C 109.5 . . ?
H24A C24 H24B 109.5 . . ?
H24A C24 H24C 109.5 . . ?
H24B C24 H24C 109.5 . . ?
Si3 C25 H25A 109.5 . . ?
Si3 C25 H25B 109.5 . . ?
Si3 C25 H25C 109.5 . . ?
H25A C25 H25B 109.5 . . ?
H25A C25 H25C 109.5 . . ?
H25B C25 H25C 109.5 . . ?
H28A C28 H28B 109.5 . . ?
H28A C28 H28C 109.5 . . ?
H28B C28 H28C 109.5 . . ?
Si6 C28 H28A 109.5 . . ?
Si6 C28 H28B 109.5 . . ?
Si6 C28 H28C 109.5 . . ?
N4 Si6 C28 109.7(10) . . ?
N4 Si6 C27 114.7(10) . . ?
N4 Si6 C30 117.6(12) . . ?
C28 Si6 C27 107.6(11) . . ?
C30 Si6 C28 105.5(12) . . ?
C30 Si6 C27 100.8(12) . . ?
N2 C6 C5 114.0(14) . . ?
C7 C6 N2 116.6(13) . . ?
C7 C6 C5 129.4(14) . . ?
C6 C7 H7 118.2 . . ?
C8 C7 C6 123.6(13) . . ?
C8 C7 H7 118.2 . . ?
C7 C8 H8 120.9 . . ?
C7 C8 C9 118.1(13) . . ?
C9 C8 H8 120.9 . . ?
C8 C9 H9 121.5 . . ?
C10 C9 C8 116.9(14) . . ?
C10 C9 H9 121.5 . . ?
N2 C10 C9 126.5(14) . . ?
N2 C10 H10 116.7 . . ?
C9 C10 H10 116.7 . . ?
Si1 C20 H20A 109.5 . . ?
Si1 C20 H20B 109.5 . . ?
Si1 C20 H20C 109.5 . . ?
H20A C20 H20B 109.5 . . ?
H20A C20 H20C 109.5 . . ?
H20B C20 H20C 109.5 . . ?
Si6 C27 H27A 109.5 . . ?
Si6 C27 H27B 109.5 . . ?
Si6 C27 H27C 109.5 . . ?
H27A C27 H27B 109.5 . . ?
H27A C27 H27C 109.5 . . ?
H27B C27 H27C 109.5 . . ?
Si6 C30 H30A 109.5 . . ?
Si6 C30 H30B 109.5 . . ?
Si6 C30 H30C 109.5 . . ?
H30A C30 H30B 109.5 . . ?
H30A C30 H30C 109.5 . . ?
H30B C30 H30C 109.5 . . ?
Si1 C19 H19A 109.5 . . ?
Si1 C19 H19B 109.5 . . ?
Si1 C19 H19C 109.5 . . ?
H19A C19 H19B 109.5 . . ?
H19A C19 H19C 109.5 . . ?
H19B C19 H19C 109.5 . . ?
O3 K1 O6 59.4(4) . . ?
O3 K1 O8 119.1(4) . . ?
O3 K1 O10 177.8(5) . . ?
O3 K1 O12 122.8(4) . . ?
O3 K1 O14 62.7(4) . . ?
O8 K1 O6 60.9(4) . . ?
O8 K1 O10 58.8(4) . . ?
O8 K1 O12 116.2(4) . . ?
O10 K1 O6 118.8(4) . . ?
O10 K1 O12 59.0(4) . . ?
O12 K1 O6 176.4(6) . . ?
O14 K1 O6 121.7(4) . . ?
O14 K1 O8 174.7(6) . . ?
O14 K1 O10 119.2(4) . . ?
O14 K1 O12 60.9(4) . . ?
O4 K1 O9 172.0(4) . . ?
O11 K1 O4 128.1(4) . . ?
O11 K1 O9 59.9(4) . . ?
O13 K1 O4 61.7(4) . . ?
O13 K1 O9 126.3(4) . . ?
O13 K1 O11 67.1(4) . . ?
C32 O1 K1 145.1(18) . . ?
C33 O1 K1 103.3(18) . . ?
C33 O1 C32 111(3) . . ?
H31A C31 H31B 109.5 . . ?
H31A C31 H31C 109.5 . . ?
H31B C31 H31C 109.5 . . ?
C32 C31 H31A 109.5 . . ?
C32 C31 H31B 109.5 . . ?
C32 C31 H31C 109.5 . . ?
O1 C32 H32A 108.4 . . ?
O1 C32 H32B 108.4 . . ?
C31 C32 O1 116(3) . . ?
C31 C32 H32A 108.4 . . ?
C31 C32 H32B 108.4 . . ?
H32A C32 H32B 107.4 . . ?
O1 C33 H33A 108.8 . . ?
O1 C33 H33B 108.8 . . ?
H33A C33 H33B 107.7 . . ?
C34 C33 O1 114(3) . . ?
C34 C33 H33A 108.8 . . ?
C34 C33 H33B 108.8 . . ?
K1 C34 H34A 31.2 . . ?
K1 C34 H34B 137.6 . . ?
K1 C34 H34C 102.5 . . ?
C33 C34 K1 84(2) . . ?
C33 C34 H34A 109.5 . . ?
C33 C34 H34B 109.5 . . ?
C33 C34 H34C 109.5 . . ?
H34A C34 H34B 109.5 . . ?
H34A C34 H34C 109.5 . . ?
H34B C34 H34C 109.5 . . ?
C35 O2 K1 127.5(14) . . ?
C38 O2 K1 132.4(14) . . ?
C38 O2 C35 100(2) . . ?
O2 C35 H35A 108.3 . . ?
O2 C35 H35B 108.3 . . ?
H35A C35 H35B 107.4 . . ?
C36 C35 O2 116(2) . . ?
C36 C35 H35A 108.3 . . ?
C36 C35 H35B 108.3 . . ?
C35 C36 H36A 109.5 . . ?
C35 C36 H36B 109.5 . . ?
C35 C36 H36C 109.5 . . ?
H36A C36 H36B 109.5 . . ?
H36A C36 H36C 109.5 . . ?
H36B C36 H36C 109.5 . . ?
H37A C37 H37B 109.5 . . ?
H37A C37 H37C 109.5 . . ?
H37B C37 H37C 109.5 . . ?
C38 C37 H37A 109.5 . . ?
C38 C37 H37B 109.5 . . ?
C38 C37 H37C 109.5 . . ?
O2 C38 H38A 103.9 . . ?
O2 C38 H38B 103.9 . . ?
C37 C38 O2 133(3) . . ?
C37 C38 H38A 103.9 . . ?
C37 C38 H38B 103.9 . . ?
H38A C38 H38B 105.4 . . ?
C62 O3 K1 118.2(12) . . ?
C62 O3 C65 113.6(16) . . ?
C65 O3 K1 122.8(14) . . ?
C50 O6 K1 110.0(14) . . ?
C67 O6 K1 115.5(13) . . ?
C67 O6 C50 111.9(17) . . ?
C48 O8 K1 118.0(11) . . ?
C49 O8 K1 116.8(13) . . ?
C49 O8 C48 107.8(15) . . ?
C46 O10 K1 119.8(13) . . ?
C47 O10 K1 120.4(12) . . ?
C47 O10 C46 111.0(16) . . ?
C41 O12 K1 115.3(15) . . ?
C45 O12 K1 117.5(13) . . ?
C45 O12 C41 110.5(16) . . ?
C59 O14 K1 118.7(12) . . ?
C60 O14 K1 112.1(13) . . ?
C60 O14 C59 112.1(16) . . ?
O12 C41 H41A 110.2 . . ?
O12 C41 H41B 110.2 . . ?
O12 C41 C59 107.4(16) . . ?
H41A C41 H41B 108.5 . . ?
C59 C41 H41A 110.2 . . ?
C59 C41 H41B 110.2 . . ?
O12 C45 H45A 109.4 . . ?
O12 C45 H45B 109.4 . . ?
O12 C45 C46 111.2(15) . . ?
H45A C45 H45B 108.0 . . ?
C46 C45 H45A 109.4 . . ?
C46 C45 H45B 109.4 . . ?
O10 C46 C45 109.7(16) . . ?
O10 C46 H46A 109.7 . . ?
O10 C46 H46B 109.7 . . ?
C45 C46 H46A 109.7 . . ?
C45 C46 H46B 109.7 . . ?
H46A C46 H46B 108.2 . . ?
O10 C47 H47A 109.5 . . ?
O10 C47 H47B 109.5 . . ?
O10 C47 C48 110.7(14) . . ?
H47A C47 H47B 108.1 . . ?
C48 C47 H47A 109.5 . . ?
C48 C47 H47B 109.5 . . ?
O8 C48 C47 107.8(14) . . ?
O8 C48 H48A 110.1 . . ?
O8 C48 H48B 110.1 . . ?
C47 C48 H48A 110.1 . . ?
C47 C48 H48B 110.1 . . ?
H48A C48 H48B 108.5 . . ?
O8 C49 H49A 110.2 . . ?
O8 C49 H49B 110.2 . . ?
O8 C49 C50 107.3(17) . . ?
H49A C49 H49B 108.5 . . ?
C50 C49 H49A 110.2 . . ?
C50 C49 H49B 110.2 . . ?
O6 C50 C49 108.9(18) . . ?
O6 C50 H50A 109.9 . . ?
O6 C50 H50B 109.9 . . ?
C49 C50 H50A 109.9 . . ?
C49 C50 H50B 109.9 . . ?
H50A C50 H50B 108.3 . . ?
O14 C59 C41 112.0(17) . . ?
O14 C59 H59A 109.2 . . ?
O14 C59 H59B 109.2 . . ?
C41 C59 H59A 109.2 . . ?
C41 C59 H59B 109.2 . . ?
H59A C59 H59B 107.9 . . ?
K1 C60 H60A 89.5 . . ?
K1 C60 H60B 154.8 . . ?
O14 C60 K1 46.0(10) . . ?
O14 C60 H60A 109.6 . . ?
O14 C60 H60B 109.6 . . ?
O14 C60 C62 110.3(17) . . ?
H60A C60 H60B 108.1 . . ?
C62 C60 K1 79.7(10) . . ?
C62 C60 H60A 109.6 . . ?
C62 C60 H60B 109.6 . . ?
K1 C62 H62A 104.0 . . ?
K1 C62 H62B 143.4 . . ?
O3 C62 K1 41.6(9) . . ?
O3 C62 C60 111.4(16) . . ?
O3 C62 H62A 109.4 . . ?
O3 C62 H62B 109.4 . . ?
C60 C62 K1 75.2(10) . . ?
C60 C62 H62A 109.4 . . ?
C60 C62 H62B 109.4 . . ?
H62A C62 H62B 108.0 . . ?
O3 C65 H65A 110.1 . . ?
O3 C65 H65B 110.1 . . ?
O3 C65 C67 108.1(17) . . ?
H65A C65 H65B 108.4 . . ?
C67 C65 H65A 110.1 . . ?
C67 C65 H65B 110.1 . . ?
O6 C67 C65 110.2(17) . . ?
O6 C67 H67A 109.6 . . ?
O6 C67 H67B 109.6 . . ?
C65 C67 H67A 109.6 . . ?
C65 C67 H67B 109.6 . . ?
H67A C67 H67B 108.1 . . ?
C39 O4 K1 112.6(13) . . ?
C63 O4 K1 112.4(14) . . ?
C63 O4 C39 119.9(18) . . ?
C64 O5 K1 112.5(13) . . ?
C68 O5 K1 117.1(15) . . ?
C68 O5 C64 119(2) . . ?
C51 O7 K1 115.7(13) . . ?
C69 O7 K1 118.5(12) . . ?
C69 O7 C51 116.3(17) . . ?
C52 O9 K1 115.1(13) . . ?
C53 O9 K1 112.4(13) . . ?
C53 O9 C52 117.7(18) . . ?
C55 O11 K1 118.8(14) . . ?
C56 O11 K1 103.5(14) . . ?
C56 O11 C55 127.6(19) . . ?
C40 O13 K1 119.4(14) . . ?
C40 O13 C57 119.2(18) . . ?
C57 O13 K1 106.2(16) . . ?
O4 C39 H39A 108.3 . . ?
O4 C39 H39B 108.3 . . ?
O4 C39 C40 115.8(18) . . ?
H39A C39 H39B 107.4 . . ?
C40 C39 H39A 108.3 . . ?
C40 C39 H39B 108.3 . . ?
K1 C40 H40A 102.8 . . ?
K1 C40 H40B 143.3 . . ?
O13 C40 K1 41.2(10) . . ?
O13 C40 C39 117.0(18) . . ?
O13 C40 H40A 108.1 . . ?
O13 C40 H40B 108.1 . . ?
C39 C40 K1 81.4(10) . . ?
C39 C40 H40A 108.1 . . ?
C39 C40 H40B 108.1 . . ?
H40A C40 H40B 107.3 . . ?
O7 C51 H51A 109.7 . . ?
O7 C51 H51B 109.7 . . ?
O7 C51 C52 109.9(17) . . ?
H51A C51 H51B 108.2 . . ?
C52 C51 H51A 109.7 . . ?
C52 C51 H51B 109.7 . . ?
O9 C52 C51 118.0(19) . . ?
O9 C52 H52A 107.8 . . ?
O9 C52 H52B 107.8 . . ?
C51 C52 H52A 107.8 . . ?
C51 C52 H52B 107.8 . . ?
H52A C52 H52B 107.2 . . ?
O9 C53 H53A 108.2 . . ?
O9 C53 H53B 108.2 . . ?
O9 C53 C55 116.4(18) . . ?
H53A C53 H53B 107.3 . . ?
C55 C53 H53A 108.2 . . ?
C55 C53 H53B 108.2 . . ?
O11 C55 C53 114.5(19) . . ?
O11 C55 H55A 108.6 . . ?
O11 C55 H55B 108.6 . . ?
C53 C55 H55A 108.6 . . ?
C53 C55 H55B 108.6 . . ?
H55A C55 H55B 107.6 . . ?
K1 C56 H56A 155.5 . . ?
K1 C56 H56B 94.6 . . ?
O11 C56 K1 53.7(12) . . ?
O11 C56 H56A 107.1 . . ?
O11 C56 H56B 107.1 . . ?
O11 C56 C57 121(2) . . ?
H56A C56 H56B 106.8 . . ?
C57 C56 K1 76.7(13) . . ?
C57 C56 H56A 107.1 . . ?
C57 C56 H56B 107.1 . . ?
K1 C57 H57A 158.1 . . ?
K1 C57 H57B 88.8 . . ?
O13 C57 K1 50.6(12) . . ?
O13 C57 C56 113.2(19) . . ?
O13 C57 H57A 108.9 . . ?
O13 C57 H57B 108.9 . . ?
C56 C57 K1 77.8(13) . . ?
C56 C57 H57A 108.9 . . ?
C56 C57 H57B 108.9 . . ?
H57A C57 H57B 107.7 . . ?
K1 C63 H63A 155.4 . . ?
K1 C63 H63B 88.5 . . ?
O4 C63 K1 47.5(11) . . ?
O4 C63 H63A 108.5 . . ?
O4 C63 H63B 108.5 . . ?
O4 C63 C64 115(2) . . ?
H63A C63 H63B 107.5 . . ?
C64 C63 K1 82.7(11) . . ?
C64 C63 H63A 108.5 . . ?
C64 C63 H63B 108.5 . . ?
O5 C64 C63 117(2) . . ?
O5 C64 H64A 108.1 . . ?
O5 C64 H64B 108.1 . . ?
C63 C64 H64A 108.1 . . ?
C63 C64 H64B 108.1 . . ?
H64A C64 H64B 107.3 . . ?
O5 C68 H68A 108.7 . . ?
O5 C68 H68B 108.7 . . ?
O5 C68 C69 114.3(18) . . ?
H68A C68 H68B 107.6 . . ?
C69 C68 H68A 108.7 . . ?
C69 C68 H68B 108.7 . . ?
O7 C69 C68 115.0(18) . . ?
O7 C69 H69A 108.5 . . ?
O7 C69 H69B 108.5 . . ?
C68 C69 H69A 108.5 . . ?
C68 C69 H69B 108.5 . . ?
H69A C69 H69B 107.5 . . ?
H23D C23A H23E 109.5 . . ?
H23D C23A H23F 109.5 . . ?
H23E C23A H23F 109.5 . . ?
Si3A C23A H23D 109.5 . . ?
Si3A C23A H23E 109.5 . . ?
Si3A C23A H23F 109.5 . . ?
H24D C24A H24E 109.5 . . ?
H24D C24A H24F 109.5 . . ?
H24E C24A H24F 109.5 . . ?
Si3A C24A H24D 109.5 . . ?
Si3A C24A H24E 109.5 . . ?
Si3A C24A H24F 109.5 . . ?
N4 Si3A C23A 110.5(7) . . ?
N4 Si3A C24A 107.5(7) . . ?
N4 Si3A C25A 123.2(8) . . ?
C23A Si3A C24A 102.7(12) . . ?
C25A Si3A C23A 107.0(11) . . ?
C25A Si3A C24A 104.0(11) . . ?
Si3A C25A H25D 109.5 . . ?
Si3A C25A H25E 109.5 . . ?
Si3A C25A H25F 109.5 . . ?
H25D C25A H25E 109.5 . . ?
H25D C25A H25F 109.5 . . ?
H25E C25A H25F 109.5 . . ?
H27D C27A H27E 109.5 . . ?
H27D C27A H27F 109.5 . . ?
H27E C27A H27F 109.5 . . ?
Si6A C27A H27D 109.5 . . ?
Si6A C27A H27E 109.5 . . ?
Si6A C27A H27F 109.5 . . ?
N4 Si6A C27A 109.6(10) . . ?
N4 Si6A C28A 110.7(10) . . ?
N4 Si6A C30A 118.2(12) . . ?
C28A Si6A C27A 109.1(11) . . ?
C30A Si6A C27A 101.3(12) . . ?
C30A Si6A C28A 107.3(11) . . ?
Si6A C28A H28D 109.5 . . ?
Si6A C28A H28E 109.5 . . ?
Si6A C28A H28F 109.5 . . ?
H28D C28A H28E 109.5 . . ?
H28D C28A H28F 109.5 . . ?
H28E C28A H28F 109.5 . . ?
Si6A C30A H30D 109.5 . . ?
Si6A C30A H30E 109.5 . . ?
Si6A C30A H30F 109.5 . . ?
H30D C30A H30E 109.5 . . ?
H30D C30A H30F 109.5 . . ?
H30E C30A H30F 109.5 . . ?
C1A N1A Zn1 131.5(12) . . ?
C1A N1A C5A 113.6(14) . . ?
C5A N1A Zn1 114.1(10) . . ?
C6A N2A Zn1 112.9(9) . . ?
C10A N2A Zn1 128.1(11) . . ?
C10A N2A C6A 117.7(15) . . ?
N1A C1A H1A 117.1 . . ?
N1A C1A C2A 125.8(16) . . ?
C2A C1A H1A 117.1 . . ?
C1A C2A H2A 120.3 . . ?
C1A C2A C3A 119.4(14) . . ?
C3A C2A H2A 120.3 . . ?
C2A C3A H3A 121.3 . . ?
C4A C3A C2A 117.3(15) . . ?
C4A C3A H3A 121.3 . . ?
C3A C4A H4A 120.3 . . ?
C3A C4A C5A 119.4(15) . . ?
C5A C4A H4A 120.3 . . ?
N1A C5A C4A 123.1(13) . . ?
N1A C5A C6A 116.5(12) . . ?
C6A C5A C4A 120.3(13) . . ?
N2A C6A C5A 117.3(12) . . ?
C7A C6A N2A 120.8(12) . . ?
C7A C6A C5A 121.9(13) . . ?
C6A C7A H7A 120.3 . . ?
C8A C7A C6A 119.5(13) . . ?
C8A C7A H7A 120.3 . . ?
C7A C8A H8A 120.5 . . ?
C7A C8A C9A 119.0(14) . . ?
C9A C8A H8A 120.5 . . ?
C8A C9A H9A 120.1 . . ?
C10A C9A C8A 119.7(13) . . ?
C10A C9A H9A 120.1 . . ?
N2A C10A C9A 123.2(13) . . ?
N2A C10A H10A 118.4 . . ?
C9A C10A H10A 118.4 . . ?

_shelx_res_file                  
;
TITL gwx052a_0m_a.res in P2(1)/c
    k{18c6}zn10.res
    created by SHELXL-2018/3 at 09:59:21 on 05-Jun-2019
REM Old TITL GWX052a_0m in P2/c
REM SHELXT solution in P2(1)/c
REM R1 0.282, Rweak 0.058, Alpha 0.119, Orientation as input
REM Formula found by SHELXT: C42 N7 O11 Si5 K2 Zn
CELL 0.71073 12.1899 18.4365 22.8273 90 95.423 90
ZERR 4 0.0007 0.001 0.0013 0 0.002 0
LATT 1
SYMM -X,0.5+Y,0.5-Z
SFAC C H K N O Si Zn
UNIT 152 312 4 16 28 16 4
DFIX 1.8 Si6 C28
SADI O14 C59 O14 C60 O12 C41 O12 C45 O10 C46 O10 C47 O8 C48 O8 C49 O6 C50 =
 O6 C67 O3 C65 O3 C62
SADI C59 C41 C45 C46 C47 C48 C49 C50 C67 C65 C62 C60
SADI 0.04 C41 C45 C46 C47 C48 C49 C50 C67 C65 C62 C60 C59
SADI 0.04 O14 C41 O12 C46 O10 C48 O8 C50 O6 C65 O3 C60 O12 C59 O10 C45 O8 =
 C47 O6 C49 O3 C67 O14 C62
SADI O4 C63 O4 C39 O5 C64 O5 C68 O7 C69 O7 C51 O9 C52 O9 C53 O11 C55 O11 =
 C56 O13 C57 O13 C40
SADI C63 C64 C68 C69 C51 C52 C53 C55 C56 C57 C40 C39
SADI 0.04 C64 C68 C69 C51 C52 C53 C55 C56 C57 C40 C39 C63
SADI 0.04 O4 C64 O5 C69 O7 C52 O9 C55 O11 C57 O13 C39 O5 C63 O7 C68 O9 C51 =
 O11 C53 O13 C56 O4 C40
SADI Si1 C20 Si1 C19
SADI C37 C38 C35 C36
SADI O2 C38 O2 C35
SADI 0.04 C37 O2 O2 C36
SADI C34 C33 C32 C31
SADI O1 C33 O1 C32
SADI 0.04 C34 O1 O1 C31
SADI Si3 N4 Si3A N4
SADI Si3 C23 Si3A C23A
SADI Si3 C24 Si3A C24A
SADI Si3 C25 Si3A C25A
SADI 0.04 N4 C23 N4 C23A
SADI 0.04 N4 C24 N4 C24A
SADI 0.04 N4 C25 N4 C25A
SADI 0.04 C23 C24 C23A C24A
SADI 0.04 C23 C25 C23A C25A
SADI 0.04 C24 C25 C24A C25A
SADI N4 Si6 N4 Si6A
SADI C28 Si6 C28A Si6A
SADI Si6 C27 Si6A C27A
SADI Si6 C30 Si6A C30A
SADI 0.04 N4 C28 N4 C28A
SADI 0.04 N4 C27 N4 C27A
SADI 0.04 N4 C30 N4 C30A
SADI 0.04 C28 C27 C28A C27A
SADI 0.04 C28 C30 C28A C30A
SADI 0.04 C27 C30 C27A C30A
SADI Zn1 N1 Zn1 N1A
SADI Zn1 N2 Zn1 N2A
SADI N1 C1 N1A C1A
SADI N1 C5 N1A C5A
SADI N2 C6 N2A C6A
SADI N2 C10 N2A C10A
SADI C1 C2 C1A C2A
SADI C2 C3 C2A C3A
SADI C3 C4 C3A C4A
SADI C4 C5 C4A C5A
SADI C5 C6 C5A C6A
SADI C6 C7 C6A C7A
SADI C7 C8 C7A C8A
SADI C8 C9 C8A C9A
SADI C9 C10 C9A C10A
SADI 0.04 Zn1 C1 Zn1 C1A
SADI 0.04 Zn1 C5 Zn1 C5A
SADI 0.04 Zn1 C6 Zn1 C6A
SADI 0.04 Zn1 C10 Zn1 C10A
SADI 0.04 N1 C2 N1A C2A
SADI 0.04 N1 C4 N1A C4A
SADI 0.04 N1 C6 N1A C6A
SADI 0.04 N2 C5 N2A C5A
SADI 0.04 N2 C7 N2A C7A
SADI 0.04 N2 C9 N2A C9A
SADI 0.04 C1 C3 C1A C3A
SADI 0.04 C1 C5 C1A C5A
SADI 0.04 C2 C4 C2A C4A
SADI 0.04 C3 C5 C3A C5A
SADI 0.04 C4 C6 C4A C6A
SADI 0.04 C5 C7 C5A C7A
SADI 0.04 C6 C8 C6A C8A
SADI 0.04 C6 C10 C6A C10A
SADI 0.04 C7 C9 C7A C9A
SADI 0.04 C8 C10 C8A C10A
SIMU O3 > C67
SIMU O4 > C69
SIMU O1 > C34
SIMU O2 > C38
SIMU C23 C24 Si3 C25 N4 C30 Si6 C27
SIMU C23 C24 Si3 C25
SIMU N4 C27 Si6 C28 C30
SIMU N1 N2 C1 H1 C2 H2 C3 H3 C4 H4 C5 C6 C7 H7 C8 H8 C9 H9 C10 H10
SIMU N1A N2A C1A C2A H2A C3A H3A C4A H4A C5A C6A C7A H7A C8A H8A C9A H9A =
 C10A H10A H1A
RIGU O3 > C67
RIGU O4 > C69
RIGU O1 > C34
RIGU O2 > C38
RIGU C23 C24 Si3 C25 N4 C30 Si6 C27
RIGU C23 C24 Si3 C25
RIGU N4 C27 Si6 C28 C30
RIGU N1 N2 C1 H1 C2 H2 C3 H3 C4 H4 C5 C6 C7 H7 C8 H8 C9 H9 C10 H10
RIGU N1A N2A C1A C2A H2A C3A H3A C4A H4A C5A C6A C7A H7A C8A H8A C9A H9A =
 C10A H10A H1A
ISOR O14 O12 O10 O8 O6 O3 C59 C41 C45 C46 C47 C48 C49 C50 C67 C65 C62 C60
ISOR O4 O5 O7 O9 O11 O13 C63 C64 C68 C69 C51 C52 C53 C55 C56 C57 C40 C39
ISOR O1 C34 C33 C32 C31
ISOR C36 C35 O2 C38 C37
ISOR C23 C24 Si3 C25 N4 C30 Si6 C27
ISOR C23 C24 Si3 C25
ISOR N4 C27 Si6 C28 C30
ISOR 0.01 0.0002 Si6 C27
ISOR 0.01 0.02 C27 C28 C30
ISOR N1 N2 C1 H1 C2 H2 C3 H3 C4 H4 C5 C6 C7 H7 C8 H8 C9 H9 C10 H10
ISOR N1A N2A C1A C2A H2A C3A H3A C4A H4A C5A C6A C7A H7A C8A H8A C9A H9A =
 C10A H10A H1A
EADP C6 C2
EADP C10 C1
EADP C34 C31 C32 C33
EADP O14 O4 O3 O5 O6 O7 O8 O9 O10 O11 O12 O13
EADP C40 C59 C41 C50 C39
EADP C25 C24 C23
EADP C35 C38
EADP C24 C25A
EADP C24A C23
EADP C23A C25
EADP Si3 Si1 Si3A
EADP C1 C7
EADP C22 C21
EADP Si6A Si6
EADP C27A C27
EADP C30A C30
EADP N1A N4
EADP N1 N3
EADP C3 C3A
EADP C2A C2

L.S. 20
PLAN  20
SIZE 0.15 0.383 0.492
TEMP -173.15
FREE K1 C21
FREE K1 H34a
FREE C62 C8
BOND $H
LIST 6
fmap 2
acta
OMIT 0 50
OMIT 2 14 4
REM <olex2.extras>
REM <HklSrc "%.\\GWX052a_0m.hkl">
REM </olex2.extras>

WGHT    0.000200  100.834503
FVAR       0.31166
ZN1   7    0.522916    0.743432    0.551876    11.00000    0.02548    0.01086 =
         0.02036   -0.00231    0.01103   -0.00280
SI1   6    0.777408    0.716455    0.556144    11.00000    0.02849    0.04101 =
         0.03352   -0.01753    0.00520   -0.00490
SI2   6    0.630338    0.637136    0.465319    11.00000    0.02635    0.01770 =
         0.02172   -0.00863    0.00485   -0.00277
PART 1
SI3   6    0.447433    0.852071    0.454778    10.50000    0.02849    0.04101 =
         0.03352   -0.01753    0.00520   -0.00490
N1    4    0.546496    0.811718    0.625064    10.50000    0.02267    0.02485 =
         0.03650   -0.01839    0.01692   -0.01103
N2    4    0.481626    0.674175    0.619148    10.50000    0.02584    0.02191 =
         0.01960   -0.00187    0.00327    0.00165
PART 0
N3    4    0.652649    0.701261    0.518395    11.00000    0.02267    0.02485 =
         0.03650   -0.01839    0.01692   -0.01103
N4    4    0.397300    0.785292    0.502670    11.00000    0.05228    0.03220 =
         0.02759    0.00219    0.01362    0.01750
PART 1
C1    1    0.552045    0.886088    0.619419    10.50000    0.02873    0.02596 =
         0.01919   -0.00717    0.00569   -0.00072
AFIX  43
H1    2    0.548878    0.906297    0.581014    10.50000   -1.20000
AFIX   0
C2    1    0.561951    0.932217    0.666888    10.50000    0.02361    0.02211 =
         0.02617   -0.00586   -0.00003    0.00846
AFIX  43
H2    2    0.567923    0.983286    0.662644    10.50000   -1.20000
AFIX   0
C3    1    0.562626    0.898837    0.721735    10.50000    0.04427    0.02774 =
         0.01987   -0.01216   -0.00719    0.00759
AFIX  43
H3    2    0.584123    0.926196    0.756183    10.50000   -1.20000
AFIX   0
C4    1    0.532711    0.826663    0.727347    10.50000    0.04297    0.02477 =
         0.02049   -0.00128   -0.00798    0.01823
AFIX  43
H4    2    0.521117    0.807822    0.765003    10.50000   -1.20000
AFIX   0
C5    1    0.519171    0.780279    0.676564    10.50000    0.02271    0.02228 =
         0.03082   -0.00850    0.00757    0.00690
PART 0
C16   1    0.481785    0.623896    0.441148    11.00000    0.02891    0.02810 =
         0.04513   -0.00937   -0.01509    0.00124
AFIX 137
H16A  2    0.443879    0.605753    0.474197    11.00000   -1.50000
H16B  2    0.473941    0.588689    0.408859    11.00000   -1.50000
H16C  2    0.449204    0.670263    0.427644    11.00000   -1.50000
AFIX   0
C17   1    0.694753    0.659541    0.395663    11.00000    0.07084    0.03880 =
         0.03482   -0.00551    0.02221   -0.00502
AFIX 137
H17A  2    0.657565    0.701752    0.376758    11.00000   -1.50000
H17B  2    0.687131    0.617966    0.368836    11.00000   -1.50000
H17C  2    0.773062    0.670556    0.405172    11.00000   -1.50000
AFIX   0
C18   1    0.681386    0.545098    0.488937    11.00000    0.04132    0.02763 =
         0.03485   -0.00760   -0.00071    0.01004
AFIX 137
H18A  2    0.760299    0.547656    0.501801    11.00000   -1.50000
H18B  2    0.669311    0.511288    0.455827    11.00000   -1.50000
H18C  2    0.641312    0.528094    0.521564    11.00000   -1.50000
AFIX   0
C21   1    0.787042    0.679766    0.631811    11.00000    0.05272    0.07219 =
         0.07699   -0.01467   -0.01937   -0.02499
AFIX 137
H21A  2    0.736290    0.706212    0.654919    11.00000   -1.50000
H21B  2    0.862582    0.685419    0.650100    11.00000   -1.50000
H21C  2    0.767362    0.628214    0.630532    11.00000   -1.50000
AFIX   0
C22   1    0.814758    0.814613    0.562062    11.00000    0.05272    0.07219 =
         0.07699   -0.01467   -0.01937   -0.02499
AFIX 137
H22A  2    0.810682    0.836044    0.522629    11.00000   -1.50000
H22B  2    0.889898    0.819555    0.581071    11.00000   -1.50000
H22C  2    0.763292    0.839740    0.585592    11.00000   -1.50000
AFIX   0
PART 1
C23   1    0.597709    0.862904    0.456738    10.50000    0.10966    0.03303 =
         0.03629    0.01925    0.03289    0.02533
AFIX 137
H23A  2    0.626139    0.884116    0.494521    10.50000   -1.50000
H23B  2    0.615156    0.894963    0.424655    10.50000   -1.50000
H23C  2    0.631912    0.815404    0.452084    10.50000   -1.50000
AFIX   0
C24   1    0.399666    0.815774    0.376091    10.50000    0.10966    0.03303 =
         0.03629    0.01925    0.03289    0.02533
AFIX 137
H24A  2    0.454304    0.781343    0.363812    10.50000   -1.50000
H24B  2    0.392354    0.856432    0.348342    10.50000   -1.50000
H24C  2    0.328376    0.791337    0.376641    10.50000   -1.50000
AFIX   0
C25   1    0.379801    0.941249    0.457277    10.50000    0.10966    0.03303 =
         0.03629    0.01925    0.03289    0.02533
AFIX 137
H25A  2    0.303252    0.937305    0.440114    10.50000   -1.50000
H25B  2    0.419042    0.976485    0.434804    10.50000   -1.50000
H25C  2    0.381136    0.957388    0.498243    10.50000   -1.50000
AFIX   0
PART 0
PART -2
C28   1    0.232570    0.797590    0.588483    10.50000    0.02603    0.04037 =
         0.05204    0.00143    0.00575   -0.00986
AFIX 137
H28A  2    0.283004    0.776864    0.620080    10.50000   -1.50000
H28B  2    0.156511    0.785225    0.595059    10.50000   -1.50000
H28C  2    0.240987    0.850450    0.588230    10.50000   -1.50000
AFIX   0
SI6   6    0.265370    0.759908    0.516198    10.50000    0.04170    0.07844 =
         0.02656   -0.00063    0.00562    0.03498
PART 0
PART 1
C6    1    0.478236    0.708194    0.674398    10.50000    0.02361    0.02211 =
         0.02617   -0.00586   -0.00003    0.00846
C7    1    0.435345    0.666781    0.718960    10.50000    0.02873    0.02596 =
         0.01919   -0.00717    0.00569   -0.00072
AFIX  43
H7    2    0.428774    0.689217    0.755930    10.50000   -1.20000
AFIX   0
C8    1    0.402757    0.596171    0.711819    10.50000    0.03369    0.02593 =
         0.01900    0.00492    0.00942   -0.00020
AFIX  43
H8    2    0.372854    0.570490    0.742699    10.50000   -1.20000
AFIX   0
C9    1    0.414739    0.562507    0.657377    10.50000    0.03749    0.02137 =
         0.02559   -0.00333    0.00566   -0.00822
AFIX  43
H9    2    0.399333    0.512427    0.651221    10.50000   -1.20000
AFIX   0
C10   1    0.449385    0.605019    0.614037    10.50000    0.02873    0.02596 =
         0.01919   -0.00717    0.00569   -0.00072
AFIX  43
H10   2    0.450797    0.583362    0.576354    10.50000   -1.20000
AFIX   0
C20   1    0.897598    0.656119    0.536140    10.50000    0.01743    0.04728 =
         0.08430   -0.01945    0.00057    0.00749
AFIX 137
H20A  2    0.964930    0.669554    0.560611    10.50000   -1.50000
H20B  2    0.908818    0.663004    0.494557    10.50000   -1.50000
H20C  2    0.880125    0.605136    0.543087    10.50000   -1.50000
AFIX   0
PART 0
PART -2
C27   1    0.241503    0.659018    0.517880    10.50000    0.05547    0.05550 =
         0.05549   -0.00003    0.00526    0.00000
AFIX 137
H27A  2    0.270060    0.636576    0.483487    10.50000   -1.50000
H27B  2    0.162338    0.649332    0.517156    10.50000   -1.50000
H27C  2    0.279694    0.638654    0.553872    10.50000   -1.50000
AFIX   0
C30   1    0.149735    0.788786    0.462169    10.50000    0.06838    0.09664 =
         0.05797   -0.00813   -0.00241    0.03951
AFIX 137
H30A  2    0.148840    0.841819    0.459253    10.50000   -1.50000
H30B  2    0.079822    0.771893    0.475240    10.50000   -1.50000
H30C  2    0.159646    0.767853    0.423561    10.50000   -1.50000
AFIX   0
PART 0
PART 2
C19   1    0.896114    0.695410    0.509273    10.50000    0.02467    0.07453 =
         0.03365   -0.01873    0.00953    0.00044
AFIX 137
H19A  2    0.904742    0.642747    0.506105    10.50000   -1.50000
H19B  2    0.964501    0.716559    0.527877    10.50000   -1.50000
H19C  2    0.879727    0.716175    0.469899    10.50000   -1.50000
AFIX   0

PART 0
K1    3    0.926749    0.555321    0.728552    11.00000    0.04736    0.03729 =
         0.03934   -0.00794    0.01403    0.00587
PART 1
O1    5    1.022188    0.491162    0.835111    10.50000    0.04608    0.18501 =
         0.12685    0.05424    0.01226    0.00094
C31   1    0.922792    0.511434    0.922596    10.50000    0.06047    0.16498 =
         0.12765    0.04834    0.02375   -0.00390
AFIX 137
H31A  2    0.883298    0.540135    0.891193    10.50000   -1.50000
H31B  2    0.945968    0.543064    0.955994    10.50000   -1.50000
H31C  2    0.874096    0.473418    0.935309    10.50000   -1.50000
AFIX   0
C32   1    1.011287    0.481062    0.902575    10.50000    0.06047    0.16498 =
         0.12765    0.04834    0.02375   -0.00390
AFIX  23
H32A  2    1.010028    0.428452    0.911173    10.50000   -1.20000
H32B  2    1.077874    0.501548    0.924751    10.50000   -1.20000
AFIX   0
C33   1    1.133262    0.459645    0.817613    10.50000    0.06047    0.16498 =
         0.12765    0.04834    0.02375   -0.00390
AFIX  23
H33A  2    1.187892    0.499401    0.817831    10.50000   -1.20000
H33B  2    1.161262    0.423739    0.847633    10.50000   -1.20000
AFIX   0
C34   1    1.124876    0.427235    0.763807    10.50000    0.06047    0.16498 =
         0.12765    0.04834    0.02375   -0.00390
AFIX 137
H34A  2    1.054356    0.440342    0.742206    10.50000   -1.50000
H34B  2    1.128773    0.374467    0.768745    10.50000   -1.50000
H34C  2    1.185461    0.443560    0.741727    10.50000   -1.50000
AFIX   0
PART 0
PART 2
O2    5    1.054330    0.466971    0.797622    10.50000    0.05554    0.05047 =
         0.06159    0.00854   -0.00872    0.00333
C35   1    1.115417    0.484223    0.852307    10.50000    0.10020    0.05650 =
         0.06961    0.01090   -0.02072    0.01261
AFIX  23
H35A  2    1.163892    0.442610    0.864095    10.50000   -1.20000
H35B  2    1.163537    0.526203    0.845966    10.50000   -1.20000
AFIX   0
C36   1    1.058758    0.499183    0.894803    10.50000    0.07797    0.12432 =
         0.08960   -0.06062   -0.02625   -0.03325
AFIX 137
H36A  2    1.035667    0.550085    0.892130    10.50000   -1.50000
H36B  2    1.103493    0.491068    0.932196    10.50000   -1.50000
H36C  2    0.993499    0.467912    0.892794    10.50000   -1.50000
AFIX   0
C37   1    1.138472    0.357231    0.765572    10.50000    0.06233    0.04146 =
         0.06862    0.02001   -0.01565   -0.00803
AFIX 137
H37A  2    1.205398    0.344102    0.790508    10.50000   -1.50000
H37B  2    1.158291    0.386458    0.732296    10.50000   -1.50000
H37C  2    1.100618    0.313048    0.750824    10.50000   -1.50000
AFIX   0
C38   1    1.078177    0.391863    0.794042    10.50000    0.10020    0.05650 =
         0.06961    0.01090   -0.02072    0.01261
AFIX  23
H38A  2    1.101308    0.377906    0.835242    10.50000   -1.20000
H38B  2    1.005055    0.369132    0.784628    10.50000   -1.20000
AFIX   0
PART 0
PART 3
O3    5    0.737826    0.482734    0.729304    10.50000    0.07423    0.07751 =
         0.07767   -0.02548    0.02950   -0.00875
O6    5    0.890214    0.426676    0.661739    10.50000    0.07423    0.07751 =
         0.07767   -0.02548    0.02950   -0.00875
O8    5    1.068319    0.521151    0.645099    10.50000    0.07423    0.07751 =
         0.07767   -0.02548    0.02950   -0.00875
O10   5    1.124963    0.629847    0.723251    10.50000    0.07423    0.07751 =
         0.07767   -0.02548    0.02950   -0.00875
O12   5    0.966459    0.687211    0.788222    10.50000    0.07423    0.07751 =
         0.07767   -0.02548    0.02950   -0.00875
O14   5    0.784343    0.600281    0.804662    10.50000    0.07423    0.07751 =
         0.07767   -0.02548    0.02950   -0.00875
C41   1    0.914165    0.694984    0.840286    10.50000    0.09897    0.08612 =
         0.08176   -0.03861    0.04460   -0.01320
AFIX  23
H41A  2    0.918088    0.746056    0.853717    10.50000   -1.20000
H41B  2    0.950740    0.664068    0.871786    10.50000   -1.20000
AFIX   0
C45   1    1.076167    0.711532    0.796839    10.50000    0.07495    0.04913 =
         0.04721   -0.01060    0.00144   -0.03506
AFIX  23
H45A  2    1.115883    0.683899    0.829454    10.50000   -1.20000
H45B  2    1.077130    0.763406    0.808083    10.50000   -1.20000
AFIX   0
C46   1    1.133907    0.702162    0.742153    10.50000    0.05278    0.06499 =
         0.04782   -0.00874   -0.01380   -0.00365
AFIX  23
H46A  2    1.100456    0.734615    0.710839    10.50000   -1.20000
H46B  2    1.212583    0.715383    0.750305    10.50000   -1.20000
AFIX   0
C47   1    1.189842    0.617215    0.677268    10.50000    0.06409    0.05168 =
         0.11185    0.00319    0.05889    0.00166
AFIX  23
H47A  2    1.267577    0.629064    0.690220    10.50000   -1.20000
H47B  2    1.165367    0.649113    0.643662    10.50000   -1.20000
AFIX   0
C48   1    1.181496    0.538060    0.657665    10.50000    0.05724    0.04866 =
         0.05711    0.01731    0.03811    0.00840
AFIX  23
H48A  2    1.221002    0.530839    0.622165    10.50000   -1.20000
H48B  2    1.215099    0.506070    0.689265    10.50000   -1.20000
AFIX   0
C49   1    1.060936    0.450044    0.621535    10.50000    0.09842    0.07694 =
         0.08342   -0.02877    0.04516   -0.00651
AFIX  23
H49A  2    1.095695    0.414867    0.650349    10.50000   -1.20000
H49B  2    1.099194    0.447360    0.585223    10.50000   -1.20000
AFIX   0
C50   1    0.939531    0.432756    0.607959    10.50000    0.09897    0.08612 =
         0.08176   -0.03861    0.04460   -0.01320
AFIX  23
H50A  2    0.903032    0.471759    0.583487    10.50000   -1.20000
H50B  2    0.930812    0.386653    0.585771    10.50000   -1.20000
AFIX   0
C59   1    0.793473    0.671786    0.826467    10.50000    0.09897    0.08612 =
         0.08176   -0.03861    0.04460   -0.01320
AFIX  23
H59A  2    0.755108    0.675335    0.862697    10.50000   -1.20000
H59B  2    0.756697    0.705356    0.796979    10.50000   -1.20000
AFIX   0
C60   1    0.675694    0.582036    0.785771    10.50000    0.07012    0.09896 =
         0.08320   -0.02182    0.02661   -0.00810
AFIX  23
H60A  2    0.650284    0.611080    0.750605    10.50000   -1.20000
H60B  2    0.627589    0.593374    0.817152    10.50000   -1.20000
AFIX   0
C62   1    0.667199    0.501546    0.770804    10.50000    0.06808    0.11257 =
         0.11005   -0.04691    0.04501   -0.04143
AFIX  23
H62A  2    0.685414    0.472670    0.806983    10.50000   -1.20000
H62B  2    0.590525    0.489950    0.755460    10.50000   -1.20000
AFIX   0
C65   1    0.724986    0.411053    0.709403    10.50000    0.05727    0.06934 =
         0.07511   -0.00516   -0.00205   -0.01008
AFIX  23
H65A  2    0.645725    0.399034    0.702060    10.50000   -1.20000
H65B  2    0.759135    0.377186    0.739466    10.50000   -1.20000
AFIX   0
C67   1    0.780669    0.403999    0.652708    10.50000    0.08713    0.05246 =
         0.06949   -0.02172    0.00750   -0.01997
AFIX  23
H67A  2    0.777847    0.352845    0.639460    10.50000   -1.20000
H67B  2    0.740913    0.433941    0.621557    10.50000   -1.20000
AFIX   0
PART 0
PART 4
O4    5    0.748065    0.502273    0.783862    10.50000    0.07423    0.07751 =
         0.07767   -0.02548    0.02950   -0.00875
O5    5    0.821134    0.421275    0.689527    10.50000    0.07423    0.07751 =
         0.07767   -0.02548    0.02950   -0.00875
O7    5    0.966469    0.480794    0.618626    10.50000    0.07423    0.07751 =
         0.07767   -0.02548    0.02950   -0.00875
O9    5    1.107268    0.591784    0.661780    10.50000    0.07423    0.07751 =
         0.07767   -0.02548    0.02950   -0.00875
O11   5    1.032610    0.683855    0.746578    10.50000    0.07423    0.07751 =
         0.07767   -0.02548    0.02950   -0.00875
O13   5    0.868332    0.624937    0.820759    10.50000    0.07423    0.07751 =
         0.07767   -0.02548    0.02950   -0.00875
C39   1    0.738521    0.534470    0.836689    10.50000    0.09897    0.08612 =
         0.08176   -0.03861    0.04460   -0.01320
AFIX  23
H39A  2    0.781761    0.505932    0.867528    10.50000   -1.20000
H39B  2    0.660310    0.532133    0.844931    10.50000   -1.20000
AFIX   0
C40   1    0.773954    0.608687    0.841647    10.50000    0.09897    0.08612 =
         0.08176   -0.03861    0.04460   -0.01320
AFIX  23
H40A  2    0.715711    0.639353    0.821136    10.50000   -1.20000
H40B  2    0.779666    0.622233    0.883791    10.50000   -1.20000
AFIX   0
C51   1    1.067590    0.488594    0.601211    10.50000    0.08921    0.08321 =
         0.07706   -0.02885    0.04747   -0.00745
AFIX  23
H51A  2    1.067217    0.474112    0.559431    10.50000   -1.20000
H51B  2    1.119862    0.456728    0.624974    10.50000   -1.20000
AFIX   0
C52   1    1.102468    0.562845    0.608109    10.50000    0.07032    0.08332 =
         0.08281   -0.02833    0.04226   -0.00550
AFIX  23
H52A  2    1.176590    0.566907    0.594034    10.50000   -1.20000
H52B  2    1.051908    0.592921    0.581716    10.50000   -1.20000
AFIX   0
C53   1    1.135904    0.660846    0.667518    10.50000    0.10062    0.07978 =
         0.08328   -0.01640    0.03616   -0.02180
AFIX  23
H53A  2    1.088721    0.689307    0.638242    10.50000   -1.20000
H53B  2    1.212824    0.665772    0.657511    10.50000   -1.20000
AFIX   0
C55   1    1.128520    0.693110    0.725143    10.50000    0.06911    0.05665 =
         0.07700   -0.01237    0.02274   -0.01550
AFIX  23
H55A  2    1.187002    0.672011    0.753073    10.50000   -1.20000
H55B  2    1.143093    0.745779    0.722509    10.50000   -1.20000
AFIX   0
C56   1    1.004385    0.704862    0.797506    10.50000    0.10364    0.07206 =
         0.07186    0.01076    0.04783    0.03082
AFIX  23
H56A  2    1.020600    0.757387    0.800966    10.50000   -1.20000
H56B  2    1.054187    0.680171    0.827989    10.50000   -1.20000
AFIX   0
C57   1    0.893790    0.694561    0.812888    10.50000    0.11292    0.07226 =
         0.13118    0.01226    0.07123    0.02170
AFIX  23
H57A  2    0.884522    0.721650    0.849541    10.50000   -1.20000
H57B  2    0.841634    0.715132    0.781341    10.50000   -1.20000
AFIX   0
C63   1    0.737170    0.432164    0.778542    10.50000    0.04777    0.09113 =
         0.09326   -0.02633    0.01379   -0.00524
AFIX  23
H63A  2    0.668133    0.417517    0.794906    10.50000   -1.20000
H63B  2    0.799025    0.408593    0.802572    10.50000   -1.20000
AFIX   0
C64   1    0.734644    0.405311    0.719126    10.50000    0.05751    0.06850 =
         0.10174   -0.02679    0.01282   -0.03265
AFIX  23
H64A  2    0.727294    0.351866    0.720300    10.50000   -1.20000
H64B  2    0.667540    0.424491    0.696547    10.50000   -1.20000
AFIX   0
C68   1    0.815493    0.406966    0.632910    10.50000    0.09036    0.06856 =
         0.08731   -0.02825    0.01651   -0.00439
AFIX  23
H68A  2    0.758425    0.438383    0.612238    10.50000   -1.20000
H68B  2    0.791630    0.356004    0.626623    10.50000   -1.20000
AFIX   0
C69   1    0.917638    0.417425    0.606867    10.50000    0.08476    0.06538 =
         0.03930   -0.01898   -0.00329    0.00293
AFIX  23
H69A  2    0.969264    0.378272    0.620773    10.50000   -1.20000
H69B  2    0.903055    0.412470    0.563648    10.50000   -1.20000
AFIX   0

PART 0
PART 2
C23A  1    0.346958    0.937632    0.474741    10.50000    0.10966    0.03303 =
         0.03629    0.01925    0.03289    0.02533
AFIX 137
H23D  2    0.267849    0.932980    0.478513    10.50000   -1.50000
H23E  2    0.358994    0.974975    0.445474    10.50000   -1.50000
H23F  2    0.385121    0.951426    0.512824    10.50000   -1.50000
AFIX   0
C24A  1    0.557890    0.868937    0.444205    10.50000    0.10966    0.03303 =
         0.03629    0.01925    0.03289    0.02533
AFIX 137
H24D  2    0.592734    0.883638    0.482828    10.50000   -1.50000
H24E  2    0.563964    0.908422    0.415952    10.50000   -1.50000
H24F  2    0.594908    0.825657    0.430778    10.50000   -1.50000
AFIX   0
SI3A  6    0.403148    0.847281    0.450275    10.50000    0.02849    0.04101 =
         0.03352   -0.01753    0.00520   -0.00490
C25A  1    0.346247    0.832847    0.373559    10.50000    0.10966    0.03303 =
         0.03629    0.01925    0.03289    0.02533
AFIX 137
H25D  2    0.377255    0.788338    0.358418    10.50000   -1.50000
H25E  2    0.365285    0.874163    0.349477    10.50000   -1.50000
H25F  2    0.265911    0.828355    0.371943    10.50000   -1.50000
AFIX   0
PART 0
PART -1
C27A  1    0.241809    0.672695    0.534450    10.50000    0.05547    0.05550 =
         0.05549   -0.00003    0.00526    0.00000
AFIX 137
H27D  2    0.250706    0.648640    0.496909    10.50000   -1.50000
H27E  2    0.166234    0.665731    0.544682    10.50000   -1.50000
H27F  2    0.293610    0.651742    0.565319    10.50000   -1.50000
AFIX   0
SI6A  6    0.270552    0.773122    0.527573    10.50000    0.04170    0.07844 =
         0.02656   -0.00063    0.00562    0.03498
C28A  1    0.264440    0.817755    0.601794    10.50000    0.03449    0.03703 =
         0.04518    0.00385    0.02625    0.00827
AFIX 137
H28D  2    0.318564    0.795025    0.630568    10.50000   -1.50000
H28E  2    0.190436    0.811834    0.614566    10.50000   -1.50000
H28F  2    0.281153    0.869531    0.598708    10.50000   -1.50000
AFIX   0
C30A  1    0.147468    0.803250    0.479901    10.50000    0.06838    0.09664 =
         0.05797   -0.00813   -0.00241    0.03951
AFIX 137
H30D  2    0.153581    0.855188    0.471675    10.50000   -1.50000
H30E  2    0.081144    0.794400    0.499981    10.50000   -1.50000
H30F  2    0.142598    0.776090    0.442842    10.50000   -1.50000
AFIX   0
PART 0
PART 2
N1A   4    0.544026    0.812204    0.624994    10.50000    0.05228    0.03220 =
         0.02759    0.00219    0.01362    0.01750
N2A   4    0.499165    0.671333    0.619582    10.50000    0.02565    0.01834 =
         0.01024   -0.00230    0.00457   -0.00461
C1A   1    0.580022    0.881813    0.630626    10.50000    0.02191    0.03408 =
         0.03046   -0.00851    0.01229    0.00255
AFIX  43
H1A   2    0.601739    0.904766    0.596296    10.50000   -1.20000
AFIX   0
C2A   1    0.587831    0.922033    0.681618    10.50000    0.02361    0.02211 =
         0.02617   -0.00586   -0.00003    0.00846
AFIX  43
H2A   2    0.606328    0.972056    0.680815    10.50000   -1.20000
AFIX   0
C3A   1    0.568428    0.888847    0.734285    10.50000    0.04427    0.02774 =
         0.01987   -0.01216   -0.00719    0.00759
AFIX  43
H3A   2    0.569120    0.915775    0.769800    10.50000   -1.20000
AFIX   0
C4A   1    0.548094    0.815163    0.732965    10.50000    0.04898    0.02412 =
         0.02092   -0.00809   -0.00753    0.01442
AFIX  43
H4A   2    0.542443    0.789212    0.768508    10.50000   -1.20000
AFIX   0
C5A   1    0.535600    0.778202    0.677586    10.50000    0.02405    0.02188 =
         0.01938   -0.00755   -0.00497    0.00900
C6A   1    0.513719    0.703505    0.675236    10.50000    0.03519    0.02369 =
         0.01248   -0.00683    0.00455    0.00794
C7A   1    0.511775    0.661780    0.726085    10.50000    0.04967    0.02509 =
         0.01665   -0.00505    0.00057   -0.00679
AFIX  43
H7A   2    0.517537    0.684368    0.763655    10.50000   -1.20000
AFIX   0
C8A   1    0.501564    0.588492    0.721463    10.50000    0.03733    0.02506 =
         0.02241   -0.00184    0.00734   -0.00529
AFIX  43
H8A   2    0.500799    0.559256    0.755692    10.50000   -1.20000
AFIX   0
C9A   1    0.492184    0.556756    0.665383    10.50000    0.03258    0.01629 =
         0.02359   -0.00022    0.00907   -0.00291
AFIX  43
H9A   2    0.485169    0.505643    0.661303    10.50000   -1.20000
AFIX   0
C10A  1    0.493171    0.599291    0.617068    10.50000    0.02079    0.01869 =
         0.01863   -0.00371    0.00877    0.00052
AFIX  43
H10A  2    0.489403    0.576615    0.579562    10.50000   -1.20000
AFIX   0
HKLF 4


REM  gwx052a_0m_a.res in P2(1)/c
REM wR2 = 0.2596, GooF = S = 1.086, Restrained GooF = 1.015 for all data
REM R1 = 0.1281 for 7347 Fo > 4sig(Fo) and 0.1506 for all 8987 data
REM 693 parameters refined using 1954 restraints

END

WGHT      0.0002    100.6596

REM Highest difference peak  1.777,  deepest hole -1.895,  1-sigma level  0.151
Q1    1   0.7662  0.7426  0.5377  11.00000  0.05    1.78
Q2    1   0.4738  0.8592  0.4554  11.00000  0.05    1.76
Q3    1   0.7818  0.6968  0.5800  11.00000  0.05    1.71
Q4    1   0.8370  0.5812  0.8380  11.00000  0.05    1.70
Q5    1   0.2908  0.8109  0.5260  11.00000  0.05    1.63
Q6    1   0.9947  0.5228  0.6258  11.00000  0.05    1.51
Q7    1   1.0964  0.6814  0.7738  11.00000  0.05    1.34
Q8    1   0.8647  0.4216  0.6667  11.00000  0.05    1.33
Q9    1   0.7455  0.5557  0.7713  11.00000  0.05    1.25
Q10   1   1.0912  0.6220  0.6981  11.00000  0.05    1.21
Q11   1   0.7387  0.4745  0.8333  11.00000  0.05    1.19
Q12   1   0.7431  0.4719  0.7708  11.00000  0.05    1.15
Q13   1   0.2331  0.6965  0.5126  11.00000  0.05    1.10
Q14   1   0.1857  0.8606  0.4788  11.00000  0.05    1.06
Q15   1   1.1367  0.6336  0.7365  11.00000  0.05    1.04
Q16   1   0.7834  0.4664  0.6780  11.00000  0.05    1.03
Q17   1   1.1218  0.6224  0.6323  11.00000  0.05    0.96
Q18   1   0.8362  0.6618  0.8549  11.00000  0.05    0.95
Q19   1   0.9638  0.7006  0.8421  11.00000  0.05    0.94
Q20   1   0.7383  0.5578  0.8524  11.00000  0.05    0.90
;
_shelx_res_checksum              94340
_shelx_hkl_file                  
;
   2   0   0 3135.29   91.59
  -2   0   0 3178.08   90.99
  -2   0   0 3076.79   91.49
  -2   0   0 3218.08   91.19
  -2   0   0 3277.07   91.69
   2   0   0 3171.98   90.99
   2   0   0 3338.47   91.79
   2   0   0 3149.19   91.29
  -3   0   0 4884.31  139.19
   3   0   0 4880.21  139.79
  -3   0   0 4790.92  139.79
  -3   0   0 4726.53  139.39
  -3   0   0 4990.40  139.99
   3   0   0 4946.10  138.99
   3   0   0 4921.01  140.09
   4   0   0 1317.77   39.50
   4   0   0 1268.17   38.00
   4   0   0 1232.58   39.10
  -4   0   0 1294.27   37.90
  -4   0   0 1222.88   39.20
  -4   0   0 1266.67   38.20
  -4   0   0 1271.87   39.50
  -5   0   0 1246.18   37.50
   5   0   0 1218.98   37.30
   5   0   0 1181.98   38.60
  -5   0   0 1202.68   37.10
  -5   0   0 1241.28   39.10
  -5   0   0 1186.28   39.30
   5   0   0 1260.17   39.20
  -6   0   0  361.26   18.10
  -6   0   0  382.26   15.10
  -6   0   0  361.26   14.70
   6   0   0  370.76   15.30
  -6   0   0  390.56   17.90
   6   0   0  396.46   17.50
   6   0   0  365.76   17.10
  -7   0   0  974.60   35.10
   7   0   0 1008.90   34.40
  -7   0   0  970.00   31.60
  -7   0   0  970.00   34.80
  -7   0   0  931.51   31.30
   7   0   0  943.11   31.70
   7   0   0  945.61   33.60
  -8   0   0  369.76   16.10
   8   0   0  317.27   19.60
  -8   0   0  351.46   22.10
  -8   0   0  370.06   16.60
   8   0   0  356.56   17.30
   8   0   0  340.27   19.80
  -8   0   0  352.26   21.90
  -9   0   0   10.20   13.40
  -9   0   0   26.00    7.40
   9   0   0   29.00   10.20
   9   0   0   10.70    8.70
  -9   0   0    9.60   12.50
   9   0   0   15.00   10.80
  10   0   0   10.50   12.40
 -10   0   0   -4.70   14.70
 -10   0   0   12.00    8.50
 -10   0   0   25.80   16.00
  10   0   0    8.30   11.00
  10   0   0   -0.60   10.90
 -11   0   0  -11.30   19.40
  11   0   0   -5.40   14.80
 -11   0   0   10.90   11.00
  11   0   0   14.10   14.00
 -11   0   0   -0.10   17.80
  11   0   0   28.60   17.00
  12   0   0    9.10   17.20
  12   0   0   15.80   16.80
 -12   0   0  -16.20   23.60
  12   0   0   -8.20   17.70
 -12   0   0   -4.90   12.80
 -12   0   0  -16.80   22.40
 -13   0   0    0.10   27.30
  13   0   0   19.60   22.10
 -13   0   0   17.00   28.60
  13   0   0   20.50   20.50
  13   0   0    2.30   20.70
  14   0   0  -16.40   25.70
 -14   0   0   20.00   36.30
 -14   0   0   82.89   36.10
  14   0   0  -68.39   26.90
  14   0   0   33.60   24.90
  15   0   0   -9.00   31.60
  15   0   0   22.50   31.60
  15   0   0  -19.50   29.80
 -15   0   0   33.60   42.50
  -2  -1   0  100.09    6.40
   2  -1   0  101.79    6.30
  -2  -1   0  100.99    6.50
   2  -1   0   92.69    6.90
   2  -1   0   89.79    6.40
  -2   1   0   86.89    6.50
  -2   1   0  102.89    6.20
   2   1   0   98.79    6.30
  -2   1   0  102.89    6.20
   2   1   0   94.49    5.60
  -3  -1   0  750.42   23.80
  -3  -1   0  730.53   22.70
  -3  -1   0  712.93   23.60
   3  -1   0  694.43   23.60
   3  -1   0  711.23   23.40
   3  -1   0  745.03   23.60
   3   1   0  721.83   22.70
  -3   1   0  725.13   23.40
   3   1   0  718.43   23.40
  -3   1   0  727.53   23.20
  -3   1   0  731.33   23.60
   3   1   0  749.82   23.70
   4  -1   0  292.87   11.20
  -4  -1   0  299.97   11.80
  -4  -1   0  301.87   13.80
   4  -1   0  317.07   13.30
  -4   1   0  329.07   13.60
   4   1   0  304.97   12.10
  -4   1   0  305.47   11.10
  -4   1   0  326.57   12.60
  -4   1   0  323.07   13.60
   5  -1   0  193.88   11.60
   5  -1   0  188.18   11.50
   5  -1   0  196.88    9.30
  -5  -1   0  164.28   12.70
  -5  -1   0  175.28    9.40
  -5  -1   0  180.98   12.40
  -5   1   0  189.78   11.90
  -5   1   0  209.18   10.50
  -5   1   0  183.48    8.60
  -5   1   0  173.18   12.20
   5   1   0  194.18   10.10
   5   1   0  194.38   11.60
   5   1   0  182.28   11.80
  -6  -1   0   73.69    9.40
  -6  -1   0   73.49    9.90
   6  -1   0   67.49    8.30
   6  -1   0  105.29   10.70
  -6  -1   0   81.29    8.20
   6  -1   0   85.89    8.30
  -6   1   0   57.89    6.00
  -6   1   0   86.39    8.80
   6   1   0   95.89   11.10
   6   1   0   80.49    9.30
   6   1   0   96.59   11.10
  -6   1   0   77.99    9.20
  -6   1   0   63.69    8.90
  -7  -1   0 1268.77   41.80
  -7  -1   0 1237.38   41.90
   7  -1   0 1207.08   41.00
   7  -1   0 1135.39   37.90
   7  -1   0 1166.18   40.50
  -7  -1   0 1195.18   38.60
  -7   1   0 1196.28   41.30
   7   1   0 1201.98   40.90
  -7   1   0 1200.58   38.70
   7   1   0 1212.58   39.00
  -7   1   0 1171.18   37.80
   7   1   0 1265.17   40.50
  -7   1   0 1219.08   41.00
   8  -1   0 2310.67   71.79
  -8  -1   0 2344.87   73.19
  -8  -1   0 2270.27   69.49
   8  -1   0 2267.27   72.09
   8  -1   0 2215.28   68.89
  -8   1   0 2306.57   72.09
   8   1   0 2272.37   69.79
  -8   1   0 2257.07   68.69
   8   1   0 2359.36   72.39
  -8   1   0 2308.77   69.59
  -8   1   0 2263.97   72.49
  -9  -1   0  273.37   16.10
   9  -1   0  293.07   19.90
  -9  -1   0  334.27   24.60
   9  -1   0  286.77   20.20
  -9  -1   0  299.87   22.90
   9  -1   0  283.57   17.40
  -9   1   0  272.97   24.30
   9   1   0  295.77   18.60
  -9   1   0  270.07   22.00
  -9   1   0  277.47   16.70
   9   1   0  296.57   19.90
   9   1   0  297.57   19.80
  -9   1   0  280.87   15.30
  10  -1   0   42.80   11.30
 -10  -1   0   39.90   10.00
  10  -1   0   32.40   13.70
 -10  -1   0   48.70   16.70
 -10  -1   0   47.90   17.10
  10  -1   0   64.29   13.30
 -10   1   0   86.89   16.30
  10   1   0   72.89   15.40
 -10   1   0   58.99    9.10
  10   1   0   60.79   13.70
 -10   1   0   42.70   14.80
 -10   1   0   58.79   10.50
  10   1   0   70.99   13.30
 -11  -1   0  320.37   31.70
 -11  -1   0  341.27   21.30
 -11  -1   0  282.47   32.00
  11  -1   0  297.57   26.20
  11  -1   0  310.77   25.30
  11  -1   0  307.77   24.20
  11   1   0  368.06   25.90
 -11   1   0  256.67   27.10
 -11   1   0  323.17   20.10
  11   1   0  332.67   26.60
  11   1   0  348.97   25.10
 -11   1   0  353.46   32.30
 -11   1   0  311.47   21.30
 -12  -1   0  245.68   28.10
 -12  -1   0  246.18   22.70
  12  -1   0  239.18   27.10
  12  -1   0  280.97   29.50
 -12  -1   0  302.77   36.10
  12  -1   0  207.48   23.10
  12   1   0  247.38   29.00
  12   1   0  224.58   27.90
 -12   1   0  238.38   27.40
  12   1   0  249.68   26.90
 -12   1   0  246.88   22.10
 -12   1   0  236.78   28.00
 -12   1   0  196.48   28.40
 -13  -1   0   20.30   29.10
  13  -1   0  -38.10   20.00
 -13  -1   0  -49.90   28.90
  13  -1   0   13.40   22.30
  13  -1   0  -16.60   20.20
 -13   1   0  -10.40   28.80
  13   1   0  -20.60   19.50
  13   1   0  -17.70   21.10
  13   1   0    4.50   20.80
 -13   1   0   95.99   27.90
  14  -1   0   12.70   23.20
  14  -1   0  -27.50   26.40
 -14  -1   0   -6.60   38.70
 -14  -1   0  -66.59   34.30
  14   1   0  -14.30   26.70
 -14   1   0  -27.60   34.50
  14   1   0   11.70   27.50
  14   1   0  -17.00   23.50
 -14   1   0   20.20   33.40
  15  -1   0   99.89   38.00
  15  -1   0   96.79   32.60
  15   1   0   81.89   32.10
  15   1   0   46.90   32.40
  15   1   0   26.80   34.50
 -15   1   0   81.69   45.20
   0  -2   0 2929.51   78.19
   0  -2   0 2536.55   78.39
   1  -2   0 7192.68  207.28
   1  -2   0 7284.17  207.28
  -1  -2   0 7345.46  206.88
   1  -2   0 7260.37  206.78
  -1   2   0 7435.06  207.28
   1   2   0 7237.08  207.48
  -1   2   0 7236.48  206.68
   1   2   0 7552.44  206.78
  -1   2   0 7127.39  207.28
   2  -2   0   45.90    5.30
   2  -2   0   38.10    5.00
  -2  -2   0   37.50    4.80
  -2  -2   0   36.10    3.90
  -2   2   0   41.40    4.90
   2   2   0   40.90    4.80
  -2   2   0   47.40    5.50
   2   2   0   45.40    4.60
  -2   2   0   33.10    4.50
   2   2   0   43.50    5.50
   3  -2   0 4375.56  125.19
   3  -2   0 4183.98  125.49
  -3  -2   0 4408.56  125.39
  -3  -2   0 4402.26  124.79
  -3  -2   0 4344.27  125.79
   3  -2   0 4349.46  125.19
  -3   2   0 4196.58  125.19
   3   2   0 4346.57  125.49
   3   2   0 4503.05  125.19
  -3   2   0 4474.35  125.19
   3   2   0 4410.16  124.79
  -3   2   0 4193.98  124.89
  -4  -2   0 1620.14   49.60
   4  -2   0 1608.84   49.00
  -4  -2   0 1609.94   49.20
   4  -2   0 1582.94   48.90
  -4  -2   0 1642.94   48.20
   4  -2   0 1559.74   49.30
   4   2   0 1662.03   48.30
  -4   2   0 1552.84   48.50
  -4   2   0 1569.84   48.80
  -4   2   0 1642.74   49.10
   4   2   0 1609.54   49.10
   4   2   0 1635.74   49.10
  -5  -2   0   80.69    9.10
  -5  -2   0   72.59    7.50
  -5  -2   0   71.29    8.50
   5  -2   0   77.39    9.20
   5  -2   0   79.79    9.50
   5   2   0   91.09    9.10
   5   2   0   75.39   13.00
  -5   2   0   67.59    8.10
   5   2   0   80.19    8.30
  -5   2   0   82.09    8.70
  -5   2   0   85.99    8.40
   6  -2   0  466.85   19.70
  -6  -2   0  437.26   20.90
  -6  -2   0  417.26   20.40
  -6  -2   0  468.35   17.80
  -6   2   0  468.75   18.30
   6   2   0  452.05   18.40
  -6   2   0  452.05   19.80
  -6   2   0  461.55   20.10
   6   2   0  454.35   19.60
   6   2   0  492.05   19.90
   7  -2   0   77.79   10.30
  -7  -2   0   99.19    9.90
  -7  -2   0  105.49   12.40
   7  -2   0   75.69   10.10
  -7  -2   0  115.19   12.30
  -7   2   0  129.59   11.30
  -7   2   0   90.09   10.70
   7   2   0  152.68   13.30
   7   2   0  122.79   13.10
  -7   2   0   98.19   11.20
   7   2   0  118.89   11.40
   8  -2   0  617.94   26.40
   8  -2   0  625.24   23.10
  -8  -2   0  632.14   28.50
  -8  -2   0  578.14   28.90
  -8  -2   0  621.64   23.90
  -8   2   0  604.34   27.40
   8   2   0  599.04   26.30
  -8   2   0  620.84   24.40
  -8   2   0  608.64   22.20
   8   2   0  640.14   26.60
   8   2   0  629.94   24.90
  -8   2   0  607.14   27.60
  -9  -2   0   21.40   14.10
  -9  -2   0   22.90   13.40
  -9  -2   0   16.70    7.50
   9  -2   0   31.50   10.70
   9  -2   0   26.50    8.60
   9  -2   0   11.60   11.10
  -9   2   0   24.70    8.70
  -9   2   0   28.80   12.40
  -9   2   0   12.00   14.20
   9   2   0    4.70   11.30
   9   2   0   -2.60   10.20
   9   2   0   26.50    9.70
 -10  -2   0   55.59   17.00
 -10  -2   0    8.40    9.20
 -10  -2   0   -6.30   14.80
  10  -2   0    1.70   11.40
  10  -2   0    3.70   13.00
  10   2   0   16.60   12.40
 -10   2   0    9.00    9.60
 -10   2   0   10.30   14.70
  10   2   0  -12.90   11.30
 -10   2   0   20.20   14.80
  10   2   0    1.70   11.60
 -11  -2   0   -3.00   10.90
  11  -2   0   26.20   13.10
  11  -2   0  -11.20   15.30
 -11  -2   0  -13.90   18.50
  11  -2   0    9.30   14.00
 -11  -2   0   -5.40   20.10
 -11   2   0   14.10   11.10
  11   2   0    8.70   13.70
 -11   2   0   20.30   18.50
  11   2   0  -10.10   13.40
 -11   2   0    3.90   18.00
  11   2   0    4.30   15.00
 -11   2   0   22.20   14.50
  12  -2   0   85.99   20.30
 -12  -2   0  104.99   15.30
 -12  -2   0  120.79   24.70
 -12  -2   0   92.69   26.20
  12  -2   0   92.59   19.50
 -12   2   0  116.99   24.50
 -12   2   0  100.49   15.40
  12   2   0   81.19   19.60
 -12   2   0  110.29   24.30
  12   2   0   90.39   17.90
 -12   2   0  103.19   19.30
  12   2   0  128.19   20.00
 -13  -2   0   25.40   15.70
  13  -2   0   69.59   20.50
 -13  -2   0   36.80   47.20
 -13  -2   0   17.00   32.20
  13  -2   0   50.29   23.20
 -13   2   0   35.20   15.80
  13   2   0   44.30   22.00
 -13   2   0  -51.29   25.30
  13   2   0   40.60   22.80
 -13   2   0   41.60   28.80
 -13   2   0   -0.50   21.10
  13   2   0   13.50   19.70
  14  -2   0   17.60   24.90
 -14  -2   0   21.10   35.40
  14  -2   0   57.59   28.50
 -14  -2   0   27.60   38.80
  14   2   0    8.40   27.30
 -14   2   0  -20.40   26.20
  14   2   0   46.50   26.20
 -14   2   0   73.29   35.00
  14   2   0  -40.40   24.20
 -14   2   0   56.99   18.70
 -14   2   0   39.10   36.00
  15  -2   0   44.30   33.00
  15  -2   0   32.70   30.10
  15   2   0  -33.40   35.70
  15   2   0    5.20   30.00
  15   2   0   27.90   31.80
 -15   2   0   38.60   45.80
   0  -3   0   10.00    3.10
   0  -3   0    4.70    2.10
   0   3   0    6.10    2.30
   0   3   0    6.40    2.80
   0   3   0    3.40    3.60
   0   3   0    2.30    2.50
   1  -3   0    1.80    2.70
  -1  -3   0   -1.20    3.20
  -1  -3   0    0.90    2.70
   1  -3   0    6.40    4.10
  -1   3   0    4.20    3.60
  -1   3   0   -4.20    3.90
  -1   3   0    3.50    2.50
   1   3   0    1.20    3.10
   1   3   0    3.60    2.80
   2  -3   0    5.90    3.10
   2  -3   0    3.00    3.90
  -2  -3   0    3.30    4.30
  -2  -3   0    4.70    2.90
   2  -3   0    7.80    4.30
  -2   3   0    1.30    3.00
   2   3   0    5.50    3.30
  -2   3   0    0.60    4.00
   2   3   0    3.10    3.90
   2   3   0    4.50    3.60
  -2   3   0   -1.90    3.40
   3  -3   0  103.49    7.10
   3  -3   0   96.89    9.40
  -3  -3   0   94.39    6.70
  -3  -3   0  107.69    8.70
   3  -3   0   79.99    7.80
   3   3   0  108.69    7.80
   3   3   0  100.89    7.20
  -3   3   0   99.09    7.20
   3   3   0   89.99    7.50
  -3   3   0   96.69    7.80
  -3   3   0   87.59    7.80
   4  -3   0 1567.14   50.39
  -4  -3   0 1679.33   51.49
  -4  -3   0 1658.13   49.80
   4  -3   0 1666.63   50.59
   4  -3   0 1654.73   51.39
  -4  -3   0 1680.43   50.89
  -4   3   0 1671.43   50.29
   4   3   0 1670.03   49.90
  -4   3   0 1649.83   50.09
   4   3   0 1639.74   50.69
   4   3   0 1674.43   50.29
  -4   3   0 1629.34   50.49
   5  -3   0  288.87   13.90
  -5  -3   0  249.38   12.50
  -5   3   0  303.07   13.80
   5   3   0  280.27   14.90
  -5   3   0  292.57   14.50
   5   3   0  271.77   13.20
  -6  -3   0  274.57   13.60
  -6  -3   0  271.07   16.90
  -6  -3   0  261.67   17.00
   6  -3   0  258.27   15.40
   6  -3   0  290.87   15.10
  -6   3   0  273.77   15.50
  -6   3   0  252.57   14.20
   6   3   0  263.97   15.90
   6   3   0  305.77   15.10
   6   3   0  268.57   14.30
  -6   3   0  299.57   15.70
   7  -3   0  821.62   31.20
  -7  -3   0  810.32   29.30
  -7   3   0  834.72   29.90
  -7   3   0  829.32   31.30
   7   3   0  838.92   29.90
  -7   3   0  917.81   31.50
   7   3   0  850.71   31.20
  -8  -3   0  934.01   43.50
  -8  -3   0 1028.20   35.40
   8  -3   0  954.60   37.40
  -8  -3   0  961.30   39.30
   8  -3   0 1073.29   38.20
   8   3   0 1081.89   37.60
   8   3   0 1064.69   36.50
  -8   3   0 1044.70   38.10
  -8   3   0 1012.70   37.90
  -8   3   0 1043.60   36.10
   8   3   0 1056.29   37.60
   9  -3   0  397.16   24.30
  -9  -3   0  418.46   26.20
  -9  -3   0  416.26   20.60
  -9  -3   0  393.76   28.70
   9  -3   0  416.46   23.60
  -9   3   0  430.86   26.70
  -9   3   0  455.25   21.80
   9   3   0  475.05   24.00
   9   3   0  448.06   23.20
  -9   3   0  446.06   25.30
   9   3   0  362.06   23.50
  10  -3   0   72.89   15.30
 -10  -3   0   47.00   16.00
 -10  -3   0   49.70   18.90
  10  -3   0   66.99   13.90
 -10  -3   0   62.99   11.20
 -10   3   0   60.59   15.70
  10   3   0   47.20   12.70
 -10   3   0   61.29   11.20
  10   3   0   67.99   13.90
  10   3   0   79.49   13.40
 -10   3   0   44.80   17.80
 -11  -3   0  469.75   35.80
  11  -3   0  546.05   32.10
 -11  -3   0  531.05   27.00
 -11  -3   0  506.55   38.80
  11  -3   0  446.56   30.90
  11   3   0  519.45   30.00
  11   3   0  515.25   31.00
 -11   3   0  529.45   34.10
 -11   3   0  532.65   35.40
 -11   3   0  587.94   27.60
  11   3   0  540.15   30.60
  12  -3   0  226.28   24.60
  12  -3   0  234.88   28.20
 -12  -3   0  241.88   30.00
 -12  -3   0  256.07   22.80
 -12  -3   0  203.58   28.80
  12   3   0  185.28   21.20
 -12   3   0  259.87   24.00
 -12   3   0  198.68   26.40
 -12   3   0  238.78   27.20
  12   3   0  186.88   22.20
 -12   3   0  242.08   28.70
  12   3   0  175.68   28.50
 -13  -3   0  249.28   32.60
  13  -3   0  159.08   25.20
 -13  -3   0  204.28   20.70
 -13  -3   0  184.38   36.70
  13  -3   0  225.08   27.00
  13   3   0  170.78   25.70
 -13   3   0  124.89   30.60
  13   3   0  204.48   25.60
  13   3   0  197.48   24.20
 -13   3   0  223.48   26.10
 -13   3   0  155.78   31.10
 -13   3   0  183.78   24.10
 -14  -3   0   46.60   38.20
  14  -3   0  104.49   33.70
  14  -3   0   74.19   28.80
 -14  -3   0  -10.20   51.39
 -14   3   0   56.39   18.50
  14   3   0   80.89   29.30
  14   3   0   37.80   26.10
 -14   3   0   -6.10   37.30
  14   3   0   60.89   26.10
 -14   3   0   84.19   35.70
 -14   3   0   45.70   27.60
  15  -3   0   63.19   32.00
  15  -3   0   76.69   35.10
  15   3   0  126.89   32.90
 -15   3   0   53.69   31.60
 -15   3   0  170.98   46.90
 -15   3   0  129.49   36.70
  15   3   0   81.29   37.10
  15   3   0   52.09   30.90
   0  -4   0   19.40    4.20
   0  -4   0   15.80    4.60
   0   4   0    7.50    3.50
   0   4   0   16.10    3.50
   0   4   0   20.80    3.20
   0   4   0   13.00    4.70
  -1  -4   0  889.21   28.10
  -1  -4   0  968.40   28.00
  -1  -4   0  906.81   27.60
   1  -4   0  933.71   29.50
   1  -4   0  897.11   27.90
   1  -4   0  933.41   29.10
   1   4   0  965.20   28.10
  -1   4   0  898.01   29.40
  -1   4   0  891.01   27.60
  -1   4   0  928.11   28.70
   1   4   0  876.11   27.70
   1   4   0  875.01   29.50
   2  -4   0  331.27   14.10
   2  -4   0  327.67   13.70
   2  -4   0  330.87   12.20
  -2  -4   0  306.27   12.60
  -2  -4   0  323.37   12.30
   2   4   0  333.77   12.30
  -2   4   0  328.07   13.20
  -2   4   0  326.17   13.70
  -2   4   0  323.87   11.90
   2   4   0  328.17   13.70
   2   4   0  351.06   12.50
  -3  -4   0   38.10    6.50
   3  -4   0   52.19    6.20
   3  -4   0   51.89    7.00
  -3  -4   0   53.49    5.30
   3  -4   0   41.40    5.80
  -3   4   0   58.99    6.40
  -3   4   0   43.40    6.20
  -3   4   0   44.30    5.90
   3   4   0   53.09    5.60
   3   4   0   40.50    5.70
   3   4   0   58.69    5.80
  -4  -4   0 2536.15   76.39
  -4  -4   0 2369.86   77.39
   4  -4   0 2477.95   75.99
   4  -4   0 2452.35   75.19
  -4  -4   0 2589.54   74.49
   4  -4   0 2523.25   74.89
  -4   4   0 2524.85   74.49
  -4   4   0 2488.15   75.19
   4   4   0 2581.64   74.69
  -4   4   0 2462.25   74.69
   4   4   0 2601.34   74.59
   4   4   0 2596.94   75.59
  -5  -4   0  862.31   30.90
  -5  -4   0  877.31   28.90
  -5  -4   0  854.61   31.40
   5  -4   0  821.42   30.10
   5  -4   0  868.21   29.80
   5  -4   0  831.12   31.40
  -5   4   0  884.71   29.80
   5   4   0  844.52   29.80
   5   4   0  888.91   30.30
  -5   4   0  904.31   29.90
   5   4   0  875.01   29.00
  -5   4   0  852.51   29.50
  -6  -4   0   83.39   10.70
   6  -4   0   81.29    9.60
   6  -4   0  105.69   10.60
  -6  -4   0   72.99   10.60
  -6  -4   0   78.19    9.20
  -6   4   0   86.39    9.60
   6   4   0  102.59   13.10
   6   4   0   89.19   10.50
  -6   4   0   81.89    9.30
   6   4   0   88.39   10.80
  -6   4   0   84.69   10.60
  -7  -4   0  274.17   19.10
  -7  -4   0  256.27   14.40
   7  -4   0  254.87   15.90
   7  -4   0  242.88   17.50
  -7  -4   0  264.07   20.20
   7   4   0  277.67   16.20
  -7   4   0  264.07   15.60
   7   4   0  275.77   15.90
  -7   4   0  247.88   17.10
   7   4   0  262.97   16.40
  -7   4   0  257.07   16.70
  -8  -4   0   65.89   13.30
   8  -4   0   52.39   12.00
  -8  -4   0   82.19    9.50
  -8  -4   0   60.69   14.10
   8  -4   0   57.99   10.70
  -8   4   0   91.69   13.10
   8   4   0   70.89   11.10
  -8   4   0   97.39   10.80
   8   4   0   71.09   11.00
  -8   4   0   69.89   12.00
   8   4   0   65.59   12.80
  -9  -4   0  117.59   16.90
  -9  -4   0  110.59   11.90
  -9  -4   0  101.09   18.00
   9  -4   0  138.79   17.80
   9  -4   0   81.49   14.30
   9   4   0  105.59   13.60
  -9   4   0   74.99   14.30
   9   4   0   84.49   12.90
  -9   4   0  109.99   12.20
   9   4   0  114.79   13.80
  -9   4   0   46.30   20.40
 -10  -4   0    5.30   18.50
 -10  -4   0   36.30   10.50
 -10  -4   0   37.10   17.30
  10  -4   0   30.70   13.70
  10  -4   0    7.30   15.40
  10   4   0   21.20   12.80
  10   4   0   41.20   13.00
 -10   4   0   25.50   15.50
 -10   4   0   30.00   15.90
 -10   4   0   42.60   11.10
  10   4   0   45.00   13.30
  11  -4   0    5.00   16.70
  11  -4   0   17.80   15.50
 -11  -4   0    6.60   11.30
 -11  -4   0   24.20   20.80
 -11  -4   0   42.40   21.80
 -11   4   0   64.39   13.30
  11   4   0   31.90   14.80
  11   4   0   21.50   15.40
 -11   4   0   55.89   18.60
 -11   4   0   40.80   19.00
  11   4   0   15.70   16.00
 -12  -4   0   31.60   14.40
  12  -4   0   59.19   21.70
  12  -4   0   47.60   18.10
 -12  -4   0   23.70   25.30
 -12  -4   0   58.59   26.30
  12   4   0   93.79   21.90
 -12   4   0   23.40   21.90
 -12   4   0   33.00   14.80
 -12   4   0   31.50   22.60
 -12   4   0   62.39   19.10
  12   4   0   18.00   16.30
  12   4   0   51.69   19.80
  13  -4   0   12.40   21.60
 -13  -4   0   14.40   18.20
 -13  -4   0   46.00   29.70
 -13  -4   0  -20.50   32.90
  13  -4   0   53.49   25.60
 -13   4   0   27.20   28.10
  13   4   0   26.90   21.30
 -13   4   0   -1.90   15.40
  13   4   0   11.50   19.50
  13   4   0   20.80   23.30
 -13   4   0  -20.10   21.90
 -13   4   0   -9.20   26.40
  14  -4   0  -41.30   25.10
  14  -4   0   10.10   29.80
 -14  -4   0   26.10   37.70
 -14   4   0  -90.79   36.40
  14   4   0   43.80   31.30
  14   4   0   30.10   27.10
 -14   4   0   56.09   28.20
 -14   4   0   43.30   21.70
 -14   4   0   64.69   37.10
  14   4   0   18.10   24.80
  15  -4   0   47.10   33.00
  15  -4   0  166.58   38.80
  15   4   0   91.69   33.00
 -15   4   0   62.69   22.70
 -15   4   0  104.89   45.60
  15   4   0   60.99   31.20
 -15   4   0   64.09   37.30
   0  -5   0    5.80    2.60
   0  -5   0    6.80    4.50
   0  -5   0    3.70    4.00
   0   5   0    8.80    3.70
   0   5   0    5.30    3.20
   0   5   0    4.40    4.90
   0   5   0    4.50    2.90
   1  -5   0  135.69    6.60
  -1  -5   0  152.38    7.40
   1  -5   0  144.99    9.80
  -1  -5   0  142.99    8.60
   1  -5   0  153.68    9.70
   1  -5   0  145.49    7.70
  -1  -5   0  153.98    8.10
   1   5   0  153.28    7.10
  -1   5   0  142.99    8.40
   1   5   0  146.69   10.10
  -1   5   0  139.59    7.30
  -1   5   0  155.48    6.40
  -1   5   0  147.79   10.30
   1   5   0  156.98    7.80
   1   5   0  135.99    7.90
   2  -5   0   70.29    7.30
   2  -5   0   58.09    6.80
  -2  -5   0   67.39    6.20
  -2  -5   0   69.69    7.70
   2  -5   0   74.29    6.30
   2   5   0   68.99    6.80
  -2   5   0   64.79    7.20
  -2   5   0   66.19    6.00
   2   5   0   64.59    8.00
  -2   5   0   65.29    7.40
   2   5   0   64.89    6.80
  -3  -5   0  559.34   21.70
   3  -5   0  636.54   23.60
  -3  -5   0  636.34   21.30
   3  -5   0  638.44   21.40
   3  -5   0  613.34   22.70
   3   5   0  636.04   21.30
   3   5   0  653.93   21.50
  -3   5   0  610.44   22.20
   3   5   0  615.34   22.70
  -3   5   0  622.24   22.60
  -3   5   0  642.44   21.00
  -4  -5   0  125.79    9.00
   4  -5   0  143.99   12.80
  -4  -5   0  114.49   12.30
   4  -5   0  128.79    9.40
   4  -5   0  113.39   10.80
  -4   5   0  124.49   10.40
   4   5   0  149.59   10.10
   4   5   0  137.29    9.70
   4   5   0  126.19   10.90
  -4   5   0  123.69    9.40
  -4   5   0  128.69   11.10
   5  -5   0 1026.50   37.10
  -5  -5   0 1053.09   37.10
  -5  -5   0 1067.89   34.50
   5  -5   0 1067.39   36.20
   5  -5   0 1027.60   35.10
  -5  -5   0 1080.29   37.60
   5   5   0 1031.30   34.90
   5   5   0 1071.59   34.70
  -5   5   0 1044.10   35.40
   5   5   0 1081.19   36.00
  -5   5   0 1041.90   34.80
  -5   5   0 1058.79   35.40
  -6  -5   0  416.76   21.20
  -6  -5   0  417.56   22.20
  -6  -5   0  424.66   18.00
   6  -5   0  393.26   19.80
   6  -5   0  432.26   19.20
  -6   5   0  434.76   19.40
   6   5   0  433.16   18.70
   6   5   0  426.16   19.60
   6   5   0  440.86   20.10
  -6   5   0  425.76   19.50
  -6   5   0  415.06   18.80
   7  -5   0  577.74   25.10
   7  -5   0  613.64   26.30
  -7  -5   0  599.24   28.80
  -7  -5   0  588.04   23.60
  -7  -5   0  571.04   27.70
   7   5   0  597.94   25.30
  -7   5   0  621.94   25.40
  -7   5   0  606.54   25.40
   7   5   0  603.34   24.80
   7   5   0  607.34   26.80
  -7   5   0  615.94   24.80
  -8  -5   0  630.24   25.40
  -8  -5   0  633.64   31.70
  -8  -5   0  627.34   30.00
   8  -5   0  598.24   28.60
   8  -5   0  573.24   27.40
  -8   5   0  645.04   26.40
   8   5   0  629.84   26.70
   8   5   0  615.04   27.20
  -8   5   0  616.64   28.10
  -8   5   0  583.44   27.60
   8   5   0  622.14   27.30
   9  -5   0   41.10   12.50
   9  -5   0   58.29   14.30
  -9  -5   0   54.19   16.40
  -9  -5   0   43.20   16.90
   9   5   0   52.39   12.60
   9   5   0   56.49   12.30
  -9   5   0   26.20   11.30
  -9   5   0   48.20   13.70
   9   5   0   54.49   12.70
  -9   5   0   58.29   13.90
 -10  -5   0   75.09   20.50
 -10  -5   0   42.10   11.10
 -10  -5   0   70.29   19.30
  10  -5   0   71.39   17.10
  10  -5   0   75.39   15.20
 -10   5   0   74.49   12.60
  10   5   0   56.59   14.80
 -10   5   0   80.59   17.40
 -10   5   0   83.09   17.80
  10   5   0   29.90   13.80
  10   5   0   59.49   14.20
  11  -5   0   21.70   16.30
 -11  -5   0   59.09   21.40
 -11  -5   0   26.60   22.10
  11  -5   0   31.80   17.90
 -11  -5   0   20.70   12.10
 -11   5   0    5.40   13.00
  11   5   0   33.60   16.70
  11   5   0   36.50   15.60
 -11   5   0   46.80   18.90
 -11   5   0   31.40   18.50
  11   5   0   20.50   16.30
 -12  -5   0  558.24   48.00
  12  -5   0  503.55   37.70
 -12  -5   0  550.34   44.60
 -12  -5   0  556.34   33.30
  12  -5   0  523.05   34.80
 -12   5   0  542.35   40.60
 -12   5   0  518.35   30.70
 -12   5   0  561.94   41.60
  12   5   0  515.65   34.70
  12   5   0  490.15   34.50
  12   5   0  491.95   36.80
  13  -5   0  102.79   27.30
 -13  -5   0  164.98   33.20
  13  -5   0  117.09   29.10
 -13  -5   0  138.59   20.30
 -13  -5   0   67.89   35.80
  13   5   0  130.59   24.70
  13   5   0   71.79   26.30
 -13   5   0  150.38   25.50
 -13   5   0   83.09   30.00
 -13   5   0  121.39   18.90
 -13   5   0  107.99   29.40
  13   5   0  106.79   22.50
  14  -5   0   38.50   27.40
 -14  -5   0   96.99   36.60
 -14  -5   0   49.10   22.40
  14  -5   0  120.69   32.60
  14   5   0    4.00   25.20
  14   5   0  128.19   28.00
 -14   5   0   78.29   20.10
 -14   5   0  -14.20   29.70
 -14   5   0   17.40   37.80
  14   5   0   27.30   31.20
 -14   5   0   15.90   36.60
  15  -5   0  -26.90   38.70
  15  -5   0   12.60   33.70
  15   5   0   13.50   29.50
  15   5   0   31.20   32.10
   0  -6   0   14.90    5.00
   0  -6   0   27.90    6.00
   0  -6   0   19.50    3.40
   0   6   0   20.00    4.20
   0   6   0   12.90    3.60
   0   6   0   16.00    6.00
   0   6   0   25.90    4.30
   1  -6   0  724.53   21.60
  -1  -6   0  697.83   22.90
   1  -6   0  680.03   24.10
  -1  -6   0  721.73   22.50
   1  -6   0  671.53   22.70
   1  -6   0  702.23   24.90
  -1   6   0  717.33   21.50
   1   6   0  704.03   22.60
   1   6   0  707.33   22.20
  -1   6   0  673.23   22.20
  -1   6   0  677.23   25.10
   1   6   0  667.83   25.10
  -1   6   0  674.43   23.30
   1   6   0  648.94   22.40
   2  -6   0  404.06   15.60
   2  -6   0  410.06   17.60
   2  -6   0  448.46   18.20
  -2  -6   0  422.56   15.50
  -2  -6   0  405.06   16.60
  -2   6   0  404.06   14.90
   2   6   0  431.06   15.70
   2   6   0  420.76   15.50
  -2   6   0  410.26   16.50
  -2   6   0  413.66   17.90
   3  -6   0  810.22   29.80
  -3  -6   0  829.02   27.50
   3  -6   0  820.82   27.50
  -3  -6   0  802.72   28.50
   3  -6   0  846.72   29.30
   3   6   0  895.31   27.70
  -3   6   0  824.82   27.00
  -3   6   0  807.32   28.50
   3   6   0  849.02   27.80
  -3   6   0  863.01   29.40
   3   6   0  833.62   29.40
   4  -6   0  362.16   17.50
   4  -6   0  351.26   15.70
  -4  -6   0  377.86   15.60
   4  -6   0  368.26   19.10
   4   6   0  377.06   16.10
  -4   6   0  360.66   15.40
  -4   6   0  362.26   17.50
   4   6   0  402.46   16.40
  -4   6   0  364.16   16.80
   4   6   0  359.66   17.10
   5  -6   0  715.13   27.40
  -5  -6   0  743.53   25.70
   5  -6   0  707.53   26.20
   5  -6   0  687.23   29.00
  -5   6   0  699.33   26.70
   5   6   0  722.63   27.20
  -5   6   0  700.63   26.40
   5   6   0  726.93   25.90
   5   6   0  747.13   26.00
  -5   6   0  698.23   25.70
  -6  -6   0   -5.20    9.00
   6  -6   0    6.30    7.20
   6  -6   0   -7.90    8.10
  -6  -6   0   15.30    9.90
  -6  -6   0    3.00    5.30
  -6   6   0   17.20    7.50
   6   6   0   -0.30    6.80
   6   6   0   14.10    6.70
  -6   6   0   -8.60    7.90
  -6   6   0    4.30    6.50
   6   6   0    8.10    7.90
  -7  -6   0   98.89   17.90
   7  -6   0  119.79   14.50
   7  -6   0  112.69   13.90
  -7  -6   0  144.39   17.90
  -7  -6   0  123.39   12.30
  -7   6   0  121.69   12.10
   7   6   0  158.68   16.20
  -7   6   0  120.69   12.70
  -7   6   0  127.79   15.80
   7   6   0  128.59   14.70
   7   6   0  125.79   14.50
  -8  -6   0    4.20   13.60
   8  -6   0   33.80   11.50
  -8  -6   0   22.50    8.80
   8  -6   0   16.70   10.30
  -8  -6   0   -3.50   14.50
  -8   6   0   10.50   11.00
   8   6   0   10.90   14.80
  -8   6   0   10.40   11.10
   8   6   0   21.20   10.80
   8   6   0   34.00   10.90
  -8   6   0   29.40   10.00
  -9  -6   0  129.39   20.00
  -9  -6   0  132.99   16.00
   9  -6   0  149.09   17.30
  -9  -6   0  111.29   18.20
   9  -6   0  122.59   15.30
   9   6   0  124.59   15.20
  -9   6   0  109.19   13.50
  -9   6   0   96.99   15.70
   9   6   0  163.68   20.40
   9   6   0  101.79   14.30
  -9   6   0  121.09   15.90
 -10  -6   0  -12.60   10.20
  10  -6   0   32.60   14.10
  10  -6   0    0.40   17.20
 -10  -6   0    8.50   18.30
 -10  -6   0  -32.10   19.40
 -10   6   0  -21.10   16.20
 -10   6   0  -29.10   15.50
 -10   6   0    4.00   12.00
  10   6   0  -19.10   13.20
  10   6   0   16.80   13.10
  10   6   0   14.30   13.30
 -11  -6   0   32.80   22.30
  11  -6   0   38.00   19.10
  11  -6   0   -1.90   15.60
 -11  -6   0   11.90   12.90
 -11  -6   0    8.20   23.50
  11   6   0    4.00   16.80
 -11   6   0   21.70   19.30
  11   6   0   15.50   16.60
 -11   6   0  -23.60   18.40
  11   6   0   25.40   15.50
 -11   6   0   11.60   13.20
 -12  -6   0   -3.00   15.20
  12  -6   0   49.10   24.50
 -12  -6   0   71.79   27.60
 -12  -6   0    4.60   29.90
  12  -6   0   29.50   21.10
  12   6   0  -18.90   20.70
 -12   6   0  -43.70   22.50
 -12   6   0   20.70   15.40
  12   6   0    9.00   18.20
  12   6   0   10.00   18.80
 -12   6   0   20.60   25.20
 -13  -6   0   -7.40   35.40
 -13  -6   0    5.30   18.40
 -13  -6   0  -34.10   33.00
  13  -6   0   -3.90   22.80
  13  -6   0  -12.10   27.10
 -13   6   0   55.39   17.90
 -13   6   0    1.10   29.40
 -13   6   0   -7.80   24.90
 -13   6   0   -9.90   28.50
  13   6   0  -18.70   20.40
  13   6   0  -26.10   26.60
  13   6   0  -23.80   22.60
  14  -6   0  -43.90   31.70
 -14  -6   0   18.40   22.80
  14  -6   0  -34.20   27.80
 -14   6   0  -69.29   36.50
 -14   6   0   11.00   21.20
  14   6   0   29.30   26.50
 -14   6   0   26.60   32.90
  14   6   0    9.30   27.10
 -14   6   0  -52.19   36.60
   0  -7   0   14.70    5.80
   0  -7   0    4.70    3.30
   0  -7   0    4.40    5.30
   0   7   0    1.80    4.00
   0   7   0    0.80    3.70
   0   7   0    7.10    6.60
   1  -7   0  172.08   10.00
  -1  -7   0  196.18    9.60
   1  -7   0  197.68    8.60
   1  -7   0  196.48   12.60
  -1  -7   0  188.38   10.40
   1  -7   0  202.48   12.70
  -1  -7   0  207.68   11.30
   1   7   0  189.28   13.60
  -1   7   0  201.18   13.60
  -1   7   0  207.38    8.90
  -1   7   0  189.08   10.60
   1   7   0  193.58   10.40
  -1   7   0  193.08    9.50
   1   7   0  195.48    9.50
   1   7   0  189.28   10.10
  -2  -7   0 1020.60   37.20
   2  -7   0 1146.69   37.40
  -2  -7   0 1111.49   35.00
   2  -7   0 1103.69   37.40
   2  -7   0 1107.79   35.30
   2   7   0 1106.29   38.00
   2   7   0 1138.79   35.20
  -2   7   0 1160.08   37.90
  -2   7   0 1086.09   35.90
  -2   7   0 1102.39   34.30
   2   7   0 1111.79   34.80
  -3  -7   0   94.89   12.20
   3  -7   0   93.09   11.80
  -3  -7   0  116.39    9.10
   3  -7   0  126.39    9.20
   3  -7   0  131.89   13.40
  -3   7   0  119.49   10.40
   3   7   0  104.89   10.00
   3   7   0  117.29   11.20
  -3   7   0  114.79   12.80
  -3   7   0  118.69    8.80
   3   7   0  120.29    9.90
   4  -7   0 1066.69   35.80
  -4  -7   0 1061.69   37.00
   4  -7   0 1081.59   37.50
   4  -7   0 1072.79   38.60
  -4  -7   0 1099.39   35.70
  -4   7   0 1065.09   37.20
   4   7   0 1139.79   35.70
   4   7   0 1102.79   35.80
  -4   7   0 1078.99   36.60
   4   7   0 1075.19   37.60
  -4   7   0 1102.19   35.00
   5  -7   0   41.90    8.50
   5  -7   0   39.00   10.70
  -5  -7   0   39.40    6.70
  -5  -7   0   29.70    8.80
   5  -7   0   57.69    8.00
   5   7   0   69.69    8.80
  -5   7   0   62.29    8.30
   5   7   0   37.90    8.80
  -5   7   0   53.49    9.10
   5   7   0   49.30    7.60
  -5   7   0   52.09    7.60
   6  -7   0  125.09   15.70
  -6  -7   0  152.28   12.10
   6  -7   0  142.59   13.50
   6   7   0  156.48   13.70
   6   7   0  174.48   14.60
  -6   7   0  158.28   13.40
  -6   7   0  162.18   15.80
   6   7   0  132.49   18.20
  -6   7   0  149.49   13.30
  -7  -7   0   81.99    9.90
   7  -7   0   61.59   10.80
   7  -7   0   65.99   12.40
  -7  -7   0   49.99   13.20
   7   7   0   71.69   11.20
  -7   7   0   59.99   12.20
  -7   7   0   82.39   11.20
  -7   7   0   58.09   10.90
   7   7   0   55.39   11.30
   7   7   0   76.29   10.70
  -8  -7   0   83.09   19.20
   8  -7   0   75.29   12.60
   8  -7   0   63.09   13.90
  -8  -7   0   74.79   10.80
  -8  -7   0   64.99   15.60
   8   7   0   62.69   13.40
  -8   7   0   97.49   24.40
   8   7   0   81.89   12.40
  -8   7   0   64.09   11.30
  -8   7   0   72.89   13.20
   8   7   0   79.19   12.30
  -9  -7   0  213.98   27.70
  -9  -7   0  193.18   18.20
   9  -7   0  201.38   21.30
   9  -7   0  213.88   21.80
  -9  -7   0  270.57   31.00
   9   7   0  218.98   22.50
  -9   7   0  247.18   20.30
   9   7   0  222.68   20.20
  -9   7   0  220.48   23.30
  -9   7   0  202.78   23.30
  10  -7   0   13.60   17.80
 -10  -7   0   27.10   11.50
  10  -7   0   31.50   13.80
 -10  -7   0   55.89   20.70
 -10  -7   0   64.99   22.30
  10   7   0   17.70   14.10
  10   7   0   61.59   15.50
 -10   7   0   38.60   16.20
 -10   7   0   34.10   11.90
 -10   7   0   14.30   17.10
  10   7   0   35.60   15.40
  11  -7   0  150.58   23.40
 -11  -7   0   82.79   28.10
 -11  -7   0  151.68   26.90
  11  -7   0  152.18   20.50
 -11   7   0  167.28   17.70
 -11   7   0  107.79   21.40
  11   7   0  121.29   18.60
  11   7   0  133.59   19.80
  11   7   0   90.09   19.80
 -11   7   0  155.98   23.20
 -12  -7   0  134.29   35.10
  12  -7   0  115.09   22.60
 -12  -7   0   68.39   18.20
  12  -7   0  149.69   26.20
 -12  -7   0  126.59   29.90
  12   7   0  133.89   23.60
  12   7   0   84.39   24.50
  12   7   0  134.49   21.30
 -12   7   0   88.69   22.90
 -12   7   0  115.49   26.40
 -12   7   0  109.09   25.20
  13  -7   0   24.10   28.80
 -13  -7   0   76.59   35.70
 -13  -7   0   36.90   21.00
  13  -7   0   43.00   25.50
  13   7   0   25.40   27.40
  13   7   0   50.79   25.10
 -13   7   0   34.80   30.90
 -13   7   0   19.40   27.30
  13   7   0   38.70   22.70
 -13   7   0   79.29   19.90
 -13   7   0   -2.40   30.40
  14  -7   0   24.30   31.90
  14  -7   0   85.19   36.10
 -14  -7   0   44.10   24.10
  14   7   0   35.00   26.20
 -14   7   0   30.40   37.10
 -14   7   0   -1.10   31.30
  14   7   0    6.50   28.20
 -14   7   0   17.00   22.50
   0  -8   0  194.88   14.00
   0  -8   0  224.08   10.30
   0  -8   0  208.68   13.50
   0   8   0  216.18   11.30
   0   8   0  231.58   10.60
   0   8   0  221.58   15.30
  -1  -8   0 1708.43   50.09
   1  -8   0 1656.93   53.19
  -1  -8   0 1577.84   50.09
   1  -8   0 1727.03   49.20
   1  -8   0 1637.64   52.19
  -1  -8   0 1643.64   50.69
   1   8   0 1687.43   49.80
  -1   8   0 1557.34   50.69
   1   8   0 1558.44   49.80
  -1   8   0 1593.04   49.50
   1   8   0 1702.43   50.09
  -1   8   0 1749.72   49.10
   1   8   0 1613.74   53.49
  -1   8   0 1630.04   53.39
  -2  -8   0  176.18   10.50
  -2  -8   0  159.68   11.20
   2  -8   0  170.98   14.00
  -2  -8   0  164.58   11.60
   2  -8   0  152.28   10.70
   2  -8   0  163.48   13.70
   2   8   0  180.28   14.90
   2   8   0  174.58   11.00
  -2   8   0  172.68   14.50
   2   8   0  172.88   10.90
  -2   8   0  162.68   11.40
  -2   8   0  175.78    9.70
   3  -8   0  147.59   15.00
  -3  -8   0  127.59   10.20
   3  -8   0  144.99   10.70
   3  -8   0  145.49   13.30
  -3  -8   0  127.99   11.90
  -3   8   0  141.59   11.40
   3   8   0  147.39   10.90
  -3   8   0  140.09    9.70
  -3   8   0  133.09   14.10
   3   8   0  126.09   12.40
   3   8   0  150.08   10.90
  -4  -8   0  355.66   16.40
   4  -8   0  371.66   16.70
   4  -8   0  361.36   20.50
   4  -8   0  352.46   19.00
  -4  -8   0  357.46   19.60
  -4   8   0  370.86   17.60
   4   8   0  387.96   19.00
   4   8   0  351.06   16.70
  -4   8   0  392.36   16.20
   4   8   0  366.06   16.80
  -4   8   0  368.06   19.40
  -5  -8   0   32.60    6.70
   5  -8   0   22.60    6.90
  -5  -8   0   27.90   10.20
   5  -8   0   12.70   11.70
   5  -8   0   26.40    8.90
   5   8   0   35.80    8.20
   5   8   0   31.80    8.10
   5   8   0   31.60    7.60
  -5   8   0   29.20    7.40
  -5   8   0   23.70    8.90
  -5   8   0   31.60    7.60
   6  -8   0  163.78   14.20
  -6  -8   0  148.09   12.80
   6  -8   0  131.49   16.40
  -6   8   0  174.88   14.90
   6   8   0  134.49   15.40
   6   8   0  140.29   14.20
  -6   8   0  149.79   16.60
   6   8   0  142.89   14.60
  -6   8   0  129.29   13.70
   7  -8   0   -6.40   11.90
  -7  -8   0    0.60    7.00
   7  -8   0    0.90    8.90
  -7   8   0    2.50   10.90
   7   8   0    1.20    9.40
   7   8   0    3.90    9.10
  -7   8   0    8.50   10.20
   7   8   0   -1.50    9.90
  -7   8   0   -4.30    8.50
   8  -8   0  365.76   24.00
   8  -8   0  445.16   27.00
  -8  -8   0  384.26   28.10
  -8  -8   0  373.76   21.30
  -8   8   0  384.16   22.90
   8   8   0  390.46   24.00
  -8   8   0  398.46   23.80
   8   8   0  407.96   23.90
   8   8   0  371.66   24.40
  -8   8   0  384.26   25.20
   9  -8   0   70.69   17.70
  -9  -8   0   49.90   11.20
   9  -8   0   72.29   15.20
  -9  -8   0   57.09   18.90
  -9   8   0   59.69   15.70
  -9   8   0   47.10   11.90
   9   8   0   41.60   15.00
   9   8   0   40.20   13.70
   9   8   0   57.49   13.90
  -9   8   0   47.50   15.80
  10  -8   0   88.59   19.60
 -10  -8   0   76.29   22.50
 -10  -8   0   80.29   13.80
  10  -8   0   59.39   16.00
 -10   8   0   99.09   18.20
 -10   8   0   86.69   19.30
  10   8   0   56.39   17.40
  10   8   0   51.99   16.20
  10   8   0   64.19   16.60
 -10   8   0   75.99   14.60
  11  -8   0   55.49   22.20
 -11  -8   0   59.59   26.00
 -11  -8   0   15.30   14.90
 -11   8   0   66.39   21.20
  11   8   0   51.79   20.00
  11   8   0   37.50   17.50
  11   8   0   15.90   18.10
 -11   8   0   45.50   26.20
 -11   8   0   44.40   22.30
 -12  -8   0   29.20   17.90
  12  -8   0   36.40   21.10
 -12  -8   0   66.99   30.10
  12   8   0   45.90   21.80
  12   8   0   38.80   24.20
 -12   8   0   78.99   26.90
 -12   8   0   40.30   25.70
 -12   8   0   67.59   18.40
  12   8   0   52.19   19.70
 -13  -8   0   -4.80   19.90
  13  -8   0   -2.20   30.30
 -13  -8   0   81.59   37.20
  13  -8   0   40.40   26.00
 -13   8   0  -32.80   32.10
  13   8   0   19.50   25.20
 -13   8   0    5.40   21.10
  13   8   0   -4.10   22.80
 -13   8   0  -10.60   31.70
  14  -8   0   81.39   38.40
 -14  -8   0  -46.50   24.30
  14  -8   0   49.99   32.10
  14   8   0  -15.50   26.30
 -14   8   0    0.10   43.70
  14   8   0   15.80   29.80
 -14   8   0   41.10   23.60
   0  -9   0   54.19    8.50
   0  -9   0   49.20    5.60
   0  -9   0   42.90    8.80
   0   9   0   49.10    6.50
   0   9   0   59.79   10.10
   0   9   0   63.49    6.50
   1  -9   0   50.79    9.00
  -1  -9   0   60.19    6.50
   1  -9   0   56.89    5.70
   1  -9   0   45.40    9.00
  -1  -9   0   56.69    8.10
   1   9   0   69.59    7.70
   1   9   0   60.29   10.80
  -1   9   0   59.69    5.90
   1   9   0   63.79    7.80
   1   9   0   74.39    7.20
  -1   9   0   55.49    7.50
  -1   9   0   44.00    9.50
  -1   9   0   57.69    6.30
   2  -9   0  115.59   14.20
  -2  -9   0  106.29    9.20
  -2  -9   0  110.69   10.50
  -2  -9   0  104.79   10.70
   2  -9   0  106.99   12.90
   2  -9   0   94.39   10.10
  -2   9   0  104.59   11.60
  -2   9   0   98.39   10.60
   2   9   0  108.49   10.10
   2   9   0   96.69    8.00
   2   9   0  102.29   11.90
  -2   9   0   92.89    8.80
   2   9   0  103.79   10.10
  -3  -9   0  312.07   15.40
  -3  -9   0  370.36   17.40
   3  -9   0  349.96   19.00
   3  -9   0  330.07   15.90
   3  -9   0  351.06   20.00
   3   9   0  332.17   18.40
   3   9   0  347.77   20.40
   3   9   0  338.27   15.80
   3   9   0  332.17   15.90
  -3   9   0  365.56   20.20
  -3   9   0  321.97   16.50
  -3   9   0  336.27   14.60
   4  -9   0    7.00    6.60
  -4  -9   0   12.80    5.50
   4  -9   0    7.10    8.50
  -4  -9   0    1.20    7.70
   4  -9   0    3.00   10.30
   4   9   0    7.50    7.10
   4   9   0   15.40    6.70
  -4   9   0   -0.90    9.00
   4   9   0   14.40    7.20
  -4   9   0    4.70    6.40
  -4   9   0    3.90    5.90
  -5  -9   0   21.00   12.00
   5  -9   0   44.10   10.50
   5  -9   0   61.49   12.70
  -5  -9   0   25.50    7.10
   5  -9   0   44.60    8.50
   5   9   0   47.20    8.70
   5   9   0   33.00    8.50
  -5   9   0   32.40    9.20
   5   9   0   36.60    8.70
  -5   9   0   48.20    8.80
  -5   9   0   48.00   10.90
   6  -9   0  102.29   13.10
  -6  -9   0   87.89   10.40
   6  -9   0  113.19   13.90
  -6  -9   0  109.29   15.20
  -6   9   0  135.69   14.60
  -6   9   0  123.59   14.80
   6   9   0   92.39   11.50
  -6   9   0  108.89   13.80
   6   9   0  127.99   15.50
   6   9   0  110.19   11.80
  -7  -9   0   19.80    8.60
   7  -9   0   28.30   13.90
   7  -9   0   21.20   10.40
  -7  -9   0   16.90   13.10
   7   9   0   27.20   10.90
  -7   9   0   27.90   11.10
  -7   9   0   38.50   11.10
   7   9   0   31.30   11.10
   7   9   0   31.40   10.70
  -7   9   0   14.10   15.50
   8  -9   0  124.59   18.00
   8  -9   0  103.19   14.30
  -8  -9   0  115.89   12.50
  -8   9   0  139.99   15.70
   8   9   0  139.89   15.70
  -8   9   0  118.89   16.50
   8   9   0  117.49   14.60
  -8   9   0  119.19   14.10
   8   9   0   79.89   14.40
   9  -9   0  186.78   22.70
  -9  -9   0  202.18   24.20
  -9  -9   0  207.28   20.00
   9  -9   0  317.17   29.50
   9   9   0  214.38   23.00
  -9   9   0  240.78   25.00
  -9   9   0  228.78   21.60
  -9   9   0  209.68   26.90
   9   9   0  191.58   23.50
   9   9   0  227.48   24.00
 -10  -9   0  249.18   24.00
  10  -9   0  264.27   26.00
  10  -9   0  255.27   27.90
 -10  -9   0  275.87   35.60
  10   9   0  244.18   27.70
  10   9   0  236.38   28.80
 -10   9   0  284.37   24.50
 -10   9   0  254.47   29.20
  10   9   0  223.38   28.30
 -10   9   0  277.97   30.30
 -11  -9   0  196.38   29.90
 -11  -9   0  166.48   19.50
  11  -9   0  183.68   26.40
  11  -9   0  127.19   22.40
  11   9   0  125.69   21.20
 -11   9   0  211.38   26.20
 -11   9   0  201.48   25.60
 -11   9   0  199.18   25.10
  11   9   0  161.58   20.50
  11   9   0  146.09   23.70
 -12  -9   0  178.08   34.90
  12  -9   0   93.59   29.90
 -12  -9   0  139.39   21.20
  12  -9   0  123.79   25.50
 -12   9   0  101.69   20.40
  12   9   0   96.29   24.40
  12   9   0  107.09   26.80
 -12   9   0   98.89   28.60
 -12   9   0   56.29   28.20
  12   9   0  127.49   22.00
  13  -9   0    0.60   32.20
 -13  -9   0   50.09   21.10
  13  -9   0   -2.40   27.50
 -13   9   0   33.30   34.90
  13   9   0   57.29   24.40
  13   9   0   40.40   26.50
 -13   9   0    2.50   21.40
  14  -9   0   -4.60   33.80
  14  -9   0  -39.80   39.00
 -14  -9   0  -23.20   25.00
 -14   9   0   28.80   24.90
  14   9   0  -15.40   30.60
   0 -10   0  405.66   16.00
   0 -10   0  373.86   19.20
   0 -10   0  390.86   20.50
   0  10   0  405.06   22.00
   0  10   0  370.56   16.80
   0  10   0  397.66   16.10
   1 -10   0  443.66   21.70
  -1 -10   0  466.25   20.60
  -1 -10   0  487.55   18.40
   1 -10   0  484.05   17.50
   1 -10   0  485.35   22.80
  -1  10   0  458.85   19.30
  -1  10   0  446.16   17.90
  -1  10   0  455.75   23.60
   1  10   0  466.35   18.00
  -1  10   0  462.25   17.40
   1  10   0  483.35   24.10
   1  10   0  456.65   18.60
  -1  10   0  450.15   20.10
  -2 -10   0  494.25   20.50
   2 -10   0  463.15   20.10
   2 -10   0  505.55   23.60
  -2 -10   0  503.75   19.70
   2 -10   0  477.75   23.60
  -2  10   0  492.25   18.70
  -2  10   0  467.65   24.30
  -2  10   0  470.85   20.90
   2  10   0  531.75   18.40
   2  10   0  527.15   25.60
   2  10   0  509.85   20.10
   2  10   0  508.15   19.60
   3 -10   0   20.20    7.00
  -3 -10   0   18.80    6.00
   3 -10   0   23.80   10.40
  -3 -10   0   23.80    8.50
   3 -10   0   29.40    9.60
   3  10   0   20.10   11.00
  -3  10   0   31.90    7.30
   3  10   0   29.10    7.40
   3  10   0   10.60    8.30
  -3  10   0   26.90   10.40
  -3  10   0   29.90    6.30
   3  10   0   10.80    7.40
   4 -10   0   34.40   12.40
  -4 -10   0   19.50    6.80
   4 -10   0   18.10    7.50
  -4 -10   0   35.30    9.60
   4 -10   0   25.00   10.20
   4  10   0   45.80    8.50
  -4  10   0   34.20    7.60
  -4  10   0   24.00    8.20
  -4  10   0    9.80   10.30
   4  10   0   19.00   11.80
   4  10   0   18.30    8.80
   5 -10   0  310.77   18.00
  -5 -10   0  281.07   20.30
   5 -10   0  286.77   20.90
  -5 -10   0  305.67   17.20
   5  10   0  314.37   18.60
  -5  10   0  306.57   18.70
   5  10   0  328.97   17.90
  -5  10   0  305.27   17.00
  -5  10   0  319.77   22.10
   5  10   0  319.67   20.30
  -6 -10   0   -9.40   14.20
   6 -10   0   13.80   11.50
   6 -10   0   -7.10    9.30
  -6 -10   0    0.30    7.50
  -6  10   0   28.70    9.80
   6  10   0    0.90    9.50
   6  10   0  -16.30    8.20
  -6  10   0   -4.10    8.90
   6  10   0  -16.10    9.60
   7 -10   0  138.09   17.20
   7 -10   0  139.69   17.60
  -7 -10   0  138.29   15.80
  -7 -10   0  111.49   19.00
  -7  10   0  143.59   18.40
  -7  10   0  123.39   16.30
   7  10   0  119.19   15.00
   7  10   0  132.79   14.60
   7  10   0  136.39   14.80
  -7  10   0  108.69   13.40
  -8 -10   0   37.00   11.00
   8 -10   0   44.30   13.70
  -8 -10   0   39.50   18.10
   8 -10   0   56.69   17.70
   8  10   0   45.30   13.60
   8  10   0   33.10   13.50
  -8  10   0   55.49   12.80
  -8  10   0   52.69   16.80
   8  10   0   26.60   12.80
  -8  10   0   27.50   13.20
  -9 -10   0  143.59   23.00
   9 -10   0  188.98   22.80
   9 -10   0  134.39   18.40
   9  10   0  163.28   19.00
  -9  10   0  160.28   18.70
   9  10   0  141.19   18.20
  -9  10   0  162.98   20.60
   9  10   0  143.09   17.80
  -9  10   0  173.28   17.50
 -10 -10   0    5.60   13.10
  10 -10   0   -1.30   17.50
 -10 -10   0   32.90   25.30
  10 -10   0   34.40   21.90
  10  10   0   20.30   16.50
 -10  10   0   -5.60   18.50
 -10  10   0  -19.80   19.20
  10  10   0  -25.50   17.20
 -10  10   0   13.00   14.10
  10  10   0    3.30   17.70
 -11 -10   0   -9.20   16.10
  11 -10   0   24.50   20.70
 -11 -10   0  -10.20   28.40
  11 -10   0   25.30   24.80
 -11  10   0   -1.40   23.30
 -11  10   0   35.50   16.80
  11  10   0  -13.90   21.80
 -11  10   0   49.20   23.50
  11  10   0    9.80   22.20
  11  10   0   32.30   19.50
  12 -10   0   11.10   26.00
 -12 -10   0    3.70   34.50
 -12 -10   0    3.80   18.50
  12 -10   0  -49.60   29.20
 -12  10   0   -4.90   19.40
 -12  10   0    2.30   28.50
  12  10   0   -9.30   22.00
  12  10   0  -19.00   21.50
 -12  10   0   13.10   27.10
 -13 -10   0   47.60   22.60
  13 -10   0   55.19   37.20
  13 -10   0   33.30   30.90
 -13  10   0   19.80   35.80
 -13  10   0   38.30   23.00
  13  10   0   32.80   28.60
  13  10   0   71.29   24.10
   0 -11   0  107.19   11.40
   0 -11   0  101.89    9.20
   0 -11   0   89.69   11.50
   0  11   0   97.89    9.80
   0  11   0   88.19   13.80
   0  11   0   90.39   10.20
   1 -11   0   16.60    9.50
  -1 -11   0   27.10    6.30
  -1 -11   0   24.40    8.70
   1 -11   0   25.60    5.40
   1 -11   0   21.80    9.60
   1  11   0   31.00    6.70
   1  11   0   28.60    6.00
   1  11   0   25.50   10.80
  -1  11   0   27.00   11.30
  -1  11   0   19.70    5.50
  -1  11   0   19.50    6.60
   2 -11   0   49.60   11.30
  -2 -11   0   60.39    8.10
   2 -11   0   56.79   11.10
  -2 -11   0   48.30    8.80
   2  11   0   51.09    8.00
  -2  11   0   48.60    9.70
  -2  11   0   46.70    6.00
   2  11   0   75.19    8.50
  -2  11   0   55.99    9.10
  -2  11   0   70.69   12.80
  -3 -11   0   46.40    9.70
  -3 -11   0   34.40    7.30
   3 -11   0   41.10   14.40
   3 -11   0   37.30    8.50
   3 -11   0   36.70   10.40
  -3  11   0   35.30    8.70
   3  11   0   53.79    8.60
   3  11   0   31.20   12.40
  -3  11   0   16.20   11.80
   3  11   0   43.70    8.80
  -3  11   0   52.49    7.50
  -4 -11   0    4.10    9.50
   4 -11   0    2.50   10.40
   4 -11   0   17.40    8.20
  -4 -11   0    9.00    6.90
  -4  11   0   21.60    7.90
   4  11   0   17.60    8.50
   4  11   0   13.30   12.60
   4  11   0   16.90    8.50
  -4  11   0   16.30    7.80
   4  11   0   16.30    9.70
  -4  11   0   12.50   11.70
  -5 -11   0   58.99    9.60
  -5 -11   0   58.99   12.60
   5 -11   0   58.09   10.50
   5 -11   0   66.89   13.90
  -5  11   0   56.99   17.30
   5  11   0   65.69   10.90
   5  11   0   51.99   10.70
  -5  11   0   68.29   11.10
   5  11   0   47.30   16.00
   5  11   0   52.49   12.30
  -5  11   0   64.09   10.40
  -6 -11   0  186.48   22.00
   6 -11   0  189.68   17.50
  -6 -11   0  169.58   16.10
   6 -11   0  184.58   22.50
   6  11   0  157.28   17.80
   6  11   0  200.58   19.40
   6  11   0  154.78   18.40
  -6  11   0  190.78   17.90
  -6  11   0  183.48   17.40
  -6  11   0  180.18   23.00
   7 -11   0  260.07   25.60
  -7 -11   0  325.07   38.90
   7 -11   0  251.37   21.20
  -7 -11   0  221.08   18.80
   7  11   0  268.97   22.60
  -7  11   0  277.87   21.70
   7  11   0  294.07   22.80
  -7  11   0  273.17   25.60
  -7  11   0  263.87   21.30
   7  11   0  212.68   20.70
   8 -11   0   96.09   18.90
  -8 -11   0   61.29   21.50
  -8 -11   0   62.89   12.10
   8 -11   0   70.19   15.10
   8  11   0   60.39   14.90
   8  11   0   92.39   15.40
  -8  11   0   78.89   14.20
   8  11   0   59.29   14.80
  -8  11   0   64.59   14.80
  -8  11   0   71.39   18.40
   9 -11   0   64.49   19.20
  -9 -11   0   65.39   24.20
   9 -11   0   73.49   19.80
  -9 -11   0   81.69   14.30
   9  11   0   42.70   16.30
  -9  11   0   47.80   14.30
  -9  11   0   54.39   16.90
   9  11   0   44.50   15.70
   9  11   0   67.59   16.10
  -9  11   0   48.70   18.40
  10 -11   0  406.76   37.30
 -10 -11   0  301.77   27.50
  10 -11   0  298.37   32.30
  10  11   0  359.56   30.50
 -10  11   0  421.36   37.60
 -10  11   0  385.96   29.10
  10  11   0  320.97   34.40
 -10  11   0  360.86   34.70
  10  11   0  322.37   31.30
  11 -11   0  131.99   24.50
 -11 -11   0  128.69   20.10
 -11 -11   0  164.28   45.40
  11 -11   0  103.99   50.29
  11  11   0  112.69   22.50
 -11  11   0  126.09   20.30
 -11  11   0   97.49   26.90
  11  11   0  116.39   24.60
 -11  11   0  152.58   26.50
  12 -11   0  157.18   36.10
  12 -11   0   80.19   27.70
 -12 -11   0  143.19   38.60
 -12 -11   0  146.59   23.20
  12  11   0  145.69   27.00
 -12  11   0   90.29   32.80
  12  11   0   93.69   29.90
 -12  11   0  155.18   23.40
  13 -11   0   47.50   31.50
 -13 -11   0   54.99   23.70
  13 -11   0    6.60   40.50
 -13  11   0   -7.00   37.90
  13  11   0   59.09   29.00
 -13  11   0   94.39   23.90
   0 -12   0   19.00    6.00
   0  12   0   21.00    6.40
   0  12   0   -4.00   13.50
   0  12   0   11.70    6.20
   1 -12   0  523.05   27.20
   1 -12   0  597.74   21.30
   1 -12   0  543.35   27.00
  -1 -12   0  598.14   22.30
  -1  12   0  585.04   21.10
   1  12   0  514.25   29.50
   1  12   0  574.14   21.70
  -1  12   0  530.35   23.20
   1  12   0  550.34   22.30
   2 -12   0  246.78   25.70
  -2 -12   0  298.97   15.80
   2 -12   0  256.87   20.40
  -2  12   0  276.27   17.10
   2  12   0  285.77   13.90
   2  12   0  283.27   16.80
   2  12   0  297.47   24.40
  -3 -12   0  519.95   23.50
  -3 -12   0  489.25   22.10
   3 -12   0  496.05   26.30
   3 -12   0  470.95   22.50
   3  12   0  500.75   29.50
   3  12   0  499.55   22.80
  -3  12   0  439.46   30.30
   3  12   0  509.45   21.20
  -3  12   0  518.55   23.60
  -3  12   0  508.05   20.50
  -4 -12   0  596.34   26.80
   4 -12   0  562.54   29.30
   4 -12   0  582.24   25.50
  -4 -12   0  549.45   24.50
  -4  12   0  560.44   22.90
  -4  12   0  557.64   30.40
  -4  12   0  521.95   25.40
   4  12   0  584.04   28.60
   4  12   0  552.34   32.00
   4  12   0  569.64   23.60
   4  12   0  602.44   25.70
   5 -12   0  201.68   18.10
   5 -12   0  220.08   22.30
  -5 -12   0  230.88   20.10
  -5 -12   0  227.98   17.10
   5  12   0  233.28   17.60
  -5  12   0  227.68   17.10
  -5  12   0  256.47   24.90
   5  12   0  270.57   27.60
   5  12   0  247.58   20.50
  -5  12   0  238.28   18.80
   5  12   0  246.68   19.90
  -6 -12   0   66.29   11.50
   6 -12   0   74.79   13.00
  -6 -12   0  108.89   16.30
   6 -12   0  105.29   16.80
  -6  12   0   95.89   17.40
  -6  12   0   77.09   12.70
  -6  12   0   82.39   13.10
   6  12   0   97.69   15.10
   6  12   0  104.69   13.00
   6  12   0  110.09   13.80
   6  12   0  101.59   19.50
   7 -12   0   11.70   16.90
  -7 -12   0   11.80   16.50
  -7 -12   0    4.70    9.70
   7 -12   0    6.60   12.30
  -7  12   0   10.80   11.60
  -7  12   0   18.50   16.30
   7  12   0   36.30   12.50
   7  12   0   11.00   12.70
   7  12   0   30.30   13.70
  -7  12   0   29.80   12.80
  -8 -12   0   16.40   19.60
   8 -12   0   19.80   18.10
  -8 -12   0   35.70   12.70
   8 -12   0   27.20   27.80
  -8  12   0   39.60   24.00
   8  12   0   12.10   14.80
   8  12   0   14.40   14.70
  -8  12   0   36.60   19.00
  -8  12   0   26.90   15.10
  -9 -12   0   41.90   26.20
  -9 -12   0   16.30   13.80
   9 -12   0   57.89   17.40
   9 -12   0   54.69   21.00
   9  12   0   44.90   17.90
  -9  12   0   29.50   15.30
   9  12   0   35.70   16.80
  -9  12   0   62.69   20.80
  -9  12   0   22.50   17.50
   9  12   0    7.40   16.00
  10 -12   0   31.70   21.30
 -10 -12   0    7.60   16.30
  10 -12   0   73.09   25.00
 -10 -12   0   42.40   30.70
  10  12   0    1.40   19.40
 -10  12   0   16.00   22.40
  10  12   0   19.90   19.40
  10  12   0   -6.90   19.70
 -10  12   0   -0.40   23.20
 -10  12   0   22.20   16.30
 -11 -12   0   -6.30   34.20
  11 -12   0    3.30   23.00
 -11 -12   0   -5.00   17.30
  11 -12   0  -25.10   29.40
  11  12   0  -20.30   23.00
 -11  12   0   -8.10   17.90
 -11  12   0   42.60   28.40
  11  12   0   -3.00   21.00
  12 -12   0   35.40   34.00
  12 -12   0   76.19   28.60
 -12 -12   0   57.59   22.40
  12  12   0   -8.00   24.10
 -12  12   0   51.29   22.40
 -12  12   0    2.90   34.20
  12  12   0   -3.30   28.10
  13 -12   0  -31.60   32.30
  13 -12   0   38.70   40.20
 -13 -12   0   65.09   24.70
 -13  12   0   61.39   25.30
   0 -13   0   11.10    6.40
   0  13   0    9.40   14.30
   0  13   0    2.00    6.80
   0  13   0   14.50    7.10
   1 -13   0  131.29   11.40
  -1 -13   0  124.69   12.40
   1 -13   0  139.89   15.90
   1  13   0  127.99   12.10
   1  13   0  131.09   18.40
  -1  13   0  129.39   11.80
  -1  13   0  133.49   13.60
   1  13   0  119.29   13.30
  -1  13   0  153.28   19.40
   2 -13   0   51.89   13.30
  -2 -13   0   45.40    8.30
  -2  13   0   49.80    9.40
  -2  13   0   39.50    7.10
   2  13   0   35.00    9.10
  -2  13   0   62.79   15.90
   2  13   0   43.30    7.70
   2  13   0   55.69   15.60
  -3 -13   0  106.89   12.60
  -3 -13   0  110.59   13.40
   3 -13   0  101.99   12.10
   3 -13   0   90.29   14.70
  -3  13   0  109.79   17.60
   3  13   0  117.09   18.60
   3  13   0  126.29   15.80
  -3  13   0  138.89   13.70
   3  13   0  127.89   13.80
  -3  13   0  131.79   13.10
   4 -13   0  326.97   24.60
  -4 -13   0  335.07   21.60
   4 -13   0  300.47   19.90
  -4 -13   0  284.07   18.60
   4  13   0  277.17   28.50
   4  13   0  331.37   18.60
  -4  13   0  315.97   27.10
   4  13   0  323.77   21.10
   4  13   0  320.87   23.40
  -4  13   0  293.37   19.90
  -4  13   0  321.77   18.00
  -5 -13   0   -4.20   12.50
   5 -13   0   14.50   11.10
  -5 -13   0   -4.00    8.20
   5 -13   0    5.70   14.10
  -5  13   0   17.20   10.40
   5  13   0    0.20   12.20
   5  13   0    8.30   10.70
  -5  13   0    5.50    9.80
  -5  13   0   -6.90   15.40
   5  13   0   17.70   10.10
   5  13   0    7.40   18.20
  -6 -13   0  466.85   25.00
   6 -13   0  459.55   31.10
  -6 -13   0  490.85   29.20
   6 -13   0  482.45   26.90
  -6  13   0  494.55   27.00
   6  13   0  466.45   27.20
   6  13   0  471.35   28.60
  -6  13   0  504.15   25.10
   6  13   0  437.06   24.60
  -6  13   0  522.35   32.50
   6  13   0  522.55   37.00
   7 -13   0  472.95   32.20
  -7 -13   0  391.96   29.40
   7  13   0  368.16   25.70
   7  13   0  535.25   47.20
  -7  13   0  479.25   33.00
   7  13   0  411.36   28.00
   7  13   0  407.16   38.10
  -7  13   0  375.16   26.00
  -8 -13   0   39.20   19.10
   8 -13   0   40.10   20.00
   8 -13   0   27.50   16.40
  -8 -13   0   14.80   12.30
  -8  13   0   34.20   20.00
   8  13   0   32.00   15.90
   8  13   0   23.30   15.60
  -8  13   0   35.40   16.20
  -8  13   0   40.90   13.80
   8  13   0   -1.70   15.70
   9 -13   0   43.60   18.90
   9 -13   0   49.90   23.80
  -9 -13   0   13.50   23.50
  -9 -13   0   -4.90   13.50
  -9  13   0   65.79   16.40
   9  13   0   50.39   18.00
   9  13   0   46.00   18.80
  -9  13   0   66.09   23.20
   9  13   0   26.40   17.30
  -9  13   0   40.30   19.20
 -10 -13   0   17.50   16.00
 -10 -13   0   18.70   45.00
  10 -13   0   39.20   22.90
  10 -13   0   31.90   29.40
 -10  13   0    3.80   25.30
  10  13   0    7.70   19.00
  10  13   0    5.80   19.70
 -10  13   0    3.60   16.70
 -11 -13   0  119.29   40.40
 -11 -13   0  124.99   21.30
  11 -13   0  162.48   28.70
  11 -13   0  183.78   33.20
 -11  13   0  160.08   22.90
  11  13   0  144.29   25.40
  11  13   0  130.59   26.30
 -11  13   0  207.08   33.60
  12 -13   0   61.29   37.50
  12 -13   0   61.49   29.80
 -12 -13   0   83.09   24.00
 -12  13   0  -30.90   35.90
 -12  13   0   62.39   23.00
  12  13   0   89.59   28.60
   0 -14   0   45.60    8.30
   0  14   0   32.30    8.50
   0  14   0   34.80   16.50
   0  14   0   44.30    8.70
  -1 -14   0  126.89   13.30
   1 -14   0  126.59   12.20
   1 -14   0  134.59   17.00
   1  14   0  117.29   13.10
  -1  14   0  142.99   15.00
  -1  14   0  113.49   13.20
  -1  14   0  151.18   20.60
   1  14   0  126.39   14.20
   1  14   0  148.99   20.60
  -2 -14   0  295.17   17.60
   2 -14   0  249.18   23.90
  -2  14   0  281.97   18.40
   2  14   0  280.47   29.10
   2  14   0  248.98   15.60
  -2  14   0  291.67   27.80
  -2  14   0  265.27   15.50
  -2  14   0  281.77   16.20
   2  14   0  256.67   18.80
   3 -14   0  360.26   26.90
  -3 -14   0  392.06   20.40
  -3  14   0  323.87   29.80
   3  14   0  341.67   21.30
   3  14   0  370.16   17.00
   3  14   0  340.47   19.10
  -3  14   0  357.16   21.00
   3  14   0  349.47   30.40
   4 -14   0  815.02   34.30
  -4 -14   0  891.01   35.30
  -4 -14   0  836.92   33.40
   4 -14   0  890.91   38.90
   4  14   0  886.61   31.80
  -4  14   0  830.42   34.80
   4  14   0  802.82   43.30
   4  14   0  872.21   34.90
   4  14   0  827.02   37.90
  -4  14   0  835.62   31.70
  -4  14   0  847.02   41.20
  -5 -14   0  292.87   24.50
   5 -14   0  314.47   27.20
  -5 -14   0  267.67   20.40
   5 -14   0  312.77   22.40
  -5  14   0  305.07   30.50
   5  14   0  300.57   23.70
  -5  14   0  278.97   22.20
   5  14   0  300.37   20.00
   5  14   0  253.67   32.90
  -5  14   0  248.18   19.20
   5  14   0  266.57   24.50
   6 -14   0  210.88   27.20
  -6 -14   0  157.38   18.60
  -6 -14   0  140.09   15.70
   6  14   0  150.38   25.40
   6  14   0  164.78   19.20
  -6  14   0  115.59   20.70
   6  14   0  116.39   16.50
  -6  14   0   80.79   22.50
  -6  14   0  127.39   15.30
   6  14   0   29.50   28.40
  -7 -14   0   38.20   17.60
  -7 -14   0   13.60   11.60
   7 -14   0    6.10   18.20
   7 -14   0   -9.60   14.30
  -7  14   0  -13.80   11.60
  -7  14   0    7.80   19.70
  -7  14   0    6.40   13.90
   7  14   0  -36.00   22.40
   7  14   0   19.90   14.60
   7  14   0   -1.30   13.40
   7  14   0    8.60   16.20
   8 -14   0  -26.40   21.10
  -8 -14   0    1.80   20.50
  -8 -14   0   -1.70   12.90
   8 -14   0   -7.80   17.80
  -8  14   0   24.80   21.40
   8  14   0   34.70   18.00
   8  14   0    5.20   18.00
   8  14   0  -16.40   16.30
  -8  14   0    9.90   16.90
   8  14   0    8.40   27.60
  -8  14   0   17.40   14.50
  -9 -14   0    7.60   15.50
   9 -14   0   54.29   21.10
  -9 -14   0   44.70   23.00
   9  14   0   19.20   18.50
  -9  14   0   15.40   16.40
   9  14   0   35.80   21.30
  -9  14   0   -4.40   26.20
  -9  14   0   -1.60   19.40
 -10 -14   0    9.60   27.60
  10 -14   0  -14.40   23.10
  10 -14   0   33.80   28.50
 -10 -14   0  -12.30   16.60
  10  14   0   10.00   21.20
 -10  14   0    0.60   18.90
 -10  14   0  -46.90   27.30
  10  14   0  -48.10   20.50
 -11 -14   0   15.60   33.90
  11 -14   0   30.20   33.40
 -11 -14   0   -1.00   20.40
  11 -14   0   13.50   25.40
 -11  14   0   33.50   21.00
  11  14   0  -26.80   24.10
  11  14   0   -9.10   24.60
 -11  14   0   13.00   34.10
 -12 -14   0  -19.40   22.00
  12 -14   0    6.80   30.60
  12 -14   0  -13.30   38.10
  12  14   0    5.50   29.30
 -12  14   0   46.40   23.90
   0 -15   0    2.20    7.50
   0  15   0   -5.70   18.00
   0  15   0   -3.60    8.00
   0  15   0   -8.20   15.20
   1 -15   0   67.19   14.90
  -1 -15   0   50.49   10.00
   1 -15   0   44.40    9.00
  -1  15   0   38.30    9.60
   1  15   0   49.00   18.40
   1  15   0   66.79   11.00
   1  15   0   54.69    9.40
  -1  15   0   24.20   18.50
  -1  15   0   49.70    9.60
   2 -15   0   -9.70   13.50
  -2 -15   0    7.20    8.60
  -2  15   0    8.60   16.90
   2  15   0    4.40    9.70
   2  15   0   16.60    7.90
  -2  15   0   14.10    9.40
   2  15   0   18.40   18.00
  -2  15   0   24.40    8.40
  -3 -15   0  410.76   21.90
   3 -15   0  386.46   28.20
   3  15   0  378.76   23.90
   3  15   0  387.36   35.10
  -3  15   0  410.86   23.50
   3  15   0  429.26   21.10
  -3  15   0  450.95   34.50
   3  15   0  390.56   19.00
   4 -15   0   40.40   15.50
  -4 -15   0   27.00   10.40
   4  15   0   41.50   11.30
  -4  15   0   30.40   18.20
  -4  15   0   20.40   10.60
   4  15   0   10.50   13.70
   4  15   0   30.90   12.20
   4  15   0    6.40   19.60
  -4  15   0   44.30   10.90
   5 -15   0  265.87   29.20
  -5 -15   0  243.78   24.20
  -5 -15   0  282.57   21.50
   5  15   0  241.28   20.20
   5  15   0  258.57   29.00
   5  15   0  316.27   24.40
  -5  15   0  283.37   20.60
  -5  15   0  226.98   28.60
  -5  15   0  250.77   31.60
   6 -15   0  136.59   18.30
  -6 -15   0  162.28   20.20
  -6 -15   0  187.88   20.50
   6 -15   0  138.89   22.40
  -6  15   0  118.79   16.10
   6  15   0  151.18   27.80
   6  15   0  167.48   16.10
   6  15   0  169.28   20.60
  -6  15   0  165.68   23.70
  -6  15   0  199.58   22.10
   6  15   0  158.88   18.20
   7 -15   0   85.29   18.20
   7 -15   0  110.39   23.60
  -7 -15   0  106.89   16.60
  -7 -15   0  124.79   21.20
   7  15   0  121.49   19.00
  -7  15   0  152.38   19.10
  -7  15   0  108.19   16.50
  -7  15   0  170.48   24.20
   7  15   0  111.29   16.50
   7  15   0   94.89   29.10
   7  15   0  112.19   20.60
   8 -15   0   33.20   20.00
  -8 -15   0   68.99   16.40
  -8  15   0   32.10   19.00
   8  15   0   25.60   19.90
  -8  15   0   39.30   17.20
   8  15   0   39.20   20.10
   8  15   0   78.79   18.50
   8  15   0   41.00   31.20
  -8  15   0   79.79   25.00
  -9 -15   0   -8.30   24.00
  -9 -15   0   -7.70   16.10
   9 -15   0  -17.80   21.30
   9 -15   0   30.40   27.00
   9  15   0  -15.50   19.70
   9  15   0  -16.30   19.40
  -9  15   0   25.90   28.20
  -9  15   0   -5.50   17.20
  10 -15   0   55.59   31.40
  10 -15   0   69.69   25.90
 -10 -15   0  109.79   29.60
 -10 -15   0   96.59   21.00
  10  15   0   50.29   23.80
 -10  15   0   44.00   20.10
  10  15   0  114.49   25.60
 -10  15   0  148.69   34.60
  11 -15   0  -22.40   29.50
 -11 -15   0   -5.30   21.30
  11 -15   0   50.19   36.60
 -11  15   0   22.20   21.60
 -11  15   0   41.80   38.60
  11  15   0    9.40   26.50
   0 -16   0  220.58   17.30
   0  16   0  240.08   18.10
   0  16   0  221.58   18.70
   0  16   0  226.18   27.00
  -1 -16   0   90.79   11.90
   1  16   0   85.59   12.60
  -1  16   0   57.49   21.30
   1  16   0   65.79   10.80
   1  16   0   87.99   22.00
  -1  16   0   62.59   11.50
  -1  16   0   71.09   11.50
   2 -16   0  419.06   29.90
  -2 -16   0  396.76   22.20
   2  16   0  416.06   20.90
   2  16   0  382.16   23.60
  -2  16   0  369.86   35.40
  -2  16   0  374.06   22.60
   2  16   0  371.86   36.50
  -3 -16   0   80.09   12.30
   3 -16   0   62.89   18.00
   3  16   0   75.69   13.90
  -3  16   0   66.39   12.50
  -3  16   0   73.49   21.40
   3  16   0   52.89   21.90
  -4 -16   0   43.90   12.10
   4 -16   0   34.60   17.30
  -4  16   0    9.40   19.20
   4  16   0   28.90   16.70
  -4  16   0   39.20   12.00
   4  16   0   35.90   13.90
  -4  16   0   41.50   21.10
   4  16   0   22.80   22.00
  -5 -16   0  212.38   21.30
   5 -16   0  239.98   24.10
  -5 -16   0  215.28   25.10
   5 -16   0  199.98   19.70
   5  16   0  249.97   27.90
  -5  16   0  207.28   22.90
   5  16   0  191.18   20.60
   5  16   0  201.78   30.40
  -5  16   0  201.88   21.90
  -5  16   0  264.57   34.20
   5  16   0  206.88   25.30
   6 -16   0  130.59   19.20
  -6 -16   0  129.89   17.10
  -6 -16   0  118.79   19.70
   6 -16   0   83.89   22.60
   6  16   0  100.29   15.80
  -6  16   0   82.99   24.00
   6  16   0  132.39   21.20
  -6  16   0  110.99   16.90
   6  16   0  107.99   19.10
   6  16   0   99.29   30.60
  -6  16   0  101.99   16.30
  -7 -16   0   15.50   20.40
  -7 -16   0   18.60   15.10
   7 -16   0   31.50   18.20
   7 -16   0   84.29   26.70
  -7  16   0   35.80   17.70
  -7  16   0   64.89   25.80
   7  16   0   38.70   19.30
   7  16   0  -15.60   29.30
  -7  16   0   30.70   15.80
   7  16   0   33.60   16.70
   7  16   0   23.10   18.80
   8 -16   0    1.70   25.40
  -8 -16   0   -2.10   15.50
   8 -16   0  -20.40   20.80
  -8 -16   0   55.89   24.00
  -8  16   0   17.60   27.80
   8  16   0   15.60   21.30
  -8  16   0  -26.90   15.50
   8  16   0    0.50   18.00
   9 -16   0    5.60   23.20
  -9 -16   0   16.80   17.60
  -9 -16   0   47.60   27.90
   9 -16   0  -10.60   29.50
  -9  16   0   20.40   18.60
   9  16   0   19.70   21.10
  -9  16   0   16.10   31.40
   9  16   0  -36.20   20.10
  10 -16   0  -51.49   32.10
  10 -16   0   53.89   28.30
 -10 -16   0   39.00   21.10
 -10 -16   0   47.20   30.50
  10  16   0   35.50   41.70
  10  16   0  -19.50   24.30
 -10  16   0   71.09   22.20
 -10  16   0   64.19   35.20
  11 -16   0   -9.40   31.80
 -11 -16   0   26.60   22.70
  11 -16   0   47.20   40.00
 -11  16   0   43.70   23.60
  11  16   0   16.10   28.20
   0 -17   0   -2.20    9.30
   0  17   0   18.20    9.60
   0  17   0   31.40   22.60
   0  17   0    5.60   11.00
  -1 -17   0    6.10    9.70
  -1  17   0    8.20   22.40
  -1  17   0    4.00   10.60
   1  17   0   -5.10    8.90
  -1  17   0  -16.40    9.40
   1  17   0   10.60   22.80
   1  17   0   -7.40   11.00
   2 -17   0  386.56   30.80
  -2 -17   0  320.07   22.30
   2  17   0  298.17   20.20
   2  17   0  349.96   39.40
  -2  17   0  310.67   21.20
   2  17   0  314.37   24.30
  -2  17   0  352.26   23.00
  -2  17   0  342.87   37.50
  -3 -17   0  220.18   20.30
   3 -17   0  245.08   30.10
   3  17   0  167.68   17.70
   3  17   0  221.98   28.90
  -3  17   0  286.27   33.40
  -3  17   0  265.47   29.40
   3  17   0  238.88   31.30
  -4 -17   0  163.48   20.40
   4 -17   0  141.49   28.80
   4  17   0  131.49   18.10
   4  17   0  195.78   22.90
  -4  17   0  152.28   17.30
  -4  17   0  180.38   26.00
   4  17   0  157.68   29.90
  -5 -17   0   -8.60   12.70
   5 -17   0   -2.80   24.60
   5  17   0   19.00   27.00
   5  17   0    4.50   17.70
  -5  17   0    4.70   22.70
   5  17   0    3.80   16.40
  -5  17   0  -15.70   13.30
   5  17   0  -18.30   12.80
  -5  17   0   -1.70   13.20
   6 -17   0   -9.50   21.50
   6 -17   0  -14.90   17.10
  -6 -17   0   -0.10   14.10
   6  17   0   26.20   30.60
  -6  17   0    6.70   25.50
   6  17   0  -12.10   19.80
  -6  17   0  -31.40   15.30
   6  17   0    3.20   18.30
  -6  17   0   26.90   15.60
   6  17   0   36.10   14.80
  -7 -17   0   12.80   16.00
  -7 -17   0   33.50   22.70
   7 -17   0   -9.70   19.40
   7 -17   0   35.70   24.80
   7  17   0   32.10   16.90
  -7  17   0   21.30   16.30
  -7  17   0   15.60   28.90
   7  17   0   39.30   21.00
  -8 -17   0  -30.10   24.00
   8 -17   0   50.39   22.10
  -8 -17   0    8.80   17.40
   8 -17   0   -0.60   28.00
   8  17   0   17.40   19.70
  -8  17   0   25.70   18.40
  -8  17   0    9.60   31.60
   8  17   0   14.50   22.60
  -9 -17   0   93.89   30.10
  -9 -17   0  108.39   23.00
   9 -17   0   44.40   32.80
   9 -17   0  116.69   25.70
   9  17   0   92.79   26.10
   9  17   0   86.79   23.20
  -9  17   0  105.79   35.70
  -9  17   0   32.80   20.30
 -10 -17   0   70.49   23.20
  10 -17   0   51.49   29.90
  10 -17   0   80.99   35.70
 -10  17   0   76.79   23.90
  10  17   0   24.20   26.80
   0  18   0  125.19   16.00
   0  18   0  140.59   15.20
   0  18   0  144.09   30.20
  -1 -18   0  172.68   19.40
  -1  18   0  184.38   29.70
  -1  18   0  148.09   16.10
   1  18   0  193.98   31.10
   1  18   0  147.09   16.80
  -1  18   0  144.89   15.50
   1  18   0  162.98   15.40
  -2 -18   0   61.49   13.30
   2 -18   0   41.00   19.40
   2  18   0   65.79   15.10
  -2  18   0   60.39   26.80
   2  18   0   58.29   11.10
   2  18   0   80.39   28.50
   3 -18   0   19.10   19.60
  -3  18   0   47.10   25.90
   3  18   0   30.80   14.60
  -3  18   0   19.00   13.00
   3  18   0   44.80   20.60
   3  18   0   16.20   28.00
   4 -18   0   49.20   21.30
  -4 -18   0   23.90   13.70
  -4  18   0   21.30   14.60
   4  18   0   29.30   16.60
   4  18   0   46.80   30.70
  -4  18   0   75.39   27.50
   4  18   0   79.79   20.60
   5 -18   0    7.10   23.30
  -5 -18   0   -3.70   14.00
   5  18   0   14.10   19.60
   5  18   0    1.10   17.90
  -5  18   0   31.50   15.40
  -5  18   0   12.70   28.50
  -6 -18   0  135.39   19.90
   6 -18   0  150.18   21.30
   6 -18   0  100.49   27.20
  -6  18   0  103.19   19.40
   6  18   0  116.49   24.40
  -6  18   0  120.09   32.50
   6  18   0  106.79   18.00
   7 -18   0   -4.80   21.60
  -7 -18   0    0.60   17.30
  -7 -18   0   -9.40   23.40
   7 -18   0   15.10   27.40
   7  18   0  -31.40   18.80
   7  18   0   -1.40   22.40
  -7  18   0    8.80   31.70
  -7  18   0   15.90   17.70
  -8 -18   0   84.09   28.40
   8 -18   0   99.29   33.10
   8 -18   0   96.39   26.10
  -8 -18   0   45.60   20.10
  -8  18   0  161.08   38.40
   8  18   0   74.79   25.50
  -8  18   0   48.80   19.50
   8  18   0   68.29   22.30
   9 -18   0   14.80   34.10
   9 -18   0   69.69   28.50
  -9 -18   0   21.90   21.20
  -9 -18   0   70.69   30.70
  -9  18   0   -8.00   21.40
   9  18   0   79.69   29.30
   0  19   0   -9.10   13.40
   0  19   0   13.40   10.70
   0  19   0   21.60   28.70
   1  19   0  -12.60   28.00
  -1  19   0  -26.10   13.60
   1  19   0   -3.40   14.90
   1  19   0   20.40   11.80
  -1  19   0  -13.40   28.90
  -2 -19   0   79.39   21.50
  -2  19   0   94.89   15.40
  -2  19   0  118.29   31.40
   2  19   0  105.69   13.60
  -2  19   0  119.89   16.20
   2  19   0   73.39   17.50
   2  19   0  110.09   34.00
   3 -19   0   16.50   22.00
  -3 -19   0   53.09   14.50
  -3  19   0   65.49   30.00
   3  19   0    6.70   17.30
   3  19   0   44.10   12.80
   3  19   0    8.60   34.00
   3  19   0   10.20   21.20
  -3  19   0   27.80   14.70
   4 -19   0   39.80   24.00
  -4 -19   0   -3.20   14.10
  -4  19   0   24.90   29.10
  -4  19   0   21.10   16.20
   4  19   0   23.00   19.10
   4  19   0  -24.80   19.00
  -5 -19   0   13.00   15.70
   5 -19   0   -1.50   26.00
  -5  19   0   13.50   30.70
   5  19   0   52.69   22.90
  -5  19   0   -4.00   15.70
   6 -19   0   25.50   29.10
  -6 -19   0  -11.60   16.70
  -6  19   0  -26.90   16.90
   6  19   0  -54.99   21.30
  -6  19   0    0.10   32.50
   6  19   0   -6.80   18.10
  -7 -19   0   37.00   19.10
   7 -19   0   74.69   24.30
   7 -19   0   14.30   31.20
   7  19   0   12.90   26.50
  -7  19   0   29.60   19.80
   7  19   0   22.10   27.00
  -8 -19   0   39.10   20.50
   8 -19   0   41.30   33.60
  -8 -19   0   13.00   30.20
   8 -19   0   99.79   26.80
   8  19   0   49.20   28.20
  -8  19   0   16.00   21.00
   0  20   0  165.18   62.29
   0  20   0  183.58   23.00
   0  20   0  214.38   20.70
  -1  20   0   66.99   16.50
  -1  20   0   59.89   34.90
   1  20   0   63.79   18.00
   1  20   0   73.69   13.90
  -1  20   0   67.79   15.00
  -2  20   0   43.40   15.70
  -2  20   0   76.09   16.50
  -2  20   0   71.49   33.70
   2  20   0   73.39   19.60
   2  20   0   78.79   13.90
  -3 -20   0   55.49   16.40
  -3  20   0   20.70   16.20
   3  20   0   54.29   21.20
  -3  20   0   22.40   37.50
   3  20   0   11.40   22.10
  -4 -20   0   19.00   16.50
   4 -20   0    4.90   25.70
   4  20   0   17.80   23.30
  -4  20   0   -1.00   16.70
   4  20   0    5.70   24.30
  -5 -20   0   39.90   18.40
   5 -20   0   91.89   29.40
  -5  20   0   61.29   19.10
   5  20   0   57.89   24.60
   6 -20   0   25.90   30.90
  -6 -20   0   62.49   19.30
  -6  20   0   29.90   19.70
   6  20   0    3.80   24.60
  -6  20   0   -1.40   31.90
  -7 -20   0   32.00   20.10
   7 -20   0   61.29   34.40
   7  20   0   13.70   23.00
   7  20   0  -11.70   27.80
  -7  20   0   49.90   21.70
   0  21   0  -15.30   13.70
   0  21   0   10.20   18.30
  -1  21   0   27.40   15.40
   1  21   0   14.40   20.10
   1  21   0   42.20   15.40
  -1  21   0   23.80   18.80
  -2  21   0   73.59   19.00
   2  21   0   91.79   23.10
   2  21   0   85.99   15.00
   3  21   0   44.10   14.50
   3  21   0   24.00   24.50
   3  21   0   -2.60   18.50
   3  21   0    9.10   22.20
  -3  21   0   -9.10   17.00
   4 -21   0   52.29   28.40
  -4 -21   0   27.90   18.40
  -4  21   0    5.70   18.20
   4  21   0  -24.70   25.00
  -5 -21   0   37.50   19.30
   5 -21   0   21.10   31.80
  -5  21   0   -7.70   19.00
   5  21   0   37.40   27.40
  -6 -21   0   78.89   21.30
   6 -21   0   71.29   35.10
  -6  21   0   59.69   22.30
   6  21   0   10.60   29.40
   0  22   0   -6.90   21.50
   0  22   0    2.20   15.60
  -1  22   0    7.20   17.00
   1  22   0   17.80   24.00
  -1  22   0   24.00   21.10
   1  22   0   38.20   15.10
   2  22   0   57.99   28.70
   2  22   0   20.70   24.50
  -2  22   0   34.10   18.30
   2  22   0   21.20   15.50
   3  22   0   56.99   23.30
   3  22   0   45.80   17.30
   3  22   0   46.40   26.00
  -3  22   0   41.60   19.50
   4  22   0   42.00   28.50
  -4  22   0   73.79   21.40
   5 -22   0   15.80   33.60
  -5  22   0    7.90   21.40
   5  22   0   25.20   29.80
   0  23   0   16.70   25.10
   0  23   0   30.90   17.90
  -1  23   0   14.70   19.30
  -1  23   0   42.70   25.40
   1  23   0   24.30   17.90
   1  23   0  -27.60   26.60
   2  23   0   31.50   27.80
   2  23   0   74.49   30.90
  -2  23   0   15.90   20.00
   2  23   0   52.29   18.50
  15   0  -1    0.50   30.90
 -15   0   1   55.39   41.20
  15   0  -1   38.70   30.90
  15   0  -1   24.60   33.30
 -14   0   1  -29.40   35.10
  14   0  -1  -38.30   24.20
  14   0  -1  -25.40   26.30
 -14   0   1   76.49   33.10
  14   0  -1    2.70   24.20
 -13   0   1   -2.80   29.90
  13   0  -1   -1.80   21.10
  13   0  -1   13.90   20.20
  13   0  -1   10.60   21.30
 -13   0   1   14.30   27.50
  12   0  -1   16.80   16.20
  12   0  -1   -6.80   17.60
  12   0  -1   20.40   16.50
 -12   0   1   28.50   23.40
 -12   0   1   12.70   27.90
  11   0  -1   16.30   22.50
  11   0  -1   27.90   13.80
 -11   0   1   26.20   18.80
  11   0  -1  -10.90   14.30
 -11   0   1    0.60   16.30
 -10   0   1    8.10    8.30
 -10   0   1  -13.20   13.50
  10   0  -1   -6.10   13.00
  10   0  -1   10.40   10.40
 -10   0   1    2.40    8.20
  10   0  -1    3.40   10.70
 -10   0   1  -10.60   15.50
   9   0  -1    6.00    9.30
   9   0  -1   -3.20   11.10
   9   0  -1    9.20    8.10
  -9   0   1    4.80    7.00
  -9   0   1   13.30    6.80
  -9   0   1   15.00   13.40
  -9   0   1   -7.40   11.70
  -8   0   1   23.60   11.20
  -8   0   1   27.70    6.50
  -8   0   1   22.10    6.50
   8   0  -1   32.80    7.60
   8   0  -1   23.50    9.20
   8   0  -1   18.80    9.70
  -8   0   1    4.10   10.60
  -7   0   1    2.20    5.40
   7   0  -1    2.00    7.30
  -7   0   1   24.20    8.80
   7   0  -1    1.40    7.60
  -7   0   1   10.10    5.20
  -7   0   1   18.30    8.70
   7   0  -1    8.20    6.30
  -6   0   1   -5.00    4.20
   6   0  -1    2.10    6.20
  -6   0   1   -6.10    6.80
   6   0  -1   -4.80    6.00
   6   0  -1   -1.20    4.80
  -6   0   1   -4.40    4.10
  -6   0   1   -1.50    6.70
   5   0  -1   49.70    7.10
   5   0  -1   41.40    6.60
  -5   0   1   47.00    7.30
  -5   0   1   39.50    6.90
  -5   0   1   33.50    4.70
   5   0  -1   45.20    5.40
  -5   0   1   39.40    4.90
   5   0  -1   40.50    6.50
  -4   0   1    3.30    3.00
  -4   0   1   -0.30    4.90
  -4   0   1   -2.40    3.00
   4   0  -1    0.70    4.00
   4   0  -1   -1.20    4.80
  -4   0   1   -3.00    4.60
   4   0  -1   -1.70    4.20
   4   0  -1    1.40    3.20
  -3   0   1   13.50    3.30
   3   0  -1   13.00    3.70
   3   0  -1   10.90    2.90
   3   0  -1   17.90    4.30
  -3   0   1   10.90    3.00
  -3   0   1   13.70    4.20
   2   0  -1   -1.80    3.00
   2   0  -1   -1.00    2.00
   2   0  -1    0.60    2.30
  -2   0   1   -2.70    2.00
  -2   0   1    1.70    2.20
  -2   0   1    4.30    3.60
  -2   0   1    3.50    2.90
  -2   0  -1   -0.60    3.50
   2   0   1   -0.30    2.50
  -2   0  -1    3.30    2.40
  -2   0  -1    2.00    3.00
   2   0   1    6.20    3.10
   2   0   1   -0.10    3.40
  -2   0  -1    0.20    2.60
  -3   0  -1   -0.80    2.50
   3   0   1   -0.80    3.80
  -3   0  -1   -3.10    3.70
   3   0   1   -3.00    2.80
  -3   0  -1   -8.10    4.40
   3   0   1   -4.20    4.10
  -4   0  -1   59.19    5.50
   4   0   1   52.49    6.20
  -4   0  -1   46.70    6.00
   4   0   1   32.50    5.40
   4   0   1   67.39    7.70
  -4   0  -1   48.10    5.40
  -4   0  -1   52.39    6.80
   5   0   1    0.90    4.40
  -5   0  -1   -8.50    6.30
   5   0   1   -3.20    5.30
  -5   0  -1   -4.90    4.40
  -5   0  -1   -1.40    3.40
  -5   0  -1   -2.00    5.70
   5   0   1   -2.40    5.20
  -6   0  -1   23.80    7.90
  -6   0  -1   29.20    6.00
   6   0   1   25.80    7.60
  -6   0  -1   21.90    4.90
   6   0   1   21.10    5.90
  -6   0  -1   26.50    7.90
   6   0   1   17.30    7.00
   7   0   1  131.69   13.00
  -7   0  -1  154.88   10.10
   7   0   1  159.78   12.00
  -7   0  -1  148.99   11.90
  -7   0  -1  142.89   14.80
   7   0   1  121.09   13.40
  -7   0  -1  103.39   12.60
  -7   0  -1  150.18   11.20
  -8   0  -1    0.10   11.30
  -8   0  -1   11.30    5.90
  -8   0  -1    0.90   10.30
   8   0   1   11.10    9.30
   8   0   1   11.90    8.50
  -8   0  -1   18.50    6.80
   8   0   1    7.70    7.50
  -9   0  -1   41.20   10.00
   9   0   1   36.40    9.70
  -9   0  -1   15.90    7.10
  -9   0  -1   25.90   12.50
  -9   0  -1   28.70    8.00
   9   0   1   18.20   10.80
   9   0   1   44.90   10.90
  10   0   1   11.30   11.80
  10   0   1    4.10   11.40
 -10   0  -1   14.10    8.70
  10   0   1   18.70   12.60
 -10   0  -1   20.50   15.60
 -10   0  -1   10.50    8.80
 -10   0  -1   29.90   15.80
 -11   0  -1  -34.90   18.20
 -11   0  -1   -2.20   10.30
  11   0   1   13.90   15.20
 -11   0  -1    7.30   18.40
  11   0   1  -13.50   13.20
  11   0   1   19.30   14.60
 -12   0  -1   45.80   23.00
 -12   0  -1  -25.90   12.10
 -12   0  -1    5.70   22.60
  12   0   1   -6.00   17.60
  12   0   1  -39.80   17.60
  12   0   1   -2.90   16.70
  13   0   1   24.80   21.20
 -13   0  -1    7.20   30.20
 -13   0  -1   26.70   28.60
  13   0   1   -3.90   21.30
  13   0   1   10.50   21.50
 -13   0  -1    0.20   15.30
  14   0   1  -23.20   26.90
 -14   0  -1  -52.09   37.10
 -14   0  -1   45.70   34.50
  14   0   1  -38.90   23.30
  14   0   1   17.80   26.50
  15   0   1  -15.20   40.50
  15   0   1   23.50   34.30
 -15   0  -1  102.69   45.40
  15   0   1   49.80   32.80
  15  -1  -1   24.90   31.60
  15  -1  -1   34.60   48.50
  15   1  -1   44.50   30.70
  15   1  -1  -20.30   32.90
 -15   1   1   65.59   42.40
  15   1  -1   93.79   33.00
 -14  -1   1  -47.30   36.20
 -14  -1   1   37.00   32.90
  14  -1  -1   71.29   25.60
  14  -1  -1    9.40   26.90
  14   1  -1  -29.60   25.20
 -14   1   1  -33.00   35.30
 -14   1   1   14.40   33.00
  14   1  -1   39.80   25.50
  14   1  -1    1.90   26.30
 -13  -1   1    3.50   29.80
  13  -1  -1  -18.90   19.40
 -13  -1   1   32.30   27.60
  13  -1  -1  -15.20   22.00
  13  -1  -1   -9.70   20.70
  13   1  -1  -33.10   19.70
 -13   1   1  -42.50   26.20
  13   1  -1   11.10   20.30
 -13   1   1  -67.79   28.60
  13   1  -1   10.90   20.70
  12  -1  -1   30.70   18.70
 -12  -1   1  -15.10   22.50
 -12  -1   1   -9.00   21.10
  12  -1  -1    9.20   17.60
 -12   1   1  -28.30   21.50
 -12   1   1    7.40   12.00
  12   1  -1   -8.10   15.80
 -12   1   1    2.00   16.70
 -12   1   1   25.50   22.40
  12   1  -1    9.40   17.00
  12   1  -1   -6.30   16.40
 -11  -1   1   63.09   19.00
  11  -1  -1   60.69   15.90
  11  -1  -1   53.29   13.60
 -11  -1   1  105.09   20.70
 -11  -1   1   70.39   12.70
  11  -1  -1   84.79   15.90
  11   1  -1  100.19   16.60
  11   1  -1   87.99   15.40
 -11   1   1   65.69   11.80
 -11   1   1   65.49   19.10
  11   1  -1   92.89   15.50
 -11   1   1   74.29   19.50
 -10  -1   1  146.69   15.70
  10  -1  -1  177.78   21.10
 -10  -1   1  160.98   20.00
  10  -1  -1  167.68   17.60
  10  -1  -1  160.98   19.30
 -10  -1   1  125.59   16.90
  10   1  -1  126.49   14.80
 -10   1   1  145.09   18.60
 -10   1   1  170.78   15.50
 -10   1   1  154.18   18.00
  10   1  -1  137.89   15.70
  10   1  -1  135.79   14.40
  -9  -1   1    3.10   13.80
   9  -1  -1    9.90    9.80
  -9  -1   1   -2.80    7.00
   9  -1  -1   -4.90    7.60
  -9  -1   1   -6.40   11.70
   9  -1  -1  -12.30   10.60
  -9   1   1    4.90   12.10
  -9   1   1  -13.40   11.00
   9   1  -1    5.70    8.80
  -9   1   1    1.60    6.50
   9   1  -1    6.90   10.70
   9   1  -1   -4.40    9.20
  -9   1   1   -3.30    7.00
  -8  -1   1  176.18   13.60
   8  -1  -1  239.08   17.00
  -8  -1   1  195.18   18.40
   8  -1  -1  193.78   13.90
  -8  -1   1  225.88   19.90
   8  -1  -1  231.98   17.60
  -8   1   1  164.08   12.90
  -8   1   1  227.38   18.20
  -8   1   1  253.47   18.90
   8   1  -1  190.68   15.10
  -8   1   1  227.08   13.80
   8   1  -1  208.38   17.30
   7  -1  -1  316.67   16.70
   7  -1  -1  267.17   13.80
  -7  -1   1  297.47   18.10
   7  -1  -1  301.87   16.90
  -7  -1   1  291.47   18.40
  -7  -1   1  286.27   14.20
  -7   1   1  282.67   13.90
   7   1  -1  287.57   14.90
  -7   1   1  256.37   13.20
   7   1  -1  284.67   16.70
   7   1  -1  282.67   16.50
  -7   1   1  299.67   17.60
  -7   1   1  313.17   17.50
  -6  -1   1   18.60    7.50
   6  -1  -1   -2.30    7.40
  -6  -1   1   15.80    4.80
  -6  -1   1    2.90    7.40
   6  -1  -1   16.00    7.00
   6  -1  -1   15.00    4.60
   6  -1  -1   15.90    6.50
  -6   1   1   14.70    4.80
  -6   1   1   -2.80    6.70
   6   1  -1   14.30    7.10
   6   1  -1   13.50    6.60
  -6   1   1   10.00    4.20
   6   1  -1   10.30    5.40
  -6   1   1    4.70    6.90
  -5  -1   1 1063.59   36.10
  -5  -1   1 1108.29   36.00
   5  -1  -1 1048.00   35.50
   5  -1  -1 1121.79   33.60
  -5  -1   1 1101.99   34.30
   5  -1  -1 1094.89   35.90
   5  -1  -1 1072.29   35.60
   5   1  -1 1143.29   35.90
   5   1  -1 1124.59   35.80
  -5   1   1 1118.49   34.40
  -5   1   1 1103.89   35.90
   5   1  -1 1113.79   34.30
  -5   1   1 1065.49   33.50
  -5   1   1 1099.99   35.70
  -4  -1   1  633.84   20.80
   4  -1  -1  656.93   22.10
  -4  -1   1  630.44   22.40
   4  -1  -1  635.74   20.10
   4  -1  -1  632.54   22.00
  -4  -1   1  631.74   22.00
   4  -1  -1  630.14   21.90
  -4   1   1  628.14   20.90
   4   1  -1  652.73   22.30
  -4   1   1  651.33   22.10
   4   1  -1  646.34   20.90
  -4   1   1  617.14   22.00
  -4   1   1  631.24   20.10
   4   1  -1  626.94   22.10
   3  -1  -1 2401.66   69.59
  -3  -1   1 2378.96   69.09
   3  -1  -1 2396.76   69.79
  -3  -1   1 2307.67   69.99
   3  -1  -1 2442.86   68.39
   3  -1  -1 2424.36   70.09
  -3  -1   1 2392.96   69.69
  -3   1   1 2431.96   69.79
  -3   1   1 2378.16   68.49
   3   1  -1 2277.87   69.59
   3   1  -1 2349.86   69.79
  -3   1   1 2367.46   69.69
  -3   1   1 2376.06   69.19
   3   1  -1 2410.46   68.99
  -2  -1   1  345.97   12.90
   2  -1  -1  373.76   12.40
   2  -1  -1  333.47   13.70
  -2  -1   1  346.07   12.60
   2  -1  -1  358.66   12.70
   2   1  -1  372.96   11.90
  -2   1   1  352.26   12.70
   2   1  -1  349.67   12.30
  -2   1   1  336.57   12.20
   2   1  -1  357.46   12.60
  -2   1   1  363.76   12.40
  -1   1   1   14.90    2.70
  -1  -1  -1  391.36   13.20
   1  -1   1  343.17   11.70
  -1  -1  -1  394.66   12.60
  -1   1  -1  406.36   12.40
   1   1   1  409.46   12.30
   1   1   1  383.66   12.70
   2  -1   1  112.59    6.50
  -2  -1  -1  110.99    7.60
  -2  -1  -1  109.49    6.60
   2   1   1  108.09    7.20
   2   1   1  112.99    6.20
   2   1   1  105.79    6.70
  -2   1  -1  116.09    6.30
  -2   1  -1  111.99    6.90
  -3  -1  -1 3312.27   91.09
  -3  -1  -1 3072.19   90.39
   3  -1   1 3138.49   89.29
   3  -1   1 3234.18   90.59
  -3  -1  -1 3083.09   89.69
   3  -1   1 2971.10   89.89
  -3   1  -1 3123.69   89.99
   3   1   1 3262.87   90.69
  -3   1  -1 3115.09   90.49
  -3   1  -1 3121.69   90.49
   3   1   1 3056.19   90.19
   3   1   1 3019.20   89.79
  -3   1  -1 3016.70   89.09
  -4  -1  -1 1137.79   35.00
   4  -1   1 1065.39   32.70
   4  -1   1 1128.79   34.40
  -4  -1  -1 1110.39   33.30
   4  -1   1 1044.50   33.70
  -4  -1  -1 1084.99   34.50
   4   1   1 1117.69   34.40
  -4   1  -1 1055.39   34.00
  -4   1  -1 1117.99   34.60
  -4   1  -1 1088.09   34.00
  -4   1  -1 1091.29   32.50
   4   1   1 1021.10   33.20
   4   1   1 1018.30   33.80
  -5  -1  -1   79.99   10.40
   5  -1   1   92.79    9.20
  -5  -1  -1   85.69    7.30
   5  -1   1   89.49    9.50
   5  -1   1   93.19    7.90
  -5  -1  -1   86.19    9.50
  -5   1  -1   83.19    8.80
  -5   1  -1  106.99    9.90
  -5   1  -1   91.39    9.10
  -5   1  -1   88.29    6.50
   5   1   1   89.09    9.70
   5   1   1   97.29    8.40
   5   1   1   73.89    9.20
   6  -1   1  425.26   18.00
   6  -1   1  386.56   17.30
   6  -1   1  386.06   15.90
  -6  -1  -1  405.96   15.80
  -6  -1  -1  368.76   18.70
  -6  -1  -1  408.76   19.70
   6   1   1  370.66   17.60
  -6   1  -1  383.96   16.60
   6   1   1  399.66   16.40
  -6   1  -1  409.96   19.00
  -6   1  -1  401.06   18.00
   6   1   1  433.36   18.50
  -6   1  -1  374.46   14.90
   7  -1   1  813.32   30.20
   7  -1   1  817.42   29.30
  -7  -1  -1  789.02   27.40
  -7  -1  -1  780.72   31.40
  -7  -1  -1  785.72   30.70
   7   1   1  790.72   30.20
  -7   1  -1  858.71   30.30
  -7   1  -1  828.52   28.20
   7   1   1  794.02   29.30
   7   1   1  795.32   28.30
  -7   1  -1  811.42   31.30
  -7   1  -1  785.72   26.50
  -8  -1  -1   -9.10    6.30
  -8  -1  -1    4.20   11.20
   8  -1   1    1.10    8.90
  -8  -1  -1    5.00   11.60
   8  -1   1    3.20    7.90
   8  -1   1   17.30    9.30
  -8   1  -1  -10.50    5.60
  -8   1  -1   16.30    7.00
   8   1   1   -1.90    9.10
   8   1   1    3.30    8.30
   8   1   1    0.20    8.60
  -8   1  -1   19.30   10.10
  -8   1  -1  -15.10   10.60
  -9  -1  -1   -6.90   12.90
   9  -1   1    2.30    8.80
   9  -1   1    2.40    9.50
  -9  -1  -1    9.20   13.60
  -9  -1  -1  -11.50    6.80
   9  -1   1  -12.70   10.20
   9   1   1   -0.30   10.40
   9   1   1   10.10   10.40
  -9   1  -1   -8.80   14.40
  -9   1  -1   16.30    8.60
  -9   1  -1   21.70    9.30
   9   1   1    4.90    9.70
  -9   1  -1  -16.40   11.40
  -9   1  -1   -6.80    6.60
  10  -1   1   19.40   12.10
 -10  -1  -1    3.40   15.30
  10  -1   1   41.40   13.90
 -10  -1  -1   30.50    9.20
 -10  -1  -1   11.40   16.00
  10  -1   1   48.20   11.70
  10   1   1   23.50   11.60
 -10   1  -1   49.80   16.20
 -10   1  -1   24.10   11.90
 -10   1  -1   34.40   16.30
 -10   1  -1   46.60   10.80
 -10   1  -1   47.90    8.80
  10   1   1   60.69   12.90
  11  -1   1   25.60   14.70
  11  -1   1   24.60   15.30
 -11  -1  -1   38.10   10.60
 -11  -1  -1   17.60   18.00
 -11  -1  -1   57.79   20.40
  11  -1   1   11.10   14.40
 -11   1  -1   36.00   11.50
 -11   1  -1   19.20   15.20
 -11   1  -1   34.40   19.60
 -11   1  -1   27.80   22.50
 -11   1  -1    8.10   10.00
  11   1   1    2.30   13.70
  11   1   1   27.00   15.80
  11   1   1   27.40   14.80
 -12  -1  -1   50.39   31.40
  12  -1   1   20.90   17.70
  12  -1   1    6.80   18.40
 -12  -1  -1    1.00   12.90
 -12  -1  -1   21.00   24.10
  12  -1   1    8.50   17.00
 -12   1  -1    4.00   12.10
  12   1   1   30.30   17.40
  12   1   1   30.20   18.20
 -12   1  -1   32.80   22.60
  12   1   1    4.10   16.70
 -12   1  -1   35.90   24.00
  13  -1   1  -10.10   18.90
 -13  -1  -1   15.40   15.10
 -13  -1  -1   48.20   31.20
 -13  -1  -1  113.49   31.70
  13  -1   1    3.00   21.80
  13  -1   1   35.30   29.90
 -13   1  -1  -12.30   28.60
  13   1   1   -3.00   19.10
 -13   1  -1  -15.60   27.30
  13   1   1   -5.10   21.40
  13   1   1    1.40   21.10
  14  -1   1  -16.40   24.40
  14  -1   1  -45.80   26.70
 -14  -1  -1   90.99   37.90
 -14  -1  -1  -19.20   37.10
  14  -1   1   28.90   27.20
 -14   1  -1    1.50   36.70
  14   1   1  -35.20   23.40
 -14   1  -1   10.20   35.80
  14   1   1   35.40   26.70
  14   1   1  -19.60   27.00
  15  -1   1   72.59   32.40
  15  -1   1    0.40   29.90
 -15   1  -1  -41.10   46.70
  15   1   1  -53.79   29.10
  15   1   1   -1.40   36.40
  15   1   1   -7.60   31.40
  15  -2  -1   73.49   33.80
  15  -2  -1  -11.70   30.70
  15   2  -1  -10.90   31.70
  15   2  -1   59.79   30.40
  15   2  -1  -19.50   34.80
 -15   2   1   66.19   43.40
  14  -2  -1   19.00   29.30
  14  -2  -1   54.19   24.80
 -14  -2   1   45.50   36.10
 -14  -2   1   35.90   51.49
  14   2  -1   46.40   26.60
 -14   2   1   54.89   33.50
 -14   2   1  -62.59   36.70
  14   2  -1   53.29   25.50
 -14   2   1   27.00   25.50
  13  -2  -1   31.80   22.60
 -13  -2   1  -28.20   25.80
  13  -2  -1    9.00   20.30
 -13  -2   1    3.10   31.20
 -13   2   1   24.10   28.30
  13   2  -1    0.00   18.70
  13   2  -1    8.10   20.70
 -13   2   1   36.00   15.50
 -13   2   1  -19.50   27.00
  13   2  -1   19.80   21.50
  12  -2  -1  -15.80   18.60
  12  -2  -1   15.00   17.50
 -12  -2   1   60.79   22.10
 -12  -2   1   74.79   24.90
 -12   2   1   24.70   13.30
 -12   2   1   -1.90   21.70
  12   2  -1   38.60   21.50
 -12   2   1    8.80   22.20
  12   2  -1   10.90   17.70
 -12   2   1   21.60   17.50
  12   2  -1   20.00   17.40
 -11  -2   1   32.10   19.50
  11  -2  -1   22.50   14.30
 -11  -2   1    8.40   18.20
 -11  -2   1   -7.40   11.40
  11  -2  -1   -0.10   15.90
 -11   2   1    4.60   17.50
  11   2  -1   28.50   14.20
 -11   2   1   -9.60   10.20
 -11   2   1  -27.70   17.20
  11   2  -1   10.20   13.70
  11   2  -1   16.90   14.10
  10  -2  -1   23.20   10.30
  10  -2  -1   10.00   12.60
 -10  -2   1    5.50   16.70
  10  -2  -1   12.50   13.10
 -10  -2   1   -1.30   14.40
 -10  -2   1   21.60    9.60
  10   2  -1   17.20   12.40
 -10   2   1   14.50    9.50
  10   2  -1   27.60   12.40
 -10   2   1   32.10   15.40
 -10   2   1   19.80   14.50
  10   2  -1   15.50   11.00
   9  -2  -1    8.10   11.30
  -9  -2   1   16.60   14.10
   9  -2  -1   -9.50   10.10
  -9  -2   1   -6.10   11.70
  -9  -2   1    9.10    7.60
   9  -2  -1   13.90    8.00
  -9   2   1   -3.40   11.60
   9   2  -1   -4.20   10.30
   9   2  -1   22.20    9.30
  -9   2   1   17.40    7.90
   9   2  -1   16.80   10.10
  -9   2   1   25.70   12.60
  -8  -2   1   29.10   11.70
   8  -2  -1   42.10   10.20
  -8  -2   1   31.80   12.30
  -8  -2   1   39.20    8.10
   8  -2  -1   16.10   10.80
   8   2  -1   45.20    9.20
  -8   2   1   43.70   11.50
   8   2  -1   50.79   10.00
   8   2  -1   46.30   10.60
  -8   2   1   38.90    8.00
  -8   2   1   35.90   10.80
   7  -2  -1  677.13   27.80
  -7  -2   1  741.23   25.60
  -7  -2   1  693.33   28.90
  -7  -2   1  738.53   28.70
   7  -2  -1  698.53   23.80
  -7   2   1  718.93   28.00
  -7   2   1  690.43   27.70
   7   2  -1  690.53   27.40
   7   2  -1  698.33   25.60
  -7   2   1  735.93   25.60
   7   2  -1  725.43   27.70
  -6  -2   1  382.56   18.50
  -6  -2   1  374.76   18.80
   6  -2  -1  324.47   18.50
  -6  -2   1  368.86   15.70
   6   2  -1  374.16   16.10
   6   2  -1  419.96   18.00
  -6   2   1  362.46   15.80
   5  -2  -1  747.63   26.10
   5  -2  -1  698.13   26.40
  -5  -2   1  762.92   24.70
  -5  -2   1  751.62   26.40
  -5  -2   1  706.03   26.50
   5  -2  -1  729.33   26.10
   5   2  -1  717.43   24.70
  -5   2   1  724.63   26.00
  -5   2   1  754.52   25.00
  -5   2   1  742.93   25.90
   5   2  -1  755.12   26.50
   5   2  -1  734.13   25.90
  -4  -2   1  362.16   13.70
  -4  -2   1  354.66   15.30
   4  -2  -1  373.76   14.80
   4  -2  -1  351.76   15.30
   4  -2  -1  369.36   15.00
  -4  -2   1  340.47   14.80
   4   2  -1  368.96   14.00
   4   2  -1  341.67   14.50
  -4   2   1  358.56   14.60
   4   2  -1  345.07   14.90
  -4   2   1  345.27   13.90
  -4   2   1  338.37   14.70
   3  -2  -1  289.57   11.50
  -3  -2   1  281.97   12.20
   3  -2  -1  285.57   12.00
  -3  -2   1  273.77   11.30
   3  -2  -1  234.98   11.90
  -3  -2   1  262.97   10.70
   3   2  -1  281.07   11.40
  -3   2   1  247.98   11.00
  -3   2   1  279.57   11.80
   3   2  -1  257.57   10.80
  -3   2   1  284.07   11.40
   3   2  -1  278.87   11.80
  -2  -2   1  497.55   16.90
   2  -2  -1  496.05   16.30
   2  -2  -1  464.95   16.40
   2  -2  -1  479.35   16.70
  -2  -2   1  484.75   15.90
   2   2  -1  478.05   15.90
  -2   2   1  483.95   16.30
   2   2  -1  499.55   15.80
  -2   2   1  490.95   16.30
  -2   2   1  458.55   16.50
   2   2  -1  488.75   16.60
  -1  -2   1 1019.90   30.90
   1  -2  -1 1028.20   31.00
   1  -2  -1 1043.70   30.60
  -1  -2   1 1048.80   30.40
   1  -2  -1 1031.40   30.80
  -1  -2   1 1023.70   29.80
   1   2  -1  994.60   30.80
   1   2  -1 1032.90   29.80
  -1   2   1 1013.70   30.50
  -1   2   1 1014.90   30.90
  -1   2   1 1032.30   30.70
   1   2  -1 1043.60   30.30
   0  -2  -1  999.50   29.20
   0  -2  -1 1011.70   30.30
   0  -2  -1 1060.29   29.10
   0   2  -1  983.00   29.70
   0   2   1  983.10   30.20
   0   2   1 1027.70   29.70
   0   2  -1  947.61   30.40
  -1  -2  -1    0.00    2.00
   1  -2   1    1.20    1.90
   1  -2   1   -1.70    2.40
   1   2   1   -1.70    2.50
  -1   2  -1    1.20    1.90
  -1   2  -1   -0.50    2.20
   1   2   1   -1.70    1.90
   2  -2   1 2549.84   75.59
  -2  -2  -1 2682.03   76.29
  -2  -2  -1 2587.64   76.39
   2  -2   1 2606.84   75.59
  -2  -2  -1 2653.93   75.59
   2   2   1 2735.43   76.09
   2   2   1 2546.55   76.09
  -2   2  -1 2620.04   76.39
  -2   2  -1 2584.04   75.59
   2   2   1 2672.43   75.69
  -2   2  -1 2564.04   75.39
  -3  -2  -1   58.39    5.80
  -3  -2  -1   68.99    7.40
   3  -2   1   54.99    6.50
  -3  -2  -1   63.09    6.40
   3  -2   1   59.19    6.30
   3   2   1   55.49    6.10
   3   2   1   50.59    6.30
  -3   2  -1   56.39    6.30
  -3   2  -1   59.19    5.60
  -3   2  -1   58.49    7.30
   3   2   1   70.59    6.40
  -4  -2  -1  772.72   24.40
  -4  -2  -1  764.62   26.10
  -4  -2  -1  756.42   25.80
   4  -2   1  730.73   25.00
   4  -2   1  742.63   24.80
   4   2   1  772.72   25.60
  -4   2  -1  725.23   25.30
  -4   2  -1  737.33   25.20
   4   2   1  766.12   25.10
   4   2   1  732.13   24.40
  -4   2  -1  729.73   24.60
  -5  -2  -1  200.38   10.10
   5  -2   1  182.48   11.80
   5  -2   1  204.18   11.80
  -5  -2  -1  193.08   13.80
  -5  -2  -1  177.68   13.10
   5   2   1  205.68   11.10
  -5   2  -1  194.38   12.40
  -5   2  -1  198.38   11.80
   5   2   1  201.38   11.20
   5   2   1  195.38   12.20
  -5   2  -1  186.58   11.70
  -6  -2  -1  178.98   14.80
  -6  -2  -1  169.18   15.50
  -6  -2  -1  180.28   10.90
   6  -2   1  189.28   13.00
   6  -2   1  172.08   12.30
   6   2   1  186.18   12.10
  -6   2  -1  189.78   12.20
   6   2   1  186.18   13.30
   6   2   1  212.88   13.10
  -6   2  -1  169.58   13.30
  -6   2  -1  181.78   13.90
  -7  -2  -1   65.19   10.70
   7  -2   1   85.49    9.80
  -7  -2  -1   70.49    7.60
   7  -2   1   78.79    9.70
  -7  -2  -1   62.69   11.70
   7  -2   1   60.39    8.90
  -7   2  -1   88.29   11.60
  -7   2  -1  102.89   11.30
   7   2   1   95.69   12.10
   7   2   1   65.49    8.10
   7   2   1   77.69    9.90
  -7   2  -1   76.39   10.50
  -8  -2  -1   29.80   12.50
   8  -2   1   28.20   10.30
  -8  -2  -1   41.90    7.70
  -8  -2  -1   21.00   11.60
   8  -2   1   32.70    8.00
   8  -2   1   24.00    9.60
   8   2   1   58.09   10.40
   8   2   1   39.80    9.10
  -8   2  -1   45.80   11.30
  -8   2  -1   20.40   11.00
  -8   2  -1   31.80    8.40
   8   2   1   27.60   10.10
  -9  -2  -1   17.70   14.40
   9  -2   1   19.80   10.80
  -9  -2  -1   10.70    7.30
   9  -2   1   20.60   10.10
   9  -2   1   10.70    8.60
  -9  -2  -1   23.70   13.60
   9   2   1    3.20    9.60
  -9   2  -1   -1.80    8.30
   9   2   1    1.80   10.60
  -9   2  -1   14.40   14.20
   9   2   1    1.70    9.90
  -9   2  -1   33.20   13.10
 -10  -2  -1  110.89   12.30
 -10  -2  -1  115.09   18.20
  10  -2   1   90.39   14.50
 -10  -2  -1   98.59   18.90
  10  -2   1   90.69   15.50
 -10   2  -1   93.99   17.20
  10   2   1   95.79   14.30
 -10   2  -1   86.69   12.20
 -10   2  -1  105.79   18.00
 -10   2  -1  103.19   12.90
 -10   2  -1   90.79   13.40
  10   2   1   84.39   14.30
  10   2   1  118.89   15.10
 -11  -2  -1  153.48   18.30
  11  -2   1   96.69   18.50
  11  -2   1   96.89   16.20
  11  -2   1   98.79   15.20
 -11  -2  -1  119.69   22.00
 -11  -2  -1  114.39   22.10
 -11   2  -1  102.69   21.60
  11   2   1   92.59   17.50
  11   2   1  111.79   16.40
  11   2   1  120.99   17.00
 -11   2  -1  121.49   14.20
 -11   2  -1  100.69   20.90
 -11   2  -1   82.69   16.40
 -12  -2  -1    0.10   23.60
 -12  -2  -1  -18.00   12.50
  12  -2   1    9.30   17.60
 -12  -2  -1   -2.70   24.40
  12  -2   1  -21.30   18.90
  12   2   1   -7.80   15.60
 -12   2  -1   18.40   13.80
  12   2   1   -1.10   18.80
 -12   2  -1   71.59   23.40
 -12   2  -1   36.30   24.50
  12   2   1    7.80   17.80
 -12   2  -1  -24.40   18.40
 -13  -2  -1  -15.30   31.90
  13  -2   1   51.09   21.10
 -13  -2  -1   39.60   15.80
 -13  -2  -1  118.19   31.50
 -13   2  -1   61.19   22.80
 -13   2  -1   58.29   28.10
  13   2   1   68.59   23.70
 -13   2  -1   18.80   29.20
 -13   2  -1   87.79   17.00
  13   2   1   25.40   20.50
  13   2   1   57.99   21.40
  14  -2   1   47.80   27.80
 -14  -2  -1   27.80   38.90
 -14  -2  -1   22.30   37.10
 -14  -2  -1   17.20   32.10
  14  -2   1   23.00   26.90
 -14   2  -1   20.00   17.90
  14   2   1   25.40   26.90
 -14   2  -1   23.50   36.50
 -14   2  -1   15.30   36.30
  14   2   1  -13.70   27.80
  14   2   1   26.50   25.30
  15  -2   1   64.69   33.90
  15  -2   1  -10.00   30.60
  15   2   1  -62.09   29.70
  15   2   1   22.30   31.20
  15   2   1    2.80   38.10
 -15   2  -1   34.40   47.80
  15  -3  -1  148.69   36.40
  15  -3  -1   29.80   32.20
  15   3  -1  -10.50   31.40
  15   3  -1   38.60   31.80
 -15   3   1   74.29   45.00
  15   3  -1   43.60   35.50
 -15   3   1   92.69   33.40
  14  -3  -1   10.40   30.00
  14  -3  -1   -6.90   35.60
 -14   3   1   39.60   18.00
 -14   3   1    9.30   26.40
  14   3  -1   -3.10   26.00
  14   3  -1  -32.90   23.40
  14   3  -1  -10.40   28.00
 -14   3   1   16.40   35.60
 -14   3   1   -7.90   34.80
 -13  -3   1   -2.00   33.10
  13  -3  -1   32.90   23.90
 -13  -3   1   19.70   28.00
  13  -3  -1   33.50   20.80
  13   3  -1  -12.50   20.50
 -13   3   1  -27.50   26.90
 -13   3   1   -4.60   25.80
 -13   3   1    1.40   14.20
  13   3  -1  -30.90   21.10
 -13   3   1  -17.60   19.80
  13   3  -1  -14.10   19.30
 -12  -3   1   -9.10   24.40
 -12  -3   1    0.40   12.90
 -12  -3   1  -22.50   22.20
  12  -3  -1   21.80   18.00
  12  -3  -1   -1.10   20.10
  12   3  -1   -7.40   16.00
  12   3  -1   -5.40   24.80
 -12   3   1   39.40   21.60
 -12   3   1   49.00   23.50
 -12   3   1   15.10   13.70
  12   3  -1  -27.60   16.50
  11  -3  -1   46.70   15.80
 -11  -3   1   52.59   22.40
  11  -3  -1   78.59   17.80
 -11  -3   1   50.29   13.00
 -11  -3   1   63.29   19.40
  11   3  -1   54.29   15.00
  11   3  -1   40.90   14.80
 -11   3   1   68.79   12.60
 -11   3   1   31.10   18.10
 -11   3   1   34.20   18.90
  11   3  -1   37.40   14.90
 -10  -3   1   56.39   18.90
 -10  -3   1   12.00   15.20
  10  -3  -1   15.10   12.80
 -10  -3   1   21.80   10.60
  10  -3  -1   36.20   14.50
  10   3  -1   18.50   12.40
  10   3  -1   32.90   13.10
 -10   3   1   27.80   10.30
 -10   3   1   29.20   23.40
  10   3  -1   40.20   12.30
 -10   3   1   47.70   15.10
  -9  -3   1   27.30    9.20
  -9  -3   1   70.39   15.90
   9  -3  -1   19.10   11.30
  -9  -3   1   31.90   12.80
   9  -3  -1   29.20   12.40
  -9   3   1   42.80    9.90
  -9   3   1   28.00   13.30
   9   3  -1   46.10   11.30
   9   3  -1   53.19   12.10
  -9   3   1   48.90   12.80
   9   3  -1   55.89   11.50
   8  -3  -1  268.07   18.50
  -8  -3   1  258.67   15.90
   8  -3  -1  228.08   19.00
  -8  -3   1  257.77   21.30
   8   3  -1  263.87   18.30
  -8   3   1  280.97   16.10
  -8   3   1  300.07   19.00
   8   3  -1  272.67   18.50
  -8   3   1  302.97   20.10
   8   3  -1  245.58   17.50
  -7  -3   1  611.44   23.60
  -7  -3   1  633.04   26.70
   7  -3  -1  619.04   25.60
  -7  -3   1  638.14   27.60
   7  -3  -1  621.34   25.90
  -7   3   1  631.74   25.60
   7   3  -1  631.94   25.30
  -7   3   1  630.84   24.00
  -7   3   1  605.54   25.70
   7   3  -1  653.83   25.50
   7   3  -1  621.14   23.90
   6  -3  -1   20.20    7.80
  -6  -3   1   22.40    8.10
   6  -3  -1   24.60    7.00
  -6  -3   1   41.80    9.20
  -6  -3   1   17.30    5.70
   6  -3  -1   25.70    9.00
   6   3  -1   25.00   10.20
  -6   3   1   22.60    6.50
  -6   3   1   26.70    7.40
  -6   3   1   17.30    7.40
   6   3  -1   16.70    6.80
   6   3  -1   15.50    6.20
  -5  -3   1   28.10    5.30
   5  -3  -1   24.60    6.20
  -5  -3   1   22.00    7.20
   5  -3  -1   20.90    6.70
  -5  -3   1   34.70    7.40
   5  -3  -1   29.30    7.90
   5   3  -1   23.10    5.70
  -5   3   1   25.80    5.70
  -5   3   1   29.30    6.70
  -5   3   1   41.20    7.20
   5   3  -1   21.30    6.30
   5   3  -1   35.70    7.40
  -4  -3   1   26.30    6.30
   4  -3  -1   19.50    6.30
  -4  -3   1   28.70    4.60
   4  -3  -1   31.40    6.00
  -4  -3   1   27.70    5.90
   4  -3  -1   32.70    5.60
  -4   3   1   34.20    6.10
   4   3  -1   23.50    5.30
  -4   3   1   21.50    5.00
   4   3  -1   22.70    5.00
   4   3  -1   34.50    5.80
  -4   3   1   27.40    5.50
   3  -3  -1  638.04   22.70
   3  -3  -1  691.43   22.50
  -3  -3   1  670.23   21.80
  -3  -3   1  671.13   23.20
   3  -3  -1  656.03   23.00
  -3   3   1  649.04   22.50
  -3   3   1  676.33   22.10
   3   3  -1  677.93   22.70
  -3   3   1  661.83   22.30
   3   3  -1  678.63   21.80
   3   3  -1  687.03   22.00
   2  -3  -1  714.43   22.30
  -2  -3   1  685.73   23.00
  -2  -3   1  579.44   21.20
   2  -3  -1  659.03   22.60
   2  -3  -1  700.23   22.60
  -2  -3   1  692.83   21.80
   2   3  -1  723.83   21.80
  -2   3   1  697.83   22.00
  -2   3   1  682.73   22.70
   2   3  -1  697.73   22.70
   2   3  -1  704.53   21.40
  -2   3   1  705.63   22.30
   1  -3  -1  462.25   15.40
   1  -3  -1  436.46   16.10
  -1  -3   1  424.46   14.00
  -1  -3   1  466.25   14.80
   1  -3  -1  430.36   15.30
  -1   3   1  441.36   16.10
  -1   3   1  463.15   15.20
   1   3  -1  428.86   15.70
   1   3  -1  468.35   14.70
  -1   3   1  432.56   15.10
   0  -3   1    5.60    2.30
   0  -3   1    8.70    4.50
   0  -3  -1    2.30    2.60
   0  -3  -1    8.50    2.40
   0  -3  -1    8.10    2.80
   0  -3  -1    6.10    3.90
   0   3  -1    5.80    3.60
   0   3  -1    6.80    2.20
   0   3   1    8.40    3.50
   0   3   1    5.40    4.10
   0   3   1    7.00    2.50
   0   3  -1    8.90    3.60
   0   3   1    6.20    2.70
   1  -3   1  292.77    9.70
  -1  -3  -1  295.17    9.60
   1  -3   1  259.27   11.90
  -1  -3  -1  317.07   10.60
  -1   3  -1  280.87   12.00
  -1   3  -1  300.77    9.70
  -1   3  -1  276.67   11.60
   1   3   1  282.47   12.20
   1   3   1  305.07   10.60
   1   3   1  264.07   11.20
   2  -3   1   98.59    7.20
   2  -3   1  110.19    6.00
  -2  -3  -1  107.49    6.50
  -2   3  -1   90.49    8.10
   2   3   1   99.59    7.40
   2   3   1   93.29    7.40
  -2   3  -1  103.19    7.30
  -2   3  -1  100.59    6.20
   2   3   1  105.99    6.70
  -3  -3  -1  405.36   15.70
  -3  -3  -1  392.26   14.20
   3  -3   1  384.26   14.30
   3  -3   1  357.46   14.50
  -3  -3  -1  393.86   15.90
   3   3   1  384.56   14.30
   3   3   1  405.76   15.10
  -3   3  -1  387.86   14.50
  -3   3  -1  365.96   15.40
  -3   3  -1  379.76   14.30
   3   3   1  395.16   15.10
   4  -3   1  155.88   10.00
   4  -3   1  152.48    9.70
  -4  -3  -1  168.58    9.20
  -4  -3  -1  168.58   11.40
  -4  -3  -1  170.78   11.60
   4   3   1  143.29    9.40
  -4   3  -1  150.68   10.50
  -4   3  -1  149.29   10.10
  -4   3  -1  157.98   10.10
   4   3   1  159.48   10.90
   4   3   1  168.48   10.00
   5  -3   1  200.98   12.10
  -5  -3  -1  194.18   11.00
  -5  -3  -1  202.38   13.80
   5  -3   1  209.08   12.20
  -5  -3  -1  193.28   14.50
   5   3   1  218.78   12.20
  -5   3  -1  195.28   12.60
   5   3   1  202.08   11.90
   5   3   1  210.88   14.20
  -5   3  -1  196.58   12.40
  -5   3  -1  210.58   12.10
   6  -3   1  950.60   32.70
  -6  -3  -1  919.81   34.00
  -6  -3  -1  960.90   34.30
  -6  -3  -1  959.60   31.30
   6  -3   1  943.01   32.50
  -6   3  -1  916.41   32.00
   6   3   1  921.91   32.10
  -6   3  -1  920.51   32.40
   6   3   1  914.11   31.50
   6   3   1  955.70   32.80
  -6   3  -1  940.51   32.80
  -7  -3  -1  548.45   21.50
   7  -3   1  550.14   23.40
  -7  -3  -1  508.85   25.90
   7  -3   1  530.35   23.40
  -7  -3  -1  537.95   25.70
  -7   3  -1  551.74   24.10
   7   3   1  544.75   22.60
  -7   3  -1  544.95   22.90
   7   3   1  565.04   23.40
  -7   3  -1  568.74   23.70
   7   3   1  583.84   23.90
  -8  -3  -1  401.86   25.10
  -8  -3  -1  416.66   19.50
   8  -3   1  401.56   21.90
  -8  -3  -1  434.76   25.20
   8  -3   1  416.86   22.20
   8   3   1  414.66   21.40
   8   3   1  415.76   21.80
  -8   3  -1  431.86   22.00
  -8   3  -1  420.46   20.70
  -8   3  -1  379.46   23.00
   8   3   1  436.66   22.10
   9  -3   1   11.80   11.60
  -9  -3  -1   17.80   14.00
  -9  -3  -1   17.70    8.60
  -9  -3  -1   11.10   15.00
   9  -3   1   31.00   11.30
  -9   3  -1   27.60   14.70
   9   3   1   15.20   10.70
   9   3   1   35.30   11.00
   9   3   1   26.20   11.60
  -9   3  -1   23.10    9.70
  -9   3  -1    8.60   13.10
  10  -3   1   30.60   13.10
 -10  -3  -1   30.70   18.30
  10  -3   1   20.80   14.90
 -10  -3  -1   31.10   17.40
 -10  -3  -1   20.80   10.20
 -10   3  -1   30.30   15.50
 -10   3  -1   19.10   11.20
 -10   3  -1    4.40   15.80
  10   3   1   21.60   13.40
  10   3   1   38.40   13.00
  10   3   1   36.50   13.10
 -11  -3  -1   26.50   21.50
 -11  -3  -1   34.60   20.70
 -11  -3  -1   17.80   11.30
  11  -3   1   12.10   15.60
  11  -3   1   18.90   16.90
 -11   3  -1   18.40   18.30
 -11   3  -1   25.50   12.60
 -11   3  -1   14.30   15.50
  11   3   1   34.40   15.20
 -11   3  -1  -23.60   18.10
  11   3   1   -0.30   14.10
  11   3   1   23.10   15.70
 -12  -3  -1   39.40   27.10
  12  -3   1   60.79   18.20
 -12  -3  -1   46.30   25.70
 -12  -3  -1   43.80   13.80
  12  -3   1   37.60   20.10
 -12   3  -1   52.89   14.30
 -12   3  -1   33.60   23.40
  12   3   1   51.19   17.80
  12   3   1   -2.80   18.30
 -12   3  -1   22.10   18.80
  12   3   1   52.79   18.20
 -12   3  -1   17.70   22.90
 -13  -3  -1   47.00   32.90
 -13  -3  -1  -29.20   29.70
 -13  -3  -1  -22.00   15.30
  13  -3   1  -12.30   20.00
 -13   3  -1  -47.60   21.60
  13   3   1   11.20   23.40
 -13   3  -1   25.00   15.60
  13   3   1   -2.20   19.70
  13   3   1   -6.20   20.80
 -13   3  -1  -12.30   27.80
 -13   3  -1   19.70   27.60
 -14  -3  -1  -15.90   37.90
  14  -3   1  -26.10   26.10
 -14  -3  -1  -21.10   19.40
 -14  -3  -1    9.50   38.40
  14  -3   1   35.90   29.00
 -14   3  -1  -35.70   29.10
 -14   3  -1  -13.20   37.10
  14   3   1   26.40   26.50
  14   3   1  -24.60   30.00
 -14   3  -1  -26.00   35.30
  14   3   1  -12.90   24.80
 -14   3  -1   13.80   19.30
  15  -3   1   -4.10   31.90
  15  -3   1   56.19   35.20
 -15   3  -1  -22.30   36.90
 -15   3  -1    7.10   35.80
 -15   3  -1   17.30   48.20
  15   3   1  -11.30   31.00
  15   3   1   35.90   37.00
  15   3   1   30.00   31.50
  15  -4  -1   26.20   33.40
  15  -4  -1   63.39   37.50
 -15   4   1   -2.40   21.80
  15   4  -1   11.00   32.10
 -15   4   1  -75.79   34.60
  15   4  -1  -44.00   31.00
 -15   4   1   49.80   43.90
  15   4  -1  105.69   56.99
  14  -4  -1   40.60   32.10
 -14  -4   1   43.40   36.50
  14  -4  -1  -21.70   26.40
 -14   4   1  -23.20   35.10
  14   4  -1   -1.60   23.80
 -14   4   1   -0.60   34.30
  14   4  -1   -7.00   26.20
  14   4  -1  -45.50   28.40
 -14   4   1   25.40   18.70
 -14   4   1   37.40   27.60
 -13  -4   1  164.18   35.80
 -13  -4   1  148.19   30.90
  13  -4  -1   77.59   26.50
  13  -4  -1   77.69   23.30
  13   4  -1   71.49   23.20
 -13   4   1   64.79   16.50
 -13   4   1   82.49   27.40
  13   4  -1   73.19   21.20
 -13   4   1   58.99   22.30
  13   4  -1   74.09   23.10
 -13   4   1   67.59   28.80
 -12  -4   1   44.90   27.10
  12  -4  -1   39.40   18.40
 -12  -4   1   37.60   15.30
  12  -4  -1   45.50   21.10
 -12  -4   1    7.60   24.40
  12   4  -1   30.20   18.00
  12   4  -1   19.70   16.70
 -12   4   1   30.90   23.10
  12   4  -1   25.80   18.80
 -12   4   1   47.00   21.90
 -12   4   1    5.70   13.70
 -11  -4   1  -14.60   18.70
  11  -4  -1  -24.20   15.10
  11  -4  -1   31.60   17.80
 -11  -4   1    8.20   11.70
 -11  -4   1  -30.20   21.30
  11   4  -1    3.90   14.40
 -11   4   1    7.20   17.90
 -11   4   1   -5.40   17.80
  11   4  -1    8.40   15.10
  11   4  -1   -2.30   13.80
 -11   4   1   15.80   12.30
  10  -4  -1   22.90   14.80
  10  -4  -1   10.10   13.30
 -10  -4   1   20.50   16.10
 -10  -4   1   -4.40    9.90
 -10  -4   1   16.30   18.90
  10   4  -1   10.30   12.20
  10   4  -1  -12.60   12.30
  10   4  -1   36.10   12.60
 -10   4   1   28.50   15.10
 -10   4   1    1.40   15.20
 -10   4   1   12.50   10.20
   9  -4  -1   82.29   13.40
   9  -4  -1   47.80   13.40
  -9  -4   1   62.99   16.90
  -9  -4   1   46.50   15.00
  -9  -4   1   65.49   10.70
  -9   4   1   57.09    9.90
   9   4  -1   57.59   12.10
   9   4  -1   61.89   12.20
   9   4  -1   70.29   12.90
  -9   4   1   64.59   13.90
  -9   4   1   57.29   13.30
   8  -4  -1   57.09   12.10
  -8  -4   1   64.79    9.00
  -8  -4   1   80.89   14.70
   8  -4  -1   76.39   12.20
  -8  -4   1   55.29   13.00
   8   4  -1   66.39   11.10
   8   4  -1   78.59   12.30
   8   4  -1   74.49   11.80
  -8   4   1   81.09    9.90
  -8   4   1   82.19   12.80
  -8   4   1   48.30   11.20
   7  -4  -1  -11.70   10.30
  -7  -4   1   -0.40    5.90
   7  -4  -1    2.00    7.30
  -7  -4   1    0.30   10.60
  -7  -4   1    6.70    9.70
   7  -4  -1    7.30    8.80
  -7   4   1    0.40    8.20
  -7   4   1    3.40    8.70
   7   4  -1   -0.30    7.00
   7   4  -1   -8.40    6.50
  -7   4   1  -10.10    6.30
  -6  -4   1   24.90    9.30
  -6  -4   1   27.60    6.10
   6  -4  -1   29.30    9.40
  -6  -4   1   34.30    9.00
   6  -4  -1   25.80    7.90
   6  -4  -1   24.70    7.20
   6   4  -1   32.00    6.80
  -6   4   1   24.90    7.30
  -6   4   1   24.50    7.90
   6   4  -1   25.30    7.30
  -6   4   1   31.30    6.80
   6   4  -1   46.70    9.20
   5  -4  -1  196.68   15.20
   5  -4  -1  218.38   12.70
  -5  -4   1  209.78   14.10
  -5  -4   1  214.68   14.60
   5  -4  -1  209.78   13.70
  -5  -4   1  198.28   11.50
  -5   4   1  240.78   13.10
   5   4  -1  196.88   12.00
  -5   4   1  208.68   13.50
  -5   4   1  221.58   12.50
   5   4  -1  217.08   13.10
   5   4  -1  218.98   13.30
   4  -4  -1   17.30    5.20
  -4  -4   1   16.00    6.50
  -4  -4   1   23.90    4.80
   4  -4  -1    6.20    6.50
   4  -4  -1   23.70    6.10
  -4   4   1    8.80    5.20
  -4   4   1   23.50    5.50
  -4   4   1   25.60    6.30
   4   4  -1   15.20    5.40
   4   4  -1   18.50    5.70
   4   4  -1   11.00    5.00
   3  -4  -1   17.10    4.40
   3  -4  -1   23.70    5.80
  -3  -4   1   19.70    3.90
  -3  -4   1   13.50    5.70
   3  -4  -1   12.50    5.10
   3   4  -1   24.20    4.30
   3   4  -1   19.20    4.30
  -3   4   1   21.60    4.80
  -3   4   1   14.80    4.50
   3   4  -1   21.20    5.10
  -3   4   1   21.70    5.40
   2  -4  -1   42.10    5.70
   2  -4  -1   42.30    5.80
  -2  -4   1   39.90    4.20
   2  -4  -1   45.20    5.90
  -2  -4   1   38.10    4.60
  -2   4   1   46.80    5.70
  -2   4   1   36.50    5.80
  -2   4   1   42.70    4.90
   2   4  -1   42.30    4.40
   2   4  -1   48.00    5.30
   2   4  -1   41.60    5.30
   1  -4  -1 4139.39  121.49
  -1  -4   1 4338.07  120.99
   1  -4  -1 4196.98  121.49
   1  -4  -1 4215.78  122.29
   1   4  -1 4281.07  120.79
  -1   4   1 4157.88  121.29
  -1   4   1 4220.78  122.29
  -1   4   1 4144.39  121.19
   1   4  -1 4273.87  120.59
   0  -4  -1 1637.94   48.50
   0  -4  -1 1687.23   48.20
   0  -4   1 1585.14   49.50
   0  -4   1 1740.23   49.00
   0  -4  -1 1588.84   49.80
   0   4   1 1747.33   48.00
   0   4  -1 1577.14   49.60
   0   4  -1 1656.73   48.80
   0   4   1 1620.54   49.99
   0   4   1 1509.05   48.80
   0   4  -1 1740.73   48.00
   0   4   1 1659.33   48.30
   1  -4   1  638.74   21.50
  -1  -4  -1  654.93   19.80
  -1  -4  -1  666.63   20.30
  -1  -4  -1  585.94   21.00
   1  -4   1  602.04   19.50
  -1   4  -1  641.14   19.30
  -1   4  -1  623.34   21.60
  -1   4  -1  635.24   21.40
   1   4   1  677.63   20.30
   1   4   1  620.04   21.00
   1   4   1  641.44   22.30
   1   4   1  636.14   19.60
   2  -4   1   16.80    4.60
  -2  -4  -1   18.90    3.70
   2  -4   1   19.50    3.30
   2   4   1   15.00    4.50
  -2   4  -1   16.50    3.40
  -2   4  -1   14.00    4.60
   2   4   1    9.10    3.50
  -2   4  -1   21.70    4.70
  -3  -4  -1  322.57   12.90
   3  -4   1  308.17   13.50
   3  -4   1  333.07   12.60
  -3   4  -1  312.87   14.30
   3   4   1  316.97   13.20
  -3   4  -1  316.07   12.60
   3   4   1  328.67   13.80
  -3   4  -1  318.97   13.60
   3   4   1  330.07   14.10
  -4  -4  -1  105.19    8.00
  -4  -4  -1   93.89   11.00
   4  -4   1   98.19    8.50
   4  -4   1  110.39    9.90
  -4  -4  -1   94.29    9.40
   4   4   1  103.69    8.90
   4   4   1  103.49   10.10
  -4   4  -1   93.49    9.80
  -4   4  -1   80.79    8.80
  -4   4  -1   96.19    9.30
   4   4   1  117.09    9.50
  -5  -4  -1   17.90    8.60
   5  -4   1   30.30    6.50
   5  -4   1   26.00    6.70
  -5  -4  -1   37.20    5.90
  -5  -4  -1   26.90    8.00
   5   4   1   40.70    8.00
  -5   4  -1   30.40    6.80
   5   4   1   28.30    6.00
   5   4   1   31.20    6.70
  -5   4  -1   26.20    7.00
  -5   4  -1   23.80    6.80
   6  -4   1   21.40    7.80
  -6  -4  -1   32.40    9.60
   6  -4   1   27.50    6.90
  -6  -4  -1   34.00    9.30
  -6  -4  -1   27.50    5.90
   6   4   1   33.60    6.80
  -6   4  -1   33.70    7.80
  -6   4  -1   33.40    7.40
   6   4   1   31.00    7.70
  -6   4  -1   26.20    7.70
  -7  -4  -1  373.26   21.80
   7  -4   1  348.07   18.30
  -7  -4  -1  335.47   16.80
  -7  -4  -1  361.46   22.10
   7  -4   1  370.56   19.20
   7   4   1  356.36   18.20
  -7   4  -1  355.86   18.50
   7   4   1  356.46   18.20
   7   4   1  370.76   19.30
  -7   4  -1  360.16   19.50
  -7   4  -1  347.07   19.00
   8  -4   1  185.58   16.40
   8  -4   1  142.79   17.20
  -8  -4  -1  167.98   13.40
  -8  -4  -1  197.58   21.30
   8   4   1  163.48   16.40
   8   4   1  163.48   16.20
  -8   4  -1  171.38   15.50
  -8   4  -1  164.18   18.20
  -8   4  -1  144.89   17.60
  -9  -4  -1   22.70    9.40
  -9  -4  -1   47.80   16.00
  -9  -4  -1   49.60   15.60
   9  -4   1   35.90   12.10
   9  -4   1   42.70   12.90
   9   4   1   30.30   12.60
   9   4   1   35.20   12.20
   9   4   1   35.70   12.20
  -9   4  -1   38.80   10.20
  -9   4  -1   31.30   15.30
  10  -4   1   22.90   15.80
  10  -4   1   -4.50   12.70
 -10  -4  -1   12.50   18.60
 -10  -4  -1    3.30    9.80
 -10  -4  -1  -13.10   17.00
  10   4   1   26.50   12.50
  10   4   1   16.70   14.10
 -10   4  -1    8.50   11.50
 -10   4  -1   -8.50   15.50
 -10   4  -1   19.10   15.10
  10   4   1   24.50   13.00
 -11  -4  -1  167.58   19.60
 -11  -4  -1  128.29   23.20
 -11  -4  -1  163.18   25.00
  11  -4   1  157.38   19.20
  11  -4   1  187.38   21.70
 -11   4  -1  216.68   22.60
 -11   4  -1  175.68   19.10
  11   4   1  133.29   19.50
  11   4   1  153.48   18.50
 -11   4  -1  187.08   22.10
  11   4   1  172.78   18.80
 -11   4  -1  163.58   23.30
 -12  -4  -1   64.39   15.30
 -12  -4  -1   14.70   25.60
 -12  -4  -1   -3.90   26.30
  12  -4   1    1.60   16.90
  12  -4   1   62.89   21.40
  12   4   1   44.00   17.30
 -12   4  -1   25.80   23.20
  12   4   1  -21.70   19.20
 -12   4  -1   38.80   22.90
 -12   4  -1   56.69   15.40
 -12   4  -1   12.20   18.80
  13  -4   1   34.50   26.60
 -13  -4  -1   34.90   34.10
 -13  -4  -1   -1.90   16.70
 -13  -4  -1   25.30   30.20
  13  -4   1   63.59   45.00
  13   4   1   27.10   25.80
  13   4   1   43.20   22.10
 -13   4  -1  -32.60   28.20
 -13   4  -1   60.39   17.80
 -13   4  -1   41.10   28.30
 -13   4  -1   17.80   23.10
  13   4   1   42.80   21.40
 -14  -4  -1   71.09   65.39
  14  -4   1   73.99   31.30
 -14  -4  -1   29.70   21.40
  14  -4   1   88.09   27.60
  14   4   1   35.20   27.20
 -14   4  -1  -23.20   36.90
 -14   4  -1    0.80   37.00
  14   4   1   14.40   24.30
  14   4   1   27.80   32.10
 -14   4  -1  -26.30   28.90
  15  -4   1  175.98   39.50
  15  -4   1   85.69   34.10
 -15   4  -1   60.49   45.10
  15   4   1  109.19   31.00
  15   4   1   74.49   33.40
 -15   4  -1  126.99   24.80
 -15   4  -1   60.59   39.50
  15  -5  -1   54.59   36.10
  15  -5  -1   50.09   38.70
 -15   5   1   32.00   24.00
 -15   5   1  -37.60   42.70
  15   5  -1  -54.99   29.00
  15   5  -1   61.09   31.80
 -15   5   1   11.10   36.80
 -14  -5   1  -29.40   33.80
  14  -5  -1    7.60   27.70
  14  -5  -1   44.50   32.70
  14   5  -1  -42.10   29.20
 -14   5   1  -15.50   28.30
 -14   5   1   49.10   35.80
  14   5  -1  -11.00   25.60
 -14   5   1   22.80   18.80
  14   5  -1   34.90   25.70
 -14   5   1  -61.29   34.70
 -13  -5   1    6.40   33.40
 -13  -5   1  -17.80   30.20
  13  -5  -1   18.50   26.90
 -13  -5   1  -10.70   17.80
 -13   5   1   55.99   16.80
  13   5  -1    6.10   20.40
  13   5  -1    5.60   22.20
 -13   5   1  -23.30   27.90
 -13   5   1   53.59   28.40
  13   5  -1   -9.00   24.60
 -12  -5   1   -2.70   28.00
  12  -5  -1   34.60   19.00
 -12  -5   1   43.70   25.10
  12  -5  -1  -21.00   21.40
 -12  -5   1   13.80   15.60
 -12   5   1   10.80   13.70
  12   5  -1   16.70   17.60
  12   5  -1  -14.70   18.70
 -12   5   1    9.40   22.10
 -12   5   1   15.20   22.70
  12   5  -1   -4.60   17.70
 -11  -5   1  106.79   24.20
  11  -5  -1   59.49   19.60
  11  -5  -1  100.79   17.80
 -11  -5   1   68.59   13.60
 -11  -5   1   55.79   20.80
  11   5  -1   52.49   16.40
  11   5  -1   66.19   17.10
 -11   5   1   81.69   20.00
 -11   5   1   79.89   14.40
  11   5  -1   80.29   16.60
 -11   5   1   94.09   19.80
 -10  -5   1   69.89   12.50
 -10  -5   1   70.79   18.70
  10  -5  -1   39.00   16.70
 -10  -5   1   36.70   19.40
  10  -5  -1   59.09   14.60
 -10   5   1   87.59   16.50
  10   5  -1   49.40   14.00
  10   5  -1   59.59   14.50
 -10   5   1   88.09   12.70
 -10   5   1   78.59   16.60
  10   5  -1   69.99   14.20
  -9  -5   1  200.38   17.80
  -9  -5   1  275.07   25.00
   9  -5  -1  262.27   23.50
  -9  -5   1  233.58   27.40
   9  -5  -1  239.08   21.20
  -9   5   1  229.48   21.60
   9   5  -1  197.58   20.50
   9   5  -1  261.47   20.70
   9   5  -1  251.87   19.80
  -9   5   1  241.58   23.20
  -9   5   1  229.98   18.50
   8  -5  -1    8.90    9.60
  -8  -5   1   25.60   12.10
   8  -5  -1   20.80   11.50
  -8  -5   1   32.20   14.50
  -8  -5   1    9.90    7.70
   8   5  -1   10.00    9.70
  -8   5   1    8.70   10.40
   8   5  -1   28.80   10.20
  -8   5   1   14.30    8.20
  -8   5   1   10.00   10.50
   8   5  -1   24.40    9.70
   7  -5  -1   21.60    8.00
  -7  -5   1   -1.30    6.40
  -7  -5   1   20.60   11.40
   7  -5  -1   28.40   12.20
  -7  -5   1   16.50   10.30
   7  -5  -1   19.60    9.00
  -7   5   1   25.20    9.00
  -7   5   1    5.20    8.70
   7   5  -1   12.80    7.80
   7   5  -1   12.90    9.40
  -7   5   1   13.00    7.80
   7   5  -1   19.90    8.50
   6  -5  -1   -6.40    8.00
   6  -5  -1   -1.50    8.70
  -6  -5   1   -1.20    8.30
  -6  -5   1    0.50    7.90
  -6  -5   1   -7.60    5.00
   6  -5  -1    3.50    6.50
  -6   5   1  -10.30    7.30
  -6   5   1   -1.20    6.10
   6   5  -1    6.20    6.90
  -6   5   1   -4.40    6.70
   6   5  -1   -1.50    7.50
   6   5  -1   -6.00    5.80
  -5  -5   1   -2.60    4.60
   5  -5  -1    5.60    5.80
   5  -5  -1  -15.80    7.60
  -5  -5   1    2.10    7.40
   5  -5  -1    6.50    7.20
  -5   5   1    6.30    5.90
  -5   5   1    4.50    5.60
   5   5  -1    0.30    5.50
   5   5  -1    7.20    6.50
   5   5  -1    5.00    5.90
  -5   5   1    0.70    6.80
  -4  -5   1  192.88   13.90
   4  -5  -1  193.78   13.90
   4  -5  -1  189.68   12.70
  -4  -5   1  220.28   11.00
   4  -5  -1  209.28   11.60
   4   5  -1  200.58   11.50
   4   5  -1  205.58   12.50
  -4   5   1  226.38   12.10
  -4   5   1  196.98   12.80
  -4   5   1  218.08   11.40
   4   5  -1  208.58   11.40
   3  -5  -1   58.29    7.10
  -3  -5   1   65.99    6.80
  -3  -5   1   61.49    6.60
   3  -5  -1   50.89    7.30
   3  -5  -1   64.69    7.00
  -3   5   1   60.99    7.30
  -3   5   1   69.99    7.60
   3   5  -1   65.79    7.20
   3   5  -1   63.09    8.00
  -3   5   1   64.09    7.60
   3   5  -1   61.29    7.30
  -2  -5   1   58.59    6.00
  -2  -5   1   57.49    6.90
   2  -5  -1   60.49    6.90
   2  -5  -1   52.29    6.60
   2  -5  -1   62.79    6.80
  -2   5   1   70.49    7.10
  -2   5   1   59.99    7.20
   2   5  -1   67.39    6.00
  -2   5   1   58.79    6.40
   2   5  -1   60.49    7.60
   2   5  -1   60.19    6.30
   1  -5  -1   86.59    7.90
   1  -5  -1   65.99    6.20
   1  -5  -1   79.09    7.00
  -1  -5   1   95.99    6.20
   1  -5  -1   91.29    8.70
  -1   5   1   90.39    6.80
  -1   5   1   87.49    5.30
   1   5  -1   93.89    6.50
  -1   5   1   89.29    9.20
   1   5  -1   82.39    8.80
   1   5  -1   89.39    6.40
  -1   5   1   83.89    7.10
   0  -5  -1  430.86   17.10
   0  -5   1  414.46   16.50
   0  -5  -1  436.76   14.50
   0  -5  -1  440.76   15.50
   0  -5   1  448.66   14.60
   0   5  -1  435.56   15.50
   0   5  -1  414.56   16.90
   0   5   1  464.05   14.60
   0   5   1  390.46   15.70
   0   5   1  412.76   17.30
   0   5   1  400.36   15.80
   0   5  -1  452.75   14.40
   0   5   1  434.66   14.90
  -1  -5  -1  205.18    9.00
  -1  -5  -1  206.28    8.80
  -1  -5  -1  194.78   10.40
   1  -5   1  202.68   10.80
   1   5   1  207.78   11.80
  -1   5  -1  182.48   11.10
  -1   5  -1  192.88    7.70
   1   5   1  204.28    8.20
   1   5   1  190.08   10.10
  -1   5  -1  203.28   10.40
   1   5   1  216.78    9.20
  -2  -5  -1  493.75   18.50
   2  -5   1  493.95   16.70
  -2  -5  -1  503.75   17.40
   2  -5   1  484.95   18.50
   2   5   1  502.75   17.90
  -2   5  -1  506.25   16.40
  -2   5  -1  481.15   18.50
   2   5   1  506.35   17.50
  -2   5  -1  487.95   18.80
   3  -5   1   70.39    6.60
  -3  -5  -1   82.49    7.30
   3  -5   1   73.89    9.10
   3   5   1   81.49    8.70
  -3   5  -1   67.19    7.00
  -3   5  -1   81.09    9.20
  -3   5  -1   70.29    8.70
   3   5   1   66.49    7.60
   3   5   1   75.49    8.70
  -4  -5  -1   29.40    5.30
   4  -5   1   27.20    5.50
   4  -5   1   21.60    6.60
   4   5   1   27.60    6.30
  -4   5  -1   22.40    6.60
   4   5   1   35.10    6.20
   4   5   1   37.30    6.80
  -4   5  -1   32.90    6.00
  -4   5  -1   24.80    6.20
   5  -5   1   25.80    7.80
  -5  -5  -1   15.30    9.10
   5  -5   1   17.70    6.10
  -5  -5  -1   28.80    8.50
  -5  -5  -1   23.60    5.70
   5   5   1   30.20    7.00
   5   5   1   27.70    6.50
  -5   5  -1   30.10    7.30
  -5   5  -1   28.60    7.10
   5   5   1   17.60    7.50
  -5   5  -1   20.00    6.50
  -6  -5  -1   50.49    7.00
   6  -5   1   61.09    9.30
   6  -5   1   56.19    7.90
  -6  -5  -1   57.09   10.80
  -6  -5  -1   47.60   10.80
   6   5   1   58.19    8.40
  -6   5  -1   39.40    8.50
  -6   5  -1   47.10    8.00
   6   5   1   59.99    8.40
   6   5   1   49.80    9.40
  -6   5  -1   43.70    8.80
   7  -5   1  529.55   23.70
  -7  -5  -1  548.25   27.20
   7  -5   1  572.44   25.10
  -7  -5  -1  542.65   22.30
  -7  -5  -1  599.64   27.90
  -7   5  -1  531.05   23.80
   7   5   1  578.14   24.40
  -7   5  -1  537.35   24.00
  -7   5  -1  516.45   24.10
   7   5   1  545.45   27.50
   7   5   1  552.64   24.00
  -8  -5  -1   -0.70    7.30
   8  -5   1   10.10   11.10
  -8  -5  -1   -7.70   12.80
   8  -5   1   -1.20    9.20
  -8  -5  -1    1.70   13.40
  -8   5  -1   -2.50    8.10
   8   5   1    4.20   10.20
   8   5   1    2.10    9.80
  -8   5  -1   -9.80   19.40
   8   5   1    9.30    8.90
  -8   5  -1   12.10   11.10
  -9  -5  -1  210.98   25.70
  -9  -5  -1  124.79   16.30
   9  -5   1  176.78   19.20
  -9  -5  -1  152.38   20.40
   9  -5   1  172.28   21.30
  -9   5  -1  183.38   19.10
   9   5   1  197.18   19.50
   9   5   1  183.28   21.00
   9   5   1  200.38   18.80
  -9   5  -1  180.28   20.10
  -9   5  -1  176.58   22.10
  10  -5   1   45.50   14.90
  10  -5   1   53.29   17.20
 -10  -5  -1   85.79   21.90
 -10  -5  -1   46.30   11.70
 -10  -5  -1   94.79   19.80
  10   5   1   88.59   14.80
  10   5   1   77.99   15.30
 -10   5  -1   39.10   16.90
 -10   5  -1   63.89   16.30
  10   5   1   73.69   15.50
 -10   5  -1   53.39   13.10
  11  -5   1   49.30   19.90
  11  -5   1   86.89   17.00
 -11  -5  -1   82.69   23.40
 -11  -5  -1   75.49   24.10
 -11  -5  -1   94.89   13.80
 -11   5  -1   32.20   20.10
 -11   5  -1   87.09   20.10
 -11   5  -1   57.99   14.10
  11   5   1   58.19   18.00
  11   5   1   50.19   16.50
  11   5   1   66.09   16.60
  12  -5   1   18.10   21.80
 -12  -5  -1    7.30   27.70
 -12  -5  -1   -8.60   20.50
 -12  -5  -1  -32.70   28.00
  12  -5   1  -18.80   17.00
 -12   5  -1   19.50   14.00
  12   5   1   10.30   17.00
 -12   5  -1   -0.30   21.90
 -12   5  -1   17.50   20.20
  12   5   1  -12.10   19.90
 -12   5  -1  -12.80   23.40
  12   5   1  -22.50   18.20
 -13  -5  -1    5.70   32.00
 -13  -5  -1  -14.10   17.40
 -13  -5  -1   23.70   35.00
  13  -5   1    0.70   21.60
  13  -5   1   33.90   29.40
 -13   5  -1    0.70   24.30
 -13   5  -1   19.50   19.10
  13   5   1    5.80   22.20
  13   5   1   25.70   26.90
  13   5   1   20.30   20.50
 -13   5  -1    1.60   27.40
 -13   5  -1  -27.70   29.20
  14  -5   1   20.70   31.20
  14  -5   1  -23.60   27.20
 -14  -5  -1   13.10   22.10
 -14  -5  -1   55.79   38.40
 -14   5  -1  -17.70   19.40
 -14   5  -1   18.20   31.50
 -14   5  -1   28.30   38.30
  14   5   1   -2.40   25.50
 -14   5  -1  -41.10   37.00
  14   5   1   38.10   31.20
  14   5   1   23.10   26.50
  14  -6  -1    4.40   32.90
  14  -6  -1   10.80   29.60
 -14   6   1  -14.30   36.30
 -14   6   1   -8.80   31.60
  14   6  -1  -14.10   26.10
 -14   6   1   -8.20   19.80
 -14   6   1  -18.10   35.00
  14   6  -1  -27.60   26.30
  13  -6  -1   14.70   23.60
 -13  -6   1   35.60   18.90
  13  -6  -1   69.99   29.40
 -13  -6   1  -27.90   31.00
 -13  -6   1   68.59   37.50
 -13   6   1   13.80   30.00
 -13   6   1   19.60   29.80
  13   6  -1  -10.30   25.90
 -13   6   1   31.70   17.70
  13   6  -1  -22.90   23.00
  13   6  -1   54.39   22.50
 -12  -6   1   15.90   29.50
 -12  -6   1   52.79   16.30
  12  -6  -1   62.79   24.70
 -12  -6   1    5.40   25.60
  12  -6  -1   26.70   19.80
 -12   6   1   50.39   23.60
  12   6  -1   47.20   18.30
 -12   6   1   41.40   23.80
 -12   6   1   56.49   15.60
  12   6  -1   46.20   19.90
  12   6  -1   10.20   20.20
  11  -6  -1   20.90   16.60
 -11  -6   1   -6.30   12.60
 -11  -6   1   24.90   21.70
  11  -6  -1   19.30   19.80
 -11  -6   1   -3.80   24.10
  11   6  -1   54.49   31.70
 -11   6   1   44.10   18.80
  11   6  -1   20.30   15.00
  11   6  -1   26.40   16.50
 -11   6   1   22.90   19.40
 -11   6   1   37.00   13.70
  10  -6  -1   45.20   17.60
 -10  -6   1   51.59   20.60
 -10  -6   1   34.10   11.70
  10  -6  -1   73.49   15.80
 -10  -6   1   65.09   19.30
 -10   6   1   65.59   16.80
 -10   6   1   76.99   13.20
  10   6  -1   58.99   14.10
  10   6  -1   62.79   14.70
 -10   6   1   49.50   17.10
  10   6  -1   54.19   14.60
  -9  -6   1   27.00   17.40
   9  -6  -1   16.90   12.30
   9  -6  -1  -12.80   13.60
  -9  -6   1   18.50    9.40
  -9  -6   1  -20.60   14.60
  -9   6   1    0.90   13.50
   9   6  -1    8.90   11.80
   9   6  -1    7.20   11.70
   9   6  -1   -2.40   11.00
  -9   6   1  -19.30   12.40
  -9   6   1    5.80    9.80
  -8  -6   1  105.99   15.80
   8  -6  -1   95.89   13.30
   8  -6  -1   71.59   14.10
  -8  -6   1   92.59   11.30
  -8  -6   1  104.39   18.30
   8   6  -1  120.99   14.30
   8   6  -1  131.29   16.10
  -8   6   1  115.29   12.30
   8   6  -1  104.49   12.30
  -8   6   1  103.19   14.60
   7  -6  -1  203.18   16.60
  -7  -6   1  250.07   19.40
   7  -6  -1  219.28   18.60
  -7  -6   1  217.38   21.00
   7  -6  -1  213.78   21.90
  -7  -6   1  234.58   14.80
   7   6  -1  241.58   17.10
   7   6  -1  249.28   16.30
   7   6  -1  242.98   17.30
  -7   6   1  214.98   17.50
  -7   6   1  224.58   17.10
  -7   6   1  229.28   15.90
   6  -6  -1  106.19   12.10
   6  -6  -1  100.89   13.50
   6  -6  -1  121.89   12.90
  -6  -6   1  131.99   14.50
  -6  -6   1  117.19   11.20
  -6   6   1  134.59   12.00
   6   6  -1  121.59   13.20
   6   6  -1  136.79   13.10
  -6   6   1  125.79   13.90
   6   6  -1  110.99   12.10
  -6   6   1  113.59   12.50
   5  -6  -1   21.30    9.60
   5  -6  -1   55.09    7.80
   5  -6  -1   42.90    8.50
  -5  -6   1   39.00    9.90
  -5  -6   1   42.30    6.60
  -5   6   1   42.80    8.50
  -5   6   1   47.30    7.60
   5   6  -1   42.30    7.80
   5   6  -1   50.79    7.70
   5   6  -1   55.49    7.80
  -5   6   1   53.59    7.60
   4  -6  -1   25.00    5.70
  -4  -6   1   21.10    5.30
   4  -6  -1   25.70    7.40
  -4  -6   1   16.70    7.40
   4  -6  -1    4.40    7.60
   4   6  -1   15.40    6.70
  -4   6   1   23.90    5.90
  -4   6   1   25.40    6.50
   4   6  -1   31.10    6.10
   4   6  -1   23.50    6.10
  -4   6   1   22.20    7.40
   3  -6  -1  106.39    8.60
  -3  -6   1   89.99    8.00
   3  -6  -1  105.49   10.40
   3  -6  -1   88.29    9.30
  -3  -6   1   94.59    9.60
  -3   6   1  112.09   11.50
   3   6  -1   75.09    9.40
  -3   6   1   92.99    8.40
   3   6  -1  109.69    8.40
   3   6  -1   84.49    8.80
  -3   6   1   89.09    9.00
  -2  -6   1   22.40    4.20
   2  -6  -1   16.80    5.90
  -2  -6   1    6.60    7.70
   2  -6  -1   15.30    5.80
   2  -6  -1   13.60    4.60
  -2   6   1   15.00    6.40
   2   6  -1   21.80    4.50
   2   6  -1   22.40    4.50
  -2   6   1   18.40    4.70
   2   6  -1   21.40    5.60
  -2   6   1   20.80    4.90
   1  -6  -1 2206.38   65.99
  -1  -6   1 2298.97   64.99
   1  -6  -1 2261.17   63.79
   1  -6  -1 2188.38   67.09
   1  -6  -1 2083.59   65.49
  -1   6   1 2134.29   65.09
   1   6  -1 2280.67   64.79
  -1   6   1 2156.58   65.39
  -1   6   1 2257.07   63.79
  -1   6   1 2183.58   67.19
   1   6  -1 2215.28   64.59
   1   6  -1 2128.39   66.99
   0  -6   1  801.52   24.10
   0  -6  -1  757.12   26.80
   0  -6   1  749.62   26.40
   0  -6  -1  783.72   23.90
   0  -6  -1  763.82   25.10
   0   6   1  825.62   24.00
   0   6   1  687.03   25.10
   0   6  -1  795.32   23.90
   0   6  -1  753.92   25.00
   0   6   1  737.13   27.00
   0   6   1  697.13   25.10
   0   6   1  779.32   24.50
   0   6  -1  725.03   26.60
  -1  -6  -1  451.25   15.70
  -1  -6  -1  424.66   15.70
   1  -6   1  445.96   17.70
  -1  -6  -1  441.56   17.30
   1   6   1  454.05   15.00
   1   6   1  468.75   15.80
  -1   6  -1  446.46   18.20
   1   6   1  404.26   16.50
  -1   6  -1  409.66   16.80
  -1   6  -1  426.86   14.50
   1   6   1  442.46   18.80
  -2  -6  -1  437.86   18.00
   2  -6   1  423.16   15.70
   2  -6   1  439.66   18.20
  -2  -6  -1  463.05   16.30
   2   6   1  440.36   19.30
   2   6   1  443.86   17.10
  -2   6  -1  468.55   15.30
  -2   6  -1  456.15   17.80
  -2   6  -1  412.96   18.40
   2   6   1  469.95   16.60
  -3  -6  -1  263.17   11.90
   3  -6   1  242.68   11.40
   3  -6   1  251.97   13.80
  -3  -6  -1  241.28   13.90
  -3   6  -1  260.97   11.30
  -3   6  -1  240.88   14.10
   3   6   1  255.37   13.10
  -3   6  -1  253.27   13.60
   3   6   1  256.17   13.90
   3   6   1  269.37   12.50
   4  -6   1    1.90    5.00
   4  -6   1    4.10    6.20
  -4  -6  -1    5.00    4.90
   4   6   1    2.90    5.60
   4   6   1    4.50    6.40
  -4   6  -1    2.10    6.00
  -4   6  -1    5.00    5.20
  -4   6  -1   -1.80    6.60
   4   6   1    5.20    5.60
  -5  -6  -1  232.78   13.00
   5  -6   1  236.48   15.10
   5  -6   1  259.97   13.70
  -5   6  -1  228.88   13.80
   5   6   1  251.77   14.90
   5   6   1  244.38   14.80
   5   6   1  258.27   14.00
  -5   6  -1  250.07   14.70
  -5   6  -1  240.58   14.80
  -6  -6  -1   -8.00    5.10
   6  -6   1    1.80    6.70
  -6  -6  -1   -7.30    9.30
   6  -6   1   -6.80    7.80
   6   6   1   11.40    7.10
  -6   6  -1   -4.00    7.70
   6   6   1    2.40    6.90
  -6   6  -1   12.60    7.50
  -6   6  -1   -0.60    6.80
   6   6   1    6.40    8.30
   7  -6   1  167.38   17.40
  -7  -6  -1  210.98   20.90
   7  -6   1  200.68   15.90
  -7  -6  -1  221.88   14.30
   7   6   1  228.58   16.70
   7   6   1  211.78   16.20
   7   6   1  205.38   17.70
  -7   6  -1  199.38   16.80
  -7   6  -1  220.68   16.50
  -7   6  -1  212.78   16.70
   8  -6   1   23.40   10.50
  -8  -6  -1   -1.80   14.70
   8  -6   1    2.40   11.50
  -8  -6  -1   30.80    8.70
  -8  -6  -1   13.90   13.80
  -8   6  -1   26.10   11.30
   8   6   1   18.00   10.60
   8   6   1   15.80   10.80
  -8   6  -1   13.00   11.60
  -8   6  -1   24.60   10.20
   8   6   1   13.60   10.20
   9  -6   1   18.30   14.50
  -9  -6  -1    4.50   17.60
  -9  -6  -1    9.90    9.10
  -9  -6  -1   -8.00   17.00
   9  -6   1   -1.70   11.80
   9   6   1   15.70   11.70
  -9   6  -1   23.70   11.30
   9   6   1   20.50   12.40
  -9   6  -1  -13.00   12.80
  -9   6  -1   35.70   14.50
   9   6   1   10.40   11.60
 -10  -6  -1    8.00   19.70
  10  -6   1   21.80   13.90
 -10  -6  -1    4.50   20.30
  10  -6   1   11.30   16.90
 -10  -6  -1   -1.90   11.10
 -10   6  -1   11.20   12.50
  10   6   1   10.40   13.30
 -10   6  -1   38.60   16.40
  10   6   1   36.60   14.10
  10   6   1   -0.10   14.80
 -10   6  -1    7.90   16.10
 -11  -6  -1   11.70   24.70
  11  -6   1   -6.50   15.90
 -11  -6  -1   22.60   13.10
  11  -6   1   17.60   19.50
 -11  -6  -1   16.40   23.10
  11   6   1   -2.30   15.90
  11   6   1   -4.80   17.70
 -11   6  -1   15.80   20.50
 -11   6  -1   11.10   13.70
 -11   6  -1   19.00   18.70
  11   6   1   -4.10   14.90
 -12  -6  -1  163.58   31.50
 -12  -6  -1  138.79   18.90
 -12  -6  -1  104.59   32.50
  12  -6   1  240.58   26.40
 -12   6  -1  164.78   23.90
  12   6   1  147.59   21.40
 -12   6  -1  150.38   26.40
  12   6   1  126.09   24.30
  12   6   1  171.18   22.60
 -12   6  -1  207.78   25.90
 -12   6  -1  199.08   25.40
  13  -6   1   -2.30   23.90
 -13  -6  -1   66.19   39.40
 -13  -6  -1   16.40   17.90
 -13  -6  -1   41.90   33.60
  13  -6   1   20.00   26.80
  13   6   1   -1.70   27.90
 -13   6  -1    3.60   30.60
  13   6   1   12.30   23.70
  13   6   1   21.90   22.60
 -13   6  -1   23.10   27.10
 -13   6  -1   27.30   28.90
 -13   6  -1   23.50   17.70
 -14  -6  -1   40.60   23.40
  14  -6   1  108.09   33.20
  14  -6   1   42.20   28.80
 -14   6  -1   59.19   38.20
  14   6   1  -21.70   27.10
 -14   6  -1  115.49   37.50
 -14   6  -1   61.09   22.30
 -14   6  -1   38.70   32.80
  14   6   1   73.09   27.80
  14  -7  -1  -23.00   29.50
  14  -7  -1   16.90   35.60
 -14   7   1   42.60   59.59
  14   7  -1  -42.70   26.10
 -14   7   1  -31.00   21.60
  14   7  -1  -41.90   26.00
 -14   7   1   62.39   40.60
 -14   7   1   12.20   31.90
 -13  -7   1    7.10   19.90
  13  -7  -1   14.50   29.90
 -13  -7   1   75.19   34.70
  13  -7  -1   49.30   24.40
  13   7  -1   71.09   27.90
 -13   7   1   27.90   18.80
  13   7  -1   49.20   24.90
 -13   7   1  -37.50   29.60
  13   7  -1   55.89   22.30
 -13   7   1   30.10   31.80
 -12  -7   1   35.20   27.10
 -12  -7   1   14.20   16.50
  12  -7  -1   54.29   22.60
 -12  -7   1   35.60   31.60
 -12   7   1   53.39   24.20
  12   7  -1   31.10   18.70
  12   7  -1   -4.00   21.30
  12   7  -1   12.10   20.60
 -12   7   1   43.30   24.50
 -12   7   1   53.49   21.60
 -11  -7   1   84.19   24.20
 -11  -7   1   71.29   27.70
  11  -7  -1   36.80   21.10
  11  -7  -1   40.30   18.30
  11   7  -1   48.50   16.30
 -11   7   1   70.19   14.70
  11   7  -1   42.20   18.70
 -11   7   1   55.19   21.30
 -11   7   1   57.59   20.60
  11   7  -1   71.09   18.00
  10  -7  -1   45.20   15.30
 -10  -7   1   51.79   20.40
 -10  -7   1   61.59   13.00
  10  -7  -1   37.10   17.80
 -10  -7   1    5.30   21.20
 -10   7   1   28.50   16.40
  10   7  -1   47.80   15.40
  10   7  -1   59.89   15.30
 -10   7   1   47.60   12.00
  10   7  -1   22.20   15.00
 -10   7   1   25.70   17.60
  -9  -7   1  240.78   27.00
   9  -7  -1  251.77   25.90
  -9  -7   1  265.07   19.70
  -9  -7   1  246.48   31.40
   9  -7  -1  238.38   23.50
   9   7  -1  308.57   23.50
  -9   7   1  311.77   24.80
   9   7  -1  288.67   22.00
  -9   7   1  236.98   24.20
   9   7  -1  274.17   24.10
  -9   7   1  321.47   20.70
   8  -7  -1   52.49   11.30
  -8  -7   1   44.30    9.50
   8  -7  -1   48.90   14.10
  -8  -7   1   33.90   16.30
  -8  -7   1   37.20   13.80
   8   7  -1   37.10   10.70
   8   7  -1   37.00   11.60
   8   7  -1   57.99   12.50
  -8   7   1   47.10   12.80
  -8   7   1   50.79    9.80
  -8   7   1   44.90   13.10
   7  -7  -1   35.10   14.00
  -7  -7   1   21.30    7.80
  -7  -7   1   41.30   14.10
   7  -7  -1   26.40   11.00
   7  -7  -1   19.70    9.60
  -7   7   1   20.60   15.40
  -7   7   1   37.70    9.30
   7   7  -1   27.30    8.90
  -7   7   1   27.50   10.90
   7   7  -1   30.80    9.80
   7   7  -1   28.40    9.90
   6  -7  -1  118.39   13.00
  -6  -7   1  122.19   16.70
  -6  -7   1  143.89   11.90
   6  -7  -1  121.29   15.00
   6  -7  -1  114.59   12.70
   6   7  -1  123.39   15.90
   6   7  -1  116.19   13.80
  -6   7   1  122.69   13.30
  -6   7   1  127.39   12.70
  -6   7   1  118.79   15.20
   6   7  -1  127.19   12.80
  -5  -7   1    8.60    5.50
  -5  -7   1    9.40    8.40
   5  -7  -1   10.00    9.40
   5  -7  -1   10.80    7.80
   5  -7  -1   24.00    6.90
  -5   7   1    5.20    8.00
   5   7  -1    8.70    6.20
   5   7  -1   16.90    6.80
  -5   7   1    9.60    6.50
  -5   7   1   10.00    6.30
   5   7  -1   10.30    6.90
  -4  -7   1   -4.30    4.80
   4  -7  -1    0.30    8.00
   4  -7  -1    4.00    5.60
  -4  -7   1    1.20    7.70
   4  -7  -1   -0.20    6.90
   4   7  -1    1.90    5.70
  -4   7   1   -0.80    5.80
  -4   7   1    5.60    5.30
   4   7  -1    4.50    6.30
  -4   7   1    6.20    7.50
   4   7  -1   -8.20    5.40
  -3  -7   1  630.64   23.00
   3  -7  -1  647.24   23.70
   3  -7  -1  632.14   25.30
   3  -7  -1  673.33   25.70
  -3   7   1  635.14   23.80
  -3   7   1  666.33   25.60
   3   7  -1  689.73   22.50
   3   7  -1  621.74   24.90
   3   7  -1  654.63   23.30
  -3   7   1  655.83   22.80
   2  -7  -1   47.30    7.60
  -2  -7   1   34.90    5.30
   2  -7  -1   36.00    5.90
   2  -7  -1   38.40    7.90
  -2   7   1   38.70    7.80
  -2   7   1   39.00    6.10
   2   7  -1   42.90    6.00
  -2   7   1   45.40    5.80
   2   7  -1   52.79    5.50
   2   7  -1   40.50    4.60
   1  -7  -1  394.86   16.90
   1  -7  -1  422.26   14.00
  -1  -7   1  412.46   15.00
   1  -7  -1  388.16   17.90
   1   7  -1  378.36   14.90
  -1   7   1  398.16   14.00
  -1   7   1  398.06   18.50
   1   7  -1  376.16   18.20
   1   7  -1  413.56   15.30
  -1   7   1  402.86   15.70
  -1   7   1  371.26   15.50
   0  -7  -1   82.89   10.20
   0  -7  -1   82.49    6.60
   0  -7  -1   79.29    8.80
   0  -7   1   82.59    9.70
   0  -7   1   87.19    6.60
   0   7   1   73.89    6.90
   0   7   1   83.59    9.20
   0   7  -1   83.29   10.70
   0   7   1   64.79    6.90
   0   7   1   88.79    8.70
   0   7  -1   74.19    6.80
   0   7  -1   80.29    7.90
   0   7   1   82.79    9.30
  -1  -7  -1  540.15   19.50
   1  -7   1  552.24   18.20
   1  -7   1  557.94   21.70
  -1  -7  -1  539.85   19.00
   1   7   1  535.15   18.50
   1   7   1  529.55   20.10
  -1   7  -1  529.85   21.90
   1   7   1  558.14   22.60
  -1   7  -1  565.64   18.10
   1   7   1  563.94   19.20
  -1   7  -1  555.74   20.30
   2  -7   1 1153.28   39.40
   2  -7   1 1159.28   37.00
  -2  -7  -1 1159.78   38.90
  -2  -7  -1 1247.48   37.60
   2   7   1 1212.68   36.00
   2   7   1 1219.28   37.90
  -2   7  -1 1214.38   36.20
   2   7   1 1205.18   37.60
  -2   7  -1 1177.78   38.80
  -2   7  -1 1144.29   39.40
   2   7   1 1227.98   40.80
  -3  -7  -1  277.17   12.90
   3  -7   1  272.07   15.20
   3  -7   1  260.67   12.20
  -3  -7  -1  256.17   15.90
   3   7   1  254.47   13.80
  -3   7  -1  271.77   14.50
   3   7   1  254.47   13.30
  -3   7  -1  260.87   15.50
   3   7   1  262.67   15.40
  -3   7  -1  264.47   11.80
  -4  -7  -1  656.13   27.30
   4  -7   1  693.73   27.10
  -4  -7  -1  727.33   25.50
   4  -7   1  685.53   25.00
   4   7   1  743.73   25.90
  -4   7  -1  732.03   24.90
  -4   7  -1  733.33   27.10
   4   7   1  717.43   27.50
   4   7   1  727.23   26.20
  -4   7  -1  752.02   27.20
   5  -7   1   41.00    6.90
  -5  -7  -1   26.50    6.20
   5  -7   1   30.70    8.80
  -5   7  -1   36.40    7.90
  -5   7  -1   25.20    8.30
   5   7   1   33.10    7.70
   5   7   1   35.00    7.70
  -5   7  -1   32.90    7.00
   5   7   1   32.20    8.30
   6  -7   1   62.19   10.70
  -6  -7  -1   39.30   14.60
  -6  -7  -1   82.59    8.70
   6  -7   1   72.99    9.50
  -6   7  -1   66.19   10.30
  -6   7  -1   70.09    9.70
   6   7   1   66.59   10.00
   6   7   1   71.99   10.30
  -6   7  -1   65.39    9.20
  -7  -7  -1   50.89    8.80
   7  -7   1   42.90    9.80
  -7  -7  -1   36.40   13.10
   7  -7   1   50.49   11.20
   7   7   1   56.09   11.40
  -7   7  -1   60.99   10.70
  -7   7  -1   60.59   11.40
   7   7   1   57.39   11.40
  -7   7  -1   56.69   10.30
   7   7   1   59.29   10.40
   8  -7   1  102.59   13.30
   8  -7   1  108.49   15.50
  -8  -7  -1   96.89   11.50
  -8  -7  -1  136.29   17.80
  -8   7  -1  127.99   13.70
   8   7   1  114.09   15.60
   8   7   1  108.99   13.70
   8   7   1  132.89   17.20
  -8   7  -1  118.09   14.60
  -8   7  -1  117.09   13.90
   9  -7   1   95.39   15.00
  -9  -7  -1  106.29   19.70
   9  -7   1  130.89   18.20
  -9  -7  -1  127.39   13.60
  -9   7  -1  141.69   15.20
  -9   7  -1  113.19   17.00
   9   7   1  131.29   16.60
   9   7   1  129.59   15.90
   9   7   1  113.79   15.50
  -9   7  -1  144.59   17.00
 -10  -7  -1   -0.90   20.10
  10  -7   1   23.00   14.20
 -10  -7  -1   -1.60   22.20
  10  -7   1   33.00   18.40
 -10  -7  -1  -11.20   11.10
 -10   7  -1    9.00   16.40
  10   7   1   26.40   14.40
  10   7   1    9.00   15.70
 -10   7  -1    8.50   12.30
 -10   7  -1   30.60   17.00
  10   7   1    7.00   14.20
  11  -7   1  139.99   22.40
  11  -7   1  148.59   20.50
 -11  -7  -1  119.69   27.10
 -11  -7  -1  171.38   23.30
 -11  -7  -1  116.09   29.70
  11   7   1  144.59   33.30
 -11   7  -1  126.69   22.50
 -11   7  -1  129.69   22.00
  11   7   1  157.48   20.10
  11   7   1  125.79   20.70
 -11   7  -1  108.69   16.40
  12  -7   1    5.90   19.80
 -12  -7  -1   52.49   28.50
 -12  -7  -1   -9.00   16.10
  12  -7   1   20.10   23.40
 -12  -7  -1   69.39   33.00
  12   7   1    4.80   21.00
 -12   7  -1   14.50   22.90
 -12   7  -1  -21.10   23.70
  12   7   1  -17.80   23.70
 -12   7  -1  -12.90   17.10
  12   7   1   -1.00   18.90
 -12   7  -1  -12.00   24.30
  13  -7   1   14.80   23.50
 -13  -7  -1  -72.09   34.50
  13  -7   1  -10.00   29.20
 -13  -7  -1   -0.10   20.20
  13   7   1    8.40   22.30
 -13   7  -1   11.90   30.30
 -13   7  -1  -15.20   27.50
 -13   7  -1   13.70   31.50
  13   7   1  -28.00   27.10
  13   7   1  -21.20   24.30
 -13   7  -1  -11.50   19.50
  14  -7   1   24.20   34.80
  14  -7   1  -23.00   29.20
 -14  -7  -1   -4.90   23.60
  14   7   1  -16.60   26.30
 -14   7  -1  -72.39   36.50
  14   7   1   -1.70   28.60
 -14   7  -1  -24.10   23.20
 -14   7  -1   18.70   37.10
  14  -8  -1   41.70   33.50
  14  -8  -1  -17.20   35.80
  14   8  -1    7.70   26.30
  14   8  -1   16.90   27.80
 -14   8   1   18.10   22.80
 -13  -8   1   22.30   34.10
 -13  -8   1   12.40   20.90
  13  -8  -1  -26.80   26.60
  13  -8  -1   47.50   31.40
 -13   8   1  -16.20   20.20
 -13   8   1  -22.80   31.90
  13   8  -1   10.40   23.10
  13   8  -1   25.00   26.00
 -13   8   1   -4.50   30.20
 -12  -8   1   90.79   19.60
  12  -8  -1   50.39   26.10
 -12  -8   1  145.39   31.30
 -12  -8   1   38.80   34.00
  12  -8  -1   69.49   22.60
 -12   8   1   76.29   26.20
 -12   8   1   79.19   27.00
  12   8  -1   80.39   20.80
  12   8  -1   96.29   23.80
  12   8  -1  108.89   22.60
 -12   8   1  107.99   18.60
 -11  -8   1   48.70   25.30
  11  -8  -1   21.20   22.50
 -11  -8   1   -1.00   29.40
 -11  -8   1    9.10   14.20
  11  -8  -1   40.00   21.70
  11   8  -1  -19.40   16.40
 -11   8   1  -12.60   21.30
 -11   8   1   24.20   22.80
  11   8  -1   25.90   18.80
  11   8  -1    7.80   16.90
 -11   8   1   38.70   20.70
  10  -8  -1    1.10   14.40
 -10  -8   1  -11.10   23.70
  10  -8  -1  -10.80   18.70
 -10  -8   1   17.10   21.30
 -10  -8   1    7.00   12.10
  10   8  -1   12.50   14.80
 -10   8   1   -1.60   15.80
  10   8  -1  -18.50   14.00
 -10   8   1    5.20   12.10
 -10   8   1   19.60   17.60
  10   8  -1   11.00   17.50
  -9  -8   1   89.79   21.90
  -9  -8   1   92.89   13.30
   9  -8  -1   78.39   15.50
   9  -8  -1  105.39   17.90
  -9  -8   1   66.49   19.60
   9   8  -1   82.99   15.70
   9   8  -1   83.49   14.80
  -9   8   1  132.29   13.90
  -9   8   1   58.19   16.00
  -9   8   1  113.89   17.40
   9   8  -1   87.09   14.90
   8  -8  -1   -4.40   11.00
  -8  -8   1   -0.90    8.50
   8  -8  -1   18.60   13.80
   8   8  -1    4.50   10.30
  -8   8   1   10.90   12.20
   8   8  -1   -4.20   10.80
  -8   8   1    6.30    9.60
   8   8  -1   -0.80   11.80
  -8   8   1   19.70   13.10
   7  -8  -1   52.09   13.40
  -7  -8   1   34.80    9.00
  -7  -8   1    5.20   10.50
   7  -8  -1   52.39   10.80
   7  -8  -1   45.50   15.40
   7   8  -1   31.90   10.90
  -7   8   1   47.70    9.70
  -7   8   1   48.20   11.20
   7   8  -1   48.10   10.40
   7   8  -1   46.30   10.40
   6  -8  -1   77.09   14.50
   6  -8  -1   73.79   12.40
   6  -8  -1   77.89   10.80
  -6  -8   1   67.89   12.10
  -6  -8   1   79.29    9.30
   6   8  -1   73.89   10.00
  -6   8   1   82.79   10.70
   6   8  -1   74.19   10.90
  -6   8   1   78.79   11.70
   6   8  -1   92.39   11.00
  -5  -8   1   94.09   10.80
  -5  -8   1   99.79   12.00
   5  -8  -1  113.99   13.90
   5  -8  -1  106.99   12.40
   5  -8  -1   90.59   11.80
  -5   8   1  108.09   12.00
  -5   8   1   95.29   11.70
   5   8  -1  123.99   12.30
   5   8  -1   93.99   11.40
   5   8  -1  101.49   11.50
  -5   8   1  102.49   11.40
   4  -8  -1  -10.40    5.40
  -4  -8   1    2.60    5.40
   4  -8  -1   -2.00    8.40
  -4  -8   1   10.60   12.00
   4  -8  -1   -0.80    7.50
  -4   8   1   17.00    6.00
  -4   8   1   -3.30    8.40
   4   8  -1   13.00    6.10
   4   8  -1   -0.60    6.20
  -4   8   1    1.70    5.60
   4   8  -1    1.00    6.50
   3  -8  -1  274.17   17.50
   3  -8  -1  323.57   17.30
   3  -8  -1  311.07   15.00
  -3  -8   1  296.57   14.40
  -3  -8   1  275.47   15.00
   3   8  -1  323.97   15.00
   3   8  -1  335.67   13.70
  -3   8   1  290.47   14.00
  -3   8   1  295.87   15.20
   3   8  -1  335.47   17.10
  -3   8   1  283.57   17.40
   2  -8  -1  120.99   10.00
   2  -8  -1  121.29   12.60
   2  -8  -1  112.39   12.70
  -2  -8   1  104.59    9.10
   2   8  -1   97.89    8.10
   2   8  -1  119.89   13.70
  -2   8   1  122.59    9.40
   2   8  -1   97.19    8.90
  -2   8   1  117.79   14.20
  -2   8   1  109.99   10.10
   2   8  -1  118.29    9.90
   1  -8  -1  242.08   10.10
   1  -8  -1  211.38   14.00
  -1  -8   1  222.88   11.30
   1  -8  -1  224.18   15.00
   1   8  -1  206.38   11.10
  -1   8   1  233.78   12.20
   1   8  -1  237.88   15.70
  -1   8   1  244.28   12.10
  -1   8   1  235.48   10.50
  -1   8   1  228.68   16.00
   1   8  -1  232.08   11.90
   0  -8  -1   15.70    4.10
   0  -8   1    8.60    4.00
   0  -8  -1   16.70    6.20
   0  -8  -1   10.70    6.60
   0  -8   1    5.90    6.40
   0   8   1    3.90    5.90
   0   8  -1    2.10    7.60
   0   8   1    6.60    4.20
   0   8   1    5.90    5.70
   0   8  -1    3.80    4.80
   0   8   1    9.50    4.30
   0   8  -1   11.20    4.50
   0   8   1   13.30    7.50
  -1  -8  -1   48.00    6.90
   1  -8   1   55.29    8.40
  -1  -8  -1   56.09    6.00
   1  -8   1   58.69    5.50
  -1  -8  -1   58.69    7.80
  -1   8  -1   64.49    7.60
   1   8   1   61.49    6.60
   1   8   1   58.89    5.90
   1   8   1   48.00    9.10
   1   8   1   57.39    7.70
  -1   8  -1   55.09    8.90
  -1   8  -1   60.29    5.70
  -2  -8  -1  325.77   14.00
   2  -8   1  289.37   16.50
  -2  -8  -1  312.37   18.00
   2  -8   1  275.87   13.20
   2   8   1  290.67   14.10
   2   8   1  287.07   17.80
  -2   8  -1  302.17   12.20
   2   8   1  334.67   12.20
  -2   8  -1  291.67   15.30
   2   8   1  297.37   14.70
  -2   8  -1  311.07   17.30
   3  -8   1  689.83   24.50
  -3  -8  -1  699.33   24.90
  -3  -8  -1  699.13   27.50
   3  -8   1  693.43   27.50
   3   8   1  706.03   25.50
   3   8   1  705.53   25.20
   3   8   1  717.13   28.00
  -3   8  -1  694.73   27.60
   3   8   1  728.13   29.10
  -3   8  -1  723.03   23.70
  -3   8  -1  689.83   26.40
   4  -8   1   38.90    8.20
   4  -8   1   33.80    6.30
  -4  -8  -1   36.20    6.30
  -4  -8  -1   33.70    9.90
   4   8   1   46.90    7.40
  -4   8  -1   35.40    7.90
   4   8   1   36.40    8.20
  -4   8  -1   35.50    9.10
  -4   8  -1   37.20    6.40
   4   8   1   20.10    7.60
   5  -8   1  139.29   15.20
  -5  -8  -1  157.88   11.90
  -5  -8  -1  155.58   16.60
   5  -8   1  170.68   12.40
   5   8   1  154.18   14.10
   5   8   1  159.88   13.50
   5   8   1  161.88   14.20
  -5   8  -1  167.08   13.90
  -5   8  -1  140.59   15.80
  -5   8  -1  163.08   12.50
   6  -8   1   51.09   11.30
  -6  -8  -1   36.60    7.50
   6  -8   1   36.80    9.00
   6   8   1   28.10    9.30
   6   8   1   63.19   10.80
   6   8   1   50.89   10.00
  -6   8  -1   32.10   10.30
  -6   8  -1   34.30    9.00
  -6   8  -1   43.80    9.50
   7  -8   1   57.19   10.50
   7  -8   1   55.39   13.00
  -7  -8  -1   47.90    9.50
  -7  -8  -1   58.59   16.60
   7   8   1   45.10   11.10
  -7   8  -1   60.59   12.00
  -7   8  -1   43.90   11.30
   7   8   1   49.20   11.30
  -7   8  -1   47.30   10.50
   7   8   1   36.50   10.40
   8  -8   1  133.99   16.90
   8  -8   1  121.89   14.50
  -8  -8  -1  120.19   18.50
  -8  -8  -1  103.69   12.30
  -8   8  -1   90.29   24.20
   8   8   1  119.89   15.10
   8   8   1  109.79   15.50
   8   8   1  112.29   14.50
  -8   8  -1  164.08   18.40
  -8   8  -1  158.48   19.20
  -9  -8  -1   67.49   20.00
  -9  -8  -1   41.60   10.90
   9  -8   1   69.19   17.60
   9  -8   1   50.49   14.20
   9   8   1   58.19   14.40
  -9   8  -1   60.19   13.00
  -9   8  -1   52.59   15.70
   9   8   1   39.20   13.60
  -9   8  -1   82.09   16.70
   9   8   1   80.29   18.20
 -10  -8  -1   25.60   22.80
  10  -8   1  -13.80   19.20
 -10  -8  -1    8.60   12.50
  10  -8   1    7.20   14.60
 -10   8  -1   26.60   16.70
  10   8   1   -3.90   14.30
 -10   8  -1    0.00   13.10
  10   8   1   23.70   16.60
  10   8   1  -13.90   14.90
 -10   8  -1   -7.50   17.00
 -11  -8  -1   52.99   15.40
  11  -8   1   95.39   22.30
 -11  -8  -1   60.39   26.80
  11  -8   1   40.30   20.10
 -11   8  -1   67.59   31.30
 -11   8  -1   59.39   21.70
  11   8   1   48.70   21.50
  11   8   1   43.60   18.20
  11   8   1   73.69   18.80
 -11   8  -1   39.30   21.70
 -12  -8  -1  -26.80   16.80
  12  -8   1  -28.00   21.80
  12  -8   1    2.70   25.50
 -12  -8  -1   54.39   30.20
 -12   8  -1   -3.20   24.90
  12   8   1    3.10   24.20
  12   8   1   21.60   19.70
  12   8   1   -4.80   22.10
 -12   8  -1   32.70   26.80
 -12   8  -1   24.40   17.70
 -13  -8  -1   44.60   37.00
  13  -8   1  -15.00   29.90
  13  -8   1  -17.60   25.90
 -13  -8  -1   16.30   20.40
 -13   8  -1   30.90   28.60
 -13   8  -1   43.50   31.60
  13   8   1   36.90   24.00
 -13   8  -1   69.79   31.20
  13   8   1   29.80   25.80
 -13   8  -1   33.60   22.50
 -14  -8  -1   53.09   25.80
  14  -8   1   -7.20   37.80
  14  -8   1  -73.49   30.30
 -14   8  -1  -15.20   39.40
  14   8   1    8.50   30.50
  14   8   1  -23.40   25.60
 -14   8  -1  -19.70   23.10
  14  -9  -1   33.80   39.70
  14  -9  -1  -79.69   31.80
 -14   9   1   -4.70   23.80
  14   9  -1  -48.70   28.30
 -13  -9   1  -19.80   50.89
 -13  -9   1    0.30   20.90
  13  -9  -1   53.89   33.40
  13  -9  -1   44.60   28.90
 -13   9   1  -16.90   33.20
  13   9  -1  -63.79   22.30
  13   9  -1  -29.10   26.30
 -13   9   1   -9.30   21.20
 -12  -9   1   12.90   31.60
 -12  -9   1   61.39   19.80
  12  -9  -1   64.79   25.50
  12  -9  -1   -4.20   27.10
 -12   9   1   -9.00   25.90
  12   9  -1   42.90   20.80
 -12   9   1  -20.10   27.40
  12   9  -1   59.89   23.90
 -12   9   1   34.70   18.10
  12   9  -1   -1.90   22.90
  11  -9  -1   60.89   21.10
 -11  -9   1   53.39   16.40
  11  -9  -1   71.69   25.10
 -11  -9   1   29.80   26.00
 -11   9   1   66.19   22.40
  11   9  -1   34.10   26.50
 -11   9   1   49.50   16.50
  11   9  -1   66.49   19.80
 -11   9   1    5.80   21.80
  11   9  -1   22.90   20.10
  10  -9  -1   23.00   20.80
 -10  -9   1   24.30   14.60
 -10  -9   1   18.50   22.10
  10  -9  -1   57.49   17.80
 -10   9   1   42.70   19.00
 -10   9   1   41.60   13.50
  10   9  -1   26.00   16.90
  10   9  -1   24.10   15.80
 -10   9   1   33.00   17.60
  10   9  -1   53.59   17.00
  -9  -9   1   23.40   11.10
   9  -9  -1   23.60   14.60
   9  -9  -1   55.79   18.20
   9   9  -1   35.90   14.60
   9   9  -1   12.30   14.10
   9   9  -1   28.80   13.50
  -9   9   1   24.50   14.80
  -9   9   1   27.20   16.50
  -9   9   1   46.40   12.00
  -8  -9   1   12.50    8.90
   8  -9  -1    6.90   11.30
   8  -9  -1  -10.50   14.40
  -8  -9   1   -9.70   13.50
  -8   9   1    3.20   13.30
   8   9  -1   11.80   11.30
  -8   9   1  -15.20    9.10
   8   9  -1   -3.70   11.70
   8   9  -1    3.10   10.90
  -8   9   1  -14.00   12.60
  -7  -9   1  155.68   15.20
   7  -9  -1  183.98   21.30
   7  -9  -1  175.98   17.60
  -7  -9   1  141.09   17.40
  -7   9   1  131.99   16.40
   7   9  -1  159.58   17.50
  -7   9   1  143.39   17.80
  -7   9   1  140.99   16.40
   7   9  -1  155.38   17.50
   7   9  -1  150.88   17.90
  -6  -9   1  116.99   13.10
   6  -9  -1   91.39   12.10
   6  -9  -1   88.99   16.00
   6  -9  -1   86.99   13.40
  -6  -9   1  111.89   14.50
  -6   9   1  115.19   14.20
  -6   9   1   97.79   13.50
   6   9  -1  114.59   11.60
  -6   9   1  119.59   12.10
   6   9  -1  120.49   14.00
   6   9  -1  127.09   15.60
  -5  -9   1  167.18   16.60
  -5  -9   1  164.28   13.20
   5  -9  -1  204.78   14.60
   5  -9  -1  135.89   16.40
   5  -9  -1  177.28   20.00
  -5   9   1  186.08   18.10
   5   9  -1  164.28   13.30
   5   9  -1  175.88   13.80
   5   9  -1  171.48   15.30
  -5   9   1  169.68   14.30
  -4  -9   1  363.56   18.60
   4  -9  -1  341.97   20.50
   4  -9  -1  406.76   22.70
   4  -9  -1  415.86   18.60
  -4  -9   1  355.06   17.20
  -4   9   1  358.06   21.10
  -4   9   1  369.06   17.20
   4   9  -1  397.16   17.90
   4   9  -1  392.16   19.70
  -4   9   1  391.36   18.40
   4   9  -1  380.46   16.80
   3  -9  -1   41.70    9.40
   3  -9  -1   42.30    9.70
  -3  -9   1   44.90    7.00
   3  -9  -1   37.50    7.90
  -3  -9   1   42.90    7.60
   3   9  -1   60.29    7.10
  -3   9   1   48.90   10.50
   3   9  -1   41.30    8.80
   3   9  -1   39.00    9.90
  -3   9   1   38.40    7.60
   3   9  -1   40.20    6.90
  -3   9   1   34.30    6.50
  -2  -9   1  649.04   22.60
   2  -9  -1  630.14   25.60
   2  -9  -1  625.54   26.10
   2  -9  -1  593.64   23.40
  -2   9   1  613.84   26.70
   2   9  -1  632.94   21.40
  -2   9   1  604.34   23.40
   2   9  -1  620.64   27.10
   2   9  -1  600.94   22.60
  -2   9   1  607.94   22.30
   1  -9  -1  403.06   14.80
   1  -9  -1  379.46   18.80
   1  -9  -1  372.96   19.60
  -1  -9   1  405.56   16.00
   1   9  -1  407.86   15.90
  -1   9   1  383.66   21.10
   1   9  -1  381.56   20.80
  -1   9   1  386.46   16.60
  -1   9   1  404.96   15.20
   1   9  -1  400.26   16.40
  -1   9   1  368.66   16.60
  -1   9   1  371.66   18.30
   0  -9  -1   60.39    9.80
   0  -9   1   60.99    6.30
   0  -9  -1   61.69    7.30
   0  -9   1   42.40    8.50
   0  -9  -1   68.99    8.90
   0   9   1   49.10    8.10
   0   9  -1   68.09    6.70
   0   9   1   61.99    6.70
   0   9  -1   64.69   10.50
   0   9   1   72.59   10.80
   0   9   1   46.90    7.20
   0   9  -1   54.19    7.00
   0   9   1   60.79    6.50
  -1  -9  -1  176.18   10.20
  -1  -9  -1  176.28   12.50
   1  -9   1  169.08   14.00
  -1  -9  -1  172.08   11.90
   1  -9   1  182.68    9.70
   1   9   1  168.98   10.90
   1   9   1  144.09   15.50
  -1   9  -1  178.48    9.70
   1   9   1  167.98    9.90
   1   9   1  163.88   12.70
  -1   9  -1  147.19   15.00
  -1   9  -1  165.18   12.00
  -2  -9  -1  124.79    9.60
   2  -9   1  115.19    9.30
  -2  -9  -1  100.39   11.90
  -2  -9  -1  120.99   10.40
   2  -9   1  117.19   12.90
   2   9   1  128.09   13.20
   2   9   1  121.19    8.30
  -2   9  -1  115.99    8.40
  -2   9  -1  116.29   11.50
   2   9   1  106.29   10.40
  -2   9  -1  126.99   14.30
   2   9   1   95.99   11.40
   3  -9   1  943.51   35.10
  -3  -9  -1  963.60   34.30
   3  -9   1  943.81   32.20
  -3  -9  -1 1002.30   32.50
  -3   9  -1  958.40   35.40
   3   9   1  973.10   36.70
   3   9   1  932.51   32.60
  -3   9  -1  956.70   33.90
   3   9   1  959.10   32.70
  -3   9  -1  986.70   31.00
   4  -9   1   76.99   10.40
  -4  -9  -1   84.19    9.90
   4  -9   1   56.19    7.70
  -4  -9  -1   78.59   13.00
   4   9   1   67.69   10.10
  -4   9  -1   90.79   10.50
   4   9   1   65.69   11.90
   4   9   1   75.99   10.00
   4   9   1   76.19    9.00
  -4   9  -1   82.79    9.90
  -4   9  -1   68.99   10.80
  -5  -9  -1   23.10   12.10
   5  -9   1   30.10    9.50
   5  -9   1   25.70    7.30
  -5  -9  -1   21.40    6.90
   5   9   1   25.80    9.10
  -5   9  -1   26.70    7.60
   5   9   1   23.90    8.00
  -5   9  -1   42.70   10.70
   5   9   1   29.60    9.00
  -5   9  -1   21.80    8.50
   6  -9   1   10.10   10.50
  -6  -9  -1    4.10    7.40
   6  -9   1    9.20    8.60
  -6  -9  -1   -0.10   12.30
   6   9   1   -3.10    9.40
  -6   9  -1   -7.00    8.50
  -6   9  -1    3.30    8.10
  -6   9  -1    6.20   10.50
   6   9   1   19.50    9.70
   6   9   1    7.80    9.00
   7  -9   1  144.69   16.60
   7  -9   1  122.89   15.50
  -7  -9  -1  119.49   12.50
  -7   9  -1  114.39   13.80
  -7   9  -1  112.39   15.30
   7   9   1  115.69   13.20
   7   9   1  118.89   13.40
  -7   9  -1  133.89   16.70
   7   9   1  115.39   14.80
   8  -9   1    0.40   14.60
  -8  -9  -1    6.80    8.70
   8  -9   1    4.10   11.40
  -8  -9  -1   -0.40   21.60
   8   9   1  -12.90   10.90
   8   9   1   16.70   11.70
  -8   9  -1   -7.50   10.10
  -8   9  -1   11.00   12.80
   8   9   1   16.30   12.70
  -8   9  -1    5.30   14.20
   9  -9   1  155.68   21.30
  -9  -9  -1  149.39   18.70
   9  -9   1  127.49   17.30
  -9  -9  -1  136.29   23.90
   9   9   1  133.49   18.50
  -9   9  -1  125.89   15.90
   9   9   1  148.69   17.30
  -9   9  -1  157.98   19.50
   9   9   1  144.79   17.30
  -9   9  -1  124.09   18.40
  10  -9   1   -9.30   20.10
 -10  -9  -1   22.50   23.30
  10  -9   1   12.60   20.20
 -10  -9  -1   14.50   12.90
  10   9   1   49.10   18.20
 -10   9  -1    8.60   18.40
  10   9   1   16.20   24.20
 -10   9  -1   26.80   16.10
 -10   9  -1    9.70   19.00
 -11  -9  -1    7.70   27.60
 -11  -9  -1   13.40   15.20
  11  -9   1   18.40   18.70
  11  -9   1  -43.20   22.40
  11   9   1  -16.60   17.30
 -11   9  -1   15.70   22.00
 -11   9  -1  -35.20   22.40
  11   9   1  -12.70   21.70
  11   9   1  -13.10   18.00
 -11   9  -1   29.60   16.30
  12  -9   1   24.80   23.90
  12  -9   1   40.70   52.39
 -12  -9  -1   22.90   32.50
 -12  -9  -1   13.10   18.70
  12   9   1    9.00   30.50
 -12   9  -1    4.50   18.90
 -12   9  -1   -2.10   27.10
  12   9   1   38.90   23.20
  12   9   1  -18.50   19.60
 -12   9  -1  -12.50   26.10
  13  -9   1  -12.40   25.90
  13  -9   1  -58.99   32.00
 -13  -9  -1   14.30   20.70
 -13   9  -1   32.30   22.50
  13   9   1   -8.40   26.80
  13   9   1  -11.20   23.10
 -13   9  -1  -17.20   33.50
  14  -9   1    3.60   41.10
 -14  -9  -1   70.49   26.30
  14  -9   1  -29.20   33.20
 -14   9  -1   40.20   25.90
 -14   9  -1   11.10   42.90
  14   9   1   19.60   32.10
 -13 -10   1   68.09   22.40
  13 -10  -1   62.39   29.60
  13 -10  -1  127.69   36.90
  13  10  -1   19.10   26.40
 -13  10   1    9.10   35.20
 -13  10   1   -2.20   22.50
  13  10  -1  -15.30   23.90
 -12 -10   1   29.20   19.10
  12 -10  -1   40.40   25.30
  12 -10  -1   -0.90   30.70
 -12 -10   1   59.99   33.80
 -12  10   1   59.99   19.70
 -12  10   1   12.50   26.60
  12  10  -1   22.60   37.70
  12  10  -1   71.49   23.90
 -12  10   1   25.70   30.20
  11 -10  -1   49.99   21.20
 -11 -10   1   26.90   17.10
 -11 -10   1   24.60   28.20
  11  10  -1   55.99   21.50
 -11  10   1   65.69   24.10
 -11  10   1   38.90   16.70
 -11  10   1   50.79   22.70
  11  10  -1   35.30   20.00
  11  10  -1   47.80   22.90
 -10 -10   1   54.19   14.60
  10 -10  -1   51.69   18.70
  10 -10  -1   43.00   22.40
 -10  10   1   34.80   20.30
  10  10  -1   49.80   18.00
 -10  10   1   47.40   18.50
  10  10  -1   47.10   17.20
  10  10  -1   90.29   19.00
 -10  10   1   45.10   14.50
   9 -10  -1  323.27   27.20
  -9 -10   1  334.27   29.30
   9 -10  -1  356.26   32.10
   9  10  -1  251.07   24.80
  -9  10   1  342.87   23.80
  -9  10   1  273.67   26.80
   9  10  -1  251.07   26.20
   9  10  -1  271.67   27.00
  -9  10   1  307.27   29.30
  -8 -10   1   75.19   12.40
   8 -10  -1   94.39   18.30
  -8 -10   1   68.39   18.90
   8 -10  -1   90.79   15.30
   8  10  -1   80.69   14.40
  -8  10   1  111.89   14.30
   8  10  -1  107.69   14.40
  -8  10   1  133.59   17.90
   8  10  -1   85.49   14.70
  -8  10   1   72.19   14.70
   7 -10  -1   54.69   11.90
  -7 -10   1   81.99   11.50
  -7 -10   1   74.69   17.10
   7 -10  -1   80.29   15.50
  -7  10   1   73.89   12.50
  -7  10   1   61.19   15.50
   7  10  -1   73.79   12.60
   7  10  -1   83.29   13.00
  -7  10   1   72.89   11.40
   7  10  -1   68.69   12.80
   6 -10  -1   -2.50   11.20
   6 -10  -1   16.00   14.60
  -6 -10   1    5.30   11.20
  -6 -10   1    4.20    7.60
   6 -10  -1   11.50    9.40
  -6  10   1   -2.30    8.20
  -6  10   1   -5.60    8.50
   6  10  -1    1.40   10.30
   6  10  -1    5.40    9.10
   6  10  -1    7.90    8.50
  -6  10   1  -10.20   11.60
   5 -10  -1   52.09   10.00
  -5 -10   1   33.20    8.00
   5 -10  -1   42.00   13.70
  -5 -10   1   32.90   10.60
   5 -10  -1   33.10   10.80
  -5  10   1   48.40    9.00
  -5  10   1   36.60   12.50
   5  10  -1   45.60    8.80
   5  10  -1   46.70    9.90
  -5  10   1   34.60    8.70
   5  10  -1   45.80    9.00
   4 -10  -1  114.39   13.30
  -4 -10   1  108.29   13.60
   4 -10  -1  110.39   12.70
   4 -10  -1  131.69   15.30
  -4 -10   1  118.29   11.70
  -4  10   1  127.79   12.20
  -4  10   1  114.99   14.30
   4  10  -1  148.99   14.90
  -4  10   1  118.59   12.80
   4  10  -1  123.29   11.80
   3 -10  -1  155.98   16.20
   3 -10  -1  129.89   12.70
  -3 -10   1  121.79   12.80
  -3 -10   1  151.08   11.50
   3 -10  -1  150.08   17.40
   3  10  -1  172.28   18.50
  -3  10   1  128.39   12.10
   3  10  -1  166.18   12.70
  -3  10   1  158.48   11.90
   3  10  -1  175.68   14.80
  -3  10   1  163.18   17.30
   3  10  -1  162.88   11.30
   2 -10  -1  292.17   18.20
   2 -10  -1  288.27   18.60
  -2 -10   1  317.07   14.70
   2 -10  -1  282.77   15.80
  -2  10   1  282.67   19.70
   2  10  -1  276.57   19.70
  -2  10   1  297.57   14.60
   2  10  -1  299.97   15.00
  -2  10   1  283.87   15.30
   2  10  -1  302.17   13.30
   1 -10  -1  361.06   20.30
   1 -10  -1  361.46   19.00
   1 -10  -1  369.16   14.60
  -1 -10   1  396.96   16.00
  -1  10   1  352.26   16.30
  -1  10   1  356.46   21.70
  -1  10   1  332.37   18.60
  -1  10   1  352.76   14.90
   1  10  -1  367.86   21.40
   1  10  -1  362.06   15.80
   1  10  -1  360.06   16.10
  -1  10   1  355.66   16.30
   0 -10  -1   85.79   10.20
   0 -10   1   76.19    8.60
   0 -10  -1   73.39    8.30
   0 -10  -1   84.69   10.90
   0  10  -1   82.49   12.30
   0  10   1   77.09    9.10
   0  10   1   88.39   12.40
   0  10  -1   78.19    7.50
   0  10   1   82.59    9.90
   0  10   1   91.69   10.90
   0  10   1   86.39    7.80
   0  10  -1   88.99    8.80
   1 -10   1  412.56   15.90
  -1 -10  -1  402.96   16.40
  -1 -10  -1  378.56   18.30
   1 -10   1  401.26   21.00
   1  10   1  385.66   17.00
  -1  10  -1  420.46   15.90
   1  10   1  390.96   16.10
   1  10   1  398.66   18.60
  -1  10  -1  388.96   21.70
  -1  10  -1  378.76   17.60
   1  10   1  394.46   22.50
  -2 -10  -1   13.60    5.20
  -2 -10  -1   20.70    7.50
  -2 -10  -1    8.50    6.30
   2 -10   1    6.80    7.60
  -2  10  -1    5.00    9.00
  -2  10  -1    5.80    4.80
   2  10   1   -0.60    9.70
   2  10   1    7.80    5.90
   2  10   1    3.20    7.50
   2  10   1    7.50    4.30
  -2  10  -1    1.90    6.40
  -3 -10  -1   40.50    6.80
   3 -10   1   57.99   10.00
  -3 -10  -1   21.80    9.20
   3 -10   1   16.40    6.60
   3  10   1   35.70   11.40
   3  10   1   43.90    8.00
  -3  10  -1   37.70    6.60
   3  10   1   41.70    8.30
  -3  10  -1   20.00    7.40
  -3  10  -1   27.60   10.30
  -4 -10  -1   29.40    7.50
  -4 -10  -1   16.90   10.70
   4 -10   1   35.30    7.50
   4 -10   1   41.20   10.40
   4  10   1   18.40    9.60
  -4  10  -1   15.90   10.60
  -4  10  -1   34.10    8.80
   4  10   1   20.90    8.80
  -4  10  -1   37.40    7.50
   4  10   1   24.10    8.70
   4  10   1   34.80   12.90
   5 -10   1   35.20   10.50
  -5 -10  -1   44.10   17.30
   5 -10   1   21.80    8.10
  -5 -10  -1   38.00    8.50
  -5  10  -1   13.70    8.50
  -5  10  -1   32.30    8.60
   5  10   1   37.00   10.00
   5  10   1   26.90   10.00
  -5  10  -1   37.90   12.00
   5  10   1   25.50    9.00
   6 -10   1   12.50    8.60
   6 -10   1   28.50   11.90
  -6 -10  -1   12.20    7.90
  -6 -10  -1    9.50   14.20
  -6  10  -1   11.90    9.50
  -6  10  -1   26.70   10.10
   6  10   1   13.20   10.50
   6  10   1   20.80    9.30
   6  10   1   19.40   10.00
  -6  10  -1   21.40   12.20
  -7 -10  -1   35.40   16.50
   7 -10   1   52.29   11.80
   7 -10   1   64.49   14.20
  -7 -10  -1   42.60    9.70
   7  10   1   45.20   11.70
  -7  10  -1   45.00   14.50
  -7  10  -1   36.40   10.80
  -7  10  -1   36.50   11.80
   7  10   1   41.40   11.90
   7  10   1   46.30   12.30
  -8 -10  -1   62.19   11.70
  -8 -10  -1  -24.60   24.00
   8 -10   1   80.19   13.70
   8 -10   1   50.99   17.80
  -8  10  -1   94.19   14.20
  -8  10  -1   52.19   14.20
  -8  10  -1   81.09   16.60
   8  10   1   64.19   15.00
   8  10   1   44.50   14.00
   8  10   1   63.59   14.10
   9 -10   1   36.20   19.40
   9 -10   1   40.50   16.00
   9  10   1   36.50   17.20
   9  10   1   59.09   15.60
  -9  10  -1   50.09   14.00
   9  10   1   44.90   15.30
  -9  10  -1   30.90   16.10
  -9  10  -1   28.60   17.00
  10 -10   1   19.70   18.70
 -10 -10  -1   75.89   27.10
  10 -10   1   60.19   22.00
 -10 -10  -1   42.60   13.70
 -10  10  -1   60.19   15.50
 -10  10  -1   65.59   20.80
  10  10   1   58.29   19.50
  10  10   1   32.70   17.10
  10  10   1   47.10   19.50
 -10  10  -1   25.80   20.20
  11 -10   1   32.90   24.80
 -11 -10  -1   20.30   30.40
 -11 -10  -1   39.00   16.40
  11 -10   1   30.70   21.60
 -11  10  -1   12.70   17.10
 -11  10  -1  -15.20   22.50
  11  10   1   23.00   23.40
  11  10   1   26.20   19.90
 -11  10  -1   -3.00   23.10
  12 -10   1   17.40   24.80
  12 -10   1   25.00   30.30
 -12 -10  -1   -4.40   36.10
 -12 -10  -1   -0.80   18.50
  12  10   1   -3.90   20.70
 -12  10  -1    1.10   29.60
  12  10   1    1.80   23.10
 -12  10  -1    1.80   19.40
 -13 -10  -1   15.10   22.20
  13 -10   1   10.10   36.10
  13 -10   1  -16.80   29.30
 -13  10  -1   -5.60   36.80
 -13  10  -1   28.20   23.50
  13  10   1  -18.20   28.00
  13  10   1  -16.10   23.00
  13 -11  -1   55.69   31.90
 -13 -11   1   82.99   24.20
  13 -11  -1   76.69   40.50
 -13  11   1   25.40   23.60
  13  11  -1   33.10   29.30
  12 -11  -1  -34.70   32.10
 -12 -11   1   -8.70   20.00
 -12 -11   1   -1.70   35.90
  12 -11  -1  -25.90   25.40
  12  11  -1   33.20   24.30
 -12  11   1   -1.60   19.50
 -12  11   1    5.50   30.30
  12  11  -1  -37.30   26.70
 -11 -11   1    5.30   17.80
  11 -11  -1  -15.50   22.50
  11 -11  -1  -10.90   27.10
 -11  11   1   31.70   25.40
 -11  11   1    2.90   24.60
 -11  11   1  -16.00   16.50
  11  11  -1   12.00   22.10
  11  11  -1   -5.90   19.70
  10 -11  -1    1.40   18.70
  10 -11  -1   35.30   24.40
 -10 -11   1    8.60   25.80
 -10 -11   1  -10.50   13.30
  10  11  -1    1.20   16.80
 -10  11   1    3.30   14.50
  10  11  -1    8.60   17.10
 -10  11   1    1.70   19.20
  10  11  -1   19.50   19.10
 -10  11   1    0.10   20.50
  -9 -11   1   27.40   12.20
   9 -11  -1   20.00   19.20
   9 -11  -1   60.79   28.00
  -9 -11   1   36.70   23.80
  -9  11   1   39.10   19.10
   9  11  -1   28.00   15.30
   9  11  -1   37.10   15.90
   9  11  -1   11.20   15.70
  -9  11   1   74.69   17.80
  -9  11   1   31.80   13.90
  -8 -11   1   69.09   12.70
   8 -11  -1  101.19   19.20
  -8 -11   1   88.49   24.00
   8 -11  -1   73.19   15.30
   8  11  -1   77.19   15.30
  -8  11   1  102.49   18.80
  -8  11   1   86.29   14.90
   8  11  -1   76.09   14.60
   8  11  -1   88.59   14.80
  -8  11   1   78.19   13.60
  -7 -11   1  237.28   23.90
  -7 -11   1  211.28   18.30
   7 -11  -1  229.08   24.90
   7 -11  -1  215.08   20.80
  -7  11   1  233.88   19.60
   7  11  -1  271.07   22.20
  -7  11   1  224.48   25.00
   7  11  -1  180.88   20.80
   7  11  -1  226.08   20.30
  -7  11   1  177.28   20.10
   6 -11  -1  259.97   28.40
  -6 -11   1  288.47   21.60
  -6 -11   1  232.78   17.50
   6 -11  -1  265.87   23.70
   6 -11  -1  246.28   19.40
  -6  11   1  242.98   18.50
  -6  11   1  248.38   25.10
  -6  11   1  274.87   19.00
   6  11  -1  233.38   19.90
   6  11  -1  239.98   18.10
   6  11  -1  230.58   20.40
   5 -11  -1   99.39   17.00
  -5 -11   1  140.19   14.40
   5 -11  -1  113.09   12.70
   5 -11  -1  108.19   15.60
  -5 -11   1  129.79   13.70
  -5  11   1  127.29   15.30
  -5  11   1  119.49   14.30
   5  11  -1  131.29   14.50
   5  11  -1  127.39   14.10
   5  11  -1  147.29   15.40
  -5  11   1  125.09   16.10
   4 -11  -1   17.60   12.90
  -4 -11   1    5.70    7.10
  -4 -11   1    9.30    9.20
   4 -11  -1   10.40   10.20
   4 -11  -1    6.60    8.10
  -4  11   1    2.20    7.50
   4  11  -1    5.70    7.50
   4  11  -1   -9.80   12.30
   4  11  -1    9.10    7.70
   4  11  -1    9.40    8.70
  -4  11   1    6.90    7.00
   3 -11  -1  199.68   23.30
  -3 -11   1  218.38   14.10
   3 -11  -1  223.58   15.50
   3 -11  -1  233.68   19.10
  -3 -11   1  240.68   14.90
   3  11  -1  234.08   21.70
   3  11  -1  249.88   16.20
  -3  11   1  204.68   13.70
  -3  11   1  243.98   21.40
   3  11  -1  205.98   17.50
  -3  11   1  213.58   15.10
  -2 -11   1   57.09    7.60
   2 -11  -1   50.09   11.20
   2 -11  -1   42.40   10.00
   2  11  -1   28.40   13.60
  -2  11   1   41.60   12.00
   2  11  -1   39.10    7.50
  -2  11   1   32.40    7.40
   2  11  -1   43.00    6.30
   1 -11  -1    7.60    8.20
   1 -11  -1    9.30    4.80
  -1 -11   1    6.10    5.60
   1 -11  -1    5.60    8.40
  -1  11   1   11.10   11.30
   1  11  -1   11.80    6.10
  -1  11   1    3.60    5.20
   1  11  -1    5.70    5.20
  -1  11   1    4.20    5.40
  -1  11   1    4.20    8.60
   1  11  -1   13.20   10.90
  -1  11   1    8.20    6.80
   0 -11  -1  218.98   11.70
   0 -11   1  209.58   11.90
   0 -11  -1  201.48   17.20
   0 -11  -1  164.38   15.40
   0  11  -1  196.38   13.00
   0  11   1  202.08   15.30
   0  11   1  211.98   12.10
   0  11   1  179.28   19.30
   0  11   1  190.78   12.30
   0  11  -1  229.18   19.60
   0  11  -1  201.48   12.20
   0  11   1  226.18   14.50
  -1 -11  -1  124.49   10.70
   1 -11   1  163.88   15.90
  -1 -11  -1  126.89   14.20
   1 -11   1  139.79   10.00
   1  11   1  130.59   15.40
  -1  11  -1  135.19   10.30
  -1  11  -1  148.49   18.10
   1  11   1  153.28   13.90
   1  11   1  137.59   14.40
  -1  11  -1  142.09   12.10
   1  11   1  144.59   10.40
   1  11   1  155.48   11.80
  -2 -11  -1   31.80    6.80
  -2 -11  -1   34.30    8.00
  -2 -11  -1   37.20    8.40
   2 -11   1   48.60   10.50
  -2  11  -1   32.60    8.20
   2  11   1   26.10    8.30
   2  11   1   31.20    5.60
  -2  11  -1   34.30   11.30
  -2  11  -1   36.40    5.50
   2  11   1   25.60    7.40
  -3 -11  -1  114.59   14.90
   3 -11   1  123.99   14.00
  -3 -11  -1  134.19   12.10
  -3  11  -1  123.79   13.80
  -3  11  -1  138.99   11.00
  -3  11  -1  127.79   14.80
   3  11   1  141.69   13.70
   3  11   1  149.88   16.20
   3  11   1  137.59   14.90
  -4 -11  -1  -15.50    9.80
   4 -11   1   10.50    7.30
   4 -11   1   -0.60    9.70
  -4 -11  -1    2.10    7.10
   4  11   1    9.30    9.30
   4  11   1   -4.60   13.00
   4  11   1    3.10    8.20
  -4  11  -1    3.60    6.70
  -4  11  -1    7.20   11.90
   4  11   1    0.50    8.80
  -4  11  -1   11.70    7.90
   5 -11   1  178.18   20.80
  -5 -11  -1  138.79   14.20
  -5 -11  -1  155.68   20.00
   5 -11   1  150.78   15.50
   5  11   1  151.58   17.80
   5  11   1  165.28   16.80
  -5  11  -1  156.78   17.20
  -5  11  -1  178.68   16.90
  -5  11  -1  170.28   14.70
   5  11   1  151.78   16.10
   5  11   1  189.38   24.40
   6 -11   1    9.30    9.10
   6 -11   1   30.20   13.30
  -6 -11  -1   27.30    8.60
  -6  11  -1   18.80   13.30
   6  11   1   21.70   10.80
   6  11   1    9.00   10.30
  -6  11  -1    2.30   10.10
   6  11   1   11.60   11.50
  -6  11  -1   29.70   10.80
   7 -11   1  132.39   18.30
   7 -11   1  165.18   19.10
  -7 -11  -1  147.19   21.40
  -7 -11  -1  145.09   17.00
   7  11   1  151.98   15.70
  -7  11  -1  187.28   24.30
   7  11   1  135.49   15.30
  -7  11  -1  165.28   19.10
  -7  11  -1  153.78   16.80
   7  11   1  173.18   21.10
   8 -11   1   30.40   13.60
  -8 -11  -1    2.20   19.50
   8 -11   1   29.30   17.30
  -8 -11  -1    7.70   10.30
  -8  11  -1   29.90   17.90
  -8  11  -1  -13.50   11.80
   8  11   1   17.30   13.60
  -8  11  -1   -3.70   13.00
   8  11   1   31.10   14.20
   8  11   1   20.30   14.20
   9 -11   1   11.70   19.40
  -9 -11  -1    8.60   11.70
  -9 -11  -1  -24.80   23.50
   9 -11   1   54.69   16.10
   9  11   1   17.40   16.50
  -9  11  -1  -10.80   16.50
  -9  11  -1   18.30   13.90
  -9  11  -1   -5.20   19.10
   9  11   1    7.40   15.40
   9  11   1   -9.00   16.30
 -10 -11  -1   59.29   16.10
  10 -11   1    1.90   18.30
  10 -11   1   36.40   21.40
 -10  11  -1   20.60   15.70
 -10  11  -1   45.40   21.30
  10  11   1   41.40   19.90
  10  11   1   18.30   18.50
  10  11   1   16.10   20.10
 -10  11  -1   -2.40   21.10
 -11 -11  -1   19.50   32.30
  11 -11   1   24.90   22.80
  11 -11   1   52.39   27.20
 -11 -11  -1   31.70   18.10
  11  11   1  -34.80   20.50
 -11  11  -1   -8.90   24.00
  11  11   1  -13.00   23.00
 -11  11  -1  -11.20   24.40
 -11  11  -1   20.80   17.70
  12 -11   1   51.49   26.90
 -12 -11  -1   27.10   36.90
 -12 -11  -1   38.40   20.60
  12 -11   1   84.99   32.70
 -12  11  -1   16.30   30.50
  12  11   1   64.59   25.40
 -12  11  -1   60.49   21.50
 -13 -11  -1   45.10   23.30
  13 -11   1   20.90   31.00
  13 -11   1   83.19   40.70
 -13  11  -1    2.60   38.60
  13  11   1  122.59   29.90
 -13  11  -1   14.50   24.20
 -13 -12   1   84.29   25.80
  13 -12  -1   10.20   33.50
  13 -12  -1    9.90   40.90
 -13  12   1   35.80   24.90
  13  12  -1  -16.40   28.80
 -12 -12   1    5.30   20.30
  12 -12  -1   51.59   34.50
  12 -12  -1   13.40   28.30
 -12  12   1    1.20   21.10
  12  12  -1   13.50   27.70
  12  12  -1   10.70   24.50
 -12  12   1   58.09   33.60
  11 -12  -1  116.29   30.80
 -11 -12   1   69.79   34.70
  11 -12  -1   64.09   26.10
 -11 -12   1   55.59   19.50
  11  12  -1   65.59   23.30
  11  12  -1   68.39   22.30
 -11  12   1  121.09   29.40
 -11  12   1   67.49   19.30
 -10 -12   1  191.18   21.00
  10 -12  -1  185.48   24.80
 -10 -12   1  171.38   32.90
 -10  12   1  229.88   26.90
 -10  12   1  214.78   25.00
  10  12  -1  187.78   23.80
 -10  12   1  246.18   27.40
  10  12  -1  169.68   22.50
  10  12  -1  154.58   22.20
  -9 -12   1   79.79   15.90
   9 -12  -1  102.29   22.60
   9 -12  -1   62.79   18.30
  -9  12   1   76.79   19.10
  -9  12   1   97.19   22.30
   9  12  -1   93.49   17.50
   9  12  -1   73.19   17.70
   9  12  -1   73.79   18.50
  -9  12   1   76.29   16.00
  -8 -12   1  175.48   21.40
  -8 -12   1  168.38   21.40
   8 -12  -1  190.68   22.60
   8  12  -1  108.29   23.10
  -8  12   1  176.98   18.50
   8  12  -1  164.38   18.60
   8  12  -1  184.08   18.10
  -8  12   1  213.78   23.10
  -7 -12   1   24.10   15.10
  -7 -12   1   10.20   10.50
   7 -12  -1   16.30   16.00
   7 -12  -1    0.40   13.10
   7  12  -1    8.70   12.00
  -7  12   1   19.00   16.30
   7  12  -1    2.60   12.30
  -7  12   1    9.60   12.50
   7  12  -1   44.50   14.40
  -7  12   1   17.00   11.10
  -6 -12   1  127.49   13.80
  -6 -12   1  162.98   16.80
   6 -12  -1  146.19   18.50
   6 -12  -1  123.39   15.30
  -6  12   1  150.68   19.30
   6  12  -1  164.48   19.30
  -6  12   1  135.89   14.40
   6  12  -1  150.68   14.10
  -6  12   1  152.58   17.30
   6  12  -1  139.19   16.90
  -5 -12   1   66.79   10.30
   5 -12  -1   67.89   12.00
   5 -12  -1   55.39   17.90
  -5 -12   1   61.19   13.30
  -5  12   1   86.09   16.10
  -5  12   1   78.99   11.50
   5  12  -1   72.59   13.90
   5  12  -1   65.59   17.00
   5  12  -1   72.09   12.20
  -5  12   1   78.09   11.10
   5  12  -1   90.39   10.70
   4 -12  -1   53.39   13.00
   4 -12  -1   46.00   10.40
  -4 -12   1   43.00    9.00
  -4 -12   1   45.40   10.80
   4 -12  -1   14.70   13.60
   4  12  -1   33.70    9.50
   4  12  -1   23.50   11.40
   4  12  -1   21.70    8.50
  -4  12   1   48.20    9.90
  -4  12   1   40.00   14.00
   4  12  -1   44.80   14.90
  -4  12   1   31.40    9.10
   3 -12  -1  143.09   18.70
   3 -12  -1  137.29   17.20
   3 -12  -1  168.98   15.20
  -3 -12   1  138.79   13.70
  -3  12   1  143.39   13.30
   3  12  -1  141.79   14.70
  -3  12   1  147.29   17.10
   3  12  -1  173.38   18.80
  -3  12   1  122.09   14.20
   3  12  -1  157.68   12.40
   3  12  -1  143.79   17.40
   2 -12  -1   59.79   12.70
   2 -12  -1   61.49   15.00
   2 -12  -1   67.29    7.30
  -2 -12   1   98.79   10.00
   2  12  -1   77.39    7.90
  -2  12   1   76.39    9.20
  -2  12   1   64.29    9.30
   2  12  -1   76.39    9.70
  -2  12   1   60.19   14.20
  -2  12   1   82.89   12.20
   2  12  -1   56.49   14.20
   1 -12  -1  325.57   14.40
   1 -12  -1  287.37   21.70
  -1 -12   1  322.37   16.00
   1 -12  -1  282.87   20.90
   1  12  -1  324.17   24.20
  -1  12   1  283.87   24.00
  -1  12   1  312.57   19.50
  -1  12   1  292.97   16.90
   1  12  -1  348.17   16.60
   1  12  -1  301.67   15.40
  -1  12   1  302.07   16.50
  -1  12   1  317.97   14.90
   0 -12  -1  172.68   16.30
   0 -12  -1  160.58   11.30
   0 -12   1  167.78   11.80
   0 -12  -1  161.38   17.60
   0  12   1  120.49   16.70
   0  12   1  149.09   12.20
   0  12   1  156.98   12.20
   0  12  -1  154.78   13.00
   0  12   1  170.58   14.70
   0  12  -1  173.68   12.10
   0  12   1  137.69   15.00
  -1 -12  -1  572.54   25.80
  -1 -12  -1  621.14   23.00
   1 -12   1  596.84   28.20
  -1  12  -1  597.64   21.90
   1  12   1  593.44   22.50
  -1  12  -1  606.14   34.70
   1  12   1  586.84   24.50
   1  12   1  605.34   23.50
   1  12   1  578.74   30.50
  -1  12  -1  560.84   24.40
  -2 -12  -1  419.56   20.60
  -2 -12  -1  398.96   18.60
   2 -12   1  423.66   23.70
  -2 -12  -1  406.46   20.50
   2  12   1  413.96   27.50
   2  12   1  421.26   19.80
  -2  12  -1  414.56   20.60
   2  12   1  451.55   17.50
  -2  12  -1  369.46   26.30
   2  12   1  396.36   19.90
  -3 -12  -1  419.76   22.00
   3 -12   1  374.56   19.20
   3 -12   1  385.06   23.60
  -3 -12  -1  386.86   19.30
   3  12   1  438.06   28.10
   3  12   1  391.46   19.80
   3  12   1  373.76   20.20
  -3  12  -1  394.66   21.10
   4 -12   1  188.18   20.60
  -4 -12  -1  216.48   15.70
   4 -12   1  196.98   16.70
  -4 -12  -1  199.88   19.70
  -4  12  -1  204.48   14.50
   4  12   1  198.08   24.30
   4  12   1  235.48   20.20
  -4  12  -1  203.28   25.70
   4  12   1  197.68   17.60
  -4  12  -1  192.28   17.30
   4  12   1  230.88   17.20
  -5 -12  -1  233.48   17.50
   5 -12   1  254.17   23.00
  -5 -12  -1  236.48   22.30
   5 -12   1  260.07   18.40
  -5  12  -1  250.87   24.80
  -5  12  -1  269.37   17.70
   5  12   1  302.97   19.30
   5  12   1  261.17   20.90
   5  12   1  286.97   28.40
   5  12   1  255.37   20.20
  -5  12  -1  251.37   19.60
   6 -12   1   51.89   12.30
   6 -12   1   65.59   16.80
  -6 -12  -1   52.29   16.00
  -6 -12  -1   56.39   11.30
   6  12   1   85.79   13.30
   6  12   1   46.80   19.00
   6  12   1   77.39   13.70
  -6  12  -1   47.60   16.50
  -6  12  -1   69.19   12.40
  -6  12  -1   64.69   12.80
   6  12   1   68.09   13.40
   7 -12   1   21.70   12.30
  -7 -12  -1   21.60   18.50
   7 -12   1   27.70   16.00
  -7 -12  -1   24.90   10.90
  -7  12  -1   30.40   12.20
   7  12   1   38.10   13.70
  -7  12  -1   46.40   17.50
   7  12   1   38.30   14.10
   7  12   1   28.50   12.50
  -7  12  -1   13.20   12.70
  -8 -12  -1   47.90   23.80
   8 -12   1  -21.50   15.50
  -8 -12  -1   -0.90   11.30
   8 -12   1   12.40   17.70
  -8  12  -1    1.90   17.90
  -8  12  -1    1.80   16.00
  -8  12  -1   11.20   14.80
   8  12   1   25.60   15.60
   8  12   1    7.80   14.90
   9 -12   1  141.99   23.20
  -9 -12  -1  118.49   28.30
  -9 -12  -1  102.59   15.90
   9 -12   1  132.39   21.50
  -9  12  -1  119.79   20.70
  -9  12  -1   91.69   17.60
   9  12   1  142.79   19.80
   9  12   1  122.09   19.50
  -9  12  -1  157.48   23.30
   9  12   1   92.19   20.50
  10 -12   1   67.19   24.50
 -10 -12  -1   20.60   28.40
 -10 -12  -1   34.40   16.20
  10 -12   1    5.50   20.60
  10  12   1   46.70   21.70
 -10  12  -1   45.00   22.20
  10  12   1   60.99   20.60
  10  12   1   80.19   20.40
 -10  12  -1   76.09   17.90
 -10  12  -1   72.59   24.10
  11 -12   1   26.50   24.80
  11 -12   1   13.90   28.10
 -11 -12  -1   10.00   17.70
  11  12   1   29.40   21.80
 -11  12  -1   45.60   27.50
 -11  12  -1   32.90   19.00
  11  12   1  -14.40   23.70
  12 -12   1  -17.30   26.70
 -12 -12  -1   69.99   21.40
  12 -12   1   -1.50   33.40
 -12  12  -1   -4.30   32.80
  12  12   1  -18.80   25.50
  12  12   1   -5.40   28.20
 -12  12  -1   28.20   22.30
 -13 -12  -1   65.59   25.10
  13 -12   1   25.20   33.30
  13 -12   1   53.49   42.00
 -13  12  -1    2.00   41.90
  13  12   1  -43.10   30.70
 -13  12  -1   38.50   25.80
  12 -13  -1  -27.50   35.60
 -12 -13   1   53.69   22.60
  12 -13  -1   -8.70   27.80
 -12  13   1   28.70   22.10
  12  13  -1   34.20   26.70
  11 -13  -1   13.20   26.20
 -11 -13   1   15.60   47.10
  11 -13  -1   85.09   32.00
 -11  13   1    7.70   31.00
 -11  13   1   13.00   19.00
  11  13  -1   40.90   23.70
  11  13  -1  -38.70   23.80
 -10 -13   1   -8.90   24.80
  10 -13  -1    5.80   26.50
 -10 -13   1   -5.70   16.00
  10 -13  -1   19.50   22.30
  10  13  -1   12.10   20.20
 -10  13   1    8.70   23.30
 -10  13   1   23.80   17.40
 -10  13   1   -7.30   26.50
  10  13  -1  -22.40   19.40
  -9 -13   1    9.00   14.10
   9 -13  -1  -11.40   21.70
  -9 -13   1   -3.40   21.40
   9 -13  -1   22.10   19.20
  -9  13   1   20.50   19.10
   9  13  -1  -16.30   15.90
  -9  13   1   17.40   23.20
  -9  13   1    5.00   14.50
   9  13  -1   18.20   18.00
   9  13  -1   -6.10   16.40
   8 -13  -1   42.20   16.30
  -8 -13   1    1.90   12.10
  -8 -13   1   49.99   19.20
   8 -13  -1   31.70   19.60
   8  13  -1   26.00   16.60
   8  13  -1   46.50   16.40
  -8  13   1    7.60   12.60
  -8  13   1   29.30   16.40
  -8  13   1   16.00   19.80
   8  13  -1   32.30   14.90
   7 -13  -1  171.08   21.60
   7 -13  -1  159.98   24.60
  -7 -13   1  141.29   18.80
  -7  13   1  122.49   15.80
   7  13  -1  140.09   17.80
   7  13  -1  146.29   16.10
  -7  13   1  161.38   21.00
  -6 -13   1   94.89   16.10
  -6 -13   1   71.19   13.10
   6 -13  -1   77.99   14.30
   6 -13  -1   85.79   17.50
   6  13  -1   93.59   12.60
  -6  13   1   93.69   19.30
   6  13  -1   77.99   13.80
  -6  13   1   78.59   13.00
   6  13  -1   86.39   21.50
  -6  13   1   90.69   12.80
   6  13  -1   81.99   14.90
  -5 -13   1   14.20    9.30
   5 -13  -1   46.70   17.40
   5 -13  -1   22.40   11.40
   5 -13  -1   17.10   14.60
  -5 -13   1   27.80   12.40
   5  13  -1   39.40   11.30
  -5  13   1   11.80    9.60
   5  13  -1   17.30   17.90
   5  13  -1   21.10    9.50
  -5  13   1   31.60   10.50
   5  13  -1    8.40   12.30
  -5  13   1   18.20   16.10
   4 -13  -1  132.89   17.30
  -4 -13   1  134.79   16.40
  -4 -13   1  115.39   14.60
   4 -13  -1  145.39   19.40
   4 -13  -1  119.89   14.00
  -4  13   1  132.69   18.50
  -4  13   1  121.19   15.30
  -4  13   1  131.79   15.20
   4  13  -1  146.79   17.00
   4  13  -1  108.19   19.20
   4  13  -1  139.39   14.20
   4  13  -1  119.49   13.70
   3 -13  -1  227.18   24.10
   3 -13  -1  165.78   21.40
  -3 -13   1  198.38   15.80
   3 -13  -1  183.98   17.40
  -3  13   1  189.08   16.50
   3  13  -1  183.68   19.60
   3  13  -1  203.98   17.20
  -3  13   1  201.68   15.40
  -3  13   1  189.48   24.70
   3  13  -1  215.88   25.60
  -2 -13   1   31.20    8.20
   2 -13  -1   12.50   12.30
   2 -13  -1   33.20   13.60
  -2  13   1   59.69   12.70
   2  13  -1   39.40    9.00
  -2  13   1   39.30   15.20
   2  13  -1   43.50    7.40
  -2  13   1   29.20    8.70
  -2  13   1   50.29    9.20
   2  13  -1   49.90   15.80
   1 -13  -1    5.90   11.80
   1 -13  -1    4.10    5.60
   1 -13  -1    6.80   12.80
  -1 -13   1   -2.60    6.60
  -1  13   1    7.20    7.20
  -1  13   1   10.10   13.60
  -1  13   1   10.10    6.90
   1  13  -1    5.50    6.40
   1  13  -1   -0.40    7.30
   1  13  -1   -3.90   13.20
   0 -13  -1   17.60    6.80
   0 -13  -1   34.00   11.50
   0 -13   1   30.80    7.30
   0 -13  -1   17.90   11.50
   0  13   1   14.30    7.20
   0  13  -1   21.20    7.60
   0  13  -1   24.40    7.90
   0  13   1   20.40    7.40
   0  13   1   35.10   13.80
   0  13  -1   16.10   14.10
   1 -13   1    5.20   11.10
  -1 -13  -1    3.80    6.50
  -1 -13  -1    4.30    9.40
   1  13   1    1.30   10.10
  -1  13  -1    8.00    6.20
   1  13   1    3.40    7.50
   1  13   1   16.90   13.80
  -1  13  -1   15.30   13.80
   1  13   1   10.40    6.50
  -1  13  -1    9.80    7.80
  -2 -13  -1   98.69   10.40
   2 -13   1   92.99   15.00
  -2 -13  -1  101.39   12.00
   2  13   1  115.19   11.60
   2  13   1  105.09   17.80
  -2  13  -1   88.09   11.80
   2  13   1   89.69   11.00
  -2  13  -1   75.19   15.80
   2  13   1  103.39   11.60
  -3 -13  -1   84.89   10.60
   3 -13   1   93.19   15.40
  -3 -13  -1  106.39   12.70
  -3  13  -1  106.69   12.00
  -3  13  -1   87.99   17.20
   3  13   1   98.39   11.60
  -3  13  -1   85.49   12.30
   3  13   1   73.79   11.00
   3  13   1   85.79   17.50
  -4 -13  -1    1.70   11.50
   4 -13   1   32.20   14.00
  -4 -13  -1   21.30    8.90
   4 -13   1   11.10    9.10
  -4  13  -1   19.20    9.80
  -4  13  -1   16.00   15.20
  -4  13  -1   18.70    8.30
   4  13   1   10.20   11.30
   4  13   1    8.50   10.00
   4  13   1   17.20   10.40
   4  13   1   -9.80   15.90
   5 -13   1   28.30   11.40
  -5 -13  -1   12.90   13.70
  -5 -13  -1   17.10    9.30
   5 -13   1   16.60   14.20
  -5  13  -1   20.80   15.30
   5  13   1   18.80   18.00
  -5  13  -1   45.90   11.80
  -5  13  -1   13.10   10.10
   5  13   1   16.10   11.40
   5  13   1   32.80   13.00
   5  13   1   17.70   10.90
  -6 -13  -1   21.80   10.50
   6 -13   1   29.60   16.10
  -6 -13  -1   11.00   15.20
   6 -13   1    8.70   11.70
  -6  13  -1    2.60   16.60
  -6  13  -1   18.80   11.70
   6  13   1    8.00   12.50
   6  13   1   14.30   12.10
   6  13   1    6.90   18.60
  -6  13  -1   11.60   11.10
   6  13   1   10.30   13.30
   7 -13   1   27.90   18.10
  -7 -13  -1   26.80   16.80
  -7 -13  -1   -4.40   16.40
   7 -13   1  -18.30   22.00
   7  13   1   24.00   13.40
   7  13   1   30.00   14.70
  -7  13  -1   34.00   18.60
   7  13   1    7.20   24.90
   7  13   1   -9.90   21.90
  -7  13  -1   36.10   13.60
   8 -13   1   27.20   14.60
  -8 -13  -1    4.70   20.10
  -8 -13  -1  -15.20   11.50
   8 -13   1   10.20   19.00
  -8  13  -1    1.10   19.40
  -8  13  -1   24.80   15.90
  -8  13  -1    8.40   13.80
   8  13   1    6.20   15.30
   8  13   1    6.30   16.30
   8  13   1   31.40   16.80
   8  13   1  -34.90   24.30
  -9 -13  -1    5.60   13.70
  -9 -13  -1   -6.60   44.50
   9 -13   1   30.80   22.00
   9 -13   1    9.40   17.80
   9  13   1   -2.20   18.90
   9  13   1   -5.60   19.70
   9  13   1   -2.00   17.50
  -9  13  -1   -1.50   22.60
  -9  13  -1   30.40   16.20
  -9  13  -1   34.30   19.30
 -10 -13  -1   11.90   16.30
  10 -13   1  -14.50   19.60
 -10 -13  -1    1.30   34.40
  10 -13   1   -0.90   30.60
  10  13   1   31.30   20.90
  10  13   1    5.20   21.10
 -10  13  -1   -3.50   24.80
 -10  13  -1   69.79   18.80
  11 -13   1   53.59   29.60
 -11 -13  -1  -16.30   18.60
  11 -13   1   -0.70   25.20
 -11 -13  -1   50.89   40.10
  11  13   1    3.70   24.80
 -11  13  -1  -10.40   19.90
 -11  13  -1   53.69   30.30
  11  13   1   -1.90   23.20
  12 -13   1  -46.90   34.90
  12 -13   1  -49.30   28.40
 -12 -13  -1  -34.80   20.70
 -12  13  -1   19.40   23.00
 -12  13  -1    2.10   35.20
  12  13   1   -8.90   28.00
  12 -14  -1   36.00   32.50
 -12 -14   1   55.19   22.90
  12 -14  -1  104.19   39.10
 -12  14   1   84.19   24.90
  12  14  -1   70.09   29.30
  11 -14  -1    8.40   26.70
  11 -14  -1   93.79   34.80
 -11 -14   1   16.60   20.40
 -11 -14   1  -16.70   27.60
  11  14  -1  -52.29   23.00
 -11  14   1  -25.00   19.40
  11  14  -1  -24.00   24.80
 -11  14   1   44.70   34.00
  10 -14  -1   43.00   29.70
 -10 -14   1   45.80   26.80
 -10 -14   1   77.09   18.70
  10 -14  -1    6.60   24.30
 -10  14   1   52.69   29.20
 -10  14   1   39.00   18.90
  10  14  -1   63.09   21.80
  10  14  -1  -17.80   21.10
   9 -14  -1   30.90   21.70
  -9 -14   1   64.89   16.80
   9 -14  -1   63.79   25.90
  -9 -14   1   82.59   23.30
  -9  14   1   62.29   17.30
   9  14  -1   22.90   19.20
   9  14  -1   43.00   18.40
  -9  14   1   53.59   20.10
  -9  14   1   47.40   26.20
   8 -14  -1    2.30   17.50
  -8 -14   1  -21.60   12.30
  -8 -14   1   22.20   20.00
   8 -14  -1   13.90   20.80
  -8  14   1   21.10   14.10
  -8  14   1   -7.40   21.50
   8  14  -1   13.70   15.50
  -8  14   1    2.00   17.50
   8  14  -1    1.90   17.00
   8  14  -1   35.70   18.30
   7 -14  -1   72.89   20.80
   7 -14  -1   55.49   16.60
  -7 -14   1   24.90   17.80
  -7 -14   1   25.70   12.70
   7  14  -1   39.50   13.90
  -7  14   1   42.00   19.80
   7  14  -1   60.89   15.60
  -7  14   1   61.29   13.70
  -7  14   1   67.89   15.30
   7  14  -1   38.40   15.80
   7  14  -1   31.30   25.60
  -6 -14   1   77.29   15.40
   6 -14  -1   13.70   21.10
   6 -14  -1   66.69   17.50
  -6 -14   1   53.79   12.60
   6  14  -1   53.59   12.10
  -6  14   1   21.20   18.00
  -6  14   1   73.39   13.60
   6  14  -1   58.09   23.10
  -6  14   1   45.10   18.50
   6  14  -1   43.30   14.00
  -5 -14   1  401.56   24.90
   5 -14  -1  381.76   24.90
  -5 -14   1  369.26   23.00
   5 -14  -1  398.56   28.80
  -5  14   1  364.56   32.50
  -5  14   1  369.56   24.00
  -5  14   1  367.76   22.70
   5  14  -1  382.66   20.30
   5  14  -1  424.26   27.80
   5  14  -1  379.76   25.10
   5  14  -1  334.47   34.40
   4 -14  -1   72.29   15.80
  -4 -14   1   50.99   11.60
   4 -14  -1   60.59   12.90
  -4 -14   1   43.70   10.80
   4 -14  -1   40.20   17.70
   4  14  -1   46.30   12.00
   4  14  -1   56.39   10.20
   4  14  -1   32.40   14.40
  -4  14   1   43.80   18.20
  -4  14   1   42.50   10.60
  -4  14   1   51.09   10.90
   4  14  -1   65.19   19.70
  -3 -14   1   43.80   10.00
   3 -14  -1   32.50   16.40
   3 -14  -1   37.60   13.70
  -3  14   1   22.50   16.40
  -3  14   1   30.70    9.30
   3  14  -1   36.80   12.90
   3  14  -1   34.30   10.20
   3  14  -1   44.70    7.70
   3  14  -1   20.90   17.30
  -3  14   1   37.20    9.90
  -2 -14   1   -3.30    7.30
   2 -14  -1   17.90   14.20
   2 -14  -1    1.60    6.50
   2 -14  -1   13.10   12.40
  -2  14   1   11.10   11.60
  -2  14   1   -9.50    6.90
   2  14  -1   16.70    9.40
   2  14  -1  -11.30   16.30
  -2  14   1    4.80    8.50
  -2  14   1   11.80    8.20
  -2  14   1    5.00   14.80
   2  14  -1    1.90    6.90
  -1 -14   1  309.07   17.80
   1 -14  -1  311.07   24.50
   1 -14  -1  266.47   25.10
   1 -14  -1  307.27   16.10
   1  14  -1  298.57   20.90
   1  14  -1  320.57   17.20
  -1  14   1  309.67   17.20
   1  14  -1  321.27   29.40
  -1  14   1  293.67   18.30
  -1  14   1  290.37   29.40
   0 -14   1   79.89    9.80
   0 -14  -1   83.59    9.50
   0 -14  -1   81.69   16.60
   0  14  -1   67.89   17.80
   0  14   1   72.29   11.60
   0  14   1   94.79   18.50
   0  14   1   74.69    9.90
   0  14  -1   62.49    9.80
   0  14  -1   68.59    9.40
   0  14   1   77.59   10.30
   1 -14   1  295.27   23.80
  -1 -14  -1  320.97   17.40
  -1 -14  -1  291.77   22.10
  -1  14  -1  328.27   16.70
   1  14   1  310.27   16.80
  -1  14  -1  354.96   29.50
   1  14   1  299.77   18.90
   1  14   1  279.27   28.70
  -1  14  -1  304.27   19.20
   2 -14   1  158.18   20.50
  -2 -14  -1   94.69   11.00
   2  14   1  106.39   12.30
   2  14   1   99.69   15.00
  -2  14  -1   99.09   12.60
  -2  14  -1  137.59   19.30
   2  14   1  105.09   12.20
   2  14   1  102.19   19.00
   2  14   1   90.29   11.80
   3 -14   1   54.99   15.40
  -3 -14  -1   78.09   12.50
  -3 -14  -1   75.19   11.00
   3  14   1   58.59   11.20
   3  14   1   59.79   11.40
   3  14   1   92.89   18.10
  -3  14  -1   72.09   17.80
  -3  14  -1   61.19   11.90
  -4 -14  -1  230.78   17.90
   4 -14   1  220.58   18.60
   4 -14   1  236.38   24.60
  -4 -14  -1  190.28   22.20
   4  14   1  217.48   23.10
   4  14   1  231.28   30.20
  -4  14  -1  205.48   16.40
  -4  14  -1  236.98   28.10
   4  14   1  218.98   20.60
  -4  14  -1  229.88   19.90
   5 -14   1   95.59   14.70
   5 -14   1   86.29   17.60
  -5 -14  -1  138.39   17.90
  -5 -14  -1  110.29   14.00
  -5  14  -1   98.99   19.20
  -5  14  -1   98.09   14.80
   5  14   1  142.59   22.70
   5  14   1  122.39   17.90
   5  14   1  128.19   15.00
   5  14   1  108.29   14.20
  -5  14  -1  104.09   12.60
  -6 -14  -1  497.45   30.00
   6 -14   1  439.06   31.40
  -6 -14  -1  472.95   31.00
   6  14   1  432.56   28.60
  -6  14  -1  513.35   35.30
   6  14   1  414.86   25.70
  -6  14  -1  432.96   25.80
   6  14   1  460.95   39.70
  -7 -14  -1   -8.80   17.80
  -7 -14  -1   -9.20   11.60
   7 -14   1    0.70   18.00
   7 -14   1   20.00   14.90
  -7  14  -1    1.50   14.30
   7  14   1   21.60   15.50
  -7  14  -1   11.90   18.60
   7  14   1   19.60   14.30
   7  14   1    4.10   24.70
   7  14   1   13.40   16.60
  -7  14  -1   13.00   13.30
  -8 -14  -1   20.50   21.30
   8 -14   1   33.80   21.60
   8 -14   1   17.90   16.90
  -8 -14  -1    9.50   13.10
  -8  14  -1    8.20   16.80
   8  14   1   32.40   17.90
   8  14   1    6.10   28.30
   8  14   1   -3.70   16.30
  -8  14  -1    2.30   22.00
   8  14   1   -4.10   18.80
  -8  14  -1    5.00   14.80
  -9 -14  -1   11.60   15.00
   9 -14   1    7.40   23.40
   9 -14   1   13.80   19.90
  -9 -14  -1   24.80   23.70
  -9  14  -1   -1.50   24.00
  -9  14  -1   -2.70   16.40
  -9  14  -1   24.00   25.20
   9  14   1  -13.90   19.40
   9  14   1    7.30   19.60
   9  14   1    4.10   32.30
  10 -14   1   19.10   22.40
 -10 -14  -1   17.70   17.70
 -10 -14  -1   16.70   29.20
  10 -14   1   63.99   28.30
  10  14   1   34.90   22.90
 -10  14  -1    1.70   18.90
 -10  14  -1    6.50   28.70
  10  14   1   12.10   22.50
 -11 -14  -1   76.19   21.60
  11 -14   1  101.39   34.10
  11 -14   1   83.49   27.30
  11  14   1   44.50   25.40
 -11  14  -1   77.09   36.70
  11  14   1   78.39   26.00
 -11  14  -1   65.89   22.10
 -12 -14  -1  -11.80   22.90
  12 -14   1   -9.20   30.20
  12 -14   1  -47.50   39.80
 -12  14  -1   80.59   43.60
  12  14   1  -17.50   28.30
 -12  14  -1  -16.40   24.00
  11 -15  -1   36.80   36.00
 -11 -15   1   51.39   21.80
  11 -15  -1   35.10   29.30
  11  15  -1   12.50   25.80
 -11  15   1   25.60   21.20
 -10 -15   1   -8.50   17.90
  10 -15  -1   28.60   32.40
  10 -15  -1  -46.40   25.30
 -10 -15   1   62.69   28.80
  10  15  -1   53.09   23.10
 -10  15   1  -12.10   18.70
  10  15  -1   39.00   23.80
 -10  15   1   49.80   32.10
   9 -15  -1    4.50   21.70
   9 -15  -1  -33.20   25.70
  -9 -15   1   12.60   16.70
  -9 -15   1   45.50   24.80
   9  15  -1    9.50   19.10
  -9  15   1   -9.40   16.90
   9  15  -1  -19.00   19.80
  -9  15   1   26.60   29.00
  -8 -15   1   86.99   22.00
   8 -15  -1   56.29   23.60
   8 -15  -1    6.30   20.90
  -8 -15   1   -0.60   14.40
   8  15  -1   24.20   19.30
   8  15  -1   21.20   16.90
  -8  15   1   26.10   18.20
   8  15  -1  -23.00   29.60
   8  15  -1   31.30   19.60
  -8  15   1   42.60   16.70
  -8  15   1   44.60   24.80
  -7 -15   1    3.90   18.30
  -7 -15   1   10.70   13.60
   7 -15  -1   44.00   17.00
   7 -15  -1   12.30   20.60
  -7  15   1   34.70   14.00
   7  15  -1   11.30   17.30
  -7  15   1    9.70   15.90
   7  15  -1   10.10   17.30
   7  15  -1    5.50   14.30
   7  15  -1   62.19   29.10
  -7  15   1   23.30   21.80
   6 -15  -1   60.49   16.80
   6 -15  -1   88.09   20.00
  -6 -15   1   72.89   13.50
  -6 -15   1   80.29   16.80
  -6  15   1   70.89   15.10
   6  15  -1   55.49   15.50
   6  15  -1   72.49   13.80
  -6  15   1   65.39   21.10
  -6  15   1   69.39   13.80
   6  15  -1   83.99   18.20
   6  15  -1   37.90   25.00
   5 -15  -1   62.09   17.10
  -5 -15   1   52.59   12.30
   5  15  -1   34.90   11.30
   5  15  -1   55.29   13.80
  -5  15   1   40.20   15.30
  -5  15   1   35.60   11.90
  -5  15   1   21.60   20.00
   5  15  -1   34.30   21.50
   4 -15  -1  347.07   24.70
  -4 -15   1  405.76   22.70
   4 -15  -1  372.36   28.90
  -4  15   1  406.86   34.30
  -4  15   1  378.16   23.10
   4  15  -1  403.56   27.70
  -4  15   1  375.16   21.80
   4  15  -1  366.46   36.00
   4  15  -1  372.66   24.70
   3 -15  -1  146.49   18.60
  -3 -15   1  129.79   15.60
   3  15  -1  147.69   23.50
   3  15  -1  130.59   13.60
  -3  15   1  138.09   14.70
  -3  15   1  152.28   21.50
   3  15  -1  117.09   17.60
  -3  15   1  119.39   17.20
   3  15  -1  108.29   14.00
  -3  15   1  115.69   12.70
   2 -15  -1  200.28   24.70
  -2 -15   1  198.68   17.60
   2 -15  -1  222.28   14.40
   2  15  -1  217.78   18.70
   2  15  -1  192.28   15.70
  -2  15   1  247.28   30.20
  -2  15   1  211.28   17.70
   2  15  -1  251.37   26.10
   1 -15  -1   85.49    9.90
  -1 -15   1  106.59   12.00
   1 -15  -1  114.49   17.00
  -1  15   1   73.69   10.90
   1  15  -1  107.89   11.60
  -1  15   1   90.79   21.20
   1  15  -1   88.59   12.10
  -1  15   1   91.59   14.80
  -1  15   1   98.19   11.90
   1  15  -1   95.79   20.40
   0 -15  -1   43.90    8.90
   0  15  -1   36.10   18.40
   0  15  -1   58.09   10.40
   0  15   1   16.90   17.10
   0  15   1   33.40    9.40
   0  15   1   29.60   16.90
  -1 -15  -1   24.50    9.10
  -1  15  -1   37.90   18.40
   1  15   1   49.60   11.00
   1  15   1   34.40    8.90
  -1  15  -1   58.59   10.50
   1  15   1   50.59   18.90
  -1  15  -1   43.20    9.10
   2 -15   1  113.29   17.50
  -2 -15  -1  116.59   12.20
  -2  15  -1  115.89   21.20
  -2  15  -1  131.69   14.20
   2  15   1  118.29   16.20
   2  15   1  139.59   14.20
   2  15   1  126.29   21.50
  -2  15  -1  107.09   10.40
   2  15   1  150.28   13.80
   2  15   1  139.39   13.50
  -3 -15  -1  394.26   21.30
   3 -15   1  408.76   28.40
   3  15   1  381.56   21.80
  -3  15  -1  360.76   23.50
   3  15   1  390.36   18.80
   3  15   1  413.56   34.70
   3  15   1  335.47   23.70
  -3  15  -1  351.96   33.40
   4 -15   1   97.89   17.00
  -4 -15  -1   47.40   14.70
  -4 -15  -1   26.20   10.20
   4  15   1   49.70   12.50
   4  15   1   33.30   15.50
   4  15   1   20.70   20.00
  -4  15  -1   38.70   11.70
   4  15   1   77.49   13.80
  -4  15  -1   43.30   19.20
  -4  15  -1   36.30   10.60
   5 -15   1  103.39   19.40
  -5 -15  -1  130.69   17.90
  -5 -15  -1  114.99   14.30
  -5  15  -1  108.99   13.60
   5  15   1  126.29   16.30
  -5  15  -1  141.79   21.70
   5  15   1  111.39   25.00
   5  15   1  132.59   15.30
   5  15   1   97.49   27.40
  -6 -15  -1   13.00   17.40
  -6 -15  -1    2.20   10.60
   6 -15   1    6.50   17.40
   6 -15   1    9.30   14.10
  -6  15  -1   15.50   20.40
   6  15   1    0.90   14.90
   6  15   1    6.90   15.90
  -6  15  -1    2.40   13.20
   6  15   1   22.60   24.60
   6  15   1   11.30   13.60
  -6  15  -1   26.80   13.60
   7 -15   1   17.60   16.60
   7 -15   1   -1.30   19.80
  -7 -15  -1   -2.50   12.80
  -7 -15  -1    3.30   19.50
   7  15   1   14.60   14.20
   7  15   1    5.90   17.50
   7  15   1    3.10   17.30
   7  15   1   -3.60   27.30
  -7  15  -1   -2.40   15.80
  -7  15  -1   36.70   14.70
  -7  15  -1   15.40   22.10
   8 -15   1   40.80   19.50
  -8 -15  -1   16.70   15.20
  -8 -15  -1    6.00   22.10
   8 -15   1  -12.80   22.80
   8  15   1   53.59   20.40
  -8  15  -1   56.19   20.00
   8  15   1   22.50   21.70
   8  15   1   39.70   30.30
   8  15   1   34.10   18.30
  -8  15  -1    6.00   16.40
  -8  15  -1   81.19   25.50
   9 -15   1   67.69   22.40
  -9 -15  -1  101.69   26.90
   9 -15   1   79.59   27.70
  -9 -15  -1   66.99   17.80
  -9  15  -1   74.09   20.20
  -9  15  -1   61.59   28.00
   9  15   1   33.10   20.80
   9  15   1   54.79   21.60
  10 -15   1   16.50   32.50
  10 -15   1    8.50   23.60
 -10 -15  -1  -11.30   18.50
 -10 -15  -1  -52.39   27.90
 -10  15  -1  -26.30   19.00
  10  15   1   28.30   23.20
 -10  15  -1   31.40   32.90
  10  15   1    0.00   24.70
  11 -15   1   55.09   28.30
  11 -15   1   -6.80   36.50
 -11 -15  -1   24.70   22.30
  11  15   1   11.60   26.80
 -11  15  -1    5.10   22.20
 -11  15  -1  -35.40   36.70
 -11 -16   1    0.60   23.30
  11 -16  -1  -32.70   38.40
  11 -16  -1   33.40   33.00
 -11  16   1    1.10   23.60
  11  16  -1   20.40   28.50
 -10 -16   1  -23.40   19.80
  10 -16  -1   43.20   29.20
 -10 -16   1   91.39   30.70
  10 -16  -1  -24.30   34.40
  10  16  -1   52.39   28.20
  10  16  -1   20.90   25.70
 -10  16   1    2.20   20.30
   9 -16  -1   18.90   24.30
   9 -16  -1   -3.70   27.70
  -9 -16   1   27.20   18.00
  -9 -16   1   53.49   26.30
  -9  16   1  -17.80   17.60
   9  16  -1   23.90   20.70
   9  16  -1  -18.80   21.60
  -9  16   1  -26.90   30.50
  -8 -16   1    5.50   21.40
  -8 -16   1  -21.00   15.70
   8 -16  -1  -27.60   25.40
   8 -16  -1   17.60   19.90
   8  16  -1  -13.90   17.40
  -8  16   1   -6.80   27.50
   8  16  -1   10.00   20.50
  -8  16   1    4.00   16.10
  -7 -16   1   10.70   19.30
  -7 -16   1   18.80   15.20
   7 -16  -1   41.50   22.50
   7 -16  -1   29.00   19.20
  -7  16   1   17.70   25.80
   7  16  -1    3.20   30.50
   7  16  -1   -2.10   17.70
  -7  16   1   15.70   15.30
   7  16  -1  -23.80   15.10
  -7  16   1    4.40   16.70
   7  16  -1    5.80   17.80
  -6 -16   1  165.78   18.90
  -6 -16   1  158.58   19.60
   6 -16  -1  152.78   19.90
  -6  16   1  154.88   18.60
   6  16  -1  178.28   22.10
   6  16  -1   93.89   28.90
   6  16  -1  168.18   16.90
  -6  16   1  160.98   19.40
  -6  16   1  142.69   25.10
   6  16  -1  153.88   20.20
   5 -16  -1   17.30   15.40
   5 -16  -1   71.69   19.60
  -5 -16   1   40.70   12.70
  -5  16   1   49.70   14.20
   5  16  -1   49.10   15.80
  -5  16   1   54.79   21.60
  -5  16   1   48.10   13.40
   5  16  -1   56.89   26.40
   5  16  -1   46.40   16.70
   4 -16  -1   95.39   18.70
  -4 -16   1  101.89   14.00
  -4  16   1   65.39   21.60
   4  16  -1   89.19   14.70
  -4  16   1  103.59   22.60
  -4  16   1   81.09   13.80
   4  16  -1  108.99   18.40
   4  16  -1   92.79   24.40
  -3 -16   1   11.20   10.30
   3 -16  -1   49.10   17.40
  -3  16   1   36.60   11.30
   3  16  -1    8.90   12.20
  -3  16   1    7.40   20.60
   3  16  -1   65.29   22.10
   3  16  -1   18.80   15.40
   3  16  -1   21.10    9.00
   2 -16  -1   74.79   17.30
  -2 -16   1  100.29   12.70
  -2  16   1   57.29   21.10
   2  16  -1  103.69   11.30
  -2  16   1   70.39   11.30
  -2  16   1   68.49   11.90
   2  16  -1   62.39   12.80
   2  16  -1  114.89   23.80
   1 -16  -1   26.60    8.70
  -1 -16   1   44.00   10.80
   1 -16  -1   19.40   15.20
   1  16  -1   25.50   10.70
  -1  16   1   19.70   10.70
   1  16  -1   13.40    8.90
  -1  16   1   19.60   20.70
  -1  16   1   32.70    9.80
   1  16  -1   17.90   20.00
   0 -16  -1   72.19   10.40
   0  16  -1   65.59   21.10
   0  16  -1   82.39   11.70
   0  16   1   89.39   11.60
   0  16   1   73.29   12.10
   0  16   1   84.49   22.80
   0  16  -1   67.39   10.90
  -1 -16  -1   20.80    9.20
  -1  16  -1   -9.80   19.60
  -1  16  -1   -3.90    9.20
   1  16   1    5.50   10.80
   1  16   1    8.20    8.70
  -1  16  -1   -4.60    9.20
   1  16   1  -22.40   18.00
  -2 -16  -1   15.00    9.50
   2 -16   1   27.70   15.00
  -2  16  -1    8.80    9.40
   2  16   1   26.90   21.00
  -2  16  -1   35.20   20.10
   2  16   1   18.20   11.80
  -2  16  -1    0.70    9.70
   2  16   1   15.40    8.20
   3 -16   1    4.70   15.80
  -3 -16  -1   29.50   10.30
  -3  16  -1   39.40   21.10
   3  16   1   46.10   22.30
   3  16   1   38.80   12.10
   3  16   1   26.60   12.60
  -3  16  -1   33.60   11.40
   4 -16   1  -16.30   16.70
  -4 -16  -1   -4.40    9.60
   4  16   1    6.60   13.20
  -4  16  -1   12.80   20.40
   4  16   1   36.40   16.90
   4  16   1   45.80   23.10
  -4  16  -1   13.30   11.10
  -4  16  -1   27.60   21.20
   5 -16   1  167.48   22.50
  -5 -16  -1  172.98   20.30
  -5 -16  -1  198.68   25.70
  -5  16  -1  179.58   19.30
  -5  16  -1  173.08   25.10
   5  16   1  176.98   21.80
   5  16   1  152.48   18.80
  -5  16  -1  170.78   20.80
   5  16   1  203.58   30.30
   5  16   1  192.28   23.20
  -6 -16  -1  121.59   17.10
   6 -16   1  147.99   23.80
  -6 -16  -1   87.79   20.70
   6 -16   1  124.89   17.90
  -6  16  -1  104.29   16.90
   6  16   1  113.59   21.10
   6  16   1  104.69   16.80
  -6  16  -1  126.79   17.30
  -6  16  -1  105.79   24.20
   6  16   1   88.79   30.30
   6  16   1  112.19   19.80
   7 -16   1   91.79   35.40
  -7 -16  -1   67.29   22.80
  -7 -16  -1  102.59   17.20
   7 -16   1   89.79   19.40
   7  16   1   68.19   17.10
  -7  16  -1   32.70   18.40
   7  16   1   74.79   20.70
   7  16   1  103.89   31.30
  -7  16  -1   51.79   17.50
   7  16   1   75.39   21.40
  -7  16  -1  119.69   26.60
  -8 -16  -1   -4.80   23.70
   8 -16   1  -14.30   18.90
   8 -16   1   47.70   25.70
  -8 -16  -1   26.30   16.80
   8  16   1   24.30   21.70
   8  16   1   11.50   19.00
  -8  16  -1   13.90   26.50
  -8  16  -1   16.20   17.10
  -9 -16  -1   47.80   28.50
   9 -16   1    0.30   22.90
   9 -16   1   14.90   29.20
  -9 -16  -1   25.10   18.10
   9  16   1   30.70   22.80
  -9  16  -1  -19.10   31.60
   9  16   1    2.10   23.80
  -9  16  -1   -0.20   18.30
 -10 -16  -1   28.20   33.50
  10 -16   1   41.10   26.50
  10 -16   1   34.20   33.20
 -10 -16  -1   44.80   20.10
  10  16   1   10.80   25.10
 -10  16  -1   25.50   21.00
 -10  16  -1   50.59   36.00
  11 -16   1   -8.90   30.50
 -11 -16  -1   38.00   24.70
  11 -16   1  -21.20   38.00
  11  16   1  122.89   29.30
 -11  16  -1   55.09   24.90
  10 -17  -1   43.00   31.10
  10 -17  -1   98.19   37.20
 -10 -17   1   19.70   22.60
 -10  17   1   57.39   22.30
  10  17  -1   66.19   26.60
   9 -17  -1  -16.40   32.90
   9 -17  -1  -23.60   24.90
  -9 -17   1    7.90   19.40
  -9 -17   1   23.70   27.90
  -9  17   1    7.60   18.70
   9  17  -1   -1.20   21.10
   9  17  -1  -13.20   23.10
   8 -17  -1   31.40   21.90
  -8 -17   1    9.40   17.30
   8 -17  -1   -5.40   28.20
  -8 -17   1  -49.70   22.90
   8  17  -1   -9.50   17.80
  -8  17   1  -21.10   16.60
   8  17  -1    6.10   22.80
  -8  17   1   45.70   31.20
  -7 -17   1    8.30   15.80
  -7 -17   1   -8.80   20.70
   7 -17  -1  -13.90   25.00
   7 -17  -1   16.10   20.40
   7  17  -1   15.60   16.60
  -7  17   1   18.40   29.50
  -7  17   1    1.10   16.00
   7  17  -1   -6.70   19.90
  -6 -17   1   30.30   14.70
   6 -17  -1   39.40   19.40
   6 -17  -1   35.20   21.90
  -6  17   1   26.70   26.30
   6  17  -1   12.80   14.50
   6  17  -1    0.70   18.50
   6  17  -1  -25.80   29.70
   6  17  -1   19.60   17.60
  -6  17   1   28.10   15.80
  -6  17   1    0.50   15.90
   5 -17  -1  105.09   21.90
  -5 -17   1   91.19   15.90
   5  17  -1   97.09   20.40
   5  17  -1   68.99   29.70
  -5  17   1  106.99   26.10
   5  17  -1   92.59   18.20
  -5  17   1   54.79   15.00
  -5  17   1   72.19   15.80
  -4 -17   1   16.90   14.50
   4 -17  -1  -17.00   22.40
  -4  17   1   36.10   23.00
   4  17  -1   29.60   14.40
  -4  17   1   35.20   18.60
   4  17  -1   -1.30   16.30
  -4  17   1   -5.00   12.20
   4  17  -1    9.70   26.70
  -4  17   1   20.60   13.10
  -3 -17   1  488.55   26.30
   3  17  -1  417.86   27.40
   3  17  -1  415.36   43.50
   3  17  -1  439.76   33.20
  -3  17   1  430.66   24.70
  -3  17   1  445.76   33.60
  -3  17   1  415.96   40.70
  -2 -17   1  161.88   19.10
   2 -17  -1  207.38   26.20
  -2  17   1  159.18   19.00
  -2  17   1  249.58   27.90
   2  17  -1  226.98   21.60
   2  17  -1  173.78   18.20
  -2  17   1  172.88   19.50
   2  17  -1  177.28   29.10
   1 -17  -1  163.48   16.80
   1  17  -1  172.98   17.90
   1  17  -1  159.88   19.80
  -1  17   1  173.08   19.00
   1  17  -1  151.78   26.60
  -1  17   1  165.78   19.70
  -1  17   1  150.18   26.00
   0 -17  -1   40.80   10.20
   0  17   1   76.09   24.70
   0  17  -1   40.50   11.30
   0  17  -1   51.29   23.00
   0  17  -1   47.90   10.90
   0  17   1   40.30   10.70
   0  17   1   31.60   12.30
  -1 -17  -1   90.59   12.00
  -1  17  -1   60.39   24.10
   1  17   1   92.79   14.30
  -1  17  -1   88.69   12.70
   1  17   1   94.29   11.70
  -1  17  -1   87.89   12.30
   1  17   1   52.59   24.00
   2 -17   1  452.55   33.10
  -2 -17  -1  449.46   24.70
  -2  17  -1  401.36   38.90
   2  17   1  460.05   27.30
  -2  17  -1  457.65   25.90
  -2  17  -1  413.36   23.10
   2  17   1  435.06   41.20
   2  17   1  439.56   22.70
  -3 -17  -1   56.19   11.90
   3 -17   1   99.79   19.60
   3  17   1   52.69   10.20
   3  17   1   34.10   25.30
   3  17   1   51.29   14.70
  -3  17  -1   66.49   23.20
  -4 -17  -1  160.68   17.60
   4 -17   1  203.18   24.40
   4  17   1  163.38   30.00
   4  17   1  163.78   19.20
   4  17   1  186.18   23.70
   4  17   1  155.38   16.80
  -4  17  -1  137.19   17.60
  -4  17  -1  178.78   26.80
  -5 -17  -1   69.49   17.40
  -5 -17  -1   10.40   13.00
  -5  17  -1    4.90   14.60
  -5  17  -1   36.80   14.50
  -5  17  -1   63.89   24.70
   5  17   1   29.80   28.30
   5  17   1    4.30   14.40
   5  17   1   53.59   19.20
   5  17   1   46.60   18.60
   6 -17   1   19.30   22.10
   6 -17   1   41.30   17.50
  -6 -17  -1   26.40   14.30
  -6 -17  -1   47.60   21.30
   6  17   1   -0.40   20.70
   6  17   1   24.20   33.10
  -6  17  -1   13.20   25.90
  -6  17  -1   13.40   16.00
  -6  17  -1   -6.90   16.20
   6  17   1   -8.80   18.40
   6  17   1   -5.80   15.90
   7 -17   1   38.10   19.60
   7 -17   1    6.30   24.10
  -7 -17  -1   69.39   23.90
  -7 -17  -1   -8.50   15.00
   7  17   1  -18.90   20.30
  -7  17  -1  -28.10   15.90
  -7  17  -1  -31.60   27.90
   7  17   1   -3.30   17.50
  -8 -17  -1   59.19   26.70
  -8 -17  -1   48.30   18.60
   8 -17   1   32.30   27.80
   8 -17   1   81.19   23.60
  -8  17  -1   38.80   18.70
   8  17   1   81.39   24.30
   8  17   1   18.30   21.00
  -8  17  -1   82.19   32.90
  -9 -17  -1   14.60   29.00
   9 -17   1  -11.70   24.80
  -9 -17  -1  -27.10   18.40
   9 -17   1  -12.70   31.10
   9  17   1   -2.70   25.30
  -9  17  -1  -33.30   34.80
  -9  17  -1   13.30   19.80
   9  17   1    8.10   23.10
  10 -17   1   36.80   30.00
 -10 -17  -1  -15.90   22.40
  10 -17   1   -8.50   34.80
 -10  17  -1   -0.80   22.50
  10  17   1   49.50   27.80
  -9 -18   1   87.99   22.10
   9 -18  -1   65.69   28.70
   9 -18  -1   59.89   36.30
  -9 -18   1  113.69   31.00
  -9  18   1   80.39   22.40
   9  18  -1   -1.90   27.30
  -8 -18   1   19.00   26.80
   8 -18  -1   33.90   25.00
   8 -18  -1   40.90   31.70
  -8 -18   1    6.20   17.70
  -8  18   1   21.50   18.20
   8  18  -1    1.70   20.00
   8  18  -1   57.59   25.20
  -7 -18   1  -39.30   21.70
   7 -18  -1  -13.20   27.40
  -7 -18   1   17.60   17.00
   7 -18  -1   18.60   21.10
   7  18  -1   15.60   18.30
   7  18  -1    3.50   22.40
  -7  18   1   -2.20   31.80
  -7  18   1   10.10   17.20
   6 -18  -1   46.70   23.90
   6 -18  -1   21.40   19.40
  -6 -18   1   24.50   16.40
  -6  18   1  -22.40   15.60
  -6  18   1   17.60   29.40
   6  18  -1   -3.10   19.80
  -5 -18   1   34.70   15.30
   5 -18  -1   51.79   24.00
  -5  18   1   35.00   28.10
  -5  18   1   47.00   23.90
   5  18  -1  -17.10   16.80
   5  18  -1   17.40   20.40
  -5  18   1    3.20   14.80
   4 -18  -1   68.39   21.70
  -4 -18   1   34.10   14.00
   4  18  -1   32.20   30.60
   4  18  -1   86.69   21.60
  -4  18   1   40.50   15.00
  -4  18   1   39.10   15.30
  -4  18   1   22.60   26.00
   4  18  -1   44.50   16.80
   3 -18  -1   84.99   21.20
  -3  18   1   14.20   12.40
   3  18  -1    2.50   28.70
   3  18  -1   59.49   18.90
  -3  18   1   64.89   26.60
   3  18  -1   36.90   14.60
   2 -18  -1   14.50   18.40
  -2 -18   1   11.00   11.50
   2  18  -1   26.40   27.10
   2  18  -1   -8.80    9.90
  -2  18   1   24.80   25.50
   2  18  -1   11.70   13.00
  -1  18   1   36.70   11.30
  -1  18   1  -21.90   24.90
   1  18  -1   23.50   10.50
   1  18  -1   13.20   13.10
   1  18  -1   23.20   26.30
  -1  18   1   26.30   12.50
   0 -18  -1   38.30   11.40
   0  18   1   40.70   26.70
   0  18  -1   74.59   27.30
   0  18   1   40.50   13.60
   0  18  -1   47.40   12.90
   0  18   1   67.89   12.30
   0  18  -1   48.20   12.20
  -1 -18  -1   36.10   11.30
   1  18   1    4.50   25.80
   1  18   1   17.90   13.60
  -1  18  -1    8.40   25.80
  -1  18  -1    9.20   10.60
  -1  18  -1   26.70   12.30
   1  18   1   16.80   10.00
  -2 -18  -1   23.10   11.60
   2  18   1   -6.40   26.20
   2  18   1    1.10   14.10
   2  18   1   10.50   10.10
  -2  18  -1  -12.70   23.40
   3 -18   1   78.99   21.20
  -3 -18  -1   45.60   22.90
   3  18   1   51.59   11.40
  -3  18  -1   66.89   14.70
   3  18   1   63.59   16.40
   3  18   1  104.39   29.40
  -3  18  -1   32.20   26.40
  -4 -18  -1   28.10   13.20
   4 -18   1    7.40   20.10
  -4  18  -1   31.40   15.00
  -4  18  -1   33.40   26.40
   4  18   1   14.60   17.20
   4  18   1   51.59   31.40
   4  18   1   30.70   19.20
   4  18   1   37.10   15.00
   5 -18   1   21.70   22.00
  -5 -18  -1    9.70   14.20
   5  18   1    6.90   15.10
  -5  18  -1   30.00   16.40
  -5  18  -1   16.10   28.10
   5  18   1   15.80   19.30
   5  18   1   40.80   19.50
  -6 -18  -1   98.09   18.30
   6 -18   1   61.29   25.10
  -6 -18  -1   95.29   22.60
   6  18   1   82.99   17.90
   6  18   1   65.79   24.70
  -6  18  -1   22.00   17.80
  -6  18  -1   54.29   31.10
   7 -18   1   10.40   28.30
  -7 -18  -1   -2.20   24.20
  -7 -18  -1   15.40   17.10
   7  18   1  -17.20   22.40
  -7  18  -1   14.60   17.60
   7  18   1    3.70   19.00
  -7  18  -1   46.10   33.00
  -8 -18  -1   19.40   29.10
   8 -18   1   32.20   22.90
   8 -18   1   10.50   30.10
  -8 -18  -1   36.80   18.40
  -8  18  -1   73.49   34.30
   8  18   1   26.00   24.30
  -8  18  -1    0.50   18.90
   8  18   1   24.80   22.90
   9 -18   1  118.09   36.30
  -9 -18  -1  167.68   38.50
   9 -18   1   98.09   29.40
  -9 -18  -1   88.19   23.10
   9  18   1  146.49   30.80
  -9  18  -1  102.09   24.10
   9 -19  -1   21.00   30.70
   8 -19  -1   36.90   33.70
  -8 -19   1   28.90   20.30
   8 -19  -1   -2.60   26.20
  -8 -19   1   35.60   29.30
   8  19  -1  -22.90   27.80
   8  19  -1   65.69   28.70
  -8  19   1   41.40   21.20
  -7 -19   1   50.49   19.30
   7 -19  -1   68.19   30.40
   7 -19  -1   46.70   23.70
  -7  19   1   59.19   20.40
   7  19  -1   25.20   19.70
   7  19  -1   63.29   25.30
  -6 -19   1  130.39   20.90
   6 -19  -1  101.89   31.00
   6  19  -1  114.39   26.00
  -6  19   1   98.99   19.70
  -6  19   1  134.39   58.19
   5 -19  -1   15.20   25.60
  -5 -19   1  -25.60   14.90
   5  19  -1   25.10   29.90
  -5  19   1   23.10   16.10
  -5  19   1  -23.90   30.30
  -5  19   1  -15.80   26.70
   5  19  -1    9.20   21.10
   4 -19  -1    0.20   24.10
  -4 -19   1    7.10   14.20
  -4  19   1   12.20   15.80
   4  19  -1  -16.80   20.40
  -4  19   1   19.70   29.70
   4  19  -1  -28.30   17.10
   3 -19  -1   28.80   22.60
   3  19  -1   19.30   14.90
  -3  19   1   11.00   14.00
   3  19  -1    1.00   20.10
   3  19  -1   10.20   16.30
  -3  19   1   -4.80   29.20
   3  19  -1   23.50   33.30
   3  19  -1   33.80   11.90
   2  19  -1  313.27   37.00
  -2  19   1  354.96   26.20
   2  19  -1  323.07   23.50
  -2  19   1  327.97   27.30
  -2  19   1  341.07   37.70
   2  19  -1  315.07   28.80
   1  19  -1   75.69   30.30
  -1  19   1   76.19   15.70
   1  19  -1  106.79   17.10
   1  19  -1  128.39   15.00
  -1  19   1  134.79   31.40
   0 -19  -1   72.29   13.20
   0  19   1  103.09   13.50
   0  19   1   89.49   15.90
   0  19  -1   51.89   15.00
   0  19  -1   65.69   12.20
   0  19   1  107.09   31.20
   0  19  -1   94.99   32.30
  -1 -19  -1  153.68   16.20
  -1  19  -1  193.78   32.70
   1  19   1  176.08   19.70
  -1  19  -1  134.79   16.50
   1  19   1  150.98   19.20
   1  19   1  165.88   33.50
  -2 -19  -1   54.09   21.00
  -2  19  -1   51.09   14.90
   2  19   1   44.00   30.90
  -2  19  -1   55.39   15.00
   2  19   1   81.49   17.90
  -2  19  -1   49.99   30.90
   2  19   1   61.19   12.30
   3 -19   1   65.69   23.20
  -3 -19  -1   21.20   13.80
  -3  19  -1    8.30   14.40
   3  19   1   52.29   22.70
   3  19   1   14.50   12.50
  -3  19  -1   59.89   30.70
   3  19   1   36.70   18.40
  -4 -19  -1   49.20   15.50
   4 -19   1   58.09   23.30
   4  19   1   71.49   20.50
   4  19   1   70.89   22.20
  -4  19  -1   62.69   31.20
  -4  19  -1   69.99   17.70
  -5 -19  -1  -36.50   14.30
   5 -19   1   25.50   25.30
  -5  19  -1   -6.80   15.50
   5  19   1   54.59   23.20
  -5  19  -1  -34.20   30.80
  -6 -19  -1  -16.90   16.30
   6 -19   1   53.09   27.60
  -6 -19  -1   47.10   23.40
   6  19   1   25.20   22.30
   6  19   1   -5.60   23.80
  -6  19  -1   39.80   33.40
  -6  19  -1    4.50   17.60
  -7 -19  -1   28.00   26.80
  -7 -19  -1   -4.60   18.00
   7 -19   1   28.50   31.60
   7  19   1   34.10   24.70
  -7  19  -1   18.00   40.90
   7  19   1  -13.10   21.60
  -7  19  -1   38.10   20.50
  -8 -19  -1   46.90   21.10
   8 -19   1   16.10   25.30
  -8 -19  -1   41.20   31.30
   8 -19   1   11.20   33.80
  -8  19  -1   64.89   22.90
   8  19   1   51.79   28.30
   8 -20  -1   46.90   29.50
   7 -20  -1   91.39   36.10
  -7 -20   1   35.40   20.70
   7  20  -1   -3.90   27.00
  -7  20   1   80.79   22.60
   6 -20  -1    9.60   30.20
  -6 -20   1   30.70   18.90
   6  20  -1  -16.50   23.60
  -6  20   1   -1.60   33.00
  -6  20   1   -2.10   19.10
   5 -20  -1   35.70   29.10
   5  20  -1    0.90   23.90
  -5  20   1   18.10   18.40
   4 -20  -1   -6.90   26.20
  -4  20   1   -4.00   16.80
   4  20  -1   -5.50   22.20
   4  20  -1   29.60   22.90
   3 -20  -1  -14.70   24.30
  -3  20   1   19.50   15.80
   3  20  -1   11.90   19.90
   3  20  -1   15.50   12.20
   3  20  -1   18.70   21.70
  -2  20   1    2.60   14.20
   2  20  -1   31.60   18.40
   2  20  -1   13.30   11.90
  -1  20   1   -8.70   14.70
   1  20  -1  -16.40   16.40
   1  20  -1   14.40   13.00
  -1  20   1   -1.50   13.20
   0  20   1   40.60   16.20
   0  20   1   44.00   17.10
   0  20  -1   32.80   16.30
   0  20  -1   21.10   17.00
   0  20  -1   84.49   33.70
  -1 -20  -1   57.19   15.10
  -1  20  -1   62.09   14.90
   1  20   1   31.40   12.50
   1  20   1   55.59   18.00
  -1  20  -1   52.29   16.20
  -1  20  -1  137.29   34.70
  -2 -20  -1   77.69   15.80
   2  20   1   44.70   19.60
   2  20   1  105.69   15.20
  -2  20  -1  100.09   17.30
  -2  20  -1   76.39   16.30
  -2  20  -1   85.49   34.10
  -3 -20  -1   32.30   16.10
  -3  20  -1   45.90   17.40
   3  20   1   24.50   23.40
  -3  20  -1  -21.70   32.90
   3  20   1   28.40   13.10
   3  20   1   14.90   21.00
   4 -20   1   49.20   26.80
  -4 -20  -1   30.80   17.00
   4  20   1   54.69   25.10
  -4  20  -1   21.00   17.50
   4  20   1  -17.30   33.60
  -4  20  -1   75.79   37.10
   5 -20   1   59.69   30.50
  -5 -20  -1   20.70   17.80
   5  20   1   77.99   25.80
  -5  20  -1   63.19   19.70
   6 -20   1  128.19   33.50
  -6 -20  -1   59.49   20.00
   6  20   1   81.59   28.60
   6  20   1   47.80   21.10
  -6  20  -1   63.99   20.80
  -7 -20  -1   24.70   20.70
   7 -20   1   50.89   32.50
   7  20   1   27.90   28.70
  -7  20  -1  -50.39   20.10
   6 -21  -1   71.39   35.30
   6  21  -1   26.40   29.00
  -6  21   1   67.49   21.80
   5 -21  -1   23.70   31.80
   5  21  -1  127.39   29.20
  -5  21   1   23.60   19.40
   4 -21  -1   18.10   29.50
   4  21  -1   22.70   25.20
  -4  21   1    4.50   18.00
   3  21  -1   23.00   23.60
  -3  21   1  -21.40   16.60
   3  21  -1   -0.90   21.40
  -2  21   1   75.09   19.00
   2  21  -1   57.99   20.70
   2  21  -1   30.10   24.40
   2  21  -1   38.90   14.40
   2  21  -1   54.09   21.70
  -1  21   1  123.09   21.30
  -1  21   1  126.39   17.80
   1  21  -1  144.89   17.80
   1  21  -1  100.39   21.70
   0  21   1   48.70   14.90
   0  21  -1   21.80   18.20
   0  21   1   37.90   19.90
   0  21  -1   44.00   15.20
   1  21   1   92.19   15.50
  -1  21  -1   55.29   16.90
   1  21   1   55.59   21.40
  -1  21  -1   31.90   18.00
  -2 -21  -1   67.79   16.90
   2  21   1   68.59   15.20
  -2  21  -1   22.40   17.20
   2  21   1   60.69   23.30
  -2  21  -1   83.99   18.90
  -3 -21  -1   14.50   17.30
   3  21   1   41.50   14.30
   3  21   1   36.00   25.50
   3  21   1    8.60   25.50
  -3  21  -1    6.80   17.20
  -4 -21  -1  -17.40   17.60
  -4  21  -1   52.39   19.50
   4  21   1  -20.20   25.60
  -5 -21  -1    7.80   18.60
   5 -21   1  -20.10   30.90
   5  21   1    7.30   26.40
  -5  21  -1   25.70   19.70
   6 -21   1  -53.69   33.30
  -6 -21  -1   34.60   21.30
  -6  21  -1   -2.50   21.40
   6  21   1  -65.99   29.40
   5 -22  -1    4.60   33.70
  -5  22   1   45.30   21.90
   5  22  -1    9.70   30.90
   4 -22  -1   67.19   31.30
   4  22  -1   11.20   27.10
  -4  22   1   33.80   20.90
   3  22  -1   56.99   28.00
   3  22  -1  -12.20   16.10
  -3  22   1   44.10   19.40
   2  22  -1    7.80   15.20
   2  22  -1   10.20   23.10
  -2  22   1    5.20   16.90
   2  22  -1   -1.70   23.20
   2  22  -1  -45.90   25.50
   1  22  -1    6.00   14.40
   1  22  -1   12.20   23.20
   1  22  -1   26.70   24.50
  -1  22   1    9.00   16.60
  -1  22   1    9.70   22.60
   0  22   1   45.70   17.10
   0  22   1   38.00   22.70
   0  22  -1   49.70   22.60
   0  22  -1   69.09   18.00
   1  22   1   67.09   16.00
   1  22   1   14.10   24.70
  -1  22  -1   94.19   19.00
  -1  22  -1   15.50   21.50
   2  22   1  118.19   27.00
  -2  22  -1  132.89   21.70
   2  22   1  134.49   18.60
  -3 -22  -1   23.50   19.50
   3  22   1   30.70   28.00
  -3  22  -1   69.69   20.60
  -4 -22  -1   64.99   20.40
  -4  22  -1   15.70   20.80
   4  22   1   45.70   30.00
  -5 -22  -1  125.09   24.30
  -5  22  -1  105.39   23.50
   5  22   1  102.39   31.90
   2  23  -1  113.89   31.70
  -2  23   1   77.59   20.60
   2  23  -1   70.29   18.40
   2  23  -1   60.39   29.10
   1  23  -1  -54.59   26.70
   1  23  -1   14.60   17.20
  -1  23   1  -37.50   25.40
   1  23  -1   29.10   26.00
  -1  23   1   -8.00   18.20
   0  23  -1  -72.89   24.70
   0  23   1  -10.60   17.30
   0  23  -1    1.80   17.20
   0  23   1   -7.20   27.20
   1  23   1  -15.70   25.30
  -1  23  -1   21.20   19.70
   1  23   1   32.10   18.40
  -1  23  -1   -6.10   23.50
   2  23   1   92.09   32.50
  -2  23  -1   51.19   21.50
   2  23   1   67.89   19.40
 -15   0   2   70.59   40.70
  15   0  -2  130.69   34.60
  15   0  -2   85.19   31.40
  15   0  -2  109.69   31.40
  14   0  -2   -7.10   23.70
  14   0  -2   11.30   27.40
 -14   0   2   -5.50   37.50
 -14   0   2   16.00   31.20
  14   0  -2  -33.80   24.00
  13   0  -2    4.50   20.60
 -13   0   2    5.60   28.40
 -13   0   2  -24.10   26.30
  13   0  -2  -32.90   18.80
  13   0  -2   11.50   21.40
  12   0  -2   -8.50   17.00
 -12   0   2   -6.90   22.60
 -12   0   2  -19.90   20.40
  12   0  -2   14.10   16.50
  12   0  -2   11.20   15.90
 -11   0   2   14.80   19.70
 -11   0   2   41.80   18.20
  11   0  -2    9.40   13.30
  11   0  -2   29.30   20.80
  11   0  -2   13.50   15.30
  10   0  -2    2.50   10.70
 -10   0   2   14.00   13.30
 -10   0   2    4.70   14.60
  10   0  -2   10.60   12.60
  10   0  -2   14.60    9.80
  -9   0   2   84.19   15.40
   9   0  -2   63.89   12.30
   9   0  -2   71.59   12.80
   9   0  -2   94.09    9.90
  -9   0   2   69.29   13.30
  -9   0   2   85.19    8.80
  -8   0   2 1525.65   50.69
   8   0  -2 1558.14   50.69
  -8   0   2 1460.55   51.09
  -8   0   2 1507.25   46.70
  -8   0   2 1492.35   47.70
   8   0  -2 1438.96   47.20
   8   0  -2 1556.94   50.79
  -7   0   2 1425.16   47.00
   7   0  -2 1388.96   46.00
  -7   0   2 1514.35   48.00
   7   0  -2 1453.45   47.30
   7   0  -2 1448.76   47.50
  -7   0   2 1433.26   45.00
  -7   0   2 1411.36   44.20
   7   0  -2 1412.76   44.60
  -6   0   2  454.75   16.90
  -6   0   2  452.05   17.40
   6   0  -2  459.45   19.60
  -6   0   2  460.55   20.30
  -6   0   2  478.65   20.40
   6   0  -2  467.75   17.70
   6   0  -2  471.05   19.80
  -5   0   2  158.78    8.90
   5   0  -2  164.78    9.30
  -5   0   2  172.68    8.70
  -5   0   2  161.98   11.80
   5   0  -2  161.88   11.20
  -5   0   2  179.58   11.90
   5   0  -2  170.08   10.70
   5   0  -2  174.78   11.20
  -4   0   2 1993.10   58.59
   4   0  -2 1922.21   58.79
   4   0  -2 1971.80   57.59
  -4   0   2 1925.61   58.89
  -4   0   2 1966.50   57.19
   4   0  -2 1958.60   57.29
  -3   0   2  651.83   22.20
   3   0  -2  673.43   20.70
   3   0  -2  682.83   22.10
  -3   0   2  677.73   21.70
   3   0  -2  627.34   22.00
   3   0  -2  668.13   20.70
  -2   0   2  448.86   14.90
   2   0  -2  455.25   15.20
  -2   0   2  435.06   14.10
   2   0  -2  454.15   14.10
  -2   0   2  440.16   15.30
   2   0  -2  425.66   15.30
  -1   0   2 8206.08  241.88
   1   0  -2 8805.82  241.18
  -1   0  -2 6446.46  181.48
  -1   0  -2 6395.26  181.08
   1   0   2 6337.37  181.08
   1   0   2 6335.67  181.08
  -1   0  -2 6309.97  180.98
   1   0   2 6459.75  181.58
   2   0   2  657.13   20.40
  -2   0  -2  658.23   20.30
   2   0   2  669.03   21.30
  -2   0  -2  670.33   21.30
  -2   0  -2  630.64   19.90
  -2   0  -2  603.34   20.90
   2   0   2  646.34   20.40
   3   0   2 2531.55   73.49
  -3   0  -2 2598.34   74.79
  -3   0  -2 2532.45   73.19
   3   0   2 2466.75   73.49
  -3   0  -2 2446.46   73.59
   3   0   2 2646.64   74.39
  -3   0  -2 2533.65   73.49
   4   0   2  808.52   26.50
  -4   0  -2  816.02   25.70
  -4   0  -2  863.11   28.30
   4   0   2  818.62   26.30
  -4   0  -2  772.12   26.80
  -4   0  -2  835.12   26.30
   4   0   2  870.71   27.40
  -5   0  -2 1671.73   51.99
   5   0   2 1688.63   50.29
  -5   0  -2 1577.44   50.39
   5   0   2 1592.24   49.60
  -5   0  -2 1624.94   49.60
  -5   0  -2 1662.43   50.29
   5   0   2 1702.93   51.09
  -5   0  -2 1639.14   49.20
  -6   0  -2  145.99   14.30
  -6   0  -2  133.79   12.60
   6   0   2  143.99   11.00
  -6   0  -2  145.19   11.20
   6   0   2  153.88   12.10
  -6   0  -2  134.59    9.40
  -6   0  -2  150.78   11.10
   6   0   2  143.89   11.30
  -7   0  -2   53.69    9.80
   7   0   2   47.70    8.60
  -7   0  -2   42.00    7.40
  -7   0  -2   46.50    6.50
   7   0   2   27.60    7.30
  -7   0  -2   54.09    8.10
  -7   0  -2   41.00   11.00
   7   0   2   33.10    8.80
  -8   0  -2   17.40   11.10
   8   0   2  -10.70    8.70
   8   0   2    7.80    8.10
  -8   0  -2  -16.70   10.70
  -8   0  -2    1.90    5.70
  -8   0  -2   25.60    8.40
  -8   0  -2   16.60    7.60
   8   0   2   10.80    9.00
   9   0   2   31.60   10.00
   9   0   2   28.30   10.70
  -9   0  -2   23.20   13.50
  -9   0  -2   28.10    8.50
   9   0   2   32.40   10.40
  -9   0  -2   27.80   13.80
  -9   0  -2   28.90    7.50
  10   0   2    2.00   11.70
 -10   0  -2    7.40    9.30
  10   0   2   -7.80   12.70
  10   0   2   18.00   12.30
 -10   0  -2   13.20   15.80
 -10   0  -2  -24.70   12.40
 -10   0  -2    9.30    8.30
 -10   0  -2   -3.00   15.10
 -11   0  -2  154.78   17.20
 -11   0  -2  165.78   18.50
  11   0   2  144.19   17.60
  11   0   2  170.18   18.90
  11   0   2  170.08   18.90
 -11   0  -2  184.08   26.60
 -11   0  -2  119.59   22.20
  12   0   2  242.58   23.90
  12   0   2  294.97   29.50
  12   0   2  319.47   29.40
 -12   0  -2  270.17   31.10
 -12   0  -2  328.07   23.00
 -12   0  -2  306.57   30.20
 -13   0  -2   12.40   30.40
 -13   0  -2   50.79   16.00
  13   0   2   45.80   22.80
 -13   0  -2   30.80   29.70
  13   0   2   43.20   21.00
 -14   0  -2   80.69   18.80
  14   0   2   70.99   27.80
  14   0   2    6.70   29.10
  14   0   2    7.20   24.20
 -14   0  -2   78.09   39.00
 -14   0  -2   12.60   38.50
  15   0   2   21.20   32.90
 -15   0  -2  -23.10   46.00
  15   0   2  -14.40   42.10
  15   0   2  -45.70   35.90
  15  -1  -2   44.40   32.70
  15  -1  -2   85.69   33.10
  15   1  -2   89.49   33.60
 -15   1   2   20.10   40.30
  15   1  -2  181.98   34.00
  15   1  -2   54.19   31.60
 -14  -1   2  -19.90   32.30
  14  -1  -2   50.99   28.00
  14  -1  -2  -29.90   23.90
  14   1  -2   23.20   24.80
  14   1  -2   -6.90   24.90
 -14   1   2  -63.69   31.90
 -14   1   2  -12.40   33.90
  14   1  -2    4.70   27.20
  13  -1  -2    4.90   19.30
 -13  -1   2  -13.40   29.40
  13  -1  -2   11.10   21.10
  13  -1  -2   57.39   23.40
  13   1  -2   12.50   21.80
  13   1  -2   -5.00   19.60
 -13   1   2   18.20   28.90
  13   1  -2   20.10   19.50
 -13   1   2    1.30   26.50
  12  -1  -2   74.79   18.70
 -12  -1   2   25.30   20.70
  12  -1  -2   91.29   19.80
 -12  -1   2   73.39   23.60
  12  -1  -2   61.69   16.40
 -12   1   2   83.79   22.70
  12   1  -2   44.90   17.30
  12   1  -2   56.19   16.80
 -12   1   2   39.40   21.40
  12   1  -2   56.49   33.30
 -11  -1   2  165.18   21.10
  11  -1  -2  233.58   23.70
  11  -1  -2  150.28   15.30
  11  -1  -2  172.18   19.20
 -11  -1   2  171.78   23.60
 -11   1   2  185.38   17.90
 -11   1   2  185.58   21.00
  11   1  -2  129.49   16.20
  11   1  -2  172.58   22.00
  11   1  -2  179.28   22.70
 -11   1   2  173.28   22.00
  10  -1  -2   21.00   10.00
  10  -1  -2   20.00   13.10
 -10  -1   2  -26.70   12.90
 -10  -1   2   28.20   16.60
  10   1  -2   11.00   11.60
 -10   1   2   18.90    8.90
  10   1  -2   10.00   12.70
  10   1  -2   14.60   12.00
 -10   1   2   25.00   15.20
 -10   1   2  -16.70   13.60
   9  -1  -2  271.77   20.80
  -9  -1   2  253.77   16.20
  -9  -1   2  273.47   24.20
   9  -1  -2  233.38   18.80
  -9  -1   2  260.67   21.50
   9  -1  -2  238.78   15.80
  -9   1   2  292.17   21.10
   9   1  -2  279.47   17.10
   9   1  -2  270.77   19.60
  -9   1   2  269.37   23.20
  -9   1   2  255.67   15.60
   9   1  -2  254.57   19.20
  -8  -1   2  474.35   27.40
  -8  -1   2  448.86   22.90
   8  -1  -2  475.75   22.50
  -8  -1   2  422.66   19.60
   8  -1  -2  443.26   22.60
   8  -1  -2  416.76   18.90
   8   1  -2  430.06   20.00
  -8   1   2  483.25   23.10
   8   1  -2  453.45   22.40
  -8   1   2  451.35   18.90
   8   1  -2  477.65   22.80
  -8   1   2  450.15   24.10
   7  -1  -2    9.20    6.90
   7  -1  -2    6.90    8.40
   7  -1  -2  -15.60    8.20
  -7  -1   2    8.10    8.90
   7  -1  -2   -4.50    5.60
  -7  -1   2  -11.70    5.50
  -7  -1   2   -4.20    8.00
  -7   1   2    7.10    8.00
  -7   1   2  -12.80    8.70
  -7   1   2    4.70    5.20
   7   1  -2    3.70    7.20
   7   1  -2   -9.10    5.90
   7   1  -2   -1.50    7.40
   6  -1  -2  138.49   12.20
   6  -1  -2  158.98    9.50
   6  -1  -2  140.79   12.90
  -6  -1   2  138.59    9.90
  -6  -1   2  156.68   13.40
   6  -1  -2  126.79   12.60
  -6  -1   2  159.78   13.10
   6   1  -2  153.78   10.70
  -6   1   2  171.28   12.70
   6   1  -2  159.88   12.40
  -6   1   2  152.48   13.30
   6   1  -2  183.48   12.70
  -6   1   2  149.59    9.90
   5  -1  -2 1327.27   39.60
   5  -1  -2 1311.87   41.30
  -5  -1   2 1318.17   42.20
  -5  -1   2 1286.87   40.50
   5  -1  -2 1331.97   42.00
  -5  -1   2 1353.36   41.90
   5  -1  -2 1295.37   41.90
   5   1  -2 1184.98   43.60
  -5   1   2 1375.36   42.00
   5   1  -2 1319.47   40.30
  -5   1   2 1334.17   42.00
  -5   1   2 1312.37   40.30
   5   1  -2 1331.17   42.00
  -4  -1   2 2061.69   60.99
   4  -1  -2 2088.69   61.49
  -4  -1   2 2018.60   60.29
   4  -1  -2 2011.30   61.19
   4  -1  -2 2045.20   59.29
   4  -1  -2 2025.10   60.49
  -4  -1   2 1977.00   61.39
  -4   1   2 2110.59   61.19
   4   1  -2 2073.79   61.39
   4   1  -2 2070.39   59.99
   4   1  -2 2033.30   61.19
  -4   1   2 2000.60   59.99
  -4   1   2 2001.40   61.09
   3  -1  -2 3189.28   91.99
  -3  -1   2 2994.90   92.59
   3  -1  -2 3287.37   92.69
  -3  -1   2 3154.78   91.99
  -3  -1   2 3255.27   92.29
   3  -1  -2 3185.78   91.19
   3   1  -2 3216.78   91.79
  -3   1   2 3170.88   92.49
   3   1  -2 3191.98   92.69
  -3   1   2 3220.58   92.49
  -3   1   2 3148.89   91.79
   3   1  -2 3203.08   92.39
   2  -1  -2  554.34   18.50
   2  -1  -2  535.55   17.50
   2  -1  -2  580.24   17.70
   2  -1  -2  554.04   18.50
  -2  -1   2  553.94   18.50
   2   1  -2  561.64   17.70
   2   1  -2  533.65   18.40
   2   1  -2  564.14   17.90
  -2   1   2  560.54   18.40
  -2   1   2  561.14   18.30
   1  -1  -2 1793.02   51.59
  -1  -1   2 1755.72   51.29
   1  -1  -2 1751.42   51.49
   1  -1  -2 1788.22   51.89
   1  -1  -2 1823.02   52.39
  -1  -1   2 1789.62   51.79
   1   1  -2 1748.43   51.59
  -1   1   2 1821.62   52.29
   1   1  -2 1754.42   51.39
   1   1  -2 1790.82   51.69
  -1   1   2 1752.82   51.59
  -1   1   2 1851.51   51.69
  -1   1   2 1825.22   51.89
   1  -1   2 1884.71   56.59
   1  -1   2 2010.40   56.59
  -1  -1  -2 1997.50   56.69
   1  -1   2 1962.50   56.69
  -1  -1  -2 1928.41   56.39
  -1  -1  -2 1983.90   57.39
   1   1   2 1992.10   56.79
  -1   1  -2 1994.60   56.79
   1   1   2 1929.21   56.49
  -1   1  -2 1900.51   56.59
  -1   1  -2 1976.70   56.69
   1   1   2 1988.20   57.29
  -2  -1  -2  521.95   16.80
   2  -1   2  542.65   17.50
  -2  -1  -2  528.35   17.00
  -2  -1  -2  535.65   18.40
   2  -1   2  509.05   16.90
  -2  -1  -2  525.65   17.30
  -2   1  -2  511.95   16.80
  -2   1  -2  551.84   17.80
   2   1   2  531.65   16.70
  -2   1  -2  517.95   17.30
   2   1   2  530.65   17.20
   2   1   2  537.05   18.20
   2   1   2  519.45   17.30
  -3  -1  -2 4050.39  110.99
  -3  -1  -2 3850.41  111.19
   3  -1   2 3652.43  111.79
   3  -1   2 3982.10  111.89
  -3  -1  -2 4105.09  112.79
  -3  -1  -2 3794.12  111.69
   3  -1   2 3855.81  110.99
   3   1   2 3670.23  113.49
  -3   1  -2 4037.60  112.19
  -3   1  -2 3722.73  111.49
   3   1   2 3986.10  111.49
   3   1   2 3836.12  111.39
  -3   1  -2 3844.42  111.39
  -3   1  -2 3849.51  111.09
   4  -1   2 2487.55   71.79
  -4  -1  -2 2330.17   70.49
  -4  -1  -2 2524.45   72.69
   4  -1   2 2331.77   70.29
  -4  -1  -2 2473.55   70.39
  -4  -1  -2 2349.26   71.49
  -4   1  -2 2428.86   72.09
  -4   1  -2 2387.56   70.89
   4   1   2 2405.86   70.89
   4   1   2 2527.65   71.99
  -4   1  -2 2402.46   69.89
  -4   1  -2 2339.87   70.79
  -5  -1  -2    3.10    5.90
   5  -1   2    8.40    5.50
  -5  -1  -2    6.90    6.60
   5  -1   2    2.80    4.80
   5  -1   2    1.90    5.40
  -5  -1  -2    2.50    3.80
  -5   1  -2   -0.30    5.40
  -5   1  -2    7.90    6.50
  -5   1  -2    1.20    3.40
   5   1   2    7.00    5.20
   5   1   2    3.70    5.30
  -5   1  -2    3.30    5.60
   5   1   2   13.80    5.40
  -5   1  -2    1.20    5.00
   6  -1   2   20.00    5.90
  -6  -1  -2   12.90    5.20
  -6  -1  -2   14.90    8.40
  -6  -1  -2   10.60    7.60
   6  -1   2   13.40    6.90
   6  -1   2   17.20    6.70
  -6   1  -2   21.90    6.30
  -6   1  -2   20.00    7.10
  -6   1  -2   18.10    4.90
  -6   1  -2   24.80    6.40
   6   1   2   17.70    6.60
   6   1   2   32.00    6.40
  -6   1  -2   16.40    7.90
   6   1   2   21.70    7.50
   7  -1   2  546.05   21.90
  -7  -1  -2  515.85   25.60
  -7  -1  -2  592.44   22.00
   7  -1   2  597.74   24.20
  -7  -1  -2  543.65   21.20
  -7  -1  -2  594.34   25.00
   7  -1   2  596.74   23.00
   7   1   2  599.64   22.90
  -7   1  -2  598.44   23.90
  -7   1  -2  551.14   25.40
  -7   1  -2  558.24   22.70
   7   1   2  577.54   23.00
  -7   1  -2  579.54   22.60
   7   1   2  553.14   24.00
  -7   1  -2  582.14   20.60
  -8  -1  -2 1278.67   46.20
  -8  -1  -2 1294.77   45.10
  -8  -1  -2 1273.07   41.30
   8  -1   2 1224.78   41.80
   8  -1   2 1286.07   44.20
   8  -1   2 1255.07   43.30
  -8   1  -2 1258.77   42.20
   8   1   2 1307.27   43.40
  -8   1  -2 1261.37   42.60
  -8   1  -2 1258.67   40.40
  -8   1  -2 1322.07   46.40
   8   1   2 1266.27   44.20
   8   1   2 1319.07   42.80
  -8   1  -2 1301.17   44.10
   9  -1   2   51.79   11.80
  -9  -1  -2   62.09    9.10
   9  -1   2   57.39   10.90
   9  -1   2   56.69   11.70
  -9  -1  -2   71.99   14.70
  -9   1  -2   98.49   10.80
  -9   1  -2  114.49   14.50
  -9   1  -2   85.99   11.90
  -9   1  -2   66.79    8.30
   9   1   2   90.19   12.40
  -9   1  -2   78.79   15.20
   9   1   2   69.09   11.80
   9   1   2   61.49   11.60
 -10  -1  -2   24.10    9.00
 -10  -1  -2   60.79   17.20
 -10  -1  -2   31.60   16.50
  10  -1   2   25.80   12.10
  10  -1   2   35.80   12.60
  10  -1   2   22.80   13.80
 -10   1  -2   45.60   11.00
  10   1   2   19.80   12.40
  10   1   2   24.70   12.90
 -10   1  -2   32.60    8.50
 -10   1  -2   21.40   15.90
 -10   1  -2   45.90   13.00
  10   1   2   33.00   16.00
 -10   1  -2   38.80   16.10
 -11  -1  -2  319.77   34.00
 -11  -1  -2  312.37   33.30
  11  -1   2  344.77   26.60
  11  -1   2  274.37   25.90
 -11  -1  -2  313.07   21.00
  11  -1   2  348.47   26.50
 -11   1  -2  326.77   32.60
 -11   1  -2  338.37   23.20
  11   1   2  339.97   25.40
  11   1   2  297.47   25.60
 -11   1  -2  325.27   19.60
 -11   1  -2  280.67   32.30
  11   1   2  340.07   28.20
 -11   1  -2  325.37   35.40
 -12  -1  -2   74.99   24.50
  12  -1   2   35.20   19.20
  12  -1   2   69.49   19.50
 -12  -1  -2   11.20   26.60
 -12  -1  -2   54.29   13.10
  12  -1   2   52.29   18.50
 -12   1  -2   71.99   20.50
  12   1   2   37.50   18.30
 -12   1  -2   37.80   23.50
 -12   1  -2   51.29   26.10
 -12   1  -2   57.09   12.90
  12   1   2   34.30   19.30
  12   1   2   48.60   18.50
 -13  -1  -2    2.40   31.30
  13  -1   2  -12.20   26.20
  13  -1   2   41.80   23.50
 -13  -1  -2    9.10   30.80
  13  -1   2   -8.60   19.60
 -13  -1  -2    6.90   14.50
 -13   1  -2  -28.70   28.60
  13   1   2  -24.10   22.80
 -13   1  -2   27.80   29.60
  13   1   2    1.30   20.60
  13   1   2  -15.80   23.50
 -14  -1  -2   -9.60   38.00
  14  -1   2  -58.09   26.30
  14  -1   2   35.40   24.30
  14  -1   2    2.00   27.20
 -14  -1  -2   36.40   40.50
 -14  -1  -2   17.70   18.90
  14   1   2  -13.40   23.60
 -14   1  -2   40.30   37.60
  14   1   2   -5.60   29.80
  14   1   2  -18.40   25.60
 -14   1  -2  -34.50   36.50
  15  -1   2   30.90   33.20
  15  -1   2   -0.10   30.00
 -15   1  -2   15.10   50.29
  15   1   2  -32.30   38.50
  15   1   2   52.59   32.70
  15  -2  -2   61.69   34.20
  15  -2  -2   -2.50   31.40
  15   2  -2  -47.50   30.20
 -15   2   2  112.99   42.90
  15   2  -2   10.70   34.60
  15   2  -2   22.60   31.30
  14  -2  -2   26.80   25.00
 -14  -2   2   70.99   33.60
  14  -2  -2   21.50   28.70
 -14   2   2   82.29   36.30
 -14   2   2   -9.50   31.00
  14   2  -2   -1.20   26.00
  14   2  -2   45.00   26.10
  14   2  -2  -12.00   25.10
 -13  -2   2   36.30   26.20
  13  -2  -2   30.30   22.30
 -13  -2   2   35.50   30.60
  13  -2  -2   13.20   20.60
 -13   2   2   25.10   29.10
 -13   2   2   38.20   15.40
 -13   2   2   20.70   25.80
  13   2  -2  -21.60   21.60
  13   2  -2   28.50   21.00
 -13   2   2   47.70   20.70
  13   2  -2   35.60   19.80
  12  -2  -2  193.88   22.60
 -12  -2   2  148.79   25.10
 -12  -2   2  223.48   28.00
  12  -2  -2  208.58   22.80
 -12   2   2  191.48   25.50
  12   2  -2  167.68   20.60
  12   2  -2  167.78   20.00
 -12   2   2  236.18   22.00
 -12   2   2  198.48   25.70
  12   2  -2  161.58   35.00
  11  -2  -2   64.79   17.10
 -11  -2   2   96.39   19.30
 -11  -2   2   55.39   21.20
  11  -2  -2   61.79   12.60
  11  -2  -2   65.79   16.10
  11   2  -2   49.80   14.70
 -11   2   2   97.29   18.90
 -11   2   2   88.89   12.30
  11   2  -2   63.09   14.50
  11   2  -2   81.89   16.00
 -10  -2   2   61.49   11.10
 -10  -2   2   43.10   15.40
 -10  -2   2   62.99   18.60
  10  -2  -2   69.09   14.60
  10  -2  -2   65.79   13.80
  10  -2  -2   85.69   10.60
 -10   2   2   62.29   16.00
  10   2  -2   45.60   13.30
  10   2  -2   60.49   12.80
 -10   2   2   90.99   15.80
  10   2  -2   56.19   11.90
 -10   2   2   77.39   10.80
   9  -2  -2  321.57   21.10
   9  -2  -2  285.67   22.00
  -9  -2   2  312.07   22.40
  -9  -2   2  304.07   17.70
  -9  -2   2  307.17   25.40
  -9   2   2  311.47   24.00
   9   2  -2  329.87   20.40
   9   2  -2  341.57   18.80
  -9   2   2  281.77   17.00
   9   2  -2  320.57   21.30
  -9   2   2  261.77   21.40
  -8  -2   2 1251.57   41.40
   8  -2  -2 1237.38   43.70
   8  -2  -2 1200.58   39.20
  -8  -2   2 1259.77   44.00
   8  -2  -2 1203.68   43.70
  -8   2   2 1215.58   43.80
  -8   2   2 1226.88   40.70
   8   2  -2 1277.37   43.40
   8   2  -2 1331.67   43.50
   8   2  -2 1240.38   41.10
  -8   2   2 1236.28   43.30
  -7  -2   2  778.92   31.50
   7  -2  -2  752.72   30.70
  -7  -2   2  868.71   31.10
   7  -2  -2  769.62   26.50
   7  -2  -2  805.72   30.60
  -7  -2   2  808.02   28.50
   7  -2  -2  790.82   30.60
   7   2  -2  844.22   30.40
  -7   2   2  865.41   28.30
   7   2  -2  824.22   30.40
  -7   2   2  825.92   30.80
   7   2  -2  790.72   28.50
  -7   2   2  855.51   30.60
   6  -2  -2   49.40    9.10
   6  -2  -2   57.59    8.20
   6  -2  -2   55.19    8.40
  -6  -2   2   64.19    8.80
  -6  -2   2   54.29    9.10
  -6  -2   2   49.30    6.70
   6   2  -2   70.29    8.20
  -6   2   2   70.59    9.00
   6   2  -2   55.39    8.30
  -6   2   2   65.79    6.80
   6   2  -2   47.30    7.20
  -6   2   2   76.19    9.10
   5  -2  -2  524.35   20.80
  -5  -2   2  505.25   19.20
  -5  -2   2  552.14   21.70
   5  -2  -2  519.65   20.90
   5  -2  -2  554.54   21.00
  -5  -2   2  546.85   20.60
  -5   2   2  511.95   20.70
  -5   2   2  551.34   20.50
   5   2  -2  544.25   20.90
   5   2  -2  515.25   19.10
  -5   2   2  526.45   19.10
   5   2  -2  544.75   20.70
  -4  -2   2 2904.61   86.79
  -4  -2   2 2992.80   87.19
  -4  -2   2 2872.01   87.99
   4  -2  -2 3084.99   87.89
   4  -2  -2 3013.00   87.79
   4  -2  -2 3031.50   87.29
  -4   2   2 2904.31   87.29
  -4   2   2 2923.21   86.69
   4   2  -2 3026.90   86.59
  -4   2   2 3057.09   87.39
   4   2  -2 2869.31   87.09
   4   2  -2 2986.00   87.59
   3  -2  -2  504.25   17.60
   3  -2  -2  497.05   18.10
  -3  -2   2  504.55   17.20
  -3  -2   2  513.45   18.30
   3  -2  -2  524.05   18.10
  -3   2   2  507.25   17.20
   3   2  -2  526.65   18.00
  -3   2   2  497.55   17.70
   3   2  -2  481.55   17.30
  -3   2   2  494.45   17.90
   3   2  -2  500.15   17.00
   2  -2  -2   27.60    4.90
   2  -2  -2   25.80    4.40
  -2  -2   2   28.00    3.80
  -2  -2   2   26.80    4.60
   2  -2  -2   23.40    3.80
   2   2  -2   32.60    3.80
  -2   2   2   22.80    4.50
  -2   2   2   27.00    4.30
   2   2  -2   28.70    4.40
   2   2  -2   28.30    3.60
  -2   2   2   29.40    3.90
  -1  -2   2 1008.60   28.60
   1  -2  -2 1006.80   30.10
   1  -2  -2  971.70   29.10
  -1  -2   2 1005.70   28.30
   1  -2  -2  979.30   28.70
  -1  -2   2  972.80   29.40
  -1   2   2  973.30   28.70
   1   2  -2  981.70   28.60
   1   2  -2  979.10   28.40
  -1   2   2  954.90   29.70
   1   2  -2  846.72   30.00
  -1   2   2  970.60   29.90
   0  -2  -2 9676.33  270.67
   0   2  -2 9516.35  269.97
   0   2   2 9619.84  270.67
   0   2   2 9280.97  270.77
   0   2  -2 9565.64  270.17
   1  -2   2  205.98    8.20
  -1  -2  -2  207.18    7.80
  -1  -2  -2  214.78    8.70
  -1  -2  -2  213.38    9.80
   1  -2   2  214.28    7.90
  -1   2  -2  220.08    8.90
   1   2   2  225.28    8.70
   1   2   2  219.68    9.50
  -1   2  -2  214.38    7.90
  -1   2  -2  202.38    8.20
   1   2   2  205.28    7.90
   1   2   2  203.38    9.70
  -2  -2  -2 1234.58   36.80
  -2  -2  -2 1243.78   38.00
   2  -2   2 1228.18   36.70
   2  -2   2 1131.79   36.30
   2   2   2 1239.78   37.40
   2   2   2 1283.07   37.10
   2   2   2 1240.18   37.80
  -2   2  -2 1258.87   37.00
  -3  -2  -2  303.57   11.80
  -3  -2  -2  307.17   13.20
   3  -2   2  325.17   12.40
  -3  -2  -2  320.57   14.10
   3  -2   2  304.07   11.90
  -3   2  -2  301.77   12.70
   3   2   2  307.07   12.30
  -3   2  -2  301.87   11.60
   3   2   2  303.47   12.30
   3   2   2  325.27   13.70
   4  -2   2   56.69    6.60
  -4  -2  -2   63.59    7.70
   4  -2   2   36.60    5.40
  -4  -2  -2   56.79    5.30
  -4  -2  -2   46.80    6.40
   4   2   2   51.69    5.70
  -4   2  -2   59.29    7.00
  -4   2  -2   49.70    5.90
   4   2   2   50.59    5.60
  -4   2  -2   58.99    6.80
   5  -2   2   10.30    5.00
  -5  -2  -2    7.10    7.70
   5  -2   2    5.50    5.80
  -5  -2  -2    4.40    4.30
  -5  -2  -2    6.50    6.60
   5  -2   2    0.70    5.00
   5   2   2    6.50    5.10
  -5   2  -2    5.60    6.00
   5   2   2   -1.00    5.10
  -5   2  -2   -0.30    6.50
  -5   2  -2   10.00    3.40
   5   2   2    1.50    5.60
  -5   2  -2    0.00    5.60
  -6  -2  -2  626.14   21.90
  -6  -2  -2  617.04   26.00
  -6  -2  -2  610.14   24.50
   6  -2   2  600.04   23.50
  -6   2  -2  599.24   22.90
   6   2   2  589.74   22.70
   6   2   2  644.24   23.20
  -6   2  -2  575.74   23.20
  -6   2  -2  606.64   24.70
   6   2   2  600.64   23.60
  -6   2  -2  575.64   20.30
   7  -2   2   -1.60    6.70
  -7  -2  -2   -2.90    9.50
   7  -2   2   -1.60    7.10
  -7  -2  -2    0.90    9.00
  -7  -2  -2   -6.50    5.60
   7  -2   2   -3.80    7.50
   7   2   2   -3.50    7.90
  -7   2  -2    0.20    8.70
  -7   2  -2   10.70    7.20
   7   2   2    7.00    7.10
   7   2   2   10.70    8.40
  -7   2  -2    2.20    7.60
  -7   2  -2    7.20    4.60
   8  -2   2  157.58   14.20
  -8  -2  -2  130.79   16.00
  -8  -2  -2  155.48   19.40
  -8  -2  -2  155.98   12.60
   8  -2   2  120.99   15.80
   8  -2   2  137.19   15.60
  -8   2  -2  179.68   15.40
  -8   2  -2  167.08   15.40
   8   2   2  154.18   15.50
   8   2   2  189.28   16.40
  -8   2  -2  148.79   15.60
   8   2   2  153.98   16.00
  -8   2  -2  148.29   17.10
   9  -2   2   13.20    9.70
  -9  -2  -2   14.20    7.60
   9  -2   2   -2.20   10.30
  -9  -2  -2    6.90   14.10
   9  -2   2   11.00   10.80
  -9  -2  -2   21.50   14.40
  -9   2  -2   16.10    9.50
  -9   2  -2   -0.40   12.80
   9   2   2  -12.90   10.30
  -9   2  -2   14.80   12.00
   9   2   2   29.40   11.70
  -9   2  -2    8.10   10.70
  -9   2  -2   -1.30    6.10
   9   2   2   -6.40   10.20
  10  -2   2   77.19   14.80
  10  -2   2  109.49   15.90
 -10  -2  -2  131.89   15.60
 -10  -2  -2  122.19   19.60
 -10  -2  -2  114.99   19.10
 -10   2  -2   89.39    9.90
  10   2   2  104.89   15.50
 -10   2  -2  115.39   17.20
  10   2   2  120.49   15.20
 -10   2  -2  110.49   16.90
 -10   2  -2  113.59   13.00
  10   2   2   99.39   14.60
 -10   2  -2  104.29   25.90
 -11  -2  -2  132.49   23.90
  11  -2   2  131.99   19.20
 -11  -2  -2  118.39   13.80
  11  -2   2  105.29   17.50
 -11  -2  -2  130.49   23.60
 -11   2  -2  118.39   15.00
 -11   2  -2  145.09   15.40
  11   2   2  119.79   16.90
  11   2   2  120.99   17.10
 -11   2  -2  122.89   18.00
  11   2   2  143.79   18.20
 -11   2  -2  113.09   21.60
 -11   2  -2  134.19   22.90
 -12  -2  -2   82.89   26.80
 -12  -2  -2   78.89   14.10
 -12  -2  -2  107.79   27.00
  12  -2   2   50.99   19.60
  12  -2   2   35.00   17.70
  12   2   2   51.79   17.00
 -12   2  -2   36.90   11.70
 -12   2  -2   73.39   15.20
  12   2   2   84.09   18.50
 -12   2  -2   59.09   23.70
 -12   2  -2   18.60   20.50
 -12   2  -2   31.80   24.90
  12   2   2   52.39   20.40
  13  -2   2   77.79   23.30
  13  -2   2   70.69   22.10
 -13  -2  -2   17.70   31.50
 -13  -2  -2   33.70   32.80
 -13  -2  -2   46.60   15.80
  13   2   2   33.00   21.00
 -13   2  -2  118.09   30.60
  13   2   2   58.99   24.40
 -13   2  -2   93.69   28.90
  13   2   2   56.29   21.50
 -13   2  -2   93.49   17.10
 -13   2  -2   43.40   24.10
 -14  -2  -2  -34.40   39.10
 -14  -2  -2  -29.80   38.80
  14  -2   2  -56.39   35.50
 -14  -2  -2   15.50   20.50
  14  -2   2   29.30   28.40
 -14   2  -2    3.20   36.20
 -14   2  -2   34.60   19.30
  14   2   2   57.39   25.20
 -14   2  -2   27.20   38.20
  14   2   2    6.30   25.90
  14   2   2   33.90   31.00
  15  -2   2   15.70   30.70
  15  -2   2  221.48   37.10
 -15   2  -2   92.19   51.89
  15   2   2  131.59   32.90
  15   2   2   91.39   41.10
  15   2   2   69.09   32.00
  15  -3  -2  114.39   32.60
  15  -3  -2  175.68   38.10
 -15   3   2   62.59   44.60
  15   3  -2   92.69   36.60
  15   3  -2  201.68   33.30
 -15   3   2   44.60   32.50
  15   3  -2   75.59   32.50
  14  -3  -2   81.29   30.40
  14  -3  -2   63.59   26.50
 -14  -3   2   80.39   37.10
  14   3  -2   56.69   25.50
  14   3  -2   33.70   27.40
 -14   3   2   49.90   35.20
 -14   3   2   85.59   33.10
 -14   3   2   39.40   25.70
  14   3  -2   56.79   25.40
 -14   3   2   86.29   18.60
 -13  -3   2  112.09   33.70
  13  -3  -2   67.09   22.10
 -13  -3   2   97.09   27.80
  13  -3  -2  131.29   25.70
 -13   3   2   77.29   26.70
 -13   3   2  136.59   17.00
  13   3  -2  102.99   22.10
 -13   3   2  150.68   30.60
  13   3  -2  118.89   22.20
  13   3  -2  121.19   23.80
 -12  -3   2  464.75   43.40
  12  -3  -2  533.75   35.60
  12  -3  -2  418.36   33.90
 -12  -3   2  518.95   39.00
 -12   3   2  489.95   27.50
  12   3  -2  473.65   31.80
 -12   3   2  549.95   38.50
 -12   3   2  444.76   37.80
  12   3  -2  385.96   31.20
  12   3  -2  425.86   31.30
 -11  -3   2   21.90   18.10
 -11  -3   2   40.00   20.90
  11  -3  -2   62.19   17.40
  11  -3  -2   22.10   14.80
  11   3  -2   36.30   14.20
  11   3  -2   70.99   16.00
 -11   3   2   45.60   12.00
  11   3  -2   37.90   14.50
 -11   3   2   40.80   17.80
 -11   3   2   72.89   19.10
  10  -3  -2   28.10   13.70
 -10  -3   2   27.30   15.20
  10  -3  -2    1.70   13.90
 -10  -3   2    1.40   10.10
 -10  -3   2   26.20   17.30
  10   3  -2   25.00   12.60
 -10   3   2    4.00   13.90
  10   3  -2    9.30   12.50
  10   3  -2    9.70   11.30
 -10   3   2   41.40   15.70
 -10   3   2   33.80    9.90
  -9  -3   2   21.10   13.90
   9  -3  -2   34.90   11.00
  -9  -3   2   18.50   12.10
  -9  -3   2    6.80    8.60
   9  -3  -2   11.90   12.20
  -9   3   2   21.80    8.90
  -9   3   2   20.10   10.90
   9   3  -2    4.30   10.00
   9   3  -2    2.70   11.10
   9   3  -2   20.60   10.20
  -9   3   2    8.50   12.70
  -8  -3   2  401.36   24.60
   8  -3  -2  389.86   22.60
  -8  -3   2  415.06   23.50
  -8  -3   2  361.16   19.00
   8  -3  -2  408.06   24.50
   8  -3  -2  445.76   22.10
  -8   3   2  424.86   19.20
   8   3  -2  364.76   19.80
   8   3  -2  369.36   21.50
  -8   3   2  413.06   23.10
   8   3  -2  426.36   21.70
  -8   3   2  430.86   22.20
  -7  -3   2   54.49    8.20
   7  -3  -2   65.49    9.90
  -7  -3   2   54.29   10.50
   7  -3  -2   62.09    9.80
  -7  -3   2   61.49   11.40
   7  -3  -2   65.39   11.20
   7   3  -2   78.29    9.80
  -7   3   2   83.59   10.50
   7   3  -2   53.89    8.50
   7   3  -2   72.89    9.90
  -7   3   2   72.79    8.20
  -7   3   2   81.59   10.70
  -6  -3   2  176.88   11.30
  -6  -3   2  162.98   13.80
   6  -3  -2  178.48   12.90
   6  -3  -2  158.48   13.70
   6  -3  -2  139.99   14.70
  -6   3   2  162.88   13.10
   6   3  -2  203.78   13.10
   6   3  -2  159.58   11.70
  -6   3   2  141.89   10.90
   6   3  -2  165.38   13.80
   5  -3  -2  170.68   12.60
   5  -3  -2  212.68   12.50
   5  -3  -2  199.08   13.60
  -5  -3   2  191.48   10.90
  -5  -3   2  191.58   13.40
  -5  -3   2  203.28   12.70
  -5   3   2  189.28   12.90
  -5   3   2  196.88   12.40
   5   3  -2  184.68   11.90
  -5   3   2  193.58   10.90
   5   3  -2  189.78   10.90
   5   3  -2  196.38   12.60
   4  -3  -2  642.44   22.30
   4  -3  -2  596.34   22.30
   4  -3  -2  651.13   22.60
  -4  -3   2  615.94   21.30
  -4  -3   2  629.94   23.00
   4   3  -2  605.04   21.50
  -4   3   2  630.64   21.80
   4   3  -2  632.64   22.20
  -4   3   2  581.04   21.20
   4   3  -2  621.04   21.10
  -4   3   2  605.34   22.10
   3  -3  -2  416.86   15.60
   3  -3  -2  382.76   15.70
   3  -3  -2  421.86   15.50
  -3  -3   2  394.16   16.10
  -3  -3   2  391.86   14.60
   3   3  -2  388.16   14.40
  -3   3   2  394.76   15.20
  -3   3   2  400.96   15.60
   3   3  -2  408.76   14.50
  -3   3   2  399.86   14.80
   3   3  -2  415.76   15.60
   2  -3  -2   15.60    4.10
  -2  -3   2   22.80    3.60
   2  -3  -2   23.40    4.20
   2  -3  -2   12.20    4.50
  -2  -3   2   19.00    3.50
  -2  -3   2   20.30    4.70
   2   3  -2   19.90    3.50
  -2   3   2   20.20    3.80
  -2   3   2   19.90    4.10
   2   3  -2   25.30    4.50
  -2   3   2   14.70    4.60
   2   3  -2   20.60    3.40
  -1  -3   2  872.11   25.50
   1  -3  -2  853.91   25.50
  -1  -3   2  829.12   27.10
   1  -3  -2  877.31   27.40
   1  -3  -2  860.71   26.40
   1  -3  -2  860.01   27.50
  -1   3   2  839.32   27.10
  -1   3   2  841.12   25.60
   1   3  -2  868.91   26.10
  -1   3   2  851.61   26.30
   1   3  -2  842.42   25.60
   1   3  -2  840.72   26.70
  -1   3   2  846.02   27.40
   0  -3  -2 1745.63   51.89
   0  -3  -2 1638.04   52.39
   0  -3  -2 1815.12   53.39
   0   3   2 1755.72   53.09
   0   3  -2 1900.71   51.99
   0   3  -2 1727.73   52.49
   0   3   2 1801.62   53.29
   0   3   2 1890.51   51.99
   1  -3   2  711.93   21.90
  -1  -3  -2  696.63   21.50
   1  -3   2  698.93   21.20
  -1  -3  -2  715.93   23.40
  -1  -3  -2  745.03   22.20
   1  -3   2  687.23   22.50
   1   3   2  704.53   23.30
  -1   3  -2  686.13   22.50
  -1   3  -2  698.03   21.90
   1   3   2  727.73   23.60
  -1   3  -2  734.93   21.40
   1   3   2  733.33   22.50
   1   3   2  697.43   21.60
   2  -3   2  846.12   31.90
   2  -3   2 1006.40   30.40
  -2  -3  -2 1020.80   32.20
  -2  -3  -2 1062.49   30.80
   2   3   2 1049.00   31.00
   2   3   2 1072.89   31.90
  -2   3  -2  974.20   30.50
  -2   3  -2 1009.70   30.40
   3  -3   2 3518.15  103.49
  -3  -3  -2 3600.34  103.49
  -3  -3  -2 3668.43  104.89
   3  -3   2 3533.25  103.49
   3   3   2 3782.52  104.59
  -3   3  -2 3582.64  104.69
  -3   3  -2 3501.25  103.09
   3   3   2 3520.45  104.29
  -3   3  -2 3506.95  103.49
   3   3   2 3577.64  103.69
  -4  -3  -2 1617.84   48.80
   4  -3   2 1581.44   47.10
  -4  -3  -2 1501.25   48.20
  -4  -3  -2 1528.15   46.60
   4  -3   2 1470.15   46.60
  -4   3  -2 1525.65   47.10
   4   3   2 1488.75   46.80
   4   3   2 1527.75   47.30
  -4   3  -2 1523.65   48.10
  -4   3  -2 1535.25   46.30
   4   3   2 1598.24   47.80
   5  -3   2  928.71   30.60
  -5  -3  -2  879.41   29.70
  -5  -3  -2  885.01   31.70
  -5  -3  -2  944.41   32.80
   5  -3   2  852.51   30.00
  -5   3  -2  898.91   31.40
  -5   3  -2  905.71   29.70
   5   3   2  897.51   30.20
   5   3   2  922.81   30.60
  -5   3  -2  939.81   31.00
   5   3   2  890.81   31.70
   6  -3   2  313.97   16.30
  -6  -3  -2  298.57   19.20
  -6  -3  -2  339.47   15.10
   6   3   2  345.87   16.40
   6   3   2  325.97   16.20
  -6   3  -2  342.07   17.00
  -6   3  -2  320.47   17.40
   6   3   2  338.07   16.70
  -6   3  -2  341.47   16.50
  -7  -3  -2 1444.06   50.29
  -7  -3  -2 1470.65   47.00
   7  -3   2 1476.15   48.10
  -7  -3  -2 1474.15   51.09
   7  -3   2 1521.35   48.70
   7   3   2 1538.25   48.00
  -7   3  -2 1455.45   48.40
   7   3   2 1471.15   48.70
  -7   3  -2 1493.35   47.90
   7   3   2 1453.15   48.10
  -7   3  -2 1472.05   49.40
  -8  -3  -2 1580.04   56.09
  -8  -3  -2 1589.64   51.19
   8  -3   2 1667.53   53.99
  -8  -3  -2 1570.64   55.59
   8  -3   2 1537.95   52.89
  -8   3  -2 1635.14   54.79
  -8   3  -2 1626.54   52.69
   8   3   2 1611.34   53.69
   8   3   2 1585.44   52.89
  -8   3  -2 1641.54   52.99
   8   3   2 1661.63   52.79
   9  -3   2   17.30   11.80
  -9  -3  -2   14.60    8.40
  -9  -3  -2   12.70   16.10
   9  -3   2   21.40   11.10
  -9  -3  -2   17.80   15.00
  -9   3  -2   25.30   12.20
   9   3   2   34.40   11.00
  -9   3  -2   25.40   13.90
  -9   3  -2   21.90   10.10
   9   3   2   30.30   12.30
   9   3   2   32.60   12.00
  -9   3  -2   28.70   11.50
  10  -3   2   28.30   14.80
 -10  -3  -2  -10.60   17.70
  10  -3   2   15.50   12.80
 -10  -3  -2    6.50   17.60
 -10  -3  -2   -1.50    9.40
 -10   3  -2   28.80   15.60
  10   3   2   13.70   12.80
 -10   3  -2   22.40   17.00
  10   3   2   -4.60   13.50
 -10   3  -2   30.50   14.10
  10   3   2   -2.40   11.70
 -10   3  -2  -12.80   10.80
 -11  -3  -2   15.30   11.70
 -11  -3  -2   84.59   21.30
  11  -3   2   28.00   17.80
 -11  -3  -2   39.10   22.40
  11  -3   2   19.00   15.60
  11   3   2   46.60   15.30
 -11   3  -2   58.19   20.40
  11   3   2   28.90   17.20
 -11   3  -2   14.80   18.60
 -11   3  -2   42.50   16.60
 -11   3  -2    8.30   13.50
  11   3   2   40.30   15.10
 -12  -3  -2  104.79   27.50
  12  -3   2  146.89   22.10
  12  -3   2  111.39   19.80
 -12  -3  -2  163.48   29.20
 -12  -3  -2  135.99   16.00
 -12   3  -2  100.89   24.60
 -12   3  -2  137.59   21.60
  12   3   2  138.79   20.10
 -12   3  -2  136.59   16.80
  12   3   2  168.68   22.10
  12   3   2  192.18   21.10
 -12   3  -2  130.49   25.50
 -13  -3  -2    6.80   16.70
  13  -3   2   44.70   21.60
 -13  -3  -2   18.00   32.00
  13  -3   2    0.10   23.50
 -13   3  -2   20.40   16.60
 -13   3  -2  -34.30   29.20
 -13   3  -2  -37.90   27.50
  13   3   2   -7.30   24.30
  13   3   2  -31.90   19.90
  13   3   2  -12.00   20.50
 -13   3  -2  -43.50   23.90
 -14  -3  -2   60.89   39.30
  14  -3   2   38.90   29.50
  14  -3   2  -10.50   25.90
 -14  -3  -2    4.90   20.20
 -14  -3  -2   43.90   39.00
  14   3   2   38.20   25.70
  14   3   2   71.39   32.40
 -14   3  -2   13.10   39.90
 -14   3  -2    0.30   19.00
 -14   3  -2   70.19   32.00
  14   3   2   33.00   26.20
 -14   3  -2  -18.30   36.00
  15  -3   2   50.69   33.10
  15  -3   2   27.90   36.70
 -15  -3  -2   61.39   26.10
 -15   3  -2   60.29   25.00
  15   3   2   -3.50   32.40
 -15   3  -2  -33.00   61.19
  15   3   2   43.30   38.40
  15   3   2   42.70   31.70
 -15   3  -2   95.49   50.49
  15  -4  -2    1.50   36.20
  15  -4  -2  -23.50   33.00
  15   4  -2   30.70   31.50
 -15   4   2  -45.40   44.10
 -15   4   2  -79.19   33.40
  15   4  -2  -79.99   42.20
  15   4  -2   27.30   32.00
 -15   4   2  -38.00   21.20
  14  -4  -2   34.90   30.80
 -14  -4   2    3.00   33.70
  14  -4  -2  -28.90   26.60
 -14   4   2   33.30   19.10
 -14   4   2   60.09   27.40
  14   4  -2  -19.00   25.70
 -14   4   2   25.90   34.00
 -14   4   2   53.89   32.00
  14   4  -2   17.20   28.50
  14   4  -2  -55.59   24.20
  13  -4  -2   -7.20   20.70
 -13  -4   2   21.90   28.60
  13  -4  -2   49.70   25.40
 -13  -4   2   23.50   34.10
  13   4  -2   18.50   20.50
 -13   4   2   16.80   28.00
 -13   4   2   29.00   14.70
  13   4  -2   65.69   22.10
 -13   4   2    9.50   26.60
  13   4  -2   23.80   21.90
 -12  -4   2  110.69   23.70
 -12  -4   2   86.09   28.60
  12  -4  -2  137.79   23.50
  12  -4  -2   92.89   19.40
 -12   4   2   72.59   22.20
  12   4  -2   73.09   18.60
 -12   4   2  132.09   16.60
  12   4  -2   62.99   18.40
 -12   4   2  129.89   24.50
  12   4  -2   78.19   19.10
 -11  -4   2  377.76   38.10
  11  -4  -2  452.75   31.90
  11  -4  -2  394.46   30.10
 -11  -4   2  415.26   25.10
 -11  -4   2  414.76   32.70
  11   4  -2  406.06   27.70
 -11   4   2  427.86   33.00
  11   4  -2  385.76   28.00
 -11   4   2  426.86   25.60
 -11   4   2  416.16   32.20
  11   4  -2  381.56   28.30
  10  -4  -2   78.79   15.30
 -10  -4   2   59.19   11.70
 -10  -4   2   58.59   16.80
  10  -4  -2   61.99   15.40
 -10  -4   2   42.70   18.80
 -10   4   2   74.09   16.40
  10   4  -2   57.39   13.60
  10   4  -2  120.49   14.60
 -10   4   2   70.49   15.80
  10   4  -2   63.79   13.90
 -10   4   2   92.49   12.30
  -9  -4   2  277.97   23.40
  -9  -4   2  248.38   18.00
  -9  -4   2  238.58   26.30
   9  -4  -2  273.77   21.10
   9  -4  -2  249.38   22.60
  -9   4   2  283.87   23.70
   9   4  -2  263.57   20.10
  -9   4   2  231.88   21.40
   9   4  -2  259.67   20.80
   9   4  -2  258.87   20.00
  -9   4   2  283.77   17.80
   8  -4  -2  365.26   25.30
   8  -4  -2  387.86   21.70
  -8  -4   2  426.76   19.60
  -8  -4   2  431.26   25.70
  -8  -4   2  392.26   23.20
   8  -4  -2  364.46   23.00
   8   4  -2  390.66   21.40
  -8   4   2  396.46   19.20
   8   4  -2  348.37   22.70
   8   4  -2  454.95   22.70
  -8   4   2  369.06   26.60
  -8   4   2  391.66   21.90
  -7  -4   2  121.49   15.30
   7  -4  -2  129.09   14.00
  -7  -4   2  145.69   12.00
   7  -4  -2  118.59   12.50
  -7  -4   2  137.59   17.70
   7  -4  -2  152.38   14.20
  -7   4   2  135.49   14.60
   7   4  -2  128.89   15.70
   7   4  -2  150.58   13.90
  -7   4   2  135.19   11.60
   7   4  -2  129.49   12.80
  -7   4   2  119.69   13.90
   6  -4  -2  137.79   15.30
  -6  -4   2  164.28   13.90
   6  -4  -2  193.48   13.30
   6  -4  -2  143.59   13.80
  -6  -4   2  160.88   11.30
  -6  -4   2  171.18   15.10
   6   4  -2  169.08   13.50
  -6   4   2  163.88   11.40
   6   4  -2  162.48   12.00
  -6   4   2  151.08   13.70
   6   4  -2  185.78   12.90
  -6   4   2  165.98   13.00
   5  -4  -2  345.67   16.70
   5  -4  -2  324.67   17.40
  -5  -4   2  372.86   17.90
  -5  -4   2  304.77   18.40
  -5  -4   2  329.37   14.80
   5  -4  -2  343.57   16.00
  -5   4   2  334.37   15.70
  -5   4   2  338.97   16.40
   5   4  -2  318.77   15.50
  -5   4   2  323.07   14.90
   5   4  -2  343.37   16.10
   5   4  -2  321.07   14.90
   4  -4  -2  841.82   29.10
  -4  -4   2  856.01   28.30
   4  -4  -2  850.31   29.50
   4  -4  -2  884.61   29.80
  -4  -4   2  880.21   30.10
   4   4  -2  874.61   29.20
   4   4  -2  874.71   28.20
  -4   4   2  832.92   29.10
   4   4  -2  844.92   28.00
  -4   4   2  824.82   28.30
  -4   4   2  861.21   28.50
   3  -4  -2 1300.87   40.20
  -3  -4   2 1288.97   40.70
  -3  -4   2 1287.87   39.40
  -3  -4   2 1251.97   38.80
   3  -4  -2 1253.97   40.50
   3  -4  -2 1302.27   40.10
   3   4  -2 1285.47   39.10
   3   4  -2 1264.27   38.60
  -3   4   2 1263.37   39.50
  -3   4   2 1242.98   39.40
   3   4  -2 1285.57   40.20
  -3   4   2 1285.47   40.20
  -2  -4   2   11.40    3.50
  -2  -4   2    8.00    3.20
  -2  -4   2   12.60    5.00
   2  -4  -2   11.60    4.20
   2  -4  -2    8.10    4.00
   2  -4  -2    4.90    4.20
  -2   4   2    4.80    4.90
  -2   4   2   14.10    4.10
   2   4  -2    8.60    3.10
  -2   4   2   12.20    3.50
   2   4  -2    8.60    3.20
   2   4  -2    7.60    4.00
   1  -4  -2  441.16   16.50
   1  -4  -2  467.45   15.90
   1  -4  -2  465.35   14.50
   1  -4  -2  448.16   17.20
  -1  -4   2  448.46   15.40
   1   4  -2  456.45   14.80
  -1   4   2  440.06   17.30
  -1   4   2  439.16   16.40
  -1   4   2  443.66   14.70
  -1   4   2  463.45   15.50
   1   4  -2  452.85   15.20
   1   4  -2  424.66   16.30
   0  -4  -2 1035.70   31.50
   0  -4  -2 1028.60   33.20
   0  -4  -2 1104.99   31.20
   0   4  -2 1001.70   32.60
   0   4   2 1087.59   31.40
   0   4   2 1044.30   33.40
   0   4   2  999.60   32.70
   0   4  -2 1047.30   31.30
   0   4   2 1011.20   31.40
  -1  -4  -2   12.60    3.20
   1  -4   2   15.20    4.10
  -1  -4  -2   14.80    3.10
  -1  -4  -2   15.00    4.50
   1   4   2   12.20    3.80
  -1   4  -2   10.10    3.40
   1   4   2   16.80    5.10
   1   4   2   11.60    4.70
  -1   4  -2   11.30    4.20
   2  -4   2   24.60    3.60
  -2  -4  -2   27.50    3.80
   2  -4   2   24.30    4.70
  -2   4  -2   22.90    3.80
  -2   4  -2   19.30    5.20
  -2   4  -2   28.20    4.90
   2   4   2   28.30    5.40
   2   4   2   22.70    4.20
   3  -4   2  455.85   17.30
   3  -4   2  480.15   16.50
  -3  -4  -2  482.05   16.80
  -3  -4  -2  453.05   18.80
  -3   4  -2  454.95   16.60
  -3   4  -2  443.26   17.00
  -3   4  -2  478.65   18.80
   3   4   2  473.55   17.20
   3   4   2  477.15   18.10
   3   4   2  482.25   18.00
  -4  -4  -2  338.87   16.80
   4  -4   2  316.37   14.30
   4  -4   2  303.77   13.50
  -4  -4  -2  326.57   13.60
   4   4   2  318.37   14.00
  -4   4  -2  310.27   14.00
  -4   4  -2  307.27   13.80
  -4   4  -2  305.47   15.40
   4   4   2  347.57   16.00
   4   4   2  325.07   14.80
  -5  -4  -2  205.78   11.60
  -5  -4  -2  200.88   15.60
   5  -4   2  192.58   11.90
   5  -4   2  183.88   12.90
  -5  -4  -2  177.48   14.50
   5   4   2  199.08   12.30
  -5   4  -2  190.98   12.90
  -5   4  -2  204.98   12.10
   5   4   2  209.18   14.50
   5   4   2  199.68   12.50
  -5   4  -2  213.18   13.80
  -6  -4  -2   11.70    9.50
  -6  -4  -2   17.60    5.60
   6  -4   2   15.30    6.90
  -6  -4  -2   19.20    9.00
   6  -4   2    4.50    7.00
  -6   4  -2   14.90    7.20
  -6   4  -2   21.60    7.60
   6   4   2   19.70    7.60
  -6   4  -2   15.30    7.80
   6   4   2   14.10    6.70
   6   4   2   15.90    6.80
   7  -4   2  190.88   15.50
   7  -4   2  181.68   14.80
  -7  -4  -2  206.88   18.80
  -7  -4  -2  181.48   13.40
  -7  -4  -2  205.88   19.60
  -7   4  -2  183.08   15.30
   7   4   2  224.98   14.90
   7   4   2  176.48   15.40
  -7   4  -2  186.28   16.50
   7   4   2  187.38   15.40
  -7   4  -2  177.98   15.20
   8  -4   2   25.40    9.80
   8  -4   2   28.20   10.60
  -8  -4  -2   37.60    7.90
  -8  -4  -2   32.70   16.90
  -8  -4  -2   58.59   13.80
  -8   4  -2   41.60    9.80
  -8   4  -2   41.80   12.50
   8   4   2   46.40   10.60
   8   4   2   31.00   13.20
   8   4   2   38.50   10.30
  -8   4  -2   42.30   11.20
  -9  -4  -2  326.17   19.20
   9  -4   2  320.77   22.00
  -9  -4  -2  341.07   26.90
   9  -4   2  284.67   22.60
  -9  -4  -2  349.47   28.50
  -9   4  -2  340.27   21.60
  -9   4  -2  318.77   22.90
  -9   4  -2  289.67   24.90
   9   4   2  343.17   23.50
   9   4   2  334.47   21.90
   9   4   2  305.37   21.80
 -10  -4  -2   44.70   19.00
 -10  -4  -2  -11.30   17.20
 -10  -4  -2    1.10    9.40
  10  -4   2   -0.90   14.90
  10  -4   2   33.50   13.60
 -10   4  -2   35.80   12.90
  10   4   2   -7.10   14.30
  10   4   2    1.90   12.40
 -10   4  -2   33.20   15.30
 -10   4  -2    5.10   16.70
 -10   4  -2   31.60   13.70
  10   4   2    7.80   13.20
  11  -4   2   23.80   18.70
 -11  -4  -2   15.20   23.20
 -11  -4  -2   29.40   11.90
 -11  -4  -2   39.10   22.40
  11  -4   2   29.20   15.90
 -11   4  -2   26.00   14.00
  11   4   2   66.19   15.40
 -11   4  -2   32.60   18.40
  11   4   2   41.30   18.40
 -11   4  -2   57.99   17.40
  11   4   2   31.40   16.10
 -11   4  -2   59.99   21.50
  12  -4   2   38.80   18.20
  12  -4   2   75.19   22.70
 -12  -4  -2   81.69   27.90
 -12  -4  -2   81.19   15.00
 -12  -4  -2   53.39   28.80
 -12   4  -2   47.80   15.70
  12   4   2   68.99   18.60
 -12   4  -2   54.69   22.90
 -12   4  -2   69.99   19.80
  12   4   2   48.40   20.20
 -12   4  -2   44.10   26.20
  12   4   2   63.79   21.90
  13  -4   2   28.20   29.00
 -13  -4  -2   24.80   34.60
  13  -4   2   45.90   25.80
 -13  -4  -2   24.40   33.00
 -13  -4  -2   29.50   17.40
 -13   4  -2   -7.30   17.10
  13   4   2    4.30   20.40
  13   4   2    1.70   20.70
 -13   4  -2   28.30   30.00
  13   4   2  -24.90   25.60
 -13   4  -2   -7.20   27.90
 -13   4  -2  -11.90   23.60
  14  -4   2   25.10   27.50
 -14  -4  -2    1.60   46.50
 -14  -4  -2   16.20   20.70
  14  -4   2   36.30   31.00
 -14  -4  -2   31.30   42.80
 -14   4  -2    1.80   39.10
 -14   4  -2  -48.80   37.30
  14   4   2   -1.10   26.90
 -14   4  -2  -22.50   32.00
 -14   4  -2   38.90   26.60
  14   4   2    0.70   33.00
  14   4   2    5.30   25.40
  15  -4   2   89.19   34.10
 -15  -4  -2   92.59   27.40
  15  -4   2   34.50   39.40
 -15   4  -2   93.79   25.80
  15   4   2   64.49   31.10
  15   4   2  126.09   33.30
 -15   4  -2   15.00   59.69
 -15   4  -2  105.99   67.59
  15  -5  -2   46.80   38.10
  15  -5  -2   62.59   34.60
  15   5  -2  150.28   33.20
  15   5  -2   43.20   30.20
 -15   5   2   82.49   36.70
 -15   5   2   -4.50   41.50
 -15   5   2   43.50   23.50
 -14  -5   2   10.70   35.40
  14  -5  -2   37.20   29.20
  14  -5  -2   80.89   34.20
  14   5  -2   35.00   26.00
 -14   5   2   84.59   20.10
  14   5  -2   55.19   29.00
  14   5  -2   26.40   26.50
 -14   5   2  107.49   35.00
 -14   5   2   19.40   40.40
  13  -5  -2  260.47   31.20
 -13  -5   2  262.77   33.60
  13  -5  -2  202.18   32.20
 -13  -5   2  250.77   37.10
  13   5  -2  280.47   33.40
 -13   5   2  234.08   30.90
  13   5  -2  219.28   27.40
 -13   5   2  252.97   34.30
 -13   5   2  317.97   27.60
  13   5  -2  219.08   26.00
 -12  -5   2  398.16   44.80
 -12  -5   2  235.58   29.00
  12  -5  -2  236.28   46.60
  12  -5  -2  273.87   30.60
  12   5  -2  206.48   22.90
  12   5  -2  226.38   28.80
 -12   5   2  238.08   26.10
 -12   5   2  232.38   24.10
  12   5  -2  235.58   29.10
 -12   5   2  193.38   27.00
 -11  -5   2  178.38   21.20
  11  -5  -2  217.08   26.50
 -11  -5   2  178.68   26.70
  11  -5  -2  212.78   24.00
 -11  -5   2  242.08   30.40
 -11   5   2  192.58   22.80
  11   5  -2  168.58   18.90
 -11   5   2  203.68   21.40
  11   5  -2  197.08   25.10
  11   5  -2  191.88   20.80
 -11   5   2  187.38   22.00
  10  -5  -2   43.40   14.60
 -10  -5   2   34.40   16.50
 -10  -5   2    4.80   19.40
 -10  -5   2   15.70   11.00
  10  -5  -2   27.10   15.60
  10   5  -2   21.00   13.30
 -10   5   2   24.10   16.10
 -10   5   2   23.70   15.20
 -10   5   2   39.20   10.90
  10   5  -2   25.00   13.20
  10   5  -2   20.50   13.40
   9  -5  -2   44.00   12.10
  -9  -5   2   42.90   10.50
  -9  -5   2   20.30   13.90
   9  -5  -2   42.90   15.10
  -9  -5   2   20.50   16.70
   9   5  -2   40.20   12.90
   9   5  -2   38.60   11.60
   9   5  -2   39.20   12.00
  -9   5   2   18.80   10.10
  -9   5   2   38.70   13.80
  -9   5   2   46.80   14.00
   8  -5  -2   69.59   13.10
  -8  -5   2   92.79   10.80
  -8  -5   2   86.39   16.10
   8  -5  -2  106.69   12.90
  -8  -5   2   84.79   14.00
   8  -5  -2   93.29   18.80
   8   5  -2   96.99   14.40
  -8   5   2  105.09   13.20
  -8   5   2  103.09   10.90
  -8   5   2   90.09   16.40
   8   5  -2   83.29   12.20
   8   5  -2   82.39   11.00
   7  -5  -2  277.07   21.50
  -7  -5   2  254.27   15.40
   7  -5  -2  262.07   17.00
   7  -5  -2  276.87   18.90
  -7  -5   2  255.47   19.10
  -7   5   2  256.97   15.50
  -7   5   2  281.67   18.20
   7   5  -2  291.87   17.00
   7   5  -2  254.57   17.40
   7   5  -2  271.47   16.70
  -7   5   2  289.37   17.50
   6  -5  -2  352.96   19.90
  -6  -5   2  316.77   15.90
  -6  -5   2  344.27   18.50
  -6  -5   2  347.87   20.40
   6  -5  -2  337.57   19.00
   6  -5  -2  349.17   17.90
   6   5  -2  355.56   17.60
   6   5  -2  343.17   17.60
  -6   5   2  324.87   18.10
  -6   5   2  354.66   17.10
  -6   5   2  348.47   16.40
   6   5  -2  333.77   16.50
   5  -5  -2  161.48   12.10
   5  -5  -2  152.68   14.50
  -5  -5   2  154.38   11.00
   5  -5  -2  156.38   13.40
  -5  -5   2  140.59   14.10
  -5   5   2  173.58   11.90
  -5   5   2  181.18   11.40
  -5   5   2  158.68   13.20
   5   5  -2  150.38   11.50
   5   5  -2  177.48   12.00
   5   5  -2  165.58   12.60
   4  -5  -2  785.12   27.50
  -4  -5   2  773.42   28.80
  -4  -5   2  779.22   26.70
  -4  -5   2  780.02   26.70
   4  -5  -2  798.92   28.40
   4  -5  -2  761.92   28.10
   4   5  -2  793.62   26.50
   4   5  -2  783.62   27.70
   4   5  -2  790.82   26.20
  -4   5   2  796.62   26.90
  -4   5   2  786.72   27.00
  -4   5   2  791.32   27.90
   3  -5  -2  741.73   25.70
   3  -5  -2  707.23   25.30
  -3  -5   2  742.93   24.10
  -3  -5   2  739.93   24.60
  -3  -5   2  722.53   26.50
   3  -5  -2  714.33   26.10
   3   5  -2  733.03   23.70
  -3   5   2  727.03   24.80
   3   5  -2  737.73   25.70
  -3   5   2  743.43   26.00
   3   5  -2  745.93   24.30
  -3   5   2  720.23   24.70
  -2  -5   2  172.88    8.70
   2  -5  -2  163.28    9.80
   2  -5  -2  162.28   10.00
   2  -5  -2  153.58   10.80
  -2  -5   2  119.19   10.90
  -2   5   2  156.08    9.30
   2   5  -2  177.98    7.60
   2   5  -2  164.28    9.90
  -2   5   2  157.98   10.90
   2   5  -2  169.28    8.50
  -2   5   2  159.18    8.90
   1  -5  -2 2031.50   63.29
  -1  -5   2 2124.09   62.19
   1  -5  -2 2106.39   64.09
   1  -5  -2 2156.68   62.79
   1  -5  -2 2106.09   61.19
  -1   5   2 2089.79   63.99
   1   5  -2 2171.88   61.99
  -1   5   2 2044.40   62.99
   1   5  -2 2165.48   62.09
  -1   5   2 2140.79   61.29
  -1   5   2 2084.89   62.29
   0  -5  -2 1576.94   50.39
   0  -5  -2 1732.03   48.10
   0  -5  -2 1602.44   48.60
   0   5  -2 1657.93   48.10
   0   5  -2 1683.83   49.20
   0   5   2 1733.93   48.30
   0   5   2 1550.24   49.70
   0   5   2 1627.24   50.59
   0   5  -2 1552.14   49.80
   0   5   2 1583.94   48.30
  -1  -5  -2  800.52   24.60
   1  -5   2  742.83   25.80
  -1  -5  -2  756.52   26.70
  -1  -5  -2  792.72   24.30
   1   5   2  790.52   24.10
  -1   5  -2  770.62   23.80
   1   5   2  814.42   24.90
  -1   5  -2  801.12   26.10
  -1   5  -2  761.52   26.20
   1   5   2  759.32   27.00
   1   5   2  760.22   26.00
   2  -5   2 1154.18   37.10
  -2  -5  -2 1240.78   36.30
   2  -5   2 1179.88   35.30
  -2   5  -2 1169.98   37.70
  -2   5  -2 1171.18   35.20
   2   5   2 1142.79   37.00
  -2   5  -2 1130.89   37.00
   2   5   2 1176.28   38.30
   2   5   2 1212.08   36.40
  -3  -5  -2  115.19    8.30
   3  -5   2  127.49    7.50
   3  -5   2  113.49    9.60
  -3   5  -2  119.99   10.30
  -3   5  -2  116.59    8.10
   3   5   2  121.19   10.00
   3   5   2  121.39    9.90
  -3   5  -2  104.49    9.80
   3   5   2  127.89    8.90
   4  -5   2 1849.61   56.39
  -4  -5  -2 1890.31   56.79
  -4  -5  -2 1888.11   58.59
   4  -5   2 1818.82   57.19
  -4   5  -2 1886.81   58.39
   4   5   2 1859.91   56.89
   4   5   2 1872.01   58.09
  -4   5  -2 1822.72   56.29
  -4   5  -2 1846.02   56.59
   4   5   2 1937.51   57.69
  -5  -5  -2  477.55   22.30
   5  -5   2  465.25   18.90
  -5  -5  -2  472.45   18.70
   5  -5   2  455.85   19.60
  -5   5  -2  474.25   20.70
   5   5   2  481.05   19.40
  -5   5  -2  467.85   19.10
   5   5   2  458.75   19.90
  -5   5  -2  483.85   19.30
   5   5   2  438.46   20.70
  -6  -5  -2  716.33   29.20
   6  -5   2  645.14   26.10
   6  -5   2  666.63   25.50
  -6  -5  -2  689.13   28.80
  -6  -5  -2  660.33   24.70
   6   5   2  700.03   25.70
  -6   5  -2  681.33   25.30
  -6   5  -2  663.53   26.70
   6   5   2  690.13   26.20
   6   5   2  649.64   28.00
  -6   5  -2  679.83   26.20
   7  -5   2 1001.40   36.70
  -7  -5  -2 1040.20   35.10
   7  -5   2 1000.80   36.20
  -7  -5  -2 1071.09   40.10
  -7  -5  -2  993.90   39.70
   7   5   2 1000.60   36.60
   7   5   2 1037.70   36.50
   7   5   2 1036.20   37.40
  -7   5  -2  987.80   35.50
  -7   5  -2  988.50   37.10
  -7   5  -2 1030.80   36.80
  -8  -5  -2  314.97   25.90
  -8  -5  -2  347.47   18.30
   8  -5   2  339.77   21.90
   8  -5   2  338.57   20.40
  -8  -5  -2  311.47   25.70
   8   5   2  354.06   22.10
  -8   5  -2  300.07   20.60
  -8   5  -2  342.37   24.00
   8   5   2  349.77   20.50
   8   5   2  381.76   20.60
  -8   5  -2  363.16   20.90
  -9  -5  -2  226.48   26.40
  -9  -5  -2  216.38   27.70
   9  -5   2  234.88   20.60
  -9  -5  -2  232.98   18.10
   9  -5   2  239.38   22.10
  -9   5  -2  212.48   21.50
   9   5   2  229.88   20.50
   9   5   2  262.97   23.00
  -9   5  -2  207.28   20.40
  -9   5  -2  255.87   24.50
   9   5   2  262.87   21.30
 -10  -5  -2    4.20   18.60
 -10  -5  -2  -14.90    9.70
 -10  -5  -2   -4.50   18.60
  10  -5   2    5.80   13.20
  10  -5   2   -5.70   15.60
  10   5   2    0.30   13.20
  10   5   2    3.20   13.40
 -10   5  -2    6.10   12.40
 -10   5  -2    9.10   14.20
  10   5   2   -6.70   14.90
 -10   5  -2   16.60   15.80
 -10   5  -2    4.40   16.70
  11  -5   2  138.69   22.50
 -11  -5  -2  155.48   26.40
  11  -5   2  159.08   19.00
 -11  -5  -2  140.09   15.60
 -11  -5  -2  185.08   26.70
  11   5   2  148.99   19.30
  11   5   2  127.59   20.20
 -11   5  -2  172.68   17.40
 -11   5  -2  203.88   24.10
 -11   5  -2  174.98   19.70
  11   5   2  233.08   25.00
 -11   5  -2  155.88   21.70
  12  -5   2  135.79   24.00
 -12  -5  -2  133.59   30.70
 -12  -5  -2  176.28   31.90
  12  -5   2  134.69   22.20
 -12   5  -2  145.49   24.00
 -12   5  -2  128.49   26.70
 -12   5  -2   90.29   23.20
  12   5   2  130.69   20.80
  12   5   2  124.19   23.60
 -12   5  -2  148.49   18.10
  12   5   2  137.39   23.40
 -13  -5  -2   73.09   38.50
  13  -5   2   92.19   23.60
  13  -5   2   40.70   30.90
 -13  -5  -2   90.59   19.20
 -13  -5  -2  112.79   35.00
 -13   5  -2   42.90   26.30
  13   5   2   91.09   29.00
 -13   5  -2   76.79   27.00
  13   5   2    8.40   22.30
 -13   5  -2   51.99   28.60
 -13   5  -2   58.89   31.00
  13   5   2   13.50   21.80
  14  -5   2   17.70   31.40
 -14  -5  -2   57.29   54.39
  14  -5   2   24.70   28.10
 -14  -5  -2   53.79   22.20
  14   5   2   32.30   26.60
 -14   5  -2  102.49   39.50
  14   5   2   15.80   26.30
 -14   5  -2   21.00   21.80
 -14   5  -2   23.50   37.90
 -14   5  -2  -48.40   33.10
  14   5   2  -24.40   31.80
  14  -6  -2   13.90   29.00
  14  -6  -2   20.70   32.60
 -14   6   2    4.60   20.10
  14   6  -2  -33.60   25.20
  14   6  -2   20.90   26.30
 -14   6   2    8.00   37.00
 -13  -6   2   61.79   31.80
  13  -6  -2   37.50   28.60
  13  -6  -2   22.80   22.40
 -13   6   2   30.50   17.30
 -13   6   2    2.30   29.30
  13   6  -2   -4.90   21.40
  13   6  -2   15.50   25.00
  13   6  -2   28.50   22.00
 -13   6   2   16.30   29.00
  12  -6  -2   91.89   39.40
  12  -6  -2   65.69   20.10
 -12  -6   2   66.49   24.90
 -12  -6   2   44.30   16.80
 -12  -6   2   77.39   29.90
 -12   6   2   16.10   23.50
 -12   6   2   18.50   14.30
  12   6  -2   40.00   18.00
 -12   6   2   41.60   23.80
  12   6  -2   21.20   19.70
  12   6  -2   41.20   20.10
 -11  -6   2   46.70   23.60
  11  -6  -2   26.40   19.30
  11  -6  -2   32.40   17.20
 -11  -6   2   50.89   13.70
 -11  -6   2   75.59   22.50
 -11   6   2   80.19   20.50
  11   6  -2   32.80   16.20
 -11   6   2   55.19   13.30
  11   6  -2   64.39   26.40
 -11   6   2   26.50   17.80
  11   6  -2   47.40   15.50
  10  -6  -2   69.59   16.30
 -10  -6   2   79.69   21.50
 -10  -6   2   56.99   18.80
 -10  -6   2   87.29   13.70
  10  -6  -2   57.39   17.50
  10   6  -2   99.49   16.70
  10   6  -2   71.19   14.90
 -10   6   2   79.29   13.30
 -10   6   2   84.49   17.70
 -10   6   2   80.49   16.80
  10   6  -2   89.09   15.70
   9  -6  -2   89.39   16.40
  -9  -6   2  109.09   19.80
  -9  -6   2   80.49   11.80
  -9  -6   2  101.29   17.10
   9  -6  -2   94.79   15.60
   9   6  -2   94.19   13.90
  -9   6   2   91.49   12.40
   9   6  -2  101.89   13.80
  -9   6   2   92.79   16.20
  -9   6   2  124.79   15.90
  -8  -6   2  596.24   29.30
  -8  -6   2  620.74   26.50
   8  -6  -2  589.44   33.00
  -8  -6   2  585.24   32.70
   8  -6  -2  665.03   30.40
   8  -6  -2  597.44   28.80
   8   6  -2  650.73   28.60
  -8   6   2  651.83   29.00
  -8   6   2  562.34   39.70
   8   6  -2  618.14   26.80
   8   6  -2  629.54   27.90
  -8   6   2  634.34   26.40
  -7  -6   2   89.69   10.10
   7  -6  -2   89.79   12.70
  -7  -6   2   93.89   14.50
   7  -6  -2   94.49   11.40
  -7  -6   2   85.09   12.70
   7  -6  -2   89.49   14.50
   7   6  -2   98.39   11.50
   7   6  -2   94.39   11.40
   7   6  -2   89.39   11.00
  -7   6   2   93.89   11.40
  -7   6   2   92.59   10.40
  -7   6   2   89.59   12.10
  -6  -6   2  703.33   26.70
   6  -6  -2  727.33   29.40
   6  -6  -2  741.63   28.40
  -6  -6   2  748.13   31.10
   6  -6  -2  702.03   30.20
   6   6  -2  754.52   28.40
  -6   6   2  696.13   27.30
  -6   6   2  744.33   28.40
   6   6  -2  684.53   26.80
  -6   6   2  744.43   27.10
   6   6  -2  742.43   27.20
  -5  -6   2  862.41   32.70
  -5  -6   2  842.32   29.60
   5  -6  -2  835.32   31.50
   5  -6  -2  810.92   30.50
  -5  -6   2  796.02   29.90
   5  -6  -2  822.72   32.10
   5   6  -2  888.11   31.10
  -5   6   2  862.71   31.00
   5   6  -2  883.91   29.80
   5   6  -2  879.31   29.30
  -5   6   2  842.42   29.70
  -5   6   2  856.61   29.80
  -4  -6   2 1170.28   40.50
   4  -6  -2 1217.08   40.00
  -4  -6   2 1182.58   38.10
   4  -6  -2 1158.58   38.90
   4  -6  -2 1219.78   39.90
  -4  -6   2 1148.09   38.00
   4   6  -2 1188.08   37.70
  -4   6   2 1158.78   39.40
  -4   6   2 1169.58   37.90
   4   6  -2 1181.98   39.20
  -4   6   2 1109.99   38.10
   4   6  -2 1199.28   37.20
   3  -6  -2  412.16   17.90
  -3  -6   2  402.06   16.20
   3  -6  -2  408.96   17.20
  -3  -6   2  379.66   18.00
   3  -6  -2  401.46   18.40
   3   6  -2  430.46   15.10
   3   6  -2  411.16   16.10
   3   6  -2  388.76   17.40
  -3   6   2  424.96   18.60
  -3   6   2  417.16   16.40
  -3   6   2  401.96   16.50
  -2  -6   2  206.88   10.20
   2  -6  -2  195.68   11.80
   2  -6  -2  197.68   11.20
   2  -6  -2  206.68   12.60
  -2  -6   2  189.58    9.30
  -2   6   2  201.48   10.30
  -2   6   2  206.38   11.00
  -2   6   2  201.08   13.10
   2   6  -2  201.08    8.60
   2   6  -2  194.78   11.60
   2   6  -2  208.08   10.00
   1  -6  -2  975.90   32.00
  -1  -6   2 1028.40   31.50
   1  -6  -2  977.20   32.60
   1  -6  -2 1008.00   30.10
   1  -6  -2 1007.60   33.90
   1   6  -2  943.31   33.20
   1   6  -2 1015.50   31.50
  -1   6   2 1000.70   33.90
   1   6  -2 1034.20   31.10
  -1   6   2  993.60   31.60
  -1   6   2 1002.90   30.40
  -1   6   2  977.50   32.40
   0  -6  -2    1.70    5.00
   0  -6  -2    5.00    3.20
   0  -6  -2    4.80    4.20
   0   6  -2    8.20    5.70
   0   6  -2    7.50    4.70
   0   6   2    6.90    3.50
   0   6   2    8.70    3.90
   0   6   2    9.00    5.20
   0   6  -2   11.50    3.40
   0   6   2    8.20    6.10
   0   6   2    8.30    5.50
   1  -6   2  108.49    9.30
  -1  -6  -2   87.99    6.90
  -1  -6  -2   89.19    7.30
  -1  -6  -2   97.09    9.90
  -1  -6  -2   83.49    9.40
  -1   6  -2   98.39    9.20
   1   6   2   95.49    6.30
   1   6   2   87.49    9.40
  -1   6  -2   89.99    6.20
   1   6   2   89.89   10.70
  -1   6  -2   90.99   10.00
   1   6   2   97.89    7.50
   2  -6   2  233.58   12.60
  -2  -6  -2  254.57   10.80
  -2  -6  -2  230.38   13.20
   2  -6   2  221.28    9.50
   2   6   2  216.78   14.20
  -2   6  -2  202.28   12.90
  -2   6  -2  225.58    9.50
   2   6   2  235.08   11.20
  -2   6  -2  227.58   12.50
   2   6   2  235.18   12.60
   3  -6   2  262.87   11.60
   3  -6   2  258.27   14.30
  -3  -6  -2  276.67   12.60
  -3   6  -2  272.67   14.30
   3   6   2  289.27   14.70
  -3   6  -2  296.67   14.90
   3   6   2  266.07   14.10
   3   6   2  267.07   12.90
  -3   6  -2  274.67   12.00
   4  -6   2 1164.08   39.20
   4  -6   2 1209.18   37.90
  -4  -6  -2 1189.38   38.30
   4   6   2 1179.08   38.40
  -4   6  -2 1194.48   40.10
  -4   6  -2 1158.68   38.70
  -4   6  -2 1214.48   37.80
   4   6   2 1220.08   39.10
   4   6   2 1196.98   39.90
   5  -6   2   90.89    9.80
  -5  -6  -2   87.79   11.10
   5  -6   2   91.29   10.20
  -5  -6  -2  107.99    9.80
   5   6   2   97.69   12.40
   5   6   2   82.99    8.80
  -5   6  -2   94.89   12.00
  -5   6  -2   77.99    9.40
   5   6   2  110.59   11.70
  -5   6  -2   89.09   10.60
   6  -6   2   51.59    8.00
  -6  -6  -2   40.00    7.20
  -6  -6  -2   43.70   11.40
   6  -6   2   43.10    9.30
   6   6   2   52.49   10.10
   6   6   2   52.39    9.10
  -6   6  -2   50.39    9.30
  -6   6  -2   53.49    9.00
  -6   6  -2   35.80    8.90
   6   6   2   68.29    9.20
  -7  -6  -2   48.10    8.00
   7  -6   2   49.70   11.40
  -7  -6  -2   48.80   14.00
   7  -6   2   43.40    9.20
   7   6   2   38.60    9.80
  -7   6  -2   43.20   10.20
   7   6   2   38.30    9.70
   7   6   2   10.70   19.00
  -7   6  -2   50.69   10.00
  -8  -6  -2    0.30   15.50
  -8  -6  -2   -3.40   13.90
  -8  -6  -2   -2.30    7.70
   8  -6   2    7.00   12.00
   8  -6   2   -2.00    9.30
   8   6   2   -9.20    9.70
  -8   6  -2   10.50   11.80
   8   6   2   -1.10   11.30
  -8   6  -2   -2.20   10.80
   8   6   2   -3.80   10.80
  -8   6  -2  -12.30    9.70
  -9  -6  -2   45.00   19.20
  -9  -6  -2   36.70   17.90
  -9  -6  -2   42.20    9.90
   9  -6   2   23.00   12.80
   9  -6   2   37.60   14.50
   9   6   2   52.09   12.80
  -9   6  -2   60.49   15.80
   9   6   2   54.69   12.40
   9   6   2   51.99   14.30
  -9   6  -2   52.29   12.50
 -10  -6  -2   92.59   23.20
  10  -6   2  179.68   20.30
 -10  -6  -2  161.68   23.10
 -10  -6  -2  113.79   14.10
  10  -6   2  128.99   16.80
 -10   6  -2  157.58   16.50
  10   6   2  140.09   16.50
 -10   6  -2  135.49   19.90
 -10   6  -2  150.08   19.20
  10   6   2  127.09   18.50
  10   6   2  149.09   17.70
 -11  -6  -2   -5.10   12.80
  11  -6   2   40.00   17.00
  11  -6   2   30.10   19.30
 -11  -6  -2   62.89   24.70
 -11  -6  -2   17.20   24.70
  11   6   2   12.30   17.50
 -11   6  -2   12.70   20.00
 -11   6  -2    8.60   18.90
  11   6   2    0.70   18.50
 -11   6  -2   23.60   18.00
  11   6   2   15.10   15.60
 -11   6  -2   18.40   14.60
 -12  -6  -2   78.29   17.20
 -12  -6  -2   78.59   30.60
  12  -6   2  110.99   23.80
  12  -6   2  117.29   23.30
 -12  -6  -2   92.09   32.40
  12   6   2   88.19   20.00
 -12   6  -2  104.79   19.10
  12   6   2  113.69   21.50
 -12   6  -2  105.29   26.30
 -12   6  -2  112.49   24.30
  12   6   2   73.29   24.70
 -12   6  -2   68.29   22.60
 -13  -6  -2   54.09   18.80
 -13  -6  -2   30.70   39.70
 -13  -6  -2  -16.90   35.40
  13  -6   2   -7.20   23.20
  13   6   2   41.40   28.80
  13   6   2   21.50   24.20
 -13   6  -2   41.20   18.30
 -13   6  -2   27.10   27.40
  13   6   2  -12.10   21.40
 -13   6  -2   53.59   32.70
 -13   6  -2   -5.70   27.70
 -14  -6  -2  -26.20   22.50
  14  -6   2   42.40   35.10
  14  -6   2   39.40   29.10
  14   6   2   72.09   28.00
 -14   6  -2   36.20   32.80
 -14   6  -2   97.49   23.50
 -14   6  -2  -12.60   37.50
  14   6   2   38.30   28.30
 -14   6  -2   34.70   42.90
  14  -7  -2   26.30   35.60
  14  -7  -2   23.80   32.00
  14   7  -2    1.80   26.40
 -14   7   2   53.49   21.50
 -14   7   2   49.60   36.20
  14   7  -2   36.50   25.80
  13  -7  -2   58.59   30.50
 -13  -7   2   57.59   32.80
  13  -7  -2   -1.90   25.50
  13   7  -2   -0.90   22.70
 -13   7   2   22.10   29.70
 -13   7   2   15.20   31.60
 -13   7   2    9.30   18.20
  13   7  -2   18.60   25.30
  13   7  -2   15.70   22.70
 -12  -7   2  155.28   34.20
 -12  -7   2  221.78   28.00
  12  -7  -2  169.58   41.90
  12  -7  -2  185.78   29.00
 -12  -7   2  181.18   30.00
  12   7  -2  205.58   22.50
 -12   7   2  147.79   25.80
 -12   7   2  111.39   28.20
 -12   7   2  180.58   28.40
  12   7  -2  213.68   24.40
  12   7  -2  129.39   23.10
 -11  -7   2   33.70   26.10
  11  -7  -2   53.49   21.80
  11  -7  -2   59.59   18.70
 -11  -7   2   61.19   22.60
 -11   7   2   74.99   14.50
 -11   7   2   12.70   18.70
  11   7  -2   44.60   17.30
  11   7  -2   54.89   17.20
  11   7  -2   55.19   16.90
 -11   7   2   67.79   21.30
 -10  -7   2  160.18   24.70
  10  -7  -2  178.68   21.80
 -10  -7   2  130.09   15.70
 -10  -7   2  147.09   22.80
  10  -7  -2  136.19   19.10
 -10   7   2  148.69   19.60
  10   7  -2  184.78   27.30
  10   7  -2  125.69   17.20
 -10   7   2  202.38   19.90
 -10   7   2  139.69   19.20
  10   7  -2  191.28   22.90
  -9  -7   2   81.39   17.80
   9  -7  -2  111.19   17.70
   9  -7  -2   82.79   15.10
  -9  -7   2  103.39   20.20
  -9  -7   2   82.09   12.70
  -9   7   2   96.99   16.40
   9   7  -2  105.69   15.80
  -9   7   2   69.09   11.80
  -9   7   2  127.19   16.40
   9   7  -2  106.79   14.60
   9   7  -2   91.39   14.00
  -8  -7   2  101.19   12.00
   8  -7  -2  102.49   17.80
   8  -7  -2   88.39   13.50
  -8  -7   2   82.59   17.10
   8  -7  -2  109.59   16.60
  -8  -7   2   94.49   15.50
  -8   7   2  104.29   11.80
  -8   7   2   96.69   13.90
   8   7  -2  106.59   13.60
  -8   7   2  113.69   15.00
   8   7  -2  103.29   12.30
   8   7  -2  105.49   13.60
  -7  -7   2  192.78   15.00
  -7  -7   2  213.68   22.50
   7  -7  -2  169.98   18.60
   7  -7  -2  192.68   22.70
   7  -7  -2  202.98   17.30
   7   7  -2  206.78   16.30
  -7   7   2  131.39   21.40
  -7   7   2  179.38   15.00
   7   7  -2  198.68   16.60
   7   7  -2  174.48   16.20
  -7   7   2  147.99   17.30
  -6  -7   2   11.40    6.40
   6  -7  -2   -6.80    7.40
   6  -7  -2   -9.80   10.50
   6  -7  -2   15.10    9.30
  -6  -7   2    3.70   18.40
  -6  -7   2    7.80    9.00
  -6   7   2    4.70    7.50
   6   7  -2   14.70    7.90
  -6   7   2    3.80    9.00
  -6   7   2    7.20    6.50
   6   7  -2    2.90   10.90
   6   7  -2    3.30    7.80
   5  -7  -2   98.39   11.90
   5  -7  -2  115.19   14.20
  -5  -7   2   92.29   11.20
  -5  -7   2   95.09   10.20
   5  -7  -2  106.19   11.80
  -5   7   2  102.59   11.10
   5   7  -2  121.29   12.10
   5   7  -2  116.09   11.50
  -5   7   2   99.29   10.80
   5   7  -2   95.79    9.20
  -5   7   2   91.79   11.10
  -4  -7   2   34.60    6.40
   4  -7  -2   29.40    8.80
   4  -7  -2   39.20    8.50
   4  -7  -2   41.10    7.70
  -4  -7   2   33.70   10.10
  -4   7   2   40.80    7.00
   4   7  -2   31.30    7.40
  -4   7   2   43.70    7.30
  -4   7   2   29.40    8.20
   4   7  -2   34.20    6.50
   4   7  -2   40.80    6.80
  -3  -7   2  834.22   28.00
   3  -7  -2  763.92   28.70
   3  -7  -2  813.92   29.70
  -3  -7   2  807.62   27.00
   3  -7  -2  814.72   30.30
  -3   7   2  833.12   28.00
   3   7  -2  828.02   27.70
   3   7  -2  831.02   26.30
  -3   7   2  817.92   28.30
  -3   7   2  828.02   30.30
   3   7  -2  809.32   29.30
   2  -7  -2  338.87   17.00
  -2  -7   2  348.37   14.40
   2  -7  -2  332.67   16.20
   2  -7  -2  340.07   15.50
  -2   7   2  346.27   17.50
   2   7  -2  345.57   14.30
  -2   7   2  329.77   14.60
  -2   7   2  325.57   14.90
   2   7  -2  351.96   16.30
   1  -7  -2  293.47   11.30
   1  -7  -2  293.37   13.90
  -1  -7   2  286.07   12.30
   1  -7  -2  290.97   15.60
   1   7  -2  311.87   12.40
   1   7  -2  299.77   13.10
   1   7  -2  272.07   15.60
  -1   7   2  286.97   14.00
  -1   7   2  275.27   12.60
  -1   7   2  277.17   11.70
  -1   7   2  301.37   16.40
   0  -7  -2   13.60    3.90
   0  -7  -2   26.00    6.50
   0  -7  -2    8.80    4.90
   0   7   2   13.10    4.10
   0   7  -2   11.00    4.80
   0   7  -2   10.40    3.80
   0   7   2   11.40    5.60
   0   7   2   14.30    4.40
   0   7  -2   17.10    6.80
   0   7   2   14.80    7.00
   0   7   2   12.60    6.20
  -1  -7  -2  524.25   18.10
  -1  -7  -2  489.25   20.50
   1  -7   2  495.25   20.10
  -1  -7  -2  523.55   21.20
  -1  -7  -2  493.05   18.10
   1   7   2  484.95   17.30
   1   7   2  509.15   20.00
  -1   7  -2  512.25   19.80
   1   7   2  524.45   18.20
   1   7   2  496.95   21.60
  -1   7  -2  505.15   20.90
  -1   7  -2  504.65   17.00
  -2  -7  -2  241.18   11.30
   2  -7   2  246.68   14.10
  -2  -7  -2  236.38   15.30
  -2  -7  -2  260.57   12.10
   2  -7   2  244.28   10.70
   2   7   2  266.77   14.20
   2   7   2  252.37   15.80
  -2   7  -2  253.97   10.40
   2   7   2  263.87   10.50
  -2   7  -2  264.57   14.40
  -2   7  -2  256.37   14.70
   2   7   2  267.87   12.50
   3  -7   2  377.26   17.70
  -3  -7  -2  403.26   16.20
   3  -7   2  377.36   14.80
  -3  -7  -2  383.86   18.90
  -3   7  -2  372.86   17.80
   3   7   2  381.76   16.30
  -3   7  -2  373.36   14.70
   3   7   2  377.26   17.60
   3   7   2  383.46   19.60
  -3   7  -2  383.36   18.00
   4  -7   2  164.28   12.90
  -4  -7  -2  166.18   11.10
   4  -7   2  160.88   10.70
  -4   7  -2  157.78   13.50
  -4   7  -2  169.18   13.50
   4   7   2  149.88   11.70
   4   7   2  166.78   13.00
  -4   7  -2  144.79   10.80
   4   7   2  147.29   12.90
  -5  -7  -2  638.24   23.90
   5  -7   2  615.94   23.70
   5  -7   2  642.84   25.70
   5   7   2  618.74   24.50
   5   7   2  650.63   25.80
  -5   7  -2  617.44   24.80
   5   7   2  677.33   25.60
  -5   7  -2  638.54   23.80
  -5   7  -2  611.14   25.90
  -6  -7  -2   12.30   11.00
   6  -7   2    6.60    8.80
  -6  -7  -2   20.60    6.60
   6  -7   2   14.60    7.40
  -6   7  -2   27.70    9.10
   6   7   2   24.10    8.30
   6   7   2   19.30    9.50
   6   7   2    6.10    9.40
  -6   7  -2   12.10    7.70
  -6   7  -2   27.70    9.10
   7  -7   2   57.99   11.30
   7  -7   2   45.90   10.00
  -7  -7  -2   57.29   13.80
  -7  -7  -2   40.40    8.70
   7   7   2   41.70   11.80
  -7   7  -2   52.59   11.10
   7   7   2   47.40   10.60
  -7   7  -2   47.30   10.70
   7   7   2   46.10   10.40
  -7   7  -2   44.80   11.20
  -8  -7  -2  244.88   26.10
   8  -7   2  182.98   19.00
   8  -7   2  203.88   21.40
  -8  -7  -2  234.98   17.10
   8   7   2  244.48   19.20
  -8   7  -2  211.88   20.70
   8   7   2  233.18   20.90
  -8   7  -2  214.48   19.70
  -8   7  -2  253.97   20.50
   8   7   2  162.48   22.20
  -9  -7  -2  155.08   21.60
   9  -7   2  153.88   18.20
  -9  -7  -2  143.09   17.10
   9  -7   2  125.69   15.90
  -9   7  -2  120.49   14.70
   9   7   2  183.18   19.80
  -9   7  -2  148.69   16.90
  -9   7  -2  121.79   17.90
   9   7   2  188.18   23.80
   9   7   2  145.89   16.70
  10  -7   2  213.78   27.70
  10  -7   2  211.48   23.00
 -10  -7  -2  167.78   25.40
 -10  -7  -2  155.48   19.80
 -10   7  -2  200.98   23.30
  10   7   2  143.59   18.00
  10   7   2  157.18   18.60
 -10   7  -2  206.18   21.20
 -10   7  -2  202.48   22.00
  10   7   2  167.58   19.90
 -11  -7  -2   20.90   24.80
 -11  -7  -2   51.89   15.70
  11  -7   2  106.19   21.90
  11  -7   2   70.99   20.50
 -11   7  -2   93.09   23.10
 -11   7  -2   90.09   17.20
  11   7   2   84.19   20.10
 -11   7  -2   72.49   20.70
 -11   7  -2   95.69   20.90
  11   7   2   96.59   18.40
  12  -7   2  209.98   24.30
 -12  -7  -2  174.98   20.60
  12  -7   2  183.58   26.50
 -12  -7  -2  244.08   34.30
  12   7   2  154.18   22.40
  12   7   2  193.98   28.80
 -12   7  -2  154.68   25.80
 -12   7  -2  152.58   29.00
 -12   7  -2  176.38   26.80
 -12   7  -2  194.28   21.60
  12   7   2  199.38   24.30
  13  -7   2   32.80   32.40
 -13  -7  -2   16.10   20.50
  13  -7   2   41.60   24.60
 -13  -7  -2   27.20   37.50
  13   7   2   12.90   22.40
  13   7   2  -34.80   32.30
  13   7   2   13.20   26.20
 -13   7  -2   -1.80   32.40
 -13   7  -2   57.49   19.90
 -13   7  -2   12.40   29.30
 -13   7  -2   10.50   29.50
  14  -7   2  -47.50   34.70
  14  -7   2  -55.69   28.20
 -14  -7  -2  -30.80   23.00
  14   7   2   32.00   28.30
 -14   7  -2   44.10   24.70
  14   7   2  -41.40   29.30
 -14   7  -2   25.40   39.30
  14  -8  -2   40.80   33.10
  14  -8  -2  114.69   36.70
 -14   8   2   63.19   23.20
  14   8  -2   50.79   29.00
  14   8  -2    7.30   29.50
 -13  -8   2   59.49   34.60
  13  -8  -2   78.49   33.50
  13  -8  -2   88.79   28.90
 -13   8   2   14.80   32.50
  13   8  -2   43.80   23.50
 -13   8   2   51.39   31.20
 -13   8   2   23.90   20.20
  13   8  -2  145.49   26.50
  12  -8  -2   20.50   22.30
 -12  -8   2   30.10   34.20
  12  -8  -2   32.10   26.10
 -12  -8   2   40.90   18.20
 -12  -8   2   56.49   29.40
  12   8  -2   33.30   21.80
  12   8  -2   58.69   19.60
 -12   8   2   47.20   26.00
  12   8  -2   15.00   21.40
 -12   8   2   23.50   26.90
 -12   8   2   24.90   17.20
 -11  -8   2   29.40   24.40
 -11  -8   2   50.69   29.40
  11  -8  -2   49.99   22.30
  11  -8  -2   38.20   19.50
 -11  -8   2   32.60   14.90
  11   8  -2   33.90   18.10
  11   8  -2   56.09   19.30
  11   8  -2   48.10   17.50
 -11   8   2  -26.80   19.50
 -11   8   2   25.30   21.10
 -11   8   2   -9.70   21.40
 -10  -8   2    2.90   20.10
 -10  -8   2    6.10   22.90
  10  -8  -2  -36.70   14.80
  10  -8  -2   11.80   18.70
 -10  -8   2   -0.20   11.90
  10   8  -2   -4.90   14.60
  10   8  -2   -7.40   18.50
 -10   8   2  -12.60   16.70
 -10   8   2  -13.80   15.60
  10   8  -2   23.30   16.90
 -10   8   2  -16.60   11.70
   9  -8  -2  602.74   31.60
   9  -8  -2  616.14   33.10
  -9  -8   2  467.15   32.60
  -9  -8   2  577.94   39.70
  -9  -8   2  592.84   27.70
   9   8  -2  564.04   29.20
   9   8  -2  542.95   30.20
  -9   8   2  567.04   27.10
  -9   8   2  537.75   31.10
  -9   8   2  593.64   31.90
   8  -8  -2  109.29   15.00
  -8  -8   2  117.49   13.10
  -8  -8   2  123.89   20.80
   8  -8  -2   94.69   20.00
   8  -8  -2  138.49   17.60
  -8   8   2  116.99   12.90
  -8   8   2  122.79   16.10
  -8   8   2  110.59   14.40
   8   8  -2  117.09   13.40
   8   8  -2  131.79   14.60
   8   8  -2  121.29   14.60
  -7  -8   2  744.03   29.50
   7  -8  -2  744.43   33.60
  -7  -8   2  742.13   36.00
  -7  -8   2  621.14   30.80
   7  -8  -2  737.63   35.70
   7  -8  -2  760.72   31.40
  -7   8   2  741.83   29.50
   7   8  -2  727.53   29.30
  -7   8   2  730.73   30.00
   7   8  -2  717.83   30.90
  -7   8   2  783.72   32.00
   7   8  -2  726.13   29.60
  -6  -8   2  122.19   14.40
   6  -8  -2  142.99   17.10
   6  -8  -2  126.59   15.80
   6  -8  -2  139.79   15.30
  -6  -8   2  146.69   13.10
  -6   8   2  144.09   14.50
   6   8  -2  171.68   14.30
  -6   8   2  165.78   13.90
   6   8  -2  155.88   15.00
  -6   8   2  158.08   21.40
   6   8  -2  174.18   14.80
  -5  -8   2 1020.70   35.10
   5  -8  -2  995.90   38.30
   5  -8  -2  991.70   36.20
   5  -8  -2 1015.40   38.00
  -5  -8   2  914.91   38.80
  -5   8   2 1018.90   36.90
  -5   8   2 1025.50   35.50
   5   8  -2 1064.89   35.20
   5   8  -2 1031.80   34.10
   5   8  -2 1012.40   36.60
  -5   8   2 1037.00   34.90
  -4  -8   2  542.65   21.60
   4  -8  -2  492.35   24.30
   4  -8  -2  547.95   24.30
   4  -8  -2  550.14   22.80
  -4  -8   2  565.54   21.80
  -4   8   2  562.24   21.60
   4   8  -2  584.24   20.50
  -4   8   2  573.54   24.50
   4   8  -2  590.74   22.10
  -4   8   2  502.05   21.80
   4   8  -2  567.94   23.60
   3  -8  -2  437.86   20.20
  -3  -8   2  405.26   16.60
  -3  -8   2  410.66   17.30
   3  -8  -2  402.96   20.20
   3  -8  -2  417.56   18.40
   3   8  -2  392.86   19.00
   3   8  -2  405.06   17.40
  -3   8   2  403.76   17.50
  -3   8   2  400.76   20.60
  -3   8   2  398.16   17.30
   3   8  -2  413.46   15.60
   2  -8  -2 2629.94   82.89
   2  -8  -2 2656.83   81.49
   2  -8  -2 2739.53   81.89
  -2  -8   2 2848.31   80.59
  -2   8   2 2667.13   80.49
   2   8  -2 2673.63   82.59
  -2   8   2 2589.84   80.49
   2   8  -2 2707.63   79.09
   2   8  -2 2667.33   82.79
   2   8  -2 2784.82   80.09
  -2   8   2 2667.13   82.89
   1  -8  -2  161.98   13.10
  -1  -8   2  161.18    9.90
   1  -8  -2  153.28   12.30
   1  -8  -2  172.68    8.90
   1   8  -2  167.08   10.20
   1   8  -2  173.98   10.60
  -1   8   2  151.28   13.40
  -1   8   2  146.09   14.30
  -1   8   2  168.08   10.40
   1   8  -2  152.68   14.00
  -1   8   2  146.99    9.50
  -1   8   2  151.38   11.40
   0  -8  -2 2394.36   73.39
   0  -8  -2 2396.46   69.59
   0  -8  -2 2368.96   70.79
   0   8   2 2322.67   73.59
   0   8  -2 2295.87   72.69
   0   8   2 2251.17   71.29
   0   8   2 2462.25   69.69
   0   8   2 2252.87   71.49
   0   8  -2 2353.06   70.89
   0   8  -2 2449.66   69.49
   0   8   2 2341.87   69.99
  -1  -8  -2 1040.60   33.40
  -1  -8  -2 1075.79   33.20
  -1  -8  -2  971.50   36.10
  -1  -8  -2 1010.90   36.30
   1  -8   2 1046.10   35.90
  -1   8  -2 1038.10   34.80
   1   8   2  984.70   34.70
   1   8   2 1019.90   36.90
   1   8   2 1074.89   32.60
  -1   8  -2 1011.20   36.10
  -1   8  -2 1019.40   31.90
   1   8   2 1098.39   33.30
  -2  -8  -2 1815.72   55.09
   2  -8   2 1745.53   56.99
  -2  -8  -2 1806.32   57.29
   2   8   2 1864.21   55.19
  -2   8  -2 1778.82   57.19
   2   8   2 1824.52   55.99
  -2   8  -2 1791.92   56.69
   2   8   2 1806.62   53.59
   2   8   2 1780.22   58.49
   3  -8   2  275.47   16.20
  -3  -8  -2  269.17   18.20
   3  -8   2  282.17   12.90
  -3  -8  -2  301.27   13.90
  -3   8  -2  293.57   17.40
   3   8   2  294.67   14.50
  -3   8  -2  317.67   16.50
   3   8   2  307.77   18.70
   3   8   2  284.87   16.00
  -3   8  -2  282.37   12.80
  -4  -8  -2  204.08   12.20
  -4  -8  -2  198.98   17.00
   4  -8   2  202.98   11.90
   4  -8   2  186.08   14.70
   4   8   2  193.78   15.00
  -4   8  -2  200.48   15.50
   4   8   2  211.98   13.40
  -4   8  -2  214.48   15.00
   4   8   2  207.48   14.90
  -4   8  -2  220.28   12.00
   5  -8   2   31.60    9.00
  -5  -8  -2    9.40   10.50
  -5  -8  -2   30.30    6.90
   5  -8   2   33.40    6.90
  -5   8  -2   33.30    8.50
   5   8   2   33.50    8.70
   5   8   2   34.10    9.30
   5   8   2   18.70    8.00
  -5   8  -2   48.80    8.00
  -5   8  -2   22.20    9.00
   6  -8   2  208.48   14.80
   6  -8   2  212.78   17.50
  -6  -8  -2  181.28   14.00
  -6   8  -2  204.58   17.10
  -6   8  -2  185.98   15.20
   6   8   2  196.08   17.30
  -6   8  -2  202.18   16.90
   6   8   2  191.78   16.60
   6   8   2  177.78   16.70
   7  -8   2   26.10   12.30
   7  -8   2   22.00    9.50
  -7  -8  -2   41.60   14.90
  -7  -8  -2   37.30    9.60
   7   8   2   40.60   11.70
   7   8   2   20.10   10.20
  -7   8  -2   30.70   10.60
   7   8   2   31.50   10.90
  -7   8  -2   38.30   11.10
  -7   8  -2   27.50   11.20
  -8  -8  -2   37.70   17.70
[truncated: 2,905,235 more chars]
