# Supplementary material
Source: MDPI journal article supplement (https://www.mdpi.com/2304-6740/7/10/117)
Supplement: s1 [file s1 › inorganics-584457-Supplementary Materials/CIF and CIFcheck files/Zn9.cif]

####################################################################### 
# 
# This file contains crystal structure data downloaded from the 
# Cambridge Structural Database (CSD) hosted by the Cambridge 
# Crystallographic Data Centre (CCDC).
# 
# Full information about CCDC data access policies and citation 
# guidelines are available at http://www.ccdc.cam.ac.uk/access/V1 
# 
# Audit and citation data items may have been added by the CCDC. 
# Please retain this information to preserve the provenance of 
# this file and to allow appropriate attribution of the data. 
# 
#######################################################################

data_zn9
_database_code_depnum_ccdc_archive 'CCDC 1918206'
loop_
_audit_author_name
_audit_author_address
'Igor Mueller'
;Philipps University Marburg
Germany
;
_audit_update_record             
;
2019-05-23 deposited with the CCDC.	2019-08-14 downloaded from the CCDC.
;
_audit_creation_date             2019-05-23
_audit_creation_method           
;
Olex2 1.2-alpha
(compiled 2018.07.26 svn.r3523 for OlexSys, GUI svn.r5532)
;
_shelx_SHELXL_version_number     2014/7
_audit_contact_author_address    Philipps-University
_audit_contact_author_email      gunnar.werncke@chemie.uni-marburg.de
_audit_contact_author_name       C.
_audit_contact_author_phone      +4964212825637
_publ_contact_author_id_orcid    299638391
_publ_section_references         
;
Dolomanov, O.V., Bourhis, L.J., Gildea, R.J, Howard, J.A.K. & Puschmann, H.
 (2009), J. Appl. Cryst. 42, 339-341.

Sheldrick, G.M. (2008). Acta Cryst. A64, 112-122.
;
_chemical_name_common            ?
_chemical_name_systematic        ?
_chemical_formula_moiety         '2(C22 H44 N4 Si4 Zn)'
_chemical_formula_sum            'C44 H88 N8 Si8 Zn2'
_chemical_formula_weight         1084.68
_chemical_absolute_configuration ?
_chemical_melting_point          ?
loop_
_atom_type_symbol
_atom_type_description
_atom_type_scat_dispersion_real
_atom_type_scat_dispersion_imag
_atom_type_scat_source
C C 0.0033 0.0016 'International Tables Vol C Tables 4.2.6.8 and 6.1.1.4'
H H 0.0000 0.0000 'International Tables Vol C Tables 4.2.6.8 and 6.1.1.4'
N N 0.0061 0.0033 'International Tables Vol C Tables 4.2.6.8 and 6.1.1.4'
Si Si 0.0817 0.0704 'International Tables Vol C Tables 4.2.6.8 and 6.1.1.4'
Zn Zn 0.2839 1.4301 'International Tables Vol C Tables 4.2.6.8 and 6.1.1.4'

_shelx_space_group_comment       
;
The symmetry employed for this shelxl refinement is uniquely defined
by the following loop, which should always be used as a source of
symmetry information in preference to the above space-group names.
They are only intended as comments.
;
_space_group_crystal_system      orthorhombic
_space_group_IT_number           29
_space_group_name_H-M_alt        'P c a 21'
_space_group_name_Hall           'P 2c -2ac'
loop_
_space_group_symop_operation_xyz
'x, y, z'
'-x, -y, z+1/2'
'x+1/2, -y, z'
'-x+1/2, y, z+1/2'

_cell_length_a                   18.8806(12)
_cell_length_b                   18.0560(13)
_cell_length_c                   17.6133(17)
_cell_angle_alpha                90
_cell_angle_beta                 90
_cell_angle_gamma                90
_cell_volume                     6004.5(8)
_cell_formula_units_Z            4
_cell_measurement_reflns_used    11789
_cell_measurement_temperature    100
_cell_measurement_theta_max      25.998
_cell_measurement_theta_min      2.157
_shelx_estimated_absorpt_T_max   0.920
_shelx_estimated_absorpt_T_min   0.786
_exptl_absorpt_coefficient_mu    0.994
_exptl_absorpt_correction_T_max  0.8736
_exptl_absorpt_correction_T_min  0.8727
_exptl_absorpt_correction_type   sphere
_exptl_absorpt_process_details   'X-Area LANA 1.68.2.0 (STOE, 2016)'
_exptl_absorpt_special_details   ?
_exptl_crystal_colour            'clear greenish yellow'
_exptl_crystal_colour_lustre     clear
_exptl_crystal_colour_modifier   greenish
_exptl_crystal_colour_primary    yellow
_exptl_crystal_density_diffrn    1.200
_exptl_crystal_density_meas      ?
_exptl_crystal_density_method    ?
_exptl_crystal_description       block
_exptl_crystal_F_000             2320
_exptl_crystal_size_max          0.254
_exptl_crystal_size_mid          0.189
_exptl_crystal_size_min          0.085
_exptl_crystal_size_rad          0.092
_exptl_transmission_factor_max   ?
_exptl_transmission_factor_min   ?
_diffrn_reflns_av_R_equivalents  0.0737
_diffrn_reflns_av_unetI/netI     0.0589
_diffrn_reflns_Laue_measured_fraction_full 0.999
_diffrn_reflns_Laue_measured_fraction_max 1.000
_diffrn_reflns_limit_h_max       23
_diffrn_reflns_limit_h_min       -23
_diffrn_reflns_limit_k_max       22
_diffrn_reflns_limit_k_min       -21
_diffrn_reflns_limit_l_max       21
_diffrn_reflns_limit_l_min       -21
_diffrn_reflns_number            52603
_diffrn_reflns_point_group_measured_fraction_full 1.000
_diffrn_reflns_point_group_measured_fraction_max 1.000
_diffrn_reflns_theta_full        25.242
_diffrn_reflns_theta_max         25.998
_diffrn_reflns_theta_min         2.157
_diffrn_ambient_temperature      100
_diffrn_detector_area_resol_mean ?
_diffrn_measured_fraction_theta_full 0.999
_diffrn_measured_fraction_theta_max 1.000
_diffrn_measurement_device_type  'STOE IPDS-2'
_diffrn_measurement_method       '\w scans'
_diffrn_radiation_type           MoK\a
_diffrn_radiation_wavelength     0.71073
_diffrn_source                   ?
_diffrn_standards_number         0
_reflns_Friedel_coverage         0.932
_reflns_Friedel_fraction_full    1.000
_reflns_Friedel_fraction_max     1.000
_reflns_number_gt                9936
_reflns_number_total             11789
_reflns_special_details          
;
 Reflections were merged by SHELXL according to the crystal
 class for the calculation of statistics and refinement.
 
 _reflns_Friedel_fraction is defined as the number of unique
 Friedel pairs measured divided by the number that would be
 possible theoretically, ignoring centric projections and
 systematic absences.
;
_reflns_threshold_expression     'I > 2\s(I)'
_computing_cell_refinement       ?
_computing_data_collection       ?
_computing_data_reduction        ?
_computing_molecular_graphics    'Olex2 (Dolomanov et al., 2009)'
_computing_publication_material  'Olex2 (Dolomanov et al., 2009)'
_computing_structure_refinement  'XL (Sheldrick, 2008)'
_computing_structure_solution    'ShelXT (Sheldrick, 2015)'
_refine_diff_density_max         0.580
_refine_diff_density_min         -0.215
_refine_diff_density_rms         0.066
_refine_ls_abs_structure_details 
;
 Refined as an inversion twin.
;
_refine_ls_abs_structure_Flack   0.292(9)
_refine_ls_extinction_coef       .
_refine_ls_extinction_method     none
_refine_ls_goodness_of_fit_ref   0.969
_refine_ls_hydrogen_treatment    constr
_refine_ls_matrix_type           full
_refine_ls_number_parameters     584
_refine_ls_number_reflns         11789
_refine_ls_number_restraints     1
_refine_ls_R_factor_all          0.0445
_refine_ls_R_factor_gt           0.0340
_refine_ls_restrained_S_all      0.969
_refine_ls_shift/su_max          0.001
_refine_ls_shift/su_mean         0.000
_refine_ls_structure_factor_coef Fsqd
_refine_ls_weighting_details     
'w=1/[\s^2^(Fo^2^)+(0.0385P)^2^] where P=(Fo^2^+2Fc^2^)/3'
_refine_ls_weighting_scheme      calc
_refine_ls_wR_factor_gt          0.0700
_refine_ls_wR_factor_ref         0.0718
_refine_special_details          
;
 Refined as a 2-component inversion twin.
;
_olex2_refinement_description    
;
1. Twinned data refinement
 Scales: 0.708(9)
 0.292(9)
2. Fixed Uiso
 At 1.2 times of:
  All C(H) groups
 At 1.5 times of:
  All C(H,H,H) groups
3.a Aromatic/amide H refined with riding coordinates:
 C1(H1), C2(H2), C3(H3), C4(H4), C7(H7), C8(H8), C9(H9), C10(H10), C23(H23),
 C24(H24), C25(H25), C26(H26), C29(H29), C30(H30), C31(H31), C32(H32)
3.b Idealised Me refined as rotating group:
 C11(H11A,H11B,H11C), C12(H12A,H12B,H12C), C13(H13A,H13B,H13C), C14(H14A,H14B,
 H14C), C15(H15A,H15B,H15C), C16(H16A,H16B,H16C), C17(H17A,H17B,H17C), C18(H18A,
 H18B,H18C), C19(H19A,H19B,H19C), C20(H20A,H20B,H20C), C21(H21A,H21B,H21C),
 C22(H22A,H22B,H22C), C33(H33A,H33B,H33C), C34(H34A,H34B,H34C), C35(H35A,H35B,
 H35C), C36(H36A,H36B,H36C), C37(H37A,H37B,H37C), C38(H38A,H38B,H38C), C39(H39A,
 H39B,H39C), C40(H40A,H40B,H40C), C41(H41A,H41B,H41C), C42(H42A,H42B,H42C),
 C43(H43A,H43B,H43C), C44(H44A,H44B,H44C)
;
_atom_sites_solution_hydrogens   geom
_atom_sites_solution_primary     dual
_atom_sites_solution_secondary   ?
loop_
_atom_site_label
_atom_site_type_symbol
_atom_site_fract_x
_atom_site_fract_y
_atom_site_fract_z
_atom_site_U_iso_or_equiv
_atom_site_adp_type
_atom_site_occupancy
_atom_site_site_symmetry_order
_atom_site_calc_flag
_atom_site_refinement_flags_posn
_atom_site_refinement_flags_adp
_atom_site_refinement_flags_occupancy
_atom_site_disorder_assembly
_atom_site_disorder_group
Zn1 Zn 0.62336(2) 0.51836(2) 0.63947(3) 0.01968(11) Uani 1 1 d . . . . .
Si1 Si 0.70888(7) 0.66628(6) 0.61637(7) 0.0262(3) Uani 1 1 d . . . . .
Si2 Si 0.73578(7) 0.53688(6) 0.51247(8) 0.0285(3) Uani 1 1 d . . . . .
Si3 Si 0.69358(6) 0.38852(6) 0.72664(7) 0.0209(3) Uani 1 1 d . . . . .
Si4 Si 0.54937(6) 0.36337(6) 0.65683(7) 0.0226(3) Uani 1 1 d . . . . .
N1 N 0.53240(19) 0.56649(19) 0.5822(2) 0.0234(8) Uani 1 1 d . . . . .
N2 N 0.56194(18) 0.56960(18) 0.7297(2) 0.0228(8) Uani 1 1 d . . . . .
N3 N 0.69682(18) 0.57597(18) 0.5902(2) 0.0215(8) Uani 1 1 d . . . . .
N4 N 0.62360(18) 0.41548(18) 0.6716(2) 0.0224(8) Uani 1 1 d . . . . .
C1 C 0.5284(2) 0.5737(2) 0.5070(3) 0.0278(10) Uani 1 1 d . . . . .
H1 H 0.5594 0.5449 0.4764 0.033 Uiso 1 1 calc R . . . .
C2 C 0.4812(3) 0.6211(3) 0.4710(3) 0.0365(12) Uani 1 1 d . . . . .
H2 H 0.4793 0.6245 0.4172 0.044 Uiso 1 1 calc R . . . .
C3 C 0.4371(3) 0.6628(3) 0.5164(3) 0.0401(13) Uani 1 1 d . . . . .
H3 H 0.4044 0.6962 0.4938 0.048 Uiso 1 1 calc R . . . .
C4 C 0.4403(2) 0.6563(3) 0.5941(3) 0.0333(11) Uani 1 1 d . . . . .
H4 H 0.4096 0.6847 0.6255 0.040 Uiso 1 1 calc R . . . .
C5 C 0.4888(2) 0.6077(2) 0.6264(3) 0.0251(10) Uani 1 1 d . . . . .
C6 C 0.5003(2) 0.6009(2) 0.7089(3) 0.0264(10) Uani 1 1 d . . . . .
C7 C 0.4518(3) 0.6247(3) 0.7632(3) 0.0339(11) Uani 1 1 d . . . . .
H7 H 0.4084 0.6467 0.7479 0.041 Uiso 1 1 calc R . . . .
C8 C 0.4671(3) 0.6161(3) 0.8386(3) 0.0386(13) Uani 1 1 d . . . . .
H8 H 0.4344 0.6325 0.8760 0.046 Uiso 1 1 calc R . . . .
C9 C 0.5297(3) 0.5836(3) 0.8603(3) 0.0322(11) Uani 1 1 d . . . . .
H9 H 0.5410 0.5770 0.9124 0.039 Uiso 1 1 calc R . . . .
C10 C 0.5759(3) 0.5606(2) 0.8033(3) 0.0281(10) Uani 1 1 d . . . . .
H10 H 0.6192 0.5376 0.8175 0.034 Uiso 1 1 calc R . . . .
C11 C 0.6342(3) 0.7273(3) 0.5854(4) 0.0450(14) Uani 1 1 d . . . . .
H11A H 0.6279 0.7230 0.5303 0.068 Uiso 1 1 calc GR . . . .
H11B H 0.6450 0.7789 0.5984 0.068 Uiso 1 1 calc GR . . . .
H11C H 0.5905 0.7121 0.6111 0.068 Uiso 1 1 calc GR . . . .
C12 C 0.7915(3) 0.7087(3) 0.5756(3) 0.0404(13) Uani 1 1 d . . . . .
H12A H 0.8331 0.6825 0.5952 0.061 Uiso 1 1 calc GR . . . .
H12B H 0.7940 0.7610 0.5902 0.061 Uiso 1 1 calc GR . . . .
H12C H 0.7903 0.7047 0.5201 0.061 Uiso 1 1 calc GR . . . .
C13 C 0.7158(4) 0.6790(3) 0.7222(3) 0.0549(17) Uani 1 1 d . . . . .
H13A H 0.6725 0.6607 0.7465 0.082 Uiso 1 1 calc GR . . . .
H13B H 0.7218 0.7317 0.7338 0.082 Uiso 1 1 calc GR . . . .
H13C H 0.7566 0.6512 0.7414 0.082 Uiso 1 1 calc GR . . . .
C14 C 0.7242(4) 0.5934(3) 0.4240(3) 0.0557(17) Uani 1 1 d . . . . .
H14A H 0.6741 0.5934 0.4092 0.084 Uiso 1 1 calc GR . . . .
H14B H 0.7527 0.5719 0.3830 0.084 Uiso 1 1 calc GR . . . .
H14C H 0.7397 0.6443 0.4335 0.084 Uiso 1 1 calc GR . . . .
C15 C 0.8331(3) 0.5203(3) 0.5240(4) 0.0553(16) Uani 1 1 d . . . . .
H15A H 0.8573 0.5676 0.5326 0.083 Uiso 1 1 calc GR . . . .
H15B H 0.8519 0.4970 0.4779 0.083 Uiso 1 1 calc GR . . . .
H15C H 0.8412 0.4875 0.5675 0.083 Uiso 1 1 calc GR . . . .
C16 C 0.6964(3) 0.4437(2) 0.4890(3) 0.0335(11) Uani 1 1 d . . . . .
H16A H 0.7009 0.4108 0.5330 0.050 Uiso 1 1 calc GR . . . .
H16B H 0.7216 0.4221 0.4456 0.050 Uiso 1 1 calc GR . . . .
H16C H 0.6462 0.4497 0.4762 0.050 Uiso 1 1 calc GR . . . .
C17 C 0.7584(2) 0.4655(2) 0.7414(3) 0.0297(11) Uani 1 1 d . . . . .
H17A H 0.7967 0.4485 0.7748 0.045 Uiso 1 1 calc GR . . . .
H17B H 0.7343 0.5078 0.7648 0.045 Uiso 1 1 calc GR . . . .
H17C H 0.7783 0.4804 0.6923 0.045 Uiso 1 1 calc GR . . . .
C18 C 0.7472(3) 0.3104(2) 0.6855(3) 0.0289(11) Uani 1 1 d . . . . .
H18A H 0.7165 0.2673 0.6774 0.043 Uiso 1 1 calc GR . . . .
H18B H 0.7853 0.2971 0.7208 0.043 Uiso 1 1 calc GR . . . .
H18C H 0.7677 0.3259 0.6370 0.043 Uiso 1 1 calc GR . . . .
C19 C 0.6644(2) 0.3593(2) 0.8244(3) 0.0265(10) Uani 1 1 d . . . . .
H19A H 0.6436 0.4018 0.8509 0.040 Uiso 1 1 calc GR . . . .
H19B H 0.7054 0.3411 0.8530 0.040 Uiso 1 1 calc GR . . . .
H19C H 0.6290 0.3198 0.8202 0.040 Uiso 1 1 calc GR . . . .
C20 C 0.5648(3) 0.2606(2) 0.6658(3) 0.0326(11) Uani 1 1 d . . . . .
H20A H 0.5958 0.2439 0.6246 0.049 Uiso 1 1 calc GR . . . .
H20B H 0.5194 0.2345 0.6627 0.049 Uiso 1 1 calc GR . . . .
H20C H 0.5873 0.2500 0.7148 0.049 Uiso 1 1 calc GR . . . .
C21 C 0.5139(3) 0.3749(3) 0.5578(3) 0.0314(11) Uani 1 1 d . . . . .
H21A H 0.4999 0.4266 0.5499 0.047 Uiso 1 1 calc GR . . . .
H21B H 0.4727 0.3426 0.5508 0.047 Uiso 1 1 calc GR . . . .
H21C H 0.5507 0.3615 0.5210 0.047 Uiso 1 1 calc GR . . . .
C22 C 0.4753(2) 0.3884(3) 0.7237(3) 0.0375(12) Uani 1 1 d . . . . .
H22A H 0.4916 0.3832 0.7762 0.056 Uiso 1 1 calc GR . . . .
H22B H 0.4349 0.3553 0.7150 0.056 Uiso 1 1 calc GR . . . .
H22C H 0.4607 0.4397 0.7146 0.056 Uiso 1 1 calc GR . . . .
Zn2 Zn 0.60708(3) 0.03986(2) 0.38389(3) 0.02063(11) Uani 1 1 d . . . . .
Si5 Si 0.71734(6) 0.16031(6) 0.42209(7) 0.0219(3) Uani 1 1 d . . . . .
Si6 Si 0.69595(6) 0.03063(6) 0.53238(7) 0.0226(3) Uani 1 1 d . . . . .
Si7 Si 0.66208(7) -0.11138(7) 0.32094(8) 0.0288(3) Uani 1 1 d . . . . .
Si8 Si 0.50635(7) -0.09425(7) 0.34787(7) 0.0291(3) Uani 1 1 d . . . . .
N5 N 0.51812(19) 0.1100(2) 0.4102(2) 0.0248(8) Uani 1 1 d . . . . .
N6 N 0.58043(19) 0.09419(18) 0.2762(2) 0.0223(8) Uani 1 1 d . . . . .
N7 N 0.67849(18) 0.08032(18) 0.4524(2) 0.0211(8) Uani 1 1 d . . . . .
N8 N 0.59136(19) -0.06241(19) 0.3546(2) 0.0250(8) Uani 1 1 d . . . . .
C23 C 0.4946(2) 0.1228(3) 0.4810(3) 0.0308(11) Uani 1 1 d . . . . .
H23 H 0.5169 0.0979 0.5220 0.037 Uiso 1 1 calc R . . . .
C24 C 0.4394(3) 0.1708(3) 0.4966(3) 0.0410(13) Uani 1 1 d . . . . .
H24 H 0.4236 0.1786 0.5472 0.049 Uiso 1 1 calc R . . . .
C25 C 0.4081(3) 0.2067(3) 0.4365(4) 0.0504(15) Uani 1 1 d . . . . .
H25 H 0.3691 0.2389 0.4452 0.061 Uiso 1 1 calc R . . . .
C26 C 0.4327(3) 0.1963(3) 0.3644(3) 0.0433(14) Uani 1 1 d . . . . .
H26 H 0.4121 0.2223 0.3230 0.052 Uiso 1 1 calc R . . . .
C27 C 0.4883(2) 0.1471(3) 0.3523(3) 0.0294(11) Uani 1 1 d . . . . .
C28 C 0.5195(2) 0.1326(2) 0.2763(3) 0.0255(10) Uani 1 1 d . . . . .
C29 C 0.4877(3) 0.1565(2) 0.2087(3) 0.0312(11) Uani 1 1 d . . . . .
H29 H 0.4445 0.1835 0.2099 0.037 Uiso 1 1 calc R . . . .
C30 C 0.5197(2) 0.1404(2) 0.1406(3) 0.0342(11) Uani 1 1 d . . . . .
H30 H 0.4993 0.1567 0.0941 0.041 Uiso 1 1 calc R . . . .
C31 C 0.5821(2) 0.1003(2) 0.1406(3) 0.0309(10) Uani 1 1 d . . . . .
H31 H 0.6053 0.0882 0.0944 0.037 Uiso 1 1 calc R . . . .
C32 C 0.6096(2) 0.0783(2) 0.2094(3) 0.0275(10) Uani 1 1 d . . . . .
H32 H 0.6521 0.0500 0.2091 0.033 Uiso 1 1 calc R . . . .
C33 C 0.4641(3) -0.0708(3) 0.2546(3) 0.0365(12) Uani 1 1 d . . . . .
H33A H 0.4612 -0.0168 0.2492 0.055 Uiso 1 1 calc GR . . . .
H33B H 0.4163 -0.0919 0.2527 0.055 Uiso 1 1 calc GR . . . .
H33C H 0.4926 -0.0912 0.2132 0.055 Uiso 1 1 calc GR . . . .
C34 C 0.5000(3) -0.1978(3) 0.3620(3) 0.0437(14) Uani 1 1 d . . . . .
H34A H 0.5295 -0.2229 0.3242 0.066 Uiso 1 1 calc GR . . . .
H34B H 0.4506 -0.2135 0.3560 0.066 Uiso 1 1 calc GR . . . .
H34C H 0.5165 -0.2105 0.4131 0.066 Uiso 1 1 calc GR . . . .
C35 C 0.4473(3) -0.0549(3) 0.4237(3) 0.0445(14) Uani 1 1 d . . . . .
H35A H 0.4735 -0.0522 0.4717 0.067 Uiso 1 1 calc GR . . . .
H35B H 0.4058 -0.0869 0.4301 0.067 Uiso 1 1 calc GR . . . .
H35C H 0.4319 -0.0052 0.4089 0.067 Uiso 1 1 calc GR . . . .
C36 C 0.6450(3) -0.1497(3) 0.2230(3) 0.0404(13) Uani 1 1 d . . . . .
H36A H 0.6083 -0.1880 0.2259 0.061 Uiso 1 1 calc GR . . . .
H36B H 0.6888 -0.1714 0.2029 0.061 Uiso 1 1 calc GR . . . .
H36C H 0.6291 -0.1098 0.1895 0.061 Uiso 1 1 calc GR . . . .
C37 C 0.7444(3) -0.0534(3) 0.3115(3) 0.0346(12) Uani 1 1 d . . . . .
H37A H 0.7372 -0.0160 0.2719 0.052 Uiso 1 1 calc GR . . . .
H37B H 0.7844 -0.0852 0.2977 0.052 Uiso 1 1 calc GR . . . .
H37C H 0.7543 -0.0288 0.3599 0.052 Uiso 1 1 calc GR . . . .
C38 C 0.6876(3) -0.1916(2) 0.3837(3) 0.0418(12) Uani 1 1 d . . . . .
H38A H 0.6934 -0.1742 0.4360 0.063 Uiso 1 1 calc GR . . . .
H38B H 0.7323 -0.2129 0.3658 0.063 Uiso 1 1 calc GR . . . .
H38C H 0.6504 -0.2294 0.3819 0.063 Uiso 1 1 calc GR . . . .
C39 C 0.7795(3) -0.0262(3) 0.5272(3) 0.0337(11) Uani 1 1 d . . . . .
H39A H 0.7738 -0.0654 0.4892 0.051 Uiso 1 1 calc GR . . . .
H39B H 0.7889 -0.0485 0.5769 0.051 Uiso 1 1 calc GR . . . .
H39C H 0.8193 0.0057 0.5129 0.051 Uiso 1 1 calc GR . . . .
C40 C 0.6233(2) -0.0374(2) 0.5543(3) 0.0320(11) Uani 1 1 d . . . . .
H40A H 0.5801 -0.0104 0.5681 0.048 Uiso 1 1 calc GR . . . .
H40B H 0.6378 -0.0691 0.5967 0.048 Uiso 1 1 calc GR . . . .
H40C H 0.6141 -0.0681 0.5095 0.048 Uiso 1 1 calc GR . . . .
C41 C 0.7040(2) 0.0890(3) 0.6202(3) 0.0306(11) Uani 1 1 d . . . . .
H41A H 0.7482 0.1174 0.6182 0.046 Uiso 1 1 calc GR . . . .
H41B H 0.7043 0.0569 0.6650 0.046 Uiso 1 1 calc GR . . . .
H41C H 0.6637 0.1230 0.6231 0.046 Uiso 1 1 calc GR . . . .
C42 C 0.6513(3) 0.2364(2) 0.4053(3) 0.0343(12) Uani 1 1 d . . . . .
H42A H 0.6217 0.2238 0.3615 0.052 Uiso 1 1 calc GR . . . .
H42B H 0.6764 0.2828 0.3953 0.052 Uiso 1 1 calc GR . . . .
H42C H 0.6214 0.2422 0.4504 0.052 Uiso 1 1 calc GR . . . .
C43 C 0.7668(3) 0.1487(3) 0.3301(3) 0.0315(11) Uani 1 1 d . . . . .
H43A H 0.8026 0.1098 0.3358 0.047 Uiso 1 1 calc GR . . . .
H43B H 0.7900 0.1955 0.3167 0.047 Uiso 1 1 calc GR . . . .
H43C H 0.7335 0.1348 0.2898 0.047 Uiso 1 1 calc GR . . . .
C44 C 0.7835(3) 0.2009(3) 0.4906(3) 0.0342(12) Uani 1 1 d . . . . .
H44A H 0.7597 0.2131 0.5384 0.051 Uiso 1 1 calc GR . . . .
H44B H 0.8041 0.2459 0.4687 0.051 Uiso 1 1 calc GR . . . .
H44C H 0.8212 0.1647 0.5003 0.051 Uiso 1 1 calc GR . . . .

loop_
_atom_site_aniso_label
_atom_site_aniso_U_11
_atom_site_aniso_U_22
_atom_site_aniso_U_33
_atom_site_aniso_U_23
_atom_site_aniso_U_13
_atom_site_aniso_U_12
Zn1 0.0227(2) 0.0179(2) 0.0185(2) 0.0010(2) 0.0008(2) 0.00032(19)
Si1 0.0351(7) 0.0205(6) 0.0229(7) -0.0026(5) 0.0073(5) -0.0064(5)
Si2 0.0369(7) 0.0223(6) 0.0263(7) -0.0035(5) 0.0109(6) -0.0031(5)
Si3 0.0240(6) 0.0188(5) 0.0197(6) 0.0007(5) -0.0008(5) 0.0005(5)
Si4 0.0248(6) 0.0210(5) 0.0221(7) 0.0018(5) -0.0004(5) -0.0031(5)
N1 0.0245(19) 0.0227(19) 0.023(2) 0.0022(16) -0.0027(16) -0.0009(15)
N2 0.025(2) 0.0202(18) 0.023(2) 0.0021(16) 0.0022(17) 0.0004(15)
N3 0.027(2) 0.0180(17) 0.020(2) 0.0025(15) 0.0020(16) -0.0021(15)
N4 0.026(2) 0.0184(17) 0.0229(19) 0.0027(15) 0.0012(16) 0.0022(14)
C1 0.031(3) 0.029(2) 0.024(3) 0.001(2) -0.003(2) 0.0001(19)
C2 0.037(3) 0.040(3) 0.033(3) 0.007(2) -0.007(2) 0.001(2)
C3 0.034(3) 0.040(3) 0.046(3) 0.010(3) -0.012(3) 0.009(2)
C4 0.025(3) 0.035(3) 0.040(3) 0.004(2) 0.002(2) 0.005(2)
C5 0.022(2) 0.019(2) 0.033(3) 0.000(2) -0.001(2) -0.0004(16)
C6 0.029(3) 0.020(2) 0.031(3) 0.0011(19) 0.003(2) -0.0020(19)
C7 0.032(3) 0.031(3) 0.039(3) 0.003(2) 0.007(2) 0.008(2)
C8 0.044(3) 0.040(3) 0.032(3) -0.003(2) 0.017(2) 0.011(2)
C9 0.043(3) 0.036(3) 0.018(3) -0.001(2) 0.009(2) 0.004(2)
C10 0.034(3) 0.022(2) 0.028(3) 0.0003(19) 0.002(2) 0.004(2)
C11 0.050(3) 0.019(2) 0.066(4) -0.003(2) 0.005(3) 0.001(2)
C12 0.045(3) 0.034(3) 0.042(3) -0.010(2) 0.014(3) -0.019(2)
C13 0.099(5) 0.038(3) 0.028(3) -0.012(2) 0.012(3) -0.029(3)
C14 0.110(5) 0.033(3) 0.025(3) -0.005(2) 0.013(3) -0.009(3)
C15 0.039(3) 0.057(3) 0.070(4) -0.028(3) 0.018(3) 0.001(3)
C16 0.049(3) 0.021(2) 0.031(3) -0.006(2) 0.009(2) 0.002(2)
C17 0.028(2) 0.027(2) 0.033(3) 0.004(2) -0.002(2) 0.0008(19)
C18 0.032(3) 0.026(2) 0.029(3) 0.001(2) 0.000(2) 0.0038(19)
C19 0.030(2) 0.025(2) 0.025(3) 0.0038(19) -0.003(2) 0.0014(18)
C20 0.037(3) 0.025(2) 0.035(3) 0.002(2) -0.005(2) -0.006(2)
C21 0.030(3) 0.031(3) 0.033(3) 0.002(2) -0.011(2) -0.007(2)
C22 0.030(3) 0.043(3) 0.040(3) -0.004(2) 0.006(2) -0.008(2)
Zn2 0.0231(2) 0.0188(2) 0.0199(2) -0.0014(2) 0.0003(2) -0.00091(19)
Si5 0.0247(6) 0.0184(6) 0.0226(7) 0.0005(5) -0.0016(5) -0.0019(5)
Si6 0.0259(6) 0.0212(6) 0.0206(6) 0.0007(5) -0.0002(5) -0.0013(5)
Si7 0.0415(8) 0.0208(6) 0.0242(7) -0.0020(5) 0.0007(6) 0.0048(5)
Si8 0.0358(7) 0.0260(6) 0.0254(7) -0.0023(5) -0.0006(6) -0.0096(6)
N5 0.025(2) 0.0248(19) 0.024(2) -0.0029(16) 0.0009(16) -0.0041(16)
N6 0.025(2) 0.0198(18) 0.022(2) 0.0003(15) -0.0007(16) -0.0013(15)
N7 0.025(2) 0.0200(18) 0.0184(19) -0.0029(15) -0.0038(16) -0.0023(14)
N8 0.033(2) 0.0195(18) 0.022(2) -0.0032(15) -0.0004(17) -0.0025(15)
C23 0.029(3) 0.035(3) 0.029(3) -0.004(2) -0.001(2) -0.001(2)
C24 0.038(3) 0.051(3) 0.034(3) -0.017(3) 0.009(2) 0.006(2)
C25 0.044(3) 0.057(4) 0.050(4) -0.012(3) 0.000(3) 0.024(3)
C26 0.041(3) 0.048(3) 0.041(4) -0.007(2) -0.004(3) 0.018(2)
C27 0.027(2) 0.028(2) 0.033(3) -0.008(2) -0.002(2) -0.0025(19)
C28 0.024(2) 0.024(2) 0.029(3) -0.0024(19) -0.003(2) -0.0042(18)
C29 0.032(3) 0.028(2) 0.034(3) 0.003(2) -0.006(2) 0.001(2)
C30 0.043(3) 0.032(2) 0.027(3) 0.005(2) -0.008(2) -0.004(2)
C31 0.036(3) 0.035(2) 0.022(2) 0.000(2) 0.004(2) -0.001(2)
C32 0.028(2) 0.026(2) 0.028(3) -0.002(2) 0.002(2) -0.0013(19)
C33 0.039(3) 0.032(3) 0.039(3) -0.003(2) -0.004(2) -0.011(2)
C34 0.060(4) 0.038(3) 0.033(3) 0.005(2) -0.007(3) -0.022(3)
C35 0.038(3) 0.053(3) 0.043(3) -0.009(3) 0.008(3) -0.020(3)
C36 0.057(3) 0.035(3) 0.030(3) -0.007(2) 0.003(3) 0.012(2)
C37 0.038(3) 0.034(3) 0.031(3) 0.004(2) 0.007(2) 0.010(2)
C38 0.058(3) 0.029(2) 0.039(3) -0.001(3) -0.004(3) 0.006(2)
C39 0.037(3) 0.034(3) 0.029(3) 0.004(2) -0.002(2) 0.006(2)
C40 0.038(3) 0.029(2) 0.029(3) 0.006(2) -0.001(2) -0.005(2)
C41 0.035(3) 0.034(2) 0.023(3) 0.000(2) -0.006(2) 0.001(2)
C42 0.033(3) 0.020(2) 0.050(3) 0.002(2) -0.002(2) -0.0024(19)
C43 0.039(3) 0.028(2) 0.028(3) 0.004(2) 0.004(2) -0.006(2)
C44 0.038(3) 0.031(3) 0.033(3) 0.005(2) -0.006(2) -0.011(2)

_geom_special_details            
;
 All esds (except the esd in the dihedral angle between two l.s. planes)
 are estimated using the full covariance matrix.  The cell esds are taken
 into account individually in the estimation of esds in distances, angles
 and torsion angles; correlations between esds in cell parameters are only
 used when they are defined by crystal symmetry.  An approximate (isotropic)
 treatment of cell esds is used for estimating esds involving l.s. planes.
;
loop_
_geom_bond_atom_site_label_1
_geom_bond_atom_site_label_2
_geom_bond_distance
_geom_bond_site_symmetry_2
_geom_bond_publ_flag
Zn1 N1 2.173(4) . ?
Zn1 N2 2.174(4) . ?
Zn1 N3 1.939(3) . ?
Zn1 N4 1.942(3) . ?
Si1 N3 1.710(3) . ?
Si1 C11 1.872(5) . ?
Si1 C12 1.880(5) . ?
Si1 C13 1.883(5) . ?
Si2 N3 1.706(4) . ?
Si2 C14 1.875(6) . ?
Si2 C15 1.873(6) . ?
Si2 C16 1.886(5) . ?
Si3 N4 1.710(4) . ?
Si3 C17 1.870(4) . ?
Si3 C18 1.881(4) . ?
Si3 C19 1.884(5) . ?
Si4 N4 1.708(4) . ?
Si4 C20 1.884(4) . ?
Si4 C21 1.880(5) . ?
Si4 C22 1.884(5) . ?
N1 C1 1.334(6) . ?
N1 C5 1.356(5) . ?
N2 C6 1.344(6) . ?
N2 C10 1.333(6) . ?
C1 H1 0.9500 . ?
C1 C2 1.388(6) . ?
C2 H2 0.9500 . ?
C2 C3 1.378(7) . ?
C3 H3 0.9500 . ?
C3 C4 1.377(8) . ?
C4 H4 0.9500 . ?
C4 C5 1.389(6) . ?
C5 C6 1.474(7) . ?
C6 C7 1.392(7) . ?
C7 H7 0.9500 . ?
C7 C8 1.369(7) . ?
C8 H8 0.9500 . ?
C8 C9 1.373(7) . ?
C9 H9 0.9500 . ?
C9 C10 1.394(6) . ?
C10 H10 0.9500 . ?
C11 H11A 0.9800 . ?
C11 H11B 0.9800 . ?
C11 H11C 0.9800 . ?
C12 H12A 0.9800 . ?
C12 H12B 0.9800 . ?
C12 H12C 0.9800 . ?
C13 H13A 0.9800 . ?
C13 H13B 0.9800 . ?
C13 H13C 0.9800 . ?
C14 H14A 0.9800 . ?
C14 H14B 0.9800 . ?
C14 H14C 0.9800 . ?
C15 H15A 0.9800 . ?
C15 H15B 0.9800 . ?
C15 H15C 0.9800 . ?
C16 H16A 0.9800 . ?
C16 H16B 0.9800 . ?
C16 H16C 0.9800 . ?
C17 H17A 0.9800 . ?
C17 H17B 0.9800 . ?
C17 H17C 0.9800 . ?
C18 H18A 0.9800 . ?
C18 H18B 0.9800 . ?
C18 H18C 0.9800 . ?
C19 H19A 0.9800 . ?
C19 H19B 0.9800 . ?
C19 H19C 0.9800 . ?
C20 H20A 0.9800 . ?
C20 H20B 0.9800 . ?
C20 H20C 0.9800 . ?
C21 H21A 0.9800 . ?
C21 H21B 0.9800 . ?
C21 H21C 0.9800 . ?
C22 H22A 0.9800 . ?
C22 H22B 0.9800 . ?
C22 H22C 0.9800 . ?
Zn2 N5 2.154(4) . ?
Zn2 N6 2.193(4) . ?
Zn2 N7 1.951(3) . ?
Zn2 N8 1.940(3) . ?
Si5 N7 1.705(4) . ?
Si5 C42 1.878(5) . ?
Si5 C43 1.882(5) . ?
Si5 C44 1.886(5) . ?
Si6 N7 1.703(4) . ?
Si6 C39 1.884(5) . ?
Si6 C40 1.881(5) . ?
Si6 C41 1.877(5) . ?
Si7 N8 1.708(4) . ?
Si7 C36 1.886(5) . ?
Si7 C37 1.881(5) . ?
Si7 C38 1.884(5) . ?
Si8 N8 1.709(4) . ?
Si8 C33 1.875(5) . ?
Si8 C34 1.889(5) . ?
Si8 C35 1.879(5) . ?
N5 C23 1.343(6) . ?
N5 C27 1.344(6) . ?
N6 C28 1.344(6) . ?
N6 C32 1.332(6) . ?
C23 H23 0.9500 . ?
C23 C24 1.383(7) . ?
C24 H24 0.9500 . ?
C24 C25 1.376(8) . ?
C25 H25 0.9500 . ?
C25 C26 1.365(8) . ?
C26 H26 0.9500 . ?
C26 C27 1.392(7) . ?
C27 C28 1.486(7) . ?
C28 C29 1.402(7) . ?
C29 H29 0.9500 . ?
C29 C30 1.374(7) . ?
C30 H30 0.9500 . ?
C30 C31 1.383(7) . ?
C31 H31 0.9500 . ?
C31 C32 1.376(7) . ?
C32 H32 0.9500 . ?
C33 H33A 0.9800 . ?
C33 H33B 0.9800 . ?
C33 H33C 0.9800 . ?
C34 H34A 0.9800 . ?
C34 H34B 0.9800 . ?
C34 H34C 0.9800 . ?
C35 H35A 0.9800 . ?
C35 H35B 0.9800 . ?
C35 H35C 0.9800 . ?
C36 H36A 0.9800 . ?
C36 H36B 0.9800 . ?
C36 H36C 0.9800 . ?
C37 H37A 0.9800 . ?
C37 H37B 0.9800 . ?
C37 H37C 0.9800 . ?
C38 H38A 0.9800 . ?
C38 H38B 0.9800 . ?
C38 H38C 0.9800 . ?
C39 H39A 0.9800 . ?
C39 H39B 0.9800 . ?
C39 H39C 0.9800 . ?
C40 H40A 0.9800 . ?
C40 H40B 0.9800 . ?
C40 H40C 0.9800 . ?
C41 H41A 0.9800 . ?
C41 H41B 0.9800 . ?
C41 H41C 0.9800 . ?
C42 H42A 0.9800 . ?
C42 H42B 0.9800 . ?
C42 H42C 0.9800 . ?
C43 H43A 0.9800 . ?
C43 H43B 0.9800 . ?
C43 H43C 0.9800 . ?
C44 H44A 0.9800 . ?
C44 H44B 0.9800 . ?
C44 H44C 0.9800 . ?

loop_
_geom_angle_atom_site_label_1
_geom_angle_atom_site_label_2
_geom_angle_atom_site_label_3
_geom_angle
_geom_angle_site_symmetry_1
_geom_angle_site_symmetry_3
_geom_angle_publ_flag
N1 Zn1 N2 75.38(14) . . ?
N3 Zn1 N1 98.21(14) . . ?
N3 Zn1 N2 118.73(14) . . ?
N3 Zn1 N4 129.93(15) . . ?
N4 Zn1 N1 121.31(14) . . ?
N4 Zn1 N2 101.28(14) . . ?
N3 Si1 C11 112.5(2) . . ?
N3 Si1 C12 113.3(2) . . ?
N3 Si1 C13 113.1(2) . . ?
C11 Si1 C12 105.9(3) . . ?
C11 Si1 C13 105.6(3) . . ?
C12 Si1 C13 105.7(3) . . ?
N3 Si2 C14 113.0(2) . . ?
N3 Si2 C15 113.7(2) . . ?
N3 Si2 C16 112.0(2) . . ?
C14 Si2 C16 104.9(2) . . ?
C15 Si2 C14 107.0(3) . . ?
C15 Si2 C16 105.5(2) . . ?
N4 Si3 C17 111.91(19) . . ?
N4 Si3 C18 114.3(2) . . ?
N4 Si3 C19 111.9(2) . . ?
C17 Si3 C18 105.0(2) . . ?
C17 Si3 C19 105.8(2) . . ?
C18 Si3 C19 107.4(2) . . ?
N4 Si4 C20 113.73(19) . . ?
N4 Si4 C21 111.8(2) . . ?
N4 Si4 C22 112.5(2) . . ?
C21 Si4 C20 104.0(2) . . ?
C21 Si4 C22 106.8(2) . . ?
C22 Si4 C20 107.4(2) . . ?
C1 N1 Zn1 123.0(3) . . ?
C1 N1 C5 118.8(4) . . ?
C5 N1 Zn1 115.7(3) . . ?
C6 N2 Zn1 116.2(3) . . ?
C10 N2 Zn1 123.6(3) . . ?
C10 N2 C6 119.2(4) . . ?
Si1 N3 Zn1 119.1(2) . . ?
Si2 N3 Zn1 116.46(18) . . ?
Si2 N3 Si1 123.6(2) . . ?
Si3 N4 Zn1 116.07(19) . . ?
Si4 N4 Zn1 118.75(19) . . ?
Si4 N4 Si3 124.3(2) . . ?
N1 C1 H1 118.3 . . ?
N1 C1 C2 123.4(5) . . ?
C2 C1 H1 118.3 . . ?
C1 C2 H2 121.3 . . ?
C3 C2 C1 117.4(5) . . ?
C3 C2 H2 121.3 . . ?
C2 C3 H3 119.9 . . ?
C4 C3 C2 120.3(5) . . ?
C4 C3 H3 119.9 . . ?
C3 C4 H4 120.3 . . ?
C3 C4 C5 119.3(5) . . ?
C5 C4 H4 120.3 . . ?
N1 C5 C4 120.8(4) . . ?
N1 C5 C6 115.5(4) . . ?
C4 C5 C6 123.6(4) . . ?
N2 C6 C5 115.6(4) . . ?
N2 C6 C7 120.8(4) . . ?
C7 C6 C5 123.6(4) . . ?
C6 C7 H7 120.2 . . ?
C8 C7 C6 119.6(5) . . ?
C8 C7 H7 120.2 . . ?
C7 C8 H8 120.0 . . ?
C7 C8 C9 120.0(4) . . ?
C9 C8 H8 120.0 . . ?
C8 C9 H9 121.1 . . ?
C8 C9 C10 117.8(4) . . ?
C10 C9 H9 121.1 . . ?
N2 C10 C9 122.7(4) . . ?
N2 C10 H10 118.7 . . ?
C9 C10 H10 118.7 . . ?
Si1 C11 H11A 109.5 . . ?
Si1 C11 H11B 109.5 . . ?
Si1 C11 H11C 109.5 . . ?
H11A C11 H11B 109.5 . . ?
H11A C11 H11C 109.5 . . ?
H11B C11 H11C 109.5 . . ?
Si1 C12 H12A 109.5 . . ?
Si1 C12 H12B 109.5 . . ?
Si1 C12 H12C 109.5 . . ?
H12A C12 H12B 109.5 . . ?
H12A C12 H12C 109.5 . . ?
H12B C12 H12C 109.5 . . ?
Si1 C13 H13A 109.5 . . ?
Si1 C13 H13B 109.5 . . ?
Si1 C13 H13C 109.5 . . ?
H13A C13 H13B 109.5 . . ?
H13A C13 H13C 109.5 . . ?
H13B C13 H13C 109.5 . . ?
Si2 C14 H14A 109.5 . . ?
Si2 C14 H14B 109.5 . . ?
Si2 C14 H14C 109.5 . . ?
H14A C14 H14B 109.5 . . ?
H14A C14 H14C 109.5 . . ?
H14B C14 H14C 109.5 . . ?
Si2 C15 H15A 109.5 . . ?
Si2 C15 H15B 109.5 . . ?
Si2 C15 H15C 109.5 . . ?
H15A C15 H15B 109.5 . . ?
H15A C15 H15C 109.5 . . ?
H15B C15 H15C 109.5 . . ?
Si2 C16 H16A 109.5 . . ?
Si2 C16 H16B 109.5 . . ?
Si2 C16 H16C 109.5 . . ?
H16A C16 H16B 109.5 . . ?
H16A C16 H16C 109.5 . . ?
H16B C16 H16C 109.5 . . ?
Si3 C17 H17A 109.5 . . ?
Si3 C17 H17B 109.5 . . ?
Si3 C17 H17C 109.5 . . ?
H17A C17 H17B 109.5 . . ?
H17A C17 H17C 109.5 . . ?
H17B C17 H17C 109.5 . . ?
Si3 C18 H18A 109.5 . . ?
Si3 C18 H18B 109.5 . . ?
Si3 C18 H18C 109.5 . . ?
H18A C18 H18B 109.5 . . ?
H18A C18 H18C 109.5 . . ?
H18B C18 H18C 109.5 . . ?
Si3 C19 H19A 109.5 . . ?
Si3 C19 H19B 109.5 . . ?
Si3 C19 H19C 109.5 . . ?
H19A C19 H19B 109.5 . . ?
H19A C19 H19C 109.5 . . ?
H19B C19 H19C 109.5 . . ?
Si4 C20 H20A 109.5 . . ?
Si4 C20 H20B 109.5 . . ?
Si4 C20 H20C 109.5 . . ?
H20A C20 H20B 109.5 . . ?
H20A C20 H20C 109.5 . . ?
H20B C20 H20C 109.5 . . ?
Si4 C21 H21A 109.5 . . ?
Si4 C21 H21B 109.5 . . ?
Si4 C21 H21C 109.5 . . ?
H21A C21 H21B 109.5 . . ?
H21A C21 H21C 109.5 . . ?
H21B C21 H21C 109.5 . . ?
Si4 C22 H22A 109.5 . . ?
Si4 C22 H22B 109.5 . . ?
Si4 C22 H22C 109.5 . . ?
H22A C22 H22B 109.5 . . ?
H22A C22 H22C 109.5 . . ?
H22B C22 H22C 109.5 . . ?
N5 Zn2 N6 75.18(14) . . ?
N7 Zn2 N5 100.69(14) . . ?
N7 Zn2 N6 121.70(14) . . ?
N8 Zn2 N5 119.84(14) . . ?
N8 Zn2 N6 99.25(14) . . ?
N8 Zn2 N7 128.80(15) . . ?
N7 Si5 C42 112.5(2) . . ?
N7 Si5 C43 112.84(19) . . ?
N7 Si5 C44 114.5(2) . . ?
C42 Si5 C43 106.0(2) . . ?
C42 Si5 C44 104.9(2) . . ?
C43 Si5 C44 105.4(2) . . ?
N7 Si6 C39 114.2(2) . . ?
N7 Si6 C40 111.9(2) . . ?
N7 Si6 C41 113.69(19) . . ?
C40 Si6 C39 105.4(2) . . ?
C41 Si6 C39 106.1(2) . . ?
C41 Si6 C40 104.9(2) . . ?
N8 Si7 C36 112.0(2) . . ?
N8 Si7 C37 112.87(19) . . ?
N8 Si7 C38 113.2(2) . . ?
C37 Si7 C36 105.3(2) . . ?
C37 Si7 C38 105.6(2) . . ?
C38 Si7 C36 107.3(2) . . ?
N8 Si8 C33 112.6(2) . . ?
N8 Si8 C34 112.6(2) . . ?
N8 Si8 C35 112.4(2) . . ?
C33 Si8 C34 108.2(2) . . ?
C33 Si8 C35 106.5(3) . . ?
C35 Si8 C34 104.0(2) . . ?
C23 N5 Zn2 124.0(3) . . ?
C23 N5 C27 118.6(4) . . ?
C27 N5 Zn2 117.2(3) . . ?
C28 N6 Zn2 115.2(3) . . ?
C32 N6 Zn2 124.9(3) . . ?
C32 N6 C28 117.9(4) . . ?
Si5 N7 Zn2 114.91(19) . . ?
Si6 N7 Zn2 116.62(18) . . ?
Si6 N7 Si5 128.4(2) . . ?
Si7 N8 Zn2 117.7(2) . . ?
Si7 N8 Si8 122.4(2) . . ?
Si8 N8 Zn2 118.8(2) . . ?
N5 C23 H23 118.6 . . ?
N5 C23 C24 122.8(5) . . ?
C24 C23 H23 118.6 . . ?
C23 C24 H24 121.1 . . ?
C25 C24 C23 117.8(5) . . ?
C25 C24 H24 121.1 . . ?
C24 C25 H25 119.8 . . ?
C26 C25 C24 120.3(5) . . ?
C26 C25 H25 119.8 . . ?
C25 C26 H26 120.4 . . ?
C25 C26 C27 119.1(5) . . ?
C27 C26 H26 120.4 . . ?
N5 C27 C26 121.2(5) . . ?
N5 C27 C28 115.5(4) . . ?
C26 C27 C28 123.3(5) . . ?
N6 C28 C27 115.6(4) . . ?
N6 C28 C29 121.6(4) . . ?
C29 C28 C27 122.8(4) . . ?
C28 C29 H29 120.4 . . ?
C30 C29 C28 119.3(4) . . ?
C30 C29 H29 120.4 . . ?
C29 C30 H30 120.5 . . ?
C29 C30 C31 119.0(5) . . ?
C31 C30 H30 120.5 . . ?
C30 C31 H31 120.8 . . ?
C32 C31 C30 118.3(5) . . ?
C32 C31 H31 120.8 . . ?
N6 C32 C31 123.9(4) . . ?
N6 C32 H32 118.0 . . ?
C31 C32 H32 118.0 . . ?
Si8 C33 H33A 109.5 . . ?
Si8 C33 H33B 109.5 . . ?
Si8 C33 H33C 109.5 . . ?
H33A C33 H33B 109.5 . . ?
H33A C33 H33C 109.5 . . ?
H33B C33 H33C 109.5 . . ?
Si8 C34 H34A 109.5 . . ?
Si8 C34 H34B 109.5 . . ?
Si8 C34 H34C 109.5 . . ?
H34A C34 H34B 109.5 . . ?
H34A C34 H34C 109.5 . . ?
H34B C34 H34C 109.5 . . ?
Si8 C35 H35A 109.5 . . ?
Si8 C35 H35B 109.5 . . ?
Si8 C35 H35C 109.5 . . ?
H35A C35 H35B 109.5 . . ?
H35A C35 H35C 109.5 . . ?
H35B C35 H35C 109.5 . . ?
Si7 C36 H36A 109.5 . . ?
Si7 C36 H36B 109.5 . . ?
Si7 C36 H36C 109.5 . . ?
H36A C36 H36B 109.5 . . ?
H36A C36 H36C 109.5 . . ?
H36B C36 H36C 109.5 . . ?
Si7 C37 H37A 109.5 . . ?
Si7 C37 H37B 109.5 . . ?
Si7 C37 H37C 109.5 . . ?
H37A C37 H37B 109.5 . . ?
H37A C37 H37C 109.5 . . ?
H37B C37 H37C 109.5 . . ?
Si7 C38 H38A 109.5 . . ?
Si7 C38 H38B 109.5 . . ?
Si7 C38 H38C 109.5 . . ?
H38A C38 H38B 109.5 . . ?
H38A C38 H38C 109.5 . . ?
H38B C38 H38C 109.5 . . ?
Si6 C39 H39A 109.5 . . ?
Si6 C39 H39B 109.5 . . ?
Si6 C39 H39C 109.5 . . ?
H39A C39 H39B 109.5 . . ?
H39A C39 H39C 109.5 . . ?
H39B C39 H39C 109.5 . . ?
Si6 C40 H40A 109.5 . . ?
Si6 C40 H40B 109.5 . . ?
Si6 C40 H40C 109.5 . . ?
H40A C40 H40B 109.5 . . ?
H40A C40 H40C 109.5 . . ?
H40B C40 H40C 109.5 . . ?
Si6 C41 H41A 109.5 . . ?
Si6 C41 H41B 109.5 . . ?
Si6 C41 H41C 109.5 . . ?
H41A C41 H41B 109.5 . . ?
H41A C41 H41C 109.5 . . ?
H41B C41 H41C 109.5 . . ?
Si5 C42 H42A 109.5 . . ?
Si5 C42 H42B 109.5 . . ?
Si5 C42 H42C 109.5 . . ?
H42A C42 H42B 109.5 . . ?
H42A C42 H42C 109.5 . . ?
H42B C42 H42C 109.5 . . ?
Si5 C43 H43A 109.5 . . ?
Si5 C43 H43B 109.5 . . ?
Si5 C43 H43C 109.5 . . ?
H43A C43 H43B 109.5 . . ?
H43A C43 H43C 109.5 . . ?
H43B C43 H43C 109.5 . . ?
Si5 C44 H44A 109.5 . . ?
Si5 C44 H44B 109.5 . . ?
Si5 C44 H44C 109.5 . . ?
H44A C44 H44B 109.5 . . ?
H44A C44 H44C 109.5 . . ?
H44B C44 H44C 109.5 . . ?

_shelx_res_file                  
;
    zn9.res created by SHELXL-2014/7

TITL pimx22bo_a.res in Pca2(1)
REM Old TITL pimx22bo in Pbcm
REM SHELXT solution in Pca2(1)
REM R1 0.069, Rweak 0.021, Alpha 0.004, Orientation a'=b, b'=a, c'=-c
REM Flack x = 0.307 ( 0.008 ) from Parsons' quotients
REM Formula found by SHELXT: C45 N7 Si8 Zn2
CELL 0.71073 18.8806 18.056 17.6133 90 90 90
ZERR 4 0.0012 0.0013 0.0017 0 0 0
LATT -1
SYMM -X,-Y,0.5+Z
SYMM 0.5+X,-Y,+Z
SYMM 0.5-X,+Y,0.5+Z
SFAC C H N Si Zn
UNIT 176 352 32 32 8

L.S. 10
PLAN  20
SIZE 0.085 0.189 0.254
TEMP -173.15
BOND $H
list 4
fmap 2
acta
TWIN -1 0 0 0 -1 0 0 0 -1 2
OMIT 0 52
REM <olex2.extras>
REM <HklSrc "%.\\pimx22bo.hkl">
REM </olex2.extras>

WGHT    0.038500
BASF   0.29208
FVAR       0.17652
ZN1   5    0.623357    0.518356    0.639470    11.00000    0.02270    0.01786 =
         0.01847    0.00100    0.00076    0.00032
SI1   4    0.708878    0.666276    0.616374    11.00000    0.03514    0.02045 =
         0.02290   -0.00261    0.00727   -0.00639
SI2   4    0.735785    0.536876    0.512470    11.00000    0.03691    0.02229 =
         0.02633   -0.00349    0.01087   -0.00315
SI3   4    0.693578    0.388518    0.726635    11.00000    0.02403    0.01879 =
         0.01974    0.00070   -0.00081    0.00054
SI4   4    0.549368    0.363365    0.656826    11.00000    0.02479    0.02101 =
         0.02208    0.00185   -0.00037   -0.00306
N1    3    0.532396    0.566493    0.582194    11.00000    0.02447    0.02272 =
         0.02294    0.00222   -0.00275   -0.00093
N2    3    0.561936    0.569598    0.729715    11.00000    0.02490    0.02019 =
         0.02339    0.00205    0.00218    0.00035
N3    3    0.696823    0.575975    0.590159    11.00000    0.02651    0.01795 =
         0.02015    0.00254    0.00196   -0.00210
N4    3    0.623604    0.415484    0.671552    11.00000    0.02575    0.01841 =
         0.02289    0.00266    0.00120    0.00221
C1    1    0.528366    0.573695    0.506954    11.00000    0.03111    0.02861 =
         0.02378    0.00149   -0.00342    0.00008
AFIX  43
H1    2    0.559398    0.544935    0.476403    11.00000   -1.20000
AFIX   0
C2    1    0.481165    0.621050    0.470999    11.00000    0.03674    0.04016 =
         0.03263    0.00722   -0.00667    0.00083
AFIX  43
H2    2    0.479307    0.624537    0.417218    11.00000   -1.20000
AFIX   0
C3    1    0.437108    0.662806    0.516353    11.00000    0.03398    0.04035 =
         0.04607    0.01035   -0.01164    0.00868
AFIX  43
H3    2    0.404414    0.696236    0.493849    11.00000   -1.20000
AFIX   0
C4    1    0.440281    0.656271    0.594146    11.00000    0.02480    0.03513 =
         0.04008    0.00416    0.00161    0.00519
AFIX  43
H4    2    0.409618    0.684678    0.625462    11.00000   -1.20000
AFIX   0
C5    1    0.488771    0.607721    0.626384    11.00000    0.02242    0.01949 =
         0.03328   -0.00009   -0.00092   -0.00038
C6    1    0.500334    0.600919    0.708873    11.00000    0.02855    0.01956 =
         0.03121    0.00113    0.00321   -0.00195
C7    1    0.451824    0.624681    0.763162    11.00000    0.03231    0.03074 =
         0.03866    0.00301    0.00708    0.00791
AFIX  43
H7    2    0.408411    0.646749    0.747939    11.00000   -1.20000
AFIX   0
C8    1    0.467066    0.616052    0.838634    11.00000    0.04389    0.04022 =
         0.03155   -0.00318    0.01657    0.01071
AFIX  43
H8    2    0.434366    0.632515    0.875992    11.00000   -1.20000
AFIX   0
C9    1    0.529660    0.583578    0.860307    11.00000    0.04267    0.03564 =
         0.01833   -0.00076    0.00859    0.00437
AFIX  43
H9    2    0.541045    0.576990    0.912409    11.00000   -1.20000
AFIX   0
C10   1    0.575924    0.560609    0.803316    11.00000    0.03441    0.02158 =
         0.02817    0.00031    0.00162    0.00404
AFIX  43
H10   2    0.619197    0.537607    0.817509    11.00000   -1.20000
AFIX   0
C11   1    0.634154    0.727334    0.585357    11.00000    0.05027    0.01884 =
         0.06593   -0.00303    0.00482    0.00130
AFIX 137
H11A  2    0.627852    0.723010    0.530307    11.00000   -1.50000
H11B  2    0.644984    0.778862    0.598424    11.00000   -1.50000
H11C  2    0.590509    0.712094    0.611102    11.00000   -1.50000
AFIX   0
C12   1    0.791466    0.708714    0.575572    11.00000    0.04518    0.03356 =
         0.04246   -0.00992    0.01365   -0.01871
AFIX 137
H12A  2    0.833075    0.682503    0.595178    11.00000   -1.50000
H12B  2    0.794027    0.761018    0.590176    11.00000   -1.50000
H12C  2    0.790343    0.704740    0.520095    11.00000   -1.50000
AFIX   0
C13   1    0.715776    0.678994    0.722198    11.00000    0.09867    0.03834 =
         0.02772   -0.01152    0.01233   -0.02898
AFIX 137
H13A  2    0.672472    0.660710    0.746482    11.00000   -1.50000
H13B  2    0.721837    0.731692    0.733820    11.00000   -1.50000
H13C  2    0.756609    0.651200    0.741381    11.00000   -1.50000
AFIX   0
C14   1    0.724193    0.593392    0.424000    11.00000    0.10954    0.03292 =
         0.02467   -0.00479    0.01330   -0.00878
AFIX 137
H14A  2    0.674150    0.593420    0.409232    11.00000   -1.50000
H14B  2    0.752659    0.571946    0.382996    11.00000   -1.50000
H14C  2    0.739713    0.644340    0.433545    11.00000   -1.50000
AFIX   0
C15   1    0.833126    0.520260    0.524000    11.00000    0.03901    0.05656 =
         0.07043   -0.02760    0.01809    0.00099
AFIX 137
H15A  2    0.857257    0.567570    0.532629    11.00000   -1.50000
H15B  2    0.851888    0.497042    0.477904    11.00000   -1.50000
H15C  2    0.841159    0.487475    0.567497    11.00000   -1.50000
AFIX   0
C16   1    0.696381    0.443663    0.488991    11.00000    0.04874    0.02092 =
         0.03072   -0.00639    0.00868    0.00150
AFIX 137
H16A  2    0.700914    0.410754    0.532968    11.00000   -1.50000
H16B  2    0.721558    0.422146    0.445622    11.00000   -1.50000
H16C  2    0.646196    0.449656    0.476184    11.00000   -1.50000
AFIX   0
C17   1    0.758446    0.465468    0.741376    11.00000    0.02834    0.02741 =
         0.03349    0.00392   -0.00175    0.00083
AFIX 137
H17A  2    0.796661    0.448509    0.774775    11.00000   -1.50000
H17B  2    0.734339    0.507781    0.764754    11.00000   -1.50000
H17C  2    0.778329    0.480436    0.692325    11.00000   -1.50000
AFIX   0
C18   1    0.747169    0.310353    0.685542    11.00000    0.03230    0.02565 =
         0.02870    0.00073    0.00031    0.00380
AFIX 137
H18A  2    0.716483    0.267305    0.677399    11.00000   -1.50000
H18B  2    0.785251    0.297129    0.720834    11.00000   -1.50000
H18C  2    0.767689    0.325909    0.636986    11.00000   -1.50000
AFIX   0
C19   1    0.664389    0.359321    0.824423    11.00000    0.02987    0.02460 =
         0.02510    0.00375   -0.00288    0.00137
AFIX 137
H19A  2    0.643645    0.401828    0.850928    11.00000   -1.50000
H19B  2    0.705351    0.341099    0.853038    11.00000   -1.50000
H19C  2    0.628986    0.319847    0.820178    11.00000   -1.50000
AFIX   0
C20   1    0.564829    0.260644    0.665788    11.00000    0.03685    0.02534 =
         0.03549    0.00232   -0.00549   -0.00641
AFIX 137
H20A  2    0.595846    0.243949    0.624589    11.00000   -1.50000
H20B  2    0.519418    0.234533    0.662670    11.00000   -1.50000
H20C  2    0.587263    0.250023    0.714767    11.00000   -1.50000
AFIX   0
C21   1    0.513926    0.374912    0.557755    11.00000    0.03014    0.03140 =
         0.03276    0.00213   -0.01052   -0.00691
AFIX 137
H21A  2    0.499860    0.426589    0.549880    11.00000   -1.50000
H21B  2    0.472715    0.342630    0.550755    11.00000   -1.50000
H21C  2    0.550734    0.361535    0.520999    11.00000   -1.50000
AFIX   0
C22   1    0.475268    0.388394    0.723704    11.00000    0.02969    0.04260 =
         0.04016   -0.00417    0.00637   -0.00775
AFIX 137
H22A  2    0.491616    0.383160    0.776239    11.00000   -1.50000
H22B  2    0.434929    0.355305    0.715021    11.00000   -1.50000
H22C  2    0.460712    0.439736    0.714642    11.00000   -1.50000
AFIX   0

ZN2   5    0.607078    0.039855    0.383892    11.00000    0.02310    0.01885 =
         0.01994   -0.00141    0.00031   -0.00091
SI5   4    0.717338    0.160313    0.422090    11.00000    0.02468    0.01843 =
         0.02258    0.00049   -0.00157   -0.00188
SI6   4    0.695951    0.030627    0.532376    11.00000    0.02587    0.02122 =
         0.02058    0.00068   -0.00024   -0.00130
SI7   4    0.662076   -0.111380    0.320943    11.00000    0.04152    0.02079 =
         0.02421   -0.00203    0.00074    0.00475
SI8   4    0.506350   -0.094254    0.347870    11.00000    0.03584    0.02598 =
         0.02540   -0.00229   -0.00061   -0.00958
N5    3    0.518124    0.110011    0.410223    11.00000    0.02547    0.02482 =
         0.02417   -0.00290    0.00091   -0.00413
N6    3    0.580428    0.094188    0.276239    11.00000    0.02477    0.01979 =
         0.02246    0.00027   -0.00073   -0.00126
N7    3    0.678490    0.080318    0.452358    11.00000    0.02490    0.01997 =
         0.01837   -0.00294   -0.00376   -0.00234
N8    3    0.591356   -0.062409    0.354608    11.00000    0.03293    0.01954 =
         0.02248   -0.00318   -0.00037   -0.00247
C23   1    0.494612    0.122850    0.480970    11.00000    0.02913    0.03455 =
         0.02857   -0.00399   -0.00147   -0.00126
AFIX  43
H23   2    0.516888    0.097928    0.522034    11.00000   -1.20000
AFIX   0
C24   1    0.439397    0.170762    0.496632    11.00000    0.03804    0.05098 =
         0.03406   -0.01750    0.00902    0.00560
AFIX  43
H24   2    0.423612    0.178598    0.547212    11.00000   -1.20000
AFIX   0
C25   1    0.408070    0.206721    0.436474    11.00000    0.04360    0.05747 =
         0.05025   -0.01213    0.00034    0.02395
AFIX  43
H25   2    0.369130    0.238947    0.445158    11.00000   -1.20000
AFIX   0
C26   1    0.432679    0.196305    0.364397    11.00000    0.04096    0.04774 =
         0.04113   -0.00736   -0.00437    0.01769
AFIX  43
H26   2    0.412123    0.222305    0.323007    11.00000   -1.20000
AFIX   0
C27   1    0.488282    0.147096    0.352340    11.00000    0.02720    0.02848 =
         0.03256   -0.00821   -0.00206   -0.00249
C28   1    0.519483    0.132631    0.276342    11.00000    0.02397    0.02385 =
         0.02855   -0.00244   -0.00319   -0.00419
C29   1    0.487697    0.156490    0.208678    11.00000    0.03206    0.02786 =
         0.03368    0.00303   -0.00580    0.00091
AFIX  43
H29   2    0.444509    0.183460    0.209905    11.00000   -1.20000
AFIX   0
C30   1    0.519710    0.140429    0.140560    11.00000    0.04332    0.03213 =
         0.02702    0.00450   -0.00772   -0.00445
AFIX  43
H30   2    0.499308    0.156651    0.094146    11.00000   -1.20000
AFIX   0
C31   1    0.582074    0.100291    0.140643    11.00000    0.03590    0.03496 =
         0.02182    0.00013    0.00366   -0.00115
AFIX  43
H31   2    0.605308    0.088228    0.094427    11.00000   -1.20000
AFIX   0
C32   1    0.609649    0.078252    0.209361    11.00000    0.02787    0.02633 =
         0.02833   -0.00216    0.00159   -0.00130
AFIX  43
H32   2    0.652077    0.049970    0.209084    11.00000   -1.20000
AFIX   0
C33   1    0.464051   -0.070755    0.254623    11.00000    0.03858    0.03177 =
         0.03919   -0.00331   -0.00388   -0.01070
AFIX 137
H33A  2    0.461174   -0.016819    0.249235    11.00000   -1.50000
H33B  2    0.416290   -0.091926    0.252740    11.00000   -1.50000
H33C  2    0.492581   -0.091238    0.213155    11.00000   -1.50000
AFIX   0
C34   1    0.499966   -0.197758    0.361975    11.00000    0.05977    0.03814 =
         0.03329    0.00454   -0.00658   -0.02241
AFIX 137
H34A  2    0.529502   -0.222937    0.324198    11.00000   -1.50000
H34B  2    0.450608   -0.213496    0.355970    11.00000   -1.50000
H34C  2    0.516477   -0.210534    0.413073    11.00000   -1.50000
AFIX   0
C35   1    0.447309   -0.054931    0.423698    11.00000    0.03759    0.05326 =
         0.04279   -0.00856    0.00759   -0.01993
AFIX 137
H35A  2    0.473451   -0.052186    0.471683    11.00000   -1.50000
H35B  2    0.405808   -0.086925    0.430096    11.00000   -1.50000
H35C  2    0.431875   -0.005172    0.408864    11.00000   -1.50000
AFIX   0
C36   1    0.645036   -0.149746    0.223034    11.00000    0.05690    0.03470 =
         0.02956   -0.00730    0.00251    0.01170
AFIX 137
H36A  2    0.608343   -0.188037    0.225856    11.00000   -1.50000
H36B  2    0.688788   -0.171357    0.202899    11.00000   -1.50000
H36C  2    0.629122   -0.109781    0.189474    11.00000   -1.50000
AFIX   0
C37   1    0.744366   -0.053422    0.311471    11.00000    0.03787    0.03441 =
         0.03141    0.00373    0.00741    0.01047
AFIX 137
H37A  2    0.737249   -0.016015    0.271884    11.00000   -1.50000
H37B  2    0.784413   -0.085225    0.297683    11.00000   -1.50000
H37C  2    0.754318   -0.028826    0.359908    11.00000   -1.50000
AFIX   0
C38   1    0.687597   -0.191593    0.383684    11.00000    0.05823    0.02863 =
         0.03852   -0.00051   -0.00409    0.00635
AFIX 137
H38A  2    0.693379   -0.174171    0.436014    11.00000   -1.50000
H38B  2    0.732296   -0.212928    0.365753    11.00000   -1.50000
H38C  2    0.650387   -0.229394    0.381914    11.00000   -1.50000
AFIX   0
C39   1    0.779499   -0.026201    0.527227    11.00000    0.03726    0.03441 =
         0.02935    0.00429   -0.00209    0.00629
AFIX 137
H39A  2    0.773754   -0.065377    0.489214    11.00000   -1.50000
H39B  2    0.788937   -0.048532    0.576920    11.00000   -1.50000
H39C  2    0.819266    0.005745    0.512869    11.00000   -1.50000
AFIX   0
C40   1    0.623296   -0.037389    0.554283    11.00000    0.03794    0.02910 =
         0.02897    0.00649   -0.00053   -0.00468
AFIX 137
H40A  2    0.580130   -0.010442    0.568126    11.00000   -1.50000
H40B  2    0.637833   -0.069089    0.596673    11.00000   -1.50000
H40C  2    0.614075   -0.068069    0.509462    11.00000   -1.50000
AFIX   0
C41   1    0.703990    0.088959    0.620167    11.00000    0.03507    0.03402 =
         0.02276    0.00038   -0.00604    0.00074
AFIX 137
H41A  2    0.748153    0.117410    0.618168    11.00000   -1.50000
H41B  2    0.704325    0.056879    0.665046    11.00000   -1.50000
H41C  2    0.663690    0.123042    0.623123    11.00000   -1.50000
AFIX   0
C42   1    0.651312    0.236368    0.405312    11.00000    0.03253    0.02025 =
         0.05026    0.00164   -0.00196   -0.00240
AFIX 137
H42A  2    0.621656    0.223766    0.361514    11.00000   -1.50000
H42B  2    0.676429    0.282846    0.395277    11.00000   -1.50000
H42C  2    0.621399    0.242179    0.450391    11.00000   -1.50000
AFIX   0
C43   1    0.766769    0.148700    0.330081    11.00000    0.03907    0.02782 =
         0.02755    0.00441    0.00416   -0.00614
AFIX 137
H43A  2    0.802591    0.109822    0.335815    11.00000   -1.50000
H43B  2    0.789974    0.195453    0.316668    11.00000   -1.50000
H43C  2    0.733485    0.134776    0.289843    11.00000   -1.50000
AFIX   0
C44   1    0.783534    0.200893    0.490610    11.00000    0.03835    0.03126 =
         0.03304    0.00498   -0.00564   -0.01122
AFIX 137
H44A  2    0.759707    0.213122    0.538425    11.00000   -1.50000
H44B  2    0.804120    0.245908    0.468717    11.00000   -1.50000
H44C  2    0.821177    0.164740    0.500300    11.00000   -1.50000
AFIX   0
HKLF 4

REM  pimx22bo_a.res in Pca2(1)
REM R1 =  0.0340 for    9936 Fo > 4sig(Fo)  and  0.0445 for all   11789 data
REM    584 parameters refined using      1 restraints

END

WGHT      0.0385      0.0000

REM Highest difference peak  0.580,  deepest hole -0.215,  1-sigma level  0.066
Q1    1   0.5715  0.5183  0.6362  11.00000  0.05    0.58
Q2    1   0.6740  0.5191  0.6497  11.00000  0.05    0.58
Q3    1   0.6580  0.0434  0.3862  11.00000  0.05    0.55
Q4    1   0.6293  0.0444  0.4350  11.00000  0.05    0.54
Q5    1   0.5693  0.0437  0.3455  11.00000  0.05    0.54
Q6    1   0.6253  0.0430  0.3353  11.00000  0.05    0.54
Q7    1   0.6386  0.5124  0.6902  11.00000  0.05    0.53
Q8    1   0.5576  0.0426  0.4058  11.00000  0.05    0.50
Q9    1   0.6038  0.5158  0.6899  11.00000  0.05    0.48
Q10   1   0.6023  0.5174  0.5893  11.00000  0.05    0.45
Q11   1   0.6339  0.0997  0.3893  11.00000  0.05    0.39
Q12   1   0.4906 -0.0907  0.2990  11.00000  0.05    0.37
Q13   1   0.5961 -0.0123  0.3803  11.00000  0.05    0.37
Q14   1   0.5281  0.3664  0.6052  11.00000  0.05    0.37
Q15   1   0.5538 -0.1007  0.3279  11.00000  0.05    0.37
Q16   1   0.6239 -0.1099  0.3551  11.00000  0.05    0.37
Q17   1   0.6414  0.3936  0.7207  11.00000  0.05    0.36
Q18   1   0.7486  0.1655  0.4607  11.00000  0.05    0.36
Q19   1   0.7464  0.0230  0.5257  11.00000  0.05    0.35
Q20   1   0.6293  0.4618  0.6429  11.00000  0.05    0.35
;
_shelx_res_checksum              54617
_shelx_hkl_file                  
;
   2  -1  22    3.20   14.70
   2   0  22    6.20   14.00
   1  -3  21   24.00   13.90
   1  -2  21   16.20   14.70
   1  -1  21   -7.60   10.50
   2   2  21   39.20   12.80
   3   4  21   44.30   12.90
   4   6  21    9.70    9.50
   0  -8  20   -0.30   11.00
   0  -7  20   46.70   10.30
   0  -6  20   12.80   12.90
   0  -5  20   31.40   10.20
   0  -4  20  180.48   10.70
   1   0  20   -2.10   12.10
   1   1  20   13.60    9.00
   2   3  20    2.50   12.20
   3   5  20   32.50   11.70
   4   7  20   21.70    8.60
   5   8  20   24.60   11.50
   0 -10  19    3.10   15.50
   0  -9  19    6.30   12.60
   0  -2  19   -6.30   12.20
   0  -1  19   -4.90    8.40
   1   2  19   51.69   10.40
   2   4  19   75.99   10.20
   3   6  19   58.09   10.40
   5   9  19   25.00    9.20
   6  10  19    5.50   10.00
   0 -12  18   48.70   15.20
  -1  -7  18  128.09    9.40
  -1  -6  18   13.60    8.50
  -1  -5  18   88.09    8.10
   0   0  18   28.00   10.30
   1   3  18   59.99    9.50
   2   5  18   22.40    9.10
   3   7  18  160.78    9.40
   0 -13  17   10.70   14.60
  -1 -10  17   62.59    9.10
  -1  -9  17   29.60   11.80
  -1  -8  17   14.00   10.70
  -1  -3  17   66.09   10.00
  -1  -2  17   46.90    7.10
   0   2  17    9.60    6.80
   1   4  17   48.10    8.50
   2   6  17   62.69    8.60
   4   9  17   18.60    7.90
   5  10  17   32.90    7.70
   6  11  17    7.60    8.30
   7  12  17   11.70    7.40
   0 -14  16    1.20   14.20
  -1 -11  16  104.89   11.70
  -1  -1  16   22.90    8.90
  -1   0  16   -1.40    6.10
   0   3  16   40.90    6.10
   1   5  16   11.30    7.60
   3   8  16   95.99    6.90
   0 -15  15    1.90   13.20
  -1 -12  15   43.10   12.10
  -2  -6  15  114.39    6.90
  -2  -5  15   87.59    6.40
  -1   1  15   20.60    5.50
   2   7  15   39.00    6.40
   5  11  15   23.70    5.80
   6  12  15   11.90    5.70
  -1 -13  14   14.70   10.50
  -2  -9  14   56.19    6.80
  -2  -8  14   29.80    9.30
  -2  -7  14    5.30    8.90
  -2  -6  14   72.29    8.40
  -2  -5  14   18.20    8.40
  -2  -4  14   41.50    8.00
  -2  -3  14   16.20    5.40
   0   4  14  100.99    6.90
   1   6  14  156.58    6.30
   3   9  14  152.78    5.70
   7  13  14   10.50    5.20
   1 -18  13   52.79   11.80
   0 -16  13  -12.20   11.80
  -2 -10  13   71.69    6.40
  -2  -9  13   -0.60    8.40
  -2  -2  13   45.10    7.10
  -1   2  13  118.89    6.40
   2   8  13  130.59    5.10
   8  14  13   19.70    4.50
   1 -18  12   21.30   11.90
   0 -16  12   65.29   10.30
  -1 -14  12    9.40    9.30
  -2 -10  12   99.09    8.20
  -2  -1  12   41.80    6.20
   0   5  12    3.70    3.60
  -1 -14  11   18.70    8.90
  -2 -11  11   47.30    7.40
  -2  -1  11  133.09    5.70
  -1   3  11  242.38    4.00
   0   5  11   -3.80    4.60
   1   7  11   33.60    3.90
  -2 -11  10   65.89    7.50
  -2   0  10 1153.58    5.90
  -1   3  10   71.59    4.70
   1   7  10  152.98    4.00
   5  12  10   41.40    2.80
  -2 -11   9  108.89    6.90
  -2   0   9  327.27    4.20
  -1   3   9  123.09    4.40
   1   7   9   56.49    3.40
   4  11   9   69.09    2.50
   5  12   9   -1.20    2.30
   2 -20   8    3.90    9.30
  -2 -11   8   51.79    6.00
  -1   3   8   75.39    2.80
   1   7   8  195.98    2.80
   3 -21   7   55.89    9.60
  -2 -11   7  102.99    4.10
  -2  -1   7  321.77    4.70
   0   5   7   -1.70    2.60
   3 -21   6   14.40    8.00
   1 -18   6   53.09    6.60
   0 -16   6   58.69    6.90
  -2 -10   6   12.20    4.60
  -2  -9   5  159.58    4.30
  -2  -2   5   67.39    2.60
  -1   2   5  256.57    2.30
   2 -19   4    2.60    5.40
  -2  -7   4   50.69    3.70
  -2  -6   4    4.00    3.40
  -2  -5   4   16.50    3.30
  -2  -4   4  423.26    3.10
   8  14   4   68.59    3.30
   5  11   3  464.85    2.40
   6  12   3  121.59    2.70
  10  15   3   75.69    4.50
  14  17   3    5.60    7.00
   1 -16   2   95.39    4.20
  -1  -1   2  171.38    2.30
   9  14   2    6.50    4.20
  -1  -8   1  411.16    2.50
   1   4   1  363.76    1.00
   7  12   1  289.57    3.90
   3 -18   0   27.10    3.80
   1   3   0  226.48    1.50
  12  15   0    2.80    7.10
  14  16   0   15.40    8.50
   0  -9  -1   -2.80    1.30
   3   6  -1  262.37    3.00
  13  15  -1   39.30    7.20
   1   0  -2   -1.40    2.10
   3   5  -2 1543.65    4.20
   5   8  -2  180.38    3.50
   8  11  -2   53.49    4.50
   9  12  -2   56.99    5.60
  12  14  -2   21.50    7.50
  14  15  -2   -1.20    8.70
   1  -9  -3  132.09    0.60
   5   7  -3  632.44    4.50
  10  12  -3    2.40    5.60
  16  15  -3   66.89   10.60
   2  -1  -4  175.28    3.20
   3   2  -4   81.69    2.60
   5   6  -4  195.68    4.50
  11  12  -4   25.30    6.30
  13  13  -4   57.39    7.80
  15  14  -4    3.20    9.70
   7 -19  -5   17.20    2.30
   3   0  -5   -4.80    3.60
   6   6  -5    7.30    3.40
  11  11  -5    4.20    7.00
  17  14  -5   30.80   12.10
   9 -20  -6    5.70    3.80
   8 -19  -6    6.50    3.60
   3  -8  -6    4.70    2.60
   3  -7  -6  363.06    3.00
   3  -4  -6  186.68    3.30
   5   3  -6  308.57    5.20
   7   6  -6   44.20    3.70
  11  10  -6   36.50    7.20
  14  12  -6   34.60    9.80
  16  13  -6    4.40   10.30
   4  -9  -7  191.18    3.80
   4  -3  -7  247.38    4.40
   5   1  -7  206.08    5.20
   6   3  -7  846.62    6.80
   8   6  -7   23.20    5.90
   9   7  -7  325.17    5.70
  10   8  -7   24.20    5.10
  11   9  -7  165.08    8.20
  14  11  -7   10.60    9.30
  16  12  -7   50.49   11.60
   8 -16  -8   27.40    4.70
   5  -9  -8    3.00    3.60
   5  -3  -8  118.09    4.70
   6   1  -8   32.10    5.20
   7   3  -8   56.79    6.00
  10   7  -8  126.49    7.60
  11   8  -8  310.27    8.00
  14  10  -8   50.79   10.00
  16  11  -8   17.40   12.30
  10 -17  -9   17.00    6.50
   8 -14  -9   99.79    4.90
   7 -12  -9   70.19    4.80
   6  -8  -9   67.19    4.60
   6  -7  -9  106.39    3.60
   6  -5  -9  229.08    3.90
   6  -4  -9  197.28    5.10
   6  -3  -9  326.97    5.70
   7   0  -9   -2.40    3.90
   9   4  -9  193.98    7.30
  10   5  -9  192.48    5.70
  12   7  -9  -10.10    6.00
  13   8  -9   88.29    9.80
  16  10  -9   37.20   11.60
  17  10  -9   20.00   10.20
  11 -16 -10   42.50    7.20
  10 -15 -10    5.20    7.50
   8 -11 -10   84.19    5.70
   7  -7 -10  308.97    6.00
   7  -6 -10  282.47    6.10
   7  -5 -10  373.66    6.20
   8  -1 -10  336.07    5.70
   9   2 -10   -6.80    6.90
  10   3 -10   67.49    5.70
  14   7 -10   14.70    7.70
  15   8 -10    6.50   12.20
  17   9 -10    7.20   13.70
  12 -15 -11   -2.80    8.00
  11 -14 -11    7.20    7.40
  10 -12 -11   21.70    7.10
   9 -10 -11   79.19    6.90
   9  -9 -11    7.30    5.00
   9  -2 -11    8.90    7.20
  10   1 -11   51.99    7.30
  11   2 -11   83.39    6.00
  13   5 -11    2.90    9.10
  15   6 -11   91.29    8.40
  16   7 -11   23.30   12.50
  18   8 -11   13.10   15.40
  13 -14 -12    2.30   10.10
  11 -11 -12   19.70    7.70
  11 -10 -12  114.09    8.10
  10  -7 -12   60.59    7.90
  10  -6 -12   19.50    8.00
  10  -5 -12   31.10    8.30
  10  -4 -12   28.90    7.40
  11  -1 -12   43.10    8.40
  12   1 -12   61.19    9.60
  13   2 -12    6.60    7.20
  15   4 -12    2.00    8.50
  16   5 -12   -1.70   11.90
  17   6 -12   19.50   13.50
  18   6 -12    8.20   11.80
  14 -12 -13    6.00   11.40
  13 -11 -13    8.60    9.60
  13 -10 -13   57.59    9.80
  12  -8 -13   19.80    9.10
  12  -7 -13   -3.90    9.40
  12  -6 -13   27.80    9.40
  12  -5 -13   13.20    9.50
  12  -4 -13   76.09    9.90
  13  -2 -13  112.19    8.30
  13  -1 -13   -1.80   10.70
  14   0 -13   50.29    8.20
  14   1 -13  173.28   11.10
  15   2 -13    7.80   12.10
  16   3 -13   16.30   12.90
  18   4 -13   43.00   14.50
  15  -9 -14   64.29   12.70
  15  -8 -14    6.60   11.90
  15  -7 -14   43.80   10.00
  15  -4 -14   -3.70    9.30
  15  -3 -14   53.89   12.80
  15  -2 -14    3.20   12.90
  16  -1 -14   18.20   13.30
  17   0 -14    2.10   11.10
  17   1 -14   10.00   13.40
  18   1 -14    8.10   15.60
   2  -2  22  -15.40   14.70
   1  -7  21   46.20   12.30
   1  -6  21    8.90   14.90
   1  -5  21   49.50   14.70
   1  -4  21   14.70   11.60
   2   0  21    2.50   12.70
   2   1  21   95.79   10.60
   3   3  21  117.89   13.90
   4   5  21   14.20   12.50
   1  -1  20    8.10   12.80
   2   2  20    3.20   11.20
   4   6  20   52.19   11.10
   0  -8  19   -1.90   10.40
   0  -7  19  -19.70   12.80
   0  -6  19   -5.00   12.70
   0  -5  19    1.10   12.00
   0  -4  19   -1.60   11.70
   0  -3  19   -2.10    9.40
   1   1  19   -2.20   11.40
   4   7  19   19.80   10.30
   0 -11  18   21.00   11.20
   0 -10  18   53.49   14.30
   0  -1  18  112.89   10.50
   4   8  18   50.19    8.60
   5   9  18   14.70    8.30
   0 -12  17    5.50   14.50
  -1  -7  17   18.30    8.10
  -1  -6  17   33.20    8.00
  -1  -5  17   69.49    7.40
  -1  -4  17   54.09    7.20
   0   1  17    1.20    6.80
   3   7  17   32.50    7.60
   0 -13  16   37.70   13.50
  -1 -10  16  117.69    8.30
  -1  -9  16   49.10   10.60
  -1  -8  16   13.40    9.50
  -1  -3  16   21.00    9.20
  -1  -2  16   11.10    8.10
   0   2  16  284.27    8.20
   2   6  16   18.00    6.90
   4   9  16   15.80    6.40
   8  13  16   10.30    7.50
   1 -16  15    2.20   13.20
   0 -14  15   -1.20   12.40
  -1 -11  15   62.69   10.80
  -1 -10  15   36.90    9.80
  -1  -1  15   22.20    7.40
  -1   0  15    0.10    5.50
   0   3  15    0.70    5.40
   1   5  15   35.90    7.00
   1 -17  14   27.50   12.40
   0 -15  14   26.80    9.00
  -1 -12  14   32.20    9.90
  -1   1  14    4.70    5.20
   4  10  14   15.50    5.20
   5  11  14   21.70    5.60
   6  12  14   35.30    5.70
   1 -17  13   23.30   11.30
   0 -15  13    7.80   10.90
  -1 -13  13   43.30    7.30
  -2  -8  13  154.08    6.20
  -2  -7  13   31.70    7.80
  -2  -6  13  112.49    8.10
  -2  -5  13   70.89    7.50
  -2  -4  13   98.49    7.20
  -2  -3  13  256.67    5.80
  -1   1  13   39.90    6.20
   0   4  13   -1.40    5.80
   1   6  13    7.30    5.30
   3   9  13  181.68    5.30
   2 -19  12    1.70   11.80
  -1 -13  12   40.80    9.30
  -2  -9  12   45.40    7.50
  -2  -8  12    9.10    7.60
  -2  -3  12  238.28    6.80
  -2  -2  12   33.30    4.80
  -1   2  12  141.89    4.40
   2   8  12    1.20    4.30
   1 -18  11    0.20   10.00
   0 -16  11    4.60   10.20
  -2 -10  11   53.19    5.50
  -2  -9  11  183.08    7.70
  -2  -2  11  459.85    6.80
  -1   2  11   45.60    4.90
   9  15  11   36.90    2.70
   1 -18  10   48.60   10.40
   0 -16  10  110.79    9.60
  -1 -14  10  198.88    6.30
  -2 -10  10   87.29    7.20
  -2  -1  10   30.20    4.00
   0   5  10  152.48    3.20
   0 -16   9    2.10    8.60
  -1 -14   9  150.68    7.20
  -2 -10   9   99.39    6.60
  -2  -1   9  110.59    5.20
   0   5   9    1.40    3.40
   3 -21   8   48.80   10.00
  -1 -14   8   21.70    5.10
  -2 -10   8   11.00    5.90
  -2  -1   8  405.26    4.20
   0   5   8   28.60    3.00
   1 -18   7  102.69    7.60
  -2 -10   7  276.57    4.40
  12  17   7    9.90    4.00
  -2  -9   6  118.39    4.80
  -2  -2   6  328.27    3.50
  -1   2   6  710.63    4.00
   2 -19   5   26.20    7.20
  -2  -8   5  230.58    4.50
  -2  -7   5  181.38    4.20
  -2  -3   5  598.34    3.60
   9  15   5   14.70    3.30
   3 -20   4   43.80    7.30
   1 -17   4  105.79    5.20
   0 -15   4  101.09    4.40
  -1 -12   4   26.40    4.20
  -1   1   4  582.04    3.30
  11  16   4   10.60    4.40
  13  17   4   15.50    5.90
   5 -22   3   22.80    7.80
   4 -21   3   20.70    6.20
  -1 -11   3  138.69    4.30
  -1   0   3    1.10    2.60
  -1 -10   2  187.38    2.90
  12  16   2   16.70    5.90
   4 -20   1    9.00    4.60
   2 -17   1    9.10    4.00
   1 -15   1   81.09    3.40
  -1  -7   1  485.15    2.80
   2   6   1  206.38    1.50
   4   9   1   85.59    2.30
   8  13   1    2.50    4.40
  11  15   1   -0.10    5.60
  13  16   1   72.49    6.40
   1 -14   0  557.84    3.50
   0 -11   0   68.89    2.00
  10  14   0  191.98    6.10
   6  10  -1  230.38    3.80
   7  11  -1  177.38    4.10
   8  12  -1    2.50    4.60
  11  14  -1   89.49    6.10
  15  16  -1   25.50    8.60
   2   3  -2  330.87    2.30
  16  16  -2   14.80   10.80
   3   4  -3   40.20    3.00
  11  13  -3   49.80    7.50
  13  14  -3   36.90    7.70
  15  15  -3   -2.30    9.70
  14  14  -4    7.80    8.30
  17  15  -4    5.30   11.90
   3 -12  -5   10.90    1.70
   2  -6  -5  521.95    2.90
   4   3  -5  114.69    4.10
   5   5  -5  190.78    4.90
  12  12  -5  128.89    8.00
  14  13  -5   -0.30    6.90
  16  14  -5    9.70   11.30
   7 -18  -6   93.09    3.40
   3  -3  -6   13.20    3.30
   4   1  -6 1593.54    5.60
   6   5  -6   45.20    3.60
  12  11  -6    0.40    5.80
   9 -19  -7   16.80    4.40
   6 -15  -7    0.60    3.60
   4  -2  -7   21.40    4.40
   7   5  -7   70.29    4.00
  12  10  -7    6.60    6.20
  13  11  -7   71.89    8.60
  15  12  -7   10.30   10.60
  18  13  -7   11.30   14.30
   5 -10  -8  147.99    4.30
   5  -2  -8   56.39    3.50
   8   5  -8  128.09    6.30
   9   6  -8   18.30    5.20
  12   9  -8   56.79    8.60
  15  11  -8   32.70   10.90
  17  12  -8   19.70   12.30
  18  12  -8   31.60   13.40
   9 -16  -9   54.09    5.90
   6  -9  -9  105.79    4.70
   6  -2  -9  151.58    5.50
   7   1  -9  111.79    5.90
   8   3  -9  146.29    6.70
  10   6  -9  122.69    7.20
  11   7  -9   13.40    8.10
  14   9  -9   26.90    7.60
  15  10  -9  116.79   11.10
  18  11  -9   14.70   14.00
   9 -14 -10    9.30    6.40
   8 -12 -10  102.79    5.70
   7  -9 -10  101.89    5.20
   7  -8 -10   92.69    5.60
   7  -4 -10   64.09    4.10
   7  -3 -10  279.97    6.30
   8   0 -10   33.50    5.10
  10   4 -10   53.19    7.80
  11   5 -10  107.89    6.30
  12   6 -10  168.78    6.80
  13   7 -10   15.60    9.20
  14   8 -10   57.89   10.70
  16   9 -10   23.60   13.20
  18  10 -10   21.60   15.20
  12 -16 -11   10.60    9.90
  10 -13 -11   56.39    7.20
   9 -11 -11   52.89    6.70
   8  -7 -11    3.20    5.90
   8  -6 -11   74.89    6.70
   8  -5 -11    4.50    6.80
   9  -1 -11   84.99    5.50
  11   3 -11   27.50    7.90
  12   4 -11   52.29    6.90
  14   6 -11   29.90    8.00
  15   7 -11   69.59   12.40
  17   8 -11    2.00   13.80
  12 -13 -12   27.50    8.40
  11 -12 -12   53.89    9.00
  10  -9 -12   66.99    8.10
  10  -8 -12    3.70    5.70
  10  -3 -12  165.68    7.60
  10  -2 -12   68.39    8.10
  11   0 -12   -3.40    8.20
  12   2 -12   91.69    9.70
  13   3 -12   89.59    7.50
  14   4 -12   27.10    8.10
  15   5 -12   25.10   11.10
  16   6 -12   11.30   13.00
  18   7 -12   -1.80   16.70
  13 -12 -13   23.90    9.80
  12 -10 -13   84.79    9.00
  12  -9 -13   17.50    9.70
  12  -3 -13   54.99    7.30
  12  -2 -13   36.60    9.90
  13   0 -13   -0.30    9.80
  14   2 -13   37.70   11.60
  15   3 -13   11.90   12.00
  16   4 -13    4.30   12.20
  17   4 -13    7.80   10.50
  18   5 -13   31.10   15.90
  15 -10 -14    2.50    9.80
  14  -9 -14   16.60   12.00
  14  -8 -14   17.10   11.80
  14  -7 -14    4.70    8.80
  14  -6 -14    5.70    8.90
  14  -5 -14   -0.50    8.60
  14  -4 -14    3.30    8.90
  14  -3 -14   11.60   12.60
  14  -2 -14   27.30   11.30
  15  -1 -14   32.40   11.90
  15   0 -14    6.30   12.00
  16   0 -14   26.50    9.90
  16   1 -14   22.20   13.70
  17   2 -14    4.80   14.70
  18   2 -14   -2.00   12.10
  18   3 -14   16.60   14.70
  17  -4 -15   22.60   14.50
  17  -3 -15    6.90   15.70
  17  -2 -15   43.90   14.50
   3   0  22    6.20   16.30
   2  -1  21   95.19   14.40
   3   2  21   -5.10   13.90
   1  -9  20   21.90   12.00
   1  -8  20   60.49   13.90
   1  -7  20   40.30   14.30
   1  -6  20   30.60   14.20
   1  -5  20   14.80   14.20
   1  -4  20   50.09   13.90
   1  -3  20   34.20   12.30
   1  -2  20    0.60    9.40
   2   1  20    8.60   12.40
   3   4  20   30.10    8.70
   5   7  20   34.10   11.70
   1 -11  19   13.60   15.10
   1 -10  19   32.80   14.40
   1   0  19   12.40   10.90
   2   3  19   67.19    9.90
   3   5  19    6.00   10.50
   5   8  19  110.29   10.40
   6   9  19    8.60   10.90
   1 -13  18   -0.30   11.30
   1 -12  18   24.20   14.30
   0  -9  18   22.80    9.30
   0  -8  18    8.00   11.80
   0  -7  18    2.40   12.00
   0  -6  18   59.39   11.00
   0  -5  18  100.39   10.80
   0  -4  18  129.99   11.10
   0  -3  18  235.88   11.10
   0  -2  18   43.90    8.00
   1   2  18   11.90    7.00
   2   4  18   27.90    9.70
   3   6  18   44.50    9.50
   6  10  18    6.30    8.80
   7  11  18   28.50    8.80
   1 -14  17   -0.90   13.30
   0 -11  17   -1.30   10.10
   0 -10  17  -10.90   12.50
   0  -1  17   -8.30    9.50
   0   0  17   -6.50    6.90
   1   3  17   67.19    6.70
   2   5  17   43.10    8.40
   4   8  17   10.20    7.20
   1 -15  16    4.50   13.20
   0 -12  16   70.39   12.80
  -1  -7  16   11.00    7.20
  -1  -6  16  155.08    7.80
  -1  -5  16   19.80    6.90
  -1  -4  16  231.68    7.50
   0   1  16    0.60    8.40
   1   4  16  222.18    6.30
   5  10  16    5.80    6.80
   6  11  16   24.40    6.80
   7  12  16   56.49    6.90
   0 -13  15    1.10   12.40
  -1  -9  15   90.19   10.20
  -1  -8  15   33.90    9.10
  -1  -3  15   32.00    7.70
  -1  -2  15   -3.00    8.20
   0   2  15    4.70    7.50
   3   8  15  131.59    6.90
   9  14  15   64.09    6.20
   1 -16  14   31.20   13.20
   0 -14  14   96.79   11.20
  -1 -11  14   66.09    7.70
  -1 -10  14   14.70    9.60
  -1  -1  14    9.80    6.90
  -1   0  14    0.70    5.20
   0   3  14  794.52    8.10
   1   5  14  274.67    6.60
   2   7  14   -1.20    5.80
  -1 -12  13   39.60    7.20
  -1 -11  13   35.20    9.00
   4  10  13    4.70    5.40
   7  13  13   40.80    4.60
   1 -17  12   62.09   11.50
   0 -15  12   48.00    9.80
  -1 -12  12   37.80    9.00
  -2  -7  12  123.99    5.50
  -2  -6  12   96.09    5.40
  -2  -5  12   26.30    5.10
  -2  -4  12   40.10    5.00
  -1   1  12   19.00    5.70
   0   4  12  202.68    5.50
   1   6  12  136.99    5.00
   3   9  12    8.60    4.60
   8  14  12    6.10    4.10
   2 -19  11    5.00   11.80
   0 -15  11   -3.30    8.80
  -1 -13  11   79.69    6.00
  -2  -8  11   20.00    6.80
  -2  -7  11  320.47    7.80
  -2  -6  11  171.78    7.00
  -2  -5  11   59.49    6.40
  -2  -4  11  209.88    6.40
  -2  -3  11   58.49    4.80
   2   8  11   14.60    3.80
   2 -19  10   26.20   10.80
  -1 -13  10   20.00    8.10
  -2  -9  10   12.90    5.00
  -2  -8  10   32.60    6.70
  -2  -3  10    6.80    5.70
  -2  -2  10   49.00    4.10
  -1   2  10   70.59    4.70
   2   8  10   24.50    3.90
   9  15  10   19.40    2.40
  -1 -13   9   40.30    7.10
  -2  -9   9   25.70    5.80
  -2  -8   9  255.77    6.10
  -2  -2   9   96.09    4.00
  -1   2   9  739.23    5.40
   2 -19   8   24.50    9.80
  -1 -13   8   97.49    6.90
  -2  -9   8  139.89    5.90
  -2  -2   8  116.09    4.80
  -1   2   8  246.18    4.60
   2 -19   7    8.80    8.50
  -1 -13   7  158.98    6.00
  -2  -9   7  174.18    4.00
  -2  -8   7   23.40    4.80
  -2  -3   7  327.97    4.80
  -2  -2   7  579.84    4.20
  -1   2   7   99.29    3.80
   2 -19   6   20.30    7.20
  -2  -8   6  192.48    4.90
  -2  -7   6   29.50    4.40
  -2  -3   6   14.00    4.00
   2   8   6  160.28    1.70
   1 -17   5   51.89    5.90
   0 -15   5   -1.10    5.10
  -2  -6   5  562.84    4.70
  -2  -5   5  312.67    4.30
  -2  -4   5  336.47    3.40
   0   4   5   -0.60    2.00
   2 -18   3   11.80    5.30
   0 -14   3    3.20    3.70
   0   3   3   -2.40    1.70
   7  13   3   26.30    2.90
   3 -19   2    2.10    4.90
  14  17   2    5.60    7.40
   5 -21   1   27.30    5.40
  -1  -6   1  484.75    2.40
  -1  -5   1  128.59    1.90
  15  17   1   17.60    8.00
   3   7   0   56.69    1.90
   6 -21  -1   31.60    4.00
   3 -17  -1   58.79    2.90
   5   9  -1  165.88    3.00
   9  13  -1   57.89    5.30
   2 -14  -2   82.59    1.80
   4   7  -2   20.90    2.90
  10  13  -2  136.79    5.80
  13  15  -2   29.50    8.20
   1  -2  -3 1190.58    3.00
   4   6  -3   37.40    3.40
   2 -11  -4   35.30    1.00
   7   9  -4   13.90    4.50
   8  10  -4   53.79    5.10
   9  11  -4    5.60    5.70
  12  13  -4    6.80    7.10
  16  15  -4    6.30   10.70
   2  -7  -5  146.59    2.20
   2  -5  -5  289.17    2.60
   2  -4  -5  324.27    2.90
   3   1  -5   31.40    3.80
   7   8  -5    6.00    4.90
   8   9  -5   33.10    3.90
   9  10  -5   45.60    5.80
  10  11  -5   62.79    6.60
  13  13  -5  117.59    9.20
  15  14  -5   15.10   10.00
   5 -15  -6   11.90    2.50
   3  -9  -6  191.18    2.40
   3  -2  -6  212.08    3.80
   7   7  -6  633.64    6.40
   8   8  -6  196.48    5.80
   9   9  -6   66.99    6.00
  10  10  -6   26.80    7.10
  13  12  -6  117.39    8.50
  15  13  -6   52.89    7.70
  17  14  -6   -3.00   12.20
   8 -18  -7    1.70    4.10
   5 -13  -7   26.30    3.20
   4 -10  -7    9.70    2.70
   4  -1  -7   25.60    4.50
   5   2  -7  103.19    5.40
   6   4  -7   -6.00    5.40
   8   7  -7   24.60    5.90
   9   8  -7  437.36    7.50
  10   9  -7   13.80    7.50
  17  13  -7   25.60   11.80
  10 -19  -8    2.40    5.70
   7 -15  -8   71.69    4.40
   6 -13  -8   45.20    3.60
   5  -1  -8  154.28    4.90
   6   2  -8  212.68    6.00
   7   4  -8  213.58    6.30
  13  10  -8   21.40    7.00
  14  11  -8   29.60    9.10
  16  12  -8   12.70   11.60
   8 -15  -9    6.50    5.30
   7 -13  -9   10.10    4.90
   6 -10  -9  107.99    4.40
   6  -1  -9  511.15    6.20
   7   2  -9   12.10    6.10
   9   5  -9  212.58    5.60
  12   8  -9   11.90    6.00
  13   9  -9   64.79   10.00
  17  11  -9   12.20   10.20
  11 -17 -10    6.30    7.90
   7 -10 -10   21.30    4.70
   7  -2 -10   11.20    4.20
   7  -1 -10  114.79    6.00
   8   1 -10  354.56    5.70
   9   3 -10   73.09    5.40
  11   6 -10   90.29    8.40
  12   7 -10   24.10    8.50
  15   9 -10   36.30   12.40
  17  10 -10   63.59   13.90
  11 -15 -11   10.50    7.80
   9 -12 -11   15.80    7.40
   8  -9 -11   13.20    6.00
   8  -8 -11   -2.80    6.10
   8  -4 -11   31.20    4.80
   8  -3 -11    6.80    6.80
   9   0 -11   -0.50    5.00
  10   2 -11  101.79    5.90
  11   4 -11   18.70    8.50
  12   5 -11    7.30    9.50
  13   6 -11  177.78   10.40
  14   7 -11   21.20   10.80
  16   8 -11    7.20   10.00
  18   9 -11    1.10   14.30
  12 -14 -12   34.90    9.30
  10 -10 -12   56.29    7.90
  10  -1 -12   59.09    8.00
  11   1 -12   32.80    6.30
  12   3 -12   50.09    9.60
  13   4 -12   15.30   10.00
  14   5 -12    6.00   11.40
  15   6 -12   15.10   11.80
  17   7 -12  112.39   14.20
  12 -11 -13   28.60    9.80
  11  -8 -13   19.50    9.20
  11  -7 -13   12.90    8.70
  11  -6 -13   47.70    8.50
  11  -5 -13   -1.00    8.60
  11  -4 -13   90.39    9.20
  11  -3 -13   16.30    9.40
  12  -1 -13   94.59    7.30
  12   0 -13   63.69   10.10
  13   1 -13    5.10    7.40
  14   3 -13   23.80   11.20
  15   4 -13   17.60   12.10
  17   5 -13    5.80   10.10
  18   6 -13   30.60   16.50
  14 -10 -14    9.00   12.50
  13  -8 -14   42.50   11.40
  13  -7 -14    8.60   11.40
  13  -6 -14   45.60   10.80
  13  -5 -14   32.70   11.00
  13  -4 -14    7.90   11.20
  13  -3 -14   10.50   11.00
  14  -1 -14  106.69   12.60
  15   1 -14   45.30   12.70
  16   2 -14   47.60   13.70
  17   3 -14   13.00   14.90
  18   4 -14    3.90   15.20
  16  -7 -15   24.80   11.30
  16  -6 -15    7.90   11.20
  16  -5 -15   32.20   10.90
  16  -4 -15   12.00   10.90
  16  -3 -15   17.50   15.00
  16  -2 -15   45.50   15.00
  17  -1 -15    4.90   16.80
   3  -1  22    7.90   14.70
   2  -7  21   14.30   16.10
   2  -6  21    2.90   16.60
   2  -5  21   50.79   16.50
   2  -4  21   45.30   15.90
   2  -3  21   76.69   14.00
   2  -2  21   44.30   11.10
   3   1  21   23.50   14.10
   4   4  21    9.50    9.70
   2   0  20  161.08   13.10
   3   3  20   -3.90   12.10
   4   5  20    5.20   11.70
   6   8  20   10.80   11.80
   1  -9  19   31.40   14.00
   1  -8  19   21.20   13.50
   1  -3  19   15.70   11.70
   1  -2  19   52.49   12.20
   1  -1  19   11.10    8.40
   2   2  19  165.38   10.70
   3   4  19   34.40   10.20
   4   6  19    7.70   10.40
   1 -11  18   58.89   14.80
   1   0  18  -17.60   10.30
   1   1  18   -3.10    7.40
   2   3  18   14.90    8.90
   4   7  18   49.99    9.40
   1 -13  17   19.00   13.60
   0  -9  17    7.50   10.80
   0  -8  17    0.40   11.00
   0  -3  17    5.30    9.80
   0  -2  17   -2.70    9.00
   1   2  17   60.39    9.30
   3   6  17    3.20    7.70
   5   9  17  145.29    8.20
   8  12  17   27.80    9.00
   1 -14  16    8.70   12.60
   0 -11  16   25.50   11.40
   0 -10  16    0.90   10.10
   0   0  16  102.39    8.30
   1   3  16   17.50    7.90
   2   5  16  106.29    7.50
   3   7  16   59.09    7.70
   1 -15  15   28.70   12.30
   0 -12  15    2.00   11.90
  -1  -7  15   20.90    6.90
  -1  -6  15  340.07    9.10
  -1  -5  15   30.00    8.50
  -1  -4  15  187.68    6.50
   0   1  15  -16.00    7.70
   1   4  15  180.28    7.30
   2   6  15  113.99    7.00
   4   9  15    9.70    6.40
   8  13  15    9.00    6.40
   0 -13  14  248.58   11.60
  -1  -9  14  121.89    9.30
  -1  -8  14   25.90    8.90
  -1  -2  14   55.19    7.20
   0   2  14   80.99    7.10
   3   8  14   16.60    5.50
   2 -18  13   10.40   11.80
   1 -16  13   53.99   12.00
   0 -14  13    0.30    7.40
  -1 -10  13   77.59    8.80
  -1  -1  13   43.00    6.80
  -1   0  13   -1.80    5.00
   0   3  13    0.30    5.50
   1   5  13  648.44    6.60
   2   7  13   35.00    5.30
   5  11  13   39.60    4.40
   6  12  13   72.89    5.20
   2 -18  12   14.60   11.10
   0 -14  12  136.49    9.60
  -1 -11  12   85.89    8.50
  -1   0  12   14.40    5.60
   1 -17  11   31.80    7.70
  -1 -12  11   75.49    6.10
  -1   1  11  163.78    5.60
   0   4  11    4.30    4.30
   1   6  11  174.18    4.70
   1 -17  10   11.40    9.60
   0 -15  10   32.90    8.60
  -1 -12  10   40.90    7.80
  -2  -7  10   82.89    4.50
  -2  -6  10  118.69    4.50
  -2  -5  10    5.30    4.30
  -2  -4  10  122.79    4.50
   0   4  10  125.89    4.30
   1 -17   9   98.59    9.00
   0 -15   9    0.50    7.90
  -1 -12   9  129.19    6.80
  -2  -7   9   92.29    5.50
  -2  -6   9  198.38    6.00
  -2  -5   9  161.78    5.90
  -2  -4   9   94.49    5.70
  -2  -3   9  293.97    4.50
   2   8   9  209.08    3.30
   0 -15   8  199.78    7.30
  -2  -8   8   32.90    4.00
  -2  -7   8   97.09    5.30
  -2  -6   8   13.70    5.30
  -2  -5   8   94.29    5.40
  -2  -4   8  203.78    5.60
  -2  -3   8  119.79    4.00
   2   8   8   29.20    2.80
  -2  -7   7  333.27    5.10
  -2  -6   7  167.88    5.10
  -2  -5   7  668.53    5.90
  -2  -4   7  604.84    5.60
   2   8   7   13.70    2.20
   3 -20   6   92.69    8.50
   1 -17   6   70.89    6.80
  -2  -6   6   51.59    3.30
  -2  -5   6   39.70    3.20
  -2  -4   6  371.96    3.70
  12  17   6   15.30    4.20
   3 -20   5   98.09    7.00
  -1   1   5  141.19    3.10
   1   6   5  133.49    1.70
   4 -21   4   77.89    6.60
   2 -18   4   57.69    6.10
   0 -14   4    1.20    5.00
   1 -16   3   29.80    4.10
  -1 -10   3  154.28    3.30
   4  10   3  519.15    1.80
  11  16   3    7.60    5.10
  13  17   3   39.70    5.80
   0 -13   2  131.79    3.30
  -1  -9   2  537.95    3.30
  -1  -2   2 1187.18    3.30
  10  15   2  145.89    4.80
   6 -22   1    8.50    5.50
   0 -12   1   -1.70    2.30
   9  14   1  110.69    4.60
   2 -16   0  117.89    3.10
   6  11   0    7.60    3.50
  11  15   0  210.38    6.40
  13  16   0    1.90    6.70
  15  17   0   21.50    9.40
   2 -15  -1  154.08    2.70
   0  -2  -1    0.70    0.40
   1   2  -1  220.58    1.40
  12  15  -1   80.89    6.40
  14  16  -1    6.80    7.70
   3 -16  -2  139.09    2.20
  11  14  -2  184.88    6.70
  15  16  -2   23.80    9.20
   2   2  -3  208.68    2.70
   6   9  -3  188.08    4.20
   7  10  -3  324.07    5.00
   8  11  -3  232.68    5.20
   9  12  -3   41.50    5.00
  12  14  -3  130.59    7.30
  14  15  -3   41.40    8.80
  16  16  -3   18.50   11.30
   2   0  -4  575.94    3.10
   3   3  -4  104.59    2.80
   4   5  -4   20.70    2.90
   6   8  -4   13.90    4.10
  10  12  -4    9.40    6.00
  13  14  -4  120.89    8.40
  15  15  -4   13.60    9.20
   2  -8  -5  190.68    2.00
   2  -3  -5  598.04    3.50
   6   7  -5   54.49    4.50
  11  12  -5   25.30    7.10
  17  15  -5   14.20   12.40
   4 -13  -6   72.39    2.50
   4   2  -6   70.69    4.50
   5   4  -6   42.00    3.50
   6   6  -6    8.10    4.80
  11  11  -6   73.79    5.80
  12  12  -6   63.39    7.40
  14  13  -6   56.29   10.00
  16  14  -6    5.50   11.50
   7 -17  -7  134.49    4.10
   7   6  -7   55.99    5.50
  11  10  -7   10.60    5.50
  12  11  -7  125.79    8.60
  14  12  -7   12.40    7.40
  16  13  -7    5.50   10.80
   9 -18  -8   26.70    5.00
   5 -11  -8    2.00    3.70
   5   0  -8   -9.90    5.20
   8   6  -8   36.50    6.60
   9   7  -8  339.17    6.10
  10   8  -8    9.60    5.40
  11   9  -8   -1.30    7.60
  12  10  -8    9.10    8.90
   6 -11  -9    6.90    3.90
   6   0  -9   33.80    5.60
   8   4  -9   29.30    4.80
  10   7  -9   71.99    7.80
  11   8  -9   82.89    8.30
  14  10  -9   71.19   10.10
  16  11  -9   31.90    9.70
  10 -16 -10    2.00    6.30
   8 -13 -10   52.69    5.30
   7   0 -10    5.80    5.90
   8   2 -10   12.50    6.40
   9   4 -10   38.00    7.40
  10   5 -10   38.50    5.60
  13   8 -10   86.59    7.50
  14   9 -10   10.60   10.90
  16  10 -10    3.20   11.80
  10 -14 -11   -4.80    6.90
   8 -10 -11   20.10    5.90
   8  -2 -11   57.39    5.20
   8  -1 -11  183.58    7.30
   9   1 -11   80.79    5.50
  10   3 -11   74.19    6.00
  12   6 -11    0.40    9.10
  15   8 -11   58.29    9.70
  16   9 -11   10.50   12.80
  17   9 -11    0.00   11.00
  11 -13 -12   46.60    8.10
  10 -11 -12   16.20    7.80
   9  -8 -12    8.00    7.40
   9  -7 -12   -4.30    6.80
   9  -6 -12   30.80    5.30
   9  -5 -12   28.80    5.50
   9  -4 -12   29.00    5.60
   9  -3 -12   43.90    7.70
  10   0 -12  478.25    7.10
  11   2 -12   -0.40    6.20
  12   4 -12  129.49    9.40
  13   5 -12   56.19   10.20
  14   6 -12   14.00   10.70
  16   7 -12    6.90   10.30
  17   8 -12    3.90   13.90
  18   8 -12   17.80   11.70
  13 -13 -13    8.80    9.60
  12 -12 -13   26.00    9.80
  11 -10 -13   -1.70    8.20
  11  -9 -13    3.30    8.40
  11  -2 -13   39.50    6.80
  11  -1 -13   22.50    8.90
  12   1 -13   80.89   10.20
  13   2 -13   94.69    8.00
  14   4 -13   34.70   10.90
  16   5 -13   -2.60    9.70
  17   6 -13    6.80   15.80
  14 -11 -14    4.40   11.30
  13 -10 -14    7.20   10.40
  13  -9 -14    3.00   10.40
  12  -6 -14   76.79    9.40
  12  -5 -14   31.50    9.30
  13  -2 -14  114.99    8.50
  13  -1 -14   22.40   11.10
  14   0 -14  211.58    9.30
  14   1 -14  112.69   12.00
  15   2 -14   15.70   12.30
  16   3 -14   17.60   13.50
  17   4 -14   17.20   15.40
  15  -8 -15   20.30   13.70
  15  -7 -15   20.40   13.20
  15  -6 -15   12.90   10.40
  15  -5 -15   19.40   10.40
  15  -4 -15    5.60   10.00
  15  -3 -15    5.40   13.20
  15  -2 -15   -5.00   14.00
  16  -1 -15   26.50   14.00
  16   0 -15  166.28   14.20
  17   0 -15    5.40   12.50
  17   1 -15   -5.90   16.70
   3  -1  21   24.30   13.50
   3   0  21   -2.20   12.80
   4   3  21   25.20   12.70
   5   5  21   12.80   11.90
   2  -9  20   18.00   14.40
   2  -8  20   -0.50   14.90
   2  -3  20    4.50   12.40
   2  -2  20   -0.50   13.40
   2  -1  20    3.60    9.40
   3   2  20   74.89   12.10
   4   4  20   39.00   10.90
   5   6  20   55.09   12.40
   2 -11  19   30.90   16.60
   1  -7  19   23.20    9.60
   1  -6  19   69.89    9.60
   1  -5  19   13.50    8.60
   1  -4  19   84.19    8.90
   2   1  19   20.50   10.50
   5   7  19   50.59   10.60
   2 -13  18   13.70   16.10
   1 -10  18   35.20   10.30
   1  -9  18   52.09   13.00
   1  -1  18    7.50   10.30
   3   5  18   43.00    7.30
   5   8  18   32.80    9.60
   6   9  18   19.30   10.00
   2 -14  17   47.50   14.00
   1 -12  17   29.10   10.70
   1 -11  17    7.00   12.50
   0  -7  17   -4.30    8.00
   0  -6  17    7.90    7.40
   0  -5  17    2.00    7.20
   0  -4  17   -3.90    7.00
   1   1  17   32.30    9.50
   2   4  17   98.89    6.70
   6  10  17   28.50    7.70
   7  11  17   11.60    8.10
   2 -15  16    0.40   13.30
   1 -13  16   31.00   12.50
   0  -9  16   19.90   10.70
   0  -8  16  164.18    9.80
   0  -2  16  310.77    9.20
   0  -1  16   10.30    6.10
   1   2  16    6.90    7.60
   4   8  16   36.20    7.50
   2 -16  15    1.90   14.70
   1 -14  15   26.40   11.50
   0 -11  15    4.30   10.20
   0   0  15   -6.30    7.80
   5  10  15   99.39    6.40
   6  11  15   46.90    6.30
   7  12  15   37.70    7.00
   2 -17  14    4.90   10.10
   1 -15  14   55.89    9.00
   0 -12  14  196.98   11.20
  -1  -7  14  158.58    6.80
  -1  -6  14  159.28    8.20
  -1  -5  14  287.47    8.90
  -1  -4  14  133.09    5.90
  -1  -3  14   28.10    5.40
   1   4  14  126.99    6.90
   2   6  14   58.29    5.90
   9  14  14    6.80    5.40
   2 -17  13   16.40   11.30
   1 -15  13   53.49   10.30
   0 -13  13  -10.40    9.10
  -1  -9  13   20.30    7.90
  -1  -8  13   -5.90    8.30
  -1  -2  13  111.89    7.30
   0   2  13    1.60    5.80
  10  15  13    4.10    4.50
   1 -16  12   67.09   10.20
  -1 -10  12   32.80    8.00
  -1  -1  12   28.50    6.20
   0   3  12  134.99    5.60
   2   7  12  127.79    4.80
   4  10  12   48.80    4.20
   5  11  12  107.99    4.60
   7  13  12   48.70    4.40
   2 -18  11   49.99   11.00
   1 -16  11   38.50    9.70
   0 -14  11   -3.50    8.70
  -1 -11  11   30.40    5.60
  -1   0  11   -1.80    5.50
   3   9  11   32.50    3.60
   2 -18  10   11.40    9.40
   0 -14  10  159.88    7.90
  -1 -11  10   64.99    7.50
  -1   1  10   16.60    3.40
   1   6  10   76.69    4.20
  -1   1   9   19.60    4.70
   0   4   9   -3.20    3.80
   1   6   9   72.79    3.80
   3 -20   8   12.10    9.70
  -1 -12   8  254.97    5.40
  -1   1   8  164.08    4.50
   0   4   8 1242.58    5.20
   4 -21   7   24.00   10.00
   3 -20   7    4.30    8.30
  -1 -12   7  164.18    4.40
  -1   1   7  449.46    4.40
   0   4   7   -0.70    2.90
   4 -21   6   10.00    9.50
  -1   1   6   67.39    3.40
   0   4   6  162.48    2.60
   4 -21   5   16.80    7.30
   2 -18   5   72.39    7.10
   0 -14   5   -7.00    5.50
  12  17   5   43.90    4.70
   1 -16   4   38.50    5.90
  -1   0   4   -3.30    3.00
   9  15   4   57.69    3.50
   3 -19   3   98.39    5.80
   8  14   3   14.20    3.40
   4 -20   2   16.70    5.30
   2 -17   2   50.19    4.40
   1 -15   2  104.29    4.30
  -1  -8   2   31.20    2.50
  12  16   1    8.80    5.60
  14  17   1   37.60    8.00
   4 -19   0    6.80    3.90
   5  10   0  402.96    3.60
   7  12   0  150.58    3.60
   8  13   0   13.10    4.30
   4   8  -1  174.48    2.70
  10  14  -1   24.30    5.30
   5 -19  -2   23.50    2.90
   1 -11  -2   85.69    1.20
   6  10  -2  215.08    4.70
   7  11  -2  395.46    4.80
   8  12  -2  124.49    5.20
   5   8  -3  227.98    3.90
  10  13  -3   26.10    5.70
   5   7  -4  301.67    4.40
  11  13  -4   56.89    7.10
   4   4  -5   64.69    3.20
   5   6  -5 1311.87    6.40
  12  13  -5   85.89    8.60
  14  14  -5   15.90    8.80
  16  15  -5   29.00   11.40
   3 -10  -6   61.59    2.40
   3  -1  -6   44.00    2.80
  15  14  -6   59.69   10.10
   4 -11  -7    2.50    2.90
   4   0  -7  478.75    4.30
   5   3  -7   32.50    5.30
   6   5  -7   13.10    5.30
  13  12  -7  105.69    9.50
  15  13  -7   54.49   11.40
  17  14  -7    3.40   13.10
   8 -17  -8   36.70    4.50
   4  -6  -8  143.49    3.90
   4  -5  -8    9.30    3.80
   4  -4  -8  285.77    4.40
   6   3  -8   15.10    4.00
   7   5  -8   72.19    5.80
  13  11  -8   48.80    9.50
  15  12  -8   81.29    8.70
  17  13  -8    6.00   13.70
  10 -18  -9    2.40    6.50
   9 -17  -9   23.30    5.80
   5  -7  -9  868.11    5.80
   5  -6  -9  217.28    4.80
   5  -5  -9  144.19    4.40
   5  -4  -9  137.19    4.90
   5  -3  -9  133.29    4.80
   6   1  -9  554.74    6.80
   7   3  -9   50.29    6.20
   8   5  -9    3.50    6.60
   9   6  -9  164.78    5.70
  12   9  -9   40.40    6.70
  13  10  -9   48.20    9.90
  15  11  -9    6.60    8.60
  17  12  -9   38.20   13.40
   9 -15 -10   15.00    5.60
   7 -11 -10  123.09    5.30
   6  -7 -10   15.60    5.20
   6  -6 -10   13.10    5.10
   6  -5 -10   10.20    5.30
   6  -4 -10   23.50    5.50
   6  -3 -10  146.69    5.50
   8   3 -10  646.34    8.00
  10   6 -10   33.00    7.80
  11   7 -10  199.98    9.00
  12   8 -10   76.69    9.50
  15  10 -10   32.80   12.60
  17  11 -10   68.29   15.10
  11 -16 -11   16.20    8.00
   9 -13 -11   75.99    6.50
   8 -11 -11   87.09    7.00
   7  -6 -11   61.99    5.60
   7  -5 -11   80.99    5.90
   8   0 -11  145.89    7.20
   9   2 -11    6.40    5.50
  10   4 -11  173.38    8.60
  11   5 -11   11.20    6.30
  13   7 -11   87.29    8.10
  14   8 -11   63.79   12.00
  17  10 -11   -0.80   13.70
  12 -15 -12    7.80    8.90
  11 -14 -12    8.80    8.70
  10 -12 -12   98.19    7.80
   9 -10 -12   18.00    6.80
   9  -9 -12   18.00    6.90
   9  -2 -12   20.30    5.50
   9  -1 -12   19.80    7.70
  10   1 -12   61.49    5.90
  11   3 -12   73.39    8.50
  15   7 -12   49.40    9.80
  16   8 -12   11.80   13.70
  12 -13 -13   35.10   10.50
  11 -11 -13   30.60    9.30
  10  -8 -13   26.50    7.90
  10  -7 -13   39.20    8.20
  10  -6 -13   45.10    7.70
  10  -5 -13   45.80    8.20
  10  -4 -13   76.59    9.10
  10  -3 -13  111.79    8.80
  11   0 -13   -2.00    9.10
  12   2 -13   40.20    9.70
  13   3 -13   -1.60    7.90
  15   5 -13   45.80    8.90
  16   6 -13   49.70   13.30
  17   7 -13    9.20   15.80
  13 -11 -14   43.50   11.50
  12  -9 -14   22.90    9.50
  12  -8 -14   42.40   10.60
  12  -7 -14    6.20    7.60
  12  -4 -14   51.99    7.80
  12  -3 -14  136.19   10.10
  12  -2 -14   17.00   10.40
  13   0 -14   -7.70   10.10
  14   2 -14   37.60   11.70
  15   3 -14   39.30   13.00
  16   4 -14   14.70   14.00
  17   5 -14    6.50   16.10
  14  -8 -15   36.50   12.50
  14  -7 -15   28.80   13.00
  14  -6 -15    2.10   12.30
  14  -5 -15  113.29   11.70
  14  -4 -15   25.50   11.60
  14  -3 -15   99.39   13.00
  14  -2 -15    1.10   11.90
  15  -1 -15    2.70   10.00
  15   0 -15    2.70   13.80
  16   1 -15   20.40   15.20
  17   2 -15   32.20   14.70
   3  -6  21   -1.00   15.10
   3  -5  21   29.60   15.00
   3  -4  21   35.90   14.60
   3  -3  21  135.69   15.20
   3  -2  21   -2.20   13.50
   4   2  21    5.60   12.90
   5   4  21   22.90   13.30
   2  -7  20   -1.60   10.70
   2  -6  20   16.20   10.40
   2  -5  20   42.60   10.50
   2  -4  20   42.30   10.40
   3   1  20   12.10   12.00
   6   7  20   -0.20   11.90
   2 -10  19   17.20   14.40
   2  -9  19   21.20   13.10
   2  -1  19   17.10   12.50
   2   0  19   87.29    8.90
   3   3  19   17.20    7.50
   4   5  19   24.80    9.70
   6   8  19   24.70   10.60
   7   9  19   61.29   11.40
   2 -12  18   22.20   14.40
   1  -8  18    2.70    8.70
   1  -7  18  161.68   12.20
   1  -6  18   15.10   11.40
   1  -5  18   98.09   11.20
   1  -4  18   -1.70   11.10
   1  -3  18   62.39   10.20
   1  -2  18   14.90    7.60
   2   2  18    4.20    7.00
   3   4  18   56.79    9.80
   4   6  18   35.40    9.60
   7  10  18    7.40    9.30
   2 -13  17   46.20   14.90
   1 -10  17   72.19   12.40
   1   0  17   -1.40    8.90
   2   3  17  155.08    9.20
   3   5  17   61.29    9.20
   4   7  17   36.10    8.40
   2 -14  16    4.50   12.80
   1 -12  16   30.50   12.00
   0  -7  16   45.40    7.30
   0  -6  16   26.90    9.20
   0  -5  16  187.08    9.90
   0  -4  16  276.17    9.50
   0  -3  16   42.80    6.80
   1   1  16   26.30    7.90
   2   4  16  120.79    8.10
   3   6  16   76.19    7.80
   5   9  16   28.20    7.40
   9  13  16   40.10    7.90
   2 -15  15   33.20   12.60
   1 -13  15   26.20   12.60
   0 -10  15    1.80    7.60
   0  -9  15  -10.20   10.40
   0  -1  15    1.40    7.80
   1   3  15   43.40    5.50
   2   5  15   86.79    7.20
   3   7  15   65.19    6.40
   2 -16  14    9.90   13.10
   1 -14  14   50.19   11.00
   0 -11  14   37.90    9.60
   0   1  14  408.86    6.00
   4   9  14   13.20    5.60
   8  13  14    1.70    5.50
   3 -18  13   14.20   12.30
   0 -12  13    5.90    9.20
  -1  -7  13  203.68    6.00
  -1  -6  13    8.30    7.20
  -1  -5  13  652.53    8.50
  -1  -4  13   74.39    7.10
  -1  -3  13  116.49    5.50
   3   8  13  122.79    5.30
   2 -17  12   10.90   11.50
   1 -15  12   73.29    9.90
   0 -13  12   60.79    7.00
  -1  -9  12   -1.30    5.60
  -1  -8  12   36.70    7.40
  -1  -2  12  143.19    6.60
   1   5  12  242.78    5.30
   6  12  12   11.70    4.30
   3 -19  11    8.90   12.10
   0 -13  11    9.40    8.30
  -1 -10  11   51.29    5.50
  -1  -9  11    8.20    7.30
  -1  -1  11  162.48    5.70
   0   3  11    0.10    4.80
   4  10  11  122.89    4.40
   8  14  11   31.10    3.40
  11  16  11   13.60    3.30
   1 -16  10   80.29    9.60
  -1 -10  10   47.90    7.00
  -1   0  10   -5.50    5.20
   3   9  10  205.18    3.50
   2 -18   9   17.10    9.50
   1 -16   9   66.19    8.70
   0 -14   9    2.30    7.50
  -1 -11   9  207.88    5.50
   9  15   9   12.30    2.10
   0 -14   8  191.58    7.20
  -1 -11   8  223.38    6.30
   1   6   8  192.68    3.00
   2 -18   7  124.09    7.90
  -1 -11   7  260.37    5.70
   1   6   7  278.37    2.70
   2 -18   6   20.80    7.00
   1 -16   6   69.69    7.20
  -1 -11   6  245.38    5.00
   1   6   6  176.18    2.00
  10  16   6    9.20    2.80
   1 -16   5   51.79    5.60
   3 -19   4   75.99    6.70
   0 -13   3    1.20    3.70
  -1  -1   3  229.88    2.30
   5 -21   2   22.00    6.00
   6  12   2   82.59    2.60
   7  13   2   80.99    3.40
  13  17   2    2.00    6.50
   3 -18   1   61.89    4.20
  10  15   1   18.70    5.10
   0 -10   0   66.79    1.80
   0  -8  -1    2.50    1.20
  13  16  -1   73.89    7.20
  15  17  -1   14.00    9.40
   9  13  -2   37.80    4.80
  12  15  -2   29.60    6.90
  14  16  -2    8.00    8.10
   1  -1  -3  248.98    2.60
  13  15  -3   28.50    7.80
  15  16  -3   15.10    9.60
   2   1  -4  200.88    3.50
  12  14  -4    0.00    6.90
  14  15  -4   54.99    9.50
  16  16  -4   28.10   12.10
   2  -2  -5   70.99    2.10
   3   2  -5  551.14    3.80
   7   9  -5  211.18    5.30
   8  10  -5   69.59    5.60
   9  11  -5   89.39    6.50
  13  14  -5   27.10    9.60
  15  15  -5    7.40    9.50
   6 -17  -6   10.80    2.50
   3   0  -6   -0.90    4.00
   4   3  -6  786.02    5.70
   5   5  -6   77.49    4.90
   7   8  -6   14.20    5.40
   8   9  -6   76.19    5.40
   9  10  -6  148.49    5.30
  10  11  -6   24.30    6.90
  13  13  -6   70.29    8.90
   4   1  -7   18.10    4.70
   8   8  -7   55.69    6.30
   9   9  -7   41.00    4.90
  10  10  -7   97.49    7.30
  11  11  -7   21.20    8.00
  14  13  -7   58.79   10.80
  16  14  -7   13.20   11.20
   6 -14  -8   99.09    3.80
   5 -12  -8   45.00    3.90
   4  -8  -8    7.40    4.00
   4  -7  -8   65.39    3.80
   4  -3  -8   26.40    4.20
   5   1  -8  145.99    4.10
   8   7  -8   31.40    6.40
   9   8  -8   10.70    7.10
  10   9  -8    6.60    7.80
  11  10  -8  128.69    8.50
  14  12  -8   57.79   10.30
  16  13  -8   33.50   12.70
   7 -14  -9   12.30    4.10
   6 -12  -9   86.79    4.60
   5  -8  -9  102.99    4.40
   5  -2  -9   78.59    5.10
  10   8  -9   13.90    7.20
  11   9  -9   28.60    8.10
  14  11  -9    6.50   10.90
  16  12  -9   47.00   12.40
   8 -14 -10   48.90    5.80
   7 -12 -10   34.70    5.40
   6  -8 -10   59.99    5.10
   6  -2 -10   73.99    5.70
   7   1 -10  106.89    4.90
   9   5 -10  -13.10    6.90
  13   9 -10    3.80    7.40
  14  10 -10   71.99   11.70
  16  11 -10    1.00   13.80
  10 -15 -11   10.60    7.00
   7  -8 -11  107.49    5.90
   7  -7 -11   42.60    5.70
   7  -4 -11   18.90    4.40
   7  -3 -11   75.69    6.40
   7  -2 -11  239.78    6.60
   8   1 -11  189.38    7.40
   9   3 -11  175.38    8.30
  11   6 -11   -4.00    9.10
  12   7 -11    6.90    9.70
  13   8 -11  141.19   11.20
  15   9 -11   51.19    9.60
  16  10 -11   19.80   13.70
  10 -13 -12   29.30    8.10
   9 -11 -12   57.39    7.90
   8  -7 -12   61.59    6.60
   8  -6 -12  164.58    7.30
   8  -5 -12   46.80    7.10
   8  -4 -12  213.48    7.70
   9   0 -12    6.60    7.20
  10   2 -12   78.29    6.00
  11   4 -12  116.29    9.10
  12   5 -12  119.69    7.30
  13   6 -12   15.50    8.00
  14   7 -12   17.30   11.10
  15   8 -12   66.79   13.50
  17   9 -12   41.20   15.60
  11 -12 -13   30.00    8.60
  10  -9 -13   29.90    8.30
  10  -2 -13   43.00    6.00
  10  -1 -13   11.70    8.40
  11   1 -13    9.50    9.10
  12   3 -13   39.50   10.40
  13   4 -13   25.80    7.80
  14   5 -13   31.60    8.70
  15   6 -13   23.40   11.90
  16   7 -13   -3.80   14.80
  13 -12 -14    1.40   11.20
  12 -10 -14   16.10   10.50
  11  -7 -14   76.49    9.10
  11  -6 -14   13.00    9.30
  11  -5 -14  204.18    9.90
  11  -4 -14   39.20    9.60
  12  -1 -14  123.69    8.10
  12   0 -14   34.40   10.50
  13   1 -14   21.80    8.40
  13   2 -14   99.89   10.70
  14   3 -14   10.10   12.10
  15   4 -14    5.70   13.10
  16   5 -14   41.60   14.30
  17   6 -14   20.10   15.60
  14 -10 -15   20.70   13.00
  14  -9 -15   40.50   11.50
  13  -7 -15   16.00   11.90
  13  -6 -15   30.40   12.10
  13  -5 -15    3.20   11.80
  13  -4 -15   39.50   12.20
  13  -3 -15   38.30   11.40
  14  -1 -15   -0.80   12.30
  14   0 -15   45.20   11.80
  15   1 -15   15.20   14.30
  16   2 -15   47.80   13.90
  17   3 -15   15.40   15.20
  16  -4 -16   21.60   11.80
  16  -3 -16   34.30   14.30
  16  -2 -16    8.80   16.00
   4   0  21   11.60   14.30
   4   1  21   -3.80   10.60
   5   3  21   24.00   13.80
   3  -9  20   19.70   16.30
   3  -1  20   -4.10   13.10
   3   0  20    1.60    9.20
   4   3  20    7.00    8.90
   5   5  20   19.90    8.70
   2  -8  19   13.80   10.30
   2  -7  19    7.70   13.20
   2  -6  19   30.50   12.60
   2  -5  19   26.70   12.40
   2  -4  19   92.59   12.00
   2  -3  19   97.39   12.60
   2  -2  19  145.39    9.30
   3   2  19   28.50    9.90
   4   4  19   39.30   10.90
   5   6  19  130.49   11.10
   3 -13  18   34.80   15.00
   2 -11  18    1.50   10.60
   2 -10  18   30.70   14.30
   2   0  18    4.90   10.70
   2   1  18   50.89    7.50
   3   3  18   55.29    9.10
   5   7  18   29.70    9.40
   2 -12  17   28.70   14.70
   1  -9  17   36.30    8.80
   1  -8  17    7.60   11.40
   1  -7  17    9.30   10.80
   1  -3  17   73.59   10.00
   1  -2  17   56.29    9.80
   1  -1  17   38.50    7.00
   2   2  17   57.39    9.30
   5   8  17   47.90    8.10
   1 -11  16  107.59    9.30
   1 -10  16  110.79   11.60
   1   0  16    4.00    8.10
   6  10  16    0.30    7.00
   7  11  16   42.90    7.20
   8  12  16   50.49    7.10
   1 -12  15   42.30   12.00
   0  -8  15   -5.10    6.90
   0  -7  15    5.30    9.40
   0  -6  15    0.00    8.60
   0  -5  15   -1.90    8.60
   0  -4  15   -1.50    8.40
   0  -3  15    2.00    8.00
   0  -2  15   -5.40    5.70
   1   2  15    6.70    7.20
   4   8  15   -4.10    6.70
   3 -17  14   -2.20   14.40
   2 -15  14    9.70   11.20
   1 -13  14   31.70   11.40
   0 -10  14  145.19    7.40
   0  -9  14   98.29    9.20
   0  -1  14  451.95    8.10
   0   0  14  219.38    5.70
   1   3  14   27.30    7.00
   3   7  14  295.67    6.40
   5  10  14   15.50    5.30
   6  11  14   37.00    6.10
   7  12  14   37.80    6.00
   2 -16  13   51.09   12.20
   1 -14  13   44.90    9.60
   0 -11  13    4.80    8.80
   0   1  13   -1.00    4.70
   1   4  13   62.89    4.30
   2   6  13  103.89    5.60
   4   9  13  132.79    5.90
   3 -18  12   15.80   11.30
   0 -12  12  217.58    6.90
  -1  -7  12   31.50    5.20
  -1  -6  12  137.99    5.60
  -1  -5  12  268.47    7.10
  -1  -4  12  127.69    5.20
  -1  -3  12   86.99    5.00
   0   2  12  312.87    4.70
   3   8  12  239.28    5.40
   2 -17  11    0.70   10.40
   1 -15  11   28.40    9.30
   0 -12  11   -6.10    7.70
  -1  -8  11   54.59    7.10
  -1  -7  11   42.50    6.80
  -1  -3  11  272.37    6.60
  -1  -2  11   40.10    5.80
   1   5  11   76.19    4.70
   2   7  11  274.37    4.60
   5  11  11   82.39    4.00
   7  13  11   69.69    3.80
   4 -20  10   30.10   11.20
   3 -19  10    9.50    9.90
   2 -17  10   10.80    9.00
   0 -13  10  251.07    8.50
  -1  -9  10   55.79    6.90
  -1  -1  10   23.90    5.30
   0   3  10  206.78    4.80
   0 -13   9   -1.20    6.80
  -1 -10   9   27.00    4.70
  -1   0   9    0.80    3.40
   3   9   9  160.48    2.90
   1 -16   8   39.30    7.20
  -1 -10   8  546.25    6.70
  -1   0   8   -1.30    4.50
   3 -19   7   37.20    8.80
  -1 -10   7  163.28    5.50
  -1   0   7    3.70    4.10
   3 -19   6   18.00    8.00
  -1 -10   6  334.37    5.10
  -1   0   6    4.60    3.60
   3 -19   5   23.00    6.70
  -1   0   5   -3.40    2.20
   3   9   5  158.38    1.10
   0 -13   4  716.83    5.30
   0   3   4  188.28    2.10
  12  17   4   48.50    5.10
   4 -20   3    0.20    6.50
   2 -17   3   45.40    5.20
   1 -15   3   67.49    4.60
   9  15   3  119.79    4.00
   0 -12   2  288.07    3.60
   0   2   2   75.39    1.10
   5  11   2   98.49    2.10
  11  16   2  129.69    5.40
   2 -16   1   74.69    4.00
   1 -14   1  130.79    3.40
   0 -11   1   -3.50    2.70
   3   8   1  917.91    2.60
   5 -20   0   16.50    5.00
   4   9   0  162.68    2.60
   9  14   0    4.60    4.30
  12  16   0    9.70    6.20
  14  17   0    6.30    7.60
  11  15  -1    0.60    5.60
   1   1  -2  160.18    1.80
   2   4  -2  290.87    2.70
   3   6  -2  378.26    3.10
   5   9  -2  287.57    3.60
  10  14  -2    9.90    6.10
   3   5  -3   10.50    2.30
  11  14  -3   30.80    6.20
   3   4  -4   93.39    3.70
   4   6  -4   96.39    4.20
   7  10  -4  363.56    5.30
   8  11  -4  236.28    5.60
   9  12  -4   90.69    5.70
   4 -15  -5   16.80    1.40
   2  -9  -5  120.29    1.70
   2  -1  -5 1873.21    5.20
   6   8  -5   72.49    4.80
  10  12  -5   24.30    6.30
  11  13  -5   62.79    6.70
   6   7  -6    3.20    4.90
  11  12  -6   22.70    7.10
  14  14  -6   58.79   10.10
  16  15  -6   -3.30   12.00
   5 -14  -7   75.09    3.00
   3  -7  -7  327.67    3.30
   3  -6  -7    7.40    2.90
   3  -5  -7  113.39    2.60
   3  -4  -7  357.66    3.90
   3  -3  -7   19.90    3.90
   5   4  -7   83.39    5.40
   7   7  -7  212.28    4.60
  12  12  -7  131.09    8.90
   7 -16  -8   34.20    4.00
   4  -2  -8  280.97    3.90
   5   2  -8   56.19    5.60
   6   4  -8  200.48    4.60
   7   6  -8  740.93    7.30
  12  11  -8   26.10    8.40
  15  13  -8   60.29   11.90
   8 -16  -9   42.70    4.90
   5  -9  -9  137.09    4.30
   5  -1  -9   82.69    5.20
   6   2  -9  151.88    4.50
   7   4  -9   92.79    4.80
   8   6  -9   85.29    7.10
   9   7  -9  118.09    5.70
  12  10  -9   48.00    9.00
  13  11  -9   40.20    9.20
  15  12  -9   51.79   12.90
  10 -17 -10   23.40    7.00
   9 -16 -10    9.70    6.40
   6  -9 -10   27.90    4.60
   6  -1 -10  171.58    5.90
   7   2 -10    7.90    4.70
   8   4 -10   44.40    5.10
  10   7 -10   -0.10    8.10
  11   8 -10   20.60    8.90
  12   9 -10   60.99   10.00
  15  11 -10   11.20   12.50
  17  12 -10   15.00   15.00
   9 -14 -11   31.80    6.40
   8 -12 -11   53.59    5.90
   7  -9 -11   29.70    5.60
   7  -1 -11    7.10    6.60
   8   2 -11   59.39    7.40
   9   4 -11   84.39    8.00
  10   5 -11  151.88    6.10
  14   9 -11   14.10    8.60
  15  10 -11    5.30   12.10
  17  11 -11   42.20   15.80
  11 -15 -12   60.69    8.70
   8  -8 -12   19.30    6.80
   8  -3 -12    2.70    5.20
   8  -2 -12  136.39    7.70
   9   1 -12   11.10    5.40
  10   3 -12  155.78    6.80
  11   5 -12  107.09    9.30
  12   6 -12   44.40   10.00
  13   7 -12   80.89   10.90
  14   8 -12    7.20   12.00
  16   9 -12   48.50   13.80
  12 -14 -13    5.90   10.00
  10 -10 -13   10.90    7.60
   9  -7 -13   59.89    7.40
   9  -6 -13   65.29    8.00
   9  -5 -13  113.49    8.20
   9  -4 -13   76.79    8.20
   9  -3 -13   84.89    7.70
  10   0 -13   25.00    8.50
  11   2 -13   55.09    6.90
  12   4 -13   78.79   10.40
  13   5 -13  103.09   11.70
  14   6 -13   20.30   12.00
  15   7 -13   46.20   13.40
  17   8 -13   12.50   15.60
  12 -11 -14    4.90   10.40
  11  -9 -14   60.19    9.00
  11  -8 -14    7.20    9.10
  11  -3 -14  127.99    7.50
  11  -2 -14   34.40    9.40
  11  -1 -14    9.50    9.00
  12   1 -14  126.99   10.80
  13   3 -14   -3.90   10.80
  14   4 -14    4.10   12.20
  15   5 -14   12.70   13.30
  16   6 -14    9.90   14.00
  13  -9 -15  109.09   11.90
  13  -8 -15   32.50    8.90
  13  -2 -15   10.30    9.00
  13  -1 -15   30.90   12.40
  14   1 -15    2.50   12.70
  15   2 -15    4.40   10.40
  16   3 -15    9.10   11.10
  17   4 -15   11.90   11.60
  15  -6 -16   54.99   11.60
  15  -5 -16   14.60   11.40
  15  -4 -16   10.60   10.60
  15  -3 -16   19.30   13.50
  15  -2 -16   27.60   14.80
  16  -1 -16   17.80   12.50
  16   0 -16    8.60   17.40
   4  -3  21   18.80   14.20
   4  -2  21  -10.10   14.70
   4  -1  21   -1.70   13.30
   5   2  21   53.09   14.60
   6   4  21    6.90   12.80
   3  -8  20  108.39   11.70
   3  -7  20   24.30   13.40
   3  -6  20   50.09   14.00
   3  -5  20   51.19   14.20
   3  -4  20   34.30   14.50
   3  -3  20    5.50   12.60
   3  -2  20   72.59    9.80
   4   1  20   31.50   11.60
   4   2  20   88.69    9.60
   5   4  20   26.50   12.20
   6   6  20   -0.30   11.10
   7   7  20    7.40   11.40
   3 -11  19   25.00   12.50
   3 -10  19   46.50   15.90
   3   0  19   -3.20   10.90
   3   1  19   16.10    8.40
   4   3  19   36.80   10.20
   6   7  19   92.49   11.00
   3 -12  18    9.40   16.50
   2  -9  18   43.30   11.70
   2  -8  18    6.10   12.20
   2  -2  18    6.10   10.10
   2  -1  18   62.39    9.80
   4   5  18  126.59    9.40
   6   8  18   -2.60    9.40
   3 -14  17   22.20   11.70
   2 -11  17   18.10   13.60
   1  -6  17   35.00    7.60
   1  -5  17   60.39    7.40
   1  -4  17   47.60    7.20
   2   1  17  136.59    9.60
   3   4  17   61.69    8.80
   4   6  17    3.90    8.60
   6   9  17   61.39    8.10
   7  10  17    7.40    8.00
   8  11  17   12.20    8.80
   3 -15  16   60.29   13.60
   2 -13  16   13.20   10.00
   2 -12  16   19.60   12.20
   1  -9  16   43.20   10.40
   1  -8  16   10.30    9.70
   1  -1  16   18.90    8.50
   2   3  16   22.20    5.60
   3   5  16   61.19    8.00
   4   7  16   83.79    7.20
   3 -16  15   30.80   11.10
   2 -14  15   51.29    9.40
   1 -11  15   64.79   10.70
   1   1  15   22.50    7.70
   2   4  15  145.19    6.80
   3   6  15   74.09    7.00
   5   9  15   49.70    6.70
   1 -12  14   36.60   10.60
   0  -8  14   73.39    6.50
   0  -7  14    9.20    8.60
   0  -6  14   21.70    7.90
   0  -4  14  118.19    7.60
   0  -3  14  887.01    9.30
   0  -2  14   71.79    7.00
   1   2  14   52.49    7.10
   2   5  14   21.00    4.70
   3 -17  13   23.20   12.70
   2 -15  13   18.00   10.30
   1 -13  13   51.29   10.10
   0 -10  13    6.90    6.10
   0  -9  13   -0.10    8.30
   0   0  13    2.60    4.90
   1   3  13  148.69    5.60
   9  14  13   13.10    4.90
   2 -16  12   14.60   11.10
   1 -14  12   11.60    6.90
   0 -11  12  270.07    6.60
   0   1  12  270.77    6.30
   1   4  12  120.89    5.30
   2   6  12   85.69    5.10
  10  15  12    9.20    4.50
   3 -18  11   18.10   11.10
   1 -14  11    8.40    8.50
  -1  -6  11  172.88    5.00
  -1  -5  11   78.29    4.50
  -1  -4  11  301.37    5.40
   0   2  11   -4.00    3.60
   6  12  11    8.40    3.60
   1 -15  10   14.70    6.20
   0 -12  10  132.59    8.00
  -1  -8  10  230.18    5.50
  -1  -7  10  159.98    6.40
  -1  -3  10   89.79    5.90
  -1  -2  10   66.09    4.10
   1   5  10  136.09    4.20
   2   7  10   83.79    3.90
   4  10  10  139.49    3.30
   8  14  10   41.40    3.20
   2 -17   9   72.29    8.90
   1 -15   9   54.29    8.10
  -1  -9   9  125.59    4.50
  -1  -8   9   19.40    5.70
  -1  -1   9   16.20    3.60
   0   3   9   -3.10    2.90
   4 -20   8    1.10    9.10
   0 -13   8  138.69    6.70
  -1  -9   8   17.60    5.70
  -1  -1   8  174.08    4.90
   0   3   8   17.30    3.60
   3   9   8   85.19    2.70
   0 -13   7    0.00    5.90
  -1  -9   7  197.98    5.40
   3   9   7  221.38    2.50
  -1  -9   6  500.95    5.50
   4 -20   5    3.00    7.80
  -1  -9   5  281.97    4.50
  10  16   5   33.10    3.20
   4 -20   4   52.39    6.50
   2 -17   4   47.30    5.30
   1 -15   4   71.29    4.70
  -1  -1   4  588.04    3.10
   5 -21   3   82.19    7.10
   0 -12   3    1.50    4.30
  -1  -2   3 1273.87    4.00
  12  17   3    1.60    5.50
  14  18   3   34.50    7.30
   3 -18   2  121.09    5.00
   8  14   2   32.50    3.60
  11  16   1    6.80    5.60
  13  17   1   67.19    7.60
   1 -13   0   54.19    2.50
  10  15   0   23.40    5.50
   1 -12  -1  133.19    2.10
   2   5  -1   82.19    2.00
   3   7  -1  666.43    3.40
   6  11  -1  215.28    3.80
   7  12  -1  268.67    4.20
   8  13  -1    3.20    3.90
  14  17  -1   31.90    9.10
  13  16  -2   -2.70    7.50
  15  17  -2    7.80   10.70
   2   3  -3  303.37    3.40
   4   7  -3   48.50    2.40
   7  11  -3  356.26    5.10
   8  12  -3  110.29    5.00
  12  15  -3    3.70    7.20
  14  16  -3   19.90    9.00
   1  -5  -4  283.07    2.10
   6   9  -4  294.47    3.70
  10  13  -4   29.00    6.40
  13  15  -4    7.00    8.50
  15  16  -4    5.60   10.40
   3   3  -5   39.90    3.90
   4   5  -5  128.99    3.30
  14  15  -5   20.40   10.00
  16  16  -5   13.70   10.90
   3 -11  -6  110.29    2.30
   3   1  -6   40.70    4.30
  12  13  -6   19.30    6.50
   6 -16  -7   14.70    3.00
   4 -12  -7    1.80    2.60
   3  -8  -7   41.20    3.20
   3  -2  -7   99.89    4.20
   4   2  -7   29.50    4.70
   6   6  -7  173.08    4.30
   9  10  -7  320.67    7.40
  13  13  -7   35.10   10.20
  15  14  -7   -2.00   10.50
   4  -9  -8  425.06    4.00
   4  -1  -8  132.99    3.70
   9   9  -8   52.79    6.90
  10  10  -8   25.40    7.40
  13  12  -8   15.80    7.00
  16  14  -8    6.80   11.40
   6 -13  -9   45.00    4.30
   5 -10  -9   59.79    3.90
   5   0  -9    1.10    5.40
   6   3  -9  341.77    6.70
   7   5  -9    6.80    6.30
  14  12  -9    1.80   11.30
  16  13  -9   14.30   13.60
   7 -13 -10   23.30    5.30
   6 -10 -10   32.60    4.60
   6   0 -10  135.29    4.40
   7   3 -10  280.97    6.70
   8   5 -10  182.38    7.20
   9   6 -10   37.90    5.40
  13  10 -10   25.00    8.20
  14  11 -10   52.49   12.10
  16  12 -10   13.00   14.40
  10 -16 -11    9.60    7.30
   7 -10 -11   31.40    5.70
   7   0 -11    0.00    6.20
   8   3 -11   17.30    7.00
  10   6 -11  111.29    8.60
  11   7 -11   10.70    8.60
  12   8 -11   64.39    9.70
  13   9 -11   40.30   11.60
  16  11 -11   19.70   14.60
  10 -14 -12   85.39    8.60
   9 -12 -12   93.39    7.30
   8 -10 -12   50.89    7.40
   8  -9 -12  119.89    6.70
   8  -1 -12   18.90    5.40
   8   0 -12  138.49    7.40
   9   2 -12   20.40    5.60
  10   4 -12   21.40    8.60
  15   9 -12   -3.50   13.90
  17  10 -12    6.20   12.00
  11 -13 -13   -4.30    8.60
  10 -11 -13   17.80    8.00
   9  -9 -13   68.39    7.30
   9  -8 -13   15.50    7.90
   9  -2 -13   23.60    7.60
   9  -1 -13   20.20    8.10
  10   1 -13   15.80    6.90
  11   3 -13   12.00    7.00
  13   6 -13   14.70   11.20
  14   7 -13   21.60   11.70
  16   8 -13    6.10   11.40
  12 -12 -14    1.80   10.30
  11 -10 -14   14.80    9.70
  10  -6 -14   29.50    9.00
  10  -5 -14  118.59    9.20
  10  -4 -14  102.49    9.50
  10  -3 -14  113.29    9.10
  11   0 -14   -1.00   10.30
  12   2 -14   15.10    9.70
  13   4 -14    1.40   10.80
  14   5 -14   16.30   12.60
  15   6 -14   42.00   13.20
  13 -10 -15   12.40   11.10
  12  -8 -15   18.00   11.10
  12  -7 -15   10.20   11.40
  12  -6 -15    5.30   10.40
  12  -5 -15   42.70    8.10
  12  -4 -15   12.40    8.30
  12  -3 -15   22.00   11.90
  12  -2 -15   25.60   11.50
  13   0 -15    1.70    9.00
  13   1 -15   32.30   11.10
  14   2 -15    7.60   12.10
  15   3 -15   -2.30    9.90
  16   4 -15    6.30   11.00
  14  -8 -16   23.30   12.60
  14  -7 -16   -3.40   13.60
  14  -6 -16   18.20   13.10
  14  -5 -16    3.50   13.10
  14  -4 -16   13.60   12.50
  14  -3 -16    1.30   13.50
  14  -2 -16   22.20   14.00
  15  -1 -16    6.40   11.20
  15   0 -16    0.40   14.80
  16   1 -16   18.40   12.30
  16   2 -16    5.20   15.30
   4  -6  21    4.00   12.30
   4  -5  21   14.60   12.20
   4  -4  21    6.20   11.60
   5   1  21    6.10   13.70
   6   3  21   56.39   13.30
   4  -9  20   47.80   15.20
   4   0  20  172.88   13.20
   5   3  20    9.80   13.10
   6   5  20    8.10   12.10
   3  -9  19   15.30   10.20
   3  -8  19   77.19   13.80
   3  -2  19   16.50   11.40
   3  -1  19   13.90   12.00
   4   2  19    3.00   10.40
   5   5  19    3.70    8.00
   7   8  19    7.40    9.80
   3 -11  18    7.30   15.00
   2  -7  18   30.70    8.70
   2  -6  18   20.40    8.90
   2  -5  18   19.00   10.70
   2  -4  18   24.10   10.20
   2  -3  18   19.80    8.10
   3   1  18   22.20    9.60
   3   2  18   -2.20    7.00
   4   4  18   15.30   10.10
   5   6  18   16.40    9.70
   7   9  18   63.49    8.70
   8  10  18   38.10   10.20
   3 -13  17   14.30   11.00
   2 -10  17   10.00    9.10
   2  -9  17    9.00   12.00
   2   0  17   56.19    9.70
   3   3  17    4.10    8.90
   5   7  17  309.97    9.10
   3 -14  16   69.79   14.00
   2 -11  16   86.39   12.70
   1  -7  16    9.00    7.30
   1  -6  16  137.29    9.90
   1  -5  16   15.60    9.60
   1  -4  16  257.87    9.90
   1  -3  16    8.30    8.80
   1  -2  16   10.30    6.20
   2   2  16    9.10    7.60
   5   8  16   17.50    7.60
   3 -15  15   20.70   13.90
   2 -13  15   80.59   11.80
   1 -10  15   37.20    7.60
   1  -9  15   87.69   10.10
   1   0  15    6.90    7.10
   2   3  15  102.39    7.80
   6  10  15   19.70    6.40
   7  11  15   40.30    7.10
   8  12  15   98.39    7.10
   9  13  15   21.10    6.20
   3 -16  14   87.19   12.50
   2 -14  14   55.89   11.10
   1 -11  14   81.19   10.60
   0  -5  14  212.78    6.50
   1   1  14    5.10    6.80
   2   4  14   37.00    6.50
   4   8  14   18.60    6.10
   4 -18  13   36.40   14.30
   1 -12  13   46.30    9.60
   0  -8  13  -10.20    7.90
   0  -7  13    8.10    7.70
   0  -2  13    0.00    7.30
   0  -1  13   -1.90    5.10
   2   5  13   61.99    5.80
   3   7  13   65.89    5.40
   5  10  13   43.10    4.90
   6  11  13    2.80    5.30
   7  12  13   71.19    5.40
   8  13  13  119.99    5.40
   3 -17  12   78.49   11.80
   2 -15  12   23.50    9.30
   1 -13  12   41.10    9.40
   0 -10  12    7.40    5.60
   0  -9  12  211.18    7.80
   0   0  12  173.38    6.10
   4   9  12   41.80    5.20
   4 -19  11   32.30   12.60
   2 -16  11   10.00    9.80
   0 -11  11   -5.70    5.50
   0   1  11    0.20    5.40
   1   4  11  314.17    5.10
   3   8  11   23.60    4.00
   3 -18  10  149.99   10.60
   2 -16  10   40.10    9.00
   1 -14  10  219.88    8.60
   0 -11  10   56.19    7.10
  -1  -6  10   82.39    4.70
  -1  -5  10  141.49    4.60
  -1  -4  10   31.60    4.30
   0   2  10  132.09    3.70
   5  11  10   22.60    3.50
   3 -18   9   40.80    9.10
   0 -12   9    3.70    6.60
  -1  -7   9   55.09    5.40
  -1  -6   9   85.99    5.70
  -1  -5   9  106.99    5.60
  -1  -4   9  268.97    5.70
  -1  -3   9  141.69    5.70
  -1  -2   9  728.03    5.30
   1   5   9   92.19    3.50
   2   7   9   82.39    3.40
   4  10   9    4.90    3.00
   1 -15   8  142.09    6.90
   0 -12   8  164.48    6.70
  -1  -8   8  397.26    5.90
  -1  -7   8  241.38    5.50
  -1  -2   8  274.67    5.30
   5 -21   7   22.40   10.20
   4 -20   7   -4.10    8.00
  -1  -8   7  534.15    5.70
  -1  -1   7  415.06    3.70
   0   3   7    2.10    2.90
   5 -21   6   17.50    9.50
   4 -20   6   39.90    8.10
   2 -17   6    2.60    6.70
  -1  -8   6  147.39    4.70
  -1  -1   6   63.09    3.80
   0   3   6 1070.79    4.00
   3   9   6  185.48    1.70
   5 -21   5   39.20    9.00
   2 -17   5   43.30    6.10
   1 -15   5   16.30    5.10
  -1  -8   5  233.08    4.50
  -1  -1   5  134.09    2.90
   0   3   5    0.20    2.20
   5 -21   4   10.30    6.80
   0 -12   4   87.79    4.10
  -1  -2   4  428.46    3.90
  10  16   4   68.19    3.90
   3 -18   3   82.69    5.60
  -1  -3   3   99.59    3.00
   1   5   3  156.78    1.00
   1 -14   2   36.90    3.90
   4 -19   1   67.19    4.60
   6  12   1  100.39    3.10
   7  13   1   34.40    3.50
   6 -21   0   -2.50    5.10
   3 -17   0  119.39    3.90
  13  17   0    2.80    7.70
   4 -18  -1   32.80    3.30
   5  10  -1  320.77    3.50
   9  14  -1  102.19    5.00
  12  16  -1    7.70    6.40
   6 -20  -2   15.10    3.40
   4   8  -2  181.08    3.30
  11  15  -2    9.10    6.50
   6  10  -3  178.88    4.60
   9  13  -3   50.69    5.30
   1  -6  -4   37.90    1.50
   1  -4  -4  204.48    1.90
   2   2  -4  606.04    4.10
   5   8  -4   47.10    4.10
  11  14  -4   26.50    7.40
   2   0  -5  999.10    4.50
   5   7  -5  263.87    3.90
   8  11  -5  121.49    5.90
  12  14  -5   72.79    7.70
   2  -5  -6   31.40    2.50
   4   4  -6   80.89    3.50
   5   6  -6    7.40    4.60
   7   9  -6  337.47    6.10
   8  10  -6  190.38    6.00
   9  11  -6   21.10    6.60
  10  12  -6  206.18    7.60
  13  14  -6   26.20    8.70
  15  15  -6    9.00   10.80
   3  -1  -7  116.49    4.60
   7   8  -7  195.28    6.20
   8   9  -7   25.90    4.60
  10  11  -7   22.00    5.30
  11  12  -7  101.79    8.40
  14  14  -7   23.90   10.50
  16  15  -7   13.90   12.90
   9 -19  -8    1.60    4.60
   4 -10  -8   93.69    3.80
   4   0  -8  404.26    4.30
   5   3  -8  123.29    4.20
   6   5  -8   44.90    4.20
   8   8  -8   47.30    6.60
  11  11  -8   13.00    8.00
  12  12  -8    6.50    9.00
  14  13  -8   38.30    8.10
   7 -15  -9   38.60    4.50
   5   1  -9   68.49    5.60
   8   7  -9   55.99    7.10
   9   8  -9   80.39    7.30
  10   9  -9   58.49    5.80
  11  10  -9   10.80    8.60
  12  11  -9   53.69    9.70
  15  13  -9   -2.50   12.50
   8 -15 -10   25.90    5.60
   6 -11 -10    9.80    5.40
   5  -6 -10   76.89    5.10
   5  -5 -10   49.20    5.00
   5  -4 -10   56.89    5.00
   5  -3 -10  104.59    5.20
   6   1 -10  173.38    4.50
   9   7 -10   -6.00    7.20
  10   8 -10   21.20    8.20
  11   9 -10   89.89    9.60
  12  10 -10   10.80   10.00
  15  12 -10   18.40   13.50
   9 -15 -11   37.20    7.20
   8 -13 -11   62.99    5.70
   7 -11 -11  200.08    5.90
   6  -7 -11    8.40    5.30
   6  -6 -11   62.69    5.70
   6  -5 -11   75.39    5.80
   6  -4 -11  205.38    6.00
   6  -3 -11  310.87    6.40
   7   1 -11   -2.30    6.70
   9   5 -11  145.69    6.00
  14  10 -11   15.40    9.30
  15  11 -11   26.50   13.50
   9 -13 -12   15.60    7.30
   7  -6 -12  188.78    7.30
   7  -5 -12   71.89    7.10
   7  -4 -12  162.78    7.30
   7  -3 -12   -7.70    6.50
   8   1 -12   24.60    7.40
   9   3 -12   49.40    8.40
  10   5 -12   22.30    8.60
  11   6 -12  157.28    9.90
  12   7 -12  100.19    8.00
  13   8 -12   -9.90   10.70
  14   9 -12   52.49   12.90
  16  10 -12   18.00   10.60
  11 -14 -13   33.70    9.60
  10 -12 -13   13.50    7.90
   9 -10 -13    0.10    7.00
   9   0 -13    4.90    8.20
  10   2 -13   36.40    7.00
  11   4 -13   95.89    9.40
  12   5 -13   16.90    7.60
  15   8 -13   26.40   10.10
  16   9 -13   20.60   15.60
  12 -13 -14    0.00    9.50
  11 -11 -14  123.09   10.10
  10  -8 -14   22.60    9.40
  10  -7 -14    6.00    6.40
  10  -2 -14   35.50    9.10
  10  -1 -14   48.60    9.40
  11   1 -14   -1.80    7.30
  12   3 -14  148.59   10.60
  16   7 -14   64.99   12.00
  13 -11 -15   40.80   11.00
  12  -9 -15   54.89   11.30
  11  -6 -15    4.40    9.40
  11  -5 -15   90.89    9.80
  11  -4 -15   13.40    9.60
  12  -1 -15   30.90    8.90
  12   0 -15   38.10   11.50
  13   2 -15   13.50   12.20
  14   3 -15   74.59   12.50
  15   4 -15   -4.80   10.20
  16   5 -15    7.20   11.70
  13  -7 -16   22.80   11.90
  13  -6 -16   33.00   13.20
  13  -5 -16    6.90   13.10
  13  -4 -16   21.50   12.50
  13  -3 -16   12.10   12.10
  14  -1 -16   69.29   10.50
  14   0 -16  156.58   14.30
  15   1 -16   -1.40   11.50
  15   2 -16   22.50   14.30
  16   3 -16   33.30   16.20
   5  -2  21   37.00   13.90
   5  -1  21    2.20   14.80
   5   0  21   -7.00   10.20
   6   2  21   -5.70   13.40
   4  -8  20   30.40   14.20
   4  -7  20   33.00   14.80
   4  -6  20   57.69   14.60
   4  -5  20    3.20   13.30
   4  -4  20   55.29   13.40
   4  -3  20   21.50   14.00
   4  -2  20   92.79   13.80
   4  -1  20   40.10    9.80
   5   2  20   97.89   13.30
   6   4  20    5.80   11.40
   7   6  20   25.20   12.60
   4 -11  19    1.10   15.40
   4 -10  19    2.60   14.80
   3  -7  19  104.39   10.00
   3  -6  19   63.29    9.90
   3  -5  19   10.40   11.60
   3  -4  19   32.10    9.30
   3  -3  19   22.60    9.30
   4   1  19   28.20   11.90
   5   4  19   27.20   11.20
   6   6  19   39.10   10.10
   3 -10  18    1.40   10.40
   3  -9  18   82.99   13.50
   3   0  18  -10.10   10.60
   4   3  18   62.69    9.20
   6   7  18   29.30   10.10
   4 -14  17   18.70   16.20
   3 -12  17   76.19   11.30
   2  -8  17   26.50    8.30
   2  -7  17   41.80   10.90
   2  -6  17   54.99   10.60
   2  -5  17   37.90    9.50
   2  -4  17  108.69    9.50
   2  -3  17  183.08   10.50
   2  -2  17   61.69    9.80
   2  -1  17  121.59    7.20
   3   2  17   30.90    9.20
   4   5  17   56.99    6.50
   6   8  17   50.59    8.80
   4 -15  16   80.59   15.70
   3 -13  16   33.60   13.90
   2 -10  16    2.10   11.40
   2   1  16   -2.70    7.80
   3   4  16   42.70    7.40
   4   6  16   41.10    8.10
   6   9  16   11.60    7.50
   7  10  16   74.29    8.10
   9  12  16   -1.30    8.40
   4 -16  15   10.20   15.20
   3 -14  15    2.50   12.50
   2 -12  15  116.29   11.60
   1  -8  15   24.30    7.00
   1  -7  15   19.00    9.40
   1  -6  15  356.96    9.00
   1  -3  15   54.69    8.20
   1  -2  15   -0.90    7.90
   1  -1  15   19.90    5.60
   3   5  15   92.69    7.20
   4   7  15    3.60    6.40
   4 -17  14   28.50   14.50
   3 -15  14    5.60   12.50
   2 -13  14   99.79   12.00
   1 -10  14    8.70    9.10
   1  -9  14  124.19    9.00
   1   0  14    1.20    7.10
   3   6  14   48.90    6.00
   5   9  14   88.99    6.10
  10  14  14   29.10    6.30
   3 -16  13  119.79   12.50
   2 -14  13  119.19   10.00
   1 -11  13   49.30    9.30
   0  -6  13    9.40    5.40
   0  -5  13   -0.40    5.20
   0  -4  13   -4.10    5.30
   0  -3  13    1.10    5.10
   1   2  13  109.39    5.90
   4 -18  12   55.39   12.30
   1 -12  12   36.80    9.20
   0  -8  12  242.48    7.80
   0  -2  12  348.67    6.80
   0  -1  12  263.07    6.40
   1   3  12   92.89    5.50
   3 -17  11   73.99   11.20
   2 -15  11   16.70    8.80
   1 -13  11   81.09    9.00
   0 -10  11    2.90    5.30
   0  -9  11   -1.40    6.90
   0   0  11   -4.00    5.50
   2   6  11  134.99    4.60
   4 -19  10   23.70   11.60
   0 -10  10  165.58    7.00
   0   1  10  241.38    5.10
   6  12  10   22.40    3.40
   7  13  10   24.80    3.40
   2 -16   9   28.60    8.70
   1 -14   9  165.38    7.90
   0 -11   9    0.90    6.60
   0   2   9   -2.30    3.00
   1 -14   8   20.10    6.60
  -1  -6   8  197.28    5.60
  -1  -5   8  132.49    5.50
  -1  -4   8  356.96    5.90
  -1  -3   8   67.89    3.90
   1   5   8  122.39    3.20
   2   7   8   78.79    3.20
   3 -18   7    0.90    7.90
   0 -12   7   -6.10    5.40
  -1  -7   7   51.69    4.70
  -1  -6   7  331.27    5.30
  -1  -3   7  445.26    5.10
  -1  -2   7   99.79    3.30
   3 -18   6   60.49    7.90
   0 -12   6  337.47    6.00
  -1  -7   6  201.88    4.60
  -1  -2   6  756.42    5.00
   3 -18   5   56.89    7.60
  -1  -7   5  370.56    4.70
  -1  -2   5  282.07    4.00
   3 -18   4    7.70    6.60
  -1  -7   4   17.00    2.60
  -1  -6   4   31.00    3.20
  -1  -3   4  252.57    3.60
   1 -14   3  114.59    4.70
  -1  -4   3   14.30    2.90
   4 -19   2   69.29    5.50
   2 -16   2  114.29    3.90
   0 -11   2   18.00    2.80
   4  10   2  370.06    2.00
   9  15   2    6.40    3.80
  12  17   2   13.20    5.40
  14  18   2    8.30    7.30
   5 -20   1  149.79    5.60
   0 -10   1    2.40    2.40
   5  11   1  709.83    3.40
   8  14   1  123.79    4.10
   2 -15   0   70.19    3.10
   0  -9   0  216.38    2.00
  11  16   0    6.00    6.00
  10  15  -1   14.10    5.60
   7 -21  -2   18.90    3.90
   7  12  -2   25.90    4.10
   8  13  -2   67.39    5.00
  14  17  -2   11.40    9.10
   1   0  -3   -3.50    1.90
   5   9  -3  278.47    4.00
  10  14  -3   13.90    6.30
  13  16  -3   10.00    8.00
  15  17  -3   13.80   10.30
   1  -3  -4  215.58    2.30
  12  15  -4   10.60    7.60
  14  16  -4    5.50    9.70
   3 -13  -5  147.19    1.50
   6   9  -5  180.28    4.70
   7  10  -5  363.56    5.70
   9  12  -5    5.40    5.90
  10  13  -5   28.60    6.70
  13  15  -5    1.40    9.10
  15  16  -5    6.30   10.60
   4 -14  -6    5.90    2.20
   2  -6  -6   47.00    2.30
   2  -4  -6  350.06    2.80
   2  -3  -6   12.90    3.00
   3   2  -6  237.58    4.80
   6   8  -6   46.30    5.10
  11  13  -6   69.89    8.10
  14  15  -6   15.30   10.30
   8 -19  -7   18.40    3.40
   3  -9  -7  204.68    2.80
   4   3  -7  256.77    5.40
   5   5  -7  292.37    4.30
   6   7  -7    2.60    5.50
  12  13  -7  214.38    9.90
   8 -18  -8   20.50    4.30
   6 -15  -8   24.00    3.60
   5 -13  -8    2.40    3.30
   4   1  -8  149.88    5.50
   7   7  -8   82.49    4.80
  13  13  -8   47.20   10.70
  15  14  -8    2.90   11.10
   9 -18  -9   47.80    5.30
   5 -11  -9  140.79    3.80
   4  -6  -9   36.80    4.20
   4  -5  -9   15.10    4.30
   4  -4  -9   97.49    4.60
   4  -3  -9  140.69    4.80
   6   4  -9  218.28    6.20
   7   6  -9   50.29    6.70
  13  12  -9   79.29    9.50
   5  -8 -10   23.80    4.20
   5  -7 -10   72.29    4.60
   5  -2 -10  295.77    5.90
   6   2 -10   85.59    6.20
   7   4 -10   64.29    5.00
   8   6 -10   71.19    7.30
  13  11 -10    7.80   10.40
  16  13 -10   11.80   14.50
   6  -8 -11   35.60    5.40
   6  -2 -11  318.37    5.10
   6  -1 -11  240.88    6.70
   7   2 -11  238.38    7.50
   8   4 -11   39.30    5.50
   9   6 -11   31.30    7.50
  10   7 -11   87.59    8.40
  11   8 -11   28.30    7.00
  12   9 -11   51.19    7.70
  13  10 -11   35.30   12.20
  16  12 -11   15.20   15.30
  11 -16 -12    0.60    7.90
  10 -15 -12   20.10    7.90
   8 -11 -12  136.69    6.90
   7  -8 -12   39.20    6.50
   7  -7 -12   43.10    6.20
   7  -2 -12  178.68    6.90
   7  -1 -12    0.80    6.80
   8   2 -12  157.08    8.00
   9   4 -12   24.60    8.40
  11   7 -12   40.90    9.70
  12   8 -12    5.00   10.20
  15  10 -12   23.10   10.00
  16  11 -12   -1.30   14.10
  10 -13 -13   12.00    8.20
   9 -11 -13  126.69    8.40
   8  -7 -13   52.39    7.20
   8  -6 -13   16.30    7.70
   8  -5 -13   15.90    5.80
   8  -4 -13   13.10    7.30
   8  -3 -13  235.48    8.20
   8  -2 -13   22.40    7.70
   9   1 -13   12.80    7.80
  10   3 -13  110.19    7.10
  11   5 -13   11.80   10.20
  12   6 -13   22.30   10.00
  13   7 -13  155.48    9.00
  14   8 -13   51.49   13.50
  15   9 -13   16.70   14.60
  11 -12 -14   -1.20    9.60
  10 -10 -14   65.99    8.60
  10  -9 -14   49.80    8.50
   9  -5 -14    5.00    7.90
   9  -4 -14   79.29    8.90
  10   0 -14   36.90    8.90
  11   2 -14   16.60    7.50
  12   4 -14   45.80   10.90
  13   5 -14   34.60    8.70
  14   6 -14   -0.30    9.10
  15   7 -14   60.49   11.30
  16   8 -14   38.90   17.40
  12 -11 -15   78.79   10.40
  12 -10 -15   12.00    8.80
  11  -8 -15   52.09   10.60
  11  -7 -15   29.60   10.00
  11  -3 -15   18.90    7.70
  11  -2 -15   33.70   10.60
  11  -1 -15   -1.20   10.80
  12   1 -15   32.40   10.80
  13   3 -15   48.60   12.10
  14   4 -15   30.30    9.80
  15   5 -15   16.60   10.60
  16   6 -15    2.10   15.20
  13  -9 -16   33.60   11.50
  13  -8 -16   16.40   12.50
  13  -2 -16   56.39    9.40
  13  -1 -16   17.90   13.10
  14   1 -16   73.39   13.50
  15   3 -16   -6.20   14.90
  16   4 -16   27.70   16.60
  15  -3 -17    1.50   11.90
  15  -2 -17    2.70   15.90
  15  -1 -17   11.60   16.10
   5  -5  21   23.90   15.40
   5  -4  21   19.00   15.60
   5  -3  21   24.70   11.70
   6   1  21   36.70   15.20
   7   4  21    6.80   13.50
   5   1  20   -1.10   11.90
   4  -9  19    6.20   14.60
   4  -8  19   24.20   13.10
   4   0  19  110.69   12.30
   5   3  19   19.70   11.40
   6   5  19   90.49   11.40
   7   7  19   93.99   10.30
   8   8  19   -2.00   10.20
   4 -12  18   35.10   12.30
   4 -11  18   25.10   14.30
   3  -8  18   10.00    9.40
   3  -7  18  156.28   11.90
   3  -6  18   44.20   11.10
   3  -3  18   34.20   10.30
   3  -2  18   -3.20   11.10
   3  -1  18   18.80    7.60
   4   2  18   32.80    9.30
   5   5  18    5.60    9.20
   7   8  18   12.60    9.80
   4 -13  17   28.20   14.60
   3 -11  17    4.70   10.20
   3 -10  17   46.00   12.40
   3   1  17   26.50    9.40
   4   4  17   46.60    8.80
   5   6  17   38.60    8.90
   7   9  17   29.10    8.70
   8  10  17    4.20    9.20
   9  11  17   48.30    9.90
   4 -14  16   47.40   13.60
   3 -12  16   19.80   12.90
   2  -9  16   64.29    8.30
   2  -8  16    9.90   10.00
   2  -1  16   -1.60    8.50
   2   0  16   77.29    6.00
   3   3  16   88.69    8.10
   5   7  16   41.00    7.70
   8  11  16   42.50    7.60
   3 -13  15   55.49   12.10
   2 -11  15   27.50    8.40
   2 -10  15    2.10    9.80
   1  -5  15   35.50    6.50
   1  -4  15  176.08    6.80
   2   2  15  181.58    6.00
   5   8  15  303.77    7.60
   4 -16  14   28.60   12.70
   2 -12  14   48.60   10.60
   1  -8  14   25.50    8.90
   1  -1  14    8.00    7.20
   2   3  14    9.70    7.10
   6  10  14   41.30    6.60
   9  13  14   42.80    6.40
   4 -17  13   15.20   12.90
   3 -15  13    2.80   10.90
   2 -13  13  111.49   10.60
   1 -10  13   68.39    8.90
   1   1  13   34.30    6.40
   2   4  13   96.59    6.20
   4   8  13   21.60    5.10
  11  15  13   10.20    5.50
   3 -16  12   12.40   11.20
   2 -14  12   -6.30    9.60
   1 -11  12   76.79    8.60
   0  -7  12  138.29    5.50
   0  -6  12   91.39    6.90
   0  -5  12    1.50    6.70
   0  -4  12  213.78    7.10
   0  -3  12  132.69    4.80
   1   2  12  160.38    5.90
   2   5  12   28.30    5.00
   3   7  12   61.39    4.80
   5  10  12   25.80    4.40
   9  14  12   51.99    4.60
   4 -18  11   13.60   11.60
   1 -12  11   92.79    8.50
   0  -8  11    3.00    7.00
   0  -1  11   -1.10    5.50
   1   3  11  262.67    5.30
   4   9  11   30.00    4.40
   3 -17  10    5.70    9.90
   2 -15  10    3.80    8.90
   1 -13  10   14.50    7.70
   0  -9  10  120.59    7.10
   1   4  10   28.30    4.10
   2   6  10  113.79    4.70
   3   8  10  207.88    3.90
  11  16  10   43.00    3.20
   0 -10   9    1.00    6.30
   0   1   9   -2.90    4.40
   5  11   9  144.89    3.30
   8  14   9  116.89    2.90
   2 -16   8   84.89    7.40
   0 -11   8   80.79    5.40
   0   2   8 1086.29    4.70
   4  10   8   95.29    2.50
   9  15   8   22.50    1.90
   4 -19   7   21.60    9.20
   1 -14   7    8.50    6.20
   0 -11   7   -0.40    5.30
  -1  -5   7   28.80    3.50
  -1  -4   7  169.68    3.60
   1   5   7   37.70    2.60
   2   7   7  313.17    2.80
  -1  -6   6  185.88    3.60
  -1  -5   6  271.07    4.80
  -1  -4   6  178.98    4.40
  -1  -3   6  342.77    3.60
   2 -16   5   46.80    6.30
  -1  -6   5  148.09    3.20
  -1  -5   5   97.59    4.00
  -1  -4   5  267.17    4.20
  -1  -3   5   14.60    2.80
  13  18   5   30.80    5.00
   2 -16   4   37.90    5.70
   1 -14   4  129.39    4.70
  -1  -5   4  327.67    3.80
  -1  -4   4  246.68    3.60
   4 -19   3   10.20    6.30
   2 -16   3    4.20    4.30
   0 -11   3   -1.00    3.60
  10  16   3   31.50    3.80
   6 -21   1   26.00    6.20
   3 -17   1   56.59    4.50
   1 -13   1   84.09    3.20
   9  15   1   52.29    4.30
  12  17   1   53.19    6.30
  14  18   1   38.20    7.80
   2   6   0  923.71    2.50
   7  13   0    5.60    3.70
   0  -7  -1    2.10    1.10
   4   9  -1   87.09    3.00
  13  17  -1   76.79    7.70
   6  11  -2  319.37    4.40
   9  14  -2   11.60    5.20
  12  16  -2   18.10    6.90
   3   6  -3  131.29    3.20
  11  15  -3   57.59    6.70
   1  -7  -4   13.30    1.20
   1  -2  -4  367.76    2.80
   3   5  -4  141.79    2.90
   4   7  -4  185.58    4.20
   6  10  -4   95.99    4.30
   7  11  -4    9.50    4.80
   8  12  -4   12.00    5.00
   9  13  -4    9.50    6.00
   2 -10  -5  177.18    1.70
   2   1  -5 1986.70    5.70
   3   4  -5  227.18    4.40
   4   6  -5   42.70    4.30
  11  14  -5   78.69    7.60
   5 -16  -6   61.79    2.00
   2  -7  -6   23.00    2.00
   2  -2  -6  315.87    3.80
   4   5  -6  259.37    5.30
  12  14  -6   14.50    8.10
   3   0  -7    0.00    3.20
   8  10  -7   39.50    6.90
   9  11  -7   18.00    7.20
  10  12  -7   41.60    7.30
  13  14  -7  100.59   10.20
  15  15  -7   35.90    9.10
   3  -5  -8   30.60    3.50
   3  -4  -8  247.48    4.20
   5   4  -8    1.00    4.00
   6   6  -8   46.10    4.10
   8   9  -8   21.80    7.00
   9  10  -8    5.00    7.50
  10  11  -8  147.89    8.40
  11  12  -8   19.80    8.60
  14  14  -8   11.10   11.40
   8 -17  -9   18.90    4.90
   4  -8  -9   28.10    4.40
   4  -7  -9   73.39    4.00
   4  -2  -9  152.78    3.60
   4  -1  -9  808.32    6.10
   5   2  -9   74.49    4.20
   8   8  -9    9.90    6.70
   9   9  -9  288.87    8.30
  10  10  -9   87.89    8.80
  11  11  -9   98.09    9.20
  14  13  -9    4.80   10.90
  16  14  -9   29.00   10.60
   9 -17 -10    8.20    5.70
   7 -14 -10   36.80    5.20
   6 -12 -10   20.60    5.20
   5  -9 -10  205.68    5.30
   5  -1 -10   25.40    4.10
   5   0 -10   -2.80    5.20
   6   3 -10  153.78    6.70
   7   5 -10  418.76    7.80
   9   8 -10   36.20    7.40
  10   9 -10    7.00    8.60
  11  10 -10   58.29    9.50
  12  11 -10   27.50    9.90
  14  12 -10    9.40    8.70
  15  13 -10   12.30   12.50
   8 -14 -11   29.10    6.40
   7 -12 -11   31.00    5.30
   6  -9 -11   35.10    5.40
   6   0 -11  562.04    7.50
   7   3 -11   69.49    7.00
   8   5 -11    8.00    7.70
  14  11 -11   31.90    9.20
  15  12 -11    0.90   13.40
   9 -14 -12   44.30    7.70
   8 -12 -12   12.60    6.30
   7  -9 -12   18.40    6.30
   7   0 -12   -3.00    7.20
   8   3 -12   11.60    7.90
  10   6 -12   17.60    8.90
  13   9 -12   64.29    9.10
  14  10 -12   20.30   13.20
  11 -15 -13   10.60   10.00
   8  -9 -13    8.60    6.90
   8  -8 -13   -0.50    6.80
   8  -1 -13   26.20    7.30
   8   0 -13   69.49    7.50
   9   2 -13   32.80    6.20
  10   4 -13   64.89    9.00
  12   7 -13   -1.00   11.00
  13   8 -13   89.09   13.20
  16  10 -13    7.90   14.40
  10 -11 -14   92.69    8.70
   9  -8 -14   54.99    8.40
   9  -7 -14    5.90    8.30
   9  -6 -14   92.59    6.40
   9  -3 -14   38.90    6.70
   9  -2 -14   83.39    9.10
   9  -1 -14   46.20    8.10
  10   1 -14   50.29    7.40
  10   2 -14   32.50    9.10
  11   3 -14  137.39    7.70
  12   5 -14   50.39   11.50
  13   6 -14   38.20   11.40
  14   7 -14   10.20   12.80
  15   8 -14   26.90   15.20
  11  -9 -15   16.90   10.20
  10  -5 -15   16.20    8.90
  10  -4 -15  144.89    9.50
  11   0 -15    8.80    9.90
  12   2 -15   15.70    8.50
  13   4 -15   37.40   12.40
  14   5 -15  108.09   13.00
  15   6 -15   28.50   14.30
  12  -7 -16   19.80   11.90
  12  -6 -16    0.80   11.20
  12  -5 -16   53.89   11.00
  12  -4 -16   89.49   11.40
  12  -3 -16   23.50   11.60
  12  -2 -16   23.40   12.60
  13   0 -16    2.40    9.60
  13   1 -16   16.90   13.60
  14   2 -16   43.80   10.70
  14   3 -16   -3.60   13.10
  15   4 -16   10.10   15.20
  14  -5 -17   36.20   13.90
  14  -4 -17   44.80   13.80
  14  -3 -17   45.60   13.70
  14  -2 -17   18.70   14.80
  14  -1 -17   -2.00   13.90
  15   0 -17   15.30   15.60
  15   1 -17    4.00   15.30
   6  -1  21   60.29   15.10
   6   0  21   57.99   13.40
   7   3  21   -7.80   13.30
   5  -8  20    0.30   15.20
   5  -7  20   37.90   15.60
   5  -2  20   95.59   13.40
   5  -1  20   -1.90   13.40
   5   0  20   -4.40    9.20
   6   2  20    5.20   12.50
   6   3  20    0.70    9.60
   7   5  20   26.80   11.80
   4  -7  19   46.10   12.70
   4  -6  19    3.30   13.40
   4  -5  19   17.40   12.60
   4  -4  19   33.00   12.50
   4  -3  19   21.80   12.50
   4  -2  19    7.70   12.80
   4  -1  19   33.80    9.10
   5   2  19   34.40   11.40
   7   6  19   19.90   10.40
   4 -10  18   40.50   14.40
   3  -5  18   45.40    8.40
   3  -4  18   49.80    8.50
   4   1  18  290.27   11.00
   5   4  18    5.40   10.60
   6   6  18    9.50    9.80
   8   9  18   16.20    9.20
   9  10  18   12.80   10.10
   4 -12  17   10.70   15.00
   3  -9  17   43.30   11.20
   3  -8  17   18.70   10.90
   3   0  17   -3.10    9.60
   4   3  17    5.80    8.60
   6   7  17   26.10    8.30
   3 -11  16    5.00   13.00
   2  -7  16   16.40    7.40
   2  -6  16   23.20    9.80
   2  -5  16  117.49    9.80
   2  -4  16  125.19    9.70
   2  -3  16   19.10    9.40
   2  -2  16   13.50    6.50
   3   2  16   71.39    8.60
   4   5  16   58.09    7.50
   6   8  16   -2.60    8.30
   4 -15  15   31.10   10.50
   2  -9  15   47.20   10.50
   2   0  15  186.48    7.70
   2   1  15   65.89    5.70
   3   4  15   11.20    5.30
   4   6  15   80.79    7.00
   6   9  15   40.10    6.60
   5 -17  14   12.90   13.60
   3 -14  14   65.29    9.00
   2 -11  14    8.00   10.10
   1  -7  14  156.08    6.90
   1  -6  14  144.79    8.10
   1  -5  14  319.47    8.90
   1  -4  14  123.09    8.10
   1  -3  14   40.20    7.10
   1  -2  14   50.09    5.30
   2   2  14   94.39    7.30
   3   5  14   52.69    6.50
   4   7  14   98.29    5.90
   7  11  14   88.59    5.90
   8  12  14   34.50    6.60
   2 -12  13   62.09   10.10
   1  -9  13   21.00    6.40
   1  -8  13   15.00    7.50
   1   0  13    7.60    6.50
   3   6  13   66.59    5.30
   5   9  13  120.09    6.20
   4 -17  12   -4.40   11.50
   2 -13  12   48.50    9.60
   1 -10  12   31.60    8.00
   6  11  12    4.90    4.00
   7  12  12   50.19    4.90
   8  13  12   52.29    4.80
   5 -19  11   61.29   12.70
   3 -16  11   37.50   10.70
   2 -14  11    6.50    9.00
   1 -11  11   19.90    7.30
   0  -7  11    0.80    5.00
   0  -6  11   -2.10    6.50
   0  -5  11   -2.40    6.20
   0  -4  11   -4.70    6.00
   0  -3  11    3.60    6.00
   0  -2  11   -0.10    4.00
  10  15  11    8.50    3.60
   4 -18  10    8.40   10.90
   1 -12  10   41.20    7.80
   0  -8  10  539.25    7.30
   0  -1  10  242.38    5.50
   0   0  10  772.12    5.30
   3 -17   9   16.70    8.40
   2 -15   9   15.10    8.10
   1 -13   9   39.60    5.40
   0  -9   9    5.00    6.00
   1   4   9  222.18    4.10
   6  12   9   92.59    3.20
   5 -20   8   22.50   10.30
   1 -13   8  104.69    6.80
   0 -10   8  207.78    6.10
   5 -20   7   16.20   10.20
   0   2   7   -4.00    2.60
   4 -19   6   42.30    7.70
   0 -11   6  264.97    5.10
   0   2   6  233.88    3.40
   1   5   6  228.18    2.50
   2   7   6   26.10    1.90
  13  18   6    5.30    3.70
   4 -19   5   17.30    7.00
   1   5   5   84.59    2.20
   4 -19   4   10.00    6.20
   1   5   4  282.27    1.80
  13  18   4   11.70    5.20
   0   2   3   -2.30    1.80
  13  18   3   45.00    6.20
   6 -21   2    3.70    6.70
   5 -20   2   27.60    6.00
   0 -10   2  237.88    3.40
  10  16   2    8.50    4.40
   3   8   0   12.20    2.10
   6  12   0   14.60    3.00
   8  14   0   40.50    4.40
  14  18   0   32.60    8.60
   5 -19  -1   98.89    4.20
   3 -16  -1   49.80    3.00
   1   3  -1  370.16    2.00
  11  16  -1   -0.40    6.70
   1   2  -2 1137.09    3.30
   3   7  -2  363.06    3.20
   5  10  -2  137.79    3.70
  10  15  -2  141.09    6.80
   5 -18  -3   54.89    2.70
   2   4  -3  156.18    3.10
   4   8  -3   85.69    3.40
  12  16  -3   11.80    8.00
  14  17  -3    0.10    9.00
  10  14  -4   60.89    6.80
  13  16  -4    3.50    9.10
  15  17  -4   39.30   10.50
   5   8  -5  595.84    5.60
  12  15  -5   36.80    8.50
  14  16  -5   16.20    9.40
   2  -8  -6  169.08    2.30
   2  -1  -6  122.99    3.70
   3   3  -6    9.50    4.40
   5   7  -6  102.39    3.80
   7  10  -6   83.49    5.70
   8  11  -6   54.49    6.50
   9  12  -6   11.60    6.60
  10  13  -6   66.09    7.40
  13  15  -6   59.49    9.70
  15  16  -6   14.80   10.70
   7 -18  -7   23.50    2.90
   5 -15  -7   78.89    2.80
   3 -10  -7  412.36    3.30
   3   1  -7  127.59    4.70
   4   4  -7  282.17    5.60
   5   6  -7  288.97    5.60
   7   9  -7   48.70    5.50
  11  13  -7   37.20    8.30
  14  15  -7   39.30   11.30
   7 -17  -8   85.79    4.00
   4 -11  -8  197.58    3.20
   3  -7  -8  276.97    4.30
   3  -6  -8  125.79    3.50
   3  -3  -8  282.77    4.30
   3  -2  -8   43.60    4.40
   4   2  -8  289.27    4.50
   7   8  -8  300.17    7.00
  12  13  -8   24.10   10.20
  15  15  -8   34.80   11.60
   6 -14  -9    9.00    4.00
   5 -12  -9   -1.40    4.00
   4   0  -9  326.07    5.50
   5   3  -9  137.09    6.00
   6   5  -9  254.47    5.10
   7   7  -9  166.48    7.20
  12  12  -9   33.70    7.10
  13  13  -9   31.10   11.30
  15  14  -9   60.59   12.00
   8 -16 -10    5.10    5.60
   8   7 -10   34.00    7.20
  13  12 -10   31.30   11.50
  10 -17 -11    4.70    7.20
   9 -16 -11   30.00    6.50
   6 -10 -11    4.50    5.10
   6   1 -11  221.98    6.90
   9   7 -11   21.10    8.30
  10   8 -11   66.89    6.40
  11   9 -11   19.50    7.30
  12  10 -11   11.70    8.10
  13  11 -11   37.20   12.10
   7 -10 -12   60.39    6.60
   7   1 -12   16.20    7.00
   9   5 -12   32.30    6.00
  10   7 -12   58.79    9.00
  11   8 -12  119.09   10.80
  12   9 -12   57.39   11.70
  13  10 -12   12.90   11.70
  15  11 -12   28.40   10.80
  10 -14 -13    7.80    8.50
   9 -12 -13  101.19    7.80
   8 -10 -13    9.60    6.60
   8   1 -13   28.40    8.00
   9   3 -13   75.99    6.30
  10   5 -13   41.80    9.70
  11   6 -13   52.59    7.20
  14   9 -13   17.60    9.90
  15  10 -13   21.60   15.20
  11 -13 -14   30.50    9.80
   9  -9 -14   18.10    8.60
   9   0 -14   -2.40    9.00
  10   3 -14  117.99    9.40
  11   4 -14   43.00    8.10
  12   6 -14   55.49   10.90
  13   7 -14   17.00   12.20
  14   8 -14    9.80   14.50
  12 -12 -15    2.20   10.30
  11 -10 -15   21.60    9.60
  10  -8 -15    3.80    9.00
  10  -7 -15   14.80   10.30
  10  -6 -15   19.80    7.10
  10  -3 -15   80.39    7.60
  10  -2 -15  114.29    9.80
  10  -1 -15   93.99   10.40
  11   1 -15    3.30    7.60
  11   2 -15   40.80   11.00
  12   3 -15   17.60    8.60
  13   5 -15   -6.70   12.80
  14   6 -15    8.60   14.00
  15   7 -15   35.50   16.50
  12  -9 -16    6.90   12.10
  12  -8 -16   15.80    8.70
  11  -5 -16    3.90   10.20
  11  -4 -16  106.59   10.90
  12  -1 -16   34.40    9.30
  12   0 -16    6.80   12.60
  13   2 -16   55.79   12.60
  14   4 -16    6.30   14.50
  15   5 -16    5.40   15.30
  13  -6 -17    7.30   14.30
  13  -5 -17   16.40   14.30
  13  -4 -17    9.30   14.00
  13  -3 -17   39.00   13.80
  13  -2 -17   32.50   13.00
  14   0 -17   13.50   15.90
  15   2 -17    2.30   16.60
   6  -4  21    4.70   15.80
   6  -3  21   64.39   14.90
   6  -2  21    7.80   11.40
   7   1  21    4.10   13.90
   7   2  21   14.50   11.30
   5  -6  20   52.19   11.20
   5  -5  20   21.70   11.10
   5  -4  20   25.20   11.10
   5  -3  20    0.60   10.30
   6   1  20   27.60   13.30
   7   4  20   41.90   12.50
   8   6  20   43.40   11.70
   5 -10  19   -1.70   12.10
   5  -9  19   22.40   14.50
   5   1  19   16.20   12.00
   6   4  19   18.50   10.40
   8   7  19   12.60   10.60
   5 -12  18   36.10   15.70
   4  -9  18    8.70    9.90
   4  -8  18   44.10   12.90
   4  -1  18  263.37   11.10
   4   0  18  100.69   11.00
   5   3  18   26.80    9.90
   7   7  18  133.69   10.60
   5 -13  17   21.00   14.30
   4 -11  17   33.70   13.90
   3  -7  17   36.50   10.30
   3  -6  17  -10.30   11.10
   3  -5  17   65.39   10.20
   3  -4  17   74.89   10.20
   3  -3  17   16.20   10.20
   3  -2  17   14.20    9.70
   3  -1  17   26.50    7.10
   4   2  17   36.80    8.70
   5   5  17   61.29    9.50
   7   8  17    5.20    8.50
   5 -15  16   12.70   11.80
   4 -13  16   69.69   10.60
   3 -10  16    2.70   10.70
   3  -9  16   11.20   10.60
   3   1  16   38.10    8.90
   4   4  16   34.90    8.00
   5   6  16   31.10    8.30
   7   9  16   57.19    8.60
   5 -16  15   94.89   11.20
   4 -14  15   36.10   11.80
   3 -12  15   37.90    8.60
   3 -11  15   54.19   10.90
   2  -8  15   18.80    7.00
   2  -7  15   47.70    9.60
   2  -2  15  186.48    8.00
   2  -1  15   73.99    8.10
   3   3  15   10.40    7.50
   7  10  15    7.50    6.60
   8  11  15   17.60    7.20
   9  12  15   89.79    8.10
  10  13  15    7.70    7.60
   4 -15  14   47.30   12.70
   3 -13  14   27.50   10.70
   2 -10  14   81.29    9.30
   2   1  14   51.69    7.00
   5   8  14   18.20    6.40
   4 -16  13    9.60    9.40
   3 -14  13   55.69   10.00
   2 -11  13  117.79    9.20
   1  -7  13  216.18    8.10
   1  -6  13   10.70    7.80
   1  -3  13  142.89    7.10
   1  -2  13  100.09    7.50
   1  -1  13   28.50    5.20
   2   3  13  250.27    6.20
  10  14  13    6.70    5.90
   5 -18  12    0.90   12.40
   3 -15  12   37.60    7.90
   1  -9  12    9.00    7.80
   1   1  12   22.10    4.20
   2   4  12   32.90    5.30
   4   8  12   26.50    4.50
   4 -17  11   52.29   11.30
   2 -13  11   85.99    8.30
   1 -10  11   62.89    7.20
   1   2  11   38.30    5.10
   2   5  11   44.50    4.40
   3   7  11  204.68    4.60
   5  10  11   33.30    4.40
   5 -19  10   10.80   11.60
   3 -16  10  120.69   10.10
   2 -14  10   73.79    8.40
   1 -11  10   52.49    7.00
   0  -7  10  311.87    5.40
   0  -6  10  182.68    6.40
   0  -3  10  245.78    5.80
   0  -2  10  147.69    5.70
   1   3  10   78.09    4.60
   4   9  10   53.29    3.90
   4 -18   9   33.30   10.00
   1 -12   9  138.99    7.30
   0  -8   9    0.00    5.70
   0   0   9    1.70    3.40
   2   6   9  174.58    3.80
   3   8   9  535.75    4.00
   7  13   9    6.20    2.80
   2 -15   8   88.79    7.50
   0  -9   8   48.50    5.70
   0   1   8  142.79    3.30
   1   4   8  354.46    3.80
   1 -13   7  149.39    6.10
   0 -10   7    2.70    3.70
   4  10   7    5.30    2.00
   6 -21   6   -3.80    9.40
   5 -20   6   15.50    8.40
   3 -17   6    6.70    7.70
   0 -10   6  111.19    4.70
   6 -21   5   41.10    9.10
   5 -20   5  172.68    8.00
   0   2   5    0.10    2.60
   2   7   5  150.98    1.70
   6 -21   4    9.60    8.50
   5 -20   4   12.50    6.90
   0   2   4  192.28    2.50
  11  17   4   87.49    4.30
   6 -21   3   22.00    7.10
   5 -20   3   41.20    6.30
   0 -10   3    3.40    3.10
   3 -17   2    9.70    4.70
   1 -13   2   65.99    3.30
  13  18   2    4.70    7.00
   2 -15   1  146.19    3.50
   4  10   1   24.30    2.10
  10  16   1   65.59    5.00
   4 -18   0   10.10    3.90
   1 -12   0   14.20    2.30
   5  11   0  237.08    3.30
   9  15   0   26.90    4.90
  12  17   0    0.40    6.20
   2 -14  -1  212.08    2.60
   7  13  -1   35.60    4.30
   2   5  -2  411.86    2.80
  13  17  -2   -0.90    7.70
   1   1  -3  245.98    3.10
   6  11  -3  291.77    4.70
   7  12  -3    2.60    4.50
   8  13  -3   24.40    5.00
   9  14  -3   30.10    5.80
   1  -1  -4  585.14    3.40
   2   3  -4   65.89    2.50
   5   9  -4  206.18    4.40
  11  15  -4  104.79    7.40
  14  17  -4    9.10   10.50
   7  11  -5   43.40    5.40
   8  12  -5  108.89    5.90
   9  13  -5   13.60    6.40
  13  16  -5    6.30   10.20
   3 -12  -6   32.30    2.10
   6   9  -6   38.70    5.20
  11  14  -6   85.29    8.30
  14  16  -6   14.40   10.00
   4 -13  -7   30.10    2.40
   6   8  -7  242.58    6.10
  12  14  -7   66.29    9.70
  15  16  -7   46.60   13.10
   3  -1  -8  278.57    5.10
   4   3  -8   19.10    5.50
   5   5  -8   39.50    4.00
   6   7  -8   51.19    5.90
   9  11  -8   84.79    7.60
  13  14  -8   54.99   10.70
   7 -16  -9   37.20    4.30
   4  -9  -9    4.70    3.70
   9  10  -9   27.60    8.10
  10  11  -9    9.60    9.00
  14  14  -9   17.50   12.10
   5 -10 -10   95.99    4.30
   5   1 -10   25.00    4.20
   6   4 -10   30.50    6.10
   7   6 -10  291.37    7.60
   9   9 -10   27.90    7.50
  10  10 -10   94.39    9.50
  11  11 -10   62.29    9.80
  14  13 -10   26.40   12.00
   7 -13 -11   72.19    5.80
   5  -6 -11  305.97    5.70
   5  -5 -11  290.37    6.00
   5  -4 -11   95.99    5.70
   5  -3 -11  297.17    6.30
   5  -2 -11  280.67    6.40
   6   2 -11  339.27    7.30
   7   4 -11   26.10    5.20
   8   6 -11   70.19    7.30
  11  10 -11    3.40    9.40
  14  12 -11   15.00   11.60
  15  13 -11    0.70   13.80
  10 -16 -12    6.30    8.00
   8 -13 -12   44.90    7.20
   7 -11 -12    4.10    6.70
   6  -7 -12    7.00    6.10
   6  -6 -12   39.70    5.90
   6  -5 -12   30.50    4.60
   6  -4 -12   44.90    4.80
   6  -3 -12   22.10    4.80
   6  -2 -12   61.69    6.90
   7   2 -12  186.78    7.70
   8   4 -12  189.48    6.40
   9   6 -12   34.80    9.20
  14  11 -12   15.70   12.50
  15  12 -12   19.80   13.70
   7  -7 -13    8.70    6.90
   7  -6 -13   26.20    7.10
   7  -5 -13   84.39    5.50
   7  -4 -13   30.20    5.40
   7  -3 -13   66.69    5.60
   7  -2 -13   46.00    7.50
   8   2 -13   19.20    8.00
   9   4 -13   57.69    8.50
  10   6 -13   48.10    9.20
  11   7 -13   -1.20   10.30
  12   8 -13   25.10   10.90
  13   9 -13   73.29   12.50
  14  10 -13   11.00   14.10
  11 -14 -14   28.40   10.00
  10 -12 -14   28.80    9.10
   9 -10 -14   43.00    8.50
   8  -6 -14   38.30    8.10
   8  -5 -14  104.69    8.60
   8  -4 -14  101.19    8.70
   8  -3 -14   74.89    8.60
   8  -2 -14   46.00    7.90
   9   1 -14   54.99    7.00
  10   4 -14  126.39    9.60
  11   5 -14  219.08    8.20
  15   9 -14   71.49   11.80
  11 -11 -15    1.60    9.40
  10  -9 -15    4.10    9.60
  10   0 -15  179.58    8.00
  10   1 -15   95.19    9.90
  11   3 -15   17.10   11.50
  12   4 -15    5.40    8.70
  13   6 -15   36.50   13.40
  14   7 -15   46.80   15.10
  15   8 -15   36.80   15.00
  12 -10 -16    8.10   12.20
  11  -8 -16    3.80   10.40
  11  -7 -16    4.70   11.50
  11  -6 -16    5.80    8.60
  11  -3 -16    6.60    8.60
  11  -2 -16   50.59   11.00
  11  -1 -16    0.10   12.10
  12   1 -16   23.60    9.10
  12   2 -16   45.20   12.20
  13   3 -16    6.60    9.90
  14   5 -16    8.90   14.80
  15   6 -16   19.90   16.50
  13  -7 -17   12.50   10.20
  13  -1 -17   11.40   13.50
  13   0 -17    3.80   14.30
  14   1 -17    0.10   11.90
  14   2 -17   32.30   15.70
   7  -1  21    2.80   14.70
   7   0  21    2.00   15.50
   6  -8  20   -7.10   15.70
   6  -7  20   -5.30   14.80
   6  -1  20   22.70   13.50
   6   0  20    8.10   12.40
   7   3  20   14.40   13.00
   8   5  20   55.99   12.70
   5  -8  19  125.69   10.50
   5  -7  19   39.90   13.90
   5  -6  19  120.79   12.60
   5  -2  19   38.10   12.20
   5  -1  19   18.40   12.80
   5   0  19    1.50    8.90
   6   3  19    8.40   10.70
   7   5  19    4.70   11.40
   5 -11  18   -0.80   11.60
   5 -10  18   21.30   13.40
   4  -7  18   43.10    8.80
   4  -6  18   18.90   11.20
   4  -5  18  133.49   11.90
   4  -4  18    6.50   11.50
   4  -3  18   56.99   11.10
   4  -2  18   44.60   10.40
   5   2  18    8.20    9.80
   6   5  18    8.20    7.50
   8   8  18   45.90   10.20
   9   9  18   40.90   11.20
   5 -12  17   24.40   14.00
   4 -10  17   41.80    9.10
   4  -9  17   28.40   11.50
   4   1  17   16.40    9.70
   5   4  17   71.09    9.20
   6   6  17   96.99    9.40
   8   9  17    6.60    9.20
   5 -14  16   38.20   13.90
   4 -12  16   24.60    9.60
   3  -8  16  116.69   10.50
   3  -1  16   52.09    8.10
   3   0  16   -1.80    8.40
   4   3  16   10.40    7.80
   8  10  16   36.30    7.60
   9  11  16    6.90    8.50
  10  12  16   12.30    9.20
   5 -15  15   83.09   14.60
   4 -13  15    4.90   12.60
   3 -10  15   95.69   10.70
   2  -6  15  132.59    6.80
   2  -5  15   82.79    6.40
   2  -4  15  133.19    8.60
   2  -3  15   93.19    6.00
   3   2  15   16.10    7.80
   4   5  15   30.60    6.70
   5   7  15   76.99    6.60
   5 -16  14   17.30   14.00
   4 -14  14   15.10   12.40
   3 -12  14   25.40   10.50
   2  -9  14   59.69    7.10
   2  -8  14   38.20    9.50
   2   0  14  262.17    7.70
   3   4  14   30.00    5.20
   4   6  14   79.59    6.40
   5 -17  13   48.20   10.20
   4 -15  13    6.90   12.00
   3 -13  13   50.49   10.90
   2 -10  13   84.69    8.90
   1  -5  13  600.34    6.90
   1  -4  13   64.19    5.50
   2   2  13   41.10    6.20
   3   5  13   85.19    6.00
   4   7  13   17.00    5.40
   6  10  13   39.00    5.10
   7  11  13   13.90    5.70
   4 -16  12  132.09   11.80
   3 -14  12   36.10    9.70
   2 -12  12   23.60    6.80
   1  -8  12   37.80    5.50
   1  -7  12   41.00    7.30
   1  -1  12   29.10    6.20
   1   0  12    1.70    4.20
   3   6  12  228.48    5.20
   5 -18  11   34.50   11.90
   3 -15  11  106.39    9.30
   1  -9  11    4.40    7.20
   1   1  11  171.18    5.60
   6  11  11   98.59    4.30
   9  14  11   30.00    4.30
   4 -17  10   79.29   10.40
   0  -5  10  164.78    4.60
   0  -4  10  134.79    4.50
   2   5  10   15.90    3.90
   5 -19   9   19.30   10.70
   3 -16   9  107.79    9.30
   2 -14   9   74.69    7.90
   0  -7   9    7.80    5.30
   0  -6   9   -2.70    5.70
   0  -2   9   -0.60    5.20
   0  -1   9   -2.70    3.50
   1   3   9  127.69    4.10
   1 -12   8  293.47    7.10
   0  -8   8  159.58    5.90
   0   0   8 1221.38    6.10
   5  11   8    0.70    2.40
   0  -9   7   -2.90    5.00
   0   1   7    0.00    2.70
   3 -17   5    8.00    6.50
   2 -15   5   33.30    5.00
  11  17   5   19.40    3.10
   3 -17   4  119.89    5.60
   2 -15   4    0.60    5.50
   1 -13   4   86.69    4.30
   2   7   4   41.10    1.00
   3 -17   3  132.49    5.00
   2 -15   3   56.29    4.60
   1 -13   3  307.37    4.40
  11  17   3    1.60    4.40
   2 -15   2   16.20    3.80
   4 -18   1   36.00    4.60
   0  -9   1    0.80    1.90
  13  18   1   52.99    7.00
   0  -8   0   13.60    1.70
   6 -20  -1    3.80    4.40
   6  12  -1   98.39    3.60
   8  14  -1  119.29    4.40
  12  17  -1   38.70    7.70
  14  18  -1   37.80    8.00
   4 -17  -2   25.10    2.80
   4   9  -2  123.69    3.10
  11  16  -2  141.19    6.60
   5  10  -3  560.94    4.60
  10  15  -3   74.39    6.50
  13  17  -3   39.90    8.10
   3   6  -4  995.10    5.20
  12  16  -4   25.10    8.00
   2   2  -5   76.29    2.70
   3   5  -5  116.99    4.40
   4   7  -5   27.90    4.20
   6  10  -5  299.47    5.50
  10  14  -5   17.80    7.10
   2   0  -6  129.49    2.80
   4   6  -6   44.70    4.80
  12  15  -6   36.60    8.90
   3   2  -7   93.79    3.40
   4   5  -7  209.38    5.40
   5   7  -7   26.90    5.20
   8  11  -7   36.90    7.00
   9  12  -7   35.30    7.20
  10  13  -7    5.00    7.30
  13  15  -7   -2.10   10.10
   5 -14  -8    9.70    3.20
   3  -8  -8   48.70    3.30
   3   0  -8   -2.80    4.80
   7   9  -8   92.89    6.80
   8  10  -8   22.50    7.00
  10  12  -8   38.00    6.00
  11  13  -8   80.69    9.30
  14  15  -8   26.30   12.00
   4   1  -9  693.23    5.30
   5   4  -9  146.39    4.50
   6   6  -9   14.40    4.60
   7   8  -9  184.28    7.00
   8   9  -9   48.20    5.50
  11  12  -9   43.90    7.00
  12  13  -9   75.19   10.60
  15  15  -9    4.90   12.00
   7 -15 -10    6.90    4.80
   6 -13 -10   32.10    4.10
   4  -6 -10  102.09    4.80
   4  -5 -10  213.28    4.90
   4  -4 -10  110.19    4.70
   4  -3 -10  416.76    5.80
   4  -2 -10  105.09    5.30
   5   2 -10  320.47    5.10
   6   5 -10   11.80    6.30
   8   8 -10   17.50    7.80
  12  12 -10   77.69   10.00
  13  13 -10    5.90   11.10
  15  14 -10   35.60   12.90
   8 -15 -11   20.60    6.00
   6 -11 -11   92.69    5.10
   5  -8 -11  335.57    6.20
   5  -7 -11  185.58    5.60
   5  -1 -11    1.00    5.80
   6   3 -11  347.67    7.40
   7   5 -11   97.59    7.50
   9   8 -11  105.69    8.40
  10   9 -11   17.50    6.90
  12  11 -11   13.40    8.40
  13  12 -11   22.00   12.30
   9 -15 -12   23.40    7.50
   6  -8 -12   40.50    5.90
   6  -1 -12  113.79    5.40
   6   0 -12   -0.90    7.40
   7   3 -12    4.40    7.40
   8   5 -12   40.60    8.10
  10   8 -12   -0.80    9.70
  11   9 -12   68.19   10.30
  12  10 -12   21.50   12.30
  13  11 -12   17.20   13.00
   9 -13 -13   31.20    7.30
   8 -11 -13   11.20    7.10
   7  -8 -13   43.30    6.80
   7  -1 -13   47.30    5.60
   7   0 -13   -1.50    7.70
   8   3 -13  246.88    8.90
   9   5 -13  116.29    9.30
  12   9 -13   15.50   11.30
  15  11 -13   13.50   14.40
  10 -13 -14   67.69    9.40
   9 -11 -14    6.50    8.10
   8  -8 -14  104.99    8.80
   8  -7 -14   25.80    7.50
   8  -1 -14   57.29    8.10
   8   0 -14  202.98    8.90
   9   2 -14   88.59    7.10
   9   3 -14   44.50    9.10
  11   6 -14    1.00   11.20
  12   7 -14   16.20    8.60
  13   8 -14   54.09   10.20
  14   9 -14   29.50   13.90
  15  10 -14    2.00   16.00
  11 -12 -15   27.80   10.30
  10 -10 -15   10.60    9.90
   9  -7 -15   30.30    9.50
   9  -6 -15  100.99    9.30
   9  -5 -15   77.79    7.10
   9  -4 -15  177.18    7.40
   9  -3 -15   24.80    7.10
   9  -2 -15   32.30    9.80
   9  -1 -15   -7.10    9.70
  10   2 -15  138.09   10.50
  11   4 -15   -3.10   11.40
  12   5 -15   41.40    8.90
  11  -9 -16    6.30   11.40
  10  -5 -16    9.30    9.40
  10  -4 -16   59.59    9.90
  10  -3 -16   15.60   10.00
  11   0 -16    0.20    8.80
  11   1 -16    5.00   11.90
  12   3 -16   25.80   12.60
  13   4 -16    6.60   10.10
  14   6 -16   15.60   13.80
  12  -7 -17   10.30   12.70
  12  -6 -17    4.50   12.90
  12  -5 -17   15.10   12.20
  12  -4 -17   12.30    9.70
  12  -3 -17   17.10   11.90
  12  -2 -17    0.90   13.40
  12  -1 -17   26.50   13.90
  13   1 -17   -2.00   13.90
  13   2 -17   40.80   13.80
  14   3 -17   36.30   14.80
   7  -3  21    1.30   14.80
   7  -2  21   24.90   11.90
   6  -6  20    3.70   11.50
   6  -5  20    4.70   14.30
   6  -4  20   17.20   13.90
   6  -3  20   -1.50   13.40
   6  -2  20    8.60   10.10
   7   2  20   18.40   12.40
   8   4  20   19.50   13.00
   6 -10  19    7.20   12.10
   6  -9  19    5.80   13.90
   5  -5  19    1.20    9.60
   5  -4  19    9.60    9.30
   5  -3  19   25.70    9.80
   6   1  19   64.49   11.20
   6   2  19   43.00    8.60
   7   4  19    2.70   11.70
   8   6  19    1.40   12.10
   6 -12  18    9.30   15.90
   5  -9  18   24.60   13.60
   5   1  18   27.60   10.50
   6   4  18   22.70   10.70
   7   6  18    0.30   10.00
   5 -11  17   21.10   14.10
   4  -8  17    5.60   11.70
   4  -7  17   54.49   10.60
   4  -1  17   23.10    9.40
   4   0  17   68.79   10.00
   5   3  17   58.59    8.90
   7   7  17   83.59   10.30
   9  10  17   29.50    8.40
  10  11  17   15.70    9.40
   5 -13  16   42.60   14.40
   4 -11  16    9.10    9.30
   4 -10  16   13.50   10.90
   3  -7  16   67.29    7.90
   3  -6  16   94.89    9.50
   3  -5  16   67.19    9.70
   3  -4  16   30.40    9.20
   3  -3  16   83.79    9.50
   3  -2  16   57.89    8.40
   5   5  16   13.10    8.20
   6   7  16    5.50    7.90
   5 -14  15    9.60   12.70
   4 -12  15   13.90   12.40
   3  -9  15   32.40   10.20
   3   1  15    7.10    7.70
   4   4  15   24.90    7.60
   6   8  15   47.40    7.10
   5 -15  14   56.49   11.70
   3 -11  14   -7.60   10.60
   2  -7  14   -0.90    8.10
   2  -6  14   65.29    8.60
   2  -5  14   23.90    7.90
   2  -3  14   15.80    7.00
   2  -2  14  113.39    7.40
   2  -1  14   65.89    7.10
   3   3  14   36.90    7.10
   6   9  14   43.20    6.30
  11  14  14   34.20    7.00
   5 -16  13   29.10   12.00
   3 -12  13   18.90    9.50
   2  -9  13   -4.90    8.60
   2   1  13  816.72    7.90
   8  12  13   54.39    5.90
   9  13  13   33.00    5.60
   5 -17  12   16.10   12.10
   2 -11  12   11.50    6.00
   1  -6  12  138.79    5.50
   1  -5  12  283.97    7.40
   1  -4  12  125.09    6.60
   1  -3  12  106.29    6.70
   1  -2  12  153.08    5.00
   2   3  12  231.68    5.60
   5   9  12   72.99    4.80
  11  15  12   62.69    5.40
   4 -16  11   65.39   10.80
   3 -14  11   49.60    9.40
   2 -12  11   82.49    7.90
   1  -8  11   59.39    7.30
   1   0  11    2.30    5.50
   2   4  11  201.58    4.90
   4   8  11    5.60    4.60
   7  12  11   30.20    4.40
   8  13  11   71.49    4.50
   5 -18  10   23.70   11.00
   3 -15  10   26.10    8.30
   2 -13  10   20.50    5.70
   1 -10  10   49.30    5.30
   1   2  10   68.39    3.40
   3   7  10  334.47    4.40
   4 -17   9   13.00    9.40
   1 -11   9  204.58    5.40
   0  -5   9    6.70    3.80
   0  -4   9    3.00    5.20
   0  -3   9   -0.20    3.80
   3 -16   8   -1.60    7.60
   2 -14   8   32.10    7.10
   0  -7   8  358.56    5.80
   0  -1   8  154.08    5.00
   2   6   8   11.10    2.80
   3   8   8   49.50    2.60
   5 -19   7   73.69    8.70
   1 -12   7  180.98    6.10
   0  -8   7   -1.90    4.80
   0   0   7   -1.00    4.00
   1   4   7  152.88    3.10
   4 -18   6   39.50    7.40
   1 -12   6  170.68    5.10
   0  -9   6  378.06    4.10
   0   1   6  758.72    3.70
   4  10   6  447.86    2.00
   4 -18   5   32.40    7.30
   0  -9   5    0.30    4.00
   4 -18   2   21.10    5.60
   0  -9   2   45.50    2.70
  11  17   2   20.70    4.80
   1 -12   1  134.09    3.30
   5 -19   0   26.70    4.40
   3 -16   0   -1.00    3.60
   1   4   0  478.25    1.80
  10  16   0  115.19    5.00
  13  18   0   13.80    7.50
   7 -21  -1    6.90    5.00
   2   6  -1  179.38    2.20
   3   8  -1  878.21    3.70
   5  11  -1  725.53    4.60
   9  15  -1   55.19    4.80
   7  13  -2   84.59    4.70
  12  17  -2    9.10    7.90
  14  18  -2   13.00    8.80
   3   7  -3  114.89    3.10
  11  16  -3   10.90    7.50
   1  -8  -4  194.88    1.30
   1   0  -4    0.10    3.10
   4   8  -4   32.10    3.90
   6  11  -4  212.58    4.70
   7  12  -4   70.59    4.90
   8  13  -4   55.09    5.50
   9  14  -4   24.00    6.30
   5   9  -5   51.59    4.50
  11  15  -5   55.79    7.10
  14  17  -5   38.40   10.50
   2  -9  -6   95.29    2.10
   2   1  -6  131.39    4.20
   3   4  -6  189.18    3.60
   5   8  -6   45.50    3.60
   7  11  -6    7.60    5.40
   8  12  -6   44.50    6.30
   9  13  -6   29.00    6.90
  13  16  -6   19.60   10.00
   2  -6  -7  133.99    2.90
   2  -5  -7  596.44    4.00
   2  -4  -7  530.55    3.40
   2  -3  -7  275.57    4.00
   2  -2  -7  613.94    4.90
   7  10  -7   51.79    4.40
  11  14  -7   19.40    8.90
  14  16  -7    5.40   11.50
   4 -12  -8   12.30    3.30
   3  -9  -8   82.89    3.50
   3   1  -8  303.57    5.40
   4   4  -8  302.17    5.90
   5   6  -8    3.80    3.80
   6   8  -8   20.30    6.10
  12  14  -8   -4.40    9.50
   4 -10  -9    8.90    3.30
   4   2  -9  154.28    4.30
   5   5  -9  150.98    5.80
  13  14  -9   13.10   11.40
   5 -11 -10   18.30    4.20
   4  -7 -10   41.30    4.40
   4  -1 -10  563.24    6.20
   5   3 -10   99.49    6.70
   7   7 -10  336.67    7.60
  10  11 -10   18.70    8.80
  14  14 -10   19.40   12.90
   5   0 -11   -2.30    4.40
   8   7 -11    0.20    5.60
  14  13 -11   -6.90   14.00
   7 -12 -12   49.20    6.30
   6  -9 -12   46.20    5.60
   6   1 -12  105.29    7.30
   7   4 -12  194.38    8.20
   8   6 -12  169.38    8.30
   9   7 -12    0.60    6.60
  14  12 -12    7.40   12.90
  10 -15 -13    5.40    7.80
   8 -12 -13   48.70    6.60
   7  -9 -13   22.50    7.00
   7   1 -13   38.40    7.10
   8   4 -13   22.30    8.50
  10   7 -13   42.20    9.60
  11   8 -13   20.40    7.70
  13  10 -13   60.79    9.70
  14  11 -13   -4.00   14.60
   8  -9 -14    0.40    7.80
   8   1 -14   59.69    8.80
  10   5 -14  111.29    7.70
  11   7 -14   79.69   11.00
  12   8 -14   43.20   12.60
  13   9 -14    6.30   14.60
  14  10 -14    7.20   13.70
  11 -13 -15   25.80    9.50
  10 -11 -15    4.30    9.70
   9  -8 -15   17.10    9.50
   9   0 -15    1.10    9.10
   9   1 -15    4.30    9.30
  10   3 -15   62.69   10.30
  11   5 -15   86.59   11.90
  12   6 -15   -0.10   11.20
  13   7 -15    8.10   10.20
  14   8 -15   24.80   12.00
  11 -10 -16   74.39   11.90
  10  -7 -16   22.40   10.80
  10  -6 -16   19.50   10.40
  10  -2 -16   18.40    7.90
  10  -1 -16   35.70   11.70
  11   2 -16   55.89   12.10
  12   4 -16  101.49   13.20
  13   5 -16   20.60   10.10
  12  -9 -17   52.79   13.20
  12  -8 -17    3.50   11.60
  11  -5 -17   -7.60   11.80
  11  -4 -17   29.10   11.30
  11  -3 -17   28.40   11.90
  12   0 -17   23.70   10.10
  12   1 -17   31.50   13.90
  13   3 -17   32.40   14.20
  14   4 -17   48.70   14.80
  13  -4 -18   18.30   15.40
  13  -3 -18    3.10   15.00
  13  -2 -18   16.40   15.30
  13  -1 -18   10.00   14.10
   7  -7  20   12.10   15.10
   7  -1  20    3.30   13.20
   7   0  20   -3.90   14.00
   7   1  20   -0.50   10.10
   8   3  20   -3.70   13.70
   9   5  20    9.60   13.50
   6  -8  19   12.20   13.60
   6  -7  19   90.89   14.40
   6  -1  19   73.39   11.90
   6   0  19  175.08   12.90
   7   3  19    3.00   12.10
   8   5  19   25.60   10.80
   9   7  19   24.50   12.20
   6 -11  18    1.70   14.80
   5  -8  18   35.40    9.20
   5  -7  18   35.60   12.60
   5  -6  18   10.00   11.80
   5  -2  18    9.70   10.70
   5  -1  18   29.20   11.50
   5   0  18   -4.40    7.90
   6   3  18   19.50   10.00
   7   5  18  110.89   10.80
   8   7  18   47.30   10.40
   6 -13  17   34.20   11.60
   5 -10  17   30.30   13.70
   4  -6  17   -1.00    7.60
   4  -5  17   57.19   10.40
   4  -4  17   53.69   10.20
   4  -3  17   11.00   10.40
   4  -2  17   40.30    9.40
   5   2  17   38.70    9.00
   6   5  17   66.69    9.80
   8   8  17   15.60   10.40
   6 -14  16   54.09   15.10
   5 -12  16    5.70   14.20
   4  -9  16   29.30   11.30
   4   1  16   79.59    8.60
   4   2  16  103.49    6.60
   5   4  16    3.70    7.50
   7   8  16  152.28    8.20
   6 -15  15    3.50   13.20
   4 -11  15   54.69   12.10
   3  -8  15  132.59    7.40
   3  -7  15   76.49    9.70
   3  -1  15  -11.90    7.40
   3   0  15   -2.50    7.80
   5   6  15  106.29    6.80
   7   9  15   43.40    7.00
  11  13  15   24.80    8.20
   6 -16  14   -9.80   13.50
   4 -13  14   39.40    8.70
   3 -10  14   14.40    9.90
   2  -4  14   34.70    5.70
   3   2  14   19.80    7.10
   4   5  14  123.79    6.70
   5   7  14   64.29    6.40
   7  10  14   31.30    6.20
   8  11  14    8.20    6.70
   9  12  14   56.79    7.40
  10  13  14   76.19    7.10
   6 -17  13    3.30   13.80
   4 -14  13   40.30   10.40
   2  -8  13  154.28    7.90
   2  -7  13   35.50    7.40
   2   0  13   66.69    6.70
   3   4  13   37.10    5.60
   4   6  13   34.00    5.60
   5   8  13  186.48    5.80
   6 -18  12   21.90   12.10
   4 -15  12   73.29    7.70
   3 -13  12   67.09    7.10
   2 -10  12   90.29    5.90
   2   2  12   38.30    5.80
   3   5  12    5.30    5.10
   4   7  12   27.20    4.90
   6  10  12   14.30    5.30
   5 -17  11   65.29   11.40
   2 -11  11   48.60    8.00
   1  -7  11   28.20    5.20
   1  -6  11  208.08    6.60
   1  -2  11   29.60    5.50
   1  -1  11  167.98    5.70
   3   6  11   29.30    4.40
  12  16  11   13.90    4.60
   6 -19  10    3.60   12.20
   4 -16  10  153.78   10.30
   2 -12  10   15.60    7.80
   1  -9  10   49.00    5.10
   1   1  10   11.10    4.70
   5  10  10  108.59    3.60
  10  15  10    5.80    3.80
   5 -18   9  179.08   10.60
   3 -15   9   41.80    8.20
   2 -13   9   19.70    5.20
   1 -10   9   35.20    6.10
   1   2   9  779.52    5.40
   2   5   9  146.79    3.60
   4   9   9    7.40    3.40
   4 -17   8   20.10    8.60
   1 -11   8  202.08    4.60
   0  -6   8  628.84    5.10
   0  -5   8   33.30    5.30
   0  -4   8 1393.46    7.20
   0  -3   8   29.20    5.20
   0  -2   8 1126.59    5.40
   1   3   8   77.69    3.70
   6  12   8   50.69    2.60
   8  14   8   21.10    2.50
   6 -20   7   14.90   10.00
   2 -14   7   38.80    5.90
   1 -11   7  250.07    5.50
   0  -7   7    4.70    4.60
   0  -1   7    5.20    4.10
   5 -19   6   17.50    8.20
   0  -8   6  470.45    5.30
   5 -19   5   13.10    7.90
   0   1   5   -3.40    2.00
   4 -18   4   96.79    6.20
   0   1   4  582.84    3.20
   4 -18   3   58.79    5.30
   7  14   3   19.90    2.60
   1 -12   2  202.58    4.20
   0   1   2 8413.86    5.30
   2   7   2   64.19    0.80
   5 -19   1   90.89    5.20
   0  -8   1    1.10    2.20
  11  17   1   -1.20    5.10
   6 -20   0    7.20    5.30
   2 -14   0  183.68    3.10
   4  10   0    0.30    2.00
   1 -11  -1   17.40    1.70
   0  -6  -1    1.00    1.00
  10  16  -1   65.89    6.00
  13  18  -1   53.79    8.00
   2 -13  -2   49.30    1.90
   6  12  -2   76.09    3.90
   8  14  -2   25.20    4.90
   9  15  -2    9.40    6.00
   2   5  -3  327.27    3.30
  14  18  -3   38.70    9.90
   2   4  -4  414.96    3.30
  10  15  -4   33.70    6.90
  13  17  -4    9.90    8.90
   1  -5  -5   76.69    2.00
   1  -4  -5  218.78    2.50
   1  -3  -5   18.40    2.40
   2   3  -5  670.63    4.60
  12  16  -5   24.60    8.90
   6  10  -6  129.39    5.40
  10  14  -6   88.89    7.10
  11  15  -6   25.80    7.70
   6 -17  -7   11.60    2.30
   3 -11  -7    7.50    2.40
   2  -7  -7  309.77    3.40
   2  -1  -7  294.67    4.50
   3   3  -7   29.00    3.40
   6   9  -7  225.68    4.60
  12  15  -7   66.99    9.60
   6 -16  -8   45.70    3.10
   8  11  -8  110.49    7.60
   9  12  -8   15.90    7.80
  10  13  -8  220.98    8.30
  13  15  -8   -3.40   10.20
   6 -15  -9  106.89    4.30
   5 -13  -9  199.08    3.90
   3  -6  -9  216.98    4.20
   3  -5  -9    9.40    3.70
   3  -4  -9   23.60    2.90
   3  -3  -9  185.38    3.60
   3  -2  -9   89.59    4.70
   4   3  -9  164.28    6.00
   6   7  -9  110.59    4.70
   8  10  -9    4.70    7.90
   9  11  -9   42.80    8.10
  10  12  -9   27.70    8.40
  11  13  -9   36.70   10.20
  14  15  -9    2.80   12.50
   9 -18 -10    9.30    5.20
   4  -8 -10  117.29    4.40
   4   0 -10  129.59    4.10
   5   4 -10   72.79    6.30
   6   6 -10   15.00    6.70
   8   9 -10    7.80    7.90
   9  10 -10   72.89    6.50
  11  12 -10   10.30    7.10
  12  13 -10   16.20   11.20
   9 -17 -11   50.29    7.00
   7 -14 -11   74.59    5.60
   6 -12 -11    4.30    4.60
   5  -9 -11  116.49    5.20
   5   1 -11    0.40    4.50
   6   4 -11  219.88    5.60
   7   6 -11   38.60    5.40
   8   8 -11    2.00    8.20
   9   9 -11   17.30    8.10
  10  10 -11   35.80    7.30
  11  11 -11   13.40    8.00
  12  12 -11   65.29   10.90
  13  13 -11   24.90   12.40
   8 -14 -12    1.70    6.30
   6 -10 -12   13.10    5.70
   5  -5 -12   33.00    5.90
   5  -4 -12  143.19    6.00
   5  -3 -12   47.90    6.20
   6   2 -12   61.89    7.20
   9   8 -12    4.30    9.20
  10   9 -12   62.59    9.70
  11  10 -12  109.99    8.30
  12  11 -12   11.20   11.40
  13  12 -12   26.50   13.10
   9 -14 -13   15.60    7.50
   7 -10 -13  112.79    6.90
   6  -6 -13   73.19    6.70
   6  -5 -13  191.58    7.30
   6  -4 -13  227.18    7.30
   6  -3 -13  113.59    7.40
   6  -2 -13  130.39    7.70
   7   2 -13   44.40    5.60
   8   5 -13    8.10    8.30
   9   6 -13   46.20    7.10
  10   8 -13   21.00    9.90
  11   9 -13   32.20   12.20
  12  10 -13  103.79   13.20
  13  11 -13   15.60   12.60
  10 -14 -14   17.70    9.40
   9 -12 -14   45.40    8.10
   8 -10 -14   60.19    7.80
   7  -6 -14   10.00    7.70
   7  -5 -14  114.49    8.20
   7  -4 -14   -0.70    7.60
   7  -3 -14   50.09    7.50
   7  -2 -14    7.20    8.00
   7  -1 -14   12.10    7.40
   8   2 -14   45.20    8.60
   9   4 -14  101.79    7.30
  10   6 -14   17.80    9.80
  10 -12 -15   17.40    8.80
   9 -10 -15  123.29   10.40
   9  -9 -15   16.50    6.90
   8  -6 -15    2.50    8.10
   8  -5 -15   13.10    8.70
   8  -4 -15   95.39    9.00
   8  -3 -15   22.70    8.90
   8  -2 -15   37.40    9.20
   9   2 -15   34.80   10.00
  10   4 -15  138.89   11.20
  11   6 -15    1.70   11.10
  12   7 -15   31.00   12.80
  13   8 -15   33.80   14.80
  14   9 -15   42.70   17.10
  11 -11 -16    8.10   10.80
  10  -9 -16   17.10   10.50
  10  -8 -16   12.00    7.70
  10   0 -16   26.50    8.00
  10   1 -16   42.40   11.20
  11   3 -16   -0.80    9.10
  12   5 -16   71.19   13.20
  13   6 -16    8.40   10.20
  14   7 -16    5.60   12.00
  11  -7 -17   34.80   12.00
  11  -6 -17   36.70   11.50
  11  -2 -17    1.90    9.40
  11  -1 -17   20.90   13.00
  11   0 -17   -4.40   11.80
  12   2 -17   -8.40   13.10
  13   4 -17   16.80   14.70
  14   5 -17   34.70   11.30
  12  -4 -18   37.90   13.70
  13   0 -18    8.30   14.50
  13   1 -18   15.50   15.40
   7  -6  20   46.80   12.50
   7  -5  20   30.60   14.60
   7  -4  20   38.90   15.60
   7  -3  20   21.50   15.00
   7  -2  20   18.30   13.60
   8   2  20   21.00   14.20
   9   4  20   21.40   12.90
   7  -9  19   52.29   14.70
   6  -6  19   36.20    9.90
   6  -5  19   81.09   12.50
   6  -4  19   14.30   12.40
   6  -3  19    2.90   12.30
   6  -2  19   37.50    9.40
   7   2  19   13.50   12.20
   9   6  19   35.60   11.50
   6 -10  18    8.50   10.70
   6  -9  18   19.90   13.80
   5  -5  18    0.80    8.60
   5  -4  18    6.10    8.50
   5  -3  18   31.50    8.40
   6   2  18    1.40   10.20
   8   6  18   12.90   10.10
   9   8  18   11.20    9.80
  10   9  18    1.70   10.90
   6 -12  17   36.20   11.00
   5  -9  17  125.89   11.70
   5  -8  17   56.09   11.20
   5   1  17   50.99    9.70
   6   4  17   -4.50    9.30
   7   6  17   14.30    9.40
   9   9  17    6.10    9.20
  10  10  17   54.59   10.70
   6 -13  16    2.20   15.00
   5 -11  16   61.19   12.80
   4  -8  16   39.10    7.70
   4  -7  16  102.59   10.40
   4   0  16  428.06    9.80
   6   6  16    2.80    7.90
   8   9  16   73.39    8.30
   9  10  16    1.80    8.60
  10  11  16   20.50    9.80
   5 -13  15   98.19    9.60
   4 -10  15  151.98   11.40
   3  -6  15   74.79    6.60
   3  -5  15  105.19    8.60
   3  -4  15   17.10    8.90
   3  -3  15   -0.50    8.20
   3  -2  15    9.50    5.90
   4   3  15   70.09    5.60
   5   5  15   37.90    6.70
   6   7  15   32.70    7.60
   8  10  15   12.60    7.20
   9  11  15   40.70    8.20
  10  12  15   12.70    8.30
   5 -14  14   19.30   12.60
   4 -12  14   12.60   10.80
   3  -9  14  157.38    7.60
   3  -8  14   20.80    9.00
   3   1  14   54.19    7.30
   5 -15  13   55.29   12.50
   4 -13  13   47.40   10.90
   3 -11  13  165.08    7.50
   2  -6  13  119.19    7.50
   2  -5  13   61.99    7.90
   2  -4  13  116.09    7.50
   2  -3  13  278.47    7.60
   2  -2  13   52.79    7.30
   2  -1  13  738.23    6.80
   3   3  13   50.49    6.20
   6   9  13   46.50    6.10
   5 -16  12   17.00   10.80
   4 -14  12   82.19   10.30
   3 -12  12   36.30    8.90
   2  -9  12   51.89    5.80
   2  -8  12   -1.40    7.00
   2   1  12   40.10    5.90
   7  11  12    5.00    5.00
  10  14  12   87.89    5.60
   6 -18  11   -2.10   12.20
   4 -15  11   38.40   10.00
   3 -13  11   14.00    9.30
   2 -10  11   66.39    7.70
   1  -5  11   84.79    4.80
   1  -4  11  312.37    5.40
   1  -3  11  258.77    5.30
   2   3  11   41.40    4.60
   5 -17  10   18.50    9.70
   3 -14  10  147.99    6.60
   2 -11  10   65.69    7.10
   1  -8  10  211.18    5.60
   1  -7  10  170.38    6.60
   1   0  10    1.90    4.90
   2   4  10  127.79    4.50
   6  11  10    8.20    3.70
   6 -19   9    9.30   11.20
   4 -16   9   47.90    8.80
   2 -12   9   81.49    7.40
   1  -9   9  145.19    6.50
   3   7   9   29.90    3.40
   3 -15   8  117.69    7.70
   2 -13   8   24.20    6.40
   1 -10   8  522.45    6.70
   7  13   8   38.20    2.40
   0  -6   7   -2.00    3.40
   0  -5   7    0.50    4.80
   0  -4   7    4.50    4.40
   0  -3   7    2.70    4.40
   0  -2   7   -6.20    4.40
   2   6   7  132.59    2.50
   3   8   7   49.80    2.50
   5  11   7   16.60    2.10
   6 -20   6   16.40    8.60
   1 -11   6  249.68    5.10
   0  -7   6  281.37    4.90
   0   0   6  605.34    3.40
   1   4   6  144.99    2.60
   7 -21   5    4.10    9.70
   6 -20   5   34.20    8.10
   3 -16   5   69.99    6.20
   0  -8   5    4.30    2.80
   6 -20   4    4.40    8.50
   5 -19   4   21.60    6.40
   3 -16   4    6.20    5.30
   2 -14   4   90.59    5.30
   7  14   4   22.00    1.80
   5 -19   3  216.48    6.70
   3 -16   3   89.79    5.50
   1 -12   3   64.89    3.90
   0   1   3    2.50    2.10
   6  13   3  222.28    2.30
   8  15   3  101.79    3.00
   5 -19   2   19.80    5.90
   3 -16   2  148.79    5.20
   0  -8   2  654.83    3.40
   6  13   2   16.40    2.40
   7  14   2   89.89    3.10
   8  15   2   98.49    3.70
   6 -20   1    3.50    5.60
   3 -16   1   53.89    4.00
   2 -14   1  211.48    3.80
   7 -21   0    8.40    5.80
   0  -7   0  404.46    2.10
  11  17   0  112.49    5.30
   4 -17  -1   78.99    3.70
   3 -15  -2   32.20    2.40
   1   3  -2   64.69    2.50
   5  11  -2   87.89    3.70
  10  16  -2   15.00    6.40
   6 -19  -3    4.80    3.20
   1   2  -3 1216.98    3.50
   4   9  -3  375.26    3.80
   7  13  -3   20.90    4.60
   8  14  -3   11.40    5.20
  12  17  -3    0.50    7.40
   5  10  -4  271.37    4.40
  11  16  -4    6.40    7.40
   1  -6  -5  143.09    2.10
   1  -2  -5  249.88    2.30
   3   6  -5    8.60    4.30
   4   8  -5  258.17    4.70
   6  11  -5   63.69    4.70
   7  12  -5  298.27    6.10
   8  13  -5  115.49    5.90
   9  14  -5   98.89    6.90
  10  15  -5   20.70    7.80
  13  17  -5   14.30    8.70
   2   2  -6  339.17    4.60
   3   5  -6  553.74    5.50
   4   7  -6    8.40    3.20
  12  16  -6   -3.70   10.20
  14  17  -6   14.00   11.30
   2   0  -7  543.75    5.00
   3   4  -7  428.96    5.40
   4   6  -7   32.00    3.60
   5   8  -7  187.68    5.80
   7  11  -7  115.29    6.50
   8  12  -7  133.59    7.10
   9  13  -7   48.20    7.50
  10  14  -7   56.29    8.20
  13  16  -7   11.40   10.90
   3   2  -8   50.39    3.80
   4   5  -8   22.20    5.40
   5   7  -8    5.50    5.70
   7  10  -8  127.09    7.20
  11  14  -8   33.80    9.70
  14  16  -8   25.60   12.30
   9 -19  -9   38.10    4.20
   8 -18  -9    7.40    4.20
   4 -11  -9   77.59    3.80
   3  -7  -9   39.00    3.90
   3  -1  -9   24.40    3.40
   3   0  -9    3.20    4.80
   5   6  -9  252.37    6.20
   7   9  -9  216.98    5.90
  12  14  -9   24.20    9.90
   8 -17 -10   32.30    4.90
   6 -14 -10   73.19    4.80
   5 -12 -10   42.80    4.40
   4  -9 -10   55.59    4.20
   4   1 -10  546.75    5.30
   7   8 -10   84.29    7.20
  13  14 -10   21.30   11.00
   8 -16 -11    5.50    5.90
   5 -10 -11   30.30    4.70
   4  -5 -11   44.40    4.90
   4  -4 -11    5.30    5.30
   4  -3 -11  231.78    5.90
   5   2 -11  247.18    5.40
   6   5 -11   78.89    7.20
   7   7 -11   58.29    7.80
  14  14 -11   56.79   14.70
   9 -16 -12   24.10    7.00
   7 -13 -12   42.20    6.50
   5  -7 -12    7.20    5.40
   5  -6 -12  101.99    6.00
   5  -2 -12   27.60    4.70
   5  -1 -12   65.09    6.80
   6   3 -12   22.40    7.30
   7   5 -12   52.59    5.70
   8   7 -12   76.79    8.80
  14  13 -12   19.90   15.40
   8 -13 -13  116.39    7.90
   7 -11 -13   16.90    7.20
   6  -8 -13   34.70    7.40
   6  -7 -13   44.40    6.70
   6  -1 -13   34.90    5.40
   6   0 -13  235.68    7.70
   7   3 -13   73.19    5.90
   9   7 -13   60.59    9.90
  14  12 -13    9.80   13.70
   9 -13 -14   30.90    8.60
   8 -11 -14    6.90    6.90
   7  -8 -14   58.59    8.00
   7  -7 -14   77.29    7.20
   7   0 -14   -3.60    8.10
   8   3 -14   89.99    7.00
   9   5 -14    4.90    7.20
  10   7 -14    7.30   10.60
  11   8 -14   11.10   11.10
  12   9 -14   16.00    9.90
  13  10 -14    8.10   13.50
  14  11 -14    4.30   15.70
   8  -8 -15   15.90    8.20
   8  -7 -15   -0.10    9.40
   8  -1 -15    9.30    6.80
   8   0 -15   10.70    9.10
   9   3 -15   37.60   10.00
  10   5 -15   13.30   11.10
  12   8 -15   -5.00   12.20
  13   9 -15  100.49   14.00
  10 -10 -16   51.59   10.80
   9  -7 -16   55.09    9.70
   9  -6 -16   30.20   10.30
   9  -5 -16   50.89    7.30
   9  -4 -16    1.10    7.20
   9  -3 -16   11.70    7.50
   9  -2 -16    5.60   10.00
   9  -1 -16   11.00   10.70
  10   2 -16   22.50    8.50
  11   4 -16  107.59    9.10
  12   6 -16    3.10   13.70
  13   7 -16   29.50   13.90
  14   8 -16    2.70   15.80
  11  -9 -17   38.10   12.50
  11  -8 -17    9.90    8.80
  10  -5 -17   57.79   11.10
  10  -4 -17   23.90   11.80
  10  -3 -17  124.19   12.30
  10  -2 -17   59.69   11.40
  11   1 -17   30.90   12.30
  12   3 -17    4.40   10.20
  13   5 -17   21.70   15.00
  14   6 -17   33.50   15.00
  12  -6 -18    2.70   13.20
  12  -5 -18    8.50   10.70
  12  -3 -18   59.29   10.40
  12  -2 -18   20.20   10.90
  12  -1 -18   -2.50   15.00
  12   0 -18    5.60   15.00
  13   2 -18    6.70   16.40
   8   0  20   45.40   14.40
   8   1  20   16.20   13.20
   9   3  20    8.30   13.20
   7  -8  19   28.00   13.60
   7  -7  19   72.69   13.60
   7   0  19   12.60   12.00
   7   1  19   13.80   11.40
   8   4  19   48.00    8.70
   7 -11  18   35.60   15.10
   6  -8  18   -6.80   12.40
   6  -7  18   31.20   13.00
   6   0  18    6.50   11.80
   6   1  18   36.50    7.90
   7   4  18   29.80    7.90
   9   7  18   48.70   10.00
   7 -13  17   26.60   12.20
   6 -11  17   -2.20   10.60
   6 -10  17   42.40   12.80
   5  -7  17  340.67   11.30
   5  -6  17   50.39   11.60
   5  -1  17   37.40   10.60
   5   0  17   -8.10    9.30
   6   3  17   35.80    8.80
   8   7  17   42.10    9.00
   7 -14  16    2.00   15.80
   6 -12  16   37.30   13.10
   5 -10  16   14.40   11.30
   4  -6  16   43.30    7.50
   4  -5  16   46.40    9.20
   4  -4  16   35.10    9.50
   4  -3  16   10.30    9.30
   4  -2  16  108.29    8.70
   4  -1  16   75.69    6.40
   5   3  16   13.00    7.70
   6   5  16   11.00    8.10
   7   7  16    8.60    8.40
   6 -14  15   40.30   12.80
   5 -12  15   12.70    9.20
   4  -9  15   14.60    9.50
   4   2  15   -2.70    7.30
   6 -15  14   -3.40   13.60
   5 -13  14    3.00   12.20
   4 -11  14   11.50   10.00
   3  -7  14  311.87    9.50
   3  -6  14   52.09    8.00
   3  -1  14   65.39    7.00
   3   0  14    5.00    7.40
   4   4  14  252.47    5.60
   5   6  14   20.20    6.60
   6   8  14    3.80    6.20
   6 -16  13   -1.80   13.20
   5 -14  13   53.19   11.00
   4 -12  13    8.60   10.10
   3 -10  13   -0.10    6.60
   3  -9  13  189.08    8.50
   3   2  13   24.70    5.80
   4   5  13   74.19    5.90
   5   7  13   84.79    6.30
   6 -17  12   21.20    9.20
   5 -15  12   36.70   10.30
   3 -11  12   63.09    8.70
   2  -7  12  129.49    7.70
   2   0  12   11.30    5.80
   3   4  12  278.47    5.80
   5   8  12   88.59    5.50
   8  12  12    8.90    5.50
   9  13  12   10.60    5.30
   5 -16  11   33.00   11.00
   3 -12  11  107.29    8.80
   2  -9  11  190.38    7.60
   2   2  11  446.36    5.80
   3   5  11   20.90    4.60
   5   9  11  110.89    4.10
   6 -18  10   13.20   11.40
   4 -15  10   71.49    9.30
   3 -13  10   92.49    8.50
   1  -6  10   78.19    5.90
   1  -5  10  152.68    6.30
   1  -4  10   49.20    5.70
   1  -3  10   86.39    5.60
   1  -2  10   67.09    5.70
   1  -1  10   12.10    3.80
   3   6  10   71.19    4.20
   4   8  10  106.99    3.80
   9  14  10    8.10    4.00
   3 -14   9   41.20    7.40
   1  -8   9   12.30    5.80
   1   1   9   14.30    4.30
  11  16   9    8.40    3.20
   4 -16   8   34.20    7.90
   2 -12   8   18.40    6.40
   1  -9   8   28.10    5.70
   1   2   8  247.28    4.50
   3 -15   7   43.90    6.80
   2 -13   7  100.59    6.20
   1 -10   7  168.68    5.60
   1   3   7  361.36    3.50
   0  -6   6   83.49    3.40
   0  -5   6 1938.81    6.90
   0  -2   6  266.17    4.20
   0  -1   6  753.62    3.80
   0  -7   5   -6.00    4.10
   0   0   5    4.70    2.50
   1   4   5  229.08    2.30
   7 -21   4   96.69    8.40
   8  15   4   83.19    2.30
  12  18   4    5.40    4.30
   7 -21   3   15.20    8.50
   6 -20   3   11.50    6.60
   2 -14   3  129.09    4.30
  12  18   3    1.90    4.60
   7 -21   2   16.30    7.50
   6 -20   2   19.60    6.90
   2 -14   2   76.89    3.70
  12  18   2   17.20    5.70
   7 -21   1    8.20    6.70
   6  13   1   85.19    2.90
   7  14   1  125.69    3.40
   8  15   1   58.59    3.90
  12  18   1    7.30    6.20
   1 -11   0   44.70    2.50
   4  10  -1   22.50    2.50
  11  17  -1    2.10    5.70
   5 -18  -2   39.00    3.50
   1 -10  -2  187.08    1.40
   2   6  -2  102.49    2.50
   3   8  -2  148.79    3.00
  13  18  -2    2.90    7.70
   6  12  -3  125.69    4.40
   9  15  -3  118.99    6.10
   1   1  -4  566.54    3.10
   3   7  -4   78.89    3.80
  12  17  -4   44.10    8.00
   2 -11  -5  131.69    1.30
   1  -1  -5  134.59    2.30
  11  16  -5   22.60    8.70
   5   9  -6   89.59    3.70
   8  13  -6   59.79    6.40
   2  -8  -7   18.30    2.70
   2   1  -7  320.57    4.60
   6  10  -7   39.90    5.70
  11  15  -7   41.80    9.10
   3 -10  -8  174.18    3.30
   3   3  -8  326.47    5.80
   6   9  -8   10.00    5.90
  12  15  -8   37.20    9.60
   3  -8  -9  557.14    4.60
   3   1  -9   27.50    5.10
   4   4  -9   92.79    4.30
   6   8  -9   62.49    5.10
   8  11  -9    3.70    7.40
   9  12  -9  146.69    8.60
  10  13  -9   42.90    8.90
  13  15  -9   63.59    8.70
   4   2 -10   89.89    4.40
   5   5 -10   49.20    6.40
   6   7 -10   20.30    7.20
   8  10 -10   40.40    8.30
   9  11 -10  139.49    9.20
  10  12 -10   91.09    9.00
  11  13 -10   15.80   10.20
  14  15 -10   45.20   12.50
   6 -13 -11   16.10    5.10
   4  -6 -11   37.50    5.00
   4  -2 -11   13.50    4.00
   4  -1 -11   41.30    5.70
   5   3 -11  298.07    5.20
   8   9 -11   20.20    8.30
   9  10 -11   88.09    9.10
  10  11 -11   52.89    7.30
  11  12 -11   31.80   10.00
  12  13 -11   17.40   12.40
   8 -15 -12   12.40    6.70
   6 -11 -12    5.20    5.30
   5  -8 -12   92.59    5.60
   5   0 -12    0.70    4.50
   5   1 -12   60.99    7.00
   6   4 -12   49.99    7.60
   7   6 -12  204.08    8.20
   9   9 -12   21.30    9.70
  10  10 -12   48.40    7.70
  11  11 -12   23.20    8.70
  12  12 -12    7.70   12.50
  13  13 -12    8.80   13.00
   9 -15 -13   41.10    7.30
   6   1 -13   44.60    5.40
   7   4 -13   33.60    7.90
   8   6 -13    9.60    9.10
  10   9 -13   28.50   11.40
  11  10 -13   -1.50   11.40
  12  11 -13   29.00   13.10
  13  12 -13   36.50   14.00
   7  -9 -14   90.59    7.70
   7   1 -14    8.40    6.30
   7   2 -14   12.90    8.20
   8   4 -14  105.49    6.90
   9   6 -14   91.79    9.50
  11   9 -14   59.89   12.10
  12  10 -14    5.00   13.70
  13  11 -14   31.40   13.90
  10 -13 -15    2.80    9.70
   9 -11 -15   46.30    9.50
   8  -9 -15   19.80    7.90
   8   1 -15    5.10    6.90
   8   2 -15   38.70    9.00
   9   4 -15  180.68   10.70
  10   6 -15   21.70   11.20
  11   7 -15   38.10    9.00
  14  10 -15   27.40   12.10
  10 -11 -16   16.30    9.60
   9  -8 -16   83.59   10.10
   9   0 -16   -2.20    7.90
   9   1 -16    2.70   10.90
  10   3 -16   13.00    8.40
  10   4 -16   78.89   11.10
  11   5 -16   11.70    9.30
  12   7 -16    8.30   12.90
  13   8 -16   28.30   16.10
  11 -10 -17   33.30   12.10
  10  -7 -17   17.40   11.60
  10  -6 -17    6.20   10.80
  10  -1 -17   84.39   11.80
  10   0 -17   50.39   12.60
  11   2 -17   -4.70    9.60
  11   3 -17   28.10   13.10
  12   4 -17    8.70   10.00
  12   5 -17   11.20   12.90
  13   6 -17    9.10   15.20
  11  -5 -18   42.70   13.80
  11  -4 -18   30.30   14.10
  11  -3 -18   24.00   13.50
  11  -2 -18   46.40   13.60
  12   1 -18   10.30   13.50
  12   2 -18   37.50   14.40
  13   3 -18    7.20   12.60
  13   4 -18   18.80   15.30
   8  -6  20   38.30   12.40
   8  -5  20   58.09   14.70
   8  -4  20   24.90   16.00
   8  -3  20    1.20   15.30
   8  -2  20   14.50   13.40
   8  -1  20    5.40   10.80
   9   2  20   -5.10   14.70
   8  -9  19   28.20   16.60
   7  -6  19   10.20   10.10
   7  -5  19   -4.10   14.00
   7  -4  19    1.10   14.20
   7  -3  19    9.60   14.10
   7  -2  19    7.60   13.30
   7  -1  19   10.30   11.80
   8   2  19   26.40   12.00
   8   3  19    9.50    9.30
   9   5  19   31.40   11.20
   7 -10  18   -1.10   11.60
   7  -9  18   51.39   14.10
   6  -6  18   12.30    8.80
   6  -5  18    7.40   11.40
   6  -4  18   15.90   11.80
   6  -3  18   12.90   12.10
   6  -2  18   -0.80   11.20
   6  -1  18   49.90    8.30
   7   2  18   81.19   10.40
   7   3  18   28.10    7.50
   8   5  18   65.89   10.90
  10   8  18   54.59   11.10
   7 -12  17    5.50   11.70
   6  -9  17   67.89   12.80
   5  -5  17   54.89    7.80
   5  -4  17   73.19    8.00
   5  -3  17   58.39    8.00
   5  -2  17   36.90    7.60
   6   2  17    9.10    9.50
   7   5  17    2.10    9.80
   9   8  17   12.30    8.90
   7 -13  16   29.30   13.80
   6 -11  16   22.90   12.50
   5  -9  16   24.80    8.50
   5  -8  16   26.30   11.40
   5   1  16   19.20    8.60
   5   2  16   21.00    8.50
   8   8  16    0.70    8.40
   7 -15  15   17.30   11.30
   6 -13  15   26.80   13.50
   5 -11  15   23.00   11.10
   4  -8  15    6.00    7.00
   4  -7  15   -2.00    9.30
   4   0  15   35.50    8.10
   4   1  15   12.60    5.60
   5   4  15    3.60    7.70
   6   6  15   91.59    7.70
   7   8  15   -5.70    7.30
   7 -16  14   88.19   13.90
   6 -14  14    3.40   11.70
   5 -12  14   48.70   10.80
   4 -10  14    6.20    9.60
   3  -5  14   51.19    6.00
   3  -4  14   29.40    7.90
   3  -3  14   31.20    7.60
   3  -2  14   16.70    5.50
   4   3  14   43.60    7.10
   7   9  14   96.19    6.70
   7 -17  13    2.80   10.60
   6 -15  13  102.59   11.50
   3  -8  13  144.79    8.40
   3   1  13   16.20    6.30
   7  10  13  112.99    5.50
   8  11  13   15.20    6.20
  10  13  13   16.90    6.50
  11  14  13   37.90    6.70
   6 -16  12   12.00   11.20
   4 -13  12   20.00    7.00
   3 -10  12  136.49    8.30
   2  -6  12   95.99    5.40
   2  -5  12   34.60    6.90
   2  -4  12   31.80    6.70
   2  -3  12  240.38    6.80
   2  -2  12   38.00    6.50
   2  -1  12   51.29    4.60
   3   3  12   18.60    5.30
   4   6  12   75.99    5.20
   7 -18  11   11.80   11.30
   6 -17  11   60.29   11.60
   4 -14  11   13.70    7.00
   2  -8  11    4.90    7.20
   2   1  11  137.69    5.60
   4   7  11   38.90    4.30
   6  10  11    6.40    4.70
   7 -19  10   35.10   11.50
   5 -16  10   84.79    9.90
   2 -10  10   89.89    5.40
   2   3  10    2.00    4.50
   7  12  10   32.20    3.70
   8  13  10   48.60    4.00
   6 -18   9   18.00    9.80
   5 -17   9   44.10    9.00
   4 -15   9   65.59    8.00
   2 -11   9   98.49    6.50
   1  -7   9   64.59    4.00
   1  -6   9   77.49    5.60
   1   0   9   -5.10    4.70
   2   4   9  102.99    3.90
   5  10   9   61.39    3.30
   3 -14   8   49.20    7.10
   1  -8   8  408.76    6.30
   2   5   8   72.79    3.20
   4   9   8  439.46    3.40
   7 -20   7   22.70   10.40
   5 -18   6   55.09    7.90
   1 -10   6  325.27    5.20
   0  -4   6  163.48    3.30
   0  -3   6 1137.99    4.70
   2   6   6   48.10    2.30
   4 -17   5    2.50    6.70
   0  -6   5    0.30    3.90
   0  -1   5   -2.30    3.50
   4 -17   4   54.19    5.90
   0  -7   4  482.75    3.50
   0   0   4 1223.28    4.20
   1 -11   3  131.59    4.30
   9  16   3   89.69    3.40
   3   9   2  319.97    1.50
   9  16   2   -4.40    3.90
   1 -11   1   12.10    2.80
   0  -7   1    5.30    2.30
   2   7   1    5.80    1.30
   9  16   1  117.89    4.80
   4 -17   0   42.20    4.00
   6  13   0   12.70    3.40
   7  14   0   -2.20    3.40
   8  15   0   20.40    4.20
  12  18   0    2.00    6.50
   1   4  -1  331.67    2.50
   4  10  -2  371.56    4.00
  11  17  -2   14.70    6.30
   8 -21  -3   14.30    4.20
   7 -20  -3    5.00    3.70
   5  11  -3  455.25    4.80
  10  16  -3   35.20    6.50
  13  18  -3   47.00    8.50
   2   5  -4   19.30    3.10
   4   9  -4  209.48    3.90
   6  12  -4   48.10    4.40
   7  13  -4   10.60    5.10
   8  14  -4   68.39    5.80
   9  15  -4   62.89    6.60
   6 -18  -5   32.90    2.20
   1  -7  -5  314.47    2.00
   1   0  -5    8.40    3.40
   2   4  -5  334.47    3.40
   5  10  -5  384.06    5.00
   2 -10  -6   11.20    1.90
   2   3  -6   18.50    4.20
   4   8  -6  148.39    4.70
   6  11  -6   36.60    5.60
   7  12  -6   51.49    5.60
   9  14  -6   46.40    6.80
  10  15  -6   94.09    7.90
  13  17  -6   11.60   10.20
   4 -14  -7   21.70    2.40
   4   7  -7  145.89    5.30
  12  16  -7   13.00   10.10
   4 -13  -8   16.20    3.00
   2  -5  -8   88.39    3.50
   2  -4  -8  185.98    3.10
   2  -3  -8  111.99    3.10
   2  -2  -8  107.49    4.40
   2  -1  -8  435.86    5.10
   4   6  -8  150.88    5.60
   5   8  -8  140.89    6.10
   7  11  -8   39.20    6.80
   8  12  -8   51.99    7.90
   9  13  -8   60.09    8.00
  10  14  -8   69.99    9.60
  13  16  -8   27.30   10.60
   7 -17  -9   20.90    3.90
   5   7  -9  982.80    8.00
   7  10  -9   55.29    7.50
  11  14  -9   37.30    9.90
  12  15  -9   15.40   10.30
   7 -16 -10   53.99    4.50
   4 -10 -10  145.09    4.00
   3  -5 -10  339.67    4.90
   3  -4 -10   44.20    4.60
   3  -3 -10  242.58    5.20
   3  -2 -10   95.99    5.00
   4   3 -10  451.45    6.90
   7   9 -10  111.79    7.30
  12  14 -10   10.10    8.50
  13  15 -10   23.80   11.30
   7 -15 -11   15.70    4.90
   5 -11 -11   71.99    4.70
   4  -7 -11   36.80    4.80
   4   0 -11  444.66    5.20
   4   1 -11   44.70    5.80
   5   4 -11   99.29    6.90
   6   6 -11   67.69    5.30
   7   8 -11  120.69    8.10
  13  14 -11   42.20   12.60
   5  -9 -12   60.59    5.00
   5   2 -12   28.10    7.10
   6   5 -12   33.80    7.30
   8   8 -12   23.40    6.20
   7 -12 -13   61.89    6.50
   6  -9 -13   46.50    6.30
   5  -4 -13   65.39    7.10
   5  -3 -13   66.69    6.90
   5  -2 -13   47.50    6.60
   6   2 -13  118.69    5.80
   7   5 -13   78.29    8.50
   8   7 -13   49.20    9.50
   9   8 -13   17.50    7.50
   8 -12 -14   26.50    7.40
   7 -10 -14   44.50    8.00
   6  -6 -14    2.70    6.80
   6  -5 -14   16.00    7.60
   6  -4 -14   18.40    7.70
   6  -3 -14   13.80    7.30
   6  -2 -14   30.10    7.80
   6  -1 -14    9.70    7.70
   7   3 -14   37.70    8.90
   8   5 -14  105.49    9.10
   9   7 -14    1.50    9.90
  10   8 -14    7.40    8.10
   9 -12 -15   83.99    8.70
   8 -10 -15   14.10    7.80
   7  -6 -15   78.19    8.10
   7  -5 -15    8.60    8.20
   7  -4 -15  110.29    8.10
   7  -3 -15    1.10    8.60
   7  -2 -15   75.59    9.20
   7  -1 -15   22.70    8.60
   8   3 -15   21.80    9.70
   9   5 -15   79.39   10.50
  11   8 -15   48.70   12.70
  12   9 -15   55.49   13.20
  13  10 -15    9.60   15.40
   9  -9 -16    6.10    9.90
   8  -6 -16   49.99    9.00
   8  -5 -16   53.19    9.80
   8  -4 -16  115.59    9.80
   8  -3 -16  115.39    9.90
   8  -2 -16  159.88   10.30
   8  -1 -16  107.59   10.50
   9   2 -16    8.30    7.80
  10   5 -16   13.90   11.20
  11   6 -16    7.90    9.60
  10  -9 -17   -4.00   10.90
  10  -8 -17   36.60   10.60
   9  -4 -17   34.50   10.20
   9  -3 -17  126.99   10.80
  10   1 -17   82.29    9.40
  10   2 -17   51.19   12.30
  11   4 -17   24.20   13.70
  12   6 -17    5.00   13.40
  13   7 -17   -7.60   16.90
  11  -7 -18    1.00   13.00
  11  -6 -18   -1.20   10.10
  11  -1 -18   10.80   10.30
  11   0 -18  -16.50   14.40
  11   1 -18   12.50   13.60
  12   3 -18   45.00   15.90
  13   5 -18   22.80   15.40
  12  -2 -19   32.80   15.70
   9   0  20   -5.20   14.50
   9   1  20    8.10   13.80
   8  -8  19    9.80   13.80
   8  -7  19    1.80   15.10
   8   1  19   22.80   12.60
   9   4  19   90.39   12.50
  10   6  19   17.90   11.60
   8 -11  18   47.80   12.60
   7  -8  18    7.40   12.50
   7  -7  18  145.79   12.80
   7   1  18    7.80   11.50
   8   4  18   -3.20   10.80
   9   6  18   16.50   11.10
   7 -11  17   12.20   11.40
   6  -8  17   65.69    8.90
   6  -7  17   12.10   12.00
   6   1  17  311.77   10.40
   7   4  17    5.90   10.10
   8   6  17    0.10    9.70
  10   9  17   -1.50    9.90
  11  10  17   28.80   10.30
   6 -10  16    1.40   12.20
   5  -7  16   23.90    9.80
   5  -6  16   22.30   10.30
   5  -1  16   23.40    8.60
   5   0  16    1.50    9.20
   6   4  16   12.30    7.70
   7   6  16  184.98    9.00
   9   9  16    5.70    8.50
  10  10  16   46.30    9.30
   7 -14  15   91.09   15.00
   6 -12  15   19.20   12.40
   5 -10  15  108.49    8.30
   4  -6  15   75.39    6.90
   4  -5  15   24.60    8.60
   4  -4  15   20.80    9.00
   4  -3  15   80.69    9.10
   4  -2  15    6.00    8.30
   4  -1  15    9.30    5.70
   5   3  15   22.00    7.80
   8   9  15   19.50    7.50
   9  10  15  143.49    8.30
   7 -15  14    7.90   14.10
   4  -9  14   19.40    7.20
   4  -8  14   13.40    8.90
   4   2  14   32.70    7.40
   5   5  14   78.89    6.80
   6   7  14   25.00    6.80
   8  10  14   58.99    6.50
   9  11  14    4.70    7.10
  10  12  14   43.70    7.80
  11  13  14   34.40    7.70
   7 -16  13   13.40   13.90
   5 -13  13   19.80   10.40
   4 -11  13   52.49    7.20
   3  -7  13   65.79    7.50
   3  -6  13   79.89    8.20
   3   0  13   -5.30    6.70
   4   4  13   33.40    6.10
   6   8  13   32.40    5.30
   9  12  13   97.39    5.80
   7 -17  12   75.49   13.40
   5 -14  12   25.00   10.00
   4 -12  12   19.70    9.40
   3  -9  12    6.30    8.00
   6   9  12   47.20    5.90
   5 -15  11   38.30   10.10
   4 -13  11   29.50    8.90
   3 -11  11   65.69    5.70
   2  -7  11  305.47    7.50
   2  -6  11  159.78    6.80
   2   0  11  517.45    6.30
   3   4  11   61.19    4.90
  11  15  11   13.50    5.00
   6 -17  10   49.90   10.80
   4 -14  10  154.38    9.00
   3 -12  10   85.89    7.40
   2  -9  10    8.50    6.60
   2   2  10   60.79    4.50
   7 -19   9   27.70   11.80
   3 -13   9   47.80    5.70
   2 -10   9   89.19    6.70
   1  -5   9  102.09    5.70
   1  -4   9  259.57    6.00
   1  -3   9  141.69    5.60
   1  -2   9  764.92    6.40
   1  -1   9   14.10    3.60
   5 -17   8  124.69    8.70
   2 -11   8   51.39    5.90
   1  -7   8  224.28    5.50
   1   1   8  142.19    4.30
   3   7   8  267.27    3.20
   3 -14   7   99.19    6.70
   2 -12   7  209.78    5.90
   1  -9   7  156.88    4.00
   1   2   7  101.19    3.40
   7 -20   6   52.19    9.70
   6 -19   6    5.30    8.40
   1   3   6  343.37    3.10
   3   8   6    5.70    1.80
   5 -18   5   80.29    7.20
   1 -10   5  117.79    4.50
   0  -5   5    5.10    2.70
   0  -4   5   -3.10    3.60
   0  -3   5   -9.20    3.80
   0  -2   5   -0.50    3.60
   4  10   5   26.40    1.10
   3 -15   4  150.78    5.70
   2 -13   4  141.19    5.20
   0  -6   4   62.79    3.20
   1   4   4  213.68    2.00
   9  16   4  111.49    2.80
   4 -17   3    1.50    5.10
   0   0   3    0.90    2.40
   4 -17   2   30.70    4.60
   1 -11   2   78.79    3.10
   5  12   2   30.80    2.00
   4 -17   1   75.69    4.60
   3   9   1   36.80    1.50
   5  12   1   67.69    2.50
   2   7   0  120.19    2.00
   9  16   0    8.50    4.70
   3 -15  -1   76.39    3.10
   2 -13  -1  130.69    2.50
   6  13  -1   86.49    4.00
   7  14  -1  119.29    4.10
   8  15  -1   59.39    4.30
  12  18  -1   18.00    6.60
   0  -4  -2 1845.12    1.50
   0  -3  -2  336.37    1.20
   1   3  -3   83.49    3.00
   2   6  -3  122.49    3.10
   3   8  -3  180.28    3.50
  11  17  -3   -0.10    6.80
   1   2  -4  390.56    3.70
  10  16  -4   65.09    6.90
  13  18  -4   15.20    9.10
   3   7  -5  194.98    4.50
   7  13  -5   26.50    5.20
   8  14  -5    1.40    6.20
  12  17  -5   55.99    9.30
   1  -4  -6  151.38    2.80
   1  -3  -6  330.07    3.40
   1  -2  -6  724.93    4.10
   3   6  -6    7.90    3.30
  11  16  -6   38.20    8.90
   2   2  -7  611.64    5.40
   3   5  -7  115.69    3.80
   5   9  -7    6.40    3.90
   7  12  -7    6.60    6.20
   8  13  -7   53.09    7.00
   9  14  -7   11.50    8.10
  13  17  -7   40.20   10.80
   8 -19  -8    6.90    2.60
   5 -15  -8   80.29    2.90
   2  -6  -8    9.00    3.00
   2   0  -8  163.28    5.00
   3   4  -8  250.97    5.80
   6  10  -8   36.10    6.50
  11  15  -8   35.40    9.80
   5 -14  -9   16.60    3.50
   4 -12  -9   20.30    3.80
   3  -9  -9  141.19    3.50
   3   2  -9   80.69    4.10
   4   5  -9   25.70    4.10
   6   9  -9  107.19    7.10
  13  16  -9   25.70   11.20
   5 -13 -10   22.00    4.10
   3  -6 -10   62.99    4.60
   3  -1 -10   72.19    3.90
   3   0 -10    4.90    5.30
   4   4 -10  130.59    6.30
   5   6 -10   91.89    5.10
   6   8 -10   72.49    7.20
   8  11 -10   92.79    8.20
   9  12 -10   31.30    9.10
  10  13 -10   83.59    9.80
   4  -8 -11    7.60    4.60
   4   2 -11   28.00    6.20
   5   5 -11  335.27    7.50
   6   7 -11    5.50    7.10
   8  10 -11   27.00    8.90
   9  11 -11   53.59    9.20
  10  12 -11   19.70    9.40
  11  13 -11   55.39   11.40
  12  14 -11   70.19   11.70
   7 -14 -12   -0.10    6.00
   6 -12 -12    8.60    5.10
   4  -4 -12  210.78    6.00
   4  -3 -12  160.18    6.00
   4  -2 -12  659.53    6.90
   5   3 -12   53.99    6.90
   7   7 -12   55.79    6.00
   8   9 -12  122.39    8.70
   9  10 -12    2.40    9.50
  10  11 -12   24.00    8.00
  11  12 -12   49.40    8.90
  12  13 -12   31.10   13.50
   8 -14 -13   22.30    6.60
   6 -10 -13   40.70    6.60
   5  -6 -13   93.29    6.70
   5  -5 -13   72.79    5.20
   5  -1 -13   94.69    6.80
   5   0 -13    4.00    7.00
   6   3 -13  123.69    5.80
   7   6 -13   31.20    8.80
   9   9 -13   84.79   10.80
  10  10 -13    9.90   11.10
  11  11 -13   20.00    9.30
  12  12 -13   18.30   12.50
  13  13 -13   11.00   15.20
   9 -14 -14    2.50    7.70
   6  -7 -14   13.80    7.10
   6   0 -14  141.59    6.00
   6   1 -14   -6.00    7.90
   7   4 -14   -2.00    8.80
   8   6 -14   32.60    9.40
  10   9 -14   55.99   11.90
  11  10 -14   10.10   13.10
  12  11 -14   -8.30   14.10
  13  12 -14    6.80   15.20
   7  -8 -15   -3.90    7.80
   7  -7 -15   42.50    7.90
   7   0 -15    2.90    6.20
   7   1 -15    5.20    9.10
   8   4 -15  116.99   10.50
   9   6 -15  118.99   10.90
  10   7 -15    6.00    8.60
  12  10 -15   20.00   13.80
  10 -12 -16   -2.60   10.40
   9 -10 -16   10.80   10.00
   8  -7 -16   21.60    9.80
   8   0 -16  205.98    8.00
   8   1 -16   96.79   10.80
   9   3 -16   12.80    8.10
   9   4 -16    7.40   10.50
  11   7 -16    0.40   13.30
  12   8 -16   19.00   10.80
  13   9 -16   44.80   13.00
  10 -10 -17   55.59   10.70
   9  -7 -17   13.50   10.80
   9  -6 -17   84.29   11.40
   9  -5 -17   90.09    8.00
   9  -2 -17   33.80    8.70
   9  -1 -17    0.70   11.40
   9   0 -17   10.60   11.80
  10   3 -17  110.29   12.70
  11   5 -17   -3.10   13.40
  11  -8 -18   14.50    9.90
  10  -6 -18   11.10   11.50
  10  -5 -18   12.90   13.20
  10  -4 -18   96.99   13.30
  10  -3 -18   34.80   12.60
  10  -2 -18   22.70   13.20
  10  -1 -18    1.70   12.30
  11   2 -18   48.70   15.30
  12   4 -18   36.70   14.50
  12  -1 -19   13.80   11.50
  12   0 -19   39.40   14.80
  12   1 -19    2.50   17.10
   9  -5  20   16.60   12.40
   9  -4  20   -0.10   15.90
   9  -3  20   18.50   14.70
   9  -2  20   -5.60   14.10
   9  -1  20    0.20   11.20
  10   2  20   43.20   15.10
   8  -6  19   -2.10   10.80
   8  -5  19   33.50   14.90
   8  -4  19   33.90   14.30
   8  -3  19   11.30   14.40
   8  -2  19   19.40   14.40
   8  -1  19   37.50   12.50
   8   0  19   27.20    9.60
   9   3  19   32.80   11.80
  10   5  19   14.70   12.40
   8 -10  18   31.50   12.10
   8  -9  18   23.50   14.70
   7  -6  18    7.60   11.90
   7  -5  18  103.89   12.50
   7  -4  18   38.90   12.50
   7  -3  18   37.50   12.60
   7  -2  18   87.79   12.30
   7  -1  18   12.20   11.90
   7   0  18   -2.00    8.50
   8   3  18   82.49   11.50
   9   5  18   -5.20   10.40
  10   7  18   34.80   12.10
  11   8  18   -0.60   12.70
   8 -12  17   28.70   12.70
   7 -10  17    0.50   10.50
   7  -9  17   27.20   13.30
   6  -6  17   98.99    8.70
   6  -5  17   50.99   11.70
   6  -4  17    2.20   10.90
   6  -3  17   27.50   10.50
   6  -2  17    9.40   11.00
   6  -1  17  320.67   11.00
   6   0  17  134.19    7.60
   7   3  17    4.90    9.70
   9   7  17    1.30   10.10
   8 -13  16   11.60   14.20
   7 -12  16   51.09   11.30
   6  -9  16   15.10   11.50
   5  -5  16   23.20    7.60
   5  -4  16   11.20    7.30
   5  -3  16   17.30    9.20
   5  -2  16   24.00    6.90
   6   3  16    7.20    8.00
   7   5  16    6.70    8.20
   8   7  16   17.90    8.60
  11  11  16   -5.50    8.90
   7 -13  15   10.20   13.90
   6 -11  15   53.69   12.50
   5  -9  15   64.69    7.80
   5  -8  15  317.57   10.70
   5   2  15  124.39    8.20
   6   5  15   95.89    7.50
   7   7  15   36.00    7.70
  10  11  15    7.80    7.60
  11  12  15   22.70    7.80
   8 -16  14   30.60   13.90
   6 -13  14    9.60    9.10
   5 -11  14   17.20    7.80
   4  -7  14  104.59    9.30
   4   1  14  319.17    7.80
   5   4  14   20.90    6.40
   6 -14  13    4.00   12.10
   5 -12  13   76.29   10.70
   4 -10  13    8.50    6.70
   3  -5  13   79.29    5.70
   3  -4  13   43.60    7.40
   3  -3  13   40.40    7.10
   3  -2  13   11.00    6.80
   3  -1  13   16.30    5.20
   4   3  13   29.50    6.10
   5   6  13   99.89    5.90
   6 -15  12   81.79   11.60
   4 -11  12   39.20    8.80
   3  -8  12  269.77    8.10
   3   2  12  352.76    6.10
   4   5  12  152.88    5.70
   5   7  12    3.20    5.10
  12  15  12    2.50    5.40
   6 -16  11  153.38   11.80
   3 -10  11   69.89    7.30
   2  -5  11   44.60    6.20
   2  -4  11  234.48    6.50
   2  -3  11   57.09    6.40
   2  -2  11  442.26    6.40
   2  -1  11  119.49    4.20
   4   6  11   30.90    4.30
   5   8  11  360.66    5.40
   7  11  11  197.88    4.90
  10  14  11    5.60    4.90
   7 -18  10   91.09   12.00
   5 -15  10    4.80    8.70
   3 -11  10   96.59    7.60
   2  -8  10   29.30    5.10
   3   5  10  341.37    4.80
   5   9  10  206.78    3.80
   5 -16   9  106.19    9.10
   4 -14   9   84.19    7.60
   3 -12   9    2.30    7.30
   2  -9   9   26.80    6.00
   2   3   9  297.67    4.60
   3   6   9  212.28    4.00
   4   8   9   25.70    3.30
   6  11   9    3.70    3.40
   7 -19   8   72.59   11.00
   6 -18   8   -1.30    9.10
   4 -15   8  134.29    8.10
   3 -13   8   95.89    7.10
   1  -6   8  225.88    5.50
   1   0   8    8.20    4.40
   1  -8   7  512.85    5.60
   2   5   7  591.24    3.60
   6  12   7   57.89    2.20
   2 -12   6  391.96    6.10
   1  -9   6  482.75    5.50
   7 -20   5   16.00    8.70
   6 -19   5    6.60    7.70
   6 -19   4   39.80    7.70
   5 -18   4   21.40    6.40
   0  -5   4  342.37    3.10
   0  -4   4   92.99    3.40
   0  -2   4  230.18    3.70
   0  -1   4  534.15    2.90
   5 -18   3   58.89    6.70
   3 -15   3   28.60    4.40
   2 -13   3  108.19    4.10
   5  12   3  378.36    1.80
   5 -18   2   44.80    5.90
   3 -15   2   33.30    4.60
  10  17   2    4.20    4.20
  10  17   1   31.20    5.20
   5 -18   0   73.29    5.10
   3 -15   0  143.29    3.70
   2 -13   0   55.59    2.70
   0  -6   0   72.19    1.60
   3   9   0  100.89    2.20
   5  12   0   39.20    3.00
  10  17   0  232.78    5.60
   5 -18  -1  121.09    4.00
   5  12  -1   80.09    3.70
   9  16  -1  115.59    4.80
   6 -19  -2    2.80    4.00
   0  -2  -2   81.19    1.40
   6  13  -2   23.70    4.50
   7  14  -2   84.29    4.40
   8  15  -2  103.89    4.90
   9  16  -2    1.10    5.70
  12  18  -2   23.70    7.20
   4 -16  -3   38.10    2.40
   4  10  -3  509.85    4.40
   5  11  -4   62.89    4.20
  11  17  -4   89.09    7.70
   1   1  -5  140.99    2.90
   2   5  -5  330.57    4.60
   4   9  -5   13.20    3.10
   6  12  -5  338.17    5.70
   9  15  -5   12.30    6.90
  10  16  -5   34.90    8.00
  13  18  -5   31.80   11.50
   1  -5  -6  221.98    2.60
   1  -1  -6   65.29    3.50
   2   4  -6  418.96    5.00
   5  10  -6   38.00    3.70
  12  17  -6   15.70    9.80
   3 -12  -7  190.58    2.40
   2  -9  -7  150.18    2.60
   6  11  -7  382.26    7.00
  10  15  -7    2.50    7.90
  11  16  -7   14.90    8.70
   3 -11  -8   13.40    2.70
   2  -7  -8   80.09    3.10
   2   1  -8  438.06    5.60
   4   7  -8   90.39    5.50
  12  16  -8   11.00    9.90
   3   3  -9  199.88    5.70
   4   6  -9   46.20    5.60
   5   8  -9  119.19    6.60
   7  11  -9   14.50    7.20
   8  12  -9   87.79    8.30
   9  13  -9   26.80    8.20
  10  14  -9   15.60    9.90
  11  15  -9   12.80    9.60
   6 -15 -10   46.70    4.30
   4 -11 -10   50.49    4.40
   3  -7 -10  321.67    4.70
   3   1 -10   68.39    5.70
   5   7 -10   75.59    6.90
   7  10 -10   30.10    7.90
  11  14 -10   80.29    8.20
  12  15 -10    7.70   11.80
   4  -9 -11   31.00    4.40
   4   3 -11  259.27    6.30
   7   9 -11   31.50    8.10
  13  15 -11   21.10   13.70
   9 -17 -12    6.10    6.40
   5 -10 -12   23.50    5.30
   4  -6 -12   80.99    5.70
   4  -5 -12  147.19    4.50
   4  -1 -12   30.40    6.10
   4   0 -12 1030.40    8.10
   5   4 -12  175.78    7.50
   6   6 -12   34.60    7.20
   7   8 -12   33.60    8.40
  13  14 -12    8.00   10.60
   9 -16 -13   25.10    7.50
   7 -13 -13   40.80    6.80
   6 -11 -13    4.00    7.00
   5  -7 -13   84.69    6.00
   5   1 -13   94.09    7.10
   6   4 -13  208.98    6.40
   8   8 -13   -4.90    9.00
   8 -13 -14    6.50    7.10
   7 -11 -14   85.29    7.20
   6  -8 -14   -4.60    7.20
   6   2 -14   31.70    8.00
   7   5 -14  102.69    9.20
   8   7 -14   29.70    9.30
   9   8 -14   56.99    8.10
   9 -13 -15   22.90    8.80
   8 -11 -15   24.40    8.10
   7  -9 -15   38.20    7.40
   7   2 -15   76.29    9.00
   8   5 -15   12.20   10.10
   9   7 -15   28.70   10.80
  10   8 -15   14.30   11.20
  11   9 -15    9.10   10.10
  13  11 -15   29.80   11.70
   9 -11 -16    4.90    9.90
   8  -9 -16   75.69    8.70
   8  -8 -16    1.40    8.80
   7  -3 -16   11.10    8.90
   8   2 -16  157.88   10.00
   9   5 -16   56.49   10.80
  10   6 -16   18.70    8.80
  11   8 -16    0.80   14.00
  12   9 -16   22.50   16.00
  10 -11 -17   12.30   12.20
   9  -8 -17    4.10   10.90
   9   1 -17   16.10    8.70
   9   2 -17   31.00   11.80
  10   4 -17   22.40   12.00
  11   6 -17   36.50   13.70
  12   7 -17   -3.20   11.60
  10  -7 -18   44.50   12.50
  10   0 -18   10.60   10.00
  10   1 -18   -8.40   13.80
  11   3 -18   22.00   10.60
  11   4 -18   30.80   13.00
  12   5 -18   14.50   11.30
  11  -5 -19   17.40   14.80
  11  -4 -19   13.10   13.60
  11  -3 -19   15.00   13.60
  11  -2 -19   33.70   14.60
  11  -1 -19   -1.90   14.80
  11   0 -19   -1.60   13.80
  12   2 -19   33.40   15.70
  10  -1  20   10.90   14.80
  10   0  20   67.59   15.70
  10   1  20   24.10   11.20
   9  -8  19  -10.60   11.60
   9  -7  19   22.70   15.90
   9   1  19   58.99   13.00
   9   2  19   28.70   10.20
  10   4  19   22.10   12.90
   9 -10  18   22.70   15.20
   8  -8  18   50.79   12.80
   8  -7  18   61.49   12.80
   8   2  18   -0.10   11.40
   9   4  18   13.70   10.80
  10   6  18    8.40   10.80
   8 -11  17    9.10   11.70
   7  -8  17   14.50   12.60
   7   2  17    6.30    9.60
   8   5  17    4.50    7.40
  10   8  17   47.50   10.30
  11   9  17   13.80   11.40
   7 -11  16   37.00   10.30
   6  -8  16   -2.40    7.90
   6  -7  16    5.30   10.70
   6   1  16   18.80    8.60
   6   2  16   50.29    6.80
   9   8  16   92.59    9.20
   8 -14  15   36.50   14.60
   7 -12  15   35.30   12.10
   6 -10  15   15.60   11.50
   5  -7  15   99.29    9.50
   5  -6  15   95.09    9.80
   5   0  15   -9.00    7.50
   5   1  15    4.30    7.50
   6   4  15   33.30    7.90
   8   8  15    8.20    7.70
   8 -15  14   15.90   13.30
   7 -14  14  127.69   12.10
   6 -12  14   32.20   12.40
   5 -10  14   11.00    7.60
   5  -9  14   84.19    9.50
   4  -6  14   67.89    6.20
   4  -5  14  132.09    8.60
   4  -4  14  296.47    8.50
   4  -3  14   36.80    7.80
   4  -2  14   34.70    7.50
   4  -1  14  335.27    8.20
   4   0  14  133.19    5.70
   6   6  14   -3.10    6.90
   7   8  14   59.09    6.30
   7 -15  13   28.90   13.00
   6 -13  13   -1.20   10.80
   5 -11  13   36.40    9.40
   4  -9  13  135.89    6.60
   4  -8  13   21.00    8.50
   4   2  13    3.10    6.10
   7   9  13   23.50    5.80
   8 -17  12    9.70   12.60
   7 -16  12    5.10   12.90
   5 -13  12   32.70    7.40
   4 -10  12   50.89    8.10
   3  -7  12   72.99    5.50
   3  -6  12  256.77    7.70
   3   0  12   -3.20    5.90
   3   1  12    1.30    4.20
   7  10  12   76.49    4.90
   8 -18  11    9.80   12.90
   7 -17  11   10.10    8.90
   5 -14  11   30.20    7.00
   4 -12  11    9.70    6.60
   3  -9  11   39.70    7.20
   3   3  11  101.59    5.00
   8  12  11   49.50    4.70
   9  13  11   68.29    5.00
   6 -16  10   24.80   10.00
   4 -13  10    6.10    7.90
   2  -7  10   75.79    4.80
   2  -6  10  128.79    6.30
   2   0  10 1284.97    6.90
   2   1  10   32.60    3.50
   4   7  10   34.10    4.00
  12  16  10    2.70    4.40
   8 -19   9    3.40   11.40
   7 -18   9   18.30   11.00
   6 -17   9   11.00    9.20
  10  15   9   10.10    3.40
   5 -16   8   30.00    8.70
   2 -10   8   15.70    4.10
   1  -5   8  131.49    4.00
   1  -4   8  370.46    5.90
   1  -3   8   83.39    5.30
   1  -2   8  253.57    5.20
   1  -1   8  131.19    3.70
   2   4   8  188.08    3.60
   5  10   8  154.18    3.30
   4 -15   7    2.90    7.30
   3 -13   7   55.09    6.50
   2 -11   7  107.59    4.10
   1  -7   7   39.40    4.70
   1   1   7  385.06    4.40
   4   9   7  198.78    2.80
   9  15   7   47.00    2.10
   1  -8   6  139.89    4.80
   5  11   6  175.68    1.90
   4 -16   5    6.90    6.50
   1  -9   5  257.27    4.60
   8 -21   4   43.50    9.30
   7 -20   4   20.90    7.80
   0  -3   4  192.58    2.60
   8 -21   3   17.00    9.20
   7 -20   3    3.80    8.40
   6 -19   3    6.30    7.40
   0  -1   3    6.00    2.70
  10  17   3    5.30    3.50
   2 -13   2   50.99    3.50
   5 -18   1  121.29    4.80
   3 -15   1   79.29    3.70
   2 -13   1  127.89    3.20
   0  -6   1    1.80    1.90
  13  19   1   90.49    6.80
  13  19   0    4.20    7.30
   6 -19  -1   14.50    4.60
   2   7  -1   12.00    2.00
   3   9  -1   34.60    2.20
  10  17  -1   29.90    5.90
  13  19  -1   90.09    8.00
   8 -21  -2    0.30    5.20
   7 -20  -2   72.79    4.50
   1   4  -2   76.89    2.40
   5  12  -2   34.30    4.10
   6  13  -3  216.58    5.20
   7  14  -3   13.40    4.90
   8  15  -3   89.89    5.50
   9  16  -3   86.39    6.80
  12  18  -3    1.70    8.00
   2   6  -4    6.00    3.50
   3   8  -4  698.73    4.70
   5  11  -5   25.90    4.90
  11  17  -5   19.60    8.60
   3 -13  -6   20.60    1.50
   1  -6  -6  174.28    2.20
   1   0  -6    1.80    3.70
   3   7  -6  477.55    5.40
   4   9  -6   56.39    4.60
   7  13  -6   12.70    6.20
   8  14  -6    0.90    6.80
   9  15  -6   26.00    7.40
  13  18  -6    4.40   11.20
   2   3  -7  290.97    3.80
   3   6  -7    8.20    3.50
   4   8  -7   65.89    3.90
   5  10  -7   56.29    5.60
  12  17  -7   10.90   10.90
   7 -18  -8   18.50    2.40
   2   2  -8  119.19    4.90
   3   5  -8   22.40    5.10
   5   9  -8    1.20    4.10
   7  12  -8   81.99    7.00
   8  13  -8   10.80    7.70
   9  14  -8   14.50    8.90
  10  15  -8   22.30    9.40
  13  17  -8   18.80   11.80
   6 -16  -9   33.80    3.60
   3 -10  -9   77.49    3.60
   2  -5  -9  140.39    3.90
   2  -4  -9  110.99    4.20
   2  -3  -9  284.77    3.70
   2  -2  -9   87.79    4.60
   2  -1  -9  133.59    4.90
   3   4  -9   22.20    5.70
   6  10  -9  126.49    7.30
  12  16  -9   -2.70   11.70
   3  -8 -10  210.68    4.30
   3   2 -10   96.59    5.90
   4   5 -10  209.78    5.10
   6   9 -10   25.80    7.50
  13  16 -10    6.30   13.60
   8 -17 -11    8.30    5.30
   6 -14 -11  134.29    5.20
   5 -12 -11   52.79    4.30
   3  -5 -11   22.40    4.60
   3  -4 -11   67.79    5.20
   3  -3 -11  108.09    5.40
   3  -2 -11  218.48    5.90
   3  -1 -11   59.69    5.70
   5   6 -11  315.07    7.40
   6   8 -11   33.90    7.70
   8  11 -11   90.39    9.60
   9  12 -11    3.20    9.70
  10  13 -11   47.30   10.60
  11  14 -11   10.80   11.90
   8 -16 -12   20.00    6.20
   6 -13 -12  104.29    5.90
   4  -7 -12   22.30    5.50
   4   1 -12   19.90    6.80
   6   7 -12    3.80    7.40
   8  10 -12   47.90    9.80
   9  11 -12   66.49   10.00
  10  12 -12  113.69    8.60
  11  13 -12   58.49   11.30
  12  14 -12   35.70   13.90
   8 -15 -13   15.90    7.20
   5  -8 -13  161.68    6.10
   5   2 -13   34.90    5.30
   6   5 -13  196.48    6.40
   7   7 -13    9.50    6.30
   8   9 -13   14.80    9.10
   9  10 -13    0.20   10.90
  10  11 -13    9.60    8.50
  11  12 -13   35.80    9.10
  12  13 -13   33.90   14.70
   9 -15 -14   38.00    8.70
   6  -9 -14   35.70    7.20
   5  -5 -14   83.89    6.90
   5  -4 -14   24.40    7.60
   5  -3 -14  105.29    7.90
   5  -2 -14   -5.00    7.40
   5  -1 -14   12.90    7.10
   6   3 -14   15.20    8.30
   9   9 -14   31.00   11.40
  10  10 -14   52.29   11.70
  11  11 -14  124.59   12.60
  12  12 -14   12.20   13.00
   8 -12 -15   76.29    8.80
   6  -6 -15   86.39    8.10
   6  -5 -15   73.39    8.10
   6  -4 -15   35.00    6.20
   6  -3 -15    1.70    5.80
   6  -2 -15   85.89    6.20
   6  -1 -15  105.29    8.40
   6   0 -15  327.47    9.10
   7   3 -15   11.50    6.90
   8   6 -15    8.40   10.00
  10   9 -15   16.40   12.80
  11  10 -15   21.40   14.60
  12  11 -15   70.39   15.20
   9 -12 -16    5.80   10.30
   7  -6 -16  178.08    9.80
   7  -5 -16    0.10    8.60
   7  -4 -16  104.59    7.10
   7  -2 -16   38.50    7.10
   7  -1 -16   37.60    9.20
   7   0 -16   -6.20    9.40
   8   3 -16   93.89    7.70
   9   6 -16   34.50   11.00
  10   7 -16    8.20    9.50
  12  10 -16   -2.50   14.80
   9  -9 -17   16.40   10.90
   8  -6 -17    3.60   10.70
   8  -5 -17   -4.20   10.50
   8  -4 -17   20.50    9.90
   8  -3 -17   73.19    7.80
   8  -2 -17   16.80    7.70
   8  -1 -17   17.70   11.00
   8   0 -17   40.70   11.60
   9   3 -17  128.69   11.60
  10   5 -17   55.79    9.40
  11   7 -17   23.50   14.10
  12   8 -17   -7.60   15.30
  10  -9 -18    1.60   11.40
  10  -8 -18   46.40    9.60
   9  -5 -18   -4.50   12.20
   9  -4 -18   10.30   12.20
   9  -3 -18   11.40   12.30
   9  -2 -18    2.10   12.70
   9  -1 -18   -2.80   12.60
  10   2 -18   18.50   10.30
  10   3 -18   41.00   13.00
  11   5 -18   51.09   14.90
  12   6 -18    1.70   11.80
  11   1 -19   -8.90   15.10
  11   2 -19   37.40   15.10
  10  -2  20   50.19   12.00
   9  -6  19   21.80   11.60
   9  -5  19   31.40   14.30
   9  -4  19   85.79   15.10
   9  -3  19   47.50   14.60
   9  -2  19   26.40   14.90
   9  -1  19   54.39   13.40
   9   0  19   -3.40   10.00
  10   3  19   30.00   13.80
  11   5  19   17.20   13.20
   9  -9  18   25.20   15.30
   8  -6  18    5.90   12.30
   8  -5  18   51.19   13.50
   8  -4  18   13.60   12.10
   8  -3  18   64.79   12.30
   8  -2  18    6.60   11.70
   8  -1  18  169.28   13.20
   8   0  18   67.39   12.20
   8   1  18  157.38    9.10
   9   3  18    8.00   10.90
  11   7  18    6.90   12.10
   8 -10  17   16.40   10.90
   8  -9  17   15.70   12.00
   7  -7  17   77.59    8.80
   7  -6  17    9.10   11.70
   7  -5  17   12.00   11.50
   7  -1  17   22.90    9.90
   7   0  17    0.40   10.60
   7   1  17   13.50    7.40
   8   4  17   12.20    9.50
   9   6  17   89.29    9.90
   9 -13  16   33.90   14.80
   8 -12  16   53.09   11.20
   7 -10  16   73.19    9.10
   7  -9  16   66.69   12.10
   6  -6  16  -10.60    9.90
   6  -5  16   12.70   10.20
   6  -4  16   -0.20    9.60
   6  -3  16    1.70    9.60
   6  -2  16   63.09    9.10
   6  -1  16   10.70    9.50
   6   0  16  118.29    9.60
   7   4  16  105.69    8.40
   8   6  16   53.69    9.20
  10   9  16   25.30    9.30
  11  10  16   78.79   10.40
   8 -13  15   -6.90   13.40
   6  -9  15   50.89   10.70
   5  -5  15   37.50    6.80
   5  -4  15   -5.50    9.40
   5  -3  15   25.20    8.80
   5  -2  15  126.59    8.60
   5  -1  15    1.20    7.50
   6   3  15   -2.20    7.50
   7   6  15   73.89    7.30
   9   9  15   15.60    7.70
   7 -13  14   14.30   12.60
   6 -11  14   35.60   11.20
   5  -8  14   29.20    9.60
   5   3  14  100.29    5.40
   8   9  14   -4.40    6.60
   8 -16  13    5.40   10.40
   7 -14  13   30.30   11.60
   5 -10  13   50.19    8.90
   4  -7  13   23.30    8.00
   4   1  13   16.90    6.70
   5   5  13   70.59    6.00
   6   7  13   43.70    5.80
   8  10  13   13.90    5.60
  12  14  13   12.40    7.40
   6 -14  12    8.20   10.00
   5 -12  12   30.30    9.70
   4  -9  12   52.19    7.60
   3  -5  12   10.60    5.00
   3  -4  12  297.87    7.40
   3  -3  12   13.20    6.70
   3  -2  12  375.16    7.20
   3  -1  12    4.10    6.20
   4   4  12  202.58    4.40
   6   8  12   41.50    5.60
   8  11  12  131.79    5.00
   9  12  12  100.49    5.80
  10  13  12   30.30    5.70
  11  14  12    4.50    5.50
   6 -15  11    7.10    9.30
   5 -13  11   14.30    9.40
   4 -11  11   20.20    8.10
   3  -8  11   21.50    6.80
   3   2  11  221.88    5.60
   8 -18  10    6.30   11.30
   7 -17  10   62.29   11.40
   5 -14  10   27.50    9.00
   4 -12  10   26.00    8.10
   3 -10  10   17.00    5.30
   2  -5  10   14.50    5.70
   2  -4  10  126.39    6.30
   2  -3  10   12.70    5.70
   2  -2  10   66.79    5.70
   2  -1  10   34.00    5.40
   3   4  10   49.80    4.40
   6  10  10   31.60    4.30
   5 -15   9   54.69    9.00
   4 -13   9   61.09    8.10
   3 -11   9  103.99    7.20
   2  -8   9  230.18    4.80
   2  -7   9   89.89    5.50
   2   2   9  100.39    4.30
   7  12   9   68.69    3.40
   9  14   9   94.79    3.90
   6 -17   8   37.50    9.30
   4 -14   8   33.10    7.40
   3 -12   8   93.09    7.10
   2  -9   8  147.49    6.00
   5 -16   7   68.39    7.40
   2 -10   7  303.17    6.00
   1  -6   7  295.07    5.10
   1   0   7   -0.70    4.10
   3   7   7  320.37    3.10
   7  13   7   14.80    2.20
   8 -20   6   31.50   10.90
   7 -19   6   31.10    8.60
   2 -11   6   11.30    4.90
   1   2   6  693.83    3.40
   5 -17   5   14.90    6.90
   1   3   5   17.60    2.30
   2   6   5  480.95    2.10
   4 -16   4   29.00    5.60
   4 -16   3   38.20    6.10
   0  -4   3    1.30    2.00
   0  -3   3    2.40    2.90
   0  -2   3   -6.60    2.80
   8 -21   2   -5.70    8.40
   7 -20   2   73.69    7.70
   6 -19   2    2.80    5.70
   1 -10   2  179.88    3.00
   8 -21   1    4.90    7.60
   7 -20   1    7.90    6.60
   6 -19   1   14.10    5.70
   1 -10   1  153.78    2.90
   8 -21   0   39.10    6.90
   7 -20   0   -0.60    5.70
   6 -19   0   33.00    4.90
  11  18   0   -4.40    6.00
   8 -21  -1    5.50    5.90
   7 -20  -1    8.30    5.10
   1 -10  -1  152.08    1.70
   0  -5  -1    0.00    0.80
   2   7  -2   64.09    2.60
   3   9  -2  315.37    3.30
  10  17  -2    8.80    5.60
  10  17  -3   -2.70    7.40
   5 -17  -4   37.80    2.40
   1   3  -4  224.68    3.00
   4  10  -4   61.39    3.80
   7  14  -4   22.30    5.00
   8  15  -4   76.79    6.00
  12  18  -4   -0.40    8.40
   1  -8  -5  205.38    1.70
   1   2  -5  260.77    2.90
   3   8  -5   78.89    4.30
   1   1  -6   75.99    3.90
   2   5  -6   39.50    4.60
   6  12  -6   73.29    5.50
  10  16  -6    5.30    7.90
   5 -16  -7   52.59    1.70
   1  -3  -7  380.56    3.90
   1  -2  -7   91.59    3.80
   2   4  -7  631.94    5.70
   8  14  -7   60.19    6.90
   2  -8  -8   29.20    2.80
   4   8  -8    3.00    5.40
   6  11  -8   47.80    7.10
  11  16  -8    6.90   10.50
   2  -6  -9  175.88    3.80
   2   0  -9  342.67    5.50
   4   7  -9   95.09    6.10
   5   9  -9  158.48    6.70
   3   3 -10  274.47    6.50
   4   6 -10  114.19    6.10
   5   8 -10   20.70    7.10
   7  11 -10  157.98    8.60
   8  12 -10  115.89    8.60
   9  13 -10  125.29    7.20
  10  14 -10    2.40    9.90
  11  15 -10    2.80   11.30
   4 -10 -11  118.89    4.40
   3  -6 -11   31.10    4.80
   3   0 -11    6.10    5.50
   4   4 -11    1.10    4.30
   5   7 -11  210.78    7.20
   7  10 -11   29.90    8.40
  12  15 -11    9.00   12.70
   5 -11 -12   98.99    5.00
   4  -8 -12   17.00    5.40
   4   2 -12  575.74    6.40
   5   5 -12   43.40    5.50
   7   9 -12   20.50    8.80
   5  -9 -13  116.89    6.30
   4  -4 -13   33.50    6.60
   4  -3 -13   34.10    6.50
   4  -2 -13   -1.40    6.80
   4  -1 -13   13.50    6.60
   5   3 -13   67.59    5.60
   6   6 -13   74.09    8.40
   7   8 -13   35.10    9.20
   8 -14 -14    9.80    8.10
   7 -12 -14   26.30    6.90
   6 -10 -14   46.00    6.90
   5  -6 -14   21.10    7.00
   5   0 -14   -1.30    7.20
   5   1 -14    0.60    7.40
   6   4 -14    7.10    8.20
   7   6 -14   20.80    7.00
   8   8 -14  113.59   10.00
   9 -14 -15   55.89   10.00
   7 -10 -15    7.60    7.80
   6  -7 -15   38.50    8.10
   6   1 -15  100.09    8.40
   6   2 -15   77.69    8.90
   7   4 -15  105.49    7.30
   9   8 -15   27.10   10.90
   8 -10 -16   24.50    9.00
   7  -8 -16  139.29    8.70
   7  -7 -16   14.80    8.60
   7   1 -16   25.60    7.60
   7   2 -16   36.80   10.10
   8   4 -16  129.69    8.30
   8   5 -16   48.30   10.40
  10   8 -16    4.70   13.30
  11   9 -16    9.10   10.80
   9 -10 -17   18.00   11.00
   8  -8 -17    2.90    9.50
   8  -7 -17   40.30   10.50
   8   1 -17    2.60    8.10
   8   2 -17   19.30   11.20
   9   4 -17   40.30    8.60
  10   6 -17    7.10    9.70
  11   8 -17    4.50   14.50
  12   9 -17   67.99   17.50
   9  -7 -18   58.69   11.90
   9  -6 -18   13.80   10.80
   9   0 -18    6.70    9.30
   9   1 -18   -0.90   12.80
  10   4 -18   66.99   14.00
  11   6 -18    8.80   15.10
  10  -6 -19   14.80   13.70
  10  -5 -19   12.60   14.30
  10  -4 -19   31.80   13.10
  10  -3 -19   17.50   10.60
  10  -2 -19   13.50   10.30
  10  -1 -19   11.60   13.50
  10   0 -19   12.40   14.80
  11   3 -19   14.90   16.60
  10  -7  19   -5.10   15.20
  10  -6  19   26.90   16.80
  10   1  19   13.60   14.40
  10   2  19   14.40   10.40
  11   4  19   -0.10   13.60
   9  -8  18   14.10   13.70
   9  -7  18   44.20   13.00
   9   2  18   -4.00   12.10
  10   5  18   17.00   10.80
   9 -11  17   47.00   12.40
   9 -10  17   27.90   14.20
   8  -8  17   21.20   12.50
   7  -4  17   11.50    8.00
   7  -3  17   -6.40    7.70
   7  -2  17   -6.30    8.30
   8   2  17    7.10    9.30
   8   3  17   69.99    9.30
   9   5  17   94.59   10.70
  10   7  17   24.40   10.40
  11   8  17    6.60    9.60
   8 -11  16   39.70   10.60
   7  -8  16  173.08   12.00
   7   3  16   24.00    8.40
   8   5  16   43.60    9.60
   9   7  16   58.59    9.10
   9 -14  15   77.39   15.60
   7 -11  15   37.80    9.30
   6  -8  15   56.89    9.50
   6  -7  15   46.00    9.50
   6   2  15   78.89    8.30
   7   5  15    8.70    7.90
   8   7  15    4.60    7.80
  10  10  15   14.20    7.80
  11  11  15   -1.80    8.20
  12  12  15    0.50    8.70
   9 -15  14   42.80   13.90
   8 -14  14    9.80   13.70
   7 -12  14   32.40   12.50
   6 -10  14   51.29   10.70
   5  -7  14   64.49    9.40
   5   1  14   12.80    7.30
   5   2  14    1.90    5.50
   6   5  14   25.30    6.60
   7   7  14   74.09    7.00
   9  10  14   37.60    6.70
  10  11  14  101.59    7.10
  11  12  14   11.40    8.30
  12  13  14    3.50    7.40
   8 -15  13   13.60   13.60
   6 -12  13   75.29   10.00
   5  -9  13  122.49    8.90
   4  -6  13   47.50    5.80
   4  -5  13   93.49    8.10
   4  -4  13   22.70    7.20
   4  -1  13    6.80    7.00
   4   0  13   44.80    7.10
   5   4  13   56.79    6.50
   9  11  13  160.98    6.10
  10  12  13   19.90    7.30
  11  13  13   -3.00    6.20
   8 -16  12   36.50   13.10
   7 -15  12   77.29    9.10
   6 -13  12  124.59   10.60
   5 -11  12  122.79    9.60
   4  -8  12   28.50    7.70
   4   3  12  145.69    5.70
   5   6  12  102.09    5.20
   8 -17  11    7.70   12.40
   7 -16  11   -1.10    8.60
   6 -14  11  152.18    9.50
   4 -10  11  132.09    8.20
   3  -7  11  209.58    5.60
   3  -6  11   21.90    6.80
   3   1  11   67.69    5.40
   4   5  11   43.40    4.60
   5   7  11  172.98    4.90
   6   9  11   39.30    4.20
   6 -15  10   49.50    9.40
   3  -9  10  215.68    5.70
   4   6  10  112.69    4.30
   6 -16   9   44.10    9.80
   3 -10   9  111.09    6.90
   2  -6   9  196.48    6.10
   2   1   9   98.29    4.80
   3   5   9    5.70    3.60
   5   9   9  145.09    3.90
   8  13   9   50.39    3.40
   8 -19   8    2.70   11.60
   7 -18   8   23.40    9.50
   5 -15   8   96.99    7.60
   2  -8   8   41.10    5.60
   2   3   8  118.69    3.90
   3   6   8  126.59    3.20
   4   8   8    4.70    3.20
   6 -17   7   22.00    7.90
   4 -14   7   31.00    6.50
   3 -12   7  244.98    6.70
   1  -5   7   33.70    3.50
   1  -4   7  171.78    4.90
   1  -3   7  443.46    5.10
   1  -2   7  113.29    4.60
   1  -1   7  410.56    4.70
   8  14   7   58.49    2.20
   3 -13   6   29.10    5.60
   1  -7   6  172.48    3.70
   2   5   6   29.80    2.70
   8 -20   5   -0.30   10.80
   7 -19   5   21.20    8.70
   6 -18   5   27.60    7.60
   1  -8   5  227.78    4.40
   5 -17   4   40.20    6.40
   3 -14   4   -3.60    4.60
   2 -12   3   49.20    4.00
   1   4   3   10.70    1.20
   4 -16   2   14.70    5.40
  11  18   2  114.69    4.60
   4  11   1   64.89    2.30
  11  18   1    7.60    5.10
   1 -10   0    5.40    1.70
   0  -5   0   12.70    1.50
   4  11   0  224.48    2.90
   4  11  -1   66.09    3.30
  11  18  -1    6.50    6.70
   4 -16  -2   14.40    3.00
   0  -1  -2 8174.18    5.30
  11  18  -2  108.79    7.50
   2 -12  -3   50.09    1.30
   1   4  -3   11.50    2.00
   2   7  -3  314.77    3.30
   3   9  -3  433.36    3.80
   5  12  -3  365.56    4.50
   1  -9  -4   86.49    0.80
   6  13  -4  140.79    5.10
   9  16  -4  106.59    6.70
  10  17  -4   -8.80    7.60
   2   6  -5  583.54    5.00
   4  10  -5   30.30    4.40
   7  14  -5    4.70    5.50
   8  15  -5   19.30    6.60
  12  18  -5    4.40    9.40
   1  -7  -6  164.08    2.30
   5  11  -6  199.98    5.70
  11  17  -6    7.80    8.70
   1  -5  -7   37.50    2.80
   1  -4  -7  144.39    2.50
   1  -1  -7  388.56    4.40
   3   7  -7  375.36    5.50
   4   9  -7  233.88    5.60
   6  12  -7   64.79    6.50
   7  13  -7   13.50    5.00
   9  15  -7   63.59    6.10
  10  16  -7   14.50    9.20
   2   3  -8  128.29    4.00
   3   6  -8  123.09    4.10
   5  10  -8  165.58    6.20
  12  17  -8    7.90   11.40
   2  -7  -9   84.69    3.70
   2   1  -9  119.79    4.00
   3   5  -9    6.50    5.70
   7  12  -9   79.99    8.20
   8  13  -9   53.79    6.00
   9  14  -9   84.49    7.10
  10  15  -9    7.80   10.10
  11  16  -9    1.20   10.10
   8 -18 -10   10.80    4.00
   3  -9 -10  207.28    4.10
   6  10 -10   31.90    7.90
  12  16 -10   -3.80   12.30
   7 -16 -11   -2.00    4.80
   3  -7 -11  203.78    4.90
   3   1 -11   56.79    4.10
   3   2 -11  252.37    6.20
   4   5 -11   36.60    6.80
   6   9 -11   39.10    7.40
   8  12 -11   62.59    9.00
   9  13 -11   76.69   10.10
  10  14 -11    2.30   10.60
   7 -15 -12   68.99    5.60
   4  -9 -12   43.50    5.50
   4   3 -12  147.19    5.40
   5   6 -12  106.09    7.90
   6   8 -12   45.40    8.20
   8  11 -12  130.49   10.20
   9  12 -12  101.99   10.20
  10  13 -12   32.20   10.90
  11  14 -12    1.70   13.00
   7 -14 -13   24.20    6.80
   6 -12 -13   61.59    6.00
   5 -10 -13   40.10    5.50
   4  -6 -13   40.60    6.30
   4  -5 -13   79.59    4.90
   4   0 -13   46.00    6.80
   4   1 -13   13.70    7.00
   5   4 -13   54.69    5.80
   6   7 -13   46.40    8.20
   8  10 -13   15.10   10.70
   9  11 -13  137.99    8.70
  10  12 -13   16.90    9.00
  11  13 -13    8.00    9.80
  12  14 -13   17.00   15.20
   5  -7 -14   65.69    6.60
   5   2 -14    2.30    7.80
   6   5 -14   17.50    8.90
   7   7 -14   75.19    9.20
   8   9 -14    2.20    9.60
   9  10 -14   48.50   11.20
  10  11 -14  103.49   10.00
  11  12 -14    9.30   10.20
  12  13 -14    3.90   14.10
   8 -13 -15   10.40    8.40
   7 -11 -15   32.10    7.90
   6  -8 -15   40.40    7.90
   6   3 -15   -8.00    9.40
   7   5 -15   11.70    7.00
   8   7 -15    1.40    7.90
   9   9 -15   10.50   12.50
  10  10 -15    9.20   12.30
  11  11 -15   -2.80   11.00
  12  12 -15   -8.90   14.70
   9 -13 -16   20.10   10.20
   8 -11 -16   46.50    9.30
   7  -9 -16   55.19   10.00
   6  -4 -16   14.80    8.40
   6  -3 -16   12.30    9.20
   6  -2 -16   50.19    9.40
   6  -1 -16   15.10    8.90
   7   3 -16   28.90    9.80
   9   7 -16   47.30    8.70
  10   9 -16   17.00   13.60
  11  10 -16   55.59   15.30
   9 -11 -17   31.10   10.80
   8  -9 -17    8.20    9.60
   7  -5 -17   10.90    9.30
   7  -4 -17   21.10    9.70
   7  -3 -17    3.50   10.40
   7  -2 -17   10.70   10.50
   7  -1 -17   20.90   10.50
   8   3 -17   79.79   11.80
   9   5 -17   91.39    9.10
  10   7 -17   29.00   12.50
   9  -8 -18   14.20   12.40
   8  -4 -18    4.80   10.80
   8  -3 -18   51.49   12.00
   8  -2 -18    0.80   12.10
   8  -1 -18  144.49   12.00
   9   2 -18    5.60   10.00
   9   3 -18   18.30   13.00
  10   5 -18   14.50   13.90
  11   7 -18   28.70   16.30
  10   1 -19   13.20   11.40
  10   2 -19   20.10   15.30
  11   4 -19    1.00   12.50
  10  -5  19    1.30   11.90
  10  -4  19   27.50   14.50
  10  -3  19   28.10   15.30
  10  -2  19   41.80   14.90
  10  -1  19    8.00   13.20
  10   0  19   11.20   10.30
  11   2  19   24.50   13.50
  11   3  19   17.60   13.10
  10  -9  18   -3.40   15.10
   9  -6  18    2.90   12.80
   9  -5  18   11.10   13.60
   9  -4  18    5.70   12.50
   9  -1  18    3.50   11.90
   9   0  18    6.60   12.30
   9   1  18   -7.50    8.80
  10   4  18  105.49   11.00
  11   6  18    8.60   11.30
  10 -11  17   24.70   16.90
   9  -9  17   18.30   14.20
   8  -7  17   33.80    9.30
   8  -6  17   -2.40   11.90
   8  -5  17   -0.90   11.20
   8   0  17   45.20   10.40
   8   1  17    4.60   10.40
   9   4  17   38.70   10.80
  10   6  17    4.00   10.70
  12   9  17   58.79   11.20
   9 -12  16    1.70   11.50
   8 -10  16   31.10   10.00
   8  -9  16   88.39   11.70
   7  -7  16   16.00    8.10
   7  -6  16  190.38   11.20
   7   1  16   21.60    9.40
   7   2  16   44.70    6.80
   8   4  16  124.59    8.90
  10   8  16   16.00    9.50
   9 -13  15   27.90   13.80
   8 -12  15  100.19   10.60
   7 -10  15    7.40    8.50
   7  -9  15   40.70   10.80
   6  -6  15  106.29    9.90
   6  -5  15   89.59    9.30
   6   0  15  302.67    8.30
   6   1  15  103.09    8.50
   7   4  15  108.09    7.70
   9   8  15   15.00    7.80
   8 -13  14    1.50   13.20
   6  -9  14   43.50   10.20
   5  -6  14   23.60    6.10
   5  -5  14   77.19    8.60
   5  -4  14   21.00    8.10
   5  -3  14  116.09    7.70
   5  -2  14    6.60    7.30
   5  -1  14    1.30    7.80
   5   0  14   -0.90    7.60
   6   4  14   -7.80    6.80
   8   8  14  102.69    7.20
   9 -16  13   27.70   11.40
   7 -13  13   46.90   12.10
   6 -11  13   10.40   10.10
   5  -8  13  201.08    9.20
   4  -3  13   24.00    5.20
   4  -2  13    3.70    5.00
   5   3  13   76.99    6.90
   6   6  13   72.39    6.20
   7   8  13   47.70    6.20
   9 -17  12    3.10   10.70
   7 -14  12    8.20   11.50
   5 -10  12   28.80    8.20
   4  -7  12   28.00    7.70
   4   2  12  588.74    6.80
   5   5  12   42.30    5.50
   7   9  12   26.20    5.30
   7 -15  11   21.40   10.00
   5 -12  11   60.09    8.70
   4  -9  11   26.30    7.10
   3  -5  11   17.40    6.20
   3  -4  11   85.09    6.50
   3  -3  11  103.29    6.10
   3  -2  11  241.38    6.00
   3  -1  11   61.59    5.70
   3   0  11   -2.70    5.40
   4   4  11    5.50    4.60
   7  10  11   30.50    5.10
   7 -16  10   67.49   10.90
   5 -13  10   27.10    8.70
   4 -11  10   51.49    7.20
   3  -8  10  233.08    7.10
   3   3  10  235.98    3.80
   5   8  10   26.80    3.80
   7  11  10  134.29    4.30
  11  15  10    2.30    4.30
   9 -19   9   60.19   12.80
   8 -18   9    8.10   11.60
   7 -17   9   33.30    9.70
   5 -14   9   14.00    8.30
   4 -12   9   21.90    7.60
   2  -5   9  147.89    5.90
   2  -4   9  115.99    5.80
   2  -1   9  121.59    5.30
   2   0   9  329.17    5.10
   4   7   9   75.99    3.70
   6 -16   8   53.29    8.70
   4 -13   8   25.90    6.90
   3 -11   8   10.30    4.60
   2  -7   8   85.19    5.20
   2  -9   7  181.78    5.30
   2   4   7  529.15    3.70
   2 -10   6    9.90    4.80
   1  -6   6  189.78    3.60
   1   1   6   58.79    2.50
   1  -7   5  356.76    4.70
   3   8   5   63.19    1.40
   6 -18   4   10.60    7.00
  10  17   4    4.00    2.50
   5 -17   3  128.19    5.80
   3 -14   3   55.99    4.40
   3 -14   2  105.99    4.60
   2 -12   2    9.30    4.10
   0  -2   2   90.49    2.30
   4 -16   1   78.19    3.80
   4 -16   0    2.10    4.00
   4 -16  -1   79.99    3.50
   4  11  -2  118.79    3.50
   0  -3  -3    1.20    1.40
   0  -2  -3    5.80    1.80
  11  18  -3   13.70    7.40
   1   4  -4  237.48    3.70
   3   9  -4   12.00    3.60
   5  12  -4   10.00    4.30
   1   3  -5   24.50    2.80
   6  13  -5   33.20    5.20
   9  16  -5   89.19    7.20
  10  17  -5   46.90    8.40
   1   2  -6  716.23    4.10
   3   8  -6   -0.90    4.70
   4  10  -6  508.35    5.60
   7  14  -6   64.69    6.20
   8  15  -6   51.99    6.80
  12  18  -6   47.00   10.10
   2 -10  -7  252.27    2.50
   1   0  -7    1.80    2.90
   2   5  -7  689.23    6.00
   5  11  -7   19.30    5.80
  11  17  -7   21.60   10.00
   6 -17  -8   26.90    2.10
   2  -9  -8  123.19    3.20
   2   4  -8  225.28    5.70
   7  13  -8   37.20    7.40
   8  14  -8   26.20    8.00
   9  15  -8   28.60    9.00
  10  16  -8   22.30    8.90
   4 -13  -9   44.60    3.20
   2   2  -9   92.09    4.10
   4   8  -9   33.70    6.20
   6  11  -9    8.40    5.30
  12  17  -9    4.50   12.50
   7 -17 -10   45.80    4.00
   5 -14 -10   23.00    3.90
   4 -12 -10   11.90    3.30
   2  -5 -10   16.10    4.30
   2  -4 -10  124.59    4.40
   2  -3 -10    6.50    3.30
   2  -2 -10   56.29    3.50
   2  -1 -10   38.80    4.80
   2   0 -10 1244.08    7.20
   3   4 -10   44.10    4.40
   4   7 -10   30.10    6.40
   5   9 -10  239.88    7.70
   8  13 -10   61.69    9.30
   9  14 -10    9.50   10.30
  10  15 -10    3.90   10.50
   5 -13 -11   18.90    4.50
   4 -11 -11   17.20    4.70
   3  -8 -11   21.90    4.50
   3   3 -11  111.59    6.10
   4   6 -11   45.30    7.00
   5   8 -11  406.66    8.00
   7  11 -11  233.48    9.70
  11  15 -11   12.90   11.20
  12  16 -11    9.60   12.10
   5 -12 -12   16.00    5.30
   3  -5 -12   17.90    5.40
   3  -4 -12  258.47    5.90
   3  -3 -12   21.10    4.10
   3  -2 -12  349.37    4.90
   3  -1 -12   13.80    5.90
   3   0 -12    3.80    5.90
   4   4 -12  216.68    5.60
   5   7 -12   17.00    6.90
   7  10 -12   67.99    9.00
  12  15 -12    4.70   10.40
   4  -7 -13   19.70    5.80
   4   2 -13    0.90    7.00
   5   5 -13   81.79    6.00
   7   9 -13   27.00    9.10
   7 -13 -14    7.80    6.60
   6 -11 -14   27.20    6.70
   5  -8 -14   25.30    6.40
   5   3 -14  111.59    7.70
   6   6 -14    7.60    9.00
   7   8 -14   69.19   10.00
  10  12 -14   47.00   12.30
  11  13 -14   26.00   13.20
   6  -9 -15   34.80    7.80
   5  -5 -15   31.60    7.90
   5  -4 -15   -3.60    8.20
   5  -3 -15   36.10    7.70
   5  -2 -15  122.79    7.90
   5  -1 -15   11.90    8.10
   5   0 -15    3.30    8.10
   6   4 -15   52.39    9.40
   7   6 -15   66.49    7.40
   8   8 -15   10.60   10.20
  10  11 -15    8.10   12.90
  11  12 -15   21.50   13.70
   6  -6 -16   -3.90    8.70
   6  -5 -16    9.00    8.30
   6   0 -16  110.69    7.20
   6   1 -16    9.70    9.50
   7   4 -16  116.29    7.70
   8   6 -16   48.70    8.60
   9   8 -16   90.29   11.60
   7  -6 -17    8.10   10.50
   7   0 -17    5.10    8.10
   7   1 -17    7.10   10.70
   8   4 -17   30.00    8.60
   9   6 -17   79.79    9.60
  10   8 -17   31.30   14.70
  11   9 -17   27.70   11.60
   9  -9 -18   26.60   11.10
   8  -6 -18   10.20   11.70
   8  -5 -18   61.49    8.80
   8   0 -18   58.59    9.40
   8   1 -18  162.78   13.10
   9   4 -18    4.00   12.90
  10   6 -18    1.20   13.50
  11   8 -18    8.90   15.40
   9  -6 -19   41.30   12.00
   9  -5 -19   29.30   13.70
   9  -4 -19   73.19   12.60
   9  -3 -19   40.30   10.10
   9  -2 -19   33.10   10.10
   9  -1 -19   52.19   12.80
   9   0 -19    2.90   14.20
   9   1 -19   57.79   13.70
  10   3 -19   36.90   11.70
  10   4 -19   28.20   14.20
  11   5 -19   25.00   12.40
  10  -2 -20   35.00   16.20
  10  -1 -20    9.80   15.80
  11  -5  19   31.00   17.00
  11   0  19  -12.60   13.20
  11   1  19  -14.50   15.20
  10  -8  18   45.40   11.30
  10  -7  18   41.80   14.60
   9  -3  18    5.40   10.00
   9  -2  18   -0.40    9.20
  10   2  18   20.00   12.50
  10   3  18   53.39    9.10
  11   5  18   51.39   11.10
  10 -10  17   63.19   16.30
   9  -8  17   16.50   13.80
   8  -4  17   18.30    8.60
   8  -3  17   87.49   10.80
   8  -2  17    5.90   10.80
   8  -1  17    3.20    8.10
   9   3  17  126.59   10.60
  10   5  17   68.79   10.00
  11   7  17   21.80   11.10
  10 -12  16    5.90   15.40
   9 -11  16   10.10   10.70
   8  -8  16    5.30   11.90
   7  -5  16   17.20    7.70
   7  -4  16  127.49    9.70
   7  -3  16   21.60   10.40
   7  -2  16   44.60    9.90
   7  -1  16   33.90    9.10
   7   0  16    4.70    6.90
   8   3  16  121.19    9.00
   9   6  16   31.10    8.70
  11   9  16   11.60    9.00
  12  10  16   13.00   10.00
  10 -14  15   14.80   14.90
   8 -11  15   19.70    9.80
   7  -8  15   -2.00   10.60
   6  -4  15   41.70    6.90
   6  -3  15    5.60    8.60
   6  -2  15   81.39    8.20
   6  -1  15  103.49    6.30
   7   3  15   11.40    7.70
   8   6  15   10.70    8.50
  10   9  15   11.90    8.10
   9 -14  14    3.30   14.00
   7 -11  14  107.69    8.50
   6  -8  14   19.80    9.40
   6   3  14    7.70    7.60
   7   6  14    8.30    6.50
   9   9  14   24.30    7.00
   9 -15  13   42.40   14.40
   8 -14  13   26.20   11.60
   7 -12  13   78.49   11.70
   6 -10  13   52.39    9.80
   5  -7  13   95.09    8.50
   5   2  13   47.50    6.70
   8   9  13   15.60    6.30
   9 -16  12   11.60   13.00
   8 -15  12   13.90   12.20
   6 -12  12   17.20    7.20
   4  -6  12   83.99    5.60
   4  -5  12  166.38    7.50
   4   0  12 1077.79    7.90
   4   1  12   27.40    5.90
   6   7  12    5.60    5.40
   9 -17  11   66.19   13.40
   8 -16  11    7.60   12.20
   6 -13  11   15.80    9.40
   5 -11  11   84.39    8.40
   4  -8  11    3.30    6.70
  12  15  11   -4.50    5.60
   9 -18  10    3.80   12.50
   8 -17  10   42.80   10.90
   6 -14  10   77.09    9.40
   4 -10  10  150.68    7.80
   3  -7  10  358.26    5.70
   3   2  10   83.89    4.80
   8  12  10  105.49    4.40
   9  13  10  127.19    4.90
  10  14  10    5.20    4.50
   6 -15   9  126.39    9.40
   3  -9   9  164.18    5.20
   2  -3   9  278.07    4.50
   2  -2   9   92.19    4.00
   3   4   9   22.60    3.80
   8 -18   8   26.60   10.00
   7 -17   8  107.79   10.10
   3 -10   8  197.28    6.20
   2  -6   8   11.70    5.40
   2   2   8   97.99    3.10
   6  11   8   35.60    3.00
  11  16   8   10.20    3.10
   5 -15   7  106.09    7.60
   3 -11   7    5.00    5.70
   2  -8   7   16.50    5.00
   9 -20   6   13.30   11.60
   4 -14   6    4.70    6.30
   3 -12   6   41.10    5.60
   1  -5   6  234.58    3.70
   1  -4   6  184.18    4.50
   1  -1   6   74.99    3.60
   1   0   6   -2.80    2.40
   1   2   5  246.28    2.20
   8 -20   4   -3.70    8.60
   7 -19   4  121.49    7.90
   4 -15   4   -4.40    5.10
   1   3   4  214.68    2.10
   6 -18   3   61.69    6.40
  11  18   3   11.20    3.70
   5 -17   2   82.79    5.00
   1  -9   2  524.15    3.50
   4  11   2  123.99    1.60
   3 -14   1  244.48    4.20
   2 -12   1  138.49    3.70
   1   5   0  107.69    1.50
   7  15   0   40.60    3.90
   8  16   0  113.79    4.30
  12  19   0    2.70    6.40
   1   5  -1  140.89    1.90
   7  15  -1   52.69    4.40
   8  16  -1   94.59    5.10
  12  19  -1    8.00    7.80
   0   0  -2   10.40    1.80
   1   5  -2   84.29    2.20
   7  15  -2    4.90    5.20
   8  16  -2   52.19    5.50
  12  19  -2   11.90    8.10
   3 -14  -3   46.70    2.00
   0  -4  -3   -1.70    1.20
   0  -1  -3    1.40    2.20
   4  11  -3   76.29    3.90
   2   7  -4   50.89    3.50
   4  11  -4  171.48    4.90
  11  18  -4   -0.20    7.70
   8 -20  -5    0.60    3.50
   7 -19  -5   24.20    3.00
   5  12  -5   10.10    5.00
  11  18  -5   18.00    8.90
   2 -11  -6    5.60    1.50
   1   3  -6  368.86    4.50
   2   6  -6   56.79    3.30
   6  13  -6   80.09    6.00
   9  16  -6   78.79    7.90
  10  17  -6   17.90    8.90
   1  -6  -7  261.77    2.90
   1   1  -7  387.86    3.80
   3   8  -7   49.30    4.90
  12  18  -7    0.40   10.40
   4 -14  -8   28.20    2.50
   3 -12  -8   77.49    2.80
   1  -4  -8  331.57    4.20
   1  -3  -8   75.79    3.80
   1  -2  -8  241.28    4.50
   1  -1  -8  145.79    4.60
   3   7  -8  309.87    5.70
   4   9  -8  490.25    6.40
   6  12  -8   52.79    6.40
  11  17  -8   46.10   10.90
   5 -15  -9   41.90    3.10
   3 -11  -9   83.89    3.40
   2  -8  -9  208.38    3.70
   2   3  -9  303.77    5.80
   3   6  -9  212.58    4.40
   5  10  -9   72.79    6.70
   7  13  -9   10.60    7.40
   8  14  -9  125.19    9.00
   9  15  -9   14.60    9.60
   3 -10 -10   14.10    4.00
   2  -6 -10  109.99    4.50
   2   1 -10   38.80    5.60
   3   5 -10  359.46    6.40
   6  11 -10    7.30    8.00
   7  12 -10   33.60    6.20
  11  16 -10   42.90   11.90
   6 -15 -11    2.20    4.50
   6  10 -11   -1.00    7.60
   6 -14 -12    6.10    5.30
   4 -10 -12   46.40    5.00
   3  -6 -12  215.68    5.60
   3   1 -12    4.80    6.40
   4   5 -12  163.78    7.60
   6   9 -12   34.40    6.00
   8  12 -12   14.90   10.30
   9  13 -12    1.70   11.10
  10  14 -12   90.29   12.80
  11  15 -12   64.89   12.50
   8 -16 -13    4.70    6.80
   6 -13 -13   -1.80    6.30
   5 -11 -13   36.00    6.50
   4  -8 -13    9.50    5.80
   4   3 -13   34.00    7.10
   5   6 -13   96.39    8.40
   6   8 -13   38.80    8.80
   8  11 -13   18.90   10.80
   9  12 -13  101.09    8.90
  10  13 -13    7.80    9.50
  11  14 -13   47.70   13.10
   8 -15 -14   14.50    7.60
   5  -9 -14   79.69    6.80
   4  -5 -14  120.59    6.90
   4  -4 -14  281.77    7.60
   4  -3 -14   42.60    5.50
   4  -2 -14   26.00    5.30
   4  -1 -14  325.57    7.70
   4   0 -14  131.59    7.90
   5   4 -14   20.60    6.00
   6   7 -14   25.20    9.00
   8  10 -14   71.19   11.80
   9  11 -14    8.20    9.20
   7 -12 -15   39.80    7.40
   6 -10 -15   20.30    7.40
   5  -7 -15   90.99    7.00
   5  -6 -15  111.59    7.30
   5   1 -15    0.20    6.10
   5   2 -15  135.39    9.20
   6   5 -15   99.39    9.90
   7   7 -15   49.30    9.50
   8   9 -15   20.80   11.60
   9  10 -15  138.39   12.60
   8 -12 -16   43.70    9.00
   7 -10 -16   79.49    9.10
   6  -7 -16    5.80    9.10
   6   2 -16   48.40    7.40
   6   3 -16    9.80    9.10
   7   5 -16    6.30    8.10
   8   7 -16   17.20    8.50
   9   9 -16    4.60   13.90
  10  10 -16   37.90   14.00
  11  11 -16   17.20   11.40
   8 -10 -17   16.80    9.50
   7  -8 -17   11.50    9.00
   7  -7 -17   73.99    7.40
   7   2 -17    4.80    7.60
   7   3 -17    3.30   11.10
   8   5 -17    1.80    8.60
   9   7 -17    7.50    9.80
  10   9 -17   -0.10   15.90
  11  10 -17   18.10   16.90
   9 -10 -18   12.70   12.10
   8  -8 -18   39.00   10.40
   8  -7 -18   50.69    8.60
   8   2 -18    0.40    9.50
   8   3 -18   59.19   12.70
   9   5 -18    0.90   10.00
  10   7 -18   37.40   13.90
   9  -7 -19   13.40   13.00
   9   2 -19   28.10   13.90
   9   3 -19   27.40   13.60
  10   5 -19   11.10   15.40
  10   0 -20   68.39   12.10
  10   1 -20   28.20   15.60
  10   2 -20   38.70   17.10
  11  -4  19    7.40   12.40
  11  -3  19   12.20   11.70
  11  -2  19   37.60   11.40
  11  -1  19    0.40   10.90
  12   2  19   35.60   15.60
  11  -8  18   25.90   15.50
  10  -6  18   14.90   10.50
  10  -5  18   16.70   14.50
  10  -4  18  109.39   14.10
  10  -3  18   43.30   13.20
  10  -2  18   16.90   12.70
  10  -1  18    6.50   13.00
  10   0  18   11.40   12.60
  10   1  18   -1.90   12.00
  11   4  18   38.90   11.40
  12   6  18    7.80   11.80
  10  -9  17    1.80   14.50
   9  -7  17    9.40    9.60
   9  -6  17   85.39   13.10
   9  -5  17   89.29   11.70
   9   1  17    9.20   10.90
   9   2  17   24.40    9.90
  10   4  17   23.20   10.20
  11   6  17   35.40   10.40
  12   8  17    0.00   10.10
  10 -11  16   26.70   14.60
   9 -10  16    4.90   10.40
   9  -9  16   11.10   11.70
   8  -7  16   37.80   10.60
   8  -6  16   58.49   10.90
   8   2  16  169.58    9.80
   9   5  16   56.99   10.00
  10   7  16   24.60    9.30
  10 -13  15    6.00   15.50
   9 -12  15   96.39   10.90
   8 -10  15    7.60    9.10
   7  -7  15   40.00   10.00
   7  -6  15   96.69    9.80
   7   2  15   72.29    8.70
   8   5  15    7.10    8.20
   9   7  15   33.10    8.40
  11  10  15   29.10    8.40
  12  11  15   78.29    9.20
   9 -13  14   46.80   14.00
   8 -12  14   33.10    9.80
   7 -10  14   41.20    8.10
   6  -7  14   20.30    6.80
   6  -6  14   18.20    8.70
   6   2  14   30.90    7.60
   7   5  14   96.29    7.30
   8   7  14   35.80    7.30
  10  10  14   62.69    7.40
  11  11  14  126.79    8.40
  12  12  14    0.40    8.30
   8 -13  13  139.39   12.90
   6  -9  13   53.49    9.50
   5  -6  13  101.79    6.20
   5  -5  13   72.19    8.40
   5   1  13   91.69    7.00
   6   5  13  203.88    5.10
   7   7  13   14.00    6.20
   9  10  13    2.50    6.20
  12  13  13   34.10    7.70
   7 -13  12   57.49   10.30
   6 -11  12    1.70    9.60
   5  -9  12   72.29    6.10
   4  -4  12  222.28    5.60
   4  -3  12  138.69    7.10
   4  -2  12  603.24    7.80
   4  -1  12   18.20    6.50
   5   4  12  141.69    5.90
   8  10  12   51.89    5.30
   9  11  12   60.29    6.10
  12  14  12   38.80    7.00
   7 -14  11  100.49   10.50
   5 -10  11   33.70    7.60
   4  -7  11   43.90    7.10
   4   3  11  229.78    5.40
   5   6  11  296.17    5.20
   6   8  11   38.10    4.40
   8  11  11   70.49    4.60
   9  12  11   10.80    5.30
  11  14  11   -2.30    5.20
   7 -15  10   11.20    9.90
   5 -12  10   43.60    6.00
   4  -9  10   59.89    6.90
   3  -6  10   69.09    4.80
   3  -5  10  398.56    6.80
   3   1  10   59.29    5.00
   4   5  10  208.38    4.80
   6   9  10   29.30    4.40
   9 -18   9   53.79   11.50
   8 -17   9   27.40   11.10
   7 -16   9   38.10   10.40
   5 -13   9  228.18    7.90
   4 -11   9   85.19    5.40
   3  -8   9  640.94    7.20
   6  10   9  106.09    3.90
   9 -19   8    0.90   11.10
   5 -14   8   11.70    5.60
   4 -12   8    8.50    7.10
   2  -5   8   92.69    5.50
   2   1   8  400.26    4.70
   3   5   8   26.90    3.20
   6 -16   7    7.20    8.30
   4 -13   7   38.30    5.10
   2   3   7  274.77    3.60
   5  10   7   41.30    2.50
   2  -9   6  102.59    3.60
   1  -3   6  343.97    3.60
   1  -2   6  725.23    4.10
   3   7   6  397.96    2.70
   4   9   6   45.70    2.20
   6 -17   5    5.90    7.40
   2 -10   5  205.58    3.60
   1  -6   5  137.59    3.20
   5 -16   4   38.60    6.90
   1  -7   4   18.60    3.80
   8 -20   3    0.80    7.90
   7 -19   3    0.80    7.00
   4 -15   3   66.89    4.80
   2 -11   3  156.28    4.20
   9 -21   2   75.39    9.40
   8 -20   2   21.80    8.30
   6 -18   2   20.90    6.50
   5 -17   1   55.49    4.40
   1  -9   1  268.77    2.90
   7  15   1   48.30    3.30
   8  16   1   95.99    4.00
  12  19   1   10.00    5.40
   5 -17   0   52.69    4.40
   3 -14   0   11.20    3.30
   2 -12   0    5.60    2.80
   6  14   0    0.00    3.60
   9  17   0   49.40    4.70
   3 -14  -1  250.67    3.40
   2 -12  -1  139.59    2.50
   6  14  -1   11.20    3.60
   9  17  -1   87.69    5.70
   3 -14  -2   90.39    2.50
   2 -12  -2    6.60    1.80
   6  14  -2   38.00    4.00
   9  17  -2   31.60    6.00
   5 -17  -3  133.49    3.40
   1   5  -3  192.88    3.20
   6  14  -3   47.90    5.00
   7  15  -3    2.20    4.90
   8  16  -3    2.50    5.20
   9  17  -3  100.49    7.00
  12  19  -3   -3.50    7.60
   0  -2  -4  232.68    2.60
   7  15  -4  182.88    6.30
   8  16  -4   45.00    7.00
  12  19  -4   68.29    9.40
   1   4  -5  252.97    4.10
   2   7  -5  159.38    4.40
   3   9  -5  179.68    3.40
   4  11  -5   26.20    4.30
   1  -8  -6  114.19    2.10
   5  12  -6   13.00    5.70
  11  18  -6   86.79   10.30
   1   2  -7   90.19    3.40
   2   6  -7  154.38    5.10
   4  10  -7    3.30    5.50
   6  13  -7   28.30    6.50
   7  14  -7   26.80    6.60
   8  15  -7   57.99    7.20
   9  16  -7   32.00    8.70
  10  17  -7   10.10   10.20
   1  -5  -8  119.29    3.40
   1   0  -8    1.10    3.20
   2   5  -8   88.89    5.40
   5  11  -8    7.60    6.40
   2   4  -9  124.19    5.80
   3   7  -9   41.10    5.60
   4   9  -9    2.40    6.40
   6  12  -9  100.19    7.80
  10  16  -9   13.90    9.60
  11  17  -9   20.10   10.50
   6 -16 -10   21.40    4.00
   2  -7 -10   80.49    4.20
   2   2 -10   55.89    4.10
   3   6 -10   83.79    6.10
   4   8 -10  131.69    7.10
   5  10 -10  114.89    7.60
   3  -9 -11   35.10    4.10
   2  -4 -11  194.08    5.20
   2  -3 -11   52.09    5.00
   2  -2 -11  419.46    6.10
   2  -1 -11  120.99    5.90
   3   4 -11   69.59    4.40
   4   7 -11   34.10    7.10
   5   9 -11  144.59    8.00
   7  12 -11   31.90    8.80
   8  13 -11   77.39    9.10
   9  14 -11   38.10   10.40
  10  15 -11   13.20   11.60
  11  16 -11   20.90   12.40
   8 -17 -12    6.80    5.60
   3  -7 -12   61.89    5.20
   3   2 -12  342.07    5.70
   3   3 -12   38.30    6.50
   4   6 -12   91.79    7.40
   5   8 -12  112.89    8.10
   7  11 -12    5.90    6.90
   4  -9 -13  136.49    6.50
   3  -4 -13   39.60    6.10
   3  -3 -13   45.10    6.40
   3  -2 -13   21.60    6.50
   3  -1 -13   20.30    6.90
   4   4 -13   25.80    7.30
   5   7 -13   97.99    8.40
   7  10 -13   98.39    7.80
   6 -12 -14   43.50    6.30
   5 -10 -14   14.70    7.30
   4  -6 -14   80.39    6.80
   4   1 -14  338.07    6.40
   4   2 -14   24.60    7.60
   5   5 -14   74.29    6.60
   7   9 -14   88.99    7.90
   9  12 -14   58.99   12.10
  10  13 -14   76.29   14.10
  11  14 -14   19.80   13.90
   8 -14 -15   27.90    7.80
   5  -8 -15  297.87    7.70
   5   3 -15   25.40    9.50
   6   6 -15   99.29   10.10
   7   8 -15   -2.70   11.10
   9  11 -15   42.70   12.60
  10  12 -15   17.30   14.80
  11  13 -15    5.70   16.40
   7 -11 -16   20.00    8.40
   6  -8 -16    3.00    8.00
   5  -4 -16    5.40    8.00
   5  -3 -16    1.10    9.30
   5  -2 -16   22.70    9.20
   5  -1 -16   23.00    9.10
   6   4 -16    2.30   10.00
   7   6 -16  175.48    8.20
   8   8 -16  -10.20   11.30
  10  11 -16   24.60   15.20
   8 -11 -17   13.40   10.20
   7  -9 -17   33.20    9.20
   6  -5 -17   50.39   10.00
   6  -4 -17    3.50    9.40
   6  -3 -17   35.60    9.20
   6  -2 -17   20.20    7.40
   6  -1 -17  293.57   10.30
   6   0 -17  136.39   10.90
   6   1 -17  294.27   10.60
   7   4 -17    9.10   11.20
   8   6 -17   -0.30    9.20
   9   8 -17   17.20   13.10
   8  -9 -18    9.80   11.50
   7  -5 -18  101.49   11.30
   7  -4 -18   24.80    9.90
   7  -3 -18   31.90    8.40
   7  -2 -18   74.59    8.70
   7  -1 -18    3.40    8.90
   7   0 -18    1.80   12.00
   7   1 -18    6.20   12.30
   8   4 -18   11.40   12.10
   9   6 -18   -1.90   10.40
  10   8 -18   42.00   16.60
   8  -5 -19   16.80   12.80
   8  -4 -19   55.79   13.20
   8  -3 -19    7.40   11.60
   8  -2 -19   15.20    9.30
   8  -1 -19   23.80   12.10
   8   0 -19   20.20   13.60
   8   1 -19   37.90   13.30
   9   4 -19   78.79   14.60
  10   6 -19   23.40   15.60
   9  -5 -20    4.90   13.50
   9  -4 -20   18.80   15.20
   9  -3 -20   20.70   15.20
   9  -2 -20   -8.80   14.60
   9  -1 -20    1.30   14.60
   9   0 -20    5.10   14.20
  12  -2  19   50.19   16.00
  12  -1  19   -0.70   16.10
  12   0  19   58.79   15.60
  12   1  19    2.10   11.20
  11  -7  18   13.90   11.30
  11  -6  18   -1.80   15.60
  11   2  18   44.00   13.80
  11   3  18   38.00    9.70
  12   5  18    8.70   11.50
  11 -10  17   43.00   15.20
  10  -8  17   41.00   13.10
  10  -7  17   34.60   12.80
   9  -4  17   39.50   11.40
   9  -3  17  127.29   12.40
   9  -2  17   35.20   11.80
   9  -1  17   15.80   12.00
   9   0  17    5.50    8.60
  10   3  17  146.09   11.60
  12   7  17    5.80   11.70
  10 -10  16   43.10   13.70
   9  -8  16  113.69   12.40
   8  -5  16   53.09   10.20
   8  -4  16  137.39   10.90
   8  -3  16  126.59   10.70
   8  -2  16  157.98   10.30
   8  -1  16  111.49   10.40
   8   0  16  221.78   10.40
   8   1  16   86.09    7.30
   9   4  16   -1.10    9.90
  10   6  16   23.10    9.80
  11   8  16    9.50    9.10
  12   9  16   14.50   10.30
  10 -12  15   20.90   13.70
   9 -11  15   46.40   10.20
   8  -9  15   17.70    8.60
   8  -8  15   10.50   10.30
   7  -5  15   11.50    9.50
   7  -4  15  119.29    9.60
   7  -3  15    4.10    8.90
   7  -1  15   16.70    8.40
   7   0  15    6.60    8.70
   7   1  15   17.90    8.10
   8   4  15  104.59    8.00
  10   8  15    4.40    8.60
  10 -14  14   24.30   13.70
   8 -11  14   17.10   11.20
   7  -9  14  105.69    7.70
   7  -8  14   78.69    9.30
   6  -5  14   14.90    6.10
   6  -4  14   -7.40    8.40
   6  -3  14   17.70    8.10
   6  -2  14   18.90    7.50
   6  -1  14    1.80    7.90
   6   0  14  123.39    8.00
   6   1  14    6.10    5.50
   7   4  14   -3.70    7.60
  10 -15  13   12.90   14.90
   9 -14  13   15.40   12.90
   7 -11  13   11.10    8.20
   6  -8  13   54.99    9.20
   5  -4  13   57.99    5.70
   5  -3  13   72.19    7.00
   5  -2  13   51.89    6.90
   5  -1  13   89.89    7.00
   5   0  13   -1.10    5.00
   6   4  13  216.58    7.30
  10  11  13   19.00    6.40
  11  12  13   32.10    6.80
  10 -16  12    3.70   13.40
   9 -15  12   26.50   13.00
   8 -14  12    0.50    8.70
   7 -12  12   55.99   10.30
   6 -10  12   11.00    9.00
   5  -8  12   98.29    6.10
   5  -7  12    9.30    7.70
   5   3  12   49.10    5.70
   6   6  12   39.80    5.50
   7   8  12   41.00    5.40
  10  12  12  112.29    6.70
  11  13  12   48.60    6.80
  10 -17  11    5.70   12.90
   9 -16  11   46.60   13.10
   8 -15  11   24.20   11.40
   6 -12  11   12.80    6.80
   4  -6  11   46.30    7.00
   4   2  11   16.00    5.20
  10  13  11   57.99    5.20
   9 -17  10   -2.80   12.20
   8 -16  10   14.20   10.40
   6 -13  10   32.40    9.30
   5 -11  10   19.60    7.90
   3  -4  10   50.89    4.40
   3  -3  10  260.67    6.20
   3  -2  10   96.59    5.80
   3  -1  10   57.59    5.60
   3   0  10   -3.20    3.70
   5   7  10   84.89    4.20
   6 -14   9    4.20    8.70
   4 -10   9    7.00    6.80
   3  -7   9   37.80    5.70
   3   3   9  176.78    3.40
   4   6   9   33.50    3.90
   5   8   9  111.19    4.20
  12  16   9    4.10    4.40
   6 -15   8   36.90    7.70
   3  -9   8   90.09    4.40
   2  -4   8  193.08    4.30
   2  -3   8  152.08    5.40
   2  -2   8  118.89    5.10
   2  -1   8  401.46    5.40
   2   0   8  145.59    3.50
   7  12   8   73.49    3.40
   9 -19   7   23.50   11.00
   8 -18   7    1.30   10.10
   7 -17   7  166.28    9.30
   5 -14   7   80.99    7.20
   3 -10   7  497.95    6.50
   2  -7   7  311.17    4.20
   3   6   7    5.20    2.50
   4 -13   6   77.09    6.00
   3 -11   6  117.99    5.30
   2  -8   6  188.58    4.90
   2   4   6  361.06    3.00
   6  12   6   61.69    2.00
   9 -20   5   24.90    9.90
   8 -19   5    2.40    9.10
   7 -18   5   45.60    8.10
   1  -5   5   86.59    3.90
   1   1   5  124.59    2.30
   2   6   4    3.30    1.30
   3 -13   3   15.20    4.20
   7 -19   2   59.29    6.70
   4 -15   2   38.50    4.70
  12  19   2    7.50    4.80
   9 -21   1   -0.80    7.20
   8 -20   1    4.30    7.50
   7 -19   1    1.50    6.60
   6 -18   1   10.30    5.70
   6  14   1    8.80    3.00
   9  17   1   83.89    4.10
   9 -21   0    0.60    7.60
   0  -4   0 2691.23    2.90
   5 -17  -1   61.19    4.20
   2   8  -1   39.20    2.40
   3  10  -1  195.18    3.10
   5  13  -1   73.79    3.50
  10  18  -1   11.20    5.60
   5 -17  -2   78.19    3.40
   2   8  -2  202.58    2.80
   3  10  -2    0.80    2.80
   5  13  -2    4.60    3.50
  10  18  -2   38.00    6.90
   0   0  -3    1.40    1.80
   2   8  -3  249.58    3.20
   3  10  -3   81.49    3.80
   5  13  -3    2.40    4.80
   6 -18  -4   11.40    3.20
   0  -3  -4  171.58    2.10
   0  -1  -4  532.35    3.30
   1   5  -4  318.47    3.80
   6  14  -4    9.10    4.80
   9  17  -4   31.40    6.40
   7  15  -5   86.59    6.40
   8  16  -5   24.40    6.60
  12  19  -5    6.00    9.60
   1   4  -6  168.98    4.50
   2   7  -6   31.40    4.50
   3   9  -6  232.98    4.80
   4  11  -6  172.58    5.10
   1  -7  -7   47.90    2.30
   1   3  -7  403.46    5.10
   5  12  -7  103.39    6.40
  11  18  -7    7.90    9.40
   1  -6  -8  196.88    3.50
   1   1  -8  142.79    3.70
   3   8  -8   57.79    5.60
   4  10  -8  122.69    5.90
   6  13  -8   56.79    6.80
   7  14  -8    9.50    7.70
   8  15  -8   32.80    8.60
   9  16  -8   46.10    9.10
   2  -9  -9   21.50    3.50
   1  -3  -9  111.79    4.40
   1  -2  -9  719.93    5.50
   1  -1  -9   15.50    4.80
   5  11  -9  166.18    7.80
   2   3 -10    2.60    5.60
   7  13 -10   28.00    8.60
   8  14 -10   37.00    9.20
   9  15 -10   16.20    9.60
  10  16 -10   -0.50   11.10
   4 -12 -11    5.10    4.30
   2  -5 -11   43.80    4.80
   2   0 -11  449.56    4.90
   2   1 -11  114.09    5.70
   3   5 -11   21.60    4.80
   6  11 -11  108.19    8.60
   7 -16 -12    8.20    5.30
   5 -13 -12   27.40    5.20
   3  -8 -12  230.58    5.30
   3   4 -12  310.47    7.20
   6  10 -12   13.10    6.20
   8  13 -12   61.59   10.60
   9  14 -12   38.00   12.20
  10  15 -12    8.00   11.80
   7 -15 -13   24.10    6.10
   3  -5 -13   75.99    6.20
   3   0 -13   -8.20    5.10
   3   1 -13   24.10    7.00
   4   5 -13   81.89    8.10
   6   9 -13   43.30    6.80
   7  11 -13   23.70   10.00
   8  12 -13   61.99   10.80
   9  13 -13   34.40    9.00
  10  14 -13   -9.00   10.10
  11  15 -13    7.50   14.60
   7 -14 -14   94.59    6.70
   4  -7 -14  108.19    6.70
   4   3 -14   42.20    7.90
   5   6 -14   20.70    8.80
   6   8 -14    1.70    9.30
   7  10 -14   40.80   11.00
   8  11 -14   -1.60    8.60
   7 -13 -15    1.20    8.00
   6 -11 -15   41.90    7.50
   4  -4 -15   24.60    7.80
   4  -3 -15   80.29    8.10
   4  -2 -15    8.00    8.10
   4  -1 -15    0.20    8.10
   4   0 -15   26.40    7.50
   5   4 -15    1.30    8.70
   6   7 -15   33.00    9.80
   8  10 -15   12.10   11.60
   8 -13 -16   10.90    8.70
   6  -9 -16   11.40    8.50
   5  -6 -16   27.10    7.80
   5  -5 -16   21.20    7.80
   5   0 -16    4.20    6.50
   5   1 -16    7.60    9.40
   5   2 -16   18.40    9.10
   6   5 -16   -8.50   10.70
   7   7 -16   17.40   10.30
   8   9 -16   73.89   12.80
   9  10 -16    5.60   10.10
   6  -7 -17   29.70    8.90
   6  -6 -17   85.69    9.50
   6   2 -17   19.20   10.30
   7   5 -17   15.70   10.90
   8   7 -17   37.10    9.40
   9   9 -17   18.40   14.90
  10  10 -17   42.90   12.50
   8 -10 -18   42.10   11.70
   7  -7 -18  106.59   11.30
   7  -6 -18    7.80    8.00
   7   2 -18   74.69    9.20
   7   3 -18   33.80   11.80
   8   5 -18   53.49    9.70
   9   7 -18   47.80   10.30
  10   9 -18   -0.20   17.00
   8  -7 -19    4.80   12.30
   8  -6 -19    3.60   11.40
   8   2 -19   16.80   12.70
   8   3 -19   12.30   13.60
   9   5 -19   18.50   13.80
   9   1 -20   -1.20   11.70
   9   2 -20    6.20   17.30
  11  -5  18   53.69   11.40
  11  -4  18   34.20   15.00
  11  -3  18   34.50   14.20
  11  -2  18   43.50   14.90
  11  -1  18   -1.20   13.90
  11   0  18   -2.90   13.20
  11   1  18    9.40    9.80
  12   3  18   61.79   12.70
  12   4  18   47.80    9.80
  11  -9  17   24.70   12.10
  11  -8  17   14.40   13.70
  10  -6  17   -1.80   13.20
  10  -5  17   71.89   12.30
  10   1  17   67.69   11.10
  10   2  17   59.29   11.40
  11   5  17    1.20   10.20
  11 -11  16    8.70   16.50
  10  -9  16   19.10   13.80
   9  -7  16   47.00   11.60
   9  -6  16   37.70   10.90
   9   3  16    5.50    9.50
  10   5  16   11.40    9.50
  11   7  16    9.90   10.20
  11 -13  15   18.10   14.70
   9 -10  15  141.19    9.30
   8  -7  15    5.00   10.70
   7  -2  15   66.29    6.70
   8   3  15   36.10    8.40
   9   6  15  107.59    8.00
  11   9  15   13.30    9.10
  12  10  15   18.60    8.50
  13  11  15   47.30   10.40
  10 -13  14   88.89   14.20
   9 -12  14   62.29    9.50
   8 -10  14   55.79   10.40
   7  -7  14   86.89    9.80
   7   3  14   51.49    7.80
   8   6  14   36.90    7.40
   9   8  14   62.69    6.80
   9 -13  13   36.50   12.20
   8 -12  13   55.99    8.60
   7 -10  13  131.89    7.80
   6  -7  13   56.69    8.80
   6   3  13  105.59    7.30
   7   6  13   37.40    6.40
   8   8  13    4.10    6.20
   8 -13  12   66.79   11.90
   6  -9  12   50.49    8.20
   5  -6  12  118.79    7.90
   5   2  12   18.30    6.00
   7 -13  11   73.59    9.40
   6 -11  11  116.19    8.80
   5  -9  11  121.19    6.20
   4  -5  11   47.10    5.00
   4  -4  11    3.80    6.00
   4   0  11  499.55    6.60
   4   1  11   34.50    4.10
   5   5  11  293.27    5.20
   6   7  11    4.90    5.40
   7   9  11   27.80    4.90
   7 -14  10   51.29    9.50
   4  -8  10  106.29    5.60
   4   4  10  114.29    3.40
   7  10  10   26.00    4.60
  13  16  10    3.40    5.30
   7 -15   9   45.30    9.70
   5 -12   9    0.70    5.50
   3  -6   9  226.98    5.90
   3   2   9   94.59    4.40
   7  11   9   11.20    3.70
  10 -19   8   -1.70   12.40
   9 -18   8   31.60   11.60
   8 -17   8   39.50   10.20
   7 -16   8   41.00    7.00
   5 -13   8    2.00    5.20
   4 -11   8  242.18    5.30
   3  -8   8   55.99    5.70
   3   4   8  225.18    3.90
   4   7   8   75.99    3.10
   5   9   8    4.30    2.70
  10  15   8   30.30    3.40
   4 -12   7    6.70    5.90
   2  -6   7  134.19    3.80
   2   2   7  551.84    4.40
   4   8   7   58.69    2.70
   2  -9   5  132.59    3.40
   1  -4   5  239.18    3.20
   1  -3   5   19.90    3.70
   1  -1   5  146.99    3.60
   1   0   5   -0.40    2.50
   2   5   5  278.57    2.20
   9 -20   4   14.90    9.50
   8 -19   4    4.30    8.50
   7 -18   4    6.40    7.50
   6 -17   4    8.30    6.70
   1  -6   4   28.20    3.30
   1   2   4  370.26    2.70
   5 -16   3  102.19    5.60
   3 -13   2   43.50    4.50
   2 -11   2   83.39    3.40
   7  15   2    7.00    2.70
   8  16   2   52.89    3.20
   8 -20   0    2.90    6.60
   7 -19   0   79.39    5.90
   6 -18   0    7.00    5.10
   1  -9   0   13.90    1.60
   2   8   0  315.27    2.20
   3  10   0  150.68    2.30
   5  13   0   10.80    2.80
  10  18   0   -2.50    5.00
   9 -21  -1    1.60    6.90
   6 -18  -1    4.10    4.60
   9 -21  -2   61.79    6.70
   0   1  -2 9884.71    6.60
   6 -18  -3   52.79    4.00
   0   1  -3    1.40    2.80
  10  18  -3   13.60    6.70
   8 -20  -4    6.30    4.40
   7 -19  -4  117.69    4.00
   0  -4  -4   87.09    1.70
   0   0  -4 1184.78    3.50
   2   8  -4  107.79    3.80
   3  10  -4  657.33    4.80
   5  13  -4   49.00    4.60
  10  18  -4   61.69    7.30
   0  -3  -5    1.50    2.30
   0  -2  -5    6.10    2.60
   0  -1  -5    3.10    2.90
   1   5  -5   93.49    4.20
   5  13  -5   67.69    5.70
   6  14  -5   42.50    5.20
   9  17  -5   91.49    7.50
   6  14  -6   14.20    5.90
   7  15  -6   38.10    6.70
   8  16  -6   37.50    7.30
   9  17  -6   80.19    8.70
   3 -13  -7   46.00    1.90
   2   7  -7  344.17    5.10
   3   9  -7  255.87    5.50
   2 -10  -8   12.80    2.60
   1   2  -8  230.98    3.90
   2   6  -8   14.90    3.70
   5  12  -8   51.49    6.90
  10  17  -8   17.00    9.30
  11  18  -8    5.80   11.40
   1  -4  -9  218.48    4.30
   1   0  -9    5.20    3.40
   1   1  -9   24.70    4.90
   2   5  -9  138.29    4.40
   3   8  -9  637.84    7.10
   7  14  -9   14.10    8.30
   8  15  -9    6.50    8.90
   9  16  -9   49.70    9.70
   4 -13 -10   -0.20    3.60
   3 -11 -10   90.19    4.30
   2  -8 -10   24.90    3.70
   2   4 -10  130.49    6.20
   3   7 -10  372.66    7.30
   4   9 -10   52.29    6.80
   6  12 -10   29.00    5.80
  11  17 -10   -3.20   11.40
   8 -18 -11    6.50    4.40
   5 -14 -11   30.10    4.40
   3 -10 -11   67.19    4.60
   2  -6 -11  147.39    4.90
   2   2 -11  451.65    5.30
   3   6 -11   26.10    6.80
   4   8 -11    4.50    5.40
   5  10 -11   41.90    7.90
   7  13 -11   65.49    9.10
   8  14 -11   37.40   10.30
   9  15 -11   48.40   11.40
  10  16 -11    8.10   10.90
   4 -11 -12   11.80    4.70
   2  -3 -12  246.58    6.00
   2  -2 -12   33.70    5.80
   2  -1 -12   49.99    5.90
   4   7 -12   27.10    5.30
   5   9 -12   64.49    6.20
   6  11 -12   -2.20    8.80
   7  12 -12   54.99    7.20
   6 -14 -13    9.50    5.70
   5 -12 -13   67.79    5.20
   4 -10 -13    4.70    5.40
   3  -6 -13   72.69    5.80
   3   2 -13   20.90    5.20
   3   3 -13   53.79    7.10
   4   6 -13   51.29    7.90
   5   8 -13  186.68    7.10
   6  10 -13   49.50    9.80
   6 -13 -14   12.10    7.10
   5 -11 -14   29.90    6.80
   4  -8 -14   16.90    6.70
   3  -3 -14   31.20    7.00
   3  -2 -14   21.00    7.20
   3  -1 -14   53.49    7.10
   4   4 -14  289.67    8.40
   5   7 -14   74.09    9.40
   6   9 -14   35.10   10.40
   8  12 -14   33.40   11.50
   9  13 -14   32.70   12.90
  10  14 -14   25.40   15.20
   5  -9 -15   58.69    7.40
   4  -6 -15   80.59    6.80
   4  -5 -15   24.30    7.20
   4   1 -15    5.90    6.20
   4   2 -15    9.90    8.70
   5   5 -15   35.30    6.90
   7   9 -15   41.10    8.20
   8  11 -15    9.20   12.00
   9  12 -15   72.89   14.20
  10  13 -15   15.20   15.10
   7 -12 -16   48.70    8.20
   6 -10 -16    4.90    8.10
   5  -7 -16   25.50    8.60
   5   3 -16   17.50    9.50
   6   6 -16    4.30   10.60
   7   8 -16  155.98   12.10
   9  11 -16    7.00   14.40
  10  12 -16    8.20   13.90
   8 -12 -17   19.40   10.00
   7 -10 -17    3.70    8.90
   6  -8 -17   51.49    8.70
   6   3 -17   27.80    8.20
   6   4 -17   11.60   11.40
   7   6 -17    5.40    8.80
   8   8 -17    8.90   12.50
   9  10 -17   20.70   14.10
  10  11 -17   17.60   16.20
   7  -8 -18    3.50   11.00
   6  -4 -18   15.00    9.50
   6  -3 -18    7.80   10.60
   6  -2 -18    7.40   11.40
   6  -1 -18   55.49   11.60
   6   0 -18    8.50   11.70
   7   4 -18   12.60   12.10
   8   6 -18   -1.00    9.90
   9   8 -18   18.20   14.20
   8  -8 -19    2.90   12.60
   7  -4 -19    4.50   13.00
   7  -3 -19    7.90   12.30
   7  -2 -19    2.50   12.70
   7  -1 -19    8.10   12.90
   7   0 -19   -3.10   12.90
   7   1 -19   10.90   12.40
   8   4 -19   34.00   14.10
   9   6 -19   28.70   11.20
   8  -4 -20   18.00   13.30
   8  -3 -20  -10.30   15.30
   8  -2 -20    3.70   14.30
   8  -1 -20   10.00   14.60
   8   0 -20   48.60   15.20
   9   3 -20   22.50   12.00
   9   4 -20    6.40   16.80
  12  -6  18    5.40   15.30
  12  -5  18   18.10   16.50
  12   1  18    9.40   12.90
  12   2  18   29.60   14.10
  13   4  18   20.70   13.30
  12  -9  17   48.70   16.20
  11  -7  17   58.89   14.20
  10  -4  17   26.40    9.50
  10  -3  17  116.29   12.40
  10  -2  17   62.29   12.90
  10  -1  17   86.49   12.70
  10   0  17   55.89   11.20
  11   3  17   16.60   11.10
  11   4  17   21.80    8.60
  12   6  17   -0.80    8.70
  13   7  17   34.00   12.40
  11 -10  16   66.49   15.70
  10  -8  16   23.40   13.10
   9  -5  16   49.30   11.20
   9  -4  16   -6.50   11.20
   9   0  16    1.90    9.70
   9   1  16    0.50   10.20
   9   2  16   11.70    6.90
  10   4  16   74.39    9.60
  12   8  16   19.60   10.60
  13   9  16   40.70   10.90
  11 -12  15   17.20   15.10
  10 -11  15    3.80   10.40
   9  -9  15   21.80    9.20
   8  -6  15   12.70    7.60
   8  -5  15   24.90    9.90
   8   1  15   -4.10    8.60
   8   2  15   51.19    9.30
   9   5  15   82.29    8.80
  10   7  15    8.30    8.80
  11 -14  14   25.60   12.00
   9 -11  14   -1.60   11.80
   8  -9  14    3.70   10.10
   7  -6  14   11.20    8.70
   7  -5  14   99.79    8.90
   7   2  14   -9.10    7.90
   8   5  14  103.89    7.50
   9   7  14    8.50    7.00
  10   9  14   55.69    7.10
  11  10  14   20.70    7.70
  12  11  14    2.00    8.60
  13  12  14    3.00   10.00
  11 -15  13    3.10   15.50
  10 -14  13   -2.30   12.60
   8 -11  13   11.40   11.40
   7  -9  13   40.60    9.20
   6  -6  13   73.59    6.20
   6  -5  13  235.68    8.80
   6   1  13   35.60    6.80
   6   2  13  133.39    7.30
   7   5  13   76.09    6.80
   9   9  13   75.99    6.80
  10 -15  12    8.10   13.80
   9 -14  12   62.99   12.50
   7 -11  12    6.40    7.10
   6  -8  12   47.30    7.70
   5  -5  12   43.80    5.30
   5  -4  12  155.78    7.70
   5  -3  12   42.70    6.90
   5   0  12   -2.10    6.60
   5   1  12   60.49    6.30
   6   5  12   22.10    6.00
   7   7  12   54.59    5.60
   8   9  12  120.89    5.80
  10 -16  11   -7.90   12.20
   9 -15  11   35.20   11.80
   8 -14  11   30.30    7.70
   7 -12  11   28.80    8.90
   6 -10  11    2.00    7.70
   5  -8  11  394.36    6.20
   4  -3  11  221.18    4.90
   4  -2  11   16.90    4.60
   4  -1  11   34.10    4.10
   5   4  11   98.89    5.30
  10 -17  10   27.20   12.80
   9 -16  10   14.90   11.70
   8 -15  10   26.80    9.30
   6 -12  10   26.20    6.20
   5 -10  10  106.99    5.70
   4  -7  10   35.40    5.00
   4   3  10  415.66    5.30
   5   6  10   80.59    4.60
  10 -18   9   -5.00   11.50
   9 -17   9   32.30   10.70
   8 -16   9   48.70    7.90
   6 -13   9   43.70    8.60
   5 -11   9  171.38    7.70
   4  -9   9    3.10    4.90
   3  -5   9   11.10    4.00
   3  -4   9   17.30    5.70
   3   0   9   -2.10    4.60
   3   1   9   24.10    4.60
   4   5   9   16.20    3.80
   6 -14   8  123.49    8.20
   4 -10   8  112.29    6.40
   3  -7   8  315.27    5.90
   8  13   8    5.10    2.90
   9  14   8   20.20    3.20
  10 -19   7   18.30   12.50
   7 -16   7   66.79    8.90
   6 -15   7    2.40    5.60
   3  -9   7  233.88    5.50
   2  -5   7  599.34    4.70
   2  -4   7  617.44    5.70
   2   1   7  276.87    4.30
   5 -14   6   19.50    6.50
   3 -10   6   87.79    5.00
   2  -7   6   34.00    4.60
   3 -11   5  219.78    5.10
   1  -2   5  275.57    3.20
   1  -5   4  326.37    3.80
   9 -20   3   35.00    9.30
   7 -18   3   12.20    7.60
   6 -17   3   11.80    6.20
   5 -16   2   54.59    5.80
   6  14   2   47.60    2.40
   9  17   2   34.20    3.50
   4 -15   1   52.59    4.00
   5  13   1   66.19    2.60
  10  18   1    5.10    4.60
   8 -20  -1    0.20    5.70
   7 -19  -1    2.00    5.30
   1  -9  -1  251.87    1.90
  11  19  -1   39.30    7.10
   8 -20  -2   20.80    5.80
   7 -19  -2   69.89    4.90
   6 -18  -2   21.00    4.00
   4  12  -2  325.07    4.40
  11  19  -2   42.30    7.20
   8 -20  -3    2.80    5.00
   7 -19  -3    6.20    4.50
   0  -5  -3    0.00    1.00
   4  12  -3   46.60    3.80
  11  19  -3   43.00    7.80
   0   1  -4  553.94    3.80
   4  12  -4  393.56    5.30
  11  19  -4   76.29    9.10
   1  -9  -5  219.08    1.40
   0  -4  -5   -3.30    2.40
   0   0  -5    6.40    3.20
   2   8  -5  235.18    4.50
   3  10  -5   -2.50    4.30
  10  18  -5   15.00    7.80
   1   5  -6  276.47    4.90
   5  13  -6   31.50    5.60
  10  18  -6    0.10    9.70
   1   4  -7  152.98    3.70
   4  11  -7   12.50    3.90
   6  14  -7   22.00    6.80
   7  15  -7   25.60    7.40
   8  16  -7   21.30    7.90
   9  17  -7   65.99    8.20
   1  -7  -8  202.78    3.50
   1   3  -8   84.49    3.90
   3   9  -8  107.19    5.90
   3 -12  -9    0.10    3.00
   1  -5  -9   80.49    3.50
   1   2  -9  821.42    6.60
   2   6  -9  198.28    5.90
   4  10  -9    6.70    4.80
   6  13  -9   53.09    7.40
  10  17  -9   21.60    9.90
   1  -3 -10   94.19    4.50
   1  -2 -10   70.39    4.80
   1  -1 -10   16.80    4.80
   2   5 -10   12.60    6.10
   5  11 -10   19.00    5.60
   7  14 -10   35.80    8.60
   8  15 -10   30.90   10.30
   9  16 -10   10.40    9.90
   7 -17 -11    6.10    4.40
   2  -7 -11  269.77    4.90
   2   3 -11   56.59    4.80
   4   9 -11   31.10    7.60
   6  12 -11    0.30    8.90
   6 -15 -12   71.09    4.70
   3  -9 -12   11.10    4.80
   2  -5 -12   29.60    5.30
   2  -4 -12   26.60    5.00
   2   0 -12   14.80    4.60
   2   1 -12   45.80    6.40
   3   5 -12    5.90    5.10
   4   8 -12   14.10    7.90
   5  10 -12   32.70    7.70
   8  14 -12    7.40   10.40
   9  15 -12   21.60   11.10
   3  -7 -13   55.39    5.40
   3   4 -13   45.30    7.50
   4   7 -13   18.90    7.80
   5   9 -13  109.99    9.10
   7  12 -13   68.39   10.80
   8  13 -13  125.89   11.30
   9  14 -13   12.30   12.40
  10  15 -13   -0.60   13.10
   8 -16 -14   20.80    7.20
   4  -9 -14   12.70    6.60
   3  -5 -14   52.39    6.90
   3  -4 -14   40.10    6.90
   3   0 -14    2.00    5.30
   3   1 -14   49.10    7.30
   4   5 -14  118.59    6.20
   5   8 -14   18.80    9.00
   7  11 -14   96.09   12.10
   6 -12 -15   12.20    7.00
   5 -10 -15  103.79    7.20
   4  -7 -15   -7.20    7.20
   4   3 -15   74.29    8.90
   5   6 -15  112.49    9.30
   6   8 -15   35.80    7.60
   7  10 -15   18.30   11.90
   5  -8 -16   15.00    8.20
   4  -3 -16    8.70    8.20
   4  -2 -16  118.49    9.40
   4  -1 -16   74.79    9.00
   5   4 -16    5.70    9.20
   6   7 -16    0.60   11.20
   7   9 -16   74.59   11.60
   8  10 -16   20.90    9.80
   7 -11 -17   -2.70    9.40
   5  -5 -17   70.89    9.40
   5  -4 -17   70.69    8.90
   5  -3 -17   50.79    7.10
   5  -2 -17   37.70    7.30
   5  -1 -17   27.40    7.30
   5   0 -17    5.70    7.40
   5   1 -17   21.70   10.40
   6   5 -17   55.99   11.50
   7   7 -17   75.19    8.90
   8   9 -17   12.80   13.90
   8 -11 -18   54.29   10.80
   7  -9 -18   48.00   10.90
   6  -6 -18   -8.40   10.70
   6  -5 -18   16.50   10.20
   6   1 -18   36.90    8.60
   6   2 -18    8.80   11.80
   7   5 -18   95.69   12.30
   8   7 -18   35.10   10.50
   9   9 -18   15.30   16.50
   8  -9 -19   40.80   12.30
   7  -6 -19   13.80   12.10
   7  -5 -19   -3.40    8.90
   7   2 -19   -1.90   12.80
   7   3 -19   12.40   12.60
   8   5 -19   19.40   10.20
   9   7 -19   28.40   11.90
   8  -6 -20   33.80   13.80
   8  -5 -20   62.19   13.10
   8   1 -20    3.70   11.20
   8   2 -20    6.60   16.20
   8   3 -20    9.10   14.60
  12  -4  18   33.50   11.50
  12  -3  18   69.89   11.00
  12  -2  18   38.20   13.40
  12  -1  18    6.00   13.60
  12   0  18   21.30   10.40
  13   3  18    8.20   14.50
  12  -8  17    6.30   15.40
  11  -6  17   28.20   10.00
  11  -5  17    8.20   13.70
  11  -4  17   23.40   12.60
  11   1  17   19.90   11.40
  11   2  17    7.70   11.90
  12   5  17   14.70   10.90
  13   6  17   15.60   11.30
  11  -9  16   -1.30   14.10
  10  -7  16    2.70   11.50
  10  -6  16   22.00   11.10
   9  -3  16   12.90    8.00
   9  -2  16    1.90    7.80
   9  -1  16   14.50    8.00
  10   3  16   16.40    9.90
  11   6  16    8.10    9.30
  12   7  16   11.70   10.10
  11 -11  15    2.30   15.10
  10 -10  15   11.30    9.40
   9  -8  15    6.90    8.30
   9  -7  15   34.40   11.20
   8  -4  15  102.69    7.40
   8  -3  15   27.90    9.30
   8  -2  15   44.10    9.50
   8  -1  15    1.20    9.20
   8   0  15   18.50    8.50
   9   4  15  176.98    9.20
  10   6  15   27.30    8.40
  11   8  15   51.79    9.40
  12   9  15   49.99   10.60
  11 -13  14   30.40   15.20
  10 -12  14   29.90   10.60
   9 -10  14   41.60   11.90
   8  -8  14  102.29    7.60
   7  -4  14   -5.90    8.50
   7  -3  14   55.89    9.00
   7  -2  14   13.60    8.20
   7  -1  14    9.50    8.10
   7   0  14   -4.30    8.00
   7   1  14   13.80    5.60
   8   4  14  103.59    7.50
  10 -13  13   12.60   12.10
   9 -12  13  104.59   11.70
   8 -10  13   21.40   10.80
   7  -8  13   40.60    6.90
   6  -4  13  224.28    6.10
   6  -3  13  108.89    7.70
   6  -2  13  133.09    7.50
   6  -1  13   39.70    7.30
   6   0  13  218.68    7.30
   7   4  13   26.10    6.70
   8   7  13   54.19    6.30
  10  10  13   18.30    6.70
  11  11  13   22.20    8.00
  12  12  13   21.10    8.40
  13  13  13   20.90    7.60
   9 -13  12    8.20   11.20
   8 -12  12    9.70    7.70
   7 -10  12   84.79    9.60
   6  -7  12   -4.60    7.80
   5  -2  12   19.90    5.20
   5  -1  12   63.49    5.20
   6   4  12   47.50    5.90
   9  10  12    9.40    5.70
  13  14  12   10.40    7.40
   8 -13  11   72.19   10.50
   5  -7  11  190.38    5.60
   5   3  11  344.97    5.70
   8  10  11   28.70    4.90
  13  15  11   25.40    6.30
   7 -13  10   25.80    9.20
   6 -11  10    5.40    8.20
   5  -9  10  240.08    7.60
   4  -6  10  105.99    4.90
   4  -5  10  240.58    6.80
   4   2  10   91.29    5.10
   6   8  10   64.89    4.30
   8  11  10  103.59    4.70
  12  15  10    4.30    5.40
   7 -14   9   28.40    8.80
   4  -8   9   34.60    6.40
   3  -3   9  197.58    4.40
   3  -2   9   88.79    4.00
   3  -1   9   31.10    3.70
   8  12   9   79.39    4.00
  11  15   9   12.00    4.50
  10 -18   8    8.00   11.00
   8 -16   8   26.80    9.20
   7 -15   8   91.29    9.10
   5 -12   8   52.19    5.60
   3  -6   8  137.39    5.70
   3   3   8  281.77    4.30
   9 -18   7   65.09   10.60
   8 -17   7    2.10    8.80
   5 -13   7   37.60    5.20
   4 -11   7    3.00    5.30
   3  -8   7   54.59    5.30
   2  -3   7  285.17    4.70
   2  -2   7  608.24    5.30
   2  -1   7  282.87    4.60
   2   0   7  527.15    3.90
   3   5   7  101.79    3.00
  12  17   7    9.90    3.10
   6 -15   6   54.09    7.10
   4 -12   6  144.29    5.70
   2  -6   6   50.79    4.80
   2   3   6   11.60    2.80
  10 -20   5    3.20    9.80
   9 -19   5   98.29    9.90
   2  -8   5  222.58    3.50
   5 -15   4   21.40    5.40
   8 -19   3   25.50    7.50
   4 -14   3   15.80    4.50
   3 -12   3   54.69    4.20
   1   3   3   76.99    1.50
  12  19   3    1.70    3.50
   9 -20   2   28.90    9.00
   6 -17   2   24.20    6.20
   3 -13   1   50.49    3.30
   2 -11   1  118.19    2.90
   1  -8   1  400.36    3.00
   1   5   1  129.79    0.90
   4 -15   0   54.39    4.20
   0  -3   0   44.80    1.20
  11  19   0   24.00    5.80
   4  12  -1  119.69    3.00
   1   6  -2   91.39    2.30
   1   6  -3  581.24    3.70
   0  -5  -4  329.17    1.80
   1   6  -4   45.60    3.40
   0   1  -5    0.10    3.40
   4  12  -5  349.37    5.30
  11  19  -5    4.70    8.60
   0  -3  -6 1055.69    4.00
   0  -2  -6  215.58    2.50
   0  -1  -6  762.32    4.30
   0   0  -6  672.33    4.50
   2   8  -6  190.08    4.70
   3  10  -6   69.69    3.50
  11  19  -6    0.00   10.20
   2 -11  -7   89.29    2.00
   1  -8  -7  432.36    2.70
   1   5  -7   45.10    5.00
   5  13  -7   36.70    6.40
  10  18  -7   14.10    9.40
   5 -16  -8   18.10    1.70
   1   4  -8  351.46    5.90
   2   7  -8   84.49    4.10
   4  11  -8  234.18    6.60
   6  14  -8  107.59    7.60
   7  15  -8   90.69    8.30
   8  16  -8   29.40    8.80
   9  17  -8    1.40    9.50
   4 -14  -9   78.49    3.00
   1  -6  -9   54.09    3.60
   1   3  -9  124.29    5.70
   3   9  -9  161.98    6.20
   5  12  -9   -5.00    5.30
   5 -15 -10    8.10    3.40
   2  -9 -10    5.30    3.80
   1  -4 -10   30.20    4.40
   1   0 -10   -5.80    3.80
   1   1 -10   21.50    5.40
   3   8 -10  223.38    7.10
   4  10 -10  172.08    7.50
   6  13 -10   59.39    8.40
  10  17 -10   31.50   12.00
   2   4 -11  204.28    5.20
   3   7 -11  218.88    5.60
   5  11 -11   82.19    8.50
   4 -12 -12   23.30    4.90
   2  -6 -12   84.79    5.20
   2   2 -12   39.80    4.90
   2   3 -12  254.67    6.80
   3   6 -12  200.48    5.70
   6  12 -12   23.90    9.00
   7  13 -12   53.59    9.30
  10  16 -12   10.20   11.90
   4 -11 -13   44.80    5.90
   3  -8 -13  128.49    5.60
   2  -3 -13  254.37    6.00
   2  -2 -13   49.00    6.30
   2  -1 -13  792.92    8.10
   3   5 -13   82.79    7.90
   6  11 -13   -1.10   10.00
   7 -15 -14    7.80    6.90
   3  -6 -14   39.20    6.60
   3   2 -14   10.40    5.30
   3   3 -14   30.60    7.80
   4   6 -14   81.59    8.50
   6  10 -14   47.10   10.00
   8  13 -14   -1.60   11.70
   9  14 -14    3.80   14.30
   7 -14 -15   85.59    8.00
   4  -8 -15    9.00    6.70
   4   4 -15   15.30    6.60
   5   7 -15   90.89    9.90
   6   9 -15   48.60   11.00
   8  12 -15  112.29   13.60
   9  13 -15   38.10   13.10
   7 -13 -16   25.00    8.60
   6 -11 -16   17.90    7.90
   5  -9 -16   17.10    7.20
   4  -5 -16   69.29    8.10
   4  -4 -16    9.40    7.90
   4   0 -16  412.66    7.20
   4   1 -16   76.49    8.60
   4   2 -16  119.89    9.40
   5   5 -16   16.60    7.40
   6   8 -16    5.30   10.70
   8  11 -16   35.70   14.60
   9  12 -16   -3.40   13.80
   6  -9 -17   60.49    8.80
   5  -6 -17   34.00    9.80
   5   2 -17   41.50    7.70
   5   3 -17   52.29   10.50
   6   6 -17  105.39   11.90
   7   8 -17    6.50   11.80
   8  10 -17   20.10   13.70
   9  11 -17   50.29   14.70
   7 -10 -18    1.40    9.40
   6  -7 -18   18.50   10.60
   6   3 -18   14.90    8.60
   6   4 -18   11.30   12.10
   7   6 -18   -7.00    9.70
   8   8 -18   41.00   10.70
   9  10 -18    2.70   17.40
   7  -7 -19   85.49   11.20
   6  -3 -19   -8.70   11.30
   6  -2 -19   37.30   12.30
   6  -1 -19   71.79   12.80
   6   0 -19  158.68   12.50
   7   4 -19    3.30   13.40
   8   6 -19   -3.60   10.90
   9   8 -19    2.50   12.50
   7  -3 -20   26.30   13.00
   7  -2 -20    2.30   13.80
   7  -1 -20    7.40   13.60
   7   0 -20   -9.20   13.20
   8   4 -20   15.20   16.50
  13  -5  18   35.60   12.50
  13  -4  18   30.70   17.10
  13  -3  18    6.00   16.80
  13  -2  18   13.90   15.60
  13  -1  18   20.20   15.10
  13   0  18   -6.70   14.60
  13   1  18   10.40   15.10
  13   2  18   11.40   11.00
  12  -7  17   -7.70   11.00
  12  -6  17    5.30   14.40
  11  -3  17   36.20   10.10
  11  -2  17    9.80   11.70
  11  -1  17    8.20   11.80
  11   0  17   -1.20    9.30
  12   3  17   11.80   12.70
  12   4  17    7.60    8.80
  13   5  17   17.10   11.50
  12 -10  16   -0.60   11.40
  11  -8  16   -2.20   13.00
  10  -5  16   21.50   10.90
  10  -4  16   82.89   11.80
  10   1  16   53.69   10.50
  10   2  16   29.60    9.20
  11   5  16   12.30    9.80
  13   8  16   26.00   11.00
  12 -12  15    2.10   12.60
  11 -10  15   22.10   12.90
  10  -9  15    8.10    9.20
  10  -8  15   -1.00   11.00
   9  -6  15   95.29   10.50
   9  -5  15   79.89    9.70
   9   3  15   36.50    9.10
  11   7  15   30.60    8.50
  13  10  15   16.40    9.90
  11 -12  14   14.60   15.10
  10 -11  14  121.99   12.40
   9  -9  14   24.30   11.40
   8  -7  14   33.30    7.30
   8  -6  14    4.60    9.70
   8   3  14  105.19    8.40
   9   6  14   93.09    8.10
  10   8  14   20.50    7.20
  11   9  14   54.89    8.90
  11 -14  13   38.20   11.10
   9 -11  13  178.28   12.40
   8  -9  13   11.70   10.00
   7  -7  13   14.70    6.60
   7  -6  13   31.90    8.60
   7   3  13   74.29    6.90
   8   6  13   13.30    6.80
   9   8  13   20.50    6.80
  11 -15  12   68.89   14.70
  10 -14  12  102.69   12.90
   8 -11  12  164.28   10.70
   7  -9  12   40.00    8.90
   6  -6  12   43.20    8.10
   6   3  12   14.40    6.10
   7   6  12  167.28    6.10
   8   8  12   16.10    5.90
  10  11  12   30.50    6.00
  11  12  12   47.70    6.40
  12  13  12   28.30    6.60
  11 -16  11   14.80   14.30
  10 -15  11   16.30   12.80
   9 -14  11   38.70   11.80
   7 -11  11  223.58    9.60
   6  -9  11   34.80    5.70
   5  -6  11  321.07    6.00
   5  -5  11  342.57    7.40
   5   2  11  269.57    6.10
   6   6  11   70.09    4.90
   7   8  11  105.19    5.00
   9  11  11   54.09    4.80
  10  12  11   26.50    5.70
  11  13  11   49.80    6.10
  12  14  11   62.49    6.10
  11 -17  10   -6.60   13.60
  10 -16  10   17.90   12.50
   9 -15  10   25.80   10.90
   8 -14  10   40.00    7.20
   5  -8  10   33.60    7.20
   4  -4  10  109.99    6.30
   4  -3  10  484.65    6.80
   4   0  10  153.18    5.40
   4   1  10  573.44    5.80
   5   5  10   48.60    4.70
   9  12  10   36.30    5.10
  10  13  10   79.49    5.00
  11  14  10   84.69    5.00
  11 -18   9   11.20   13.40
  10 -17   9    2.30   12.00
   9 -16   9   55.79   10.80
   8 -15   9   11.40    9.40
   6 -12   9  101.49    7.60
   5 -10   9   70.49    6.90
   4  -7   9   92.49    6.10
   4   4   9   97.79    4.20
   5   7   9  853.91    5.20
   6   9   9   89.19    3.50
   9  13   9   16.70    4.00
  10  14   9   10.30    4.00
   9 -17   8    3.50    9.70
   6 -13   8   42.80    7.90
   5 -11   8    1.20    6.60
   4  -9   8  492.85    6.90
   3  -5   8   27.60    5.40
   3   2   8   57.39    4.00
   4   6   8  128.89    3.40
   6  10   8   34.80    3.30
  13  17   8   23.30    4.70
   6 -14   7   30.10    7.30
   6  11   7  312.27    2.80
   8 -17   6    4.60    9.70
   7 -16   6  110.39    8.20
   3  -9   6  213.48    5.30
   2  -5   6   39.80    4.60
   3   6   6   12.20    2.40
   7  13   6    7.80    2.10
  10  16   6   10.40    2.20
   3 -10   5    4.40    4.20
   2  -7   5  173.58    4.50
   5  11   5   23.60    1.40
  10 -20   4   11.80   10.10
   6 -16   4    1.30    6.40
   1  -4   4  211.38    2.90
   1   1   4  563.74    2.60
   8 -19   2   13.80    6.90
   7 -18   2  155.48    6.80
   4 -14   2   98.89    4.70
   2 -10   2  152.38    3.50
   1   4   2   61.79    0.80
   5 -16   1   69.49    4.60
   3  10   1  204.88    1.90
   2 -11   0   40.00    2.60
   4  12   0   10.50    2.60
   4 -15  -1   45.80    3.60
   1   6  -1  460.95    2.40
   1  -9  -2  517.75    1.60
   0   2  -2   91.69    2.40
   6  15  -2   31.90    4.60
   7  16  -2  151.98    5.30
   8  17  -2   59.99    5.50
   0   2  -3    0.50    2.00
   6  15  -3   31.50    5.50
   7  16  -3   60.19    5.00
   8  17  -3   25.40    6.20
   0   2  -4  241.18    2.90
   6  15  -4   83.49    5.30
   7  16  -4   38.30    5.60
   8  17  -4   68.59    6.30
   4 -15  -5   23.10    1.70
   0  -5  -5   -1.30    2.00
   0   2  -5    2.30    3.50
   1   6  -5  147.09    3.20
   6  15  -5   33.30    6.40
   7  16  -5   24.50    6.50
   8  17  -5    5.60    7.30
   0  -4  -6  154.88    2.70
   0   1  -6  803.22    4.80
   1   6  -6  211.08    4.90
   4  12  -6  161.68    5.30
   0  -2  -7   -3.90    3.50
   0  -1  -7   -0.20    3.90
   2   8  -7   20.60    3.50
   3  10  -7  447.46    4.80
   4  12  -7    2.40    5.60
   5  13  -8    6.90    7.00
  10  18  -8    4.10   10.40
   2 -10  -9   87.69    3.20
   1   4  -9  247.28    6.00
   2   7  -9   97.59    5.70
   4  11  -9   86.99    7.30
   6  14  -9   19.90    7.40
   7  15  -9   40.20    8.90
   8  16  -9   49.00    9.60
   9  17  -9   27.80   10.20
   1  -5 -10  143.89    4.40
   1   2 -10   62.29    5.50
   2   6 -10  111.59    4.50
   5  12 -10   52.89    7.80
   6 -16 -11  125.09    4.10
   4 -13 -11   28.80    4.00
   3 -11 -11   53.19    4.70
   2  -8 -11   12.40    4.20
   1  -3 -11  261.77    5.10
   1  -2 -11   40.30    5.30
   1  -1 -11  165.28    5.60
   1   0 -11   -3.90    5.30
   2   5 -11   44.70    6.30
   3   8 -11   15.30    7.10
   4  10 -11  144.69    8.10
   6  13 -11    9.90    9.40
   7  14 -11   80.09    9.30
   8  15 -11   18.70    8.00
   9  16 -11   31.10   10.80
  10  17 -11    7.40   13.00
   5 -14 -12   23.60    4.70
   3 -10 -12  101.89    4.80
   2  -7 -12  121.59    4.90
   2   4 -12   48.40    6.70
   3   7 -12   76.89    7.60
   4   9 -12   50.69    7.60
   5  11 -12  109.09    9.30
   7 -16 -13   14.40    5.50
   5 -13 -13   16.10    4.80
   2  -5 -13   65.29    5.70
   2  -4 -13  100.29    6.30
   2   0 -13   59.69    5.20
   2   1 -13  756.02    8.50
   2   2 -13   42.50    6.90
   3   6 -13   98.89    7.50
   4   8 -13   23.00    8.00
   5  10 -13   33.90    9.60
   7  13 -13   49.20   11.50
   8  14 -13   20.30   12.70
   9  15 -13   46.90   13.60
   5 -12 -14   42.30    5.90
   4 -10 -14   12.40    6.20
   3  -7 -14  284.77    7.00
   3   4 -14   43.00    8.20
   4   7 -14  118.19    9.70
   5   9 -14   88.79   10.20
   6  11 -14   28.10   10.50
   7  12 -14   26.00   11.40
   5 -11 -15   17.60    6.80
   3  -4 -15   11.90    7.60
   3  -3 -15    2.50    5.60
   3  -2 -15   20.60    5.60
   3  -1 -15   10.50    5.50
   3   0 -15   -3.50    5.60
   3   1 -15   15.70    7.90
   3   2 -15   13.20    8.00
   4   5 -15   30.20    6.50
   5   8 -15  318.77   11.10
   6  10 -15   22.20   10.60
   7  11 -15   39.10    9.10
   4  -6 -16   37.80    8.20
   4   3 -16    9.80    8.90
   5   6 -16   18.00    7.60
   7  10 -16   80.09   12.40
   9  13 -16   27.80   14.50
   7 -12 -17    9.80    9.60
   6 -10 -17   24.90    9.50
   5  -7 -17  281.77    9.30
   4  -2 -17   32.80    9.10
   4  -1 -17   21.10    9.10
   5   4 -17   61.99    7.70
   6   7 -17   21.40   12.10
   7   9 -17   40.20   13.60
   6  -8 -18   -3.50   10.70
   5  -4 -18    4.30   10.20
   5  -3 -18   29.60    9.80
   5  -2 -18    0.90    7.70
   5  -1 -18   44.50    7.80
   5   0 -18   -3.00   10.90
   5   1 -18   32.80   11.50
   6   5 -18   12.40   12.00
   7   7 -18  118.29    9.80
   8   9 -18    9.30   14.70
   7  -8 -19   14.20   11.10
   6  -5 -19   88.09   12.00
   6  -4 -19    5.60   11.30
   6   1 -19   58.89    9.90
   6   2 -19   31.90   13.30
   7   5 -19    6.40    9.80
   8   7 -19    3.50   11.10
   7  -6 -20   30.80   11.70
   7  -5 -20    8.50   13.60
   7  -4 -20   42.30   10.40
   7   1 -20    0.80   10.80
   7   2 -20   -0.90   15.10
   7   3 -20   12.40   14.40
   8   5 -20   57.59   12.30
  13  -7  17    0.40   15.60
  12  -5  17   22.40   10.80
  12  -4  17    4.60   14.30
  12  -3  17   -0.30   14.10
  12  -2  17   -1.00   13.10
  12  -1  17   21.80   12.50
  12   0  17   29.20   12.30
  12   1  17   24.60   12.70
  12   2  17    5.30   11.20
  13   4  17   16.90   12.90
  14   6  17   38.70   13.30
  12  -9  16   12.10   10.30
  12  -8  16   15.50   12.80
  11  -7  16   -4.80    9.50
  11  -6  16   15.40   12.80
  10  -3  16    7.40    8.30
  10  -2  16   27.30    8.10
  10  -1  16   47.70    8.60
  10   0  16   19.10    7.60
  11   3  16   15.20   10.10
  11   4  16  109.19    8.30
  12   6  16    3.80    9.90
  13   7  16   25.50   10.80
  12 -11  15   88.39   14.60
  11  -9  15    7.40   13.20
  10  -7  15   18.80   11.60
   9  -4  15  175.38    9.70
   9  -3  15   33.10   10.60
   9  -2  15   22.80    9.80
   9  -1  15    0.30    9.70
   9   0  15    6.40    9.70
   9   1  15   -4.60    9.30
   9   2  15   28.30    6.80
  10   5  15   20.40    7.00
  12   8  15   13.70    9.80
  12 -13  14    7.50   11.50
  10 -10  14   84.39   11.40
   9  -8  14   65.69   10.20
   8  -5  14  106.19    9.10
   8  -4  14  119.99    9.70
   8   1  14   64.39    7.80
   8   2  14   49.70    8.20
   9   5  14   11.40    7.90
  10   7  14    5.10    8.10
  12  10  14    2.80    8.30
  13  11  14   50.89    9.00
  12 -14  13   14.30   15.60
  11 -13  13    2.90   13.90
  10 -12  13   21.60    9.20
   9 -10  13   11.40   10.90
   8  -8  13    3.60    9.50
   7  -5  13   82.89    8.50
   7  -4  13   33.30    7.50
   7   2  13   47.30    7.50
  10   9  13   25.50    7.10
  10 -13  12   27.70   11.70
   9 -12  12  103.89   11.70
   8 -10  12   48.00    9.20
   7  -8  12   39.30    8.80
   6  -5  12   30.60    5.60
   6  -4  12   53.69    7.50
   6   2  12   68.59    6.20
   8 -12  11   75.79   10.00
   7 -10  11   33.40    8.90
   6  -8  11   35.80    7.10
   5  -4  11  103.99    6.60
   5  -3  11  360.06    7.20
   5  -2  11  277.27    6.60
   5   0  11    6.30    5.70
   5   1  11   -1.50    5.70
   6   5  11   68.29    5.30
   8 -13  10   64.99    9.00
   7 -12  10   35.60    6.70
   6 -10  10   31.70    7.20
   5  -7  10   99.39    7.10
   4  -2  10  104.69    4.30
   4  -1  10  563.74    5.10
   6   7  10   14.60    4.10
   7   9  10  101.59    4.20
   7 -13   9   17.80    8.60
   5  -9   9  166.28    7.30
   4  -6   9   43.40    5.70
   7 -14   8    5.20    8.40
   4  -8   8    5.00    5.40
   3  -4   8  238.18    5.80
   3   1   8  277.07    4.80
   5   8   8  118.69    3.30
  10 -18   7   14.80   11.70
   9 -17   7   59.29    9.10
   8 -16   7   30.40    9.20
   7 -15   7   32.30    8.20
   5 -12   7   83.59    6.60
   4 -10   7   10.30    4.00
   3  -7   7  360.06    5.50
   3   4   7  378.66    3.60
   4   7   7  133.09    3.10
   5 -13   6   21.10    6.10
   4 -11   6  180.48    5.60
   2  -4   6  416.46    4.90
   2   2   6  309.17    2.90
   4 -12   5  367.96    5.90
   2   4   5  304.17    2.50
   3   7   5  169.08    2.10
   9 -19   4   19.60    9.00
   8 -18   4   11.60    8.00
   7 -17   4  214.88    7.60
   2  -8   4  102.89    4.00
   1  -3   4  226.98    2.70
   1  -2   4  403.16    3.90
   1  -1   4  648.14    3.80
   1   0   4   -2.90    2.10
   3   8   4  580.44    1.60
   4  10   4   49.20    0.90
  10 -20   3   35.70   10.70
   5 -15   3   35.30    4.90
   1  -5   3  187.88    3.20
   3 -12   2  156.68    4.70
  10  18   2   48.70    3.60
   9 -20   1   -1.70    7.30
   8 -19   1    7.90    7.50
   7 -18   1   78.19    6.70
   6 -17   1   67.79    4.90
   2   8   1   38.90    1.30
  11  19   1   43.40    4.80
   5 -16   0   54.89    4.40
   3 -13   0   24.80    2.80
   0  -4  -1   -0.30    0.70
   6  15  -1   27.30    4.10
   7  16  -1   32.00    4.20
   8  17  -1    9.70    5.00
   4 -15  -2   34.90    3.30
   2   9  -2  131.39    2.80
   3  11  -2  681.73    4.60
   5  14  -2   62.69    4.20
   9  18  -2    6.90    6.10
   2   9  -3  163.98    3.10
   3  11  -3   23.20    3.60
   5  14  -3   96.59    4.10
   9  18  -3  129.69    6.40
   2   9  -4    6.20    3.40
   3  11  -4   28.60    4.10
   5  14  -4    8.50    4.70
   9  18  -4   37.10    6.70
   2   9  -5  165.78    4.30
   3  11  -5  225.08    4.90
   5  14  -5   47.90    5.20
   9  18  -5   54.49    7.50
   1  -9  -6  393.46    2.00
   0   2  -6  238.38    4.40
   2   9  -6  116.99    4.60
   6  15  -6   55.39    6.60
   7  16  -6  112.59    7.10
   8  17  -6   11.20    7.40
   9  18  -6    6.10    8.60
   0  -4  -7   -0.50    2.80
   0  -3  -7   -2.90    2.40
   0   0  -7    0.30    2.90
   0   1  -7    1.10    4.20
   1   6  -7  327.77    5.40
   7  16  -7   66.19    7.10
   8  17  -7    4.10    8.80
   3 -13  -8   67.09    2.30
   1  -8  -8  343.57    3.00
   1   5  -8  122.99    4.00
   2   8  -8   29.80    4.00
   3  10  -8  185.08    4.80
   4  12  -8   13.20    7.00
   6 -17  -9    4.00    2.10
   1  -7  -9   60.79    3.50
   5  13  -9  254.57    8.40
  10  18  -9    6.20   11.20
   3 -12 -10   69.99    3.50
   1  -6 -10   78.79    4.30
   1   3 -10   77.39    4.30
   2   7 -10   90.89    6.50
   3   9 -10  216.88    5.70
   4  11 -10   62.39    7.70
   6  14 -10   81.29    8.30
   7  15 -10   10.90    9.70
   8  16 -10    4.10   10.50
   9  17 -10    7.40   11.90
   1  -4 -11  276.77    5.30
   1   1 -11  149.19    4.30
   1   2 -11   51.59    5.90
   2   6 -11  161.68    7.10
   5  12 -11   75.09    9.40
   2   5 -12   25.70    6.90
   6  13 -12  128.19    9.40
   7  14 -12    2.10   10.50
   8  15 -12   11.80   10.90
   9  16 -12   22.10   12.40
   6 -15 -13   89.49    5.90
   3  -9 -13  160.98    5.70
   2  -6 -13  114.39    5.70
   2   3 -13  266.57    7.70
   4   9 -13  173.28    9.30
   6  12 -13   62.49   10.00
   6 -14 -14   14.40    6.00
   3  -8 -14   19.70    6.10
   2  -2 -14   98.69    7.10
   2  -1 -14   68.39    7.40
   2   0 -14  276.67    7.40
   3   5 -14   48.80    8.50
   4   8 -14   26.50    9.40
   5  10 -14   17.40    9.50
   8  14 -14    9.10   13.50
   9  15 -14   42.70   14.80
   6 -13 -15   34.00    7.00
   4  -9 -15    9.80    7.00
   3  -6 -15   67.89    7.00
   3  -5 -15   95.29    5.60
   3   3 -15   16.70    8.30
   4   6 -15   84.59    7.10
   7  12 -15   42.20   13.10
   8  13 -15   -0.30   12.90
   9  14 -15   75.59   14.10
   6 -12 -16   30.80    8.00
   5 -10 -16    4.60    7.80
   4  -7 -16   91.19    8.00
   4   4 -16   14.50    7.00
   4   5 -16   56.69    9.60
   5   7 -16   20.20    7.90
   6   9 -16   10.00    8.70
   7  11 -16   48.20   13.60
   8  12 -16   41.20   10.70
   5  -8 -17   41.70    8.50
   4  -5 -17   44.70    8.40
   4  -4 -17   52.39    9.30
   4  -3 -17   -4.10    6.80
   4   0 -17   59.79    7.40
   4   1 -17   19.60    9.10
   4   2 -17   25.60   10.40
   5   5 -17   63.49    7.90
   5   6 -17   43.50   10.50
   6   8 -17   56.49   12.10
   7  10 -17    4.70   12.70
   8  11 -17   15.10   14.00
   7 -11 -18   15.60   10.60
   6  -9 -18   24.30   10.50
   5  -6 -18   15.10   10.50
   5  -5 -18    3.60    7.90
   5   2 -18    3.70    7.80
   5   3 -18   26.70   11.70
   6   6 -18    8.10   11.80
   7   8 -18    9.80   10.40
   8  10 -18   46.60   16.80
   7  -9 -19   62.89   10.90
   6  -7 -19   73.69   10.60
   6  -6 -19   50.59   10.80
   6   3 -19   -4.50    9.80
   6   4 -19    4.80   13.60
   7   6 -19   -4.00   10.60
   7   7 -19   64.99   13.80
   8   8 -19    3.60   11.70
   7  -7 -20   21.80   13.20
   6  -1 -20    6.80   12.40
   7   4 -20   35.50   16.00
   8   6 -20   30.60   12.00
   7  -2 -21   11.00   14.10
   7  -1 -21   -0.90   14.20
  13  -6  17   13.90   11.70
  13  -5  17   27.10   15.20
  13   2  17   24.50   13.00
  13   3  17   44.10   13.30
  14   5  17   40.40   13.20
  13  -9  16   20.80   16.00
  12  -7  16    5.70   13.80
  11  -5  16   15.40    8.60
  11  -4  16  124.49   12.20
  11  -3  16   11.80   12.40
  11   0  16    6.30   11.00
  11   1  16   14.60   11.40
  11   2  16   48.20   10.60
  12   5  16   53.89   10.10
  14   8  16   30.90   11.80
  13 -11  15   53.59   17.10
  12 -10  15   13.60   14.70
  11  -8  15   52.79   12.80
  10  -6  15   20.40   10.70
  10  -5  15   11.90   10.40
  10   3  15   61.89    9.50
  10   4  15  149.99    7.10
  11   6  15   12.30    9.60
  13   9  15  115.69    9.60
  14  10  15   32.10   10.70
  12 -12  14    1.00   14.80
  11 -11  14  133.19   10.10
  10  -9  14   62.79   11.80
   9  -7  14   -4.50    7.30
   9  -6  14   86.79    9.70
   8  -3  14   84.49    7.00
   8  -2  14   49.80    8.40
   8  -1  14   59.49    7.70
   8   0  14  197.88    6.30
   9   4  14  101.49    8.20
  11   8  14    7.10    8.30
  10 -11  13   24.80   12.50
   9  -9  13   90.69    9.80
   8  -7  13   53.59    9.40
   7  -3  13   66.59    7.30
   7  -2  13   51.79    7.80
   7  -1  13   56.79    7.60
   7   0  13    3.20    7.40
   7   1  13   39.50    5.40
   8   5  13   16.20    6.50
   9   7  13   53.79    7.10
  11  10  13    8.30    7.20
  12  11  13   23.40    8.50
  13  12  13   15.50    9.10
  12 -15  12   21.50   13.90
  11 -14  12   10.00   12.70
   9 -11  12   51.09   10.50
   7  -7  12   42.40    8.20
   6  -3  12   11.10    5.20
   6  -2  12   60.39    7.10
   6  -1  12  125.89    7.30
   6   0  12    4.80    6.50
   6   1  12  116.69    5.10
   7   5  12   62.39    5.90
   8   7  12   67.59    6.20
   9   9  12   13.40    6.20
  12 -16  11    5.60   15.20
  11 -15  11    8.50   13.90
  10 -14  11    8.40   11.80
   9 -13  11   69.99    8.00
   8 -11  11   72.89    9.20
   6  -7  11   12.00    6.90
   5  -1  11    4.40    4.40
   7   7  11   53.09    5.20
   8   9  11   22.90    5.10
  11 -16  10   38.10   13.20
  10 -15  10   15.00   12.20
   9 -14  10    2.90   10.60
   7 -11  10  155.68    8.70
   6  -9  10   33.70    7.60
   5  -6  10   87.39    6.70
   5   4  10   55.59    4.60
  11 -17   9   22.40   12.50
  10 -16   9   13.60   11.90
   9 -15   9    5.30   10.30
   8 -14   9  121.89    9.00
   6 -11   9    4.10    5.60
   4  -5   9   18.20    5.80
   4   3   9  139.69    3.40
   5   6   9  216.58    4.40
   7  10   9   35.00    4.50
  11 -18   8   -3.50   11.80
  10 -17   8   12.80   11.70
   9 -16   8   43.00   10.80
   8 -15   8   28.80    8.70
   6 -12   8   50.39    7.60
   5 -10   8  173.08    6.80
   3  -3   8  290.97    4.40
   3  -2   8   48.10    5.10
   3  -1   8  276.07    5.30
   3   0   8    3.20    3.30
   4   5   8   15.50    3.20
   6 -13   7   41.50    6.90
   4  -9   7  207.08    5.70
   3  -6   7    9.40    5.10
   5   9   7   10.90    2.80
   6 -14   6   14.50    7.00
   3  -8   6    2.00    4.70
   2  -3   6   10.10    4.30
   2   0   6  142.59    3.60
   2   1   6  109.29    2.70
   5  10   6   32.30    2.00
   8  14   6    4.00    2.30
   2  -6   5  566.14    5.10
   9 -19   3   26.70    8.10
   8 -18   3    6.50    8.00
   7 -17   3   58.59    7.40
   6 -16   3   61.59    6.10
   4 -13   3  281.57    5.00
   5 -15   2   76.69    5.40
   4 -14   1  160.48    4.50
   9 -20   0   35.10    7.60
   6 -17   0   13.90    4.90
   1  -8   0  629.04    2.70
   7  16   0   50.49    4.00
   8  17   0   22.20    4.40
   5 -16  -1   71.89    3.80
   3 -13  -1   50.39    2.70
   2   9  -1  125.39    2.60
   9  18  -1   32.50    5.30
  10  19  -2   24.40    6.40
   4 -15  -3   70.89    2.80
   0   3  -3   -2.30    3.00
   1   7  -3  123.99    3.10
  10  19  -3    3.80    7.40
   4 -15  -4    2.50    2.20
   0   3  -4  181.78    2.60
   1   7  -4   22.30    3.70
   4  13  -4   53.39    5.20
  10  19  -4   14.00    7.40
   0   3  -5   -0.60    2.50
   1   7  -5  367.46    4.70
  10  19  -5   25.80    8.20
   0  -5  -6 1625.14    4.00
   0   3  -6 1238.48    5.80
   3  11  -6  110.79    3.80
   5  14  -6   21.10    5.90
  10  19  -6   12.30    9.70
   0   2  -7   -3.10    4.50
   2   9  -7  189.08    5.40
   3  11  -7   14.50    5.50
   5  14  -7   81.69    6.80
   6  15  -7    2.20    6.70
   9  18  -7   61.19    9.20
   2 -11  -8   43.70    2.30
   0  -3  -8   20.90    3.70
   0  -2  -8 1029.50    4.80
   0  -1  -8  146.89    3.30
   0   0  -8 1189.18    5.20
   0   1  -8  164.18    5.00
   1   6  -8  219.08    5.60
   6  15  -8   27.60    8.00
   7  16  -8   40.10    8.30
   8  17  -8   33.10    9.30
   1   5  -9   80.29    4.20
   2   8  -9  227.38    6.10
   3  10  -9   81.29    4.90
   4  12  -9   26.90    7.20
   2 -10 -10   80.69    3.70
   1   4 -10   42.20    4.30
   5  13 -10   30.00    8.40
   5 -15 -11   28.60    4.00
   2  -9 -11  162.68    4.20
   1  -5 -11   74.09    4.90
   1   3 -11  265.97    6.60
   2   7 -11  332.87    7.40
   3   9 -11   27.90    7.60
   4  11 -11   27.50    8.20
   6  14 -11  150.88    9.20
   7  15 -11   12.50   10.80
   8  16 -11   -0.10   11.30
   9  17 -11   61.29   12.50
   2  -8 -12    7.50    4.70
   1  -3 -12  101.79    5.70
   1  -2 -12  147.99    5.90
   1  -1 -12   25.80    5.80
   1   0 -12    0.90    5.90
   1   1 -12   31.30    5.80
   3   8 -12  243.58    6.20
   4  10 -12   55.29    5.90
   5  12 -12   14.70    9.70
   4 -12 -13    4.50    5.40
   2   4 -13  106.79    7.40
   3   7 -13   67.69    5.80
   5  11 -13   35.70    7.40
   7  14 -13   32.70   12.00
   8  15 -13   28.30   13.20
   9  16 -13   19.00   13.80
   4 -11 -14   22.90    6.60
   2  -4 -14   41.60    7.00
   2  -3 -14   13.40    5.30
   2   1 -14   52.69    5.50
   2   2 -14   93.29    7.70
   3   6 -14   48.00    8.50
   6  12 -14   46.50   11.70
   7  13 -14   10.80    9.00
   7 -15 -15   23.80    7.60
   5 -12 -15   10.80    7.60
   3  -7 -15   66.09    7.00
   3   4 -15   19.60    6.60
   4   7 -15    2.80    6.90
   5   9 -15   61.99    7.70
   6  11 -15   34.90   12.60
   7 -14 -16    7.30    8.80
   4  -8 -16   37.10    7.90
   3  -4 -16   30.90    8.20
   3  -3 -16   73.29    8.20
   3  -2 -16   72.09    6.20
   3  -1 -16   28.40    6.20
   3   0 -16   -0.10    6.00
   3   1 -16   37.80    8.90
   3   2 -16   70.49    9.30
   4   6 -16   48.20   10.20
   5   8 -16   15.80   10.30
   6  10 -16    6.00   12.80
   8  13 -16    5.00   13.90
   7 -13 -17   24.70    9.80
   6 -11 -17    9.40    8.90
   5  -9 -17  127.99    9.50
   4  -6 -17   -4.70    9.40
   4   3 -17   -2.60    7.50
   4   4 -17   54.89    9.80
   5   7 -17  288.57   11.80
   6   9 -17   51.19   13.10
   8  12 -17    7.30   15.80
   6 -10 -18    0.10   10.80
   5  -7 -18   21.50   10.10
   4  -1 -18  257.47   11.00
   5   4 -18    8.80    8.40
   5   5 -18    6.00   12.00
   6   7 -18   28.40   12.20
   7   9 -18   53.69   13.70
   6  -8 -19   18.90   10.80
   5  -4 -19    9.30   10.80
   5  -3 -19   17.60   11.80
   5  -2 -19   34.20   11.00
   5  -1 -19   19.70   11.40
   5   0 -19   -1.50   12.90
   5   1 -19   10.20   12.50
   5   2 -19   28.90   12.20
   6   5 -19   90.79   12.60
   7   8 -19   15.00   14.40
   6  -5 -20   -0.50   11.80
   6  -4 -20    5.20   13.10
   6  -3 -20    2.20   10.30
   6  -2 -20    5.30    9.90
   6   0 -20    3.70   10.40
   6   1 -20   20.10   13.30
   6   2 -20   -2.20   14.20
   7   5 -20   17.10   12.10
   7   6 -20   42.40   14.20
   7  -3 -21    6.90   11.40
   7   0 -21   -0.40   11.30
   7   1 -21    0.00   11.60
   7   2 -21    5.80   17.20
   7   3 -21   11.10   16.00
  14  -6  17   33.00   16.80
  14  -5  17   47.20   15.10
  13  -4  17   20.00   11.00
  13  -3  17   47.50   13.30
  13  -2  17   35.20   14.90
  13  -1  17    5.90   13.90
  13   0  17    1.60   13.70
  13   1  17    7.70   12.60
  14   3  17   49.90   13.20
  14   4  17   43.70   13.70
  13  -8  16   14.70   13.80
  12  -6  16   -2.40    9.40
  12  -5  16   54.09   13.30
  11  -2  16   53.09    8.90
  11  -1  16    0.70    9.00
  12   3  16   28.20   11.60
  12   4  16  105.19    8.60
  13   6  16   22.00   10.50
  14   7  16    8.20   12.10
  13 -10  15   20.20   14.70
  12  -9  15   48.90   13.70
  11  -7  15   42.30   12.30
  10  -4  15  153.78   10.50
  10  -3  15   73.19   10.40
  10  -2  15  144.49   10.10
  10  -1  15   95.49    9.90
  10   0  15  167.38    9.80
  10   1  15  107.09   10.00
  10   2  15  139.79    9.10
  11   5  15   86.29   10.20
  12   7  15   14.30    9.00
  13   8  15   23.80    9.60
  13 -12  14    5.20   15.00
  12 -11  14   -4.40   14.60
  11 -10  14    7.30    9.60
  10  -8  14   13.30   10.60
   9  -5  14    2.20    9.60
   9   3  14   43.40    8.40
  10   6  14   27.50    8.10
  12   9  14    8.30    8.90
  13  10  14    2.00    8.40
  14  11  14   -1.00   10.40
  12 -13  13   31.80   13.80
  11 -12  13   36.50   10.30
  10 -10  13   12.10   11.40
   9  -8  13   19.70    9.20
   8  -6  13   22.80    8.30
   8   4  13   14.00    6.70
   9   6  13   47.80    6.70
  10   8  13   25.70    7.30
  12 -14  12   39.30   13.00
  11 -13  12   44.10   12.30
  10 -12  12  116.49   12.30
   8  -9  12  127.69    7.20
   7  -6  12  198.58    8.60
   7   4  12  158.58    6.70
  10  10  12   38.20    6.40
  11  11  12   12.90    7.00
  12  12  12    0.90    7.80
  13  13  12    3.80    7.80
   9 -12  11   13.40   10.40
   7  -9  11   31.00    6.00
   6  -6  11   71.89    5.50
   6   4  11  191.68    4.30
   9  10  11   76.19    5.40
   8 -12  10  125.79    9.60
   6  -8  10   77.49    7.00
   5  -5  10   44.00    6.50
   5   3  10  101.39    5.00
   8  10  10   49.00    4.30
   7 -12   9   63.59    8.40
   6 -10   9  132.39    7.50
   5  -8   9  102.59    5.30
   4  -4   9  103.79    4.20
   4  -3   9  168.48    5.90
   4   1   9  748.53    5.80
   4   2   9  143.29    3.60
   6   8   9   57.69    3.80
  13  16   9   28.50    5.20
   7 -13   8   32.20    8.20
   4  -7   8   74.99    4.00
   7  11   8   25.90    3.70
   7 -14   7   34.50    7.80
   5 -11   7   16.70    6.20
   3  -5   7  118.99    5.30
   3   3   7   11.10    3.50
   7  12   7    7.00    2.90
  11 -19   6   -3.30   10.60
  10 -18   6   13.10   10.10
   9 -17   6   69.79    8.70
   8 -16   6   27.00    8.60
   7 -15   6   45.30    7.50
   5 -12   6    2.20    6.00
   4 -10   6  510.15    6.20
   2  -2   6  312.77    3.50
   2  -1   6  112.79    3.10
   4   8   6  118.89    2.30
   9  15   6   20.10    2.50
   5 -13   5   72.19    6.00
   4 -11   5   34.70    5.00
   3  -9   5  179.58    3.60
   2  -5   5  327.87    4.40
   4   9   5   10.20    1.60
   2  -7   4   50.89    4.00
   2   5   4   16.90    1.70
   1  -4   3    8.60    2.90
   1   2   3 1148.69    2.80
  10 -20   2   22.00    8.80
   5  13   2    5.60    1.70
   2 -10   1  137.79    2.80
   1  -7   1  441.96    2.70
   4  12   1  119.89    2.20
   8 -19   0   53.59    6.20
   7 -18   0   34.80    5.10
   1   6   0 1359.66    2.70
   6  15   0    1.30    3.40
   9  18   0   73.79    4.90
   9 -20  -1   -4.50    6.90
   2 -11  -1  113.59    2.30
   0   2  -1    2.20    1.10
   3  11  -1   54.59    2.50
   5  14  -1   43.00    3.20
  10  19  -1   63.69    5.90
   0   3  -2  414.26    2.80
   1   7  -2 1076.69    3.60
   4  13  -2   66.79    3.90
   4  13  -3  276.87    4.30
   4  13  -5   25.70    4.90
   1   7  -6  179.18    3.60
   4  13  -6   93.89    5.60
   1  -9  -7  158.48    2.30
   0  -5  -7    1.40    2.60
   0   3  -7    0.70    4.50
   1   7  -7   54.39    4.80
   4  13  -7   37.30    5.80
  10  19  -7    4.60   10.10
   0  -4  -8 1152.18    5.10
   0   2  -8 1153.58    6.40
   2   9  -8  146.09    6.00
   3  11  -8   15.20    6.00
   5  14  -8   13.00    7.00
   9  18  -8   24.00    9.30
   1  -8  -9   16.40    3.10
   0  -3  -9   -6.70    4.20
   0  -2  -9    5.20    4.20
   0  -1  -9   -3.30    4.60
   0   0  -9   -3.30    4.80
   0   1  -9    1.70    5.10
   1   6  -9   72.69    5.70
   6  15  -9  128.39    8.90
   7  16  -9   40.20    9.30
   8  17  -9   15.10   10.10
   9  18  -9   55.79   10.00
   4 -14 -10  114.39    3.20
   1  -7 -10  153.28    4.10
   1   5 -10  146.09    6.00
   2   8 -10   30.80    6.60
   3  10 -10   17.80    5.30
   4  12 -10   11.80    8.10
   1  -6 -11  172.78    4.80
   1   4 -11  319.17    6.90
   5  13 -11   28.70    9.20
   7 -17 -12   65.49    4.50
   4 -13 -12    7.80    4.70
   3 -11 -12   51.59    4.40
   1  -4 -12  119.49    5.50
   1   2 -12  148.09    6.50
   2   6 -12   82.69    5.40
   3   9 -12    8.40    8.00
   4  11 -12    7.00    9.20
   7  15 -12   77.79   11.70
   8  16 -12   18.10   12.00
   9  17 -12    5.30   12.00
   5 -14 -13   49.10    5.10
   3 -10 -13    0.40    5.20
   2  -7 -13   39.40    5.20
   2   5 -13   62.99    7.30
   3   8 -13  146.39    8.80
   4  10 -13  -11.90    8.60
   6  13 -13    6.90   10.00
   7 -16 -14   74.49    6.80
   5 -13 -14    4.70    5.70
   3  -9 -14  145.99    6.30
   2  -6 -14   59.59    6.20
   2  -5 -14   24.80    5.00
   2   3 -14   23.20    5.50
   2   4 -14   36.60    7.50
   3   7 -14  325.97    9.60
   4   9 -14   12.60    6.90
   5  11 -14   22.40   10.80
   8  15 -14   14.90   13.10
   4 -10 -15  135.19    6.90
   2  -3 -15   95.69    7.40
   2  -2 -15  176.58    8.30
   2  -1 -15   56.79    7.90
   2   0 -15  170.98    8.20
   2   1 -15   69.69    7.60
   3   5 -15   94.29    6.70
   4   8 -15   10.20    9.40
   5  10 -15  103.09   11.60
   7  13 -15   15.60   13.70
   8  14 -15   25.60   13.90
   6 -13 -16    0.40    8.70
   5 -11 -16   32.70    7.70
   4  -9 -16   19.50    7.70
   3  -6 -16   72.49    7.50
   3  -5 -16   61.09    7.50
   3   3 -16   76.89    9.10
   3   4 -16   27.20    9.00
   4   7 -16  102.79   10.50
   5   9 -16   15.50   11.80
   6  11 -16   30.90   12.20
   7  12 -16   60.79   12.90
   5 -10 -17   27.90    9.50
   4  -7 -17   26.00    9.00
   3  -1 -17   28.20    8.90
   4   5 -17   56.69   10.70
   5   8 -17   43.00   11.40
   7  11 -17    0.90   13.80
   5  -8 -18   40.90   10.20
   4  -4 -18   10.90   10.10
   4  -3 -18   45.90    9.30
   4  -2 -18   38.10    7.70
   4   0 -18   84.29    8.40
   4   1 -18  259.87   11.20
   4   2 -18   28.50   11.10
   5   6 -18   14.10   12.10
   6   8 -18   -6.40   12.20
   7  10 -18   -0.70   16.20
   5  -6 -19  110.19   10.40
   5  -5 -19    2.00   11.40
   5   3 -19   34.90   12.60
   5   4 -19    8.70   11.90
   6   6 -19   25.80   10.50
   6  -6 -20  -10.40   12.70
   6   3 -20    5.00   11.30
   6   4 -20    8.80   14.80
   7   7 -20    2.00   16.00
  14  -4  17   56.79   15.30
  14  -3  17   44.60   16.60
  14  -2  17   18.10   14.10
  14  -1  17    1.60   13.60
  14   0  17   15.60   13.60
  14   1  17   11.70   14.40
  14   2  17   43.70   14.40
  14  -8  16   12.60   15.90
  13  -7  16   36.00   10.90
  13  -6  16   30.30   13.80
  12  -4  16   96.69    9.90
  12  -3  16   41.00   12.80
  12  -2  16   37.10   12.70
  12  -1  16   46.00   12.70
  12   0  16   -0.40   12.40
  12   1  16   45.60   12.00
  12   2  16   39.50   10.80
  13   4  16   22.90   11.00
  13   5  16    8.00    8.70
  14   6  16    9.70   12.10
  13  -9  15  104.19   13.60
  12  -8  15    8.80   11.90
  11  -6  15    6.90    8.40
  11  -5  15   91.99   11.70
  11   3  15   26.20    9.00
  11   4  15    3.20    9.40
  12   6  15   17.70   10.00
  14   9  15   45.50    9.90
  12 -10  14   16.90   13.90
  11  -9  14   61.39    8.90
  10  -7  14    5.00    8.00
   9  -4  14   84.49    7.10
   9  -3  14   37.00    9.40
   9  -2  14  103.09    9.30
   9  -1  14   54.89    8.90
   9   0  14   -4.70    8.60
   9   1  14   52.59    8.70
   9   2  14  100.29    6.20
  10   5  14   98.99    8.40
  11   7  14   76.09    8.80
  13 -13  13   18.10   15.50
  12 -12  13   28.60   14.70
  11 -11  13   21.00   12.00
  10  -9  13   35.50   10.10
   9  -7  13   52.39    9.70
   8  -5  13   18.10    6.10
   8  -4  13    7.80    8.30
   8  -3  13  257.37    8.20
   8   2  13   16.50    7.60
   8   3  13  221.78    6.00
  11   9  13   10.60    7.40
  10 -11  12   23.40   10.60
   9 -10  12   21.00    7.70
   8  -8  12   16.10    6.80
   7  -5  12   81.79    5.90
   7  -4  12  179.78    8.10
   7   2  12  208.88    6.60
   7   3  12    4.10    6.20
   8   6  12  161.58    6.50
   9   8  12    6.20    6.60
  12 -15  11    6.70   14.60
  11 -14  11   14.00   12.90
  10 -13  11   46.00   10.90
   8 -10  11   28.00    8.40
   7  -8  11  105.19    5.90
   6  -5  11   74.39    5.30
   6  -4  11  234.68    7.20
   6   2  11  337.27    6.30
   6   3  11  283.37    4.60
   7   6  11   60.59    5.50
   8   8  11    7.10    5.00
  10  11  11   58.79    5.40
  11  12  11   30.30    6.60
  12  13  11   27.70    7.00
  13  14  11   44.40    7.20
  12 -16  10    6.40   14.40
  11 -15  10    9.40   12.90
  10 -14  10   -1.60   11.30
   9 -13  10  149.88   10.10
   7 -10  10   14.70    5.70
   5  -4  10   65.49    4.80
   5  -3  10  115.29    6.20
   5   1  10   33.60    5.30
   5   2  10  303.87    5.60
   6   6  10   18.40    4.30
   7   8  10   85.89    4.60
   9  11  10  119.19    5.40
  13  15  10   30.50    6.70
  12 -17   9   17.30   13.10
  11 -16   9    9.30   11.10
  10 -15   9   -2.80   10.00
   9 -14   9   98.89    9.80
   8 -13   9   60.19    8.70
   5  -7   9  977.70    8.10
   4  -2   9  156.88    4.20
   4  -1   9  704.03    5.20
   4   0   9  254.77    4.10
   5   5   9  143.49    4.30
   8  11   9    2.90    4.50
  11 -17   8   47.20   12.00
  10 -16   8   22.30   10.10
   9 -15   8   29.50   10.00
   8 -14   8   26.80    8.60
   6 -11   8   34.40    7.30
   5  -9   8   -1.40    6.30
   4  -6   8  139.89    5.80
   4   4   8  261.37    4.10
   5   7   8   -5.60    4.00
  12  16   8   13.60    4.00
  11 -18   7    7.90   10.90
  10 -17   7   11.00   10.70
   9 -16   7   32.70    9.60
   8 -15   7   68.89    8.70
   6 -12   7   55.49    6.80
   4  -8   7   64.89    5.70
   3  -4   7  432.86    5.50
  11  16   7   19.90    3.30
   6 -13   6   80.89    6.60
   3  -7   6  406.66    4.30
   3   5   6  471.75    3.10
   6 -14   5   52.89    6.30
   2   3   5  568.44    3.20
  10 -19   4    6.90    8.80
   9 -18   4   37.10    8.40
  11 -20   3   46.70   10.90
   5 -14   3   85.49    5.20
   9 -19   2   43.40    7.50
   8 -18   2   16.40    6.80
   7 -17   2   34.70    6.20
   6 -16   2   55.99    5.50
   4 -13   2   63.59    4.70
   2  -9   2  142.59    3.30
  10 -20   1   17.90    9.10
   5 -15   1  106.79    4.90
   3 -12   1    4.70    3.20
   4 -14   0   10.70    3.80
   8 -19  -1    9.60    6.20
   7 -18  -1   81.49    5.40
   6 -17  -1   78.29    4.60
   9 -20  -2   24.90    6.50
   5 -16  -2   54.49    3.70
   3 -13  -2   42.30    2.50
  11  20  -2   34.30    7.90
   1  -9  -3  181.08    0.90
   0   4  -3    3.40    2.80
   0  -6  -4   58.29    1.30
   0   4  -4   92.39    2.70
   2  10  -4   27.10    3.70
   7  17  -4  211.28    7.10
   0  -6  -5   -1.70    1.60
   0   4  -5    3.10    2.80
   2  10  -5  227.68    4.60
   6  16  -5    5.60    7.00
   7  17  -5   67.59    7.20
   0  -6  -6   81.19    2.30
   0   4  -6  155.78    3.40
   2  10  -6   21.10    4.60
   7  17  -6   36.70    7.80
   0   4  -7   -5.00    4.70
   1  -9  -8   18.00    2.60
   0  -5  -8   35.00    3.20
   0   3  -8   30.70    5.10
   1   7  -8  214.18    5.50
   4  13  -8   18.00    6.70
   3 -13  -9   44.80    3.00
   2 -11  -9   83.79    2.90
   0  -4  -9   -1.60    3.80
   0   2  -9    7.10    5.40
   2   9  -9   23.30    4.50
   3  11  -9  106.49    7.00
   5  14  -9   11.00    7.30
   0  -2 -10  141.19    4.90
   0  -1 -10  228.68    5.10
   0   0 -10  815.42    6.50
   1   6 -10  101.49    6.00
   6  15 -10   49.30    9.80
   7  16 -10   52.39    9.40
   8  17 -10   44.10   11.30
   9  18 -10    5.40   12.00
   3 -12 -11   98.89    4.20
   1  -7 -11   32.70    4.80
   1   5 -11   67.09    6.50
   2   8 -11   15.80    7.10
   3  10 -11   77.39    5.60
   4  12 -11    9.20    8.70
   6 -16 -12   10.10    4.50
   2  -9 -12   48.60    4.40
   1  -5 -12  239.28    4.20
   1   3 -12   88.49    5.00
   1   4 -12  143.09    6.90
   2   7 -12  111.19    5.50
   5  13 -12   29.70    9.60
   6  14 -12   11.00    7.40
   2  -8 -13  138.79    5.50
   1  -3 -13  139.19    5.90
   1  -2 -13  102.19    4.80
   1  -1 -13   39.30    4.90
   1   0 -13    3.80    5.10
   1   1 -13   43.20    7.10
   1   2 -13  110.39    7.40
   2   6 -13  109.99    7.60
   3   9 -13  176.18    8.30
   5  12 -13   57.29    7.50
   7  15 -13   20.40   11.70
   8  16 -13   13.10   12.30
   2   5 -14   29.70    8.40
   3   8 -14   18.80    9.60
   4  10 -14    9.90    9.80
   6  13 -14   19.00   12.20
   7  14 -14   96.79    9.80
   6 -14 -15   38.20    6.70
   3  -8 -15  123.59    6.80
   2  -4 -15  120.79    7.70
   2   2 -15  182.58    8.10
   2   3 -15   84.39    8.40
   3   6 -15   77.39    6.90
   4   9 -15    7.20   10.90
   5  11 -15   17.90   11.30
   6  12 -15   11.40    9.40
   3  -7 -16   44.40    7.50
   3   5 -16   65.69    9.90
   4   8 -16   41.40   10.00
   5  10 -16   -0.50   11.50
   7  13 -16   17.50   13.80
   6 -12 -17   37.40    8.80
   4  -8 -17   16.10    8.80
   3  -4 -17   66.39    9.00
   3  -3 -17    9.60    8.50
   3  -2 -17   21.70    7.10
   3   0 -17    4.50    7.10
   3   1 -17   25.50    7.10
   3   2 -17   27.50   10.60
   4   6 -17  -12.20   10.80
   6  10 -17   30.70   10.40
   7  12 -17    5.10   15.30
   6 -11 -18   11.70    9.70
   5  -9 -18    2.40    9.10
   4  -6 -18   32.50   10.10
   4  -5 -18  117.89    8.00
   4   3 -18   59.69    8.40
   4   4 -18   21.20   11.20
   5   7 -18   32.00   13.20
   6   9 -18   32.30   14.90
   7  11 -18   18.90   15.30
   6  -9 -19    5.40   10.20
   5  -7 -19   54.09   10.30
   4  -1 -19   28.00   11.00
   4   0 -19   98.09   11.90
   5   5 -19   18.60   13.30
   6   7 -19   75.59   10.40
   7   9 -19   50.29   12.70
   6  -7 -20    5.10   12.70
   5  -4 -20   24.20   12.20
   5  -3 -20    8.00   13.30
   5  -2 -20   81.49   13.30
   5  -1 -20   -8.50   12.10
   5   0 -20    1.20   13.70
   5   1 -20    1.20   14.20
   5   2 -20   81.19   13.50
   6   5 -20    4.30   11.10
   6   6 -20    5.40   14.50
   6  -4 -21   -0.70   14.70
   6  -3 -21   61.39   14.20
   6  -2 -21    2.40   11.10
   6  -1 -21   40.20   10.60
   6   0 -21   57.99   11.30
   6   1 -21   34.70   14.10
   6   2 -21   16.20   16.60
   6   3 -21   50.29   15.90
  15   1  17   10.60   14.00
  15   2  17    2.70   15.20
  15   3  17   -0.50   13.80
  14  -7  16   31.60   14.00
  14  -6  16   13.70   13.90
  13  -5  16   36.30   10.10
  13  -4  16   20.50   14.20
  13   2  16   56.99   11.50
  13   3  16   15.00   12.60
  14   5  16   -0.50   12.20
  14 -10  15   20.80   12.50
  13  -8  15   36.80   13.90
  12  -7  15   20.30    9.50
  12  -6  15   15.50   12.10
  11  -4  15    8.50    8.10
  11  -3  15   17.70   10.90
  11  -2  15   37.00   10.90
  11  -1  15    1.70    9.90
  11   0  15   -8.80    9.90
  11   1  15    3.70   10.20
  11   2  15   40.60    9.80
  12   5  15   51.49   10.60
  13   7  15   12.50    9.80
  14   8  15   32.50   11.40
  13 -11  14   39.50   11.20
  12  -9  14   13.80   11.90
  11  -8  14    4.80    8.50
  10  -6  14   37.60    7.90
  10  -5  14  132.89   10.50
  10   3  14  123.89    8.50
  10   4  14  118.59    8.10
  11   6  14   10.50    9.20
  12   8  14   40.40    9.30
  13   9  14   13.40    9.80
  14  10  14   13.40   10.60
  11 -10  13  -10.00   12.10
  10  -8  13   30.40    9.40
   9  -6  13   85.09    9.20
   8  -2  13   11.00    5.70
   8  -1  13   24.80    7.40
   8   0  13   67.69    7.30
   8   1  13   23.00    5.50
   9   5  13  103.89    6.90
  10   7  13   44.90    7.80
  12  10  13   93.79    8.00
  13  11  13   -3.00    8.30
  14  12  13    3.50    8.60
  13 -14  12   -0.50   15.10
  12 -13  12   28.70   13.60
  11 -12  12   46.60   12.10
   9  -9  12    5.40    9.40
   8  -7  12   78.29    6.80
   7  -3  12    0.50    5.20
   7  -2  12  172.18    7.30
   7  -1  12    9.90    7.40
   7   0  12   -8.60    7.30
   7   1  12   -5.50    6.90
   8   5  12   50.69    6.50
  10   9  12   71.29    6.90
  13 -15  11   25.70   13.90
  10 -12  11   26.00   10.80
   9 -11  11   48.80    7.50
   8  -9  11   19.70    8.80
   7  -7  11   47.70    5.50
   6  -3  11  293.17    5.80
   6  -2  11  321.07    7.10
   6  -1  11  247.08    6.50
   6   0  11  571.94    7.20
   6   1  11  221.48    6.30
   7   5  11   76.89    5.40
   8 -11  10   98.69    8.30
   7  -9  10  120.29    8.20
   6  -7  10   16.80    5.20
   5  -2  10  297.47    4.80
   5  -1  10   24.80    3.90
   5   0  10   -4.10    3.80
   6   5  10    7.80    4.70
  10  12  10   95.29    5.80
  11  13  10    6.70    5.60
  12  14  10    5.30    5.90
   7 -11   9   13.40    5.50
   6  -9   9  102.29    5.40
   5  -6   9  231.78    6.50
   9  12   9  107.99    4.50
  12  15   9   11.40    4.70
   7 -12   8   80.59    8.00
   5  -8   8  135.39    6.00
   4  -5   8   13.90    5.60
   6   9   8    8.40    3.10
   8  12   8   55.39    3.80
   5 -10   7   51.69    5.50
   3  -3   7    8.00    4.60
   3  -2   7  107.69    4.50
   3   1   7  118.09    4.30
   3   2   7   77.99    2.90
   4   6   7   33.30    2.70
   8  13   7   48.40    3.10
  10  15   7    9.40    3.30
  11 -18   6   81.19   10.80
   7 -14   6   60.49    6.90
   5 -11   6  200.28    6.00
   4  -9   6   45.60    5.10
   3  -6   6   15.00    4.80
  13  18   6    2.40    3.10
   7 -15   5   80.59    7.00
   5 -12   5    9.00    5.20
   3  -8   5   80.99    4.20
   2  -4   5  310.67    3.40
   2  -6   4    8.40    3.90
  10 -19   3    3.10    8.20
   6 -15   3   31.90    5.20
   1  -3   3   83.09    2.20
   1   1   3  232.48    2.40
   3 -11   2  620.24    4.70
  11  19   2   51.59    3.70
   9 -19   1    5.60    7.70
   6 -16   1   10.70    5.70
   7  16   1   30.30    3.20
   8  17   1   10.20    3.50
   2   9   0   11.90    1.80
   3  11   0   18.00    2.20
   5  14   0   21.70    3.00
  10  19   0   69.79    5.50
   1   7  -1  477.35    2.80
   4  13  -1   18.90    3.30
   8 -19  -2    9.60    5.40
   6 -17  -2   25.90    4.10
   2 -11  -2   77.89    1.80
   9 -20  -3   22.90    5.80
   5 -16  -3  100.89    3.50
   2  10  -3  129.49    3.30
   3  12  -3   71.89    4.50
   6  16  -3   63.59    5.50
   7  17  -3   63.99    5.70
   8  18  -3   10.80    6.40
   1   8  -4  236.78    4.00
   3  12  -4  342.27    4.70
   5  15  -4   22.20    5.50
   6  16  -4    7.70    5.20
   8  18  -4    8.80    6.40
   0   5  -5   -2.30    3.90
   1   8  -5  249.08    4.50
   3  12  -5   11.80    4.30
   5  15  -5  121.39    5.70
   8  18  -5   45.00    7.00
   9  19  -5   89.09    9.10
   0   5  -6 1918.61    6.80
   1   8  -6  141.09    4.80
   3  12  -6   41.20    4.90
   5  15  -6   25.80    6.40
   6  16  -6   31.00    6.70
   8  18  -6   -1.60    7.50
   9  19  -6    3.60    9.60
   0  -6  -7   -1.90    2.20
   1   8  -7  555.24    5.80
   2  10  -7  284.97    4.50
   3  12  -7  265.57    6.20
   5  15  -7   84.99    7.80
   6  16  -7   19.20    7.10
   7  17  -7  158.38    8.10
   8  18  -7    9.80    8.50
   0   4  -8 1247.18    7.10
   2  10  -8   14.70    5.70
   3  12  -8   92.29    6.40
   6  16  -8   46.30    7.50
   7  17  -8  110.29    8.90
   8  18  -8   23.60   10.40
   5 -16  -9   80.99    2.00
   0  -5  -9    0.10    3.40
   0   3  -9    5.50    3.80
   1   7  -9   58.99    4.10
   4  13  -9   50.99    7.20
   1  -8 -10  208.38    3.80
   0  -4 -10  132.99    4.30
   0  -3 -10  224.68    4.70
   0   1 -10  218.78    4.30
   0   2 -10  145.49    5.80
   2   9 -10    8.70    5.10
   3  11 -10   93.99    5.70
   4  13 -10    2.30    7.60
   5  14 -10   27.40    6.20
   4 -14 -11   14.50    4.00
   2 -10 -11   49.80    3.70
   0  -1 -11   -1.50    5.10
   0   0 -11    4.40    5.10
   1   6 -11  199.28    7.00
   5  14 -11   35.80    8.60
   6  15 -11   33.00   10.60
   7  16 -11    6.30   10.00
   8  17 -11   -1.70   11.00
   1  -6 -12  125.89    5.20
   1   5 -12  288.57    7.30
   2   8 -12    2.70    7.50
   3  10 -12  100.59    7.80
   4  12 -12   26.30    9.50
   3 -11 -13  159.58    5.80
   1  -5 -13  605.14    6.90
   1  -4 -13   67.09    4.60
   1   3 -13  138.49    7.40
   2   7 -13   23.90    7.90
   4  11 -13   45.60    7.20
   5  13 -13   25.40    9.60
   6  14 -13   12.10   10.70
   6 -15 -14    2.50    6.00
   4 -12 -14   18.10    5.70
   3 -10 -14    3.10    5.80
   2  -7 -14    0.90    6.00
   1  -2 -14   30.60    6.80
   1  -1 -14   -5.70    7.20
   1   0 -14   -7.60    7.30
   1   1 -14    4.30    7.00
   2   6 -14   66.09    8.40
   5  12 -14   47.30   10.90
   5 -13 -15   90.69    7.60
   4 -11 -15   38.10    6.50
   3  -9 -15   20.20    6.80
   2  -6 -15  114.89    6.80
   2  -5 -15   89.99    5.50
   2   4 -15  151.68    9.20
   3   7 -15   61.59    7.10
   6  13 -15   32.30   11.80
   7  14 -15   91.99   14.60
   5 -12 -16   14.20    7.30
   4 -10 -16    9.10    7.40
   2  -3 -16   21.50    8.50
   2  -2 -16   10.00    8.50
   2  -1 -16    5.30    8.40
   2   0 -16   72.19    8.40
   2   1 -16   -6.10    8.70
   2   2 -16   15.10    8.50
   3   6 -16   92.79   10.10
   6  12 -16   35.90   13.70
   5 -11 -17   11.10    8.90
   3  -5 -17   59.49    8.40
   3   3 -17   -1.60    7.40
   3   4 -17   61.89   10.40
   4   7 -17   45.40   10.90
   5   9 -17  121.49    9.30
   6  11 -17   10.60   15.10
   4  -7 -18   46.70    9.80
   3  -2 -18    3.10    9.40
   3  -1 -18   16.20   10.10
   3   0 -18  -11.30   10.10
   4   5 -18  114.09   11.40
   5   8 -18   20.00   13.60
   6  10 -18   15.00   15.30
   6 -10 -19    6.60   11.20
   5  -8 -19   97.69   10.20
   4  -4 -19   25.80   11.60
   4  -3 -19   33.20   10.40
   4  -2 -19   -0.40    8.60
   4   1 -19   41.60    9.20
   4   2 -19   -2.50   13.10
   4   3 -19   30.20   11.60
   5   6 -19  112.99   13.30
   6   8 -19   23.40   10.90
   6  -8 -20   21.20   12.60
   5  -5 -20   20.20   12.30
   5   3 -20  -11.20   13.80
   5   4 -20   27.90   15.10
   6   7 -20   10.40   15.60
   6   4 -21  -10.70   16.90
  15  -2  17   -3.20   11.90
  15  -1  17    5.80   11.40
  15   0  17    3.10   11.60
  14  -5  16    5.40   14.90
  13  -3  16   13.30    9.60
  13  -2  16   58.39   12.60
  13  -1  16   21.60   12.20
  13   0  16   -5.80   11.90
  13   1  16   13.60    9.20
  14   3  16    3.50   12.10
  14   4  16   13.30   12.50
  15   6  16   53.19   12.30
  14  -9  15   47.10   11.80
  13  -7  15    0.30   13.50
  12  -5  15   62.89   12.00
  12  -4  15    3.10   10.90
  12   3  15   34.40    9.70
  12   4  15    7.20    9.60
  13   6  15   36.70   10.60
  14   7  15   35.70   10.80
  14 -11  14    6.10   16.80
  13 -10  14    7.70   13.80
  12  -8  14   37.30   12.00
  11  -7  14   69.99    8.40
  11  -6  14   33.90   11.00
  10  -4  14  109.59    7.40
  10  -3  14  128.19   10.10
  10  -2  14   38.60    9.60
  10  -1  14   53.49    8.90
  10   0  14   29.10    8.90
  10   1  14   43.70    9.20
  10   2  14   38.80    9.50
  11   5  14  237.38    9.70
  12   7  14    9.50    9.20
  13 -12  13   32.60   11.10
  12 -11  13   28.10    9.70
  11  -9  13   11.70   11.40
  10  -7  13   51.39    9.50
   9  -5  13  111.09    8.90
   9  -4  13   60.89    9.00
   9   3  13   94.59    7.70
   9   4  13   59.99    5.90
  10   6  13   51.19    7.60
  11   8  13   12.00    7.70
  11 -11  12   22.20   12.20
  10 -10  12   53.19    7.60
   9  -8  12    8.90    9.50
   8  -6  12  174.98    6.40
   8  -5  12   57.89    8.50
   8   4  12  212.98    7.30
   9   7  12    5.00    6.40
  11  10  12  125.89    6.90
  12  11  12   10.80    7.60
  13  12  12   10.60    8.20
  14  13  12   15.90    7.80
  12 -14  11   66.09   10.30
  11 -13  11   68.89    9.10
   9 -10  11   88.09    9.80
   8  -8  11    1.40    8.20
   7  -6  11   54.89    5.60
   8   7  11   -2.60    5.40
   9   9  11    9.10    5.40
  13 -16  10    3.90   13.70
  12 -15  10   -2.00   13.80
  11 -14  10   95.99   12.20
  10 -13  10   82.69   10.70
   9 -12  10   34.50    7.00
   8 -10  10   58.69    8.60
   7  -8  10   91.59    7.30
   6  -6  10   18.80    5.10
   7   7  10  311.17    5.20
   8   9  10   10.70    4.40
  12 -16   9   -3.70   12.90
  11 -15   9   16.40   11.10
  10 -14   9    9.00    9.50
   9 -13   9   13.50    9.40
   8 -12   9   86.89    6.80
   7 -10   9   46.70    7.80
   6  -8   9   63.29    7.20
   5  -5   9  144.49    6.30
   5   4   9  136.49    4.50
   6   7   9  103.69    4.20
   7   9   9  209.48    4.10
  10  13   9   34.90    4.90
  11  14   9   47.40    5.00
  12 -17   8   -2.40   12.50
  11 -16   8    2.20   10.70
   9 -14   8   25.40    8.70
   8 -13   8   16.40    8.20
   6 -10   8   44.60    6.50
   4  -4   8  276.57    5.90
   4   3   8   25.60    3.80
   9  13   8   55.59    3.70
  10  14   8   65.79    4.20
  11  15   8   31.70    4.50
  12 -18   7    0.80    9.60
  11 -17   7   22.00   11.00
  10 -16   7   18.80    9.60
   9 -15   7   59.49    8.90
   8 -14   7   76.09    8.10
   7 -13   7   12.40    5.70
   4  -7   7  131.89    3.90
   3  -1   7  105.59    3.40
   3   0   7   -6.50    3.10
   6  10   7   48.40    2.90
   9  14   7    8.80    3.40
  10 -17   6   16.40    9.90
   9 -16   6   77.69    9.20
   8 -15   6   69.99    8.20
   4 -10   5   29.90    4.50
   2  -3   5  582.74    3.80
   2   2   5   61.99    1.90
   3  -9   4    3.10    2.80
   9 -18   3  127.39    8.10
   8 -17   3   10.50    7.00
   7 -16   3   51.49    6.50
   1  -2   3 1185.98    3.50
   1  -1   3  250.67    3.00
   1   0   3    0.60    2.50
  11 -20   2   24.60    9.90
   5 -14   2   46.50    5.00
   8 -18   1   34.50    6.20
   7 -17   1   49.90    5.50
   6  15   1   27.70    2.90
  10 -20   0    0.70    8.60
   5 -15   0   24.10    4.50
   3 -12   0  127.99    3.40
   2 -10   0   20.90    2.40
   4 -14  -1  162.68    3.50
   1  -8  -1  370.06    1.80
  11  20  -1   43.10    6.00
   7 -18  -2  148.29    5.00
   0   4  -2 2256.37    4.40
   2  10  -2  146.99    2.90
   3  12  -2  143.39    3.90
   6  16  -2   47.00    4.80
   7  17  -2   40.40    5.10
   8  18  -2   14.90    5.30
   8 -19  -3   21.50    5.40
   1   8  -3  537.65    3.90
   5  15  -3   35.30    4.30
   9  19  -3   32.50    7.00
   9 -20  -4   12.30    5.80
   0   5  -4  374.16    3.70
   9  19  -4   14.60    6.80
   9 -20  -5   18.00    5.30
   4  14  -5  181.68    5.30
   4  14  -6    8.50    5.60
   0   5  -7    3.00    3.50
   4  14  -7   22.00    6.10
   9  19  -7   24.30    9.70
   0  -6  -8  591.84    3.70
   0   5  -8   32.60    5.30
   1   8  -8  368.36    4.80
   5  15  -8  113.89    8.10
   9  19  -8    4.10   10.30
   1  -9  -9  115.49    3.40
   0   4  -9    2.00    3.90
   1   8  -9   24.50    5.70
   2  10  -9   97.09    6.30
   3  12  -9   -1.70    7.10
   5  15  -9   58.19    7.90
   6  16  -9   38.80    8.90
   7  17  -9   33.20    9.80
   8  18  -9    1.20   10.40
   6 -17 -10   31.10    2.40
   2 -11 -10   55.59    3.80
   0   3 -10  216.08    4.50
   1   7 -10  155.38    5.00
   2  10 -10  103.39    6.90
   1  -8 -11   56.09    4.60
   0  -3 -11   -0.60    4.80
   0  -2 -11   -2.50    3.60
   0   1 -11   -2.70    3.90
   0   2 -11    5.00    5.80
   2   9 -11  170.78    5.80
   3  11 -11   51.59    5.80
   4  13 -11   35.40    8.80
   5 -15 -12   33.30    4.20
   3 -12 -12   31.80    4.50
   1  -7 -12   32.70    4.80
   1   6 -12  153.18    7.40
   5  14 -12   27.40    9.30
   6  15 -12   88.39   11.60
   7  16 -12    9.60   11.00
   8  17 -12    8.10   11.60
   7 -17 -13    3.80    5.00
   4 -13 -13   36.50    5.30
   2  -9 -13    4.30    5.10
   1  -6 -13    8.80    5.40
   1   4 -13   73.29    5.50
   2   8 -13  161.48    8.50
   3  10 -13   -0.30    8.70
   4  12 -13    4.60   10.00
   5 -14 -14    3.70    5.80
   2  -8 -14   32.80    6.00
   1  -4 -14  121.79    7.10
   1  -3 -14   26.00    6.90
   1   2 -14   48.80    7.10
   1   3 -14   19.50    7.80
   2   7 -14    4.50    8.70
   3   9 -14  155.38    7.40
   4  11 -14   14.80    9.80
   6  14 -14   18.40   12.60
   7  15 -14    0.10   10.20
   2   5 -15   98.69    6.40
   3   8 -15  131.39    7.40
   4  10 -15  130.79    8.60
   5  12 -15   26.50   12.60
   6 -14 -16   47.70    8.20
   3  -8 -16  121.79    7.80
   2  -5 -16  111.09    7.60
   2  -4 -16  111.49    7.80
   2   3 -16   28.90    9.50
   3   7 -16   57.69   10.20
   4   9 -16   16.40    8.00
   5  11 -16   50.09   11.90
   7  14 -16   18.40   15.80
   6 -13 -17   29.60    9.70
   4  -9 -17   16.90    8.10
   3  -6 -17    3.60    6.40
   3   5 -17   56.59   10.20
   4   8 -17    8.10   11.90
   5  10 -17   25.60   12.80
   6  12 -17   26.20   13.60
   7  13 -17   31.80   14.80
   6 -12 -18   12.10   10.50
   5 -10 -18   17.40    9.50
   4  -8 -18   45.10    9.10
   3  -4 -18   62.69    9.90
   3  -3 -18   48.90    9.20
   3   1 -18   23.50    7.90
   3   2 -18    0.60    9.90
   3   3 -18   49.80   10.90
   4   6 -18   25.20    9.10
   4   7 -18   54.29   11.40
   5   9 -18   10.80   14.60
   6  11 -18    2.00   15.20
   4  -6 -19    2.40   10.00
   4  -5 -19   13.60   10.30
   4   4 -19   26.40   11.80
   4   5 -19   13.80   12.00
   5   7 -19   44.60   10.20
   6   9 -19    2.40   12.20
   5  -6 -20   64.49   11.40
   4  -2 -20   89.79   11.70
   4  -1 -20   43.70   11.70
   4   0 -20  172.68   12.70
   5   5 -20   20.20   13.40
   6   8 -20   25.50   16.60
   5  -3 -21   13.80   14.80
   5  -2 -21   36.20   15.10
   5  -1 -21   13.00   13.30
   5   0 -21   -5.50   13.60
   5   1 -21    3.50   15.10
   5   2 -21   22.40   15.80
  15  -6  16   60.29   12.40
  15  -5  16    7.20   15.90
  14  -4  16    7.50   11.00
  14  -3  16    3.40   13.60
  14  -2  16   27.00   14.70
  14  -1  16   67.09   14.10
  14   0  16  205.78   13.90
  14   1  16   80.29   13.50
  14   2  16   35.60   13.20
  15   4  16   21.20   12.50
  15   5  16    9.40   12.00
  14  -8  15   26.20   10.90
  14  -7  15   -2.30   13.20
  13  -6  15   40.50   12.10
  13  -5  15    9.40   11.90
  12  -3  15   25.70   10.60
  12  -2  15   34.60   12.00
  12  -1  15   51.49   11.70
  12   0  15   50.69   11.20
  12   1  15   49.90   11.00
  12   2  15   15.50    9.60
  13   5  15    8.20   10.60
  15   8  15   22.80   12.00
  14 -10  14    0.20   16.00
  13  -9  14   17.70   12.40
  12  -7  14    7.50   11.90
  11  -5  14  224.58   11.10
  11   4  14   45.50    9.10
  12   6  14   72.69    9.10
  13   8  14   55.39    9.80
  14   9  14   37.00   10.30
  15  10  14    0.50   10.00
  14 -12  13    9.90   15.90
  13 -11  13   12.20   14.50
  12 -10  13   90.79    9.40
  11  -8  13   17.20   11.30
  10  -6  13   50.89    9.80
   9  -3  13   78.69    8.30
   9  -2  13   28.40    8.50
   9  -1  13    6.80    8.10
   9   0  13   -6.50    8.10
   9   1  13   15.60    7.90
   9   2  13   33.50    7.90
  10   5  13   43.60    7.30
  12   9  13   20.00    8.00
  13  10  13   61.99    8.50
  14  11  13   -1.30    9.10
  13 -13  12    4.40   10.90
  12 -12  12    1.60    9.50
  10  -9  12   86.39   10.20
   9  -7  12   -0.80    9.20
   8  -4  12  213.78    8.40
   8  -3  12   11.40    7.10
   8   3  12   -2.60    7.10
   9   6  12   39.30    6.70
  10   8  12    6.60    6.70
  13 -14  11   41.20   14.10
  12 -13  11   29.50   12.80
  11 -12  11   43.00   11.90
  10 -11  11   50.29    9.80
   8  -7  11   -1.40    7.40
   7  -5  11   84.79    5.50
   7  -4  11   11.20    7.20
   7   3  11   67.79    5.40
   7   4  11   23.10    4.10
  10  10  11   43.30    5.80
  14  14  11   62.79    8.20
   9 -11  10  146.59    9.90
   6  -5  10    3.10    4.80
   6  -4  10   29.90    6.30
   6   3  10  163.38    4.90
   6   4  10   18.20    3.50
   8 -11   9    3.50    8.30
   6  -7   9  117.49    6.70
   5  -4   9  134.19    6.00
   5   3   9  114.69    4.80
  10 -15   8   36.00    7.70
   7 -11   8   27.10    7.80
   6  -9   8    8.60    6.40
   5  -7   8    5.80    5.40
   4  -3   8   26.50    3.90
   4  -2   8  321.87    5.80
   4  -1   8  164.58    4.90
   4   1   8  146.79    4.70
   4   2   8  295.07    3.60
   5   6   8   -0.10    3.50
   6 -11   7  332.47    5.80
   5  -9   7   15.60    4.10
   4  -6   7   28.60    5.20
   4   5   7  187.88    3.70
   5   8   7  152.88    2.90
  12 -18   6   46.30   11.30
   6 -12   6   76.79    6.70
   4  -8   6  142.19    5.10
   3  -5   6  506.55    4.40
   3   4   6  193.58    3.00
  12 -19   5   12.60   11.10
  11 -18   5    8.30    9.90
   6 -13   5   12.20    6.30
   3  -7   5  180.08    4.50
   2  -2   5   61.59    2.60
   2  -1   5 1822.22    5.50
   2   0   5  966.90    4.30
   2   1   5 1716.53    4.30
   3   6   5    0.70    2.00
   2  -5   4   17.20    3.50
   2   6   3   97.49    1.10
  10 -19   2   31.60    8.20
   4 -13   1   21.50    3.70
   2  -9   1  137.99    3.00
   1  -6   1  474.65    2.60
   9  18   1   36.20    3.80
   9 -19   0    6.50    7.70
   6 -16   0   20.80    5.10
  10 -20  -1    4.10    8.00
   0   3  -1    2.30    1.60
   1   8  -2   26.70    2.80
   5  15  -2   76.89    4.60
   9  19  -2   41.10    6.20
   7 -18  -3   11.60    4.40
   6 -17  -3   13.10    3.80
   3 -13  -3   19.00    2.00
   0   5  -3   -0.60    2.80
   4  14  -3   13.10    4.50
   8 -19  -4    3.70    4.90
   5 -16  -4   34.80    2.90
   4  14  -4  192.48    4.60
  10  20  -4   -0.10    8.40
   0   6  -5   -3.80    3.90
   2  11  -5  164.28    4.80
  10  20  -5    5.80    8.40
   9 -20  -6    8.80    4.80
   0   6  -6   89.19    4.70
   1   9  -6  477.25    5.50
   2  11  -6    7.90    5.00
   0   6  -7    1.60    4.90
   1   9  -7  192.18    5.10
   2  11  -7  105.39    5.60
   2  11  -8   53.99    6.00
   4  14  -8   37.70    6.80
   0  -6  -9    5.90    3.40
   0   5  -9   -2.50    5.40
   4  14  -9   92.69    7.80
   3 -13 -10   64.39    3.40
   0  -5 -10  154.18    4.10
   0   4 -10  123.49    4.50
   1   8 -10  266.27    7.20
   3  12 -10   81.09    7.50
   5  15 -10   16.80    9.10
   6  16 -10   20.80    9.00
   7  17 -10   52.09    9.90
   8  18 -10   16.40   11.80
   0  -4 -11   -3.80    4.60
   0   3 -11    2.50    4.30
   1   7 -11   34.60    5.20
   2  10 -11   46.20    7.80
   6  16 -11  137.39   10.10
   7  17 -11    5.60   11.30
   8  18 -11    1.40   11.40
   2 -10 -12   79.09    4.50
   0  -3 -12  142.09    5.50
   0  -2 -12  316.97    6.20
   0  -1 -12  254.87    4.80
   0   0 -12  155.68    4.60
   0   1 -12  270.17    6.80
   0   2 -12  358.46    6.80
   2   9 -12   43.10    5.80
   3  11 -12   58.69    6.70
   4  13 -12   37.90    9.60
   6 -16 -13    0.00    4.90
   1   5 -13  585.84    6.90
   1   6 -13    1.70    7.30
   5  14 -13   62.99   10.40
   6  15 -13  110.89   12.40
   7  16 -13    1.70   11.90
   3 -11 -14   15.00    6.10
   1  -5 -14  258.37    6.90
   1   4 -14  122.69    8.10
   2   8 -14   39.70    8.80
   3  10 -14   10.50    9.50
   4  12 -14   20.80   10.50
   5  13 -14    4.50    8.70
   4 -12 -15    6.20    6.80
   3 -10 -15   74.39    6.70
   2  -7 -15   40.50    6.50
   1  -3 -15   38.60    7.30
   1  -2 -15    1.30    7.90
   1  -1 -15   15.40    7.20
   1   0 -15   -0.90    7.20
   1   1 -15   21.90    8.10
   1   2 -15    4.50    8.10
   2   6 -15  118.49    6.90
   3   9 -15   22.30   10.50
   4  11 -15   48.00   11.90
   6  14 -15   48.50   14.40
   7  15 -15   29.40   14.10
   4 -11 -16   22.50    7.20
   3  -9 -16   12.20    6.80
   2  -6 -16   17.00    7.20
   2   4 -16  112.29    7.20
   2   5 -16  119.49   10.00
   3   8 -16  135.69   10.80
   4  10 -16   24.00   12.20
   5  12 -16   13.80   12.70
   6  13 -16   -1.90   10.30
   4 -10 -17   36.10    8.00
   3  -7 -17   35.40    8.20
   2  -3 -17  164.48    9.30
   2  -2 -17   48.70    8.60
   2  -1 -17  119.89    7.20
   2   0 -17   60.99    7.20
   2   1 -17  116.39    9.30
   2   2 -17   75.79   10.20
   2   3 -17  168.78    9.80
   3   6 -17    0.70    8.10
   4   9 -17   30.60   12.10
   5  11 -17   22.60   13.80
   3  -5 -18   44.80    9.60
   3   4 -18   60.29    8.60
   3   5 -18   44.50   10.80
   4   8 -18   39.00   12.10
   5  10 -18   15.40   13.80
   5  -9 -19   15.60   10.00
   4  -7 -19   23.80   10.20
   3  -2 -19   10.10   10.50
   3  -1 -19   19.40   11.70
   3   0 -19    4.60   12.50
   3   1 -19   23.00   12.30
   4   6 -19   -0.90   13.20
   5   8 -19   94.69   11.00
   6  10 -19   15.30   12.40
   5  -7 -20   30.20    9.30
   4  -4 -20   56.59   12.90
   4  -3 -20    9.90   12.10
   4   1 -20   41.70    9.90
   4   2 -20   86.59   13.50
   4   3 -20    7.50   14.00
   5   6 -20   56.69   11.20
   5   7 -20   33.70   14.40
   5  -5 -21   11.90   13.90
   5  -4 -21   19.30   10.70
   5   3 -21   28.70   11.80
   5   4 -21   17.60   16.50
  15  -4  16    7.20   11.80
  15  -3  16    6.20   16.00
  15  -2  16   22.40   13.50
  15  -1  16    1.40   13.70
  15   1  16    6.70   12.90
  15   2  16   19.80   14.60
  15   3  16    5.00   13.10
  15  -8  15   18.40   11.30
  14  -6  15    1.20   13.80
  13  -4  15   35.90   11.20
  13  -3  15   74.29   12.60
  13   2  15   14.20   10.80
  13   3  15   55.39   10.90
  13   4  15   21.70    8.40
  14   5  15  109.39   10.90
  14   6  15    6.50   10.50
  15   7  15   35.20   12.30
  15 -10  14   -0.70   16.20
  14  -9  14   36.60   14.00
  13  -8  14   57.29   12.20
  12  -6  14   74.39   11.90
  11  -4  14   37.40    7.30
  11  -3  14  142.39   10.40
  11  -2  14   23.40   10.60
  11  -1  14    9.00    9.20
  11   1  14   -8.50    8.80
  11   2  14   14.20    9.30
  11   3  14  131.89    8.80
  12   5  14   44.20    9.20
  13   7  14    9.80    9.60
  14 -11  13    3.60   15.10
  13 -10  13   58.19   13.30
  12  -9  13   20.80   11.20
  11  -7  13   13.10   10.20
  10  -5  13   57.59    9.50
  10   4  13   61.79    8.10
  11   7  13    9.90    7.30
  12   8  13   20.20    8.90
  14 -13  12    9.60   14.00
  13 -12  12   18.30   14.20
  12 -11  12   11.30   12.60
  11 -10  12  130.19    8.40
  10  -8  12    3.70    9.60
   9  -6  12   52.79    8.60
   8  -2  12  154.28    7.20
   8  -1  12   42.60    7.30
   8   0  12  114.39    7.50
   8   1  12   24.00    7.30
   8   2  12  142.19    5.40
   9   5  12   32.60    6.40
  11   9  12   58.79    7.10
  10 -10  11   38.80    9.90
   9  -9  11   17.90    6.60
   8  -6  11   71.89    7.60
   7  -3  11   80.39    6.90
   7  -2  11  275.27    7.50
   7  -1  11   -3.40    6.60
   7   1  11    5.80    6.30
   7   2  11  233.88    6.50
   8   6  11   68.59    5.70
   9   8  11  117.29    5.60
  11  11  11    7.90    6.00
  12  12  11   62.89    6.50
  13  13  11   35.20    6.80
  13 -15  10   36.80   10.60
  12 -14  10    6.90   12.50
  11 -13  10   14.40   11.60
  10 -12  10   95.39    9.90
   8  -9  10   11.00    7.40
   7  -7  10  297.77    6.00
   6  -3  10  131.59    6.00
   6  -2  10   82.79    6.20
   6   2  10   79.29    5.50
   7   6  10  280.67    5.40
   9  10  10   65.39    5.00
  14  15  10   54.79    7.40
  13 -16   9   14.90   13.10
  12 -15   9   11.40   13.10
  11 -14   9   46.70   10.00
  10 -13   9   33.80    9.30
   9 -12   9  131.49    9.40
   7  -9   9  232.98    7.40
   5  -3   9  113.49    4.40
   5  -2   9   63.29    5.70
   5  -1   9   85.39    5.60
   5   0   9    2.70    5.00
   5   1   9   76.99    4.90
   5   2   9   66.19    4.50
   6   6   9   11.60    4.20
   8  10   9   15.90    4.70
  13 -17   8   25.70   12.40
  12 -16   8   18.70   11.10
   8 -12   8   55.49    8.30
   5  -6   8    4.50    5.70
   4   0   8  405.26    4.20
   6   8   8   19.40    4.00
   7  10   8  102.49    3.30
  12 -17   7   20.30   11.90
   8 -13   7   52.99    7.60
   7 -12   7   12.30    6.80
   5  -8   7  175.98    5.90
   4  -5   7  197.98    5.60
  11 -17   6   19.20   10.90
   7 -13   6   17.50    6.80
   5 -10   6   33.70    4.00
   3  -4   6  199.78    3.60
   3   3   6   16.80    3.00
   4   7   6    4.90    2.00
   6  11   6   27.50    2.20
  10 -17   5   44.60    9.60
   9 -16   5   81.59    8.70
   8 -15   5   22.70    7.60
   7 -14   5   -3.60    6.70
   5 -11   5   31.30    5.30
   4  -9   5   20.50    4.70
   6  12   5  288.07    2.10
   3  -8   4  686.33    5.10
   2   4   4  390.66    2.20
  11 -19   3   34.60   10.00
   9 -18   2    7.70    7.40
   8 -17   2   58.39    6.60
   7 -16   2  153.28    6.30
   6 -15   2   33.70    5.20
   4 -12   2  292.07    4.50
  11 -20   1   41.50    9.00
   3 -11   1   48.50    3.20
   8 -18   0   43.70    5.80
   7 -17   0  117.79    5.10
   1  -7   0  254.37    1.90
   4  13   0  484.55    3.20
  11  20   0   -2.70    5.40
   2  10  -1  138.19    2.80
   6  16  -1    4.20    3.90
   7  17  -1   45.60    4.40
   8  18  -1   32.80    4.90
  10  20  -3   29.80    7.50
   7 -18  -4    8.90    4.10
   6 -17  -4    7.80    3.50
   0   6  -4   73.49    3.50
   1   9  -4  112.29    3.80
   2  11  -4   43.90    4.20
   8 -19  -5    3.00    4.60
   5 -16  -5  211.58    2.80
   1   9  -5  252.77    3.40
   3  13  -5  185.48    5.00
   0  -7  -6  243.78    2.20
   3  13  -6   22.30    5.40
   6  17  -6   10.30    7.50
   7  18  -6   97.69    8.60
   0  -7  -7   -1.60    2.30
   3  13  -7   57.99    6.20
   6  17  -7   10.70    8.10
   7  18  -7   20.60    8.60
   8 -19  -8   10.90    3.20
   0   6  -8  617.54    5.10
   1   9  -8   19.30    4.10
   3  13  -8   81.39    6.60
   0   6  -9   -5.50    5.70
   1   9  -9  137.19    6.30
   2  11  -9  101.79    7.10
   3  13  -9   54.39    7.00
   5 -16 -10   65.69    2.70
   1  -9 -10   37.40    3.30
   0  -6 -10  166.98    4.40
   0   5 -10  149.79    4.60
   2  11 -10   55.59    7.20
   4  14 -10  147.19    8.50
   2 -11 -11   42.20    4.30
   0  -5 -11   -3.10    4.70
   0   4 -11    1.10    4.70
   0   5 -11    2.60    6.10
   1   8 -11   52.19    7.20
   3  12 -11   95.09    6.20
   5  15 -11   30.40   10.30
   4 -14 -12   54.79    4.00
   1  -8 -12   31.60    4.60
   0  -4 -12  218.28    5.60
   0   3 -12  128.79    6.60
   1   7 -12   30.90    5.30
   2  10 -12   98.89    8.30
   3  12 -12   31.00    8.70
   6  16 -12   13.60   11.50
   7  17 -12   67.79   12.60
   5 -15 -13   50.69    5.10
   2 -10 -13   68.09    5.80
   1  -7 -13  183.48    5.70
   0  -2 -13    1.10    6.10
   0  -1 -13   -5.50    6.40
   0   0 -13   -4.60    6.80
   0   1 -13    6.20    6.50
   0   2 -13    1.60    6.80
   2   9 -13    0.80    6.00
   3  11 -13  170.18    7.50
   4  13 -13   39.40   10.50
   4 -13 -14   26.40    5.90
   2  -9 -14   54.09    5.90
   1  -6 -14  134.69    6.40
   1   5 -14  272.17    6.70
   5  14 -14    1.40   11.40
   6  15 -14   -0.40   13.20
   7  16 -14   78.39   13.50
   6 -15 -15    1.00    7.00
   2  -8 -15   21.00    6.80
   1  -4 -15  159.68    7.50
   1   3 -15   47.10    5.90
   1   4 -15  176.38    9.20
   2   7 -15   44.30    7.00
   3  10 -15   72.09   10.70
   5  13 -15  103.39   11.90
   5 -13 -16   25.60    7.20
   2  -7 -16   25.90    7.10
   1  -1 -16   23.00    7.80
   1   0 -16    2.40    7.80
   1   1 -16   15.30    8.30
   2   6 -16   17.40    9.90
   3   9 -16   10.00   11.10
   4  11 -16   15.40   13.20
   6  14 -16   54.69   13.60
   5 -12 -17    0.60    8.20
   3  -8 -17   14.80    8.40
   2  -5 -17   47.20    8.70
   2  -4 -17   97.59    6.60
   2   4 -17  108.29   10.40
   3   7 -17   32.60    8.40
   3   8 -17   13.00   10.90
   4  10 -17   29.20   13.50
   6  13 -17   38.30   16.00
   5 -11 -18   13.40    9.60
   4  -9 -18    9.30    9.80
   3  -6 -18   44.00    9.10
   2  -1 -18   56.69    9.90
   2   0 -18   -1.50   10.40
   2   1 -18   62.39   10.00
   3   6 -18   52.09   12.20
   4   9 -18    6.50   12.70
   5 -10 -19   -4.50   10.70
   4  -8 -19   17.90   10.00
   3  -4 -19   24.30   11.20
   3  -3 -19   14.50    8.20
   3   2 -19   12.10    9.20
   3   3 -19   17.70   11.50
   3   4 -19   35.40   11.50
   4   7 -19   11.80   13.70
   5   9 -19   17.00   11.70
   5  -8 -20   16.90   11.30
   4  -6 -20   56.19   11.10
   4  -5 -20    3.80   11.20
   4   4 -20   56.09   11.20
   4   5 -20    1.50   14.10
   5   8 -20   22.10   16.00
   4  -2 -21    9.50   13.40
   4  -1 -21    2.40   14.10
   4   0 -21    6.00   14.80
   4   1 -21    4.60   13.60
   5   5 -21   19.40   12.30
  16  -4  16   16.80   12.50
  16  -3  16   39.80   16.60
  16  -2  16   14.50   14.80
  15   0  16    1.90   10.60
  16   2  16    5.60   13.80
  16   3  16   30.60   14.80
  16   4  16   24.60   11.10
  15  -7  15   11.00   11.00
  15  -6  15   16.20   14.70
  14  -5  15  107.19    9.80
  14  -4  15   32.30   13.50
  13  -2  15    6.80    9.10
  13  -1  15   39.00   11.50
  13   0  15   -8.30   11.00
  13   1  15   41.40   10.80
  14   4  15   30.00   11.60
  15   6  15   38.20   12.20
  15  -9  14   51.39   16.20
  14  -8  14   20.50   13.60
  13  -7  14   12.70    9.40
  13  -6  14   40.30   11.90
  12  -5  14   50.09    8.40
  12  -4  14   48.80   11.10
  11   0  14   -2.20    7.10
  12   4  14   44.40    9.90
  13   6  14   50.69    9.40
  14   8  14    7.40   10.20
  15   9  14   69.99   10.70
  15 -11  13    3.80   15.60
  13  -9  13   58.69   12.10
  12  -8  13   14.30   11.50
  11  -6  13   34.00   10.40
  10  -4  13   57.99    7.00
  10  -3  13  115.29    9.60
  10  -2  13   45.30    8.50
  10   2  13   48.30    8.40
  10   3  13  123.59    8.50
  11   6  13   55.39    8.30
  13   9  13   72.19    9.10
  14  10  13   -1.60    8.50
  15  11  13   22.90   10.20
  14 -12  12    7.50   13.60
  13 -11  12   13.70   12.50
  12 -10  12   19.10   12.10
  11  -9  12   57.99    9.90
  10  -7  12   52.99    9.50
   9  -5  12   28.90    6.10
   9  -4  12   36.20    7.90
   9   4  12   21.10    7.10
  10   7  12   50.39    6.80
  12  10  12   17.60    7.50
  13  11  12    1.80    7.60
  14  12  12    6.30    8.20
  14 -14  11   59.19   11.40
  13 -13  11   31.20   12.50
  12 -12  11   55.29   12.90
  11 -11  11   16.50   10.80
   9  -8  11  108.69    6.40
   8  -5  11    4.00    7.90
   7   0  11   -3.20    4.90
   8   5  11    7.60    6.10
  10   9  11   24.30    6.70
  14 -15  10   54.29   15.00
  13 -14  10   10.70   12.60
  10 -11  10   18.70    9.30
   9 -10  10   76.49    8.40
   8  -8  10   -3.90    7.60
   7  -6  10  280.97    5.90
   6  -1  10  167.18    4.40
   6   0  10  128.19    4.50
   6   1  10  160.68    4.40
   8   8  10    7.30    4.70
  10  11  10   20.20    4.90
  11  12  10   18.70    6.00
  12  13  10   16.50    6.40
  13  14  10   20.70    6.60
   8 -10   9   10.30    7.90
   7  -8   9  186.58    7.40
   6  -6   9   15.00    4.60
   7   8   9  151.38    4.20
  11 -15   8   26.20   10.30
  10 -14   8   74.19    9.00
   9 -13   8   56.19    6.80
   7 -10   8  118.69    7.50
   6  -8   8   17.10    6.10
   5  -5   8   29.80    5.80
   5   5   8   32.50    3.70
  11 -16   7   19.20    9.90
  10 -15   7   15.50   10.20
   9 -14   7   12.30    8.50
   6 -10   7   51.29    4.70
   4  -4   7  292.97    5.50
   4   4   7  250.47    3.80
  13  17   7   30.00    4.60
  13 -18   6    7.40   11.60
  10 -16   6   10.70    9.00
   9 -15   6   22.80    8.90
   8 -14   6    4.30    5.60
   6 -11   6   38.60    5.90
   4  -7   6    3.70    4.80
   3  -3   6   15.90    3.20
   3   2   6  227.48    3.50
   5   9   6   90.49    2.50
   3  -6   5    2.70    3.10
   4 -10   4   58.59    4.20
   2  -4   4  452.55    3.90
  10 -18   3   15.90    8.90
   9 -17   3   96.09    8.50
   2  -6   3  120.19    3.30
   3 -10   2    1.00    3.30
  10 -19   1   56.59    8.10
   5 -14   1   47.70    4.10
   5  14   1   56.09    2.50
  10  19   1   57.99    4.00
  11 -20   0    0.20    9.10
   9 -19  -1   -6.60    6.30
   5 -15  -1   96.59    3.60
   3 -12  -1    3.50    2.80
   3  12  -1    8.70    2.90
   5  15  -1  107.29    3.70
   9  19  -1    5.60    5.40
  10 -20  -2   14.30    7.50
   4 -14  -2   87.19    3.00
   0   5  -2  989.90    3.40
   4  14  -2   94.59    4.00
  10  20  -2   18.10    6.90
   0  -6  -3   -1.30    0.60
   1   9  -3  178.88    3.20
   2  11  -3  157.88    3.70
   3  13  -4   94.79    4.40
   6  17  -4    7.90    5.70
   7  18  -4    6.30    6.80
   0  -7  -5    2.20    1.50
  -1   0  -5    5.70    3.40
   5  16  -5  230.18    6.20
   6  17  -5    8.90    6.10
   7  18  -5   33.90    6.70
   8  19  -5    3.00    7.90
   8 -19  -6    4.80    4.00
  -1  -2  -6  745.33    4.10
  -1  -1  -6   69.69    3.40
  -1   0  -6    4.40    2.70
  -1   1  -6   78.69    3.80
   0   7  -6  293.67    4.80
   5  16  -6   73.89    6.80
   8  19  -6    2.60    8.00
   8 -19  -7   23.10    3.90
   2 -12  -7  165.58    1.60
   1 -10  -7  130.29    2.00
  -1  -2  -7   95.99    3.60
  -1  -1  -7  385.16    3.50
  -1   0  -7   -1.60    3.00
  -1   1  -7  393.66    4.70
  -1   2  -7  102.89    4.60
   0   7  -7   -6.80    4.80
   5  16  -7   74.69    7.30
   8  19  -7   24.10    8.70
   2 -12  -8   18.90    2.20
   0  -7  -8  291.17    3.00
  -1  -2  -8  237.28    4.30
  -1  -1  -8  140.89    4.60
  -1   0  -8    1.90    4.30
  -1   1  -8  146.99    5.10
   0   7  -8  360.16    5.80
   5  16  -8   23.30    7.80
   6  17  -8   31.90    7.70
   7  18  -8   25.40    9.40
   8  19  -8    5.20   10.10
   0  -7  -9    1.90    3.80
  -1  -1  -9   18.70    4.40
  -1   0  -9    3.00    4.80
   5  16  -9  121.59    9.00
   6  17  -9    4.40    9.40
   7  18  -9   22.50   10.40
   8  19  -9   -6.20    9.80
   0   6 -10  171.58    4.80
   1   9 -10   50.79    5.20
   3  13 -10   93.59    8.30
   6  17 -10   42.40    9.30
   7  18 -10   89.79   10.40
   3 -13 -11   20.90    3.60
   1  -9 -11    7.50    3.70
   0  -6 -11    4.10    4.50
   1   9 -11   10.20    6.90
   2  11 -11   51.99    8.10
   4  14 -11   17.40    6.50
   0  -5 -12   -5.20    5.10
   0   4 -12  225.68    5.50
   0   5 -12    1.00    6.70
   1   8 -12   47.30    7.20
   4  14 -12   74.29    9.90
   5  15 -12   39.10   10.00
   3 -12 -13   16.70    4.40
   0  -4 -13    0.20    5.70
   0  -3 -13    2.50    5.30
   0   3 -13   -5.80    7.10
   1   7 -13  178.48    6.00
   2  10 -13   82.39    8.90
   3  12 -13   15.00   10.10
   5  15 -13   52.49   11.10
   6  16 -13   11.40   12.70
   7  17 -13   -5.10   13.70
   1  -7 -14  142.69    7.00
   0  -1 -14  395.26    7.50
   0   0 -14  245.38    7.70
   0   1 -14  397.46    7.80
   1   6 -14  146.49    6.30
   2   9 -14   56.89    6.90
   3  11 -14    3.70    7.50
   4  13 -14   28.00   11.80
   5 -14 -15    3.30    6.50
   1  -5 -15   35.60    6.80
   1   5 -15   37.70    8.70
   2   8 -15   16.30    7.30
   4  12 -15    6.10    9.30
   5  14 -15    4.70   11.90
   6  15 -15    2.00   15.10
   3 -10 -16    3.30    7.30
   1  -3 -16   14.80    8.30
   1  -2 -16    7.10    5.90
   1   2 -16    0.80    6.30
   1   3 -16   20.90    9.10
   2   7 -16   21.90    9.50
   5  13 -16   40.40   13.90
   4 -11 -17   34.30    8.50
   3  -9 -17   34.20    7.40
   2  -6 -17   46.50    9.10
   2   5 -17   42.30    7.50
   2   6 -17   50.29   10.60
   5  12 -17    2.90   11.10
   4 -10 -18   27.90   10.10
   3  -7 -18  131.39    9.10
   2  -4 -18   30.60    9.10
   2  -3 -18   15.60    9.60
   2  -2 -18    6.40    7.30
   2   2 -18   13.80    7.90
   2   3 -18   29.30   10.60
   2   4 -18   37.30   10.70
   3   7 -18  132.29   12.50
   5  11 -18   10.10   11.80
   3  -5 -19   16.00   10.00
   3   5 -19   13.50   12.70
   4   8 -19   12.90   12.90
   5  10 -19   15.00   15.20
   4  -7 -20   30.50   11.40
   3  -2 -20   67.29   12.60
   3  -1 -20   14.60   12.50
   3   0 -20   -5.00   13.20
   3   1 -20   10.00   13.40
   3   2 -20   69.69   13.80
   4   6 -20   57.69   13.70
   4  -4 -21   22.40   13.70
   4  -3 -21   25.80   13.30
   4   2 -21   -2.90   11.20
   4   3 -21   17.70   14.90
   4   4 -21   12.30   16.50
  16  -1  16   25.50   11.50
  16   0  16   23.50   11.20
  16   1  16   20.70   11.20
  16  -7  15   14.80   12.40
  16  -6  15   -2.40   16.30
  15  -5  15   15.60   13.10
  15  -4  15   13.50   13.40
  14  -3  15   88.79   10.30
  14  -2  15   -1.60   13.30
  14  -1  15    2.70   12.90
  14   0  15   44.00   12.80
  14   1  15    7.80   12.70
  14   2  15    1.70   12.00
  14   3  15   90.09    9.20
  15   4  15    2.50   11.60
  15   5  15   19.70   12.30
  16   6  15   -1.10   11.80
  15  -8  14    6.50   14.60
  14  -7  14   15.40   13.10
  13  -5  14   37.20   11.70
  12  -3  14  139.69    8.30
  12  -2  14   15.80   10.50
  12  -1  14  138.29   10.70
  12   0  14   37.70   10.40
  12   1  14  142.19   10.70
  12   2  14    5.20    9.80
  12   3  14  135.09    7.20
  13   5  14   34.50   10.60
  14   7  14    3.10   10.50
  15   8  14    1.60   10.30
  14 -10  13    2.50   10.60
  13  -8  13   83.39   11.30
  12  -7  13    5.50   10.30
  11  -5  13   -1.20    9.40
  11  -4  13   96.29    9.30
  10  -1  13   14.90    6.40
  10   0  13   32.80    6.10
  10   1  13   18.40    6.00
  11   5  13   14.10    7.90
  12   7  13    0.80    8.50
  11  -8  12  125.29   10.00
  10  -6  12    8.90    9.00
   9  -3  12   46.40    7.90
   9  -2  12   27.60    7.80
   9   2  12   16.60    7.10
   9   3  12   43.90    7.30
  10   6  12    4.30    7.10
  11   8  12  110.69    7.50
  14 -13  11   -2.90   14.60
  13 -12  11    8.10   12.20
  12 -11  11   13.30   10.90
  11 -10  11   -1.90   10.80
  10  -9  11   28.10    7.10
   9  -7  11    9.60    7.70
   8  -4  11   49.40    7.50
   8   4  11   43.40    6.00
   9   7  11    5.40    5.80
  11  10  11   10.70    7.00
  14  13  11   -3.30    8.50
  12 -13  10   16.90    9.10
  11 -12  10   18.80    7.70
   9  -9  10   27.50    8.40
   8  -7  10   34.80    7.70
   7  -5  10  372.56    5.90
   7  -4  10   55.89    6.60
   7   5  10  345.07    5.40
   9   9  10   23.00    5.60
  13 -15   9   64.19   13.50
  12 -14   9   18.80   12.00
  11 -13   9   45.50    9.80
  10 -12   9   36.80    9.70
   9 -11   9   45.50    8.10
   6  -5   9  244.88    5.30
   6   5   9  253.77    4.60
   9  11   9   35.60    4.20
  13  15   9   58.29    5.90
  13 -16   8   22.90   12.60
   8 -11   8  110.39    8.00
   5  -4   8    8.80    5.60
   8  11   8  103.19    4.30
  13  16   8   20.50    5.60
  13 -17   7   25.90   12.30
   7 -11   7  113.99    7.00
   6  -9   7  238.08    6.10
   5  -7   7   49.40    5.30
   4  -3   7  262.67    5.50
   5   7   7   25.40    3.40
   7  11   7  107.69    3.20
  12 -17   6   18.50   11.30
   7 -12   6   56.79    6.80
   5  -9   6   97.09    4.00
   3  -2   6  214.08    3.40
   3  -1   6   45.60    4.10
   3   0   6    2.60    3.80
   3   1   6   47.10    3.50
  12 -18   5   12.10   10.60
  11 -17   5   30.90    9.30
   6 -12   5  304.07    4.90
   4  -8   5  257.47    5.00
   3  -5   5   96.29    4.50
   3  -7   4   69.19    4.20
   2  -3   4   85.69    3.60
  11 -19   2   43.40    9.50
   5 -13   2    8.60    4.40
   3  10   2    2.20    0.90
   9 -18   1   35.80    7.10
   8 -17   1    6.40    7.00
   7 -16   1   24.70    5.90
   6 -15   1   18.90    4.90
   4 -13   0  472.05    4.00
   8 -18  -1   33.90    5.40
   7 -17  -1   47.70    5.30
   6 -16  -1    4.20    3.90
   2 -10  -1  133.39    2.10
   0   4  -1   -6.80    1.70
   9 -19  -2   31.40    6.70
  10 -20  -3   26.40    7.10
   2 -11  -3  149.59    1.60
   0   6  -3   -1.20    2.00
   3  13  -3   24.00    3.70
   6  17  -3   14.50    5.40
   7  18  -3   20.00    5.80
   5  16  -4   36.10    5.00
   8  19  -4    0.30    7.30
   7 -18  -5   32.10    3.80
   6 -17  -5    3.40    3.30
  -1  -2  -5  260.67    3.00
  -1  -1  -5  136.89    2.50
  -1   1  -5  133.59    2.70
  -1   2  -5  283.57    3.90
   0   7  -5    2.00    2.90
   1  10  -5  117.09    4.40
   2  12  -5  270.87    5.10
   4  15  -5   23.70    5.30
   9  20  -5   28.70    8.30
   5 -16  -6   69.89    2.30
   1 -10  -6  246.98    1.50
  -1   2  -6  679.83    4.10
  -1   3  -6  376.56    4.80
   1  10  -6  308.67    5.10
   2  12  -6  384.76    5.70
   4  15  -6   16.00    6.20
   9  20  -6    8.20    8.60
  -1  -3  -7  354.96    3.80
  -1   3  -7  401.76    5.10
   1  10  -7  157.18    5.30
   2  12  -7  200.78    5.80
   4  15  -7    4.30    6.40
   1 -10  -8  430.06    2.90
  -1  -3  -8   72.99    3.80
  -1   2  -8  227.68    3.90
  -1   3  -8   79.59    5.40
   1  10  -8  496.15    6.30
   2  12  -8   22.50    6.20
   4  15  -8  127.69    7.20
   4 -15  -9   54.99    1.90
   2 -12  -9   71.49    2.70
   1 -10  -9   28.10    2.80
  -1  -2  -9  711.83    5.40
  -1   1  -9   13.50    3.70
  -1   2  -9  727.83    6.30
  -1   3  -9  131.79    5.40
   0   7  -9   -2.00    3.90
   1  10  -9   38.70    6.40
   2  12  -9   74.09    7.30
   4  15  -9   83.39    8.30
   0  -7 -10  290.17    4.30
  -1  -2 -10   81.69    4.60
  -1  -1 -10   19.60    4.80
  -1   0 -10    5.30    5.00
  -1   1 -10   12.00    5.40
  -1   2 -10   78.29    5.70
   0   7 -10  346.77    6.90
   1  10 -10   58.79    6.70
   2  12 -10   20.40    7.20
   4  15 -10   57.59    9.10
   5  16 -10   73.99    9.10
   6 -17 -11   39.10    2.80
   0   6 -11    0.40    4.90
   3  13 -11   17.00    6.40
   5  16 -11   37.70   10.40
   6  17 -11   43.70   11.10
   7  18 -11    5.20   12.00
   2 -11 -12    9.80    3.90
   1  -9 -12    4.60    4.80
   0  -6 -12   91.19    4.70
   0   6 -12  101.79    7.30
   1   9 -12   10.90    7.90
   2  11 -12   -3.20    8.80
   3  13 -12   74.29    9.50
   4 -14 -13   31.30    5.10
   1  -8 -13    5.90    5.00
   0  -5 -13   -3.40    5.40
   0   4 -13    7.10    5.30
   0   5 -13    4.70    7.30
   1   8 -13   -3.70    5.90
   4  14 -13   37.10   10.40
   6 -16 -14    3.50    5.50
   2 -10 -14   80.59    6.40
   0  -3 -14  810.02    8.50
   0  -2 -14   71.69    5.30
   0   2 -14   71.59    5.50
   0   3 -14  829.42    9.10
   1   7 -14  146.39    6.90
   2  10 -14   85.59    9.60
   3  12 -14   33.30   10.90
   5  15 -14   63.89   12.30
   6  16 -14    3.50   13.80
   4 -13 -15    5.00    6.80
   3 -11 -15   51.69    6.10
   2  -9 -15   55.49    6.80
   1  -6 -15  307.77    7.40
   1   6 -15  308.87    9.20
   2   9 -15   61.19    9.80
   3  11 -15   53.29    8.40
   4  13 -15    8.50   13.00
   4 -12 -16   16.80    6.90
   2  -8 -16    7.40    7.50
   1  -5 -16   13.50    7.30
   1  -4 -16  208.28    6.40
   1   4 -16  220.88    7.60
   1   5 -16   16.10    9.60
   2   8 -16    2.50    9.90
   3  10 -16   11.60    8.80
   4  12 -16   20.90   12.40
   5 -13 -17   13.40    8.40
   2  -7 -17   33.80    8.30
   1  -2 -17   58.09    9.40
   1  -1 -17   37.00    9.50
   1   0 -17    8.00    9.70
   1   1 -17   44.10    9.70
   1   2 -17   49.10   10.10
   2   7 -17   24.20   11.30
   3   9 -17   31.80    9.10
   4  11 -17   31.50   10.70
   5  13 -17   17.00   15.40
   5 -12 -18   25.70    9.10
   3  -8 -18    1.90    9.40
   2  -5 -18   20.50   10.10
   2   5 -18   22.70   11.50
   3   8 -18    5.90   11.90
   4  10 -18   33.70   10.70
   5  12 -18   24.10   16.20
   4  -9 -19   11.60   10.60
   3  -6 -19   75.19    7.90
   2  -2 -19  152.88   11.60
   2  -1 -19   17.60   11.80
   2   0 -19   86.09   12.50
   2   1 -19   27.10   12.30
   2   2 -19  134.49   12.80
   3   6 -19   73.19    9.70
   3   7 -19   84.89   12.70
   4   9 -19   22.60   14.00
   3  -4 -20   37.10   12.30
   3  -3 -20   -3.70    9.50
   3   3 -20    0.90   10.30
   3   4 -20   31.00   14.70
   3   5 -20   36.10   13.20
   4   7 -20   25.40   11.20
   4   8 -20    9.20   14.20
   4  -6 -21   14.70   12.30
   4  -5 -21   13.20   12.40
   4   5 -21    5.00   15.60
   4   6 -21    9.30   15.00
  16  -5  15   10.00   14.80
  16  -4  15   14.70   14.60
  15  -3  15   -7.20   13.40
  15  -2  15    4.20   14.30
  15  -1  15    7.90   12.90
  15   0  15   -9.70   12.50
  15   1  15    7.00   12.00
  15   2  15    8.30   12.60
  15   3  15    9.10   13.20
  16   5  15    6.60   12.80
  16  -8  14   31.70   16.10
  15  -7  14   82.89   14.10
  14  -6  14   -1.90   12.00
  14  -5  14    1.30   11.70
  13  -4  14    8.30    8.60
  13  -3  14   10.60   11.50
  13   3  14    4.20    9.40
  13   4  14    9.70   10.10
  14   6  14   -1.80   10.80
  15 -10  13   16.40   11.60
  14  -9  13   29.00   10.00
  13  -7  13  152.48   11.20
  12  -6  13   19.70    7.70
  11  -3  13   15.10    9.80
  11  -2  13   53.59    9.40
  11   2  13   45.50    8.70
  11   3  13   21.10    8.30
  11   4  13   84.79    6.30
  12   6  13   33.80    8.90
  13   8  13   90.89    8.70
  14   9  13   33.40    9.80
  15  10  13   11.10   10.10
  15 -12  12   23.30   11.70
  14 -11  12   20.40   13.10
  13 -10  12   15.20    9.20
  12  -9  12   57.29    8.50
  11  -7  12   32.70    9.80
  10  -5  12   15.50    8.50
   9  -1  12    8.20    5.90
   9   0  12    2.80    5.40
   9   1  12   11.40    5.30
  10   5  12   18.90    7.10
  11   7  12   25.30    7.20
  12   9  12   65.49    7.60
  13  10  12   17.00    7.90
  14  11  12   13.60    8.80
  15  12  12    6.10    9.00
  15 -13  11    7.10   13.90
  10  -8  11   67.69    9.00
   9  -6  11   25.40    7.80
   8  -3  11    6.50    5.20
   8  -2  11   61.39    7.10
   8  -1  11  200.58    7.20
   8   2  11   52.49    6.40
   8   3  11   -0.70    5.90
   9   6  11   34.30    6.10
  10   8  11   62.19    6.10
  12  11  11   12.20    6.50
  13  12  11    7.80    6.70
  14 -14  10    5.30   13.10
  13 -13  10   18.50   12.90
  12 -12  10   81.19   11.00
  11 -11  10   66.99   10.50
  10 -10  10   84.49    9.30
   8  -6  10   72.69    7.20
   7  -3  10  291.37    6.80
   7   3  10  301.07    5.70
   7   4  10   57.99    4.90
   8   7  10   30.40    5.00
  14 -15   9    4.60   14.20
   8  -9   9   47.20    5.60
   7  -7   9  156.68    5.60
   6  -4   9  202.58    4.90
   6  -3   9  350.36    6.60
   6   4   9  204.68    4.70
   7   7   9  148.69    4.50
   8   9   9   40.60    4.80
  10  12   9   37.40    4.40
  11  13   9   43.20    5.40
  12  14   9   17.20    5.60
  14 -16   8    9.10   12.90
  12 -15   8   32.20    8.60
  11 -14   8   45.10    9.40
  10 -13   8  229.68    9.80
   9 -12   8   10.90    6.20
   7  -9   8   89.59    5.40
   6  -7   8   50.09    4.60
   5  -3   8  134.99    5.70
   5   4   8    0.40    2.70
   6   7   8   49.60    3.80
  12 -16   7   14.50    8.30
  11 -15   7   37.20   10.60
  10 -14   7   64.19    9.30
   9 -13   7   46.30    8.40
   8 -12   7  130.49    5.80
   4  -2   7   23.40    4.70
   4   2   7   27.50    4.00
   4   3   7  214.78    3.10
   6   9   7  219.78    3.70
  11 -16   6   35.50   10.30
  10 -15   6  104.99    9.70
   9 -14   6   51.79    8.10
   8 -13   6   74.79    7.70
   6 -10   6  122.39    5.60
   4  -6   6   44.00    3.50
   4   6   6   43.70    2.70
  12  17   6   10.50    4.00
  13 -18   5   33.80   11.40
  10 -16   5   50.19    9.30
   9 -15   5   15.00    8.20
   8 -14   5   -4.30    7.20
   7 -13   5   18.40    4.60
   5 -10   5  353.56    4.40
   3   5   5   88.49    2.20
   4   8   5  223.38    2.20
   5 -11   4   65.39    5.00
   4  -9   4  194.38    4.40
   2   3   4   66.39    2.00
  10 -18   2   40.80    8.00
   6 -14   2   43.50    5.60
   4 -12   1  120.39    4.50
   3  11   1   57.29    1.70
  10 -19   0   70.99    7.80
   1   7   0  265.17    2.00
   6  16   0   25.60    3.50
   7  17   0  122.19    3.70
   8  18   0   44.50    4.20
  11 -20  -1   38.60    9.10
   1   8  -1  418.26    2.50
   5 -15  -2   72.69    3.70
   2  11  -2   82.39    3.00
   5  16  -3  109.19    5.30
   8  19  -3   21.00    6.70
   3 -13  -4   88.19    1.70
  -1  -1  -4  590.94    3.30
  -1   0  -4    5.90    3.10
  -1   1  -4  603.84    3.90
   0   7  -4  487.45    3.50
   1  10  -4   44.80    3.70
   2  12  -4  453.35    4.90
   4  15  -4    3.30    4.80
   9  20  -4   11.10    7.70
  -1   3  -5   28.10    3.50
   7 -18  -6   92.69    3.70
  -1  -3  -6  312.37    3.10
  -1   4  -6  178.58    4.60
   0   8  -6  484.75    5.30
   3  14  -6  122.19    5.90
  -1   4  -7  167.58    5.00
   0   8  -7   -3.40    4.90
   3  14  -7  101.39    6.50
  -1   4  -8  348.77    6.00
   0   8  -8  153.58    5.80
   3  14  -8   49.20    6.80
  -1  -3  -9  117.79    3.20
  -1   4  -9  248.28    6.00
   0   8  -9    8.80    5.80
   3  14  -9   48.50    7.70
   2 -12 -10   11.50    3.50
   1 -10 -10   39.30    3.40
  -1  -3 -10   82.79    4.70
  -1   3 -10   89.09    5.70
   0   8 -10  517.55    7.40
   3  14 -10  143.49    8.40
   5 -16 -11   32.80    3.20
   0  -7 -11    0.10    4.00
  -1  -2 -11   34.90    5.10
  -1  -1 -11  153.48    5.40
  -1   0 -11   -0.80    3.80
  -1   1 -11  152.08    4.30
  -1   2 -11   35.20    5.80
   0   7 -11   -0.20    5.10
   1  10 -11   71.29    7.80
   2  12 -11   87.99    8.40
   4  15 -11   43.70   10.30
   3 -13 -12   65.49    4.30
   0   7 -12  161.48    7.40
   4  15 -12   71.99   10.10
   5  16 -12   12.20   11.30
   6  17 -12   20.60   11.00
   2 -11 -13   93.19    5.40
   0   6 -13    4.60    7.70
   1   9 -13   32.70    8.40
   2  11 -13  111.09    7.30
   3  13 -13   44.80   10.60
   6  17 -13   11.50   11.60
   5 -15 -14   45.40    5.10
   3 -12 -14   20.30    5.10
   1  -8 -14   16.90    5.60
   0  -4 -14   95.99    7.00
   0   4 -14   97.79    5.90
   0   5 -14  236.68    8.90
   1   8 -14   27.30    6.30
   4  14 -14   17.50   12.10
   1  -7 -15   13.20    6.70
   0  -3 -15    4.60    7.10
   0  -2 -15    6.30    7.60
   0  -1 -15    1.00    5.50
   0   0 -15    6.70    5.50
   0   1 -15    8.40    5.70
   0   2 -15   -9.50    7.60
   0   3 -15    7.30    8.10
   1   7 -15   23.80    7.00
   2  10 -15    9.70   10.80
   3  12 -15   48.80   12.70
   5  15 -15   88.09   13.30
   5 -14 -16   36.80    7.60
   1  -6 -16  131.69    7.30
   1   6 -16  151.68   10.10
   2   9 -16   44.90   11.00
   3  11 -16  -15.20   12.00
   4  13 -16   57.19   13.80
   5  14 -16   37.00   10.50
   3 -10 -17   38.20    8.00
   1  -4 -17   49.80    8.80
   1  -3 -17   70.89    6.80
   1   3 -17   67.89    7.60
   1   4 -17   44.20    9.80
   2   8 -17   27.60   11.30
   3  10 -17   50.99    9.40
   4  12 -17    3.00   14.80
   4 -11 -18   22.50    9.60
   3  -9 -18   67.79    8.90
   2  -6 -18   25.10    9.60
   1  -1 -18    4.60    9.80
   1   0 -18   -1.40    9.60
   1   1 -18   -9.00    9.80
   2   6 -18   26.50    8.60
   3   9 -18   72.49   12.80
   4  11 -18   17.30   14.20
   4 -10 -19   -0.80   10.90
   3  -7 -19   76.59   10.00
   2  -4 -19   70.09   11.30
   2  -3 -19   71.29    7.70
   2   3 -19   77.29    9.20
   2   4 -19   78.79   12.30
   2   5 -19   26.70   11.20
   3   8 -19   77.79   13.70
   4  10 -19    0.80   16.50
   4  -8 -20    2.80   10.90
   3  -6 -20   42.70   10.80
   3  -5 -20   41.40   10.90
   3   6 -20   39.20   14.10
   4   9 -20   35.50   15.40
   3  -3 -21  111.29   13.10
   3  -2 -21    9.20   14.30
   3  -1 -21   22.50   12.80
   3   0 -21   -2.30   10.10
   3   1 -21   31.60   13.70
   3   2 -21    0.90   14.80
   3   3 -21  110.49   16.10
  17  -4  15   13.30   15.70
  16  -3  15   13.20   14.10
  16  -2  15   54.49   15.00
  16  -1  15   17.50   13.60
  16   2  15   43.20   13.40
  16   3  15   20.90   14.20
  16   4  15    3.00   12.70
  16  -7  14   65.49   15.10
  15  -6  14   26.20   13.60
  14  -4  14   -8.60   11.80
  13  -2  14  105.09    8.70
  13  -1  14   22.90   10.80
  13   0  14   -4.00   10.60
  13   1  14   16.30   10.90
  13   2  14   87.99    9.80
  14   4  14   15.90   10.30
  14   5  14   -4.70   10.70
  15   6  14   31.60   10.60
  15   7  14   45.70   10.60
  16   8  14   39.00   12.30
  16 -10  13    6.80   12.50
  15  -9  13   16.50   13.10
  14  -8  13   50.29    9.70
  13  -6  13    2.00   11.40
  12  -5  13    9.70    7.70
  12  -4  13   94.49   10.10
  11  -1  13   12.40    6.50
  11   0  13    1.90    6.20
  11   1  13   13.20    6.70
  12   5  13   15.00    8.70
  13   7  13  156.18    9.50
  14   8  13   56.79    9.30
  15 -11  12   24.30   15.00
  14 -10  12   25.80   13.80
  13  -9  12   57.59   12.10
  12  -8  12   11.40    7.50
  11  -6  12  172.58   10.00
  10  -4  12   37.00    6.20
  10  -3  12  163.68    8.60
  10   3  12  164.08    7.80
  10   4  12   33.20    7.10
  12   8  12   14.00    8.30
  14 -12  11   38.60   12.90
  13 -11  11   38.60   12.70
  12 -10  11   12.00   10.50
  11  -9  11   13.80    7.50
  10  -7  11  100.49    9.30
   9  -5  11  139.79    6.30
   8   0  11  131.79    5.30
   8   1  11  170.58    5.40
   9   5  11  153.98    6.30
  11   9  11   20.70    7.40
  15 -14  10    8.90   15.10
  10  -9  10    3.60    8.30
   9  -8  10   28.50    5.90
   8  -5  10  195.68    7.30
   7  -2  10    5.40    4.60
   7  -1  10  123.79    6.20
   7   0  10   -7.20    5.60
   7   1  10  125.79    6.00
   7   2  10    8.00    5.60
   8   6  10   65.59    5.40
  10  10  10   79.09    5.40
  14  14  10   18.70    7.60
  13 -14   9   19.20   11.40
  12 -13   9   74.59   11.80
  11 -12   9   67.09   10.30
  10 -11   9   15.70    9.10
   9 -10   9    8.80    5.80
   8  -8   9    4.30    7.10
   7  -6   9   50.99    6.40
   6  -2   9  164.48    6.00
   6  -1   9  567.24    6.40
   6   2   9  168.38    5.30
   6   3   9  306.87    4.90
  13 -15   8   -3.20   12.90
   8 -10   8   11.00    7.00
   7  -8   8  296.47    7.40
   6  -6   8   46.60    5.70
   5  -2   8   59.29    3.90
   5  -1   8  173.98    5.50
   5   1   8  167.18    4.70
   5   2   8   55.79    4.30
   5   3   8  113.79    3.20
   7   9   8   83.59    3.50
   9  12   8    5.70    4.10
  10  13   8  215.08    4.80
  11  14   8   27.20    5.00
  12  15   8   32.90    4.70
  13 -16   7   13.00   12.10
   7 -10   7   47.00    6.30
   6  -8   7  250.17    6.10
   5  -6   7  254.17    4.40
   4  -1   7   22.40    3.40
   4   0   7  499.25    5.00
   4   1   7   17.30    4.10
   8  12   7  117.99    3.60
  12  16   7   17.70    4.20
  13 -17   6    3.60   12.10
   5  -8   6   40.50    3.80
   4  -5   6  256.07    5.30
   7  12   6   48.00    2.40
  12 -17   5   41.40   10.20
   6 -11   5   70.09    5.70
   4  -7   5   31.50    4.40
   3  -4   5  209.58    4.40
   5  10   5  330.87    2.20
  11  17   5   17.20    2.80
  12 -18   4    7.20    9.80
   6 -12   4   54.69    5.20
   2  -2   4  527.05    3.40
   2  -1   4  198.98    3.60
   2   2   4  517.55    2.90
   3   7   4   63.09    1.40
  10  17   4    3.60    2.00
   2  -5   3  283.17    2.70
  12 -19   2    7.50   10.80
   9 -17   2   36.90    7.20
   8 -16   2   56.89    6.80
   7 -15   2    7.60    5.70
   1   3   2   43.60    1.00
  11 -19   1   36.20    8.90
   3 -10   1  197.68    3.70
   2  -8   1   42.80    2.40
   9 -18   0   77.69    6.60
   5 -14   0   24.20    3.60
   3 -11   0   16.50    2.60
   2  -9   0    9.00    1.90
   4  14  -1  178.28    3.50
  10  20  -1   15.20    5.50
   8 -18  -2   15.80    4.90
   7 -17  -2   46.00    5.20
   6 -16  -2   47.10    4.30
   0   6  -2  738.63    3.20
   1   9  -2  527.95    3.30
   3  13  -2   42.50    3.20
   6  17  -2   28.20    4.50
   7  18  -2  151.38    5.20
   9 -19  -3   30.30    6.10
   4 -14  -3   15.80    2.80
   0   7  -3    3.40    2.90
   4  15  -3   79.29    5.20
   9  20  -3   15.60    6.90
  10 -20  -4    9.50    6.80
  -1  -2  -4  377.56    2.70
  -1   2  -4  358.36    3.10
  -1  -3  -5   19.30    2.40
  -1   4  -5  261.37    4.30
   0   8  -5    2.90    4.10
   3  14  -5   45.90    4.80
   6 -17  -6   14.60    3.10
  -1  -4  -6  152.18    3.00
   1  11  -6  240.28    5.10
   5  17  -6   46.20    7.60
   6  18  -6   -0.30    7.60
   7 -18  -7   27.70    3.30
   5 -16  -7   67.39    2.10
  -1  -4  -7  144.89    3.10
  -1   5  -7   37.90    5.00
   1  11  -7  262.97    5.80
   2  13  -7   94.59    5.80
   5  17  -7  124.19    7.60
   6  18  -7   25.60    7.80
   7  19  -7    3.30    9.40
   0  -8  -8  136.99    2.90
  -1  -4  -8  306.07    3.10
  -1   5  -8  130.89    5.50
   1  11  -8  216.18    6.20
   2  13  -8   13.70    6.70
   5  17  -8  127.69    8.30
   6  18  -8    4.20    9.00
   7  19  -8   66.19    9.70
   0  -8  -9    3.10    3.40
  -1  -4  -9  208.38    4.10
  -1   5  -9   93.39    5.80
   1  11  -9  224.88    7.20
   2  13  -9   27.00    7.00
   5  17  -9   34.30    9.30
   6  18  -9   19.40    9.90
   7  19  -9   12.10   10.60
   4 -15 -10   45.80    2.60
  -1  -4 -10   37.10    4.30
  -1   4 -10   44.60    4.30
  -1   5 -10  151.48    6.10
   1  11 -10   53.59    7.60
   5  17 -10   22.00    9.10
   6  18 -10   11.50   10.90
   7  19 -10   34.60   12.20
   1 -10 -11   60.09    4.20
  -1  -3 -11  234.98    5.30
  -1   3 -11  233.78    4.90
  -1   4 -11  325.97    6.60
   0   8 -11    0.40    7.10
   3  14 -11   52.79    8.60
   0  -7 -12  136.39    4.90
  -1  -2 -12  149.79    5.90
  -1  -1 -12   22.00    4.20
  -1   0 -12   -4.90    4.30
  -1   1 -12   20.00    4.70
  -1   2 -12  141.09    4.80
  -1   3 -12  101.29    6.80
   1  10 -12   26.60    5.70
   2  12 -12   28.00    6.70
   3  14 -12   24.90    9.50
   1  -9 -13   33.40    4.90
   0  -6 -13   -5.80    5.40
  -1   0 -13    0.80    6.40
  -1   1 -13   39.70    6.70
   0   7 -13   -0.20    7.80
   1  10 -13   72.89    8.20
   2  12 -13   58.39    9.80
   4  15 -13    1.10   11.90
   5  16 -13   38.70   11.10
   0  -5 -14  205.38    6.50
   0   6 -14   26.20    8.70
   1   9 -14  125.79    9.40
   2  11 -14    7.70    7.90
   3  13 -14    9.10   11.70
   5  16 -14   22.70   12.60
   2 -10 -15    4.50    6.30
   0  -4 -15   -5.10    7.00
   0   4 -15    4.60    6.00
   0   5 -15    5.00    8.60
   1   8 -15   17.20    7.00
   4  14 -15   23.80   12.70
   3 -11 -16    2.10    6.90
   2  -9 -16   55.09    7.30
   0  -2 -16  292.07    8.90
   0  -1 -16    6.00    8.40
   0   0 -16   88.49    8.30
   0   1 -16   -3.80    8.60
   0   2 -16  302.47    9.30
   0   3 -16   60.49    9.00
   1   7 -16   10.10    9.40
   2  10 -16   20.20   11.50
   3  12 -16   20.60   13.30
   5  15 -16    8.10   14.10
   4 -12 -17   10.60    7.90
   2  -8 -17   25.60    8.10
   1  -5 -17   56.09    8.70
   1   5 -17   57.69    7.50
   1   6 -17   20.70   11.00
   2   9 -17   -2.50   12.00
   3  11 -17    2.00   14.20
   4  13 -17    8.70   13.60
   2  -7 -18   29.40    9.30
   1  -3 -18   58.69    9.50
   1  -2 -18   16.50    9.10
   1   2 -18   13.10    7.80
   1   3 -18   69.89   10.30
   1   4 -18    3.90   11.50
   2   7 -18   18.10    8.90
   2   8 -18   -4.20   11.50
   3  10 -18    5.70   14.80
   4  12 -18   55.09   16.20
   3  -8 -19   70.59   10.80
   2  -5 -19   28.10   10.70
   2   6 -19   11.20   13.00
   3   9 -19    6.60   14.50
   4  11 -19    5.90   17.30
   4  -9 -20   31.70   11.90
   3  -7 -20   18.00   11.00
   2  -3 -20    4.60   11.70
   2  -2 -20    5.50   12.20
   2  -1 -20    0.40   11.60
   2   0 -20  132.89    9.80
   2   1 -20    1.60    9.90
   2   2 -20   10.40   12.30
   2   3 -20   -0.60   14.20
   2   4 -20   51.59   13.10
   3   7 -20   17.50   14.00
   3  -5 -21   35.40   11.80
   3  -4 -21   30.70   13.70
   3   4 -21   37.50   11.90
   3   5 -21   26.90   16.40
   3   0 -22    0.40   14.50
   3   1 -22   12.30   14.80
  17  -3  15   10.70   15.70
  17  -2  15   28.40   16.40
  17  -1  15   -9.30   14.20
  16   0  15  173.48   11.30
  17   0  15   -3.10   13.90
  16   1  15   25.10   10.40
  17   1  15   -0.40   13.70
  17   2  15   26.90   14.00
  17   3  15    4.40   14.90
  17   4  15   25.70   13.20
  17  -7  14  -33.20   15.40
  16  -6  14    3.70   14.50
  15  -5  14    9.60    9.30
  15  -4  14    0.60   13.00
  14  -3  14   -5.30    9.00
  14  -2  14   29.10   12.30
  14  -1  14   95.59   12.30
  14   0  14  218.88   12.60
  14   1  14  121.59   12.00
  14   2  14   22.00   11.40
  14   3  14    6.30   10.70
  15   5  14    8.50   11.60
  16   7  14   43.20   12.30
  16  -9  13   18.60   14.40
  15  -8  13   26.40   12.70
  14  -7  13   41.00    9.30
  13  -5  13  100.79   11.60
  12  -3  13   34.30    7.80
  12  -2  13   42.10   10.20
  12  -1  13   78.39    9.20
  12   2  13   38.30    8.50
  12   3  13   53.19    9.30
  12   4  13   60.19    6.70
  13   6  13    6.10    9.40
  15   9  13   17.40   10.50
  16  10  13   13.40   10.10
  16 -11  12   11.40   17.00
  15 -10  12   23.10   14.30
  14  -9  12   59.39   12.70
  13  -8  12    4.30   11.10
  12  -7  12  100.89    7.60
  11  -5  12  117.49    7.00
  10  -2  12   63.89    6.00
  10  -1  12   59.49    7.60
  10   0  12  474.65    8.90
  10   1  12   58.79    7.80
  10   2  12   74.29    8.00
  11   6  12  159.48    7.20
  13   9  12   59.69    8.10
  14  10  12   17.00    8.00
  15  11  12   31.80    9.50
  15 -12  11   -8.60   14.90
  14 -11  11   31.70   13.50
  13 -10  11   33.10   11.20
  12  -9  11   59.19   10.80
  11  -8  11   29.90    7.00
  10  -6  11  118.29    9.00
   9  -4  11   88.49    5.70
   9  -3  11  200.38    7.90
   9   4  11   93.99    6.80
  10   7  11   83.39    6.80
  12  10  11   18.70    6.90
  13  11  11   41.20    7.80
  14  12  11   17.70    8.30
  15  13  11    0.00    8.40
  14 -13  10   18.40    9.90
  13 -12  10   36.20   12.70
  12 -11  10   26.30   11.00
  11 -10  10   66.29    9.10
   9  -7  10    4.10    7.10
   8  -4  10   47.50    6.90
   8   5  10  162.88    5.50
   9   8  10   22.10    5.10
  11  11  10   65.69    5.60
  12  12  10   68.59    6.30
  13  13  10    5.40    6.60
  15 -15   9    2.50   11.30
  14 -14   9   27.90   13.30
   9  -9   9  262.47    8.60
   8  -7   9   46.60    6.80
   7  -5   9    7.90    6.30
   6   0   9   29.40    3.80
   6   1   9  479.05    4.70
   7   6   9   38.70    4.60
   9  10   9   22.70    4.40
  14  15   9    8.40    7.20
  12 -14   8    1.90    7.70
  11 -13   8   73.49    9.80
  10 -12   8   43.80    9.20
   9 -11   8   82.59    6.00
   6  -5   8   58.69    5.90
   5   0   8    1.40    3.40
   6   6   8   48.70    4.10
  12 -15   7   55.39   11.30
  11 -14   7   14.50    9.80
  10 -13   7   -2.50    8.40
   9 -12   7   30.20    8.20
   8 -11   7   33.80    7.10
   5  -5   7  323.87    5.90
   5   6   7  251.97    3.40
   9  13   7   43.40    4.00
  11  15   7   30.30    4.40
  14 -17   6    9.30   11.70
  12 -16   6    0.30   10.60
  11 -15   6   42.60    9.30
   8 -12   6   44.90    6.80
   7 -11   6    1.80    6.10
   4  -4   6   81.49    4.60
  11 -16   5   19.00    9.70
   7 -12   5  272.97    7.00
   5  -9   5   50.59    5.00
   3  -3   5   35.00    4.10
   3   4   5  190.38    2.50
   7  13   5   21.80    2.30
  13 -18   4    7.30   12.50
  11 -17   4   86.59    9.10
  10 -16   4   61.89    8.70
   7 -13   4   13.50    6.10
   3  -6   4  882.11    4.40
   2   0   4  590.64    3.80
   2   1   4  167.28    2.90
   1  -2   2 1021.00    2.80
   4  12   2  312.17    1.50
   7  16   2  160.38    2.00
  10 -18   1   11.70    7.60
   5 -13   1   70.19    4.80
   2   9   1  127.49    1.50
   8 -17   0   21.60    5.60
   7 -16   0   53.79    4.90
   6 -15   0    1.00    4.30
   2  10   0   19.80    1.90
   3  12   0  136.09    2.60
   5  15   0   20.50    3.10
   9  19   0    1.60    4.10
  10 -19  -1   46.00    7.20
   4 -13  -1   16.90    3.30
  11 -20  -2   23.60    7.60
   3 -12  -2  134.39    2.40
   5  16  -2   61.59    4.50
   8  19  -2   12.90    5.30
   1  10  -3  150.28    3.20
   2  12  -3   50.49    3.60
  -1   3  -4  221.78    2.70
   0   8  -4   17.00    3.70
   3  14  -4    1.70    4.20
  10 -20  -5    8.80    6.40
   1  11  -5  213.48    4.80
   5  17  -5   10.40    6.80
   6  18  -5   40.60    6.20
   7  19  -5   20.20    7.30
  -1   5  -6  225.98    3.70
   0   9  -6  405.56    5.40
   2  13  -6   47.90    5.40
   4  16  -6   24.50    6.40
   7  19  -6   22.30    7.70
   8  20  -6   30.60    8.70
   0  -8  -7   -0.40    1.70
  -1   6  -7  320.37    5.20
   0   9  -7    2.20    5.00
   4  16  -7    6.60    7.00
   8  20  -7   10.10    9.20
   7 -18  -8   22.00    2.80
  -1  -5  -8  122.79    3.30
  -1   6  -8  224.48    5.60
   0   9  -8   27.90    4.10
   3  15  -8  112.79    6.80
   4  16  -8   27.30    7.00
  -1  -5  -9   75.69    3.60
  -1   6  -9   72.99    5.80
   0   9  -9   -4.00    4.20
   3  15  -9   37.50    7.30
   4  16  -9   37.90    7.90
   0  -8 -10  438.66    4.20
  -1   6 -10   97.09    6.00
   0   9 -10  124.79    7.20
   2  13 -10   20.80    5.90
   4  16 -10  163.18    9.80
   4 -15 -11   29.20    3.30
   2 -12 -11   66.89    3.70
  -1  -4 -11  293.17    5.10
  -1   5 -11   74.89    5.90
   0   9 -11    4.10    7.10
   1  11 -11   16.50    7.40
   2  13 -11   74.29    8.80
   4  16 -11   45.70   10.40
   5  17 -11   74.39   11.00
   6  18 -11    3.60   10.50
   6 -17 -12   17.00    3.40
   1 -10 -12   23.10    4.80
  -1  -3 -12   95.79    5.30
  -1   4 -12  122.39    5.20
  -1   5 -12  295.77    7.20
   0   8 -12  225.88    6.00
   1  11 -12   82.39    8.70
   2  13 -12   47.80    8.80
   5  17 -12   19.50   11.60
   6  18 -12   29.40   12.80
   3 -13 -13   41.90    4.80
   0  -7 -13    3.10    5.00
  -1  -2 -13  105.89    6.40
  -1  -1 -13   23.20    4.80
  -1   2 -13  105.29    5.50
  -1   3 -13  120.99    7.30
   0   8 -13    0.50    8.00
   3  14 -13   58.09   10.60
   4 -14 -14   12.90    5.20
   2 -11 -14   -1.40    5.70
   1  -9 -14  108.39    6.20
   0  -6 -14   19.00    6.20
  -1   0 -14    5.30    6.80
  -1   1 -14   -1.50    7.00
   0   7 -14   17.30    8.70
   1  10 -14    5.70    9.60
   2  12 -14   45.80   10.80
   4  15 -14   42.70   13.40
   5 -15 -15   68.49    7.00
   3 -12 -15   32.70    5.90
   1  -8 -15   23.60    6.70
   0  -5 -15   -1.70    7.10
   0   6 -15    5.30    8.90
   1   9 -15   84.59    9.70
   2  11 -15    7.80    8.30
   3  13 -15   76.99   11.80
   5  16 -15   97.29   15.20
   4 -13 -16   71.59    6.80
   1  -7 -16   -2.10    7.10
   0  -4 -16  263.37    8.00
   0  -3 -16   39.70    7.90
   0   4 -16  284.37    9.60
   0   5 -16  214.68    9.40
   1   8 -16   22.80   10.00
   2  11 -16   72.99   11.60
   4  14 -16   36.30   14.60
   3 -11 -17   11.70    8.60
   2  -9 -17   -8.30    8.60
   1  -6 -17   31.10    8.80
   0  -1 -17   -2.80    8.80
   0   0 -17   -1.80    9.60
   0   1 -17   -8.70    9.50
   0   2 -17   -4.40    9.60
   1   7 -17   22.00   11.20
   2  10 -17    1.70   12.60
   3  12 -17   92.49   13.80
   3 -10 -18   -0.40    9.10
   2  -8 -18    1.80   10.10
   1  -4 -18    1.00    8.90
   1   5 -18   83.19   10.80
   1   6 -18   10.70   10.90
   2   9 -18   21.60   12.50
   3  11 -18    6.10   14.70
   3  -9 -19   17.70    9.10
   2  -6 -19   15.40    9.80
   1  -2 -19   47.40   10.70
   1  -1 -19   21.40   11.60
   1   0 -19   -6.30   12.10
   1   1 -19    3.10   11.40
   1   2 -19   45.90   12.40
   1   3 -19    8.70   12.70
   2   7 -19   -4.90   12.30
   3  10 -19   63.49   16.10
   2  -4 -20   48.00   12.10
   2   5 -20   45.40   13.80
   3   8 -20   99.09   11.40
   3  -6 -21   17.10   11.80
   2  -1 -21   74.99   12.80
   2   0 -21    7.90   13.80
   2   1 -21   88.59   14.90
   2   2 -21   36.40   13.80
   3   6 -21    0.70   11.70
   3  -1 -22   25.80   11.60
  17  -6  14   21.50   14.40
  16  -5  14   42.40   10.20
  16  -4  14   17.10   14.70
  15  -3  14   37.60    9.60
  15  -2  14    0.80   12.50
  15  -1  14   47.30   12.10
  15   2  14   16.60   11.00
  15   3  14   45.10   12.00
  15   4  14    3.10   10.60
  16   5  14   55.09   11.40
  16   6  14    8.90   11.00
  17   7  14    4.70   12.90
  16  -8  13   10.60   13.40
  15  -7  13   63.59   12.10
  14  -6  13   39.70    8.80
  14  -5  13   36.90   12.00
  13  -4  13   28.80    8.00
  13  -3  13   -3.90   10.30
  12   0  13   65.79    7.20
  12   1  13   82.59    7.10
  13   4  13   32.90    8.80
  13   5  13  107.59    9.00
  14   7  13   21.30    9.10
  15   8  13   26.30   10.70
  16   9  13   15.20   11.10
  16 -10  12   10.00   15.50
  15  -9  12    1.50   12.60
  14  -8  12   -1.40   11.00
  13  -7  12  101.79   11.10
  12  -6  12   45.00    7.40
  12  -5  12  130.69    9.80
  11  -4  12  107.19    7.20
  11  -3  12   76.49    9.00
  11   4  12  120.09    8.20
  11   5  12  107.89    5.70
  12   7  12  100.69    8.10
  16 -12  11    6.50   15.70
  15 -11  11    9.80   13.00
  12  -8  11   54.09    9.40
  11  -7  11   16.90    9.00
  10  -5  11  165.28    8.70
   9  -2  11   14.40    5.10
   9  -1  11   77.79    7.30
   9   0  11    2.80    7.00
   9   1  11   98.89    7.10
   9   2  11    9.00    6.80
   9   3  11  199.88    6.80
  10   6  11   98.39    6.60
  11   8  11   28.90    6.90
  15 -13  10   17.50   13.30
  14 -12  10   11.60   13.30
  11  -9  10  106.89    9.60
  10  -8  10   26.50    6.30
   9  -6  10   29.60    7.80
   8  -3  10  625.54    8.00
   8   4  10   44.90    5.60
   9   7  10   -4.10    5.10
  10   9  10   12.50    5.50
  15  14  10   23.10    8.70
  15 -14   9   50.29   13.40
  13 -13   9   32.70   11.20
  12 -12   9   46.80   10.90
  11 -11   9   81.19    9.90
  10 -10   9   87.59    6.20
   7  -4   9  106.29    6.50
   7   5   9   14.90    4.70
   8   8   9    3.70    4.40
  10  11   9   10.80    5.40
  13  14   9    8.80    6.70
  14 -15   8   14.90   10.00
  13 -14   8   66.19   12.20
   9 -10   8    6.70    7.80
   8  -9   8   18.00    5.30
   7  -7   8   79.89    6.40
   6  -4   8  199.28    6.00
   7   8   8  272.37    4.80
   8  10   8   18.50    4.20
  14  16   8   13.50    6.80
  14 -16   7   -1.10   11.90
   7  -9   7   51.99    6.20
   6  -7   7    0.70    5.50
   5  -4   7   53.39    5.50
  10  14   7   57.99    4.40
  10 -14   6   94.59    8.10
   9 -13   6   28.60    7.50
   6  -9   6   26.70    4.20
   5  -7   6   90.49    4.00
   4   5   6  216.38    3.00
   5   8   6   48.50    2.80
   6  10   6  101.99    2.90
   8  13   6   58.69    3.10
  11  16   6   27.50    3.80
  13 -17   5   15.00   11.70
  10 -15   5   31.40    8.30
   9 -14   5   92.19    7.80
   8 -13   5  116.09    6.70
   4  -6   5   52.19    4.40
   3  -2   5  600.54    4.40
   9 -15   4   56.69    7.10
   8 -14   4   64.69    6.50
   5 -10   4  283.87    5.00
   4  -8   4   26.50    4.30
   7  14   4   16.00    1.50
   2  -4   3  160.78    3.20
  13 -19   2   59.29   11.80
  11 -18   2  104.59    9.30
   1  -1   2  184.98    2.30
  12 -19   1    3.70   10.30
   9 -17   1   86.39    6.90
   6 -14   1    5.20    4.90
   4  13   1   24.20    2.10
  11  20   1   43.90    3.60
  11 -19   0   29.60    8.30
   1  -6   0 1321.57    2.80
   9 -18  -1   27.80    6.20
   0   5  -1   -1.60    1.60
   2  11  -1  119.29    2.80
   1  -8  -2   24.70    1.20
   4  15  -2   30.70    4.10
   9  20  -2   19.80    6.00
  11 -20  -3   39.70    8.00
   8 -18  -3    8.00    4.90
   5 -15  -3   31.10    3.40
  -1   0  -3    0.30    2.60
  -1   1  -3  233.38    3.10
  -1   2  -3 1325.27    4.20
   3  14  -3   54.59    4.40
   9 -19  -4   17.50    5.30
   0  -7  -4  430.36    1.30
  -1   4  -4  224.28    3.60
   5  17  -4   38.40    5.80
   6  18  -4   12.30    6.40
   7  19  -4  116.49    7.20
  -1  -4  -5  231.58    2.70
  -1   5  -5   89.69    3.00
   0   9  -5   -1.20    4.10
   2  13  -5  108.59    4.60
   4  16  -5   15.00    5.40
   8  20  -5    3.10    8.10
   0  -8  -6  387.76    2.20
  -1   6  -6  194.08    5.00
   3  15  -6    0.30    5.60
   6 -17  -7   15.40    2.60
  -1  -5  -7   40.30    2.60
   1  12  -7  167.58    5.60
   3  15  -7   47.10    6.70
   1  12  -8  268.27    7.00
  -1   7  -9   63.89    5.50
   0  10  -9   -7.10    5.90
   1  12  -9  127.49    7.20
  -1  -5 -10  131.79    4.30
   1  12 -10   29.20    7.80
   3  15 -10   20.40    8.10
   0  -8 -11   -1.30    3.80
  -1  -5 -11   64.29    4.80
  -1   6 -11  171.38    5.00
   3  15 -11   98.49    9.90
   7 -18 -12    9.80    2.50
   5 -16 -12   17.50    3.50
   2 -12 -12   18.30    4.30
   0  -8 -12  226.08    5.30
  -1  -4 -12  116.49    4.00
  -1   6 -12  150.78    7.30
   0   9 -12  188.18    7.80
   3  15 -12   33.10    9.50
   4  16 -12  124.99   10.60
  -1  -4 -13   76.79    5.80
  -1  -3 -13  116.69    4.30
  -1   4 -13   64.79    5.50
  -1   5 -13  646.94    8.90
   0   9 -13   -0.20    7.80
   1  11 -13   40.70    9.70
   2  13 -13  114.09   10.50
   4  16 -13    6.10   12.10
   5  17 -13   66.49   12.50
   3 -13 -14   12.90    5.30
  -1  -2 -14   56.39    7.10
  -1  -1 -14    4.70    5.20
  -1   2 -14   43.80    5.30
  -1   3 -14   42.40    7.00
  -1   4 -14  144.09    8.10
   0   8 -14   72.69    9.10
   3  14 -14   67.49   11.00
   0  -6 -15    3.60    6.70
  -1   0 -15    5.10    7.10
  -1   1 -15   25.50    7.40
   0   7 -15    6.80    9.10
   1  10 -15   30.90   10.90
   2  12 -15  121.59   12.70
   4  15 -15   29.60   13.00
   3 -12 -16   22.90    7.50
   2 -10 -16    9.50    6.80
   1  -8 -16   21.00    7.40
   0  -5 -16  189.28    7.60
   0   6 -16   31.30    9.80
   1   9 -16   35.20   10.10
   3  13 -16   15.30   12.20
   1  -7 -17   11.40    8.40
   0  -3 -17   -3.90    8.80
   0  -2 -17   -2.20    6.80
   0   3 -17    2.60    7.20
   0   4 -17   -0.20    9.70
   1   8 -17   16.20   10.70
   4  14 -17   23.30   15.90
   4 -12 -18   28.30    8.70
   1  -5 -18   78.79    7.50
   1   7 -18  145.89   12.30
   2  10 -18   31.70   12.70
   3  12 -18  -12.20   14.30
   4 -11 -19   -1.20    9.20
   2  -7 -19   -2.80   10.10
   1  -4 -19   80.29   11.10
   1  -3 -19    8.00    9.50
   1   4 -19   78.79    8.90
   1   5 -19   14.50   11.80
   2   8 -19    6.90   10.30
   3  11 -19   14.70   15.90
   3  -8 -20  102.19   11.00
   2  -6 -20   13.30   10.40
   2  -5 -20   39.30    8.50
   1   0 -20    8.10   11.70
   1   1 -20   10.40   12.10
   1   2 -20    0.10   12.40
   2   6 -20    5.10   10.10
   2   7 -20    0.20   14.70
   3   9 -20   20.90   12.20
   2  -3 -21   71.79   13.80
   2  -2 -21   40.90   10.40
   2   3 -21   60.69   11.50
   2   4 -21   44.20   16.00
   2   5 -21   50.29   15.00
  17  -5  14    4.20   11.80
  17  -4  14   12.30   15.60
  16  -3  14    8.80   13.50
  16  -2  14   35.90   14.60
  16  -1  14   21.90   13.00
  15   0  14    2.50    9.70
  15   1  14   44.30    9.20
  16   3  14   17.20   12.20
  16   4  14   25.10   13.00
  17   5  14   -2.20   12.60
  17   6  14   28.00   13.00
  17  -8  13   -2.90   11.70
  16  -7  13   -5.80   12.80
  15  -6  13   30.30    9.60
  15  -5  13   56.29   11.70
  14  -4  13   24.30   11.60
  13  -2  13  102.99    7.90
  13  -1  13    8.00   10.50
  13   0  13    2.00   10.50
  13   1  13    1.40   10.00
  13   2  13  108.39    9.90
  13   3  13    4.90    8.80
  14   5  13   31.40    9.90
  14   6  13   18.80    9.20
  15   7  13   49.00   10.90
  16   8  13   20.20   10.70
  17 -10  12   15.50   17.10
  16  -9  12   53.89   13.50
  14  -7  12   10.00   10.90
  13  -6  12   21.50   10.70
  12  -4  12  131.99    9.80
  11  -2  12    1.50    6.50
  11  -1  12   36.30    8.30
  11   0  12    6.30    8.20
  11   1  12   46.80    8.30
  11   2  12    1.20    8.10
  11   3  12   77.29    7.80
  12   6  12   40.70    8.10
  13   8  12   10.00    7.60
  14   9  12   64.49    9.60
  15  10  12   19.70    9.70
  16  11  12   13.60   10.40
  16 -11  11   14.40   13.80
  14 -10  11   19.80    9.70
  13  -9  11   47.80    8.20
  11  -6  11   16.90    9.00
  10  -4  11  165.28    6.10
  10  -3  11   70.29    7.40
  10   5  11  151.98    6.80
  12   9  11   45.80    7.30
  15  12  11    2.00    9.10
  16 -13  10    3.60   14.30
  15 -12  10   16.60   13.00
  13 -11  10   10.30    8.80
  12 -10  10    0.20    8.10
  10  -7  10    8.70    8.20
   9  -5  10    1.20    7.40
   8  -2  10   12.80    4.90
   8  -1  10  369.26    7.00
   8   0  10   53.59    6.30
   8   1  10  379.16    6.40
   8   2  10   17.10    5.80
   8   3  10  561.04    6.60
  11  10  10   57.59    6.00
  14  13  10   31.00    8.30
  16 -14   9   41.30   14.50
  14 -13   9   -4.80   12.90
  10  -9   9   69.89    8.30
   9  -8   9   85.99    5.70
   8  -6   9   78.89    5.40
   7  -3   9   40.20    4.80
   7  -2   9    7.80    5.40
   7   4   9   91.59    4.90
  11  12   9   48.90    4.90
  12  13   9   76.99    6.30
  15 -15   8   31.30   13.40
  12 -13   8   17.30    7.50
  11 -12   8   21.90    9.60
  10 -11   8  153.68    8.50
   8  -8   8   40.90    7.10
   7  -6   8  780.12    7.60
   6  -3   8   25.90    5.60
   6   5   8   47.00    4.00
  15 -16   7   33.20   14.60
  13 -15   7    3.10    8.10
  12 -14   7   69.69   10.10
   9 -11   7   17.30    7.30
   8 -10   7   29.20    6.80
   5  -3   7   36.20    5.40
   5   5   7  282.87    3.70
   6   8   7  203.48    3.50
   7  10   7   44.10    3.00
  13 -16   6   22.80    8.70
  12 -15   6   36.30   10.80
   7 -10   6   83.19    6.00
   5  -6   6    7.30    5.00
   4  -3   6  715.33    4.50
   4   4   6   67.79    3.00
   9  14   6   48.70    3.20
  10  15   6   84.09    3.50
  12 -16   5    7.30   10.40
   6 -10   5  259.77    4.50
   5  -8   5  623.84    5.90
   3  -1   5   38.50    3.50
   3   3   5   29.10    2.50
  12 -17   4   45.80    9.70
   6 -11   4  193.88    5.60
   3  -5   4  154.88    4.00
   3  -7   3  107.49    2.90
  10 -17   2   10.20    7.80
   9 -16   2    2.70    7.60
   1   2   2  982.60    2.10
   8 -16   1  101.69    6.30
   7 -15   1   49.00    5.60
  10 -18   0    4.10    7.60
   4 -12   0   14.80    3.10
   8 -17  -1    9.40    5.10
   7 -16  -1   30.00    5.30
   6 -15  -1   29.00    4.50
   5 -14  -1   43.90    3.30
   1  -7  -1  433.26    1.90
   3  13  -1   48.20    3.10
   6  17  -1   74.89    4.20
   7  18  -1   85.89    4.60
  10 -19  -2   30.20    6.60
   2  12  -2   10.50    3.70
   7 -17  -3   66.19    4.60
   6 -16  -3   58.69    4.00
  -1  -1  -3  221.98    2.50
  -1   3  -3   89.09    3.20
   0   8  -3   -7.20    3.20
  -1  -3  -4  209.88    2.20
  -1   5  -4  319.87    3.70
   1  11  -4   95.69    4.00
   2  13  -4  130.49    4.40
   4  16  -4   32.00    5.70
   8  20  -4    8.70    7.20
  -1   6  -5  165.38    4.40
   3  15  -5   84.19    5.20
  -1  -5  -6  221.68    2.40
   1  12  -6  175.88    5.40
  -1   7  -7   50.49    4.90
   0  10  -7    7.60    5.30
   2  14  -7   27.90    6.20
  -1   7  -8  204.78    4.20
   0  10  -8  179.88    4.50
   2  14  -8   41.00    6.80
   5  18  -8   43.70    8.00
   6  19  -8   12.70    9.70
   3 -14  -9   33.50    1.90
  -1  -6  -9   63.59    3.80
   2  14  -9   63.99    7.10
   4  17  -9   13.00    9.80
   5  18  -9  177.78   10.00
   6  19  -9    9.70    9.90
   3 -14 -10  114.49    2.90
  -1   7 -10  156.68    5.00
   0  10 -10  151.48    5.50
   2  14 -10   81.49    8.10
[truncated: 1,336,018 more chars]
